# Supplementary material for: Long Noncoding RNA Expression Signatures of Metastatic Nasopharyngeal Carcinoma and Their Prognostic Value
Source: Biomed Res Int. 2015 Sep 13;2015:618924. doi: 10.1155/2015/618924 (PMC4584063; doi:10.1155/2015/618924)
Supplement: Supplementary file 1 — Table S01. The clinical information corresponding to the seven NPC patient samples used for microarray analysis. Table S02. Four different lncRNA members (LOC84740, ENST00000498296, AL359062, and ENST00000438550) were selected to verify their expression levels via QPCR. This table supply the primer sequences used for Real-time PCR of the four lncRNAs. Table S03. lncRNA Expression Profiling Data. A total of 33,045 lncRNA probes were used in our lncRNA microarray. Up to 30,610 lncRNAs were detected in all seven samples. Table S04. Differentially Expressed lncRNAs. A total of 8,088 lncRNAs were identified to be significantly differentially expressed(≥2-fold) between the metastatic and primary NPC tumors in the microarray. Among these, 3,778 lncRNAs were found to be consistently upregulated; 4,310 lncRNAs were downregulated. Table S05. HOX cluster profiling. In this study, we detected the transcripts in HOX loci, 477 transcribed regions were found. Among them, 257 were ncRNAs and 220 were HOX coding transcripts. Table S06. Differentially expressed IncRNAs at HOX locus. In the four randomly paired groups, the number of differentially expressed lncRNAs differed, but several lncRNAs displayed similar changes in expression. Compared with the NPC primary tumors, 70 lncRNAs were found to be differentially expressed in metastatic tissues; 51 coding transcripts were differentially expressed. Table S07. Rinn lincRNA expression profiles. A total of 4,199 Rinn lincRNAs were detected in this microarray analysis. Table S08. Differentially expressed Rinn lincRNAs. A total of 1,069 Rinn lincRNAs were found to be differentially expressed. Table S09. Enhancer lncRNAs profiles. A total of 1,598 enhancer lncRNAs were detected, of which 468 lncRNAs were differentially expressed. Table S10. Data for enhancer lncRNAs regulating a nearby coding gene. The differentially expressed enhancer lncRNAs and their nearby coding genes (distance < 300 kb) were presented. Table S11. Data for lincRNAs reg [file 618924.f1.zip › S02 Primer sequence.xlsx]

## Sheet: Sheet1
Gene Name		Sequence	Length
LOC84740	-F-	5’-tcgctcaatggagtgacggca-3’	21
	-R-	5’-cggctgagaccgctgagaactt-3’	22
ENST00000498296	-F-	5’- gtgctattgccccatgtgaa -3’	20
	-R-	5’- tgatgccgaaaacctgtaagaa -3’	22
AL359062	-F-	5’- caatggtgctaatctcagacctaaa -3’	25
	-R-	5’- tcaaaagggaaatacaggcaca -3’	22
ENST00000438550	-F-	5’- agcaagtggaatgaaagaacagaac -3’	25
	-R-	5’- acctcttctattgccagaaccaac-3’	24
