# Supplementary material for: Long Noncoding RNA Expression Signatures of Metastatic Nasopharyngeal Carcinoma and Their Prognostic Value
Source: Biomed Res Int. 2015 Sep 13;2015:618924. doi: 10.1155/2015/618924 (PMC4584063; doi:10.1155/2015/618924)
Supplement: Supplementary file 1 — Table S01. The clinical information corresponding to the seven NPC patient samples used for microarray analysis. Table S02. Four different lncRNA members (LOC84740, ENST00000498296, AL359062, and ENST00000438550) were selected to verify their expression levels via QPCR. This table supply the primer sequences used for Real-time PCR of the four lncRNAs. Table S03. lncRNA Expression Profiling Data. A total of 33,045 lncRNA probes were used in our lncRNA microarray. Up to 30,610 lncRNAs were detected in all seven samples. Table S04. Differentially Expressed lncRNAs. A total of 8,088 lncRNAs were identified to be significantly differentially expressed(≥2-fold) between the metastatic and primary NPC tumors in the microarray. Among these, 3,778 lncRNAs were found to be consistently upregulated; 4,310 lncRNAs were downregulated. Table S05. HOX cluster profiling. In this study, we detected the transcripts in HOX loci, 477 transcribed regions were found. Among them, 257 were ncRNAs and 220 were HOX coding transcripts. Table S06. Differentially expressed IncRNAs at HOX locus. In the four randomly paired groups, the number of differentially expressed lncRNAs differed, but several lncRNAs displayed similar changes in expression. Compared with the NPC primary tumors, 70 lncRNAs were found to be differentially expressed in metastatic tissues; 51 coding transcripts were differentially expressed. Table S07. Rinn lincRNA expression profiles. A total of 4,199 Rinn lincRNAs were detected in this microarray analysis. Table S08. Differentially expressed Rinn lincRNAs. A total of 1,069 Rinn lincRNAs were found to be differentially expressed. Table S09. Enhancer lncRNAs profiles. A total of 1,598 enhancer lncRNAs were detected, of which 468 lncRNAs were differentially expressed. Table S10. Data for enhancer lncRNAs regulating a nearby coding gene. The differentially expressed enhancer lncRNAs and their nearby coding genes (distance < 300 kb) were presented. Table S11. Data for lincRNAs reg [file 618924.f1.zip › S03 lncRNA Expression Profiling Data.xls]

## Sheet: All Targets Value - LncRNAs
All Targets Value (Entities where at least 4 out of 7 samples have flags in Present or Marginal) # Column A: ProbeName, it represents the probe name. # Column B ~ H: Raw Intensity of each sample. # Column I ~ O: Log2 value of Normalized Intensity of each sample. # Column P~V: Flags, flags are attributes that denote the quality of the entities (auto-flagging by GeneSpring GX v11.5.1 software). # C…
	Raw Intensity							Normalized Intensity							Flags							Annotations
ProbeName	[M1](raw)	[2](raw)	[M3](raw)	[T1](raw)	[T2](raw)	[T3](raw)	[T](raw)	[M1](normalized)	[M2](normalized)	[M3](normalized)	[T1](normalized)	[T2](normalized)	[T3](normalized)	[T4](normalized)	[M2]	[M1]	[M3]	[T4]	[T2]	[T3]	[T1]	type	seqname	GeneSymbol	source	RNAlength	chrom	strand	txStart	txEnd	probeSeq	relationship	Associated_gene_acc	Associated_gene_name	Associated_protein_name	Associated_gene_strand	Associated_gene_start	Associated_gene_end
CUST_385_PI426073487	61.5221	52.163	58.1348	48.9983	43.5293	43.2783	46.1586	6.06946	5.8652	6.03914	5.46257	5.35729	5.32789	5.31365	P	P	P	P	M	M	M	noncoding	uc.387+	uc.387	UCR	238	chr15	+	42032053	42032291	ACTTGTTTCAGGTTAATGGTAAGAGTTACCCGCAGGCTAAGTTGCTATTGGGACAGATGG	exon sense-overlapping	NM_001080541	MGA	MAX gene-associated protein isoform 2	+	41952609	42062141
CUST_385_PI426073487	61.5221	52.163	58.1348	48.9983	43.5293	43.2783	46.1586	6.06946	5.8652	6.03914	5.46257	5.35729	5.32789	5.31365	P	P	P	P	M	M	M	noncoding	uc.387+	uc.387	UCR	238	chr15	+	42032053	42032291	ACTTGTTTCAGGTTAATGGTAAGAGTTACCCGCAGGCTAAGTTGCTATTGGGACAGATGG	exon sense-overlapping	NM_001164273	MGA	MAX gene-associated protein isoform 1	+	41952609	42062141
ASHG19A3A032313	24.5957	24.4993	23.2513	22.5114	24.5721	15.5602	46.961	4.78888	4.86083	4.76835	4.28277	4.49765	3.76003	5.34154	A	M	P	P	M	M	M	noncoding	ENST00000435810	RP11-252P19.1	Ensembl	1122	chr6	+	166167676	166189268	GAAACATCTTCCCAGAAAACAGACTACAACAAATCATTTCCCTGGTATGAAGGAATGAAG	intergenic
ASHG19A3L0000337	36.0878	39.0981	34.3496	43.4549	15.6239	38.641	19.7896	5.3287	5.48051	5.30856	5.28036	3.8082	5.15892	4.00899	P	M	P	P	M	M	M	noncoding	W19582	lincRNA-ETS1-2	lincRNA	540	chr11	+	128050349	128053029	AGATATCTGGTTGAGACCAAGTAAGAGATAAACCTGTAGATTCCACTGTGCCACCACAGT	intergenic
ASHG19A3A014810	51369.9	47982.1	25928.1	10980.8	15532.4	15942.6	15330.9	15.3774	15.3162	14.4636	13.5924	14.1207	14.1153	13.9996	P	M	P	P	M	M	M	noncoding	ENST00000399556	AC010746.4	Ensembl	865	chr2	-	198244424	198245616	GGACAAGAATCCTTCAAAAAACAGGAAAAAACTCCTAAAACACCTAAAAGGACCTAGTTC	intergenic
ASHG19A3A016408	12.6176	8.09841	8.37389	44.4419	34.0321	34.8307	38.7621	3.83841	3.5438	3.37745	5.31771	4.98837	4.99984	5.04918	A	A	A	M	M	M	M	noncoding	uc002tuv.1	AK097922	UCSC_knowngene	1862	chr2	+	136577760	136580657	TTGAAGTGGATTGAGAGGATGGAACAATAGAAGGAGGATATGGCTCAGGACAGTCAAGTA	natural antisense	NM_002299	LCT	lactase-phlorizin hydrolase preproprotein	-	136545414	136594750
ASHG19A3A050157	40.3898	36.5768	31.6693	79.0506	63.3753	29.4824	29.985	5.48004	5.39256	5.1992	6.18673	5.92715	4.75239	4.65817	P	M	P	M	M	M	M	noncoding	ENST00000455126	RP11-83N23.2	Ensembl	294	chr13	+	47426277	47430434	CAAGTACATCTTCCTTGCTGACAATATGCTCTCCTATCTTTTGTAAGAGTACACAATTTA	intronic antisense	NM_001165947	HTR2A	5-hydroxytryptamine receptor 2A isoform 2	-	47407512	47471169
ASHG19A3A050157	40.3898	36.5768	31.6693	79.0506	63.3753	29.4824	29.985	5.48004	5.39256	5.1992	6.18673	5.92715	4.75239	4.65817	P	M	P	M	M	M	M	noncoding	ENST00000455126	RP11-83N23.2	Ensembl	294	chr13	+	47426277	47430434	CAAGTACATCTTCCTTGCTGACAATATGCTCTCCTATCTTTTGTAAGAGTACACAATTTA	intronic antisense	NM_000621	HTR2A	5-hydroxytryptamine receptor 2A isoform 1	-	47407512	47471169
ASHG19A3A019949	220.911	226.927	190.538	194.605	66.6784	84.7847	64.8719	7.83207	7.86229	7.66721	7.53321	6.00196	6.32187	5.82683	P	M	P	P	M	M	M	noncoding	ENST00000413815	RP11-191L9.5	Ensembl	809	chr22	-	48058238	48059352	AGGTGTCAGAAGTGTGAGCCTGAAGGCCTAAGAGGTGTTGCAGCTTCTTTACCATTTTTT	intergenic
ASHG19A3A026653	22847.2	21590.9	18610.5	11899.9	14113.6	13948.2	12841.9	14.2365	14.1832	14.0177	13.7049	13.9748	13.9229	13.7307	P	M	P	P	M	M	M	noncoding	ENST00000440440	BRI3P1	Ensembl	378	chr1	+	100678848	100679226	ATTTGCTGTTTTGCCTTGAGGGAGCGAAGATGCCCCAACTGTGGAGCCACCTTCGCTTAA	intronic antisense	NM_001918	DBT	lipoamide acyltransferase component of	-	100652477	100715409
ASHG19A3A037731	381.199	389.666	283.937	34.4937	29.9081	29.6414	25.8262	8.57748	8.59483	8.20758	4.93388	4.7963	4.76119	4.4279	P	P	P	P	M	M	M	noncoding	ENST00000426188	AL691447.1	Ensembl	330	chr9	-	97109515	97109845	CTGAAATCATTGCCAAGGACTTAAAGGAGAAGAAGGAAGTTGTGAAAGACGCGGAAAATG	intergenic
ASHG19A3A016972	799.377	810.413	674.242	1021.57	1157.26	1132.1	1181.49	9.5507	9.57728	9.37883	10.0704	10.297	10.2464	10.2304	P	P	P	P	M	M	M	noncoding	AK093901		misc_RNA	2046	chr2	+	219120041	219122087	TGACTCTTCTCTTAACAAGGACACACTTGGCGTTAGTATGGATCTAGCCTCAAAGACCCT	intergenic
ASHG19A3A039413	95.9059	89.8569	77.9995	117.659	43.6862	30.8453	30.6462	6.7001	6.60496	6.44355	6.76942	5.36232	4.82024	4.69006	P	P	P	P	M	M	M	noncoding	ENST00000412680	RP11-263F14.3	Ensembl	457	chr9	+	137759864	137760321	TCATGGAGAATGCCCTATTTTTCCCTCTGAGCAGGTGATTCTGACACACCACAACAACTA	intergenic
ASHG19A3A025056	49.9401	43.2205	37.3896	63.9228	81.6905	79.1193	79.8365	5.78062	5.61407	5.4306	5.86223	6.30288	6.22201	6.13913	P	P	P	P	M	M	M	noncoding	uc003ivr.2	BC038563	UCSC_knowngene	780	chr4	-	184415890	184425668	GGTAGGGTAGAGAGACTAGAGGGAATGATTTAGCAATAAAATAGGTTTAAATATCTTCTC	bidirectional	NM_001564	ING2	inhibitor of growth protein 2	+	184426219	184432249
ASHG19A3A054727	161.212	129.968	118.103	46.8468	57.9227	67.038	69.9811	7.40679	7.10903	7.01365	5.39465	5.79075	5.98478	5.93862	P	P	P	P	M	M	M	noncoding	AK124821		misc_RNA	1764	chr16	+	67981589	67983353	CACGCAGATTTGCCTGGCTGATTCCAGAATGTTAAAAGCAAATGACTTTGAAAATGGATG	natural antisense	NM_001145961	SLC12A4	solute carrier family 12 member 4 isoform b	-	67977376	68002597
ASHG19A3A054727	161.212	129.968	118.103	46.8468	57.9227	67.038	69.9811	7.40679	7.10903	7.01365	5.39465	5.79075	5.98478	5.93862	P	P	P	P	M	M	M	noncoding	AK124821		misc_RNA	1764	chr16	+	67981589	67983353	CACGCAGATTTGCCTGGCTGATTCCAGAATGTTAAAAGCAAATGACTTTGAAAATGGATG	natural antisense	NM_001145963	SLC12A4	solute carrier family 12 member 4 isoform d	-	67977376	67997968
ASHG19A3A054727	161.212	129.968	118.103	46.8468	57.9227	67.038	69.9811	7.40679	7.10903	7.01365	5.39465	5.79075	5.98478	5.93862	P	P	P	P	M	M	M	noncoding	AK124821		misc_RNA	1764	chr16	+	67981589	67983353	CACGCAGATTTGCCTGGCTGATTCCAGAATGTTAAAAGCAAATGACTTTGAAAATGGATG	natural antisense	NM_001145964	SLC12A4	solute carrier family 12 member 4 isoform e	-	67977376	68000781
ASHG19A3A054727	161.212	129.968	118.103	46.8468	57.9227	67.038	69.9811	7.40679	7.10903	7.01365	5.39465	5.79075	5.98478	5.93862	P	P	P	P	M	M	M	noncoding	AK124821		misc_RNA	1764	chr16	+	67981589	67983353	CACGCAGATTTGCCTGGCTGATTCCAGAATGTTAAAAGCAAATGACTTTGAAAATGGATG	natural antisense	NM_001145962	SLC12A4	solute carrier family 12 member 4 isoform c	-	67977376	68002597
ASHG19A3A054727	161.212	129.968	118.103	46.8468	57.9227	67.038	69.9811	7.40679	7.10903	7.01365	5.39465	5.79075	5.98478	5.93862	P	P	P	P	M	M	M	noncoding	AK124821		misc_RNA	1764	chr16	+	67981589	67983353	CACGCAGATTTGCCTGGCTGATTCCAGAATGTTAAAAGCAAATGACTTTGAAAATGGATG	natural antisense	NM_005072	SLC12A4	solute carrier family 12 member 4 isoform a	-	67977376	68002597
ASHG19A3A037427	69.6556	60.5332	65.4921	41.4967	30.0861	28.6061	22.1332	6.25358	6.06306	6.19853	5.20901	4.80361	4.70681	4.18783	P	P	P	M	M	M	M	noncoding	ENST00000414355	CR848007.6	Ensembl	343	chr9	-	44021071	44021414	AGCTTTCTGCAGAATGAAACCTCTTTTCCATCCAGAAGCACTGCTGACTGTTTGGTGGTT	intergenic
ASHG19A3A000094	1866.03	1851.89	1572.53	1144.57	787.253	818.447	803.369	10.7186	10.7173	10.5355	10.2467	9.72039	9.74735	9.64301	P	P	P	M	M	M	M	noncoding	ENST00000412736	MEG3	Ensembl	1670	chr14	+	101292454	101327308	TGACTTGAGTAAGAACACGAATTATGCATTACCACTCCCCTGCCCCAGGAGCCACTCCCA	intergenic
ASHG19A3A046989	25593.6	24121.9	21296.9	10340.1	10216.7	9878.55	10980.3	14.3963	14.3375	14.2082	13.495	13.4989	13.4155	13.496	P	P	P	M	M	M	M	noncoding	uc001pqf.2	PAFAH1B2	UCSC_knowngene	2506	chr11	+	117039253	117041759	CATTGGAAGTTTGTGATTTTGCTTTGGCAAAGTTTCATTGACTAGTAGAACTCATTCTGT	intron sense-overlapping	NM_001184746	PAFAH1B2	platelet-activating factor acetylhydrolase IB	+	117014999	117047131
ASHG19A3A046989	25593.6	24121.9	21296.9	10340.1	10216.7	9878.55	10980.3	14.3963	14.3375	14.2082	13.495	13.4989	13.4155	13.496	P	P	P	M	M	M	M	noncoding	uc001pqf.2	PAFAH1B2	UCSC_knowngene	2506	chr11	+	117039253	117041759	CATTGGAAGTTTGTGATTTTGCTTTGGCAAAGTTTCATTGACTAGTAGAACTCATTCTGT	intron sense-overlapping	NM_001184748	PAFAH1B2	platelet-activating factor acetylhydrolase IB	+	117014999	117047592
ASHG19A3A046989	25593.6	24121.9	21296.9	10340.1	10216.7	9878.55	10980.3	14.3963	14.3375	14.2082	13.495	13.4989	13.4155	13.496	P	P	P	M	M	M	M	noncoding	uc001pqf.2	PAFAH1B2	UCSC_knowngene	2506	chr11	+	117039253	117041759	CATTGGAAGTTTGTGATTTTGCTTTGGCAAAGTTTCATTGACTAGTAGAACTCATTCTGT	exon sense-overlapping	NM_002572	PAFAH1B2	platelet-activating factor acetylhydrolase IB	+	117014999	117041761
ASHG19A3A046989	25593.6	24121.9	21296.9	10340.1	10216.7	9878.55	10980.3	14.3963	14.3375	14.2082	13.495	13.4989	13.4155	13.496	P	P	P	M	M	M	M	noncoding	uc001pqf.2	PAFAH1B2	UCSC_knowngene	2506	chr11	+	117039253	117041759	CATTGGAAGTTTGTGATTTTGCTTTGGCAAAGTTTCATTGACTAGTAGAACTCATTCTGT	intron sense-overlapping	NM_001184747	PAFAH1B2	platelet-activating factor acetylhydrolase IB	+	117014999	117047131
ASHG19A3A031964	14.5959	8.03532	7.32624	49.0563	16.7368	15.5997	69.9944	4.04369	3.53682	3.21242	5.46447	3.91482	3.76468	5.93938	A	A	A	M	M	M	M	noncoding	ENST00000415883	RP11-346D19.1	Ensembl	597	chr6	+	113852319	113864995	CCCTGCTGTCTTTATATGTACAACTTGCATTTTGCAAGAGTTTAGAAAGTTGTAACCTTA	intergenic
ASHG19A3L0000965	44.1485	37.4518	36.7487	49.7335	48.7308	32.8709	64.0959	5.60925	5.4231	5.40672	5.48781	5.52637	4.91314	5.80922	P	P	P	M	M	M	M	noncoding	BQ027881	lincRNA-LIPG-1	lincRNA	485	chr18	-	47143727	47144197	AAAGAGAGAACAGAGTTTTATCAGGATCTCTGCTCTACCCACCAAGACTCAAAACCAGGC	intergenic
ASHG19A3A032810	2635	2571.36	2357.84	2065.2	2046.32	2185.45	2027.32	11.2082	11.1805	11.1152	11.1094	11.1296	11.2025	11.0247	P	P	P	M	M	M	M	noncoding	ENST00000434161	CTD-2021A8.3	Ensembl	423	chr7	-	51456093	51457401	TTGACTTTTGGTGGCCTCTTCAGGCCCAGAACTTGACCTCCAGTCGGCCTTGGCAGGCCC	intergenic
ASHG19A3A044327	31.5175	19.6879	25.3692	26.3519	56.8085	41.904	52.7145	5.13404	4.58843	4.89089	4.52883	5.75978	5.27972	5.51639	A	P	P	M	M	M	M	noncoding	ENST00000451083	RP11-310E22.2	Ensembl	565	chr10	+	96943409	96943974	AGCGGAAACGAGAAGGTGCAATGACACAACGGAACCCAATGCAGAATCCAGCCCCAGGAC	intergenic
ASHG19A3A041048	2954.09	2797.92	2851.43	1238.63	1845.22	1374.84	1597.29	11.3709	11.2906	11.3839	10.3654	10.9795	10.5306	10.6777	P	M	P	M	M	M	M	noncoding	ENST00000451120	RP3-390O13.1	Ensembl	739	chrX	+	54249756	54250495	ATAGAGCTAGCTGTCTTCCTGCCTGCCCTGCATCATAAAATACAAAGGGAAGAGAAGACT	intronic antisense	NM_020922	WNK3	serine/threonine-protein kinase WNK3 isoform 1	-	54219255	54384438
ASHG19A3A041048	2954.09	2797.92	2851.43	1238.63	1845.22	1374.84	1597.29	11.3709	11.2906	11.3839	10.3654	10.9795	10.5306	10.6777	P	M	P	M	M	M	M	noncoding	ENST00000451120	RP3-390O13.1	Ensembl	739	chrX	+	54249756	54250495	ATAGAGCTAGCTGTCTTCCTGCCTGCCCTGCATCATAAAATACAAAGGGAAGAGAAGACT	intronic antisense	NM_001002838	WNK3	serine/threonine-protein kinase WNK3 isoform 2	-	54219255	54384438
ASHG19A3A044751	49.0275	53.4411	50.3838	56.2516	77.5862	61.3013	78.4067	5.75914	5.8943	5.83866	5.66581	6.2249	5.84548	6.11007	P	M	P	M	M	M	M	noncoding	ENST00000449749	AC068580.7	Ensembl	338	chr11	-	1798159	1799618	AAATGGCAGCGTTGTGGGTAAAATAACACCTCCTTCAGAGACATTGACATCCTCATCCCT	intergenic
ASHG19A3A024260	5	5.4341	5	57.719	53.7625	56.8674	62.2913	2.37766	2.43209	2.39437	5.70507	5.67415	5.73601	5.76465	A	A	A	M	M	M	M	noncoding	ENST00000514420	RP11-453E17.3	Ensembl	307	chr4	-	69049895	69051921	AGATTTTTCCACCTGGTGAAGGAGTTGTTGTTACAGGATGGGGAAGACTTTCATTTAATG	intergenic
ASHG19A3A025289	20.1203	17.2827	15.1494	43.7306	41.8148	45.951	54.327	4.49697	4.42613	4.18646	5.2918	5.29795	5.41909	5.55987	A	P	A	M	M	M	M	noncoding	ENST00000505494	RP11-61G19.1	Ensembl	640	chr4	+	10686626	10699285	AGTTCAGCAGTCCAACAAGAATGGCTTCTCATGCCAGAGTAGACTCTTCTTGTATTTAGG	bidirectional	NM_052964	CLNK	cytokine-dependent hematopoietic cell linker	-	10491837	10686386
ASHG19A3A025029	21.128	18.7288	26.0198	18.0056	15.616	19.4215	23.6003	4.56509	4.52567	4.9303	3.94005	3.80773	4.11448	4.289	A	P	P	M	M	M	M	noncoding	ENST00000512634	RP11-87F15.2	Ensembl	610	chr4	-	177229418	177241609	CCCACCAATTACATTTCTCCATTTTCAGTGTTCATTGAGCCATTGGATATAAATGTGAAT	natural antisense	NM_021928	SPCS3	signal peptidase complex subunit 3	+	177241089	177253396
ASHG19A3A046287	82971.5	79936.7	71645.1	75715.8	79380.9	75879.8	82402.7	16.0687	16.0839	15.9633	16.4509	16.4459	16.3881	16.4572	P	P	P	M	M	M	M	noncoding	ENST00000486306	RP11-313M3.1	Ensembl	515	chr11	+	39183002	39183517	TAAGGGATGATGTGCGGGTTCAGGAGGTGCCCAAACTGAAGGTTTGTGCGCTGCGCATGA	intergenic
ASHG19A3A055112	72.5469	51.9625	43.0789	127.292	172.787	181.472	170.709	6.31356	5.86092	5.62583	6.89176	7.42562	7.46952	7.28023	P	P	P	M	M	M	M	noncoding	uc001yed.1	CR611440	UCSC_knowngene	785	chr14	+	95625022	95646270	TAACAGACGAAGAAATGGAATAACTTCCAACAACACAGGTTGGAGCTGAAGGAGTGCCCA	intergenic
ASHG19A3A021553	72162.8	70084.3	55524	46483.4	47971.2	46897.9	47083.5	15.8672	15.8692	15.5755	15.732	15.7274	15.7039	15.6372	P	P	P	M	M	M	M	noncoding	ENST00000472521	RPS15AP16	Ensembl	361	chr3	-	128517683	128518044	TGGCATCATGGACCATGAAGAAAGAGATGAAAATACAGGAGGGAAAATCCTGGGATTCTT	intronic antisense	NM_004637	RAB7A	ras-related protein Rab-7a	+	128444978	128533641
ASHG19A3A021797	1898.21	1844.74	1768.52	508.014	575.858	536.521	635.106	10.7428	10.7118	10.7068	9.01421	9.24955	9.11137	9.28948	P	P	P	M	M	M	M	noncoding	AK097849		misc_RNA	1763	chr3	-	153990874	153992637	GGCATTACTGAGTAGAAAATACATTCCAGGTCTAAGAACTGTTTGTTCTTTAGTGGATTT	intergenic
ASHG19A3A024407	2060.49	1955.19	1813.83	2113.62	2157.38	2228.36	2153.26	10.8692	10.796	10.7423	11.1473	11.2116	11.2321	11.1142	P	P	P	M	M	M	M	noncoding	ENST00000503202	RP11-127B20.1	Ensembl	879	chr4	-	83322730	83323609	TAAAGATCCCGAGAGAAAGAGACTCTTCAGGAGGCATCAACTTCTAACTCATCTCACCAG	intergenic
ASHG19A3A014983	53.5678	54.8777	51.88	276.421	306.526	264.116	324.287	5.88087	5.93102	5.879	8.07005	8.29327	8.03909	8.25828	P	M	P	M	M	M	M	noncoding	ENST00000437273	AC007563.2	Ensembl	393	chr2	-	217670459	217670852	ACAAAAAAGCAGGGATGGAATGCATTATGAACAATGTCACCTGTACTCAGATCTGTGAAA	intergenic
ASHG19A3A042599	11745.4	12693.5	11030.4	15895.9	16290.6	16434.2	17418.6	13.3121	13.4409	13.275	14.1388	14.1934	14.1677	14.171	P	P	P	M	M	M	M	noncoding	uc001iwf.2	EPC1	UCSC_knowngene	919	chr10	-	32556714	32557633	GGCATACATTATCCTTAAGGTTTTTAATCCCACCTGGAAAAATTGTGATAGAATTCTCAC	intergenic
ASHG19A3L0003097	14.8676	17.1103	18.8943	21.3044	17.4277	21.8576	20.4003	4.06782	4.41451	4.48804	4.19735	3.97975	4.29699	4.05554	A	A	P	M	M	M	M	noncoding	chr5:73882471-73909894-	lincRNA-RGNEF-4	lincRNA	27424	chr5	-	73882471	73909894	CCAGAGCCTCATGAATTACCCATTGCATTCATGGAGAAAGCTGATTGCTTTCCCCTTTTT	intergenic
ASHG19A3L0003581	303.52	356.94	354.162	195.465	475.772	462.567	545.262	8.25954	8.47512	8.51205	7.53997	8.96375	8.88481	9.05516	P	P	P	M	M	M	M	noncoding	chr13:40809650-40814850+	lincRNA-FOXO1-1	lincRNA	5201	chr13	+	40809650	40814850	GTTCACAAGTCATAACATCAGAATCCAACTCAGACCTCCTCATTCCATGCTTTCTAATTT	intergenic
ASHG19A3A026744	1869.36	1946.54	1766.31	503.965	497.635	389.089	485.887	10.7224	10.7887	10.7043	9.00043	9.03402	8.61717	8.8787	P	P	P	M	M	M	M	noncoding	ENST00000507707	CTD-2265D6.1	Ensembl	932	chr5	-	42465501	42468970	TAGCAGATCTCACAACTGGGGAATTGTCAAAGATGAATTAACAGAGTCCCCCAAATACAT	intronic antisense	NM_000163	GHR	growth hormone receptor isoform 1 precursor	+	42424025	42721926
CUST_416_PI426073487	114.126	142.768	105.84	35.4114	44.5929	43.8468	51.4114	6.93551	7.2386	6.86533	4.97216	5.39442	5.34806	5.47548	P	P	P	M	M	M	M	noncoding	uc.418+	uc.418	UCR	217	chr17	+	56082227	56082444	CAAAGCATTCTTAATCCATCTCTTCAGATATGTCTACAGAAAGACACATGAAAAGCAAGA	natural antisense	NM_001078166	SRSF1	serine/arginine-rich splicing factor 1 isoform	-	56078279	56084707
CUST_416_PI426073487	114.126	142.768	105.84	35.4114	44.5929	43.8468	51.4114	6.93551	7.2386	6.86533	4.97216	5.39442	5.34806	5.47548	P	P	P	M	M	M	M	noncoding	uc.418+	uc.418	UCR	217	chr17	+	56082227	56082444	CAAAGCATTCTTAATCCATCTCTTCAGATATGTCTACAGAAAGACACATGAAAAGCAAGA	natural antisense	NM_006924	SRSF1	serine/arginine-rich splicing factor 1 isoform	-	56078279	56084707
ASHG19A3A031389	97.7969	101.595	86.9642	212.31	201.164	213.655	232.196	6.72716	6.77488	6.59983	7.66172	7.65685	7.71438	7.75009	P	P	P	M	M	M	M	noncoding	ENST00000429998	RP11-513I15.6	Ensembl	4785	chr6	+	34247481	34252266	GCCCTTGATATTAGAGAATATTAAAATCACACAGTTGTGGCAAAAATCACATTGTGGCTA	intergenic
ASHG19A3A032510	128.364	173.53	128.048	219.92	197.631	232.03	230.848	7.09472	7.50122	7.12482	7.71645	7.63018	7.84195	7.74137	P	P	P	M	M	M	M	noncoding	ENST00000451792	AC017060.1	Ensembl	442	chr7	-	17503068	17598533	AATTATTTCTGAACCTTCCCATCAGCCTTGTCTCTGATAGAATTGGCCTGTTGTGGACGG	intergenic
ASHG19A3A009156	1485.16	1804.78	1405.13	2055.05	2246.71	2156.75	2322.87	10.3973	10.6786	10.3815	11.0998	11.2693	11.1812	11.2261	P	P	P	M	M	M	M	noncoding	NR_002211	MEIS3P1	RefSeq_NR	2872	chr17	+	15690163	15693017	GGTAGGCAAAGAAACAAGTCTGGTTATTTATGTAAAAACTAGTCTAATAAAGTGAGTGGC	intergenic
ASHG19A3A048159	112.479	156.327	123.913	88.4582	135.546	172.57	169.86	6.91569	7.35983	7.08189	6.35646	7.05863	7.39287	7.27246	P	P	P	M	M	M	M	noncoding	AK057203		misc_RNA	1705	chr12	-	128255393	128295208	GCAGGACCTAATTGGCCTAGCTTTCTTGTTTCCCCCAATAATATATTTTTAGAACGGTTT	intergenic
ASHG19A3A044660	76.4557	92.2147	71.1165	122.344	118.566	163.423	149.955	6.38924	6.64318	6.31287	6.8344	6.85785	7.31171	7.09033	P	P	P	M	M	M	M	noncoding	uc001lkl.2	CR592586	UCSC_knowngene	870	chr10	+	131910185	131919004	TGTGGCCCAATTCCAGTTCTCCAGGGTGCTCATCACTCTGTGGCAGTTTGTCTTCTGGTT	intergenic
ASHG19A3A040393	23.2664	7.62597	29.1426	58.8997	21.3966	22.4152	53.8661	4.71061	3.48441	5.08762	5.73905	4.29657	4.33653	5.54792	A	M	P	P	M	M	M	noncoding	uc004evu.2	BC043223	UCSC_knowngene	1643	chrX	-	129611045	129658231	AAATGGCTCAGACTTTCAGGAAGCTTCCCCATCTTACTGCTTCTTTTCCAAAGATGGCGT	intergenic
ASHG19A3L0003241	494.664	495.923	297.416	340.789	303.833	365.16	300.473	8.91131	8.91415	8.27081	8.39213	8.28017	8.51804	8.14781	P	P	P	P	M	M	M	noncoding	BI763082	lincRNA-TBC1D22A	lincRNA	830	chr22	+	47154429	47287216	TTACCTTCCCCGCCAATGTAGACCGGAGACCAGCCACTCTCCAGAGAAACCACAAATGAA	exon sense-overlapping	NM_014346	TBC1D22A	TBC1 domain family member 22A	+	47158517	47571342
ASHG19A3A022965	24.7992	21.4903	14.571	30.9914	49.3171	52.277	70.2572	4.80042	4.69536	4.1247	4.77244	5.54316	5.60809	5.94405	A	M	A	P	M	M	M	noncoding	uc003dwj.2	BC042024	UCSC_knowngene	1486	chr3	+	107149776	107182758	GAGCTCACCAATAAGCAAAACAGCCAAGCCTTTTGAAGACTAATTAGAAAAAGTACAATA	intergenic
ASHG19A3A019320	28.0663	23.5765	18.5973	18.3313	13.2455	17.3806	22.0548	4.97324	4.81275	4.46635	3.96835	3.5343	3.93898	4.1822	A	M	P	P	A	M	M	noncoding	BC043405		misc_RNA	2017	chr21	+	44907688	44909690	AGAAAATCTTAAACAAATAAACCAACAAAAGGAGTGACACACGGAGCTCCTGGCCGGGGT	intergenic
ASHG19A3A027953	151.41	157.942	130.918	131.627	105.613	94.4885	77.9194	7.31712	7.37246	7.15767	6.93891	6.68208	6.48597	6.102	P	M	P	P	M	M	M	noncoding	AF009267		NRED	1356	chr5	+	10363293	10364634	AACTACTGATAGTGTGGCAGGAGCTAGAAAACACCCCTTTCTTCTTAGATATCCCTCCAG	intron sense-overlapping	NM_005885	41339	E3 ubiquitin-protein ligase MARCH6	+	10353827	10435491
ASHG19A3A025427	5	6.01145	8.08755	31.7841	36.3836	27.827	35.2552	2.37766	3.18742	3.3347	4.81353	5.08706	4.66505	4.9075	A	A	A	P	M	M	M	noncoding	NR_024604	CLCA3P	RefSeq_NR	3412	chr1	+	87099958	87121058	CTAGGCCCGAAATGACTAGCAAATATCATTTTCTGTATGAATTGTGGAACATCACAATAA	intergenic
ASHG19A3A014587	1342.76	1335.87	1208.9	1438.03	1627.1	1675.22	1617.02	10.2606	10.2561	10.1691	10.5915	10.7991	10.8118	10.6956	P	M	P	P	M	M	M	noncoding	ENST00000397819	AC017070.1	Ensembl	2403	chr2	-	168570172	168572575	ACTTTCATCCAAGACCTGGATTTTACCCCAACCCCACATTCTGAAGGTAGAAGCAAGTTC	intergenic
ASHG19A3A034058	2314.16	2099.48	2015.21	33.5325	43.0808	36.8198	45.3275	11.0339	10.9065	10.8934	4.88905	5.3411	5.08706	5.28655	P	M	P	P	M	M	M	noncoding	ENST00000436576	AC079780.3	Ensembl	411	chr7	+	23514414	23520578	AAGGGAAGACTTCCTGTCCCAAAGGAAGTGAACTACAAGAAGAACGATGAGACAAACGCT	intergenic
ASHG19A3A038476	347.447	342.976	281.682	3297.38	4186.12	4219.76	4111.36	8.44729	8.42265	8.19488	11.7931	12.1748	12.1632	12.0494	P	P	P	P	M	M	M	noncoding	ENST00000452496	ASS1P12	Ensembl	1227	chr9	+	32945993	32947220	TTGAAATTTGCTGAGCTGGTGTATACCGGTTTCTGGCATAGCCCTGAGTGTGAATTTGTC	intergenic
ASHG19A3A034944	4762.59	5023.38	4034.96	5888.91	1376.18	1290.82	1361.75	12.0562	12.1408	11.8745	12.6531	10.5599	10.4382	10.4528	P	P	P	P	M	M	M	noncoding	BM413624		RNAdb	912	chr7	+	116594292	116608625	ATTTCTGAGGGTTTCGGTTGCAGTTTTCAGTGATCTTTGCTCGTCTCCCTTCCCTGTAAA	intron sense-overlapping	NM_021908	ST7	suppressor of tumorigenicity 7 protein isoform	+	116593380	116863961
ASHG19A3A034944	4762.59	5023.38	4034.96	5888.91	1376.18	1290.82	1361.75	12.0562	12.1408	11.8745	12.6531	10.5599	10.4382	10.4528	P	P	P	P	M	M	M	noncoding	BM413624		RNAdb	912	chr7	+	116594292	116608625	ATTTCTGAGGGTTTCGGTTGCAGTTTTCAGTGATCTTTGCTCGTCTCCCTTCCCTGTAAA	intron sense-overlapping	NM_018412	ST7	suppressor of tumorigenicity 7 protein isoform	+	116593380	116870075
ASHG19A3A046293	155.024	136.077	134.054	93.5391	80.9275	70.9438	81.3355	7.35089	7.17086	7.18948	6.43783	6.28801	6.07116	6.16817	P	P	P	P	M	M	M	noncoding	ENST00000395705	AC023085.1	Ensembl	1281	chr11	+	43543525	43544817	AGGCCCTGAGAGTGATCGTGTGGATAGACAGTGGCAACGACAACGTGGACATCAAGGCTG	intergenic
ASHG19A3A052560	5	5.81103	5	29.148	22.7183	27.3989	30.0888	2.37766	3.01615	2.39437	4.68146	4.38081	4.63951	4.66221	A	A	A	P	M	M	M	noncoding	NR_021493	LOC100144604	RefSeq_NR	1762	chr15	-	93111047	93115493	AAGCAGATGGTTGGTGGTGGAAACGTCACCTCAGTATAGTACTATGGAGTTTCCTTTCAC	intergenic
ASHG19A3A043788	14580.2	12136.2	11575.9	3225.89	2920.52	1294.18	2928.89	13.6083	13.3639	13.3477	11.7644	11.6571	10.4425	11.5712	P	P	P	P	M	M	M	noncoding	ENST00000418077	RP11-490O24.1	Ensembl	411	chr10	+	34153240	34153651	GCGGCAGTGGTCATTTGACAACAAAAGTCATACCGGAGAAAATATAACATTTAAAAAGAA	intergenic
ASHG19A3A019269	8.72642	6.81538	6.16042	22.0651	19.6401	22.458	31.0505	3.33139	3.36675	3.01411	4.25208	4.16464	4.34077	4.71206	A	A	A	P	M	M	M	noncoding	uc002yyn.1	CR624487	UCSC_knowngene	1542	chr21	+	41099681	41102607	AACAATAACATCCAGGGAGTTCGTTTCTTGAGCAACGACCAGCTCTTTGCATAGCACGAA	intergenic
ASHG19A3A014564	736.583	693.568	585.515	195.265	195.386	148.35	194.82	9.44121	9.36281	9.17858	7.53883	7.61027	7.16424	7.48717	P	P	P	P	P	M	M	noncoding	AL080107		NRED	1583	chr2	-	163163606	163164969	CTCGTTGTGTCCATATTAAAATTAAAAGTACCTTGCCATAACAAAAGCACATTCTAAGCC	intron sense-overlapping	NM_022168	IFIH1	interferon-induced helicase C domain-containing	-	163123588	163175039
ASHG19A3A036603	4961.04	4883.49	4488.93	3755.41	4173.44	4038.94	4154.7	12.1039	12.1009	12.0343	11.9835	12.1722	12.0956	12.0699	P	M	P	P	P	M	M	noncoding	AF293366		misc_RNA	860	chr8	+	52730142	52730969	TATCCTTAACAAAAACTCTCTCCTGCATAGTAAAAGCATCATCTAAACAGCAGCTCCAAC	natural antisense	NM_052937	PCMTD1	protein-L-isoaspartate O-methyltransferase	-	52730139	52811735
ASHG19A3A022326	38.5531	24.2821	38.7606	57.3785	52.1593	53.5641	75.0731	5.41675	4.85067	5.48021	5.69561	5.6282	5.64987	6.04606	A	P	P	P	M	M	M	noncoding	G42949		misc_RNA	144	chr3	+	16299498	16299642	CCAAGAAAAATGTTTCTGAATGTGCACACTAGAATATATGCAGAATCCTTTAAACAGTCG	natural antisense	NM_001047434	DPH3	DPH3 homolog isoform 2	-	16298567	16306496
ASHG19A3A022326	38.5531	24.2821	38.7606	57.3785	52.1593	53.5641	75.0731	5.41675	4.85067	5.48021	5.69561	5.6282	5.64987	6.04606	A	P	P	P	M	M	M	noncoding	G42949		misc_RNA	144	chr3	+	16299498	16299642	CCAAGAAAAATGTTTCTGAATGTGCACACTAGAATATATGCAGAATCCTTTAAACAGTCG	natural antisense	NM_206831	DPH3	DPH3 homolog isoform 1	-	16298567	16306496
ASHG19A3A042075	17.1956	12.7027	15.374	30.2829	27.0561	32.35	26.6257	4.26415	4.05204	4.20723	4.73829	4.64184	4.89113	4.47202	A	A	A	P	M	M	M	noncoding	ENST00000430400	AC134882.1	Ensembl	366	chrY	+	13488063	13488429	TCGACATTCCGGAGCCCAGAGTCCAGATTTGGTTTCAGAATGCGAGGTCACGCCAGCTGA	intergenic
ASHG19A3A034043	235.839	217.227	201.354	119.624	67.4674	70.8648	66.0125	7.92108	7.80487	7.74103	6.79526	6.02053	6.06897	5.85089	P	P	P	P	M	M	M	noncoding	ENST00000439823	AC002480.4	Ensembl	557	chr7	+	22629323	22631241	CAGTTCCTATGATATGACTACCTCAGGGCAAGAAAGTCACTGTGTCCCTGCTACAACAAA	intergenic
ASHG19A3A050044	66.4116	61.4393	53.548	104.95	42.3443	34.0588	40.2169	6.18522	6.08319	5.92108	6.60496	5.31658	4.96819	5.10607	P	P	P	M	M	M	M	noncoding	ENST00000424853	RP11-363P13.1	Ensembl	546	chr13	+	33851689	33855471	AATTAGCTACATTAATGTTAGAACCATTTGGACCTCACCCAGGACTTCAACTACATTATG	intronic antisense	NM_178006	STARD13	stAR-related lipid transfer protein 13 isoform	-	33677271	33859901
ASHG19A3A041661	598.691	559.749	534.335	145.944	174.311	170.894	138.517	9.17131	9.07227	9.05393	7.09518	7.44046	7.37732	6.9697	P	P	P	P	M	M	M	noncoding	ENST00000316861	AC002368.2	Ensembl	735	chrX	+	147546209	147546948	GAGCAGAGGAAAGGAAAAGGGCTCAGGTTTAAGCAACTGGAGTCATTCCTACATGATTGT	intergenic
ASHG19A3A028651	229.343	219.995	177.771	100.917	196.3	199.38	206.099	7.883	7.82185	7.57465	6.54501	7.61708	7.60865	7.57276	P	P	P	P	M	M	M	noncoding	G43610		misc_RNA	101	chr5	+	114856635	114856736	TTATTAGCTGGCATCCGAATACAGTACTTCTTTTGAAAAAATACACAATGGGAACTGACA	natural antisense	NM_020177	FEM1C	protein fem-1 homolog C	-	114856607	114880591
ASHG19A3A050303	26.6712	24.3543	21.1117	36.7373	19.4835	12.3537	29.099	4.90809	4.85439	4.64066	5.0255	4.15617	3.38896	4.61275	A	P	P	P	M	A	M	noncoding	ENST00000434832	RP11-159J2.2	Ensembl	387	chr13	+	75824615	75826148	CCACCGTGCTCTGCTGGACATCATTTAGCATATATGACAAGGTAACTGACGAAGGACAAT	intergenic
ASHG19A3L0000403	52.5256	48.5839	39.995	75.2386	46.0715	32.0475	86.7401	5.85148	5.76884	5.52098	6.10929	5.44463	4.87634	6.25938	P	P	P	M	M	M	M	noncoding	AI376773	lincRNA-P2RY2	lincRNA	495	chr11	+	72876689	72877184	AGTCTTGTTCAGGGTCAGGGTGATGGCCTTTCCTATGCTAGATCACAGCCTTATATATCA	intergenic
ASHG19A3A033737	21.1527	14.1197	14.7514	32.657	28.2385	21.1596	31.4743	4.56688	4.17571	4.14517	4.85117	4.70984	4.24742	4.73353	A	P	A	M	M	M	M	noncoding	ENST00000492517	RP11-632K21.1	Ensembl	345	chr7	-	150238841	150239186	TTTACTTGTATCATCAACTATGGTAAGGATCTTCCTCTGGTGAAAGGAATCAAGTTTCAG	intergenic
ASHG19A3A039769	807.529	749.866	734.559	381.696	459.477	436.169	405.886	9.56315	9.47339	9.49114	8.56141	8.91026	8.79204	8.59806	P	P	P	M	M	M	M	noncoding	ENST00000451718	RP1-169I5.4	Ensembl	390	chrX	-	41331516	41331906	AGAGGTTCTTGAAATCCAGGAGTGTTCCATAGCTCAAGAATCCTTGGAATCCCAGAAGCA	intronic antisense	NM_022567	NYX	nyctalopin precursor	+	41306712	41334905
ASHG19A3A022140	11677.7	11604.8	10212.3	10413.1	10467.7	11350.6	12030.7	13.3046	13.3064	13.1772	13.5069	13.5369	13.6278	13.6393	P	P	P	M	M	M	M	noncoding	uc003fwf.1	AF088041	UCSC_knowngene	3546	chr3	-	195961239	195964785	TGTTCTGAGTTATTTTGGATTTTGTTCTTTAGCCAAATAAAGGCAGTGTGGTTTTACCTG	intergenic
ASHG19A3A011295	154.613	127.738	124.678	97.1026	131.262	125.196	149.281	7.34674	7.08598	7.09013	6.49116	7.01153	6.91067	7.08412	P	P	P	M	M	M	M	noncoding	ENST00000502686	AC139769.2	Ensembl	2291	chr19	-	24000400	24057503	TGCAAGGCCTGCTTTAGTTTGATAAATTCATGTTTCCCTTCCAGTGAAGCTGCAAGGTCA	intergenic
ASHG19A3A015386	10.1381	9.64446	9.00925	17.3927	22.301	15.0607	27.6137	3.54655	3.73201	3.47751	3.88544	4.35204	3.71116	4.52556	A	A	A	M	M	M	M	noncoding	AK057246		misc_RNA	2055	chr2	+	23604255	23606310	CTTCTTTTTGCATTGGGTTGACCTGTGTATCAATTTGAAATCCCAAGAAATCCCTCTTTT	intergenic
ASHG19A3A016821	122.017	91.9898	108.495	83.57	165.371	72.0774	205.161	7.02673	6.64005	6.90062	6.27086	7.36103	6.09552	7.56382	P	P	P	M	M	M	M	noncoding	ENST00000454456	AC007163.9	Ensembl	754	chr2	+	202417581	202418335	TAACAGGCTTCCAATGACTACATGTAATTATCAGCTCCAACTTCCTTATCCTTTTCTTCT	intronic antisense	NM_001168221	ALS2CR11	amyotrophic lateral sclerosis 2 chromosomal	-	202352143	202483905
ASHG19A3A016821	122.017	91.9898	108.495	83.57	165.371	72.0774	205.161	7.02673	6.64005	6.90062	6.27086	7.36103	6.09552	7.56382	P	P	P	M	M	M	M	noncoding	ENST00000454456	AC007163.9	Ensembl	754	chr2	+	202417581	202418335	TAACAGGCTTCCAATGACTACATGTAATTATCAGCTCCAACTTCCTTATCCTTTTCTTCT	intronic antisense	NM_152525	ALS2CR11	amyotrophic lateral sclerosis 2 chromosomal	-	202352143	202483905
ASHG19A3A016821	122.017	91.9898	108.495	83.57	165.371	72.0774	205.161	7.02673	6.64005	6.90062	6.27086	7.36103	6.09552	7.56382	P	P	P	M	M	M	M	noncoding	ENST00000454456	AC007163.9	Ensembl	754	chr2	+	202417581	202418335	TAACAGGCTTCCAATGACTACATGTAATTATCAGCTCCAACTTCCTTATCCTTTTCTTCT	intronic antisense	NM_001168217	ALS2CR11	amyotrophic lateral sclerosis 2 chromosomal	-	202399042	202483905
ASHG19A3A016821	122.017	91.9898	108.495	83.57	165.371	72.0774	205.161	7.02673	6.64005	6.90062	6.27086	7.36103	6.09552	7.56382	P	P	P	M	M	M	M	noncoding	ENST00000454456	AC007163.9	Ensembl	754	chr2	+	202417581	202418335	TAACAGGCTTCCAATGACTACATGTAATTATCAGCTCCAACTTCCTTATCCTTTTCTTCT	intronic antisense	NM_001168216	ALS2CR11	amyotrophic lateral sclerosis 2 chromosomal	-	202352143	202483905
ASHG19A3A050435	58.0871	59.5021	40.3114	36.8875	24.9592	31.1489	24.2147	5.99363	6.03935	5.53375	5.0314	4.5183	4.83379	4.33035	P	P	P	M	M	M	M	noncoding	ENST00000400214	RP11-397O8.3	Ensembl	611	chr13	+	102454227	102454838	AAGGACGTTGCTGACAGTAAGTGTAAAGGAGAGTTTGATGGCTCAAAGCACCCCACTAAA	intronic antisense	NM_175929	FGF14	fibroblast growth factor 14 isoform 1B	-	102373204	103054124
ASHG19A3A050435	58.0871	59.5021	40.3114	36.8875	24.9592	31.1489	24.2147	5.99363	6.03935	5.53375	5.0314	4.5183	4.83379	4.33035	P	P	P	M	M	M	M	noncoding	ENST00000400214	RP11-397O8.3	Ensembl	611	chr13	+	102454227	102454838	AAGGACGTTGCTGACAGTAAGTGTAAAGGAGAGTTTGATGGCTCAAAGCACCCCACTAAA	intronic antisense	NM_004115	FGF14	fibroblast growth factor 14 isoform 1A	-	102373204	102568995
ASHG19A3A048298	83.9972	73.5992	73.0957	79.4067	144.257	166.924	174.021	6.51683	6.32926	6.35451	6.19426	7.15401	7.34123	7.3089	P	P	P	M	M	M	M	noncoding	ENST00000433544	RP11-488P3.1	Ensembl	1671	chr1	-	94218479	94241000	TCTGTGAGATATCAAATAGAGAGGTGAAGCCTGCAGTAATAAAAAATACTGCCATAGCTA	intergenic
ASHG19A3A043972	218.376	156.222	213.477	174.53	293.348	187.168	332.393	7.81417	7.35879	7.81726	7.36669	8.22842	7.51657	8.29765	P	P	P	M	M	M	M	noncoding	ENST00000435086	RP11-448K10.1	Ensembl	1884	chr10	+	59715054	59716938	TATGTGGAAGTACCCCCTTTGAACCATCCAGCCTTCACTTTTCGTGAACCATGTACAATG	intergenic
ASHG19A3A054041	375.945	307.79	336.109	461.508	451.929	306.915	519.847	8.55432	8.26843	8.44058	8.85981	8.88066	8.26772	8.97931	P	P	P	M	M	M	M	noncoding	CR621785		NRED	2373	chr16	-	87360621	87362994	ACTGGACTCCTCATCCCCGTAATTATTTAGAGAAGATGCAAGCAGCAGATAGTCTCCATG	exon sense-overlapping	NM_024735	FBXO31	F-box only protein 31	-	87362941	87417394
ASHG19A3A039054	43.8492	50.3109	31.354	23.1948	41.9979	25.4384	62.8945	5.59979	5.8162	5.18525	4.33114	5.30385	4.52855	5.78008	P	P	P	M	M	M	M	noncoding	ENST00000429577	RP11-341A22.1	Ensembl	183	chr9	+	105827697	105827880	CCCCGCCTAAACCTAGTCATAAGCCAAAATCTAGTTTCACTTTTACTAGATTTAATTTGA	intergenic
ASHG19A3A050999	7.94647	5.48155	5	47.1972	50.4276	44.3892	76.0754	3.19954	2.52095	2.39437	5.40555	5.57759	5.36656	6.06608	A	A	A	M	M	M	M	noncoding	uc001xsz.2	BC038792	UCSC_knowngene	364	chr14	-	77514515	77547598	TGAAGTTATGAAGAGATAGTTACTGGATCAAAATAGAAGAAATGATGCCTGGCAGCTAGA	intergenic
ASHG19A3A009121	138.848	109.802	146.953	35.3091	173.345	75.6102	190.63	7.2017	6.87904	7.31553	4.96884	7.43089	6.1574	7.44992	P	P	P	M	M	M	M	noncoding	ENST00000437556	RP11-467I21.1	Ensembl	391	chr1	-	193726006	193726397	TGCCATTACCAAGTCCCCCTGACCACTGAATTAGCTATGAAGAAGAAAGAAGACAACACA	intergenic
ASHG19A3A034168	18.8814	16.6695	7.8021	20.8154	18.5373	7.92108	20.6006	4.40528	4.38021	3.28631	4.16276	4.07918	2.75558	4.07063	A	P	A	M	M	A	M	noncoding	uc003tda.1	DPY19L1P2	UCSC_knowngene	1166	chr7	+	32865913	32878356	ACAAATCCTTTAAGTCTTCACAGGGCAGGAAAGCGACAACTTTGGGGGCTATCTTCTCTA	intergenic
ASHG19A3A043074	85.5486	85.5141	72.8796	48.1783	97.0519	60.7515	115.803	6.54164	6.53405	6.34981	5.43306	6.55612	5.83165	6.69759	P	P	P	M	M	M	M	noncoding	ENST00000439659	RP11-380G5.4	Ensembl	713	chr10	-	89807891	89809580	CCTCAAAGAACATCCCCCACACAATGAACACTGAAGGCTTCCTGAGAAATAGGCAAAAAC	intergenic
ASHG19A3A038583	54928.8	52239.9	47587.7	15778.9	23373.7	23099.2	25419.8	15.4873	15.4484	15.3636	14.1282	14.7109	14.6499	14.734	P	P	P	M	M	M	M	noncoding	ENST00000432323	RP11-576D8.1	Ensembl	225	chr1	+	205320374	205320599	CAATATTGGAATGGTGGTAATATGAGGAAATAGTATCATCATGTTAGAAGCCTTGGAATG	intronic antisense	NM_018203	KLHDC8A	kelch domain-containing protein 8A	-	205305647	205326039
ASHG19A3A029793	82.421	68.2785	80.1014	75.8428	103.688	68.2855	119.497	6.49181	6.22834	6.48476	6.12232	6.65646	6.00946	6.74669	P	P	P	M	M	M	M	noncoding	ENST00000501646	AL662799.2	Ensembl	1912	chr6	-	33395516	33421465	AAAGGAAGAGAAGGTCTCTGATGCTGGGTGGGCTAGTGGTCTGCGGTGTTTCGGAACTCG	natural antisense	NM_006772	SYNGAP1	ras GTPase-activating protein SynGAP	+	33387846	33421466
ASHG19A3A029793	82.421	68.2785	80.1014	75.8428	103.688	68.2855	119.497	6.49181	6.22834	6.48476	6.12232	6.65646	6.00946	6.74669	P	P	P	M	M	M	M	noncoding	ENST00000501646	AL662799.2	Ensembl	1912	chr6	-	33395516	33421465	AAAGGAAGAGAAGGTCTCTGATGCTGGGTGGGCTAGTGGTCTGCGGTGTTTCGGAACTCG	bidirectional	NM_152735	ZBTB9	zinc finger and BTB domain-containing protein 9	+	33422355	33425320
ASHG19A3A052934	102220	106297	94577	70003.6	102928	101980	103567	16.3502	16.4572	16.3502	16.3377	16.8076	16.767	16.7783	P	P	P	M	M	M	M	noncoding	ENST00000465295	RP11-30K9.1	Ensembl	476	chr15	+	59161857	59162333	TTTGTGAGAACCAATGGGAAGGAGTCTGAGCTGCTGGAACCTCTTCCCTACAAATTCATA	intergenic
ASHG19A3A024167	30.2689	26.2303	27.529	46.9971	45.0708	36.7848	53.9092	5.07972	4.94996	5.00665	5.39947	5.4124	5.08525	5.54909	A	P	P	M	M	M	M	noncoding	ENST00000504529	RP11-241F15.5	Ensembl	206	chr4	-	49525688	49525894	AATGCCTGGCTTGGCTGCAGCCACTGGGACACGTGGCCCTGCTTCTGTGATGCTAGGAGT	intergenic
ASHG19A3A020643	192.55	179.732	186.519	404.318	871.577	588.098	967.374	7.65129	7.54823	7.6392	8.65129	9.87372	9.25077	9.93152	P	P	P	M	M	M	M	noncoding	ENST00000447256	RP11-176P14.1	Ensembl	426	chr3	-	2152092	2185925	ATTGTGAACTTCATGGCAATTGCTCCAGTCCCACCTGCTCCAGATACCTAAATCATGAAG	intronic antisense	NM_175607	CNTN4	contactin-4 isoform a precursor	+	2140549	3099645
ASHG19A3L0003536	649.912	598.284	409.352	41.2014	85.2099	13.9239	104.163	9.2822	9.16177	8.71119	5.20015	6.36322	3.57864	6.53242	P	P	P	M	M	M	M	noncoding	BE244504	lincRNA-FAM110A	lincRNA	447	chr20	-	837118	837565	GTGCTGTGTGTGTGGAAACCCAAATATGACCGTAGAGGGTGGAGCCACAAAACCAAGCTG	intergenic
ASHG19A3A027940	142.038	155.418	127.342	42.6469	34.4703	34.3462	28.9464	7.23384	7.35334	7.11744	5.24947	5.00779	4.97906	4.60472	P	P	P	M	M	M	M	noncoding	ENST00000508179	CTD-2001E22.2	Ensembl	1799	chr5	+	9546311	9550721	CCAGGGTGTTATTTTCCGACATTGAGTCTTGTATATATCTTGAATGTCTATAAGCAAAGA	bidirectional	NM_003966	SEMA5A	semaphorin-5A precursor	-	9035137	9546233
ASHG19A3A029630	18.0013	15.3057	11.8738	183.677	198.781	134.046	213.458	4.33586	4.27361	3.84998	7.4504	7.63907	7.01126	7.62309	A	A	A	M	M	M	M	noncoding	ENST00000458236	DAQB-335A13.8	Ensembl	2835	chr6	-	29702804	29716770	GGTTTAAAAGAAAATGCCCATTGACTAATGAATGAATAAACAACATGTAGTGTATTTCTA	intergenic
ASHG19A3A053524	3163.4	3511.56	3429.07	814.073	1158.67	1251.74	1091.1	11.4702	11.6215	11.6484	9.73144	10.2981	10.3928	10.1135	P	P	P	M	M	M	M	noncoding	ENST00000400791	RP11-517A5.1	Ensembl	559	chr16	-	16187889	16189066	GAAAACACCACAGAATCATGCAGATCAAGAGGTTCAAATCTTCGTGTTCACCTTAAGAAC	intronic antisense	NM_004996	ABCC1	multidrug resistance-associated protein 1	+	16043433	16236930
ASHG19A3A053524	3163.4	3511.56	3429.07	814.073	1158.67	1251.74	1091.1	11.4702	11.6215	11.6484	9.73144	10.2981	10.3928	10.1135	P	P	P	M	M	M	M	noncoding	ENST00000400791	RP11-517A5.1	Ensembl	559	chr16	-	16187889	16189066	GAAAACACCACAGAATCATGCAGATCAAGAGGTTCAAATCTTCGTGTTCACCTTAAGAAC	intronic antisense	NM_019899	ABCC1	multidrug resistance-associated protein 1	+	16043433	16236930
ASHG19A3A053524	3163.4	3511.56	3429.07	814.073	1158.67	1251.74	1091.1	11.4702	11.6215	11.6484	9.73144	10.2981	10.3928	10.1135	P	P	P	M	M	M	M	noncoding	ENST00000400791	RP11-517A5.1	Ensembl	559	chr16	-	16187889	16189066	GAAAACACCACAGAATCATGCAGATCAAGAGGTTCAAATCTTCGTGTTCACCTTAAGAAC	intronic antisense	NM_019898	ABCC1	multidrug resistance-associated protein 1	+	16043433	16236930
ASHG19A3A053524	3163.4	3511.56	3429.07	814.073	1158.67	1251.74	1091.1	11.4702	11.6215	11.6484	9.73144	10.2981	10.3928	10.1135	P	P	P	M	M	M	M	noncoding	ENST00000400791	RP11-517A5.1	Ensembl	559	chr16	-	16187889	16189066	GAAAACACCACAGAATCATGCAGATCAAGAGGTTCAAATCTTCGTGTTCACCTTAAGAAC	intronic antisense	NM_019900	ABCC1	multidrug resistance-associated protein 1	+	16043433	16236930
ASHG19A3A053524	3163.4	3511.56	3429.07	814.073	1158.67	1251.74	1091.1	11.4702	11.6215	11.6484	9.73144	10.2981	10.3928	10.1135	P	P	P	M	M	M	M	noncoding	ENST00000400791	RP11-517A5.1	Ensembl	559	chr16	-	16187889	16189066	GAAAACACCACAGAATCATGCAGATCAAGAGGTTCAAATCTTCGTGTTCACCTTAAGAAC	intronic antisense	NM_019862	ABCC1	multidrug resistance-associated protein 1	+	16043433	16236930
ASHG19A3A026824	113.335	131.69	109.418	78.6022	66.8905	79.2942	80.8071	6.92522	7.12816	6.91305	6.17841	6.00666	6.22544	6.15915	P	P	P	M	M	M	M	noncoding	ENST00000510053	CTD-2516K3.3	Ensembl	2025	chr5	-	56613815	56615847	TAATTAAATCCCAAAAGGACCCAGACATGGCAATAGAGATTTGTGCTATGGATACTGTCG	intergenic
CUST_171_PI426073487	1733.76	1834.61	1795.62	198.031	221.524	170.699	271.904	10.6088	10.7018	10.7276	7.56084	7.80087	7.37605	7.99585	P	P	P	M	M	M	M	noncoding	uc.173+	uc.173	UCR	276	chr5	+	133726159	133726435	AATTCTTTAGATTTTTAAATTGGAGAAAAGCACTTAAAGTTTTTTATATATGAATATTAC	exon sense-overlapping	NM_003337	UBE2B	ubiquitin-conjugating enzyme E2 B	+	133706869	133727799
ASHG19A3H0000081	2445.51	3475.54	2657.71	940.577	2210.09	2002.56	2390.36	11.1108	11.6066	11.2815	9.95724	11.2461	11.0702	11.2749	P	P	P	M	M	M	M	noncoding	nc-HOXA1-53-	nc-HOXA1-53	HOX cluster	138	chr7	-	27135887	27136025	GCCCTCTTCCCTTCTCACCTCTCGCCAGTTCATCTTTCATTGAACGGTGGGGAGGGGGCG	intergenic
ASHG19A3A022999	13.9015	23.8563	11.1597	20.8931	29.9193	44.9201	33.5501	3.97226	4.82801	3.77037	4.16822	4.79679	5.38554	4.82846	A	A	A	M	M	M	M	noncoding	uc003dyv.2	BC041484	UCSC_knowngene	1055	chr3	+	112021324	112051596	ACTTCATTTGAGACAGCCTCACATGGAGAATGCAATGAGCCATTCTCTTCTCACATACAG	intergenic
ASHG19A3A038386	253.303	332.366	232.543	194.61	346.648	421.022	438.026	8.01196	8.379	7.92368	7.53342	8.47557	8.73854	8.71183	P	P	P	M	M	M	M	noncoding	uc001hap.2	BC038769	UCSC_knowngene	1124	chr1	+	204110535	204112135	AATGAAGAGCATGCTTGCTTTGTGGCTCCCCATTGACTCATCCCTTCTACCTTGAGTTAT	natural antisense	NM_018208	ETNK2	ethanolamine kinase 2	-	204100189	204121307
ASHG19A3A045357	239.952	170.841	183.968	376.004	203.097	266.758	236.609	7.9416	7.47894	7.62126	8.53978	7.66954	8.05517	7.78128	P	M	P	P	M	M	M	noncoding	uc001ody.2	AF113016	UCSC_knowngene	4135	chr11	-	65266958	65271093	ATTGGTTCTGGTCTACGTAAACACCCTCATCTTCTCAAGCTTTACCTTCTAACTTCTGCA	intergenic
ASHG19A3A032073	54.7318	49.8784	42.4808	76.1294	41.1679	60.8664	50.3204	5.91177	5.80419	5.6061	6.12745	5.27601	5.83499	5.44318	P	M	P	P	M	M	M	noncoding	AY927639		RNAdb	1483	chr6	+	132319845	132321331	ATCTTTCTTTAGCTGAAAAAAGCTGACCTAAACTCCATAACCACTCCCAAGAGCTTGAGG	intergenic
ASHG19A3A050965	16456.3	16277.5	11773.9	9820.65	10431.1	10180.9	9628.73	13.7806	13.7852	13.3719	13.4215	13.5277	13.4591	13.3121	P	P	P	P	M	M	M	noncoding	ENST00000315233	RP5-919J22.1	Ensembl	879	chr14	-	74844425	74845306	GGCCGGGGCCAAGGCTGCGGAGCTCGCGGAGGCAAGGCCGAGGATAAGGAGTGGATGCCG	intergenic
ASHG19A3L0000032	2105.13	2282.46	1611.27	3856.32	2026.9	2156.91	1587.26	10.8963	11.0166	10.5703	12.0202	11.116	11.1815	10.6702	P	M	P	P	M	M	M	noncoding	DB327252	lincRNA-PBX1-3	lincRNA	544	chr1	-	165092806	165093350	TGATTTTATGCTTTGAACATAAGGCTGGGTCCTTCAGCTCTCCTTCCCCTCTCAGAAACA	intergenic
ASHG19A3A015953	1861.3	1978.13	1459.09	2281.55	2111.88	2128.98	2050.99	10.7162	10.8121	10.4282	11.2587	11.1738	11.1629	11.0478	P	M	P	P	M	M	M	noncoding	HIT000324184_03		H-invDB	388	chr2	+	89901315	89901826	TGTCAACAGAGTTACAGTACCCCTCCCACAGTGTTACAAGTCATAACATAAACCTCCAAG	intergenic
ASHG19A3A019429	141.001	129.853	103.602	321.748	26.3882	12.1659	32.3705	7.22397	7.10716	6.83326	8.30105	4.6043	3.36236	4.77779	P	P	P	P	M	A	M	noncoding	ENST00000429106	AC006946.12	Ensembl	328	chr22	-	17574501	17574829	ACCTGTGTACCCATTACCACTTTCAGAAACTGACAGTCAGACATTGTGGATGAGAACAAA	intronic antisense	NM_014339	IL17RA	interleukin-17 receptor A precursor	+	17565850	17596584
ASHG19A3A052113	377.84	348.568	303.337	134.506	123.425	133.523	152.772	8.56218	8.44035	8.29843	6.97283	6.91907	7.00576	7.11986	P	P	P	P	M	M	M	noncoding	AK021664		RNAdb	1800	chr15	-	48426829	48428628	ATAGCAGGTATTACGCCGTGCTGCAAGGTTATGGTTCTCCAGATGGACACCATTACATTT	natural antisense	NM_205850	SLC24A5	sodium/potassium/calcium exchanger 5 precursor	+	48413168	48434589
ASHG19A3A038251	88.8477	81.4814	85.5316	152.194	59.5609	40.9821	55.9267	6.59071	6.46869	6.57776	7.15718	5.83412	5.24391	5.60419	P	P	P	P	M	M	M	noncoding	ENST00000457302	RP11-229P13.20	Ensembl	697	chr9	-	139931491	139932407	TCCACGTTCAGTCCCTCAGGTCACAATACACACCTATCCTGCTGGCCTGACGCAGGGGCC	intergenic
ASHG19A3A049250	2043.54	2014.47	1846.71	1563.43	1640.35	1707.09	1604.91	10.8556	10.8411	10.7701	10.7045	10.8083	10.8358	10.6847	P	P	P	P	M	M	M	noncoding	ENST00000422828	RP11-408E5.7	Ensembl	798	chr13	-	19775776	19801574	AACTGGAGGCAGAAATGGAAGCAGCTAGGCATGAACACCAATTAATGCTAATGAGGCAAG	intergenic
ASHG19A3A052960	915.202	916.199	779.639	812.098	440.799	442.909	447.986	9.7332	9.74264	9.57545	9.72781	8.84482	8.81921	8.74982	P	P	P	P	M	M	M	noncoding	AF070527		RNAdb	1590	chr15	+	63135273	63136827	TATTTCTTTTCAATAAAAAAGGTTTGGATTCGGCCTCTTCCTCTGAGCCCACCTCCCAGC	exon sense-overlapping	NM_015059	TLN2	talin-2	+	62939509	63136829
ASHG19A3A025477	2626.04	2485.49	2555.2	522.492	366.588	411.157	400.98	11.2041	11.137	11.23	9.0582	8.55222	8.70303	8.57748	P	P	P	P	M	M	M	noncoding	ENST00000244249	RP11-663P9.2	Ensembl	390	chr4	+	43900473	43901368	GATAGGAAAGAAAAACTTATGCAGGAAGGAAAATTGGATCGAACAGTTCACCTATCATAT	intergenic
ASHG19A3A027171	430.084	459.131	408.946	513.996	459.598	488.542	491.709	8.73738	8.81517	8.70971	9.03035	8.91043	8.97168	8.89866	P	P	P	P	P	M	M	noncoding	ENST00000504077	RP11-93O17.2	Ensembl	3139	chr5	-	98858027	98861166	GCATGCGAAGAATGTTTTGTGTTTGAAATTGTTTGAGGGGTTTGGGTTTATGTTTGTTGG	intergenic
ASHG19A3L0000152	299.758	290.469	226.686	481.768	296.193	237.525	248.92	8.24363	8.18944	7.89044	8.92755	8.24305	7.87736	7.86172	P	P	P	P	P	M	M	noncoding	exon99-	lincRNA-C1orf83	lincRNA	715	chr1	-	54587441	54588155	TTTGCATATGTGCCTGTGGATCTAATGTTACCCCCCACACCTCACGCGAGACTGTCTCCC
ASHG19A3A016888	200.868	220.453	184.156	116.803	118.949	119.691	107.78	7.7077	7.82427	7.62251	6.75669	6.86184	6.84218	6.58803	P	P	P	P	P	M	M	noncoding	AK091534		RNAdb	2937	chr2	+	208467341	208470282	ACGGGCCTGACATCAAATGGAAAGGAAGGATAATGTCCAGGAGTTGGAATGTTATCCTTG	exon sense-overlapping	NM_004379	CREB1	cyclic AMP-responsive element-binding protein 1	+	208394615	208470284
ASHG19A3A016888	200.868	220.453	184.156	116.803	118.949	119.691	107.78	7.7077	7.82427	7.62251	6.75669	6.86184	6.84218	6.58803	P	P	P	P	P	M	M	noncoding	AK091534		RNAdb	2937	chr2	+	208467341	208470282	ACGGGCCTGACATCAAATGGAAAGGAAGGATAATGTCCAGGAGTTGGAATGTTATCCTTG	exon sense-overlapping	NM_134442	CREB1	cyclic AMP-responsive element-binding protein 1	+	208394615	208470284
ASHG19A3A039706	92059.8	86033	81997.2	48024.5	47686	47133.5	49805.2	16.2127	16.1694	16.1399	15.7616	15.7174	15.7106	15.7094	P	P	P	P	M	M	M	noncoding	ENST00000416765	RP1-22N22.1	Ensembl	405	chrX	-	28677181	28677586	AACGTGTAACAATTATGCCAAAAGACATCAAGCTAGCAGGCTGCATACGTGGAGAACGTG	intronic antisense	NM_014271	IL1RAPL1	interleukin-1 receptor accessory protein-like 1	+	28605680	29974017
ASHG19A3A015390	1449.28	1294.72	1310.07	894.48	514.282	473.233	444.125	10.3628	10.2164	10.2802	9.87795	9.0918	8.92025	8.73854	P	P	P	P	M	M	M	noncoding	ENST00000421721	AC066692.3	Ensembl	457	chr2	+	24123562	24124019	AATATTATTAATACAAGACCAAGCAAATCCTCCCACCCAACTGGAAACATGAGTCATCCA	intronic antisense	NM_017552	ATAD2B	ATPase family AAA domain-containing protein 2B	-	23971533	24149934
ASHG19A3A008870	87.495	88.7815	79.602	83.1604	9.89532	17.6461	5.99416	6.57215	6.58803	6.47622	6.26385	3.09583	3.9635	2.40975	P	P	P	A	A	M	M	noncoding	ENST00000413694	CTA-253N17.1	Ensembl	377	chr1	-	185140465	185140842	ACGTGATTGGACGTGCGTAACTGCTAACAGCAAAAGGGGTTATGAATTACGTTACTTCCA	intronic antisense	NM_017673	SWT1	transcriptional protein SWT1	+	185126290	185260913
ASHG19A3A008870	87.495	88.7815	79.602	83.1604	9.89532	17.6461	5.99416	6.57215	6.58803	6.47622	6.26385	3.09583	3.9635	2.40975	P	P	P	A	A	M	M	noncoding	ENST00000413694	CTA-253N17.1	Ensembl	377	chr1	-	185140465	185140842	ACGTGATTGGACGTGCGTAACTGCTAACAGCAAAAGGGGTTATGAATTACGTTACTTCCA	intronic antisense	NM_001105518	SWT1	transcriptional protein SWT1	+	185126191	185260913
ASHG19A3L0002491	30.4063	22.4511	27.7029	37.869	25.2763	13.7137	29.3188	5.08668	4.74749	5.01603	5.07296	4.53939	3.55394	4.62569	A	P	P	P	M	A	M	noncoding	AK124439	lincRNA-SLC4A1AP	lincRNA	1883	chr2	-	27929629	27938599	AAGGTGACTCTAAGGTCCTATCTAGCCTTTTGATACAACATGGCTGGCTCATTTCCCCAA	intergenic
ASHG19A3A037661	267.489	265.507	245.744	189.418	239.628	224.273	219.244	8.08121	8.07066	8.00093	7.49456	7.92444	7.78848	7.66219	P	P	P	P	M	M	M	noncoding	ENST00000427728	RP11-350E12.5	Ensembl	748	chr9	-	90559190	90559938	AAGACTCTCAGCACCAAGTCCAAGAACAACAAGAAGAGTGCGTGGCAGGCCACCACCCAG	intergenic
ASHG19A3A039318	403.878	377.159	342.437	447.178	268.187	242.625	463.676	8.64753	8.55327	8.46548	8.80642	8.10225	7.91143	8.80175	P	P	P	M	M	M	M	noncoding	AK000834		misc_RNA	1395	chr9	+	132087214	132088575	TGGACTCCTTTTTAAGCCGTATTTGAGACCTAGTTGGCTTTCCCTTCCCAAGAATGTCCT	intergenic
ASHG19A3A051446	10978	11105.4	10061	5801.57	5927.23	6059.41	6230.03	13.2166	13.2439	13.1595	12.63	12.7011	12.7082	12.6714	P	P	P	M	M	M	M	noncoding	ENST00000254302	UBE2L7P	Ensembl	465	chr14	+	55695934	55696399	AGTAATTAGTGCTGAAAACTGGAAGCCAGCAACCAAAACCGACCAAGTAATCCAGTCCCT	intergenic
ASHG19A3A034360	57.1104	54.9894	48.5441	68.9271	80.0342	51.0708	85.8179	5.9696	5.9331	5.79121	5.97593	6.27017	5.57361	6.2443	P	P	P	M	M	M	M	noncoding	ENST00000455801	RP11-419M24.3	Ensembl	843	chr7	+	55865726	55866569	GTACCATGACCTGACCTCCCAGGTGAAGGTGGCCCACTTGCAACAAGGACCGAAAGAAGT	intronic antisense	NM_207366	41531	septin-14	-	55861236	55930482
ASHG19A3A037042	30.892	30.8704	34.8645	169.952	164.064	166.673	165.912	5.10737	5.16513	5.32912	7.33064	7.34839	7.33908	7.23671	P	P	P	M	M	M	M	noncoding	ENST00000420807	RP11-452J13.1	Ensembl	779	chr1	+	193273874	193335083	AGATTGTGGTGCTTGATGATGGAATGGTGCATAAATAAATAAACACGGGCTCTCAATCAA	intergenic
ASHG19A3A017089	21417.6	19010.4	18981.2	14014.6	17010.4	15175.7	15360.7	14.1362	14.0136	14.053	13.938	14.2493	14.0368	14.0012	P	P	P	M	M	M	M	noncoding	ENST00000452720	AC104634.3	Ensembl	462	chr2	+	232424613	232425075	TAAGAAAGGTGATATTGTGGACACCAAGGGAACGGTACTGTTCAAAAAGGAATGCCCCAC	intergenic
ASHG19A3L0000697	50.0862	40.7826	44.4806	56.0768	92.8632	65.8898	97.4374	5.78432	5.53539	5.67061	5.66027	6.49228	5.95995	6.42898	P	P	P	M	M	M	M	noncoding	AA757150	lincRNA-MBNL2-2	lincRNA	508	chr13	+	97787992	97788497	ATCTCATTCTTTCGAGAGCTATATCCTATAGAACCTGCCCCAAATGAAGGAGATCAGCCT	intergenic
ASHG19A3A019958	5.17353	5.40837	5	26.1836	30.2942	31.9223	33.5695	2.74127	2.37501	2.39437	4.5183	4.81391	4.87114	4.82952	A	A	A	M	M	M	M	noncoding	ENST00000420902	RP1-29C18.8	Ensembl	2975	chr22	-	50006304	50009364	GTCATCATGTAGCTAGCAATGGCCACATCAAAGATACTATGAACAATTTTAAACAACACC	intergenic
ASHG19A3A025593	80.3819	74.1452	73.3559	73.1541	89.9596	79.5995	88.6158	6.46029	6.34003	6.35932	6.06457	6.44067	6.23067	6.28915	P	P	P	M	M	M	M	noncoding	NR_015439	LOC550112	RefSeq_NR	2301	chr4	+	68566995	68588220	TAGGATAAACTTATGAAAAGAAAGGAGTAGCAGTCCCACAGACAAAGCATCCAGCCCCTG	bidirectional	NM_018227	UBA6	ubiquitin-like modifier-activating enzyme 6	-	68481478	68566889
ASHG19A3A023388	42.9974	35.462	42.1067	44.2411	46.4079	58.8934	52.2926	5.56981	5.35239	5.59349	5.31037	5.45537	5.78553	5.50409	P	P	P	M	M	M	M	noncoding	ENST00000461943	RP11-103G8.4	Ensembl	441	chr3	+	150479723	150480325	TTTCTCGGTCCAAGTTTTACTGGTGCGGCCCAGCCCTACCGAGAGTACCCGAATACACGT	natural antisense	NM_005067	SIAH2	E3 ubiquitin-protein ligase SIAH2	-	150458909	150481263
ASHG19A3A040083	597.345	611.97	519.374	153.43	149.865	155.308	152.41	9.16919	9.19558	9.01421	7.16903	7.21096	7.23504	7.11593	P	P	P	M	M	M	M	noncoding	uc004ebr.1	AK057701	UCSC_knowngene	2597	chrX	-	73498208	73512435	ATCCCACTTGACAGTTTAGAAGTGGATTGATAATACTCTTCTGGCTTAAAACCCTTCTTC	intergenic
ASHG19A3A050461	31.1834	34.3061	17.3782	35.1135	30.9418	33.0522	49.9009	5.11872	5.30652	4.3691	4.96053	4.84972	4.92083	5.43045	P	P	A	M	M	M	M	noncoding	ENST00000421601	RP11-297I6.4	Ensembl	1172	chr13	+	107306263	107324511	ACTCTCTCCAAATGTCTCCAAGCAAATTCAAAGCAGCTGAAAATAACTGCATGCCTGAGA	intergenic
ASHG19A3A050802	1634.31	977.472	1613.28	495.922	2146.36	601.609	2473.03	10.53	9.8318	10.5712	8.97904	11.2013	9.28551	11.3204	P	P	P	M	M	M	M	noncoding	ENST00000433591	RP11-423O2.2	Ensembl	593	chr1	-	142790582	142791175	AAGCCGCTGCCTGATATCAACACTTTGTAGATGTAGTATGACTATTCTTGTATGTTTCTA	intergenic
ASHG19A3L0003482	55.9678	44.2471	43.1527	45.4404	88.6851	44.0036	94.9829	5.94312	5.64367	5.62841	5.3498	6.42046	5.35278	6.39249	P	P	P	M	M	M	M	noncoding	chr2:177245637-177252100-	lincRNA-MTX2-4	lincRNA	6464	chr2	-	177245637	177252100	AGGAAATCAAAGAGCAACAGTGAGGAGTCTAGTCCTGCCTGGTATATCACATACCACAGT	intergenic
ASHG19A3A034290	85.1023	75.9987	73.8993	43.8104	46.3542	48.6409	46.2118	6.53377	6.37441	6.36936	5.29482	5.45347	5.50285	5.31593	P	P	P	M	M	M	M	noncoding	ENST00000436056	AC073115.7	Ensembl	532	chr7	+	46030503	46040497	CCTAAAAAATGGAAGCACAAACTGTACAACAAATACTCTCCATTCAAGTTGAAGTTCTCA	intergenic
ASHG19A3A016673	16.0785	5.4393	12.3115	17.3685	19.0331	24.5526	27.655	4.16947	2.44442	3.89733	3.8829	4.12144	4.47703	4.52808	A	A	A	M	M	M	M	noncoding	ENST00000431752	AC010680.1	Ensembl	609	chr2	+	179501301	179578965	AGACCAAACATTCAAAGATTGCTGAAGAGCCAACGAACTCTGATTCTGTCAAGATGATGT	natural antisense	NM_133432	TTN	titin isoform novex-1	-	179390717	179672150
ASHG19A3A016673	16.0785	5.4393	12.3115	17.3685	19.0331	24.5526	27.655	4.16947	2.44442	3.89733	3.8829	4.12144	4.47703	4.52808	A	A	A	M	M	M	M	noncoding	ENST00000431752	AC010680.1	Ensembl	609	chr2	+	179501301	179578965	AGACCAAACATTCAAAGATTGCTGAAGAGCCAACGAACTCTGATTCTGTCAAGATGATGT	natural antisense	NM_133378	TTN	titin isoform N2-A	-	179390717	179672150
ASHG19A3A016673	16.0785	5.4393	12.3115	17.3685	19.0331	24.5526	27.655	4.16947	2.44442	3.89733	3.8829	4.12144	4.47703	4.52808	A	A	A	M	M	M	M	noncoding	ENST00000431752	AC010680.1	Ensembl	609	chr2	+	179501301	179578965	AGACCAAACATTCAAAGATTGCTGAAGAGCCAACGAACTCTGATTCTGTCAAGATGATGT	natural antisense	NM_133437	TTN	titin isoform novex-2	-	179390717	179672150
ASHG19A3A016673	16.0785	5.4393	12.3115	17.3685	19.0331	24.5526	27.655	4.16947	2.44442	3.89733	3.8829	4.12144	4.47703	4.52808	A	A	A	M	M	M	M	noncoding	ENST00000431752	AC010680.1	Ensembl	609	chr2	+	179501301	179578965	AGACCAAACATTCAAAGATTGCTGAAGAGCCAACGAACTCTGATTCTGTCAAGATGATGT	natural antisense	NM_003319	TTN	titin isoform N2-B	-	179390717	179672150
ASHG19A3A030001	95.1183	82.1175	79.6156	92.9858	80.918	65.9935	89.2565	6.68852	6.4787	6.47654	6.43007	6.28759	5.96199	6.30194	P	P	P	M	M	M	M	noncoding	ENST00000440377	RP11-337C18.8	Ensembl	1057	chr1	+	146644805	146646726	CCACTCACCAAGTTTCATCCTCCATTTATGACCAAGGATAGGTATAACATCTGATCTTGA	bidirectional	NM_005399	PRKAB2	5'-AMP-activated protein kinase subunit beta-2	-	146626684	146644129
ASHG19A3A018856	94.19	81.8002	89.9705	141.529	144.441	133.054	168.246	6.67624	6.47375	6.64248	7.04836	7.15576	7.002	7.25759	P	P	P	M	M	M	M	noncoding	ENST00000457669	AP000696.2	Ensembl	1133	chr21	-	38004978	38009331	ATGGGTTTATCTTTTGGGACCAAGACATTGGGTCCCTACATGTTTTCCCCTACCCTTCTT	intergenic
ASHG19A3A035090	313.269	265.994	316.419	193.039	506.892	225.742	639.901	8.30117	8.07329	8.35423	7.5228	9.06729	7.79724	9.3028	P	P	P	M	M	M	M	noncoding	ENST00000445459	AC018643.4	Ensembl	744	chr7	+	131945619	131956028	TTATCAATTAGTGTCTGCTGCTGCCAGTGTCACCAGTTCTCTGCCTGATGAATGATGCTA	intronic antisense	NM_020911	PLXNA4	plexin-A4 isoform 1	-	131808090	132261323
ASHG19A3A008678	594.771	647.288	541.035	304.228	320.108	270.895	269.89	9.16033	9.269	9.06987	8.21548	8.35758	8.07973	7.9829	P	P	P	M	M	M	M	noncoding	BC033590		misc_RNA	1074	chr17	-	60703900	60704878	GCAAAGAAGACACATTTCTCCTACCACGAGTAATCAAAAACACTATGAAACTGTAATATG	natural antisense	NM_006039	MRC2	C-type mannose receptor 2	+	60704761	60770952
ASHG19A3A018364	178.949	150.842	165.456	163.532	246.533	152.047	245.909	7.54708	7.30926	7.47014	7.26974	7.97056	7.20089	7.84264	P	P	P	P	M	M	M	noncoding	ENST00000461248	RP1-300I2.2	Ensembl	556	chr20	+	43859508	43861972	TTATGAAGCTGAGCGGCTTCTTTCTACTCTCTGTGAACATCCTCCTTTGCCTCTGAATGA	intergenic
ASHG19A3A029234	69.368	60.5124	62.6438	37.834	37.1417	44.9166	53.0187	6.24752	6.0627	6.1406	5.07186	5.11997	5.38544	5.5258	P	P	P	P	M	M	M	noncoding	ENST00000428930	BX571672.1	Ensembl	614	chr1	+	143119060	143232318	TCATTCCAAGATTCCTTAAAATTCTGTAATTCTATGTCCTCTTGATTCTGTCTATAGAAA	intergenic
ASHG19A3A048291	657.775	568.007	585.159	236.822	337.602	234.066	343.445	9.29684	9.08983	9.17786	7.83396	8.43767	7.85649	8.34406	P	P	P	M	M	M	M	noncoding	NR_002803	RPL13P5	RefSeq_NR	634	chr12	+	6993144	6993766	GTCATCGCTGACTAGGAGGAAAACTTCCAGGCCTTGTTAGTCTCTGTATGGCCCATGCAA	intergenic
ASHG19A3A009886	90.5692	77.7471	85.0637	92.7309	99.6985	72.7685	135.541	6.61632	6.40585	6.56923	6.4264	6.59612	6.10611	6.93641	P	P	P	M	M	M	M	noncoding	AK091326		misc_RNA	2510	chr17	+	71172653	71175163	GAGTTTGTTTCCTTTAACTATGCCCTTGATCTGTCTTTCAAAACAATGTCCCCTTATAGT	intergenic
ASHG19A3A013017	101.057	78.0152	90.1502	91.1217	130.376	97.2232	141.004	6.77334	6.41	6.64409	6.40197	7.00214	6.52829	6.99625	P	P	P	M	M	M	M	noncoding	ENST00000433549	AC009892.2	Ensembl	287	chr19	+	55063252	55063539	TGGACTGACCCTCCAGTGCAGCTCTGATGTCGGCTACCACAGATTCGCTGTGTACTAGGA	intergenic
ASHG19A3A030631	848.168	822.065	827.526	640.561	992.538	690.709	1063.56	9.63249	9.59883	9.65878	9.3608	10.0731	9.49957	10.0731	P	P	P	M	M	M	M	noncoding	NR_027311	LOC153910	RefSeq_NR	2290	chr6	-	142847591	142958973	AAGGTCTTAGCACTGTTTCATCTTCCCAGAAGGCTTTTCCCTCTTCCACCCTGCTTCTAG	intergenic
ASHG19A3A026923	27.7875	16.9784	26.2759	15.0295	38.1244	18.2105	61.2013	4.96053	4.40421	4.94444	3.65507	5.16052	4.01367	5.73571	A	P	P	M	M	M	M	noncoding	ENST00000499125	AC138832.1	Ensembl	2390	chr5	-	70830117	70834641	TGGAGTCACAGTCCTGTATCTGATGTCTTGAAATTTTTAAGTTACTTTTATTCCCATGGT	intronic antisense	NM_018429	BDP1	transcription factor TFIIIB component B''	+	70751441	70863649
ASHG19A3A038716	168.541	165.294	160.674	236.459	256.044	258.45	270.864	7.46793	7.43433	7.43054	7.83176	8.0348	8.00386	7.98998	P	P	P	M	M	M	M	noncoding	uc004aex.2	BC080605	UCSC_knowngene	1482	chr9	+	68413445	68414927	ACAGTGAACACAAAGCCCCGCATGCTCGGGCAGGTTGGGAGAGTCCTTCTGCCTGTGCAG	intergenic
ASHG19A3A037486	24.0811	21.6493	22.6275	27.2312	23.1053	24.869	38.314	4.76014	4.7036	4.73199	4.58047	4.40705	4.49578	5.03228	A	P	P	M	M	M	M	noncoding	uc004aej.2	BC065763	UCSC_knowngene	1240	chr9	-	66688087	66699951	CTGAAGAAGAACAGAGCTCAAGAATGTATACCATCAGATGTCTCCAACTTTATTACAATT	intergenic
ASHG19A3A046696	478.812	482.202	461.28	419.628	775.823	666.025	812.255	8.8724	8.87753	8.86096	8.70849	9.69876	9.43985	9.65909	P	P	P	M	M	M	M	noncoding	ENST00000429268	AP001271.4	Ensembl	356	chr11	+	70492269	70493667	AATCTGCATCACAGAAGATATCCAGTTGGGCAAGACCCCGCCTCCCTGACAGGTGGCACA	intronic antisense	NM_133266	SHANK2	SH3 and multiple ankyrin repeat domains protein	-	70313960	70507923
ASHG19A3A046696	478.812	482.202	461.28	419.628	775.823	666.025	812.255	8.8724	8.87753	8.86096	8.70849	9.69876	9.43985	9.65909	P	P	P	M	M	M	M	noncoding	ENST00000429268	AP001271.4	Ensembl	356	chr11	+	70492269	70493667	AATCTGCATCACAGAAGATATCCAGTTGGGCAAGACCCCGCCTCCCTGACAGGTGGCACA	intronic antisense	NM_012309	SHANK2	SH3 and multiple ankyrin repeat domains protein	-	70313960	70935808
ASHG19A3A018495	266.61	283.345	245.947	151.875	199.401	226.05	215.685	8.07718	8.15834	8.00197	7.15401	7.64361	7.79935	7.63731	P	P	P	M	M	M	M	noncoding	uc002xyu.1	CR612603	UCSC_knowngene	2570	chr20	+	56285238	56287808	AGTTAATTCAGTGGCTTAAAGAAACCAAACCTACCCACAACGCTTGACCTCCCATTGATC	natural antisense	NM_199171	PMEPA1	transmembrane prostate androgen-induced protein	-	56223451	56286541
ASHG19A3A018495	266.61	283.345	245.947	151.875	199.401	226.05	215.685	8.07718	8.15834	8.00197	7.15401	7.64361	7.79935	7.63731	P	P	P	M	M	M	M	noncoding	uc002xyu.1	CR612603	UCSC_knowngene	2570	chr20	+	56285238	56287808	AGTTAATTCAGTGGCTTAAAGAAACCAAACCTACCCACAACGCTTGACCTCCCATTGATC	natural antisense	NM_199169	PMEPA1	transmembrane prostate androgen-induced protein	-	56223451	56285625
ASHG19A3A018495	266.61	283.345	245.947	151.875	199.401	226.05	215.685	8.07718	8.15834	8.00197	7.15401	7.64361	7.79935	7.63731	P	P	P	M	M	M	M	noncoding	uc002xyu.1	CR612603	UCSC_knowngene	2570	chr20	+	56285238	56287808	AGTTAATTCAGTGGCTTAAAGAAACCAAACCTACCCACAACGCTTGACCTCCCATTGATC	bidirectional	NM_020182	PMEPA1	transmembrane prostate androgen-induced protein	-	56223451	56285031
ASHG19A3A018495	266.61	283.345	245.947	151.875	199.401	226.05	215.685	8.07718	8.15834	8.00197	7.15401	7.64361	7.79935	7.63731	P	P	P	M	M	M	M	noncoding	uc002xyu.1	CR612603	UCSC_knowngene	2570	chr20	+	56285238	56287808	AGTTAATTCAGTGGCTTAAAGAAACCAAACCTACCCACAACGCTTGACCTCCCATTGATC	natural antisense	NM_199170	PMEPA1	transmembrane prostate androgen-induced protein	-	56223451	56285625
ASHG19A3A007368	27.2704	21.9355	23.5894	24.2938	37.6461	35.8877	37.4673	4.93698	4.71814	4.78594	4.40056	5.14034	5.04717	4.99858	A	P	P	M	M	M	M	noncoding	NR_026542	C21orf88	RefSeq_NR	1469	chr21	-	40969076	40984749	GAATGCTGGAGCAATACTTAAATAGGGGAGGTCAGAAATCTCACGGGCTCTGCTGGCTTC	intergenic
ASHG19A3L0000453	101.307	113.386	91.0896	29.3367	19.1998	24.8327	31.2721	6.77641	6.92189	6.65561	4.69021	4.13529	4.49387	4.72303	P	P	P	M	M	M	M	noncoding	BC007632	lincRNA-RIMBP2-1	lincRNA	3902	chr12	-	130916193	131200826	AGAGATGACTTTTCTAGAGAAGAGTAGAAACACAGCGGCAGAAACACAGCTCTGCACTTC	exon sense-overlapping	NM_015347	RIMBP2	RIMS-binding protein 2	-	130880680	131002410
ASHG19A3A027575	31.7751	31.038	25.5392	44.1996	38.7916	43.5128	43.1169	5.14815	5.17151	4.90107	5.30856	5.1863	5.33617	5.21351	P	P	P	M	M	M	M	noncoding	ENST00000503576	AC008427.3	Ensembl	2568	chr5	-	149362621	149365756	CCACTCCAACAGATGCCCTACACATAGGGTTTGCTTCTCATAAATATTTAAAATTGTTTA	natural antisense	NM_000112	SLC26A2	sulfate transporter	+	149340299	149366963
ASHG19A3A015537	574.463	672.197	605.298	31.7807	56.0574	54.2427	64.1427	9.10647	9.32372	9.22766	4.81327	5.73887	5.66669	5.81055	P	P	P	M	M	M	M	noncoding	ENST00000395092	GAPDHP25	Ensembl	1002	chr2	+	38512551	38513558	ATGTTCATGATGGGCGTGAACCATAAGAAATATGAAAACAGCCTCAAGATCATCAGCAAT	intergenic
ASHG19A3A048280	115.872	211.221	81.7687	173.598	122.161	151.611	89.9368	6.9577	7.76742	6.51232	7.35879	6.90252	7.19613	6.31239	P	P	P	P	M	M	M	noncoding	S79267		NRED	3429	chr12	+	6908074	6912140	ATCGCCCCTGTATACTCCAGGTCCAGTAAATGTTTGCTGACTAATGATTGGCATTTCCCT	exon sense-overlapping	NM_000616	CD4	T-cell surface glycoprotein CD4 isoform 1	+	6898637	6929976
ASHG19A3A048280	115.872	211.221	81.7687	173.598	122.161	151.611	89.9368	6.9577	7.76742	6.51232	7.35879	6.90252	7.19613	6.31239	P	P	P	P	M	M	M	noncoding	S79267		NRED	3429	chr12	+	6908074	6912140	ATCGCCCCTGTATACTCCAGGTCCAGTAAATGTTTGCTGACTAATGATTGGCATTTCCCT	intron sense-overlapping	NM_001195017	CD4	T-cell surface glycoprotein CD4 isoform 3	+	6898691	6929976
ASHG19A3A048280	115.872	211.221	81.7687	173.598	122.161	151.611	89.9368	6.9577	7.76742	6.51232	7.35879	6.90252	7.19613	6.31239	P	P	P	P	M	M	M	noncoding	S79267		NRED	3429	chr12	+	6908074	6912140	ATCGCCCCTGTATACTCCAGGTCCAGTAAATGTTTGCTGACTAATGATTGGCATTTCCCT	intron sense-overlapping	NM_001195014	CD4	T-cell surface glycoprotein CD4 isoform 2	+	6898691	6929976
ASHG19A3A048280	115.872	211.221	81.7687	173.598	122.161	151.611	89.9368	6.9577	7.76742	6.51232	7.35879	6.90252	7.19613	6.31239	P	P	P	P	M	M	M	noncoding	S79267		NRED	3429	chr12	+	6908074	6912140	ATCGCCCCTGTATACTCCAGGTCCAGTAAATGTTTGCTGACTAATGATTGGCATTTCCCT	intron sense-overlapping	NM_001195016	CD4	T-cell surface glycoprotein CD4 isoform 3	+	6898691	6929976
ASHG19A3A048280	115.872	211.221	81.7687	173.598	122.161	151.611	89.9368	6.9577	7.76742	6.51232	7.35879	6.90252	7.19613	6.31239	P	P	P	P	M	M	M	noncoding	S79267		NRED	3429	chr12	+	6908074	6912140	ATCGCCCCTGTATACTCCAGGTCCAGTAAATGTTTGCTGACTAATGATTGGCATTTCCCT	intron sense-overlapping	NM_001195015	CD4	T-cell surface glycoprotein CD4 isoform 3	+	6898691	6929976
ASHG19A3A047513	222.456	170.2	171.319	1519.95	1666.26	1061.7	1618.36	7.84105	7.47274	7.52091	10.6658	10.8303	10.15	10.6979	P	M	P	P	M	M	M	noncoding	NR_026544	LOC100233209	RefSeq_NR	2502	chr12	-	47602202	47610226	TTATTGTTCTTGCTGGTGTGGTATGTTCACGGCTGAAAAGATGGTCAGAAGGGGAAAGGA	natural antisense	NM_138371	FAM113B	hypothetical protein LOC91523	+	47610051	47630443
ASHG19A3A052719	61.4087	50.7474	44.7031	38.9144	40.3188	33.187	37.6825	6.06672	5.82906	5.67879	5.11601	5.24149	4.92589	5.00701	P	M	P	P	M	M	M	noncoding	ENST00000500533	AC104759.1	Ensembl	1772	chr15	+	31685045	31696932	AATAAAAAACAGGCATGATGGTGTTGGTTTATAAACCAAAGCAGAGGGCACTGGAGCCCC	intergenic
ASHG19A3A010323	128487	118051	79948.4	87826.4	92699.3	71806.3	96980.5	16.6836	16.6132	16.1045	16.6641	16.6836	16.2937	16.6863	P	P	P	P	M	M	M	noncoding	ENST00000462935	RP11-9H16.1	Ensembl	626	chr18	-	49371374	49372000	ATAAAAGGAAACAGAATGCCAAAATCAGCAGTCTCCTGGAGGAGCAGTTCCAGCAAGGAA	intergenic
ASHG19A3A012303	2888.97	2950.35	2418.33	757.569	589.34	496.615	546.467	11.3426	11.3761	11.1491	9.61978	9.28601	8.99977	9.06058	P	P	P	P	M	M	M	noncoding	NR_024282	LOC113230	RefSeq_NR	1329	chr19	+	14183820	14185873	TTTGTGAAATTGACCAGCCCCCTCTATAAAACTTACAGTCCCCCATTGGGAAACTGACCA	intergenic
ASHG19A3A019910	2856.44	2755.1	2368.1	616.436	556.439	562.207	585.912	11.3258	11.2747	11.1212	9.29965	9.198	9.18465	9.16709	P	P	P	P	M	M	M	noncoding	AK125234		misc_RNA	1684	chr22	-	44349516	44351200	AGGCTGTCTGTGATAGTTAAGATGTATATATTAAAGGCTGTCTGTGATGGTTACAATGTA	bidirectional	NM_015380	SAMM50	sorting and assembly machinery component 50	+	44351260	44392412
ASHG19A3L0000532	67.2689	62.3027	66.0253	271.207	69.3417	69.82	71.8274	6.20426	6.10333	6.20803	8.04046	6.06075	6.04752	5.97554	P	P	P	P	M	M	M	noncoding	AI910857	lincRNA-GLIPR1L2	lincRNA	485	chr12	-	75841852	75842332	TGTGTCTGGAACGTTTTGCTATCCACCTGCTCTCTGTAGCCATGTTTTGGCTTCAGTTAT	intergenic
ASHG19A3A007774	363.647	344.704	299.592	337	252.777	245.162	240.955	8.50906	8.42881	8.28049	8.37688	8.01542	7.92878	7.81092	P	P	P	P	M	M	M	noncoding	NR_033404	BMP1	RefSeq_NR	2784	chr8	+	22022652	22058996	TTGTGTTCACCTATCGACCTTGCGGCTCGGGACCGCCCCCCTGAGCTGGCCCCGCCCTCC	exon sense-overlapping	NM_001199	BMP1	bone morphogenetic protein 1 isoform 1	+	22022652	22058996
ASHG19A3A007774	363.647	344.704	299.592	337	252.777	245.162	240.955	8.50906	8.42881	8.28049	8.37688	8.01542	7.92878	7.81092	P	P	P	P	M	M	M	noncoding	NR_033404	BMP1	RefSeq_NR	2784	chr8	+	22022652	22058996	TTGTGTTCACCTATCGACCTTGCGGCTCGGGACCGCCCCCCTGAGCTGGCCCCGCCCTCC	exon sense-overlapping	NM_006129	BMP1	bone morphogenetic protein 1 isoform 3	+	22022652	22069840
ASHG19A3A009174	218.421	179.406	164.404	256.829	128.486	95.9269	110.827	7.81433	7.54561	7.46171	7.96026	6.98238	6.50911	6.62784	P	P	P	P	M	M	M	noncoding	NR_003190	LOC162632	RefSeq_NR	3901	chr17	+	16690205	16707819	ACAGCCTTTAGAAACTCCCCTTGAACGTGCTGGGCTGACCTTCCTCTGATCACAGGCAAG	intergenic
ASHG19A3A044810	348.47	355.206	324.614	456.288	229.761	197.45	186.936	8.45223	8.46866	8.39015	8.83802	7.85858	7.59298	7.41871	P	P	P	P	P	M	M	noncoding	ENST00000324875	AC090719.1	Ensembl	879	chr11	-	4682082	4682963	TTACCTATGTGTACCTGGTGATGCCTTCTGTGCTCCACCCCATCATTTACAGTATGAAGT	intergenic
ASHG19A3A046591	646.288	667.556	506.441	810.293	860.243	676.736	830.498	9.27482	9.31409	8.98464	9.72353	9.85496	9.46401	9.69556	P	P	P	P	M	M	M	noncoding	uc010rog.1	NEAT1	UCSC_knowngene	17357	chr11	+	65190268	65207625	AATCTTAAAAAGTCCACAGCAGATGCATCCGGCTCGAGGGGCCATCAGCTTTGAATAAAT	intergenic
ASHG19A3A034616	50.2146	17.7134	46.8009	45.635	25.0166	14.8603	21.3738	5.78881	4.45597	5.73832	5.35574	4.52169	3.68908	4.13185	A	P	P	P	M	M	M	noncoding	G30752		misc_RNA	278	chr7	+	77702719	77702997	AACTGCTTATGTTGGGAATTTTTTCATCCAGCGGCACCTCTATTTACCTTGGCCCTGACT	intronic antisense	NM_012301	MAGI2	membrane-associated guanylate kinase, WW and PDZ	-	77646373	79082890
ASHG19A3A035758	189.339	185.556	149.793	1026.89	773.524	804.799	710.873	7.62954	7.59065	7.34072	10.0782	9.69255	9.72285	9.46449	P	P	P	P	M	M	M	noncoding	BC033145		RNAdb	2724	chr8	-	53850991	53853677	AGGCTCCTCACCAGTTCCCCTAAGAATCGAATGAAATAAACTAAATATTGGTTATTTCCA	natural antisense	NM_005285	NPBWR1	neuropeptides B/W receptor type 1	+	53852467	53853454
ASHG19A3A008717	56.873	44.2876	42.8491	47.7581	36.0766	23.0923	33.7672	5.96458	5.64501	5.61958	5.42247	5.07623	4.38415	4.83869	P	P	P	P	M	M	M	noncoding	uc002jev.3	DKFZp313K107	UCSC_knowngene	4368	chr17	-	62775188	62833302	CAAGCACATCCGAGCTGAGGCCGGAGGAAAAAGGAAGAAAAGTGCCCACCAGAAGCCTCT	intergenic
CUST_43_PI426075208	37.2099	25.0061	30.1278	62.2691	66.5641	41.2555	61.9749	5.36788	4.88934	5.13318	5.82336	5.99967	5.25377	5.75711	A	P	P	M	M	M	M	noncoding	nc-HOXB2-160+	nc-HOXB2-160	HOX cluster	310	chr17	+	46622394	46622704	TTATTTGGTTTAATTGATTCAAAAACACCAGAGGACCACGACCAGGACACCATGAGCCCC	bidirectional	NM_002145	HOXB2	homeobox protein Hox-B2	-	46620018	46622393
ASHG19A3A034765	284.286	251.49	274.02	461.975	248.795	160.956	271.052	8.16438	7.99736	8.15654	8.86224	7.9866	7.29062	7.99201	P	P	P	M	M	M	M	noncoding	AK128105		misc_RNA	3726	chr1	+	170214541	170218267	ATTTTTTCCCAGTGGTCCCTTTTTCTCTGTCTCATCCTTACATTATGGCATCCCCAGAGT	intergenic
ASHG19A3L0000925	31.851	18.4803	23.3454	38.1064	25.9451	30.8699	52.8508	5.15135	4.50894	4.77506	5.08285	4.57662	4.82184	5.52081	A	P	P	M	M	M	M	noncoding	BM678241	lincRNA-SOX9	lincRNA	707	chr17	+	68774744	69000634	CTTTAAAAGCAACATTTTAAAAATGGGGATCCGTCCAGCTGTGTTCTGAGCTTGGGCAGC	intergenic
ASHG19A3A025004	378.734	357.91	370.485	457.508	216.883	207.315	519.356	8.56658	8.47938	8.57748	8.84397	7.77011	7.66954	8.9761	P	P	P	M	M	M	M	noncoding	AF130075		misc_RNA	2401	chr4	-	174388983	174391192	TCCACTTGGGGAAAATCTCATTCCCCATCCTCTTGTAATTAAAAAGCATGGTTTGTTTGT	intergenic
ASHG19A3A034459	406.832	362.78	363.361	603.746	512.594	477.977	558.033	8.65757	8.50009	8.55075	9.27073	9.08779	8.93684	9.09559	P	P	P	M	M	M	M	noncoding	ENST00000414799	RP11-460N20.4	Ensembl	232	chr7	+	64535400	64539158	ATGCCAGCATGGGTTGTTCATCACCGCTGCTGTCCCTGCTGTCGCTCCTGGTTGGTGCGT	intergenic
ASHG19A3A029791	91918.1	85495.8	80615.2	62062.3	66501.9	65756.9	64911.9	16.2091	16.1621	16.1149	16.1372	16.2042	16.1705	16.1093	P	P	P	M	M	M	M	noncoding	ENST00000374520	RPL12P1	Ensembl	498	chr6	-	33367835	33368333	TCTATGGGCTGTAATGTTGATGGCCACCACCCTCATGACATCATAGATGACATCAACAGT	intronic antisense	NM_002263	KIFC1	kinesin-like protein KIFC1	+	33359312	33377699
ASHG19A3A007737	900.527	843.07	807.692	938.571	881.01	723.026	973.275	9.71388	9.63613	9.62437	9.95286	9.89355	9.57036	9.94286	P	P	P	M	M	M	M	noncoding	NR_033204	LOC404266	RefSeq_NR	486	chr17	+	46669681	46683772	TCTCGATGCGCCGTCGCCGGGTCAGCCGTTTCCTCTCCCTCGCCGGCCTCGGCGGAGATT	natural antisense	NM_002147	HOXB5	homeobox protein Hox-B5	-	46668618	46671103
ASHG19A3A007737	900.527	843.07	807.692	938.571	881.01	723.026	973.275	9.71388	9.63613	9.62437	9.95286	9.89355	9.57036	9.94286	P	P	P	M	M	M	M	noncoding	NR_033204	LOC404266	RefSeq_NR	486	chr17	+	46669681	46683772	TCTCGATGCGCCGTCGCCGGGTCAGCCGTTTCCTCTCCCTCGCCGGCCTCGGCGGAGATT	intronic antisense	NM_018952	HOXB6	homeobox protein Hox-B6	-	46673098	46682334
ASHG19A3A016340	4301.11	4037.49	4181.86	1105.62	1241.62	727.397	1223.9	11.906	11.8207	11.9315	10.1918	10.3994	9.57974	10.2913	P	P	P	M	M	M	M	noncoding	ENST00000448112	AC068137.3	Ensembl	561	chr2	+	131028168	131029845	CGCCTAATTTCATATGAAGTTACCCTAGCCATCAGCCTATTATCAGTTCTACTGATAAGC	intergenic
ASHG19A3A010099	30.1601	34.2717	30.7742	36.1558	33.6546	28.1252	38.0679	5.07544	5.30448	5.16104	5.00481	4.969	4.68011	5.02271	P	P	P	M	M	M	M	noncoding	NR_029406	FLJ43681	RefSeq_NR	2256	chr17	+	81174665	81188573	TCCTGATTAATGGCCGATGAATTTCTCCTTAAGGCCCTGAAACTGCCTACTCAGAACCAA	intergenic
ASHG19A3A036956	52.2743	51.3389	42.4021	76.1115	176.372	98.2204	212.702	5.84489	5.84604	5.60312	6.12716	7.45765	6.54453	7.61729	P	P	P	M	M	M	M	noncoding	BC024311		misc_RNA	1544	chr8	+	141601782	141603294	CTCACAAGTCAAAAACATCCTCTTTGATCCACCATCTGTCTTTACTGAACAATATTAGAA	intronic antisense	NM_001164623	EIF2C2	protein argonaute-2 isoform 2	-	141541263	141645646
ASHG19A3A036956	52.2743	51.3389	42.4021	76.1115	176.372	98.2204	212.702	5.84489	5.84604	5.60312	6.12716	7.45765	6.54453	7.61729	P	P	P	M	M	M	M	noncoding	BC024311		misc_RNA	1544	chr8	+	141601782	141603294	CTCACAAGTCAAAAACATCCTCTTTGATCCACCATCTGTCTTTACTGAACAATATTAGAA	intronic antisense	NM_012154	EIF2C2	protein argonaute-2 isoform 1	-	141541263	141645646
ASHG19A3L0003088	38.3932	21.1604	21.0146	23.0567	29.6083	30.7783	37.4654	5.41096	4.67652	4.63507	4.32046	4.78049	4.81743	4.99833	A	P	P	M	M	M	M	noncoding	BE501942	lincRNA-MRPL36-2	lincRNA	508	chr5	+	1780805	1782205	TTGGCAGGAATCTCTTTTATTCACTTTCCCCAAGATGTCTTCTTGGGTCTTCCGACAGTG	intergenic
ASHG19A3A025480	393.046	374.757	342.457	2009.64	2185.86	2198.67	2294.04	8.6099	8.54548	8.4659	11.0722	11.2317	11.2125	11.2118	P	P	P	M	M	M	M	noncoding	NR_026989	LOC339524	RefSeq_NR	1419	chr1	+	87595447	87634884	CACGACTCAAAGAAAATGTGAATAAAAGGCATCTTTGTTTCCCAGTCAAATTAGCTGATT	intergenic
ASHG19A3A052591	1483.52	1348.77	1548.64	301.796	540.106	315.018	569.599	10.396	10.2695	10.514	8.20266	9.16131	8.3062	9.12879	P	P	P	M	M	M	M	noncoding	ENST00000471472	CTD-3221M10.1	Ensembl	723	chr15	-	100091582	100092305	CACATATTGCATGGGGGTAACCAAGCCTGAAGTCAGTAAAAATCTACAAGCCTGGTTATG	intergenic
ASHG19A3A013021	67.8181	46.7814	55.7808	78.4928	97.1534	80.0231	99.9151	6.21526	5.72108	5.97912	6.17577	6.55703	6.23924	6.46667	P	P	P	M	M	M	M	noncoding	ENST00000432400	AC009892.5	Ensembl	319	chr19	+	55119336	55119843	TATTGCTGTGAGTATTTCAGTCCTGCTGGCAGGTGAGCACTCAGAGACCCCCTGCAGCTG	intergenic
ASHG19A3A051673	24.9075	21.6998	25.5505	26.562	28.3504	25.5703	28.1186	4.80881	4.70613	4.90154	4.54105	4.71689	4.53754	4.5564	A	P	P	M	M	M	M	noncoding	AL832767		misc_RNA	4743	chr14	+	88641818	88646541	AGAGACATTGGATTGGATCTTCCAGAAGGTCTTTGTTGCAATTTTTCTCCATCATTGAAA	natural antisense	NM_021161	KCNK10	potassium channel subfamily K member 10 isoform	-	88646451	88793256
ASHG19A3A051673	24.9075	21.6998	25.5505	26.562	28.3504	25.5703	28.1186	4.80881	4.70613	4.90154	4.54105	4.71689	4.53754	4.5564	A	P	P	M	M	M	M	noncoding	AL832767		misc_RNA	4743	chr14	+	88641818	88646541	AGAGACATTGGATTGGATCTTCCAGAAGGTCTTTGTTGCAATTTTTCTCCATCATTGAAA	natural antisense	NM_138318	KCNK10	potassium channel subfamily K member 10 isoform	-	88646451	88737255
ASHG19A3A051673	24.9075	21.6998	25.5505	26.562	28.3504	25.5703	28.1186	4.80881	4.70613	4.90154	4.54105	4.71689	4.53754	4.5564	A	P	P	M	M	M	M	noncoding	AL832767		misc_RNA	4743	chr14	+	88641818	88646541	AGAGACATTGGATTGGATCTTCCAGAAGGTCTTTGTTGCAATTTTTCTCCATCATTGAAA	natural antisense	NM_138317	KCNK10	potassium channel subfamily K member 10 isoform	-	88646451	88789593
CUST_314_PI426073487	30.6401	26.4743	33.4885	12.2817	20.5515	23.3338	25.9368	5.09678	4.9634	5.27414	3.32307	4.23686	4.39787	4.43397	A	P	P	M	M	M	A	noncoding	uc.316+	uc.316	UCR	240	chr10	+	126905564	126905804	TGTCAGAAGCTCAAAGCCACATTGTTTCACTTGACAATCTTCCCAGAGGTGGGGAAAAAA	intergenic
ASHG19A3A039808	424.705	316.741	388.572	408.463	413.873	255.783	477.868	8.721	8.31302	8.64143	8.66554	8.73941	7.98929	8.84697	P	P	P	M	M	M	M	noncoding	ENST00000423038	RP11-571E6.1	Ensembl	635	chrX	-	47132764	47133789	TGATGTCACCTTCCCCTGTGTCACTCCGTTTGAGGGGATCACATTTAAGAATTATTACAC	intergenic
ASHG19A3A022905	15.6969	9.28643	6.74189	25.1524	18.0303	20.7399	28.7191	4.1379	3.68929	3.11407	4.45418	4.03179	4.21698	4.59339	A	A	A	M	M	M	M	noncoding	ENST00000473259	RP11-892D12.1	Ensembl	814	chr3	+	98152877	98153691	GAATACTACAACATGGTGATATTTCAGTAGGGTCCCACAGGAGGCTCTTACTGCTGGATT	intergenic
ASHG19A3A008954	33.3144	21.1418	29.3125	27.6003	33.992	28.0933	45.1586	5.21665	4.67577	5.096	4.60041	4.98574	4.67833	5.2821	A	P	P	M	M	M	M	noncoding	uc002ftq.2	BC040634	UCSC_knowngene	1744	chr17	+	1921176	1923997	TTCATCTTCTTTCTTTTCCTAAAGAATCACGGGGAGAACTGACCTCTCTGGGACTCAACC	intronic antisense	NM_178568	RTN4RL1	reticulon-4 receptor-like 1 precursor	-	1837970	1928178
ASHG19A3A019149	315.152	295.126	298.671	249.101	295.469	223.96	389.849	8.31038	8.20855	8.27515	7.91224	8.23832	7.78706	8.53533	P	P	P	M	M	M	M	noncoding	ENST00000433071	AP000251.2	Ensembl	843	chr21	+	32931536	32932800	GATAAACCTAAACCGGAAAATTGAAAGTCATCCCTGATTCCTCCTTCTTCTTAACCCTCT	bidirectional	NM_003253	TIAM1	T-lymphoma invasion and metastasis-inducing	-	32490735	32931290
ASHG19A3A020855	100793	100406	89244.3	81303.2	92619.1	71697.7	96622.5	16.3286	16.3755	16.2771	16.5583	16.6779	16.292	16.6779	P	P	P	M	M	M	M	noncoding	ENST00000429309	AC138972.1	Ensembl	333	chr3	-	32676713	32677046	GAAAATACTACAGAGTGTGCACACTGGCTATCATTGATCCAGGTGACTCTGACATCGTTA	intergenic
ASHG19A3A044754	14.0687	11.4861	13.7188	38.1144	38.7372	33.5172	44.0737	3.99404	3.93509	4.04403	5.0831	5.18373	4.94093	5.24628	A	A	A	M	M	M	M	noncoding	CR607245		RNAdb	1357	chr11	-	2016422	2018128	AGCAAGGAGGCTGCAGGGGCTCGGCCTGCGGGCGCCGGTCCCACGAGGCACTGCGGCCCA	intergenic
ASHG19A3A053659	1274.55	1308.98	1118.84	280.453	280.581	281.527	309.44	10.1877	10.2302	10.0661	8.09197	8.16986	8.13724	8.1911	P	P	P	M	M	M	M	noncoding	ENST00000379752	RP11-110J1.2	Ensembl	1532	chr1	-	157029022	157030554	GCATCCTCTGATGGCACTGTAAAGATCTGGAATATGAAGACCACAGAATGTTCAGATACC	intergenic
ASHG19A3A021088	1400.1	1391.03	1147.91	819.442	1291.91	605.757	1314.33	10.3155	10.3087	10.1023	9.74347	10.4582	9.29477	10.4002	P	P	P	M	M	M	M	noncoding	uc003cyi.1	AK125500	UCSC_knowngene	2755	chr3	-	50153454	50193518	CCTCCTACCCTGCCCCTGGGATCTGGAACTAAATGCTACAAATAAAAGCTAAAGGCAATT	natural antisense	NM_005778	RBM5	RNA-binding protein 5	+	50126351	50156392
ASHG19A3A021088	1400.1	1391.03	1147.91	819.442	1291.91	605.757	1314.33	10.3155	10.3087	10.1023	9.74347	10.4582	9.29477	10.4002	P	P	P	M	M	M	M	noncoding	uc003cyi.1	AK125500	UCSC_knowngene	2755	chr3	-	50153454	50193518	CCTCCTACCCTGCCCCTGGGATCTGGAACTAAATGCTACAAATAAAAGCTAAAGGCAATT	intronic antisense	NM_004186	SEMA3F	semaphorin-3F precursor	+	50192847	50226508
ASHG19A3A018758	44.3538	28.8108	43.3902	34.9244	52.2473	39.5448	68.9006	5.61475	5.07518	5.63489	4.95271	5.63041	5.19217	5.9177	P	P	P	M	M	M	M	noncoding	ENST00000406413	AP000567.27	Ensembl	156	chr21	-	31898863	31899019	GATGGTGGTTATGGCTGTGACCATTCTTATCCCTCTTTCTATGAAGGATATTGGTAATCT	intergenic
ASHG19A3A021715	117.951	107.057	116.565	84.5702	119.308	107.093	133.763	6.98216	6.8439	6.9957	6.28961	6.86714	6.6737	6.91475	P	P	P	M	M	M	M	noncoding	NR_033439	PLSCR4	RefSeq_NR	3400	chr3	-	145910125	145968651	GGGATGGGGGTCCTGGCTGCACTTCACGGGGGCGGCCCTTTCGTTTCGCTCTGCGTGACA	exon sense-overlapping	NM_001177304	PLSCR4	phospholipid scramblase 4 isoform c	-	145910123	145968966
ASHG19A3A021715	117.951	107.057	116.565	84.5702	119.308	107.093	133.763	6.98216	6.8439	6.9957	6.28961	6.86714	6.6737	6.91475	P	P	P	M	M	M	M	noncoding	NR_033439	PLSCR4	RefSeq_NR	3400	chr3	-	145910125	145968651	GGGATGGGGGTCCTGGCTGCACTTCACGGGGGCGGCCCTTTCGTTTCGCTCTGCGTGACA	exon sense-overlapping	NM_001128306	PLSCR4	phospholipid scramblase 4 isoform b	-	145910123	145968966
ASHG19A3A021715	117.951	107.057	116.565	84.5702	119.308	107.093	133.763	6.98216	6.8439	6.9957	6.28961	6.86714	6.6737	6.91475	P	P	P	M	M	M	M	noncoding	NR_033439	PLSCR4	RefSeq_NR	3400	chr3	-	145910125	145968651	GGGATGGGGGTCCTGGCTGCACTTCACGGGGGCGGCCCTTTCGTTTCGCTCTGCGTGACA	exon sense-overlapping	NM_020353	PLSCR4	phospholipid scramblase 4 isoform a	-	145910123	145968966
ASHG19A3A043920	13.8196	6.64387	11.5501	23.0836	23.9957	28.3262	30.1339	3.9635	3.33754	3.81534	4.32276	4.46152	4.69177	4.66413	A	A	A	M	M	M	M	noncoding	NR_003929	PPIEL	RefSeq_NR	2640	chr1	-	39987952	40025370	AATATCTTATGTGGGCTCAGGTATTTGTGATTGCTGCTGAGCAAGGCGGATATCTGAGGT	natural antisense	NM_181809	BMP8A	bone morphogenetic protein 8A precursor	+	39957317	39995541
ASHG19A3A045027	35.2512	39.2811	35.1883	47.1165	60.6933	62.4045	68.7564	5.29795	5.48689	5.34172	5.40318	5.86257	5.87357	5.91465	P	P	P	M	M	M	M	noncoding	uc009yjc.1	EF565102	UCSC_knowngene	403	chr11	-	27645540	27656128	AATGACGGGAGTGTGAGATCCACCACATGGCGAGGCACCCCAGGAACCTGTTTTCTTCTT	intergenic
ASHG19A3A021072	9.12321	5.88236	5	18.1785	27.8722	24.4747	29.3879	3.39598	3.0919	2.39437	3.95485	4.68933	4.47297	4.62887	A	A	A	M	M	M	M	noncoding	uc003cxd.1	AK096387	UCSC_knowngene	2603	chr3	-	49586738	49591799	GTTCTGTTTGCAGGAAGAGAGTGATAGGCACACAAATTATTTCCAATAAACTACAGAAAA	bidirectional	NM_003458	BSN	protein bassoon	+	49591921	49708982
ASHG19A3A055087	231.482	227.267	211.98	364.112	467.025	479.488	488.71	7.89715	7.86557	7.80861	8.49583	8.93507	8.94193	8.8884	P	P	P	M	M	M	M	noncoding	uc001kct.2	BC051760	UCSC_knowngene	1855	chr10	-	85926985	85931832	ggcacttggagtccggacatctacaacttggcccaaccaccgagaccacccttaaacatc	intergenic
ASHG19A3A049735	21.2957	20.3429	10.8753	19.7026	27.9072	52.6002	25.3012	4.57522	4.62861	3.73298	4.07958	4.69117	5.62009	4.39787	A	P	A	M	M	M	M	noncoding	ENST00000433569	RP11-477B16.4	Ensembl	1844	chr13	-	95351947	95355116	TTTGGGTCTACTGGCGAAAGAGGAGAAAGACCTTTCTGCTGGGAAAATGCTGTCTCATAA	intergenic
ASHG19A3A010188	52104.7	63839.3	31912.8	33382.7	27891.2	43878	43226.4	15.402	15.7244	14.8001	15.2428	14.9457	15.6032	15.5174	P	P	P	M	M	M	M	noncoding	ENST00000473808	RP11-254G11.1	Ensembl	480	chr18	-	18699142	18699622	AATGATCAGAAAAAGAAAGAAGCCAAAGAGAAAGGCACCTGGGTTCAACTGAAGCCCCAG	intergenic
ASHG19A3A012304	47.677	46.3438	36.0914	27.0073	195.822	32.4589	46.5545	5.71631	5.70846	5.38016	4.56756	7.61303	4.89555	5.32712	P	P	P	M	M	M	M	noncoding	uc002myf.2	BX537706	UCSC_knowngene	2858	chr19	+	14247990	14282073	AGGGTCATGGTGTCATAGACACCCCCAAATTGGGAAGGGGCAGTGGAGCTGGAAACCAAG	bidirectional	NM_018154	ASF1B	histone chaperone ASF1B	-	14230320	14247440
ASHG19A3A012304	47.677	46.3438	36.0914	27.0073	195.822	32.4589	46.5545	5.71631	5.70846	5.38016	4.56756	7.61303	4.89555	5.32712	P	P	P	M	M	M	M	noncoding	uc002myf.2	BX537706	UCSC_knowngene	2858	chr19	+	14247990	14282073	AGGGTCATGGTGTCATAGACACCCCCAAATTGGGAAGGGGCAGTGGAGCTGGAAACCAAG	natural antisense	NM_014921	LPHN1	latrophilin-1 isoform 2 precursor	-	14258548	14316997
ASHG19A3A012304	47.677	46.3438	36.0914	27.0073	195.822	32.4589	46.5545	5.71631	5.70846	5.38016	4.56756	7.61303	4.89555	5.32712	P	P	P	M	M	M	M	noncoding	uc002myf.2	BX537706	UCSC_knowngene	2858	chr19	+	14247990	14282073	AGGGTCATGGTGTCATAGACACCCCCAAATTGGGAAGGGGCAGTGGAGCTGGAAACCAAG	natural antisense	NM_001008701	LPHN1	latrophilin-1 isoform 1 precursor	-	14258548	14316997
ASHG19A3A008580	218.633	263.033	176.075	239.496	164.023	169.241	200.306	7.81572	8.05789	7.55901	7.85173	7.3474	7.36254	7.52838	P	P	P	P	M	M	M	noncoding	ENST00000511580	RP11-506D12.3	Ensembl	565	chr17	-	48917417	48919707	ATCTTCCTCCTTATATTTGAGGAAGAAATGAGGACGCCCCACAAGGACCTTCTTCAGCTT	natural antisense	NM_175575	WFIKKN2	WAP, kazal, immunoglobulin, kunitz and NTR	+	48912604	48919709
ASHG19A3A014240	1075.2	930.915	741.796	754.059	634.323	467.551	580.883	9.95172	9.76189	9.50485	9.61237	9.39989	8.90004	9.15472	P	P	P	P	M	M	M	noncoding	ENST00000435407	AC024704.2	Ensembl	416	chr2	-	114586966	114588696	TGAATCACTCCCCCACTGAGGAAGAAACCATCTGTGGAAAAGACTGTATAAGGTACTTCC	intergenic
ASHG19A3A025241	75749.8	64860.5	59548.8	603.02	625.093	511.226	646.774	15.9351	15.7495	15.6816	9.26972	9.37997	9.04106	9.316	P	P	P	P	M	M	M	noncoding	NR_026892	LOC84740	RefSeq_NR	6810	chr4	+	7755816	7780652	CCACGGGGGGCTTTTTACCCTTGAGCTGTTGAAATAAACATATAAGAACATTAAAAATAA	natural antisense	NM_001134647	AFAP1	actin filament-associated protein 1 isoform a	-	7760439	7941653
ASHG19A3A025241	75749.8	64860.5	59548.8	603.02	625.093	511.226	646.774	15.9351	15.7495	15.6816	9.26972	9.37997	9.04106	9.316	P	P	P	P	M	M	M	noncoding	NR_026892	LOC84740	RefSeq_NR	6810	chr4	+	7755816	7780652	CCACGGGGGGCTTTTTACCCTTGAGCTGTTGAAATAAACATATAAGAACATTAAAAATAA	natural antisense	NM_198595	AFAP1	actin filament-associated protein 1	-	7760439	7941653
ASHG19A3A008011	6.16452	35.4341	7.61865	25.641	16.886	17.5584	19.4098	2.91871	5.35079	3.25555	4.48597	3.92937	3.95485	3.97699	P	A	A	P	M	M	M	noncoding	ENST00000456090	SMCR2	Ensembl	564	chr17	-	17577339	17581002	CAGGGACCACGCTTATCCTTGGCTCACTCAATAGGATGCAAGGGCGTTTACTGTGGCCAG	intergenic
ASHG19A3A000258	45.6008	27.7328	35.7507	397.826	336.619	132.092	376.152	5.65549	5.02662	5.36626	8.6269	8.43371	6.99107	8.48161	A	P	P	P	M	M	M	noncoding	ENST00000440199	BX284650.1	Ensembl	503	chr1	-	143647637	143663987	TTCCCTTGGGCCCCCAGGCGGTTCAGCATATAAACTGTTAACATGAGGTAAGCGCCAAGG	intergenic
ASHG19A3A019630	4052.8	3066.36	3305.31	2962.52	3074.73	2327.5	3151.82	11.8195	11.433	11.5931	11.6374	11.7288	11.2977	11.6774	P	M	P	P	P	M	M	noncoding	ENST00000425548	CTA-373H7.5	Ensembl	448	chr22	-	27040852	27041300	AAGAACTGATCCGAAGCTCATTTCAAGTGTCAAACAATCCTCAAGCACAGCAAGGCTGCT	intergenic
ASHG19A3A051572	1736.54	1665.13	1308.79	879.892	803.485	755.826	903.748	10.6122	10.5576	10.2792	9.84951	9.75372	9.63113	9.83161	P	M	P	P	M	M	M	noncoding	NR_027046	LOC145474	RefSeq_NR	1859	chr14	+	71954577	71956418	ATATATTCTTCAGTGTGATTTAGGTGAGTCAGGAATTTTTCCTCTGGAGACTGCCTAAAT	intergenic
ASHG19A3A013247	65.8839	61.7026	53.6974	129.652	46.9616	119.795	47.4397	6.17178	6.09031	5.92464	6.9151	5.47267	6.84326	5.35692	P	P	P	P	M	M	M	noncoding	ENST00000418970	AC017076.4	Ensembl	2347	chr2	-	7052407	7058813	AATGTAACGTCTCATCTTCAGCCCATCTGTGCTACTGATCATCTCATTCCAGAAGCCATG	intronic antisense	NM_014746	RNF144A	probable E3 ubiquitin-protein ligase RNF144A	+	7057522	7184309
ASHG19A3A048668	95.3311	107.176	92.8452	74.7952	26.3917	73.2778	33.6377	6.69221	6.84557	6.68234	6.09886	4.60455	6.11654	4.83362	P	P	P	P	M	M	M	noncoding	AK022887		RNAdb	2629	chr12	+	54513394	54516023	AAAGACCACCCTTTTGTCCATCTTCTTCACATGGGTGGATGTGAGAAAAGTTTCTCTCCC	intergenic
ASHG19A3A053043	1214.13	1212.52	978.996	1407.18	1323.49	1393.92	1451.09	10.113	10.1262	9.88571	10.5548	10.499	10.5507	10.5415	P	P	P	P	M	M	M	noncoding	AK123669		misc_RNA	2155	chr15	+	72882031	72884186	ATCTAATTGCTGGTCTTCCTGGTATGAACAAAGATGTTTGCTTGTTAATAAATTCCTACC	intergenic
ASHG19A3A025858	22.5635	17.6182	17.5455	32.2503	5.63456	20.5022	14.4913	4.6624	4.44887	4.3818	4.83347	2.49355	4.19925	3.49811	A	P	P	A	A	M	M	noncoding	uc003hxh.1	AK094561	UCSC_knowngene	869	chr4	+	105412121	105597345	AAATAGTCTAGATTTTGAAGACCCTGCTTTGGCTGAGATGAGGCCAGCATTGGAGTAGAA	natural antisense	NM_025212	CXXC4	CXXC-type zinc finger protein 4	-	105393342	105412467
ASHG19A3A014034	43.4906	46.9809	34.7566	68.1173	36.7573	30.0102	53.8715	5.58751	5.72745	5.32449	5.95739	5.10319	4.7795	5.54807	P	P	P	P	M	M	M	noncoding	ENST00000414112	AC009237.5	Ensembl	510	chr2	-	96161769	96162279	ATTGTTGATGCTGATCAAATTTCCCTTATATACACCATCCATAATTGCTCCTTCTCACCT	intergenic
ASHG19A3A047452	64.8459	55.0322	51.4594	104.764	126.726	123.406	94.6909	6.14803	5.9344	5.86884	6.6028	6.96134	6.88769	6.38765	P	P	P	P	M	M	M	noncoding	ENST00000435049	RP11-46F15.2	Ensembl	622	chr1	-	3539753	3541307	ACAGCTGCAAGCTGTAGTCAGTGATGGGCAACTGGAACCAGAGATTCCAGAGAGAGGGAG	bidirectional	NM_182752	TPRG1L	tumor protein p63-regulated gene 1-like protein	+	3541555	3546694
ASHG19A3A037844	27.7339	23.3996	24.406	52.709	28.3465	12.6904	27.5871	4.95747	4.80341	4.8363	5.57575	4.71637	3.42755	4.52493	A	P	P	P	M	A	M	noncoding	ENST00000457720	RP11-217B7.3	Ensembl	606	chr9	-	107753076	107754062	TTTTTAACTGGCAAGGTTTCGAGTTCCCAACCACAGCACCCTCAGTGATGGTTTTCAGAA	intergenic
ASHG19A3A024616	37.4209	32.4905	42.5009	112.412	70.6448	55.752	66.385	5.376	5.23659	5.60714	6.70279	6.0835	5.7055	5.86	P	P	P	P	M	M	M	noncoding	ENST00000513690	RP11-380D23.2	Ensembl	446	chr4	-	111516670	111536614	TGCAACCACCACCTCGGTTCCACTCAACCGATTTTTGCTGCATGTCAACACTTATTACCG	intergenic
ASHG19A3A031643	406.953	395.084	333.545	706.43	663.294	689.605	695.803	8.65782	8.6161	8.4297	9.50645	9.47371	9.49602	9.43077	P	P	P	P	M	M	M	noncoding	uc003pce.2	AK056584	UCSC_knowngene	3102	chr6	+	53794843	53862463	CCCAGTCTTTGCTTTATGTACAAATACCCTGGTTTCTAAATGCTACTTATTTTCTTCAGA	intergenic
ASHG19A3A007730	205.053	198.811	182.994	101.261	98.3407	100.425	109.392	7.73348	7.68498	7.61343	6.55078	6.57466	6.57741	6.60923	P	P	P	P	M	M	M	noncoding	NR_033196	ZFAND1	RefSeq_NR	691	chr8	-	82615149	82633539	TGTGATGATTGTTCAGGAATATTTTGGTGACTGTAATCAATGAGAGACTGAAGACAGATC	exon sense-overlapping	NM_001170797	ZFAND1	AN1-type zinc finger protein 1 isoform c	-	82615148	82633539
ASHG19A3A007730	205.053	198.811	182.994	101.261	98.3407	100.425	109.392	7.73348	7.68498	7.61343	6.55078	6.57466	6.57741	6.60923	P	P	P	P	M	M	M	noncoding	NR_033196	ZFAND1	RefSeq_NR	691	chr8	-	82615149	82633539	TGTGATGATTGTTCAGGAATATTTTGGTGACTGTAATCAATGAGAGACTGAAGACAGATC	exon sense-overlapping	NM_024699	ZFAND1	AN1-type zinc finger protein 1 isoform a	-	82613565	82633539
ASHG19A3A007730	205.053	198.811	182.994	101.261	98.3407	100.425	109.392	7.73348	7.68498	7.61343	6.55078	6.57466	6.57741	6.60923	P	P	P	P	M	M	M	noncoding	NR_033196	ZFAND1	RefSeq_NR	691	chr8	-	82615149	82633539	TGTGATGATTGTTCAGGAATATTTTGGTGACTGTAATCAATGAGAGACTGAAGACAGATC	exon sense-overlapping	NM_001170796	ZFAND1	AN1-type zinc finger protein 1 isoform b	-	82613565	82633539
ASHG19A3A032777	26062.8	26906.9	24507.2	14993.5	16067.8	17047.5	13920.9	14.4196	14.4952	14.3951	14.043	14.1749	14.2179	13.8486	P	P	P	P	M	M	M	noncoding	ENST00000455449	AC073115.5	Ensembl	532	chr7	-	46037138	46037670	TCACTTCCTAGATGAGGAAGTTAAACTCATCAAGAAGATGGGTGACCACCTGACCAACCT	intergenic
CUST_574_PI426073487	14.4314	5.76033	12.0327	42.2802	44.7639	51.7143	49.1624	4.029	2.95469	3.86611	5.23807	5.40025	5.59364	5.40685	A	A	A	P	M	M	M	noncoding	uc.95-	uc.95	UCR	251	chr2	-	171571529	171571780	GTGGGAAATGTATATACACAAATAATTGGATTTTCCTGATCAAAGGGGGCCTTGCCGCCT	bidirectional	NM_001003845	SP5	transcription factor Sp5	+	171571856	171574498
ASHG19A3L0000808	4120.19	4233.05	3700.45	4880.28	4923.47	4905.48	5135.67	11.8437	11.8982	11.7552	12.3751	12.4085	12.3792	12.3775	P	P	P	P	P	M	M	noncoding	AK226132	lincRNA-ZFP106	lincRNA	5684	chr15	-	42707320	42783303	TTTTCCAGGAAAGGCTCCAGTGGTTCTTACTTGATCCAAAAAATGTCAAGAATTAATCTA	exon sense-overlapping	NM_022473	ZFP106	zinc finger protein 106 homolog	-	42705020	42749730
ASHG19A3A050190	9565.34	9050.39	8084.74	5856.27	5614.07	5616.85	6427.38	13.029	12.9656	12.8511	12.644	12.6242	12.5902	12.7231	P	P	P	P	M	M	M	noncoding	ENST00000495613	RP11-480P3.1	Ensembl	1093	chr13	+	50746224	50747317	CCTAGGGCACAGAAAATTGCAGAACATCAGAGAAAGTATGAGCGAAAACGTGAAGAGTGA	intergenic
ASHG19A3A041211	297.345	262.463	249.353	237.804	211.692	192.702	221.203	8.22972	8.05439	8.02021	7.83957	7.73388	7.55974	7.67551	P	P	P	P	M	M	M	noncoding	AY927529		RNAdb	751	chrX	+	75392763	75393514	TGGGGGGAGCCACCGCGCCCGGCCTTGGGGGGAGCCTTGAACTCTTTTTCCTCCTTTCTA	exon sense-overlapping	NM_016500	CXorf26	hypothetical protein LOC51260	+	75392770	75398033
ASHG19A3A055098	1911.08	1640.73	1595.01	1538.27	1890.93	1863.07	1860.24	10.7509	10.5387	10.5563	10.6879	11.0143	10.9771	10.8974	P	P	P	M	M	M	M	noncoding	uc001odi.3	SLC22A20	UCSC_knowngene	1244	chr11	+	65003879	65009572	CGCCCGGCAGCCACCCCATCTGGGAAGGTCAAAGAAGGCTCTTCCAAGAAACATGTAGAA	intergenic
ASHG19A3A007622	32.5403	33.6054	27.2615	39.6502	23.0582	30.0096	54.8871	5.18131	5.2785	4.99446	5.14254	4.40294	4.77947	5.5766	P	P	P	M	M	M	M	noncoding	NR_028075	SCARF1	RefSeq_NR	3387	chr17	-	1537151	1549041	GTGACCCTGGCTGGCTGGGGCCCAGGGGTCCTGTGATACTGTGACAGGGGACTGTGTCTG	exon sense-overlapping	NM_145352	SCARF1	scavenger receptor class F member 1 isoform 5	-	1537151	1549041
ASHG19A3A007622	32.5403	33.6054	27.2615	39.6502	23.0582	30.0096	54.8871	5.18131	5.2785	4.99446	5.14254	4.40294	4.77947	5.5766	P	P	P	M	M	M	M	noncoding	NR_028075	SCARF1	RefSeq_NR	3387	chr17	-	1537151	1549041	GTGACCCTGGCTGGCTGGGGCCCAGGGGTCCTGTGATACTGTGACAGGGGACTGTGTCTG	exon sense-overlapping	NM_003693	SCARF1	scavenger receptor class F member 1 isoform 1	-	1537151	1549041
ASHG19A3A007622	32.5403	33.6054	27.2615	39.6502	23.0582	30.0096	54.8871	5.18131	5.2785	4.99446	5.14254	4.40294	4.77947	5.5766	P	P	P	M	M	M	M	noncoding	NR_028075	SCARF1	RefSeq_NR	3387	chr17	-	1537151	1549041	GTGACCCTGGCTGGCTGGGGCCCAGGGGTCCTGTGATACTGTGACAGGGGACTGTGTCTG	exon sense-overlapping	NM_145350	SCARF1	scavenger receptor class F member 1 isoform 3	-	1537151	1549041
ASHG19A3A028175	110.925	92.5989	94.8302	141.744	99.7125	108.134	215.378	6.89545	6.65006	6.71431	7.05121	6.5967	6.6868	7.63538	P	P	P	M	M	M	M	noncoding	uc001ebq.1	AK092511	UCSC_knowngene	2131	chr1	+	112282462	112290420	AGCCCTGCCCTCGCGGGCGGAGCAGAGACGCCGCCGCTTGGCCGGTTCACGCCTGTCACA	intronic antisense	NM_198926	C1orf183	hypothetical protein LOC55924 isoform 2	-	112264685	112298419
ASHG19A3A028175	110.925	92.5989	94.8302	141.744	99.7125	108.134	215.378	6.89545	6.65006	6.71431	7.05121	6.5967	6.6868	7.63538	P	P	P	M	M	M	M	noncoding	uc001ebq.1	AK092511	UCSC_knowngene	2131	chr1	+	112282462	112290420	AGCCCTGCCCTCGCGGGCGGAGCAGAGACGCCGCCGCTTGGCCGGTTCACGCCTGTCACA	bidirectional	NM_019099	C1orf183	hypothetical protein LOC55924 isoform 1	-	112264685	112282046
ASHG19A3A039741	32823.5	32570.1	29907.3	21055.2	23156.6	23914.1	24075.5	14.7599	14.7701	14.7013	14.5493	14.6902	14.7055	14.6535	P	P	P	M	M	M	M	noncoding	ENST00000449334	RP11-348H3.2	Ensembl	478	chr1	+	212997368	212997846	ATAACATTTCCCTGCAGGATTACATTGCAGTGAAGAAGTATGCCAAGCACCTGCCTCACA	intergenic
ASHG19A3A010531	8292.97	7919.9	7231.16	6206.51	5319.49	6154.11	6242.07	12.8257	12.7696	12.6845	12.7349	12.5334	12.7244	12.6772	P	P	P	M	M	M	M	noncoding	ENST00000423510	RP11-164O23.5	Ensembl	105	chr1	-	207323521	207323626	GAAAAAGAAGAAAGGTGGAAAAGGTGGTTGGTGATGAGAATATTCTTGTTGCAGGCTGTT	intergenic
ASHG19A3A016513	129.307	117.093	119.744	213.834	133.435	157.224	198.516	7.10477	6.96578	7.03344	7.67239	7.03596	7.25582	7.51317	P	P	P	M	M	M	M	noncoding	AK125488		misc_RNA	2371	chr2	+	160760474	160762841	TTTAAATCTCGTCTTTGCTGAGCACATAATGTGTACTTGAGGTGGCCTCCATCCTTGTTG	natural antisense	NM_002349	LY75	lymphocyte antigen 75 precursor	-	160659867	160761267
ASHG19A3A016513	129.307	117.093	119.744	213.834	133.435	157.224	198.516	7.10477	6.96578	7.03344	7.67239	7.03596	7.25582	7.51317	P	P	P	M	M	M	M	noncoding	AK125488		misc_RNA	2371	chr2	+	160760474	160762841	TTTAAATCTCGTCTTTGCTGAGCACATAATGTGTACTTGAGGTGGCCTCCATCCTTGTTG	natural antisense	NM_001198760	LY75-CD302	LY75-CD302 fusion protein isoform 2 precursor	-	160625138	160761267
ASHG19A3A016513	129.307	117.093	119.744	213.834	133.435	157.224	198.516	7.10477	6.96578	7.03344	7.67239	7.03596	7.25582	7.51317	P	P	P	M	M	M	M	noncoding	AK125488		misc_RNA	2371	chr2	+	160760474	160762841	TTTAAATCTCGTCTTTGCTGAGCACATAATGTGTACTTGAGGTGGCCTCCATCCTTGTTG	natural antisense	NM_001198759	LY75-CD302	LY75-CD302 fusion protein isoform 1 precursor	-	160625138	160761267
ASHG19A3A016564	8055.63	7950.6	7122.74	5532.85	5835.63	5787.36	5767.43	12.782	12.7778	12.6631	12.5629	12.6798	12.6296	12.5555	P	P	P	M	M	M	M	noncoding	AK124958		misc_RNA	1922	chr2	+	170495991	170497913	GTGGAAGGAAAAAACATAAATGAAGTTAATGCACTTCTTTTCCTAGCCCAAAAGTCACTG	intergenic
ASHG19A3A030044	50.7927	43.604	41.4059	77.6126	77.1662	65.2106	82.0812	5.80461	5.62466	5.57021	6.15713	6.21588	5.94359	6.17929	P	P	P	M	M	M	M	noncoding	ENST00000394808	RP1-34L19.1	Ensembl	2100	chr6	-	53071395	53073495	ATAAAGGGCACATACACAGAATATGGCTTTGGCCTCTTCAACAACCATCAGCTTGGAACC	intergenic
ASHG19A3A021805	82.0268	78.3814	81.0907	78.4235	80.5033	47.9183	90.1321	6.4856	6.41668	6.50145	6.174	6.2794	5.48081	6.3162	P	P	P	M	M	M	M	noncoding	ENST00000486545	RP11-439C8.2	Ensembl	521	chr3	-	154687071	154688012	CTGTTGATTGCGATTTCTGTTTGAAAATGGAATCTTGAGCATCTGTTCTCTCCTTTTATA	intergenic
ASHG19A3A050124	32.5718	17.256	37.0847	31.6243	38.4442	31.0129	33.4781	5.18267	4.42505	5.41774	4.80656	5.17248	4.82712	4.82576	A	P	P	M	M	M	M	noncoding	ENST00000501704	AL356107.2	Ensembl	2335	chr13	+	45007660	45150392	GAGTAACGCTAGTTATCTGGAAGCCACTTTTCTTTTTCATTTGAGTTCCGCCTGGCGCAA	natural antisense	NM_006022	TSC22D1	TSC22 domain family protein 1 isoform 2	-	45007658	45010979
ASHG19A3A050124	32.5718	17.256	37.0847	31.6243	38.4442	31.0129	33.4781	5.18267	4.42505	5.41774	4.80656	5.17248	4.82712	4.82576	A	P	P	M	M	M	M	noncoding	ENST00000501704	AL356107.2	Ensembl	2335	chr13	+	45007660	45150392	GAGTAACGCTAGTTATCTGGAAGCCACTTTTCTTTTTCATTTGAGTTCCGCCTGGCGCAA	natural antisense	NM_183422	TSC22D1	TSC22 domain family protein 1 isoform 1	-	45007654	45150701
ASHG19A3A019800	42.5376	32.1994	41.9591	69.7979	100.04	81.7247	93.6188	5.55605	5.22411	5.58843	5.99606	6.59992	6.26854	6.37102	P	P	P	M	M	M	M	noncoding	NR_002821	LOC400927	RefSeq_NR	494	chr22	-	38740669	38794931	CTGCACCTGAGTACAGCACCCAGGCGTCTTCTGCAGCCCACAGAAGGTTCAGCTTAGGGC	intergenic
ASHG19A3A052906	14553.3	13459.8	13725.4	15513.6	16076.9	15473.1	16214	13.6061	13.5128	13.5859	14.1013	14.1765	14.0703	14.0721	P	P	P	M	M	M	M	noncoding	ENST00000399198	RP11-209K10.1	Ensembl	888	chr15	+	53176695	53178670	TGAAAAAGAAAAGCAGGCTGCTGTTGAAAAGGCTGTGACCAAGGAGGAATTTCAGGGTGA	intergenic
ASHG19A3A011089	518.398	453.164	476.122	984.292	1208.35	1118.79	1224.31	8.97671	8.79965	8.90083	10.0162	10.3579	10.2281	10.293	P	P	P	P	M	M	M	noncoding	BC128553		misc_RNA	172	chr19	-	12786183	12786329	TTATCTGTGGCTGGGCTGTACCCTGGTTTCTGAGGTCCCTGGGCACCCCCCATCTCAGTC	intronic antisense	NM_001099737	WDR83	WD repeat domain-containing protein 83	+	12777617	12786646
ASHG19A3A011089	518.398	453.164	476.122	984.292	1208.35	1118.79	1224.31	8.97671	8.79965	8.90083	10.0162	10.3579	10.2281	10.293	P	P	P	P	M	M	M	noncoding	BC128553		misc_RNA	172	chr19	-	12786183	12786329	TTATCTGTGGCTGGGCTGTACCCTGGTTTCTGAGGTCCCTGGGCACCCCCCATCTCAGTC	intronic antisense	NM_032332	WDR83	WD repeat domain-containing protein 83	+	12780516	12786646
ASHG19A3A013556	32.5658	19.3859	18.7356	132.538	409.337	110.2	453.963	5.18234	4.56737	4.4758	6.94892	8.72194	6.71296	8.77116	A	P	P	P	M	M	M	noncoding	uc002rsu.1	CR600703	UCSC_knowngene	2156	chr2	-	43254991	43266682	AGAGTGAAAAAATGTTAAGCAGTGGAAAAACATGAACCAAACTGTGGCTGCATCTTCCCA	intergenic
ASHG19A3A012854	5715.09	5684.09	5100.28	8280.5	8327.7	8379.09	8723.14	12.3106	12.3201	12.2019	13.1539	13.2056	13.1617	13.1673	P	P	P	P	M	M	M	noncoding	uc002pik.2	BC033836	UCSC_knowngene	1943	chr19	+	48758945	48761444	CCGCCCAAGAATGATTGTTAATTTCCGTCCATCATTTTCCTTTGATTGTTCTTCATCTCG	natural antisense	NM_001184904	CARD8	caspase recruitment domain-containing protein 8	-	48741517	48759203
ASHG19A3A012854	5715.09	5684.09	5100.28	8280.5	8327.7	8379.09	8723.14	12.3106	12.3201	12.2019	13.1539	13.2056	13.1617	13.1673	P	P	P	P	M	M	M	noncoding	uc002pik.2	BC033836	UCSC_knowngene	1943	chr19	+	48758945	48761444	CCGCCCAAGAATGATTGTTAATTTCCGTCCATCATTTTCCTTTGATTGTTCTTCATCTCG	natural antisense	NM_001184902	CARD8	caspase recruitment domain-containing protein 8	-	48711342	48759203
ASHG19A3A023597	25.2234	26.4023	29.4923	30.0307	45.0791	38.6486	71.6854	4.82599	4.95946	5.10362	4.72566	5.41277	5.15952	5.97229	A	P	P	M	M	M	M	noncoding	NR_004053	SOX2OT	RefSeq_NR	2529	chr3	+	181328150	181459003	TCGCTTTTTTACCTGCCAATCAAACTGCTACAAGACAACACCCTGATCTGGCATGGACAT	intron sense-overlapping	NM_003106	SOX2	transcription factor SOX-2	+	181429711	181432223
ASHG19A3A030032	18.0183	11.5143	12.3572	20.1288	20.0908	24.9338	27.8853	4.33742	3.93854	3.90158	4.11432	4.20204	4.50011	4.54372	A	A	A	P	M	M	M	noncoding	ENST00000424144	RP11-392A23.3	Ensembl	577	chr6	-	52670410	52678258	ATGCAAAGCTTGCCCTGATCAGAGGGAACAACAAGCCATTATTTTCCTGTCTTTGAAACT	intergenic
ASHG19A3A020145	52.959	45.7732	44.1787	45.7238	42.5998	39.203	55.8703	5.86499	5.6912	5.6617	5.35906	5.32377	5.18024	5.6027	P	P	P	M	M	M	M	noncoding	ENST00000457627	AP000552.7	Ensembl	309	chr22	+	21648619	21648928	ACACAGAGAAGGATGTGACATGCCTGGGCCATGGAGCACTCTGAGATCTCATCGGGGACA	intergenic
ASHG19A3A033174	185.966	192.011	170.557	457.514	491.365	498.176	528.988	7.60186	7.6359	7.51394	8.84418	9.01442	9.00548	9.00727	P	P	P	M	M	M	M	noncoding	ENST00000424151	AC006378.3	Ensembl	314	chr7	-	93594721	93597702	GGGTACAAACTGTATTTCCAACACTTCTAGCCCTATATATACCTGTCAATGATATTATAC	intergenic
CUST_938_PI426073487	1635.82	1516.72	1320.17	715.28	1200.32	764.071	1201.79	10.5306	10.4306	10.2913	9.52619	10.3492	9.64738	10.2585	P	P	P	M	M	M	M	noncoding	uc.459-	uc.459	UCR	255	chrX	-	21534559	21534814	TTCAACTGCCACCCCACCTGGTAACCAGCAAAATCATTACAATAAAATTGAGGTACAGTA	natural antisense	NM_001168647	CNKSR2	connector enhancer of kinase suppressor of ras 2	+	21392535	21672813
CUST_938_PI426073487	1635.82	1516.72	1320.17	715.28	1200.32	764.071	1201.79	10.5306	10.4306	10.2913	9.52619	10.3492	9.64738	10.2585	P	P	P	M	M	M	M	noncoding	uc.459-	uc.459	UCR	255	chrX	-	21534559	21534814	TTCAACTGCCACCCCACCTGGTAACCAGCAAAATCATTACAATAAAATTGAGGTACAGTA	intronic antisense	NM_001168649	CNKSR2	connector enhancer of kinase suppressor of ras 2	+	21392535	21660980
CUST_938_PI426073487	1635.82	1516.72	1320.17	715.28	1200.32	764.071	1201.79	10.5306	10.4306	10.2913	9.52619	10.3492	9.64738	10.2585	P	P	P	M	M	M	M	noncoding	uc.459-	uc.459	UCR	255	chrX	-	21534559	21534814	TTCAACTGCCACCCCACCTGGTAACCAGCAAAATCATTACAATAAAATTGAGGTACAGTA	natural antisense	NM_001168648	CNKSR2	connector enhancer of kinase suppressor of ras 2	+	21392535	21660980
CUST_938_PI426073487	1635.82	1516.72	1320.17	715.28	1200.32	764.071	1201.79	10.5306	10.4306	10.2913	9.52619	10.3492	9.64738	10.2585	P	P	P	M	M	M	M	noncoding	uc.459-	uc.459	UCR	255	chrX	-	21534559	21534814	TTCAACTGCCACCCCACCTGGTAACCAGCAAAATCATTACAATAAAATTGAGGTACAGTA	natural antisense	NM_014927	CNKSR2	connector enhancer of kinase suppressor of ras 2	+	21392535	21672813
ASHG19A3A019482	51.3109	38.7818	48.5233	62.4467	78.2364	67.7235	80.0248	5.81755	5.47024	5.79044	5.82709	6.23535	5.99821	6.14405	P	P	P	P	M	M	M	noncoding	ENST00000415503	AC006547.13	Ensembl	508	chr22	-	20050502	20053600	AAAGGCCTCGAAATGCGCTCACCAAAGCCTCAGAGTTTTATTATCAGGAGCTCACATTCA	natural antisense	NM_152906	C22orf25	hypothetical protein LOC128989	+	20008630	20053447
ASHG19A3A035309	118.1	114.053	107.053	19.4312	22.3218	25.3819	19.4627	6.9839	6.92981	6.88122	4.05675	4.35368	4.52475	3.9809	P	P	P	P	M	M	M	noncoding	AL359058		misc_RNA	910	chr7	+	150038859	150039693	TGGAATTCATAAGGTGAGCAGAAACTCAAGGAAAACTGTCCAAATACCGGCTCGACTCCT	bidirectional	NM_002889	RARRES2	retinoic acid receptor responder protein 2	-	150035406	150038763
ASHG19A3A041920	34.0939	21.4827	23.2021	44.5207	41.0586	40.5529	53.3616	5.25041	4.69457	4.76491	5.32019	5.27212	5.22743	5.53527	A	P	P	P	M	M	M	noncoding	NR_001542	TTTY10	RefSeq_NR	1628	chrY	-	22627553	22681114	AGTGTAAGGTTGCTTCATTTCATGGGCCCACCCAGGATTTAAAGGTGTATTCCCTGAAAG	intergenic
ASHG19A3A007454	48.5775	45.4763	43.0009	115.08	107.797	106.66	114.286	5.74265	5.68237	5.62405	6.73535	6.71372	6.66824	6.67531	P	P	P	P	M	M	M	noncoding	NR_026986	LOC339524	RefSeq_NR	3229	chr1	+	87597608	87602350	AGCGGCATCATTACAAGGGTGTGGGCACCAGATACTGCTACACCATCTCATCGGCATGGA	intergenic
CUST_298_PI426073487	59.3849	50.1401	51.1136	45.1963	56.7784	47.8377	59.4401	6.02452	5.81086	5.86049	5.34293	5.75873	5.47849	5.69445	P	P	P	M	M	M	M	noncoding	uc.300+	uc.300	UCR	208	chr10	+	102547117	102547325	CAGGGGCAGCTCTTGGCAAGGTGAAAGAAAATTGCATATTCAATCTCCATCCATGAATCT	intron sense-overlapping	NM_003989	PAX2	paired box protein Pax-2 isoform d	+	102505467	102589698
CUST_298_PI426073487	59.3849	50.1401	51.1136	45.1963	56.7784	47.8377	59.4401	6.02452	5.81086	5.86049	5.34293	5.75873	5.47849	5.69445	P	P	P	M	M	M	M	noncoding	uc.300+	uc.300	UCR	208	chr10	+	102547117	102547325	CAGGGGCAGCTCTTGGCAAGGTGAAAGAAAATTGCATATTCAATCTCCATCCATGAATCT	intron sense-overlapping	NM_003988	PAX2	paired box protein Pax-2 isoform c	+	102505467	102589698
CUST_298_PI426073487	59.3849	50.1401	51.1136	45.1963	56.7784	47.8377	59.4401	6.02452	5.81086	5.86049	5.34293	5.75873	5.47849	5.69445	P	P	P	M	M	M	M	noncoding	uc.300+	uc.300	UCR	208	chr10	+	102547117	102547325	CAGGGGCAGCTCTTGGCAAGGTGAAAGAAAATTGCATATTCAATCTCCATCCATGAATCT	intron sense-overlapping	NM_000278	PAX2	paired box protein Pax-2 isoform b	+	102505467	102589698
CUST_298_PI426073487	59.3849	50.1401	51.1136	45.1963	56.7784	47.8377	59.4401	6.02452	5.81086	5.86049	5.34293	5.75873	5.47849	5.69445	P	P	P	M	M	M	M	noncoding	uc.300+	uc.300	UCR	208	chr10	+	102547117	102547325	CAGGGGCAGCTCTTGGCAAGGTGAAAGAAAATTGCATATTCAATCTCCATCCATGAATCT	intron sense-overlapping	NM_003987	PAX2	paired box protein Pax-2 isoform a	+	102505467	102589698
CUST_298_PI426073487	59.3849	50.1401	51.1136	45.1963	56.7784	47.8377	59.4401	6.02452	5.81086	5.86049	5.34293	5.75873	5.47849	5.69445	P	P	P	M	M	M	M	noncoding	uc.300+	uc.300	UCR	208	chr10	+	102547117	102547325	CAGGGGCAGCTCTTGGCAAGGTGAAAGAAAATTGCATATTCAATCTCCATCCATGAATCT	intron sense-overlapping	NM_003990	PAX2	paired box protein Pax-2 isoform e	+	102505467	102589698
ASHG19A3A029620	27.4255	22.6692	22.0997	11.8824	13.2636	17.3197	24.2088	4.94227	4.76092	4.70018	3.27467	3.53682	3.93436	4.32893	A	P	P	M	A	M	A	noncoding	ENST00000457298	GPR53P	Ensembl	1084	chr6	-	29505480	29506564	TAAAGTTGTTCTCCCAAGAGCTTTGTTGAATGAGATGGAAGGTGGAGGAAACAAGGGGTT	intergenic
ASHG19A3A054030	29.8945	31.631	30.2321	15.3114	33.8085	25.7124	32.563	5.06494	5.19716	5.13848	3.68364	4.97665	4.54421	4.78628	P	P	P	M	M	M	M	noncoding	uc010chq.2	DKFZp434O0320	UCSC_knowngene	1531	chr16	-	86365455	86371167	GAAGGAAAATAAGGCAGGGAAACAGGCTGGAGACTGCGGGTGCTGCGTGATGTTGTTTAG	intergenic
ASHG19A3H0000202	788.914	786.148	725.72	65.8366	61.8413	73.691	71.5998	9.53531	9.53157	9.47401	5.90338	5.88971	6.12425	5.9707	P	P	P	M	M	M	M	noncoding	nc-HOXD9-16-	nc-HOXD9-16	HOX cluster	558	chr2	+	176984428	176984986	ATTAAGAAAACCCACAAGTTGGAGGGAGGGGGACTTAAAAAGCACATTACAATGTATCTT	exon sense-overlapping	NM_002148	HOXD10	homeobox protein Hox-D10	+	176981491	176984670
ASHG19A3L0001991	20.2951	21.2692	18.1917	28.3207	32.7372	28.7207	34.4922	4.51051	4.68273	4.43294	4.63658	4.92935	4.71247	4.87456	A	P	P	P	M	M	M	noncoding	DB340652	lincRNA-FBXO32-1	lincRNA	533	chr8	-	124629184	124629717	CAAGCAAACTTACCCTGTCTATATTTACAAGGTAAAAACCCCAGAAGCACTACAGCACAC	intergenic
ASHG19A3A053297	3759.5	4463.93	3594.73	3064.93	5219.64	5370.25	5313.94	11.7084	11.9767	11.7181	11.6848	12.5043	12.5143	12.4252	P	P	P	M	M	M	M	noncoding	uc010box.2	DJ031154	UCSC_knowngene	950	chr15	+	100348034	100379278	CCCCCTCCCTTGTATCAAATATTGTCTCTGATAATAATACATTGAGTTATTTGTAGTTCC	intergenic
ASHG19A3A036652	12.0448	9.31522	14.8892	41.0737	21.1479	23.9819	34.369	3.76944	3.69286	4.16146	5.19534	4.27844	4.44331	4.86865	A	A	A	M	M	M	M	noncoding	BC040302		misc_RNA	3240	chr8	+	64378406	64388039	TGAAGAATAAATGAGTGCTCTGCCAGTTCAAAGTCAATGTGAAGATTGGATGGGGAAGCG	intergenic
ASHG19A3A043310	159124	188062	136074	123296	136141	136994	129194	17.0153	17.3562	16.9069	17.1196	17.2061	17.1887	17.0994	P	P	P	M	M	M	M	noncoding	ENST00000430685	RP11-214N15.5	Ensembl	241	chr10	-	114308390	114308631	AAATTCTTAAAGTCTGGTGATGCTGCCATTGTTGGTATGGTTCCTGGCAAGCCCATGTGT	intronic antisense	NM_145206	VTI1A	vesicle transport through interaction with	+	114206755	114578504
ASHG19A3A051762	23262.3	18624.2	18704.3	19387.7	20579.9	16329.2	18238.2	14.2637	13.9782	14.029	14.4428	14.5115	14.1609	14.2347	P	P	P	P	M	M	M	noncoding	ENST00000448875	AL162151.3	Ensembl	158	chr14	+	99439650	99439808	TAAGGATGACCCGTCCAAGCCGGTCCACCTCACAGCCTTCCTGGGATACAAGGCTGGCAT	intergenic
ASHG19A3A029987	2665.1	2217.9	2184.96	768.517	904.567	702.004	894.363	11.2208	10.9737	11.0056	9.64137	9.93494	9.52418	9.81714	P	P	P	P	M	M	M	noncoding	ENST00000434225	RBMXP1	Ensembl	306	chr6	-	48180387	48181905	ATGATCATGATCATGACTATTCAGATCATCCAAGTGGAAGTTCCTACAGAGATTCATATG	intergenic
ASHG19A3A052493	29.4265	18.7446	24.9224	61.154	21.9854	19.0758	26.0902	5.04211	4.52693	4.86458	5.79587	4.33192	4.08758	4.44167	A	M	P	P	P	M	M	noncoding	ENST00000400817	AC103965.1	Ensembl	2545	chr15	-	84868063	84898722	GTGTGTCCTTGCATGGCCTATGAAGTGTGTTGTGGGATAACCGTGTGTATTGAACTCTCA	intergenic
ASHG19A3A028799	36.2266	30.7076	23.4222	806.975	248.681	829.798	262.104	5.33326	5.15757	4.7787	9.71812	7.98549	9.76836	7.93794	A	P	P	P	M	M	M	noncoding	ENST00000509051	CTB-49A3.2	Ensembl	466	chr5	+	132496129	132559995	GGGAATAGAACCCTTGGAGCGTGTAGATGGGATACCACGGTCTTCCAGCTCCTATTGCAG	natural antisense	NM_015082	FSTL4	follistatin-related protein 4 precursor	-	132532151	132948223
ASHG19A3A053974	30.3495	19.6458	19.0009	79.8614	72.4093	76.9172	76.8611	5.08376	4.58441	4.49741	6.20338	6.11822	6.18271	6.07983	A	P	P	P	M	M	M	noncoding	AK021766		misc_RNA	2030	chr16	-	79709581	79711612	CTGAGTTCTTCTATACTTCACCATGGATACATGAACCTTAGCCCTAATGGAGCCTTAGAA	intergenic
ASHG19A3A028400	5	6.1874	5	33.8206	24.4278	25.8596	28.417	2.37766	3.25248	2.39437	4.90168	4.48828	4.5538	4.57429	A	A	A	P	M	M	M	noncoding	AK094995		misc_RNA	2169	chr5	+	75627661	75629778	GGCTCGTGTACAGCATAAATCTATCAAACTTGGAATTGTGTATACATTTATATGCCAGAT	intergenic
ASHG19A3L0003312	69.0288	61.7498	60.2876	55.9884	36.3901	28.9224	42.2084	6.24012	6.09113	6.08632	5.65801	5.08762	4.72335	5.18114	P	P	P	P	M	M	M	noncoding	BE796744	lincRNA-ZPLD1-1	lincRNA	961	chr3	-	104348945	104626311	TTTTTTAGCGACAGAAAATCTCACCCTATATCCAATGGGGGTTCACCACCATGATGGCGT	intergenic
ASHG19A3A019247	25.7459	12.194	16.3787	34.4624	15.6797	6.50321	19.0317	4.85798	4.00377	4.29313	4.93208	3.81289	2.58837	3.945	A	P	A	P	M	A	M	noncoding	AJ001905		misc_RNA	540	chr21	+	39549996	39550520	AATCAGTGGGGATTGGATTTTGCCCTGACCTGGATAAAAGGACACTTCATCACAGCAACA	intergenic
ASHG19A3A014332	117.017	125.909	108.087	137.122	80.7439	43.7714	84.6072	6.96944	7.06571	6.8957	6.99864	6.28341	5.3448	6.22421	P	P	P	P	M	M	M	noncoding	uc002tpy.1	AK095330	UCSC_knowngene	3793	chr2	-	130783575	130789491	CCCATTATAAATACCTTCCACTATGATGGGCTTATATTCTCCTATTCTCCTCTAGCACTT	intergenic
ASHG19A3A032051	47.9368	47.2917	36.5242	41.8243	42.9981	41.5698	42.7311	5.72407	5.73723	5.39927	5.22198	5.33846	5.26684	5.20055	P	P	P	P	M	M	M	noncoding	HIT000067352		H-invDB	621	chr6	+	127617334	127620368	AAGCAAAGTCAAAAAACAAGCTGAGCAAATATATGCAAAACACTTCACAGATAATGACAT	intronic antisense	NM_001105544	ECHDC1	enoyl-CoA hydratase domain-containing protein 1	-	127609856	127664754
ASHG19A3A032051	47.9368	47.2917	36.5242	41.8243	42.9981	41.5698	42.7311	5.72407	5.73723	5.39927	5.22198	5.33846	5.26684	5.20055	P	P	P	P	M	M	M	noncoding	HIT000067352		H-invDB	621	chr6	+	127617334	127620368	AAGCAAAGTCAAAAAACAAGCTGAGCAAATATATGCAAAACACTTCACAGATAATGACAT	intronic antisense	NM_001002030	ECHDC1	enoyl-CoA hydratase domain-containing protein 1	-	127609856	127664754
ASHG19A3A032051	47.9368	47.2917	36.5242	41.8243	42.9981	41.5698	42.7311	5.72407	5.73723	5.39927	5.22198	5.33846	5.26684	5.20055	P	P	P	P	M	M	M	noncoding	HIT000067352		H-invDB	621	chr6	+	127617334	127620368	AAGCAAAGTCAAAAAACAAGCTGAGCAAATATATGCAAAACACTTCACAGATAATGACAT	intronic antisense	NM_001139510	ECHDC1	enoyl-CoA hydratase domain-containing protein 1	-	127609856	127663552
ASHG19A3A032051	47.9368	47.2917	36.5242	41.8243	42.9981	41.5698	42.7311	5.72407	5.73723	5.39927	5.22198	5.33846	5.26684	5.20055	P	P	P	P	M	M	M	noncoding	HIT000067352		H-invDB	621	chr6	+	127617334	127620368	AAGCAAAGTCAAAAAACAAGCTGAGCAAATATATGCAAAACACTTCACAGATAATGACAT	intronic antisense	NM_001105545	ECHDC1	enoyl-CoA hydratase domain-containing protein 1	-	127609856	127664754
ASHG19A3A032051	47.9368	47.2917	36.5242	41.8243	42.9981	41.5698	42.7311	5.72407	5.73723	5.39927	5.22198	5.33846	5.26684	5.20055	P	P	P	P	M	M	M	noncoding	HIT000067352		H-invDB	621	chr6	+	127617334	127620368	AAGCAAAGTCAAAAAACAAGCTGAGCAAATATATGCAAAACACTTCACAGATAATGACAT	intronic antisense	NM_018479	ECHDC1	enoyl-CoA hydratase domain-containing protein 1	-	127609856	127664754
ASHG19A3A033250	74.6609	71.1423	64.9663	77.5207	39.507	45.7048	42.3163	6.35404	6.28508	6.18762	6.15466	5.21171	5.41004	5.18643	P	P	P	P	M	M	M	noncoding	HIT000012886		H-invDB	1865	chr7	-	99791583	99793447	AATAATAACCCCTCTGCATGTGGTTATTCGGACTATTCAGAAGCCCTAGCTGGCATTATA	natural antisense	NM_012447	STAG3	cohesin subunit SA-3	+	99775537	99812010
ASHG19A3A026462	4121.91	4324.43	3703.64	7223.26	7531.87	7307.52	7458.31	11.8453	11.9306	11.7569	12.9576	13.0514	12.9634	12.9301	P	P	P	P	P	M	M	noncoding	ENST00000512318	SDHAP3	Ensembl	985	chr5	-	1568779	1593402	GTTGTGGGAAAATCAGCAAGCTCTACGGAGACCTAAAGCACCTGAAGACGTTCGACCGGG	intergenic
ASHG19A3A032454	474.065	449.718	407.603	563.369	602.418	610.863	596.474	8.85933	8.78913	8.70489	9.17042	9.3197	9.30831	9.19346	P	P	P	P	P	M	M	noncoding	ENST00000342275	RP11-740N7.1	Ensembl	897	chr7	-	6874471	6920187	TCAAACTCTCAGAGGATCCAGAACTGCAGCCGGTCGTTGCTGGGCTGTTCCTGTCCATGT	intergenic
ASHG19A3A024370	95936.3	92499.6	83709.9	63251.3	66735.2	62476.4	56741.3	16.2646	16.2579	16.1694	16.1802	16.2103	16.0888	15.8999	P	P	P	P	P	M	M	noncoding	ENST00000510190	RP11-123J14.2	Ensembl	310	chr4	-	77880012	77880322	CAAAAGGTGGGTGAATTTTCTGGGGCCAATAAGGAAAAGCTTGAAGCCACCATAATGAAT	intronic antisense	NM_018243	41528	septin-11	+	77870894	77959768
ASHG19A3A015758	34.5733	18.6014	26.0951	61.5976	26.2254	15.7712	10.2442	5.26851	4.51771	4.93508	5.80716	4.59354	3.78494	2.97043	A	P	P	A	M	M	M	noncoding	ENST00000452716	AC023115.3	Ensembl	1074	chr2	+	67313577	67523207	AGACTTGAATGGACTGAAACCACCTGGTCACCACTAGAAGCTACATCAAGGAAAAGAAAG	intergenic
ASHG19A3A026979	507.459	497.413	456.691	208.345	170.502	185.668	189.439	8.94659	8.91896	8.84798	7.63343	7.40747	7.50497	7.43861	P	P	P	P	P	M	M	noncoding	AK058164		RNAdb	1433	chr5	-	76721767	76723199	CTGACAGCCACATTTTTAAAAATATATTTTGTTTACCTTTAGGCTCACCCTGTGTCACTA	natural antisense	NM_001029854	PDE8B	high affinity cAMP-specific and IBMX-insensitive	+	76506705	76724080
ASHG19A3A026979	507.459	497.413	456.691	208.345	170.502	185.668	189.439	8.94659	8.91896	8.84798	7.63343	7.40747	7.50497	7.43861	P	P	P	P	P	M	M	noncoding	AK058164		RNAdb	1433	chr5	-	76721767	76723199	CTGACAGCCACATTTTTAAAAATATATTTTGTTTACCTTTAGGCTCACCCTGTGTCACTA	natural antisense	NM_001029851	PDE8B	high affinity cAMP-specific and IBMX-insensitive	+	76506705	76724080
ASHG19A3A026979	507.459	497.413	456.691	208.345	170.502	185.668	189.439	8.94659	8.91896	8.84798	7.63343	7.40747	7.50497	7.43861	P	P	P	P	P	M	M	noncoding	AK058164		RNAdb	1433	chr5	-	76721767	76723199	CTGACAGCCACATTTTTAAAAATATATTTTGTTTACCTTTAGGCTCACCCTGTGTCACTA	natural antisense	NM_003719	PDE8B	high affinity cAMP-specific and IBMX-insensitive	+	76506705	76724080
ASHG19A3A026979	507.459	497.413	456.691	208.345	170.502	185.668	189.439	8.94659	8.91896	8.84798	7.63343	7.40747	7.50497	7.43861	P	P	P	P	P	M	M	noncoding	AK058164		RNAdb	1433	chr5	-	76721767	76723199	CTGACAGCCACATTTTTAAAAATATATTTTGTTTACCTTTAGGCTCACCCTGTGTCACTA	natural antisense	NM_001029853	PDE8B	high affinity cAMP-specific and IBMX-insensitive	+	76506705	76724080
ASHG19A3A026979	507.459	497.413	456.691	208.345	170.502	185.668	189.439	8.94659	8.91896	8.84798	7.63343	7.40747	7.50497	7.43861	P	P	P	P	P	M	M	noncoding	AK058164		RNAdb	1433	chr5	-	76721767	76723199	CTGACAGCCACATTTTTAAAAATATATTTTGTTTACCTTTAGGCTCACCCTGTGTCACTA	natural antisense	NM_001029852	PDE8B	high affinity cAMP-specific and IBMX-insensitive	+	76506705	76724080
ASHG19A3A032544	231.605	227.652	199.685	493.639	468.105	407.615	488.319	7.89837	7.86798	7.72892	8.97096	8.93935	8.68967	8.88666	P	P	P	P	M	M	M	noncoding	ENST00000421730	AC005682.8	Ensembl	675	chr7	-	22928989	22980809	TCTATGGGCCATGCACCAGTGGCGGATTATTTGTCATATCAGAAGCACAGGCAAATTTAG	intergenic
ASHG19A3A021396	739.297	606.141	663.722	199.252	296.19	317.525	326.402	9.44747	9.18148	9.3559	7.56777	8.24293	8.32015	8.26981	P	P	P	M	M	M	P	noncoding	ENST00000498515	RP11-696F10.1	Ensembl	228	chr3	-	109696386	109696614	AAGAAAAAAGAGATGCTGCAGATGGCATGTGCCTAGTGTCACAGCAACTGCTGTATTCAG	intergenic
ASHG19A3A042850	23.081	21.8148	10.2603	33.4361	18.6862	16.0613	45.588	4.69854	4.71216	3.65135	4.88474	4.09556	3.81652	5.29472	A	P	A	M	M	M	M	noncoding	ENST00000441001	RP11-491H19.1	Ensembl	477	chr10	-	63541513	63581004	AAAGGTAGCTAGATGGAGGATGGTTCTCCTCATTCCGCAGATGATGAACTTGAAACCAGT	intergenic
ASHG19A3A043572	218.419	209.167	222.933	402.432	185.899	217.404	385.682	7.81429	7.75504	7.87009	8.6443	7.53612	7.74228	8.52229	P	P	P	P	M	M	P	noncoding	ENST00000417112	RP11-554I8.2	Ensembl	917	chr10	+	6779343	6780988	TGACTTTTGGAAATCTGATTGACTGGCACACTCTCTCTGCCTCTTTCTTTCTCAACATTT	intergenic
ASHG19A3A044034	2866.67	2815.59	2645.79	816.529	898.952	1003.81	1174.67	11.3323	11.2968	11.2747	9.73606	9.92635	10.0621	10.2239	P	P	P	M	M	M	M	noncoding	ENST00000415623	RP11-9E13.4	Ensembl	438	chr10	+	70184316	70184754	GGTACTCACCCAAACAAGGTGGTTATCACCAGGCTAAATCTCAACAAGGATCGGAAAAAA	intronic antisense	NM_001080449	DNA2	DNA2-like helicase	-	70173820	70231730
ASHG19A3A055194	240.062	205.667	197.173	286.04	246.943	128.419	272.696	7.94257	7.7327	7.71189	8.12371	7.97368	6.94511	8.00102	P	P	P	M	M	M	M	noncoding	uc003fif.1	AK127557	UCSC_knowngene	3125	chr3	-	172308502	172312373	GTCCCAGAAATCCCTAGTCCTCCATCAGAGaagcagctagtgtgtactgctctcacagag	intergenic
ASHG19A3A018962	63.0185	58.1518	53.5395	408.794	430.183	375.945	491.401	6.10574	6.01022	5.92092	8.66748	8.80045	8.56398	8.8976	P	P	P	M	M	M	M	noncoding	ENST00000423967	AP001058.3	Ensembl	463	chr21	-	45626407	45627282	ACAGCCAGGAGACTGATTTTGTATCCAGAAGTTTCTGTTTCACAATCACTAAACTACTCA	intergenic
ASHG19A3A049421	34.7806	30.3882	35.4403	39.1727	64.2872	50.9543	56.4564	5.27827	5.14418	5.35211	5.12549	5.94665	5.57069	5.61878	P	P	P	M	M	M	M	noncoding	ENST00000454681	RP11-141M1.3	Ensembl	844	chr13	-	33929342	34250905	TAAAAATGTAATGGAATTGCAGAGTTGTTGGCATTCAGATGTGTAGGTGGTGGGTGGCAA	intergenic
ASHG19A3A030902	3324.08	2899.65	2921.82	1703.54	3019.28	2581.81	3134.58	11.5419	11.3455	11.4169	10.834	11.7032	11.4479	11.6677	P	P	P	M	M	M	M	noncoding	AY927635		RNAdb	2188	chr6	+	3150252	3152439	ATTAAAATGGATTTTTCTAGAGTAACCACCAGATCACCTCCCCCACTCTCAGTCCGTTTT	intron sense-overlapping	NM_004332	BPHL	valacyclovir hydrolase precursor	+	3118925	3153432
ASHG19A3A018483	53.0883	40.5826	46.1523	34.5195	80.8599	47.9862	84.0322	5.86727	5.52835	5.72154	4.935	6.286	5.48309	6.215	P	P	P	P	M	M	M	noncoding	ENST00000366097	RP11-560A15.3	Ensembl	770	chr20	+	55689970	55697148	TCAGGTGGAGTCTGTGGTTCCCATGGTTCCTAGAGTGAGGACTCATCCTGCCAGATGGAG	intergenic
ASHG19A3A007974	1257.72	1290.09	1160.73	273.549	281.717	244.602	270.627	10.1639	10.2081	10.1182	8.05439	8.17426	7.92508	7.9882	P	P	P	P	M	M	M	noncoding	ENST00000450587	AC005324.4	Ensembl	669	chr17	-	15607545	15608214	TGAAGGGACCCCATATGCTGGAGGTCTGTTCCGCATGAAACTCCTGCTGGGGAAGGACTT	intronic antisense	NM_020652	ZNF286A	zinc finger protein 286A	+	15602890	15624100
ASHG19A3A007974	1257.72	1290.09	1160.73	273.549	281.717	244.602	270.627	10.1639	10.2081	10.1182	8.05439	8.17426	7.92508	7.9882	P	P	P	P	M	M	M	noncoding	ENST00000450587	AC005324.4	Ensembl	669	chr17	-	15607545	15608214	TGAAGGGACCCCATATGCTGGAGGTCTGTTCCGCATGAAACTCCTGCTGGGGAAGGACTT	intronic antisense	NM_001130842	ZNF286A	zinc finger protein 286A	+	15602890	15624100
ASHG19A3A050454	2249.34	2217.56	2038.03	1012.46	951.483	1002.69	1015.67	10.9924	10.9734	10.9088	10.0545	10.0096	10.0598	10.0118	P	P	P	P	M	M	M	noncoding	ENST00000423940	AL390877.1	Ensembl	420	chr1	-	118320708	118321128	CAAGCTAAACAGAACTATGCTGGTGCCAAATTTAGTGAGCCGCCATCACCAAGTGTTCTT	intergenic
ASHG19A3A022599	413.395	392.714	394.719	96.7357	214.915	162.384	209.174	8.68169	8.607	8.66073	6.48694	7.75584	7.30331	7.59406	P	P	P	P	M	M	M	noncoding	ENST00000422983	RP11-25O10.1	Ensembl	703	chr1	+	53038785	53039488	AGTTGCAATCTCATCGCTGGAATGTTCCAGCAGTTGAACAAACTGAGAAAGAATGCCTTT	intergenic
ASHG19A3A023795	47.6627	57.481	51.7983	68.5544	63.956	67.5177	76.4943	5.71551	5.99484	5.87696	5.96794	5.94081	5.99278	6.07383	P	P	P	M	M	M	M	noncoding	G36731		misc_RNA	465	chr3	+	197615948	197616413	AACCTGTAGATGAGTCATCTTTGAGGTACCAGGTGTTTCTTAACTCTCTCCAAGTCCTTC	natural antisense	NM_001134435	IQCG	IQ domain-containing protein G	-	197615947	197676796
ASHG19A3A023795	47.6627	57.481	51.7983	68.5544	63.956	67.5177	76.4943	5.71551	5.99484	5.87696	5.96794	5.94081	5.99278	6.07383	P	P	P	M	M	M	M	noncoding	G36731		misc_RNA	465	chr3	+	197615948	197616413	AACCTGTAGATGAGTCATCTTTGAGGTACCAGGTGTTTCTTAACTCTCTCCAAGTCCTTC	natural antisense	NM_032263	IQCG	IQ domain-containing protein G	-	197615945	197686886
ASHG19A3L0002300	108.967	91.0724	95.9655	93.8371	138.381	76.687	159.015	6.87219	6.6252	6.73141	6.44333	7.09222	6.1776	7.17603	P	P	P	M	M	M	M	noncoding	BG925695	lincRNA-CASK-2	lincRNA	461	chrX	-	43134151	43134491	TCATGGTTCTTCAGTGTCAAATGACTTTCCCCTCATTTCTGGAATCCATACGTAGGCATA	intergenic
ASHG19A3A022897	15.2834	5.41077	7.10465	18.9938	29.6881	23.7433	43.2018	4.10271	2.3801	3.17682	4.02416	4.78533	4.42672	5.21744	A	A	A	M	M	M	M	noncoding	ENST00000502817	OR5H3P	Ensembl	919	chr3	+	97926266	97927185	CATGACCTACAGCCTGAGAAACAAACAAGTAATAGCTTCATTCACAAAAATGTTCAAAAG	intergenic
ASHG19A3A041263	21.01	5.42058	15.5141	28.7334	13.5781	27.148	20.733	4.5582	2.40147	4.21888	4.66013	3.57204	4.62782	4.08151	A	P	A	M	A	M	M	noncoding	ENST00000426065	RP13-24G8.2	Ensembl	228	chrX	+	90677307	90677535	CTGGATGTGATGAAGAATCATCTGATGCATGCTGTGAGAGAAGAGGTGGAGATTCTGAAG	intergenic
ASHG19A3A016989	151774	160721	132260	115794	132583	98147.1	136394	16.935	17.1036	16.8726	17.0394	17.1668	16.7326	17.1887	P	P	P	M	M	M	M	noncoding	ENST00000456160	AC009974.11	Ensembl	467	chr2	+	219706321	219706788	TATATTTGACTGGCTCCTGATTACAATGCTTTGGATGTTGCCAACAAAATTGGGATCATC	intergenic
ASHG19A3A040520	44.2062	31.9898	30.1117	21.2092	21.7899	18.8581	28.3611	5.61059	5.21475	5.1324	4.19088	4.3202	4.06974	4.57121	P	P	P	M	M	M	M	noncoding	G36544		misc_RNA	463	chrX	-	150158777	150159240	CCAAGTGGCCTCAACTTGACAGCCTCTTTAAAACTCAATGTTTGCCTAATCAAAGATCAT	natural antisense	NM_005342	HMGB3	high mobility group protein B3	+	150151762	150159248
ASHG19A3A036659	88.4208	71.1249	69.6425	68.8357	60.6977	67.1311	74.1682	6.58447	6.28472	6.28416	5.97426	5.86277	5.9863	6.02618	P	P	P	P	M	M	M	noncoding	G43227		misc_RNA	103	chr8	+	66514940	66515043	AAACACATCTGGTTCTGGCAGCAAGTTATATTATGCATTTAGAGCAATAGGTGCCCTGAA	natural antisense	NM_018120	ARMC1	armadillo repeat-containing protein 1	-	66514690	66546452
ASHG19A3A054475	167.434	176.598	167.555	243.116	260.832	212.49	301.103	7.45888	7.52412	7.48885	7.87628	8.06058	7.70781	8.15082	P	P	P	P	M	M	M	noncoding	uc002dxm.2	LOC23117	UCSC_knowngene	1138	chr16	+	30234297	30235813	TTTGGGTGATGATGGTTCCACGTCAGCGGCCCTCCGCCTCTTGGGTTTGCGTGACGGTTC	intergenic
ASHG19A3L0001445	41.3163	32.1408	38.5593	39.0292	41.0523	42.9152	42.0157	5.51134	5.22198	5.47377	5.12024	5.27199	5.31477	5.17373	P	P	P	P	M	M	M	noncoding	BY798287	lincRNA-RAB28-2	lincRNA	570	chr4	+	11517303	11517873	TTTTTCACTTGTCCAAACATGAAGCACACTTGCTTCTCCAGGTGTGGCATTGCAGAAAGC	intergenic
ASHG19A3A032209	168.207	162.901	144.759	102.726	117.511	78.6772	113.926	7.46487	7.4142	7.2933	6.57215	6.84542	6.21432	6.66933	P	P	P	P	M	M	M	noncoding	ENST00000392260	RP11-472G23.7	Ensembl	808	chr6	+	150363681	150364489	ATGATTCTGTGGATTACCAGACATTGTGGTAGGGAAAGGACTCACTTTCTCATCCCATGG	intergenic
ASHG19A3A007646	128.192	130.088	115.003	52.0609	55.4143	52.8043	67.6535	7.09286	7.11132	6.97731	5.55774	5.72259	5.62658	5.88752	P	P	P	P	M	M	M	noncoding	NR_028388	FUS	RefSeq_NR	5084	chr16	+	31191430	31206190	TCTTCTTATGGCCAGAGCCAGAACACAGGCTATGGAACTCAGTCAACTCCCCAGGGATAT	exon sense-overlapping	NM_001170634	FUS	RNA-binding protein FUS isoform 2	+	31191430	31206192
ASHG19A3A007646	128.192	130.088	115.003	52.0609	55.4143	52.8043	67.6535	7.09286	7.11132	6.97731	5.55774	5.72259	5.62658	5.88752	P	P	P	P	M	M	M	noncoding	NR_028388	FUS	RefSeq_NR	5084	chr16	+	31191430	31206190	TCTTCTTATGGCCAGAGCCAGAACACAGGCTATGGAACTCAGTCAACTCCCCAGGGATAT	exon sense-overlapping	NM_004960	FUS	RNA-binding protein FUS isoform 1	+	31191430	31206192
ASHG19A3A007646	128.192	130.088	115.003	52.0609	55.4143	52.8043	67.6535	7.09286	7.11132	6.97731	5.55774	5.72259	5.62658	5.88752	P	P	P	P	M	M	M	noncoding	NR_028388	FUS	RefSeq_NR	5084	chr16	+	31191430	31206190	TCTTCTTATGGCCAGAGCCAGAACACAGGCTATGGAACTCAGTCAACTCCCCAGGGATAT	exon sense-overlapping	NM_001170937	FUS	RNA-binding protein FUS isoform 3	+	31191430	31206192
ASHG19A3A024338	59.1165	52.7811	53.0716	35.4537	64.8439	37.0362	56.8599	6.0171	5.88028	5.9101	4.97426	5.95895	5.09564	5.63041	P	P	P	P	M	M	M	noncoding	uc003hii.3	AK027257	UCSC_knowngene	2546	chr4	-	75881183	75895572	AATCTGCTCCCAGGCCAAGACAATACAACCAAATCATCTGGATGCAAGTCAAGCTATGAG	intronic antisense	NM_015393	PARM1	prostate androgen-regulated mucin-like protein 1	+	75858284	75975325
ASHG19A3L0000103	453.793	432.159	400.085	710.923	1110.92	689.745	1192.79	8.80794	8.73297	8.67935	9.51497	10.231	9.49632	10.2467	P	P	P	P	M	M	M	noncoding	BF511988	lincRNA-TOMM20-1	lincRNA	521	chr1	+	235062091	235062598	ATTTACTTGAAAGAGACCTCATGCCAAAAAATGCATAGCATCATCCCCCACCTGCTCAGT	intergenic
ASHG19A3A013701	27.4894	26.7396	30.3352	30.9283	40.3897	31.5959	54.4818	4.94532	4.97826	5.14274	4.76952	5.24449	4.8546	5.56481	A	P	P	M	M	M	M	noncoding	uc002sbr.2	BC071802	UCSC_knowngene	1674	chr2	-	62296591	62374016	ACCTGGAACCCTGATTCTTCTCAAACTTGGCCTCTAATATCCAACGGGACATAACATCTG	intronic antisense	NM_152516	COMMD1	COMM domain-containing protein 1	+	62132802	62363205
ASHG19A3A015205	187.393	195.807	180.273	370.38	486.522	452.477	572.431	7.61445	7.66378	7.59257	8.5175	8.99977	8.85388	9.1346	P	P	P	P	P	P	M	noncoding	ENST00000458377	AC005237.4	Ensembl	559	chr2	-	241955015	242003533	TCTGCTGTCTCCCAGCGCCTGCCACTCAGCAGAGGCCGTCTGCAACCCACAACTATTGCT	natural antisense	NM_001080437	SNED1	sushi, nidogen and EGF-like domain-containing	+	241938254	242033643
ASHG19A3A007593	16.9397	8.16676	11.1725	14.3821	32.1131	19.7902	34.9958	4.2443	3.55366	3.77209	3.58226	4.90168	4.14439	4.89599	A	A	A	P	M	P	M	noncoding	NR_027910	CALB2	RefSeq_NR	1431	chr16	+	71392625	71424339	AATTGGGCCTCTCAGAGATGTCCCGGGCATGAAGCTGACCTCAGAGGAGTTTAACGCGAT	exon sense-overlapping	NM_001740	CALB2	calretinin isoform 1	+	71392615	71424342
ASHG19A3A007593	16.9397	8.16676	11.1725	14.3821	32.1131	19.7902	34.9958	4.2443	3.55366	3.77209	3.58226	4.90168	4.14439	4.89599	A	A	A	P	M	P	M	noncoding	NR_027910	CALB2	RefSeq_NR	1431	chr16	+	71392625	71424339	AATTGGGCCTCTCAGAGATGTCCCGGGCATGAAGCTGACCTCAGAGGAGTTTAACGCGAT	exon sense-overlapping	NM_007088	CALB2	calretinin isoform 22k	+	71392615	71424342
ASHG19A3A020171	779.657	809.685	701.894	258.792	244.276	215.353	268.839	9.52085	9.57624	9.43175	7.97243	7.95738	7.72577	7.9773	P	P	P	M	M	M	M	noncoding	uc010gto.2	LOC96610	UCSC_knowngene	3179	chr22	+	22652462	22664057	AAGCCACTGGGTTGCAAGTTCAGATGGTCTTTCTTGTTTTTCTTAGCTAATTGTAAGTAA	intergenic
ASHG19A3A015641	132.926	139.229	130.648	145.325	167.895	179.241	164.482	7.14121	7.20331	7.15484	7.08889	7.38544	7.45051	7.22566	P	P	P	M	M	M	M	noncoding	AK122979		misc_RNA	2107	chr2	+	48766384	48768491	CCCAATCCGTCATACTGACTGAGGTTCTTAACTCCTAATTAACTTAATTAAATTAACTCC	intron sense-overlapping	NM_001198593	STON1-GTF2A1L	STON1-GTF2A1L protein isoform 2	+	48757063	49003656
ASHG19A3A015641	132.926	139.229	130.648	145.325	167.895	179.241	164.482	7.14121	7.20331	7.15484	7.08889	7.38544	7.45051	7.22566	P	P	P	M	M	M	M	noncoding	AK122979		misc_RNA	2107	chr2	+	48766384	48768491	CCCAATCCGTCATACTGACTGAGGTTCTTAACTCCTAATTAACTTAATTAAATTAACTCC	intron sense-overlapping	NM_006873	STON1	stonin-1	+	48757307	48825654
ASHG19A3A015641	132.926	139.229	130.648	145.325	167.895	179.241	164.482	7.14121	7.20331	7.15484	7.08889	7.38544	7.45051	7.22566	P	P	P	M	M	M	M	noncoding	AK122979		misc_RNA	2107	chr2	+	48766384	48768491	CCCAATCCGTCATACTGACTGAGGTTCTTAACTCCTAATTAACTTAATTAAATTAACTCC	intron sense-overlapping	NM_001198595	STON1	stonin-1	+	48757307	48825654
CUST_913_PI426073487	35.5035	26.7841	26.9058	21.8329	22.5484	26.2813	30.6364	5.30775	4.98039	4.97728	4.23458	4.37106	4.57754	4.68956	A	P	P	P	M	M	M	noncoding	uc.434-	uc.434	UCR	249	chr18	-	44770787	44771036	TTATACAAATTAAATGAAACCACCTTTTACTGATTGCTAAATGTCTCCAAGGGGTTTGGG	intergenic
ASHG19A3A034947	24.472	25.6697	24.8882	39.3782	29.4223	32.1071	37.6952	4.78182	4.91862	4.86309	5.13272	4.7712	4.87911	5.00779	A	P	P	M	M	M	M	noncoding	NR_002332	ST7OT3	RefSeq_NR	1052	chr7	+	116822734	116849991	TTTCAGTCCCGCTATTAAGTACATTTTGGCCTCTAAGAAACTTCGTGTGGTTCACCTCAG	exon sense-overlapping	NM_021908	ST7	suppressor of tumorigenicity 7 protein isoform	+	116593380	116863961
ASHG19A3A034947	24.472	25.6697	24.8882	39.3782	29.4223	32.1071	37.6952	4.78182	4.91862	4.86309	5.13272	4.7712	4.87911	5.00779	A	P	P	M	M	M	M	noncoding	NR_002332	ST7OT3	RefSeq_NR	1052	chr7	+	116822734	116849991	TTTCAGTCCCGCTATTAAGTACATTTTGGCCTCTAAGAAACTTCGTGTGGTTCACCTCAG	exon sense-overlapping	NM_018412	ST7	suppressor of tumorigenicity 7 protein isoform	+	116593380	116870075
ASHG19A3A007590	223.467	233.133	202.833	8.71732	5.89618	10.4784	17.1219	7.84736	7.89995	7.74881	2.83294	2.53081	3.1421	3.7823	P	P	P	M	A	A	A	noncoding	NR_027878	ADAM9	RefSeq_NR	4005	chr8	+	38854504	38962777	ATGTTCAGAAAAAGTGTCATGGACATGGGAAATGAATACTGCATTGAGGGACGGACTTCT	exon sense-overlapping	NM_003816	ADAM9	disintegrin and metalloproteinase	+	38854504	38962779
ASHG19A3A007590	223.467	233.133	202.833	8.71732	5.89618	10.4784	17.1219	7.84736	7.89995	7.74881	2.83294	2.53081	3.1421	3.7823	P	P	P	M	A	A	A	noncoding	NR_027878	ADAM9	RefSeq_NR	4005	chr8	+	38854504	38962777	ATGTTCAGAAAAAGTGTCATGGACATGGGAAATGAATACTGCATTGAGGGACGGACTTCT	bidirectional	NM_031940	TM2D2	TM2 domain-containing protein 2 isoform b	-	38846326	38854041
ASHG19A3A007590	223.467	233.133	202.833	8.71732	5.89618	10.4784	17.1219	7.84736	7.89995	7.74881	2.83294	2.53081	3.1421	3.7823	P	P	P	M	A	A	A	noncoding	NR_027878	ADAM9	RefSeq_NR	4005	chr8	+	38854504	38962777	ATGTTCAGAAAAAGTGTCATGGACATGGGAAATGAATACTGCATTGAGGGACGGACTTCT	bidirectional	NM_001024380	TM2D2	TM2 domain-containing protein 2 isoform b	-	38846326	38854041
ASHG19A3A007590	223.467	233.133	202.833	8.71732	5.89618	10.4784	17.1219	7.84736	7.89995	7.74881	2.83294	2.53081	3.1421	3.7823	P	P	P	M	A	A	A	noncoding	NR_027878	ADAM9	RefSeq_NR	4005	chr8	+	38854504	38962777	ATGTTCAGAAAAAGTGTCATGGACATGGGAAATGAATACTGCATTGAGGGACGGACTTCT	bidirectional	NM_001024381	TM2D2	TM2 domain-containing protein 2 isoform b	-	38846326	38854041
ASHG19A3A007590	223.467	233.133	202.833	8.71732	5.89618	10.4784	17.1219	7.84736	7.89995	7.74881	2.83294	2.53081	3.1421	3.7823	P	P	P	M	A	A	A	noncoding	NR_027878	ADAM9	RefSeq_NR	4005	chr8	+	38854504	38962777	ATGTTCAGAAAAAGTGTCATGGACATGGGAAATGAATACTGCATTGAGGGACGGACTTCT	bidirectional	NM_078473	TM2D2	TM2 domain-containing protein 2 isoform a	-	38846326	38854041
ASHG19A3H0000205	14014.1	16568.1	12791.9	2726.68	4782.53	4805.11	4571.33	13.5487	13.8065	13.4944	11.5153	12.3686	12.3487	12.2059	P	P	P	M	M	M	M	noncoding	nc-HOXC10-129-	nc-HOXC10-129	HOX cluster	260	chr12	+	54378513	54378773	CTCCACCCCTCTACCTCCCCTGCCGCCCGGGGGGCGCTTCCTTTGTTCGCGGGGAAGGGC	intergenic
ASHG19A3A010928	73.0706	71.0274	63.9301	88.4813	96.0666	100.155	111.134	6.32456	6.28321	6.16591	6.35673	6.54389	6.57344	6.63309	P	P	P	P	M	M	M	noncoding	ENST00000356684	RP11-348H3.6	Ensembl	2527	chr1	-	213025449	213031430	CATGCTGGGCCTTATTATTAACAAGAACTTTCTGAATCTCTTAAGATGTAGTGAAAGCAG	bidirectional	NM_014053	FLVCR1	feline leukemia virus subgroup C	+	213031596	213072705
ASHG19A3A043970	137.353	172.228	138.594	164.486	167.166	186.159	181.975	7.18738	7.49003	7.23493	7.28023	7.37871	7.50731	7.38089	P	P	P	M	M	M	M	noncoding	X98261		NRED	686	chr10	+	58118391	58120977	AAACTCAACCAGGATCTTGGCTGGCAGTTCTGCCTCCTCCTGCAGGCCTACAGGTTCCAA	natural antisense	NM_001005413	ZWINT	ZW10 interactor isoform b	-	58117198	58121034
ASHG19A3A043970	137.353	172.228	138.594	164.486	167.166	186.159	181.975	7.18738	7.49003	7.23493	7.28023	7.37871	7.50731	7.38089	P	P	P	M	M	M	M	noncoding	X98261		NRED	686	chr10	+	58118391	58120977	AAACTCAACCAGGATCTTGGCTGGCAGTTCTGCCTCCTCCTGCAGGCCTACAGGTTCCAA	natural antisense	NM_032997	ZWINT	ZW10 interactor isoform a	-	58117198	58121034
ASHG19A3A043970	137.353	172.228	138.594	164.486	167.166	186.159	181.975	7.18738	7.49003	7.23493	7.28023	7.37871	7.50731	7.38089	P	P	P	M	M	M	M	noncoding	X98261		NRED	686	chr10	+	58118391	58120977	AAACTCAACCAGGATCTTGGCTGGCAGTTCTGCCTCCTCCTGCAGGCCTACAGGTTCCAA	natural antisense	NM_007057	ZWINT	ZW10 interactor isoform a	-	58117198	58121034
ASHG19A3A037406	658.77	772.644	608.53	464.028	476.927	463.409	502.238	9.29856	9.51175	9.23356	8.86929	8.96736	8.88788	8.93001	P	P	P	M	M	M	M	noncoding	ENST00000415209	AL591471.1	Ensembl	141	chr9	-	42553922	42554063	TGGGCAGAGGCACTCCTCACTTCCCAGGGGCTGCGTATGAATCACAATGTAGGGGATAAA	intergenic
ASHG19A3A019508	1079.69	1332.88	1118.28	1099.82	1206.06	1341.24	1290.73	9.95918	10.2523	10.0652	10.1834	10.3552	10.4961	10.3728	P	P	P	M	M	M	M	noncoding	ENST00000437860	AC007050.14	Ensembl	327	chr22	-	21051047	21053224	AGGCAGTCAATAAGATGTCCCTGCACAACCTTGCCACTGTCTTTGGCCCCATGCTGCTCC	intergenic
ASHG19A3A039606	12.0421	16.1434	5	17.7255	40.2053	32.2474	23.892	3.76852	4.3376	2.39437	3.91567	5.2369	4.88571	4.3091	A	A	A	M	M	M	M	noncoding	AK123791		misc_RNA	2447	chrX	-	13669113	13671558	TATTCTCATTCTTTGCCTGCAAAGGGCCAGTAAAAGCACAGTGATGGTTGAACGAATGTG	natural antisense	NM_152634	TCEANC	transcription elongation factor A N-terminal and	+	13671306	13682247
ASHG19A3H0000094	33571.7	30229.5	27715.1	30056.7	29037.7	26340.5	28785.2	14.7896	14.6749	14.5924	15.0715	15.008	14.8455	14.9048	P	P	P	P	P	M	P	noncoding	nc-HOXB9-193-	nc-HOXB9-193	HOX cluster	858	chr17	-	46768301	46769159	CAGAAAATGTTGACATTACTCTGAAGGGATGCACAGTTATTGTGAAGGGCCCCAGAGGAA	intergenic
ASHG19A3A015288	14.8557	103.734	12.6301	15.1251	12.1656	39.2736	21.4597	4.06679	6.8023	3.93317	3.6648	3.40037	5.18332	4.1402	P	A	A	P	A	M	P	noncoding	ENST00000492300	RP11-734K21.3	Ensembl	368	chr2	+	9255325	9257013	CCTGGCTCTGAGAAGAAGCTACAAAACACAGTAGAAGAAAAAGAAAACAGTCTTTTAAAG	intergenic
ASHG19A3A038764	60.3606	65.3208	58.9037	58.8391	37.3857	62.0371	60.5068	6.04285	6.16743	6.05581	5.73753	5.13069	5.86252	5.71928	P	P	P	P	M	M	P	noncoding	CR618740		misc_RNA	1126	chr9	+	73222062	73223187	CGAGGCCTGGGCTTTGTCAATATGTGAAGATGAATTTTGGAGAATCATGTAAACACAATT	intronic antisense	NM_206946	TRPM3	transient receptor potential cation channel	-	73149965	73483974
ASHG19A3A038764	60.3606	65.3208	58.9037	58.8391	37.3857	62.0371	60.5068	6.04285	6.16743	6.05581	5.73753	5.13069	5.86252	5.71928	P	P	P	P	M	M	P	noncoding	CR618740		misc_RNA	1126	chr9	+	73222062	73223187	CGAGGCCTGGGCTTTGTCAATATGTGAAGATGAATTTTGGAGAATCATGTAAACACAATT	intronic antisense	NM_001007471	TRPM3	transient receptor potential cation channel	-	73149965	73736514
ASHG19A3A038764	60.3606	65.3208	58.9037	58.8391	37.3857	62.0371	60.5068	6.04285	6.16743	6.05581	5.73753	5.13069	5.86252	5.71928	P	P	P	P	M	M	P	noncoding	CR618740		misc_RNA	1126	chr9	+	73222062	73223187	CGAGGCCTGGGCTTTGTCAATATGTGAAGATGAATTTTGGAGAATCATGTAAACACAATT	intronic antisense	NM_206947	TRPM3	transient receptor potential cation channel	-	73149965	73483974
ASHG19A3A038764	60.3606	65.3208	58.9037	58.8391	37.3857	62.0371	60.5068	6.04285	6.16743	6.05581	5.73753	5.13069	5.86252	5.71928	P	P	P	P	M	M	P	noncoding	CR618740		misc_RNA	1126	chr9	+	73222062	73223187	CGAGGCCTGGGCTTTGTCAATATGTGAAGATGAATTTTGGAGAATCATGTAAACACAATT	intronic antisense	NM_020952	TRPM3	transient receptor potential cation channel	-	73149965	73483974
ASHG19A3A038764	60.3606	65.3208	58.9037	58.8391	37.3857	62.0371	60.5068	6.04285	6.16743	6.05581	5.73753	5.13069	5.86252	5.71928	P	P	P	P	M	M	P	noncoding	CR618740		misc_RNA	1126	chr9	+	73222062	73223187	CGAGGCCTGGGCTTTGTCAATATGTGAAGATGAATTTTGGAGAATCATGTAAACACAATT	intronic antisense	NM_206945	TRPM3	transient receptor potential cation channel	-	73149965	73483974
ASHG19A3A038764	60.3606	65.3208	58.9037	58.8391	37.3857	62.0371	60.5068	6.04285	6.16743	6.05581	5.73753	5.13069	5.86252	5.71928	P	P	P	P	M	M	P	noncoding	CR618740		misc_RNA	1126	chr9	+	73222062	73223187	CGAGGCCTGGGCTTTGTCAATATGTGAAGATGAATTTTGGAGAATCATGTAAACACAATT	intronic antisense	NM_024971	TRPM3	transient receptor potential cation channel	-	73149965	73483974
ASHG19A3A038764	60.3606	65.3208	58.9037	58.8391	37.3857	62.0371	60.5068	6.04285	6.16743	6.05581	5.73753	5.13069	5.86252	5.71928	P	P	P	P	M	M	P	noncoding	CR618740		misc_RNA	1126	chr9	+	73222062	73223187	CGAGGCCTGGGCTTTGTCAATATGTGAAGATGAATTTTGGAGAATCATGTAAACACAATT	intronic antisense	NM_206944	TRPM3	transient receptor potential cation channel	-	73149965	73483974
ASHG19A3A023817	1169.68	1078.66	923.742	777.982	790.764	786.243	742.317	10.067	9.95671	9.80144	9.65977	9.73035	9.68818	9.52475	P	P	P	P	M	M	M	noncoding	NR_002451	ABCA11P	RefSeq_NR	1895	chr4	-	419223	467998	CCTGCGGGTATTGGATGATTCGTAGCTAAGACTTCGCGACACCCTTGAAGCTGAGAAATG	exon sense-overlapping	NM_133474	ZNF721	zinc finger protein 721	-	433778	493442
ASHG19A3A034077	109.332	101.606	101.115	158.852	80.4832	88.4846	79.3082	6.87567	6.77515	6.80091	7.22342	6.27901	6.38629	6.12987	P	P	P	P	M	M	P	noncoding	NR_015364	LOC441204	RefSeq_NR	1649	chr7	+	26443106	26535982	ACTCTGAATCCAGTGCTCTTTCTACTTCACCATAGACACATGCCCCTTGAGTATAAGGGA	intergenic
ASHG19A3A008387	208.076	208.879	186.133	59.205	49.6317	45.7867	50.7638	7.75195	7.75405	7.6359	5.74618	5.55432	5.41387	5.45625	P	P	P	P	M	P	M	noncoding	AK023939		misc_RNA	3065	chr17	-	41434887	41437957	GGTACGTCACTATCCAGTCTACTTTTTCCATTGACGTGGCTGAGTCATATGTAGTATGAC	intergenic
ASHG19A3A054851	1856.88	1771.22	1532.97	743.179	732.352	766.466	746.025	10.7118	10.6491	10.4986	9.58793	9.61497	9.65116	9.53188	P	P	P	P	M	M	M	noncoding	uc002fih.2	AK057887	UCSC_knowngene	3732	chr16	+	84696933	84700665	TTTAACATGAACAGAATGTGTGGTTCTGAAGGTGTGTGGGGGTCTCAAGAAATTGTCCTT	intergenic
ASHG19A3A031700	3659.37	3407.17	3072.73	376.77	343.213	348.554	380.963	11.6694	11.5795	11.4939	8.54311	8.4636	8.45005	8.50236	P	P	P	P	P	P	M	noncoding	ENST00000402650	RP11-789A7.1	Ensembl	695	chr6	+	71874778	71875473	TGTCAACAGGAAATGATGAATGTCAAGCAATTCATTGATAAACTCCTACCTCCAATTGAT	intergenic
ASHG19A3L0003323	17.1471	9.69053	21.0674	39.7739	16.7902	18.781	19.0153	4.26014	3.73743	4.63784	5.14687	3.91907	4.06484	3.94372	A	A	P	P	P	M	P	noncoding	CK430718	lincRNA-C6orf118-2	lincRNA	465	chr6	+	164403207	164403679	AAACTACTAATGATTCAGAGAATTAGGCCTGTAGATCTCCATTTTCTCAACTTGTTTCAC	intergenic
ASHG19A3A053405	25.5476	28.8354	41.3672	66.449	27.1804	18.5325	34.1398	4.84642	5.07557	5.56918	5.91798	4.64931	4.04267	4.85593	A	P	P	P	P	M	M	noncoding	NR_027274	LOC100128788	RefSeq_NR	1371	chr16	-	2787076	2794798	AAACTGGGTTCACACAACAAGCTCGGACTCCTCTTAACACTCCTGATTGGTGACATTATG	intergenic
ASHG19A3A028258	6.40998	5.67103	5	257.844	265.294	267.612	244.081	2.9634	2.82882	2.39437	7.96792	8.08463	8.06035	7.83176	A	A	A	P	P	M	M	noncoding	uc003jrq.2	AB074188	UCSC_knowngene	2091	chr5	+	58153128	58155219	GGAGCTCTTGTGTGGGTTTAAAGCTATGAAGTGTATTCACATTGTGAAGTTTTAATTATC	intergenic
ASHG19A3H0000181	37.3519	17.6637	27.1014	15.355	11.3051	15.3423	12.2897	5.37423	4.45192	4.98691	3.68863	3.28004	3.73726	3.23225	A	P	P	A	A	M	M	noncoding	nc-HOXD3-39-	nc-HOXD3-39	HOX cluster	2228	chr2	+	177018599	177020827	TGGGGAAAGAAAACAAAACCTCTATGCACTGGGTCATTAGATAATGACTGAATTTTCTGT	intergenic
ASHG19A3A011559	66533.6	63313	56893.4	27980.6	29192.5	29613.6	29452.8	15.7515	15.7137	15.607	14.9723	15.0137	15.0212	14.9312	P	P	P	P	P	M	M	noncoding	ENST00000436287	ACTBP11	Ensembl	1126	chr1	-	224051427	224052553	ATGAAACTACCTTCAACTCCATCACGAAGTGTGACGTGGACATCTGCAAAGACCTGTACT	intergenic
ASHG19A3A049087	18.0254	9.50997	14.8219	36.0133	17.2109	14.2968	20.5892	4.33818	3.71814	4.15403	4.99889	3.95888	3.62672	4.06985	A	A	A	P	P	M	M	noncoding	ENST00000468934	RP11-240G22.1	Ensembl	316	chr12	+	117346116	117346432	TGGAATTGTTCAAGGTCTCCAAGAAAAAGTGGACCCTCAAGTTCATCAAGAAGAGAGCGG	intergenic
ASHG19A3A046706	222.673	209.19	198.368	371.599	152.632	164.027	168.94	7.8424	7.7553	7.72039	8.5249	7.24019	7.31649	7.26386	P	P	P	P	M	M	M	noncoding	ENST00000511464	AP000867.14	Ensembl	255	chr11	+	71279725	71279980	AGTGCAGTTGCTGCAAACTCTGCTGCTGCTCCTCAGGCTGTGAATCAACCTGCTCCCAGT	intergenic
ASHG19A3A051162	132.003	122.935	120.473	280.863	228.413	214.694	202.363	7.13084	7.03367	7.04191	8.0944	7.84767	7.72093	7.54358	P	P	P	P	M	M	M	noncoding	uc001ymn.2	BX161461	UCSC_knowngene	1557	chr14	-	103653558	103655365	AATCCCACAGGAGCTGTCGCTGATCTTTGTCCTCTATTCGCTGAAATAAAGTTCACCATG	intergenic
ASHG19A3A036213	10.0116	7.26626	7.05069	20.4571	15.9532	19.3732	66.6163	3.52878	3.43266	3.16925	4.13624	3.83875	4.11099	5.86499	A	A	A	P	M	M	M	noncoding	uc003yya.2	BC039358	UCSC_knowngene	2026	chr8	-	144425371	144442149	GTGAAGACTAATCACCATGAAAAGCCACCCAAGAAAAAAGGCCAAGTCGGCATCTTAAAT	intergenic
ASHG19A3A054444	1300.62	1316.79	1225.27	1224.18	902.885	777.902	816.518	10.2193	10.2385	10.1883	10.3439	9.9319	9.67471	9.66926	P	P	P	P	P	P	P	noncoding	ENST00000355407	AC009093.1	Ensembl	465	chr16	+	29260172	29260639	TTTTCTCTTCTAAGAACACTTGTCATTGAATTCACAGCCCTCCCTACTTCAGAACAATCT	intergenic
ASHG19A3A035500	1686.06	1763.23	1604.83	1219.13	835.574	723.818	822.735	10.5663	10.6387	10.5652	10.338	9.80931	9.5724	9.68346	P	P	P	P	P	M	P	noncoding	uc003wsr.1	CR590086	UCSC_knowngene	1374	chr8	-	9412656	9414030	AGGTGTCCCCTTGAGCTCTTGTCCCTTCCCTATAATTTTTCTCACCCTATGTGCTTTAAT	natural antisense	NM_003747	TNKS	tankyrase-1	+	9413444	9639856
ASHG19A3A010177	147581	142623	134467	117297	126254	104254	125169	16.9004	16.9194	16.8874	17.0629	17.1032	16.8039	17.0436	P	P	P	P	M	M	M	noncoding	ENST00000494882	RP11-681N23.1	Ensembl	321	chr18	-	13919601	13919922	TGCAAGCATTTTGAACTGGGAGGAGATAAGAAGAGAAAGGGCCAAGTGATCCCGTTCTAA	intergenic
ASHG19A3A047512	865.401	870.842	782.635	3990.33	4105.82	4157.96	4295.74	9.65846	9.68031	9.5821	12.0738	12.1543	12.1408	12.1205	P	P	P	P	M	M	P	noncoding	uc001rpo.1	AX747844	UCSC_knowngene	2073	chr12	-	47599681	47601754	ACCAAGCCTGGTGCCAATCATTGACAATATTATGGTTAGTACTTACTGAGGGCTGACTAT	intergenic
ASHG19A3A008754	98.1534	108.654	107.411	151.803	98.7114	49.7599	108.494	6.73352	6.86388	6.88714	7.15351	6.57947	5.53458	6.5967	P	P	P	P	M	M	M	noncoding	uc002jis.3	BC039327	UCSC_knowngene	2060	chr17	-	69093914	69198318	CTTTAAATACTCATGTCACATTTGTGCTGTTGCCAATGCTTCTCAGACCCTCCAGATGAG	intergenic
ASHG19A3L0003197	58.9653	58.6746	39.0108	41.5709	42.1755	33.2021	42.5505	6.01308	6.02106	5.49012	5.21171	5.31094	4.9262	5.19453	P	P	P	P	M	M	M	noncoding	BU533451	lincRNA-ATP6V1C1-2	lincRNA	834	chr8	-	104091398	104092160	ACAAAAAACCAAGAAAGAAAGTGGGGGGTGGGATACTCTTACATCAAGAACCGCTTCTCC	intergenic
ASHG19A3L0001272	23.0806	17.2523	21.3084	70.6605	14.1506	25.0741	35.9376	4.69839	4.42424	4.65155	6.0138	3.64561	4.50834	4.93952	A	P	P	P	A	M	P	noncoding	BG180467	lincRNA-POTED-1	lincRNA	893	chr21	+	11139159	11139834	AACTTCAGACGCGAGAGTGTTGATTATACACTCAAGGCCCCACATTAGGGAAGTTTGTGA	intergenic
ASHG19A3L0003244	24.1015	20.969	21.6477	57.8509	13.6447	28.8777	68.6155	4.76166	4.66523	4.67211	5.70865	3.58028	4.72098	5.91208	A	P	P	P	A	M	P	noncoding	chr12:38862405-38887736-	lincRNA-ALG10B-4	lincRNA	25332	chr12	-	38862405	38887736	GGGTTTGGTCATTATTAGGATGAACCATATACTATTGCCTCATTCAGGTCAAAACTATAA	intergenic
ASHG19A3A022639	28.0268	21.7136	25.9783	48.9202	22.342	32.6884	41.5427	4.97168	4.70707	4.92735	5.45957	4.3553	4.90644	5.15822	A	P	P	M	M	M	M	noncoding	uc003cys.1	BC033528	UCSC_knowngene	2624	chr3	+	50297734	50300789	ATAATTGCTCCGGCTACTGATGTGGTGGGAACTTTGGTATTTTTAACCCATTTGGGGGGT	intergenic
ASHG19A3A040172	25660.7	24727.3	23011.2	8603.3	8826.31	8464.33	8965.88	14.3997	14.3756	14.3232	13.2211	13.2975	13.1836	13.2041	P	P	P	P	M	P	M	noncoding	ENST00000404582	RP11-568G11.3	Ensembl	967	chr1	+	220426911	220427878	AGAATTCTGCAACTTTGTTTAGTGCCAGCGATTATGAAGTGGCTCCTCCTGAGTACCATC	intronic antisense	NM_012414	RAB3GAP2	rab3 GTPase-activating protein non-catalytic	-	220321609	220445843
ASHG19A3L0000181	67.1553	46.18	65.4608	99.9671	86.0824	63.6116	104.503	6.20131	5.7039	6.19724	6.53229	6.37731	5.90433	6.53835	P	P	P	P	M	M	M	noncoding	AK309032	lincRNA-LMO4-3	lincRNA	1152	chr1	+	87678351	87717014	GTTTCTCTTTTCTCTCTGAGAATGTTAGACCTCTGATCTAATTCTCCACTGCTTCCTGCT	intergenic
ASHG19A3A008459	240.338	206.208	254.134	126.309	164.257	108.462	131.583	7.94355	7.73592	8.04859	6.88169	7.3513	6.69133	6.88649	P	P	P	P	M	M	M	noncoding	BC018035		NRED	458	chr17	-	43921245	43972139	GGCGAGGACGGGAGAGGACAGCGGAGGAGGAGAAGGTGGCTGTGGTGGCGGCGGCAGAAG	natural antisense	NM_001203251	MAPT	microtubule-associated protein tau isoform 7	+	43971747	44105699
ASHG19A3A008459	240.338	206.208	254.134	126.309	164.257	108.462	131.583	7.94355	7.73592	8.04859	6.88169	7.3513	6.69133	6.88649	P	P	P	P	M	M	M	noncoding	BC018035		NRED	458	chr17	-	43921245	43972139	GGCGAGGACGGGAGAGGACAGCGGAGGAGGAGAAGGTGGCTGTGGTGGCGGCGGCAGAAG	natural antisense	NM_005910	MAPT	microtubule-associated protein tau isoform 2	+	43971747	44105699
ASHG19A3A008459	240.338	206.208	254.134	126.309	164.257	108.462	131.583	7.94355	7.73592	8.04859	6.88169	7.3513	6.69133	6.88649	P	P	P	P	M	M	M	noncoding	BC018035		NRED	458	chr17	-	43921245	43972139	GGCGAGGACGGGAGAGGACAGCGGAGGAGGAGAAGGTGGCTGTGGTGGCGGCGGCAGAAG	natural antisense	NM_016841	MAPT	microtubule-associated protein tau isoform 4	+	43971747	44105699
ASHG19A3A008459	240.338	206.208	254.134	126.309	164.257	108.462	131.583	7.94355	7.73592	8.04859	6.88169	7.3513	6.69133	6.88649	P	P	P	P	M	M	M	noncoding	BC018035		NRED	458	chr17	-	43921245	43972139	GGCGAGGACGGGAGAGGACAGCGGAGGAGGAGAAGGTGGCTGTGGTGGCGGCGGCAGAAG	natural antisense	NM_016835	MAPT	microtubule-associated protein tau isoform 1	+	43971747	44105699
ASHG19A3A008459	240.338	206.208	254.134	126.309	164.257	108.462	131.583	7.94355	7.73592	8.04859	6.88169	7.3513	6.69133	6.88649	P	P	P	P	M	M	M	noncoding	BC018035		NRED	458	chr17	-	43921245	43972139	GGCGAGGACGGGAGAGGACAGCGGAGGAGGAGAAGGTGGCTGTGGTGGCGGCGGCAGAAG	natural antisense	NM_001203252	MAPT	microtubule-associated protein tau isoform 8	+	43971747	44105699
ASHG19A3A008459	240.338	206.208	254.134	126.309	164.257	108.462	131.583	7.94355	7.73592	8.04859	6.88169	7.3513	6.69133	6.88649	P	P	P	P	M	M	M	noncoding	BC018035		NRED	458	chr17	-	43921245	43972139	GGCGAGGACGGGAGAGGACAGCGGAGGAGGAGAAGGTGGCTGTGGTGGCGGCGGCAGAAG	natural antisense	NM_001123066	MAPT	microtubule-associated protein tau isoform 6	+	43971747	44105699
ASHG19A3A008459	240.338	206.208	254.134	126.309	164.257	108.462	131.583	7.94355	7.73592	8.04859	6.88169	7.3513	6.69133	6.88649	P	P	P	P	M	M	M	noncoding	BC018035		NRED	458	chr17	-	43921245	43972139	GGCGAGGACGGGAGAGGACAGCGGAGGAGGAGAAGGTGGCTGTGGTGGCGGCGGCAGAAG	natural antisense	NM_016834	MAPT	microtubule-associated protein tau isoform 3	+	43971747	44105699
ASHG19A3A008459	240.338	206.208	254.134	126.309	164.257	108.462	131.583	7.94355	7.73592	8.04859	6.88169	7.3513	6.69133	6.88649	P	P	P	P	M	M	M	noncoding	BC018035		NRED	458	chr17	-	43921245	43972139	GGCGAGGACGGGAGAGGACAGCGGAGGAGGAGAAGGTGGCTGTGGTGGCGGCGGCAGAAG	natural antisense	NM_001123067	MAPT	microtubule-associated protein tau isoform 5	+	43971747	44105699
ASHG19A3A008459	240.338	206.208	254.134	126.309	164.257	108.462	131.583	7.94355	7.73592	8.04859	6.88169	7.3513	6.69133	6.88649	P	P	P	P	M	M	M	noncoding	BC018035		NRED	458	chr17	-	43921245	43972139	GGCGAGGACGGGAGAGGACAGCGGAGGAGGAGAAGGTGGCTGTGGTGGCGGCGGCAGAAG	intronic antisense	NM_175882	IMP5	signal peptide peptidase-like 2C precursor	+	43922255	43924438
ASHG19A3A043980	12676.6	11802.9	11055.6	4473.12	4538.15	4489.87	4767.5	13.4155	13.3246	13.2766	12.2464	12.2888	12.2567	12.27	P	P	P	P	M	M	M	noncoding	AK130049		NRED	2232	chr10	+	60588954	60591182	GATGCAATGAAGGGAATATGACACTACAGTATACAGAGTTGTTGTTATATGATGCACAAA	intergenic
ASHG19A3A007656	3786.32	3650.94	3398.83	392.186	412.903	397.362	390.751	11.7209	11.6787	11.6353	8.60393	8.73608	8.64951	8.53891	P	P	P	P	M	M	M	noncoding	NR_028412	APOC1P1	RefSeq_NR	939	chr19	+	45430059	45434643	GTGGTTCTGTCGATCGTCTTGGAAGCCAGGCGTTGTGGTGCGCGCTTGGCTACTTGGGAG	intergenic
ASHG19A3A054857	168.693	140.444	160.258	69.8368	115.202	81.1586	103.396	7.46952	7.21565	7.42706	5.99697	6.81417	6.25874	6.52168	P	P	P	P	M	M	M	noncoding	ENST00000393255	AC025280.1	Ensembl	399	chr16	+	84954082	84954483	ACTCCCGCCAACAGCAGCCGTTCCCCTAACTATAAGATGCTCAAGGAGGAGCAAGAGGTG	intergenic
ASHG19A3A035882	41.2125	27.262	38.802	50.7865	82.1204	63.2136	86.9912	5.50748	5.0024	5.48176	5.52176	6.31219	5.89599	6.26342	P	P	P	P	M	M	M	noncoding	ENST00000472530	AC021311.1	Ensembl	136	chr8	-	77048521	77048657	TAGTTATTCAGGCAATGCGTCTCTGCACACACCAACTTCATGGGACTCATTCTCAGCAAA	intergenic
ASHG19A3A022344	1327.28	1289.08	1215.64	1351.63	1523.18	1524.03	1527.19	10.2457	10.2064	10.1775	10.4958	10.7009	10.6745	10.613	P	P	P	P	M	M	M	noncoding	ENST00000412769	RP11-329A14.1	Ensembl	1257	chr1	+	48901638	48902895	CCTTGGACTGAGCCAGAATGTGATTTTCCTGATGAAAAAGACTCATACTTGGAATTCTAG	intronic antisense	NM_019073	SPATA6	spermatogenesis-associated protein 6 precursor	-	48761043	48937876
ASHG19A3A015510	28.6519	14.2234	29.463	21.6984	33.9664	19.7057	50.9509	5.00526	4.18461	5.10198	4.22463	4.98392	4.13913	5.46154	A	P	P	P	M	M	M	noncoding	ENST00000453451	AC012593.1	Ensembl	580	chr2	+	35024916	35388178	CTTTTCTGACCACGGTTTTCTGGAGTTTTTTCGTATGGAGTTTGTAAGCTTCCTGACATG	intergenic
ASHG19A3A050245	1922.44	1824.03	1659.26	733.906	782.562	808.82	972.446	10.7604	10.6933	10.614	9.567	9.70997	9.73035	9.94144	P	P	P	P	M	M	M	noncoding	ENST00000452680	RP11-485H8.2	Ensembl	848	chr1	-	116399584	116400440	AACTTTGGTGGTGGTCATGGAGGTAGTTTTTGGAATGACAACTTTGGTCATGGAGGAAAC	intergenic
ASHG19A3A026980	3516.95	3599.61	3026.56	1046.39	1056.09	998.354	1128.35	11.6134	11.6553	11.4755	10.1117	10.1597	10.0545	10.1654	P	P	P	P	M	P	P	noncoding	AK092482		RNAdb	2386	chr5	-	76723251	76725632	GCATGGCACAACATACTGCATGGGCTTACACCCAGAAAATTTGGATTTTAATAAAAATTT	natural antisense	NM_001029854	PDE8B	high affinity cAMP-specific and IBMX-insensitive	+	76506705	76724080
ASHG19A3A026980	3516.95	3599.61	3026.56	1046.39	1056.09	998.354	1128.35	11.6134	11.6553	11.4755	10.1117	10.1597	10.0545	10.1654	P	P	P	P	M	P	P	noncoding	AK092482		RNAdb	2386	chr5	-	76723251	76725632	GCATGGCACAACATACTGCATGGGCTTACACCCAGAAAATTTGGATTTTAATAAAAATTT	natural antisense	NM_001029851	PDE8B	high affinity cAMP-specific and IBMX-insensitive	+	76506705	76724080
ASHG19A3A026980	3516.95	3599.61	3026.56	1046.39	1056.09	998.354	1128.35	11.6134	11.6553	11.4755	10.1117	10.1597	10.0545	10.1654	P	P	P	P	M	P	P	noncoding	AK092482		RNAdb	2386	chr5	-	76723251	76725632	GCATGGCACAACATACTGCATGGGCTTACACCCAGAAAATTTGGATTTTAATAAAAATTT	natural antisense	NM_003719	PDE8B	high affinity cAMP-specific and IBMX-insensitive	+	76506705	76724080
ASHG19A3A026980	3516.95	3599.61	3026.56	1046.39	1056.09	998.354	1128.35	11.6134	11.6553	11.4755	10.1117	10.1597	10.0545	10.1654	P	P	P	P	M	P	P	noncoding	AK092482		RNAdb	2386	chr5	-	76723251	76725632	GCATGGCACAACATACTGCATGGGCTTACACCCAGAAAATTTGGATTTTAATAAAAATTT	natural antisense	NM_001029853	PDE8B	high affinity cAMP-specific and IBMX-insensitive	+	76506705	76724080
ASHG19A3A026980	3516.95	3599.61	3026.56	1046.39	1056.09	998.354	1128.35	11.6134	11.6553	11.4755	10.1117	10.1597	10.0545	10.1654	P	P	P	P	M	P	P	noncoding	AK092482		RNAdb	2386	chr5	-	76723251	76725632	GCATGGCACAACATACTGCATGGGCTTACACCCAGAAAATTTGGATTTTAATAAAAATTT	natural antisense	NM_001029852	PDE8B	high affinity cAMP-specific and IBMX-insensitive	+	76506705	76724080
ASHG19A3L0001078	387.857	372.343	372.681	801.005	828.405	841.162	914.604	8.59457	8.5376	8.58581	9.70534	9.79653	9.7865	9.85024	P	P	P	P	M	M	M	noncoding	DC428746	lincRNA-ARHGAP15	lincRNA	577	chr2	+	143828536	143986326	TTCTAGTCGAAGAATTGAATTTTACAAAGAATCCAAGCAACAGGCTCTGTCCAATATGAA	exon sense-overlapping	NM_018460	ARHGAP15	rho GTPase-activating protein 15	+	143886898	144525921
ASHG19A3A007207	180.135	141.737	152.068	175.733	279.74	142.812	338.965	7.55477	7.2274	7.36092	7.37899	8.16534	7.10369	8.32307	P	P	P	P	M	M	M	noncoding	NR_023385	RNF216L	RefSeq_NR	2155	chr7	+	5013615	5037798	AGGACACTATGCAATCACCCGAAAGGGGTTGGCATCTGCACATCCTTCCTGGGCATCTCG	intergenic
ASHG19A3A025851	75227.2	77299.1	70766.6	56281.1	59629.7	58931.2	60119.4	15.9264	16.0281	15.944	16.0056	16.0347	16.0023	15.9967	P	P	P	P	M	M	M	noncoding	ENST00000413177	RP11-289C17.1	Ensembl	1513	chr4	+	103817881	103819394	AAAGGTATAGCTGTACCACAAGACCACCAAGCTAAAGAGGCTGCCCAGAAAGCAGTTAAT	intronic antisense	NM_001100874	NHEDC1	sodium/hydrogen exchanger-like domain-containing	-	103806204	103940896
ASHG19A3L0001667	35.5796	23.3604	28.0532	21.6416	43.5334	16.7569	45.9041	5.31079	4.8017	5.03291	4.221	5.35738	3.88369	5.30469	A	P	P	P	M	M	P	noncoding	chr5:58234093-58248293-	lincRNA-RAB3C-2	lincRNA	14201	chr5	-	58234093	58248293	AATGGCTATCCTCCATCACAGCTGAAGAATGATCACACAGAGAACCGAGAAATGAGTCTC	intergenic
ASHG19A3L0001385	62.6279	55.4005	55.6962	41.0459	53.4832	40.8404	60.5145	6.09665	5.94359	5.9771	5.19424	5.66613	5.23892	5.71957	P	P	P	P	M	M	M	noncoding	AF130085		misc_RNA	2359	chr3	-	40993412	41278958	CCAAAAGAAACATGGTTAACAAACAGGGCATTCTCCTCTGTAAAGTTTGTGAAATCATTT	natural antisense	NM_001098210	CTNNB1	catenin beta-1	+	41240941	41281939
ASHG19A3L0001385	62.6279	55.4005	55.6962	41.0459	53.4832	40.8404	60.5145	6.09665	5.94359	5.9771	5.19424	5.66613	5.23892	5.71957	P	P	P	P	M	M	M	noncoding	AF130085		misc_RNA	2359	chr3	-	40993412	41278958	CCAAAAGAAACATGGTTAACAAACAGGGCATTCTCCTCTGTAAAGTTTGTGAAATCATTT	natural antisense	NM_001098209	CTNNB1	catenin beta-1	+	41240941	41281939
ASHG19A3L0001385	62.6279	55.4005	55.6962	41.0459	53.4832	40.8404	60.5145	6.09665	5.94359	5.9771	5.19424	5.66613	5.23892	5.71957	P	P	P	P	M	M	M	noncoding	AF130085		misc_RNA	2359	chr3	-	40993412	41278958	CCAAAAGAAACATGGTTAACAAACAGGGCATTCTCCTCTGTAAAGTTTGTGAAATCATTT	natural antisense	NM_001904	CTNNB1	catenin beta-1	+	41240941	41281939
ASHG19A3A041717	48.5978	39.5053	47.5209	29.9906	38.9039	30.8401	37.3327	5.74348	5.49346	5.75953	4.7239	5.1906	4.81984	4.99311	P	P	P	P	M	P	M	noncoding	ENST00000433225	AC151960.1	Ensembl	199	chrX	+	152415691	152416269	CCCATATCCACTCAACACATTCACTGACAAACTCGCTCACACAGGGTCATCTGATTGTAA	intergenic
ASHG19A3A015096	229.119	211.469	225.975	279.634	388.525	273.743	418.277	7.88035	7.76808	7.88638	8.08922	8.64233	8.09828	8.64393	P	P	P	P	M	P	M	noncoding	AF085934		misc_RNA	449	chr2	-	231330480	231330918	TGGGATCCTGCCCAGCTCTCTCCATAATCCTCTGTGTGTATTATTTGGAAATGCCTCTTT	intronic antisense	NM_001206701	SP100	nuclear autoantigen Sp-100 isoform 3	+	231280870	231372861
ASHG19A3A015096	229.119	211.469	225.975	279.634	388.525	273.743	418.277	7.88035	7.76808	7.88638	8.08922	8.64233	8.09828	8.64393	P	P	P	P	M	P	M	noncoding	AF085934		misc_RNA	449	chr2	-	231330480	231330918	TGGGATCCTGCCCAGCTCTCTCCATAATCCTCTGTGTGTATTATTTGGAAATGCCTCTTT	intronic antisense	NM_001206703	SP100	nuclear autoantigen Sp-100 isoform 5	+	231280870	231335250
ASHG19A3A015096	229.119	211.469	225.975	279.634	388.525	273.743	418.277	7.88035	7.76808	7.88638	8.08922	8.64233	8.09828	8.64393	P	P	P	P	M	P	M	noncoding	AF085934		misc_RNA	449	chr2	-	231330480	231330918	TGGGATCCTGCCCAGCTCTCTCCATAATCCTCTGTGTGTATTATTTGGAAATGCCTCTTT	intronic antisense	NM_001206704	SP100	nuclear autoantigen Sp-100 isoform 6	+	231281470	231335250
ASHG19A3A015096	229.119	211.469	225.975	279.634	388.525	273.743	418.277	7.88035	7.76808	7.88638	8.08922	8.64233	8.09828	8.64393	P	P	P	P	M	P	M	noncoding	AF085934		misc_RNA	449	chr2	-	231330480	231330918	TGGGATCCTGCCCAGCTCTCTCCATAATCCTCTGTGTGTATTATTTGGAAATGCCTCTTT	intronic antisense	NM_001080391	SP100	nuclear autoantigen Sp-100 isoform 1	+	231280870	231410317
ASHG19A3A015096	229.119	211.469	225.975	279.634	388.525	273.743	418.277	7.88035	7.76808	7.88638	8.08922	8.64233	8.09828	8.64393	P	P	P	P	M	P	M	noncoding	AF085934		misc_RNA	449	chr2	-	231330480	231330918	TGGGATCCTGCCCAGCTCTCTCCATAATCCTCTGTGTGTATTATTTGGAAATGCCTCTTT	intronic antisense	NM_001206702	SP100	nuclear autoantigen Sp-100 isoform 4	+	231280870	231335250
ASHG19A3A015096	229.119	211.469	225.975	279.634	388.525	273.743	418.277	7.88035	7.76808	7.88638	8.08922	8.64233	8.09828	8.64393	P	P	P	P	M	P	M	noncoding	AF085934		misc_RNA	449	chr2	-	231330480	231330918	TGGGATCCTGCCCAGCTCTCTCCATAATCCTCTGTGTGTATTATTTGGAAATGCCTCTTT	intronic antisense	NM_003113	SP100	nuclear autoantigen Sp-100 isoform 2	+	231280870	231381244
ASHG19A3A032809	2575.83	2761.03	2429.34	2013.91	2090.5	2109.54	2143.49	11.1823	11.277	11.1584	11.0758	11.1595	11.1465	11.1063	P	P	P	M	M	M	M	noncoding	ENST00000444843	CTD-2021A8.2	Ensembl	739	chr7	-	51454059	51454798	TTGACTTTTGGTGGCCTCTTCAGGCCCAGAACTTGACCTCCAGTCGGCCTTGGCAGGCCC	intergenic
ASHG19A3A048103	24935.3	25464.7	23368.1	39316.9	43547.8	42860.5	43298.6	14.3582	14.4125	14.3367	15.4729	15.5975	15.5634	15.5189	P	P	P	P	M	M	M	noncoding	ENST00000495697	RP11-18C24.2	Ensembl	534	chr12	-	121031817	121032351	AACACATCAATCTGGGTATCAAATATGACCCAAGTGTGGGTGTCTATGGCCTGGACTTCT	intergenic
ASHG19A3L0000859	20.2544	22.3335	25.2958	27.969	33.4162	33.4816	43.9132	4.50808	4.74178	4.88751	4.61816	4.95874	4.93832	5.24114	A	P	P	P	M	M	M	noncoding	BU632228	lincRNA-ERCC4	lincRNA	582	chr16	+	13453085	13453940	AGTTTATGGGTCACTTCTTTTTTCTAGCAGATGCGGTTGGTGCCAGTGTCACTTTCCTTG	intergenic
ASHG19A3A000494	783.105	752.683	823.991	293.473	813.79	609.284	891.972	9.52557	9.47942	9.6521	8.15906	9.771	9.30374	9.81	P	P	P	P	M	M	M	noncoding	ENST00000512530	AC007497.1	Ensembl	1920	chr16	+	53676109	53678911	ATCCGCCTACTCAGCCTCCGGAGTAGCTGAGGCAGGAGAATTGCTAGAACGTGGGAAGAG	intronic antisense	NM_001127897	RPGRIP1L	protein fantom isoform b	-	53633817	53737771
ASHG19A3A000494	783.105	752.683	823.991	293.473	813.79	609.284	891.972	9.52557	9.47942	9.6521	8.15906	9.771	9.30374	9.81	P	P	P	P	M	M	M	noncoding	ENST00000512530	AC007497.1	Ensembl	1920	chr16	+	53676109	53678911	ATCCGCCTACTCAGCCTCCGGAGTAGCTGAGGCAGGAGAATTGCTAGAACGTGGGAAGAG	intronic antisense	NM_015272	RPGRIP1L	protein fantom isoform a	-	53633817	53737771
ASHG19A3A020726	2564.59	2856.65	2553.84	3835.89	4030.41	4086.84	4030.01	11.1756	11.3204	11.2293	12.0122	12.1309	12.1141	12.0184	P	P	P	P	M	M	M	noncoding	ENST00000396959	KRT18P17	Ensembl	1279	chr3	-	12828891	12830170	AGATCAACAATGCCCATCTTGCTGCTGATGACTTTAGAGTCAAGTATGAGACAGAGCTGG	intergenic
ASHG19A3A007679	126.326	128.042	117.481	33.6331	57.0234	63.7821	63.0455	7.07253	7.09023	7.00551	4.89381	5.76678	5.90828	5.7842	P	P	P	P	M	M	M	noncoding	NR_028581	G6PC3	RefSeq_NR	1848	chr17	+	42148097	42153711	AGTGGCTCAACCTCATCTTCAAGTGAAGCATGCTTTGTGCTGGGCATCACGGTAGCTGCT	exon sense-overlapping	NM_138387	G6PC3	glucose-6-phosphatase 3	+	42148097	42153712
ASHG19A3A055214	14.7538	12.5913	16.3779	30.2457	19.1893	25.5616	23.1657	4.05682	4.0399	4.29261	4.73636	4.13424	4.53683	4.26052	A	A	A	P	M	M	M	noncoding	uc003mur.3	DKFZp686I15217	UCSC_knowngene	1570	chr6	+	2988881	2991404	CCGGATGAACAGAGAAAGCGACAGGACGCCCTTGCATACATTAAGATATGTATATATGGA	intergenic
ASHG19A3A021326	234.394	268.934	204.068	227.283	217.121	228.891	211.232	7.91341	8.0894	7.75625	7.76865	7.77193	7.81947	7.60732	P	P	P	P	M	M	M	noncoding	ENST00000439836	RP11-118N24.1	Ensembl	939	chr3	-	94655929	94656868	AATTACCTGTTTGCAGTTCAACCCCAAGTTCATGACTTTTGCCAGTGCGTGTTCCAGCAT	intergenic
ASHG19A3A022091	723.064	876.399	716.236	377.824	656.316	680.22	704.735	9.4204	9.68884	9.45764	8.54655	9.45515	9.47218	9.45262	P	P	P	P	M	M	M	noncoding	ENST00000434379	RP11-655G22.2	Ensembl	478	chr3	-	191670137	191670615	ATTATCCTGATTGGCTGTCCTTTCTCCTTCTGCTGCGGCCCGAAGGGCGAAGACAACCTC	intergenic
ASHG19A3A014360	16.7542	15.5983	18.4164	21.2902	24.8195	31.5925	31.956	4.23005	4.29621	4.45132	4.19573	4.51103	4.85405	4.75677	A	A	P	P	M	P	M	noncoding	ENST00000452936	AC009477.7	Ensembl	217	chr2	-	131938725	131938942	ACGAGAGCGGTGAGCCCCAGGCTGGGGAGCCAGTGCTGCCTGGCATCCTCCGGCCACCCT	intergenic
ASHG19A3A025560	63.8188	66.9018	63.7377	55.8499	52.4098	63.0223	61.4522	6.1226	6.19975	6.16192	5.65466	5.63509	5.89025	5.74287	P	P	P	M	M	M	M	noncoding	ENST00000508328	RP11-12A1.1	Ensembl	754	chr4	+	57976018	58071676	GTAGACAGATGATGAGACGCCAAAGTACAGCTGAGTGAAAGCGGTTCCTTTGAAAACTAA	natural antisense	NM_001553	IGFBP7	insulin-like growth factor-binding protein 7	-	57897243	57976539
ASHG19A3A000127	20.1572	24.3922	15.5206	52.7987	40.7177	44.68	46.0053	4.499	4.8564	4.2196	5.57768	5.25744	5.37894	5.30709	A	P	A	P	M	M	M	noncoding	ENST00000418128	RP11-12A20.4	Ensembl	194	chr9	-	67789409	67790112	TCAGGCCTGCCCGGATGGTGTTGGTCAAAACGAACACACTGCAGACGAGGAGAAGAATCC	intergenic
ASHG19A3A013898	28975.3	33769.2	28623.5	4175.08	4280.97	4424.12	4489.41	14.5767	14.8208	14.6408	12.1419	12.2038	12.2341	12.1831	P	P	P	P	M	M	M	noncoding	uc002snv.3	BC024248	UCSC_knowngene	1179	chr2	-	78639672	78769187	GGCAATCCTGATTTAAAACTAAGACTGGCTTGTGGTTAAATGAATGTGTTCAGTTTTTGA	intergenic
ASHG19A3H0000088	107.179	114.433	98.1358	156.795	218.091	218.829	225.284	6.85036	6.93287	6.76013	7.20458	7.7784	7.75195	7.70234	P	P	P	P	M	M	M	noncoding	nc-HOXB2-162-	nc-HOXB2-162	HOX cluster	178	chr17	-	46623286	46623464	CCCACCACACTCATGCACACACATAACGCTGATCTGAACTTTGAGAGTGCTCTAAGTTAA	intergenic
ASHG19A3A051733	27.7412	28.6395	26.539	24.9601	29.8408	36.08	25.5901	4.95794	5.06689	4.95823	4.44267	4.79246	5.05624	4.41408	A	P	P	P	P	M	M	noncoding	NR_015340	SERPINA13	RefSeq_NR	1718	chr14	+	95107061	95113330	CAGTAATTACCATTGAGCAAACACCTACTATGTACCAAATGCTTTCTATCTCTTATCTCA	intergenic
ASHG19A3A045566	78.1928	86.4085	79.4167	185.826	188.467	179.785	204.503	6.42295	6.54711	6.47215	7.46522	7.55636	7.4561	7.55974	P	P	P	P	M	M	M	noncoding	AK129753		misc_RNA	2007	chr11	-	86620031	86622038	TGTCCTCTTTTTACTGAAATAGGGGCCCTTGTTGATGGTAGTCACTGCCCATGCTGTTTA	intergenic
ASHG19A3L0003363	59.9555	81.5448	59.1448	37.5481	38.4304	48.6418	39.3547	6.03442	6.46908	6.06175	5.05984	5.17188	5.50298	5.07107	P	P	P	M	M	M	M	noncoding	BF030551	lincRNA-VPS4B	lincRNA	605	chr18	+	61038344	61038945	GAGCCAATTCTCTATGAATGAGACCCCATGATATCTAAATTCCATTGGTAAATTTACTTC	intergenic
ASHG19A3A014374	3442.81	4801.86	3263.98	1151.23	2512.01	2857.26	3028.28	11.5879	12.0778	11.5722	10.2546	11.4337	11.5919	11.6181	P	P	P	M	M	M	M	noncoding	ENST00000419962	AC073869.17	Ensembl	1030	chr2	-	132142033	132143063	TATAAAAAGAAAATGACAGTTCAAAAACACAAAACCCGTATCATTCCTCCCCCCACTCAT	intergenic
ASHG19A3A050947	343.193	352.21	276.368	333.518	191.988	288.439	220.667	8.429	8.45273	8.16665	8.36219	7.5833	8.17625	7.67185	P	P	P	P	P	P	P	noncoding	G36563		misc_RNA	410	chr14	-	73740918	73741328	TTGGTAATAAAAGTCACCTTTCAGAGCTTTGGTCCCTGTAATGCCCGTCTTTCCTGTGTC	natural antisense	NM_173462	PAPLN	papilin	+	73704204	73741347
ASHG19A3A040649	229.336	203.884	180.856	424.452	187.419	263.318	218.869	7.88267	7.72074	7.59798	8.72398	7.54925	8.03259	7.65974	P	P	P	P	P	P	P	noncoding	ENST00000414053	RP4-617A9.4	Ensembl	816	chrX	+	2822944	2824122	ATGATTCTTCTACCTATGACTCTCAGTGCTGTTGCCTCTTCCTCTGGATCTTGGAAGCTT	natural antisense	NM_001669	ARSD	arylsulfatase D precursor	-	2822010	2847392
ASHG19A3A031817	463.492	386.603	356.161	296.721	302.391	244.386	327.963	8.83383	8.584	8.52012	8.1776	8.27313	7.92319	8.27786	P	P	P	P	P	P	P	noncoding	ENST00000403367	RP1-72A23.1	Ensembl	482	chr6	+	89769346	89769828	TTCGTTGTGGTTGGAGTTAATGACACTGAGAACAAGATGGCTATTTATGAATTCATTCAT	intergenic
ASHG19A3A033711	370.907	382.232	275.462	177.835	151.678	153.463	143.971	8.53575	8.5686	8.16382	7.40017	7.22984	7.21687	7.03085	P	P	P	P	P	P	P	noncoding	ENST00000437833	RP11-122G18.5	Ensembl	1806	chr1	+	161337811	161341754	GCTTCAGTTGCCTTAACTAGTTGCCTTGGCATCATTAATAAGTTTTCTTTTCCTCTACTG	bidirectional	NM_001013625	C1orf192	hypothetical protein LOC257177	-	161334520	161337664
ASHG19A3A014767	103.61	94.1806	82.3394	91.0653	49.3437	70.341	61.4088	6.80801	6.67357	6.52259	6.40083	5.54413	6.05969	5.74209	P	P	P	P	P	P	P	noncoding	ENST00000500441	AC008122.1	Ensembl	4740	chr2	-	190728384	190734541	GTTCAATGGCTCTCTTCATTTGACTATTGTATCGTTCCAAGTCTTTAGTAGCCTTCTCTT	natural antisense	NM_001128144	PMS1	PMS1 protein homolog 1 isoform c	+	190648810	190742355
ASHG19A3A014767	103.61	94.1806	82.3394	91.0653	49.3437	70.341	61.4088	6.80801	6.67357	6.52259	6.40083	5.54413	6.05969	5.74209	P	P	P	P	P	P	P	noncoding	ENST00000500441	AC008122.1	Ensembl	4740	chr2	-	190728384	190734541	GTTCAATGGCTCTCTTCATTTGACTATTGTATCGTTCCAAGTCTTTAGTAGCCTTCTCTT	natural antisense	NM_000534	PMS1	PMS1 protein homolog 1 isoform a	+	190648810	190742355
ASHG19A3A014767	103.61	94.1806	82.3394	91.0653	49.3437	70.341	61.4088	6.80801	6.67357	6.52259	6.40083	5.54413	6.05969	5.74209	P	P	P	P	P	P	P	noncoding	ENST00000500441	AC008122.1	Ensembl	4740	chr2	-	190728384	190734541	GTTCAATGGCTCTCTTCATTTGACTATTGTATCGTTCCAAGTCTTTAGTAGCCTTCTCTT	natural antisense	NM_001128143	PMS1	PMS1 protein homolog 1 isoform b	+	190648810	190742355
ASHG19A3A020158	37.7306	25.1639	27.7816	88.4957	72.0034	81.3263	82.9292	5.38668	4.89584	5.02053	6.35704	6.11174	6.26168	6.19287	A	P	P	P	P	P	P	noncoding	uc002zvv.2	BC089413	UCSC_knowngene	359	chr22	+	22380461	22380948	TACCAACAGATTTCTCACGGTGCTCCCAAAACTGTGATGTTTGGAAATTCTCTGCCCTCA	intergenic
ASHG19A3A026918	193.825	191.475	158.839	275.407	302.794	332.037	350.813	7.65985	7.63242	7.41481	8.06487	8.27555	8.379	8.37688	P	P	P	P	P	M	P	noncoding	NR_026578	LOC647859	RefSeq_NR	578	chr5	-	70370029	70388897	AGAGCAGGAAGGTCAAAGAGAACAGAGCAAGATCACTATGAGACAGACTACACAACTGGT	intergenic
ASHG19A3A037865	1712.23	1728.41	1543.35	429.573	452.923	530.029	380.59	10.5898	10.6066	10.5093	8.74282	8.88494	9.09287	8.50009	P	P	P	P	P	P	P	noncoding	ENST00000449233	RP11-380I20.2	Ensembl	177	chr9	-	110616063	110616539	ATGAAAAAGCAGAGTGACTTGGTTAAGGGGAAAGCACCAAGATGATGGGCTTTCTGTTGC	intergenic
ASHG19A3A029430	119.216	112.968	94.702	195.529	81.5043	128.096	89.5331	6.99744	6.91678	6.71191	7.54093	6.29958	6.94242	6.30591	P	P	P	P	M	P	P	noncoding	ENST00000455973	RP11-359N11.1	Ensembl	470	chr6	-	14230005	14231801	TAGGCTCTGCAAATTTCATCCCCACCTTTGGCCCTTCAGGCCTAGGGCAAGTCACAGCTC	intergenic
ASHG19A3A046779	48.0245	42.7762	40.6292	81.6119	26.4404	47.1655	40.8949	5.7261	5.6027	5.54413	6.2371	4.60742	5.45878	5.13455	P	P	P	P	P	P	P	noncoding	ENST00000447519	AP001189.4	Ensembl	1426	chr11	+	76368099	76374910	ATTCCTTACTTAAAGCAGAAACAACAAAATGACCTGTGATGGAGCCCCAGCTGTGTCAGG	natural antisense	NM_005512	LRRC32	leucine-rich repeat-containing protein 32	-	76368567	76381044
ASHG19A3A046779	48.0245	42.7762	40.6292	81.6119	26.4404	47.1655	40.8949	5.7261	5.6027	5.54413	6.2371	4.60742	5.45878	5.13455	P	P	P	P	P	P	P	noncoding	ENST00000447519	AP001189.4	Ensembl	1426	chr11	+	76368099	76374910	ATTCCTTACTTAAAGCAGAAACAACAAAATGACCTGTGATGGAGCCCCAGCTGTGTCAGG	natural antisense	NM_001128922	LRRC32	leucine-rich repeat-containing protein 32	-	76368567	76381791
ASHG19A3A051682	62.0853	47.2317	59.6169	94.0709	58.2938	69.623	64.1983	6.08454	5.73554	6.07116	6.44709	5.8009	6.04255	5.81209	P	P	P	P	P	P	P	noncoding	ENST00000500463	AL138478.1	Ensembl	3509	chr14	+	89622525	89627743	CGGCTGTTAAAAGATGGATCGTTTTAAAAACTGTGTTTTCCTTCCTTAATTTTTGGTCAG	natural antisense	NM_005197	FOXN3	forkhead box protein N3 isoform 2	-	89622515	89883454
ASHG19A3A051682	62.0853	47.2317	59.6169	94.0709	58.2938	69.623	64.1983	6.08454	5.73554	6.07116	6.44709	5.8009	6.04255	5.81209	P	P	P	P	P	P	P	noncoding	ENST00000500463	AL138478.1	Ensembl	3509	chr14	+	89622525	89627743	CGGCTGTTAAAAGATGGATCGTTTTAAAAACTGTGTTTTCCTTCCTTAATTTTTGGTCAG	natural antisense	NM_001085471	FOXN3	forkhead box protein N3 isoform 1	-	89622515	90085494
ASHG19A3A035292	78.3769	71.5438	54.8741	106.292	42.0903	69.5725	59.8983	6.42598	6.29339	5.95755	6.62349	5.30757	6.04083	5.70445	P	P	P	P	P	M	P	noncoding	G30724		misc_RNA	296	chr7	+	149279465	149279761	AAGTCTGCCTTTTTATGACTCCTTGTACATTTGAAGGCCAGCTTTCCCCTAAAGCCATCC	intergenic
ASHG19A3A046958	16.1773	7.53954	13.0202	43.6584	37.6973	39.7353	45.4084	4.17859	3.47281	3.97242	5.28987	5.14136	5.19949	5.28885	A	A	A	P	P	M	P	noncoding	BC029570		misc_RNA	883	chr11	+	112263840	112412637	GAGACAGAAGAACTAAAACTCAGAGTGACCACCAATGCAGCTATGAAACAGGTGGCAACA	intergenic
ASHG19A3A049011	57.7694	65.0849	66.9757	87.3747	48.791	41.5837	50.0671	5.98564	6.16306	6.23015	6.33863	5.52775	5.26746	5.43634	P	P	P	P	P	P	P	noncoding	ENST00000500685	AC007622.1	Ensembl	1680	chr12	+	108130365	108153745	AAGTATTACACCGTGAAGAAAACAACTGCTGGCATCCCCAAGACACACAGGCACACATAT	natural antisense	NM_012406	PRDM4	PR domain zinc finger protein 4	-	108126642	108154914
ASHG19A3A053634	599.02	582.086	509.462	638.227	652.798	638.074	662.556	9.17201	9.12476	8.99223	9.35555	9.44623	9.37104	9.3523	P	P	P	P	M	P	M	noncoding	uc010vds.1	IMAA	UCSC_knowngene	1587	chr16	-	29564406	29606709	TATTAGTTGGATGGCATAGAGATCATACTCAGAAACCTTCGCTCACGCAGCAGGTATCTG	intergenic
ASHG19A3A032566	10.9686	9.57104	17.6357	27.1728	23.5863	14.6494	9.00108	3.64561	3.72362	4.39082	4.57729	4.43445	3.66678	2.78775	A	A	P	A	P	M	P	noncoding	ENST00000414127	AC003985.1	Ensembl	362	chr7	-	25360920	25366434	TGGAGGCGACAGCACAGGCTTCTGATTAGTTCACACATCACTCACCAATTAGAATAGAAG	intergenic
ASHG19A3A022657	1062.92	1031	1370.24	1129.23	720.046	575.721	585.787	9.9386	9.89638	10.3473	10.2271	9.59127	9.22125	9.16672	P	P	P	P	P	M	P	noncoding	AF088021		misc_RNA	579	chr3	+	51698596	51699165	GGTTTTATCTTAAAAGAACACACCAGTCATTCTGGGTCTCCCCTTATTGCCATTGCCAGG	intergenic
ASHG19A3A050888	15.6353	5.62959	5	38.2774	23.9298	17.6972	21.7088	4.13293	2.75958	2.39437	5.08942	4.45648	3.96733	4.15965	A	A	A	P	P	P	P	noncoding	uc001xil.2	BX161428	UCSC_knowngene	1441	chr14	-	65679611	65689065	GCCTCCATTCTGAGTGCTTATTAACCCTGAAACTTTTGTCAGCTCAGGAAAAAGCAAAAG	intergenic
ASHG19A3A046797	8.71198	5.61677	6.31388	57.1776	68.2987	65.7427	78.351	3.32912	2.7384	3.04068	5.68947	6.03777	5.95584	6.10897	A	A	A	P	P	P	M	noncoding	uc001ozj.2	BC042472	UCSC_knowngene	698	chr11	+	78244221	78269592	GCACTGAACCGGAGAAAGCAGTTACATACAAATTTTGTCATTTGATAGAATCAACCAAAT	intronic antisense	NM_024678	NARS2	probable asparaginyl-tRNA synthetase,	-	78147015	78285909
ASHG19A3A048199	918.751	947.252	774.69	1248.37	1259.9	1274.72	1402.52	9.73807	9.78601	9.56787	10.3765	10.4203	10.4221	10.4866	P	P	P	P	P	P	M	noncoding	CR625009		misc_RNA	1471	chr12	-	133681529	133682999	GCTCATATTTGGTATAATTATGTCTTTTCTGGGACCTATTTGAGGGTGGAATGTGGGAGG	natural antisense	NM_003440	ZNF140	zinc finger protein 140	+	133657036	133684258
ASHG19A3A010912	1433.55	1346.37	1143.33	2675.43	2711.94	2300.14	2961.64	10.3486	10.2667	10.0963	11.4866	11.5457	11.2796	11.5912	P	P	P	P	P	M	M	noncoding	NR_027064	PLAC2	RefSeq_NR	3693	chr19	-	5558179	5568005	CAGCTTGGAACTAGATACAGAAATGCTGTTTTGAGAGTGTACTGAATAAAAGATTACATG	intergenic
ASHG19A3A015287	5	5.46827	5	237.647	225.154	233.161	258.647	2.37766	2.49893	2.39437	7.83875	7.82709	7.85111	7.9191	A	A	A	P	P	M	M	noncoding	BX538340		misc_RNA	3287	chr2	+	9246721	9249987	TAAAATGTGATCTATTAGCACAGCTAGGGACGTAGGACTATGCCTGTAATAGCAAAAGTA	intergenic
ASHG19A3A012293	120.911	104.727	103.08	135.735	107.195	58.9371	81.7941	7.01595	6.81396	6.82818	6.98507	6.70528	5.78695	6.17477	P	P	P	P	M	M	P	noncoding	ENST00000435973	RP11-286M16.1	Ensembl	385	chr1	-	230011296	230021499	TAAGAAGAATAACTCCCATTCCTCATGCATGAGACCCTCTGCTAAATGCTTCCTGTGCAC	intergenic
ASHG19A3A034402	83.0319	76.4608	70.6548	313.827	330.995	285.713	347.182	6.50172	6.3824	6.30354	8.26312	8.41043	8.16022	8.36033	P	P	P	P	M	P	P	noncoding	ENST00000512399	RP11-548K12.8	Ensembl	199	chr7	+	57832888	57833087	TCTTTTCGTGGCTCTTCTCTGAGAAATGAAGCCACACCACGATACAGTCTTGAAGAGGAA	intergenic
ASHG19A3A054987	378.042	352.958	352.923	463.185	268.723	315.726	562.192	8.56343	8.4565	8.50546	8.86602	8.10456	8.31072	9.11064	P	P	P	P	P	M	M	noncoding	NR_028502	C17orf91	RefSeq_NR	2659	chr17	-	1614798	1619566	TAACTGCTGCTACTCTGTTTCTTTCCTCACTTTGCTTTCCAAGGTGGTATGTGATCCCCA	bidirectional	NM_152348	WDR81	WD repeat-containing protein 81 isoform 2	+	1619816	1641893
ASHG19A3A054987	378.042	352.958	352.923	463.185	268.723	315.726	562.192	8.56343	8.4565	8.50546	8.86602	8.10456	8.31072	9.11064	P	P	P	P	P	M	M	noncoding	NR_028502	C17orf91	RefSeq_NR	2659	chr17	-	1614798	1619566	TAACTGCTGCTACTCTGTTTCTTTCCTCACTTTGCTTTCCAAGGTGGTATGTGATCCCCA	bidirectional	NM_001163673	WDR81	WD repeat-containing protein 81 isoform 3	+	1619816	1641893
ASHG19A3A017962	45.8819	37.6257	40.643	61.9377	55.7599	41.2974	66.8174	5.66366	5.43001	5.54478	5.81498	5.7312	5.25559	5.86978	P	P	P	P	M	P	M	noncoding	AK126932		misc_RNA	3658	chr20	+	1301353	1305011	AACATTTAACCAGTAGAGCACTTATATTTTTGTCAGCTGTCCCCTGGGAGAGCAGGGAGT	intronic antisense	NM_080489	SDCBP2	syntenin-2 isoform a	-	1290554	1309879
ASHG19A3A017962	45.8819	37.6257	40.643	61.9377	55.7599	41.2974	66.8174	5.66366	5.43001	5.54478	5.81498	5.7312	5.25559	5.86978	P	P	P	P	M	P	M	noncoding	AK126932		misc_RNA	3658	chr20	+	1301353	1305011	AACATTTAACCAGTAGAGCACTTATATTTTTGTCAGCTGTCCCCTGGGAGAGCAGGGAGT	intronic antisense	NM_001199784	SDCBP2	syntenin-2 isoform a	-	1290554	1306513
ASHG19A3A038785	86.9897	74.0639	70.6931	90.1091	124.095	105.606	141.913	6.56299	6.33851	6.3045	6.38621	6.92913	6.65222	7.00813	P	P	P	P	P	P	P	noncoding	AK125162		misc_RNA	2114	chr9	+	77305960	77308073	CTGCTTCATCTGATTAACACACACACAAGAAAGAAAAATTACACCCACAGAAAACTGAGT	intergenic
ASHG19A3A049628	73.8267	63.5875	60.7739	99.4566	73.386	54.4471	109.213	6.33962	6.13126	6.09932	6.52585	6.14	5.67255	6.60668	P	P	P	P	P	P	P	noncoding	ENST00000439454	RP11-527N12.1	Ensembl	348	chr13	-	63757233	63801189	GCCTTTGCTACTCCTTGCTGACATTTGGAATTTAACTGAAGTGTCTTGTTAAAAAACATT	intergenic
ASHG19A3L0000199	45.073	30.0753	44.0927	49.7667	67.9338	54.3348	114.168	5.63895	5.12948	5.65922	5.48943	6.02976	5.6691	6.67401	P	P	P	P	M	P	P	noncoding	BX501243	lincRNA-HABP2-1	lincRNA	591	chr10	+	115148152	115149054	CTTTCTTTTTTGACAATTATCTTATTGTCTTTGTGAAGCGATTCGTGCCTCCTGTGAACA	intergenic
ASHG19A3A021424	93.1304	63.3336	75.0772	103.427	107.04	89.0126	111.748	6.65947	6.12556	6.38994	6.58315	6.70352	6.39511	6.64037	P	P	P	P	P	P	P	noncoding	AK124267		misc_RNA	2069	chr3	-	112926241	112928309	AATGTAACAGTCCCTACCAGCACCATTTAGTCAGGAGAATGACACACTGCCTTGTTCCTT	intergenic
ASHG19A3A040695	19.6379	5.36428	18.2186	13.8262	23.4801	17.8715	22.0363	4.46412	2.33947	4.43472	3.5124	4.42906	3.98458	4.18142	A	P	P	P	P	M	A	noncoding	ENST00000448948	RP1-122K4.2	Ensembl	696	chrX	+	13973511	13982023	CCAGCTCCTTCTCTGGAGAAGTTAATTATCAAATCCTAGCAAGAAGGGCAAGTGGTGATG	intergenic
ASHG19A3A034738	18.8007	5.36309	14.167	21.2246	186.11	25.9879	55.8244	4.39941	2.33873	4.08718	4.19175	7.53859	4.56189	5.60145	A	A	A	P	P	P	M	noncoding	ENST00000448506	AC092595.2	Ensembl	942	chr7	+	96483794	96631702	ACAGCAGATTTTGGTTTCAGCAATGAGTTCACCTTGACAACAAGCTGGACTCCTTCTGTG	intergenic
ASHG19A3A036639	14.2303	7.07444	14.5921	93.4506	105.061	105.752	115.432	4.00827	3.40322	4.12789	6.43671	6.67414	6.65431	6.69197	A	A	A	P	M	M	P	noncoding	uc003xtx.1	CR617952	UCSC_knowngene	1537	chr8	+	60031776	60034363	CCAAGGCCCATCAAAAACTAAATGGATGTATTTGTACTAAAAGTTGGGGAAAGTTGAATA	bidirectional	NM_014729	TOX	thymocyte selection-associated high mobility	-	59717976	60031767
ASHG19A3A011489	758.626	574.811	717.818	361.153	959.117	312.544	728.939	9.478	9.10595	9.45997	8.48107	10.0233	8.29458	9.497	P	P	P	P	M	M	M	noncoding	D55638		RNAdb	732	chr19	-	42057937	42058639	GGATTGTCTTTATTTCCCCTGAAGCTTCCCCTCCTGAAGAAAAAAGTTCTCAAACACCCT	intergenic
ASHG19A3A053071	830.569	822.717	725.591	711.993	792.694	772.611	858.912	9.59996	9.60013	9.47371	9.51968	9.73342	9.66257	9.75173	P	P	P	P	P	M	M	noncoding	uc002aya.2	BC014373	UCSC_knowngene	1293	chr15	+	74753605	74773603	GGACCATGATAAAATTCCAGACTCTCGGTAGTTTTTGCGTTCCAAGAAGTAGAGCCTAGA	bidirectional	NM_201265	UBL7	ubiquitin-like protein 7	-	74738317	74753529
ASHG19A3A053071	830.569	822.717	725.591	711.993	792.694	772.611	858.912	9.59996	9.60013	9.47371	9.51968	9.73342	9.66257	9.75173	P	P	P	P	P	M	M	noncoding	uc002aya.2	BC014373	UCSC_knowngene	1293	chr15	+	74753605	74773603	GGACCATGATAAAATTCCAGACTCTCGGTAGTTTTTGCGTTCCAAGAAGTAGAGCCTAGA	bidirectional	NM_032907	UBL7	ubiquitin-like protein 7	-	74738317	74753510
ASHG19A3A025976	17.685	10.757	15.7099	25.073	26.8163	21.4731	33.4275	4.3081	3.85248	4.23619	4.45015	4.62782	4.27004	4.82354	A	A	A	P	M	M	P	noncoding	ENST00000507782	RP11-647P12.1	Ensembl	621	chr4	+	121992583	122001631	ATACGATCTAGAGCAGATCCCTGGGTCATTCATTAACAAAGCTTACGAAGTCCCTGCTGT	intronic antisense	NM_024574	C4orf31	fibronectin type-III domain-containing protein	-	121956781	121993673
ASHG19A3A011797	44.7395	40.4398	40.4831	21.2855	25.4365	11.9334	24.329	5.62583	5.52351	5.53949	4.19522	4.54706	3.33197	4.33848	P	P	P	P	M	A	M	noncoding	NR_003578	ZNF702P	RefSeq_NR	3015	chr19	-	53471504	53496784	TCCAAAAACTCCTGTTACATGAGGAAGACACCAAGAAGAGCAAAGAAAAGGAGCCAGGGT	intergenic
ASHG19A3A034283	28.0663	34.3996	24.4145	36.8988	32.2321	26.4487	43.1061	4.97317	5.309	4.83684	5.03219	4.9061	4.58732	5.21308	P	P	P	P	M	M	M	noncoding	ENST00000443714	AC073325.1	Ensembl	542	chr7	+	45500310	45581781	ATAACTGGTAAATAACCTGGAAAGCGGGTTCAACTAGGAGCCCCCAAAATCATGCTCCTT	intergenic
ASHG19A3A049810	41.2124	26.8638	39.2036	37.2411	67.8019	40.2582	66.6577	5.50736	4.98506	5.49628	5.04705	6.02606	5.2187	5.86581	A	P	P	P	M	P	M	noncoding	AF339825		misc_RNA	477	chr13	-	103241722	103242163	TTTGTTGCCTTCTCCAGCTGTGAGACATTCACTGGAATTTTCAGTAAATAACTTCTTAGG	intergenic
ASHG19A3A038309	1042.84	1019.98	1006.87	447.035	727.167	419.235	737.827	9.91713	9.88263	9.92524	8.8058	9.60435	8.73211	9.51462	P	P	P	P	M	P	P	noncoding	uc003zhu.2	BC069756	UCSC_knowngene	1364	chr9	+	3479873	3481237	TCAACCTAGCTAGGCTCCATTCTCCTCCCTATTAATAAAATTATAACCATCATCAATTAC	intronic antisense	NM_134428	RFX3	transcription factor RFX3 isoform b	-	3224646	3525983
ASHG19A3A038309	1042.84	1019.98	1006.87	447.035	727.167	419.235	737.827	9.91713	9.88263	9.92524	8.8058	9.60435	8.73211	9.51462	P	P	P	P	M	P	P	noncoding	uc003zhu.2	BC069756	UCSC_knowngene	1364	chr9	+	3479873	3481237	TCAACCTAGCTAGGCTCCATTCTCCTCCCTATTAATAAAATTATAACCATCATCAATTAC	intronic antisense	NM_002919	RFX3	transcription factor RFX3 isoform a	-	3247036	3525983
ASHG19A3A050225	43.2557	38.3978	36.3536	42.91	86.395	54.6507	97.6741	5.57907	5.45781	5.39128	5.25837	6.38263	5.67663	6.43285	P	P	P	P	M	P	M	noncoding	ENST00000431223	RP11-252B20.1	Ensembl	2055	chr13	+	56788506	56791076	TAAAATGTACATGTGGGTGATAACCCTGACTCTGTTCAGCCTGCACCAAGTAGATTCCTT	intergenic
ASHG19A3A028263	33.1986	18.6642	20.3117	217.434	253.142	263.295	290.172	5.21108	4.52079	4.58925	7.69812	8.01693	8.03232	8.096	A	P	P	P	M	M	M	noncoding	uc003jsf.3	PART1	UCSC_knowngene	2315	chr5	+	59783539	59787091	GAAAAATAGTTGCTTTTTAAAATGTCAGCAAGAAGGCCTGCCTCATCTTAACAAAGCAAA	natural antisense	NM_001165899	PDE4D	cAMP-specific 3',5'-cyclic phosphodiesterase 4D	-	58264865	59783925
ASHG19A3A020318	3188.39	3326.05	3191.84	2350.77	2878.14	2702.81	2934.17	11.4804	11.5469	11.5396	11.3089	11.6353	11.508	11.574	P	P	P	P	M	P	M	noncoding	ENST00000432130	RP1-56J10.8	Ensembl	249	chr22	+	30994295	31002674	GGCCTGGCTGGTCTGGGGCCAGCGGCACCCACCCTCCCCTCAATTGCCCAACTCCCCCCC	intergenic
ASHG19A3L0002225	34039.9	37670.6	32418.2	9515.4	9974.34	10194.6	10660.8	14.8027	14.9871	14.8201	13.3719	13.4609	13.4635	13.4545	P	P	P	P	M	P	M	noncoding	BC036853	lincRNA-PDCD1LG2-2	lincRNA	1660	chr9	-	5357968	5630071	GGAGGTGCTCTAAATAACTTTTAGATTTCCTCTCTCTGTGTGCATTACCAATATCTAAGT	exon sense-overlapping	NM_018465	C9orf46	transmembrane protein C9orf46	-	5357966	5437937
ASHG19A3L0002225	34039.9	37670.6	32418.2	9515.4	9974.34	10194.6	10660.8	14.8027	14.9871	14.8201	13.3719	13.4609	13.4635	13.4545	P	P	P	P	M	P	M	noncoding	BC036853	lincRNA-PDCD1LG2-2	lincRNA	1660	chr9	-	5357968	5630071	GGAGGTGCTCTAAATAACTTTTAGATTTCCTCTCTCTGTGTGCATTACCAATATCTAAGT	intronic antisense	NM_025239	PDCD1LG2	programmed cell death 1 ligand 2 precursor	+	5510544	5571282
ASHG19A3L0002225	34039.9	37670.6	32418.2	9515.4	9974.34	10194.6	10660.8	14.8027	14.9871	14.8201	13.3719	13.4609	13.4635	13.4545	P	P	P	P	M	P	M	noncoding	BC036853	lincRNA-PDCD1LG2-2	lincRNA	1660	chr9	-	5357968	5630071	GGAGGTGCTCTAAATAACTTTTAGATTTCCTCTCTCTGTGTGCATTACCAATATCTAAGT	intronic antisense	NM_001135920	KIAA1432	protein RIC1 homolog isoform b	+	5629118	5769454
ASHG19A3L0002225	34039.9	37670.6	32418.2	9515.4	9974.34	10194.6	10660.8	14.8027	14.9871	14.8201	13.3719	13.4609	13.4635	13.4545	P	P	P	P	M	P	M	noncoding	BC036853	lincRNA-PDCD1LG2-2	lincRNA	1660	chr9	-	5357968	5630071	GGAGGTGCTCTAAATAACTTTTAGATTTCCTCTCTCTGTGTGCATTACCAATATCTAAGT	intronic antisense	NM_001206557	KIAA1432	protein RIC1 homolog isoform c	+	5629118	5776556
ASHG19A3L0002225	34039.9	37670.6	32418.2	9515.4	9974.34	10194.6	10660.8	14.8027	14.9871	14.8201	13.3719	13.4609	13.4635	13.4545	P	P	P	P	M	P	M	noncoding	BC036853	lincRNA-PDCD1LG2-2	lincRNA	1660	chr9	-	5357968	5630071	GGAGGTGCTCTAAATAACTTTTAGATTTCCTCTCTCTGTGTGCATTACCAATATCTAAGT	intronic antisense	NM_020829	KIAA1432	protein RIC1 homolog isoform a	+	5629118	5776556
ASHG19A3L0002225	34039.9	37670.6	32418.2	9515.4	9974.34	10194.6	10660.8	14.8027	14.9871	14.8201	13.3719	13.4609	13.4635	13.4545	P	P	P	P	M	P	M	noncoding	BC036853	lincRNA-PDCD1LG2-2	lincRNA	1660	chr9	-	5357968	5630071	GGAGGTGCTCTAAATAACTTTTAGATTTCCTCTCTCTGTGTGCATTACCAATATCTAAGT	intronic antisense	NM_014143	CD274	programmed cell death 1 ligand 1 precursor	+	5450502	5470567
ASHG19A3A037489	19.9729	23.3421	18.0363	38.1233	47.1907	41.3782	45.4179	4.48566	4.79976	4.42184	5.08376	5.48021	5.25898	5.28964	A	P	P	P	M	M	M	noncoding	ENST00000444638	RP11-318K12.3	Ensembl	292	chr9	-	66836846	66837138	CACAGAGCTGTCTTCTGTGGTAATCTGGAGAAAGTGAAATACCTTTGTCTGAGTAGTTGT	intergenic
ASHG19A3A044659	4272.7	4889.94	4108.63	2094.89	2426.76	2513.49	2744.17	11.895	12.102	11.904	11.1344	11.382	11.4113	11.4637	P	P	P	P	M	P	P	noncoding	ENST00000417351	CTAGE7	Ensembl	2823	chr10	+	131904272	131907095	CTGGCAATATTTTTGCTCTCTTCAAAAGTAATTCTGACTGATCTCATTTCAAGTAACTGC	intergenic
ASHG19A3A007744	110.064	124.159	113.038	76.2358	109.42	128.553	136.53	6.88449	7.04675	6.95414	6.12946	6.7372	6.94638	6.94849	P	P	P	P	M	P	M	noncoding	NR_033233	MOCS1	RefSeq_NR	3969	chr6	-	39872034	39902290	GGCAGGAAGAAGCGGCAGCATGCAGAGTTATTTTTGATGTTCCCCAATTCCCCACCAGCC	natural antisense	NM_001201427	DAAM2	disheveled-associated activator of morphogenesis	+	39760158	39872653
ASHG19A3A007744	110.064	124.159	113.038	76.2358	109.42	128.553	136.53	6.88449	7.04675	6.95414	6.12946	6.7372	6.94638	6.94849	P	P	P	P	M	P	M	noncoding	NR_033233	MOCS1	RefSeq_NR	3969	chr6	-	39872034	39902290	GGCAGGAAGAAGCGGCAGCATGCAGAGTTATTTTTGATGTTCCCCAATTCCCCACCAGCC	natural antisense	NM_015345	DAAM2	disheveled-associated activator of morphogenesis	+	39760772	39872653
ASHG19A3A007744	110.064	124.159	113.038	76.2358	109.42	128.553	136.53	6.88449	7.04675	6.95414	6.12946	6.7372	6.94638	6.94849	P	P	P	P	M	P	M	noncoding	NR_033233	MOCS1	RefSeq_NR	3969	chr6	-	39872034	39902290	GGCAGGAAGAAGCGGCAGCATGCAGAGTTATTTTTGATGTTCCCCAATTCCCCACCAGCC	exon sense-overlapping	NM_001075098	MOCS1	molybdenum cofactor biosynthesis protein 1	-	39872033	39902290
ASHG19A3A007744	110.064	124.159	113.038	76.2358	109.42	128.553	136.53	6.88449	7.04675	6.95414	6.12946	6.7372	6.94638	6.94849	P	P	P	P	M	P	M	noncoding	NR_033233	MOCS1	RefSeq_NR	3969	chr6	-	39872034	39902290	GGCAGGAAGAAGCGGCAGCATGCAGAGTTATTTTTGATGTTCCCCAATTCCCCACCAGCC	exon sense-overlapping	NM_005943	MOCS1	molybdenum cofactor biosynthesis protein 1	-	39872033	39895455
ASHG19A3A035078	5206.73	6100.79	4756.05	2570.32	5201.07	5066.26	5309.52	12.1756	12.424	12.1033	11.4323	12.4936	12.4279	12.4234	P	P	P	P	M	P	M	noncoding	HIT000338917		H-invDB	649	chr7	+	130147498	130148146	CAAAACCAACCCCCTCCCCAAATCATTTTAAATAAAACTGATCTCAATGAAAATCATGTC	natural antisense	NM_012133	COPG2	coatomer subunit gamma-2	-	130146079	130353598
ASHG19A3A026163	935.894	1097.56	850.2	384.976	354.63	375.031	435.969	9.76947	9.97993	9.69627	8.57315	8.5061	8.5598	8.70542	P	P	P	P	M	P	M	noncoding	BC034819		NRED	2882	chr4	+	153457444	153460292	GTGGCTTTTACTGTCAAAGATTGTGTAAGCTAAATTATCTGGCAAAATTTTGCTTTCCAG	intergenic
ASHG19A3A048687	199.63	252.292	201.239	221.152	278.539	294.7	303.599	7.69986	8.00212	7.74009	7.72577	8.15855	8.21017	8.16413	P	P	P	P	M	P	M	noncoding	ENST00000452388	OR6C5P	Ensembl	923	chr12	+	55705618	55706541	CAAAGGAGTAGCTATTCTGAACACTTCAATTGCCCCCATGCTGAACCCTTCTATTTACAC	intergenic
ASHG19A3A041539	91.7088	115.629	99.3256	156.465	124.47	133.411	153.504	6.63512	6.94849	6.7761	7.20123	6.93324	7.00511	7.12697	P	P	P	P	M	P	M	noncoding	ENST00000441399	RP5-842K24.2	Ensembl	3474	chrX	+	131352534	131566890	TATTCTCCTTGCTGGTATTTCTTCCACTTGCTATTTTGCTGAGAGATGCATGCAAACTAC	bidirectional	NM_021183	RAP2C	ras-related protein Rap-2c precursor	-	131337052	131352189
ASHG19A3A041539	91.7088	115.629	99.3256	156.465	124.47	133.411	153.504	6.63512	6.94849	6.7761	7.20123	6.93324	7.00511	7.12697	P	P	P	P	M	P	M	noncoding	ENST00000441399	RP5-842K24.2	Ensembl	3474	chrX	+	131352534	131566890	TATTCTCCTTGCTGGTATTTCTTCCACTTGCTATTTTGCTGAGAGATGCATGCAAACTAC	intronic antisense	NM_001170701	MBNL3	muscleblind-like protein 3 isoform 3	-	131503342	131547603
ASHG19A3A041539	91.7088	115.629	99.3256	156.465	124.47	133.411	153.504	6.63512	6.94849	6.7761	7.20123	6.93324	7.00511	7.12697	P	P	P	P	M	P	M	noncoding	ENST00000441399	RP5-842K24.2	Ensembl	3474	chrX	+	131352534	131566890	TATTCTCCTTGCTGGTATTTCTTCCACTTGCTATTTTGCTGAGAGATGCATGCAAACTAC	intronic antisense	NM_001170703	MBNL3	muscleblind-like protein 3 isoform 5	-	131503342	131547636
ASHG19A3A041539	91.7088	115.629	99.3256	156.465	124.47	133.411	153.504	6.63512	6.94849	6.7761	7.20123	6.93324	7.00511	7.12697	P	P	P	P	M	P	M	noncoding	ENST00000441399	RP5-842K24.2	Ensembl	3474	chrX	+	131352534	131566890	TATTCTCCTTGCTGGTATTTCTTCCACTTGCTATTTTGCTGAGAGATGCATGCAAACTAC	intronic antisense	NM_133486	MBNL3	muscleblind-like protein 3 isoform 2	-	131503342	131573718
ASHG19A3A041539	91.7088	115.629	99.3256	156.465	124.47	133.411	153.504	6.63512	6.94849	6.7761	7.20123	6.93324	7.00511	7.12697	P	P	P	P	M	P	M	noncoding	ENST00000441399	RP5-842K24.2	Ensembl	3474	chrX	+	131352534	131566890	TATTCTCCTTGCTGGTATTTCTTCCACTTGCTATTTTGCTGAGAGATGCATGCAAACTAC	intronic antisense	NM_018388	MBNL3	muscleblind-like protein 3 isoform 1	-	131503342	131573718
ASHG19A3A041539	91.7088	115.629	99.3256	156.465	124.47	133.411	153.504	6.63512	6.94849	6.7761	7.20123	6.93324	7.00511	7.12697	P	P	P	P	M	P	M	noncoding	ENST00000441399	RP5-842K24.2	Ensembl	3474	chrX	+	131352534	131566890	TATTCTCCTTGCTGGTATTTCTTCCACTTGCTATTTTGCTGAGAGATGCATGCAAACTAC	intronic antisense	NM_001170702	MBNL3	muscleblind-like protein 3 isoform 4	-	131503342	131547603
ASHG19A3A041539	91.7088	115.629	99.3256	156.465	124.47	133.411	153.504	6.63512	6.94849	6.7761	7.20123	6.93324	7.00511	7.12697	P	P	P	P	M	P	M	noncoding	ENST00000441399	RP5-842K24.2	Ensembl	3474	chrX	+	131352534	131566890	TATTCTCCTTGCTGGTATTTCTTCCACTTGCTATTTTGCTGAGAGATGCATGCAAACTAC	intronic antisense	NM_001170704	MBNL3	muscleblind-like protein 3 isoform 5	-	131503342	131623996
ASHG19A3A016139	58.191	82.6266	54.4086	43.3013	60.1888	55.2989	65.3526	5.99654	6.48729	5.94517	5.27327	5.84851	5.69445	5.83648	P	P	P	P	P	P	M	noncoding	ENST00000427208	AC019100.5	Ensembl	1875	chr2	+	108938693	108970255	ATATTGAGAAAAGCAGGCGCGCTTCCATTCAACTTCAACACCCTTTCCTGGAGTGGATAA	intergenic
ASHG19A3H0000061	21251.6	27183.7	13983	10881.2	13430.3	17286.5	19298.1	14.1288	14.5115	13.6103	13.5763	13.9092	14.2439	14.3232	P	P	P	P	M	M	P	noncoding	nc-HOXB9-184-	nc-HOXB9-184	HOX cluster	198	chr17	-	46703989	46704187	CCCTTGCTCTCCCTCCCTCCCCGACCCGCCTGGGGAGAGGGCTCTACAGCCTGCGTCCCT	intergenic
ASHG19A3A046484	240.24	296.85	176.726	161.193	437.31	504.367	533.262	7.94302	8.21784	7.56577	7.24787	8.82865	9.02564	9.02217	P	P	P	P	M	P	P	noncoding	uc001nry.2	BC040894	UCSC_knowngene	2344	chr11	+	61355965	61375017	ACCTTCAACCCCTGAGCTTTCCTGCCTTCGAGTCCTCGGAGCTCTCCTGGAGGCTGAGCA	intergenic
ASHG19A3L0002292	25.2886	32.3682	18.1217	18.3547	183.724	51.0846	44.7448	4.83108	5.23127	4.42672	3.96994	7.5174	5.57391	5.27007	P	P	P	P	M	M	P	noncoding	chrX:38863681-38944131-	lincRNA-MID1IP1-2	lincRNA	80451	chrX	-	38863681	38944131	TTAATTAGGTGCCTAACCTTGATTGCAGGGAGTCAGGATATCTCTCCAACTCCACCTTCT	intergenic
ASHG19A3A049051	215.718	256.145	178.626	223.855	495.045	260.084	268.296	7.79922	8.02189	7.58126	7.74509	9.02673	8.01477	7.97368	P	P	P	M	M	M	M	noncoding	ENST00000424240	ADAM1	Ensembl	2129	chr12	+	112337066	112339195	ACGTGTAATGGGAAGGGAGTTTGTAATGATTTAGGGCACTGCCACTGTAATGAAGGGCAT	intergenic
ASHG19A3A044502	1685.66	1362.45	1322.9	3167.12	2811.32	2716.7	3019.24	10.5649	10.2834	10.295	11.7395	11.5974	11.5179	11.6147	P	P	P	P	M	M	M	noncoding	uc001laa.2	AL050000	UCSC_knowngene	4228	chr10	+	114583254	114587482	GGAAATGTGGCTCTACATATCGTTAGTACAAGTAATACATTTTGATTGTTGTTTCCTGGA	intergenic
ASHG19A3A040151	11849.6	9799.67	9341.8	7044.27	6697.61	6080.06	6805.08	13.3232	13.0777	13.0562	12.919	12.8684	12.7133	12.7969	P	P	P	P	P	P	P	noncoding	ENST00000456632	RP11-236M5.1	Ensembl	1027	chrX	-	92542731	92543758	TCAACCTAGGGCACAGAAAATTGCAGAACATCGGAGAAAGTATGGGTGAAAAAGTGAAGA	intergenic
ASHG19A3A033960	129872	79597.3	109792	40657.5	38365.5	25297.9	40103.6	16.7001	16.0772	16.5762	15.5243	15.3994	14.7912	15.402	P	P	P	P	P	P	P	noncoding	ENST00000434621	GAPDHL13	Ensembl	1008	chr7	+	9654607	9655615	CATTTCCTGATATGACAATGAATTTGGCTACAGCAACAGGGTGGTGAACCTCATGACCCA	intergenic
ASHG19A3A026458	40773	36857.5	22987.5	25469	25058.1	22337	23212.8	15.0671	14.949	14.3192	14.831	14.8001	14.6025	14.5968	P	P	P	P	P	P	P	noncoding	ENST00000412047	RP4-581O6.1	Ensembl	152	chr1	+	100308165	100308317	TGGTAATAAAATCAGGTAGAACTCCAAAAGGAGACATTGGAGAAGAATCAAGCTGGGTCT	intergenic
ASHG19A3A047649	95.4978	99.602	75.9046	105.783	97.8297	115.209	104.789	6.69388	6.7483	6.4052	6.61659	6.56591	6.77998	6.54274	P	P	P	P	P	P	P	noncoding	NR_026658	LOC100240735	RefSeq_NR	917	chr12	-	54472623	54475607	CATCCGGCTTTATGTACATGTGATATCCTGACAGATTTATATCTCTGAACAGCTATATAG	intergenic
ASHG19A3A016173	48610.3	48540.7	44505.4	25321.5	24981.6	26887.1	25358.7	15.3057	15.3332	15.2648	14.8196	14.7961	14.8818	14.7327	P	P	P	P	P	P	P	noncoding	ENST00000401483	AC114776.1	Ensembl	387	chr2	+	111391523	111391910	TACAAATTACGTTCCTTCCAAATTAACCAGGACGAAGAAGAGGAGGAAGACGAGGATTAA	intergenic
ASHG19A3A036744	129.314	114.675	123.851	23.5769	14.1777	22.0317	23.6984	7.10495	6.93573	7.08136	4.35442	3.64908	4.31113	4.29586	P	P	P	P	A	P	P	noncoding	ENST00000509499	RP11-69I13.1	Ensembl	856	chr8	+	89497338	89498323	CCCAGTGCCTAATGAAAATAGATACATTCCTGATTGGGTACCAGTATAGAAAAACAACAA	intergenic
ASHG19A3L0001219	138.214	125.688	102.2	50.2845	32.0891	49.2731	35.585	7.19501	7.06299	6.81545	5.50546	4.90057	5.52279	4.92357	P	P	P	P	P	P	P	noncoding	BX101700	lincRNA-TACR1-1	lincRNA	720	chr2	-	75555040	75555760	AAATGAATAGCTGATACTCCTCCTTCATCAGAGAACTTGTGAGGCAGAAAGCGGGGAAAG	intergenic
ASHG19A3A007350	2276.83	2283.11	1862.03	1618.05	994.146	1487.86	998.743	11.0123	11.0174	10.7834	10.7538	10.0757	10.6386	9.98288	P	P	P	P	P	P	P	noncoding	NR_024588	KIAA0652	RefSeq_NR	4680	chr11	+	46638825	46696367	TTTTTCCACCTCCCCACCATCCCAGCTCTCAAGCTCTCGCCTTTCCTATCAGCCTGCTGC	exon sense-overlapping	NM_001205121	ATG13	autophagy-related protein 13 isoform 2	+	46638825	46697568
ASHG19A3A007350	2276.83	2283.11	1862.03	1618.05	994.146	1487.86	998.743	11.0123	11.0174	10.7834	10.7538	10.0757	10.6386	9.98288	P	P	P	P	P	P	P	noncoding	NR_024588	KIAA0652	RefSeq_NR	4680	chr11	+	46638825	46696367	TTTTTCCACCTCCCCACCATCCCAGCTCTCAAGCTCTCGCCTTTCCTATCAGCCTGCTGC	exon sense-overlapping	NM_001205119	ATG13	autophagy-related protein 13 isoform 3	+	46638825	46697568
ASHG19A3A007350	2276.83	2283.11	1862.03	1618.05	994.146	1487.86	998.743	11.0123	11.0174	10.7834	10.7538	10.0757	10.6386	9.98288	P	P	P	P	P	P	P	noncoding	NR_024588	KIAA0652	RefSeq_NR	4680	chr11	+	46638825	46696367	TTTTTCCACCTCCCCACCATCCCAGCTCTCAAGCTCTCGCCTTTCCTATCAGCCTGCTGC	bidirectional	NM_173811	HARBI1	putative nuclease HARBI1	-	46624855	46638777
ASHG19A3A007350	2276.83	2283.11	1862.03	1618.05	994.146	1487.86	998.743	11.0123	11.0174	10.7834	10.7538	10.0757	10.6386	9.98288	P	P	P	P	P	P	P	noncoding	NR_024588	KIAA0652	RefSeq_NR	4680	chr11	+	46638825	46696367	TTTTTCCACCTCCCCACCATCCCAGCTCTCAAGCTCTCGCCTTTCCTATCAGCCTGCTGC	exon sense-overlapping	NM_001205120	ATG13	autophagy-related protein 13 isoform 1	+	46638825	46697568
ASHG19A3A007350	2276.83	2283.11	1862.03	1618.05	994.146	1487.86	998.743	11.0123	11.0174	10.7834	10.7538	10.0757	10.6386	9.98288	P	P	P	P	P	P	P	noncoding	NR_024588	KIAA0652	RefSeq_NR	4680	chr11	+	46638825	46696367	TTTTTCCACCTCCCCACCATCCCAGCTCTCAAGCTCTCGCCTTTCCTATCAGCCTGCTGC	exon sense-overlapping	NM_014741	ATG13	autophagy-related protein 13 isoform 2	+	46638825	46697568
ASHG19A3A007350	2276.83	2283.11	1862.03	1618.05	994.146	1487.86	998.743	11.0123	11.0174	10.7834	10.7538	10.0757	10.6386	9.98288	P	P	P	P	P	P	P	noncoding	NR_024588	KIAA0652	RefSeq_NR	4680	chr11	+	46638825	46696367	TTTTTCCACCTCCCCACCATCCCAGCTCTCAAGCTCTCGCCTTTCCTATCAGCCTGCTGC	exon sense-overlapping	NM_001205122	ATG13	autophagy-related protein 13 isoform 4	+	46638825	46697568
ASHG19A3A007350	2276.83	2283.11	1862.03	1618.05	994.146	1487.86	998.743	11.0123	11.0174	10.7834	10.7538	10.0757	10.6386	9.98288	P	P	P	P	P	P	P	noncoding	NR_024588	KIAA0652	RefSeq_NR	4680	chr11	+	46638825	46696367	TTTTTCCACCTCCCCACCATCCCAGCTCTCAAGCTCTCGCCTTTCCTATCAGCCTGCTGC	exon sense-overlapping	NM_001142673	ATG13	autophagy-related protein 13 isoform 1	+	46638825	46697568
ASHG19A3A018801	101678	101750	89068.8	75541.9	86923.3	91955.3	71854.2	16.3351	16.4004	16.2749	16.4447	16.5719	16.6498	16.2623	P	P	P	P	P	P	P	noncoding	ENST00000444036	AP000281.1	Ensembl	316	chr21	-	34213805	34214121	AGACTTCACCAAGTTCAATGCAGATGAATTTGAAGACATGGTGGCTGAGAAGCGGCTCAT	intergenic
ASHG19A3A029377	1847.06	2024.02	1440.33	2301.42	787.772	909.412	816.681	10.7057	10.8517	10.4104	11.2749	9.7213	9.90426	9.6698	P	P	P	P	P	P	P	noncoding	G36445		misc_RNA	2584	chr6	-	7155256	7157840	GAAAATATTCTTCTAGTGCGACTGAACTATCTCCCTCTGAGAAACCACTTCCCACTAGGC	intronic antisense	NM_001003699	RREB1	ras-responsive element-binding protein 1 isoform	+	7108085	7252213
ASHG19A3A029377	1847.06	2024.02	1440.33	2301.42	787.772	909.412	816.681	10.7057	10.8517	10.4104	11.2749	9.7213	9.90426	9.6698	P	P	P	P	P	P	P	noncoding	G36445		misc_RNA	2584	chr6	-	7155256	7157840	GAAAATATTCTTCTAGTGCGACTGAACTATCTCCCTCTGAGAAACCACTTCCCACTAGGC	intronic antisense	NM_001003698	RREB1	ras-responsive element-binding protein 1 isoform	+	7108085	7252213
ASHG19A3A029377	1847.06	2024.02	1440.33	2301.42	787.772	909.412	816.681	10.7057	10.8517	10.4104	11.2749	9.7213	9.90426	9.6698	P	P	P	P	P	P	P	noncoding	G36445		misc_RNA	2584	chr6	-	7155256	7157840	GAAAATATTCTTCTAGTGCGACTGAACTATCTCCCTCTGAGAAACCACTTCCCACTAGGC	intronic antisense	NM_001003700	RREB1	ras-responsive element-binding protein 1 isoform	+	7108085	7252213
ASHG19A3A029377	1847.06	2024.02	1440.33	2301.42	787.772	909.412	816.681	10.7057	10.8517	10.4104	11.2749	9.7213	9.90426	9.6698	P	P	P	P	P	P	P	noncoding	G36445		misc_RNA	2584	chr6	-	7155256	7157840	GAAAATATTCTTCTAGTGCGACTGAACTATCTCCCTCTGAGAAACCACTTCCCACTAGGC	intronic antisense	NM_001168344	RREB1	ras-responsive element-binding protein 1 isoform	+	7107829	7252213
ASHG19A3A008281	128.382	122.001	112.46	95.0719	46.8772	58.4326	42.1383	7.09496	7.02321	6.94892	6.46248	5.46975	5.77349	5.17901	P	P	P	P	P	P	P	noncoding	ENST00000426038	RP11-357J22.2	Ensembl	703	chr1	-	176336834	176337537	TTTTTCAACTTCATATAGTGCCAACAATTATGAGTGTGGTTCCTCCTGAGTATCATCATT	intergenic
ASHG19A3A039399	26.2401	31.123	16.0273	24.6238	13.0401	14.8827	22.1946	4.88514	5.17613	4.26609	4.42133	3.51027	3.69129	4.19127	P	P	A	P	A	P	P	noncoding	AF129266		misc_RNA	2127	chr9	+	136548432	136550559	AAGTCCCTGTCCTCATGAGACAGATGACAATAAACATGGATTAATAAAAATACACCAAGA	natural antisense	NM_007101	SARDH	sarcosine dehydrogenase, mitochondrial	-	136528683	136605077
ASHG19A3A039399	26.2401	31.123	16.0273	24.6238	13.0401	14.8827	22.1946	4.88514	5.17613	4.26609	4.42133	3.51027	3.69129	4.19127	P	P	A	P	A	P	P	noncoding	AF129266		misc_RNA	2127	chr9	+	136548432	136550559	AAGTCCCTGTCCTCATGAGACAGATGACAATAAACATGGATTAATAAAAATACACCAAGA	natural antisense	NM_001134707	SARDH	sarcosine dehydrogenase, mitochondrial	-	136528683	136603479
ASHG19A3A030715	3275.6	3207.27	2917.32	1713.07	1791.93	1936.27	1925.95	11.5217	11.4973	11.4142	10.8422	10.9325	11.0247	10.9488	P	P	P	P	P	P	P	noncoding	ENST00000405959	RP1-101K10.4	Ensembl	362	chr6	-	153280411	153280773	CAAAAGAGGACAAAAGTCCCCCAGGACATAGAAATGAAGGACCTTGAAGATGAGAGCTAA	intergenic
ASHG19A3A016318	917.283	781.468	693.324	711.447	656.842	680.219	681.566	9.73635	9.52399	9.41508	9.51743	9.45647	9.47212	9.39735	P	P	P	P	P	P	P	noncoding	ENST00000423267	AC012306.2	Ensembl	114	chr2	+	128688900	128689014	TTAACCCAAGAGACACCTGGAATTTTGTGTTTGGACAGGCTTCTTTGACAGATGGTGTGG	intergenic
ASHG19A3A008475	3516.13	3351.18	2962.69	1432.42	1349.82	1379.81	1327.75	11.6127	11.5571	11.4392	10.5861	10.5293	10.5373	10.415	P	P	P	P	P	P	P	noncoding	uc010wkl.1	DQ589083	UCSC_knowngene	1661	chr17	-	45126240	45127901	AACTCTGCTTAGGATTATTTCATTGATCCCCAGGGTCCAATTGCCCAGTGCTCAGTCAAA	intergenic
ASHG19A3A026492	91.1063	91.1832	87.2018	367.66	266.001	262.165	282.318	6.62465	6.62735	6.60286	8.50802	8.08734	8.02528	8.0522	P	P	P	P	P	P	P	noncoding	NR_028351	FLJ33360	RefSeq_NR	2419	chr5	-	6310553	6337405	AGTCATTGACTTTCTTTGTTGTTACTTTCAGCATATCCCCTGTCTGGCACAAAGGGAGCA	intergenic
ASHG19A3A055251	29.4089	29.9393	23.326	34.3946	9.68552	5	7.47563	5.04118	5.12371	4.77342	4.92866	3.06522	2.32995	2.60525	P	P	P	A	A	A	P	noncoding	uc004bcx.2	BC017988	UCSC_knowngene	1311	chr9	+	109213096	109367074	TGAGCTCTCCTCAGATTACAGATTGGGAGTGGCAAATCAAAGGCATTGCAGCCTCTTTCA	intergenic
ASHG19A3A012470	49.3254	31.5043	39.1393	89.2959	31.406	25.9152	21.7665	5.76737	5.19262	5.49482	6.37191	4.87051	4.55674	4.16331	P	P	P	P	P	P	P	noncoding	ENST00000499403	AC073544.1	Ensembl	1178	chr19	+	23928159	23937704	TCCTATGTCTCTTTCTAGTCCAAGGCTCTTTTTCTTGTTCCAGACAGGTGATCAGGTCTG	natural antisense	NM_138286	ZNF681	zinc finger protein 681	-	23921996	23941693
ASHG19A3A051348	366.429	357.685	355.517	205.648	112.641	101.341	96.8598	8.52012	8.47834	8.51766	7.61408	6.78159	6.5897	6.42161	P	P	P	P	P	P	P	noncoding	ENST00000475149	RP11-114O13.1	Ensembl	392	chr14	+	31260303	31260695	ATAGATATGGCATCGATCTTTAGCCTGAGAACTCTCCAGAAATGTTAACGAGATCCTGGG	intergenic
ASHG19A3A011827	87.4585	79.5102	79.5374	47.2926	46.9275	40.3677	40.6874	6.57129	6.43453	6.4745	5.40925	5.47092	5.22166	5.12689	P	P	P	P	P	P	P	noncoding	BC020462		misc_RNA	715	chr19	-	54705040	54711515	TCGATGTGCTTCTGGGAATCCAGGCGGACAATGAAGGACGGGATGTTCACCACCTGCTTG	natural antisense	NM_001013	RPS9	40S ribosomal protein S9	+	54704725	54711515
ASHG19A3A030874	349.327	347.175	330.911	448.854	223.081	205.411	191.532	8.45565	8.43547	8.4195	8.81244	7.81023	7.65498	7.45836	P	P	P	P	P	P	P	noncoding	G36936		misc_RNA	458	chr6	+	996540	996998	AAATGAAACTATAACTTTGAGACACTCCCTAGTCCCCCATTGTGAGCAGGTGCACCCAAT	intergenic
ASHG19A3A024508	361.505	280.604	325.569	187.29	148.633	144.977	155.939	8.5022	8.14706	8.39483	7.47624	7.19949	7.12825	7.14873	P	P	P	P	P	P	P	noncoding	ENST00000507207	RP11-1299A16.1	Ensembl	168	chr4	-	99634954	99635122	AAGAAGGGTATAGAGCCTGGGATGTCTGAACCAATCGTTTTGAGCCTGCTTTGGAGATAA	intergenic
ASHG19A3A028120	116962	116761	99734.6	83765	97109.6	81570.6	94345.3	16.543	16.5918	16.4236	16.6095	16.7359	16.4743	16.6498	P	P	P	P	P	P	P	noncoding	ENST00000477670	CTD-2284O10.1	Ensembl	797	chr5	+	37085157	37085954	ATTTCTCTTCCCCGAGGAAAGGGTATCTGCCTCACTATTGCTGAAGAGAGAGACAAAAGA	intergenic
ASHG19A3A008492	51.4454	40.4653	37.5881	34.3825	27.5129	27.8503	35.1397	5.82169	5.52409	5.4382	4.92841	4.67028	4.66596	4.90326	P	P	P	P	P	P	P	noncoding	ENST00000451140	AC003665.1	Ensembl	1039	chr17	-	45975825	46018776	CCAAGCCAATACTAAGGTCTACTGGTTGGCTGCAACAAGTTTAAAATGTCTTCATAAGGG	bidirectional	NM_018129	PNPO	pyridoxine-5'-phosphate oxidase	+	46018888	46026674
ASHG19A3A008492	51.4454	40.4653	37.5881	34.3825	27.5129	27.8503	35.1397	5.82169	5.52409	5.4382	4.92841	4.67028	4.66596	4.90326	P	P	P	P	P	P	P	noncoding	ENST00000451140	AC003665.1	Ensembl	1039	chr17	-	45975825	46018776	CCAAGCCAATACTAAGGTCTACTGGTTGGCTGCAACAAGTTTAAAATGTCTTCATAAGGG	intronic antisense	NM_003110	SP2	transcription factor Sp2	+	45973515	46006323
ASHG19A3L0000752	140.586	122.454	126.626	166.298	90.8248	123.278	195.097	7.21912	7.0285	7.11016	7.29565	6.45556	6.88649	7.48885	P	P	P	P	M	P	P	noncoding	chr14:66457497-66472547+	lincRNA-GPHN-4	lincRNA	15051	chr14	+	66457497	66472547	GTAGAAAAGATTTGCTCATCCCAAGTCAAGATGTTCTCCCATGTTTTTTCTTAGCAGCTT	intergenic
ASHG19A3A047739	1502.28	1445.84	1329.01	2643.48	3004.38	2707.64	2928.07	10.4137	10.3618	10.3039	11.4706	11.6956	11.5104	11.5705	P	P	P	P	M	P	P	noncoding	AF318328		misc_RNA	1179	chr12	-	58211996	58213155	TTTCACCTATCCCTAGAGAAAGATGGTATGGAGCAAGGCAGGAGGAGTTAAAACCAGCTT	intergenic
ASHG19A3A033794	74.0043	59.1004	65.8074	188.64	147.053	67.2241	198.028	6.34287	6.02957	6.20413	7.48717	7.18303	5.98692	7.50936	P	P	P	P	P	P	P	noncoding	G30861		misc_RNA	277	chr7	-	154721353	154721630	TTCTGTCTATATTATTCCTGCCTGGATGACATAGTGAGGTCTTCACTGCTGGAGAAGGGA	intergenic
ASHG19A3H0000141	66.5056	55.4514	62.9861	171.024	155.18	77.2728	216.466	6.18693	5.94528	6.14803	7.33932	7.26512	6.18945	7.64212	P	P	P	P	P	P	P	noncoding	nc-HOXC6-247-	nc-HOXC6-247	HOX cluster	138	chr12	+	54417941	54418079	CAGTGGCACAAAAGGGGCCAGCGGGGCAACCGTTCTTCTCTTGCTCAGAAAAGTGAGACT	intron sense-overlapping	NM_014620	HOXC4	homeobox protein Hox-C4	+	54410641	54449814
ASHG19A3H0000141	66.5056	55.4514	62.9861	171.024	155.18	77.2728	216.466	6.18693	5.94528	6.14803	7.33932	7.26512	6.18945	7.64212	P	P	P	P	P	P	P	noncoding	nc-HOXC6-247-	nc-HOXC6-247	HOX cluster	138	chr12	+	54417941	54418079	CAGTGGCACAAAAGGGGCCAGCGGGGCAACCGTTCTTCTCTTGCTCAGAAAAGTGAGACT	intron sense-overlapping	NM_153693	HOXC6	homeobox protein Hox-C6 isoform 2	+	54410641	54424607
ASHG19A3L0000937	1244.07	914.544	1106.38	780.019	875.896	432.769	973.459	10.147	9.74197	10.0498	9.66369	9.8831	8.77932	9.94397	P	P	P	P	P	P	P	noncoding	exon1959+	lincRNA-RBBP8-2	lincRNA	93	chr18	+	20043793	20043885	AAGATGTCAAGGACACACACCAAGCCCATCTTGTTCAAAACCTAATGAGCTCCCCTCCCT
ASHG19A3A024990	1155.12	1099.22	1065.68	403.76	451.559	453.05	469.247	10.0506	9.98154	9.99765	8.64895	8.87929	8.85575	8.81993	P	P	P	P	P	P	P	noncoding	ENST00000513791	RP11-485C11.1	Ensembl	460	chr4	-	173301178	173301638	ATCCATTAGCAAATGATGCAGAGGAGCAGTGGAAACACCAACGAAGCCCAAGCCATATAA	intronic antisense	NM_001034845	GALNTL6	polypeptide	+	172734574	173961558
ASHG19A3A055217	1512.97	1538.87	1429.62	1482.3	1497.55	1554.42	1558.56	10.4203	10.449	10.3998	10.634	10.6802	10.7043	10.6454	P	P	P	P	P	P	P	noncoding	uc003njq.2	FKSG62	UCSC_knowngene	588	chr6	+	27793689	27794715	CCTCCCAGACGGGGCCGTGGCCGGGCAGAGGGGCTCCTCACTTCCCAGTAGGGGCGGCCG	intergenic
ASHG19A3A035243	97.0042	65.461	86.0169	23.5326	46.3691	31.9346	45.5613	6.71731	6.17071	6.58519	4.35184	5.45387	4.87165	5.29403	P	P	P	P	P	P	P	noncoding	ENST00000291129	AC099548.6	Ensembl	2421	chr7	+	143497824	143515066	AACTTGGAAAAGAGCTGTCTGGCAAAGTTGAGAGTTGATGGTGCAGCCTTCCTACAGATT	intergenic
ASHG19A3A037858	279.263	244.98	267.861	24.2759	19.3827	19.4767	29.5487	8.1368	7.96378	8.12031	4.39916	4.1499	4.1194	4.63793	P	P	P	P	P	P	P	noncoding	ENST00000415694	RP11-417L14.1	Ensembl	1580	chr9	-	109931849	109933429	AGCTTAATTAAGTATTTCTCTGTAGAGGAAGAGGAAGATGAAAACATGGTGCCAGAAACT	intergenic
ASHG19A3A014203	1553.31	1418.42	1465.85	384.213	624.352	385.229	727.969	10.4555	10.3368	10.4334	8.57004	9.37648	8.60129	9.49448	P	P	P	P	M	M	M	noncoding	NR_015395	LOC541471	RefSeq_NR	809	chr2	-	112124590	112252692	TTATAAATCTTCAATACATCCTGTCCCCCTAAAACGGCATCTGGGTCTTTTGAGGGTTAA	intergenic
ASHG19A3A050736	38.778	29.6175	35.6752	40.5345	54.5791	45.5194	62.2995	5.42595	5.11025	5.36188	5.1738	5.69858	5.40461	5.76488	P	P	P	P	P	P	P	noncoding	ENST00000446249	RP11-439A17.4	Ensembl	664	chr1	-	120876262	120905153	TCAGGCTTTTCATTATTATAGGAAGCATCTGGCCAAGGACCACCAACATCTTCCTGTCCT	intergenic
ASHG19A3L0002896	73.9763	72.0296	60.2908	67.9305	72.3326	69.6115	93.5976	6.34255	6.30054	6.08664	5.95209	6.11691	6.04223	6.37061	P	P	P	P	P	P	P	noncoding	chr2:105731762-105737443+	lincRNA-GPR45	lincRNA	5682	chr2	+	105731762	105737443	GGACAAACTTGTTTATTTGTTGACTCAATCATTCACACATTCTCCAGCCATTTACTCTTT	intergenic
ASHG19A3A031526	59.582	54.313	54.6886	41.1632	74.222	47.5563	84.6316	6.02814	5.91485	5.95264	5.19949	6.15843	5.46958	6.22473	P	P	P	P	M	M	P	noncoding	BC019949		misc_RNA	2413	chr1	-	24073204	24075608	TTGCAAGGTACATGTTGAGGCATCTCAGTTGTCCCCTGTACAATCCTTCAACCCAAAAAA	natural antisense	NM_003198	TCEB3	transcription elongation factor B polypeptide 3	+	24069855	24088549
ASHG19A3A008205	99.3095	89.0413	76.4796	31.4765	42.5407	30.3798	43.2094	6.7517	6.59267	6.41491	4.79976	5.3221	4.79851	5.21761	P	P	P	P	P	P	P	noncoding	uc010ctx.1	AK125932	UCSC_knowngene	4399	chr17	-	34220710	34236953	TAAATACCCCTGGAAATGATGAACTTCCGCCAAATCTATCAAGAGCCCATGACTCCATCT	intergenic
ASHG19A3A039624	47.479	41.1916	41.5772	28.1391	32.5245	25.0694	43.48	5.71134	5.54949	5.57575	4.62688	4.92131	4.50808	5.22611	P	P	P	P	P	P	P	noncoding	ENST00000416056	RP11-565J7.1	Ensembl	388	chr1	+	212109590	212109978	GATGGGTAAGCCTGTGTTTACAGATCCTTCCATAAAGACAAAATCTGGATATCATATTAT	intergenic
ASHG19A3A021759	65.6604	59.3761	64.8877	45.4302	61.6291	43.3835	71.4154	6.16653	6.03606	6.18613	5.34932	5.88428	5.33098	5.96677	P	P	P	P	P	P	P	noncoding	AL833482		misc_RNA	4750	chr3	-	150103933	150108669	GTTTTATAAGACGCATGTCCTCCACTGCACAGCTGTATTCTATGACCAACCACAGAACAC	intergenic
ASHG19A3A027674	290.147	265.863	262.569	1033.31	1091.55	1058.43	1107.74	8.19293	8.07275	8.09345	10.0897	10.2058	10.1454	10.1369	P	P	P	P	P	P	P	noncoding	BC062365		misc_RNA	1461	chr5	-	168088744	168090184	AAGTCTGATGCTTCAAAAAGATGAGAAGAAGGGCAAGAAGAGGGATAACTCCCAAGCTCA	intergenic
ASHG19A3L0002034	25.4877	23.307	29.2937	34.5038	56.5551	35.2697	48.575	4.84224	4.79747	5.09478	4.93405	5.75249	5.01919	5.39091	A	P	P	P	P	P	P	noncoding	DB302442	lincRNA-TSNARE1-4	lincRNA	536	chr8	+	143085513	143086049	TTGTAACCACAAAGCTCAGGAGCCACATGCATGCCCAGCACCAGGAGGAAGCCAGTCAAG	intergenic
ASHG19A3A035844	364.506	312.467	369.316	116.419	243.253	113.296	257.295	8.5112	8.29028	8.57265	6.75041	7.94857	6.75294	7.91341	P	P	P	P	P	M	P	noncoding	ENST00000489168	RP11-159C14.1	Ensembl	390	chr8	-	69437751	69438141	TATCATCCTGTTTCTCACTGTGATGAAGCATGGCTACACTGGTGAATCTAAAATCATTGA	intronic antisense	NM_001195639	C8orf34	hypothetical protein LOC116328 isoform 2	+	69242956	69448062
ASHG19A3A035844	364.506	312.467	369.316	116.419	243.253	113.296	257.295	8.5112	8.29028	8.57265	6.75041	7.94857	6.75294	7.91341	P	P	P	P	P	M	P	noncoding	ENST00000489168	RP11-159C14.1	Ensembl	390	chr8	-	69437751	69438141	TATCATCCTGTTTCTCACTGTGATGAAGCATGGCTACACTGGTGAATCTAAAATCATTGA	intronic antisense	NM_052958	C8orf34	hypothetical protein LOC116328 isoform 1	+	69242956	69731258
ASHG19A3A055306	304.428	307.437	271.629	206.891	217.927	209.142	208.485	8.26385	8.26785	8.14204	7.62296	7.77718	7.6827	7.58989	P	P	P	P	P	M	P	noncoding	uc010ury.1	DKFZp434I1020	UCSC_knowngene	3075	chr15	-	100330989	100347132	GCTGCGGCTCCTGGTTCTTGTGGAAGGACAGCAAGGCTGAGGAGAATGGCTCCCACAGCT	intergenic
ASHG19A3A008585	33.9202	32.3123	34.5074	34.1346	46.3963	37.7757	54.7314	5.24366	5.22834	5.31289	4.91706	5.45505	5.12388	5.57094	P	P	P	P	M	M	P	noncoding	G43341		misc_RNA	150	chr17	-	49248955	49249105	AGAATGATCAATCCTGTTGCCTCTAAGTCAATGGAATGAAGAGCTGTGTCCAGGGACACA	natural antisense	NM_001018136	NME1-NME2	NME1-NME2 protein	+	49230896	49249105
ASHG19A3A008585	33.9202	32.3123	34.5074	34.1346	46.3963	37.7757	54.7314	5.24366	5.22834	5.31289	4.91706	5.45505	5.12388	5.57094	P	P	P	P	M	M	P	noncoding	G43341		misc_RNA	150	chr17	-	49248955	49249105	AGAATGATCAATCCTGTTGCCTCTAAGTCAATGGAATGAAGAGCTGTGTCCAGGGACACA	natural antisense	NM_001198682	NME2	nucleoside diphosphate kinase B isoform b	+	49243632	49249105
ASHG19A3A008585	33.9202	32.3123	34.5074	34.1346	46.3963	37.7757	54.7314	5.24366	5.22834	5.31289	4.91706	5.45505	5.12388	5.57094	P	P	P	P	M	M	P	noncoding	G43341		misc_RNA	150	chr17	-	49248955	49249105	AGAATGATCAATCCTGTTGCCTCTAAGTCAATGGAATGAAGAGCTGTGTCCAGGGACACA	natural antisense	NM_001018138	NME2	nucleoside diphosphate kinase B isoform a	+	49244082	49249105
ASHG19A3A008585	33.9202	32.3123	34.5074	34.1346	46.3963	37.7757	54.7314	5.24366	5.22834	5.31289	4.91706	5.45505	5.12388	5.57094	P	P	P	P	M	M	P	noncoding	G43341		misc_RNA	150	chr17	-	49248955	49249105	AGAATGATCAATCCTGTTGCCTCTAAGTCAATGGAATGAAGAGCTGTGTCCAGGGACACA	natural antisense	NM_001018137	NME2	nucleoside diphosphate kinase B isoform a	+	49242795	49249105
ASHG19A3A008585	33.9202	32.3123	34.5074	34.1346	46.3963	37.7757	54.7314	5.24366	5.22834	5.31289	4.91706	5.45505	5.12388	5.57094	P	P	P	P	M	M	P	noncoding	G43341		misc_RNA	150	chr17	-	49248955	49249105	AGAATGATCAATCCTGTTGCCTCTAAGTCAATGGAATGAAGAGCTGTGTCCAGGGACACA	natural antisense	NM_002512	NME2	nucleoside diphosphate kinase B isoform a	+	49243632	49249105
ASHG19A3A008585	33.9202	32.3123	34.5074	34.1346	46.3963	37.7757	54.7314	5.24366	5.22834	5.31289	4.91706	5.45505	5.12388	5.57094	P	P	P	P	M	M	P	noncoding	G43341		misc_RNA	150	chr17	-	49248955	49249105	AGAATGATCAATCCTGTTGCCTCTAAGTCAATGGAATGAAGAGCTGTGTCCAGGGACACA	natural antisense	NM_001018139	NME2	nucleoside diphosphate kinase B isoform a	+	49243861	49249105
ASHG19A3A030527	121.888	75.6516	121.822	50.6459	445.754	63.1929	497.687	7.02576	6.36791	7.05663	5.51714	8.86204	5.89515	8.91604	P	P	P	P	M	P	P	noncoding	ENST00000401879	RP5-988G15.1	Ensembl	645	chr6	-	132101807	132102452	GCCGTTACCGCGAATACAAGTAAAGTTTGTACAATTCATACCTAATAAACAATTTAGGAC	intergenic
ASHG19A3A050568	135.474	130.039	125.63	22.4904	22.5808	18.6069	24.4908	7.16869	7.11062	7.0977	4.28178	4.37268	4.04938	4.34964	P	P	P	P	P	P	P	noncoding	uc001vzu.1	AK092333	UCSC_knowngene	4275	chr14	-	21668239	21672514	GTAATCAGTAATCTCATGCCAAGGATGAGAGAGGGGCATTATCCAAAAAGTTGGGTGTGT	intergenic
ASHG19A3A019319	480.204	474.135	488.345	237.346	391.373	185.272	464.237	8.87596	8.85721	8.93577	7.83683	8.65381	7.50068	8.80358	P	P	P	P	P	P	P	noncoding	ENST00000436359	AP001048.4	Ensembl	280	chr21	+	44885188	44887178	GGACATCAGGCTGGCAGATTGGAGCACACCCCTTCTTTCTAACCCCTCTTGAAAGCTTCC	intergenic
ASHG19A3A026383	256.137	268.73	229.732	1642.34	1761.52	1704.78	1819.68	8.02829	8.08814	7.90805	10.7763	10.9059	10.8344	10.8643	P	P	P	P	P	P	P	noncoding	uc003ixr.2	CR595267	UCSC_knowngene	1013	chr4	+	186346920	186348033	ACCTCTCCTGACGCTCCATCCGTACCTTTTGCAAGGGAACGTGCCATAATTCGGCTATGC	natural antisense	NM_018359	UFSP2	ufm1-specific protease 2	-	186320693	186347139
ASHG19A3A007318	104.865	96.1389	115.636	112.006	189.491	137.869	213.117	6.82119	6.70101	6.98442	6.69734	7.56577	7.05178	7.62031	P	P	P	P	P	M	P	noncoding	NR_024503	ASFMR1	RefSeq_NR	2380	chrX	-	146990948	147003676	GGCCAGAACGCCCATTTCTGCAGAGCTGCCTTAATCCATGTTCCCTTCGGGATGCTGGTA	natural antisense	NM_001185075	FMR1	fragile X mental retardation 1 protein isoform	+	146993468	147032647
ASHG19A3A007318	104.865	96.1389	115.636	112.006	189.491	137.869	213.117	6.82119	6.70101	6.98442	6.69734	7.56577	7.05178	7.62031	P	P	P	P	P	M	P	noncoding	NR_024503	ASFMR1	RefSeq_NR	2380	chrX	-	146990948	147003676	GGCCAGAACGCCCATTTCTGCAGAGCTGCCTTAATCCATGTTCCCTTCGGGATGCTGGTA	natural antisense	NM_002024	FMR1	fragile X mental retardation 1 protein isoform	+	146993468	147032647
ASHG19A3A007318	104.865	96.1389	115.636	112.006	189.491	137.869	213.117	6.82119	6.70101	6.98442	6.69734	7.56577	7.05178	7.62031	P	P	P	P	P	M	P	noncoding	NR_024503	ASFMR1	RefSeq_NR	2380	chrX	-	146990948	147003676	GGCCAGAACGCCCATTTCTGCAGAGCTGCCTTAATCCATGTTCCCTTCGGGATGCTGGTA	natural antisense	NM_001185076	FMR1	fragile X mental retardation 1 protein isoform	+	146993468	147032647
ASHG19A3A007318	104.865	96.1389	115.636	112.006	189.491	137.869	213.117	6.82119	6.70101	6.98442	6.69734	7.56577	7.05178	7.62031	P	P	P	P	P	M	P	noncoding	NR_024503	ASFMR1	RefSeq_NR	2380	chrX	-	146990948	147003676	GGCCAGAACGCCCATTTCTGCAGAGCTGCCTTAATCCATGTTCCCTTCGGGATGCTGGTA	natural antisense	NM_001185082	FMR1	fragile X mental retardation 1 protein isoform	+	146993468	147032647
ASHG19A3A007318	104.865	96.1389	115.636	112.006	189.491	137.869	213.117	6.82119	6.70101	6.98442	6.69734	7.56577	7.05178	7.62031	P	P	P	P	P	M	P	noncoding	NR_024503	ASFMR1	RefSeq_NR	2380	chrX	-	146990948	147003676	GGCCAGAACGCCCATTTCTGCAGAGCTGCCTTAATCCATGTTCCCTTCGGGATGCTGGTA	natural antisense	NM_001185081	FMR1	fragile X mental retardation 1 protein isoform	+	146993468	147032647
ASHG19A3A028444	4307.23	3848.5	4283.72	1563.99	3270.92	2238.59	3514.7	11.9078	11.7476	11.9717	10.7047	11.8178	11.2393	11.8297	P	P	P	P	P	P	P	noncoding	BC142990		NRED	2185	chr5	+	79783804	79837842	GGTGAGTGTTCTCCCCTCCAGTATCCATCTCCAAAATTCATAGCCTCCCATTATGATATT	exon sense-overlapping	NM_205548	FAM151B	hypothetical protein LOC167555	+	79783799	79838382
ASHG19A3A045142	1103.91	1209.18	1090.6	740.231	771.746	777.891	811.01	9.98956	10.1222	10.0292	9.5805	9.69056	9.67408	9.6572	P	P	P	P	P	M	M	noncoding	ENST00000413181	AC135977.1	Ensembl	966	chr11	-	49455024	49455990	AGAACAGAAAGTGAGGGGCTTTAAGCAGGTGAATACACTCCAGTGTGCTCGTTACGTTTA	intergenic
ASHG19A3A000380	266.781	301.637	244.444	793.551	691.032	678.645	772.681	8.0778	8.23958	7.99331	9.6898	9.53346	9.46725	9.58505	P	P	P	P	M	P	M	noncoding	ENST00000462717	RP11-245J9.4	Ensembl	441	chr3	+	63997639	64001922	AAACCTTGGGATACCAGCCTTCCATTTTGTGCATATAATAAACGAGTAAAAGGCCGGGCG	intronic antisense	NM_014814	PSMD6	26S proteasome non-ATPase regulatory subunit 6	-	63996230	64009120
ASHG19A3A043559	1695.81	2005.2	1647.21	833.525	901.983	947.186	994.903	10.5762	10.8334	10.6031	9.77058	9.93089	9.97093	9.97538	P	P	P	P	P	P	P	noncoding	CR592477		misc_RNA	2305	chr10	+	6019376	6021681	CCTACTGCCTCATCCTGTCAAAACTTAATATGTCTGCTCAATGTTTGCTTCAGATATTTT	natural antisense	NM_002189	IL15RA	interleukin-15 receptor subunit alpha isoform 1	-	5994333	6019574
ASHG19A3A043559	1695.81	2005.2	1647.21	833.525	901.983	947.186	994.903	10.5762	10.8334	10.6031	9.77058	9.93089	9.97093	9.97538	P	P	P	P	P	P	P	noncoding	CR592477		misc_RNA	2305	chr10	+	6019376	6021681	CCTACTGCCTCATCCTGTCAAAACTTAATATGTCTGCTCAATGTTTGCTTCAGATATTTT	natural antisense	NM_172200	IL15RA	interleukin-15 receptor subunit alpha isoform 2	-	5994333	6019574
ASHG19A3A012226	256.399	343.234	272.123	303.58	379.239	409.625	391.075	8.0297	8.42317	8.14462	8.21178	8.60883	8.69671	8.53978	P	P	P	P	P	P	P	noncoding	M28219		NRED	282	chr19	+	11234004	11242821	TTGGTCACGAGATGGAGTCCAGGTGTCGTCCTCACTCCCTTGCTGACCTTCTCTCACTTG	exon sense-overlapping	NM_001195803	LDLR	low-density lipoprotein receptor isoform 6	+	11200037	11244505
ASHG19A3A012226	256.399	343.234	272.123	303.58	379.239	409.625	391.075	8.0297	8.42317	8.14462	8.21178	8.60883	8.69671	8.53978	P	P	P	P	P	P	P	noncoding	M28219		NRED	282	chr19	+	11234004	11242821	TTGGTCACGAGATGGAGTCCAGGTGTCGTCCTCACTCCCTTGCTGACCTTCTCTCACTTG	exon sense-overlapping	NM_001195800	LDLR	low-density lipoprotein receptor isoform 4	+	11200037	11244505
ASHG19A3A012226	256.399	343.234	272.123	303.58	379.239	409.625	391.075	8.0297	8.42317	8.14462	8.21178	8.60883	8.69671	8.53978	P	P	P	P	P	P	P	noncoding	M28219		NRED	282	chr19	+	11234004	11242821	TTGGTCACGAGATGGAGTCCAGGTGTCGTCCTCACTCCCTTGCTGACCTTCTCTCACTTG	exon sense-overlapping	NM_000527	LDLR	low-density lipoprotein receptor isoform 1	+	11200037	11244505
ASHG19A3A012226	256.399	343.234	272.123	303.58	379.239	409.625	391.075	8.0297	8.42317	8.14462	8.21178	8.60883	8.69671	8.53978	P	P	P	P	P	P	P	noncoding	M28219		NRED	282	chr19	+	11234004	11242821	TTGGTCACGAGATGGAGTCCAGGTGTCGTCCTCACTCCCTTGCTGACCTTCTCTCACTTG	exon sense-overlapping	NM_001195799	LDLR	low-density lipoprotein receptor isoform 3	+	11200037	11244505
ASHG19A3A012226	256.399	343.234	272.123	303.58	379.239	409.625	391.075	8.0297	8.42317	8.14462	8.21178	8.60883	8.69671	8.53978	P	P	P	P	P	P	P	noncoding	M28219		NRED	282	chr19	+	11234004	11242821	TTGGTCACGAGATGGAGTCCAGGTGTCGTCCTCACTCCCTTGCTGACCTTCTCTCACTTG	exon sense-overlapping	NM_001195802	LDLR	low-density lipoprotein receptor isoform 5	+	11200037	11244505
ASHG19A3A012226	256.399	343.234	272.123	303.58	379.239	409.625	391.075	8.0297	8.42317	8.14462	8.21178	8.60883	8.69671	8.53978	P	P	P	P	P	P	P	noncoding	M28219		NRED	282	chr19	+	11234004	11242821	TTGGTCACGAGATGGAGTCCAGGTGTCGTCCTCACTCCCTTGCTGACCTTCTCTCACTTG	exon sense-overlapping	NM_001195798	LDLR	low-density lipoprotein receptor isoform 2	+	11200037	11244505
ASHG19A3A025599	12.958	10.6337	6.01914	24.3466	16.0451	13.8696	22.3034	3.87648	3.84037	2.9855	4.4034	3.84755	3.57236	4.19865	A	A	A	P	P	P	P	noncoding	ENST00000505798	RP11-642E20.1	Ensembl	468	chr4	+	69048030	69048498	AACCACTTCCTAGGCCGCGAACGGAAACTCATGCTGACCAGACTCAGCAGGCTGGAGGGG	intergenic
ASHG19A3A027263	116.835	127.964	111.097	216.244	253.557	257.998	257.207	6.96792	7.08932	6.93324	7.68809	8.01952	8.00119	7.9127	P	P	P	P	P	P	P	noncoding	AB002441		misc_RNA	561	chr5	-	115363741	115364181	TTAACAGTCTGGAGAGACCAGCCTACATGCTCTTTTGGCAAGATCAGTAGTTCTTGGCAT	intergenic
ASHG19A3A007732	176.929	226.472	188.056	88.5374	97.9441	94.6256	100.549	7.53153	7.8592	7.64903	6.358	6.56767	6.48761	6.47534	P	P	P	P	P	P	P	noncoding	NR_033195	ZFAND1	RefSeq_NR	2148	chr8	-	82613567	82633539	AGTTGGACATCGGGCAGCACTGCCAGATTTTCTTCCATTTGTGTGTGATGATTGTTCAGG	exon sense-overlapping	NM_001170797	ZFAND1	AN1-type zinc finger protein 1 isoform c	-	82615148	82633539
ASHG19A3A007732	176.929	226.472	188.056	88.5374	97.9441	94.6256	100.549	7.53153	7.8592	7.64903	6.358	6.56767	6.48761	6.47534	P	P	P	P	P	P	P	noncoding	NR_033195	ZFAND1	RefSeq_NR	2148	chr8	-	82613567	82633539	AGTTGGACATCGGGCAGCACTGCCAGATTTTCTTCCATTTGTGTGTGATGATTGTTCAGG	exon sense-overlapping	NM_024699	ZFAND1	AN1-type zinc finger protein 1 isoform a	-	82613565	82633539
ASHG19A3A007732	176.929	226.472	188.056	88.5374	97.9441	94.6256	100.549	7.53153	7.8592	7.64903	6.358	6.56767	6.48761	6.47534	P	P	P	P	P	P	P	noncoding	NR_033195	ZFAND1	RefSeq_NR	2148	chr8	-	82613567	82633539	AGTTGGACATCGGGCAGCACTGCCAGATTTTCTTCCATTTGTGTGTGATGATTGTTCAGG	exon sense-overlapping	NM_001170796	ZFAND1	AN1-type zinc finger protein 1 isoform b	-	82613565	82633539
ASHG19A3A012966	65718.3	76615.8	54131.3	49467.1	36476	52520.5	54653.7	15.721	16.0072	15.5418	15.8163	15.3301	15.856	15.8485	P	P	P	P	P	P	P	noncoding	ENST00000477141	CTD-3099C6.4	Ensembl	156	chr19	+	53067328	53067484	AATAAAATCAGGTCCAACTTTAAAAGGAGACATTGGAGAAGAACCAAGCTGGGTCTATAA	intergenic
ASHG19A3A000365	44.0015	45.0889	30.0878	23.5508	46.6058	35.4678	40.8948	5.60381	5.67169	5.13135	4.35274	5.46257	5.02832	5.13443	P	P	P	P	P	P	P	noncoding	ENST00000456100	AL163953.3	Ensembl	562	chr14	+	53684429	54153976	AGCATGTTGTCACCTCTCAATACATAAAACTACTGGAGGGTGGTTCCAAGATGGCCAAAT	intergenic
ASHG19A3A052327	235.255	330.815	180.552	141.75	328.904	237.26	302.622	7.91835	8.37095	7.59487	7.05147	8.40068	7.8757	8.15787	P	P	P	P	P	P	P	noncoding	AK127294		misc_RNA	4073	chr15	-	70598856	70602887	ATGGTGGAGAGTACAGGGAAATAGATTTGACTAGATAGGAGGAGGTTCATTCCCTCCCAA	intergenic
ASHG19A3A032354	97.165	124.342	85.0631	59.1299	239.58	69.4939	69.213	6.71996	7.04863	6.56908	5.74424	7.92392	6.03885	5.92409	P	P	P	M	M	M	M	noncoding	ENST00000420557	C6orf208	Ensembl	2318	chr6	+	170190416	170202969	ATGCATGTTGCCCACATAGCTCAGCAACAGATGCTCTCACGCTTGTTAAAAGTAAAACCG	intergenic
ASHG19A3A024870	142050	87401.2	109995	95022	95287.9	69078.5	88212.5	16.8359	16.1845	16.579	16.7844	16.7096	16.2368	16.5537	P	P	P	P	M	M	M	noncoding	NR_001562	ANXA2P1	RefSeq_NR	1343	chr4	-	154228620	154229963	GAAACACTTTGCCTCCTGTGTACTGTGTCATAAACGGATTAATAAACTGAATTTGTACTT	intronic antisense	NM_001130067	TRIM2	tripartite motif-containing protein 2 isoform 2	+	154074269	154260474
ASHG19A3A024870	142050	87401.2	109995	95022	95287.9	69078.5	88212.5	16.8359	16.1845	16.579	16.7844	16.7096	16.2368	16.5537	P	P	P	P	M	M	M	noncoding	NR_001562	ANXA2P1	RefSeq_NR	1343	chr4	-	154228620	154229963	GAAACACTTTGCCTCCTGTGTACTGTGTCATAAACGGATTAATAAACTGAATTTGTACTT	intronic antisense	NM_015271	TRIM2	tripartite motif-containing protein 2 isoform 1	+	154125597	154260474
ASHG19A3A048268	287.51	129.655	170.238	70.7091	106.266	45.4679	93.5922	8.17875	7.10528	7.51212	6.01465	6.69253	5.40236	6.37044	P	P	P	P	P	P	P	noncoding	uc001qoa.2	SRP14P1	UCSC_knowngene	331	chr12	+	6547666	6547997	TATTCAAACCTACTGAGAGCTAACATGGACGGGCTGAGAAGAGGGACAAAAAGAGCAAAA	intergenic
CUST_739_PI426073487	36.1261	23.4603	22.1817	50.8639	31.6944	49.8975	49.0128	5.32993	4.80649	4.7051	5.52428	4.88114	5.5388	5.40285	A	P	P	P	P	P	P	noncoding	uc.260-	uc.260	UCR	231	chr9	-	81472423	81472654	TTCATTTTTCTCTATCTTCCAGCCATCCAGCTGGCATCTATAATGGATATCCTGGGGGCT	intergenic
ASHG19A3A027720	168.65	153.917	128.275	135.909	147.69	142.051	129.404	7.46891	7.3377	7.12834	6.98618	7.19112	7.09562	6.85987	P	P	P	P	P	P	P	noncoding	ENST00000515403	RP11-844P9.2	Ensembl	3632	chr5	-	175570087	175612158	CCTGCCTGTTATGAGGGACAGGTAGGAGAGGATGGGCTTTCCATCAAAACAAACAAAAAA	intergenic
ASHG19A3A053815	32.6872	25.4582	28.8419	40.4071	12.157	27.594	23.5547	5.18619	4.90861	5.07238	5.16912	3.39855	4.6511	4.28538	A	P	P	P	A	P	P	noncoding	AL110259		misc_RNA	767	chr16	-	65175658	65210476	TTTTCACTTGGTCTAAAGCAAAAGGCCCCAGGCTTTCTGTCAGGAGCTGCAACTTTTCAT	intergenic
CUST_12_PI426265844	44.2975	31.7965	37.4032	63.6452	15.5913	15.1963	7.28912	5.61345	5.20564	5.43139	5.856	3.80555	3.72347	2.58254	P	P	P	A	P	P	P	noncoding	EF470865	LUST	lncRNAdb	1386	chr3	-	50137035	50138421	CTTTTGCCACACACTATTCCCCATGGAATAGGAATTACATCAACTGTTTAATTAGCCAAG	natural antisense	NM_005778	RBM5	RNA-binding protein 5	+	50126351	50156392
ASHG19A3A014963	40.8121	31.3309	28.9187	9.90962	20.8235	13.3715	22.8617	5.49346	5.18619	5.07676	3.01352	4.2557	3.51416	4.23784	P	P	P	P	P	A	A	noncoding	uc001amm.2	C1orf211	UCSC_knowngene	1248	chr1	+	6297870	6299490	AAAGGAGAGGAAGCAGATCTAAGCACACATGGGCATCAAACCAGAGGAACAAAGTCACAT	intergenic
ASHG19A3A028385	2030.05	1916.93	1777.53	582.69	867.587	899.092	916.594	10.848	10.769	10.7162	9.21631	9.86729	9.88685	9.85371	P	P	P	P	P	P	P	noncoding	ENST00000511688	CTD-2060C23.1	Ensembl	1107	chr5	+	74094818	74095925	TCGATGGAGAGCCATGACAATTTGGGATTTCAAGGATAATTTGAAGCTGAGTGAGCCTCC	intronic antisense	NM_015566	FAM169A	hypothetical protein LOC26049	-	74073398	74162615
ASHG19A3A020915	104.225	108.41	121.301	289.545	106.542	69.3967	97.6705	6.81474	6.86035	7.05121	8.13963	6.69633	6.03574	6.43268	P	P	P	P	P	P	P	noncoding	BC040602		misc_RNA	2182	chr3	-	40496576	40498720	TTCATGGCTAGGTCTGTTCGCTCCTCACGTTCTCTCCTAATCTCAGTAACTTTGTTAACC	bidirectional	NM_001034996	RPL14	60S ribosomal protein L14	+	40498829	40503859
ASHG19A3A020915	104.225	108.41	121.301	289.545	106.542	69.3967	97.6705	6.81474	6.86035	7.05121	8.13963	6.69633	6.03574	6.43268	P	P	P	P	P	P	P	noncoding	BC040602		misc_RNA	2182	chr3	-	40496576	40498720	TTCATGGCTAGGTCTGTTCGCTCCTCACGTTCTCTCCTAATCTCAGTAACTTTGTTAACC	bidirectional	NM_003973	RPL14	60S ribosomal protein L14	+	40498800	40503859
ASHG19A3A040894	25.2366	30.622	29.4714	93.171	56.5373	37.8246	43.1326	4.82712	5.15419	5.10218	6.43285	5.75209	5.12596	5.21437	P	P	P	P	P	P	P	noncoding	ENST00000447169	RP5-1158E12.2	Ensembl	754	chrX	+	45772552	45773306	AATCTATGCCCAAATCTGATCTGGGCTCCTGTTCTTGTTCTCAAAGCAGATCTAAGGATG	intergenic
ASHG19A3A044410	88.8324	85.9987	81.7101	117.533	58.1809	30.2799	28.7519	6.59056	6.54053	6.51136	6.76726	5.79755	4.79349	4.59518	P	P	P	P	P	P	P	noncoding	ENST00000412353	RP11-190J1.10	Ensembl	850	chr10	+	103578834	103588536	AGTAAATCTGCTTGAAGTTCTCCTCATTGACAATTCCGCTGGGACATTCCTGGAAGGAGA	natural antisense	NM_173194	KCNIP2	Kv channel-interacting protein 2 isoform 5	-	103585730	103599611
ASHG19A3A044410	88.8324	85.9987	81.7101	117.533	58.1809	30.2799	28.7519	6.59056	6.54053	6.51136	6.76726	5.79755	4.79349	4.59518	P	P	P	P	P	P	P	noncoding	ENST00000412353	RP11-190J1.10	Ensembl	850	chr10	+	103578834	103588536	AGTAAATCTGCTTGAAGTTCTCCTCATTGACAATTCCGCTGGGACATTCCTGGAAGGAGA	bidirectional	NM_012215	MGEA5	bifunctional protein NCOAT isoform a	-	103544199	103578222
ASHG19A3A044410	88.8324	85.9987	81.7101	117.533	58.1809	30.2799	28.7519	6.59056	6.54053	6.51136	6.76726	5.79755	4.79349	4.59518	P	P	P	P	P	P	P	noncoding	ENST00000412353	RP11-190J1.10	Ensembl	850	chr10	+	103578834	103588536	AGTAAATCTGCTTGAAGTTCTCCTCATTGACAATTCCGCTGGGACATTCCTGGAAGGAGA	bidirectional	NM_001142434	MGEA5	bifunctional protein NCOAT isoform b	-	103544199	103578222
ASHG19A3A044410	88.8324	85.9987	81.7101	117.533	58.1809	30.2799	28.7519	6.59056	6.54053	6.51136	6.76726	5.79755	4.79349	4.59518	P	P	P	P	P	P	P	noncoding	ENST00000412353	RP11-190J1.10	Ensembl	850	chr10	+	103578834	103588536	AGTAAATCTGCTTGAAGTTCTCCTCATTGACAATTCCGCTGGGACATTCCTGGAAGGAGA	natural antisense	NM_173197	KCNIP2	Kv channel-interacting protein 2 isoform 7	-	103587397	103603677
ASHG19A3A044410	88.8324	85.9987	81.7101	117.533	58.1809	30.2799	28.7519	6.59056	6.54053	6.51136	6.76726	5.79755	4.79349	4.59518	P	P	P	P	P	P	P	noncoding	ENST00000412353	RP11-190J1.10	Ensembl	850	chr10	+	103578834	103588536	AGTAAATCTGCTTGAAGTTCTCCTCATTGACAATTCCGCTGGGACATTCCTGGAAGGAGA	natural antisense	NM_014591	KCNIP2	Kv channel-interacting protein 2 isoform 1	-	103585730	103603677
ASHG19A3A044410	88.8324	85.9987	81.7101	117.533	58.1809	30.2799	28.7519	6.59056	6.54053	6.51136	6.76726	5.79755	4.79349	4.59518	P	P	P	P	P	P	P	noncoding	ENST00000412353	RP11-190J1.10	Ensembl	850	chr10	+	103578834	103588536	AGTAAATCTGCTTGAAGTTCTCCTCATTGACAATTCCGCTGGGACATTCCTGGAAGGAGA	natural antisense	NM_173191	KCNIP2	Kv channel-interacting protein 2 isoform 2	-	103585730	103603677
ASHG19A3A044410	88.8324	85.9987	81.7101	117.533	58.1809	30.2799	28.7519	6.59056	6.54053	6.51136	6.76726	5.79755	4.79349	4.59518	P	P	P	P	P	P	P	noncoding	ENST00000412353	RP11-190J1.10	Ensembl	850	chr10	+	103578834	103588536	AGTAAATCTGCTTGAAGTTCTCCTCATTGACAATTCCGCTGGGACATTCCTGGAAGGAGA	natural antisense	NM_173193	KCNIP2	Kv channel-interacting protein 2 isoform 4	-	103585730	103603677
ASHG19A3A044410	88.8324	85.9987	81.7101	117.533	58.1809	30.2799	28.7519	6.59056	6.54053	6.51136	6.76726	5.79755	4.79349	4.59518	P	P	P	P	P	P	P	noncoding	ENST00000412353	RP11-190J1.10	Ensembl	850	chr10	+	103578834	103588536	AGTAAATCTGCTTGAAGTTCTCCTCATTGACAATTCCGCTGGGACATTCCTGGAAGGAGA	natural antisense	NM_173195	KCNIP2	Kv channel-interacting protein 2 isoform 6	-	103585730	103603677
ASHG19A3A044410	88.8324	85.9987	81.7101	117.533	58.1809	30.2799	28.7519	6.59056	6.54053	6.51136	6.76726	5.79755	4.79349	4.59518	P	P	P	P	P	P	P	noncoding	ENST00000412353	RP11-190J1.10	Ensembl	850	chr10	+	103578834	103588536	AGTAAATCTGCTTGAAGTTCTCCTCATTGACAATTCCGCTGGGACATTCCTGGAAGGAGA	natural antisense	NM_173192	KCNIP2	Kv channel-interacting protein 2 isoform 3	-	103585730	103603677
ASHG19A3A027851	13.3066	12.7343	17.9038	31.6217	28.9323	22.458	32.2344	3.91227	4.05503	4.40982	4.80642	4.7496	4.34061	4.7712	A	A	P	P	P	P	P	noncoding	ENST00000507989	RP11-661C8.2	Ensembl	559	chr5	+	946429	956635	AAATAACAAGAGCTGGCGGATGCAGCCTCACCTCGCTAGAGCCAGGCATTGTTCTGCACC	intergenic
ASHG19A3A040079	142.18	119.076	125.338	181.714	129.994	133.845	127.956	7.23524	6.98753	7.09562	7.43479	6.99881	7.00917	6.84344	P	P	P	P	P	M	M	noncoding	NR_028379	NCRNA00182	RefSeq_NR	2356	chrX	-	73247970	73513409	GCTTCCTTCTGTAAAATTTGGACTGTTTGTTCTTCCCATTATATTAATAGTTGCTTCAGG	intergenic
ASHG19A3A046568	313.166	321.099	254.771	409.2	181.464	145.794	133.137	8.30083	8.32888	8.05178	8.66886	7.49881	7.1375	6.90656	P	P	P	P	P	M	M	noncoding	ENST00000413292	AP001187.12	Ensembl	563	chr11	+	64685024	64691932	TGCGACTCCTTCCTGTCAGTGTCCTGGCATCACCCTACTTTCCTGGTGCAAACTCCTAAG	bidirectional	NM_015104	ATG2A	autophagy-related protein 2 homolog A	-	64662003	64684722
ASHG19A3A054279	169.924	147.624	141.614	176.93	141.421	149.695	158.038	7.47839	7.28035	7.26437	7.39144	7.12556	7.17751	7.16712	P	P	P	P	P	P	P	noncoding	BC011942		misc_RNA	487	chr16	+	9079619	9086461	AACAAAAATTCAGGCAACGTAGTGAGACTCTGTCTCCTGCGGTTGATACCTGTTCTACCT	intergenic
ASHG19A3A048407	64.7013	52.414	61.9856	95.1469	70.8827	21.1547	51.908	6.1455	5.87105	6.12691	6.46358	6.08862	4.24654	5.49083	P	P	P	P	P	P	P	noncoding	ENST00000363605	AC007535.2	Ensembl	345	chr12	+	13836475	13836820	TGTATTAGTTGTTATTATTATTACCTATTTTTTACATTGCCTGGGTGTCAGGGGAGTTAG	intronic antisense	NM_000834	GRIN2B	glutamate [NMDA] receptor subunit epsilon-2	-	13714409	14133022
ASHG19A3A018524	42.2764	41.0523	37.4252	60.343	54.7871	45.5455	53.5886	5.54602	5.54428	5.43211	5.7749	5.70455	5.40555	5.54153	P	P	P	P	P	P	P	noncoding	uc010gjw.1	AK309218	UCSC_knowngene	3684	chr20	+	58713536	59228976	GAGAAAAGACGTCCTTGCTGTGTTCCTGATATGAAGAGGAAAGCAGTCCTTCTCCATTAA	intergenic
ASHG19A3A007913	22933.1	21823.4	19062.3	17377.5	8767.86	8240.86	20020.7	14.2416	14.207	14.0551	14.263	13.2862	13.1406	14.3799	P	P	P	P	P	P	P	noncoding	BC007549		misc_RNA	1798	chr1	-	171453554	171455327	TAAATTATGAACACCTCCCTCCCCACTAATATTAATTTGAAGTAGAAAAGTCTGGACTTG	natural antisense	NM_015172	PRRC2C	protein PRRC2C	+	171454665	171562650
ASHG19A3A036232	120.411	107.416	117.765	234.667	113.957	144.409	240.698	7.01142	6.84878	7.00822	7.82023	6.79824	7.12228	7.80898	P	P	P	P	M	M	P	noncoding	ENST00000435492	RP11-317P15.3	Ensembl	259	chr1	+	182681996	182683679	AAGCTCCCACTAACACCTTACCACTCTCTACCATGTCAACTTATTTTATTATAACAATTG	intergenic
ASHG19A3A025030	529.779	505.915	446.87	852.148	835.912	837.138	868.917	9.00319	8.93971	8.81921	9.79979	9.80949	9.77907	9.76883	P	P	P	P	P	P	P	noncoding	AK096223		NRED	1807	chr4	-	177239810	177241615	AGAGATCCTTAGTTGCGTTTAAAATCTTAGTTTTTAACTTCCAGGCTGGCACAGTTTGTT	natural antisense	NM_021928	SPCS3	signal peptidase complex subunit 3	+	177241089	177253396
ASHG19A3A029557	28.0876	22.0634	24.029	9.16573	15.7265	15.3968	19.1972	4.97439	4.72657	4.81404	2.90393	3.81812	3.74474	3.95815	A	P	P	P	P	P	A	noncoding	NR_024553	ZNF204P	RefSeq_NR	2909	chr6	-	27325601	27343153	CTTGAACGTGGGGCCAAGACATCAAGAGTAGAGCAGCAGGACATTTCAAAAGAAGATTAA	intergenic
ASHG19A3A051578	53.839	38.7269	42.1159	70.1205	69.1337	62.7978	89.6096	5.888	5.46824	5.59364	6.00169	6.05593	5.88527	6.30797	P	P	P	P	P	P	P	noncoding	ENST00000444165	RP11-763B22.7	Ensembl	318	chr1	-	148853802	148854120	TGTGTCCAACGACCTCACCCAGCAGGAGATACAGACCCTGGAGGTAAGGGGTTCGGGGAC	intergenic
ASHG19A3A000058	70.1175	63.0894	75.9277	311.301	328.735	331.453	334.243	6.26457	6.12139	6.4058	8.25075	8.3992	8.37644	8.30445	P	P	P	P	P	P	P	noncoding	ENST00000332088	AL353997.4	Ensembl	839	chr17	+	18324132	18328200	TACAGCCGCTTGCTAGAGGTTGAGGACGCCCAGCTGGCCACTCAGTACTCCTTGTCCCTG	intergenic
ASHG19A3A050709	77.3067	69.6621	86.5025	68.6997	88.7195	70.5546	87.2579	6.4045	6.25641	6.5924	5.97086	6.42078	6.06258	6.26795	P	P	P	P	P	P	P	noncoding	ENST00000501776	AL162311.2	Ensembl	2867	chr14	-	36288429	36295971	TAACTGGTAGTAATGTGGAATGAAGCTGGATCCTATCTGCTCCCAAATTGGCTTGTCTCC	natural antisense	NM_032352	BRMS1L	breast cancer metastasis-suppressor 1-like	+	36295596	36341169
ASHG19A3A049461	13.1341	19.9447	12.1725	19.3988	19.9523	21.0263	24.4465	3.89443	4.60244	3.87948	4.05494	4.19199	4.23761	4.34682	A	A	A	P	P	P	P	noncoding	ENST00000434565	RP11-196I2.1	Ensembl	521	chr13	-	38624953	38717369	CATAATCTGCCTAAGATCATTGCATTTACAAGTGACGAACCCACTGCACAAATTTTGGCA	intergenic
ASHG19A3A008065	308.053	283.793	265.698	267.358	266.949	257.329	270.864	8.27877	8.16051	8.11064	8.01874	8.09381	7.99767	7.98998	P	P	P	P	P	P	P	noncoding	ENST00000428754	AC015818.5	Ensembl	107	chr17	-	20394650	20394757	GGACAAACACCTTATTCCAGCAGCTAACACTGGCAAGTCCAAGGTTTTCTATTATGAAAT	intergenic
ASHG19A3A009247	53.2273	40.6477	47.373	23.144	29.6928	29.6928	22.021	5.87283	5.53037	5.75548	4.32701	4.78574	4.76313	4.17958	P	P	P	P	P	P	P	noncoding	NR_023380	CCDC144C	RefSeq_NR	4204	chr17	+	20224486	20305504	TTCTCTCAGGGAATGATACTCTCCATGACCTGTGCCAATCACAGCTACCAGAAAACAAAG	intergenic
ASHG19A3A029342	3335.28	3169.18	3011.83	1108.01	1262.52	1311.71	1342.43	11.5473	11.4777	11.4654	10.1957	10.4244	10.4603	10.4316	P	P	P	P	P	P	P	noncoding	uc001ejz.1	AF379632	UCSC_knowngene	969	chr1	+	144162000	144167711	ATAGATGTTATTCGACTCCTTCAGGTTATCTTGAACTGCCTGACTTAGGCCAGCCCTACA	intergenic
ASHG19A3A008570	48.1522	43.5111	43.6216	49.0762	75.8794	48.5422	88.7948	5.73013	5.62129	5.64228	5.46476	6.1938	5.49949	6.29325	P	P	P	P	P	P	P	noncoding	ENST00000502300	RP11-94C24.6	Ensembl	349	chr17	-	48580772	48585689	ACACAAGGAGGGATTTTCAGAGGCTTTGGAGTACAGTGTGTGTTTGCTTCTCAACTTTGC	bidirectional	NM_032133	MYCBPAP	MYCBP-associated protein	+	48585744	48608862
ASHG19A3A043608	138.294	118.685	114.24	124.809	166.797	143.421	237.553	7.19589	6.98332	6.96805	6.8646	7.37461	7.11112	7.78994	P	P	P	P	M	P	P	noncoding	AK126099		misc_RNA	2985	chr10	+	11437806	11440791	GATCCAGCTCTGCTTCATTAATCTTTCCCTTCTAGAAATGCTTCCTCATGCACTACTTTT	intergenic
ASHG19A3A049685	48.9284	47.0633	40.2504	45.2351	40.4924	36.9785	51.8701	5.75588	5.73052	5.53023	5.34407	5.24833	5.09332	5.48932	P	P	P	P	P	P	P	noncoding	ENST00000452933	RP11-318G21.2	Ensembl	546	chr13	-	78563506	78564781	CCTTTTTCCAAACTATAGCATAAATCACAGAAAAGTATCTCCTCATTTGTTTGGGATGAG	intergenic
ASHG19A3A000510	132.979	122.373	123.017	113.379	141.963	118.973	172.692	7.14192	7.02778	7.07077	6.71519	7.13048	6.83274	7.29959	P	P	P	P	P	P	P	noncoding	ENST00000514568	AC092279.2	Ensembl	842	chr19	-	24224401	24225364	ctccacgtcctcaccagagcagctagatacagtgtggattggtgcactcacaaaccttga	intergenic
ASHG19A3A030637	28.7726	24.5436	25.5319	18.2214	33.3631	23.5012	51.8836	5.01117	4.86322	4.90046	3.96116	4.95543	4.4106	5.49012	A	P	P	P	P	P	P	noncoding	ENST00000423500	RP1-45I4.2	Ensembl	455	chr6	-	143415170	143420782	ATCTTATGGACGCCACCTCAGATTTTAGACCAGCAGATATGGGGGGACATCAATCACATA	intronic antisense	NM_016108	AIG1	androgen-induced gene 1 protein	+	143382022	143661441
ASHG19A3A055109	141.905	135.007	124.623	123.154	155.653	145.61	183.737	7.23273	7.15921	7.08908	6.84477	7.26863	7.13541	7.39398	P	P	P	P	P	P	P	noncoding	uc001vgm.1	DKFZp434F1622	UCSC_knowngene	3781	chr13	-	52741846	52865680	GATGTGAAAGTGCAAGCTTCCTCTTCAGACAAAAAATAATATCCAAAGATATTTTGGCAC	intergenic
ASHG19A3A025505	68.1299	53.315	56.5797	124.096	116.861	112.337	146.601	6.22074	5.89173	6.00102	6.85432	6.83856	6.74	7.0588	P	P	P	P	P	P	P	noncoding	ENST00000509521	RP11-241F15.4	Ensembl	1163	chr4	+	49517189	49518352	GTCACACTCTTGCCAGCAGAAGAGGCCCCTGTCATGGCCGATATTACCACCCAGTCTATC	intergenic
ASHG19A3A013526	130.404	119.948	109.293	116.563	114.819	118.1	129.131	7.11395	6.99813	6.91121	6.75294	6.80961	6.82236	6.85759	P	P	P	P	P	P	P	noncoding	NR_028386	LOC375196	RefSeq_NR	1068	chr2	-	39186430	39187485	TGGAAAACTCAACTTCTGTTCGACTTGTGGATCTTCACACTCAGAAACAAATTACGTTCC	natural antisense	NM_001145451	ARHGEF33	rho guanine nucleotide exchange factor 33	+	39146503	39202590
ASHG19A3A015138	40.6023	39.0262	30.8097	62.5836	106.259	60.8925	103.189	5.48689	5.47794	5.16297	5.83103	6.69237	5.83586	6.51831	P	P	P	P	P	P	P	noncoding	AF130098		misc_RNA	1668	chr2	-	234970685	234971785	TTCTCATTCCTGTTGTAATGGAGTTCTGTCCATTTCAACCCACCAGCTTTCCTGGCAATT	intronic antisense	NM_006944	SPP2	secreted phosphoprotein 24 precursor	+	234959345	234985776
ASHG19A3A038303	47.5206	30.4229	43.6318	44.2996	72.645	44.6204	105.515	5.71202	5.14488	5.64278	5.31236	6.12357	5.37613	6.55404	P	P	P	P	P	P	P	noncoding	ENST00000445631	RP11-91N2.3	Ensembl	206	chr9	+	2541096	2541635	CTCTGAAAGAATCCAGTTATGGGAACACAAATTACCTCATCCTCAGTTTCACTTTAAAAT	intergenic
ASHG19A3A038809	13481.3	13160	12169.3	5860.43	5806.78	4135.56	6213.66	13.5031	13.4853	13.4198	12.6453	12.6723	12.1335	12.6664	P	P	P	P	P	M	P	noncoding	ENST00000451550	ATP5J2P3	Ensembl	258	chr9	+	79655331	79655589	AAGAGGTTACTACTGGTACTACAACAAATACATCAACGTGAAGAAGGGGAGCATCTCGGG	intergenic
ASHG19A3A052956	19.9995	12.2729	14.0497	14.5106	21.1484	11.6619	31.2155	4.48804	4.01041	4.07638	3.59618	4.27855	3.29512	4.7202	A	P	A	P	M	A	P	noncoding	AK021726		misc_RNA	1514	chr15	+	62786318	62787833	ATATCTGCTTGGGAAAGGGCTGTGTGACCCTATTTAGAAAAATGGCTACACTTTGTTAAC	intergenic
ASHG19A3A055165	28.9902	24.684	28.0259	43.4392	60.5514	38.3703	58.1303	5.02115	4.87043	5.0314	5.27952	5.85847	5.14803	5.66149	A	P	P	P	P	P	P	noncoding	uc002ske.2	AK123453	UCSC_knowngene	1654	chr2	+	74375171	74377170	CTCCTCAGCTCAGAAACACTCCAAGGTGCGGGGACTCGTGGAAGGATTTGATTCGCGCTT	bidirectional	NM_001035505	BOLA3	bolA-like protein 3 isoform 2	-	74362527	74375039
ASHG19A3A055165	28.9902	24.684	28.0259	43.4392	60.5514	38.3703	58.1303	5.02115	4.87043	5.0314	5.27952	5.85847	5.14803	5.66149	A	P	P	P	P	P	P	noncoding	uc002ske.2	AK123453	UCSC_knowngene	1654	chr2	+	74375171	74377170	CTCCTCAGCTCAGAAACACTCCAAGGTGCGGGGACTCGTGGAAGGATTTGATTCGCGCTT	bidirectional	NM_212552	BOLA3	bolA-like protein 3 isoform 1	-	74362527	74375039
ASHG19A3A010292	61.7377	52.9849	54.7763	62.1651	80.9745	52.7104	101.199	6.0762	5.88509	5.95519	5.82033	6.2888	5.62398	6.48539	P	P	P	P	P	P	P	noncoding	AK091642		misc_RNA	2600	chr18	-	44366661	44369260	TGTAGAGCTTGGACTCCTTCAACTTAATGGTAAAGCCTCCTCTGAGTTCAAGAATTTTTT	intergenic
ASHG19A3A023267	100.891	109.859	91.5228	69.8751	76.8778	87.6204	100.745	6.77096	6.87971	6.66274	5.99765	6.21075	6.37061	6.4787	P	P	P	P	P	P	P	noncoding	uc003erl.1	AX746877	UCSC_knowngene	1139	chr3	+	136734712	136735851	TTCCACTTGAACTTTCTGAGAACGGTTTAAAGGTGAAATAATCTGATACACTTCTCTGTC	intergenic
ASHG19A3A024191	62532	68510	64228.2	36871.3	37135.9	40821	41043.5	15.6445	15.8357	15.7882	15.3857	15.3554	15.4888	15.4325	P	P	P	P	P	M	P	noncoding	ENST00000484463	RP11-463H12.1	Ensembl	214	chr4	-	55842324	55842538	TCCTTTATACCCTGATCATCACTGACAAAGAGAAGGCAGAGAAACTGAACTAGTCCCTGC	intergenic
ASHG19A3A036531	89.8582	81.1562	81.6029	51.6116	116.441	77.6411	169.006	6.60617	6.46259	6.50894	5.54543	6.83315	6.19664	7.26457	P	P	P	P	P	P	P	noncoding	ENST00000516854	AC124073.1	Ensembl	280	chr8	+	36124002	36124282	CCCTTCTACAGCCTCCATATCAGCAGCTAAATGCCATTTATTTAAGTTTATAGAAAACAA	intergenic
ASHG19A3A031631	6808.89	7281.24	6430.8	1690.63	1861.69	1560.77	1957.97	12.5438	12.6539	12.5215	10.8198	10.9885	10.7091	10.9722	P	P	P	P	M	M	M	noncoding	AL049354		NRED	1275	chr6	+	52532698	52533951	ACTTCACAGAAATGGAAGGTAACCTCTTTAGACGTGTGCCTGCAAGATGGCTGTCATTGT	intergenic
ASHG19A3A042749	190.589	201.708	182.863	128.168	123.887	99.0427	141.08	7.63778	7.70644	7.6122	6.90014	6.92567	6.55636	6.99761	P	P	P	P	P	M	M	noncoding	NR_029396	LOC399753	RefSeq_NR	2141	chr10	-	49218160	49239658	ACTGTTGAAGTTGGTGAGGACCTCCACATGCACCAGGTTCGTGACCGGGAGATGCCTGAA	intergenic
ASHG19A3A034026	15.8234	14.2845	14.8355	22.9257	19.1746	32.3392	30.1102	4.14729	4.19063	4.15513	4.31234	4.13236	4.8904	4.6632	A	A	A	P	P	P	M	noncoding	ENST00000429983	AC007095.2	Ensembl	1135	chr7	+	20621694	20622829	TTCTTGAAATAGGGTGAAGCTGTTGTCACTGAAATTGTTTCTGTCAAGCCCAGGTGGGTC	intergenic
ASHG19A3A023503	838.449	1121.43	921.183	396.08	846.248	979.267	1143.93	9.61294	10.0122	9.79899	8.61969	9.82958	10.0239	10.1861	P	P	P	P	M	P	P	noncoding	ENST00000494900	RP11-152C17.1	Ensembl	429	chr3	+	168720861	168723254	CGGTCCAAAGTATTTGACTTGCTAAAGAATCTTTCCCTCCTAGAAGTATAAAATTCTACT	intergenic
ASHG19A3A044663	5	5.86077	5	30.9136	39.594	44.5766	47.6053	2.37766	3.07046	2.39437	4.76896	5.215	5.37485	5.36188	A	A	A	P	P	P	P	noncoding	HIT000018047		H-invDB	1571	chr10	+	132084754	132086326	GTCTAATGGATTTTGGTCCACAGGAAGCTTGTGTTTTTCAAAGACATGTTTACAGAATAA	intergenic
ASHG19A3H0000066	241.501	324.263	255.941	233.189	340.411	366.709	381.446	7.95126	8.34316	8.05805	7.81059	8.45052	8.52229	8.50519	P	P	P	P	P	P	P	noncoding	nc-HOXB9-189-	nc-HOXB9-189	HOX cluster	138	chr17	-	46720237	46720375	AGCAACCTTTTTGCTTCAGGGCTCCTCCTGGGGGCTGAGTGGTCCCCTTTGCTTTGCTAT	intergenic
ASHG19A3A031608	2601.45	3185.68	2513.85	814.022	751.191	793.899	849.097	11.1934	11.4852	11.2064	9.73127	9.65224	9.70677	9.73144	P	P	P	P	P	P	P	noncoding	ENST00000402892	RP1-142O9.2	Ensembl	195	chr6	+	49241240	49241435	AGTCCTACCTCAGATTCTGCATCTGTACAGAGAGCAGACACCAGCTTAAATGACTGTGAA	intergenic
ASHG19A3A041217	118.166	154.815	113.79	133.696	151.95	141.553	177.946	6.98507	7.34848	6.96325	6.96233	7.23162	7.08996	7.34532	P	P	P	P	P	P	P	noncoding	ENST00000453566	RP3-346O6.2	Ensembl	213	chrX	+	76983343	76983556	TTAGCGGTAGAATGTGTTATGTACAATGCCACCTCTCCTCGAATCCATAAAAAAGTGTAA	intronic antisense	NM_000489	ATRX	transcriptional regulator ATRX isoform 1	-	76760355	77041719
ASHG19A3A041217	118.166	154.815	113.79	133.696	151.95	141.553	177.946	6.98507	7.34848	6.96325	6.96233	7.23162	7.08996	7.34532	P	P	P	P	P	P	P	noncoding	ENST00000453566	RP3-346O6.2	Ensembl	213	chrX	+	76983343	76983556	TTAGCGGTAGAATGTGTTATGTACAATGCCACCTCTCCTCGAATCCATAAAAAAGTGTAA	intronic antisense	NM_138270	ATRX	transcriptional regulator ATRX isoform 2	-	76760355	77041719
ASHG19A3A036131	37.4376	44.8996	42.2359	39.952	43.9486	36.8538	44.6624	5.37689	5.66613	5.59708	5.15303	5.37063	5.08899	5.26841	P	P	P	P	P	P	P	noncoding	uc003ysg.2	BC042052	UCSC_knowngene	3296	chr8	-	128698589	128746210	AAGAGATGGTGAAAATTAACCTATCACCACTGCTAATGAACATCACCCTATGGAGAACCG	intergenic
ASHG19A3L0001531	1275.03	1523.06	1277.14	181.956	234.7	258.938	287.957	10.188	10.4382	10.2449	7.43677	7.89029	8.00739	8.08364	P	P	P	P	P	P	P	noncoding	DN920247	lincRNA-SCARB2	lincRNA	527	chr4	-	77102106	77155656	GCCTATGTTTTTGAACAAGACCAATCTGTTGGAGACCCTAAAATTGACTTAAATAGAACA	exon sense-overlapping	NM_001204255	SCARB2	lysosome membrane protein 2 isoform 2	-	77079891	77135052
ASHG19A3L0001531	1275.03	1523.06	1277.14	181.956	234.7	258.938	287.957	10.188	10.4382	10.2449	7.43677	7.89029	8.00739	8.08364	P	P	P	P	P	P	P	noncoding	DN920247	lincRNA-SCARB2	lincRNA	527	chr4	-	77102106	77155656	GCCTATGTTTTTGAACAAGACCAATCTGTTGGAGACCCTAAAATTGACTTAAATAGAACA	exon sense-overlapping	NM_005506	SCARB2	lysosome membrane protein 2 isoform 1	-	77079891	77135052
ASHG19A3A031937	139.004	167.194	130.607	80.627	78.9978	84.1397	86.0671	7.20401	7.44756	7.15421	6.2183	6.25213	6.31013	6.2479	P	P	P	P	P	P	P	noncoding	AK054575		misc_RNA	1830	chr6	+	111217337	111219955	CCCAGACAATAGATTTTAGATTTGTAAACATCTTAATATGGAGGGTTTTGTGTGTGTGTG	intergenic
ASHG19A3A044524	16.438	12.4684	19.5945	14.4734	82.2521	36.3034	47.6195	4.20059	4.029	4.54105	3.5926	6.3141	5.0635	5.36307	A	A	P	P	P	P	P	noncoding	ENST00000436932	RP11-106M7.1	Ensembl	2378	chr10	+	116524546	116539662	GGCTGTTTGACATTGATTTTTTAAAAAATACATTTCCTGAGGTCTCACTAGTGCCAGAAT	intergenic
ASHG19A3A039633	27523.2	24938.7	23023.8	22168.8	20612.1	19777.9	19491.8	14.5019	14.3876	14.3245	14.6229	14.5157	14.4549	14.342	P	P	P	P	P	P	P	noncoding	ENST00000399997	RP11-431J24.4	Ensembl	855	chrX	-	16216550	16217414	ATCTGCTATGTGTTGCAGAAAGGCCATGTACAAGCGGAAGTACTCAGCTGCTAAATCCAA	intergenic
ASHG19A3A033158	5	6.27393	5	102.812	47.1456	116.309	46.8122	2.37766	3.27582	2.39437	6.57411	5.47833	6.79616	5.33655	A	A	A	P	P	P	P	noncoding	ENST00000428690	AC007566.11	Ensembl	1098	chr7	-	92042286	92068876	GCAACAGCTGCAACCACTCTGGTGATGCTAGCACTCACTTTGTTTGCTCTACAAACAAAA	intergenic
ASHG19A3A016397	40.2711	30.5981	29.8672	45.0878	70.2361	37.6724	27.8047	5.47538	5.15255	5.12105	5.33868	6.07759	5.11997	4.53837	A	P	P	P	P	P	P	noncoding	NR_024275	LOC151162	RefSeq_NR	5251	chr2	+	135206959	135212191	TTTTTTCTTAGGCCCACTGAGATCCCTGCTCAGTGCGTCTCAATTGTATCTCCAGTCTAA	intergenic
CUST_471_PI426073487	113.884	80.6629	111.456	224.667	57.9426	155.492	75.1647	6.93158	6.45467	6.9379	7.75119	5.79143	7.2371	6.04883	P	P	P	P	P	P	P	noncoding	uc.473+	uc.473	UCR	222	chrX	+	70373223	70373445	GCAGTCATGCTGTTTTTGAATTCTCTCTCTGTTTTGTTCTCTGTTCTGTGCTGTTGTGTC	exon sense-overlapping	NM_181303	NLGN3	neuroligin-3 isoform 1	+	70364680	70391051
CUST_471_PI426073487	113.884	80.6629	111.456	224.667	57.9426	155.492	75.1647	6.93158	6.45467	6.9379	7.75119	5.79143	7.2371	6.04883	P	P	P	P	P	P	P	noncoding	uc.473+	uc.473	UCR	222	chrX	+	70373223	70373445	GCAGTCATGCTGTTTTTGAATTCTCTCTCTGTTTTGTTCTCTGTTCTGTGCTGTTGTGTC	intron sense-overlapping	NM_001166660	NLGN3	neuroligin-3 isoform 3	+	70364680	70391051
CUST_471_PI426073487	113.884	80.6629	111.456	224.667	57.9426	155.492	75.1647	6.93158	6.45467	6.9379	7.75119	5.79143	7.2371	6.04883	P	P	P	P	P	P	P	noncoding	uc.473+	uc.473	UCR	222	chrX	+	70373223	70373445	GCAGTCATGCTGTTTTTGAATTCTCTCTCTGTTTTGTTCTCTGTTCTGTGCTGTTGTGTC	exon sense-overlapping	NM_018977	NLGN3	neuroligin-3 isoform 2	+	70364680	70391051
ASHG19A3A017906	99.4895	98.1086	76.3789	285.663	115.888	190.992	138.905	6.75418	6.72928	6.41329	8.1213	6.82467	7.54505	6.97393	P	P	P	P	P	P	P	noncoding	NR_028295	NCRNA00029	RefSeq_NR	1764	chr20	-	61665569	61668380	GCAGCTGAGAGGCTCCCCGTCACGATGGCCAATAGCCCTTTCTCCAAGGACAAGGATGGG	intergenic
ASHG19A3A026669	30.5809	32.8276	18.4055	93.5663	13.8272	24.3112	24.9441	5.09394	5.24979	4.4508	6.43843	3.60478	4.46216	4.37865	P	P	P	P	A	P	P	noncoding	ENST00000515352	CTD-2517O10.5	Ensembl	425	chr5	-	34860887	34861611	CCTTGAGCAGAAAGCCAAATCTCACCTAGTAGGAAAGAAAAATAGTAGATATGAGGAAGA	intronic antisense	NM_144725	TTC23L	tetratricopeptide repeat protein 23-like	+	34839268	34899564
ASHG19A3A030892	542.751	551.384	470.391	495.617	305.528	270.157	282.948	9.03321	9.05218	8.88382	8.97798	8.28776	8.07558	8.05517	P	P	P	P	P	P	P	noncoding	BC043429		misc_RNA	2596	chr6	+	3020389	3022972	GACCCCGACCGTTTGCTGTTTTCTCCTCCTAATCATAATTTTTTCTTAGTTGGTTTCCAG	intergenic
ASHG19A3A044384	14140.2	13590.9	12375.7	3762.29	3902.62	3907.8	4013.68	13.5573	13.5321	13.4476	11.9856	12.0833	12.0483	12.0132	P	P	P	P	P	P	P	noncoding	ENST00000453578	RP11-316M21.5	Ensembl	825	chr10	+	102008027	102008852	TGAGATCCTCAAGTCAGTGGTGGCTCACTTTGATGCTGGAGAACTAATCACCTAAAGAGA	intronic antisense	NM_018294	CWF19L1	CWF19-like protein 1	-	101992054	102027437
ASHG19A3L0001694	37.9567	23.6876	33.2085	119.784	49.4023	24.1617	40.4098	5.39489	4.81917	5.26363	6.79748	5.54616	4.45434	5.11583	A	P	P	P	P	P	P	noncoding	chr5:82684694-82704544+	lincRNA-VCAN	lincRNA	19851	chr5	+	82684694	82704544	TGATTTGACTAAATCAATTGTGATCATTCCATTTTCCCTGTCACTATTGTCTGAGGAAGT	intergenic
ASHG19A3A008425	276.779	260.055	224.713	143.55	150.524	166.696	157.509	8.12505	8.04314	7.88002	7.06999	7.21744	7.33923	7.16288	P	P	P	P	P	P	P	noncoding	AL117601		RNAdb	2586	chr17	-	42751058	42753625	TTCTGACTTGTACAATAGTGACTATAGTTTGAGTAGAACACAGACTGTCTTGAAACAGTT	natural antisense	NM_001145080	C17orf104	hypothetical protein LOC284071	+	42733761	42753165
ASHG19A3A007134	715.658	690.014	605.086	667.938	590.848	550.937	617.407	9.40975	9.35752	9.22644	9.42231	9.28961	9.1536	9.2441	P	P	P	P	P	P	P	noncoding	NR_003239	SNHG11	RefSeq_NR	1101	chr20	+	37075296	37079564	CATGCTAGACCTCAGTATCCTTGAGGGATGCTGCCTTGGGTCTGGAAACTGTTAGAGGAA	intergenic
ASHG19A3A016770	1000.3	924.718	828.421	134.536	125.152	129.808	130.343	9.86453	9.75429	9.66143	6.97311	6.94096	6.96193	6.87067	P	P	P	P	P	P	P	noncoding	uc010fsr.1	AK096649	UCSC_knowngene	2600	chr2	+	200323330	200325930	CTTCCGATTTAAAGGAGAGTTCTAGGAAGTTTTGTGATCTATGTCCGGTGTGGGTTTTTG	natural antisense	NM_001172517	SATB2	DNA-binding protein SATB2	-	200134222	200329831
ASHG19A3A016770	1000.3	924.718	828.421	134.536	125.152	129.808	130.343	9.86453	9.75429	9.66143	6.97311	6.94096	6.96193	6.87067	P	P	P	P	P	P	P	noncoding	uc010fsr.1	AK096649	UCSC_knowngene	2600	chr2	+	200323330	200325930	CTTCCGATTTAAAGGAGAGTTCTAGGAAGTTTTGTGATCTATGTCCGGTGTGGGTTTTTG	natural antisense	NM_015265	SATB2	DNA-binding protein SATB2	-	200134222	200335989
ASHG19A3A016770	1000.3	924.718	828.421	134.536	125.152	129.808	130.343	9.86453	9.75429	9.66143	6.97311	6.94096	6.96193	6.87067	P	P	P	P	P	P	P	noncoding	uc010fsr.1	AK096649	UCSC_knowngene	2600	chr2	+	200323330	200325930	CTTCCGATTTAAAGGAGAGTTCTAGGAAGTTTTGTGATCTATGTCCGGTGTGGGTTTTTG	bidirectional	NM_001172509	SATB2	DNA-binding protein SATB2	-	200134222	200322819
ASHG19A3A009926	80.0843	70.0793	70.6281	88.2532	61.7244	47.0736	40.6091	6.45556	6.26457	6.30288	6.35287	5.88678	5.45517	5.12351	P	P	P	P	P	P	P	noncoding	AK094291		RNAdb	2161	chr17	+	73126977	73129138	TCAGGACTTTATGTGGAACTGACATCGCTTACCTACTCCCGTCTAGAAAATGCTGAACAG	natural antisense	NM_014595	NT5C	5'(3')-deoxyribonucleotidase, cytosolic type	-	73126322	73127877
ASHG19A3A018848	22.4944	15.9465	21.7882	51.0454	42.242	41.7784	41.6366	4.65623	4.32251	4.68182	5.53047	5.31279	5.27482	5.16183	A	P	P	P	P	P	P	noncoding	ENST00000432988	AP000689.8	Ensembl	4651	chr21	-	37513704	37523008	TTAAGCAGCAAGCTCCGAAGCAGACGTTTACCAGTTTTGCACAACTTTGTCATGGACCAA	natural antisense	NM_001236	CBR3	carbonyl reductase [NADPH] 3	+	37507262	37518860
ASHG19A3A023158	414.428	403.864	401.82	320.688	156.345	163.375	136.557	8.68516	8.64555	8.68557	8.29642	7.27689	7.3112	6.94881	P	P	P	P	P	P	P	noncoding	ENST00000485218	RP11-525K18.2	Ensembl	588	chr3	+	127794652	127797899	GAAAAAATAGGAGGAAAATTAAAATAATCCCACCTTCCTACCTATCCAGAACCATCTCCC	intergenic
ASHG19A3A019513	43.1378	41.2167	33.9672	120.278	21.158	16.3391	10.8111	5.57541	5.55038	5.2918	6.80651	4.27937	3.84327	3.04961	P	P	P	A	P	M	M	noncoding	HIT000389476		H-invDB	280	chr22	-	21311691	21318877	TCATTGTCCTTAATGTGTGCATCTCTGCGTTGTAGGTAGACCTTGTCTTTCAAGCAGGCT	bidirectional	NM_144704	AIFM3	apoptosis-inducing factor 3 isoform 1	+	21319417	21335649
ASHG19A3A019513	43.1378	41.2167	33.9672	120.278	21.158	16.3391	10.8111	5.57541	5.55038	5.2918	6.80651	4.27937	3.84327	3.04961	P	P	P	A	P	M	M	noncoding	HIT000389476		H-invDB	280	chr22	-	21311691	21318877	TCATTGTCCTTAATGTGTGCATCTCTGCGTTGTAGGTAGACCTTGTCTTTCAAGCAGGCT	bidirectional	NM_001018060	AIFM3	apoptosis-inducing factor 3 isoform 2	+	21319417	21335649
ASHG19A3A012619	422.949	393.798	367.337	177.83	117.527	123.077	128.637	8.71546	8.61148	8.56621	7.39996	6.84563	6.88378	6.85138	P	P	P	P	P	P	P	noncoding	ENST00000504080	AC016590.1	Ensembl	2659	chr19	+	37816411	37820601	GTGACGTGCCTTTTTGTCTTGGTTGGGTATTTATTTGCAATACAAGAATGATTGTTTTCT	intergenic
ASHG19A3L0002146	87.2297	64.0021	80.9334	94.3641	61.0649	50.8797	43.2195	6.5674	6.1396	6.49864	6.45104	5.86945	5.56802	5.21823	P	P	P	P	P	P	P	noncoding	DB239440	lincRNA-SLC7A13	lincRNA	578	chr8	-	87229854	87333375	GGCCAGCTGCCTTTGCTATTTAATACACTTAATAGTCACTCTTCTCCATTTACAGCTGTG	exon sense-overlapping	NM_138817	SLC7A13	solute carrier family 7 member 13	-	87226287	87242604
ASHG19A3A038676	40.6828	31.7851	29.6401	51.8288	39.6666	39.1248	32.6855	5.48921	5.2048	5.11249	5.55056	5.2171	5.17735	4.79162	P	P	P	P	P	P	P	noncoding	uc004ads.2	LOC643648	UCSC_knowngene	1168	chr9	+	46763790	46833318	CGCTAGGCGGGAGGCTGGAGCAGTAAGATGGCAGCCGGAGCGGTAGGGGGGTGGCTGGCA	intergenic
ASHG19A3H0000025	232.254	245.097	234.186	220.403	191.125	151.826	232.761	7.90136	7.96442	7.93342	7.71956	7.57712	7.19799	7.75422	P	P	P	P	P	P	P	noncoding	nc-HOXA4-63-	nc-HOXA4-63	HOX cluster	108	chr7	-	27176447	27176555	CTAAGCTCCCACCCAAGTAGGGGAGGGGATCCACAGCCCCAGCCATTCTAAGCCCCAGAA	intergenic
ASHG19A3A043471	29447.2	28427.2	28635	13624.9	14580.7	15952.3	16584.2	14.5986	14.5986	14.6418	13.8955	14.0271	14.1186	14.1013	P	P	P	P	P	P	P	noncoding	ENST00000418634	RP13-439H18.7	Ensembl	693	chr10	-	134958115	134958808	TCTGAAAACAAGGAATTTAATGCAGAAGTACACGGAAGGGCATCATGGGCCAGAATGTTG	intergenic
ASHG19A3A010149	3114.03	3084.31	2940.06	5184.72	5139.45	5204.91	5216	11.4487	11.4399	11.425	12.4689	12.4734	12.4701	12.4021	P	P	P	P	M	P	P	noncoding	ENST00000399792	AP000902.2	Ensembl	540	chr18	-	9678756	9679297	TTCATGAAGAAGAACCATGAAGAGGAAGTAAAAGGCCTACAAGCCCAGACTGCCAGATCT	intergenic
ASHG19A3A007680	1091.5	1049.82	1006.55	2647.26	3069.53	2379.89	3111.04	9.97522	9.91978	9.92498	11.4743	11.7279	11.3296	11.6562	P	P	P	P	P	P	P	noncoding	NR_028582	G6PC3	RefSeq_NR	1713	chr17	+	42148097	42153711	GGTCCCCACCCCCGAGGGCCCTGAGTCATGTGTTTCTTTTTGGAGACAGGCCCTTTTGGT	exon sense-overlapping	NM_138387	G6PC3	glucose-6-phosphatase 3	+	42148097	42153712
ASHG19A3A034572	511.338	483.631	477.609	43.8894	56.3337	54.0803	48.5439	8.95752	8.8834	8.90568	5.29721	5.74657	5.66281	5.39017	P	P	P	P	P	P	P	noncoding	ENST00000403118	AC005102.1	Ensembl	479	chr7	+	75464980	75465459	AGATTGATACATAACAGACACCTGCACAGAGCGTAAACAGAGGTGGCATGACTAGAAACC	intergenic
ASHG19A3A022563	21.9745	16.0679	16.7652	30.095	32.9353	33.5371	43.4179	4.62234	4.33165	4.32529	4.7289	4.93729	4.9418	5.22377	A	P	A	P	P	P	M	noncoding	AJ312775		misc_RNA	2291	chr3	+	46598887	46601178	GAGAAATGTAATTCTAGTTCCCATCTTAGAGGAATGGTCTCTTCTTAATGTCTTTGTGTT	intronic antisense	NM_024512	LRRC2	leucine-rich repeat-containing protein 2	-	46556877	46608011
ASHG19A3A011204	81287.4	77911.7	76664.5	50758.9	71963.5	69158.7	74097.7	16.0293	16.0364	16.0533	15.8589	16.3227	16.2418	16.3064	P	P	P	P	P	P	P	noncoding	ENST00000469924	CTD-3131K8.1	Ensembl	477	chr19	-	17700403	17700880	AAATGATCAGAAAAAGAAAGAAGCCAAAGAGAAAGGTGCCTGGGTTCAACTGAAGCGCCA	intergenic
ASHG19A3A046623	35.0279	13.3724	31.3481	20.3622	43.3873	30.5204	49.2353	5.28856	4.11076	5.1849	4.13002	5.35239	4.80469	5.40931	A	P	P	P	P	P	P	noncoding	ENST00000450606	RP5-1155K23.4	Ensembl	307	chr1	-	62673807	62674114	ATTCACACCAACAGGGAGAGGAGCTGAGTGCCGTCTTGGCCACCATGATGAAACCAGCTG	intronic antisense	NM_001164835	L1TD1	LINE-1 type transposase domain-containing	+	62660473	62678001
ASHG19A3A046623	35.0279	13.3724	31.3481	20.3622	43.3873	30.5204	49.2353	5.28856	4.11076	5.1849	4.13002	5.35239	4.80469	5.40931	A	P	P	P	P	P	P	noncoding	ENST00000450606	RP5-1155K23.4	Ensembl	307	chr1	-	62673807	62674114	ATTCACACCAACAGGGAGAGGAGCTGAGTGCCGTCTTGGCCACCATGATGAAACCAGCTG	intronic antisense	NM_019079	L1TD1	LINE-1 type transposase domain-containing	+	62660473	62678001
ASHG19A3A042085	12.9801	12.4804	19.9007	14.2834	28.8946	16.0466	38.908	3.87931	4.03009	4.56114	3.5705	4.74749	3.81381	5.05444	A	A	P	P	M	P	P	noncoding	ENST00000433044	RP11-293G6__B.7	Ensembl	522	chr1	+	235700819	235701341	TTTACTATTATGAGTATTAAAGGGGTTGCTGTCGGTTTGGTGAATAGTTGAGCATGATGG	intergenic
ASHG19A3A010639	846.852	827.343	792.48	229.93	255.817	254.81	308.03	9.63144	9.61076	9.60041	7.79072	8.03319	7.9827	8.18456	P	P	P	P	M	P	M	noncoding	ENST00000432117	AC037473.1	Ensembl	741	chr18	+	45156482	45157223	CCTGGGAAAGAAGTTTCAATATCTCCTGTGTGTCTTTCTTACGATCCAACTAAACATCCA	intergenic
ASHG19A3A043485	43.0359	34.6833	42.0674	43.6344	47.0387	44.3156	60.3775	5.5711	5.32267	5.59231	5.28856	5.47505	5.36383	5.71551	P	P	P	P	P	P	P	noncoding	ENST00000394842	XX-2136C111.2	Ensembl	485	chr10	-	135450911	135451396	AAATGGACTGTGAGGATAAGGTTCTGGGCAGGATGGTTCGCTGCCCTCCAGAGACGCAGA	intergenic
ASHG19A3L0000558	926.606	998.668	863.312	650.822	845.083	579.502	1059.83	9.75372	9.85516	9.71685	9.38379	9.82727	9.23329	10.0674	P	P	P	P	P	P	P	noncoding	AI014992	lincRNA-KLRB1	lincRNA	458	chr12	+	9486815	9488187	TATAAACACTTCCTCCCAGATTCTGAGCAGGATGACAGATCCCAGGACCAACTCTAAAGT	intergenic
ASHG19A3A025664	209.039	188.48	179.224	42.4266	70.9837	47.4259	54.3255	7.75836	7.61188	7.58606	5.24305	6.09068	5.46654	5.55971	P	P	P	P	P	P	P	noncoding	ENST00000430198	HMGA1L2	Ensembl	324	chr4	+	73964538	73964862	CCGGAAAACCACCACAACTCCAGGAAGGAAACCAAGGGGCAGACCCAAAAAACTGGAGAA	intronic antisense	NM_032217	ANKRD17	ankyrin repeat domain-containing protein 17	-	73940501	74124502
ASHG19A3A025664	209.039	188.48	179.224	42.4266	70.9837	47.4259	54.3255	7.75836	7.61188	7.58606	5.24305	6.09068	5.46654	5.55971	P	P	P	P	P	P	P	noncoding	ENST00000430198	HMGA1L2	Ensembl	324	chr4	+	73964538	73964862	CCGGAAAACCACCACAACTCCAGGAAGGAAACCAAGGGGCAGACCCAAAAAACTGGAGAA	intronic antisense	NM_198889	ANKRD17	ankyrin repeat domain-containing protein 17	-	73940501	74124502
ASHG19A3A027869	32.4325	33.4713	34.8573	70.0219	70.8007	74.2568	78.5609	5.17698	5.27314	5.32898	5.99975	6.08694	6.13452	6.11352	P	P	P	P	P	P	P	noncoding	ENST00000511693	RP11-259O2.1	Ensembl	718	chr5	+	1933976	1959290	AGATCATCACGTGGAGTATCGGTGGCCTTATTAAAACAAAAACAACAACTCCACAGCCCG	intergenic
CUST_147_PI426075208	11.939	6.9824	6.81504	14.1339	18.1329	14.8243	21.6023	3.75931	3.38813	3.12843	3.55366	4.04108	3.68465	4.15131	A	A	A	P	P	P	P	noncoding	nc-HOXC6-351+	nc-HOXC6-351	HOX cluster	875	chr12	-	54406545	54407420	AGGTAGAGAATAGGGAAGAGCTGTGGAGAAAAAGCAAGTCATTCCAGCTTCTATTATTTT	intergenic
ASHG19A3A000524	129.168	125.197	108.813	316.624	369.901	370.096	372.974	7.10306	7.05784	6.90522	8.27899	8.56879	8.53911	8.4659	P	P	P	P	P	P	P	noncoding	HIT000391139_02		H-invDB	320	chr9	+	44990250	44991184	GGCCTGCCCGGACGGTGTTGGTTGGGGAGAGCAGCGGATCCACGCCAGAGAAGATGCTTG	intergenic
ASHG19A3A031671	1402.48	1407.01	1297.35	990.023	992.982	944.663	985.351	10.3172	10.3267	10.2671	10.0239	10.0746	9.96795	9.96054	P	P	P	P	P	P	P	noncoding	ENST00000403408	RP11-184C23.3	Ensembl	250	chr6	+	63937387	63937637	AAAGAAGAACTGATTGAAGAGTGGCAACCACAACCTCTTGTTCCTCCTGTCCCAAAAGAC	intergenic
ASHG19A3A053309	29.3439	17.4299	23.9162	35.5373	58.5504	30.3498	62.8281	5.03745	4.43639	4.80593	4.97776	5.80793	4.79679	5.77844	A	P	P	P	P	P	P	noncoding	uc002bxz.3	DQ587117	UCSC_knowngene	177	chr15	+	102294271	102294448	TCTCAGAGCTGCTGTCCAAACTGCACTCGCGTGGGAACGAGAAGACACTCATGGAGGAGT	intergenic
ASHG19A3A025034	33.7881	14.3623	23.2328	32.1403	28.7674	26.3063	53.1655	5.23671	4.19683	4.76746	4.8289	4.74084	4.57991	5.52971	A	P	P	P	P	P	P	noncoding	ENST00000506895	RP11-376O6.2	Ensembl	753	chr4	-	178264157	178278186	TGACTTTTAAAAAGTTTTACTAGGGTACCACGTCCAGTGTCTTGACCCCAGGCTGGTAAC	intronic antisense	NM_018248	NEIL3	endonuclease 8-like 3	+	178230990	178284092
ASHG19A3L0000092	32.155	33.8418	32.8474	38.8349	51.5748	32.3925	51.38	5.16337	5.28771	5.24833	5.11341	5.61122	4.89283	5.47424	P	P	P	P	P	M	P	noncoding	chr1:231020477-231031277-	lincRNA-C1orf198	lincRNA	10801	chr1	-	231020477	231031277	AATGCCCCATGTGCATTTGGATGACAAATGGACAATACTGGTTTCTTTCCAGCCAAGCTG	intergenic
ASHG19A3A031612	34.6339	23.243	27.1379	35.9177	39.3886	33.3602	49.3854	5.27127	4.79379	4.98877	4.99461	5.2081	4.9326	5.41387	A	P	P	P	M	P	P	noncoding	AK126282		misc_RNA	2077	chr6	+	49689643	49691720	CCCCTGGCATACAGCAGTAAAAACTGTGATCCTCTTTATCATTATCTTGGTTTTTTCTTT	intergenic
ASHG19A3A051898	168832	151137	129497	110277	122683	118356	119090	17.1097	17.0118	16.8434	16.9802	17.0436	16.9802	16.9607	P	P	P	P	P	P	P	noncoding	ENST00000460876	RP11-2F9.1	Ensembl	624	chr15	-	22440222	22440846	AGCAGATGGGTATGTGCTAGAGGGCAAAGAGTTGGAGTTCTATCTTAGGAAAATCAAGGC	intergenic
ASHG19A3A030410	37.4948	27.5843	31.2807	34.4291	38.3674	28.2215	45.904	5.37908	5.01757	5.18217	4.93056	5.16924	4.68598	5.30448	A	P	P	P	P	P	P	noncoding	ENST00000421737	RP1-124C6.1	Ensembl	524	chr6	-	113749741	113754623	CCATCTTTCCAAATCATCTCTGTCTGCAGTGACCATGTCTTAATCCTGAAGGAAAACAAG	intergenic
ASHG19A3A018723	36.5599	30.5528	39.5593	59.3611	66.34	62.2778	74.9635	5.34562	5.15032	5.50546	5.75047	5.99372	5.87047	6.04364	P	P	P	P	P	P	P	noncoding	ENST00000433310	AF131217.1	Ensembl	900	chr21	-	29816869	30047170	TTGTGGAGTAAGTGAGTGGGCCTGAGTTGAGAAGATCCTGGCCTTGGATTTTAAAACTGT	intergenic
ASHG19A3A047824	384.449	385.987	330.49	477.509	549.82	471.811	645.513	8.58564	8.58227	8.41692	8.91549	9.18208	8.91504	9.31218	P	P	P	P	P	P	P	noncoding	AK093825		misc_RNA	3180	chr12	-	75885884	75889064	GAGACTGCCCTGTTCTCCTTTGGAGCTCAGTAAAACAAATATTTGTTGAATAAATGAATA	intronic antisense	NM_006851	GLIPR1	glioma pathogenesis-related protein 1 precursor	+	75874512	75895716
ASHG19A3A032325	51.6309	40.8825	46.6421	56.1854	77.5125	53.425	102.17	5.82751	5.53922	5.73422	5.66314	6.22342	5.64595	6.50172	P	P	P	P	P	P	P	noncoding	AK095067		misc_RNA	2140	chr6	+	167064993	167067133	AATACAGCTGTCCAGGCCCTGCACATATTTTGTATCACTTGATAAAAATAGCTAATAGCA	intronic antisense	NM_001006932	RPS6KA2	ribosomal protein S6 kinase alpha-2 isoform b	-	166822853	167275771
ASHG19A3A031058	277.739	298.095	253.803	173.194	183.112	181.987	173.839	8.12881	8.22228	8.04611	7.35416	7.51231	7.47295	7.30809	P	P	P	P	P	M	P	noncoding	ENST00000405827	RP1-59B16.1	Ensembl	1045	chr6	+	23972106	23973151	TCCAAAAAGCTGCTAAACTGGGATATCCAGGTTAGGAAGAGCGGATATTCCTCTGTGGAA	intergenic
ASHG19A3H0000065	28.952	24.9144	20.1745	28.43	28.3268	26.4656	24.2623	5.01958	4.88387	4.58112	4.64333	4.7157	4.58896	4.33454	A	P	P	P	P	P	P	noncoding	nc-HOXB9-188-	nc-HOXB9-188	HOX cluster	98	chr17	-	46719077	46719175	GGGGCGCTGAGGAGGTCATTAACCTCCCCGTAAAGATGGGGAACGGAGACGCGCCTGGCC	intergenic
ASHG19A3A020083	523.021	575.247	501.255	333.357	504.119	386.448	633.795	8.98605	9.10748	8.97246	8.3605	9.05927	8.60739	9.28574	P	P	P	P	P	P	P	noncoding	U84522		misc_RNA	258	chr22	+	19384143	19384288	ATTCCCCAGGTGGCCTGGCCCATGGCCAGCTCCCTCTCTGTACACAGAAGTCAGGAAGAG	intronic antisense	NM_003325	HIRA	protein HIRA	-	19318223	19419219
CUST_412_PI426073487	54.5808	52.6056	47.5181	50.8744	60.4695	59.004	69.4874	5.90868	5.87592	5.75934	5.52471	5.85683	5.78844	5.92944	P	P	P	P	P	P	M	noncoding	uc.414+	uc.414	UCR	246	chr17	+	38249173	38249419	TGCTTTTCCTTTTCGTCTCGTAAAGGAGAGAGAAGTGCAGAGTTCGATTCTGTACAAGGG	exon sense-overlapping	NM_001190919	THRA	thyroid hormone receptor alpha isoform 2	+	38218445	38250120
CUST_412_PI426073487	54.5808	52.6056	47.5181	50.8744	60.4695	59.004	69.4874	5.90868	5.87592	5.75934	5.52471	5.85683	5.78844	5.92944	P	P	P	P	P	P	M	noncoding	uc.414+	uc.414	UCR	246	chr17	+	38249173	38249419	TGCTTTTCCTTTTCGTCTCGTAAAGGAGAGAGAAGTGCAGAGTTCGATTCTGTACAAGGG	exon sense-overlapping	NM_003250	THRA	thyroid hormone receptor alpha isoform 2	+	38219067	38250120
CUST_412_PI426073487	54.5808	52.6056	47.5181	50.8744	60.4695	59.004	69.4874	5.90868	5.87592	5.75934	5.52471	5.85683	5.78844	5.92944	P	P	P	P	P	P	M	noncoding	uc.414+	uc.414	UCR	246	chr17	+	38249173	38249419	TGCTTTTCCTTTTCGTCTCGTAAAGGAGAGAGAAGTGCAGAGTTCGATTCTGTACAAGGG	natural antisense	NM_021724	NR1D1	nuclear receptor subfamily 1 group D member 1	-	38249036	38256973
CUST_412_PI426073487	54.5808	52.6056	47.5181	50.8744	60.4695	59.004	69.4874	5.90868	5.87592	5.75934	5.52471	5.85683	5.78844	5.92944	P	P	P	P	P	P	M	noncoding	uc.414+	uc.414	UCR	246	chr17	+	38249173	38249419	TGCTTTTCCTTTTCGTCTCGTAAAGGAGAGAGAAGTGCAGAGTTCGATTCTGTACAAGGG	exon sense-overlapping	NM_001190918	THRA	thyroid hormone receptor alpha isoform 3	+	38219067	38250120
ASHG19A3A027020	5523.73	6155.04	5275.37	4047.02	3539.49	3836.94	4016.08	12.2602	12.436	12.2518	12.0924	11.93	12.0152	12.0146	P	P	P	P	P	P	P	noncoding	NR_003665	LOC441089	RefSeq_NR	1362	chr5	-	79646423	79647785	CTTGTGTTTTGTGGGGCTTGGGGTTTGGTAACTTATTTTTATAAGCAATAAACCTTTTGT	intergenic
ASHG19A3A027379	18.261	14.0076	9.97799	13.2052	17.2077	23.7705	21.4777	4.35649	4.16585	3.61595	3.44225	3.9584	4.4292	4.14193	A	P	A	P	M	P	A	noncoding	NR_003023	SCARNA2	RefSeq_NR	420	chr1	+	109642814	109643234	TTGATCAGATAGACGAGGCCGGGCTTGTCCCCGGCCACTGATTATCGAGGCGATTCTGAT	intergenic
ASHG19A3A029872	8097.31	11200.1	8850.6	2259.38	8923.66	9651.58	10631.9	12.7881	13.2566	12.9806	11.2454	13.3104	13.3811	13.4476	P	P	P	P	P	P	P	noncoding	ENST00000444731	RP11-552E20.1	Ensembl	539	chr6	-	40239304	40243976	AGGCTGTGTCTCCCTCCTCAGACTGAAGGATCTTTGTGATCAGATGCTGTGTCTATATCC	intergenic
ASHG19A3A053205	21.9122	21.5629	25.9158	43.6472	30.8107	31.7049	37.4804	4.6173	4.6996	4.92478	5.28901	4.84183	4.86141	4.9992	A	P	P	P	P	P	M	noncoding	NR_026869	NCRNA00052	RefSeq_NR	1786	chr15	+	88120159	88122917	CTCTAAGACTCAGAAGAACTTTCTCAGGCATTCATTTTCCTATCTATTTTGAGCCATTTT	intergenic
CUST_307_PI426073487	48.7506	52.062	41.1347	43.5938	47.7628	47.5771	52.6875	5.74986	5.86334	5.56029	5.28733	5.49803	5.47016	5.51554	P	P	P	P	P	P	P	noncoding	uc.309+	uc.309	UCR	268	chr10	+	103267030	103267298	AAATGAGAAAGTTAAATCTTACTTGAGAGCTGGGAGAGATGAAAGAGAGGTGTTTGTCAG	intron sense-overlapping	NM_033637	BTRC	F-box/WD repeat-containing protein 1A isoform 1	+	103113824	103317070
CUST_307_PI426073487	48.7506	52.062	41.1347	43.5938	47.7628	47.5771	52.6875	5.74986	5.86334	5.56029	5.28733	5.49803	5.47016	5.51554	P	P	P	P	P	P	P	noncoding	uc.309+	uc.309	UCR	268	chr10	+	103267030	103267298	AAATGAGAAAGTTAAATCTTACTTGAGAGCTGGGAGAGATGAAAGAGAGGTGTTTGTCAG	intron sense-overlapping	NM_003939	BTRC	F-box/WD repeat-containing protein 1A isoform 2	+	103113824	103317070
ASHG19A3A019396	65.8795	91.025	58.4235	43.4122	76.1113	120.682	132.478	6.17142	6.62413	6.04532	5.27861	6.19774	6.85502	6.89882	P	P	P	P	P	P	P	noncoding	ENST00000447478	RP4-534N18.2	Ensembl	517	chr1	+	32398620	32399576	CTCTACCATCACCCTATTCGATAAACATAACTAAGTCCACCATGTTAAAACTATGGATCC	intronic antisense	NM_080391	PTP4A2	protein tyrosine phosphatase type IVA 2 isoform	-	32372021	32403988
ASHG19A3A043330	362.393	450.565	332.025	282.024	271.345	297.53	334.933	8.5046	8.79238	8.42358	8.10105	8.11996	8.22421	8.30741	P	P	P	P	P	P	P	noncoding	ENST00000449709	RP11-295O23.4	Ensembl	577	chr10	-	118198979	118199556	CTATAAGTCGAAAGTAAAGTTTGATGGCGCAAAGCGTCCTGCTAAAGTTGCCCGGAAAAA	intronic antisense	NM_001011709	PNLIPRP3	pancreatic lipase-related protein 3 precursor	+	118187423	118237468
ASHG19A3A025723	13556.2	16836.6	12246.1	3885.64	4800.61	4957.37	5283.57	13.5119	13.8309	13.4321	12.0323	12.3765	12.3908	12.4175	P	P	P	M	M	M	M	noncoding	uc010ijm.1	AK094144	UCSC_knowngene	3134	chr4	+	79834383	79837517	AACTTCAGTCCTCAAATATAGCTGGGAAACAATTATGAGATAGACTCAGTCTCCCCCTCC	intergenic
ASHG19A3A025660	233.324	531.084	173.995	340.482	235.359	730.672	237.923	7.90683	9	7.54155	8.39055	7.89552	9.58467	7.79246	P	P	P	P	P	P	P	noncoding	ENST00000432395	RP5-943J3.1	Ensembl	509	chr1	+	90254472	90256051	ATGAAGTTTTGCCATGAACGTAGATCCTCCCTTACAAATCCCTCCATTTTCAAACCCGAG	intergenic
ASHG19A3A025364	72.6608	48.5183	43.1214	105.033	34.1618	64.5666	30.7421	6.31583	5.76688	5.62708	6.60668	4.9929	5.92848	4.69491	P	P	P	P	P	P	P	noncoding	ENST00000515188	RP11-302F12.3	Ensembl	408	chr4	+	25610332	25621087	TTGAGAAACTCCTGAATTGTTTGCACTGAGCTGCCGGTTTCATCCAGAATTCCTGGCAAA	intergenic
ASHG19A3A019456	62.3298	73.8568	35.5591	125.744	57.6665	73.2131	47.355	6.09007	6.33515	5.35738	6.87519	5.78553	6.11544	5.35426	P	P	P	P	P	P	P	noncoding	ENST00000481698	AC000095.8	Ensembl	905	chr22	-	19019076	19022077	AATGGACACTGATCCTCAGAACCACCTGGAGATTTGGGAGGCTGGGCTGCTGTTGCCTGT	intergenic
ASHG19A3A008456	60.6715	57.3473	42.7789	65.5329	33.6919	58.8835	53.9153	6.05018	5.99131	5.61732	5.89763	4.97098	5.78525	5.54917	P	P	P	P	P	P	P	noncoding	uc010wjv.1	LRRC37A2	UCSC_knowngene	1355	chr17	-	43616528	43629863	AGAAATCTGATTATAACAATAGCTCCATCCCTAAATGAGGTGAATCTTGGAATCTCTTCC	intergenic
CUST_425_PI426073487	219.739	231.277	166.911	289.521	150.843	245.547	170.021	7.82339	7.88982	7.48277	8.13943	7.221	7.93126	7.27371	P	P	P	P	P	P	P	noncoding	uc.427+	uc.427	UCR	215	chr18	+	24237198	24237413	GTCAGATCTTACCTGAAACATTGAAGCACAAAGTCTCTCTCCAAGTCCCCTTTTCCTTTT	intergenic
ASHG19A3A032017	680.113	610.999	612.89	110.444	146.16	161.125	127.138	9.34128	9.19465	9.24438	6.67751	7.17438	7.29153	6.83392	P	P	P	P	P	P	P	noncoding	ENST00000392497	AL139098.3	Ensembl	249	chr6	+	121729687	121729940	AAAGCTGATTCTGGCAAGGAGGGGAATAACCTTCCAGAAAATGCAGATGCCAAAACAGAC	intergenic
ASHG19A3A025486	147.923	133.426	127.329	320.794	96.2009	144.511	152.666	7.28422	7.14436	7.11729	8.29723	6.54561	7.12374	7.11846	P	P	P	P	P	P	P	noncoding	AK094991		misc_RNA	2342	chr4	+	47430468	47432807	GTAAATTCTGTACATAGTTCATTGACCCTGTTGTGTGGTGGTCCTCAGCTTTGGGTGGAT	intergenic
ASHG19A3A054205	2495.16	2419.83	1995.24	3216.69	4141.39	4227.96	4532.28	11.1373	11.1015	10.8768	11.7594	12.1632	12.1663	12.1975	P	P	P	P	P	P	P	noncoding	AK096317		NRED	1993	chr16	+	2694129	2696122	TTTAAAAGCACTTTTAAGCATCAATTGTGAAATAAAAAGCCCGAGCAAAAGCCCTCTTTG
ASHG19A3A033232	122.101	111.914	120.593	43.1687	20.1822	28.4397	23.81	7.02799	6.90583	7.04383	5.26684	4.20912	4.69793	4.3038	P	P	P	P	P	P	P	noncoding	ENST00000455459	GS1-259H13.7	Ensembl	526	chr7	-	99235864	99236390	AGTGACTTACAAAAATGTCAAGTTCAACATATGGGATGTGGGTGGCCAGGACAAGATCCG	intergenic
ASHG19A3L0002168	283.842	258.613	247.072	400.061	410.679	400.171	396.511	8.161	8.03511	8.00802	8.63512	8.72743	8.66346	8.56284	P	P	P	P	P	P	P	noncoding	AK074467		misc_RNA	2310	chr8	+	95999108	96001394	AGTTTCATTCCCTATTCAAAAATGTCTTAGGCAAATGTGTGGGAATGAACATGCACTTTA	intergenic
ASHG19A3A023231	200.828	207.213	178.198	83.0758	75.6309	69.0633	54.808	7.70752	7.74435	7.57737	6.26243	6.18806	6.02735	5.57405	P	P	P	P	P	P	P	noncoding	uc001czn.2	BC042048	UCSC_knowngene	526	chr1	+	60238466	60254499	CACCCAAGATGTCCGGCTGAAGTTCTTAACCATTACCTTACACTAATCAACAGCAACAAT	intergenic
ASHG19A3A008104	280.178	263.663	315.492	621.709	405.631	420.304	351.654	8.14177	8.06105	8.35034	9.31409	8.70664	8.73463	8.37882	P	P	P	P	P	P	P	noncoding	HIT000389890		H-invDB	326	chr17	-	26700694	26701019	TTTTAACCTTGAGATATAGCAGTACTGTTTGCATCTTGCAACCCTCCTCTCCTTGGGCTG	intronic antisense	NM_015077	SARM1	sterile alpha and TIR motif-containing protein	+	26698986	26728065
ASHG19A3A052171	2670.41	2529.43	2365.33	254.065	391.357	395.566	394.688	11.2236	11.1576	11.1202	7.94125	8.65354	8.64166	8.55309	P	P	P	P	P	M	M	noncoding	uc002ade.1	AK055370	UCSC_knowngene	3748	chr15	-	55831081	55834829	GTTGTTTATCAGTATATAGACCTACCATTAGTAGAAATGATGTATGGCAGGCTTTCTTGA	intergenic
ASHG19A3H0000174	42.0207	38.8736	31.651	65.3626	25.7544	19.1036	13.8413	5.53646	5.47362	5.19871	5.89383	4.56553	4.09066	3.42643	P	P	P	A	P	M	M	noncoding	nc-HOXD12-3-	nc-HOXD12-3	HOX cluster	858	chr2	+	176959802	176960660	TATTTGTTCATTCCCAGCACTGATTATCTTCATAATCCATTAGGACAGAATGGTTTTCAG	exon sense-overlapping	NM_000523	HOXD13	homeobox protein Hox-D13	+	176957531	176960666
ASHG19A3A051854	626.687	606.84	599.337	1098.99	509.449	497.312	434.304	9.23452	9.18383	9.21193	10.1821	9.07623	9.00196	8.69942	P	P	P	P	P	P	P	noncoding	NR_024396	MGC23270	RefSeq_NR	2518	chr14	+	105287537	105290055	AGCATTTTCATGGATTACAAATGTCTTAGCCCCTGCCCTTTCAAGCAGTTCCTTAGCTCC	intergenic
ASHG19A3A014035	75.2824	80.3882	72.5991	58.0083	52.9053	35.2817	57.6637	6.36492	6.44972	6.34397	5.71369	5.64842	5.01983	5.65084	P	P	P	P	P	P	P	noncoding	BC018776		misc_RNA	1612	chr2	-	96190857	96192450	ATGGTCTTCAGTGCCTACTGAGAAGGGTTCCTGGACATCATCAGGTATGAAAACCTCAAA	intergenic
ASHG19A3A047181	66.9689	61.3768	59.4483	169.948	56.3894	38.7894	38.1835	6.19579	6.08145	6.06655	7.33039	5.74767	5.16525	5.02697	P	P	P	P	P	P	P	noncoding	ENST00000415549	RP4-650F12.4	Ensembl	382	chr1	-	74832266	74844486	GACATTTTCCTATGTACCTTGCATCCAACTGTGGCCTTGCGACATATTTTCATGAAGGGA	natural antisense	NM_001199327	FPGT-TNNI3K	FPGT-TNNI3K fusion protein isoform b	+	74663895	74930609
ASHG19A3A047181	66.9689	61.3768	59.4483	169.948	56.3894	38.7894	38.1835	6.19579	6.08145	6.06655	7.33039	5.74767	5.16525	5.02697	P	P	P	P	P	P	P	noncoding	ENST00000415549	RP4-650F12.4	Ensembl	382	chr1	-	74832266	74844486	GACATTTTCCTATGTACCTTGCATCCAACTGTGGCCTTGCGACATATTTTCATGAAGGGA	natural antisense	NM_015978	TNNI3K	serine/threonine-protein kinase TNNI3K	+	74701070	75010116
ASHG19A3A047181	66.9689	61.3768	59.4483	169.948	56.3894	38.7894	38.1835	6.19579	6.08145	6.06655	7.33039	5.74767	5.16525	5.02697	P	P	P	P	P	P	P	noncoding	ENST00000415549	RP4-650F12.4	Ensembl	382	chr1	-	74832266	74844486	GACATTTTCCTATGTACCTTGCATCCAACTGTGGCCTTGCGACATATTTTCATGAAGGGA	natural antisense	NM_001112808	FPGT-TNNI3K	FPGT-TNNI3K fusion protein isoform a	+	74663895	75010116
ASHG19A3A048496	1147.13	1158.88	1044.89	1389.54	1236.32	1367.06	1466.91	10.0421	10.0645	9.96845	10.5351	10.3909	10.5218	10.5576	P	P	P	P	P	P	P	noncoding	AL117598		misc_RNA	2367	chr12	+	32534219	32536566	CCAGAAGCCAATATATCGATTCTTATATCTCGGTTTATGTTACCAACTGAATATGGTGTA	intergenic
ASHG19A3A046621	40.5896	27.5549	32.7718	44.96	26.0673	38.7842	43.7726	5.48643	5.01622	5.24457	5.33492	4.58367	5.16498	5.23736	P	P	P	P	M	M	P	noncoding	ENST00000416342	RP4-537K17.2	Ensembl	429	chr1	-	62580419	62584681	GATCTACCTACCTACATTTTTGGTGCAAACTATTACTTTGGGGACATCTTTCTTTTTTCC	intronic antisense	NM_176877	INADL	inaD-like protein	+	62208148	62629591
ASHG19A3L0002373	15.0856	7.92804	10.8699	24.456	17.2854	23.1387	19.0826	4.08568	3.52407	3.73231	4.41022	3.96564	4.38622	3.94859	A	A	A	P	P	P	P	noncoding	AL133825	lincRNA-KCND3-1	lincRNA	817	chr1	-	112677638	112678462	TCACAACTGATCTTTAACATCAGAACTGCGTGTATTAATGGCCCGGCTCACTTGTGAATG	intergenic
ASHG19A3A020270	65.9356	51.6227	72.5737	128.426	113.651	109.776	137.414	6.1735	5.85256	6.34335	6.90296	6.79461	6.70913	6.95918	P	P	P	P	P	P	P	noncoding	ENST00000437071	CTA-211A9.5	Ensembl	1006	chr22	+	27068767	27176170	TTTGCTGCAAGAGGATGGAAAGGATCACTGTGATTTTGTTTTTCTCCTGCTGCTCTGTCT	intergenic
ASHG19A3A022416	166588	159235	149873	98114.8	121160	117344	117038	17.0873	17.0841	17.0516	16.8203	17.0246	16.9659	16.9401	P	P	P	P	P	P	P	noncoding	ENST00000396544	AC104306.1	Ensembl	369	chr3	+	32549446	32549817	ACCTATGTACCGGTTACCACTTTCAAAAATCTACAGACAGTCAATGTGGATGAGAACTAA	intergenic
ASHG19A3A009319	172.914	157.426	167.995	128.202	128.931	110.882	129.685	7.49926	7.36792	7.49238	6.90062	6.98778	6.72244	6.8625	P	P	P	P	P	P	P	noncoding	BC033139		misc_RNA	1079	chr17	+	27078189	27079232	TCAAATTGACTTACTTATCTAGGGAGAAATGGGGCCCTCCTGCCTAGGTGAGAAACTAGA	intergenic
ASHG19A3A009606	3586.69	3348.61	3149.88	1017.21	1018.51	779.116	1066.28	11.6405	11.5561	11.5229	10.0621	10.1112	9.67611	10.0789	P	P	P	P	P	P	P	noncoding	ENST00000514828	AC091132.1	Ensembl	429	chr17	+	43594141	43594671	ATGCCAAGATGAGTTTGTCAGTATAGCCGTATCCTGGAACTTCTTTTGTGAGCTAAAAAA	intergenic
ASHG19A3A018478	16.2931	8.23115	15.7038	16.4032	28.256	20.886	19.0828	4.18933	3.56369	4.23566	3.79173	4.71061	4.2281	3.94877	A	A	A	P	P	P	P	noncoding	ENST00000434176	RP5-843L14.1	Ensembl	698	chr20	+	55152618	55171182	TTGCTGGAAATACCCCAGCCCTGAAGGTTGCTGGCAAAACCACCATTTAATTCAGAACAA	intergenic
ASHG19A3A033062	65.6127	63.3122	57.4614	53.2922	78.8272	59.55	79.3809	6.16566	6.12489	6.02082	5.59097	6.24878	5.80136	6.13141	P	P	P	P	P	P	M	noncoding	ENST00000434531	AC005522.7	Ensembl	453	chr7	-	76601995	76606278	CAACATTTAGTAACCAACATCAAATGTACTTGTCTCTCCTAAGCTGCACAGACTGCCAAG	intergenic
ASHG19A3L0000880	29.8354	30.3226	38.214	31.2008	43.0012	27.7817	47.998	5.06279	5.13979	5.46104	4.78343	5.3388	4.6624	5.37329	P	P	P	P	P	P	P	noncoding	AA054416	lincRNA-WDR59-2	lincRNA	282	chr16	+	74821102	74821380	AAGAAAAGGGAGGACTACAGATGGGTATATACTACTCCAGCAATCCCAGAGTCTCTGCTT	intergenic
ASHG19A3L0002396	30.1531	21.8251	23.992	20.0292	29.3914	20.2735	30.1695	5.07488	4.71278	4.81155	4.10371	4.77023	4.18279	4.66655	A	P	P	P	P	P	P	noncoding	EH335967	lincRNA-LMO4-1	lincRNA	66	chr1	-	88065357	88065423	CATGCATACTTGCATAGTTTAATGGATCTTACATTCTTGAATTAGCCTCCATTCCTTCAA	intergenic
ASHG19A3A024460	37.3262	24.3799	23.8122	18.9919	57.22	22.8034	63.1037	5.37284	4.85579	4.79999	4.02393	5.77276	4.36519	5.78544	A	P	P	P	P	P	P	noncoding	G36546		misc_RNA	406	chr4	-	88009040	88009446	CACCAAAGAGAGCTTCCTGCTGTTTTATTTACTTGGTAATACTTTAAGGCACAGAACCAT	intronic antisense	NM_005935	AFF1	AF4/FMR2 family member 1 isoform 2	+	87928152	88062191
ASHG19A3A024460	37.3262	24.3799	23.8122	18.9919	57.22	22.8034	63.1037	5.37284	4.85579	4.79999	4.02393	5.77276	4.36519	5.78544	A	P	P	P	P	P	P	noncoding	G36546		misc_RNA	406	chr4	-	88009040	88009446	CACCAAAGAGAGCTTCCTGCTGTTTTATTTACTTGGTAATACTTTAAGGCACAGAACCAT	intronic antisense	NM_001166693	AFF1	AF4/FMR2 family member 1 isoform 1	+	87856153	88062206
ASHG19A3A008074	19.54	7.07091	17.3196	18.2583	34.9931	36.1574	29.5469	4.45687	3.40228	4.3642	3.96395	5.03116	5.05863	4.63784	A	P	A	P	P	P	P	noncoding	ENST00000432861	AC087499.9	Ensembl	149	chr17	-	20512774	20512923	TGGCCTGGAACCTCAACAGCAGGATTGGGATGAGGATGGAAGTGTACAGATATGCATATA	intergenic
ASHG19A3A035657	3097.45	3021.87	2871.12	2058.85	1952.34	1937.51	2250.67	11.4409	11.4116	11.3955	11.1034	11.0594	11.0263	11.1798	P	P	P	P	P	P	P	noncoding	BC012900		misc_RNA	2118	chr8	-	29190579	29192682	CATCTTTCAGAGTGATACCATTTCTACATTTGATAATGCCTGTATTCCTGTAGGATGTAT	exon sense-overlapping	NM_001394	DUSP4	dual specificity protein phosphatase 4 isoform	-	29190578	29208267
ASHG19A3A035657	3097.45	3021.87	2871.12	2058.85	1952.34	1937.51	2250.67	11.4409	11.4116	11.3955	11.1034	11.0594	11.0263	11.1798	P	P	P	P	P	P	P	noncoding	BC012900		misc_RNA	2118	chr8	-	29190579	29192682	CATCTTTCAGAGTGATACCATTTCTACATTTGATAATGCCTGTATTCCTGTAGGATGTAT	exon sense-overlapping	NM_057158	DUSP4	dual specificity protein phosphatase 4 isoform	-	29190578	29206322
ASHG19A3A043812	134.573	123.689	124.376	217.921	156.22	104.295	187.755	7.15908	7.04142	7.08735	7.70132	7.27572	6.63338	7.42562	P	P	P	P	P	P	P	noncoding	ENST00000425494	RP11-175J10.1	Ensembl	1454	chr10	+	37811938	37833629	TTGAATGTTCCAGTGCTCCCATGTCTACCATAAATCATGCGTTTTCATCCTCAGAAGCAG	intergenic
ASHG19A3A012736	91.4624	77.6322	81.4425	79.4142	108.908	50.8211	140.112	6.63126	6.4036	6.50632	6.19446	6.72928	5.56593	6.98565	P	P	P	P	P	P	P	noncoding	ENST00000424872	RP11-293G6__B.6	Ensembl	1797	chr1	-	235701348	235703145	TAACGAAAATAACCCCTTCCTAATTAAACACCTAACAATCAGCAGCATCTTCGCCGGATT	intergenic
ASHG19A3A046148	504.499	477.855	427.452	816.926	831.745	581.364	940.213	8.93661	8.86665	8.76053	9.73674	9.80323	9.23721	9.88631	P	P	P	P	P	P	P	noncoding	uc001mjl.1	BC014360	UCSC_knowngene	1068	chr11	+	10879805	10900820	GTGCTTTAACACCAAATCTGAAAATTGTTCAGAAGAGAAACATTGAGCATGAACACCATC	bidirectional	NM_021211	ZBED5	zinc finger BED domain-containing protein 5	-	10874250	10879620
ASHG19A3A046148	504.499	477.855	427.452	816.926	831.745	581.364	940.213	8.93661	8.86665	8.76053	9.73674	9.80323	9.23721	9.88631	P	P	P	P	P	P	P	noncoding	uc001mjl.1	BC014360	UCSC_knowngene	1068	chr11	+	10879805	10900820	GTGCTTTAACACCAAATCTGAAAATTGTTCAGAAGAGAAACATTGAGCATGAACACCATC	bidirectional	NM_001143667	ZBED5	zinc finger BED domain-containing protein 5	-	10874250	10879620
ASHG19A3A051214	33.3964	29.978	37.4306	28.1184	27.1077	22.9708	36.1619	5.21965	5.1256	5.43221	4.62589	4.6448	4.37496	4.94867	P	P	P	P	P	P	P	noncoding	ENST00000413906	AB019437.56	Ensembl	946	chr14	-	107139421	107140367	CAATCTTTATTTCTGGAATTATCAGTGCTGCCATCTTGGCTGACTTCAAGTATGTCATCC	intergenic
ASHG19A3A000132	117.454	78.4942	97.6951	106.775	129.002	98.0686	110.81	6.97516	6.41856	6.75491	6.62902	6.98856	6.54199	6.62773	P	M	P	P	P	P	P	noncoding	ENST00000419303	PRAMEL	Ensembl	1869	chr22	-	22345495	22398256	GAACAGAGGAGGCAGGCACAGAGAGGTCCATGGAGGTGAACCACCCAGCACCCCTCAGCC	intergenic
ASHG19A3A031015	27119.8	27351.3	24483	31580.6	31644.7	24082.2	33232.3	14.4798	14.5303	14.3923	15.1618	15.1341	14.7212	15.1218	P	M	M	P	P	P	P	noncoding	ENST00000397300	RP11-401E14.1	Ensembl	534	chr6	+	15935012	15935548	AAACCCAGCAAGTGGTGGGCTTGCTTTGTGAAGAGACAGTTCATGAACAAGAGTCTTTCA	intergenic
ASHG19A3A039449	2390.1	2426.19	2134.67	3575.03	3968.64	3181.09	4228.66	11.0758	11.1045	10.9688	11.9154	12.1085	11.7521	12.0994	P	P	P	P	P	P	P	noncoding	AK021425		misc_RNA	1832	chr1	+	210417766	210419598	GATGGTTTAAACTAGGTGCAGAACTGTCCCATGAAGAGAAGAATGATATCAGTATTTAAA	intergenic
ASHG19A3A031531	1568.05	1676.89	1530.09	2511.63	2581.06	2714.12	2783.35	10.4702	10.5657	10.4961	11.3975	11.4743	11.5159	11.4893	P	P	P	P	P	M	P	noncoding	AK096036		misc_RNA	2642	chr6	+	42750664	42753300	ACATACAGGCTTCTAGGTCTAGCCAGGCCATCTAGTTTAGTCAAGACAGCTGTGTAACAA	intergenic
ASHG19A3A020110	45.5841	47.9893	45.4133	14.1513	12.8123	13.843	12.8579	5.65509	5.75467	5.69949	3.5564	3.48574	3.56911	3.29747	P	P	P	A	A	P	P	noncoding	ENST00000438948	XXbac-B444P24.10	Ensembl	1240	chr22	+	20287282	20300739	AAGTGTCGCAAAGATGGGCATCGCATCCAGGGCTGAGATTGAGGACTGGTTCACGGCAGA	intergenic
CUST_4_PI426073487	43.2588	54.1707	34.4202	38.0874	47.0611	42.2047	55.7128	5.57918	5.91177	5.31059	5.08223	5.4756	5.29087	5.59861	P	P	P	P	M	P	M	noncoding	uc.4+	uc.4	UCR	359	chr1	+	10758248	10758607	GGGTCCCGGTAATCAAATAAAATTGAAAATCATCTTCCCATTAAATTCAATTAGCCGCAA	intronic antisense	NM_017766	CASZ1	zinc finger protein castor homolog 1 isoform b	-	10707269	10856707
CUST_4_PI426073487	43.2588	54.1707	34.4202	38.0874	47.0611	42.2047	55.7128	5.57918	5.91177	5.31059	5.08223	5.4756	5.29087	5.59861	P	P	P	P	M	P	M	noncoding	uc.4+	uc.4	UCR	359	chr1	+	10758248	10758607	GGGTCCCGGTAATCAAATAAAATTGAAAATCATCTTCCCATTAAATTCAATTAGCCGCAA	intronic antisense	NM_001079843	CASZ1	zinc finger protein castor homolog 1 isoform a	-	10696665	10856707
ASHG19A3L0003286	9.73255	14.9936	12.5185	19.0635	18.9215	14.9265	19.935	3.48639	4.24885	3.91991	4.02982	4.1148	3.69568	4.01914	A	A	A	P	P	P	M	noncoding	BG984660	lincRNA-FAM43A-3	lincRNA	594	chr3	-	194508737	194509302	ACAGGAACCATGAGATGGGACAAAAACCCTCTCTGGATTCCAGGAAACTCCTGTACTAAA	intergenic
ASHG19A3A013676	38.4661	32.4989	39.0702	25.5339	52.2591	45.1105	48.4995	5.41342	5.2369	5.4924	4.47926	5.63097	5.39128	5.38807	P	P	P	P	P	M	M	noncoding	AK093610		misc_RNA	2514	chr2	-	60245851	60248365	GTGGTGCTGGCCATTTTTCAAAAGCAAATGTAACTTCTTTCTGGAGGATAATTTTATACT	intergenic
ASHG19A3A021314	53.0154	46.854	46.3495	69.7964	73.9759	74.3106	90.6744	5.86569	5.72316	5.72745	5.99592	6.15276	6.13567	6.32233	P	P	P	P	P	P	P	noncoding	BC018424		RNAdb	3519	chr3	-	88185088	88188592	GCACAACCACATATTTCAACACAAATTTGCAAGCCTTCTTCTTCAACCTGTAAAAAGAAA	natural antisense	NM_018293	ZNF654	zinc finger protein 654	+	88188261	88193814
ASHG19A3A021314	53.0154	46.854	46.3495	69.7964	73.9759	74.3106	90.6744	5.86569	5.72316	5.72745	5.99592	6.15276	6.13567	6.32233	P	P	P	P	P	P	P	noncoding	BC018424		RNAdb	3519	chr3	-	88185088	88188592	GCACAACCACATATTTCAACACAAATTTGCAAGCCTTCTTCTTCAACCTGTAAAAAGAAA	intron sense-overlapping	NM_001195308	CGGBP1	CGG triplet repeat-binding protein 1	-	88101099	88199016
ASHG19A3A029186	12035.6	13615.4	11634.2	4503.98	5582.02	5541.47	5836.19	13.346	13.5344	13.3546	12.2567	12.6167	12.5669	12.5688	P	P	P	P	P	P	P	noncoding	ENST00000514034	CTC-251I16.1	Ensembl	1154	chr5	+	175136605	175137759	GTGGGACCCCAAATCCATGTTTGTGTTACCATCGTGTTCCAATAAAACTATCGAAACAGA	intergenic
ASHG19A3A027828	97.8518	127.37	81.889	82.2845	119.03	136.389	134.673	6.72804	7.08136	6.51436	6.24921	6.86371	7.03502	6.92407	P	P	P	P	P	P	P	noncoding	ENST00000507432	AC138035.2	Ensembl	2386	chr5	-	180756043	180758857	TTTCCTCCCAATGGATCCTGCCACCTTCTGGTGCAAGAGACCTGAAAGTGTGGGCGACCT	intergenic
ASHG19A3A019678	13.5739	18.5107	15.8456	15.3996	24.2755	25.9856	36.2575	3.93839	4.51139	4.24932	3.69286	4.47812	4.56167	4.95311	A	A	A	P	P	P	P	noncoding	NR_001580	SDC4P	RefSeq_NR	467	chr22	-	30877276	30877743	CTGAGCAGGAAGCCCATCTACAAAAAAGCCCCTAGCAAGGAGTTATTACGCTTCTTCTAT	intergenic
ASHG19A3A051349	91398.2	101257	79194.4	61618.1	72113.1	45292.7	66649.8	16.2066	16.3881	16.0944	16.123	16.3255	15.6582	16.1432	P	P	P	P	P	P	P	noncoding	ENST00000480072	RP11-829H16.1	Ensembl	201	chr14	+	31288919	31289120	AAGTTTGAAAAGAGGTACAAGACAGGCAAGAACAAGTGGTTCTTCCAGGACCTAGATTTT	intergenic
ASHG19A3A040937	3650.35	4284.58	3603.33	4661.08	3926.51	4170.7	4296.6	11.665	11.9177	11.7218	12.315	12.0917	12.1454	12.1222	P	P	P	P	P	P	M	noncoding	ENST00000453735	RP11-344N17.6	Ensembl	523	chrX	+	48166203	48168490	AAATGTCAGACCTGATATAGTCCTCCTTGGAAAGGCCTTTTCTGAGGGCTGATACTCTGT	intergenic
ASHG19A3A039520	180643	194899	159295	153006	149008	117592	143624	17.2032	17.414	17.1366	17.3776	17.3343	16.9724	17.2564	P	P	P	P	P	P	P	noncoding	HIT000195205		H-invDB	337	chrM	+	15552	15888	ACAATCCTAATCCTAATACCAACTATCTCCCTAATTGAAAACAAAATACTCAAATGGGCC	intergenic
ASHG19A3L0001450	96.9363	141.061	72.4218	73.1657	203.87	189.669	255.434	6.71662	7.22164	6.33973	6.06486	7.67495	7.53632	7.90185	P	P	P	P	P	P	P	noncoding	chr4:114709776-114720551-	lincRNA-CAMK2D	lincRNA	10776	chr4	-	114709776	114720551	CTCTTGTCTGTCTCTGAATTCACCCTCATATTAATCAGAATCACTTTATTCCTAGAGTAT	intergenic
ASHG19A3A053011	7083.19	8643.95	5165.08	3513.7	3475.73	3954.46	4198.44	12.5944	12.9031	12.2216	11.8889	11.9	12.067	12.0876	P	P	P	P	P	P	P	noncoding	ENST00000395459	AC107871.1	Ensembl	270	chr15	+	68546970	68547242	AATGGAGATGCCCAAACAGACCAGACACAGAAAGCTGAAGGTGCTGCAGATGCCAAGTGA	intergenic
ASHG19A3A037409	156.97	133.087	136.131	259.33	241.11	211.354	224.77	7.36706	7.14136	7.20886	7.97646	7.93423	7.69866	7.69825	P	P	P	P	M	M	M	noncoding	uc004acs.2	DQ587119	UCSC_knowngene	4111	chr9	-	43027663	43031774	ATCTGCATATAACGTGGTCCTGAATTTCTGGCTGGGAAGTGCTTCCAGGGTTTCATATGT	intergenic
ASHG19A3A023441	41.3379	264.074	30.1858	64.8223	55.3491	231.802	56.7409	5.5121	8.06304	5.13685	5.88201	5.72056	7.84045	5.6275	P	P	P	P	P	P	P	noncoding	ENST00000487238	RP11-550I24.2	Ensembl	483	chr3	+	156893057	157099054	TCAAGTTAAACCTTTAAGCTGTTCATTTCCTAAAAGGGTGAAAACGCGGGCACCCCTCGA	natural antisense	NM_024621	VEPH1	ventricular zone-expressed PH domain-containing	-	156977531	157217445
ASHG19A3A023441	41.3379	264.074	30.1858	64.8223	55.3491	231.802	56.7409	5.5121	8.06304	5.13685	5.88201	5.72056	7.84045	5.6275	P	P	P	P	P	P	P	noncoding	ENST00000487238	RP11-550I24.2	Ensembl	483	chr3	+	156893057	157099054	TCAAGTTAAACCTTTAAGCTGTTCATTTCCTAAAAGGGTGAAAACGCGGGCACCCCTCGA	natural antisense	NM_001167911	VEPH1	ventricular zone-expressed PH domain-containing	-	156977531	157221136
ASHG19A3A023441	41.3379	264.074	30.1858	64.8223	55.3491	231.802	56.7409	5.5121	8.06304	5.13685	5.88201	5.72056	7.84045	5.6275	P	P	P	P	P	P	P	noncoding	ENST00000487238	RP11-550I24.2	Ensembl	483	chr3	+	156893057	157099054	TCAAGTTAAACCTTTAAGCTGTTCATTTCCTAAAAGGGTGAAAACGCGGGCACCCCTCGA	natural antisense	NM_001167912	VEPH1	ventricular zone-expressed PH domain-containing	-	156977531	157221136
ASHG19A3A037657	37.7275	248.972	23.279	24.9594	7.02311	85.3334	5	5.38654	7.98497	4.77023	4.44249	2.67382	6.33274	2.32841	P	P	P	A	A	P	P	noncoding	uc004apb.1	BC093087	UCSC_knowngene	1692	chr9	-	89834787	89880410	ACTTCTGCTGGTGTCAATCATTGGGACTGGATTATGTCTAAGCATCTTCAACCTCACAGG	intergenic
ASHG19A3A027169	58.7621	106.392	48.9957	92.7019	64.5334	112.833	67.902	6.0092	6.83661	5.80292	6.42608	5.95264	6.74722	5.89383	P	P	P	P	P	P	P	noncoding	AL117590		misc_RNA	2951	chr5	-	98128557	98131470	TCCAAAATGGACCCAACTGCTTGCACCTCAAAAATGGATATCACTTTCAGAAAATATTTT	natural antisense	NM_001012761	RGMB	RGM domain family member B	+	98104998	98132198
ASHG19A3A013545	992.666	701.569	822.806	511.437	543.019	425.466	536.948	9.85145	9.37765	9.65039	9.02416	9.16624	8.75654	9.03197	P	P	P	P	P	P	P	noncoding	AK126362		misc_RNA	2241	chr2	-	42558384	42560624	GCCCAAAAGAGTAGGATAGCCACATTAGACTTACAAGACTTACAGCAACTCCACCAGAAA	natural antisense	NM_001145076	EML4	echinoderm microtubule-associated protein-like 4	+	42396489	42559688
ASHG19A3A013545	992.666	701.569	822.806	511.437	543.019	425.466	536.948	9.85145	9.37765	9.65039	9.02416	9.16624	8.75654	9.03197	P	P	P	P	P	P	P	noncoding	AK126362		misc_RNA	2241	chr2	-	42558384	42560624	GCCCAAAAGAGTAGGATAGCCACATTAGACTTACAAGACTTACAGCAACTCCACCAGAAA	natural antisense	NM_019063	EML4	echinoderm microtubule-associated protein-like 4	+	42396489	42559688
ASHG19A3A053500	52266.7	52164.5	36129.9	60211.3	60402.2	62586.4	57768.1	15.4053	15.4459	14.9671	16.0839	16.0517	16.0944	15.9281	P	P	P	P	P	P	P	noncoding	ENST00000463867	CTD-2135D7.1	Ensembl	348	chr16	-	14016188	14016536	TGTGCAATTCACAACAAAGTAGTCAGGAATCGATCTTGTGAAGCCTGCAAGGACCGAACA	intronic antisense	NM_005236	ERCC4	DNA repair endonuclease XPF	+	14014013	14046205
ASHG19A3A051990	218.185	185.639	162.048	342.271	294.727	348.81	309.501	7.8128	7.59131	7.44394	8.39892	8.23398	8.45077	8.19142	P	P	P	P	P	P	P	noncoding	AK022275		misc_RNA	1882	chr15	-	35619557	35621439	AGGGGCTGCTCACTCTAAAGTTACTCAAAATACTCTATTTATCTAACAAAGCATGGGCTT	intergenic
CUST_700_PI426073487	26.6878	17.7728	20.1772	43.9259	8.36225	40.8002	17.9214	4.90901	4.45975	4.58169	5.29886	2.86943	5.23671	3.8553	A	P	P	P	A	P	P	noncoding	uc.221-	uc.221	UCR	349	chr7	-	96641300	96641649	TTAAATTGTCCCCAATGTCTGCTTCAAATTGGATGGCACTGCAGCTGGAGGCTTTGTTCA	intergenic
ASHG19A3A021947	12.697	12.4668	12.3718	24.6839	21.0975	15.6132	25.0948	3.84755	4.02882	3.9027	4.42513	4.27557	3.76588	4.38712	A	A	A	P	P	P	P	noncoding	ENST00000423873	RP11-639B4.1	Ensembl	815	chr3	-	173628287	173638586	ATAAAATCTTGTGCTCCATTCAAGTACAGGCACATCTTCTAAGGAACACCACCACACAAA	intronic antisense	NM_014932	NLGN1	neuroligin-1	+	173116243	174001116
ASHG19A3A012126	36.6813	17.8694	25.723	70.2345	65.068	72.544	63.3029	5.3498	4.46799	4.91314	6.00438	5.96385	6.1024	5.78965	A	P	P	P	P	P	P	noncoding	AK128447		misc_RNA	3956	chr1	-	228458143	228462098	ACAGATCTTGCAAGGGTTGATCTTTCTCAACTCTCTAATAATTTATCTTCTAGGTAAACC	natural antisense	NM_001098623	OBSCN	obscurin isoform b	+	228395860	228566575
ASHG19A3A012126	36.6813	17.8694	25.723	70.2345	65.068	72.544	63.3029	5.3498	4.46799	4.91314	6.00438	5.96385	6.1024	5.78965	A	P	P	P	P	P	P	noncoding	AK128447		misc_RNA	3956	chr1	-	228458143	228462098	ACAGATCTTGCAAGGGTTGATCTTTCTCAACTCTCTAATAATTTATCTTCTAGGTAAACC	natural antisense	NM_052843	OBSCN	obscurin isoform a	+	228395860	228548951
ASHG19A3A027931	43.9749	47.3786	44.6886	134.617	54.3943	29.7841	35.581	5.60312	5.73995	5.67842	6.97393	5.69378	4.7681	4.92349	P	P	P	P	P	P	P	noncoding	HIT000062015		H-invDB	209	chr5	+	9199553	9199761	GACCTGCAGCCACCTGTTCCAATCTGGCTTCTATCAGCAATCAAGGTAATAACTTACAAG	intronic antisense	NM_003966	SEMA5A	semaphorin-5A precursor	-	9035137	9546233
ASHG19A3A040716	44.3169	34.3907	61.705	88.2014	39.1544	25.327	44.156	5.61396	5.30856	6.1205	6.35187	5.19906	4.52196	5.25028	P	P	P	P	P	P	P	noncoding	AF086422		misc_RNA	381	chrX	+	16607671	16627697	TTCCAACTCAGCTATCCTTGGCTCTGAAAAGCTGTCATCACTGGCATCACTGTATCTATC	natural antisense	NM_019857	CTPS2	CTP synthase 2	-	16606121	16731059
ASHG19A3A040716	44.3169	34.3907	61.705	88.2014	39.1544	25.327	44.156	5.61396	5.30856	6.1205	6.35187	5.19906	4.52196	5.25028	P	P	P	P	P	P	P	noncoding	AF086422		misc_RNA	381	chrX	+	16607671	16627697	TTCCAACTCAGCTATCCTTGGCTCTGAAAAGCTGTCATCACTGGCATCACTGTATCTATC	natural antisense	NM_001144002	CTPS2	CTP synthase 2	-	16606121	16730340
ASHG19A3A040716	44.3169	34.3907	61.705	88.2014	39.1544	25.327	44.156	5.61396	5.30856	6.1205	6.35187	5.19906	4.52196	5.25028	P	P	P	P	P	P	P	noncoding	AF086422		misc_RNA	381	chrX	+	16607671	16627697	TTCCAACTCAGCTATCCTTGGCTCTGAAAAGCTGTCATCACTGGCATCACTGTATCTATC	natural antisense	NM_175859	CTPS2	CTP synthase 2	-	16606121	16730775
CUST_112_PI426075208	73.2735	65.0103	78.7895	135.85	75.6461	48.6595	49.9708	6.32849	6.16158	6.45956	6.98565	6.18849	5.50409	5.43346	P	P	P	P	P	P	P	noncoding	nc-HOXC11-110+	nc-HOXC11-110	HOX cluster	838	chr12	-	54359624	54360462	GAAAAAGAGAGAAAAGTTTCCCGGAGTCTTCATTAGTTGATTTCCCTGTCCGCCGCTTTC	intergenic
ASHG19A3A037924	349.728	315.304	270.573	229.588	216.289	191.237	200.339	8.4572	8.3053	8.13587	7.78746	7.76487	7.54737	7.52867	P	P	P	P	P	P	P	noncoding	ENST00000439875	C9orf110	Ensembl	7380	chr9	-	115865617	115873753	TAGGCACCTCCTTCCCTTAGGAAGAAGCCAAACATTTCACGAAGTCCTTCTGTGCTTTTA	intergenic
ASHG19A3A049938	309.561	249.321	257.69	67.3475	52.55	61.8947	50.1364	8.28577	7.98738	8.06882	5.93744	5.63814	5.85921	5.43785	P	P	P	P	P	P	P	noncoding	ENST00000445646	RP11-363G2.4	Ensembl	533	chr13	+	23426134	23426991	TGGTGTTGGGGGCAATAGGTTTGTGAATATTCTGTGGATATGTCCATGCATAGGTGTATA	intergenic
ASHG19A3A030636	54.472	27.7358	67.7614	77.3215	36.5053	19.505	21.1377	5.9065	5.02709	6.24654	6.152	5.09211	4.12234	4.11316	A	P	P	P	P	P	P	noncoding	ENST00000454588	RP1-45I4.3	Ensembl	552	chr6	-	143360561	143363461	GGTCCAAGTCAATCATCTTTGCTTCTCTCACATTGTCATCGACATTTACCCCAGCATTAT	intergenic
ASHG19A3L0003378	96.8942	72.3265	81.8711	120.152	45.8824	42.3098	30.4438	6.71577	6.30641	6.51409	6.80397	5.43877	5.29433	4.67992	P	P	P	P	P	P	P	noncoding	BF116112	lincRNA-C5orf53-1	lincRNA	588	chr5	-	139527790	139528378	AATGTCTGTGTCCCCTATAAACCATGACTCTACACGGTGGCATTCTAAGGATGGCAGAAT	intergenic
ASHG19A3A020928	5315.21	4371.37	4848.59	1232.61	1082.01	1145.49	993.688	12.2032	11.9441	12.1295	10.3544	10.1925	10.2619	9.97333	P	P	P	P	P	M	M	noncoding	ENST00000434712	RP11-193I22.2	Ensembl	514	chr3	-	42092672	42093186	AGCTATCAGGATCTACAACAATGACAGATATGATGAGATCTGCACTGCTGGGGAGGCAAT	intergenic
ASHG19A3A036568	300.975	302.909	277.721	202.17	165.185	141.748	157.97	8.24809	8.24694	8.17495	7.58921	7.35993	7.0925	7.16613	P	P	P	P	P	P	P	noncoding	AK026601		misc_RNA	1700	chr8	+	41685789	41687453	CACTAGGGGAGCTCATTGTCTAAGACTGCCATCCCTAACTGCCTTTTAAAAAGAAATCTG	intronic antisense	NM_001142446	ANK1	ankyrin-1 isoform 9	-	41510743	41754280
ASHG19A3A053282	124789	112598	108548	73225.6	83549.6	85342.7	83495.4	16.6363	16.5462	16.5583	16.3961	16.5212	16.543	16.4833	P	P	P	P	P	P	P	noncoding	ENST00000465747	RP11-522B15.1	Ensembl	340	chr15	+	96991383	96991723	TTTGGTTACCTATGTACCTGTTACCACGTGAAAAAATCTACAGTCAATGTGGATGAGAAC	intergenic
ASHG19A3A015223	23265.6	22859.9	21509.9	20164.3	20322.7	20680.2	20916.8	14.2655	14.2702	14.228	14.4961	14.4931	14.5122	14.4495	P	P	P	P	P	P	P	noncoding	ENST00000425872	RP3-477M7.4	Ensembl	743	chr1	+	8953467	8954210	TTGTGGTGTGGAAAAACAAATTTGTTTTTATGTCCTCTTCTCCCTTTCCATCTTTCAGCA	intergenic
ASHG19A3L0001775	43.9872	30.1331	37.1474	54.8696	29.1714	25.2616	67.3457	5.60352	5.13173	5.4203	5.63176	4.76063	4.51736	5.88146	P	P	P	P	P	P	P	noncoding	chr6:23664596-23678671+	lincRNA-NRSN1-2	lincRNA	14076	chr6	+	23664596	23678671	TCCTATGCTAAATGTCTTCCTTCACATGTGCTAACATTCTGTATTCATTGCAGGATATCA	intergenic
ASHG19A3A008649	4129.4	3879.76	3750.78	2064.37	1893.12	1996.36	2120.24	11.8482	11.7618	11.773	11.1086	11.0159	11.0664	11.0919	P	P	P	P	P	P	P	noncoding	BC040714		misc_RNA	1546	chr17	-	58118818	58120351	GAATCTTGGAACTTCCGTCTCTTGAATACATTCTTAGTAGTAGCTTCTTGGCATTTTCAA	intergenic
ASHG19A3A029808	174.464	167.948	152.081	132.819	84.9957	101.584	125.015	7.51212	7.45314	7.36121	6.9525	6.35923	6.59325	6.80961	P	P	P	P	P	P	P	noncoding	AK026168		NRED	2638	chr6	-	34247460	34250085	AGCTAAAGCAGTGACAGATCCACGTAGCCTCTTTAACCTCTTTATTATCTTGCCAAAAAA	intergenic
ASHG19A3A014717	550.319	484.966	508.295	792.507	342.261	432.842	876.003	9.05079	8.88752	8.99009	9.68548	8.45881	8.7798	9.78038	P	P	P	P	M	P	M	noncoding	AK026877		misc_RNA	1573	chr2	-	181891254	181892811	TTCACCCCTCTCTCACTTTCTGTTTCCTCAGCCTTTGGAAAGCATGTATCAAGGATTTAA	intronic antisense	NM_006357	UBE2E3	ubiquitin-conjugating enzyme E2 E3	+	181845341	181928150
ASHG19A3A014717	550.319	484.966	508.295	792.507	342.261	432.842	876.003	9.05079	8.88752	8.99009	9.68548	8.45881	8.7798	9.78038	P	P	P	P	M	P	M	noncoding	AK026877		misc_RNA	1573	chr2	-	181891254	181892811	TTCACCCCTCTCTCACTTTCTGTTTCCTCAGCCTTTGGAAAGCATGTATCAAGGATTTAA	intronic antisense	NM_182678	UBE2E3	ubiquitin-conjugating enzyme E2 E3	+	181845111	181928150
ASHG19A3A036612	5974.26	5570.91	5465.55	9579.36	10710.9	9422.82	10652	12.3703	12.2879	12.3063	13.3837	13.5761	13.3384	13.4501	P	P	P	P	P	P	P	noncoding	ENST00000471393	RP11-400K9.1	Ensembl	478	chr8	+	54445467	54446264	ACAAAGGGAAAGAGGAGAGACACCTGACCCGTGTTCTCTAGGCCTTTTAGAAGACATGGA	intergenic
ASHG19A3A053034	54.535	47.624	43.9163	45.8341	48.6457	53.7985	58.1519	5.9076	5.74669	5.65188	5.36266	5.52343	5.65535	5.66193	P	P	P	P	P	P	P	noncoding	AK022441		NRED	3537	chr15	+	71595109	71598646	TGTGAAGATAACTTTTTCCCTCAAACGATTGTAAAGAGCTTAAAGGCATTAAGATGAGAG	intron sense-overlapping	NM_024817	THSD4	thrombospondin type-1 domain-containing protein	+	71433787	72075722
ASHG19A3A041494	24.5427	8.54	16.4865	38.9879	34.6274	28.509	33.3429	4.78611	3.60153	4.30218	5.11793	5.01496	4.7009	4.81939	A	P	A	P	P	P	P	noncoding	ENST00000418891	RP5-1052M9.4	Ensembl	459	chrX	+	123466767	123467226	TCATTAACAATGAAGTCCTCATGGACGGCAGCGGCCCAGCCTTTTACGTGGCCTTCCGCT	intergenic
ASHG19A3A041484	30280.5	29029	28663.5	36045.7	36609.3	37444.3	35848.7	14.6387	14.6222	14.6431	15.3548	15.3332	15.3649	15.2341	P	P	P	P	P	P	P	noncoding	ENST00000450755	MIR220A	Ensembl	1325	chrX	+	122695492	122696817	AACATGAATGACCTGGTATCTGAGTACCAGCAGTACCAGGATGCCACAGCCGAGGAGGGC	intergenic
ASHG19A3A030207	717.06	580.737	664.371	2748.07	4033.64	3086.18	3858.77	9.41213	9.12058	9.35816	11.5287	12.1314	11.706	11.9588	P	P	P	P	P	P	P	noncoding	ENST00000454172	RP1-90L14.1	Ensembl	411	chr6	-	85130748	85265870	GCTCTGCTCTGTCCTCACCCCTCAAGAGAATTTCCCTTATTATTATGAAAACTTTTTATC	intergenic
CUST_75_PI426073487	608.199	697.306	591.05	391.663	580.587	494.698	711.677	9.19465	9.37071	9.1901	8.6017	9.26177	8.99115	9.46593	P	P	P	P	P	P	P	noncoding	uc.77+	uc.77	UCR	296	chr2	+	145185764	145186060	TTATCTTTCAAGCATCTTTGGCTGAGTTCTCCCTCATAGTTGAAAATCTAAAACCTTAAG	intronic antisense	NM_001171653	ZEB2	zinc finger E-box-binding homeobox 2 isoform 2	-	145141941	145277958
CUST_75_PI426073487	608.199	697.306	591.05	391.663	580.587	494.698	711.677	9.19465	9.37071	9.1901	8.6017	9.26177	8.99115	9.46593	P	P	P	P	P	P	P	noncoding	uc.77+	uc.77	UCR	296	chr2	+	145185764	145186060	TTATCTTTCAAGCATCTTTGGCTGAGTTCTCCCTCATAGTTGAAAATCTAAAACCTTAAG	intronic antisense	NM_014795	ZEB2	zinc finger E-box-binding homeobox 2 isoform 1	-	145141941	145277958
ASHG19A3A036543	166.35	149.494	150.217	149.498	152.956	156.061	165.176	7.44985	7.29717	7.34443	7.13048	7.24385	7.24354	7.231	P	P	P	P	P	P	P	noncoding	BC015455		misc_RNA	923	chr8	+	37920398	37921304	CAAAGAGCTTACAACCTGATCAGGAGACGAGAAGTATTCCAAGTAGTAAATGGTCATTGG	intergenic
CUST_121_PI426075208	15.5082	14.3802	13.4413	20.787	18.5383	14.8938	18.6771	4.12297	4.19944	4.01509	4.15965	4.07941	3.69236	3.91736	A	A	A	P	P	P	P	noncoding	nc-HOXC12-105+	nc-HOXC12-105	HOX cluster	188	chr12	-	54348466	54348654	GGGGTGAGTGGGGTAACAAAGGGCGGGGGCAGGTTTATTTGCTGAACTGATTTTCTAAAA	bidirectional	NM_173860	HOXC12	homeobox protein Hox-C12	+	54348713	54350350
ASHG19A3A035847	104.013	99.5362	93.0367	78.5304	113.556	88.5817	123.623	6.81275	6.7474	6.68599	6.17655	6.79253	6.38813	6.79577	P	P	P	P	P	P	P	noncoding	ENST00000500152	AL359853.1	Ensembl	1760	chr1	+	179836661	179846917	TTAAATCGTAAAACTGTTAGTATCAGGAGAGCCCTTCGAGTATTCTCTCCGCTCCACACC	natural antisense	NM_145034	TOR1AIP2	torsin-1A-interacting protein 2 isoform b	-	179809101	179846941
ASHG19A3A035847	104.013	99.5362	93.0367	78.5304	113.556	88.5817	123.623	6.81275	6.7474	6.68599	6.17655	6.79253	6.38813	6.79577	P	P	P	P	P	P	P	noncoding	ENST00000500152	AL359853.1	Ensembl	1760	chr1	+	179836661	179846917	TTAAATCGTAAAACTGTTAGTATCAGGAGAGCCCTTCGAGTATTCTCTCCGCTCCACACC	natural antisense	NM_022347	TOR1AIP2	interferon alpha responsive protein isoform a	-	179828164	179846941
ASHG19A3A035847	104.013	99.5362	93.0367	78.5304	113.556	88.5817	123.623	6.81275	6.7474	6.68599	6.17655	6.79253	6.38813	6.79577	P	P	P	P	P	P	P	noncoding	ENST00000500152	AL359853.1	Ensembl	1760	chr1	+	179836661	179846917	TTAAATCGTAAAACTGTTAGTATCAGGAGAGCCCTTCGAGTATTCTCTCCGCTCCACACC	natural antisense	NM_001199260	TOR1AIP2	torsin-1A-interacting protein 2 isoform b	-	179809101	179846941
ASHG19A3L0001950	14.0027	5.76761	16.242	18.3018	21.762	17.1786	26.7973	3.98609	2.96274	4.28277	3.96668	4.31799	3.92237	4.48208	A	A	A	P	P	P	P	noncoding	BX507538	lincRNA-ZFPM2-1	lincRNA	598	chr8	+	105608325	105608916	GGGCTTTTTATAGCCTCAGTTGCCTTATGTGACCTATAAGTTGGATACTACTTATTTTAT	intergenic
ASHG19A3L0001145	81.5859	62.3112	85.2071	72.0713	145.419	83.5426	167.018	6.47782	6.10384	6.57145	6.04223	7.16869	6.29947	7.24683	P	P	P	P	P	P	P	noncoding	AI760638	lincRNA-PTH2R-1	lincRNA	500	chr2	-	209407667	209689050	GCAATTCTCTTGTCCTTCTCATGGTGTCAAGCTGGCTGTAGCAGGTATCTTATCCATACA	intergenic
ASHG19A3A034053	194.167	172.039	194.002	154.622	272.407	146.289	310.98	7.66317	7.48831	7.69263	7.18257	8.12495	7.14306	8.19789	P	P	P	P	P	P	P	noncoding	CR933627		misc_RNA	3185	chr7	+	23253693	23279376	TGATACTCACTTTCCATAAAAATCAGGCACAACCCTGTACCCTTGCCCACTGGAGTTTGT	intergenic
ASHG19A3A018332	111176	108995	96658.4	51694.1	56601.9	58286.8	66307.5	16.4731	16.4958	16.3766	15.8861	15.9606	15.9882	16.1386	P	P	P	P	P	P	P	noncoding	ENST00000464473	PPIAL	Ensembl	501	chr20	+	41859399	41859900	TCCAGGAATGGCAAGACCAGCAAGAAGATAATCATTGCTGACTGCAGACAACTTCGATAA	intergenic
ASHG19A3A038356	24663.1	24941.9	22698.7	11162.1	11237.7	9877.48	11692.7	14.3406	14.3881	14.3017	13.6097	13.6529	13.4149	13.6006	P	P	P	P	P	P	P	noncoding	ENST00000391389	RP11-134K1.2	Ensembl	531	chr9	+	8713310	8713841	AAGAAAATGAAGAAGTCTTCAGGGGAGACTGTCTACTGTGGTCAGGTGTTTGAGAAGTCC	intronic antisense	NM_001171025	PTPRD	receptor-type tyrosine-protein phosphatase delta	-	8314245	8733946
ASHG19A3A038356	24663.1	24941.9	22698.7	11162.1	11237.7	9877.48	11692.7	14.3406	14.3881	14.3017	13.6097	13.6529	13.4149	13.6006	P	P	P	P	P	P	P	noncoding	ENST00000391389	RP11-134K1.2	Ensembl	531	chr9	+	8713310	8713841	AAGAAAATGAAGAAGTCTTCAGGGGAGACTGTCTACTGTGGTCAGGTGTTTGAGAAGTCC	intronic antisense	NM_001040712	PTPRD	receptor-type tyrosine-protein phosphatase delta	-	8314245	8733946
ASHG19A3A038356	24663.1	24941.9	22698.7	11162.1	11237.7	9877.48	11692.7	14.3406	14.3881	14.3017	13.6097	13.6529	13.4149	13.6006	P	P	P	P	P	P	P	noncoding	ENST00000391389	RP11-134K1.2	Ensembl	531	chr9	+	8713310	8713841	AAGAAAATGAAGAAGTCTTCAGGGGAGACTGTCTACTGTGGTCAGGTGTTTGAGAAGTCC	intronic antisense	NM_002839	PTPRD	receptor-type tyrosine-protein phosphatase delta	-	8314245	10612723
ASHG19A3A038356	24663.1	24941.9	22698.7	11162.1	11237.7	9877.48	11692.7	14.3406	14.3881	14.3017	13.6097	13.6529	13.4149	13.6006	P	P	P	P	P	P	P	noncoding	ENST00000391389	RP11-134K1.2	Ensembl	531	chr9	+	8713310	8713841	AAGAAAATGAAGAAGTCTTCAGGGGAGACTGTCTACTGTGGTCAGGTGTTTGAGAAGTCC	intronic antisense	NM_130391	PTPRD	receptor-type tyrosine-protein phosphatase delta	-	8314245	8733946
ASHG19A3A038356	24663.1	24941.9	22698.7	11162.1	11237.7	9877.48	11692.7	14.3406	14.3881	14.3017	13.6097	13.6529	13.4149	13.6006	P	P	P	P	P	P	P	noncoding	ENST00000391389	RP11-134K1.2	Ensembl	531	chr9	+	8713310	8713841	AAGAAAATGAAGAAGTCTTCAGGGGAGACTGTCTACTGTGGTCAGGTGTTTGAGAAGTCC	intronic antisense	NM_130393	PTPRD	receptor-type tyrosine-protein phosphatase delta	-	8314245	8733946
ASHG19A3A038356	24663.1	24941.9	22698.7	11162.1	11237.7	9877.48	11692.7	14.3406	14.3881	14.3017	13.6097	13.6529	13.4149	13.6006	P	P	P	P	P	P	P	noncoding	ENST00000391389	RP11-134K1.2	Ensembl	531	chr9	+	8713310	8713841	AAGAAAATGAAGAAGTCTTCAGGGGAGACTGTCTACTGTGGTCAGGTGTTTGAGAAGTCC	intronic antisense	NM_130392	PTPRD	receptor-type tyrosine-protein phosphatase delta	-	8314245	8733946
ASHG19A3A038131	1534.28	1410.26	1486.68	1183.07	1389.44	737.774	1672.52	10.4399	10.3293	10.4601	10.295	10.5784	9.59794	10.7478	P	P	P	P	P	P	P	noncoding	uc004cas.1	LQFBS-1	UCSC_knowngene	2713	chr9	-	134372865	134375578	AGTTACTTCAGCAGTTCCTAAGATGCTCCTTCCCCATGTTCTACACTAGACACAGAGCTT	natural antisense	NM_013318	PRRC2B	protein PRRC2B	+	134305476	134375575
ASHG19A3L0002647	20.199	17.9602	15.2776	27.4644	26.4217	18.7512	24.863	4.50334	4.47425	4.19876	4.59268	4.60599	4.06247	4.37257	A	P	A	P	P	P	P	noncoding	BF531040	lincRNA-AGPAT5-2	lincRNA	862	chr8	-	6657195	6657975	GTTCAGCTCTAAATTCTATAGATCTAGAAAGTGCTTTTCATTTCTGTGAGGTGCCCCTCT	intergenic
ASHG19A3A026277	17.8231	10.7254	17.4321	23.4973	23.0468	17.4301	36.927	4.32033	3.8498	4.37268	4.35001	4.40208	3.94509	4.97754	A	A	A	P	P	P	P	noncoding	ENST00000424943	RP4-617C6.1	Ensembl	2755	chr1	+	95940292	95944912	ATGGGGAGCAATAAATTATTGGCCTAATTCGTGCCTGGTTCCAAAGAAAAGGGGCAGTTG	intergenic
ASHG19A3A037600	1299.32	1256.12	1244.19	1524.37	1624.37	1194.73	1644.61	10.2181	10.1743	10.2081	10.6713	10.7936	10.321	10.7255	P	P	P	P	P	P	P	noncoding	ENST00000505936	AL353710.1	Ensembl	1751	chr9	-	79808707	79810652	AGGACACCGTCACCCACAGCCTCCCCCGACGGCTTTTCCAATGTATATGCAGGCCTTACC	intronic antisense	NM_001018037	VPS13A	vacuolar protein sorting-associated protein 13A	+	79792360	80032399
ASHG19A3A037600	1299.32	1256.12	1244.19	1524.37	1624.37	1194.73	1644.61	10.2181	10.1743	10.2081	10.6713	10.7936	10.321	10.7255	P	P	P	P	P	P	P	noncoding	ENST00000505936	AL353710.1	Ensembl	1751	chr9	-	79808707	79810652	AGGACACCGTCACCCACAGCCTCCCCCGACGGCTTTTCCAATGTATATGCAGGCCTTACC	intronic antisense	NM_015186	VPS13A	vacuolar protein sorting-associated protein 13A	+	79792360	80000106
ASHG19A3A037600	1299.32	1256.12	1244.19	1524.37	1624.37	1194.73	1644.61	10.2181	10.1743	10.2081	10.6713	10.7936	10.321	10.7255	P	P	P	P	P	P	P	noncoding	ENST00000505936	AL353710.1	Ensembl	1751	chr9	-	79808707	79810652	AGGACACCGTCACCCACAGCCTCCCCCGACGGCTTTTCCAATGTATATGCAGGCCTTACC	intronic antisense	NM_033305	VPS13A	vacuolar protein sorting-associated protein 13A	+	79792360	80032399
ASHG19A3A037600	1299.32	1256.12	1244.19	1524.37	1624.37	1194.73	1644.61	10.2181	10.1743	10.2081	10.6713	10.7936	10.321	10.7255	P	P	P	P	P	P	P	noncoding	ENST00000505936	AL353710.1	Ensembl	1751	chr9	-	79808707	79810652	AGGACACCGTCACCCACAGCCTCCCCCGACGGCTTTTCCAATGTATATGCAGGCCTTACC	intronic antisense	NM_001018038	VPS13A	vacuolar protein sorting-associated protein 13A	+	79792360	79997921
ASHG19A3A007466	29.6737	34.2239	32.2583	41.7083	40.4819	35.2949	42.07	5.05351	5.30175	5.22445	5.21799	5.24824	5.02032	5.17613	P	P	P	P	P	P	P	noncoding	NR_027077	LOC283761	RefSeq_NR	1368	chr15	-	90048161	90067265	TAGCATAAGACCTGGCTTGTGACAGATCTGCCACCCTCTAGCTGGGTGACTTTTAGACAA	intergenic
ASHG19A3A010126	81.9606	65.6235	73.9678	35.0268	47.8325	32.5483	56.6417	6.48439	6.17488	6.37093	4.95709	5.49988	4.89944	5.62466	P	P	P	P	P	P	P	noncoding	ENST00000400144	AP005380.2	Ensembl	366	chr18	-	5132780	5133150	TTATTTCTCAGACAGTGGATCCAAAATTAAACCACATCCTCAGGCCACCAGTGGAAGGAG	intergenic
ASHG19A3L0001046	102.083	98.074	104.314	93.3843	151.029	95.8117	182.354	6.78774	6.72858	6.8439	6.43569	7.22262	6.50735	7.38432	P	M	P	P	P	P	P	noncoding	exon2235-	lincRNA-INHBB-4	lincRNA	102	chr2	-	121155131	121155232	GTCCGTTTCCCTGCTCTTCACCAAGGGCTGGCCTAGGTCAGGCACCGAGCTGGGAGCTGG
ASHG19A3A037645	69.4846	54.631	64.763	76.8115	114.411	74.3406	123.313	6.24936	5.92448	6.18361	6.14189	6.80482	6.1364	6.79253	P	P	P	P	P	P	P	noncoding	ENST00000447148	RP11-202I11.2	Ensembl	429	chr9	-	88370956	88380027	ATCACTCAAGTGATCCATCATACAGCACCTCCAGTTCCAAAGAATACTGACTTACTTCAG	intergenic
ASHG19A3A019110	34.474	27.9439	28.999	29.6476	35.8576	36.6314	40.1405	5.26416	5.03525	5.08053	4.7059	5.06645	5.07944	5.10349	A	P	P	P	P	M	P	noncoding	HIT000217488		H-invDB	216	chr21	+	26744141	26744357	TAAAAATCCCATTTAAACCACAGACCAGCAGAGCCTGGCAGCCTTTGGATTTAGTGCTGT	intergenic
ASHG19A3A007338	122.136	133.266	117.438	175.036	217.611	200.045	239.527	7.02861	7.14257	7.0047	7.37292	7.77544	7.61356	7.80237	P	P	P	P	P	M	M	noncoding	NR_024538	GSTM4	RefSeq_NR	1359	chr1	+	110198697	110204330	CAAGCTGGGCCTGGACTTTCCCAATGTGGGGAGACAGAAGAGGAGAAGATTCGTGTGGAC	exon sense-overlapping	NM_000850	GSTM4	glutathione S-transferase Mu 4 isoform 1	+	110198697	110204331
ASHG19A3A007338	122.136	133.266	117.438	175.036	217.611	200.045	239.527	7.02861	7.14257	7.0047	7.37292	7.77544	7.61356	7.80237	P	P	P	P	P	M	M	noncoding	NR_024538	GSTM4	RefSeq_NR	1359	chr1	+	110198697	110204330	CAAGCTGGGCCTGGACTTTCCCAATGTGGGGAGACAGAAGAGGAGAAGATTCGTGTGGAC	exon sense-overlapping	NM_147148	GSTM4	glutathione S-transferase Mu 4 isoform 2	+	110198697	110208123
ASHG19A3A015636	71.8175	73.8629	64.6223	62.5542	65.1476	63.8616	66.0534	6.3004	6.33566	6.17964	5.83067	5.96557	5.90982	5.85224	P	P	P	P	P	P	P	noncoding	ENST00000432064	AC079807.2	Ensembl	440	chr2	+	48132816	48134774	TAGGTTTGACATAGATAATTAAGCAACTACAAAGCGTGATAAAGCTTTTGAGAGGGAGGA	natural antisense	NM_001190274	FBXO11	F-box only protein 11 isoform 4	-	48034058	48132932
ASHG19A3A032717	1749.55	2046.24	1730.13	613.341	613.534	615.879	666.458	10.623	10.8689	10.6751	9.29271	9.34918	9.3225	9.3618	P	P	P	P	P	P	P	noncoding	uc003thg.2	CR606158	UCSC_knowngene	1572	chr7	-	39893287	39894859	GAACAGTCACTCCATAGTGCAATCCATATTAATAGCCTTCTTATCTTAAGTCTTCATCTC	intergenic
ASHG19A3A026160	160.471	200.616	169.867	307.668	335.6	344.9	388.341	7.39858	7.69776	7.50952	8.23086	8.4297	8.43255	8.53021	P	P	P	P	P	P	P	noncoding	uc003imn.2	BC035179	UCSC_knowngene	2650	chr4	+	152877142	152890531	GCCCCACGCTCTGGTTTCTATCCCACGTACTGTATTTAATTTTAGCAAAATCCTAGTAAA	intergenic
CUST_380_PI426073487	24.7417	28.9229	28.6478	26.8371	21.9849	27.0786	28.2658	4.79725	5.07987	5.0629	4.55805	4.3318	4.62437	4.56485	A	P	P	P	P	P	P	noncoding	uc.382+	uc.382	UCR	200	chr15	+	35918911	35919111	TTGGCTCTCATTAGAACAGCTTTATATGTGCAAATGTATTTGGGTCTGGTTGCCACTTTT	intergenic
ASHG19A3A039003	1682.42	2032.76	1428.84	658.863	634.781	760.334	789.508	10.5625	10.8599	10.3991	9.40165	9.4014	9.64116	9.61432	P	P	P	P	P	P	P	noncoding	ENST00000395253	RP11-520B13.7	Ensembl	773	chr9	+	99883940	99884713	AGATAACACTGGGGTTACTGGCTCTGCAACATTTTGAATTAGCAAATTCATTATGCCATA	intergenic
ASHG19A3A012995	11478.9	14139.4	10833	7335.44	7602.87	8044.7	7961.92	13.2811	13.5812	13.2517	12.9768	13.0655	13.1068	13.0266	P	P	P	P	P	P	P	noncoding	uc001hyk.1	BC133032	UCSC_knowngene	316	chr1	-	237167402	237167718	AGTGCAAAAAGTGCAAATGCACCTCCTGCAAGAAGAGCTGCTGCTCCTGTTGCCCCCTGG	intergenic
ASHG19A3A019559	50.8257	69.6791	47.3827	35.4027	108.111	84.5527	89.9114	5.80562	6.25689	5.75588	4.97184	6.71803	6.31769	6.31191	P	P	P	M	M	M	M	noncoding	BC127773		misc_RNA	425	chr22	-	23587586	23587990	TTGCATCCACGCCAAGTGCCTCAAAATTCTTTATAAATGAGACGTGCCCCATCCAGTTAG	intronic antisense	NM_021574	BCR	breakpoint cluster region protein isoform 2	+	23522551	23660224
ASHG19A3A019559	50.8257	69.6791	47.3827	35.4027	108.111	84.5527	89.9114	5.80562	6.25689	5.75588	4.97184	6.71803	6.31769	6.31191	P	P	P	M	M	M	M	noncoding	BC127773		misc_RNA	425	chr22	-	23587586	23587990	TTGCATCCACGCCAAGTGCCTCAAAATTCTTTATAAATGAGACGTGCCCCATCCAGTTAG	intronic antisense	NM_004327	BCR	breakpoint cluster region protein isoform 1	+	23522551	23660224
ASHG19A3A027345	2391.83	1985.8	2012.71	3247.16	3469.69	4064.16	3996.89	11.0773	10.8179	10.89	11.7723	11.8989	12.1058	12.007	P	P	P	P	P	M	P	noncoding	NR_015360	FLJ33630	RefSeq_NR	2977	chr5	-	127357245	127418766	GAGCCAATACACTGAGGTCACTGGATAAATAAACAGATTCTTGCAAGTGCTTTGGAAATG	bidirectional	NM_001046	SLC12A2	solute carrier family 12 member 2	+	127419482	127525380
ASHG19A3H0000038	30.2847	49.0372	26.4651	64.9192	21.9306	55.9729	32.7302	5.08044	5.78026	4.95415	5.88444	4.32848	5.71188	4.79452	P	P	P	P	P	P	P	noncoding	nc-HOXA9-79-	nc-HOXA9-79	HOX cluster	248	chr7	-	27209027	27209275	TTGTTGGGATCCACCTTTCTCTCGACAGCACGACACTGCCTTCATTACTTCAGTTGAAAT	intergenic
ASHG19A3A017833	73.7208	99.4541	52.1717	252.506	172.796	243.918	163.692	6.33704	6.74637	5.888	7.933	7.42596	7.9199	7.21879	P	P	P	P	P	P	P	noncoding	NR_027042	MDS2	RefSeq_NR	1027	chr1	+	23953823	23967056	TTTCATGGTGTCTGCTTAATGTTAATCTCTCCAAGCTTCCCACCAGACTGCAAAGGCTGA	intergenic
ASHG19A3A013487	63.9058	67.7674	37.9111	58.9489	28.6799	47.3143	38.1137	6.12521	6.21754	5.45061	5.73995	4.73565	5.4627	5.02487	P	P	P	P	P	P	P	noncoding	ENST00000431951	AC068274.1	Ensembl	384	chr2	-	35949824	35950208	AAATTTGATGAACTTGATGCCAATAATCTGCCTCTCAATTTGAAAACCACCTGAAGTTAC	intergenic
ASHG19A3A014042	2848.28	2860.79	1854.07	3662.28	3675.06	3666.98	3729.79	11.32	11.3222	10.7774	11.9476	11.9875	11.9494	11.913	P	P	P	P	P	P	P	noncoding	uc002sva.1	DKFZp667P0924	UCSC_knowngene	2442	chr2	-	96523056	96610442	AGAAAGTTTCTCTTTTGAATATTGCCACAAGAATAACGGGCGGTGGGAAATCTGGAACAG	intergenic
ASHG19A3L0000384	60.986	59.8109	37.6301	523.088	140.008	460.163	184.436	6.05695	6.04586	5.43927	9.06046	7.11217	8.87929	7.39936	P	P	P	P	P	P	P	noncoding	chr11:44557524-44573924-	lincRNA-ALX4	lincRNA	16401	chr11	-	44557524	44573924	GTATAAGCACCCAGCACCTTACATACATATTGCTAGATCCTTTCTTTTCTCTCTCTATCT	intergenic
ASHG19A3A032328	113.086	97.2887	72.823	266.642	97.3127	250.743	102.535	6.92283	6.71662	6.34842	8.01415	6.55867	7.96361	6.50679	P	P	P	P	P	P	P	noncoding	ENST00000455390	RP11-514O12.2	Ensembl	627	chr6	+	167317185	167318323	TTGCGGTTTCTTCCTTGCTCCTTGCAGGTTATATTTGAAATGAATGTCAGAGCCATGCGG	intergenic
ASHG19A3A046011	15.7194	10.6044	18.4885	51.1544	25.8963	50.4006	33.5546	4.13984	3.83704	4.45862	5.53394	4.57507	5.55462	4.8289	A	A	P	P	P	P	P	noncoding	ENST00000439410	AP006294.1	Ensembl	1046	chr11	+	3601832	3602878	GGCTGCTCCAAACTCGTGGAGAATTCCGCCTGCAGGATGACACGAATGCACCTTCTCTTT	intergenic
ASHG19A3A030171	6.67728	6.27181	5	98.0075	84.9658	81.913	91.495	3.00647	3.27483	2.39437	6.50383	6.35843	6.27179	6.33524	A	A	A	P	P	P	P	noncoding	ENST00000503154	BX842679.1	Ensembl	1664	chr1	+	147628426	147630473	GGTATTGTGTGTCAACAGGTGTTAGCCTGATAGTTATATTTTTAATGAGAGAAAACGAAC	intergenic
ASHG19A3A048980	66.3781	62.0774	50.134	152.476	28.4551	54.8419	46.4568	6.18433	6.09918	5.83245	7.16051	4.72313	5.68104	5.32365	P	P	P	P	P	P	P	noncoding	uc001dva.2	BC043293	UCSC_knowngene	1824	chr1	-	106144775	106161557	ATCGTCTGCTCCAGACAACAGCCTTTCCCTAGTTTATACCATTAACATTTTATTAATGGT	intergenic
ASHG19A3A028037	76.6629	75.9008	61.4661	249.554	233.831	212.448	257.357	6.39279	6.37301	6.11676	7.9155	7.88394	7.70731	7.91419	P	P	P	P	P	P	P	noncoding	uc003jgq.1	AX747383	UCSC_knowngene	1984	chr5	+	23951456	24178372	ATCTCTTTGACATATACAAATGCAACTTTACAAGGGAGAAAAAAGCATCCAATTCTCTGC	intergenic
ASHG19A3A031845	244.445	237.422	199.403	228.232	133.325	135.527	135.425	7.96418	7.92335	7.72743	7.77632	7.03502	7.02526	6.93465	P	P	P	P	P	P	P	noncoding	ENST00000404337	KRT18P50	Ensembl	1243	chr6	+	96438982	96440225	AGGATAGTGGACGGCAAAGTAGCATCTCCCACCAATGACACTAAAGTTCTGAGGTTTTGA	intergenic
ASHG19A3A041225	78574.3	73517.8	71845.8	53298.2	57238.2	36133	52724	15.9836	15.946	15.9678	15.9211	15.9771	15.3189	15.7933	P	P	P	P	P	P	P	noncoding	ENST00000438336	RP11-475D8.3	Ensembl	660	chrX	+	78018722	78019382	ACCTATTTTGTAGAAGGTGAAGATGCTGGCAACAGGAGGACTAGATCAACAGTTTTATTA	intergenic
ASHG19A3A036632	25.2882	23.7251	20.9866	43.0402	16.2463	11.0356	17.0344	4.83102	4.8208	4.63284	5.26263	3.86895	3.21038	3.77389	A	P	P	P	P	A	P	noncoding	uc003xth.2	BC048118	UCSC_knowngene	1829	chr8	+	58256345	58277413	ATGGAATGACTGTGGTTTCCCCTGAAAGAAGCATCACTGATCTCTGCACAGGAGAAACAA	intergenic
ASHG19A3L0000419	114.12	98.5443	97.7149	105.623	94.9395	108.272	107.445	6.93533	6.73383	6.75552	6.61378	6.52696	6.68857	6.58396	P	P	P	P	P	P	P	noncoding	DA288150	lincRNA-GRM5	lincRNA	568	chr11	+	88110642	88111208	CTGAAATGAACAGTTAATTTCCTGGTCAAATACATTGGAGGAAATGCTGTATAGTGTGAT	intergenic
ASHG19A3A054139	230.316	172.411	186.684	106.885	98.7316	91.4851	80.8959	7.89013	7.49188	7.64008	6.63072	6.57989	6.43783	6.16076	P	P	P	P	P	P	P	noncoding	BC111535		RNAdb	593	chr1	-	160057810	160058342	TGTCCATCCATCCACTCATGAACAAATGTGAAGGTCAAACACAGACTGGCATTTTCACCC	natural antisense	NM_004983	KCNJ9	G protein-activated inward rectifier potassium	+	160051359	160059212
ASHG19A3A037977	4938.67	4801.68	4280.58	3181.67	2231.09	2221.44	2136.72	12.0968	12.0774	11.9704	11.7449	11.2587	11.2296	11.102	P	P	P	P	P	P	P	noncoding	NR_002930	PTPRVP	RefSeq_NR	4095	chr1	+	202137178	202158577	ATTTGCCTGCCCTTCCCCAACAAAAGGTCCTGTTTCTCTGCCCAGGTTCAGCGTTGCAGC	intergenic
ASHG19A3H0000034	4207.21	3913.46	3664.88	4057.82	2084.38	1807.85	1402.17	11.8753	11.7754	11.7429	12.0986	11.1543	10.9303	10.4861	P	P	P	P	P	P	P	noncoding	nc-HOXA7-74-	nc-HOXA7-74	HOX cluster	238	chr7	-	27197697	27197935	TGCGCAGGAACTGGGGCTCCGTGGCGTCCCGATCTGAACCCTCCCTCCACCTTTTGTATT	intergenic
ASHG19A3A038266	50.0347	39.0788	42.0341	43.3567	30.0809	29.9853	31.1437	5.78274	5.47948	5.59074	5.27569	4.80317	4.77837	4.71602	P	P	P	P	P	M	M	noncoding	AK097764		RNAdb	1701	chr9	-	140144670	140147949	AATTTGCCAGGAATTTCACTGCCTTCTGGTCAGAATTCATCATCAGAGTCTCCTGGCTCT	natural antisense	NM_001004353	C9orf173	hypothetical protein LOC441476	+	140145729	140147934
ASHG19A3L0001781	41.6937	29.4341	29.445	39.1968	28.0464	13.8329	11.6058	5.52485	5.10198	5.10099	5.12689	4.69854	3.56761	3.14795	P	P	P	A	P	M	M	noncoding	BE877397	lincRNA-ZNF184-1	lincRNA	910	chr6	+	27375649	27376276	ATGAACTTCAGACATTCGGATTATAAACCTATGCCGACCCTGATATAATTGGCGCGCACC	intergenic
ASHG19A3A029313	27.0657	13.2941	20.1933	22.6077	23.2315	20.1179	33.7548	4.92684	4.10492	4.58297	4.28967	4.41359	4.17085	4.83787	A	P	P	P	P	P	P	noncoding	NR_033189	LOC100130000	RefSeq_NR	1731	chr1	+	143687129	143714180	CTTACTGGTCTTTGAGAAATTGTGAAAACAAAAAAGGTGCCATAAGCCAAAAAAGGAGCA	intergenic
ASHG19A3A033328	86.9673	69.9091	77.5539	108.719	63.2132	49.7438	63.105	6.56259	6.26168	6.43538	6.65658	5.92395	5.53394	5.78553	P	P	P	P	P	P	P	noncoding	ENST00000453666	RP11-325F22.5	Ensembl	640	chr7	-	104558006	104567077	GCTATCAGAATATTGACTATTAGTGCTTTCATCACGCGGCTCCATCCAAACCCCTGCTTT	intergenic
ASHG19A3A029157	28.5179	22.8892	33.9956	59.4026	67.4328	64.0339	58.599	4.99766	4.77236	5.29282	5.75188	6.01974	5.91497	5.67346	A	P	P	P	P	P	P	noncoding	NR_002988	SNORA74B	RefSeq_NR	204	chr5	+	172447728	172447932	CCCGAGAGTGTGCTAAGCATTCACTTTGGCTGCTTAGTTCTAGTCTGGGAGCAGACAGAG	intron sense-overlapping	NM_003945	ATP6V0E1	V-type proton ATPase subunit e 1	+	172410762	172461900
ASHG19A3A027952	154.973	119.463	133.845	203.074	125.66	159.918	206.716	7.35055	6.99189	7.18738	7.59688	6.94731	7.28054	7.57757	P	P	P	P	M	P	M	noncoding	AF056438		RNAdb	318	chr5	+	10342924	10343235	TAGCTGTAAGTAAGAATAGTTCATCACCCACTGCTGGGTTTGCATCCTCCTCCAAATAGG	intergenic
ASHG19A3A043893	63.9963	56.8809	41.9641	24.0125	31.1557	42.0062	32.192	6.12745	5.981	5.58858	4.38307	4.85875	5.28391	4.76883	P	P	P	P	P	P	M	noncoding	ENST00000453605	RP11-292F22.4	Ensembl	159	chr10	+	47556164	47566804	GAGAGAGAAAAAAGTAAAAGAAAAGAAACCCAAAAGGGAAAATATAGCTAAGGTGAACTG	intergenic
ASHG19A3A013957	104.978	17.6136	16.4387	22.8741	38.0593	35.3032	46.7011	6.8227	4.44833	4.29834	4.30898	5.15757	5.02058	5.33265	A	P	A	P	P	P	P	noncoding	ENST00000503875	AC012511.1	Ensembl	1819	chr2	-	86200672	86203652	CATTGCATAAATGGCTCCACAGATGATGTTCCAGTGAAACCTCACAATACCCTGACAAAA	intergenic
ASHG19A3A043241	15.8898	9.24504	7.25872	17.0425	19.7284	17.6261	23.9341	4.15342	3.6857	3.20051	3.85304	4.17136	3.96142	4.31164	A	A	A	P	P	P	P	noncoding	ENST00000448532	RP11-302K17.3	Ensembl	255	chr10	-	103845232	103845487	TGCAAGAATTTCAACATCAAAAATGACATTACTGAAAAGCAGGAAGCCCAGGCACACAAA	intergenic
ASHG19A3A025467	1709.28	1391.35	1779.63	362.703	783.063	215.785	823.215	10.5872	10.3091	10.7176	8.48888	9.71069	7.72908	9.68505	P	P	P	P	P	P	P	noncoding	ENST00000463499	RP11-49F1.1	Ensembl	571	chr4	+	42473826	42474397	ATAGGAGAACAACATGGAAAGCAAGGCTGAAACTTTTTCTGGTGTCTATAAGCAGCTCAC	intronic antisense	NM_006095	ATP8A1	probable phospholipid-transporting ATPase IA	-	42410391	42659122
ASHG19A3A025467	1709.28	1391.35	1779.63	362.703	783.063	215.785	823.215	10.5872	10.3091	10.7176	8.48888	9.71069	7.72908	9.68505	P	P	P	P	P	P	P	noncoding	ENST00000463499	RP11-49F1.1	Ensembl	571	chr4	+	42473826	42474397	ATAGGAGAACAACATGGAAAGCAAGGCTGAAACTTTTTCTGGTGTCTATAAGCAGCTCAC	intronic antisense	NM_001105529	ATP8A1	probable phospholipid-transporting ATPase IA	-	42410391	42659122
ASHG19A3A025903	24.6522	12.8529	22.0604	5	33.4517	21.3848	47.7001	4.79182	4.06596	4.69767	2.32974	4.96003	4.2644	5.36539	A	P	P	P	P	P	A	noncoding	ENST00000510345	RP11-610P19.2	Ensembl	1554	chr4	+	111337437	111339511	CCTTTCACACCTGAAGAGTTCATACTGGAGGGAAACCTTATGAGTGTAAGGTTTGTGACA	intergenic
ASHG19A3A028654	403.248	426.143	390.164	554.549	649.482	674.196	674.124	8.64594	8.71492	8.64676	9.14651	9.4355	9.45799	9.38102	P	P	P	P	P	P	P	noncoding	ENST00000508517	AC010226.4	Ensembl	539	chr5	+	114937940	114955975	TTACTGAACATCGGATGAGACCATGGATAGTAAATTGGGAGTGAAGGTCCATACCTGGGT	intronic antisense	NM_001164469	TMED7-TICAM2	TRAM adaptor with GOLD domain isoform 2	-	114914338	114961876
ASHG19A3A028654	403.248	426.143	390.164	554.549	649.482	674.196	674.124	8.64594	8.71492	8.64676	9.14651	9.4355	9.45799	9.38102	P	P	P	P	P	P	P	noncoding	ENST00000508517	AC010226.4	Ensembl	539	chr5	+	114937940	114955975	TTACTGAACATCGGATGAGACCATGGATAGTAAATTGGGAGTGAAGGTCCATACCTGGGT	intronic antisense	NM_181836	TMED7	transmembrane emp24 domain-containing protein 7	-	114948904	114961876
ASHG19A3A028654	403.248	426.143	390.164	554.549	649.482	674.196	674.124	8.64594	8.71492	8.64676	9.14651	9.4355	9.45799	9.38102	P	P	P	P	P	P	P	noncoding	ENST00000508517	AC010226.4	Ensembl	539	chr5	+	114937940	114955975	TTACTGAACATCGGATGAGACCATGGATAGTAAATTGGGAGTGAAGGTCCATACCTGGGT	natural antisense	NM_021649	TICAM2	TIR domain-containing adapter molecule 2	-	114914338	114938176
ASHG19A3A028654	403.248	426.143	390.164	554.549	649.482	674.196	674.124	8.64594	8.71492	8.64676	9.14651	9.4355	9.45799	9.38102	P	P	P	P	P	P	P	noncoding	ENST00000508517	AC010226.4	Ensembl	539	chr5	+	114937940	114955975	TTACTGAACATCGGATGAGACCATGGATAGTAAATTGGGAGTGAAGGTCCATACCTGGGT	intronic antisense	NM_001164468	TMED7-TICAM2	TRAM adaptor with GOLD domain isoform 1	-	114914338	114961876
ASHG19A3A043542	64.4069	65.5744	58.1989	102.871	124.86	95.585	140.891	6.13714	6.17319	6.04083	6.5755	6.93691	6.50437	6.99483	P	P	P	P	P	P	P	noncoding	ENST00000451575	RP11-499O7.7	Ensembl	432	chr10	+	5038044	5039569	ATGCTATTTCTGAGCACAAGCAACTCCATGAACCCTATCCTGGTTTCTCAATAACTCCGA	natural antisense	NM_001354	AKR1C2	aldo-keto reductase family 1 member C2 isoform	-	5031964	5060207
ASHG19A3A043542	64.4069	65.5744	58.1989	102.871	124.86	95.585	140.891	6.13714	6.17319	6.04083	6.5755	6.93691	6.50437	6.99483	P	P	P	P	P	P	P	noncoding	ENST00000451575	RP11-499O7.7	Ensembl	432	chr10	+	5038044	5039569	ATGCTATTTCTGAGCACAAGCAACTCCATGAACCCTATCCTGGTTTCTCAATAACTCCGA	natural antisense	NM_205845	AKR1C2	aldo-keto reductase family 1 member C2 isoform	-	5031964	5060207
ASHG19A3A054808	160.875	156.194	166.912	151.396	204.495	157.268	236.713	7.40311	7.35866	7.48279	7.15043	7.67965	7.25703	7.78209	P	P	P	P	P	P	P	noncoding	ENST00000411871	VN2R10P	Ensembl	853	chr16	+	77254302	77255155	GCTTTCAGTGCTGAGCTACTTGGCTGCATCTTTGCCCCCATATATTACGTTACTCTTATG	intergenic
ASHG19A3A015701	15426.4	15198.5	14067	20107.6	20090.9	20113.1	21924.5	13.6894	13.6805	13.6192	14.4931	14.4818	14.4798	14.5182	P	P	P	P	P	P	P	noncoding	AL050376		misc_RNA	3204	chr2	+	61415148	61418338	ACCTTTTCCCCCCATAAACACTGCAAGGGTAAACAATAAATCTTCTTTCCTAATTATCTC	natural antisense	NM_014709	USP34	ubiquitin carboxyl-terminal hydrolase 34	-	61414589	61697849
ASHG19A3A024408	12411.8	12745.7	11652.4	8647.87	8981.93	7709.56	9015.07	13.3837	13.445	13.3577	13.2302	13.322	13.0388	13.2104	P	P	P	P	P	P	P	noncoding	NR_003249	HNRPDL	RefSeq_NR	3615	chr4	-	83344348	83351378	ATCTCTGGGGGTCGCACGTTGCGGGCAGAGCGCAAGGCATACACCAGAAAACGCTGTCCT	exon sense-overlapping	NM_001207000	HNRPDL	heterogeneous nuclear ribonucleoprotein D-like	-	83343716	83351378
ASHG19A3A024408	12411.8	12745.7	11652.4	8647.87	8981.93	7709.56	9015.07	13.3837	13.445	13.3577	13.2302	13.322	13.0388	13.2104	P	P	P	P	P	P	P	noncoding	NR_003249	HNRPDL	RefSeq_NR	3615	chr4	-	83344348	83351378	ATCTCTGGGGGTCGCACGTTGCGGGCAGAGCGCAAGGCATACACCAGAAAACGCTGTCCT	exon sense-overlapping	NM_031372	HNRPDL	heterogeneous nuclear ribonucleoprotein D-like	-	83343716	83351378
ASHG19A3A024408	12411.8	12745.7	11652.4	8647.87	8981.93	7709.56	9015.07	13.3837	13.445	13.3577	13.2302	13.322	13.0388	13.2104	P	P	P	P	P	P	P	noncoding	NR_003249	HNRPDL	RefSeq_NR	3615	chr4	-	83344348	83351378	ATCTCTGGGGGTCGCACGTTGCGGGCAGAGCGCAAGGCATACACCAGAAAACGCTGTCCT	bidirectional	NM_021204	ENOPH1	enolase-phosphatase E1	+	83351725	83382244
ASHG19A3H0000208	754.401	704.665	753.823	558.244	608.997	644.315	553.935	9.47182	9.38379	9.52832	9.15499	9.33817	9.38852	9.08222	P	P	P	P	P	P	P	noncoding	nc-HOXC9-135-	nc-HOXC9-135	HOX cluster	138	chr12	+	54389365	54389503	CGGGCAGGGCAGGGAGCGGCTCTAGCTCTGGGGCGGCTCCCCCTCCAGCCACTCCCAGGC	intergenic
ASHG19A3A044149	21.8433	10.2595	18.5239	18.4846	27.4691	26.3217	34.4026	4.6112	3.80302	4.46021	3.98171	4.66746	4.58031	4.87051	A	P	P	P	P	P	P	noncoding	ENST00000413564	RP11-328K22.1	Ensembl	418	chr10	+	79073698	79075452	CCACAGCTGTTCATATGACATGGTTCATTAAATAATAAAGTCTTCATCAGGCTCTCCTGC	intronic antisense	NM_001161353	KCNMA1	calcium-activated potassium channel subunit	-	78644634	79397577
ASHG19A3A044149	21.8433	10.2595	18.5239	18.4846	27.4691	26.3217	34.4026	4.6112	3.80302	4.46021	3.98171	4.66746	4.58031	4.87051	A	P	P	P	P	P	P	noncoding	ENST00000413564	RP11-328K22.1	Ensembl	418	chr10	+	79073698	79075452	CCACAGCTGTTCATATGACATGGTTCATTAAATAATAAAGTCTTCATCAGGCTCTCCTGC	intronic antisense	NM_001014797	KCNMA1	calcium-activated potassium channel subunit	-	78629358	79397577
ASHG19A3A044149	21.8433	10.2595	18.5239	18.4846	27.4691	26.3217	34.4026	4.6112	3.80302	4.46021	3.98171	4.66746	4.58031	4.87051	A	P	P	P	P	P	P	noncoding	ENST00000413564	RP11-328K22.1	Ensembl	418	chr10	+	79073698	79075452	CCACAGCTGTTCATATGACATGGTTCATTAAATAATAAAGTCTTCATCAGGCTCTCCTGC	intronic antisense	NM_001161352	KCNMA1	calcium-activated potassium channel subunit	-	78644634	79397577
ASHG19A3A044149	21.8433	10.2595	18.5239	18.4846	27.4691	26.3217	34.4026	4.6112	3.80302	4.46021	3.98171	4.66746	4.58031	4.87051	A	P	P	P	P	P	P	noncoding	ENST00000413564	RP11-328K22.1	Ensembl	418	chr10	+	79073698	79075452	CCACAGCTGTTCATATGACATGGTTCATTAAATAATAAAGTCTTCATCAGGCTCTCCTGC	intronic antisense	NM_002247	KCNMA1	calcium-activated potassium channel subunit	-	78644634	79397577
ASHG19A3A000286	379.249	397.107	371.714	331.202	311.643	286.048	334.636	8.56879	8.62457	8.58263	8.34878	8.31549	8.16226	8.3061	P	P	P	P	P	P	P	noncoding	ENST00000445039	RP4-784A16.5	Ensembl	326	chr1	+	53793920	53802890	ATACAAGGCCTGACACATAACAAGCATGAGacggagtctccctctgttgcccagtctgga	bidirectional	NM_017522	LRP8	low-density lipoprotein receptor-related protein	-	53711216	53793726
ASHG19A3A000286	379.249	397.107	371.714	331.202	311.643	286.048	334.636	8.56879	8.62457	8.58263	8.34878	8.31549	8.16226	8.3061	P	P	P	P	P	P	P	noncoding	ENST00000445039	RP4-784A16.5	Ensembl	326	chr1	+	53793920	53802890	ATACAAGGCCTGACACATAACAAGCATGAGacggagtctccctctgttgcccagtctgga	bidirectional	NM_033300	LRP8	low-density lipoprotein receptor-related protein	-	53711211	53793821
ASHG19A3A000286	379.249	397.107	371.714	331.202	311.643	286.048	334.636	8.56879	8.62457	8.58263	8.34878	8.31549	8.16226	8.3061	P	P	P	P	P	P	P	noncoding	ENST00000445039	RP4-784A16.5	Ensembl	326	chr1	+	53793920	53802890	ATACAAGGCCTGACACATAACAAGCATGAGacggagtctccctctgttgcccagtctgga	bidirectional	NM_001018054	LRP8	low-density lipoprotein receptor-related protein	-	53711216	53793726
ASHG19A3A000286	379.249	397.107	371.714	331.202	311.643	286.048	334.636	8.56879	8.62457	8.58263	8.34878	8.31549	8.16226	8.3061	P	P	P	P	P	P	P	noncoding	ENST00000445039	RP4-784A16.5	Ensembl	326	chr1	+	53793920	53802890	ATACAAGGCCTGACACATAACAAGCATGAGacggagtctccctctgttgcccagtctgga	bidirectional	NM_004631	LRP8	low-density lipoprotein receptor-related protein	-	53711216	53793726
ASHG19A3A050787	854.014	858.293	751.144	85.4761	137.908	155.293	155.674	9.64092	9.65977	9.52209	6.30429	7.08553	7.23477	7.14695	P	P	P	P	P	P	P	noncoding	ENST00000416817	AL583842.8	Ensembl	1573	chr1	-	142712909	142729971	CAAACAAAGAAAGGTTGGGAAAACGTATCCTCAGCAATTTCCCAAGAAACTGAAGGAAGA	intergenic
ASHG19A3A024775	42.7578	43.4627	43.0235	57.2085	67.9957	71.5731	84.5208	5.56297	5.62034	5.62449	5.69099	6.03131	6.08543	6.22278	P	P	P	P	P	P	P	noncoding	ENST00000515383	AC112236.1	Ensembl	1095	chr4	-	140539292	140544386	TGAGGAATACGGTCGTGTCTGTTAAACTAATTGTAGCTGTTCACTCCACTATATAATTTT	intergenic
ASHG19A3A009971	375.486	407.955	315.679	458.28	405.238	324.726	414.657	8.55244	8.66119	8.35069	8.84697	8.70502	8.34907	8.6266	P	P	P	P	P	P	P	noncoding	BC038747		misc_RNA	1731	chr17	+	74668023	74669739	TTCTATCAGGCTCTAAGTACAGGCAGGTCCTTAGGACAAATTAGAATAAAACAATCTCAG	intergenic
ASHG19A3A017000	1389.95	1649.7	1364.97	18236.4	31470.7	32495.8	32812.1	10.3053	10.5462	10.3425	14.3508	15.1305	15.1489	15.0945	P	P	P	P	P	P	P	noncoding	NR_026909	STK16	RefSeq_NR	3118	chr2	+	220110200	220115059	CGCCTGACCCCACCCCTGAAGCTGGCGACGGAGCAGGGCCTGTTTTCTCTACACTATAGT	bidirectional	NM_024506	GLB1L	beta-galactosidase-1-like protein precursor	-	220101502	220110131
ASHG19A3A017000	1389.95	1649.7	1364.97	18236.4	31470.7	32495.8	32812.1	10.3053	10.5462	10.3425	14.3508	15.1305	15.1489	15.0945	P	P	P	P	P	P	P	noncoding	NR_026909	STK16	RefSeq_NR	3118	chr2	+	220110200	220115059	CGCCTGACCCCACCCCTGAAGCTGGCGACGGAGCAGGGCCTGTTTTCTCTACACTATAGT	natural antisense	NM_006000	TUBA4A	tubulin alpha-4A chain	-	220115000	220118638
ASHG19A3A017000	1389.95	1649.7	1364.97	18236.4	31470.7	32495.8	32812.1	10.3053	10.5462	10.3425	14.3508	15.1305	15.1489	15.0945	P	P	P	P	P	P	P	noncoding	NR_026909	STK16	RefSeq_NR	3118	chr2	+	220110200	220115059	CGCCTGACCCCACCCCTGAAGCTGGCGACGGAGCAGGGCCTGTTTTCTCTACACTATAGT	exon sense-overlapping	NM_001008910	STK16	serine/threonine-protein kinase 16	+	220110191	220115059
ASHG19A3A018261	126235	149851	125698	89706.1	128407	128514	121143	16.6471	16.9966	16.7918	16.6989	17.1326	17.0817	16.9873	P	P	P	P	P	P	P	noncoding	ENST00000432310	RPL37P1	Ensembl	284	chr20	+	34176245	34176529	TGTGAAGGAACAACACCTAAACCCAAGAGGGTACCTGTTGCAGCATCCAGTTCATCTTAA	intergenic
ASHG19A3A048742	36.9939	42.0348	26.6244	19.5811	39.6156	52.6623	53.3369	5.36106	5.57768	4.96224	4.07052	5.21549	5.62162	5.53394	P	P	P	P	P	P	P	noncoding	NR_029416	SHMT2	RefSeq_NR	2176	chr12	+	57623827	57628717	AGCTCTGAGCCCTGCAGATGATGCAACCGAGCTTCACTGCTTGCATCAGGCAGGGGTCCC	natural antisense	NM_020142	NDUFA4L2	NADH dehydrogenase [ubiquinone] 1 alpha	-	57628685	57634475
ASHG19A3A048742	36.9939	42.0348	26.6244	19.5811	39.6156	52.6623	53.3369	5.36106	5.57768	4.96224	4.07052	5.21549	5.62162	5.53394	P	P	P	P	P	P	P	noncoding	NR_029416	SHMT2	RefSeq_NR	2176	chr12	+	57623827	57628717	AGCTCTGAGCCCTGCAGATGATGCAACCGAGCTTCACTGCTTGCATCAGGCAGGGGTCCC	exon sense-overlapping	NM_005412	SHMT2	serine hydroxymethyltransferase, mitochondrial	+	57623355	57628718
ASHG19A3A048742	36.9939	42.0348	26.6244	19.5811	39.6156	52.6623	53.3369	5.36106	5.57768	4.96224	4.07052	5.21549	5.62162	5.53394	P	P	P	P	P	P	P	noncoding	NR_029416	SHMT2	RefSeq_NR	2176	chr12	+	57623827	57628717	AGCTCTGAGCCCTGCAGATGATGCAACCGAGCTTCACTGCTTGCATCAGGCAGGGGTCCC	exon sense-overlapping	NM_001166359	SHMT2	serine hydroxymethyltransferase, mitochondrial	+	57624110	57628718
ASHG19A3A048742	36.9939	42.0348	26.6244	19.5811	39.6156	52.6623	53.3369	5.36106	5.57768	4.96224	4.07052	5.21549	5.62162	5.53394	P	P	P	P	P	P	P	noncoding	NR_029416	SHMT2	RefSeq_NR	2176	chr12	+	57623827	57628717	AGCTCTGAGCCCTGCAGATGATGCAACCGAGCTTCACTGCTTGCATCAGGCAGGGGTCCC	exon sense-overlapping	NM_001166357	SHMT2	serine hydroxymethyltransferase, mitochondrial	+	57624142	57628718
ASHG19A3A048742	36.9939	42.0348	26.6244	19.5811	39.6156	52.6623	53.3369	5.36106	5.57768	4.96224	4.07052	5.21549	5.62162	5.53394	P	P	P	P	P	P	P	noncoding	NR_029416	SHMT2	RefSeq_NR	2176	chr12	+	57623827	57628717	AGCTCTGAGCCCTGCAGATGATGCAACCGAGCTTCACTGCTTGCATCAGGCAGGGGTCCC	exon sense-overlapping	NM_001166358	SHMT2	serine hydroxymethyltransferase, mitochondrial	+	57623827	57628718
ASHG19A3A048742	36.9939	42.0348	26.6244	19.5811	39.6156	52.6623	53.3369	5.36106	5.57768	4.96224	4.07052	5.21549	5.62162	5.53394	P	P	P	P	P	P	P	noncoding	NR_029416	SHMT2	RefSeq_NR	2176	chr12	+	57623827	57628717	AGCTCTGAGCCCTGCAGATGATGCAACCGAGCTTCACTGCTTGCATCAGGCAGGGGTCCC	exon sense-overlapping	NM_001166356	SHMT2	serine hydroxymethyltransferase, mitochondrial	+	57623355	57628718
ASHG19A3A031383	34.8029	21.562	26.7351	32.6531	33.1073	22.2799	27.713	5.27935	4.69942	4.96796	4.851	4.94444	4.32715	4.53127	A	P	P	P	P	M	M	noncoding	uc003oin.2	AL832447	UCSC_knowngene	6592	chr6	+	33878878	33885984	CCTTCCCTTGAAAATGTGTCTGCTGGGCAATGCTGAGCAAAATTCCACAAAGGAGAGAAA	intergenic
ASHG19A3A031738	21.0569	339.517	17.3961	23.8606	18.6908	395.334	14.2472	4.56056	8.40705	4.36994	4.37453	4.09593	8.64013	3.47599	P	A	A	A	P	P	P	noncoding	ENST00000455530	RP11-415D17.4	Ensembl	461	chr6	+	76164659	76168616	AAGCAAAAGGAAATGCTTTCAACCCAGATCCCAGACACAGAGAGGAGCCCAGGTTTAAAA	intronic antisense	NM_015687	FILIP1	filamin-A-interacting protein 1	-	76017799	76203496
ASHG19A3A035132	1247.1	1190.05	856.727	1536.13	682.536	1056.26	630.9	10.1522	10.0988	9.70677	10.6854	9.51624	10.1424	9.27697	P	P	P	P	P	P	P	noncoding	uc003vts.1	AK094915	UCSC_knowngene	1835	chr7	+	137003338	137011700	CAAATGACTACAGGCATTATCCGAATGATATGATCTTCCTTCCCCATCTTTCTGGGTGTC	intronic antisense	NM_002825	PTN	pleiotrophin	-	136912091	137028546
ASHG19A3A016409	13.9715	9.19746	18.3575	46.2716	39.7556	45.7742	43.1512	3.98223	3.6799	4.446	5.37473	5.22083	5.41329	5.21549	A	A	P	P	P	P	P	noncoding	CR599335		RNAdb	1157	chr2	+	136579505	136580659	AGCATTATTAAATGGTATCTATGGATAAACTTCAGGGGCCCTGTGGAGCCAACCCATTGC	natural antisense	NM_002299	LCT	lactase-phlorizin hydrolase preproprotein	-	136545414	136594750
ASHG19A3A024374	2742.43	2746.55	2297.99	986.061	899.303	923.321	960.671	11.2634	11.271	11.079	10.0185	9.92667	9.92974	9.91849	P	P	P	P	P	P	P	noncoding	ENST00000470927	RP11-1E1.1	Ensembl	724	chr4	-	78003555	78004279	AAGTTTGGTGTCATTTGCTTGGAAGACCTCATTCATGAAACTGCCTTCCCAGGGAAGCAT	intergenic
ASHG19A3A022617	13117.5	12257.4	11530.4	5746.9	5546.23	5593.69	5475.37	13.4659	13.3877	13.3404	12.6187	12.609	12.5864	12.4768	P	P	P	P	P	P	P	noncoding	ENST00000450668	RP11-159C21.3	Ensembl	321	chr1	+	53174793	53175114	CAGAAAACGATGAGACGTCTGAGTACCATTAGGAAGCAGCGGGATAAGCTGATAAAGGAA	intergenic
ASHG19A3A035252	70.9517	67.9153	67.7367	168.509	44.9035	78.8639	73.7974	6.28364	6.22045	6.24598	7.31624	5.4057	6.21754	6.01848	P	P	P	P	P	P	P	noncoding	ENST00000473586	OR2A41P	Ensembl	105	chr7	+	143774813	143774918	ATTTTAGGAGTCTTACTGGCCCTTGTCCATCTAGTGTTACTGCTACCACTGTCCTTCTGT	intergenic
ASHG19A3A014428	24.5016	21.6949	34.2579	76.904	30.5768	31.969	28.7812	4.78424	4.7058	5.30469	6.14405	4.83001	4.87305	4.59609	A	P	P	P	P	P	P	noncoding	ENST00000417715	AC073928.2	Ensembl	444	chr2	-	140861151	140889349	AACCTGAACAGTCTGCTGAAGCACCTGATGTTTGGCCTTCCTGAATGTCATGTAATACGT	intergenic
ASHG19A3A049982	3695.62	3622.67	3266.98	3986.5	4396.94	4474.27	4237.24	11.6837	11.6642	11.5747	12.0705	12.2409	12.2518	12.1026	P	P	P	P	P	P	P	noncoding	HIT000192534		H-invDB	288	chr13	+	26979087	26979374	GTGCCCTTACTTCAGCAAAGGAGAAGGAGTAGGAGAGCCTTAGAATTTTTGAGGAAAAAA	intergenic
ASHG19A3A000065	35.0854	26.9444	24.4562	43.8404	26.3903	12.5245	21.0595	5.29109	4.98818	4.83915	5.29547	4.60447	3.40757	4.10711	A	P	P	P	P	A	P	noncoding	ENST00000366181	RP11-296A18.3	Ensembl	2366	chr1	-	51660766	51700768	ACCACCTGGGAAGACAAGTAATCAGGTCCAGCTTCGGTGTGAGGCCCTCAATCCAGAACA	intergenic
ASHG19A3A038136	98.6713	100.441	79.2374	224.959	76.8453	33.2583	87.5874	6.74259	6.7591	6.46869	7.75321	6.21005	4.92841	6.2732	P	P	P	P	P	P	P	noncoding	ENST00000411431	RP11-569A11.2	Ensembl	365	chr1	+	202601555	202602039	TTTCCCTGTTCTGGATGTGCTTCCTCTTCTATAAACTAGAGACGCTACAAATTCCCACCA	intronic antisense	NM_177402	SYT2	synaptotagmin-2	-	202559724	202679551
ASHG19A3A038136	98.6713	100.441	79.2374	224.959	76.8453	33.2583	87.5874	6.74259	6.7591	6.46869	7.75321	6.21005	4.92841	6.2732	P	P	P	P	P	P	P	noncoding	ENST00000411431	RP11-569A11.2	Ensembl	365	chr1	+	202601555	202602039	TTTCCCTGTTCTGGATGTGCTTCCTCTTCTATAAACTAGAGACGCTACAAATTCCCACCA	intronic antisense	NM_001136504	SYT2	synaptotagmin-2	-	202559724	202612581
ASHG19A3A022860	383.589	370.531	367.084	511.014	529.895	511.825	484.124	8.58227	8.53078	8.56485	9.02217	9.13485	9.04291	8.87051	P	P	P	P	P	P	P	noncoding	ENST00000473150	KRT8P25	Ensembl	1456	chr3	+	87372417	87373873	TACAAAGATGGAGATCTCTGAGATGAATGGGAACATCAACTGGCTCCAGGCTGAGATAGA	intergenic
ASHG19A3L0002833	5063.3	5000.23	4635.31	3956.19	1432.42	1593.65	1394.94	12.1314	12.135	12.0744	12.0611	10.624	10.7423	10.4811	P	P	P	P	P	P	P	noncoding	chrX:118607438-118617354+	lincRNA-CXorf56-3	lincRNA	9917	chrX	+	118607438	118617354	ATGGGACAAATCTTGGCTCAACAATATCATACTTTGCATTTCTCCCCCGAGTCACACACG	intergenic
ASHG19A3A030461	28.0411	25.5465	39.6017	48.8545	28.4894	22.4885	23.0336	4.9726	4.91398	5.50718	5.45781	4.72442	4.34345	4.25112	A	P	P	P	P	P	P	noncoding	uc009wlc.2	LOC728855	UCSC_knowngene	1230	chr1	+	149576452	149672983	TCGACTAATCGTGTTGTTCCACGTTAGAAACGCTTGCATTGCCTGACTCTGAAACCAGAA	intergenic
ASHG19A3A038372	3935	3625.26	3543.21	1205.77	1229.08	1227.02	1309.31	11.773	11.6659	11.6978	10.3183	10.3825	10.3625	10.3958	P	P	P	P	P	P	P	noncoding	ENST00000449745	RP11-284P20.2	Ensembl	1735	chr9	+	13986173	13987908	AAGAAGTGGGAGAAGTACCTGTACCAGAAGATCATGTTTGGCAAGAGGCGAAAAATCCGA	intergenic
ASHG19A3A050248	133.026	105.876	123.424	129.597	75.746	62.7231	58.7654	7.14257	6.82855	7.07651	6.9143	6.19033	5.88346	5.678	P	P	P	P	P	P	P	noncoding	ENST00000427086	RP11-429G17.1	Ensembl	527	chr13	+	62379282	62379809	TGAGGACTCAAGACAGTGTTTAATGAAGTTATCCCATCAGCTGTCTGCCCACTCCATAAA	intergenic
ASHG19A3A039998	411.931	385.582	353.269	235.382	211.253	215.525	193.711	8.67461	8.57988	8.50736	7.82443	7.73104	7.72695	7.47798	P	P	P	P	P	P	P	noncoding	ENST00000426799	RP11-314A15.2	Ensembl	995	chrX	-	65041096	65042091	CTTCGCTCCTTAGCAGATGACAATAACCTGAATTTTCTATTTGCTCCTCTTAGCAAAAAA	intergenic
ASHG19A3A012783	524.101	530.12	546.113	460.976	365.754	361.081	310.076	8.98844	8.99686	9.08404	8.85807	8.5499	8.50195	8.19392	P	P	P	P	P	P	P	noncoding	ENST00000425131	AC092066.6	Ensembl	317	chr19	+	45268404	45268721	TGGCATCAGATACATCCCCAATCATAGGCCCCTGGAATAGTGGCGAGCCCTGCTTACTCA	intergenic
ASHG19A3L0001175	219.475	186.796	197.946	114.587	91.5707	90.6463	106.237	7.82204	7.60039	7.71704	6.72858	6.46787	6.42318	6.56509	P	P	P	P	P	P	P	noncoding	CR625452		misc_RNA	1765	chr2	-	240321577	240323342	TAACTTGAGGCAGCTGATATGAGTGTTTTCTTTATTGCATGTTGTAAATTGACCTGCTGT	exon sense-overlapping	NM_006037	HDAC4	histone deacetylase 4	-	239969863	240322643
ASHG19A3A023200	42.9047	22.5834	35.4476	239.013	242.278	226.769	255.007	5.56715	4.75476	5.35254	7.84821	7.94257	7.80445	7.8997	A	P	P	P	P	P	P	noncoding	ENST00000419531	RP4-794H19.2	Ensembl	2273	chr1	+	59250831	59366668	CCAATTCTGATCACTGCTCTTATGGTTTGTAATACATTATTTTGGGTTTGGATGATCCTG	intergenic
ASHG19A3L0003159	22.9463	12.3357	15.7353	23.3296	20.4785	8.53643	17.3453	4.68976	4.01585	4.23806	4.33961	4.23194	2.84851	3.80091	A	P	A	P	P	A	P	noncoding	chr13:48735312-48742445-	lincRNA-MED4-1	lincRNA	7134	chr13	-	48735312	48742445	AGCCCATTGAGTAAAAAAGTCCAGCTCACTGACACGACTCTATTCTCAAGTAAAATATTA	intergenic
ASHG19A3A018537	69.694	60.1421	58.6814	230.095	212.362	217.428	268.839	6.25466	6.05433	6.05085	7.79137	7.73695	7.74258	7.9773	P	P	P	P	P	P	P	noncoding	ENST00000487421	RP11-157P1.5	Ensembl	612	chr20	+	60928068	60931536	CAGCTCAGCTGCCAGTGCTGACCTTTCCGCTGCTACATGGTTCTGTGCAGAAAGAAAAAA	natural antisense	NM_005560	LAMA5	laminin subunit alpha-5 precursor	-	60884120	60942368
ASHG19A3A027680	1286.05	1199.14	1174.92	4868.45	4623.13	4774.6	5023.9	10.2008	10.111	10.1324	12.3726	12.3156	12.3332	12.3409	P	P	P	P	M	P	P	noncoding	AF086367		misc_RNA	630	chr5	-	169673244	169673861	TCATACACTTGCCATTAGTGACGTAAGTTAAGCCATTCTTCAAAACATTAAACAGCCTTC	intergenic
ASHG19A3A046818	56.0662	59.8899	57.5845	44.6828	32.542	36.3616	49.5189	5.94627	6.04806	6.02405	5.32661	4.92195	5.06633	5.41765	P	P	P	P	M	M	M	noncoding	AL050189		NRED	2114	chr11	+	85371884	85375268	TCTTATACTACCTTTTAAAATAAAGCAGGAAATGTGGCCAGCAGCTGGTCCCGTCTCTTC	natural antisense	NM_001039618	CREBZF	CREB/ATF bZIP transcription factor	-	85368607	85376182
ASHG19A3A032982	9562.17	9598.8	8916.67	4796.52	4589.36	4556.17	5038.94	13.0276	13.0519	12.9928	12.3522	12.3036	12.2751	12.3452	P	P	P	P	M	M	P	noncoding	AK094163		misc_RNA	2354	chr1	+	158067697	158070051	AACCATTGTAGGTTTTTAGCAATGTGTATCTGTGTGTCCCTCACACCTTTTCCTATTCTA	intergenic
ASHG19A3A015940	1236.47	1271.45	1166.18	1033.32	948.857	924.014	982.147	10.1363	10.1886	10.1236	10.0899	10.0059	9.93089	9.95692	P	P	P	P	P	P	P	noncoding	ENST00000431142	AC108479.2	Ensembl	427	chr2	+	88272174	88272601	ATCAACTTGTTGGCCTATCATGGGGCATGCCATGGGGCTGGTCCTTTCCCTACCGGTTCA	intronic antisense	NM_001024457	RGPD1	RANBP2-like and GRIP domain-containing protein	-	88055478	88285309
ASHG19A3L0000665	30.5716	23.1966	31.2259	41.4848	34.0956	32.1713	43.0794	5.0935	4.79197	5.18055	5.2085	4.99053	4.88175	5.2123	A	P	P	P	P	P	P	noncoding	chr13:69265749-69290074+	lincRNA-KLHL1-1	lincRNA	24326	chr13	+	69265749	69290074	AACCATAATGGACTATTATCAGGCATTGATATTTGATTCAGCTTGTCCTGCTGGCTTAGG	intergenic
ASHG19A3A052239	8.68195	8.10114	12.7958	29.3241	33.0977	22.4636	34.8586	3.32537	3.54417	3.95071	4.6891	4.94424	4.3412	4.88934	A	A	A	P	P	P	P	noncoding	uc002ale.1	AK125516	UCSC_knowngene	2978	chr15	-	63124322	63127596	ACAAGTAGAACATTTTCTGTCCACATCCAGAGGGAGAAGCCACAGGAGGAAATACCTTGA	natural antisense	NM_015059	TLN2	talin-2	+	62939509	63136829
ASHG19A3A032825	140.616	130.171	144.402	18.193	49.2504	35.1208	41.2453	7.21986	7.11244	7.29046	3.95723	5.54127	5.01291	5.14747	P	P	P	P	P	P	P	noncoding	ENST00000452941	RP11-339F13.1	Ensembl	448	chr7	-	55327501	55327949	GCAGATATTGATGGAGACAGACAAGTTGATTATGAAGAATTAATACAGATGATGACTGCA	intergenic
ASHG19A3A052484	23.6847	9.35014	14.5114	19.2959	43.8979	16.3061	43.3412	4.73359	3.69814	4.11844	4.04837	5.36878	3.84018	5.22123	A	P	A	P	P	P	P	noncoding	uc002bjk.1	BC044934	UCSC_knowngene	1261	chr15	-	83626881	83654620	AGGACACAGACTGGCTCAAAATAGGTGCTCAGTTAAGATTAAATAAATGGGTAGGCCGGG	bidirectional	NM_031452	FAM103A1	hypothetical protein LOC83640	+	83654994	83659423
ASHG19A3A055053	547.861	558.332	533.785	895.1	942.659	950.633	886.457	9.04678	9.06706	9.0524	9.87949	9.99716	9.97727	9.80084	P	P	P	P	P	P	P	noncoding	U23864		misc_RNA	124	chr8	+	144900687	144903822	TCTCCAAAGCCCATTGTCACTGCTGCCACCTGCAGGTTGGTGAGCTGCTGCTGCTGGTGC	natural antisense	NM_001136033	PUF60	poly(U)-binding-splicing factor PUF60 isoform c	-	144898552	144911196
ASHG19A3A055053	547.861	558.332	533.785	895.1	942.659	950.633	886.457	9.04678	9.06706	9.0524	9.87949	9.99716	9.97727	9.80084	P	P	P	P	P	P	P	noncoding	U23864		misc_RNA	124	chr8	+	144900687	144903822	TCTCCAAAGCCCATTGTCACTGCTGCCACCTGCAGGTTGGTGAGCTGCTGCTGCTGGTGC	natural antisense	NM_014281	PUF60	poly(U)-binding-splicing factor PUF60 isoform b	-	144898546	144911537
ASHG19A3A055053	547.861	558.332	533.785	895.1	942.659	950.633	886.457	9.04678	9.06706	9.0524	9.87949	9.99716	9.97727	9.80084	P	P	P	P	P	P	P	noncoding	U23864		misc_RNA	124	chr8	+	144900687	144903822	TCTCCAAAGCCCATTGTCACTGCTGCCACCTGCAGGTTGGTGAGCTGCTGCTGCTGGTGC	natural antisense	NM_078480	PUF60	poly(U)-binding-splicing factor PUF60 isoform a	-	144898546	144911537
ASHG19A3A031255	180.235	175.431	196.059	165.707	285.456	193.922	313.933	7.5563	7.5159	7.70455	7.29127	8.1908	7.56933	8.21315	P	P	P	P	P	P	P	noncoding	ENST00000442150	XXbac-BPG27H4.7	Ensembl	738	chr6	+	30670843	30680961	TCTTTATATGTATAATGGCTGACCCTGGCGGGACTTCCTTCTCCACTTGTGTGTTGATGT	natural antisense	NM_014641	MDC1	mediator of DNA damage checkpoint protein 1	-	30667583	30685458
ASHG19A3A000070	43.5001	12.1442	20.7199	15.9483	12.5528	12.7512	67.2394	5.58791	3.99887	4.61667	3.74889	3.4506	3.4353	5.87976	A	P	P	P	A	A	P	noncoding	ENST00000380334	CA5BP	Ensembl	889	chrX	+	15693668	15721472	GATGTGTAGCCAGAGCGCAGAGCAGTGCATCCACTCTGGGAGAGCGTGGACCTGGTTCCT	intergenic
ASHG19A3A049330	24.9228	10.0422	18.3109	18.6761	30.3212	14.3665	34.7943	4.80914	3.77805	4.44215	3.99803	4.81622	3.6359	4.88683	A	P	P	P	P	P	P	noncoding	ENST00000447435	RP11-467D10.2	Ensembl	418	chr13	-	26437387	26437805	TTTGCTCATTTCTACAGAGTAAGTAAAGCAGAGATAGCAGCCAGGTGTGCCATGAACAGG	intronic antisense	NM_016529	ATP8A2	probable phospholipid-transporting ATPase IB	+	25946208	26595420
ASHG19A3A025459	17.4878	7.9219	11.9432	15.7152	32.8522	18.8499	29.5062	4.28946	3.5233	3.85759	3.72756	4.93325	4.06919	4.63471	A	A	A	P	P	P	P	noncoding	NR_026988	LOC339524	RefSeq_NR	3125	chr1	+	87595447	87602350	AATAAGCAACAGGCAGCTTCCTTTCTTGACAGATGGAAAATAAAGGGCCTGTGCACAGCT	intergenic
ASHG19A3A010273	174.14	167.551	165.788	22.878	40.4108	25.4755	57.8365	7.51024	7.45028	7.47361	4.30925	5.24532	4.53115	5.65509	P	P	P	P	P	P	P	noncoding	AK024944		NRED	2357	chr1	-	205578843	205581144	CAATGCAGGTCTCTGTGCAGAAATCTGGGGCTCTAAATGAATTACCAAACCAATAGGAAA	intergenic
ASHG19A3A034440	445.069	470.629	432.111	57.9366	49.3389	54.1123	67.4459	8.78417	8.84697	8.77553	5.71239	5.54404	5.66366	5.88346	P	P	P	P	P	P	P	noncoding	ENST00000453697	RP11-321E8.1	Ensembl	763	chr7	+	63894207	63894970	AGGTCTTGCTCTCAAATTTTTCTGTATTCTACTACGAAATTCTTAATTCCCCTGACCATG	intergenic
ASHG19A3A009662	190.733	161.045	172.103	77.6105	94.727	77.2239	120.447	7.63849	7.39986	7.52678	6.15703	6.524	6.18849	6.75808	P	P	P	P	P	P	P	noncoding	ENST00000502398	RP11-463M16.5	Ensembl	195	chr17	+	46958483	46958678	AAGTGCAACTGGCCAGCAGTCACACAGCTCCATGACTCCAAGGTTGAGTTCCTGCTGCCT	intergenic
ASHG19A3A038728	176.179	150.951	141.486	15.4033	6.62573	16.6706	20.7143	7.52491	7.30975	7.26354	3.69335	2.62446	3.87626	4.08028	P	P	P	P	A	P	P	noncoding	ENST00000456472	RP11-250H24.4	Ensembl	1187	chr9	+	69501017	69502204	GCAACCAGCATTTAGAGCTGTTTTTGAAGCACTCAGAAATTGTTCTTTTAAGATGACAAT	intergenic
ASHG19A3A024199	7887.19	8171.37	7498.34	5662.17	5585.98	5596.4	5787.75	12.7608	12.827	12.7383	12.5998	12.6177	12.5869	12.5598	P	P	P	P	P	P	P	noncoding	uc003hay.2	AK096319	UCSC_knowngene	3518	chr4	-	56294073	56297591	CACCTGCTTCATGTGGCACATAACTTGTAAGAATCACATTTTGGATTTTAAAGAAAGACT	intergenic
ASHG19A3A040508	234.939	164.771	253.179	129.607	411.05	125.897	522.019	7.91571	7.43054	8.04206	6.91438	8.72955	6.91842	8.98812	P	P	P	P	P	P	P	noncoding	uc010nta.2	LW-1	UCSC_knowngene	2329	chrX	-	148674182	148676975	TTGCCACAACTTCGATAAAGAGCTTCTTCCGCCAGCTAAACTTGTATGGCTTCCGAAAAC	exon sense-overlapping	NM_016153	HSFX1	heat shock transcription factor, X-linked	-	148674182	148676974
ASHG19A3A040508	234.939	164.771	253.179	129.607	411.05	125.897	522.019	7.91571	7.43054	8.04206	6.91438	8.72955	6.91842	8.98812	P	P	P	P	P	P	P	noncoding	uc010nta.2	LW-1	UCSC_knowngene	2329	chrX	-	148674182	148676975	TTGCCACAACTTCGATAAAGAGCTTCTTCCGCCAGCTAAACTTGTATGGCTTCCGAAAAC	exon sense-overlapping	NM_001164415	HSFX2	heat shock transcription factor, X-linked	-	148674171	148676974
ASHG19A3A008218	160.822	148.216	158.777	271.828	368.449	274.689	415.878	7.40245	7.28533	7.41362	8.04485	8.56201	8.10225	8.63264	P	P	P	P	P	P	P	noncoding	AB007979		NRED	5596	chr1	-	175284332	175289747	AGGTTTAGAATCTATGTGAGTCTATTTTGGTTAACACACAGGCTCCTCCTTCCAATCATT	intergenic
ASHG19A3A054709	416.694	401.859	381.234	485.05	494.233	479.037	494.8	8.69355	8.63892	8.61847	8.93751	9.02449	8.94018	8.9091	P	M	P	P	P	P	P	noncoding	ENST00000400979	RP11-7G12.2	Ensembl	1969	chr1	-	166244865	166246834	AAAGATTTTCAAGGGAGCAAACTTAAAGTCTCTCTTGCTCGGAAGAGGCCTCCAGTGAAC	intergenic
ASHG19A3A033064	52.4568	47.2727	61.7336	46.6385	69.4123	49.0212	68.5606	5.84975	5.73658	6.12139	5.38807	6.06214	5.51517	5.91024	P	P	P	P	P	P	P	noncoding	ENST00000445314	AC007000.12	Ensembl	939	chr7	-	76682094	76688755	TTCCAGAAACTTCGGTTCCAGTTCTTCTGTTCCATGAGCGGCAGGGCTTGGGTTTCCCGG	intergenic
ASHG19A3A052268	846.256	888.309	832.026	779.791	817.557	774.407	866.125	9.6299	9.70463	9.6678	9.66345	9.77877	9.66706	9.76426	P	P	P	P	P	P	P	noncoding	AK021773		misc_RNA	1839	chr15	-	65244282	65248504	ATAAGAAATTTCAGCTTCTCAGTCCCTCTAGCCAACATTTCAGGTGCATGACAGCCTCAG	intronic antisense	NM_182703	ANKDD1A	ankyrin repeat and death domain-containing	+	65204100	65251041
ASHG19A3A045395	869.38	833.573	796.354	269.144	252.301	271.544	268.842	9.66489	9.62045	9.60576	8.02959	8.01133	8.08441	7.97752	P	P	P	P	P	P	P	noncoding	ENST00000435986	RP11-183G22.2	Ensembl	653	chr1	-	50864496	50865445	GAAAATCTATATCCCCCCTAAAGGGGAGACAAAAAAGAAGTTCAAGTCCAATGCACCCAA	intergenic
ASHG19A3A025838	94.8728	84.9669	82.8724	163.276	164.035	141.134	185.465	6.68541	6.52472	6.5319	7.26676	7.34802	7.08706	7.40747	P	P	P	P	P	P	P	noncoding	AL080072		NRED	1322	chr1	+	92654807	92656269	TTGCATTCTAACAGGTTATGATGAATGGAAAGCTGATGGTTCCTGGTTGGAAAAAAGATA	intergenic
ASHG19A3A034004	320.645	353.698	340.698	256.498	310.384	270.397	337.845	8.33492	8.46115	8.45761	7.95816	8.30968	8.07641	8.31798	P	P	P	P	P	P	P	noncoding	ENST00000419463	AC019117.1	Ensembl	837	chr7	+	17414490	17506288	ATAACATGAAGTGAAGTCTTCATCTCCATTCCCAACAGTCCCCATTCTACTTGCAGAAAG	intergenic
ASHG19A3A051626	21579.5	20843	20922.5	7607.51	7606.75	8113.07	8045.8	14.1426	14.1335	14.182	13.0351	13.0659	13.1155	13.0365	P	P	P	P	P	P	P	noncoding	ENST00000392947	RP5-998N21.8	Ensembl	381	chr1	-	149424564	149424954	CCGGAAGTGCCTTTTTCCAGAAGGTATTTGAAATATCTCACCAAAAAATATTTGAAGAAC	intergenic
ASHG19A3A038623	15.5547	10.7138	13.5909	29.6828	20.2407	27.2967	24.4042	4.12707	3.84863	4.02997	4.70741	4.21414	4.63471	4.34325	A	A	A	P	P	P	P	noncoding	uc010mmw.2	AK310876	UCSC_knowngene	1261	chr9	+	42771707	42782612	CAGCATCCAGAAAATATTCTCTGCTCTCAAGGAATTATGAGATTAGACTGGCTCACCAAG	intergenic
ASHG19A3A040875	26.5082	23.0105	38.8694	9.79014	10.9341	13.8925	23.2811	4.89967	4.78074	5.48467	2.9979	3.22859	3.57558	4.26926	A	P	P	P	A	P	A	noncoding	ENST00000411879	RP1-154K9.2	Ensembl	895	chrX	+	42111711	42558542	CCTTGGAGCAGAAAGTGAAAGTGTTCTGGAGCCAAAAGTAGTAACAAAGATGGAGGGCAA	intergenic
ASHG19A3A049554	22.9754	23.5852	23.1906	14.491	25.8298	32.086	27.413	4.69156	4.81327	4.76386	3.59468	4.57043	4.87809	4.51675	A	P	P	P	P	P	P	noncoding	ENST00000452288	RP11-165D7.3	Ensembl	413	chr13	-	49144774	49147453	TTTCATTATTTTCCTGAAGAATTACCACTACCCTTTGAGGTGAACCCCTAAGCTGGGATG	intergenic
ASHG19A3A049264	100.701	130.422	107.472	84.8636	152.187	154.244	158.509	6.76904	7.11484	6.8879	6.29418	7.2345	7.22425	7.17163	P	P	P	P	P	P	P	noncoding	ENST00000435385	RP11-523H24.5	Ensembl	499	chr13	-	20392260	20392759	ACCGTTTCATCACCAAGGAGGCATCTTCTCCCACTGGACCAAGAGGAAGCCTGTCCTGGA	intergenic
ASHG19A3A030634	434.16	575.157	470.212	354.673	442.24	519.464	536.463	8.75056	9.10726	8.8832	8.4565	8.84945	9.06378	9.03058	P	P	P	P	P	P	P	noncoding	ENST00000446115	RP11-439L18.3	Ensembl	783	chr6	-	143288169	143343090	GCAGCAACATCAGAAAGCCCCTCTGCTGTGCTTCAGGATCACTCTTATCACTGCATAAAG	intergenic
ASHG19A3A018330	67.4065	79.8641	62.7423	55.8567	86.7268	119.418	139.851	6.20761	6.43993	6.1426	5.655	6.38765	6.83856	6.98348	P	P	P	P	P	P	P	noncoding	ENST00000412519	RP4-753D4.2	Ensembl	1586	chr20	+	41597382	41600132	GTCTCTCGGCCAGCTATACTTGCCTCTGCTCAACAATGATGATTTGAACGTACATGTACA	intronic antisense	NM_007050	PTPRT	receptor-type tyrosine-protein phosphatase T	-	40701391	41818557
ASHG19A3A018330	67.4065	79.8641	62.7423	55.8567	86.7268	119.418	139.851	6.20761	6.43993	6.1426	5.655	6.38765	6.83856	6.98348	P	P	P	P	P	P	P	noncoding	ENST00000412519	RP4-753D4.2	Ensembl	1586	chr20	+	41597382	41600132	GTCTCTCGGCCAGCTATACTTGCCTCTGCTCAACAATGATGATTTGAACGTACATGTACA	intronic antisense	NM_133170	PTPRT	receptor-type tyrosine-protein phosphatase T	-	40701391	41818557
ASHG19A3A019003	71.3735	102	78.5766	46.5268	64.8087	73.745	89.8721	6.29117	6.77971	6.45349	5.38299	5.95807	6.12479	6.31123	P	P	P	M	M	M	M	noncoding	ENST00000446475	BX322563.3	Ensembl	552	chr21	-	46827300	46829980	CTGAAATTCAAAACTATCTTCCAAAGTCCTTGCATCTGAATCCTGAAGACTCCCCAGTGG	intronic antisense	NM_130445	COL18A1	collagen alpha-1(XVIII) chain isoform 2	+	46825096	46933634
ASHG19A3L0001732	36.0834	47.9925	35.6231	32.8444	15.1239	240.708	18.5697	5.32828	5.75493	5.35981	4.85833	3.75599	7.8956	3.90909	P	P	P	P	A	M	P	noncoding	chr6:137421307-137441782-	lincRNA-IL20RA	lincRNA	20476	chr6	-	137421307	137441782	AAATTAGCAGAAGATTATGCACGGCCAGCTGTACCATGGAACTGCCCAGGTTTTATACCA	intergenic
ASHG19A3A038531	1151.63	1685.27	942.402	817.065	388.841	1062.49	321.56	10.0463	10.5729	9.8304	9.73709	8.6443	10.1514	8.24512	P	P	P	P	P	P	P	noncoding	BC042185		RNAdb	964	chr9	+	35646266	35647470	GGTTCCTCCTCTGTGGCTTCCTGTGGCACTCCAAGTGGGAAGAAGAGAAGCTTGGAAGTG	intergenic
ASHG19A3A011831	1046.75	661.476	809.594	4076.2	2757.17	2157.06	2603.28	9.92039	9.30047	9.62769	12.1046	11.5712	11.1817	11.3928	P	P	P	P	P	P	P	noncoding	ENST00000506567	AC010492.4	Ensembl	219	chr19	-	54749952	54751181	TTGTCCTGCCGCTCGTCCTCCTCCTCCAATGTCGGCGTCAGAGCAAACACAGGACATTGG	intergenic
ASHG19A3A038843	128.242	111.982	92.6785	55.2381	13.4399	25.8831	22.2548	7.09321	6.90717	6.6802	5.64076	3.55375	4.55497	4.1955	P	P	P	P	A	P	P	noncoding	ENST00000422010	RP11-15B24.4	Ensembl	599	chr9	+	85068259	85070140	TCCTTTCCGTGCTGTGCTATCATTGTTCAGGTGCTAAAGTGAAATAAATGTGTCGTCTAA	intergenic
ASHG19A3A032134	74.501	73.0167	57.1188	516.005	500.066	418.33	524.193	6.35097	6.31939	6.01287	9.03668	9.04478	8.72978	8.99583	P	P	P	P	P	P	P	noncoding	ENST00000441249	RP11-445F6.2	Ensembl	914	chr6	+	139592498	139608444	TGCCAAGGGGAAAGTGACTTTACCCACGAGAGAGATTTTTAAATATTCCCCCAACTGCTC	intronic antisense	NM_153235	TXLNB	beta-taxilin	-	139561198	139613208
ASHG19A3A029809	2184.35	2001.27	1768.61	2027.86	1943.84	1769.96	2019.42	10.9429	10.8314	10.7071	11.0865	11.0539	10.8904	11.0159	P	P	P	P	P	P	P	noncoding	AK025759		NRED	2209	chr6	-	34250999	34253191	GAGAAAATGATACCTCTCACCTTCAAATTAATCAAATAGTTTGTCCTTCTAGTCCCCTTA	intergenic
ASHG19A3A045075	66051.9	64731.2	20356.3	31229	46332.6	47501.8	45976.1	15.7364	15.744	14.1414	15.1349	15.6848	15.7244	15.5998	P	P	A	P	P	P	P	noncoding	ENST00000478433	RP5-916O11.1	Ensembl	450	chr11	-	36018775	36019225	ATGTGGCACTGATCTTTAGCCAGAGAACTCTCTGAAACCACTAAAGAGATCCTGGGAACT	intronic antisense	NM_174902	LDLRAD3	low-density lipoprotein receptor class A	+	35965611	36252841
ASHG19A3L0001674	115.926	125.146	59.9504	151.435	67.3813	128.934	77.6725	6.9586	7.05663	6.07834	7.15103	6.01848	6.95066	6.09591	P	P	P	P	P	P	P	noncoding	chr5:67675269-67719019-	lincRNA-PIK3R1-3	lincRNA	43751	chr5	-	67675269	67719019	AACCTTCCTCCTGGTTGAAGTTAAATGGTGCTTTAGACTCAAGAAGATCTGGGTTTGAAC	intergenic
ASHG19A3A045584	9349.14	9124.8	7947.19	4189.95	4066.43	3785.76	4439.32	13.0008	12.9785	12.8219	12.1473	12.1424	11.996	12.1663	P	P	P	P	P	P	P	noncoding	ENST00000455818	NDUFB11P1	Ensembl	496	chr11	-	92069197	92069693	AAGGACCCCATTTTGGACATCTGGAACATGTGAGTTGTCTTCTTCTTTGGCGTCTCCATT	intergenic
ASHG19A3A039231	214.63	237.704	183.568	1135.03	250.733	168.402	241.434	7.79119	7.92508	7.61839	10.2325	7.99926	7.35424	7.81429	P	P	P	P	P	P	P	noncoding	ENST00000438380	RP11-175D17.3	Ensembl	617	chr9	+	127532401	127535206	TCTCCCTGCCGCTGCGGGACAAATTGGACCGGAGATTAAAGGACCGGAGTTTAACTCGAG	intronic antisense	NM_001489	NR6A1	nuclear receptor subfamily 6 group A member 1	-	127284702	127533576
ASHG19A3A039231	214.63	237.704	183.568	1135.03	250.733	168.402	241.434	7.79119	7.92508	7.61839	10.2325	7.99926	7.35424	7.81429	P	P	P	P	P	P	P	noncoding	ENST00000438380	RP11-175D17.3	Ensembl	617	chr9	+	127532401	127535206	TCTCCCTGCCGCTGCGGGACAAATTGGACCGGAGATTAAAGGACCGGAGTTTAACTCGAG	intronic antisense	NM_033334	NR6A1	nuclear receptor subfamily 6 group A member 1	-	127284702	127533576
ASHG19A3A015507	52.6407	42.1989	27.8178	33.3301	48.0373	45.6837	47.6932	5.85476	5.58375	5.02283	4.87932	5.50641	5.40931	5.36508	P	P	P	P	P	P	P	noncoding	ENST00000366209	AC009499.1	Ensembl	779	chr2	+	33931952	34522820	ATATTGACGCTGAGACCCATGGGATGTAGGAGTGCTGAGCACATTTGCAAGACATAAAGA	intergenic
ASHG19A3A053979	13.9766	9.51664	12.1247	78.3943	95.7214	89.7773	81.09	3.98343	3.71913	3.87444	6.1735	6.53808	6.40973	6.16322	A	A	A	P	P	P	P	noncoding	uc002fft.1	AK093002	UCSC_knowngene	2211	chr16	-	80862639	80926493	TGCCTGCAGGAGACAAGGTCAGAGATGTTGCTAATAATGGAGAATAAAGGATGCATTCTC	intergenic
ASHG19A3A012451	317.004	285.272	277.557	17.2996	9.4699	12.056	20.7338	8.31879	8.16534	8.17401	3.87702	3.03608	3.34897	4.08167	P	P	P	P	A	A	P	noncoding	NR_027130	ZNF738	RefSeq_NR	11734	chr19	+	21541734	21571383	CTGTCCTGAAAAATTTTTGTTGAGAATCCACTGGCTATCTCATAAGAGTATTCTTGCAAA	intergenic
ASHG19A3A039098	9.55737	12.4342	9.4737	23.1088	27.266	23.8569	32.9191	3.45964	4.02562	3.54726	4.32436	4.65571	4.43571	4.80196	A	A	A	P	P	P	P	noncoding	AF086175		RNAdb	637	chr9	+	111781215	111781842	CAACACCAATCTCGTAACACTGGGAAAACTGCATACAATATTTAGAAGGAACACTAATAC	natural antisense	NM_032012	C9orf5	transmembrane protein C9orf5	-	111777414	111882225
ASHG19A3A015707	33081.5	31477.1	31638.8	11378.8	10842.8	12007.7	11893	14.7681	14.7248	14.7896	13.6299	13.5883	13.7062	13.6258	P	P	P	P	P	P	P	noncoding	ENST00000414975	RP11-681L4.1	Ensembl	361	chr2	+	62083829	62084190	ACTGTGGTTACCTGTATACCTGTTACCACTTTCAAAAATCTAGATAGTCAGTGTGGATGA	intergenic
ASHG19A3A009423	186.807	199.015	151.372	378.169	409.316	338.288	393.205	7.60945	7.68707	7.35393	8.54772	8.72174	8.4027	8.54689	P	P	P	P	P	P	P	noncoding	AK022182		misc_RNA	2893	chr17	+	34604166	34620584	AAGCCTGTGCCAAATACCAACGCTGCAGCATTAAGGAATGTGATAGAAAAGATTCTGAAT	intergenic
ASHG19A3A046506	63.9921	51.1236	62.8741	62.7705	32.421	30.1521	34.0915	6.12735	5.84054	6.1455	5.83422	4.91607	4.7873	4.85385	P	P	P	P	P	P	P	noncoding	AF083120		misc_RNA	158	chr11	+	62321164	62321291	TACCAAGCTACCCTTACCAAGCTACGGGTGCAGGAAGCCTTTAGATGCCTCGCTCTCCCT	intergenic
ASHG19A3L0002482	38.3468	26.6382	25.8477	22.8104	15.8149	9.87681	11.6556	5.40931	4.97336	4.92062	4.30366	3.82485	3.05468	3.1551	A	P	P	A	P	A	M	noncoding	AI432427	lincRNA-CA6	lincRNA	619	chr1	+	8906748	9229411	AATGGGTGGTGCCGCAGGAGAACTCATCTCAGTGGATTCTGCATTTGAATATGGAATACA	intron sense-overlapping	NM_001215	CA6	carbonic anhydrase 6 precursor	+	9005921	9035148
ASHG19A3L0002482	38.3468	26.6382	25.8477	22.8104	15.8149	9.87681	11.6556	5.40931	4.97336	4.92062	4.30366	3.82485	3.05468	3.1551	A	P	P	A	P	A	M	noncoding	AI432427	lincRNA-CA6	lincRNA	619	chr1	+	8906748	9229411	AATGGGTGGTGCCGCAGGAGAACTCATCTCAGTGGATTCTGCATTTGAATATGGAATACA	intronic antisense	NM_024980	GPR157	probable G-protein coupled receptor 157	-	9164475	9189229
ASHG19A3L0002482	38.3468	26.6382	25.8477	22.8104	15.8149	9.87681	11.6556	5.40931	4.97336	4.92062	4.30366	3.82485	3.05468	3.1551	A	P	P	A	P	A	M	noncoding	AI432427	lincRNA-CA6	lincRNA	619	chr1	+	8906748	9229411	AATGGGTGGTGCCGCAGGAGAACTCATCTCAGTGGATTCTGCATTTGAATATGGAATACA	intronic antisense	NM_207420	SLC2A7	solute carrier family 2, facilitated glucose	-	9063358	9086404
ASHG19A3L0002482	38.3468	26.6382	25.8477	22.8104	15.8149	9.87681	11.6556	5.40931	4.97336	4.92062	4.30366	3.82485	3.05468	3.1551	A	P	P	A	P	A	M	noncoding	AI432427	lincRNA-CA6	lincRNA	619	chr1	+	8906748	9229411	AATGGGTGGTGCCGCAGGAGAACTCATCTCAGTGGATTCTGCATTTGAATATGGAATACA	intronic antisense	NM_001201483	ENO1	c-myc promoter-binding protein-1 isoform MBP-1	-	8921058	8931635
ASHG19A3L0002482	38.3468	26.6382	25.8477	22.8104	15.8149	9.87681	11.6556	5.40931	4.97336	4.92062	4.30366	3.82485	3.05468	3.1551	A	P	P	A	P	A	M	noncoding	AI432427	lincRNA-CA6	lincRNA	619	chr1	+	8906748	9229411	AATGGGTGGTGCCGCAGGAGAACTCATCTCAGTGGATTCTGCATTTGAATATGGAATACA	intronic antisense	NM_001428	ENO1	alpha-enolase isoform 1	-	8921058	8939151
ASHG19A3L0002482	38.3468	26.6382	25.8477	22.8104	15.8149	9.87681	11.6556	5.40931	4.97336	4.92062	4.30366	3.82485	3.05468	3.1551	A	P	P	A	P	A	M	noncoding	AI432427	lincRNA-CA6	lincRNA	619	chr1	+	8906748	9229411	AATGGGTGGTGCCGCAGGAGAACTCATCTCAGTGGATTCTGCATTTGAATATGGAATACA	intronic antisense	NM_001135585	SLC2A5	solute carrier family 2, facilitated glucose	-	9101426	9129887
ASHG19A3L0002482	38.3468	26.6382	25.8477	22.8104	15.8149	9.87681	11.6556	5.40931	4.97336	4.92062	4.30366	3.82485	3.05468	3.1551	A	P	P	A	P	A	M	noncoding	AI432427	lincRNA-CA6	lincRNA	619	chr1	+	8906748	9229411	AATGGGTGGTGCCGCAGGAGAACTCATCTCAGTGGATTCTGCATTTGAATATGGAATACA	intronic antisense	NM_003039	SLC2A5	solute carrier family 2, facilitated glucose	-	9097004	9129887
ASHG19A3A045582	253.224	268.525	244.581	148.598	115.641	145.047	146.037	8.0115	8.08746	7.99492	7.1209	6.82172	7.12912	7.05208	P	P	P	P	P	P	P	noncoding	AK094679		misc_RNA	2046	chr11	-	89921092	89923137	TAACATTTTATTTTAAAATATGTACAATGTTTTCTGATTTATTCATTACTGAATCTCAAC	intronic antisense	NM_005467	NAALAD2	N-acetylated-alpha-linked acidic dipeptidase 2	+	89867817	89925779
ASHG19A3A037781	9716.98	9383.29	8633.76	11163.1	11376.1	10572.1	12407.4	13.0531	13.023	12.9483	13.6103	13.6699	13.52	13.6841	P	P	P	P	P	P	P	noncoding	uc004axb.2	BC070371	UCSC_knowngene	1370	chr9	-	99957619	99958989	GCCAACCTAAATCTACCTCAGGTAAGTAGTTAGATTAACTTTTTCAAGATTTCAGACCAA	intergenic
ASHG19A3A026035	26552.3	25239.2	26099	7715.4	22203.7	23957.5	23487	14.4455	14.4005	14.475	13.0531	14.6229	14.7093	14.6144	P	P	P	P	P	P	P	noncoding	ENST00000512403	RP11-614F17.1	Ensembl	343	chr4	+	132689387	132689730	ATTTTAAGACTTGGTGGCTGAGAAACAACTCATCCTGGATGGCTGTGGGGCTAGATATAG	intergenic
ASHG19A3A054483	50.5412	38.3899	38.7957	69.7789	59.3315	53.5471	62.9054	5.79849	5.45713	5.48146	5.99521	5.8285	5.64943	5.78081	P	P	P	P	P	P	P	noncoding	uc002dyl.1	CR613685	UCSC_knowngene	1951	chr16	+	30538238	30541977	TAAAAAGTGGAGAGAAACTATCTAAATAAAGGCTTACAGGTGGGGCGCACTGGCTCATGT	bidirectional	NM_024671	ZNF768	zinc finger protein 768	-	30535321	30537910
ASHG19A3A020755	19003.8	18606.9	17439.5	29061.9	30700.4	31574.2	32322.5	13.9801	13.9753	13.925	15.0297	15.0849	15.1152	15.0699	P	P	P	P	P	P	P	noncoding	uc003bze.1	CR623576	UCSC_knowngene	1632	chr3	-	14984293	14985925	TTCCCATAGACTGGGGAAGCTTAATTGCCTTTACAAGTACTTATGTACAACTTTGTATCA	intergenic
CUST_290_PI426073487	30.7744	23.4674	19.2675	16.893	22.3313	14.7676	17.0797	5.10256	4.80684	4.51758	3.84179	4.35435	3.67917	3.77829	A	P	P	P	P	P	P	noncoding	uc.292+	uc.292	UCR	217	chr10	+	98715454	98715671	CTGTAAAGATTGAATTAGATCCCCAGGGAGAGGCAGCACAAAGTGCAAATGAATCAAAAA	exon sense-overlapping	NM_001170766	LCOR	ligand-dependent corepressor isoform 2	+	98592016	98724198
CUST_290_PI426073487	30.7744	23.4674	19.2675	16.893	22.3313	14.7676	17.0797	5.10256	4.80684	4.51758	3.84179	4.35435	3.67917	3.77829	A	P	P	P	P	P	P	noncoding	uc.292+	uc.292	UCR	217	chr10	+	98715454	98715671	CTGTAAAGATTGAATTAGATCCCCAGGGAGAGGCAGCACAAAGTGCAAATGAATCAAAAA	exon sense-overlapping	NM_032440	LCOR	ligand-dependent corepressor isoform 1	+	98592711	98724198
CUST_290_PI426073487	30.7744	23.4674	19.2675	16.893	22.3313	14.7676	17.0797	5.10256	4.80684	4.51758	3.84179	4.35435	3.67917	3.77829	A	P	P	P	P	P	P	noncoding	uc.292+	uc.292	UCR	217	chr10	+	98715454	98715671	CTGTAAAGATTGAATTAGATCCCCAGGGAGAGGCAGCACAAAGTGCAAATGAATCAAAAA	exon sense-overlapping	NM_001170765	LCOR	ligand-dependent corepressor isoform 1	+	98592016	98724198
ASHG19A3A034742	370.223	371.358	343.109	130.689	120.019	110.997	153.173	8.53314	8.53383	8.46833	6.92711	6.87632	6.72336	7.12424	P	P	P	P	P	P	P	noncoding	ENST00000429197	AC079781.5	Ensembl	123	chr7	+	97499478	97499601	GCTACGAAGATTGTACACAGAGGTCCAGATACATTCCGTTTTGAGAATGTCAATGGATAC	intronic antisense	NM_183356	ASNS	asparagine synthetase [glutamine-hydrolyzing]	-	97481428	97501854
ASHG19A3A034742	370.223	371.358	343.109	130.689	120.019	110.997	153.173	8.53314	8.53383	8.46833	6.92711	6.87632	6.72336	7.12424	P	P	P	P	P	P	P	noncoding	ENST00000429197	AC079781.5	Ensembl	123	chr7	+	97499478	97499601	GCTACGAAGATTGTACACAGAGGTCCAGATACATTCCGTTTTGAGAATGTCAATGGATAC	intronic antisense	NM_133436	ASNS	asparagine synthetase [glutamine-hydrolyzing]	-	97481428	97501477
ASHG19A3A034742	370.223	371.358	343.109	130.689	120.019	110.997	153.173	8.53314	8.53383	8.46833	6.92711	6.87632	6.72336	7.12424	P	P	P	P	P	P	P	noncoding	ENST00000429197	AC079781.5	Ensembl	123	chr7	+	97499478	97499601	GCTACGAAGATTGTACACAGAGGTCCAGATACATTCCGTTTTGAGAATGTCAATGGATAC	intronic antisense	NM_001178076	ASNS	asparagine synthetase [glutamine-hydrolyzing]	-	97481428	97501854
ASHG19A3A034742	370.223	371.358	343.109	130.689	120.019	110.997	153.173	8.53314	8.53383	8.46833	6.92711	6.87632	6.72336	7.12424	P	P	P	P	P	P	P	noncoding	ENST00000429197	AC079781.5	Ensembl	123	chr7	+	97499478	97499601	GCTACGAAGATTGTACACAGAGGTCCAGATACATTCCGTTTTGAGAATGTCAATGGATAC	intronic antisense	NM_001178077	ASNS	asparagine synthetase [glutamine-hydrolyzing]	-	97481428	97501477
ASHG19A3A034742	370.223	371.358	343.109	130.689	120.019	110.997	153.173	8.53314	8.53383	8.46833	6.92711	6.87632	6.72336	7.12424	P	P	P	P	P	P	P	noncoding	ENST00000429197	AC079781.5	Ensembl	123	chr7	+	97499478	97499601	GCTACGAAGATTGTACACAGAGGTCCAGATACATTCCGTTTTGAGAATGTCAATGGATAC	intronic antisense	NM_001673	ASNS	asparagine synthetase [glutamine-hydrolyzing]	-	97481428	97501854
ASHG19A3A034742	370.223	371.358	343.109	130.689	120.019	110.997	153.173	8.53314	8.53383	8.46833	6.92711	6.87632	6.72336	7.12424	P	P	P	P	P	P	P	noncoding	ENST00000429197	AC079781.5	Ensembl	123	chr7	+	97499478	97499601	GCTACGAAGATTGTACACAGAGGTCCAGATACATTCCGTTTTGAGAATGTCAATGGATAC	intronic antisense	NM_001178075	ASNS	asparagine synthetase [glutamine-hydrolyzing]	-	97481428	97501854
ASHG19A3A017808	18.4167	19.8932	28.3198	21.0585	32.6354	34.5869	43.844	4.36662	4.59982	5.04657	4.17988	4.92562	4.98905	5.23892	A	A	P	P	M	P	P	noncoding	ENST00000416237	RP5-1022J11.2	Ensembl	573	chr20	-	51104460	51117130	TCAAAAGCATCATTCAAGCCACAAGGCTCTTCTGTTCCTGGTAAAAGGCAGGCAGGAAAA	intergenic
ASHG19A3A025216	148.314	129.021	136.53	361.292	367.575	371.438	412.084	7.28845	7.10073	7.21371	8.48182	8.55777	8.54548	8.61717	P	P	P	P	P	P	P	noncoding	uc003gid.2	BC025734	UCSC_knowngene	2403	chr4	+	4543930	4712662	CTGCATCTTTTTTGTTCTTTCTGCTGTGAAAATAATTTTGTCGGAAAATGTAACCAGTGC	bidirectional	NM_016930	STX18	syntaxin-18	-	4420695	4543775
ASHG19A3A049656	741.067	684.649	636.977	154.852	154.763	145.468	172.528	9.44954	9.34809	9.30108	7.18522	7.26064	7.13335	7.2978	P	P	P	P	P	P	P	noncoding	BC047655		RNAdb	1927	chr13	-	73282505	73284417	GATTGTACAAGCATTCACTCTTTACTAGCATTTTTTGTTTTTCAGACAAGCTGAAGTGGT	exon sense-overlapping	NM_001071775	MZT1	mitotic-spindle organizing protein 1	-	73282494	73301938
ASHG19A3A023584	35.0919	31.128	27.353	24.4112	13.926	15.7815	26.6263	5.29163	5.17647	4.9992	4.40741	3.61921	3.78673	4.47226	P	M	P	P	A	P	P	noncoding	ENST00000466064	RP11-791G22.2	Ensembl	827	chr3	+	179593163	179599397	TCTTGCTTTCTGATTCCAATTCCAAGTCACAGTGGTTGGATGTTGTTGGTGAAGTGGAAA	natural antisense	NM_016559	PEX5L	PEX5-related protein	-	179518049	179754517
ASHG19A3A024396	64.9922	61.9332	53.1724	79.2892	92.9162	69.0072	116.611	6.15192	6.09624	5.91262	6.19138	6.4938	6.02606	6.70638	P	P	P	P	P	P	P	noncoding	ENST00000426775	RP3-333A15.1	Ensembl	749	chr1	+	71413061	71417176	GTATCAAAGTCAGGAGCAATTTCTTCTGTTCCCTGTATTTCAATATCTTTGCCTTTTACT	intronic antisense	NM_198716	PTGER3	prostaglandin E2 receptor EP3 subtype isoform 6	-	71318035	71513491
ASHG19A3A024396	64.9922	61.9332	53.1724	79.2892	92.9162	69.0072	116.611	6.15192	6.09624	5.91262	6.19138	6.4938	6.02606	6.70638	P	P	P	P	P	P	P	noncoding	ENST00000426775	RP3-333A15.1	Ensembl	749	chr1	+	71413061	71417176	GTATCAAAGTCAGGAGCAATTTCTTCTGTTCCCTGTATTTCAATATCTTTGCCTTTTACT	intronic antisense	NM_198717	PTGER3	prostaglandin E2 receptor EP3 subtype isoform 7	-	71318035	71513491
ASHG19A3A024396	64.9922	61.9332	53.1724	79.2892	92.9162	69.0072	116.611	6.15192	6.09624	5.91262	6.19138	6.4938	6.02606	6.70638	P	P	P	P	P	P	P	noncoding	ENST00000426775	RP3-333A15.1	Ensembl	749	chr1	+	71413061	71417176	GTATCAAAGTCAGGAGCAATTTCTTCTGTTCCCTGTATTTCAATATCTTTGCCTTTTACT	intronic antisense	NM_198714	PTGER3	prostaglandin E2 receptor EP3 subtype isoform 4	-	71318035	71513491
ASHG19A3L0003324	7.13579	8.9746	7.7981	245.718	252.01	259.568	289.585	3.08192	3.65369	3.28585	7.89013	8.00853	8.01182	8.09302	A	A	A	P	P	P	P	noncoding	DN930364	lincRNA-C6orf70-2	lincRNA	387	chr6	-	170394056	170395067	GAAGGACCTTGGTGTTGAACGACCTTGGTGAAGGACCATGGTGATGAAGGACCTTGGTGA	intergenic
ASHG19A3A050819	602.473	503.845	661.874	251.256	339.493	181.038	388.087	9.18187	8.9362	9.35161	7.92569	8.44523	7.46627	8.52953	P	P	P	P	P	P	P	noncoding	ENST00000471982	RP11-1085N6.1	Ensembl	321	chr14	-	57150138	57150459	CTAAAAGAATGCTGGCTATGAAGAGATGCAAGCGTTTTGAATGGGGAGGAGGTAAGAAGA	intergenic
ASHG19A3A048240	24756.5	25364.7	23987.1	24123.5	27229.2	26854.7	27404.3	14.3469	14.4058	14.3686	14.7361	14.9166	14.8776	14.8331	P	P	P	P	P	P	P	noncoding	ENST00000468701	RP11-476M19.1	Ensembl	347	chr12	+	3578115	3578462	AGCTATATTCCTGTGTGAGTGTGCAATTCACAGCAAAGTAGTCAGGAACAGATCTAGTGA	intergenic
ASHG19A3A040096	115.198	103.249	104.132	44.2045	40.7076	35.5578	40.2513	6.94849	6.79567	6.84185	5.30872	5.25694	5.03309	5.10783	P	P	P	P	P	P	P	noncoding	ENST00000399586	RP11-324B6.1	Ensembl	6081	chrX	-	74960665	74966746	GATAATTCTTCTAGACAAGTTTCTGAGGATGGGAAACCCAAAGGGTTCTCTTCTAATTCT	intergenic
ASHG19A3A047138	70586	71778.4	60786.1	63495.6	65056.2	39281	69012.2	15.8331	15.9163	15.707	16.1816	16.1621	15.4399	16.1911	P	P	P	P	P	P	P	noncoding	ENST00000492051	RP11-237N19.1	Ensembl	246	chr11	+	129407763	129408009	AAAGGATCTCCTTCATCCCTCTCCAGAAGACAACAAGAGGAAACACACGAAGAAGTGCTT	intergenic
ASHG19A3A035773	64.5812	54.6898	66.4118	63.3944	87.2886	51.4544	103.14	6.14198	5.92662	6.21717	5.85012	6.39688	5.58497	6.5174	P	P	P	P	P	P	P	noncoding	HIT000092079		H-invDB	680	chr8	-	55370507	55371798	ATTCTGCTGCGCCAGCCGCTTGCGCTCGTCCTTAGCCCACACCATGAAAGCGTTCATCGG	natural antisense	NM_022454	SOX17	transcription factor SOX-17	+	55370494	55373456
CUST_42_PI426075208	14242.6	11569.6	14058	11664.1	15495.5	9687.16	15709.3	13.5638	13.304	13.6174	13.6714	14.1143	13.3893	14.0282	P	P	P	P	P	P	P	noncoding	nc-HOXB13-207+	nc-HOXB13-207	HOX cluster	108	chr17	+	46806423	46806531	AGGAAGAGGGGACGAGGAGCCGGGCCCCACCTCCTTCTCCTCCTCTCCCTCCCTAGCTTT	bidirectional	NM_006361	HOXB13	homeobox protein Hox-B13	-	46802126	46806111
ASHG19A3A000010	144.828	137.452	139.208	12.4045	25.6443	18.1351	26.1148	7.25525	7.18498	7.24131	3.34006	4.55897	4.00706	4.44297	P	M	P	P	P	P	A	noncoding	AJ224166		RNAdb	785	chr5	+	138609819	138643217	AGGGATCAGCAAACTTGCTGTAAAGAGCCAGAGTTGTCTGCTGGTTCTCAGCTTGAAGAA	intron sense-overlapping	NM_001194956	MATR3	matrin-3 isoform b	+	138629438	138667366
ASHG19A3A000010	144.828	137.452	139.208	12.4045	25.6443	18.1351	26.1148	7.25525	7.18498	7.24131	3.34006	4.55897	4.00706	4.44297	P	M	P	P	P	P	A	noncoding	AJ224166		RNAdb	785	chr5	+	138609819	138643217	AGGGATCAGCAAACTTGCTGTAAAGAGCCAGAGTTGTCTGCTGGTTCTCAGCTTGAAGAA	exon sense-overlapping	NM_199189	MATR3	matrin-3 isoform a	+	138609440	138667366
ASHG19A3A000010	144.828	137.452	139.208	12.4045	25.6443	18.1351	26.1148	7.25525	7.18498	7.24131	3.34006	4.55897	4.00706	4.44297	P	M	P	P	P	P	A	noncoding	AJ224166		RNAdb	785	chr5	+	138609819	138643217	AGGGATCAGCAAACTTGCTGTAAAGAGCCAGAGTTGTCTGCTGGTTCTCAGCTTGAAGAA	exon sense-overlapping	NM_018834	MATR3	matrin-3 isoform a	+	138629332	138667366
ASHG19A3A000010	144.828	137.452	139.208	12.4045	25.6443	18.1351	26.1148	7.25525	7.18498	7.24131	3.34006	4.55897	4.00706	4.44297	P	M	P	P	P	P	A	noncoding	AJ224166		RNAdb	785	chr5	+	138609819	138643217	AGGGATCAGCAAACTTGCTGTAAAGAGCCAGAGTTGTCTGCTGGTTCTCAGCTTGAAGAA	exon sense-overlapping	NM_001194954	MATR3	matrin-3 isoform a	+	138609440	138667366
ASHG19A3A000010	144.828	137.452	139.208	12.4045	25.6443	18.1351	26.1148	7.25525	7.18498	7.24131	3.34006	4.55897	4.00706	4.44297	P	M	P	P	P	P	A	noncoding	AJ224166		RNAdb	785	chr5	+	138609819	138643217	AGGGATCAGCAAACTTGCTGTAAAGAGCCAGAGTTGTCTGCTGGTTCTCAGCTTGAAGAA	exon sense-overlapping	NM_001194955	MATR3	matrin-3 isoform a	+	138629438	138667366
ASHG19A3A015577	49.521	47.3068	50.8385	27.888	14.592	24.8268	22.4368	5.77145	5.73764	5.85235	4.61413	3.69748	4.49321	4.20781	P	P	P	P	A	P	P	noncoding	NR_027251	LOC100129726	RefSeq_NR	1698	chr2	+	43454349	43455994	GGACATGCTTGTGTACAGAGTACCTGCTAGTATAAAATGTCTAATGTAGCTGCTTTTATT	bidirectional	NM_006887	ZFP36L2	zinc finger protein 36, C3H1 type-like 2	-	43449540	43453745
ASHG19A3A035669	177.343	164.178	147.951	204.716	213.691	227.774	220.728	7.5351	7.42591	7.32329	7.60821	7.74697	7.8116	7.67264	P	P	P	P	P	P	P	noncoding	AK091440		RNAdb	3408	chr8	-	30420444	30423851	ATCACTAAACTCAACACCATCCATCAGCAAGAGGCGGAGCAAATTAAAACACCAGTAACA	natural antisense	NM_001008710	RBPMS	RNA-binding protein with multiple splicing	+	30241943	30429734
ASHG19A3A035669	177.343	164.178	147.951	204.716	213.691	227.774	220.728	7.5351	7.42591	7.32329	7.60821	7.74697	7.8116	7.67264	P	P	P	P	P	P	P	noncoding	AK091440		RNAdb	3408	chr8	-	30420444	30423851	ATCACTAAACTCAACACCATCCATCAGCAAGAGGCGGAGCAAATTAAAACACCAGTAACA	natural antisense	NM_006867	RBPMS	RNA-binding protein with multiple splicing	+	30241943	30429734
ASHG19A3A035669	177.343	164.178	147.951	204.716	213.691	227.774	220.728	7.5351	7.42591	7.32329	7.60821	7.74697	7.8116	7.67264	P	P	P	P	P	P	P	noncoding	AK091440		RNAdb	3408	chr8	-	30420444	30423851	ATCACTAAACTCAACACCATCCATCAGCAAGAGGCGGAGCAAATTAAAACACCAGTAACA	natural antisense	NM_001008711	RBPMS	RNA-binding protein with multiple splicing	+	30241943	30429734
ASHG19A3A047303	47.111	42.5114	44.6652	31.3344	43.8605	37.2587	54.1966	5.69975	5.59452	5.67725	4.79162	5.36788	5.1043	5.5563	P	P	P	P	P	P	P	noncoding	ENST00000420905	AC091814.3	Ensembl	3956	chr12	-	10100735	10105935	TTTTGGGATTCTACAGATTCTCACCATTAGGATTTCAGTGTCTGGCAGTCCTCTGGGAAA	intergenic
ASHG19A3A022189	58.9315	63.9207	67.6064	52.6886	101.53	76.707	128.166	6.01193	6.13724	6.24333	5.57481	6.62437	6.17841	6.84653	P	P	P	P	P	P	M	noncoding	ENST00000423193	AC090044.2	Ensembl	497	chr3	+	898806	899774	TTAAAAAGCATCACTGGCTCCTGACCAGGATTCCAGCTCCATGAACCTCAAACTAGAACA	intergenic
ASHG19A3A027755	5	5.65131	5	24.2585	18.3021	29.3261	23.2455	2.37766	2.79373	2.39437	4.39793	4.05763	4.74412	4.26577	A	A	A	P	P	P	P	noncoding	ENST00000515739	RP11-1026M7.3	Ensembl	684	chr5	-	177228204	177230345	GGAAAGCAGCTTTGTACATCATCGTGGACGAGAGTAAAGTCAAGTACGTTCTGCATATGT	intergenic
ASHG19A3A034422	16.307	13.4789	15.3058	17.6579	20.6717	21.9659	29.3143	4.19105	4.12153	4.20124	3.90869	4.24599	4.30636	4.62532	A	A	A	P	P	P	P	noncoding	ENST00000421770	CTD-2526L21.2	Ensembl	223	chr7	+	63159767	63160819	CAAGAAGCCACACTGAAGGAGGTTGACATCCTGCACAAGGTCTCAGGGCACCTCAACATC	intergenic
ASHG19A3A022192	6287.97	6992.31	6880.95	1032.05	1836.06	2014.58	2016.79	12.4393	12.5994	12.6146	10.0875	10.9734	11.0818	11.0126	P	P	P	P	P	P	P	noncoding	ENST00000415533	AC090042.1	Ensembl	405	chr3	+	1771753	1772158	GACATATGTTCCATTGACTCCTGCTATGAGGCTTTGGATGTTGCCAACAAAATTGGAATC	intergenic
ASHG19A3A025491	30.6647	40.9852	24.96	21.8026	29.4446	33.7058	31.1496	5.09783	5.54221	4.86738	4.23179	4.7728	4.9508	4.71659	P	P	P	P	P	P	P	noncoding	G36690		misc_RNA	434	chr4	+	47886344	47886778	TCCAGTTTATAAATGGTAGAACAAAGGCAGTGTAGCCTCCTTTACTTCCAATAAGGAAAT	natural antisense	NM_152995	NFXL1	NF-X1-type zinc finger protein NFXL1	-	47849257	47916633
ASHG19A3A023747	18.7363	20.0792	17.6936	15.9977	42.0443	65.7385	70.5583	4.39333	4.61085	4.39427	3.75388	5.3056	5.95558	5.94935	A	P	P	P	P	P	P	noncoding	ENST00000434369	AC069213.4	Ensembl	367	chr3	+	195070392	195070759	TGATGAGGCTGAACATTCACCAAACAAGCTCTATACATTGATTACCTATGTGTCTGTCAC	intronic antisense	NM_012287	ACAP2	arf-GAP with coiled-coil, ANK repeat and PH	-	194995464	195163817
ASHG19A3A034743	123.378	140.335	133.57	1708.28	1769.45	1764.68	1676.27	7.04227	7.21503	7.18522	10.8379	10.9144	10.8843	10.7512	P	P	P	P	P	P	P	noncoding	ENST00000413484	AC007875.3	Ensembl	514	chr7	+	97512593	97513107	ATCATAAACACAAACATTCCTCTTCACAAAGGGACCTCAAGTAACCTTAGGCTGGAGGGC	intergenic
ASHG19A3A033694	398.539	434.871	366.158	1015.28	1061.41	1055.16	990.346	8.63049	8.74383	8.56116	10.0595	10.1661	10.1403	9.96795	P	P	P	P	P	P	P	noncoding	NR_002157	OR2A9P	RefSeq_NR	985	chr7	-	143947563	143948548	AGGGCAAGTCTTCTCTCGTTTTTTGCAGATAAAATTTTAGATGTGTTGCATTCATTGGGT	intergenic
ASHG19A3A053321	35.843	45.6648	33.3321	15.283	26.886	35.5278	33.7603	5.32154	5.68759	5.26759	3.68095	4.63201	5.03177	4.83829	P	P	P	P	P	P	P	noncoding	uc010utu.1	FLJ00038	UCSC_knowngene	1905	chr15	+	102501015	102514287	TGGAAAAGCATGAGTGGGGTGATGTGCCTTAAAGCATCAGACACTTGGGCCTCGGGCATC	intergenic
ASHG19A3A032078	1708.58	1765.94	1832.1	363.59	795.048	863.915	880.659	10.5857	10.6434	10.7587	8.49311	9.73674	9.82353	9.79229	P	P	P	P	P	P	P	noncoding	ENST00000427807	RP1-248E1.2	Ensembl	1351	chr6	+	132593120	132594471	TTTGCTGTTCATGATATGAGATAGACAGCTGCTGAAGTGTCATTAGAGCAGTGGCTGCTG	intergenic
ASHG19A3A026547	17.7402	21.597	10.6893	18.5152	23.5155	22.9919	28.4413	4.3143	4.701	3.70853	3.98425	4.43055	4.3768	4.57624	A	P	A	P	P	P	P	noncoding	ENST00000503735	CTD-2042D5.1	Ensembl	313	chr5	-	13553762	13554075	AACAGGAGCTCCAGCATGGACTTGAAACTGAAAGCCCAGACCCATTTTGACATAAAGGAT	intergenic
ASHG19A3L0000058	18005.9	22476.9	18559.6	50548.9	50035.9	56343.4	60233.5	13.9066	14.2467	14.0136	15.8498	15.7905	15.9396	15.9999	P	P	P	P	P	P	P	noncoding	Y00062	lincRNA-ATP6V1G3-2	lincRNA	4597	chr1	+	198284952	198726330	GCTGTCTTTACATGGGGTTTTCAATTTTGCATGCTCGATTATTCCCTGTACAATATTTAA	intronic antisense	NM_133262	ATP6V1G3	V-type proton ATPase subunit G 3 isoform a	-	198492351	198510075
ASHG19A3L0000058	18005.9	22476.9	18559.6	50548.9	50035.9	56343.4	60233.5	13.9066	14.2467	14.0136	15.8498	15.7905	15.9396	15.9999	P	P	P	P	P	P	P	noncoding	Y00062	lincRNA-ATP6V1G3-2	lincRNA	4597	chr1	+	198284952	198726330	GCTGTCTTTACATGGGGTTTTCAATTTTGCATGCTCGATTATTCCCTGTACAATATTTAA	exon sense-overlapping	NM_080921	PTPRC	receptor-type tyrosine-protein phosphatase C	+	198608136	198726545
ASHG19A3L0000058	18005.9	22476.9	18559.6	50548.9	50035.9	56343.4	60233.5	13.9066	14.2467	14.0136	15.8498	15.7905	15.9396	15.9999	P	P	P	P	P	P	P	noncoding	Y00062	lincRNA-ATP6V1G3-2	lincRNA	4597	chr1	+	198284952	198726330	GCTGTCTTTACATGGGGTTTTCAATTTTGCATGCTCGATTATTCCCTGTACAATATTTAA	intron sense-overlapping	NM_133494	NEK7	serine/threonine-protein kinase Nek7	+	198126107	198291548
ASHG19A3L0000058	18005.9	22476.9	18559.6	50548.9	50035.9	56343.4	60233.5	13.9066	14.2467	14.0136	15.8498	15.7905	15.9396	15.9999	P	P	P	P	P	P	P	noncoding	Y00062	lincRNA-ATP6V1G3-2	lincRNA	4597	chr1	+	198284952	198726330	GCTGTCTTTACATGGGGTTTTCAATTTTGCATGCTCGATTATTCCCTGTACAATATTTAA	exon sense-overlapping	NM_080923	PTPRC	receptor-type tyrosine-protein phosphatase C	+	198608136	198662334
ASHG19A3L0000058	18005.9	22476.9	18559.6	50548.9	50035.9	56343.4	60233.5	13.9066	14.2467	14.0136	15.8498	15.7905	15.9396	15.9999	P	P	P	P	P	P	P	noncoding	Y00062	lincRNA-ATP6V1G3-2	lincRNA	4597	chr1	+	198284952	198726330	GCTGTCTTTACATGGGGTTTTCAATTTTGCATGCTCGATTATTCCCTGTACAATATTTAA	exon sense-overlapping	NM_002838	PTPRC	receptor-type tyrosine-protein phosphatase C	+	198608136	198726545
ASHG19A3L0000058	18005.9	22476.9	18559.6	50548.9	50035.9	56343.4	60233.5	13.9066	14.2467	14.0136	15.8498	15.7905	15.9396	15.9999	P	P	P	P	P	P	P	noncoding	Y00062	lincRNA-ATP6V1G3-2	lincRNA	4597	chr1	+	198284952	198726330	GCTGTCTTTACATGGGGTTTTCAATTTTGCATGCTCGATTATTCCCTGTACAATATTTAA	intronic antisense	NM_133326	ATP6V1G3	V-type proton ATPase subunit G 3 isoform b	-	198492351	198510075
ASHG19A3A044517	16609.8	15594	13257.5	9451.44	8680.2	9478.32	9452.92	13.7926	13.7204	13.5361	13.3607	13.2702	13.3498	13.2792	P	P	P	P	M	M	M	noncoding	uc001laz.2	AK000154	UCSC_knowngene	5435	chr10	+	115671514	115676949	GGTGAGAATGTGTTTATACTGTATATGGAAACCTAATGCCTCTTTTCTAAAGCTTTGTAC	exon sense-overlapping	NM_198514	NHLRC2	NHL repeat-containing protein 2	+	115614390	115672265
ASHG19A3H0000158	59.1125	29.1253	47.1372	60.436	41.0154	29.5966	43.6136	6.01698	5.08812	5.74803	5.77636	5.2704	4.75784	5.23109	A	P	P	P	P	M	M	noncoding	nc-HOXC9-132-	nc-HOXC9-132	HOX cluster	148	chr12	+	54386125	54386273	CCTTCCCCTTCTATAGCTCCATCTCCAGGGGAAGGACATGTTTGGGGTGTTGGTAGGTTA	intergenic
ASHG19A3A039435	68.7205	85.4308	60.2111	138.581	81.1014	199.523	69.7385	6.23303	6.53348	6.08438	7.0145	6.29175	7.60932	5.93381	P	P	P	P	P	P	P	noncoding	uc004cgm.2	BC101937	UCSC_knowngene	108	chr9	+	138585382	138585490	ACAGCCTGGCTGCTAGCAGGCAAAGAAGTCAGGGAAGATGCTCTCCACCTCGTCCTTCAG	natural antisense	NM_001101677	SOHLH1	spermatogenesis- and oogenesis-specific basic	-	138585254	138591374
ASHG19A3A039435	68.7205	85.4308	60.2111	138.581	81.1014	199.523	69.7385	6.23303	6.53348	6.08438	7.0145	6.29175	7.60932	5.93381	P	P	P	P	P	P	P	noncoding	uc004cgm.2	BC101937	UCSC_knowngene	108	chr9	+	138585382	138585490	ACAGCCTGGCTGCTAGCAGGCAAAGAAGTCAGGGAAGATGCTCTCCACCTCGTCCTTCAG	natural antisense	NM_001012415	SOHLH1	spermatogenesis- and oogenesis-specific basic	-	138585254	138591374
ASHG19A3A047752	21.9222	10.2798	12.5669	54.2026	42.9741	47.6956	52.5142	4.61816	3.80486	3.92552	5.61489	5.33731	5.47328	5.51026	A	P	A	P	P	P	P	noncoding	ENST00000438625	AC079035.2	Ensembl	856	chr12	-	62876130	62878722	GGATGCCAAAGAGAAACTCCTGAAAATTCCTCCTTGAAAATCAGGTTCAATCAAGAGAAG	intronic antisense	NM_015026	MON2	protein MON2 homolog	+	62860596	62991363
ASHG19A3A037778	124.603	111.241	82.722	103.31	88.3036	100.61	94.6229	7.05507	6.89824	6.52935	6.58097	6.41397	6.5792	6.38595	P	P	P	P	P	P	P	noncoding	AY726578		misc_RNA	2241	chr9	-	99876701	99878926	CCTGTAGCCAAGTTGCACTCCACAAGTGAATCACCAATAGTAAAAGAAAAAAGTATAATT	intergenic
ASHG19A3A012206	98.9783	102.626	64.126	76.6878	63.0309	67.8031	68.2733	6.747	6.78805	6.17024	6.13943	5.9208	5.99993	5.90362	P	P	P	P	P	P	P	noncoding	ENST00000434311	RP5-1068B5.3	Ensembl	478	chr1	-	229576030	229576767	TAACCATCTTGCTCCAGCAGCTGAAAAGGTCAGAAGTTAAACATGGTGAAGAGTCCGGTT	intergenic
ASHG19A3A041575	101.498	88.3177	80.7788	344.483	301.404	329.627	319.753	6.77925	6.57879	6.49559	8.41005	8.26903	8.36844	8.23909	P	P	P	P	P	P	P	noncoding	ENST00000417443	NCRNA00086	Ensembl	2913	chrX	+	134555867	134559682	AGACACTGACCGGAATGACATACTTTTCTGTGTGTGATTCACTGTGTACTGGTCAGCACA	intergenic
ASHG19A3A011217	80645.6	79551.3	70877.4	56337.8	59608.7	62957.6	56473.9	16.0201	16.0714	15.9503	16.0072	16.0335	16.1052	15.8941	P	P	P	P	P	P	P	noncoding	ENST00000467018	CTC-251H24.1	Ensembl	154	chr19	-	18396152	18396306	GAAATAAAATCAGGTACAACTCCAAAAGGACACTGGAGAAGAACCAAGCTGGGTCTATAA	intergenic
ASHG19A3A041577	38.6806	25.7863	27.9216	78.426	64.4213	79.2874	55.6937	5.42184	4.92643	5.02697	6.17412	5.95044	6.22519	5.5982	A	P	P	P	P	P	P	noncoding	ENST00000426910	RP11-265D19.5	Ensembl	5675	chrX	+	134566884	134572559	AACCTGCATCTGCAGAAGGCTCTGACCGCCTGTGAACATGACTGCCAAGTGCTCCTGGAA	intergenic
ASHG19A3A018430	506.596	443.549	416.038	409.471	413.096	398.141	388.07	8.94298	8.77116	8.73032	8.67079	8.73692	8.65412	8.52939	P	P	P	P	P	P	P	noncoding	ENST00000422599	KRT18P4	Ensembl	1288	chr20	+	48573281	48574569	ACAGAGAGGAGCTGGACATGTACTGATCTCAGTAGATTGAGGAGAACACTACAGAAGTCA	intergenic
ASHG19A3A037316	46.5909	36.9095	43.5043	47.9725	42.8624	37.4656	39.3352	5.68474	5.40526	5.63952	5.42767	5.3317	5.11151	5.06928	P	P	P	P	P	P	P	noncoding	ENST00000425499	RP11-112J3.15	Ensembl	696	chr9	-	35756708	35757937	AATGGCAGACAGTAATCCAAGACGCAGACAACCTTGCTTTTAAGCCATCCGTTACACAGA	intergenic
ASHG19A3A039081	90.3939	77.3883	72.1499	111.916	72.1814	46.1961	61.9393	6.61332	6.39843	6.33413	6.69678	6.11371	5.4278	5.75623	P	P	P	P	P	P	P	noncoding	ENST00000435485	RP11-308N19.1	Ensembl	1686	chr9	+	109040672	109367076	TGTGTCTTAAGCTGGGTCATTGAAGTGGAATGTTTTCACAAGACCTCCTCCACTTGCTAC	intergenic
ASHG19A3A032563	77607.2	78152.8	71851.6	61437.7	63269.4	58793.5	62937.7	15.9661	16.046	15.9689	16.1177	16.123	15.9999	16.0586	P	P	P	P	P	P	P	noncoding	ENST00000396414	AC004129.9	Ensembl	783	chr7	-	25251785	25252582	GTGGATACCATCCAGCTGGTTGTCTTCCTGCCTGCCTTATGTCGTAAAATGGGGGTCTCT	intergenic
ASHG19A3A033939	167.996	152.217	146.233	392.445	139.691	109.573	129.781	7.46263	7.32143	7.30876	8.60526	7.1075	6.70657	6.86371	P	P	P	P	P	P	P	noncoding	ENST00000348899	PMS2CL	Ensembl	569	chr7	+	6769411	6771575	TCAGGTCACCGCTTGCTCTAGTTCCCAGGCTTTGGCCCCCAGTGGACGAGAATCGCTGAG	intergenic
ASHG19A3A013030	186.133	197.556	142.9	222.263	110.332	95.1273	131.429	7.60348	7.67711	7.27796	7.73422	6.74949	6.49633	6.88464	P	P	P	P	P	P	P	noncoding	ENST00000441512	AC011515.2	Ensembl	579	chr19	+	55182681	55184042	AAGAAAAAGATACATCACCTTCCCCAGAGTTCTGGCCAGAAGTTCTCCCAAGATGACTTC	intergenic
ASHG19A3A009690	4014.27	3864.94	3435.09	738.597	832.418	811.631	836.07	11.8075	11.7564	11.6506	9.57728	9.8043	9.73498	9.70534	P	P	P	P	P	P	P	noncoding	ENST00000430471	RP11-134G8.8	Ensembl	598	chr1	-	201433510	201434274	GGTTCAACTTGCTCATCTGATGTGTGAATTACATCACACAGTTGAATGAGAATTTGTTAA	intergenic
ASHG19A3A031776	198793	198689	187164	71952.9	78922.9	79415.1	77841.9	17.3514	17.4375	17.3596	16.3825	16.4397	16.4397	16.3755	P	P	P	P	P	P	P	noncoding	ENST00000403475	RP11-378G13.2	Ensembl	994	chr6	+	84102134	84103128	CTCAACGACCACTTTGTCAAGCTCATTTCCTGGTATGACAATGAATTTGGCTGCAGCAAC	intronic antisense	NM_002395	ME1	NADP-dependent malic enzyme	-	83920109	84140938
ASHG19A3A019406	151.933	148.171	125.617	254.413	234.029	244.443	240.539	7.32196	7.28489	7.09757	7.94371	7.88528	7.92392	7.80736	P	P	P	P	P	P	P	noncoding	uc002zkr.3	BC016035	UCSC_knowngene	1174	chr22	-	16124263	16193004	CATATATGCAACTATGACAGGAGGTACTAAAAGCCTTAGATAAGCATGGTGTATCTTTTT	intergenic
ASHG19A3A055160	44.165	41.8716	44.0979	29.7028	33.5437	23.2322	18.1788	5.60965	5.57173	5.65958	4.70818	4.9645	4.39076	3.87767	P	P	P	P	P	P	P	noncoding	uc002rby.2	BC035112	UCSC_knowngene	3502	chr2	-	14368998	14541082	AGGAAGCAAGAACACCTCGAGACAGGAGGCATGGCTGGGAGGCCTCAGGAAACGTATAAT	intergenic
ASHG19A3A033664	31.3005	13.3588	50.0927	49.34	33.858	23.4433	27.6882	5.12469	4.10976	5.83103	5.4758	4.9793	4.40621	4.52977	A	P	P	P	P	P	P	noncoding	ENST00000499517	AC104597.2	Ensembl	2944	chr7	-	142493794	142497628	AGAGATCCACACTGCTAAACAGTAAACTTTCATTCTTTTCTTCACTGACTCATGTTCATC	intergenic
ASHG19A3A034376	24.2148	23.0248	18.9717	34.9466	17.2792	13.7269	20.4683	4.76781	4.78163	4.49473	4.95378	3.96494	3.55517	4.06028	A	P	P	P	P	A	P	noncoding	NR_026929	DKFZp434L192	RefSeq_NR	1068	chr7	+	56563915	56564977	ACCACATCACCAGGCTCAGTTCCAGGAAGGCTGAGAAGTGCCCAGTACACTGAGGATGCA	intergenic
ASHG19A3A029404	805.774	741.967	734.671	228.473	223.884	250.536	225.788	9.55864	9.45699	9.49204	7.77804	7.81647	7.96162	7.70686	P	P	P	P	P	P	P	noncoding	ENST00000445390	RP1-290I10.4	Ensembl	636	chr6	-	10460138	10460774	ATTAAAGTCGAGGAAAGTTATGTGATGCCAACCAAAACCACTGAAGTGTTGTGGTTGCAG	intergenic
ASHG19A3A030686	304.426	288.618	250.756	450.962	479.78	507.741	475.217	8.26371	8.1805	8.02764	8.81993	8.97352	9.03402	8.83887	P	P	P	P	P	P	P	noncoding	ENST00000419134	RP1-12G14.7	Ensembl	340	chr6	-	149912890	149913799	CTCCTGCATCTCAGCCATTCTTACCTGGGCAAAGGTTTTATATCAGTGTAACCAAAACAG	intergenic
ASHG19A3A014388	59.5663	49.1621	60.676	77.1744	33.5017	36.4811	32.0168	6.02782	5.7842	6.09624	6.14924	4.96208	5.07276	4.76041	P	P	P	P	P	M	P	noncoding	ENST00000419784	RP1-156L9.1	Ensembl	840	chr2	-	132741509	132751734	AGATGAGGAGAAATTCGAAGTATTCCAACGTCTGCCCTCATGAATAGATCAAGCCTTGGG	intergenic
ASHG19A3A021731	1683.5	1456.42	1629.15	389.73	371.328	386.349	395.166	10.5629	10.3714	10.5867	8.59309	8.57526	8.60653	8.55516	P	P	P	P	P	M	M	noncoding	ENST00000460914	RP11-505J9.1	Ensembl	211	chr3	-	148413780	148413991	AGAAGGCAGAGAAACTGAAGCAGTTCTGGCACCCTGGTTTGTTAGAGAAGGAGATGAAAT	intergenic
ASHG19A3A009370	555.491	549.643	532.553	583.124	334.272	268.322	223.226	9.06378	9.046	9.04901	9.21749	8.4248	8.06429	7.68851	P	P	P	P	P	P	M	noncoding	AF086167		misc_RNA	550	chr1	-	200295521	200296221	ATGATTACTGGACTTCTGTGCTGCCCAGTTCCACCACACCCCTACTGTGCCTTTCCTTTT	intergenic
ASHG19A3A028176	115.059	115.408	105.887	90.534	90.2915	89.0014	84.929	6.94673	6.94501	6.86604	6.39345	6.44684	6.39488	6.22986	P	P	P	P	P	P	P	noncoding	AK131511		misc_RNA	3913	chr5	+	43715449	43719361	CCCAATTCTTCCCATATACGCTGACACACAGAATGTACTCAATATTTGTTAAATGAATGA	intergenic
ASHG19A3A009102	69201.9	66761.3	61178.2	74388.9	76940.9	77463.4	81065.3	15.8112	15.7905	15.721	16.4156	16.413	16.4144	16.4236	P	P	P	P	P	P	P	noncoding	ENST00000479856	RP11-713H12.1	Ensembl	347	chr17	+	8464547	8464894	ACATTACCGTGTGAGTTGTGCAATTCACAGCAAAGTAGTCAGGAATCGATCTCGTGAAGC	intronic antisense	NM_005964	MYH10	myosin-10	-	8377529	8534036
ASHG19A3A016272	35.6326	32.9783	35.7274	17.405	19.4952	20.9611	17.2712	5.31293	5.25622	5.3644	3.88718	4.15701	4.23319	3.79505	P	P	P	P	P	P	P	noncoding	ENST00000413602	AC013275.2	Ensembl	2019	chr2	+	120234023	120244922	TAAGCTGCCATATTTTGGAAAAATGAGCCAAGATCAGTGGTGCCAAGGGAAGAATGGGCA	intronic antisense	NM_002980	SCTR	secretin receptor precursor	-	120197418	120282028
ASHG19A3A018316	33446	32830	30722.2	13487.4	13307	13649.8	13816.2	14.7819	14.7787	14.7418	13.8851	13.8966	13.897	13.8354	P	P	P	P	P	P	P	noncoding	CR604483		RNAdb	1073	chr20	+	39752035	39753108	GAAACCATTTTCCCATCATCCTTTGTTCTGAGCATTCGCTGTACCCTTTAAGATATCCAT	exon sense-overlapping	NM_003286	TOP1	DNA topoisomerase 1	+	39657461	39753126
ASHG19A3A040778	151.997	135.741	142.294	150.591	79.8434	96.3156	185.111	7.32293	7.16743	7.27256	7.14215	6.26545	6.51462	7.40405	P	P	P	P	P	P	P	noncoding	ENST00000450430	GS1-466O4.3	Ensembl	606	chrX	+	26218158	26218764	AAAGTCAATGATACCATCCCAAGGTGTCTTCCTATCCCTTTATACAAGGCACTGAGACAT	intergenic
ASHG19A3L0000958	27.4958	17.4986	13.6385	31.4575	22.061	19.8168	28.7504	4.94565	4.44117	4.03572	4.79864	4.337	4.14609	4.59512	A	P	A	P	M	M	M	noncoding	chr18:38893677-38905677+	lincRNA-PIK3C3-1	lincRNA	12001	chr18	+	38893677	38905677	TATTACTTTCTCCTAAAGAGCCAACACTACCTTTTTGCATATATGGCATTCACTTCTCAT	intergenic
ASHG19A3A046604	118.225	103.037	119.348	498.944	468.16	466.824	504.918	6.98578	6.79288	7.02901	8.98728	8.93989	8.89734	8.93784	P	P	P	P	P	P	P	noncoding	AK024558		misc_RNA	1243	chr1	-	61691244	61692464	TTCCTTTTGGTGATACAAAATAAAATTTCCTGCTATAGTTGCTCCATCTCTTTCACATGC	intronic antisense	NM_001145512	NFIA	nuclear factor 1 A-type isoform 4	+	61547533	61928460
ASHG19A3A046604	118.225	103.037	119.348	498.944	468.16	466.824	504.918	6.98578	6.79288	7.02901	8.98728	8.93989	8.89734	8.93784	P	P	P	P	P	P	P	noncoding	AK024558		misc_RNA	1243	chr1	-	61691244	61692464	TTCCTTTTGGTGATACAAAATAAAATTTCCTGCTATAGTTGCTCCATCTCTTTCACATGC	intronic antisense	NM_001134673	NFIA	nuclear factor 1 A-type isoform 1	+	61547979	61928460
ASHG19A3A046604	118.225	103.037	119.348	498.944	468.16	466.824	504.918	6.98578	6.79288	7.02901	8.98728	8.93989	8.89734	8.93784	P	P	P	P	P	P	P	noncoding	AK024558		misc_RNA	1243	chr1	-	61691244	61692464	TTCCTTTTGGTGATACAAAATAAAATTTCCTGCTATAGTTGCTCCATCTCTTTCACATGC	intronic antisense	NM_001145511	NFIA	nuclear factor 1 A-type isoform 3	+	61542945	61928460
ASHG19A3A046604	118.225	103.037	119.348	498.944	468.16	466.824	504.918	6.98578	6.79288	7.02901	8.98728	8.93989	8.89734	8.93784	P	P	P	P	P	P	P	noncoding	AK024558		misc_RNA	1243	chr1	-	61691244	61692464	TTCCTTTTGGTGATACAAAATAAAATTTCCTGCTATAGTTGCTCCATCTCTTTCACATGC	intronic antisense	NM_005595	NFIA	nuclear factor 1 A-type isoform 2	+	61547979	61928460
ASHG19A3A038930	45.3402	41.7272	50.3323	182.944	126.359	115.163	235.705	5.64788	5.56637	5.83747	7.44451	6.95643	6.77961	7.77574	P	P	P	P	P	P	P	noncoding	ENST00000432119	RP11-100G15.3	Ensembl	779	chr9	+	94871294	94872377	TATTGACACTTTGTAGATGTCGTATGACTATTCCCATGTGTCTCTATCTACTGGTGAGGG	intronic antisense	NM_178324	SPTLC1	serine palmitoyltransferase 1 isoform b	-	94841345	94877690
ASHG19A3A038930	45.3402	41.7272	50.3323	182.944	126.359	115.163	235.705	5.64788	5.56637	5.83747	7.44451	6.95643	6.77961	7.77574	P	P	P	P	P	P	P	noncoding	ENST00000432119	RP11-100G15.3	Ensembl	779	chr9	+	94871294	94872377	TATTGACACTTTGTAGATGTCGTATGACTATTCCCATGTGTCTCTATCTACTGGTGAGGG	intronic antisense	NM_006415	SPTLC1	serine palmitoyltransferase 1 isoform a	-	94793426	94877690
ASHG19A3A020576	1429	1293.79	1438.86	2149.17	2234.06	2031.98	2150.46	10.345	10.2148	10.4079	11.1752	11.2612	11.0929	11.1115	P	M	P	P	P	P	P	noncoding	uc003bhg.1	AK091355	UCSC_knowngene	2233	chr22	+	46646309	46648542	TCCCGGATAGCTGAGGGGCGCGAGGGCGCCTCCAGTCTCCCACCTGCCCTCCCGCGCCGC	bidirectional	NM_207327	C22orf40	hypothetical protein LOC150383	-	46639909	46646193
ASHG19A3A023852	439.237	368.177	434.391	382.973	605.18	481.665	647.876	8.76619	8.5209	8.78351	8.56526	9.32842	8.95052	9.31716	P	P	P	P	P	P	P	noncoding	AK123130		misc_RNA	3345	chr4	-	2264891	2268236	TTTTGCATTTTTTGTTCAGTTTCATTGCCAGCAGCAGCCCCTGTGTCCCACTGAGTACTT	intergenic
ASHG19A3A030189	34.7615	26.2894	26.5298	33.638	38.421	41.2507	45.4092	5.27766	4.9535	4.95794	4.89404	5.17138	5.25348	5.28901	A	P	P	P	P	P	P	noncoding	ENST00000415381	RP11-301M17.1	Ensembl	517	chr1	+	147718439	147718956	TGTGACCAGCGCGACTCACCGCTCTAATCGCTCCGATTTTCCAAGGCCTTGCTCAGTAGT	intergenic
ASHG19A3A033773	89.9531	78.9395	81.1371	85.4716	87.0085	85.0222	87.0715	6.60797	6.4264	6.50225	6.30412	6.39152	6.32593	6.26511	P	P	P	P	P	P	P	noncoding	AK127717		misc_RNA	2548	chr7	-	151074956	151077504	CCCATTCAATAGAAGATTTCTGTAATGAGGAATGCTGAATATATATAAAGCCTGACACTC	natural antisense	NM_016118	NUB1	NEDD8 ultimate buster 1 isoform 2	+	151038857	151075532
ASHG19A3A036211	157.555	121.995	143.381	146.875	200.189	151.581	218.553	7.37078	7.02301	7.28249	7.10546	7.64873	7.1956	7.65722	P	P	P	P	P	P	P	noncoding	G43337		misc_RNA	150	chr8	-	144335604	144335754	TCTTCACGGGAGAGCTAGTTGTTTAAAGCAGTGGTCCCCAACCTTCTGTGGTCCCCCGTG	intronic antisense	NM_173832	ZFP41	zinc finger protein 41 homolog	+	144329108	144344875
ASHG19A3A036507	8782.19	9119.25	8747.4	2252.28	2188.62	2288.17	2281.39	12.9118	12.9768	12.9627	11.2397	11.2335	11.2722	11.2	P	P	P	P	P	P	P	noncoding	ENST00000508840	CTD-2345M20.1	Ensembl	1898	chr8	+	30094897	30098513	TCTTTCCTTGGTATTGAAACTGATGACGGAGTCACGACTGTCCTCATTAAGCACAATACT	intergenic
ASHG19A3A049694	27.4346	13.1048	17.8522	26.6729	37.6349	29.1111	40.9394	4.94299	4.08808	4.40665	4.54706	5.13994	4.73353	5.13634	A	P	P	P	P	P	P	noncoding	ENST00000450187	RP11-25J23.3	Ensembl	348	chr13	-	80140880	80144983	CTAGCAAATAGGTGTAAGTAGTCCCAGACTTTTTCTATGCATCTCAACTGCATTCTGCGG	intergenic
ASHG19A3A042918	67.8157	50.3918	71.8168	47.5944	109.677	43.7966	124.238	6.215	5.81926	6.327	5.41683	6.74048	5.34562	6.80167	P	P	P	P	P	P	P	noncoding	ENST00000435209	RP11-399N22.3	Ensembl	294	chr10	-	72553985	72554279	TTCACAGCAAAGTAGTCAGAAATCAATCTCATGAAGGCTTCAAGGACCCAACACTCCCAC	intergenic
ASHG19A3A047274	355.089	326.26	293.989	846.651	815.99	885.326	910.65	8.4749	8.35129	8.25494	9.78954	9.77497	9.8597	9.84147	P	P	P	P	P	P	P	noncoding	NR_024420	LOC389634	RefSeq_NR	682	chr12	-	8509561	8543348	CTGGAAAGTGGTGGTAGTTCCAGATTTATGTGGATGTTACTTTGTTTTTCCCTATAAAAT	intergenic
ASHG19A3A033621	38.1927	34.8735	48.3413	37.8805	40.3837	24.2025	50.1403	5.4033	5.32926	5.78544	5.07355	5.24391	4.45607	5.43806	P	P	P	P	P	P	P	noncoding	uc003vvq.1	AK131347	UCSC_knowngene	2736	chr7	-	140100135	140104233	ACTTCCGGTGTCTTGGTCTTATCACTGTAACTTGAGCTGAGACTTTACTTCCATGTCTCC	natural antisense	NM_001008749	RAB19	ras-related protein Rab-19	+	140103842	140126050
ASHG19A3A044516	112.274	86.6982	89.4853	483.981	748.322	361.249	836.087	6.91171	6.55178	6.63617	8.93469	9.64495	8.50236	9.70544	P	P	P	P	P	P	P	noncoding	ENST00000396885	RP11-506B15.4	Ensembl	699	chr1	-	43913446	43914315	TCGATGTCCCCAATGGATTTGGCATGGACTGCTTCTAGGAGTTCCTCCAGCTCTGCCAGG	natural antisense	NM_015284	KIAA0467	protein SZT2	+	43888796	43918304
ASHG19A3A046173	334.251	329.763	310.369	264.653	298.496	281.493	287.712	8.39702	8.36628	8.33052	8.00646	8.25467	8.13644	8.08281	P	P	P	P	P	P	P	noncoding	ENST00000333752	AC116533.3	Ensembl	264	chr11	+	17073577	17073845	AACAACAGATGTCTCAATATTCCTCGTCCTAGAACTCTCAGAGGATCCAGAACTACAGCC	intergenic
ASHG19A3A011200	34.2811	28.0303	34.6238	27.5718	50.0499	27.8856	55.7051	5.25757	5.03899	5.31782	4.59809	5.56781	4.66729	5.5985	P	P	P	P	P	P	P	noncoding	uc002ngr.2	BC039402	UCSC_knowngene	624	chr19	-	17555634	17559116	TCTATTTAGCAGGTGTGTGCTGGAATAGAACGTGGGGCATGGGACCCTGGGCTGGGTAGA	exon sense-overlapping	NM_001190844	TMEM221	transmembrane protein 221	-	17546317	17559376
ASHG19A3A025276	49628.3	47028.3	45902.4	21367.2	25010.2	26085.8	26569.5	15.3386	15.2864	15.3097	14.5714	14.799	14.8323	14.7923	P	P	P	P	P	P	P	noncoding	ENST00000468675	RP11-1396O13.2	Ensembl	780	chr4	+	9564790	9565570	AATCATGACCTGAGAGGTGCGGCAAATGACTTGAAAGAATTGGTCAATAAAATGATTCCA	intergenic
ASHG19A3A000137	10085	9970.06	9263.49	8534.08	8495.8	8404.08	8328.78	13.1016	13.1026	13.039	13.2053	13.2338	13.1704	13.0922	P	P	P	P	P	P	P	noncoding	ENST00000419923	POLR2J4	Ensembl	6167	chr7	-	43980493	44056090	AGACCACACACTGGGAAACATCATTAAATCacgtgcctgcttccccttcgccttctgccg	natural antisense	NM_015983	UBE2D4	ubiquitin-conjugating enzyme E2 D4	+	43966034	43995735
ASHG19A3A000137	10085	9970.06	9263.49	8534.08	8495.8	8404.08	8328.78	13.1016	13.1026	13.039	13.2053	13.2338	13.1704	13.0922	P	P	P	P	P	P	P	noncoding	ENST00000419923	POLR2J4	Ensembl	6167	chr7	-	43980493	44056090	AGACCACACACTGGGAAACATCATTAAATCacgtgcctgcttccccttcgccttctgccg	intronic antisense	NM_175064	SPDYE1	putative WBSCR19-like protein 6	+	44040488	44049723
ASHG19A3A038687	72.6701	67.8551	66.7135	81.9828	98.101	84.1066	111.808	6.31607	6.21953	6.225	6.24345	6.57063	6.30965	6.64112	P	P	P	P	P	M	P	noncoding	ENST00000427875	RP11-459O16.7	Ensembl	228	chr9	+	66396885	66397113	AAAGTTGTAGGTCTGCCAAGTGGTGCTGGATTCAACACATCTTCTCACCTTCTCTTTCCA	intergenic
ASHG19A3A049789	132.11	117.205	130.197	92.2819	152.193	114.646	162.387	7.13275	6.96677	7.14861	6.41944	7.23477	6.77251	7.20747	P	P	P	P	P	P	P	noncoding	AK125572		RNAdb	3355	chr13	-	100504863	100609401	ATGACAATGTGTCTGGCAAGTTCTTCCCCTGTGTGACTTGCTCATATTTCAAATAGTGGA	intronic antisense	NM_206808	CLYBL	citrate lyase subunit beta-like protein,	+	100258918	100549388
ASHG19A3A039461	278.387	270.86	303.28	884.309	1142.04	1002.47	1136.1	8.13199	8.09786	8.29828	9.85741	10.2789	10.0591	10.1757	P	P	P	P	P	P	M	noncoding	uc004ciz.1	AK128864	UCSC_knowngene	2702	chr9	+	139640612	139644363	ATTAAATATAAAAAGTCCCTGAAAGCCTTTTGAAAAAGGCTCCCACCTCCTCCTGGCCCA	natural antisense	NM_198946	LCN6	epididymal-specific lipocalin-6 precursor	-	139638468	139642980
CUST_469_PI426073487	1779.59	1947.26	1692.34	1059.68	1099.69	1089.51	1204.73	10.6487	10.7897	10.6409	10.1311	10.2115	10.1914	10.2614	P	P	P	P	P	P	M	noncoding	uc.471+	uc.471	UCR	239	chrX	+	41208370	41208609	GCCCTTGTACATTTTGCCCATAACTTTTTACAAAGTACTTCTTTTATTGCACATTCAGAG	exon sense-overlapping	NM_001193416	DDX3X	ATP-dependent RNA helicase DDX3X isoform 2	+	41192650	41209524
CUST_469_PI426073487	1779.59	1947.26	1692.34	1059.68	1099.69	1089.51	1204.73	10.6487	10.7897	10.6409	10.1311	10.2115	10.1914	10.2614	P	P	P	P	P	P	M	noncoding	uc.471+	uc.471	UCR	239	chrX	+	41208370	41208609	GCCCTTGTACATTTTGCCCATAACTTTTTACAAAGTACTTCTTTTATTGCACATTCAGAG	exon sense-overlapping	NM_001193417	DDX3X	ATP-dependent RNA helicase DDX3X isoform 3	+	41192650	41209524
CUST_469_PI426073487	1779.59	1947.26	1692.34	1059.68	1099.69	1089.51	1204.73	10.6487	10.7897	10.6409	10.1311	10.2115	10.1914	10.2614	P	P	P	P	P	P	M	noncoding	uc.471+	uc.471	UCR	239	chrX	+	41208370	41208609	GCCCTTGTACATTTTGCCCATAACTTTTTACAAAGTACTTCTTTTATTGCACATTCAGAG	exon sense-overlapping	NM_001356	DDX3X	ATP-dependent RNA helicase DDX3X isoform 1	+	41192650	41209524
ASHG19A3A041119	169546	182086	152230	113779	145234	130173	135213	17.1153	17.3076	17.0729	17.0153	17.2924	17.0994	17.1692	P	P	P	P	P	P	P	noncoding	ENST00000422565	RP13-470G3.1	Ensembl	375	chrX	+	67819940	67820315	GTTACCTATGTACCTGTTACCACTTTCGAAAATCTACAGACAGTCAATGTGGATGAGAAC	intergenic
ASHG19A3L0002211	77.4099	84.1216	66.2381	93.8998	94.483	99.0963	105.275	6.40665	6.51089	6.21348	6.44417	6.51993	6.55744	6.5492	P	P	P	P	P	P	P	noncoding	AL832443	lincRNA-BNC2-2	lincRNA	2382	chr9	+	15874538	16061659	GGAAAGAATGCATTCACAGAAAGCCAAGGAATGATAACACTAATGCTAATACAATACTAC	exon sense-overlapping	NM_173550	C9orf93	hypothetical protein LOC203238	+	15553096	15971897
ASHG19A3A020179	9578.25	10482.5	9521.89	21721.7	24060.2	23972	24101.2	13.0314	13.1731	13.0833	14.5879	14.7464	14.7104	14.6552	P	P	P	P	P	P	P	noncoding	HIT000326532		H-invDB	282	chr22	+	22735460	22735741	ACCATCTCTTGTTCTGGAAGCAGCTCCAACATCGGAAGTAATACTGTAAACTGGTACCAG	intergenic
CUST_396_PI426073487	27.5272	27.9618	27.8427	44.516	39.5243	42.1328	49.8197	4.94768	5.03634	5.02368	5.31999	5.21269	5.28804	5.42713	A	P	P	P	P	P	P	noncoding	uc.398+	uc.398	UCR	322	chr16	+	49890890	49891212	ATAATAAAGCCAGGCTTGGCTGGAAATGTAGCCGGGTCCCAGCAGGAGGATGTGAGGAGC	intergenic
ASHG19A3A033656	107.919	122.641	108.084	103.298	137.409	161.393	156.89	6.8602	7.03029	6.89558	6.58054	7.07943	7.29396	7.15718	P	P	P	P	P	P	P	noncoding	CR610450		misc_RNA	863	chr7	-	142159449	142160308	ACGCTGGTGACTAACTTTTCTTTTAATACTGTGTCTGAAGTCTCTCTCACCCAGAGGGTC	intergenic
ASHG19A3A018714	34754.2	39703.8	33540.7	24685.1	26837.7	26956.5	26067.6	14.8331	15.0558	14.8741	14.7701	14.8898	14.8883	14.7681	P	P	P	P	P	P	P	noncoding	ENST00000400028	GPXP2	Ensembl	600	chr21	-	28515662	28516271	TTCCAGACCATTGACATCGAGCCTGACATCGAAGCCCTGCTGTCTCAAGGGCCCAGATGT	intergenic
ASHG19A3A030626	39489	42527.2	39844.1	21502.5	25648.7	25170	26115.5	15.0232	15.1539	15.1105	14.5796	14.8346	14.7819	14.7712	P	P	P	P	P	P	P	noncoding	ENST00000407538	RP11-471B18.1	Ensembl	456	chr6	-	141243592	141244048	CAAAATCTACCCCAGTACAAGATCCCAGACTGGTCCTTAAACAGACAGAAGTATATAAAG	intergenic
ASHG19A3A046121	40.16	47.9048	42.8803	38.6471	46.3006	49.9756	45.1927	5.47202	5.75362	5.62078	5.10565	5.45189	5.54192	5.28298	P	P	P	P	P	P	P	noncoding	NR_027713	FLJ46111	RefSeq_NR	1828	chr11	+	9115909	9117737	TCAAAACGAAGCTCATGACCTAGAAGAAGCTTCTCTGCTTTCTCGAATCTCTGCCTGGTT	intergenic
ASHG19A3A030186	34.4951	26.5093	43.9515	11.855	19.1949	20.4705	22.4897	5.26574	4.96536	5.65351	3.27256	4.13482	4.19764	4.21173	A	P	P	P	P	P	A	noncoding	ENST00000403828	RP11-486E2.1	Ensembl	1349	chr6	-	81265557	81266906	TCTGAAACACCACATAATGACCCCATGTTAACTTGGTTGCTCAACTACACAAGATTGTGC	intergenic
ASHG19A3A047909	47762.4	56889.8	48021.4	40386.6	45201	45129.7	47056	15.2804	15.5587	15.3804	15.5104	15.6546	15.652	15.6355	P	P	P	P	P	P	P	noncoding	ENST00000478358	RP11-490G8.1	Ensembl	465	chr12	-	95861172	95861637	TGAAAATGGCACAGAAATGGTATCAAGAAACCCCGATCACAAAGATACGAATCTCTTAAG	intergenic
ASHG19A3L0000845	25.7524	24.4214	24.3529	17.2187	28.7786	27.6806	26.0116	4.85833	4.85744	4.8327	3.86836	4.74156	4.65623	4.43775	A	P	P	P	P	P	P	noncoding	BF850330	lincRNA-MESDC2	lincRNA	177	chr15	+	81260381	81260482	ATAAATTTCCATGTACCAGCAAGCAGCATGGTCATATTGCAGTCTCCTGCTAGACCGCTT	intergenic
ASHG19A3A024271	110.92	99.0017	82.2945	112.152	77.8084	99.8013	78.3979	6.89539	6.73993	6.52196	6.69888	6.22894	6.56838	6.10973	P	P	P	P	P	P	P	noncoding	ENST00000510547	RP11-1267H10.3	Ensembl	851	chr4	-	69492564	69494617	AATTTCTTCACCCACCCTTACCAAATGTCGATTTTGTGGGGGAACTCCACTGTAAACCAG	intergenic
ASHG19A3A015669	39.8995	26.5169	23.6335	73.4878	53.8103	41.3537	64.7026	5.46307	4.9665	4.78847	6.07373	5.67579	5.25793	5.82252	A	P	P	P	P	P	P	noncoding	ENST00000366287	AC012358.8	Ensembl	771	chr2	+	55535966	55541797	AAGAACTATCTTGACTGTCTTGATGAGGGAGCTGAAGAAATCCTTCACTGGAGTCTGAGC	natural antisense	NM_018084	CCDC88A	girdin isoform 2	-	55514977	55647057
ASHG19A3A015669	39.8995	26.5169	23.6335	73.4878	53.8103	41.3537	64.7026	5.46307	4.9665	4.78847	6.07373	5.67579	5.25793	5.82252	A	P	P	P	P	P	P	noncoding	ENST00000366287	AC012358.8	Ensembl	771	chr2	+	55535966	55541797	AAGAACTATCTTGACTGTCTTGATGAGGGAGCTGAAGAAATCCTTCACTGGAGTCTGAGC	natural antisense	NM_001135597	CCDC88A	girdin isoform 1	-	55514977	55647057
ASHG19A3A011796	464.82	455.66	283.825	183.66	184.282	180.08	179.006	8.83642	8.80687	8.20661	7.45016	7.52181	7.45765	7.35594	P	P	P	P	P	P	P	noncoding	ENST00000434269	ZNF702P	Ensembl	1966	chr19	-	53472162	53474128	CACTCCTTGCAGGACATCAGGAAATTCATTTTTGAGGTAATAATTTCAAATGCAATGAGT	intergenic
ASHG19A3A043876	113.155	109.742	92.6513	175.715	41.3238	202.641	70.0374	6.9235	6.87826	6.67971	7.37886	5.28113	7.63168	5.94062	P	P	P	P	P	P	P	noncoding	ENST00000436165	OR6D1P	Ensembl	939	chr10	+	45753632	45754571	ATTGTCCTCTCTCTGGTGTATGGCAGCTGTGTCTTCATATATGTGAAGCCGAAGCAAATG	intergenic
ASHG19A3A023034	137.811	137.507	112.094	471.448	362.579	433.199	397.816	7.1918	7.18612	6.94511	8.89469	8.53739	8.78211	8.56695	P	P	P	P	P	P	P	noncoding	ENST00000442226	RP3-340N1.5	Ensembl	510	chr1	-	20510734	20512979	CTTCATCACCCACCCAAAAAAGATTAAAGTGGATTCTTCATCAGCTATTTTAAAATCACC	intronic antisense	NM_152376	UBXN10	UBX domain-containing protein 10	+	20512577	20519942
ASHG19A3A013120	137.465	118.497	129.003	126.502	52.6958	90.0418	50.8448	7.18802	6.98052	7.13674	6.88336	5.64158	6.41414	5.45781	P	P	P	P	P	P	P	noncoding	ENST00000478259	CTC-258N23.1	Ensembl	806	chr19	+	57576701	57577507	AATCCCTGGCTTGCATTGCCAAAGCTGGAAAAGGCAAAGACTAAAGAACTTGCCACCAAA	intergenic
ASHG19A3A033179	137.948	116.265	121.103	250.223	78.6827	242.033	90.0541	7.193	6.95455	7.04889	7.91928	6.24497	7.90733	6.3145	P	P	P	P	P	P	P	noncoding	G31789		misc_RNA	239	chr7	-	94721144	94721383	GTCCATGAATTAAAAAACCATGCTTTTCTCTCCTTGCCACACAGCTTTAGTTTGAAAAAA	intronic antisense	NM_001166163	PPP1R9A	neurabin-1 isoform 5	+	94539209	94925727
ASHG19A3A033179	137.948	116.265	121.103	250.223	78.6827	242.033	90.0541	7.193	6.95455	7.04889	7.91928	6.24497	7.90733	6.3145	P	P	P	P	P	P	P	noncoding	G31789		misc_RNA	239	chr7	-	94721144	94721383	GTCCATGAATTAAAAAACCATGCTTTTCTCTCCTTGCCACACAGCTTTAGTTTGAAAAAA	intronic antisense	NM_001166161	PPP1R9A	neurabin-1 isoform 2	+	94539209	94925727
ASHG19A3A033179	137.948	116.265	121.103	250.223	78.6827	242.033	90.0541	7.193	6.95455	7.04889	7.91928	6.24497	7.90733	6.3145	P	P	P	P	P	P	P	noncoding	G31789		misc_RNA	239	chr7	-	94721144	94721383	GTCCATGAATTAAAAAACCATGCTTTTCTCTCCTTGCCACACAGCTTTAGTTTGAAAAAA	intronic antisense	NM_017650	PPP1R9A	neurabin-1 isoform 4	+	94536948	94925727
ASHG19A3A033179	137.948	116.265	121.103	250.223	78.6827	242.033	90.0541	7.193	6.95455	7.04889	7.91928	6.24497	7.90733	6.3145	P	P	P	P	P	P	P	noncoding	G31789		misc_RNA	239	chr7	-	94721144	94721383	GTCCATGAATTAAAAAACCATGCTTTTCTCTCCTTGCCACACAGCTTTAGTTTGAAAAAA	intronic antisense	NM_001166160	PPP1R9A	neurabin-1 isoform 1	+	94536948	94925727
ASHG19A3A033179	137.948	116.265	121.103	250.223	78.6827	242.033	90.0541	7.193	6.95455	7.04889	7.91928	6.24497	7.90733	6.3145	P	P	P	P	P	P	P	noncoding	G31789		misc_RNA	239	chr7	-	94721144	94721383	GTCCATGAATTAAAAAACCATGCTTTTCTCTCCTTGCCACACAGCTTTAGTTTGAAAAAA	intronic antisense	NM_001166162	PPP1R9A	neurabin-1 isoform 3	+	94539209	94925727
ASHG19A3A015966	50.1905	48.8067	49.9458	153.235	50.9476	37.8074	48.9965	5.78742	5.77427	5.82808	7.16743	5.59014	5.12469	5.40249	P	P	P	P	P	P	P	noncoding	ENST00000443031	AC116050.1	Ensembl	1804	chr2	+	91777535	91809447	TTATCAGCCACTGAAGGAGTTTTCCCTGTCACCCATTCAGTGCATACTTTGTTGCAGGTA	intergenic
ASHG19A3A009581	13.4704	7.26635	10.1622	35.7052	18.4803	14.6797	23.0853	3.92745	3.43295	3.63841	4.98452	4.07381	3.67028	4.25511	A	A	A	P	P	P	P	noncoding	AK096357		misc_RNA	3483	chr17	+	42767225	42770708	CTGAATCAAGGTTCTCCAGACCCTAAATTTTAAGAATATCCTCAATGGCTATTTTACTAC	bidirectional	NM_144609	CCDC43	coiled-coil domain-containing protein 43 isoform	-	42754804	42767165
ASHG19A3A009581	13.4704	7.26635	10.1622	35.7052	18.4803	14.6797	23.0853	3.92745	3.43295	3.63841	4.98452	4.07381	3.67028	4.25511	A	A	A	P	P	P	P	noncoding	AK096357		misc_RNA	3483	chr17	+	42767225	42770708	CTGAATCAAGGTTCTCCAGACCCTAAATTTTAAGAATATCCTCAATGGCTATTTTACTAC	bidirectional	NM_001099225	CCDC43	coiled-coil domain-containing protein 43 isoform	-	42754804	42767165
ASHG19A3A014170	121.74	104.64	108.66	56.8185	61.6597	46.4438	57.0593	7.02455	6.81264	6.90304	5.68237	5.88493	5.43409	5.63674	P	P	P	P	P	P	P	noncoding	uc002tee.3	FLJ38668	UCSC_knowngene	547	chr2	-	109124004	109150675	AGTCAAGAAGAACATGCCCCAAGTTATTCGTCAGTGAGGCGGAAATTGTGGTGTACTTGT	bidirectional	NM_001193483	LIMS1	LIM and senescent cell antigen-like-containing	+	109150856	109303702
ASHG19A3A014170	121.74	104.64	108.66	56.8185	61.6597	46.4438	57.0593	7.02455	6.81264	6.90304	5.68237	5.88493	5.43409	5.63674	P	P	P	P	P	P	P	noncoding	uc002tee.3	FLJ38668	UCSC_knowngene	547	chr2	-	109124004	109150675	AGTCAAGAAGAACATGCCCCAAGTTATTCGTCAGTGAGGCGGAAATTGTGGTGTACTTGT	natural antisense	NM_181453	GCC2	GRIP and coiled-coil domain-containing protein	+	109065576	109125854
ASHG19A3A024005	35.1908	30.4089	33.8664	34.7573	23.0275	12.0543	16.454	5.29594	5.14469	5.2876	4.94654	4.40105	3.34868	3.71659	P	P	P	P	P	A	P	noncoding	ENST00000504991	RP11-339D20.1	Ensembl	413	chr4	-	20039182	20039595	TTGAACTATGGGAAGATTTGACTGTCTTGGATGTCAGCTTATTATTCCATAGGTGGGGGG	intergenic
ASHG19A3A053582	253.476	255.122	226.6	146.579	138.327	127.554	132.346	8.01349	8.01619	7.88982	7.10196	7.09119	6.93641	6.89707	P	P	P	P	P	P	P	noncoding	AK097966		misc_RNA	1908	chr16	-	22424506	22427098	TCAGGTAATTACCCCCGCTCAAAACTAAAAACTGTCCAGTCGCCATTTTTTCTGTTTTTT	intergenic
ASHG19A3A041433	117516	111665	109236	75796.9	92524.5	91610.2	80521.5	16.5558	16.5294	16.5648	16.4529	16.6734	16.642	16.4166	P	P	P	P	P	P	P	noncoding	ENST00000434365	RP1-241P17.3	Ensembl	1310	chrX	+	114937130	114938440	AAGAATGCCTTCGCCAGTGTCATCCTCTTTGGAACCAACAATATCAGCTCCATTTCTGGA	intergenic
ASHG19A3A052798	1490.61	1424	1346.53	1334.7	597.526	671.486	562.162	10.4028	10.3425	10.3208	10.4811	9.30762	9.45181	9.11033	P	P	P	P	P	P	P	noncoding	uc001znn.1	LOC729082	UCSC_knowngene	1379	chr15	+	41576200	41601901	CTGCATTTCCCCTCCATTCTTGAAGCCAATCTTTTTCAAGAAATGACTAAGCAGCACCTG	natural antisense	NM_007280	OIP5	protein Mis18-beta	-	41601465	41624819
ASHG19A3A017418	36.3681	18.3829	36.147	45.2492	20.2146	11.75	8.79798	5.3383	4.50232	5.38285	5.3448	4.21195	3.30678	2.76077	A	P	P	A	P	A	P	noncoding	NR_026883	HSPC072	RefSeq_NR	1574	chr20	-	18768614	18775228	AAGAGAGAAATCAACAGTAAACGCTGCACATCCTCTGTCTGGTAAATGTGCATCACTGAT	intergenic
ASHG19A3A039757	75.8226	72.0959	67.2852	59.9598	93.9325	86.8093	87.1222	6.37711	6.30187	6.23724	5.76535	6.51173	6.35764	6.2656	P	P	P	P	P	P	P	noncoding	ENST00000397351	RP6-186E3.1	Ensembl	1545	chrX	-	40218435	40219982	ATGATGTACTCAGGAGAGCTCAAGTTTGAGAAGGGGACCGTGTCGGCCCAGATCGAGGGT	intergenic
[truncated: 29,391 more rows]

## Sheet: Box Plot - LncRNAs
Box Plot
[truncated: 1 more rows]

## Sheet: Scatter Plot - LncRNAs
Scatter Plot
[truncated: 1 more rows]

## Sheet: Hierarchical Clustering-LncRNAs
Heat Map and Hierarchical Clustering
[truncated: 1 more rows]
