# Supplementary material for: Long Noncoding RNA Expression Signatures of Metastatic Nasopharyngeal Carcinoma and Their Prognostic Value
Source: Biomed Res Int. 2015 Sep 13;2015:618924. doi: 10.1155/2015/618924 (PMC4584063; doi:10.1155/2015/618924)
Supplement: Supplementary file 1 — Table S01. The clinical information corresponding to the seven NPC patient samples used for microarray analysis. Table S02. Four different lncRNA members (LOC84740, ENST00000498296, AL359062, and ENST00000438550) were selected to verify their expression levels via QPCR. This table supply the primer sequences used for Real-time PCR of the four lncRNAs. Table S03. lncRNA Expression Profiling Data. A total of 33,045 lncRNA probes were used in our lncRNA microarray. Up to 30,610 lncRNAs were detected in all seven samples. Table S04. Differentially Expressed lncRNAs. A total of 8,088 lncRNAs were identified to be significantly differentially expressed(≥2-fold) between the metastatic and primary NPC tumors in the microarray. Among these, 3,778 lncRNAs were found to be consistently upregulated; 4,310 lncRNAs were downregulated. Table S05. HOX cluster profiling. In this study, we detected the transcripts in HOX loci, 477 transcribed regions were found. Among them, 257 were ncRNAs and 220 were HOX coding transcripts. Table S06. Differentially expressed IncRNAs at HOX locus. In the four randomly paired groups, the number of differentially expressed lncRNAs differed, but several lncRNAs displayed similar changes in expression. Compared with the NPC primary tumors, 70 lncRNAs were found to be differentially expressed in metastatic tissues; 51 coding transcripts were differentially expressed. Table S07. Rinn lincRNA expression profiles. A total of 4,199 Rinn lincRNAs were detected in this microarray analysis. Table S08. Differentially expressed Rinn lincRNAs. A total of 1,069 Rinn lincRNAs were found to be differentially expressed. Table S09. Enhancer lncRNAs profiles. A total of 1,598 enhancer lncRNAs were detected, of which 468 lncRNAs were differentially expressed. Table S10. Data for enhancer lncRNAs regulating a nearby coding gene. The differentially expressed enhancer lncRNAs and their nearby coding genes (distance < 300 kb) were presented. Table S11. Data for lincRNAs reg [file 618924.f1.zip › S04 Differentially Expressed lncRNAs.xls]

## Sheet: M vs T up
# Fold-Change cut-off: 2.0 # P-value cut-off: 0.05 # Condition pairs: M vs T # Column A: ProbeName, it represents probe name. # Column B: P, P-value, P-value calculated from paied t-test. # Column C: FC (abs), Absolute Fold Change, the absolute ratio (no log scale) of normalized intensities between two conditions. # Column D: Regulation, it depicts which group has greater or lower intensity value…
M vs T 2.0 fold up regulated LncRNAs
	P-value	Fold change and Regulation		Annotations																	Group--Raw Intensity		Group--Normalized Intensity		Raw Intensity							Normalized Intensity
ProbeName	p-value	FC (abs)	Regulation	type	seqname	GeneSymbol	source	RNAlength	chrom	strand	txStart	txEnd	probeSeq	relationship	Associated_gene_acc	Associated_gene_name	Associated_protein_name	Associated_gene_strand	Associated_gene_start	Associated_gene_end	M(raw)	T(raw)	M(normalized)	T(normalized)	[M_1](raw)	[M_luzhidong](raw)	[M_xiexianghua](raw)	[T_liangweidong2](raw)	[T_longfangjian1](raw)	[T_yufengzhen1](raw)	[T_zhangjun2](raw)	[M_1](normalized)	[M_luzhidong](normalized)	[M_xiexianghua](normalized)	[T_zhangjun2](normalized)	[T_yufengzhen1](normalized)	[T_liangweidong2](normalized)	[T_longfangjian1](normalized)
ASHG19A3A014810	0.0251239	2.13674	up	noncoding	ENST00000399556	AC010746.4	Ensembl	865	chr2	-	198244424	198245616	GGACAAGAATCCTTCAAAAAACAGGAAAAAACTCCTAAAACACCTAAAAGGACCTAGTTC	intergenic							41760	14446.7	15.0524	13.957	51369.9	47982.1	25928.1	10980.8	15532.4	15942.6	15330.9	15.3774	15.3162	14.4636	13.9996	14.1153	13.5924	14.1207
ASHG19A3A019949	0.047904	2.57795	up	noncoding	ENST00000413815	RP11-191L9.5	Ensembl	809	chr22	-	48058238	48059352	AGGTGTCAGAAGTGTGAGCCTGAAGGCCTAAGAGGTGTTGCAGCTTCTTTACCATTTTTT	intergenic							212.792	102.735	7.78719	6.42097	220.911	226.927	190.538	194.605	66.6784	84.7847	64.8719	7.83207	7.86229	7.66721	5.82683	6.32187	7.53321	6.00196
ASHG19A3A037731	0.000354794	13.2705	up	noncoding	ENST00000426188	AL691447.1	Ensembl	330	chr9	-	97109515	97109845	CTGAAATCATTGCCAAGGACTTAAAGGAGAAGAAGGAAGTTGTGAAAGACGCGGAAAATG	intergenic							351.6	29.9674	8.45996	4.72982	381.199	389.666	283.937	34.4937	29.9081	29.6414	25.8262	8.57748	8.59483	8.20758	4.4279	4.76119	4.93388	4.7963
ASHG19A3A054727	0.00123716	2.63772	up	noncoding	AK124821		misc_RNA	1764	chr16	+	67981589	67983353	CACGCAGATTTGCCTGGCTGATTCCAGAATGTTAAAAGCAAATGACTTTGAAAATGGATG	natural antisense	NM_001145961	SLC12A4	solute carrier family 12 member 4 isoform b	-	67977376	68002597	136.428	60.4472	7.17649	5.7772	161.212	129.968	118.103	46.8468	57.9227	67.038	69.9811	7.40679	7.10903	7.01365	5.93862	5.98478	5.39465	5.79075
ASHG19A3A054727	0.00123716	2.63772	up	noncoding	AK124821		misc_RNA	1764	chr16	+	67981589	67983353	CACGCAGATTTGCCTGGCTGATTCCAGAATGTTAAAAGCAAATGACTTTGAAAATGGATG	natural antisense	NM_001145963	SLC12A4	solute carrier family 12 member 4 isoform d	-	67977376	67997968	136.428	60.4472	7.17649	5.7772	161.212	129.968	118.103	46.8468	57.9227	67.038	69.9811	7.40679	7.10903	7.01365	5.93862	5.98478	5.39465	5.79075
ASHG19A3A054727	0.00123716	2.63772	up	noncoding	AK124821		misc_RNA	1764	chr16	+	67981589	67983353	CACGCAGATTTGCCTGGCTGATTCCAGAATGTTAAAAGCAAATGACTTTGAAAATGGATG	natural antisense	NM_001145964	SLC12A4	solute carrier family 12 member 4 isoform e	-	67977376	68000781	136.428	60.4472	7.17649	5.7772	161.212	129.968	118.103	46.8468	57.9227	67.038	69.9811	7.40679	7.10903	7.01365	5.93862	5.98478	5.39465	5.79075
ASHG19A3A054727	0.00123716	2.63772	up	noncoding	AK124821		misc_RNA	1764	chr16	+	67981589	67983353	CACGCAGATTTGCCTGGCTGATTCCAGAATGTTAAAAGCAAATGACTTTGAAAATGGATG	natural antisense	NM_001145962	SLC12A4	solute carrier family 12 member 4 isoform c	-	67977376	68002597	136.428	60.4472	7.17649	5.7772	161.212	129.968	118.103	46.8468	57.9227	67.038	69.9811	7.40679	7.10903	7.01365	5.93862	5.98478	5.39465	5.79075
ASHG19A3A054727	0.00123716	2.63772	up	noncoding	AK124821		misc_RNA	1764	chr16	+	67981589	67983353	CACGCAGATTTGCCTGGCTGATTCCAGAATGTTAAAAGCAAATGACTTTGAAAATGGATG	natural antisense	NM_005072	SLC12A4	solute carrier family 12 member 4 isoform a	-	67977376	68002597	136.428	60.4472	7.17649	5.7772	161.212	129.968	118.103	46.8468	57.9227	67.038	69.9811	7.40679	7.10903	7.01365	5.93862	5.98478	5.39465	5.79075
ASHG19A3A037427	0.00747388	2.72246	up	noncoding	ENST00000414355	CR848007.6	Ensembl	343	chr9	-	44021071	44021414	AGCTTTCTGCAGAATGAAACCTCTTTTCCATCCAGAAGCACTGCTGACTGTTTGGTGGTT	intergenic							65.227	30.5805	6.17172	4.72681	69.6556	60.5332	65.4921	41.4967	30.0861	28.6061	22.1332	6.25358	6.06306	6.19853	4.18783	4.70681	5.20901	4.80361
ASHG19A3A021797	0.000116747	2.93697	up	noncoding	AK097849		misc_RNA	1763	chr3	-	153990874	153992637	GGCATTACTGAGTAGAAAATACATTCCAGGTCTAAGAACTGTTTGTTCTTTAGTGGATTT	intergenic							1837.16	563.875	10.7205	9.16615	1898.21	1844.74	1768.52	508.014	575.858	536.521	635.106	10.7428	10.7118	10.7068	9.28948	9.11137	9.01421	9.24955
ASHG19A3A026744	0.00051643	3.61974	up	noncoding	ENST00000507707	CTD-2265D6.1	Ensembl	932	chr5	-	42465501	42468970	TAGCAGATCTCACAACTGGGGAATTGTCAAAGATGAATTAACAGAGTCCCCCAAATACAT	intronic antisense	NM_000163	GHR	growth hormone receptor isoform 1 precursor	+	42424025	42721926	1860.73	469.144	10.7385	8.88258	1869.36	1946.54	1766.31	503.965	497.635	389.089	485.887	10.7224	10.7887	10.7043	8.8787	8.61717	9.00043	9.03402
CUST_416_PI426073487	0.00085328	3.28437	up	noncoding	uc.418+	uc.418	UCR	217	chr17	+	56082227	56082444	CAAAGCATTCTTAATCCATCTCTTCAGATATGTCTACAGAAAGACACATGAAAAGCAAGA	natural antisense	NM_001078166	SRSF1	serine/arginine-rich splicing factor 1 isoform	-	56078279	56084707	120.911	43.8156	7.01315	5.29753	114.126	142.768	105.84	35.4114	44.5929	43.8468	51.4114	6.93551	7.2386	6.86533	5.47548	5.34806	4.97216	5.39442
CUST_416_PI426073487	0.00085328	3.28437	up	noncoding	uc.418+	uc.418	UCR	217	chr17	+	56082227	56082444	CAAAGCATTCTTAATCCATCTCTTCAGATATGTCTACAGAAAGACACATGAAAAGCAAGA	natural antisense	NM_006924	SRSF1	serine/arginine-rich splicing factor 1 isoform	-	56078279	56084707	120.911	43.8156	7.01315	5.29753	114.126	142.768	105.84	35.4114	44.5929	43.8468	51.4114	6.93551	7.2386	6.86533	5.47548	5.34806	4.97216	5.39442
ASHG19A3A034058	9.3069e-06	55.4721	up	noncoding	ENST00000436576	AC079780.3	Ensembl	411	chr7	+	23514414	23520578	AAGGGAAGACTTCCTGTCCCAAAGGAAGTGAACTACAAGAAGAACGATGAGACAAACGCT	intergenic							2142.95	39.6902	10.9446	5.15094	2314.16	2099.48	2015.21	33.5325	43.0808	36.8198	45.3275	11.0339	10.9065	10.8934	5.28655	5.08706	4.88905	5.3411
ASHG19A3A043788	0.00656038	4.23146	up	noncoding	ENST00000418077	RP11-490O24.1	Ensembl	411	chr10	+	34153240	34153651	GCGGCAGTGGTCATTTGACAACAAAAGTCATACCGGAGAAAATATAACATTTAAAAAGAA	intergenic							12764.1	2592.37	13.44	11.3588	14580.2	12136.2	11575.9	3225.89	2920.52	1294.18	2928.89	13.6083	13.3639	13.3477	11.5712	10.4425	11.7644	11.6571
ASHG19A3A014564	0.00107517	3.67413	up	noncoding	AL080107		NRED	1583	chr2	-	163163606	163164969	CTCGTTGTGTCCATATTAAAATTAAAAGTACCTTGCCATAACAAAAGCACATTCTAAGCC	intron sense-overlapping	NM_022168	IFIH1	interferon-induced helicase C domain-containing	-	163123588	163175039	671.889	183.455	9.32753	7.45013	736.583	693.568	585.515	195.265	195.386	148.35	194.82	9.44121	9.36281	9.17858	7.48717	7.16424	7.53883	7.61027
ASHG19A3A034043	0.00652087	3.11324	up	noncoding	ENST00000439823	AC002480.4	Ensembl	557	chr7	+	22629323	22631241	CAGTTCCTATGATATGACTACCTCAGGGCAAGAAAGTCACTGTGTCCCTGCTACAACAAA	intergenic							218.14	80.9923	7.82233	6.18391	235.839	217.227	201.354	119.624	67.4674	70.8648	66.0125	7.92108	7.80487	7.74103	5.85089	6.06897	6.79526	6.02053
ASHG19A3A041661	0.000793572	3.67694	up	noncoding	ENST00000316861	AC002368.2	Ensembl	735	chrX	+	147546209	147546948	GAGCAGAGGAAAGGAAAAGGGCTCAGGTTTAAGCAACTGGAGTCATTCCTACATGATTGT	intergenic							564.258	157.417	9.09917	7.22066	598.691	559.749	534.335	145.944	174.311	170.894	138.517	9.17131	9.07227	9.05393	6.9697	7.37732	7.09518	7.44046
ASHG19A3A050435	0.0197212	2.26124	up	noncoding	ENST00000400214	RP11-397O8.3	Ensembl	611	chr13	+	102454227	102454838	AAGGACGTTGCTGACAGTAAGTGTAAAGGAGAGTTTGATGGCTCAAAGCACCCCACTAAA	intronic antisense	NM_175929	FGF14	fibroblast growth factor 14 isoform 1B	-	102373204	103054124	52.6335	29.3026	5.85558	4.67846	58.0871	59.5021	40.3114	36.8875	24.9592	31.1489	24.2147	5.99363	6.03935	5.53375	4.33035	4.83379	5.0314	4.5183
ASHG19A3A050435	0.0197212	2.26124	up	noncoding	ENST00000400214	RP11-397O8.3	Ensembl	611	chr13	+	102454227	102454838	AAGGACGTTGCTGACAGTAAGTGTAAAGGAGAGTTTGATGGCTCAAAGCACCCCACTAAA	intronic antisense	NM_004115	FGF14	fibroblast growth factor 14 isoform 1A	-	102373204	102568995	52.6335	29.3026	5.85558	4.67846	58.0871	59.5021	40.3114	36.8875	24.9592	31.1489	24.2147	5.99363	6.03935	5.53375	4.33035	4.83379	5.0314	4.5183
ASHG19A3L0003536	0.0160165	12.4073	up	noncoding	BE244504	lincRNA-FAM110A	lincRNA	447	chr20	-	837118	837565	GTGCTGTGTGTGTGGAAACCCAAATATGACCGTAGAGGGTGGAGCCACAAAACCAAGCTG	intergenic							552.516	61.1245	9.05172	5.41861	649.912	598.284	409.352	41.2014	85.2099	13.9239	104.163	9.2822	9.16177	8.71119	6.53242	3.57864	5.20015	6.36322
ASHG19A3A027940	0.00085086	4.83869	up	noncoding	ENST00000508179	CTD-2001E22.2	Ensembl	1799	chr5	+	9546311	9550721	CCAGGGTGTTATTTTCCGACATTGAGTCTTGTATATATCTTGAATGTCTATAAGCAAAGA	bidirectional	NM_003966	SEMA5A	semaphorin-5A precursor	-	9035137	9546233	141.599	35.1024	7.23488	4.96026	142.038	155.418	127.342	42.6469	34.4703	34.3462	28.9464	7.23384	7.35334	7.11744	4.60472	4.97906	5.24947	5.00779
ASHG19A3A053524	0.00247674	2.72467	up	noncoding	ENST00000400791	RP11-517A5.1	Ensembl	559	chr16	-	16187889	16189066	GAAAACACCACAGAATCATGCAGATCAAGAGGTTCAAATCTTCGTGTTCACCTTAAGAAC	intronic antisense	NM_004996	ABCC1	multidrug resistance-associated protein 1	+	16043433	16236930	3368.01	1078.9	11.58	10.1339	3163.4	3511.56	3429.07	814.073	1158.67	1251.74	1091.1	11.4702	11.6215	11.6484	10.1135	10.3928	9.73144	10.2981
ASHG19A3A053524	0.00247674	2.72467	up	noncoding	ENST00000400791	RP11-517A5.1	Ensembl	559	chr16	-	16187889	16189066	GAAAACACCACAGAATCATGCAGATCAAGAGGTTCAAATCTTCGTGTTCACCTTAAGAAC	intronic antisense	NM_019899	ABCC1	multidrug resistance-associated protein 1	+	16043433	16236930	3368.01	1078.9	11.58	10.1339	3163.4	3511.56	3429.07	814.073	1158.67	1251.74	1091.1	11.4702	11.6215	11.6484	10.1135	10.3928	9.73144	10.2981
ASHG19A3A053524	0.00247674	2.72467	up	noncoding	ENST00000400791	RP11-517A5.1	Ensembl	559	chr16	-	16187889	16189066	GAAAACACCACAGAATCATGCAGATCAAGAGGTTCAAATCTTCGTGTTCACCTTAAGAAC	intronic antisense	NM_019898	ABCC1	multidrug resistance-associated protein 1	+	16043433	16236930	3368.01	1078.9	11.58	10.1339	3163.4	3511.56	3429.07	814.073	1158.67	1251.74	1091.1	11.4702	11.6215	11.6484	10.1135	10.3928	9.73144	10.2981
ASHG19A3A053524	0.00247674	2.72467	up	noncoding	ENST00000400791	RP11-517A5.1	Ensembl	559	chr16	-	16187889	16189066	GAAAACACCACAGAATCATGCAGATCAAGAGGTTCAAATCTTCGTGTTCACCTTAAGAAC	intronic antisense	NM_019900	ABCC1	multidrug resistance-associated protein 1	+	16043433	16236930	3368.01	1078.9	11.58	10.1339	3163.4	3511.56	3429.07	814.073	1158.67	1251.74	1091.1	11.4702	11.6215	11.6484	10.1135	10.3928	9.73144	10.2981
ASHG19A3A053524	0.00247674	2.72467	up	noncoding	ENST00000400791	RP11-517A5.1	Ensembl	559	chr16	-	16187889	16189066	GAAAACACCACAGAATCATGCAGATCAAGAGGTTCAAATCTTCGTGTTCACCTTAAGAAC	intronic antisense	NM_019862	ABCC1	multidrug resistance-associated protein 1	+	16043433	16236930	3368.01	1078.9	11.58	10.1339	3163.4	3511.56	3429.07	814.073	1158.67	1251.74	1091.1	11.4702	11.6215	11.6484	10.1135	10.3928	9.73144	10.2981
CUST_171_PI426073487	0.00029964	7.97774	up	noncoding	uc.173+	uc.173	UCR	276	chr5	+	133726159	133726435	AATTCTTTAGATTTTTAAATTGGAGAAAAGCACTTAAAGTTTTTTATATATGAATATTAC	exon sense-overlapping	NM_003337	UBE2B	ubiquitin-conjugating enzyme E2 B	+	133706869	133727799	1787.99	215.54	10.6794	7.6834	1733.76	1834.61	1795.62	198.031	221.524	170.699	271.904	10.6088	10.7018	10.7276	7.99585	7.37605	7.56084	7.80087
ASHG19A3A052113	1.62781e-05	2.69312	up	noncoding	AK021664		RNAdb	1800	chr15	-	48426829	48428628	ATAGCAGGTATTACGCCGTGCTGCAAGGTTATGGTTCTCCAGATGGACACCATTACATTT	natural antisense	NM_205850	SLC24A5	sodium/potassium/calcium exchanger 5 precursor	+	48413168	48434589	343.249	136.057	8.43365	7.00438	377.84	348.568	303.337	134.506	123.425	133.523	152.772	8.56218	8.44035	8.29843	7.11986	7.00576	6.97283	6.91907
ASHG19A3A025477	0.000216756	5.5313	up	noncoding	ENST00000244249	RP11-663P9.2	Ensembl	390	chr4	+	43900473	43901368	GATAGGAAAGAAAAACTTATGCAGGAAGGAAAATTGGATCGAACAGTTCACCTATCATAT	intergenic							2555.58	425.304	11.1903	8.72273	2626.04	2485.49	2555.2	522.492	366.588	411.157	400.98	11.2041	11.137	11.23	8.57748	8.70303	9.0582	8.55222
ASHG19A3A015390	0.0223727	2.18756	up	noncoding	ENST00000421721	AC066692.3	Ensembl	457	chr2	+	24123562	24124019	AATATTATTAATACAAGACCAAGCAAATCCTCCCACCCAACTGGAAACATGAGTCATCCA	intronic antisense	NM_017552	ATAD2B	ATPase family AAA domain-containing protein 2B	-	23971533	24149934	1351.36	581.53	10.2865	9.15714	1449.28	1294.72	1310.07	894.48	514.282	473.233	444.125	10.3628	10.2164	10.2802	8.73854	8.92025	9.87795	9.0918
ASHG19A3A040083	5.69559e-05	3.84661	up	noncoding	uc004ebr.1	AK057701	UCSC_knowngene	2597	chrX	-	73498208	73512435	ATCCCACTTGACAGTTTAGAAGTGGATTGATAATACTCTTCTGGCTTAAAACCCTTCTTC	intergenic							576.23	152.753	9.12633	7.18274	597.345	611.97	519.374	153.43	149.865	155.308	152.41	9.16919	9.19558	9.01421	7.11593	7.23504	7.16903	7.21096
ASHG19A3A034290	0.00100492	2.04781	up	noncoding	ENST00000436056	AC073115.7	Ensembl	532	chr7	+	46030503	46040497	CCTAAAAAATGGAAGCACAAACTGTACAACAAATACTCTCCATTCAAGTTGAAGTTCTCA	intergenic							78.3334	46.2543	6.42585	5.39177	85.1023	75.9987	73.8993	43.8104	46.3542	48.6409	46.2118	6.53377	6.37441	6.36936	5.31593	5.50285	5.29482	5.45347
ASHG19A3A008678	0.00371953	2.01039	up	noncoding	BC033590		misc_RNA	1074	chr17	-	60703900	60704878	GCAAAGAAGACACATTTCTCCTACCACGAGTAATCAAAAACACTATGAAACTGTAATATG	natural antisense	NM_006039	MRC2	C-type mannose receptor 2	+	60704761	60770952	594.364	291.28	9.1664	8.15892	594.771	647.288	541.035	304.228	320.108	270.895	269.89	9.16033	9.269	9.06987	7.9829	8.07973	8.21548	8.35758
ASHG19A3A048291	0.00436924	2.09962	up	noncoding	NR_002803	RPL13P5	RefSeq_NR	634	chr12	+	6993144	6993766	GTCATCGCTGACTAGGAGGAAAACTTCCAGGCCTTGTTAGTCTCTGTATGGCCCATGCAA	intergenic							603.647	287.984	9.18818	8.11805	657.775	568.007	585.159	236.822	337.602	234.066	343.445	9.29684	9.08983	9.17786	8.34406	7.85649	7.83396	8.43767
ASHG19A3L0000453	0.000493128	4.83674	up	noncoding	BC007632	lincRNA-RIMBP2-1	lincRNA	3902	chr12	-	130916193	131200826	AGAGATGACTTTTCTAGAGAAGAGTAGAAACACAGCGGCAGAAACACAGCTCTGCACTTC	exon sense-overlapping	NM_015347	RIMBP2	RIMS-binding protein 2	-	130880680	131002410	101.927	26.1603	6.78463	4.5106	101.307	113.386	91.0896	29.3367	19.1998	24.8327	31.2721	6.77641	6.92189	6.65561	4.72303	4.49387	4.69021	4.13529
ASHG19A3A015537	0.000621975	13.104	up	noncoding	ENST00000395092	GAPDHP25	Ensembl	1002	chr2	+	38512551	38513558	ATGTTCATGATGGGCGTGAACCATAAGAAATATGAAAACAGCCTCAAGATCATCAGCAAT	intergenic							617.319	51.5559	9.21928	5.50735	574.463	672.197	605.298	31.7807	56.0574	54.2427	64.1427	9.10647	9.32372	9.22766	5.81055	5.66669	4.81327	5.73887
ASHG19A3A012303	0.00196739	4.13456	up	noncoding	NR_024282	LOC113230	RefSeq_NR	1329	chr19	+	14183820	14185873	TTTGTGAAATTGACCAGCCCCCTCTATAAAACTTACAGTCCCCCATTGGGAAACTGACCA	intergenic							2752.55	597.498	11.2893	9.24154	2888.97	2950.35	2418.33	757.569	589.34	496.615	546.467	11.3426	11.3761	11.1491	9.06058	8.99977	9.61978	9.28601
ASHG19A3A019910	0.000125183	4.07892	up	noncoding	AK125234		misc_RNA	1684	chr22	-	44349516	44351200	AGGCTGTCTGTGATAGTTAAGATGTATATATTAAAGGCTGTCTGTGATGGTTACAATGTA	bidirectional	NM_015380	SAMM50	sorting and assembly machinery component 50	+	44351260	44392412	2659.88	580.248	11.2405	9.21235	2856.44	2755.1	2368.1	616.436	556.439	562.207	585.912	11.3258	11.2747	11.1212	9.16709	9.18465	9.29965	9.198
ASHG19A3A016340	0.00151964	3.41175	up	noncoding	ENST00000448112	AC068137.3	Ensembl	561	chr2	+	131028168	131029845	CGCCTAATTTCATATGAAGTTACCCTAGCCATCAGCCTATTATCAGTTCTACTGATAAGC	intergenic							4173.48	1074.64	11.8861	10.1156	4301.11	4037.49	4181.86	1105.62	1241.62	727.397	1223.9	11.906	11.8207	11.9315	10.2913	9.57974	10.1918	10.3994
ASHG19A3A052591	0.00623682	3.23432	up	noncoding	ENST00000471472	CTD-3221M10.1	Ensembl	723	chr15	-	100091582	100092305	CACATATTGCATGGGGGTAACCAAGCCTGAAGTCAGTAAAAATCTACAAGCCTGGTTATG	intergenic							1460.31	431.63	10.3932	8.69974	1483.52	1348.77	1548.64	301.796	540.106	315.018	569.599	10.396	10.2695	10.514	9.12879	8.3062	8.20266	9.16131
CUST_314_PI426073487	0.044445	2.0188	up	noncoding	uc.316+	uc.316	UCR	240	chr10	+	126905564	126905804	TGTCAGAAGCTCAAAGCCACATTGTTTCACTTGACAATCTTCCCAGAGGTGGGGAAAAAA	intergenic							30.201	20.5259	5.11144	4.09794	30.6401	26.4743	33.4885	12.2817	20.5515	23.3338	25.9368	5.09678	4.9634	5.27414	4.43397	4.39787	3.32307	4.23686
ASHG19A3A053659	1.85523e-05	4.03838	up	noncoding	ENST00000379752	RP11-110J1.2	Ensembl	1532	chr1	-	157029022	157030554	GCATCCTCTGATGGCACTGTAAAGATCTGGAATATGAAGACCACAGAATGTTCAGATACC	intergenic							1234.12	288	10.1613	8.14754	1274.55	1308.98	1118.84	280.453	280.581	281.527	309.44	10.1877	10.2302	10.0661	8.1911	8.13724	8.09197	8.16986
ASHG19A3A025241	6.4732e-06	92.8645	up	noncoding	NR_026892	LOC84740	RefSeq_NR	6810	chr4	+	7755816	7780652	CCACGGGGGGCTTTTTACCCTTGAGCTGTTGAAATAAACATATAAGAACATTAAAAATAA	natural antisense	NM_001134647	AFAP1	actin filament-associated protein 1 isoform a	-	7760439	7941653	66719.7	596.528	15.7887	9.25169	75749.8	64860.5	59548.8	603.02	625.093	511.226	646.774	15.9351	15.7495	15.6816	9.316	9.04106	9.26972	9.37997
ASHG19A3A025241	6.4732e-06	92.8645	up	noncoding	NR_026892	LOC84740	RefSeq_NR	6810	chr4	+	7755816	7780652	CCACGGGGGGCTTTTTACCCTTGAGCTGTTGAAATAAACATATAAGAACATTAAAAATAA	natural antisense	NM_198595	AFAP1	actin filament-associated protein 1	-	7760439	7941653	66719.7	596.528	15.7887	9.25169	75749.8	64860.5	59548.8	603.02	625.093	511.226	646.774	15.9351	15.7495	15.6816	9.316	9.04106	9.26972	9.37997
ASHG19A3A048668	0.0415217	2.50819	up	noncoding	AK022887		RNAdb	2629	chr12	+	54513394	54516023	AAAGACCACCCTTTTGTCCATCTTCTTCACATGGGTGGATGTGAGAAAAGTTTCTCTCCC	intergenic							98.4509	52.0256	6.74004	5.41339	95.3311	107.176	92.8452	74.7952	26.3917	73.2778	33.6377	6.69221	6.84557	6.68234	4.83362	6.11654	6.09886	4.60455
ASHG19A3A007730	1.33222e-05	2.14247	up	noncoding	NR_033196	ZFAND1	RefSeq_NR	691	chr8	-	82615149	82633539	TGTGATGATTGTTCAGGAATATTTTGGTGACTGTAATCAATGAGAGACTGAAGACAGATC	exon sense-overlapping	NM_001170797	ZFAND1	AN1-type zinc finger protein 1 isoform c	-	82615148	82633539	195.619	102.355	7.6773	6.57802	205.053	198.811	182.994	101.261	98.3407	100.425	109.392	7.73348	7.68498	7.61343	6.60923	6.57741	6.55078	6.57466
ASHG19A3A007730	1.33222e-05	2.14247	up	noncoding	NR_033196	ZFAND1	RefSeq_NR	691	chr8	-	82615149	82633539	TGTGATGATTGTTCAGGAATATTTTGGTGACTGTAATCAATGAGAGACTGAAGACAGATC	exon sense-overlapping	NM_024699	ZFAND1	AN1-type zinc finger protein 1 isoform a	-	82613565	82633539	195.619	102.355	7.6773	6.57802	205.053	198.811	182.994	101.261	98.3407	100.425	109.392	7.73348	7.68498	7.61343	6.60923	6.57741	6.55078	6.57466
ASHG19A3A007730	1.33222e-05	2.14247	up	noncoding	NR_033196	ZFAND1	RefSeq_NR	691	chr8	-	82615149	82633539	TGTGATGATTGTTCAGGAATATTTTGGTGACTGTAATCAATGAGAGACTGAAGACAGATC	exon sense-overlapping	NM_001170796	ZFAND1	AN1-type zinc finger protein 1 isoform b	-	82613565	82633539	195.619	102.355	7.6773	6.57802	205.053	198.811	182.994	101.261	98.3407	100.425	109.392	7.73348	7.68498	7.61343	6.60923	6.57741	6.55078	6.57466
ASHG19A3A035309	0.00028558	6.50985	up	noncoding	AL359058		misc_RNA	910	chr7	+	150038859	150039693	TGGAATTCATAAGGTGAGCAGAAACTCAAGGAAAACTGTCCAAATACCGGCTCGACTCCT	bidirectional	NM_002889	RARRES2	retinoic acid receptor responder protein 2	-	150035406	150038763	113.069	21.6494	6.93165	4.22902	118.1	114.053	107.053	19.4312	22.3218	25.3819	19.4627	6.9839	6.92981	6.88122	3.9809	4.52475	4.05675	4.35368
ASHG19A3A029620	0.0112082	2.04546	up	noncoding	ENST00000457298	GPR53P	Ensembl	1084	chr6	-	29505480	29506564	TAAAGTTGTTCTCCCAAGAGCTTTGTTGAATGAGATGGAAGGTGGAGGAAACAAGGGGTT	intergenic							24.0648	16.6686	4.80112	3.7687	27.4255	22.6692	22.0997	11.8824	13.2636	17.3197	24.2088	4.94227	4.76092	4.70018	4.32893	3.93436	3.27467	3.53682
ASHG19A3H0000202	3.62024e-06	11.6448	up	noncoding	nc-HOXD9-16-	nc-HOXD9-16	HOX cluster	558	chr2	+	176984428	176984986	ATTAAGAAAACCCACAAGTTGGAGGGAGGGGGACTTAAAAAGCACATTACAATGTATCTT	exon sense-overlapping	NM_002148	HOXD10	homeobox protein Hox-D10	+	176981491	176984670	766.927	68.2422	9.51363	5.97201	788.914	786.148	725.72	65.8366	61.8413	73.691	71.5998	9.53531	9.53157	9.47401	5.9707	6.12425	5.90338	5.88971
ASHG19A3A029987	0.000589225	2.52681	up	noncoding	ENST00000434225	RBMXP1	Ensembl	306	chr6	-	48180387	48181905	ATGATCATGATCATGACTATTCAGATCATCCAAGTGGAAGTTCCTACAGAGATTCATATG	intergenic							2355.99	817.363	11.0667	9.72941	2665.1	2217.9	2184.96	768.517	904.567	702.004	894.363	11.2208	10.9737	11.0056	9.81714	9.52418	9.64137	9.93494
ASHG19A3A026979	0.000202778	2.65441	up	noncoding	AK058164		RNAdb	1433	chr5	-	76721767	76723199	CTGACAGCCACATTTTTAAAAATATATTTTGTTTACCTTTAGGCTCACCCTGTGTCACTA	natural antisense	NM_001029854	PDE8B	high affinity cAMP-specific and IBMX-insensitive	+	76506705	76724080	487.188	188.488	8.90451	7.49612	507.459	497.413	456.691	208.345	170.502	185.668	189.439	8.94659	8.91896	8.84798	7.43861	7.50497	7.63343	7.40747
ASHG19A3A026979	0.000202778	2.65441	up	noncoding	AK058164		RNAdb	1433	chr5	-	76721767	76723199	CTGACAGCCACATTTTTAAAAATATATTTTGTTTACCTTTAGGCTCACCCTGTGTCACTA	natural antisense	NM_001029851	PDE8B	high affinity cAMP-specific and IBMX-insensitive	+	76506705	76724080	487.188	188.488	8.90451	7.49612	507.459	497.413	456.691	208.345	170.502	185.668	189.439	8.94659	8.91896	8.84798	7.43861	7.50497	7.63343	7.40747
ASHG19A3A026979	0.000202778	2.65441	up	noncoding	AK058164		RNAdb	1433	chr5	-	76721767	76723199	CTGACAGCCACATTTTTAAAAATATATTTTGTTTACCTTTAGGCTCACCCTGTGTCACTA	natural antisense	NM_003719	PDE8B	high affinity cAMP-specific and IBMX-insensitive	+	76506705	76724080	487.188	188.488	8.90451	7.49612	507.459	497.413	456.691	208.345	170.502	185.668	189.439	8.94659	8.91896	8.84798	7.43861	7.50497	7.63343	7.40747
ASHG19A3A026979	0.000202778	2.65441	up	noncoding	AK058164		RNAdb	1433	chr5	-	76721767	76723199	CTGACAGCCACATTTTTAAAAATATATTTTGTTTACCTTTAGGCTCACCCTGTGTCACTA	natural antisense	NM_001029853	PDE8B	high affinity cAMP-specific and IBMX-insensitive	+	76506705	76724080	487.188	188.488	8.90451	7.49612	507.459	497.413	456.691	208.345	170.502	185.668	189.439	8.94659	8.91896	8.84798	7.43861	7.50497	7.63343	7.40747
ASHG19A3A026979	0.000202778	2.65441	up	noncoding	AK058164		RNAdb	1433	chr5	-	76721767	76723199	CTGACAGCCACATTTTTAAAAATATATTTTGTTTACCTTTAGGCTCACCCTGTGTCACTA	natural antisense	NM_001029852	PDE8B	high affinity cAMP-specific and IBMX-insensitive	+	76506705	76724080	487.188	188.488	8.90451	7.49612	507.459	497.413	456.691	208.345	170.502	185.668	189.439	8.94659	8.91896	8.84798	7.43861	7.50497	7.63343	7.40747
ASHG19A3A021396	0.00814419	2.34262	up	noncoding	ENST00000498515	RP11-696F10.1	Ensembl	228	chr3	-	109696386	109696614	AAGAAAAAAGAGATGCTGCAGATGGCATGTGCCTAGTGTCACAGCAACTGCTGTATTCAG	intergenic							669.72	284.842	9.32828	8.10016	739.297	606.141	663.722	199.252	296.19	317.525	326.402	9.44747	9.18148	9.3559	8.26981	8.32015	7.56777	8.24293
ASHG19A3A044034	0.000737753	2.48658	up	noncoding	ENST00000415623	RP11-9E13.4	Ensembl	438	chr10	+	70184316	70184754	GGTACTCACCCAAACAAGGTGGTTATCACCAGGCTAAATCTCAACAAGGATCGGAAAAAA	intronic antisense	NM_001080449	DNA2	DNA2-like helicase	-	70173820	70231730	2776.02	973.489	11.3013	9.9871	2866.67	2815.59	2645.79	816.529	898.952	1003.81	1174.67	11.3323	11.2968	11.2747	10.2239	10.0621	9.73606	9.92635
ASHG19A3A007974	8.97622e-05	4.37085	up	noncoding	ENST00000450587	AC005324.4	Ensembl	669	chr17	-	15607545	15608214	TGAAGGGACCCCATATGCTGGAGGTCTGTTCCGCATGAAACTCCTGCTGGGGAAGGACTT	intronic antisense	NM_020652	ZNF286A	zinc finger protein 286A	+	15602890	15624100	1236.18	267.624	10.1634	8.03548	1257.72	1290.09	1160.73	273.549	281.717	244.602	270.627	10.1639	10.2081	10.1182	7.9882	7.92508	8.05439	8.17426
ASHG19A3A007974	8.97622e-05	4.37085	up	noncoding	ENST00000450587	AC005324.4	Ensembl	669	chr17	-	15607545	15608214	TGAAGGGACCCCATATGCTGGAGGTCTGTTCCGCATGAAACTCCTGCTGGGGAAGGACTT	intronic antisense	NM_001130842	ZNF286A	zinc finger protein 286A	+	15602890	15624100	1236.18	267.624	10.1634	8.03548	1257.72	1290.09	1160.73	273.549	281.717	244.602	270.627	10.1639	10.2081	10.1182	7.9882	7.92508	8.05439	8.17426
ASHG19A3A022599	0.0165499	2.57535	up	noncoding	ENST00000422983	RP11-25O10.1	Ensembl	703	chr1	+	53038785	53039488	AGTTGCAATCTCATCGCTGGAATGTTCCAGCAGTTGAACAAACTGAGAAAGAATGCCTTT	intergenic							400.276	170.802	8.64981	7.28504	413.395	392.714	394.719	96.7357	214.915	162.384	209.174	8.68169	8.607	8.66073	7.59406	7.30331	6.48694	7.75584
ASHG19A3A040520	0.000808204	2.04378	up	noncoding	G36544		misc_RNA	463	chrX	-	150158777	150159240	CCAAGTGGCCTCAACTTGACAGCCTCTTTAAAACTCAATGTTTGCCTAATCAAAGATCAT	natural antisense	NM_005342	HMGB3	high mobility group protein B3	+	150151762	150159248	35.4359	22.5546	5.31925	4.28801	44.2062	31.9898	30.1117	21.2092	21.7899	18.8581	28.3611	5.61059	5.21475	5.1324	4.57121	4.06974	4.19088	4.3202
ASHG19A3A007646	0.000263625	2.57022	up	noncoding	NR_028388	FUS	RefSeq_NR	5084	chr16	+	31191430	31206190	TCTTCTTATGGCCAGAGCCAGAACACAGGCTATGGAACTCAGTCAACTCCCCAGGGATAT	exon sense-overlapping	NM_001170634	FUS	RNA-binding protein FUS isoform 2	+	31191430	31206192	124.428	56.9832	7.06049	5.6986	128.192	130.088	115.003	52.0609	55.4143	52.8043	67.6535	7.09286	7.11132	6.97731	5.88752	5.62658	5.55774	5.72259
ASHG19A3A007646	0.000263625	2.57022	up	noncoding	NR_028388	FUS	RefSeq_NR	5084	chr16	+	31191430	31206190	TCTTCTTATGGCCAGAGCCAGAACACAGGCTATGGAACTCAGTCAACTCCCCAGGGATAT	exon sense-overlapping	NM_004960	FUS	RNA-binding protein FUS isoform 1	+	31191430	31206192	124.428	56.9832	7.06049	5.6986	128.192	130.088	115.003	52.0609	55.4143	52.8043	67.6535	7.09286	7.11132	6.97731	5.88752	5.62658	5.55774	5.72259
ASHG19A3A007646	0.000263625	2.57022	up	noncoding	NR_028388	FUS	RefSeq_NR	5084	chr16	+	31191430	31206190	TCTTCTTATGGCCAGAGCCAGAACACAGGCTATGGAACTCAGTCAACTCCCCAGGGATAT	exon sense-overlapping	NM_001170937	FUS	RNA-binding protein FUS isoform 3	+	31191430	31206192	124.428	56.9832	7.06049	5.6986	128.192	130.088	115.003	52.0609	55.4143	52.8043	67.6535	7.09286	7.11132	6.97731	5.88752	5.62658	5.55774	5.72259
ASHG19A3A020171	0.000419951	3.03437	up	noncoding	uc010gto.2	LOC96610	UCSC_knowngene	3179	chr22	+	22652462	22664057	AAGCCACTGGGTTGCAAGTTCAGATGGTCTTTCTTGTTTTTCTTAGCTAATTGTAAGTAA	intergenic							763.745	246.815	9.50962	7.90822	779.657	809.685	701.894	258.792	244.276	215.353	268.839	9.52085	9.57624	9.43175	7.9773	7.72577	7.97243	7.95738
ASHG19A3A007590	0.000298647	27.0959	up	noncoding	NR_027878	ADAM9	RefSeq_NR	4005	chr8	+	38854504	38962777	ATGTTCAGAAAAAGTGTCATGGACATGGGAAATGAATACTGCATTGAGGGACGGACTTCT	exon sense-overlapping	NM_003816	ADAM9	disintegrin and metalloproteinase	+	38854504	38962779	219.811	10.5535	7.83204	3.07204	223.467	233.133	202.833	8.71732	5.89618	10.4784	17.1219	7.84736	7.89995	7.74881	3.7823	3.1421	2.83294	2.53081
ASHG19A3A007590	0.000298647	27.0959	up	noncoding	NR_027878	ADAM9	RefSeq_NR	4005	chr8	+	38854504	38962777	ATGTTCAGAAAAAGTGTCATGGACATGGGAAATGAATACTGCATTGAGGGACGGACTTCT	bidirectional	NM_031940	TM2D2	TM2 domain-containing protein 2 isoform b	-	38846326	38854041	219.811	10.5535	7.83204	3.07204	223.467	233.133	202.833	8.71732	5.89618	10.4784	17.1219	7.84736	7.89995	7.74881	3.7823	3.1421	2.83294	2.53081
ASHG19A3A007590	0.000298647	27.0959	up	noncoding	NR_027878	ADAM9	RefSeq_NR	4005	chr8	+	38854504	38962777	ATGTTCAGAAAAAGTGTCATGGACATGGGAAATGAATACTGCATTGAGGGACGGACTTCT	bidirectional	NM_001024380	TM2D2	TM2 domain-containing protein 2 isoform b	-	38846326	38854041	219.811	10.5535	7.83204	3.07204	223.467	233.133	202.833	8.71732	5.89618	10.4784	17.1219	7.84736	7.89995	7.74881	3.7823	3.1421	2.83294	2.53081
ASHG19A3A007590	0.000298647	27.0959	up	noncoding	NR_027878	ADAM9	RefSeq_NR	4005	chr8	+	38854504	38962777	ATGTTCAGAAAAAGTGTCATGGACATGGGAAATGAATACTGCATTGAGGGACGGACTTCT	bidirectional	NM_001024381	TM2D2	TM2 domain-containing protein 2 isoform b	-	38846326	38854041	219.811	10.5535	7.83204	3.07204	223.467	233.133	202.833	8.71732	5.89618	10.4784	17.1219	7.84736	7.89995	7.74881	3.7823	3.1421	2.83294	2.53081
ASHG19A3A007590	0.000298647	27.0959	up	noncoding	NR_027878	ADAM9	RefSeq_NR	4005	chr8	+	38854504	38962777	ATGTTCAGAAAAAGTGTCATGGACATGGGAAATGAATACTGCATTGAGGGACGGACTTCT	bidirectional	NM_078473	TM2D2	TM2 domain-containing protein 2 isoform a	-	38846326	38854041	219.811	10.5535	7.83204	3.07204	223.467	233.133	202.833	8.71732	5.89618	10.4784	17.1219	7.84736	7.89995	7.74881	3.7823	3.1421	2.83294	2.53081
ASHG19A3H0000205	0.00386305	2.84196	up	noncoding	nc-HOXC10-129-	nc-HOXC10-129	HOX cluster	260	chr12	+	54378513	54378773	CTCCACCCCTCTACCTCCCCTGCCGCCCGGGGGGCGCTTCCTTTGTTCGCGGGGAAGGGC	intergenic							14458	4221.41	13.6165	12.1096	14014.1	16568.1	12791.9	2726.68	4782.53	4805.11	4571.33	13.5487	13.8065	13.4944	12.2059	12.3487	11.5153	12.3686
ASHG19A3A008387	0.000246944	4.50433	up	noncoding	AK023939		misc_RNA	3065	chr17	-	41434887	41437957	GGTACGTCACTATCCAGTCTACTTTTTCCATTGACGTGGCTGAGTCATATGTAGTATGAC	intergenic							201.029	51.3468	7.71397	5.54265	208.076	208.879	186.133	59.205	49.6317	45.7867	50.7638	7.75195	7.75405	7.6359	5.45625	5.41387	5.74618	5.55432
ASHG19A3A054851	0.00066391	2.03265	up	noncoding	uc002fih.2	AK057887	UCSC_knowngene	3732	chr16	+	84696933	84700665	TTTAACATGAACAGAATGTGTGGTTCTGAAGGTGTGTGGGGGTCTCAAGAAATTGTCCTT	intergenic							1720.36	747.005	10.6198	9.59649	1856.88	1771.22	1532.97	743.179	732.352	766.466	746.025	10.7118	10.6491	10.4986	9.53188	9.65116	9.58793	9.61497
ASHG19A3A031700	8.92074e-06	8.52179	up	noncoding	ENST00000402650	RP11-789A7.1	Ensembl	695	chr6	+	71874778	71875473	TGTCAACAGGAAATGATGAATGTCAAGCAATTCATTGATAAACTCCTACCTCCAATTGAT	intergenic							3379.75	362.375	11.5809	8.48978	3659.37	3407.17	3072.73	376.77	343.213	348.554	380.963	11.6694	11.5795	11.4939	8.50236	8.45005	8.54311	8.4636
ASHG19A3H0000181	0.0169802	2.73803	up	noncoding	nc-HOXD3-39-	nc-HOXD3-39	HOX cluster	2228	chr2	+	177018599	177020827	TGGGGAAAGAAAACAAAACCTCTATGCACTGGGTCATTAGATAATGACTGAATTTTCTGT	intergenic							27.3723	13.573	4.93769	3.48455	37.3519	17.6637	27.1014	15.355	11.3051	15.3423	12.2897	5.37423	4.45192	4.98691	3.23225	3.73726	3.68863	3.28004
ASHG19A3A040172	0.00010235	2.20315	up	noncoding	ENST00000404582	RP11-568G11.3	Ensembl	967	chr1	+	220426911	220427878	AGAATTCTGCAACTTTGTTTAGTGCCAGCGATTATGAAGTGGCTCCTCCTGAGTACCATC	intronic antisense	NM_012414	RAB3GAP2	rab3 GTPase-activating protein non-catalytic	-	220321609	220445843	24466.4	8714.95	14.3662	13.2266	25660.7	24727.3	23011.2	8603.3	8826.31	8464.33	8965.88	14.3997	14.3756	14.3232	13.2041	13.1836	13.2211	13.2975
ASHG19A3A043980	6.9641e-05	2.10443	up	noncoding	AK130049		NRED	2232	chr10	+	60588954	60591182	GATGCAATGAAGGGAATATGACACTACAGTATACAGAGTTGTTGTTATATGATGCACAAA	intergenic							11845	4567.16	13.3389	12.2655	12676.6	11802.9	11055.6	4473.12	4538.15	4489.87	4767.5	13.4155	13.3246	13.2766	12.27	12.2567	12.2464	12.2888
ASHG19A3A007656	1.51998e-05	8.26031	up	noncoding	NR_028412	APOC1P1	RefSeq_NR	939	chr19	+	45430059	45434643	GTGGTTCTGTCGATCGTCTTGGAAGCCAGGCGTTGTGGTGCGCGCTTGGCTACTTGGGAG	intergenic							3612.03	398.301	11.6783	8.63211	3786.32	3650.94	3398.83	392.186	412.903	397.362	390.751	11.7209	11.6787	11.6353	8.53891	8.64951	8.60393	8.73608
ASHG19A3A026980	0.000182186	2.74836	up	noncoding	AK092482		RNAdb	2386	chr5	-	76723251	76725632	GCATGGCACAACATACTGCATGGGCTTACACCCAGAAAATTTGGATTTTAATAAAAATTT	natural antisense	NM_001029854	PDE8B	high affinity cAMP-specific and IBMX-insensitive	+	76506705	76724080	3381.04	1057.29	11.5814	10.1228	3516.95	3599.61	3026.56	1046.39	1056.09	998.354	1128.35	11.6134	11.6553	11.4755	10.1654	10.0545	10.1117	10.1597
ASHG19A3A026980	0.000182186	2.74836	up	noncoding	AK092482		RNAdb	2386	chr5	-	76723251	76725632	GCATGGCACAACATACTGCATGGGCTTACACCCAGAAAATTTGGATTTTAATAAAAATTT	natural antisense	NM_001029851	PDE8B	high affinity cAMP-specific and IBMX-insensitive	+	76506705	76724080	3381.04	1057.29	11.5814	10.1228	3516.95	3599.61	3026.56	1046.39	1056.09	998.354	1128.35	11.6134	11.6553	11.4755	10.1654	10.0545	10.1117	10.1597
ASHG19A3A026980	0.000182186	2.74836	up	noncoding	AK092482		RNAdb	2386	chr5	-	76723251	76725632	GCATGGCACAACATACTGCATGGGCTTACACCCAGAAAATTTGGATTTTAATAAAAATTT	natural antisense	NM_003719	PDE8B	high affinity cAMP-specific and IBMX-insensitive	+	76506705	76724080	3381.04	1057.29	11.5814	10.1228	3516.95	3599.61	3026.56	1046.39	1056.09	998.354	1128.35	11.6134	11.6553	11.4755	10.1654	10.0545	10.1117	10.1597
ASHG19A3A026980	0.000182186	2.74836	up	noncoding	AK092482		RNAdb	2386	chr5	-	76723251	76725632	GCATGGCACAACATACTGCATGGGCTTACACCCAGAAAATTTGGATTTTAATAAAAATTT	natural antisense	NM_001029853	PDE8B	high affinity cAMP-specific and IBMX-insensitive	+	76506705	76724080	3381.04	1057.29	11.5814	10.1228	3516.95	3599.61	3026.56	1046.39	1056.09	998.354	1128.35	11.6134	11.6553	11.4755	10.1654	10.0545	10.1117	10.1597
ASHG19A3A026980	0.000182186	2.74836	up	noncoding	AK092482		RNAdb	2386	chr5	-	76723251	76725632	GCATGGCACAACATACTGCATGGGCTTACACCCAGAAAATTTGGATTTTAATAAAAATTT	natural antisense	NM_001029852	PDE8B	high affinity cAMP-specific and IBMX-insensitive	+	76506705	76724080	3381.04	1057.29	11.5814	10.1228	3516.95	3599.61	3026.56	1046.39	1056.09	998.354	1128.35	11.6134	11.6553	11.4755	10.1654	10.0545	10.1117	10.1597
ASHG19A3A007679	0.00702904	2.76604	up	noncoding	NR_028581	G6PC3	RefSeq_NR	1848	chr17	+	42148097	42153711	AGTGGCTCAACCTCATCTTCAAGTGAAGCATGCTTTGTGCTGGGCATCACGGTAGCTGCT	exon sense-overlapping	NM_138387	G6PC3	glucose-6-phosphatase 3	+	42148097	42153712	123.95	54.371	7.05609	5.58826	126.326	128.042	117.481	33.6331	57.0234	63.7821	63.0455	7.07253	7.09023	7.00551	5.7842	5.90828	4.89381	5.76678
ASHG19A3A013898	1.06122e-05	5.61261	up	noncoding	uc002snv.3	BC024248	UCSC_knowngene	1179	chr2	-	78639672	78769187	GGCAATCCTGATTTAAAACTAAGACTGGCTTGTGGTTAAATGAATGTGTTCAGTTTTTGA	intergenic							30456	4342.4	14.6794	12.1907	28975.3	33769.2	28623.5	4175.08	4280.97	4424.12	4489.41	14.5767	14.8208	14.6408	12.1831	12.2341	12.1419	12.2038
ASHG19A3A033711	0.00722044	2.30264	up	noncoding	ENST00000437833	RP11-122G18.5	Ensembl	1806	chr1	+	161337811	161341754	GCTTCAGTTGCCTTAACTAGTTGCCTTGGCATCATTAATAAGTTTTCTTTTCCTCTACTG	bidirectional	NM_001013625	C1orf192	hypothetical protein LOC257177	-	161334520	161337664	342.867	156.737	8.42272	7.21943	370.907	382.232	275.462	177.835	151.678	153.463	143.971	8.53575	8.5686	8.16382	7.03085	7.21687	7.40017	7.22984
ASHG19A3A037865	0.00078934	3.39497	up	noncoding	ENST00000449233	RP11-380I20.2	Ensembl	177	chr9	-	110616063	110616539	ATGAAAAAGCAGAGTGACTTGGTTAAGGGGAAAGCACCAAGATGATGGGCTTTCTGTTGC	intergenic							1661.33	448.279	10.5686	8.80518	1712.23	1728.41	1543.35	429.573	452.923	530.029	380.59	10.5898	10.6066	10.5093	8.50009	9.09287	8.74282	8.88494
ASHG19A3A011797	0.0110174	2.75063	up	noncoding	NR_003578	ZNF702P	RefSeq_NR	3015	chr19	-	53471504	53496784	TCCAAAAACTCCTGTTACATGAGGAAGACACCAAGAAGAGCAAAGAAAAGGAGCCAGGGT	intergenic							41.8875	20.7461	5.56294	4.10318	44.7395	40.4398	40.4831	21.2855	25.4365	11.9334	24.329	5.62583	5.52351	5.53949	4.33848	3.33197	4.19522	4.54706
ASHG19A3L0002225	5.37487e-05	2.69876	up	noncoding	BC036853	lincRNA-PDCD1LG2-2	lincRNA	1660	chr9	-	5357968	5630071	GGAGGTGCTCTAAATAACTTTTAGATTTCCTCTCTCTGTGTGCATTACCAATATCTAAGT	exon sense-overlapping	NM_018465	C9orf46	transmembrane protein C9orf46	-	5357966	5437937	34709.6	10086.3	14.87	13.4377	34039.9	37670.6	32418.2	9515.4	9974.34	10194.6	10660.8	14.8027	14.9871	14.8201	13.4545	13.4635	13.3719	13.4609
ASHG19A3L0002225	5.37487e-05	2.69876	up	noncoding	BC036853	lincRNA-PDCD1LG2-2	lincRNA	1660	chr9	-	5357968	5630071	GGAGGTGCTCTAAATAACTTTTAGATTTCCTCTCTCTGTGTGCATTACCAATATCTAAGT	intronic antisense	NM_025239	PDCD1LG2	programmed cell death 1 ligand 2 precursor	+	5510544	5571282	34709.6	10086.3	14.87	13.4377	34039.9	37670.6	32418.2	9515.4	9974.34	10194.6	10660.8	14.8027	14.9871	14.8201	13.4545	13.4635	13.3719	13.4609
ASHG19A3L0002225	5.37487e-05	2.69876	up	noncoding	BC036853	lincRNA-PDCD1LG2-2	lincRNA	1660	chr9	-	5357968	5630071	GGAGGTGCTCTAAATAACTTTTAGATTTCCTCTCTCTGTGTGCATTACCAATATCTAAGT	intronic antisense	NM_001135920	KIAA1432	protein RIC1 homolog isoform b	+	5629118	5769454	34709.6	10086.3	14.87	13.4377	34039.9	37670.6	32418.2	9515.4	9974.34	10194.6	10660.8	14.8027	14.9871	14.8201	13.4545	13.4635	13.3719	13.4609
ASHG19A3L0002225	5.37487e-05	2.69876	up	noncoding	BC036853	lincRNA-PDCD1LG2-2	lincRNA	1660	chr9	-	5357968	5630071	GGAGGTGCTCTAAATAACTTTTAGATTTCCTCTCTCTGTGTGCATTACCAATATCTAAGT	intronic antisense	NM_001206557	KIAA1432	protein RIC1 homolog isoform c	+	5629118	5776556	34709.6	10086.3	14.87	13.4377	34039.9	37670.6	32418.2	9515.4	9974.34	10194.6	10660.8	14.8027	14.9871	14.8201	13.4545	13.4635	13.3719	13.4609
ASHG19A3L0002225	5.37487e-05	2.69876	up	noncoding	BC036853	lincRNA-PDCD1LG2-2	lincRNA	1660	chr9	-	5357968	5630071	GGAGGTGCTCTAAATAACTTTTAGATTTCCTCTCTCTGTGTGCATTACCAATATCTAAGT	intronic antisense	NM_020829	KIAA1432	protein RIC1 homolog isoform a	+	5629118	5776556	34709.6	10086.3	14.87	13.4377	34039.9	37670.6	32418.2	9515.4	9974.34	10194.6	10660.8	14.8027	14.9871	14.8201	13.4545	13.4635	13.3719	13.4609
ASHG19A3L0002225	5.37487e-05	2.69876	up	noncoding	BC036853	lincRNA-PDCD1LG2-2	lincRNA	1660	chr9	-	5357968	5630071	GGAGGTGCTCTAAATAACTTTTAGATTTCCTCTCTCTGTGTGCATTACCAATATCTAAGT	intronic antisense	NM_014143	CD274	programmed cell death 1 ligand 1 precursor	+	5450502	5470567	34709.6	10086.3	14.87	13.4377	34039.9	37670.6	32418.2	9515.4	9974.34	10194.6	10660.8	14.8027	14.9871	14.8201	13.4545	13.4635	13.3719	13.4609
ASHG19A3A026163	0.000596694	2.34421	up	noncoding	BC034819		NRED	2882	chr4	+	153457444	153460292	GTGGCTTTTACTGTCAAAGATTGTGTAAGCTAAATTATCTGGCAAAATTTTGCTTTCCAG	intergenic							961.219	387.651	9.81522	8.58612	935.894	1097.56	850.2	384.976	354.63	375.031	435.969	9.76947	9.97993	9.69627	8.70542	8.5598	8.57315	8.5061
ASHG19A3A033960	0.000236662	2.25318	up	noncoding	ENST00000434621	GAPDHL13	Ensembl	1008	chr7	+	9654607	9655615	CATTTCCTGATATGACAATGAATTTGGCTACAGCAACAGGGTGGTGAACCTCATGACCCA	intergenic							106421	36106.1	16.4512	15.2792	129872	79597.3	109792	40657.5	38365.5	25297.9	40103.6	16.7001	16.0772	16.5762	15.402	14.7912	15.5243	15.3994
ASHG19A3A036744	0.000538231	7.40276	up	noncoding	ENST00000509499	RP11-69I13.1	Ensembl	856	chr8	+	89497338	89498323	CCCAGTGCCTAATGAAAATAGATACATTCCTGATTGGGTACCAGTATAGAAAAACAACAA	intergenic							122.613	20.8712	7.04068	4.15262	129.314	114.675	123.851	23.5769	14.1777	22.0317	23.6984	7.10495	6.93573	7.08136	4.29586	4.31113	4.35442	3.64908
ASHG19A3L0001219	0.00363817	3.50979	up	noncoding	BX101700	lincRNA-TACR1-1	lincRNA	720	chr2	-	75555040	75555760	AAATGAATAGCTGATACTCCTCCTTCATCAGAGAACTTGTGAGGCAGAAAGCGGGGAAAG	intergenic							122.034	41.8079	7.02448	5.2131	138.214	125.688	102.2	50.2845	32.0891	49.2731	35.585	7.19501	7.06299	6.81545	4.92357	5.52279	5.50546	4.90057
ASHG19A3A008281	0.0233343	2.4643	up	noncoding	ENST00000426038	RP11-357J22.2	Ensembl	703	chr1	-	176336834	176337537	TTTTTCAACTTCATATAGTGCCAACAATTATGAGTGTGGTTCCTCCTGAGTATCATCATT	intergenic							120.948	60.63	7.02236	5.72118	128.382	122.001	112.46	95.0719	46.8772	58.4326	42.1383	7.09496	7.02321	6.94892	5.17901	5.77349	6.46248	5.46975
ASHG19A3A008475	0.000956915	2.02708	up	noncoding	uc010wkl.1	DQ589083	UCSC_knowngene	1661	chr17	-	45126240	45127901	AACTCTGCTTAGGATTATTTCATTGATCCCCAGGGTCCAATTGCCCAGTGCTCAGTCAAA	intergenic							3276.67	1372.45	11.5363	10.5169	3516.13	3351.18	2962.69	1432.42	1349.82	1379.81	1327.75	11.6127	11.5571	11.4392	10.415	10.5373	10.5861	10.5293
ASHG19A3A051348	0.00797854	3.14624	up	noncoding	ENST00000475149	RP11-114O13.1	Ensembl	392	chr14	+	31260303	31260695	ATAGATATGGCATCGATCTTTAGCCTGAGAACTCTCCAGAAATGTTAACGAGATCCTGGG	intergenic							359.877	129.122	8.50537	6.85175	366.429	357.685	355.517	205.648	112.641	101.341	96.8598	8.52012	8.47834	8.51766	6.42161	6.5897	7.61408	6.78159
ASHG19A3A011827	0.00122823	2.27562	up	noncoding	BC020462		misc_RNA	715	chr19	-	54705040	54711515	TCGATGTGCTTCTGGGAATCCAGGCGGACAATGAAGGACGGGATGTTCACCACCTGCTTG	natural antisense	NM_001013	RPS9	40S ribosomal protein S9	+	54704725	54711515	82.1687	43.8188	6.49344	5.30718	87.4585	79.5102	79.5374	47.2926	46.9275	40.3677	40.6874	6.57129	6.43453	6.4745	5.12689	5.22166	5.40925	5.47092
ASHG19A3A024508	0.00135439	2.15823	up	noncoding	ENST00000507207	RP11-1299A16.1	Ensembl	168	chr4	-	99634954	99635122	AAGAAGGGTATAGAGCCTGGGATGTCTGAACCAATCGTTTTGAGCCTGCTTTGGAGATAA	intergenic							322.56	159.21	8.34803	7.23818	361.505	280.604	325.569	187.29	148.633	144.977	155.939	8.5022	8.14706	8.39483	7.14873	7.12825	7.47624	7.19949
ASHG19A3A024990	0.000197406	2.31169	up	noncoding	ENST00000513791	RP11-485C11.1	Ensembl	460	chr4	-	173301178	173301638	ATCCATTAGCAAATGATGCAGAGGAGCAGTGGAAACACCAACGAAGCCCAAGCCATATAA	intronic antisense	NM_001034845	GALNTL6	polypeptide	+	172734574	173961558	1106.67	444.404	10.0099	8.80098	1155.12	1099.22	1065.68	403.76	451.559	453.05	469.247	10.0506	9.98154	9.99765	8.81993	8.85575	8.64895	8.87929
ASHG19A3A035243	0.00837427	2.82494	up	noncoding	ENST00000291129	AC099548.6	Ensembl	2421	chr7	+	143497824	143515066	AACTTGGAAAAGAGCTGTCTGGCAAAGTTGAGAGTTGATGGTGCAGCCTTCCTACAGATT	intergenic							82.8274	36.8494	6.49107	4.99285	97.0042	65.461	86.0169	23.5326	46.3691	31.9346	45.5613	6.71731	6.17071	6.58519	5.29403	4.87165	4.35184	5.45387
ASHG19A3A037858	4.19872e-05	13.4267	up	noncoding	ENST00000415694	RP11-417L14.1	Ensembl	1580	chr9	-	109931849	109933429	AGCTTAATTAAGTATTTCTCTGTAGAGGAAGAGGAAGATGAAAACATGGTGCCAGAAACT	intergenic							264.035	23.171	8.07363	4.3266	279.263	244.98	267.861	24.2759	19.3827	19.4767	29.5487	8.1368	7.96378	8.12031	4.63793	4.1194	4.39916	4.1499
ASHG19A3A014203	0.00888553	2.63529	up	noncoding	NR_015395	LOC541471	RefSeq_NR	809	chr2	-	112124590	112252692	TTATAAATCTTCAATACATCCTGTCCCCCTAAAACGGCATCTGGGTCTTTTGAGGGTTAA	intergenic							1479.19	530.441	10.4085	9.01057	1553.31	1418.42	1465.85	384.213	624.352	385.229	727.969	10.4555	10.3368	10.4334	9.49448	8.60129	8.57004	9.37648
ASHG19A3A008205	0.00205082	2.9321	up	noncoding	uc010ctx.1	AK125932	UCSC_knowngene	4399	chr17	-	34220710	34236953	TAAATACCCCTGGAAATGATGAACTTCCGCCAAATCTATCAAGAGCCCATGACTCCATCT	intergenic							88.2768	36.9016	6.58643	5.03449	99.3095	89.0413	76.4796	31.4765	42.5407	30.3798	43.2094	6.7517	6.59267	6.41491	5.21761	4.79851	4.79976	5.3221
ASHG19A3A035844	0.0355595	2.16852	up	noncoding	ENST00000489168	RP11-159C14.1	Ensembl	390	chr8	-	69437751	69438141	TATCATCCTGTTTCTCACTGTGATGAAGCATGGCTACACTGGTGAATCTAAAATCATTGA	intronic antisense	NM_001195639	C8orf34	hypothetical protein LOC116328 isoform 2	+	69242956	69448062	348.763	182.566	8.45804	7.34133	364.506	312.467	369.316	116.419	243.253	113.296	257.295	8.5112	8.29028	8.57265	7.91341	6.75294	6.75041	7.94857
ASHG19A3A035844	0.0355595	2.16852	up	noncoding	ENST00000489168	RP11-159C14.1	Ensembl	390	chr8	-	69437751	69438141	TATCATCCTGTTTCTCACTGTGATGAAGCATGGCTACACTGGTGAATCTAAAATCATTGA	intronic antisense	NM_052958	C8orf34	hypothetical protein LOC116328 isoform 1	+	69242956	69731258	348.763	182.566	8.45804	7.34133	364.506	312.467	369.316	116.419	243.253	113.296	257.295	8.5112	8.29028	8.57265	7.91341	6.75294	6.75041	7.94857
ASHG19A3A050568	3.53106e-05	7.27172	up	noncoding	uc001vzu.1	AK092333	UCSC_knowngene	4275	chr14	-	21668239	21672514	GTAATCAGTAATCTCATGCCAAGGATGAGAGAGGGGCATTATCCAAAAAGTTGGGTGTGT	intergenic							130.381	22.0422	7.12567	4.26337	135.474	130.039	125.63	22.4904	22.5808	18.6069	24.4908	7.16869	7.11062	7.0977	4.34964	4.04938	4.28178	4.37268
ASHG19A3A007732	0.000590162	2.3098	up	noncoding	NR_033195	ZFAND1	RefSeq_NR	2148	chr8	-	82613567	82633539	AGTTGGACATCGGGCAGCACTGCCAGATTTTCTTCCATTTGTGTGTGATGATTGTTCAGG	exon sense-overlapping	NM_001170797	ZFAND1	AN1-type zinc finger protein 1 isoform c	-	82615148	82633539	197.152	95.414	7.67992	6.47215	176.929	226.472	188.056	88.5374	97.9441	94.6256	100.549	7.53153	7.8592	7.64903	6.47534	6.48761	6.358	6.56767
ASHG19A3A007732	0.000590162	2.3098	up	noncoding	NR_033195	ZFAND1	RefSeq_NR	2148	chr8	-	82613567	82633539	AGTTGGACATCGGGCAGCACTGCCAGATTTTCTTCCATTTGTGTGTGATGATTGTTCAGG	exon sense-overlapping	NM_024699	ZFAND1	AN1-type zinc finger protein 1 isoform a	-	82613565	82633539	197.152	95.414	7.67992	6.47215	176.929	226.472	188.056	88.5374	97.9441	94.6256	100.549	7.53153	7.8592	7.64903	6.47534	6.48761	6.358	6.56767
ASHG19A3A007732	0.000590162	2.3098	up	noncoding	NR_033195	ZFAND1	RefSeq_NR	2148	chr8	-	82613567	82633539	AGTTGGACATCGGGCAGCACTGCCAGATTTTCTTCCATTTGTGTGTGATGATTGTTCAGG	exon sense-overlapping	NM_001170796	ZFAND1	AN1-type zinc finger protein 1 isoform b	-	82613565	82633539	197.152	95.414	7.67992	6.47215	176.929	226.472	188.056	88.5374	97.9441	94.6256	100.549	7.53153	7.8592	7.64903	6.47534	6.48761	6.358	6.56767
ASHG19A3A048268	0.00720044	2.78702	up	noncoding	uc001qoa.2	SRP14P1	UCSC_knowngene	331	chr12	+	6547666	6547997	TATTCAAACCTACTGAGAGCTAACATGGACGGGCTGAGAAGAGGGACAAAAAGAGCAAAA	intergenic							195.801	79.0087	7.59872	6.11999	287.51	129.655	170.238	70.7091	106.266	45.4679	93.5922	8.17875	7.10528	7.51212	6.37044	5.40236	6.01465	6.69253
ASHG19A3A014963	0.0122473	2.82222	up	noncoding	uc001amm.2	C1orf211	UCSC_knowngene	1248	chr1	+	6297870	6299490	AAAGGAGAGGAAGCAGATCTAAGCACACATGGGCATCAAACCAGAGGAACAAAGTCACAT	intergenic							33.6872	16.7416	5.25214	3.75531	40.8121	31.3309	28.9187	9.90962	20.8235	13.3715	22.8617	5.49346	5.18619	5.07676	4.23784	3.51416	3.01352	4.2557
ASHG19A3A028385	0.00600871	2.10187	up	noncoding	ENST00000511688	CTD-2060C23.1	Ensembl	1107	chr5	+	74094818	74095925	TCGATGGAGAGCCATGACAATTTGGGATTTCAAGGATAATTTGAAGCTGAGTGAGCCTCC	intronic antisense	NM_015566	FAM169A	hypothetical protein LOC26049	-	74073398	74162615	1908.17	816.491	10.7777	9.70604	2030.05	1916.93	1777.53	582.69	867.587	899.092	916.594	10.848	10.769	10.7162	9.85371	9.88685	9.21631	9.86729
ASHG19A3A029557	0.0126156	2.34909	up	noncoding	NR_024553	ZNF204P	RefSeq_NR	2909	chr6	-	27325601	27343153	CTTGAACGTGGGGCCAAGACATCAAGAGTAGAGCAGCAGGACATTTCAAAAGAAGATTAA	intergenic							24.7266	14.8716	4.83833	3.60623	28.0876	22.0634	24.029	9.16573	15.7265	15.3968	19.1972	4.97439	4.72657	4.81404	3.95815	3.74474	2.90393	3.81812
ASHG19A3A009247	0.0104338	2.30649	up	noncoding	NR_023380	CCDC144C	RefSeq_NR	4204	chr17	+	20224486	20305504	TTCTCTCAGGGAATGATACTCTCCATGACCTGTGCCAATCACAGCTACCAGAAAACAAAG	intergenic							47.0827	26.1377	5.71956	4.51387	53.2273	40.6477	47.373	23.144	29.6928	29.6928	22.021	5.87283	5.53037	5.75548	4.17958	4.76313	4.32701	4.78574
ASHG19A3A029342	0.000293587	2.17168	up	noncoding	uc001ejz.1	AF379632	UCSC_knowngene	969	chr1	+	144162000	144167711	ATAGATGTTATTCGACTCCTTCAGGTTATCTTGAACTGCCTGACTTAGGCCAGCCCTACA	intergenic							3172.1	1256.17	11.4968	10.378	3335.28	3169.18	3011.83	1108.01	1262.52	1311.71	1342.43	11.5473	11.4777	11.4654	10.4316	10.4603	10.1957	10.4244
ASHG19A3A031631	0.000364266	3.25052	up	noncoding	AL049354		NRED	1275	chr6	+	52532698	52533951	ACTTCACAGAAATGGAAGGTAACCTCTTTAGACGTGTGCCTGCAAGATGGCTGTCATTGT	intergenic							6840.31	1767.76	12.5731	10.8724	6808.89	7281.24	6430.8	1690.63	1861.69	1560.77	1957.97	12.5438	12.6539	12.5215	10.9722	10.7091	10.8198	10.9885
ASHG19A3A031608	0.000223079	3.0096	up	noncoding	ENST00000402892	RP1-142O9.2	Ensembl	195	chr6	+	49241240	49241435	AGTCCTACCTCAGATTCTGCATCTGTACAGAGAGCAGACACCAGCTTAAATGACTGTGAA	intergenic							2766.99	802.052	11.295	9.70543	2601.45	3185.68	2513.85	814.022	751.191	793.899	849.097	11.1934	11.4852	11.2064	9.73144	9.70677	9.73127	9.65224
ASHG19A3L0001531	0.000471954	5.41081	up	noncoding	DN920247	lincRNA-SCARB2	lincRNA	527	chr4	-	77102106	77155656	GCCTATGTTTTTGAACAAGACCAATCTGTTGGAGACCCTAAAATTGACTTAAATAGAACA	exon sense-overlapping	NM_001204255	SCARB2	lysosome membrane protein 2 isoform 2	-	77079891	77135052	1358.41	240.888	10.2904	7.85452	1275.03	1523.06	1277.14	181.956	234.7	258.938	287.957	10.188	10.4382	10.2449	8.08364	8.00739	7.43677	7.89029
ASHG19A3L0001531	0.000471954	5.41081	up	noncoding	DN920247	lincRNA-SCARB2	lincRNA	527	chr4	-	77102106	77155656	GCCTATGTTTTTGAACAAGACCAATCTGTTGGAGACCCTAAAATTGACTTAAATAGAACA	exon sense-overlapping	NM_005506	SCARB2	lysosome membrane protein 2 isoform 1	-	77079891	77135052	1358.41	240.888	10.2904	7.85452	1275.03	1523.06	1277.14	181.956	234.7	258.938	287.957	10.188	10.4382	10.2449	8.08364	8.00739	7.43677	7.89029
ASHG19A3A031937	0.000336627	2.01597	up	noncoding	AK054575		misc_RNA	1830	chr6	+	111217337	111219955	CCCAGACAATAGATTTTAGATTTGTAAACATCTTAATATGGAGGGTTTTGTGTGTGTGTG	intergenic							145.602	82.4579	7.26859	6.25712	139.004	167.194	130.607	80.627	78.9978	84.1397	86.0671	7.20401	7.44756	7.15421	6.2479	6.31013	6.2183	6.25213
ASHG19A3A044384	3.65971e-05	2.78901	up	noncoding	ENST00000453578	RP11-316M21.5	Ensembl	825	chr10	+	102008027	102008852	TGAGATCCTCAAGTCAGTGGTGGCTCACTTTGATGCTGGAGAACTAATCACCTAAAGAGA	intronic antisense	NM_018294	CWF19L1	CWF19-like protein 1	-	101992054	102027437	13368.9	3896.6	13.5123	12.0326	14140.2	13590.9	12375.7	3762.29	3902.62	3907.8	4013.68	13.5573	13.5321	13.4476	12.0132	12.0483	11.9856	12.0833
ASHG19A3A016770	3.237e-05	7.07837	up	noncoding	uc010fsr.1	AK096649	UCSC_knowngene	2600	chr2	+	200323330	200325930	CTTCCGATTTAAAGGAGAGTTCTAGGAAGTTTTGTGATCTATGTCCGGTGTGGGTTTTTG	natural antisense	NM_001172517	SATB2	DNA-binding protein SATB2	-	200134222	200329831	917.812	129.96	9.76008	6.93667	1000.3	924.718	828.421	134.536	125.152	129.808	130.343	9.86453	9.75429	9.66143	6.87067	6.96193	6.97311	6.94096
ASHG19A3A016770	3.237e-05	7.07837	up	noncoding	uc010fsr.1	AK096649	UCSC_knowngene	2600	chr2	+	200323330	200325930	CTTCCGATTTAAAGGAGAGTTCTAGGAAGTTTTGTGATCTATGTCCGGTGTGGGTTTTTG	natural antisense	NM_015265	SATB2	DNA-binding protein SATB2	-	200134222	200335989	917.812	129.96	9.76008	6.93667	1000.3	924.718	828.421	134.536	125.152	129.808	130.343	9.86453	9.75429	9.66143	6.87067	6.96193	6.97311	6.94096
ASHG19A3A016770	3.237e-05	7.07837	up	noncoding	uc010fsr.1	AK096649	UCSC_knowngene	2600	chr2	+	200323330	200325930	CTTCCGATTTAAAGGAGAGTTCTAGGAAGTTTTGTGATCTATGTCCGGTGTGGGTTTTTG	bidirectional	NM_001172509	SATB2	DNA-binding protein SATB2	-	200134222	200322819	917.812	129.96	9.76008	6.93667	1000.3	924.718	828.421	134.536	125.152	129.808	130.343	9.86453	9.75429	9.66143	6.87067	6.96193	6.97311	6.94096
ASHG19A3A023158	0.0245609	2.31942	up	noncoding	ENST00000485218	RP11-525K18.2	Ensembl	588	chr3	+	127794652	127797899	GAAAAAATAGGAGGAAAATTAAAATAATCCCACCTTCCTACCTATCCAGAACCATCTCCC	intergenic							406.704	194.241	8.6721	7.45833	414.428	403.864	401.82	320.688	156.345	163.375	136.557	8.68516	8.64555	8.68557	6.94881	7.3112	8.29642	7.27689
ASHG19A3A012619	0.00186031	3.10772	up	noncoding	ENST00000504080	AC016590.1	Ensembl	2659	chr19	+	37816411	37820601	GTGACGTGCCTTTTTGTCTTGGTTGGGTATTTATTTGCAATACAAGAATGATTGTTTTCT	intergenic							394.695	136.768	8.63105	6.99519	422.949	393.798	367.337	177.83	117.527	123.077	128.637	8.71546	8.61148	8.56621	6.85138	6.88378	7.39996	6.84563
ASHG19A3A034572	8.78434e-05	10.4929	up	noncoding	ENST00000403118	AC005102.1	Ensembl	479	chr7	+	75464980	75465459	AGATTGATACATAACAGACACCTGCACAGAGCGTAAACAGAGGTGGCATGACTAGAAACC	intergenic							490.859	50.7118	8.91553	5.52419	511.338	483.631	477.609	43.8894	56.3337	54.0803	48.5439	8.95752	8.8834	8.90568	5.39017	5.66281	5.29721	5.74657
ASHG19A3A010639	0.000225407	3.06611	up	noncoding	ENST00000432117	AC037473.1	Ensembl	741	chr18	+	45156482	45157223	CCTGGGAAAGAAGTTTCAATATCTCCTGTGTGTCTTTCTTACGATCCAACTAAACATCCA	intergenic							822.225	262.147	9.6142	7.99779	846.852	827.343	792.48	229.93	255.817	254.81	308.03	9.63144	9.61076	9.60041	8.18456	7.9827	7.79072	8.03319
ASHG19A3A025664	0.00166378	4.17594	up	noncoding	ENST00000430198	HMGA1L2	Ensembl	324	chr4	+	73964538	73964862	CCGGAAAACCACCACAACTCCAGGAAGGAAACCAAGGGGCAGACCCAAAAAACTGGAGAA	intronic antisense	NM_032217	ANKRD17	ankyrin repeat domain-containing protein 17	-	73940501	74124502	192.248	53.7904	7.6521	5.59	209.039	188.48	179.224	42.4266	70.9837	47.4259	54.3255	7.75836	7.61188	7.58606	5.55971	5.46654	5.24305	6.09068
ASHG19A3A025664	0.00166378	4.17594	up	noncoding	ENST00000430198	HMGA1L2	Ensembl	324	chr4	+	73964538	73964862	CCGGAAAACCACCACAACTCCAGGAAGGAAACCAAGGGGCAGACCCAAAAAACTGGAGAA	intronic antisense	NM_198889	ANKRD17	ankyrin repeat domain-containing protein 17	-	73940501	74124502	192.248	53.7904	7.6521	5.59	209.039	188.48	179.224	42.4266	70.9837	47.4259	54.3255	7.75836	7.61188	7.58606	5.55971	5.46654	5.24305	6.09068
ASHG19A3A025723	0.00111765	2.44077	up	noncoding	uc010ijm.1	AK094144	UCSC_knowngene	3134	chr4	+	79834383	79837517	AACTTCAGTCCTCAAATATAGCTGGGAAACAATTATGAGATAGACTCAGTCTCCCCCTCC	intergenic							14213	4731.8	13.5916	12.3043	13556.2	16836.6	12246.1	3885.64	4800.61	4957.37	5283.57	13.5119	13.8309	13.4321	12.4175	12.3908	12.0323	12.3765
ASHG19A3A032017	0.000810109	4.8091	up	noncoding	ENST00000392497	AL139098.3	Ensembl	249	chr6	+	121729687	121729940	AAAGCTGATTCTGGCAAGGAGGGGAATAACCTTCCAGAAAATGCAGATGCCAAAACAGAC	intergenic							634.667	136.217	9.2601	6.99433	680.113	610.999	612.89	110.444	146.16	161.125	127.138	9.34128	9.19465	9.24438	6.83392	7.29153	6.67751	7.17438
ASHG19A3A033232	0.00229086	5.18061	up	noncoding	ENST00000455459	GS1-259H13.7	Ensembl	526	chr7	-	99235864	99236390	AGTGACTTACAAAAATGTCAAGTTCAACATATGGGATGTGGGTGGCCAGGACAAGATCCG	intergenic							118.203	28.9002	6.99255	4.61943	122.101	111.914	120.593	43.1687	20.1822	28.4397	23.81	7.02799	6.90583	7.04383	4.3038	4.69793	5.26684	4.20912
ASHG19A3A023231	0.00311161	3.1677	up	noncoding	uc001czn.2	BC042048	UCSC_knowngene	526	chr1	+	60238466	60254499	CACCCAAGATGTCCGGCTGAAGTTCTTAACCATTACCTTACACTAATCAACAGCAACAAT	intergenic							195.413	70.6445	7.67641	6.01298	200.828	207.213	178.198	83.0758	75.6309	69.0633	54.808	7.70752	7.74435	7.57737	5.57405	6.02735	6.26243	6.18806
ASHG19A3A052171	0.000473603	6.58763	up	noncoding	uc002ade.1	AK055370	UCSC_knowngene	3748	chr15	-	55831081	55834829	GTTGTTTATCAGTATATAGACCTACCATTAGTAGAAATGATGTATGGCAGGCTTTCTTGA	intergenic							2521.72	358.919	11.1671	8.44739	2670.41	2529.43	2365.33	254.065	391.357	395.566	394.688	11.2236	11.1576	11.1202	8.55309	8.64166	7.94125	8.65354
ASHG19A3A009606	0.000642849	3.01272	up	noncoding	ENST00000514828	AC091132.1	Ensembl	429	chr17	+	43594141	43594671	ATGCCAAGATGAGTTTGTCAGTATAGCCGTATCCTGGAACTTCTTTTGTGAGCTAAAAAA	intergenic							3361.73	970.278	11.5732	9.98209	3586.69	3348.61	3149.88	1017.21	1018.51	779.116	1066.28	11.6405	11.5561	11.5229	10.0789	9.67611	10.0621	10.1112
ASHG19A3A020110	2.01346e-05	4.67803	up	noncoding	ENST00000438948	XXbac-B444P24.10	Ensembl	1240	chr22	+	20287282	20300739	AAGTGTCGCAAAGATGGGCATCGCATCCAGGGCTGAGATTGAGGACTGGTTCACGGCAGA	intergenic							46.3289	13.4161	5.70308	3.47718	45.5841	47.9893	45.4133	14.1513	12.8123	13.843	12.8579	5.65509	5.75467	5.69949	3.29747	3.56911	3.5564	3.48574
ASHG19A3A049938	0.000784277	5.26278	up	noncoding	ENST00000445646	RP11-363G2.4	Ensembl	533	chr13	+	23426134	23426991	TGGTGTTGGGGGCAATAGGTTTGTGAATATTCTGTGGATATGTCCATGCATAGGTGTATA	intergenic							272.191	57.9822	8.11399	5.71816	309.561	249.321	257.69	67.3475	52.55	61.8947	50.1364	8.28577	7.98738	8.06882	5.43785	5.85921	5.93744	5.63814
ASHG19A3A020928	0.000543666	3.72371	up	noncoding	ENST00000434712	RP11-193I22.2	Ensembl	514	chr3	-	42092672	42093186	AGCTATCAGGATCTACAACAATGACAGATATGATGAGATCTGCACTGCTGGGGAGGCAAT	intergenic							4845.06	1113.45	12.0923	10.1955	5315.21	4371.37	4848.59	1232.61	1082.01	1145.49	993.688	12.2032	11.9441	12.1295	9.97333	10.2619	10.3544	10.1925
ASHG19A3A010126	0.0043462	2.14077	up	noncoding	ENST00000400144	AP005380.2	Ensembl	366	chr18	-	5132780	5133150	TTATTTCTCAGACAGTGGATCCAAAATTAAACCACATCCTCAGGCCACCAGTGGAAGGAG	intergenic							73.8506	43.0123	6.3434	5.24527	81.9606	65.6235	73.9678	35.0268	47.8325	32.5483	56.6417	6.48439	6.17488	6.37093	5.62466	4.89944	4.95709	5.49988
ASHG19A3A032717	0.00019002	2.62219	up	noncoding	uc003thg.2	CR606158	UCSC_knowngene	1572	chr7	-	39893287	39894859	GAACAGTCACTCCATAGTGCAATCCATATTAATAGCCTTCTTATCTTAAGTCTTCATCTC	intergenic							1841.97	627.303	10.7223	9.33155	1749.55	2046.24	1730.13	613.341	613.534	615.879	666.458	10.623	10.8689	10.6751	9.3618	9.3225	9.29271	9.34918
ASHG19A3A039003	0.000429234	2.1325	up	noncoding	ENST00000395253	RP11-520B13.7	Ensembl	773	chr9	+	99883940	99884713	AGATAACACTGGGGTTACTGGCTCTGCAACATTTTGAATTAGCAAATTCATTATGCCATA	intergenic							1714.67	710.871	10.6072	9.51463	1682.42	2032.76	1428.84	658.863	634.781	760.334	789.508	10.5625	10.8599	10.3991	9.61432	9.64116	9.40165	9.4014
ASHG19A3A054139	0.00589744	2.33226	up	noncoding	BC111535		RNAdb	593	chr1	-	160057810	160058342	TGTCCATCCATCCACTCATGAACAAATGTGAAGGTCAAACACAGACTGGCATTTTCACCC	natural antisense	NM_004983	KCNJ9	G protein-activated inward rectifier potassium	+	160051359	160059212	196.47	94.4993	7.67403	6.4523	230.316	172.411	186.684	106.885	98.7316	91.4851	80.8959	7.89013	7.49188	7.64008	6.16076	6.43783	6.63072	6.57989
ASHG19A3A043893	0.00941947	2.10726	up	noncoding	ENST00000453605	RP11-292F22.4	Ensembl	159	chr10	+	47556164	47566804	GAGAGAGAAAAAAGTAAAAGAAAAGAAACCCAAAAGGGAAAATATAGCTAAGGTGAACTG	intergenic							54.2805	32.3416	5.89901	4.82364	63.9963	56.8809	41.9641	24.0125	31.1557	42.0062	32.192	6.12745	5.981	5.58858	4.76883	5.28391	4.38307	4.85875
ASHG19A3A025467	0.0289428	3.10492	up	noncoding	ENST00000463499	RP11-49F1.1	Ensembl	571	chr4	+	42473826	42474397	ATAGGAGAACAACATGGAAAGCAAGGCTGAAACTTTTTCTGGTGTCTATAAGCAGCTCAC	intronic antisense	NM_006095	ATP8A1	probable phospholipid-transporting ATPase IA	-	42410391	42659122	1626.75	546.192	10.538	8.90343	1709.28	1391.35	1779.63	362.703	783.063	215.785	823.215	10.5872	10.3091	10.7176	9.68505	7.72908	8.48888	9.71069
ASHG19A3A025467	0.0289428	3.10492	up	noncoding	ENST00000463499	RP11-49F1.1	Ensembl	571	chr4	+	42473826	42474397	ATAGGAGAACAACATGGAAAGCAAGGCTGAAACTTTTTCTGGTGTCTATAAGCAGCTCAC	intronic antisense	NM_001105529	ATP8A1	probable phospholipid-transporting ATPase IA	-	42410391	42659122	1626.75	546.192	10.538	8.90343	1709.28	1391.35	1779.63	362.703	783.063	215.785	823.215	10.5872	10.3091	10.7176	9.68505	7.72908	8.48888	9.71069
ASHG19A3A050787	0.000830402	6.341	up	noncoding	ENST00000416817	AL583842.8	Ensembl	1573	chr1	-	142712909	142729971	CAAACAAAGAAAGGTTGGGAAAACGTATCCTCAGCAATTTCCCAAGAAACTGAAGGAAGA	intergenic							821.15	133.588	9.6076	6.94289	854.014	858.293	751.144	85.4761	137.908	155.293	155.674	9.64092	9.65977	9.52209	7.14695	7.23477	6.30429	7.08553
ASHG19A3A024374	0.000421986	2.38851	up	noncoding	ENST00000470927	RP11-1E1.1	Ensembl	724	chr4	-	78003555	78004279	AAGTTTGGTGTCATTTGCTTGGAAGACCTCATTCATGAAACTGCCTTCCCAGGGAAGCAT	intergenic							2595.66	942.339	11.2045	9.94836	2742.43	2746.55	2297.99	986.061	899.303	923.321	960.671	11.2634	11.271	11.079	9.91849	9.92974	10.0185	9.92667
ASHG19A3A038372	7.32457e-06	2.54467	up	noncoding	ENST00000449745	RP11-284P20.2	Ensembl	1735	chr9	+	13986173	13987908	AAGAAGTGGGAGAAGTACCTGTACCAGAAGATCATGTTTGGCAAGAGGCGAAAAATCCGA	intergenic							3701.16	1242.8	11.7122	10.3648	3935	3625.26	3543.21	1205.77	1229.08	1227.02	1309.31	11.773	11.6659	11.6978	10.3958	10.3625	10.3183	10.3825
ASHG19A3L0001175	0.000333923	2.24541	up	noncoding	CR625452		misc_RNA	1765	chr2	-	240321577	240323342	TAACTTGAGGCAGCTGATATGAGTGTTTTCTTTATTGCATGTTGTAAATTGACCTGCTGT	exon sense-overlapping	NM_006037	HDAC4	histone deacetylase 4	-	239969863	240322643	201.405	100.76	7.71316	6.54618	219.475	186.796	197.946	114.587	91.5707	90.6463	106.237	7.82204	7.60039	7.71704	6.56509	6.42318	6.72858	6.46787
ASHG19A3A032825	0.00699613	4.9003	up	noncoding	ENST00000452941	RP11-339F13.1	Ensembl	448	chr7	-	55327501	55327949	GCAGATATTGATGGAGACAGACAAGTTGATTATGAAGAATTAATACAGATGATGACTGCA	intergenic							138.396	35.9524	7.20759	4.91472	140.616	130.171	144.402	18.193	49.2504	35.1208	41.2453	7.21986	7.11244	7.29046	5.14747	5.01291	3.95723	5.54127
ASHG19A3A010273	0.003544	5.82735	up	noncoding	AK024944		NRED	2357	chr1	-	205578843	205581144	CAATGCAGGTCTCTGTGCAGAAATCTGGGGCTCTAAATGAATTACCAAACCAATAGGAAA	intergenic							169.16	36.6502	7.47804	4.9352	174.14	167.551	165.788	22.878	40.4108	25.4755	57.8365	7.51024	7.45028	7.47361	5.65509	4.53115	4.30925	5.24532
ASHG19A3A034440	2.9735e-05	8.58213	up	noncoding	ENST00000453697	RP11-321E8.1	Ensembl	763	chr7	+	63894207	63894970	AGGTCTTGCTCTCAAATTTTTCTGTATTCTACTACGAAATTCTTAATTCCCCTGACCATG	intergenic							449.27	57.2084	8.80222	5.70089	445.069	470.629	432.111	57.9366	49.3389	54.1123	67.4459	8.78417	8.84697	8.77553	5.88346	5.66366	5.71239	5.54404
ASHG19A3A009662	0.00197026	2.16567	up	noncoding	ENST00000502398	RP11-463M16.5	Ensembl	195	chr17	+	46958483	46958678	AAGTGCAACTGGCCAGCAGTCACACAGCTCCATGACTCCAAGGTTGAGTTCCTGCTGCCT	intergenic							174.627	92.502	7.52171	6.4069	190.733	161.045	172.103	77.6105	94.727	77.2239	120.447	7.63849	7.39986	7.52678	6.75808	6.18849	6.15703	6.524
ASHG19A3A038728	0.000988741	13.9045	up	noncoding	ENST00000456472	RP11-250H24.4	Ensembl	1187	chr9	+	69501017	69502204	GCAACCAGCATTTAGAGCTGTTTTTGAAGCACTCAGAAATTGTTCTTTTAAGATGACAAT	intergenic							156.205	14.8535	7.36607	3.56859	176.179	150.951	141.486	15.4033	6.62573	16.6706	20.7143	7.52491	7.30975	7.26354	4.08028	3.87626	3.69335	2.62446
ASHG19A3A045395	1.77222e-05	3.04123	up	noncoding	ENST00000435986	RP11-183G22.2	Ensembl	653	chr1	-	50864496	50865445	GAAAATCTATATCCCCCCTAAAGGGGAGACAAAAAAGAAGTTCAAGTCCAATGCACCCAA	intergenic							833.103	265.458	9.63037	8.02571	869.38	833.573	796.354	269.144	252.301	271.544	268.842	9.66489	9.62045	9.60576	7.97752	8.08441	8.02959	8.01133
ASHG19A3A051626	3.53501e-05	2.12795	up	noncoding	ENST00000392947	RP5-998N21.8	Ensembl	381	chr1	-	149424564	149424954	CCGGAAGTGCCTTTTTCCAGAAGGTATTTGAAATATCTCACCAAAAAATATTTGAAGAAC	intergenic							21115	7843.28	14.1527	13.0633	21579.5	20843	20922.5	7607.51	7606.75	8113.07	8045.8	14.1426	14.1335	14.182	13.0365	13.1155	13.0351	13.0659
ASHG19A3A040875	0.0330576	2.9023	up	noncoding	ENST00000411879	RP1-154K9.2	Ensembl	895	chrX	+	42111711	42558542	CCTTGGAGCAGAAAGTGAAAGTGTTCTGGAGCCAAAAGTAGTAACAAAGATGGAGGGCAA	intergenic							29.4627	14.4745	5.05503	3.51783	26.5082	23.0105	38.8694	9.79014	10.9341	13.8925	23.2811	4.89967	4.78074	5.48467	4.26926	3.57558	2.9979	3.22859
ASHG19A3A038843	0.0150811	5.30474	up	noncoding	ENST00000422010	RP11-15B24.4	Ensembl	599	chr9	+	85068259	85070140	TCCTTTCCGTGCTGTGCTATCATTGTTCAGGTGCTAAAGTGAAATAAATGTGTCGTCTAA	intergenic							110.967	29.204	6.89353	4.48624	128.242	111.982	92.6785	55.2381	13.4399	25.8831	22.2548	7.09321	6.90717	6.6802	4.1955	4.55497	5.64076	3.55375
ASHG19A3A012451	0.000222037	24.8203	up	noncoding	NR_027130	ZNF738	RefSeq_NR	11734	chr19	+	21541734	21571383	CTGTCCTGAAAAATTTTTGTTGAGAATCCACTGGCTATCTCATAAGAGTATTCTTGCAAA	intergenic							293.278	14.8898	8.21938	3.58593	317.004	285.272	277.557	17.2996	9.4699	12.056	20.7338	8.31879	8.16534	8.17401	4.08167	3.34897	3.87702	3.03608
ASHG19A3A015707	9.23616e-05	2.17842	up	noncoding	ENST00000414975	RP11-681L4.1	Ensembl	361	chr2	+	62083829	62084190	ACTGTGGTTACCTGTATACCTGTTACCACTTTCAAAAATCTAGATAGTCAGTGTGGATGA	intergenic							32065.8	11530.6	14.7608	13.6376	33081.5	31477.1	31638.8	11378.8	10842.8	12007.7	11893	14.7681	14.7248	14.7896	13.6258	13.7062	13.6299	13.5883
ASHG19A3L0002482	0.0293733	2.861	up	noncoding	AI432427	lincRNA-CA6	lincRNA	619	chr1	+	8906748	9229411	AATGGGTGGTGCCGCAGGAGAACTCATCTCAGTGGATTCTGCATTTGAATATGGAATACA	intron sense-overlapping	NM_001215	CA6	carbonic anhydrase 6 precursor	+	9005921	9035148	30.2775	15.0394	5.1011	3.58457	38.3468	26.6382	25.8477	22.8104	15.8149	9.87681	11.6556	5.40931	4.97336	4.92062	3.1551	3.05468	4.30366	3.82485
ASHG19A3L0002482	0.0293733	2.861	up	noncoding	AI432427	lincRNA-CA6	lincRNA	619	chr1	+	8906748	9229411	AATGGGTGGTGCCGCAGGAGAACTCATCTCAGTGGATTCTGCATTTGAATATGGAATACA	intronic antisense	NM_024980	GPR157	probable G-protein coupled receptor 157	-	9164475	9189229	30.2775	15.0394	5.1011	3.58457	38.3468	26.6382	25.8477	22.8104	15.8149	9.87681	11.6556	5.40931	4.97336	4.92062	3.1551	3.05468	4.30366	3.82485
ASHG19A3L0002482	0.0293733	2.861	up	noncoding	AI432427	lincRNA-CA6	lincRNA	619	chr1	+	8906748	9229411	AATGGGTGGTGCCGCAGGAGAACTCATCTCAGTGGATTCTGCATTTGAATATGGAATACA	intronic antisense	NM_207420	SLC2A7	solute carrier family 2, facilitated glucose	-	9063358	9086404	30.2775	15.0394	5.1011	3.58457	38.3468	26.6382	25.8477	22.8104	15.8149	9.87681	11.6556	5.40931	4.97336	4.92062	3.1551	3.05468	4.30366	3.82485
ASHG19A3L0002482	0.0293733	2.861	up	noncoding	AI432427	lincRNA-CA6	lincRNA	619	chr1	+	8906748	9229411	AATGGGTGGTGCCGCAGGAGAACTCATCTCAGTGGATTCTGCATTTGAATATGGAATACA	intronic antisense	NM_001201483	ENO1	c-myc promoter-binding protein-1 isoform MBP-1	-	8921058	8931635	30.2775	15.0394	5.1011	3.58457	38.3468	26.6382	25.8477	22.8104	15.8149	9.87681	11.6556	5.40931	4.97336	4.92062	3.1551	3.05468	4.30366	3.82485
ASHG19A3L0002482	0.0293733	2.861	up	noncoding	AI432427	lincRNA-CA6	lincRNA	619	chr1	+	8906748	9229411	AATGGGTGGTGCCGCAGGAGAACTCATCTCAGTGGATTCTGCATTTGAATATGGAATACA	intronic antisense	NM_001428	ENO1	alpha-enolase isoform 1	-	8921058	8939151	30.2775	15.0394	5.1011	3.58457	38.3468	26.6382	25.8477	22.8104	15.8149	9.87681	11.6556	5.40931	4.97336	4.92062	3.1551	3.05468	4.30366	3.82485
ASHG19A3L0002482	0.0293733	2.861	up	noncoding	AI432427	lincRNA-CA6	lincRNA	619	chr1	+	8906748	9229411	AATGGGTGGTGCCGCAGGAGAACTCATCTCAGTGGATTCTGCATTTGAATATGGAATACA	intronic antisense	NM_001135585	SLC2A5	solute carrier family 2, facilitated glucose	-	9101426	9129887	30.2775	15.0394	5.1011	3.58457	38.3468	26.6382	25.8477	22.8104	15.8149	9.87681	11.6556	5.40931	4.97336	4.92062	3.1551	3.05468	4.30366	3.82485
ASHG19A3L0002482	0.0293733	2.861	up	noncoding	AI432427	lincRNA-CA6	lincRNA	619	chr1	+	8906748	9229411	AATGGGTGGTGCCGCAGGAGAACTCATCTCAGTGGATTCTGCATTTGAATATGGAATACA	intronic antisense	NM_003039	SLC2A5	solute carrier family 2, facilitated glucose	-	9097004	9129887	30.2775	15.0394	5.1011	3.58457	38.3468	26.6382	25.8477	22.8104	15.8149	9.87681	11.6556	5.40931	4.97336	4.92062	3.1551	3.05468	4.30366	3.82485
ASHG19A3A045582	0.000581139	2.00047	up	noncoding	AK094679		misc_RNA	2046	chr11	-	89921092	89923137	TAACATTTTATTTTAAAATATGTACAATGTTTTCTGATTTATTCATTACTGAATCTCAAC	intronic antisense	NM_005467	NAALAD2	N-acetylated-alpha-linked acidic dipeptidase 2	+	89867817	89925779	255.443	138.831	8.03129	7.03095	253.224	268.525	244.581	148.598	115.641	145.047	146.037	8.0115	8.08746	7.99492	7.05208	7.12912	7.1209	6.82172
ASHG19A3A034742	0.00031799	3.02936	up	noncoding	ENST00000429197	AC079781.5	Ensembl	123	chr7	+	97499478	97499601	GCTACGAAGATTGTACACAGAGGTCCAGATACATTCCGTTTTGAGAATGTCAATGGATAC	intronic antisense	NM_183356	ASNS	asparagine synthetase [glutamine-hydrolyzing]	-	97481428	97501854	361.563	128.719	8.51177	6.91276	370.223	371.358	343.109	130.689	120.019	110.997	153.173	8.53314	8.53383	8.46833	7.12424	6.72336	6.92711	6.87632
ASHG19A3A034742	0.00031799	3.02936	up	noncoding	ENST00000429197	AC079781.5	Ensembl	123	chr7	+	97499478	97499601	GCTACGAAGATTGTACACAGAGGTCCAGATACATTCCGTTTTGAGAATGTCAATGGATAC	intronic antisense	NM_133436	ASNS	asparagine synthetase [glutamine-hydrolyzing]	-	97481428	97501477	361.563	128.719	8.51177	6.91276	370.223	371.358	343.109	130.689	120.019	110.997	153.173	8.53314	8.53383	8.46833	7.12424	6.72336	6.92711	6.87632
ASHG19A3A034742	0.00031799	3.02936	up	noncoding	ENST00000429197	AC079781.5	Ensembl	123	chr7	+	97499478	97499601	GCTACGAAGATTGTACACAGAGGTCCAGATACATTCCGTTTTGAGAATGTCAATGGATAC	intronic antisense	NM_001178076	ASNS	asparagine synthetase [glutamine-hydrolyzing]	-	97481428	97501854	361.563	128.719	8.51177	6.91276	370.223	371.358	343.109	130.689	120.019	110.997	153.173	8.53314	8.53383	8.46833	7.12424	6.72336	6.92711	6.87632
ASHG19A3A034742	0.00031799	3.02936	up	noncoding	ENST00000429197	AC079781.5	Ensembl	123	chr7	+	97499478	97499601	GCTACGAAGATTGTACACAGAGGTCCAGATACATTCCGTTTTGAGAATGTCAATGGATAC	intronic antisense	NM_001178077	ASNS	asparagine synthetase [glutamine-hydrolyzing]	-	97481428	97501477	361.563	128.719	8.51177	6.91276	370.223	371.358	343.109	130.689	120.019	110.997	153.173	8.53314	8.53383	8.46833	7.12424	6.72336	6.92711	6.87632
ASHG19A3A034742	0.00031799	3.02936	up	noncoding	ENST00000429197	AC079781.5	Ensembl	123	chr7	+	97499478	97499601	GCTACGAAGATTGTACACAGAGGTCCAGATACATTCCGTTTTGAGAATGTCAATGGATAC	intronic antisense	NM_001673	ASNS	asparagine synthetase [glutamine-hydrolyzing]	-	97481428	97501854	361.563	128.719	8.51177	6.91276	370.223	371.358	343.109	130.689	120.019	110.997	153.173	8.53314	8.53383	8.46833	7.12424	6.72336	6.92711	6.87632
ASHG19A3A034742	0.00031799	3.02936	up	noncoding	ENST00000429197	AC079781.5	Ensembl	123	chr7	+	97499478	97499601	GCTACGAAGATTGTACACAGAGGTCCAGATACATTCCGTTTTGAGAATGTCAATGGATAC	intronic antisense	NM_001178075	ASNS	asparagine synthetase [glutamine-hydrolyzing]	-	97481428	97501854	361.563	128.719	8.51177	6.91276	370.223	371.358	343.109	130.689	120.019	110.997	153.173	8.53314	8.53383	8.46833	7.12424	6.72336	6.92711	6.87632
ASHG19A3A049656	1.09567e-05	4.429	up	noncoding	BC047655		RNAdb	1927	chr13	-	73282505	73284417	GATTGTACAAGCATTCACTCTTTACTAGCATTTTTTGTTTTTCAGACAAGCTGAAGTGGT	exon sense-overlapping	NM_001071775	MZT1	mitotic-spindle organizing protein 1	-	73282494	73301938	687.564	156.903	9.36623	7.21925	741.067	684.649	636.977	154.852	154.763	145.468	172.528	9.44954	9.34809	9.30108	7.2978	7.13335	7.18522	7.26064
ASHG19A3A023584	0.0139187	2.12044	up	noncoding	ENST00000466064	RP11-791G22.2	Ensembl	827	chr3	+	179593163	179599397	TCTTGCTTTCTGATTCCAATTCCAAGTCACAGTGGTTGGATGTTGTTGGTGAAGTGGAAA	natural antisense	NM_016559	PEX5L	PEX5-related protein	-	179518049	179754517	31.191	20.1862	5.15577	4.0714	35.0919	31.128	27.353	24.4112	13.926	15.7815	26.6263	5.29163	5.17647	4.9992	4.47226	3.78673	4.40741	3.61921
ASHG19A3A050819	0.0114374	2.09199	up	noncoding	ENST00000471982	RP11-1085N6.1	Ensembl	321	chr14	-	57150138	57150459	CTAAAAGAATGCTGGCTATGAAGAGATGCAAGCGTTTTGAATGGGGAGGAGGTAAGAAGA	intergenic							589.397	289.969	9.15656	8.09168	602.473	503.845	661.874	251.256	339.493	181.038	388.087	9.18187	8.9362	9.35161	8.52953	7.46627	7.92569	8.44523
ASHG19A3A040096	0.000176652	3.2162	up	noncoding	ENST00000399586	RP11-324B6.1	Ensembl	6081	chrX	-	74960665	74966746	GATAATTCTTCTAGACAAGTTTCTGAGGATGGGAAACCCAAAGGGTTCTCTTCTAATTCT	intergenic							107.526	40.1803	6.862	5.17664	115.198	103.249	104.132	44.2045	40.7076	35.5578	40.2513	6.94849	6.79567	6.84185	5.10783	5.03309	5.30872	5.25694
ASHG19A3A000010	0.00141414	8.81472	up	noncoding	AJ224166		RNAdb	785	chr5	+	138609819	138643217	AGGGATCAGCAAACTTGCTGTAAAGAGCCAGAGTTGTCTGCTGGTTCTCAGCTTGAAGAA	intron sense-overlapping	NM_001194956	MATR3	matrin-3 isoform b	+	138629438	138667366	140.496	20.5746	7.22718	4.08727	144.828	137.452	139.208	12.4045	25.6443	18.1351	26.1148	7.25525	7.18498	7.24131	4.44297	4.00706	3.34006	4.55897
ASHG19A3A000010	0.00141414	8.81472	up	noncoding	AJ224166		RNAdb	785	chr5	+	138609819	138643217	AGGGATCAGCAAACTTGCTGTAAAGAGCCAGAGTTGTCTGCTGGTTCTCAGCTTGAAGAA	exon sense-overlapping	NM_199189	MATR3	matrin-3 isoform a	+	138609440	138667366	140.496	20.5746	7.22718	4.08727	144.828	137.452	139.208	12.4045	25.6443	18.1351	26.1148	7.25525	7.18498	7.24131	4.44297	4.00706	3.34006	4.55897
ASHG19A3A000010	0.00141414	8.81472	up	noncoding	AJ224166		RNAdb	785	chr5	+	138609819	138643217	AGGGATCAGCAAACTTGCTGTAAAGAGCCAGAGTTGTCTGCTGGTTCTCAGCTTGAAGAA	exon sense-overlapping	NM_018834	MATR3	matrin-3 isoform a	+	138629332	138667366	140.496	20.5746	7.22718	4.08727	144.828	137.452	139.208	12.4045	25.6443	18.1351	26.1148	7.25525	7.18498	7.24131	4.44297	4.00706	3.34006	4.55897
ASHG19A3A000010	0.00141414	8.81472	up	noncoding	AJ224166		RNAdb	785	chr5	+	138609819	138643217	AGGGATCAGCAAACTTGCTGTAAAGAGCCAGAGTTGTCTGCTGGTTCTCAGCTTGAAGAA	exon sense-overlapping	NM_001194954	MATR3	matrin-3 isoform a	+	138609440	138667366	140.496	20.5746	7.22718	4.08727	144.828	137.452	139.208	12.4045	25.6443	18.1351	26.1148	7.25525	7.18498	7.24131	4.44297	4.00706	3.34006	4.55897
ASHG19A3A000010	0.00141414	8.81472	up	noncoding	AJ224166		RNAdb	785	chr5	+	138609819	138643217	AGGGATCAGCAAACTTGCTGTAAAGAGCCAGAGTTGTCTGCTGGTTCTCAGCTTGAAGAA	exon sense-overlapping	NM_001194955	MATR3	matrin-3 isoform a	+	138629438	138667366	140.496	20.5746	7.22718	4.08727	144.828	137.452	139.208	12.4045	25.6443	18.1351	26.1148	7.25525	7.18498	7.24131	4.44297	4.00706	3.34006	4.55897
ASHG19A3A015577	0.00552612	2.89586	up	noncoding	NR_027251	LOC100129726	RefSeq_NR	1698	chr2	+	43454349	43455994	GGACATGCTTGTGTACAGAGTACCTGCTAGTATAAAATGTCTAATGTAGCTGCTTTTATT	bidirectional	NM_006887	ZFP36L2	zinc finger protein 36, C3H1 type-like 2	-	43449540	43453745	49.2221	22.4359	5.78715	4.25316	49.521	47.3068	50.8385	27.888	14.592	24.8268	22.4368	5.77145	5.73764	5.85235	4.20781	4.49321	4.61413	3.69748
ASHG19A3A022192	0.00595232	3.39232	up	noncoding	ENST00000415533	AC090042.1	Ensembl	405	chr3	+	1771753	1772158	GACATATGTTCCATTGACTCCTGCTATGAGGCTTTGGATGTTGCCAACAAAATTGGAATC	intergenic							6720.41	1724.87	12.5511	10.7888	6287.97	6992.31	6880.95	1032.05	1836.06	2014.58	2016.79	12.4393	12.5994	12.6146	11.0126	11.0818	10.0875	10.9734
ASHG19A3A032078	0.0396119	2.29929	up	noncoding	ENST00000427807	RP1-248E1.2	Ensembl	1351	chr6	+	132593120	132594471	TTTGCTGTTCATGATATGAGATAGACAGCTGCTGAAGTGTCATTAGAGCAGTGGCTGCTG	intergenic							1768.87	725.803	10.6626	9.46142	1708.58	1765.94	1832.1	363.59	795.048	863.915	880.659	10.5857	10.6434	10.7587	9.79229	9.82353	8.49311	9.73674
ASHG19A3A009690	5.095e-05	4.09165	up	noncoding	ENST00000430471	RP11-134G8.8	Ensembl	598	chr1	-	201433510	201434274	GGTTCAACTTGCTCATCTGATGTGTGAATTACATCACACAGTTGAATGAGAATTTGTTAA	intergenic							3771.43	804.679	11.7382	9.70547	4014.27	3864.94	3435.09	738.597	832.418	811.631	836.07	11.8075	11.7564	11.6506	9.70534	9.73498	9.57728	9.8043
ASHG19A3A055160	0.0141183	2.18612	up	noncoding	uc002rby.2	BC035112	UCSC_knowngene	3502	chr2	-	14368998	14541082	AGGAAGCAAGAACACCTCGAGACAGGAGGCATGGCTGGGAGGCCTCAGGAAACGTATAAT	intergenic							43.3782	26.1644	5.61365	4.48528	44.165	41.8716	44.0979	29.7028	33.5437	23.2322	18.1788	5.60965	5.57173	5.65958	3.87767	4.39076	4.70818	4.9645
ASHG19A3A029404	0.000181535	3.21943	up	noncoding	ENST00000445390	RP1-290I10.4	Ensembl	636	chr6	-	10460138	10460774	ATTAAAGTCGAGGAAAGTTATGTGATGCCAACCAAAACCACTGAAGTGTTGTGGTTGCAG	intergenic							760.804	232.17	9.50256	7.81575	805.774	741.967	734.671	228.473	223.884	250.536	225.788	9.55864	9.45699	9.49204	7.70686	7.96162	7.77804	7.81647
ASHG19A3A021731	6.45159e-05	3.79602	up	noncoding	ENST00000460914	RP11-505J9.1	Ensembl	211	chr3	-	148413780	148413991	AGAAGGCAGAGAAACTGAAGCAGTTCTGGCACCCTGGTTTGTTAGAGAAGGAGATGAAAT	intergenic							1589.69	385.643	10.507	8.58251	1683.5	1456.42	1629.15	389.73	371.328	386.349	395.166	10.5629	10.3714	10.5867	8.55516	8.60653	8.59309	8.57526
ASHG19A3A016272	0.00153597	2.4505	up	noncoding	ENST00000413602	AC013275.2	Ensembl	2019	chr2	+	120234023	120244922	TAAGCTGCCATATTTTGGAAAAATGAGCCAAGATCAGTGGTGCCAAGGGAAGAATGGGCA	intronic antisense	NM_002980	SCTR	secretin receptor precursor	-	120197418	120282028	34.7794	18.7831	5.31118	4.01811	35.6326	32.9783	35.7274	17.405	19.4952	20.9611	17.2712	5.31293	5.25622	5.3644	3.79505	4.23319	3.88718	4.15701
ASHG19A3A036507	7.28117e-08	3.28087	up	noncoding	ENST00000508840	CTD-2345M20.1	Ensembl	1898	chr8	+	30094897	30098513	TCTTTCCTTGGTATTGAAACTGATGACGGAGTCACGACTGTCCTCATTAAGCACAATACT	intergenic							8882.94	2252.61	12.9504	11.2364	8782.19	9119.25	8747.4	2252.28	2188.62	2288.17	2281.39	12.9118	12.9768	12.9627	11.2	11.2722	11.2397	11.2335
ASHG19A3A030186	0.0270018	2.53271	up	noncoding	ENST00000403828	RP11-486E2.1	Ensembl	1349	chr6	-	81265557	81266906	TCTGAAACACCACATAATGACCCCATGTTAACTTGGTTGCTCAACTACACAAGATTGTGC	intergenic							34.9853	18.5025	5.29487	3.95419	34.4951	26.5093	43.9515	11.855	19.1949	20.4705	22.4897	5.26574	4.96536	5.65351	4.21173	4.19764	3.27256	4.13482
ASHG19A3A011796	0.0133378	2.25049	up	noncoding	ENST00000434269	ZNF702P	Ensembl	1966	chr19	-	53472162	53474128	CACTCCTTGCAGGACATCAGGAAATTCATTTTTGAGGTAATAATTTCAAATGCAATGAGT	intergenic							401.435	181.757	8.61663	7.44639	464.82	455.66	283.825	183.66	184.282	180.08	179.006	8.83642	8.80687	8.20661	7.35594	7.45765	7.45016	7.52181
ASHG19A3A014170	0.000720444	2.38482	up	noncoding	uc002tee.3	FLJ38668	UCSC_knowngene	547	chr2	-	109124004	109150675	AGTCAAGAAGAACATGCCCCAAGTTATTCGTCAGTGAGGCGGAAATTGTGGTGTACTTGT	bidirectional	NM_001193483	LIMS1	LIM and senescent cell antigen-like-containing	+	109150856	109303702	111.68	55.4953	6.91341	5.65953	121.74	104.64	108.66	56.8185	61.6597	46.4438	57.0593	7.02455	6.81264	6.90304	5.63674	5.43409	5.68237	5.88493
ASHG19A3A014170	0.000720444	2.38482	up	noncoding	uc002tee.3	FLJ38668	UCSC_knowngene	547	chr2	-	109124004	109150675	AGTCAAGAAGAACATGCCCCAAGTTATTCGTCAGTGAGGCGGAAATTGTGGTGTACTTGT	natural antisense	NM_181453	GCC2	GRIP and coiled-coil domain-containing protein	+	109065576	109125854	111.68	55.4953	6.91341	5.65953	121.74	104.64	108.66	56.8185	61.6597	46.4438	57.0593	7.02455	6.81264	6.90304	5.63674	5.43409	5.68237	5.88493
ASHG19A3A024005	0.040567	2.20309	up	noncoding	ENST00000504991	RP11-339D20.1	Ensembl	413	chr4	-	20039182	20039595	TTGAACTATGGGAAGATTTGACTGTCTTGGATGTCAGCTTATTATTCCATAGGTGGGGGG	intergenic							33.1554	21.5733	5.24274	4.10321	35.1908	30.4089	33.8664	34.7573	23.0275	12.0543	16.454	5.29594	5.14469	5.2876	3.71659	3.34868	4.94654	4.40105
ASHG19A3A042241	0.000167722	3.63494	up	noncoding	ENST00000458678	RP11-435F13.1	Ensembl	957	chr1	+	241082952	241083909	AATACTTTGTCAAACCATGAAACTAAGGTGGCTATGGTGGTTGCAGTAACAGCAGTAGCT	intronic antisense	NM_002924	RGS7	regulator of G-protein signaling 7	-	240938816	241520478	2281.56	564.414	11.0327	9.17074	2320.61	2175.56	2348.5	513.391	545.335	575.881	623.051	11.037	10.9513	11.1097	9.25978	9.22183	9.02982	9.17153
ASHG19A3A047100	0.000311826	2.22926	up	noncoding	HIT000047909		H-invDB	3337	chr11	+	124983057	124996677	TACACTTTGGGGAGCAGGAAGCCAATAAAAAGTTCAGAAGTCATTGGATGTCAAAAATAA	intergenic							241.727	118.23	7.95249	6.79592	263.506	213.2	248.473	122.8	113.967	114.839	121.314	8.06274	7.7793	8.01542	6.76976	6.77575	6.83978	6.7984
ASHG19A3A007431	0.00058968	3.5029	up	noncoding	NR_026871	LOC441869	RefSeq_NR	1501	chr1	-	1353801	1356650	GGCAAGGTGCCAGCGTGGAGGAGAGGACATTGAGGTGCTGCTGGGCCACGGGGCAGACCC	exon sense-overlapping	NM_001145210	LOC441869	hypothetical protein LOC441869	-	1353799	1356650	279.005	87.9999	8.15129	6.34274	295.224	275.786	266.007	92.2252	97.494	69.0334	93.2471	8.21888	8.12159	8.1134	6.36386	6.02663	6.41864	6.56183
ASHG19A3A039512	1.86182e-06	2.20533	up	noncoding	uc004coq.3	DQ582201	UCSC_knowngene	132	chrM	-	236	368	GTTTTTGGGGTTTGGCAGAGATGTGTTTAAGTGCTGTGGCCAGAAGCGGGGGGAGGGGGG	intergenic							36792.8	13002.7	14.9569	13.8159	37522.2	37624.7	35231.4	12837.8	12695.3	12986.7	13490.9	14.945	14.9856	14.9401	13.7991	13.8237	13.8139	13.8269
ASHG19A3A052850	0.000199994	2.40844	up	noncoding	ENST00000507729	AC122108.1	Ensembl	1916	chr15	+	45021319	45025045	TGTGGACATTCTGGACCACATAAATAAAGACAACACCCTAGAGATGGTGAAGTAAGTTGT	intergenic							6138.82	2152.26	12.4328	11.1647	6243.61	6433.66	5739.19	1899.79	2229.06	2189.94	2290.25	12.4279	12.4919	12.3785	11.2082	11.2055	10.9882	11.2568
ASHG19A3A031648	0.00233114	7.31739	up	noncoding	ENST00000407852	RP11-524H19.1	Ensembl	437	chr6	+	54635380	54635821	CAGTAGACACAAAAGGCTCAGGACTTAGCAAGGAGTTAGGGAATTCCCTTTATTGAAACC	intergenic							162.59	27.6253	7.42326	4.55194	175.694	164.736	147.339	31.3731	36.8597	17.1173	25.1511	7.52049	7.43023	7.31907	4.3904	3.91553	4.79398	5.10783
ASHG19A3A034507	0.0145642	2.31024	up	noncoding	ENST00000422817	RP3-455J7.3	Ensembl	456	chr1	+	167560628	167561084	TGTAAAGGATGGAAACTATAGCTAGGTCCTGGTCTGGAAAACAAGCTCTGTGAAGACCTG	intergenic							3170.56	1215.61	11.4932	10.2852	3177.9	3140.85	3192.94	751.651	1360.6	1279.57	1470.6	11.4748	11.4649	11.5399	10.562	10.4282	9.60718	10.5433
ASHG19A3A053577	0.00182615	2.25296	up	noncoding	uc002djs.3	LOC23117	UCSC_knowngene	3910	chr16	-	21848005	21902953	AGATGCTATCCTTTGGCAGTGGGCCATATGGGAAGCTGCACAATTCACTGTTCTTTCTAA	intergenic							158.857	80.1377	7.38529	6.21347	183.459	156.35	136.763	86.7906	73.1613	78.9081	81.6909	7.58018	7.36005	7.21565	6.1735	6.21796	6.32821	6.13421
ASHG19A3A026597	0.000183051	2.16802	up	noncoding	ENST00000514549	RP11-61K20.1	Ensembl	312	chr5	-	20158770	20159082	TTACAGAAATTATTGAAGGACATCTGGCAAACAGAGAACATAGACCAACTTGCTGCATGA	intergenic							1276.88	535.871	10.2115	9.09516	1315.34	1256.62	1258.68	517.355	524.3	564.403	537.428	10.2359	10.1748	10.2239	9.03388	9.18969	9.04283	9.11423
ASHG19A3A007161	0.00019065	2.62768	up	noncoding	uc011kfs.1	SPDYE8P	UCSC_knowngene	5766	chr7	+	74936532	74974605	GGGACAAAGATCTGAGGGTGTCGGACAAGTATCTCCTGGCTATGGTCATAGCGTATTTCA	intergenic							109.94	49.7843	6.89448	5.50069	109.268	109.833	110.718	46.7057	54.28	47.7987	50.3526	6.87477	6.87955	6.92913	5.44463	5.47709	5.39017	5.69088
ASHG19A3A007717	0.00018488	3.15092	up	noncoding	NR_033125	ALG13	RefSeq_NR	2927	chrX	+	110924345	110933623	TGTGTCGGCGCCCGACAGTCTGCAAGTACAAGGATTCCTTGAAAGAAGACATTCAGAAAG	exon sense-overlapping	NM_018466	ALG13	UDP-N-acetylglucosamine transferase subunit	+	110924345	110933623	168.816	61.6792	7.47413	5.81836	178.72	171.195	156.531	58.3505	63.7826	54.6797	69.904	7.54398	7.48172	7.39669	5.93718	5.677	5.72236	5.93689
ASHG19A3A007717	0.00018488	3.15092	up	noncoding	NR_033125	ALG13	RefSeq_NR	2927	chrX	+	110924345	110933623	TGTGTCGGCGCCCGACAGTCTGCAAGTACAAGGATTCCTTGAAAGAAGACATTCAGAAAG	exon sense-overlapping	NM_001099922	ALG13	UDP-N-acetylglucosamine transferase subunit	+	110924345	111003875	168.816	61.6792	7.47413	5.81836	178.72	171.195	156.531	58.3505	63.7826	54.6797	69.904	7.54398	7.48172	7.39669	5.93718	5.677	5.72236	5.93689
ASHG19A3A007717	0.00018488	3.15092	up	noncoding	NR_033125	ALG13	RefSeq_NR	2927	chrX	+	110924345	110933623	TGTGTCGGCGCCCGACAGTCTGCAAGTACAAGGATTCCTTGAAAGAAGACATTCAGAAAG	exon sense-overlapping	NM_001168385	ALG13	UDP-N-acetylglucosamine transferase subunit	+	110924345	110933623	168.816	61.6792	7.47413	5.81836	178.72	171.195	156.531	58.3505	63.7826	54.6797	69.904	7.54398	7.48172	7.39669	5.93718	5.677	5.72236	5.93689
ASHG19A3A007717	0.00018488	3.15092	up	noncoding	NR_033125	ALG13	RefSeq_NR	2927	chrX	+	110924345	110933623	TGTGTCGGCGCCCGACAGTCTGCAAGTACAAGGATTCCTTGAAAGAAGACATTCAGAAAG	exon sense-overlapping	NM_001039210	ALG13	UDP-N-acetylglucosamine transferase subunit	+	110924345	110933623	168.816	61.6792	7.47413	5.81836	178.72	171.195	156.531	58.3505	63.7826	54.6797	69.904	7.54398	7.48172	7.39669	5.93718	5.677	5.72236	5.93689
ASHG19A3A028520	8.72817e-05	3.86064	up	noncoding	ENST00000395970	AC008500.1	Ensembl	1242	chr5	+	92603043	92604293	AAACTAAAAGGCACCATTGACGTGTCAAAGTTGGTTACAGGGATCATCCTGGCCGTGTTT	intergenic							974.113	243.484	9.83931	7.89047	970.715	1018.33	933.293	248.089	249.391	218.255	258.202	9.82146	9.88131	9.81514	7.91717	7.74831	7.90587	7.99052
ASHG19A3A042598	1.20161e-05	2.33816	up	noncoding	ENST00000442520	RP11-460H18.2	Ensembl	397	chr10	-	32520776	32521173	AAGAACAGAATGAAGAAAGTCAGGGGACTGTAAAGGCCAATGTTTGTGTGGGCAAAAAGC	intergenic							61423.8	19857.6	15.6678	14.4424	64017.2	60690.6	59563.7	19302.1	20487.8	19434.3	20206.2	15.6734	15.6466	15.6834	14.3951	14.4334	14.4359	14.5053
ASHG19A3A033094	3.00848e-05	3.94522	up	noncoding	uc003uhq.1	AK092048	UCSC_knowngene	3218	chr7	-	81575759	81578977	GCCAACTGGCTTTTGTGAACAATAGATCTTTTCTCCCCTTTATTTTGTTCTCTTGACACT	intergenic							35247.8	7094.14	14.8932	12.9131	35727	36802.3	33214.2	6908.83	7013.54	6691.44	7762.75	14.8704	14.9457	14.8635	12.9877	12.8438	12.8868	12.9342
ASHG19A3A052744	0.000972163	2.70791	up	noncoding	NR_003144	LOC723972	RefSeq_NR	738	chr15	+	35529526	35530262	GTAACCAACCTGAACGACTACCGAGAAAATGTGTTCAAGCTCCTCCTGCAACTCACATAT	intergenic							1773.24	590.348	10.6669	9.22968	1849.67	1724.51	1745.52	480.818	648.682	579.149	652.741	10.7074	10.6036	10.6896	9.32898	9.23149	8.9257	9.43253
ASHG19A3A010196	0.000320738	2.66173	up	noncoding	HIT000067275		H-invDB	495	chr18	-	20504868	20505362	TGGTGACAGTTTGTTTTTGTGGACTATTTAGGATACTAAAATTGAAATAGATAGGCTTCC	intergenic							142.049	62.3274	7.24153	5.82917	145.032	145.763	135.351	64.9694	55.7996	55.1099	73.4305	7.25744	7.2643	7.20286	6.0101	5.6892	5.88527	5.7321
ASHG19A3A023486	2.47189e-05	16.6216	up	noncoding	ENST00000454471	RP11-450H5.2	Ensembl	525	chr3	+	166408975	166409502	CTGTATAATGCTGTCACGATTGAAGATGTTCAGAAGCTAGCCGCCTTCATGAAAAAATTT	intergenic							3717.42	209.2	11.7116	7.65659	4361.19	3253.26	3537.82	217.243	206.856	200.885	211.817	11.9247	11.5153	11.6947	7.61155	7.62	7.6969	7.69792
ASHG19A3A007468	0.0129233	18.681	up	noncoding	NR_027082	SFTA1P	RefSeq_NR	693	chr10	-	10826401	10836877	TTCCCTGTGACCTCCTGCAAATAAGGGAGAGACAAAGAGAAGAGCAGAAGAACAGAAGAA	intergenic							561.158	46.8155	9.0682	4.84471	721.514	446.392	515.568	97.46	34.6382	5.5417	49.6223	9.4182	8.7798	9.00662	5.42088	2.44686	6.4957	5.01538
ASHG19A3A023182	0.00204978	3.88876	up	noncoding	NR_026991	C3orf47	RefSeq_NR	2211	chr3	+	129035113	129043412	TTCTTGAAGAAGGACCATGTGAATTTCCTGACAGAGAACGGGGATGGGTTTCTGAAAGCA	natural antisense	NM_006026	H1FX	histone H1x	-	129033613	129035120	450.046	120.907	8.7823	6.82299	506.853	493.097	350.19	133.163	121.608	104.625	124.232	8.94459	8.90754	8.49476	6.80156	6.63787	6.95611	6.8964
ASHG19A3A053889	0.000145441	2.30614	up	noncoding	uc010cfp.1	AK308867	UCSC_knowngene	1210	chr16	-	70263706	70269272	TCTTTTGGCAGTGGGCCATATGGGAAGCTGCACAATTCACTGTTCTTTCTAAGCTGAGAA	intergenic							143.508	71.7102	7.25588	6.0504	147.599	137.367	145.557	70.7456	66.8314	72.4273	76.8365	7.2813	7.18451	7.30181	6.07959	6.10095	6.01539	6.00566
ASHG19A3A043894	3.48283e-05	6.47128	up	noncoding	ENST00000399501	RP11-292F22.3	Ensembl	1273	chr10	+	47594378	47595651	TATGTAACACTGGACACTTTGAGGTGGAGATCAATGTCAAGTGGCTCAGTGAGAACCCTT	intergenic							890.674	137.947	9.72116	7.02711	915.731	874.03	882.262	134.629	129.456	150.882	136.819	9.73386	9.68548	9.74414	6.95307	7.18822	6.97413	6.99304
ASHG19A3A049940	0.00925332	2.33575	up	noncoding	ENST00000418454	HMGA1L6	Ensembl	1082	chr13	+	23708312	23709394	TTCACTATTCCCTCTGGCTTCCCAATAGTGGGGACTGGGAGGGTTCCCCTGGCCTGAAAA	intergenic							368.378	171.645	8.53656	7.31268	387.164	359.62	358.35	118.206	197.361	147.768	223.244	8.5924	8.48708	8.53021	7.68869	7.15878	6.77622	7.62703
ASHG19A3A035851	8.44509e-06	2.08075	up	noncoding	BC047111		NRED	1825	chr8	-	71022010	71023821	TAGAAGCAAAAGCCAAATCAGTTCCCTTCATTATCAGTATTTCTCATGCTGTACACAATA	intergenic							2329.82	974.786	11.061	10.0039	2393.3	2371.15	2225	937.654	961.152	967.701	1032.64	11.0798	11.0713	11.0318	10.0321	10.0045	9.95172	10.027
ASHG19A3A012829	0.000484034	3.9954	up	noncoding	ENST00000503632	AC011551.1	Ensembl	1002	chr19	+	47061897	47062899	GGACCTGACCTGCCATCTGGGAAAACCCTGCCAAATATGATGATGTCAAGAAAATGATGA	intronic antisense	NM_001205281	LOC100506012	serine/threonine-protein phosphatase 5-like	-	46984044	47104457	44701.3	8772.84	15.2231	13.2248	44153.8	48239	41711.2	8327.34	9522.14	7583.17	9658.73	15.1777	15.3259	15.1658	13.3168	13.0118	13.1673	13.4033
ASHG19A3A037370	0.00638357	4.15726	up	noncoding	ENST00000429555	RP11-347J14.4	Ensembl	415	chr9	-	39368375	39368790	GGGAAAACCTCCAGAAAGTTTTTTCTGTGGGAGTTCTTTGTAAAATAATAACAATGCAAC	intergenic							82.6263	25.939	6.48379	4.42815	68.5519	100.145	79.1818	14.3228	23.2799	35.3905	30.7626	6.22887	6.75513	6.46735	4.69599	5.02499	3.57568	4.41595
ASHG19A3A040304	1.54617e-05	2.56443	up	noncoding	ENST00000424316	RP11-517D11.3	Ensembl	1510	chrX	-	115238173	115239683	CCCAGTGGGAAATATAGCAGCAATTTGAGCAACTTTAATTATGAGAGGAGCCTTCAGGGG	intergenic							555.18	217.837	9.07636	7.71772	592.935	563.095	509.51	210.624	207.779	220.9	232.046	9.15578	9.08077	8.99254	7.7486	7.76788	7.65049	7.70394
ASHG19A3A032842	0.000213661	12.4525	up	noncoding	ENST00000417282	RP11-700P18.2	Ensembl	849	chr7	-	56372370	56373219	CCACACACAAGTCAGATCGTCAGCATGAGAAAAAGAAAGAAAAGGAGTGTGAAGAATTTG	intergenic							149.643	15.2002	7.31045	3.67208	151.378	139.681	157.871	12.3012	14.9317	17.5093	16.0585	7.31676	7.20747	7.40712	3.67696	3.95194	3.32627	3.73317
ASHG19A3A038523	0.0205096	2.41827	up	noncoding	ENST00000423138	RP11-156G14.1	Ensembl	2257	chr9	+	35433702	35482206	AATTCATGACCTTCTTTTGCTTTTGCCTCTGTGGATGAAAACCCTATCCCCCATGCTCTG	intergenic							1081.53	444.453	9.97944	8.70547	1074.99	1074.99	1094.62	748.261	367.646	314.552	347.352	9.95112	9.95242	10.0348	8.3612	8.30327	9.59906	8.55834
ASHG19A3A022462	0.000385898	4.15385	up	noncoding	ENST00000426017	RP11-191G24.1	Ensembl	362	chr1	+	51984054	52027301	CAGCAGAAGCAGCGTAAAGTATTGGAACTTTGAATCTGACATCAGAAAGACCTGCACTCA	intronic antisense	NM_001981	EPS15	epidermal growth factor receptor substrate 15	-	51819934	51984995	78.4909	23.7453	6.42344	4.369	90.0564	70.9361	74.4801	21.7056	27.6833	19.7469	25.8452	6.60885	6.28178	6.3797	4.42933	4.14203	4.22513	4.6795
ASHG19A3A012181	0.000120573	9.4195	up	noncoding	ENST00000500679	AC008567.2	Ensembl	2288	chr19	+	9633899	9637304	AAGATTTCTCTCCAGTGTGAGTTCTTTAATGACATGGAAAGGGACTGTAAGAATTGAAGA	intergenic							98.0375	13.6006	6.73413	3.49848	108.279	94.9458	90.8873	12.4464	15.299	12.9458	13.7114	6.86441	6.68393	6.65404	3.41105	3.4591	3.3471	3.77668
ASHG19A3A015546	1.64635e-06	10.44	up	noncoding	ENST00000435255	AC018693.5	Ensembl	530	chr2	+	38996406	38997266	TTCCTGCCTTGACAGGGGTGAAGATTTGTGCTGAGAAGCTGTTTGATGAGATTCAGCATA	intergenic							1780.09	164.07	10.6731	7.28907	1847.33	1861.3	1631.65	165.931	154.45	166.452	169.448	10.7061	10.7224	10.5909	7.26845	7.33724	7.2929	7.25769
ASHG19A3A019024	0.0109495	2.12596	up	noncoding	BC010113		misc_RNA	837	chr21	-	47865711	47866530	CTTACGAGTTTAACATAAACTCTCTGCTCAATTTTTTAGTCAGTGAGAAAGGCAAACTGA	intergenic							99.3497	56.2887	6.75331	5.66519	101.14	107.064	89.8457	48.6436	73.3924	50.9457	52.1732	6.77463	6.84425	6.64105	5.49988	5.57046	5.45013	6.14029
ASHG19A3A035242	0.0062574	3.62137	up	noncoding	ENST00000421443	RP11-307I2.1	Ensembl	426	chr7	+	143493387	143493813	AGATTCTTGAACGGAAAGCCAAATCTTAGCAAGTAGGAAGGGAAAGGGGCAAATACAAGG	intergenic							5142.51	1260.22	12.1786	10.322	5028.68	5033.48	5365.38	757.893	1479.41	1173.18	1630.38	12.1192	12.1424	12.2741	10.7118	10.2943	9.62106	10.6609
CUST_187_PI426075208	5.36551e-05	5.61019	up	noncoding	nc-HOXD4-22+	nc-HOXD4-22	HOX cluster	706	chr2	-	176996730	176997436	TACGCAAAGAAACCTTTTAGGAGTAAACAAAACGCACCCGAACTATTCATTATAAAGGAA	natural antisense	NM_019558	HOXD8	homeobox protein Hox-D8 isoform 1	+	176994467	176997423	148.585	31.5548	7.30285	4.8148	155.847	148.249	141.658	31.2363	33.9837	29.3661	31.6331	7.35783	7.28561	7.26512	4.74229	4.7464	4.78504	4.9855
CUST_187_PI426075208	5.36551e-05	5.61019	up	noncoding	nc-HOXD4-22+	nc-HOXD4-22	HOX cluster	706	chr2	-	176996730	176997436	TACGCAAAGAAACCTTTTAGGAGTAAACAAAACGCACCCGAACTATTCATTATAAAGGAA	natural antisense	NM_001199746	HOXD8	homeobox protein Hox-D8 isoform 2	+	176994467	176997423	148.585	31.5548	7.30285	4.8148	155.847	148.249	141.658	31.2363	33.9837	29.3661	31.6331	7.35783	7.28561	7.26512	4.74229	4.7464	4.78504	4.9855
CUST_187_PI426075208	5.36551e-05	5.61019	up	noncoding	nc-HOXD4-22+	nc-HOXD4-22	HOX cluster	706	chr2	-	176996730	176997436	TACGCAAAGAAACCTTTTAGGAGTAAACAAAACGCACCCGAACTATTCATTATAAAGGAA	natural antisense	NM_001199747	HOXD8	homeobox protein Hox-D8 isoform 3	+	176994421	176997423	148.585	31.5548	7.30285	4.8148	155.847	148.249	141.658	31.2363	33.9837	29.3661	31.6331	7.35783	7.28561	7.26512	4.74229	4.7464	4.78504	4.9855
ASHG19A3A021231	0.00270655	4.53889	up	noncoding	ENST00000461635	RP11-436J20.1	Ensembl	651	chr3	-	68682856	68683507	GAGAGTTGGACAAGGATATGGAGTTTGGTCTCATTGATCACCAAAAAGCAACCAACTTAG	intergenic							8924.76	1690.88	12.9554	10.7731	8608.46	8724.98	9440.83	1078.94	1835.92	1793.67	2055	12.882	12.9146	13.0698	11.0506	10.9111	10.1579	10.9728
ASHG19A3A034460	0.000570419	2.32463	up	noncoding	ENST00000441415	RP11-460N20.5	Ensembl	586	chr7	+	64544480	64560610	GGAATCGCAAGGCTGGAAAACATCATTCAAGTGGGCAATCGAATTAAATTTCTTATTAAA	intergenic							733.96	309.011	9.44706	8.23006	831.064	654.645	716.17	272.026	313.595	258.917	391.505	9.60041	9.28336	9.45741	8.54121	8.0073	8.04648	8.32526
ASHG19A3A033854	0.000932104	3.58681	up	noncoding	ENST00000449721	AC091729.7	Ensembl	869	chr7	+	1114085	1117672	TCACAGTGGTGGGAAGTTTCTCTCCTAAAACGAAAGCTTCTCTATACTACAGATTGGCCC	intronic antisense	NM_001134395	C7orf50	hypothetical protein LOC84310	-	1036622	1177893	192.557	61.6623	7.65518	5.81248	204.569	192.629	180.473	69.6334	67.167	49.4463	60.4023	7.73059	7.64049	7.59446	5.7162	5.52692	5.99278	6.01403
ASHG19A3A033854	0.000932104	3.58681	up	noncoding	ENST00000449721	AC091729.7	Ensembl	869	chr7	+	1114085	1117672	TCACAGTGGTGGGAAGTTTCTCTCCTAAAACGAAAGCTTCTCTATACTACAGATTGGCCC	intronic antisense	NM_001134396	C7orf50	hypothetical protein LOC84310	-	1036622	1177893	192.557	61.6623	7.65518	5.81248	204.569	192.629	180.473	69.6334	67.167	49.4463	60.4023	7.73059	7.64049	7.59446	5.7162	5.52692	5.99278	6.01403
ASHG19A3A033854	0.000932104	3.58681	up	noncoding	ENST00000449721	AC091729.7	Ensembl	869	chr7	+	1114085	1117672	TCACAGTGGTGGGAAGTTTCTCTCCTAAAACGAAAGCTTCTCTATACTACAGATTGGCCC	intronic antisense	NM_032350	C7orf50	hypothetical protein LOC84310	-	1036622	1177893	192.557	61.6623	7.65518	5.81248	204.569	192.629	180.473	69.6334	67.167	49.4463	60.4023	7.73059	7.64049	7.59446	5.7162	5.52692	5.99278	6.01403
ASHG19A3A034017	0.0452888	2.15983	up	noncoding	uc003sun.1	BC043576	UCSC_knowngene	1526	chr7	+	19183915	19185876	TTCCTTTCCCTACCTTTACCTCCTACTCATATAAAATAGAGGATTTTATTCCAAGAGGAA	natural antisense	NM_152898	FERD3L	fer3-like protein	-	19184404	19185044	270.724	144.81	8.1092	6.99828	297.466	242.741	271.964	241.887	129.697	118.428	89.2294	8.23034	7.95356	8.14369	6.30174	6.8262	7.86961	6.99556
ASHG19A3A035711	0.00148083	2.19248	up	noncoding	ENST00000476002	RP11-479P21.1	Ensembl	1164	chr8	-	39015056	39016220	TTCATCAAGGATGGCAAATTGATCAGTGCCTCCACTGACTATAACCTGACAAGAGCATCA	intronic antisense	NM_145004	ADAM32	disintegrin and metalloproteinase	+	38965049	39142436	3026.82	1186.25	11.4246	10.2921	3188.34	2771.84	3120.29	1263.75	1206.52	1220.99	1053.75	11.48	11.2826	11.5113	10.0589	10.3567	10.396	10.3567
ASHG19A3A007398	0.0228432	2.35597	up	noncoding	NR_026700	GLYCTK	RefSeq_NR	2792	chr3	+	52321835	52329271	GCACCGCGGCCGGAGCTGTGGGCTGGGAGATGCTGCTGAAGCCACATAGCCGTGTCCAGG	exon sense-overlapping	NM_145262	GLYCTK	glycerate kinase isoform 1	+	52321835	52329272	37.1029	21.6651	5.38972	4.1534	43.7658	32.2791	35.2638	30.5531	23.1127	12.1926	20.8018	5.59656	5.22705	5.34555	4.08614	3.36785	4.7522	4.40741
ASHG19A3A007398	0.0228432	2.35597	up	noncoding	NR_026700	GLYCTK	RefSeq_NR	2792	chr3	+	52321835	52329271	GCACCGCGGCCGGAGCTGTGGGCTGGGAGATGCTGCTGAAGCCACATAGCCGTGTCCAGG	exon sense-overlapping	NM_001144951	GLYCTK	glycerate kinase isoform 2	+	52321835	52327021	37.1029	21.6651	5.38972	4.1534	43.7658	32.2791	35.2638	30.5531	23.1127	12.1926	20.8018	5.59656	5.22705	5.34555	4.08614	3.36785	4.7522	4.40741
ASHG19A3A041095	0.000898443	4.87039	up	noncoding	ENST00000422965	RP3-323B6.2	Ensembl	589	chrX	+	64627963	64628552	TACGAAATGCCATATGGATTAAACATTGAAATGCACAAACAGACTGAAATCGCCAAGAGA	intergenic							450.203	100.258	8.80492	6.52088	465.246	445.917	439.447	71.278	96.3437	114.09	119.319	8.83852	8.77784	8.79841	6.74439	6.76416	6.02669	6.54829
ASHG19A3A030420	3.84288e-05	16.9792	up	noncoding	uc009wkz.1	FCGR1C	UCSC_knowngene	566	chr1	+	149370546	149375252	GCTCAGGCAAGGGAAAGCATCACTACACATCAGCAGGAATATCACAATACACTGTGAAAG	intergenic							3155.45	177.727	11.4896	7.40393	3216.19	3229.35	3020.82	179.352	200.728	148.979	181.849	11.4939	11.5035	11.4714	7.37886	7.17035	7.41277	7.65374
ASHG19A3A027003	0.00432337	2.49087	up	noncoding	ENST00000421252	CTC-431G16.2	Ensembl	460	chr5	-	79070170	79112013	TTTTTGAAAGTGTTTTGAGCCCACCCAACCTGAGGAGAGCATTCAAAGAAAAACAGGAAG	intronic antisense	NM_153610	CMYA5	cardiomyopathy-associated protein 5	+	78985658	79096049	96.7674	47.6941	6.70684	5.39018	112.763	81.7137	95.8259	38.628	60.3684	33.4495	58.3307	6.91907	6.47215	6.72928	5.66598	4.93657	5.10443	5.85376
ASHG19A3A027518	0.00104576	3.37201	up	noncoding	ENST00000511085	AC005740.4	Ensembl	419	chr5	-	141416271	141416690	AATCAAGATTGGACAACCCACTGTTTCCTACTTCGTGAAGGCAGCAGCTGGGATTGAAAA	intergenic							2338.29	629.306	11.0648	9.31118	2384.86	2425.17	2204.85	485.351	544.432	749.096	738.345	11.0726	11.1039	11.0178	9.51652	9.6188	8.93989	9.16949
CUST_393_PI426073487	0.000740374	3.77124	up	noncoding	uc.395+	uc.395	UCR	249	chr16	+	24579002	24579251	GAGCGTAGGCGCTCATTTTCCAGGTTAGTGTTTTGCAAGCCTTCACAACAGAATTACAAA	intron sense-overlapping	NM_018703	RBBP6	E3 ubiquitin-protein ligase RBBP6 isoform 2	+	24550907	24584183	97.7855	31.9044	6.7286	4.81356	93.104	109.82	90.4329	24.0677	34.7724	35.5255	33.2518	6.65904	6.87931	6.64744	4.81497	5.03126	4.38695	5.02105
CUST_393_PI426073487	0.000740374	3.77124	up	noncoding	uc.395+	uc.395	UCR	249	chr16	+	24579002	24579251	GAGCGTAGGCGCTCATTTTCCAGGTTAGTGTTTTGCAAGCCTTCACAACAGAATTACAAA	exon sense-overlapping	NM_006910	RBBP6	E3 ubiquitin-protein ligase RBBP6 isoform 1	+	24550907	24584183	97.7855	31.9044	6.7286	4.81356	93.104	109.82	90.4329	24.0677	34.7724	35.5255	33.2518	6.65904	6.87931	6.64744	4.81497	5.03126	4.38695	5.02105
ASHG19A3A024289	0.00833475	5.14178	up	noncoding	ENST00000509304	RP11-618I10.4	Ensembl	709	chr4	-	70172184	70172893	GAAGCTACAGGAAACCAACTACGATGTAATGCTTAAAGACCCTGTGATTCCCCATGGAGA	intergenic							177.872	42.1097	7.52885	5.16658	219.438	152.762	161.415	61.3623	28.622	49.509	28.9457	7.82185	7.32705	7.43765	4.60462	5.52815	5.80156	4.73199
ASHG19A3A007687	3.45565e-05	4.46111	up	noncoding	NR_029403	CCT7	RefSeq_NR	1799	chr2	+	73461363	73480149	TGGACAAGCTTATTGTAGATGGCAGAGTTTCTGAAGCAGGTGAAACCCTATGTGGAGGAA	exon sense-overlapping	NM_001166285	CCT7	T-complex protein 1 subunit eta isoform d	+	73461363	73480150	990.788	215.488	9.85952	7.70212	1048.58	1032.51	891.273	222.099	207.035	211.889	220.928	9.92214	9.89815	9.75827	7.67362	7.70297	7.7327	7.69918
ASHG19A3A007687	3.45565e-05	4.46111	up	noncoding	NR_029403	CCT7	RefSeq_NR	1799	chr2	+	73461363	73480149	TGGACAAGCTTATTGTAGATGGCAGAGTTTCTGAAGCAGGTGAAACCCTATGTGGAGGAA	exon sense-overlapping	NM_006429	CCT7	T-complex protein 1 subunit eta isoform a	+	73461363	73480150	990.788	215.488	9.85952	7.70212	1048.58	1032.51	891.273	222.099	207.035	211.889	220.928	9.92214	9.89815	9.75827	7.67362	7.70297	7.7327	7.69918
ASHG19A3A007687	3.45565e-05	4.46111	up	noncoding	NR_029403	CCT7	RefSeq_NR	1799	chr2	+	73461363	73480149	TGGACAAGCTTATTGTAGATGGCAGAGTTTCTGAAGCAGGTGAAACCCTATGTGGAGGAA	exon sense-overlapping	NM_001009570	CCT7	T-complex protein 1 subunit eta isoform b	+	73461363	73480150	990.788	215.488	9.85952	7.70212	1048.58	1032.51	891.273	222.099	207.035	211.889	220.928	9.92214	9.89815	9.75827	7.67362	7.70297	7.7327	7.69918
ASHG19A3A007687	3.45565e-05	4.46111	up	noncoding	NR_029403	CCT7	RefSeq_NR	1799	chr2	+	73461363	73480149	TGGACAAGCTTATTGTAGATGGCAGAGTTTCTGAAGCAGGTGAAACCCTATGTGGAGGAA	exon sense-overlapping	NM_001166284	CCT7	T-complex protein 1 subunit eta isoform c	+	73461363	73480150	990.788	215.488	9.85952	7.70212	1048.58	1032.51	891.273	222.099	207.035	211.889	220.928	9.92214	9.89815	9.75827	7.67362	7.70297	7.7327	7.69918
ASHG19A3A036924	0.0413509	2.33274	up	noncoding	NR_003367	PVT1	RefSeq_NR	1918	chr8	+	128806778	129113498	AACTATTAAGGGGAAACAAAAGTGTTCTTAGGAGTCCTGCTGTCACTGTGGATTGAGCCG	intergenic							75.4049	43.3596	6.37553	5.15351	73.8541	77.3843	74.9763	77.4139	34.5729	24.3058	37.1459	6.34035	6.39833	6.38792	4.98673	4.46192	6.15293	5.01246
ASHG19A3A051585	0.000441373	3.90302	up	noncoding	ENST00000504856	AC004846.2	Ensembl	2483	chr14	+	73742381	73752205	TTAGTACGCTGCTTGGACTTATTTTCTAATGCAGCCCACTGGGCTTCAAAAGGATCCACT	natural antisense	NM_001005744	NUMB	protein numb homolog isoform 2	-	73741917	73925286	60.5319	19.9082	6.06524	4.10065	63.3064	63.5731	54.7162	22.8398	16.6069	21.2295	18.9565	6.11194	6.13071	5.95308	3.93924	4.25262	4.30573	3.90502
ASHG19A3A051585	0.000441373	3.90302	up	noncoding	ENST00000504856	AC004846.2	Ensembl	2483	chr14	+	73742381	73752205	TTAGTACGCTGCTTGGACTTATTTTCTAATGCAGCCCACTGGGCTTCAAAAGGATCCACT	natural antisense	NM_001005745	NUMB	protein numb homolog isoform 4	-	73741917	73925286	60.5319	19.9082	6.06524	4.10065	63.3064	63.5731	54.7162	22.8398	16.6069	21.2295	18.9565	6.11194	6.13071	5.95308	3.93924	4.25262	4.30573	3.90502
ASHG19A3A051585	0.000441373	3.90302	up	noncoding	ENST00000504856	AC004846.2	Ensembl	2483	chr14	+	73742381	73752205	TTAGTACGCTGCTTGGACTTATTTTCTAATGCAGCCCACTGGGCTTCAAAAGGATCCACT	natural antisense	NM_003744	NUMB	protein numb homolog isoform 3	-	73741917	73925286	60.5319	19.9082	6.06524	4.10065	63.3064	63.5731	54.7162	22.8398	16.6069	21.2295	18.9565	6.11194	6.13071	5.95308	3.93924	4.25262	4.30573	3.90502
ASHG19A3A051585	0.000441373	3.90302	up	noncoding	ENST00000504856	AC004846.2	Ensembl	2483	chr14	+	73742381	73752205	TTAGTACGCTGCTTGGACTTATTTTCTAATGCAGCCCACTGGGCTTCAAAAGGATCCACT	natural antisense	NM_001005743	NUMB	protein numb homolog isoform 1	-	73741917	73925286	60.5319	19.9082	6.06524	4.10065	63.3064	63.5731	54.7162	22.8398	16.6069	21.2295	18.9565	6.11194	6.13071	5.95308	3.93924	4.25262	4.30573	3.90502
ASHG19A3A000247	0.00601812	2.60506	up	noncoding	ENST00000438368	AC092296.1	Ensembl	761	chr19	-	36811506	36822602	GACCCGTATTGTCTCCAGATTAAAGAGTCTCACTCTGTTTCCCAGGCTGGAGTTCTGTGG	intergenic							64.6059	31.9379	6.15509	4.77378	66.3574	56.3455	71.1149	45.1074	35.476	24.1246	23.0434	6.1838	5.96873	6.31276	4.25169	4.45227	5.33911	5.05205
ASHG19A3A011811	8.50271e-06	3.91703	up	noncoding	ENST00000413308	AC008753.2	Ensembl	775	chr19	-	54275759	54276534	GTTAAAAAGATAAAGGACCGTTTACCTCTTGCTGTGGTGGGTAGTGATATTATCACTGAA	intergenic							4666.72	1026.15	12.0492	10.0794	4651.76	4934.72	4413.68	978.812	1042.93	1057.06	1025.8	12.0191	12.1153	12.0132	10.0222	10.1435	10.0096	10.1424
ASHG19A3A023605	0.000206733	2.39215	up	noncoding	ENST00000469911	RP11-646E18.1	Ensembl	741	chr3	+	182328461	182329202	ATTTGCTTGGAAGACCTCATTCATGAAATTGCGCTCCCAGGGAAGCATTTCCAGGAGATT	intergenic							1574.94	589.07	10.4952	9.23685	1501.02	1714.25	1509.56	573.79	616.598	568.099	597.794	10.4121	10.5948	10.4785	9.19588	9.20078	9.19496	9.35578
ASHG19A3A039951	0.00681458	7.95415	up	noncoding	ENST00000433928	RP11-266I3.5	Ensembl	531	chrX	-	55204639	55205170	TGTTTCTTCTATCTTAGGGGCCATTAACTTTATTACCACAATGACTCTTTTTTCACTAGG	intergenic							602.037	87.7375	9.18299	6.19128	544.846	672.254	589.011	33.3454	92.6041	105.449	119.551	9.03955	9.32397	9.18545	6.74722	6.65038	4.88042	6.48709
ASHG19A3A031336	0.00058878	2.02107	up	noncoding	ENST00000432375	HNRPA1P2	Ensembl	960	chr6	+	32292995	32293955	ATACTTTGCCAAACCATGAAACCAAAGTGGCTATTGTGGTTCCAGTAGCAGCAGTAGCTA	intronic antisense	NM_006781	C6orf10	chromosome 6 open reading frame 10	-	32260474	32339656	3347.87	1409.26	11.5669	10.5518	3027.37	3703.64	3312.59	1296.55	1392.54	1478.47	1469.5	11.4068	11.699	11.595	10.56	10.6312	10.4329	10.5832
ASHG19A3A052407	3.73143e-05	6.18049	up	noncoding	ENST00000454246	RP11-216N14.1	Ensembl	752	chr1	-	153689778	153690823	TCTGAGTAATTGGTTTGGAGAAAGAGACTTTACTTTGGATTTGAGAAGATGGCTTTATGT	intergenic							538.712	91.1882	9.03476	6.40704	564.771	543.323	508.042	91.99	95.4127	87.6833	89.6668	9.08384	9.03112	8.98931	6.30889	6.37191	6.41473	6.53262
ASHG19A3A046191	0.000356973	4.05116	up	noncoding	NR_026541	LOC494141	RefSeq_NR	2093	chr11	+	18230684	18233054	CCCCTTGAGTAGGAGTTGGTCATATTCAAGCATCCTGTTCTCTTAAAACTCTCCTTTTAA	intergenic							638.022	159.538	9.26211	7.24378	679.276	655.857	578.932	179.209	157.782	141.752	159.408	9.33957	9.28601	9.16074	7.1796	7.09264	7.41088	7.29199
ASHG19A3A045568	1.35543e-05	2.49645	up	noncoding	ENST00000393311	AP001102.1	Ensembl	426	chr11	-	86969890	86970318	TAGATGAGACCTGGTCGGAGAGACTATGGGGCCTGATGGAGATGTTTCCGAAGAGGGTCC	intronic antisense	NM_022918	TMEM135	transmembrane protein 135 isoform 1	+	86748885	87039876	176.871	80.3646	7.53889	6.21902	183.975	177.463	169.174	80.8661	78.4598	76.0524	86.08	7.58466	7.52964	7.50239	6.24841	6.16465	6.22272	6.24027
ASHG19A3A045568	1.35543e-05	2.49645	up	noncoding	ENST00000393311	AP001102.1	Ensembl	426	chr11	-	86969890	86970318	TAGATGAGACCTGGTCGGAGAGACTATGGGGCCTGATGGAGATGTTTCCGAAGAGGGTCC	intronic antisense	NM_001168724	TMEM135	transmembrane protein 135 isoform 2	+	86748885	87039876	176.871	80.3646	7.53889	6.21902	183.975	177.463	169.174	80.8661	78.4598	76.0524	86.08	7.58466	7.52964	7.50239	6.24841	6.16465	6.22272	6.24027
ASHG19A3A031052	2.57839e-05	2.54828	up	noncoding	AL117559		misc_RNA	1654	chr6	+	22221009	22222616	TCAAACGCTAATCCAAGTTCCCTGCAAAACCTGTTCTGTTTTATATAACATTTACTCGTT	intergenic							659.169	254.937	9.31151	7.96199	679.73	642.587	655.19	254.523	245.514	256.449	263.262	9.34079	9.25689	9.33685	7.94575	7.99215	7.94524	7.9648
ASHG19A3A026236	0.0120496	3.00463	up	noncoding	ENST00000515543	RP11-815N9.3	Ensembl	389	chr4	+	159947290	159947679	ATTCATGGTAGACTGTGTCATGAACAATGTCACCTGTTCTCAGATCTATAAAAAAGTAGA	intronic antisense	NM_152543	C4orf45	hypothetical protein LOC152940	-	159814683	159956333	433.719	160.713	8.75409	7.16691	465.112	414.052	421.993	193.426	82.4615	149.34	217.624	8.83783	8.67906	8.74539	7.65089	7.17438	7.52555	6.3168
ASHG19A3A034426	3.41366e-05	2.79682	up	noncoding	ENST00000419271	RP11-340I6.6	Ensembl	1356	chr7	+	63353663	63355019	GGAACTTCTCCGAAAATATGTATTGGCAAGTCAAGAACAACAGATGAATGAAATAGTTAC	intergenic							207.874	83.6428	7.75708	6.2733	217.563	214.866	191.193	77.1107	80.9114	81.4563	95.093	7.80976	7.78964	7.67185	6.39377	6.26422	6.14794	6.28727
ASHG19A3A034657	0.00481949	2.25313	up	noncoding	NR_024549	DMTF1	RefSeq_NR	4012	chr7	+	86781676	86825646	CTGCCCACAACTTCCAAACCAGTCAAATGGGAAGAAGAAGAATGAAGAATAAATGATGAA	exon sense-overlapping	NM_001142326	DMTF1	cyclin-D-binding Myb-like transcription factor 1	+	86781676	86825648	65.2126	36.0199	6.17356	5.00163	70.4842	62.257	62.8965	28.1861	39.667	40.2436	35.9828	6.27274	6.1022	6.14574	4.94154	5.21813	4.62961	5.21724
ASHG19A3A034657	0.00481949	2.25313	up	noncoding	NR_024549	DMTF1	RefSeq_NR	4012	chr7	+	86781676	86825646	CTGCCCACAACTTCCAAACCAGTCAAATGGGAAGAAGAAGAATGAAGAATAAATGATGAA	exon sense-overlapping	NM_001142327	DMTF1	cyclin-D-binding Myb-like transcription factor 1	+	86781676	86825648	65.2126	36.0199	6.17356	5.00163	70.4842	62.257	62.8965	28.1861	39.667	40.2436	35.9828	6.27274	6.1022	6.14574	4.94154	5.21813	4.62961	5.21724
ASHG19A3A034657	0.00481949	2.25313	up	noncoding	NR_024549	DMTF1	RefSeq_NR	4012	chr7	+	86781676	86825646	CTGCCCACAACTTCCAAACCAGTCAAATGGGAAGAAGAAGAATGAAGAATAAATGATGAA	natural antisense	NM_024315	C7orf23	transmembrane protein C7orf23	-	86825477	86849031	65.2126	36.0199	6.17356	5.00163	70.4842	62.257	62.8965	28.1861	39.667	40.2436	35.9828	6.27274	6.1022	6.14574	4.94154	5.21813	4.62961	5.21724
ASHG19A3A034657	0.00481949	2.25313	up	noncoding	NR_024549	DMTF1	RefSeq_NR	4012	chr7	+	86781676	86825646	CTGCCCACAACTTCCAAACCAGTCAAATGGGAAGAAGAAGAATGAAGAATAAATGATGAA	exon sense-overlapping	NM_021145	DMTF1	cyclin-D-binding Myb-like transcription factor 1	+	86781869	86825648	65.2126	36.0199	6.17356	5.00163	70.4842	62.257	62.8965	28.1861	39.667	40.2436	35.9828	6.27274	6.1022	6.14574	4.94154	5.21813	4.62961	5.21724
ASHG19A3A025526	0.00126729	7.19822	up	noncoding	ENST00000510278	RP11-571I18.2	Ensembl	224	chr4	+	54942791	54943015	GATTCCATGAAAGATTTTGAGGAGGTGAAGAGGGCTGGTACCTTTCAGAGTGCAAAGTGA	intergenic							1542.8	209.516	10.4669	7.61929	1631.78	1386.81	1609.81	232.28	271.287	196.741	137.756	10.5286	10.3029	10.5692	6.963	7.5886	7.80577	8.11977
ASHG19A3L0000765	0.0413458	2.32489	up	noncoding	AI734132	lincRNA-RGS6-1	lincRNA	438	chr14	-	73058669	73059107	ATTCATCTTTGTCTTGGACATTTTGGATGACTCTCCCCTCCTGGGACTAGAGACAAACTG	intergenic							4240.34	1669.56	11.9088	10.6916	4278.83	4584.42	3857.77	2887.68	1362.99	1091.39	1336.2	11.8972	12.0162	11.813	10.4241	10.194	11.6033	10.5452
ASHG19A3A052711	0.000285534	2.29295	up	noncoding	AK095096		misc_RNA	3662	chr15	+	31061534	31065196	TCACCTTAAATGTTTCTGCCTGGCTATTATTAACTGGAGTGCAATATGTTTTTGGTTCTT	intergenic							1928.58	745.247	10.7919	9.59471	1993.61	1997.29	1794.85	796.05	715.061	734.146	735.729	10.821	10.8274	10.7273	9.51129	9.59127	9.69579	9.5805
CUST_465_PI426073487	0.0257033	2.10396	up	noncoding	uc.467+	uc.467	UCR	731	chrX	+	25008353	25009084	TTGCTCTCATTCAGCCACTTCACAAAAAATTATTTTATTCCATCTCTCAGTGATGATGAC	intron sense-overlapping	NM_016937	POLA1	DNA polymerase alpha catalytic subunit	+	24712063	25015102	43.6951	27.3513	5.59083	4.51772	46.4327	30.8713	53.7811	41.1051	27.2671	23.9722	17.0607	5.67976	5.16525	5.92747	3.77598	4.44267	5.19636	4.65588
ASHG19A3A041679	2.27554e-05	2.0325	up	noncoding	U66048		NRED	2959	chrX	+	149128983	149131935	AAGAAGTGTACTCACACTGCCCCAACACCAGTGAGTGGAAATATTTATAGGTCTCTCATT	intergenic							508.922	251.039	8.96319	7.93994	511.224	506.045	509.498	264.645	250.092	236.852	252.566	8.95734	8.93989	8.99235	7.88528	7.87363	8.00616	7.99467
ASHG19A3A024753	0.0018942	8.93773	up	noncoding	ENST00000514575	RP11-327I3.1	Ensembl	187	chr4	-	138222154	138222341	TGAGCTCATGCAACAAAAGCAGAAGGCAGCTAATGAGAAGTCTATGCAGACAAAAGAAAA	intergenic							1797.11	202.648	10.6875	7.5276	1735.88	1843.58	1811.87	214.771	105.407	257.583	232.829	10.6117	10.7099	10.741	7.75475	7.9987	7.67818	6.67878
ASHG19A3A034992	0.0015204	2.56064	up	noncoding	AK092254		misc_RNA	2969	chr1	+	171711280	171714249	TTCCTCTAACAGGATGTCCCAGGGCTGGGATTGTTTATGGTAAACACATTAAGAATCGAT	natural antisense	NM_003762	VAMP4	vesicle-associated membrane protein 4 isoform 1	-	171669295	171711379	88.8736	42.2772	6.60302	5.24652	86.7027	90.8256	89.0925	35.3081	48.0138	45.6799	40.1067	6.55738	6.62115	6.63054	5.10228	5.40908	4.96874	5.50597
ASHG19A3A034992	0.0015204	2.56064	up	noncoding	AK092254		misc_RNA	2969	chr1	+	171711280	171714249	TTCCTCTAACAGGATGTCCCAGGGCTGGGATTGTTTATGGTAAACACATTAAGAATCGAT	natural antisense	NM_001185127	VAMP4	vesicle-associated membrane protein 4 isoform 2	-	171669295	171711379	88.8736	42.2772	6.60302	5.24652	86.7027	90.8256	89.0925	35.3081	48.0138	45.6799	40.1067	6.55738	6.62115	6.63054	5.10228	5.40908	4.96874	5.50597
ASHG19A3A019861	0.000702059	2.13936	up	noncoding	ENST00000448085	HMGN2L10	Ensembl	265	chr22	-	42105228	42105493	ATAAAGCCAAGGTGAAGGACGAACCACAGAGAAGATCCACAAGGTTGTCTGCAAAATCTG	intronic antisense	NM_152513	MEI1	meiosis inhibitor protein 1	+	42095517	42195459	4219.25	1676.96	11.896	10.7988	3944.64	4716.91	3996.2	1510.78	1730.46	1686.91	1779.69	11.7754	12.0502	11.8623	10.8334	10.8195	10.6585	10.8838
ASHG19A3A049738	0.0016777	2.51093	up	noncoding	ENST00000299197	RP11-477B16.3	Ensembl	1822	chr13	-	95409704	95411526	GGCTCACACACTGAAAGTAGTAAACTTTGGCGCTCCAGTTGAAGTTTTTGACTCTGAAGA	intergenic							903.209	346.686	9.73677	8.40855	931.369	959.195	819.062	397.019	261.02	379.862	348.842	9.76299	9.8043	9.64301	8.36707	8.58132	8.62457	8.06123
CUST_323_PI426073487	0.0278614	4.22713	up	noncoding	uc.325+	uc.325	UCR	235	chr11	+	31685643	31685878	AGTAGATGATTTAAAACGTGTTCCCAAGATAAACTTTCCCATTGTCATTAATGAGGATGG	intron sense-overlapping	NM_019040	ELP4	elongator complex protein 4	+	31531296	31805329	38.6571	14.1179	5.43784	3.35816	44.6961	40.339	30.9363	24.3684	5	7.52573	19.5775	5.62405	5.52034	5.16912	3.99017	2.70624	4.40495	2.33128
CUST_2_PI426265844	0.016344	2.98053	up	noncoding	AK023948	AK023948	lncRNAdb	2807	chr8	+	134067203	134070012	CAAGTCCTGCTTCCTTTTGTAGGTTTAAGACATTAGTTCCTGAGAAATTGACTAATCAAG	intronic antisense	NM_001045556	SLA	src-like-adapter isoform a	-	134048972	134115310	180.628	75.0992	7.57038	5.99481	190.334	170.757	180.794	134.274	57.2002	54.1476	54.7747	7.63545	7.47839	7.59731	5.57255	5.6645	6.97002	5.77218
CUST_2_PI426265844	0.016344	2.98053	up	noncoding	AK023948	AK023948	lncRNAdb	2807	chr8	+	134067203	134070012	CAAGTCCTGCTTCCTTTTGTAGGTTTAAGACATTAGTTCCTGAGAAATTGACTAATCAAG	intron sense-overlapping	NM_003235	TG	thyroglobulin precursor	+	133879204	134147143	180.628	75.0992	7.57038	5.99481	190.334	170.757	180.794	134.274	57.2002	54.1476	54.7747	7.63545	7.47839	7.59731	5.57255	5.6645	6.97002	5.77218
CUST_2_PI426265844	0.016344	2.98053	up	noncoding	AK023948	AK023948	lncRNAdb	2807	chr8	+	134067203	134070012	CAAGTCCTGCTTCCTTTTGTAGGTTTAAGACATTAGTTCCTGAGAAATTGACTAATCAAG	intronic antisense	NM_001045557	SLA	src-like-adapter isoform b	-	134048972	134115310	180.628	75.0992	7.57038	5.99481	190.334	170.757	180.794	134.274	57.2002	54.1476	54.7747	7.63545	7.47839	7.59731	5.57255	5.6645	6.97002	5.77218
CUST_2_PI426265844	0.016344	2.98053	up	noncoding	AK023948	AK023948	lncRNAdb	2807	chr8	+	134067203	134070012	CAAGTCCTGCTTCCTTTTGTAGGTTTAAGACATTAGTTCCTGAGAAATTGACTAATCAAG	intronic antisense	NM_006748	SLA	src-like-adapter isoform c	-	134048972	134072603	180.628	75.0992	7.57038	5.99481	190.334	170.757	180.794	134.274	57.2002	54.1476	54.7747	7.63545	7.47839	7.59731	5.57255	5.6645	6.97002	5.77218
ASHG19A3A007691	0.00252479	3.05413	up	noncoding	NR_029427	WDR13	RefSeq_NR	2116	chrX	+	48455879	48463582	AGCAAGTCTTAGCAGTGGACGCGAGTTTCGGACGCAGTATATCCGCCGGCGCAGCCAGCT	exon sense-overlapping	NM_001166426	WDR13	WD repeat-containing protein 13 isoform 2	+	48456223	48463582	59.2149	24.8715	6.03683	4.42606	64.5283	57.5484	55.568	17.6185	28.1667	24.0774	29.6236	6.14067	5.99606	5.97374	4.64117	4.44941	3.90604	4.70764
ASHG19A3A007691	0.00252479	3.05413	up	noncoding	NR_029427	WDR13	RefSeq_NR	2116	chrX	+	48455879	48463582	AGCAAGTCTTAGCAGTGGACGCGAGTTTCGGACGCAGTATATCCGCCGGCGCAGCCAGCT	exon sense-overlapping	NM_017883	WDR13	WD repeat-containing protein 13 isoform 1	+	48455879	48463582	59.2149	24.8715	6.03683	4.42606	64.5283	57.5484	55.568	17.6185	28.1667	24.0774	29.6236	6.14067	5.99606	5.97374	4.64117	4.44941	3.90604	4.70764
ASHG19A3A023592	3.97329e-05	6.52558	up	noncoding	ENST00000420887	RP11-259P15.3	Ensembl	1069	chr3	+	180538331	180539400	TCATGAAGTGTGACATGGACATTTGCAAAGACCTCTACACCAATGCAGTACTGTCCAGTG	intergenic							192.612	34.7996	7.65685	4.95075	198.263	182.406	197.169	39.4756	31.0697	29.3052	39.3479	7.69053	7.56822	7.71181	5.07081	4.74144	5.13613	4.8546
ASHG19A3A050401	0.000496776	2.70405	up	noncoding	ENST00000456305	RP4-655N15.3	Ensembl	504	chr1	-	117317741	117318245	ACATTACCTCAATGAACCAGTGAAATCCATCAAAGAATTGGGTGTCCACGTGACCAACTT	intergenic							12988.5	3900.42	13.4695	12.0344	13710.8	11748.5	13506.3	3991.2	3691.48	4100.05	3818.97	13.5254	13.318	13.5651	11.9479	12.1197	12.0752	11.9946
ASHG19A3A023710	2.69521e-05	11.9626	up	noncoding	ENST00000397646	RP11-332P22.2	Ensembl	1209	chr3	+	190548753	190549962	ACAAAGCTAAAAGAAGAGCTCATTGATGCAATCAGGCAGACACTGAGCAAGTCAAATACT	intergenic							1450.76	118.212	10.376	6.79556	1558.92	1541.86	1251.5	118.54	116.217	120.98	117.111	10.4601	10.4516	10.2164	6.71345	6.85839	6.78085	6.82955
ASHG19A3L0000050	0.00394554	2.56252	up	noncoding	BG679513	lincRNA-KCNT2-2	lincRNA	868	chr1	+	193254821	193255677	GTTGATGGTGTTGAACTTTAATCTCAGGATTAATAACTGTTAAATAGAAGCGTGGCATGA	intergenic							145.254	65.3362	7.26343	5.90587	156.479	156.697	122.586	70.3114	69.2784	56.0553	65.6996	7.36227	7.36294	7.06509	5.84428	5.71394	6.00619	6.05907
ASHG19A3A012904	0.0413377	3.05602	up	noncoding	ENST00000423792	RP11-478H16.1	Ensembl	656	chr1	-	236449275	236450260	GTCTGGAGAGTCTCTGGCTGAGGGTCCACCAAAATATGCAAAATCTGTTCTAAAAACATG	intergenic							39.1754	18.7687	5.4428	3.83114	51.7274	34.9233	30.8754	32.838	13.4504	8.72274	20.0635	5.82983	5.33213	5.16643	4.02943	2.88204	4.85793	3.55517
ASHG19A3A026632	0.00174343	4.30693	up	noncoding	ENST00000512933	CTD-2057J6.2	Ensembl	535	chr5	-	29848790	29849325	AAAGACCAAGAAAAAATGGTCTAAAAGCGTAATTAGTTCCAGTAGCAGTAGCAGTGACAG	intergenic							57.721	17.8064	6.00229	3.89563	54.1915	59.8994	59.072	20.99	19.6195	18.6901	11.9258	5.89878	6.04841	6.05969	3.18773	4.056	4.17537	4.16342
ASHG19A3A016865	0.00023374	9.91096	up	noncoding	ENST00000458609	AC007679.1	Ensembl	504	chr2	+	206813814	206814871	AAGATTCCAAAGACGGCAGAAAACTTTCACTCCTGAGCACTGGAGAGAAAGGATTTGGTT	intergenic							177.965	22.1134	7.5481	4.23908	168.841	172.447	192.608	30.3377	17.9881	21.1443	18.9835	7.47048	7.49238	7.68144	3.94122	4.24562	4.74084	4.02864
ASHG19A3A039576	7.10163e-05	2.03856	up	noncoding	ENST00000436419	RP11-66N5.2	Ensembl	2081	chrX	-	8948465	8950546	AAGAAGCAGGGCATCTCCTGGGGAGGCTCAATCTCTGTCCAGGTCAATTCTATTAATTTT	intergenic							1897.02	822.299	10.7681	9.74052	1899.43	1905.27	1886.35	811.199	826.861	850.31	800.827	10.7432	10.7612	10.7998	9.6391	9.80258	9.72557	9.79483
ASHG19A3A038606	0.000258525	3.01744	up	noncoding	uc004acc.3	LOC554249	UCSC_knowngene	1352	chr9	+	42018943	42020410	CTTTCTAGATCAAATGCTGTTTTCCATGACTGTCTCTGTTCTTCCCATACGCGAATGGCA	intergenic							4033.79	1151.7	11.8374	10.2441	4167.47	4075.9	3857.99	1122.75	1223.87	988.198	1271.99	11.8623	11.8364	11.8135	10.3494	10.0367	10.2156	10.3747
ASHG19A3A044568	0.000296315	3.76729	up	noncoding	ENST00000454541	RP11-179H18.5	Ensembl	627	chr10	+	121397967	121398594	ATTCAGAAGAAATACGATGAAAGGGAAAAGAATGCCAAAATCAGCCGTCTCCTGGGGGAG	intergenic							5359.29	1215.37	12.2409	10.3274	5440.76	4916.57	5720.53	1060.72	1365.83	1092.39	1342.55	12.2434	12.1092	12.3703	10.4322	10.1953	10.1327	10.5495
ASHG19A3A022876	0.000189185	2.1035	up	noncoding	ENST00000485383	RP11-598F17.1	Ensembl	1386	chr3	+	96068397	96069783	CCAGATACAGAATGCACAGTATTTGCTGCAGAACAGTGTGAAGCAGTGTGCAGATGTTGA	intergenic							30047.7	11132.9	14.6646	13.5918	30129.1	31550.4	28463.6	11149.4	11111.5	10624.7	11646	14.6345	14.7302	14.629	13.5966	13.5277	13.6083	13.6345
ASHG19A3A041283	8.64975e-05	9.09686	up	noncoding	ENST00000448218	RP13-75G22.1	Ensembl	1435	chrX	+	97161641	97163076	CTATGGAGAGCCAATCATTACGAGTCTTTACACAAATTGGTATTTGGAAACTTTGTTAAG	intergenic							1583.98	168.785	10.5051	7.31969	1666.29	1570.57	1515.1	187.74	169.858	131.853	185.688	10.5532	10.4802	10.4817	7.40945	6.98804	7.48004	7.4012
ASHG19A3A040525	0.000152141	2.13448	up	noncoding	AK025525		misc_RNA	2225	chrX	-	150574867	150577076	CAAGTCAATTGGTTGTTTCTTTTGGCAAAGCTGATGACATTTTCATGATGAAAATGTTCC	natural antisense	NM_001017980	VMA21	vacuolar ATPase assembly integral membrane	+	150565656	150577836	282.404	142.337	8.16958	7.0757	296.951	276.09	274.17	134.741	139.391	146.017	149.197	8.2274	8.12396	8.15738	7.08308	7.14051	6.97529	7.10391
ASHG19A3A000426	0.000149441	2.21692	up	noncoding	ENST00000501177	AC108084.1	Ensembl	628	chr16	-	54952843	54962463	CGGCTTTCCGGAGTAGAGCCCTTGGAGGTGTTAAGTGTGATGCTTCCATAATACATTTGG	intergenic							921.726	395.237	9.7674	8.61885	948.87	943.488	872.819	360.924	395.396	415.031	409.596	9.79127	9.78011	9.73082	8.60911	8.71795	8.48033	8.668
ASHG19A3A021430	0.00133305	3.33226	up	noncoding	BC030754		misc_RNA	1129	chr3	-	113432184	113433267	GATTTAACGTATGCATTTAAAAGGACAAAAATTCTGCATTAAGAACTTGGGAGAGGGGTT	intergenic							618.237	189.492	9.22505	7.48855	647.001	607.837	599.872	141.567	192.614	210.457	213.331	9.27597	9.1857	9.21349	7.6227	7.69249	7.04873	7.59029
ASHG19A3A023273	0.0338168	2.01386	up	noncoding	ENST00000485881	RP11-598P12.1	Ensembl	1943	chr3	+	137599136	137601079	TGAGTGTGCCATGACCAAGGATAACAACTGTTTGGCAAGTTTGAACTCACAGGCATACCT	intergenic							16303.7	6781.21	13.7946	12.7847	16439.6	16172.8	16298.9	3774.94	7566.39	7924.35	7859.15	13.778	13.7774	13.8285	13.0025	13.0871	11.9908	13.0583
ASHG19A3A040772	0.00114917	2.11534	up	noncoding	ENST00000397569	RP1-258N20.3	Ensembl	687	chrX	+	25047661	25048352	CAGCCACAGGCCAAAATCATTGTATTTGATCTGTTACCTCAAGGTGAGAAACCCAACCCT	intergenic							33.8825	21.1443	5.2634	4.18251	39.121	28.0823	34.4443	22.8525	17.1683	18.1252	26.4313	5.43806	5.04134	5.31079	4.46192	4.00626	4.3072	3.95465
ASHG19A3A041657	0.000120447	12.5584	up	noncoding	ENST00000458303	RP11-434J24.2	Ensembl	298	chrX	+	146882522	146882820	AGAATGCACTATAACAGGAAAATCATATTATAGATGGAGTAAAGCTCCAGATTGGAGCTC	intergenic							4763.35	350.18	12.0726	8.42202	5425.6	4378.1	4486.35	273.954	343.807	393.243	389.715	12.2397	11.9454	12.0328	8.53426	8.63195	8.05595	8.4659
ASHG19A3A007547	0.000290293	19.0519	up	noncoding	NR_027639	ADAM9	RefSeq_NR	3912	chr8	+	38854504	38962777	ACGAAGGCACAAAATGTGGTGCTGGAAAGAAATGAATACTGCATTGAGGGACGGACTTCT	exon sense-overlapping	NM_003816	ADAM9	disintegrin and metalloproteinase	+	38854504	38962779	279.391	18.0699	8.15131	3.89945	307.865	271.18	259.129	23.545	11.4137	16.7378	20.583	8.27824	8.10012	8.07558	4.06919	3.88049	4.35246	3.29565
ASHG19A3A007547	0.000290293	19.0519	up	noncoding	NR_027639	ADAM9	RefSeq_NR	3912	chr8	+	38854504	38962777	ACGAAGGCACAAAATGTGGTGCTGGAAAGAAATGAATACTGCATTGAGGGACGGACTTCT	bidirectional	NM_031940	TM2D2	TM2 domain-containing protein 2 isoform b	-	38846326	38854041	279.391	18.0699	8.15131	3.89945	307.865	271.18	259.129	23.545	11.4137	16.7378	20.583	8.27824	8.10012	8.07558	4.06919	3.88049	4.35246	3.29565
ASHG19A3A007547	0.000290293	19.0519	up	noncoding	NR_027639	ADAM9	RefSeq_NR	3912	chr8	+	38854504	38962777	ACGAAGGCACAAAATGTGGTGCTGGAAAGAAATGAATACTGCATTGAGGGACGGACTTCT	bidirectional	NM_001024380	TM2D2	TM2 domain-containing protein 2 isoform b	-	38846326	38854041	279.391	18.0699	8.15131	3.89945	307.865	271.18	259.129	23.545	11.4137	16.7378	20.583	8.27824	8.10012	8.07558	4.06919	3.88049	4.35246	3.29565
ASHG19A3A007547	0.000290293	19.0519	up	noncoding	NR_027639	ADAM9	RefSeq_NR	3912	chr8	+	38854504	38962777	ACGAAGGCACAAAATGTGGTGCTGGAAAGAAATGAATACTGCATTGAGGGACGGACTTCT	bidirectional	NM_001024381	TM2D2	TM2 domain-containing protein 2 isoform b	-	38846326	38854041	279.391	18.0699	8.15131	3.89945	307.865	271.18	259.129	23.545	11.4137	16.7378	20.583	8.27824	8.10012	8.07558	4.06919	3.88049	4.35246	3.29565
ASHG19A3A007547	0.000290293	19.0519	up	noncoding	NR_027639	ADAM9	RefSeq_NR	3912	chr8	+	38854504	38962777	ACGAAGGCACAAAATGTGGTGCTGGAAAGAAATGAATACTGCATTGAGGGACGGACTTCT	bidirectional	NM_078473	TM2D2	TM2 domain-containing protein 2 isoform a	-	38846326	38854041	279.391	18.0699	8.15131	3.89945	307.865	271.18	259.129	23.545	11.4137	16.7378	20.583	8.27824	8.10012	8.07558	4.06919	3.88049	4.35246	3.29565
ASHG19A3A051223	0.000311609	2.31494	up	noncoding	uc001vvl.3	AK022914	UCSC_knowngene	2391	chr14	+	19650031	19692914	GGATCCAGAGTTCAGCAGACCTTGAGACAATGAAAACAAACTTAGTAATAATCATTTTTC	intergenic							707.882	296.697	9.40337	8.1924	763.351	707.965	652.329	283.682	288.264	317.458	297.384	9.48795	9.39133	9.33083	8.1325	8.31984	8.11064	8.20661
ASHG19A3A017818	6.96054e-06	4.15333	up	noncoding	ENST00000497904	SUMO1P1	Ensembl	306	chr20	-	52491790	52492096	ATGGAGGAAGAAGATGTGATTGAGGTTTATCAGGAACAAATCGGAGGTCATTCAACAGTT	intergenic							5522.67	1135.81	12.2854	10.2311	5758.71	5459.86	5349.43	1082.58	1123.16	1158.53	1178.96	12.3239	12.2628	12.2694	10.2281	10.281	10.1639	10.2514
ASHG19A3A024113	0.0444472	2.68345	up	noncoding	ENST00000506803	OR5M14P	Ensembl	618	chr4	-	41724554	41725529	ATATATGGCTTTGCAAACTATCTGGCACAGACCATCCGGATGCTTCTTCTGTCCTTCTGA	intergenic							30.2136	17.344	5.08256	3.65848	36.9812	20.0288	33.6308	32.0374	20.0659	7.43478	9.83813	5.36046	4.6084	5.27883	2.91382	2.69454	4.8251	4.20044
ASHG19A3A019178	0.00166295	3.59375	up	noncoding	AF003738		NRED	1402	chr21	+	35017933	35019291	CATAAAAATAAATACGGGTTTCTGTCACCTCGCTTCAGAATCAGACAGCTAGAGGTGGGG	intron sense-overlapping	NM_001001132	ITSN1	intersectin-1 isoform ITSN-s	+	35014783	35210802	125.305	41.9816	7.06873	5.22324	131.932	127.045	116.937	54.6295	39.8851	34.6262	38.7856	7.12999	7.07685	6.99936	5.05	4.99165	5.62565	5.22567
ASHG19A3A019178	0.00166295	3.59375	up	noncoding	AF003738		NRED	1402	chr21	+	35017933	35019291	CATAAAAATAAATACGGGTTTCTGTCACCTCGCTTCAGAATCAGACAGCTAGAGGTGGGG	intron sense-overlapping	NM_003024	ITSN1	intersectin-1 isoform ITSN-l	+	35014783	35261609	125.305	41.9816	7.06873	5.22324	131.932	127.045	116.937	54.6295	39.8851	34.6262	38.7856	7.12999	7.07685	6.99936	5.05	4.99165	5.62565	5.22567
ASHG19A3A021442	9.35563e-05	2.54172	up	noncoding	AK022228		misc_RNA	2351	chr3	-	114053747	114056098	AGAAAATAATTGGAACACATGGATCTGTTACAATTCTACACAGGGGGAAACAAGCTAAGC	intergenic							322.403	136.172	8.35241	7.00661	339.058	322.565	305.586	126.673	138.499	128.383	151.132	8.41272	8.33668	8.30784	7.10265	6.94467	6.88553	7.0936
ASHG19A3A029346	0.00677226	2.11477	up	noncoding	ENST00000415144	RP3-406P24.3	Ensembl	209	chr6	-	4019076	4021449	AATGCTAGAAATGGACGTTTAGTTATTGAATCCCGCTAACGAGGGGAGCCAACAAGAGAG	bidirectional	NM_003913	PRPF4B	serine/threonine-protein kinase PRP4 homolog	+	4021568	4065217	24.0852	15.7512	4.80041	3.71991	23.6949	26.0914	22.4694	18.5058	13.5874	13.1019	17.8098	4.7344	4.94243	4.72442	3.84274	3.47944	3.98366	3.57381
ASHG19A3A049666	0.00327334	3.32159	up	noncoding	ENST00000413857	RP11-512C24.1	Ensembl	481	chr13	-	74951299	74952088	AGCGAATTAATATACATGTTCAGCATTTTAAGCACTTGAAGAGCCAAGATAGCATCCTGA	intergenic							34.6938	14.2032	5.20139	3.46952	54.9498	19.6402	29.4915	14.7846	14.9698	5	22.0585	5.9167	4.58399	5.10349	4.18279	2.32995	3.62765	3.73769
ASHG19A3A049822	0.025128	3.28574	up	noncoding	ENST00000328558	RP11-282A11.1	Ensembl	471	chr13	-	107516163	107516634	TTTTACCTGCACTGCTAAGACCGAGTGGTTCGGCAAGGTGAAAGAACGCATGATTATTGT	intergenic							142.394	54.3475	7.23197	5.51575	140.325	119.885	166.971	24.6741	73.1707	54.7285	64.8167	7.21575	6.99671	7.48345	5.82543	5.67816	4.42474	6.13469
ASHG19A3A022337	0.00116333	2.40113	up	noncoding	ENST00000421404	AC105765.1	Ensembl	1227	chr3	+	18580164	18581391	CAGCAACAACTACAGCAAGTTCTGGAACATCCCCTTGAATTTTTATGGAATCAGCCTCAG	intergenic							284.099	127.959	8.16957	6.90585	263.454	325.514	263.33	103.111	131.094	139.338	138.294	8.06231	8.34852	8.09786	6.96734	7.06756	6.57879	7.00972
ASHG19A3A046981	0.0036809	2.30859	up	noncoding	ENST00000439104	AP006216.10	Ensembl	419	chr11	+	116644104	116644921	GGTGCAAGAGGTCATCCAAATTTCTTGAAATACCAGATCTTTTTACCTCATCATATATGT	bidirectional	NM_001159736	BUD13	BUD13 homolog isoform 2	-	116618885	116643714	68.8539	37.4347	6.24818	5.04117	72.5293	64.5136	69.5187	42.8233	41.9641	25.4088	39.5425	6.31298	6.15006	6.28151	5.07882	4.52743	5.25589	5.30252
ASHG19A3A046981	0.0036809	2.30859	up	noncoding	ENST00000439104	AP006216.10	Ensembl	419	chr11	+	116644104	116644921	GGTGCAAGAGGTCATCCAAATTTCTTGAAATACCAGATCTTTTTACCTCATCATATATGT	bidirectional	NM_032725	BUD13	BUD13 homolog isoform 1	-	116618885	116643714	68.8539	37.4347	6.24818	5.04117	72.5293	64.5136	69.5187	42.8233	41.9641	25.4088	39.5425	6.31298	6.15006	6.28151	5.07882	4.52743	5.25589	5.30252
ASHG19A3A033806	0.000920035	2.91253	up	noncoding	AY927455		RNAdb	678	chr7	-	155592733	155601766	CCAGCCTCCCTCATGACTAAATGCATATCTATTCCTGTCAAAACGTGTATCACAATGTAC	exon sense-overlapping	NM_000193	SHH	sonic hedgehog protein preproprotein	-	155595557	155604967	793.082	265.213	9.55705	8.01478	833.948	799.416	745.883	316.234	258.559	237.841	248.218	9.60379	9.55484	9.51252	7.8563	7.87825	8.27584	8.04873
ASHG19A3A009149	0.00987894	2.34142	up	noncoding	ENST00000452091	AC005517.3	Ensembl	489	chr17	+	15410179	15410668	TACAAACGGTTCCTAATTTTTCATCTGCACTGCCAAGACAGCGTGGTTGAATGGGAAGCA	intronic antisense	NM_145301	FAM18B2	hypothetical protein LOC201158 isoform 1	-	15405577	15466945	59303.6	20018.6	15.624	14.3966	60257	58708.2	58945.6	12680.5	21868.9	22991.9	22532.9	15.5998	15.6056	15.6666	14.5528	14.6397	13.7991	14.5948
ASHG19A3A009149	0.00987894	2.34142	up	noncoding	ENST00000452091	AC005517.3	Ensembl	489	chr17	+	15410179	15410668	TACAAACGGTTCCTAATTTTTCATCTGCACTGCCAAGACAGCGTGGTTGAATGGGAAGCA	intronic antisense	NM_001204478	FAM18B2-CDRT4	hypothetical protein LOC100533496	-	15339331	15466945	59303.6	20018.6	15.624	14.3966	60257	58708.2	58945.6	12680.5	21868.9	22991.9	22532.9	15.5998	15.6056	15.6666	14.5528	14.6397	13.7991	14.5948
ASHG19A3A007145	0.000545669	3.17654	up	noncoding	NR_033358	MEG3	RefSeq_NR	1735	chr14	+	101292444	101327358	ACTCCGTGGAAGCACGCTCACAAAGGGCTAATCTCGGGCCTTGTCGAAGGAAGAGGCTGC	intergenic							40.0733	16.7064	5.49856	3.8311	45.3291	34.2534	40.6376	17.5884	18.5251	14.67	16.0421	5.64737	5.30385	5.54445	3.67452	3.66931	3.9034	4.07716
ASHG19A3A014361	4.11869e-05	4.89199	up	noncoding	ENST00000415351	NF1L2	Ensembl	1461	chr2	-	131947406	131955066	AGGCAGCCCTGAACATCTAGAGCAAGCTAGCATTGAAACAATGATGTTAAATCTGGTCAG	intergenic							187.064	44.468	7.61841	5.32799	193.212	184.96	183.021	39.6703	44.4122	44.4592	49.3304	7.65523	7.58556	7.61445	5.41208	5.36878	5.14337	5.38773
ASHG19A3A024171	0.000555064	2.34654	up	noncoding	ENST00000473096	RP11-61F5.1	Ensembl	294	chr4	-	52844244	52844538	TAACACCACTTCCACCATCACAGTAAAGTTGCCATCAGAAGACTGAAGGAGTTGGAAGAC	intergenic							10193.6	3576	13.136	11.9055	9617.27	9804.81	11158.7	3303.07	3775.1	3690.19	3535.62	13.037	13.0798	13.2912	11.8364	11.9605	11.7971	12.0277
ASHG19A3A008802	2.20469e-05	3.25705	up	noncoding	AK096931		misc_RNA	2786	chr17	-	73779187	73781974	AAACTGCACGGAATCTCCTGACAGGACTTCACGTTAATCATCATTCATAGGTGGGTTCTG	natural antisense	NM_001080419	UNK	RING finger protein unkempt homolog	+	73780919	73821886	88.8046	33.3838	6.60044	4.89687	90.6032	87.1468	88.6637	33.5045	31.7065	30.4172	37.9069	6.61723	6.56017	6.6239	5.0173	4.80042	4.8877	4.88204
ASHG19A3L0002508	2.60928e-05	4.7918	up	noncoding	CN413083	lincRNA-UFC1	lincRNA	687	chr1	+	161106389	161107075	TTTTGTAAAACCTCCCAGGATGATAGTAAGAGTTGGCACAAAAAGAGGTTAATAGGTGCT	intergenic							846.103	174.856	9.64519	7.38462	787.949	950.664	799.697	161.78	169.495	182.846	185.303	9.53368	9.79194	9.60995	7.40661	7.47894	7.25463	7.39831
ASHG19A3A023336	0.000113291	2.71931	up	noncoding	ENST00000493219	RP11-80H8.5	Ensembl	1254	chr3	+	142895204	142896458	AGAAAAACATCGGAAAGTTCCAAGAGGAGGCAAACATCTATGCTGTCAAGACAGCCGTGT	intergenic							155.608	65.8306	7.36641	5.92317	166.641	154.022	146.161	62.5416	66.3414	66.2555	68.1839	7.45226	7.33898	7.30801	5.90052	5.96779	5.83049	5.99389
ASHG19A3A007628	0.0409708	2.17145	up	noncoding	NR_028100	DCAF11	RefSeq_NR	3838	chr14	+	24584491	24594450	AGGTACTGGCCTATCTCCTCCGCAGGCCCTCTTGGACTCAGAGGAAGAGAATGACAGAGC	exon sense-overlapping	NM_025230	DCAF11	DDB1- and CUL4-associated factor 11 isoform 1	+	24583985	24594451	278.042	143.24	8.13803	7.01937	273.76	313.433	246.932	209.555	137.565	89.9977	135.845	8.11114	8.29605	8.00689	6.93964	6.41329	7.64317	7.08136
ASHG19A3A007628	0.0409708	2.17145	up	noncoding	NR_028100	DCAF11	RefSeq_NR	3838	chr14	+	24584491	24594450	AGGTACTGGCCTATCTCCTCCGCAGGCCCTCTTGGACTCAGAGGAAGAGAATGACAGAGC	exon sense-overlapping	NM_181357	DCAF11	DDB1- and CUL4-associated factor 11 isoform 2	+	24584493	24594451	278.042	143.24	8.13803	7.01937	273.76	313.433	246.932	209.555	137.565	89.9977	135.845	8.11114	8.29605	8.00689	6.93964	6.41329	7.64317	7.08136
ASHG19A3A007628	0.0409708	2.17145	up	noncoding	NR_028100	DCAF11	RefSeq_NR	3838	chr14	+	24584491	24594450	AGGTACTGGCCTATCTCCTCCGCAGGCCCTCTTGGACTCAGAGGAAGAGAATGACAGAGC	exon sense-overlapping	NM_001163484	DCAF11	DDB1- and CUL4-associated factor 11 isoform 1	+	24583905	24594451	278.042	143.24	8.13803	7.01937	273.76	313.433	246.932	209.555	137.565	89.9977	135.845	8.11114	8.29605	8.00689	6.93964	6.41329	7.64317	7.08136
ASHG19A3A008259	0.000221267	2.7643	up	noncoding	AK024690		misc_RNA	1692	chr17	-	37413254	37414917	TAGCGACATTCTTTTATTACTTCTAATTGCCTTGTAAAATGCATTGTTATGGCCCGGCAC	exon sense-overlapping	NM_032875	FBXL20	F-box/LRR-repeat protein 20 isoform 1	-	37408896	37557909	122.585	52.1911	7.0402	5.57328	127.959	117.698	122.097	53.3016	50.3055	54.4328	50.7244	7.09023	6.97148	7.05888	5.45559	5.67199	5.59168	5.57387
ASHG19A3A008259	0.000221267	2.7643	up	noncoding	AK024690		misc_RNA	1692	chr17	-	37413254	37414917	TAGCGACATTCTTTTATTACTTCTAATTGCCTTGTAAAATGCATTGTTATGGCCCGGCAC	exon sense-overlapping	NM_001184906	FBXL20	F-box/LRR-repeat protein 20 isoform 2	-	37408896	37557909	122.585	52.1911	7.0402	5.57328	127.959	117.698	122.097	53.3016	50.3055	54.4328	50.7244	7.09023	6.97148	7.05888	5.45559	5.67199	5.59168	5.57387
ASHG19A3A034607	7.93049e-06	5.14682	up	noncoding	uc001gfk.1	DQ576756	UCSC_knowngene	1917	chr1	+	168218461	168220378	TCACTGCAGGCTCAGGGAGCAAGAAATAAAATCATGAAATGCATTCCAAATAAAATTACC	intergenic							427.859	89.4965	8.73875	6.37507	446.41	417.218	419.948	85.1828	91.7436	83.4873	97.5721	8.78802	8.68881	8.73941	6.43124	6.29861	6.29913	6.47128
ASHG19A3A038475	0.00730857	2.44847	up	noncoding	ENST00000418151	RP11-562M8.4	Ensembl	400	chr9	+	32926048	32926448	TAAAAAAGGAAAATCAAAGGGATGCACAGATGGTGGGTATTTACCTCTGTCCCCAGACAC	intergenic							146.222	70.0546	7.27654	5.98467	147.36	133.067	158.237	50.0855	73.2352	68.8151	88.0825	7.27906	7.14073	7.40984	6.28151	6.02187	5.49968	6.1356
ASHG19A3A020380	6.08034e-07	4.5283	up	noncoding	ENST00000414048	CTA-714B7.4	Ensembl	380	chr22	+	35560296	35561340	GTGTATCCTTATGGGAAGCTGTGTAATCCCCATGACCATCATGATGAATTTTGCCAATGC	intergenic							3051.43	600.487	11.444	9.26507	3095.45	2995.49	3063.34	601.641	596.958	585.757	617.591	11.4406	11.4005	11.491	9.24472	9.24472	9.26599	9.30487
ASHG19A3A018664	0.00103092	3.31324	up	noncoding	AK057475		misc_RNA	2087	chr21	-	19301407	19303493	GCCAAAGACATTACTTTGAGGCATGAAAATATCCTGTGTCTGTTTCTGCAATATATGTTT	intronic antisense	NM_001204177	CHODL	chondrolectin isoform d	+	19289656	19639687	160.539	56.6455	7.40754	5.67929	160.715	169.246	151.657	59.6131	54.1919	44.2567	68.5204	7.40139	7.46448	7.35674	5.90968	5.36157	5.757	5.68893
ASHG19A3A018664	0.00103092	3.31324	up	noncoding	AK057475		misc_RNA	2087	chr21	-	19301407	19303493	GCCAAAGACATTACTTTGAGGCATGAAAATATCCTGTGTCTGTTTCTGCAATATATGTTT	intronic antisense	NM_001204175	CHODL	chondrolectin isoform c	+	19289656	19639687	160.539	56.6455	7.40754	5.67929	160.715	169.246	151.657	59.6131	54.1919	44.2567	68.5204	7.40139	7.46448	7.35674	5.90968	5.36157	5.757	5.68893
ASHG19A3A018664	0.00103092	3.31324	up	noncoding	AK057475		misc_RNA	2087	chr21	-	19301407	19303493	GCCAAAGACATTACTTTGAGGCATGAAAATATCCTGTGTCTGTTTCTGCAATATATGTTT	intronic antisense	NM_001204178	CHODL	chondrolectin isoform d	+	19289656	19639687	160.539	56.6455	7.40754	5.67929	160.715	169.246	151.657	59.6131	54.1919	44.2567	68.5204	7.40139	7.46448	7.35674	5.90968	5.36157	5.757	5.68893
ASHG19A3A018664	0.00103092	3.31324	up	noncoding	AK057475		misc_RNA	2087	chr21	-	19301407	19303493	GCCAAAGACATTACTTTGAGGCATGAAAATATCCTGTGTCTGTTTCTGCAATATATGTTT	intronic antisense	NM_001204176	CHODL	chondrolectin isoform c	+	19289656	19639687	160.539	56.6455	7.40754	5.67929	160.715	169.246	151.657	59.6131	54.1919	44.2567	68.5204	7.40139	7.46448	7.35674	5.90968	5.36157	5.757	5.68893
ASHG19A3A027206	0.000160427	29.6779	up	noncoding	ENST00000314747	CTC-298B17.1	Ensembl	1146	chr5	-	108387012	108388158	ATTCTAAAAAACTAGCTGCTGGACATGAACTACAGCCACTAGCCATTGTGGACCAGCAAC	intronic antisense	NM_005246	FER	tyrosine-protein kinase Fer	+	108083522	108523373	823.33	30.4378	9.61407	4.72276	813.005	856.846	800.138	23.5645	36.5409	23.7412	37.9044	9.57326	9.65791	9.61105	5.01717	4.42656	4.35336	5.09394
ASHG19A3A023469	0.000160624	2.63964	up	noncoding	uc003fdp.1	BC125159	UCSC_knowngene	1578	chr3	+	160285456	160287034	TCAAGAAGGATGTGGATGAAACTTACATGAACAACGTAGAGCTGGAGTCTCACCTGGAAG	intergenic							255.065	105.498	8.02179	6.62144	287.491	248.08	229.624	91.0364	103.825	106.73	120.401	8.17857	7.97988	7.90691	6.75766	6.66918	6.40037	6.65856
ASHG19A3A036613	0.0260115	4.9556	up	noncoding	ENST00000512867	RP11-400K9.2	Ensembl	2136	chr8	+	54449619	54452860	CCCATAAGCATCATCTTTCTGAAGGATTGATTACTAAATGATACAGATCTCCACATCATT	intergenic							70.4994	21.7791	6.28027	3.97121	76.5229	70.679	64.2963	7.81973	43.7548	18.6087	16.9333	6.39031	6.27672	6.17378	3.7638	4.0496	2.70718	5.36426
ASHG19A3A043475	0.000169258	3.36711	up	noncoding	ENST00000430526	RP11-122K13.8	Ensembl	264	chr10	-	135158146	135158410	AAGATGAAGACCTGTTCCGGGAATGGCCAAAGGACTCGTGGTGCCAACACCAAGCAGTCC	intergenic							729.055	214.434	9.44458	7.69307	773.7	661.524	751.941	200.639	214.205	215.116	227.777	9.50948	9.30067	9.52359	7.71993	7.72319	7.57796	7.75119
ASHG19A3A047548	2.18222e-05	2.75927	up	noncoding	AK123484		misc_RNA	1926	chr12	-	49320323	49322247	CACTAACAGAAACAGGAGATAGGGAGGAAGTCTAGGTTGTTGCAGGTGGATTGGAAGAAT	intergenic							1000.32	343.906	9.87512	8.41084	1062.04	987.651	951.272	341.21	327.703	350.039	356.672	9.93771	9.8436	9.84405	8.39835	8.45629	8.39483	8.39388
ASHG19A3L0000465	1.4151e-06	2.91348	up	noncoding	CR623725	lincRNA-ST8SIA1	lincRNA	2345	chr12	-	22477345	22589990	ATAGCTGAGCATAGGAAATTAAAAAGCCTCTTTAAAGATCTGTACTGTCTTGAGGTTGAT	intron sense-overlapping	NM_003034	ST8SIA1	alpha-N-acetylneuraminide	-	22346324	22487648	1948.56	600.582	10.8077	9.26496	2048.58	1889.15	1907.95	614.39	572.396	577.189	638.355	10.859	10.7494	10.8146	9.29793	9.22564	9.29477	9.24151
ASHG19A3A014416	0.00575015	22.5951	up	noncoding	ENST00000447355	AC068492.3	Ensembl	1390	chr2	-	136956683	136958073	TATTGGGGTCAAAGGTGCTAAAATCAAAGAACTGAGAAAACACACAAACAACCATCACGC	intergenic							462.313	27.3609	8.83533	4.33739	472.682	428.03	486.227	6.09022	33.5051	32.054	37.7941	8.85638	8.72127	8.92835	5.01212	4.87673	2.49848	4.96224
ASHG19A3A018810	0.00018623	3.18168	up	noncoding	ENST00000399566	RPS5L	Ensembl	612	chr21	-	34853886	34854502	AACAGCAACAAGCTCATGATCATGTGCATCATCAAGCATGCCTTCGATTTCATCCACCTG	intergenic							485.699	158.489	8.90366	7.23387	474.56	489.694	492.844	144.664	174.631	153.195	161.466	8.86096	8.90083	8.94919	7.19853	7.21371	7.08119	7.44206
ASHG19A3A038888	0.00659901	4.67654	up	noncoding	ENST00000413075	XXyac-YM21GA2.2	Ensembl	967	chr9	+	90459066	90462229	TATGCTGGTGGTTGGCTATGGCTATGAAGGATCAGACTCGGATAACAAATATTGGCTGGT	intergenic							173.396	46.9668	7.5093	5.28386	192.824	171.346	156.016	35.7554	51.966	24.3597	75.786	7.65226	7.48279	7.39287	6.06008	4.46535	4.98718	5.62284
ASHG19A3A007192	0.000483845	3.19581	up	noncoding	NR_015442	LOC401397	RefSeq_NR	1055	chr7	-	112756773	112758637	GCCATTCCTGTAATGGCTGCTTCCTAGAAGGTCGTGTCACGTGGAACCTCTTAATCTCAG	intergenic							304.816	104.321	8.27501	6.59883	302.258	309.143	303.048	91.9029	108.511	92.5979	124.271	8.25303	8.27497	8.29702	6.80214	6.45624	6.41339	6.72353
ASHG19A3A026341	0.0114486	8.84183	up	noncoding	ENST00000472309	RP11-84H6.1	Ensembl	591	chr4	+	179207848	179208439	CAGGCCGAGAAGAAGGAGATAATCCAGACTTTGTCCAAGGAGGAAGAGATCAAGAAATAA	intergenic							598.968	89.0346	9.1646	6.02026	659.221	451.421	686.261	31.0384	128.43	38.5738	158.096	9.29947	8.79497	9.39938	7.16813	5.15615	4.77506	6.9817
ASHG19A3A027071	4.59412e-05	5.59284	up	noncoding	ENST00000505688	CTD-2123J17.2	Ensembl	917	chr5	-	85601050	85601967	AGTGCCTTAGCCATGATTTCAGAGAGAAACCATTAGTAGACCTATTTATGATTCTATTAC	intergenic							884.461	157.915	9.71277	7.22919	949.184	881.86	822.338	174.604	145.144	151.719	160.194	9.79229	9.69704	9.64898	7.18598	7.19704	7.36814	7.1656
ASHG19A3A033310	0.0205054	2.40807	up	noncoding	ENST00000428923	RP11-401L13.2	Ensembl	947	chr7	-	102729110	102730057	GCTCATGAAAATATCTCTCACGGCAATGGGGCTACTGTAAAAATGATTCTTCTCTTTTGA	intronic antisense	NM_001161009	ARMC10	armadillo repeat-containing protein 10 isoform	+	102715327	102740205	32.6421	18.6608	5.21433	3.94645	28.6857	34.6303	34.6104	22.2794	17.7211	11.2638	23.379	5.00651	5.31949	5.31698	4.27422	3.23973	4.2656	4.00626
ASHG19A3A033310	0.0205054	2.40807	up	noncoding	ENST00000428923	RP11-401L13.2	Ensembl	947	chr7	-	102729110	102730057	GCTCATGAAAATATCTCTCACGGCAATGGGGCTACTGTAAAAATGATTCTTCTCTTTTGA	intronic antisense	NM_001161010	ARMC10	armadillo repeat-containing protein 10 isoform	+	102715327	102740205	32.6421	18.6608	5.21433	3.94645	28.6857	34.6303	34.6104	22.2794	17.7211	11.2638	23.379	5.00651	5.31949	5.31698	4.27422	3.23973	4.2656	4.00626
ASHG19A3A033310	0.0205054	2.40807	up	noncoding	ENST00000428923	RP11-401L13.2	Ensembl	947	chr7	-	102729110	102730057	GCTCATGAAAATATCTCTCACGGCAATGGGGCTACTGTAAAAATGATTCTTCTCTTTTGA	intronic antisense	NM_031905	ARMC10	armadillo repeat-containing protein 10 isoform	+	102715327	102740205	32.6421	18.6608	5.21433	3.94645	28.6857	34.6303	34.6104	22.2794	17.7211	11.2638	23.379	5.00651	5.31949	5.31698	4.27422	3.23973	4.2656	4.00626
ASHG19A3A033310	0.0205054	2.40807	up	noncoding	ENST00000428923	RP11-401L13.2	Ensembl	947	chr7	-	102729110	102730057	GCTCATGAAAATATCTCTCACGGCAATGGGGCTACTGTAAAAATGATTCTTCTCTTTTGA	intronic antisense	NM_001161013	ARMC10	armadillo repeat-containing protein 10 isoform	+	102715327	102740205	32.6421	18.6608	5.21433	3.94645	28.6857	34.6303	34.6104	22.2794	17.7211	11.2638	23.379	5.00651	5.31949	5.31698	4.27422	3.23973	4.2656	4.00626
ASHG19A3A033310	0.0205054	2.40807	up	noncoding	ENST00000428923	RP11-401L13.2	Ensembl	947	chr7	-	102729110	102730057	GCTCATGAAAATATCTCTCACGGCAATGGGGCTACTGTAAAAATGATTCTTCTCTTTTGA	intronic antisense	NM_001161011	ARMC10	armadillo repeat-containing protein 10 isoform	+	102715327	102740205	32.6421	18.6608	5.21433	3.94645	28.6857	34.6303	34.6104	22.2794	17.7211	11.2638	23.379	5.00651	5.31949	5.31698	4.27422	3.23973	4.2656	4.00626
ASHG19A3A033310	0.0205054	2.40807	up	noncoding	ENST00000428923	RP11-401L13.2	Ensembl	947	chr7	-	102729110	102730057	GCTCATGAAAATATCTCTCACGGCAATGGGGCTACTGTAAAAATGATTCTTCTCTTTTGA	intronic antisense	NM_001161012	ARMC10	armadillo repeat-containing protein 10 isoform	+	102715327	102740205	32.6421	18.6608	5.21433	3.94645	28.6857	34.6303	34.6104	22.2794	17.7211	11.2638	23.379	5.00651	5.31949	5.31698	4.27422	3.23973	4.2656	4.00626
ASHG19A3A032729	4.38421e-05	2.28162	up	noncoding	ENST00000456114	AC005537.2	Ensembl	636	chr7	-	43011865	43084204	GACTAGCATTAGCTGTCCTGATTAATAGACACTGTGACAAGATTCTTTATTGCTAAAAGA	intergenic							1002.18	413.464	9.87752	8.68746	1044.84	1013.48	948.22	394.503	393.417	433.526	432.409	9.91849	9.87372	9.84035	8.6929	8.78311	8.61309	8.66073
ASHG19A3A021657	0.00012736	7.70373	up	noncoding	ENST00000463301	RP11-548O1.1	Ensembl	410	chr3	-	138608096	138608799	ACAGCAGCCAAGTTTATTGATGCTGGGGCAATCACAATTGGTTGGTTGGTTTGAGATAGG	intergenic							278.204	40.8906	8.1473	5.20174	283.306	280.248	271.057	38.8465	45.2678	43.6542	35.7938	8.15855	8.14517	8.13816	4.93315	5.34068	5.11369	5.41943
ASHG19A3A010058	0.0013182	2.15752	up	noncoding	uc002kav.1	AK055832	UCSC_knowngene	1896	chr17	+	79604196	79606203	TGCGTATTATAGCGTATTATAATTGGGGAAACAGCATTCCAAACTTCTCTCCATGCACAG	bidirectional	NM_017921	NPLOC4	nuclear protein localization protein 4 homolog	-	79523912	79604138	183.403	96.267	7.59174	6.48237	191.619	177.812	180.779	106.322	100.363	91.3877	86.9955	7.64532	7.53303	7.59688	6.2637	6.43613	6.62399	6.60567
ASHG19A3A014670	0.00124866	2.51617	up	noncoding	ENST00000417086	AC009336.23	Ensembl	984	chr2	-	177040721	177053268	CGACCGGGGGCTGCCTGGGCAAGGGCGGGGCGAGAGGGCAGAACGCCTGCTCTCGGACAG	bidirectional	NM_024501	HOXD1	homeobox protein Hox-D1	+	177053306	177055635	173.445	78.4532	7.5115	6.18027	183.165	171.267	165.902	80.8591	88.6509	71.014	73.2889	7.57757	7.48203	7.47489	6.00631	6.07249	6.22228	6.41998
ASHG19A3A008285	1.44553e-05	16.667	up	noncoding	ENST00000422603	RP4-652L8.2	Ensembl	519	chr1	-	176585403	176585922	GAAGATGCAGTACAATTCATAGGACAAAAGCGGAGTGGAGCTTTTAAAAGCAAGCAACTT	intronic antisense	NM_020318	PAPPA2	pappalysin-2 isoform 1	+	176432306	176811970	325.164	22.5892	8.3609	4.30198	342.507	311.035	321.952	21.9327	24.8358	21.1508	22.4376	8.42508	8.28295	8.37467	4.20793	4.24576	4.24215	4.51206
ASHG19A3A008285	1.44553e-05	16.667	up	noncoding	ENST00000422603	RP4-652L8.2	Ensembl	519	chr1	-	176585403	176585922	GAAGATGCAGTACAATTCATAGGACAAAAGCGGAGTGGAGCTTTTAAAAGCAAGCAACTT	intronic antisense	NM_021936	PAPPA2	pappalysin-2 isoform 2	+	176432306	176660341	325.164	22.5892	8.3609	4.30198	342.507	311.035	321.952	21.9327	24.8358	21.1508	22.4376	8.42508	8.28295	8.37467	4.20793	4.24576	4.24215	4.51206
ASHG19A3A051197	2.1595e-06	4.13157	up	noncoding	ENST00000448724	ATP5G1P1	Ensembl	379	chr14	-	106003197	106003576	TAATCAGGCTGTGTCTGTCTCCTTCTTGAACAGCCCAGAAAATTCATCTGAACAGCCTTC	intergenic							4134.62	870.976	11.8758	9.82914	4016.67	4274.45	4112.75	881.221	873.853	850.037	878.795	11.8086	11.913	11.906	9.78679	9.8011	9.85206	9.8766
ASHG19A3A037667	7.91375e-06	7.31151	up	noncoding	ENST00000441651	RP11-791O21.1	Ensembl	451	chr9	-	91585805	91586256	CTCCTTCAATAAAGGAGTTTGGGTTTTCTGATAACCAGAAGTTATGGGAGCAAAATATAA	intergenic							520.673	75.3792	8.99215	6.12198	534.265	517.741	510.014	74.868	71.3921	79.2487	76.0079	9.01376	8.96889	8.99381	6.06446	6.2243	6.10058	6.0986
ASHG19A3A039803	4.51062e-05	5.4553	up	noncoding	AK096921		misc_RNA	2569	chrX	-	46458902	46461789	GGTACTTTTTACTTGGAAAGTTGTACTATGTCCATGAAAATGGTTAAATGAGAAGGCCAT	intergenic							14544.7	2172.36	13.628	11.1803	13731.8	16025.4	13877	1991.09	2134.15	2197.87	2366.34	13.5277	13.7577	13.5984	11.2626	11.2116	11.0555	11.1916
ASHG19A3A041390	0.00362885	4.00832	up	noncoding	ENST00000448300	RP1-136J15.1	Ensembl	230	chrX	+	108880062	108880292	GATTCAGAATGTGTTATTCCTCCCAGAACAATGACACCGAGGACATAATTTTTCCTTTGA	intergenic							1034.89	257.696	9.91907	7.91608	1151.96	957.289	995.424	178.511	196.27	321.342	334.661	10.0465	9.80183	9.90884	8.30646	8.33622	7.40491	7.61671
ASHG19A3A007484	3.89323e-05	8.33538	up	noncoding	NR_027169	NCRNA00188	RefSeq_NR	1068	chr17	+	16342300	16345338	GGGTGTGCAAACCCGAGAGAACTGGGAAGTGCCGTCAGAAGCGATAACTGACGACGTCTA	natural antisense	NM_001113567	C17orf76	leucine-rich repeat-containing protein C17orf76	-	16345327	16395480	894.009	108.638	9.72639	6.66714	945.561	908.232	828.235	107.769	116.351	99.5662	110.867	9.78572	9.73287	9.66057	6.62869	6.56424	6.6436	6.83202
ASHG19A3A007484	3.89323e-05	8.33538	up	noncoding	NR_027169	NCRNA00188	RefSeq_NR	1068	chr17	+	16342300	16345338	GGGTGTGCAAACCCGAGAGAACTGGGAAGTGCCGTCAGAAGCGATAACTGACGACGTCTA	natural antisense	NM_207387	C17orf76	leucine-rich repeat-containing protein C17orf76	-	16345327	16395480	894.009	108.638	9.72639	6.66714	945.561	908.232	828.235	107.769	116.351	99.5662	110.867	9.78572	9.73287	9.66057	6.62869	6.56424	6.6436	6.83202
ASHG19A3A036231	0.00398028	3.52091	up	noncoding	BC034591		misc_RNA	1390	chr1	+	182584388	182585762	TAAACCACTTTGATGAGGACCAAACAGGTGCTACTGCTGAAAGCTAGACACCACATCCTA	intergenic							44.1798	17.0215	5.63738	3.82143	43.2861	44.1392	45.1142	11.7026	21.3828	15.4786	19.5219	5.58051	5.64032	5.69131	3.98586	3.75138	3.25308	4.29541
ASHG19A3L0003507	2.07162e-05	2.14678	up	noncoding	CN273898	lincRNA-TMCO5A-2	lincRNA	807	chr15	+	37400695	37401493	AGGATGTGTTTTCATTTCCATAACACTGGAAGCACTTTCTGTAAACCTTTTGATGGACTT	intergenic							655.889	299.341	9.30738	8.20521	658.243	676.247	633.177	299.958	281.089	290.906	325.411	9.29763	9.33133	9.29319	8.26346	8.19061	8.19519	8.17157
ASHG19A3A026148	0.0130032	3.1668	up	noncoding	ENST00000505168	RP11-588F18.1	Ensembl	528	chr4	+	151948241	151948769	TGACCCTACATTTACACACTTTTCTCGAACAAGATCACACCTATTCAGTCCAAAGAAGCA	intergenic							70.051	29.3685	6.27233	4.6093	73.3268	71.3315	65.4946	37.3457	26.0078	15.5983	38.522	6.32966	6.28869	6.19864	5.04105	3.76437	5.05133	4.58047
ASHG19A3A031877	0.000585123	6.66149	up	noncoding	ENST00000406773	RP1-121G13.3	Ensembl	777	chr6	+	100978151	100978928	AGTACAGTGATTGCAAATCACGTGTCTAATTATGATGAAGGAGCATGGCCTGTTCTTATT	intronic antisense	NM_006828	ASCC3	activating signal cointegrator 1 complex subunit	-	100956607	101329224	77.5039	15.2504	6.40214	3.6663	90.0793	66.4451	75.9873	19.5904	12.9081	14.2541	14.2489	6.60923	6.19055	6.40665	3.47647	3.61997	4.07094	3.49782
ASHG19A3A020931	0.0236391	2.26726	up	noncoding	G36676		misc_RNA	501	chr3	-	42266117	42266618	CTTTTTCCTTTCAGTCCTATTGTTAAAGGTGTCTTGGGTCCGGTCTTAAATCAATTTGGT	natural antisense	NM_001042646	TRAK1	trafficking kinesin-binding protein 1 isoform 1	+	42132745	42267268	105.287	57.888	6.8323	5.65135	113.484	102.924	99.4536	93.059	43.2744	44.6775	50.541	6.9266	6.79214	6.77817	5.44995	5.37842	6.43082	5.34621
ASHG19A3A035981	0.000364625	2.71847	up	noncoding	ENST00000500619	AP003357.3	Ensembl	2952	chr8	-	98737114	98742478	TACGTCCCATCCAGCTTCATGGCTAGTGGGACCAAGCAACTGTTTGAAATTGAAGTTTAT	natural antisense	NM_178812	MTDH	protein LYRIC	+	98656406	98742488	251.288	102.092	8.01117	6.56837	249.747	249.174	254.942	111.768	99.1587	106.833	90.6075	7.99492	7.98618	8.05241	6.32154	6.67073	6.69539	6.58583
ASHG19A3A030587	0.00118911	3.10303	up	noncoding	ENST00000414680	RPL35AP3	Ensembl	288	chr6	-	137295066	137295354	ACACAATGATTCCTGGCAGCAAACCAAACAAAAGCAGAGTAATCTGGGGAAAGGTAACCC	intergenic							1458.18	432.394	10.3872	8.7535	1314.72	1382.06	1677.75	471.03	368.674	422.091	467.782	10.2347	10.3006	10.6262	8.81448	8.74361	8.89304	8.56284
ASHG19A3A041109	1.11569e-06	6.50747	up	noncoding	ENST00000412159	RP11-133K18.1	Ensembl	1677	chrX	+	65717589	65719266	AACTTGGCTATGAATGTTGGCAAGGCCGGAGGTTTCTTCAAGAAGGAAGATGTGGTCATT	intergenic							2175.38	310.686	10.9636	8.26146	2177.21	2152.54	2196.38	317.737	314.228	305.845	304.932	10.9396	10.9388	11.0123	8.17073	8.26312	8.28354	8.32845
ASHG19A3A036918	0.000149076	2.41052	up	noncoding	ENST00000358374	RP11-622O11.1	Ensembl	1378	chr8	+	127084830	127086475	GAGAACGAGGAACAGAAACTGAAATTTCTCAAACTTATGGGTGGCTTCAAAAATCTGTCC	intergenic							325.284	144.079	8.3632	7.09386	344.767	329.985	301.098	148.944	141.122	138.494	147.758	8.43482	8.36732	8.28746	7.07062	7.05827	7.12437	7.12218
ASHG19A3A007423	0.000437268	2.77098	up	noncoding	NR_026839	DSCR8	RefSeq_NR	728	chr21	+	39493544	39528604	ATGGTTAAATTAAAAAAAAAAAAGAGCACGACAAACCTTGGAAATCAAGAAAGTTCTGGA	bidirectional	NM_005867	DSCR4	Down syndrome critical region protein 4	-	39426312	39493454	376.489	144.065	8.5581	7.08771	370.533	428.725	330.208	138.166	137.351	137.188	163.557	8.53468	8.72406	8.41556	7.21765	7.04365	7.01087	7.07866
ASHG19A3A015530	0.000293467	15.4973	up	noncoding	ENST00000456500	AC010878.3	Ensembl	1047	chr2	+	38044057	38045104	CTTGAACAAACCCAAAGCAAGACCTAAGGAAATTAGTGGTCACACTTCTGGTATAAAAAA	intergenic							175.978	14.5773	7.53374	3.57979	185.263	164.505	178.167	19.8024	12.5335	14.2463	11.7269	7.59662	7.42766	7.57694	3.16457	3.61863	4.08704	3.44893
ASHG19A3A000359	0.00241253	2.98244	up	noncoding	ENST00000455088	AL589743.1	Ensembl	2102	chr14	+	19650027	19692647	TTTCTTGATCTCTTTATCTGTGGATGAACAGGCTAGTCACCCTGCTGTGGAATAGAAGGC	intergenic							313.629	115.943	8.31529	6.7388	332.926	315.487	292.475	137.534	83.1292	131.245	111.865	8.39055	8.30637	8.24897	6.64212	6.97903	7.0043	6.32975
ASHG19A3A044341	0.000519661	2.46407	up	noncoding	ENST00000426339	RP11-34E5.2	Ensembl	738	chr10	+	98319941	98320679	CTACATGAGATAATCCAGCCAAAAATGCACAAAAGTCAAATCAGAATGGAAAAGACTCAA	intronic antisense	NM_020123	TM9SF3	transmembrane 9 superfamily member 3 precursor	-	98277866	98346809	37285.2	11753.5	14.9684	13.6674	39018.2	34665.8	38171.7	12381.3	11473.3	12240.9	10918.5	15.002	14.857	15.0463	13.4876	13.7367	13.7605	13.6846
ASHG19A3A029306	0.0143501	2.2824	up	noncoding	uc003mth.1	AX747750	UCSC_knowngene	2301	chr6	-	709104	711405	TAGGGTTTTTCACATGATACTGATTCTGCATTTGAAATGCAGAATCATAAGAAATGCTGC	intergenic							52.8713	29.6181	5.87803	4.68748	60.5267	46.9506	51.1365	24.6547	26.1588	40.1652	27.4936	6.04672	5.7266	5.86078	4.52079	5.21591	4.42397	4.58925
ASHG19A3A007386	8.40108e-06	2.39818	up	noncoding	NR_026591	RAD1	RefSeq_NR	4525	chr5	-	34905366	34915731	AAAGTGTGTGCAAGCAAATGCTTTTATTCAGGGACTTTAACTGCACTTCGAATGTGTTAC	bidirectional	NM_018321	BRIX1	ribosome biogenesis protein BRX1 homolog	+	34915819	34925787	1139.88	442.243	10.0544	8.7925	1157.69	1165.54	1096.41	455.557	414.389	437.625	461.403	10.054	10.0712	10.0382	8.79497	8.79784	8.83472	8.74248
ASHG19A3A007386	8.40108e-06	2.39818	up	noncoding	NR_026591	RAD1	RefSeq_NR	4525	chr5	-	34905366	34915731	AAAGTGTGTGCAAGCAAATGCTTTTATTCAGGGACTTTAACTGCACTTCGAATGTGTTAC	exon sense-overlapping	NM_002853	RAD1	cell cycle checkpoint protein RAD1	-	34905365	34915780	1139.88	442.243	10.0544	8.7925	1157.69	1165.54	1096.41	455.557	414.389	437.625	461.403	10.054	10.0712	10.0382	8.79497	8.79784	8.83472	8.74248
ASHG19A3A007906	0.000273524	2.85853	up	noncoding	ENST00000413899	HMGB1L11	Ensembl	637	chr1	-	171240092	171240729	TGCATATTGAGCTAAAGGGAAGCCTGATGCAGCAAAAAAGGGATTTATCAAGGCTGAAAA	intronic antisense	NM_002021	FMO1	dimethylaniline monooxygenase [N-oxide-forming]	+	171217662	171255113	1817.04	571.34	10.702	9.18668	1866.4	1733.99	1850.72	518.272	643.114	529.753	594.223	10.7193	10.6122	10.7745	9.18762	9.09215	9.046	9.42096
ASHG19A3A043627	0.00036273	2.11296	up	noncoding	G36882		misc_RNA	430	chr1	-	38174816	38175246	TGTGGCCAATGACATAAAACCTCCAGAATCTGGGCCCTACAGTTCCCTTATCCAAATTTC	natural antisense	NM_018101	CDCA8	borealin	+	38158158	38175391	188.769	100.788	7.62925	6.54999	201.325	186.467	178.516	97.4806	102.843	88.0748	114.755	7.71015	7.59744	7.58018	6.6825	6.3793	6.49604	6.64212
ASHG19A3A019810	7.59043e-05	4.84609	up	noncoding	ENST00000431924	RP3-508I15.9	Ensembl	541	chr22	-	39063834	39077775	TGCCATTGTCTTCAAATCTTGAAGACATACATTTTATCATGTGGCTACTAACGATCCTGG	bidirectional	NM_020243	TOMM22	mitochondrial import receptor subunit TOM22	+	39077953	39080766	173.462	41.7119	7.51281	5.23598	184.725	165.044	170.615	45.1986	39.466	41.7892	40.3938	7.59095	7.43258	7.51488	5.1144	5.27557	5.34311	5.21086
ASHG19A3A019810	7.59043e-05	4.84609	up	noncoding	ENST00000431924	RP3-508I15.9	Ensembl	541	chr22	-	39063834	39077775	TGCCATTGTCTTCAAATCTTGAAGACATACATTTTATCATGTGGCTACTAACGATCCTGG	natural antisense	NM_015373	CBY1	protein chibby homolog 1 isoform a	+	39052657	39069855	173.462	41.7119	7.51281	5.23598	184.725	165.044	170.615	45.1986	39.466	41.7892	40.3938	7.59095	7.43258	7.51488	5.1144	5.27557	5.34311	5.21086
ASHG19A3A019810	7.59043e-05	4.84609	up	noncoding	ENST00000431924	RP3-508I15.9	Ensembl	541	chr22	-	39063834	39077775	TGCCATTGTCTTCAAATCTTGAAGACATACATTTTATCATGTGGCTACTAACGATCCTGG	natural antisense	NM_001002880	CBY1	protein chibby homolog 1 isoform b	+	39052657	39069855	173.462	41.7119	7.51281	5.23598	184.725	165.044	170.615	45.1986	39.466	41.7892	40.3938	7.59095	7.43258	7.51488	5.1144	5.27557	5.34311	5.21086
ASHG19A3A038374	0.000101104	2.81835	up	noncoding	ENST00000396994	RP11-280O24.1	Ensembl	481	chr9	+	14068930	14069411	AGACGACCACTGAGGACCTGAATGAAGCTTTCCCAGAAACCAAATGAGACAAGAGAAAGT	intergenic							38991	10788.6	15.0387	13.5439	39155.8	38915.3	38902.1	9765.66	10941.7	10903.7	11543.5	15.008	15.0317	15.0764	13.5883	13.5671	13.414	13.6061
ASHG19A3A041268	6.1625e-07	6.97586	up	noncoding	ENST00000441503	RP11-156J23.1	Ensembl	453	chrX	+	92297488	92297941	CATCAAGAACATGCCAGACACATTTTATTTGGTGGTAAGCTGATTGCTTTTTCACATTTA	intergenic							3066.32	401.955	11.4479	8.6455	3042.78	3146.67	3009.52	391.846	399.725	404.854	411.393	11.4138	11.4663	11.4635	8.61574	8.6819	8.60318	8.6812
ASHG19A3A012254	0.0182578	7.24627	up	noncoding	ENST00000434442	RSL24D1P8	Ensembl	492	chr19	+	12207238	12207730	CAGTTGGAAGAGAAAATGGTATAGCATTTACAACAGGATGTGGACATGGAAGGTGCTTCT	intergenic							1101.9	176.828	10.0044	7.14717	1077.59	1112.54	1115.59	45.8455	199.98	223.122	238.363	9.95481	9.99716	10.0613	7.79509	7.78311	5.36294	7.64755
ASHG19A3A020797	0.000211304	12.0596	up	noncoding	ENST00000439846	AC097635.2	Ensembl	1928	chr3	-	19981760	19984802	TTTGATGCCAAATCTGATTGCTGATTGGACACAGACTTGATTATGCTGTTGTCCAGTCTG	intergenic							184.515	19.05	7.59504	4.00293	181.391	200.782	171.371	15.2311	14.3873	21.6987	24.883	7.56395	7.69973	7.52143	4.37395	4.2882	3.67564	3.67393
ASHG19A3A041897	0.000965893	2.01487	up	noncoding	ENST00000421895	OFD1P2	Ensembl	1150	chrY	-	20242566	20258088	TACTACTAAAGGAAGAAAAACTGGAAGAGAATAAAAATAAAAACATGCATCTCTTAAACC	intergenic							64.0583	39.2224	6.14089	5.1302	75.3161	60.4593	56.3996	33.192	39.9458	36.3317	47.42	6.36557	6.06119	5.99592	5.35621	5.0653	4.87165	5.22766
ASHG19A3A017291	0.0215877	2.4477	up	noncoding	AY927519		RNAdb	1272	chr20	-	3683708	3687310	GGTCCTGGGCATGGGAACTTCAAGGCCACTTACCTGGAGGTGGCCTTGAGCTCATGTCCC	exon sense-overlapping	NM_023068	SIGLEC1	sialoadhesin precursor	-	3667616	3687775	51.8283	27.6156	5.83847	4.54705	48.0806	63.0048	44.3994	39.2845	25.1909	28.2067	17.7803	5.72862	6.11861	5.66819	3.8399	4.68472	5.12925	4.53432
ASHG19A3A008484	8.60727e-06	3.15484	up	noncoding	uc002ilp.1	BC067758	UCSC_knowngene	1257	chr17	-	45527592	45569847	AAAGCAGGATTGGTTATTCCTCCAGAAAAATCGGACCGTTCCATACATCTGGCCTGTACA	intergenic							4573.96	1241.26	12.0215	10.364	4726.06	4645.27	4350.55	1278.45	1203.45	1212.52	1270.62	12.0425	12.0292	11.993	10.3477	10.3439	10.4121	10.3521
ASHG19A3A037458	4.74227e-05	8.92929	up	noncoding	ENST00000425737	RP11-532L16.1	Ensembl	517	chr1	+	200298288	200298805	ATACCATCAAGAAGAAGCTGACAGGGATCCTGCATGAATTACCAGCAAATGGCTACAGGA	intergenic							475.682	57.5394	8.87388	5.71534	488.87	461.801	476.376	49.7006	59.4909	59.6169	61.3493	8.89734	8.82209	8.90221	5.73953	5.80279	5.48658	5.83245
ASHG19A3L0002132	0.000798396	3.81608	up	noncoding	DA924741	lincRNA-STMN2-2	lincRNA	554	chr8	+	79717450	79846051	TAACAGTATGAGTTCTGCAGTTATACAGAACTAAGTCCATTAGCTGTGTGACCCATGGCC	natural antisense	NM_001199887	IL7	interleukin-7 isoform 3 precursor	-	79645006	79717758	93.8442	30.434	6.67884	4.74675	96.5701	92.0259	92.9365	24.2407	34.5079	32.2667	30.7208	6.71116	6.64112	6.68424	4.69432	4.88664	4.39713	5.00889
ASHG19A3L0002132	0.000798396	3.81608	up	noncoding	DA924741	lincRNA-STMN2-2	lincRNA	554	chr8	+	79717450	79846051	TAACAGTATGAGTTCTGCAGTTATACAGAACTAAGTCCATTAGCTGTGTGACCCATGGCC	natural antisense	NM_000880	IL7	interleukin-7 isoform 1 precursor	-	79645006	79717758	93.8442	30.434	6.67884	4.74675	96.5701	92.0259	92.9365	24.2407	34.5079	32.2667	30.7208	6.71116	6.64112	6.68424	4.69432	4.88664	4.39713	5.00889
ASHG19A3L0002132	0.000798396	3.81608	up	noncoding	DA924741	lincRNA-STMN2-2	lincRNA	554	chr8	+	79717450	79846051	TAACAGTATGAGTTCTGCAGTTATACAGAACTAAGTCCATTAGCTGTGTGACCCATGGCC	natural antisense	NM_001199888	IL7	interleukin-7 isoform 4 precursor	-	79645006	79717758	93.8442	30.434	6.67884	4.74675	96.5701	92.0259	92.9365	24.2407	34.5079	32.2667	30.7208	6.71116	6.64112	6.68424	4.69432	4.88664	4.39713	5.00889
ASHG19A3L0002132	0.000798396	3.81608	up	noncoding	DA924741	lincRNA-STMN2-2	lincRNA	554	chr8	+	79717450	79846051	TAACAGTATGAGTTCTGCAGTTATACAGAACTAAGTCCATTAGCTGTGTGACCCATGGCC	natural antisense	NM_001199886	IL7	interleukin-7 isoform 2 precursor	-	79645006	79717758	93.8442	30.434	6.67884	4.74675	96.5701	92.0259	92.9365	24.2407	34.5079	32.2667	30.7208	6.71116	6.64112	6.68424	4.69432	4.88664	4.39713	5.00889
ASHG19A3A047781	0.0148787	2.51818	up	noncoding	AF085835		misc_RNA	669	chr12	-	67437660	67438319	GCTGAGAAATGCCTTTGGATTTCCTCCAAATAGCTTCTTTATCTATTCACTGTTTGAAAT	intergenic							27.4185	15.4176	4.98457	3.65219	25.7137	27.6739	28.868	16.2593	9.3358	15.0435	21.0319	4.85658	5.02336	5.07379	4.10359	3.70989	3.77774	3.01755
ASHG19A3A019250	0.00500788	2.02653	up	noncoding	AJ001890		misc_RNA	692	chr21	+	39727784	39728472	AAAGTGATCACGGTTCTGCTTATTTTTGGTCATCGCAACCAATGTACTGAGCCCCCTTTG	intergenic							55.0943	34.206	5.93544	4.91643	54.7523	60.0837	50.4469	25.361	35.1243	36.2917	40.0468	5.91216	6.05309	5.84106	5.09986	5.06306	4.46596	5.03683
ASHG19A3A039217	0.00042693	4.83715	up	noncoding	ENST00000411924	RP11-417B4.3	Ensembl	246	chr9	+	126521498	126522054	GACTTTGTCAAGATGGACTAGAAGAGGTCACTGAGTTTGAAATCACACCAGAAGGAAGAA	intronic antisense	NM_020946	DENND1A	DENN domain-containing protein 1A isoform 1	-	126141932	126692417	2056.43	396.459	10.8821	8.6079	2169.72	1991.46	2008.11	485.063	306.033	368.218	426.52	10.9356	10.8231	10.8874	8.67197	8.53105	8.9377	8.29087
ASHG19A3A039217	0.00042693	4.83715	up	noncoding	ENST00000411924	RP11-417B4.3	Ensembl	246	chr9	+	126521498	126522054	GACTTTGTCAAGATGGACTAGAAGAGGTCACTGAGTTTGAAATCACACCAGAAGGAAGAA	intronic antisense	NM_024820	DENND1A	DENN domain-containing protein 1A isoform 2	-	126163869	126692417	2056.43	396.459	10.8821	8.6079	2169.72	1991.46	2008.11	485.063	306.033	368.218	426.52	10.9356	10.8231	10.8874	8.67197	8.53105	8.9377	8.29087
ASHG19A3L0002224	0.0120857	4.18977	up	noncoding	AI553950	lincRNA-INSL6	lincRNA	449	chr9	+	5131978	5164252	CTTTTTATCCTTATACTCAGGTAGTGACTGCATTTCCCAACTGGTTACTGCTTCCTTCCA	natural antisense	NM_007179	INSL6	insulin-like peptide INSL6 precursor	-	5163862	5185618	164.923	49.1707	7.43901	5.37214	189.634	163.456	141.679	79.0133	28.1857	52.988	36.496	7.63206	7.41962	7.26535	4.96235	5.63176	6.18613	4.70831
ASHG19A3A015048	2.81209e-05	4.50317	up	noncoding	BC042017		RNAdb	1423	chr2	-	223181965	223183372	AGTGGTTTGGCTGCAATGTAGAAACTACAGTATGAAGTGTTTTATGTCTGCATTGTCTTA	intergenic							464.452	108.969	8.84295	6.67201	478.99	444.537	469.83	110.48	113.436	106.238	105.722	8.87276	8.7737	8.88239	6.55782	6.66089	6.67816	6.79117
ASHG19A3A013448	0.0127057	2.25884	up	noncoding	ENST00000445878	AC104695.3	Ensembl	3001	chr2	-	28607275	28617539	AAGTATGACTTTCTCTCCTGTGGCTTTACACAACCTCCTTGAAATTCCAAGAGCAACCCT	intronic antisense	NM_005253	FOSL2	fos-related antigen 2	+	28615778	28637516	349.99	169.21	8.46637	7.29079	341.825	364.751	343.393	145.344	181.711	118.883	230.901	8.42303	8.50679	8.46928	7.74177	6.83202	7.08932	7.50003
ASHG19A3A030247	0.000951452	4.36052	up	noncoding	NR_002767	NCRNA00120	RefSeq_NR	914	chr6	-	88410019	88410933	AATGTCTCGTTATCAGTAGCTTAAAAAACCGAAGTATATACCTCTGTATTTGGTGACTTC	intron sense-overlapping	NM_018064	AKIRIN2	akirin-2	-	88384577	88411985	120.791	33.8825	7.01809	4.89359	116.061	135.116	111.198	24.3164	33.3289	35.6097	42.2752	6.95955	7.16044	6.93429	5.18413	5.03502	4.40162	4.95359
ASHG19A3A022149	0.0123064	11.6525	up	noncoding	ENST00000393644	AC092933.4	Ensembl	945	chr3	-	196254209	196255662	AGCCCATTGATTTTCACCCCCTCTTTCTTGTAAAGCTTTCCTGCACTGCCATGTTTTTGT	intergenic							10448.7	982.222	13.1681	9.62553	11203.2	10868.1	9274.69	1683.67	340.526	1503.04	401.656	13.2414	13.2223	13.0406	8.5796	10.6565	10.8144	8.45169
ASHG19A3A017064	0.0016529	2.88127	up	noncoding	ENST00000428736	AC007559.1	Ensembl	355	chr2	+	230566509	230566864	GGAAAAACTGATAGAATCTGAGTGTCTTCAGGCCAGCATAATGGAAATGTTCTCTGAAGA	intronic antisense	NM_139072	DNER	delta and Notch-like epidermal growth	-	230222344	230579286	5292.68	1583.94	12.2287	10.702	5233.95	5232.32	5411.76	1221.59	1607.25	1744.79	1762.12	12.1819	12.211	12.2932	10.8191	10.8689	10.3417	10.7783
ASHG19A3A020005	6.00022e-06	4.73456	up	noncoding	ENST00000398242	LA16c-60H5.7	Ensembl	1049	chr22	+	16122719	16123768	ATGTCTCTAGCTGGGAAATACACATTGAACAACTGGTTGGCAACGTTAACGTTGAGCCAG	intergenic							1410.91	279.919	10.3472	8.10393	1419.34	1439.87	1373.52	275.92	284.803	266.394	292.56	10.3337	10.3556	10.3521	8.10807	8.0522	8.06791	8.18752
ASHG19A3A049691	0.00100101	3.46748	up	noncoding	AK021576		NRED	2136	chr13	-	79890367	79924372	TTACTAGAACTGATTTTGGGGGACTTTATCCACTCTTACTTGGAACACTAACTGTTGGCT	intron sense-overlapping	NM_022118	RBM26	RNA-binding protein 26	-	79894099	79979923	38.9189	15.3072	5.46395	3.67006	39.673	38.1577	38.926	14.5448	11.7827	15.7138	19.1874	5.45505	5.449	5.48781	3.95738	3.77774	3.59957	3.34557
ASHG19A3A048996	2.56802e-05	3.27998	up	noncoding	ENST00000415580	RP5-947P14.2	Ensembl	623	chr1	-	106623378	106624001	GAAAAAGTTTACACGAGTCCGCGATGCGGAGTCCCCGATGAAGATGGCTACGACTGGGGT	intergenic							520.939	162.84	8.99235	7.27866	517.576	544.924	500.316	156.308	166.322	165.364	163.366	8.97312	9.03486	8.96907	7.21656	7.32816	7.19981	7.37012
ASHG19A3A026966	0.000233915	3.75892	up	noncoding	ENST00000448508	RP11-524L6.2	Ensembl	984	chr5	-	75216490	75217485	AACCCAGAGACCGACTGCCTTATGGGCAAGGATGGCAAGAAGTTCAAGCTGGAGGCTCCA	intergenic							450.338	126.401	8.80259	6.89228	470.124	460.148	420.742	116.802	139.718	123.674	125.409	8.84945	8.81711	8.74122	6.81454	6.89039	6.75637	7.1078
ASHG19A3A052720	1.95808e-06	9.78952	up	noncoding	ENST00000433201	AC104759.2	Ensembl	531	chr15	+	31712330	31712863	GAACCCAACATTGATAGCCCTTTGAACATGCATGCTGTTGAGTTCTGGAAAAACCCTACA	intergenic							5534.79	502.368	12.2877	8.99649	5552.3	5684.36	5367.72	482.386	506.81	515.832	504.446	12.2673	12.3204	12.2754	8.9362	9.05321	8.92951	9.06706
ASHG19A3A018930	0.000258999	14.3567	up	noncoding	uc002zbk.1	BC041455	UCSC_knowngene	1775	chr21	-	44019389	44035168	ATTCAGAAACAAAGCCGTGCCATCTGCGGCAGAGGATTCTGCGAAAAATTCTGAAAAGTC	intergenic							117.467	10.8599	6.98325	3.13959	121.515	116.678	114.21	7.67034	10.0038	14.133	11.6324	7.0218	6.96061	6.96734	3.1517	3.60478	2.69011	3.11179
ASHG19A3A020957	0.000129833	7.03937	up	noncoding	ENST00000399046	RP11-944L7.3	Ensembl	1062	chr3	-	44566235	44567297	CACCAGCGGTTCCTCTAACACAGAGAGGAACTGGCTTTACTACTTTGGGTTTGGTTTTTT	intergenic							658.236	96.9193	9.30687	6.49142	708.603	657.004	609.1	106.603	90.0309	102.329	88.7147	9.396	9.28973	9.23488	6.29186	6.6046	6.62701	6.44222
ASHG19A3A011989	0.005239	2.36331	up	noncoding	ENST00000398858	AC011544.1	Ensembl	612	chr19	+	1203207	1203822	TTGCTGCATATCGTGCTAAGGGCAAAAGTGAAGCAGGAAAGAAGGGCTCAAAGAAGAACA	intergenic							13891	4787.78	13.5618	12.321	14991.6	14592.4	12089	4544.98	5324.81	3704.5	5576.84	13.6498	13.6249	13.4108	12.5099	11.9671	12.27	12.537
ASHG19A3A011244	0.000377123	3.04878	up	noncoding	NR_027307	LOC729991-MEF2B	RefSeq_NR	2268	chr19	-	19256375	19303400	CCTGGCCCCCTGGCAGCCCTCGAGGGGTGATGGGCCCCCCGCCGTGTCCTCCCAGCCCAG	exon sense-overlapping	NM_001145783	MEF2BNB	protein MEF2BNB isoform 2	-	19292684	19303400	4999.9	1398.45	12.1422	10.5339	5230.51	5069.19	4699.99	1348.4	1530.33	1210.82	1504.27	12.1805	12.157	12.089	10.5909	10.3419	10.4938	10.7091
ASHG19A3A011244	0.000377123	3.04878	up	noncoding	NR_027307	LOC729991-MEF2B	RefSeq_NR	2268	chr19	-	19256375	19303400	CCTGGCCCCCTGGCAGCCCTCGAGGGGTGATGGGCCCCCCGCCGTGTCCTCCCAGCCCAG	exon sense-overlapping	NM_001145784	MEF2BNB	protein MEF2BNB isoform 1	-	19287712	19303400	4999.9	1398.45	12.1422	10.5339	5230.51	5069.19	4699.99	1348.4	1530.33	1210.82	1504.27	12.1805	12.157	12.089	10.5909	10.3419	10.4938	10.7091
ASHG19A3A011244	0.000377123	3.04878	up	noncoding	NR_027307	LOC729991-MEF2B	RefSeq_NR	2268	chr19	-	19256375	19303400	CCTGGCCCCCTGGCAGCCCTCGAGGGGTGATGGGCCCCCCGCCGTGTCCTCCCAGCCCAG	natural antisense	NM_134440	RFXANK	DNA-binding protein RFXANK isoform b	+	19303007	19312678	4999.9	1398.45	12.1422	10.5339	5230.51	5069.19	4699.99	1348.4	1530.33	1210.82	1504.27	12.1805	12.157	12.089	10.5909	10.3419	10.4938	10.7091
ASHG19A3A011244	0.000377123	3.04878	up	noncoding	NR_027307	LOC729991-MEF2B	RefSeq_NR	2268	chr19	-	19256375	19303400	CCTGGCCCCCTGGCAGCCCTCGAGGGGTGATGGGCCCCCCGCCGTGTCCTCCCAGCCCAG	exon sense-overlapping	NM_001145785	MEF2B	myocyte-specific enhancer factor 2B isoform a	-	19256375	19281098	4999.9	1398.45	12.1422	10.5339	5230.51	5069.19	4699.99	1348.4	1530.33	1210.82	1504.27	12.1805	12.157	12.089	10.5909	10.3419	10.4938	10.7091
ASHG19A3A011244	0.000377123	3.04878	up	noncoding	NR_027307	LOC729991-MEF2B	RefSeq_NR	2268	chr19	-	19256375	19303400	CCTGGCCCCCTGGCAGCCCTCGAGGGGTGATGGGCCCCCCGCCGTGTCCTCCCAGCCCAG	exon sense-overlapping	NM_005919	MEF2BNB-MEF2B	myocyte enhancer factor 2B isoform b	-	19256375	19303400	4999.9	1398.45	12.1422	10.5339	5230.51	5069.19	4699.99	1348.4	1530.33	1210.82	1504.27	12.1805	12.157	12.089	10.5909	10.3419	10.4938	10.7091
ASHG19A3A011244	0.000377123	3.04878	up	noncoding	NR_027307	LOC729991-MEF2B	RefSeq_NR	2268	chr19	-	19256375	19303400	CCTGGCCCCCTGGCAGCCCTCGAGGGGTGATGGGCCCCCCGCCGTGTCCTCCCAGCCCAG	natural antisense	NM_003721	RFXANK	DNA-binding protein RFXANK isoform a	+	19303007	19312678	4999.9	1398.45	12.1422	10.5339	5230.51	5069.19	4699.99	1348.4	1530.33	1210.82	1504.27	12.1805	12.157	12.089	10.5909	10.3419	10.4938	10.7091
ASHG19A3A031978	6.20604e-05	2.20212	up	noncoding	NR_027338	TPI1P3	RefSeq_NR	1214	chr6	+	116359893	116361106	TTATATCTTCACCCTGTAATGGTTGGGACCAGGCCACTCCCTTCTCCACTTAGTATAATC	intronic antisense	NM_002031	FRK	tyrosine-protein kinase FRK	-	116262692	116381921	53800.8	18647.2	15.4878	14.3489	56642	55191.2	49569.1	17966.9	18494.5	19057.9	19069.6	15.523	15.5143	15.426	14.3044	14.3951	14.3274	14.3686
ASHG19A3A027249	0.000333583	2.84676	up	noncoding	ENST00000507241	CTC-428G20.3	Ensembl	2231	chr5	-	114539712	114541943	ATTTTCATCTTGTCATTTAAGTTTCAGCAATTGAGTACCACACTAGAACACCCACAAATG	intergenic							1224.58	400.218	10.1456	8.63633	1299.42	1326.48	1047.85	378.546	402.794	382.944	436.586	10.2184	10.2457	9.97285	8.70819	8.59293	8.55018	8.694
ASHG19A3A020120	0.000909347	2.22757	up	noncoding	ENST00000426448	XXbac-B562F10.11	Ensembl	1703	chr22	+	20804408	20806111	GACTCTATGCAATTGCAGGATATGAAGGTAAGTCCCTGCTAAGTAGCATTGAATGTTACA	intronic antisense	NM_032775	KLHL22	kelch-like protein 22	-	20795805	20850170	173.012	88.844	7.51058	6.35511	171.956	175.468	171.613	98.8501	74.1728	82.306	100.047	7.49218	7.5162	7.52336	6.46787	6.27803	6.51696	6.15759
ASHG19A3A045585	1.0055e-05	2.79354	up	noncoding	ENST00000503887	RP11-675M1.1	Ensembl	755	chr11	-	92099661	92100416	AAATGAGTACTGATTGCAGCCCATGGAAACAGCCTTCCAACCATTGTCAAGCATGTGGAA	intronic antisense	NM_001008781	FAT3	protocadherin Fat 3	+	92085261	92629635	2419.13	764.956	11.1154	9.63327	2485.32	2336.95	2435.13	806.165	774.306	711.732	767.621	11.1334	11.0512	11.1616	9.57501	9.54698	9.7165	9.69457
ASHG19A3A021108	9.46302e-05	3.70586	up	noncoding	uc009vwn.1	AK309744	UCSC_knowngene	1138	chr1	+	43585818	43611958	ATGTGTCCAGATCCTGACCAGATGATAGCATCACATGAACACATGACATTAAGAAGTGCT	intergenic							126.973	40.9417	7.08846	5.19865	131.469	130.135	119.315	36.0396	38.8891	39.6104	49.2277	7.12482	7.11217	7.02838	5.40895	5.19552	5.00022	5.1899
ASHG19A3A031891	4.15926e-05	6.22594	up	noncoding	ENST00000404930	RP3-359N14.1	Ensembl	1673	chr6	+	106114200	106115873	AAACTCAATACCCTTAAAGACAGACACTCCACCAAAGTCTGTACCAATCAATGTAATCTC	intergenic							712.778	117.062	9.41894	6.78065	677.847	721.642	738.844	106.819	121.417	119.055	120.957	9.33685	9.4204	9.49957	6.76483	6.83392	6.62963	6.89421
ASHG19A3A012081	0.00691401	2.86635	up	noncoding	ENST00000425003	RP11-192I3.2	Ensembl	2433	chr1	-	228163045	228165866	AAGTGTGCCATGTGTGATGGGGACAGCTTCCCCTTTGCCTGTACAGGTGGAGAAGCTGAG	intergenic							317.162	122.707	8.33001	6.8108	330.057	308.535	312.895	76.7078	143.231	128.152	142.739	8.3774	8.2737	8.33893	7.01909	6.94309	6.13978	7.14121
ASHG19A3A051064	0.00283129	2.01928	up	noncoding	AK095250		misc_RNA	3037	chr14	-	92223102	92226142	AATCAGTGACTGCAACCCATGCTTGTTGGCAGGTTCTTATACAACCCACTATGAGTTAGC	intergenic							81.5551	49.2458	6.48556	5.47172	83.296	77.6031	83.7663	62.0503	43.6782	46.1218	45.1329	6.50573	6.40239	6.54857	5.28146	5.42582	5.81772	5.36188
ASHG19A3A016794	8.43932e-05	2.50324	up	noncoding	NR_026584	BZW1L1	RefSeq_NR	2505	chr2	+	201681858	201688559	ACTGTGGAATGGAACAAAAAAGAGGAGCTTGTAGCAGAGCAAGCCATCAAGCACTTGAAG	exon sense-overlapping	NM_014670	BZW1	basic leucine zipper and W2 domain-containing	+	201676646	201688560	8105.81	2684.44	12.8151	11.4913	8199.26	8569.99	7548.17	2601.72	2636.44	2597.34	2902.26	12.8044	12.8905	12.7506	11.5553	11.4567	11.447	11.5062
ASHG19A3A042292	0.000188463	4.78005	up	noncoding	ENST00000400934	RP11-551G24.2	Ensembl	1215	chr1	+	247206092	247207326	TTGATATAGGTGCAGTATATTCCCACAGACCCAATCAACACAATACAGTGAGGCTGGGAG	intronic antisense	NM_033213	ZNF670	zinc finger protein 670 isoform 1	-	247197939	247242115	474.936	104.853	8.87067	6.61364	509.612	476.488	438.707	101.58	111.628	107.389	98.8154	8.95396	8.86224	8.79581	6.45146	6.67741	6.55718	6.76852
ASHG19A3A042292	0.000188463	4.78005	up	noncoding	ENST00000400934	RP11-551G24.2	Ensembl	1215	chr1	+	247206092	247207326	TTGATATAGGTGCAGTATATTCCCACAGACCCAATCAACACAATACAGTGAGGCTGGGAG	intronic antisense	NM_001204220	ZNF670	zinc finger protein 670 isoform 2	-	247197939	247242115	474.936	104.853	8.87067	6.61364	509.612	476.488	438.707	101.58	111.628	107.389	98.8154	8.95396	8.86224	8.79581	6.45146	6.67741	6.55718	6.76852
ASHG19A3A039625	0.0253745	2.92479	up	noncoding	G36665		misc_RNA	408	chr1	+	212115060	212115468	AGGTTCAACCCTTTGCTCCATCTCATTGGTCATGTTGTCAATGGGTATCTGCAATGAAAC	natural antisense	NM_001199809	INTS7	integrator complex subunit 7 isoform 4	-	212113740	212209002	191.62	81.4154	7.64747	6.09914	184.793	209.758	180.307	149.128	65.1097	53.8807	57.5434	7.59149	7.75794	7.59298	5.64737	5.65737	7.12697	5.96483
ASHG19A3A039625	0.0253745	2.92479	up	noncoding	G36665		misc_RNA	408	chr1	+	212115060	212115468	AGGTTCAACCCTTTGCTCCATCTCATTGGTCATGTTGTCAATGGGTATCTGCAATGAAAC	natural antisense	NM_015434	INTS7	integrator complex subunit 7 isoform 1	-	212113740	212209002	191.62	81.4154	7.64747	6.09914	184.793	209.758	180.307	149.128	65.1097	53.8807	57.5434	7.59149	7.75794	7.59298	5.64737	5.65737	7.12697	5.96483
ASHG19A3A039625	0.0253745	2.92479	up	noncoding	G36665		misc_RNA	408	chr1	+	212115060	212115468	AGGTTCAACCCTTTGCTCCATCTCATTGGTCATGTTGTCAATGGGTATCTGCAATGAAAC	natural antisense	NM_001199811	INTS7	integrator complex subunit 7 isoform 2	-	212113740	212209002	191.62	81.4154	7.64747	6.09914	184.793	209.758	180.307	149.128	65.1097	53.8807	57.5434	7.59149	7.75794	7.59298	5.64737	5.65737	7.12697	5.96483
ASHG19A3A039625	0.0253745	2.92479	up	noncoding	G36665		misc_RNA	408	chr1	+	212115060	212115468	AGGTTCAACCCTTTGCTCCATCTCATTGGTCATGTTGTCAATGGGTATCTGCAATGAAAC	natural antisense	NM_001199812	INTS7	integrator complex subunit 7 isoform 3	-	212113740	212209002	191.62	81.4154	7.64747	6.09914	184.793	209.758	180.307	149.128	65.1097	53.8807	57.5434	7.59149	7.75794	7.59298	5.64737	5.65737	7.12697	5.96483
ASHG19A3A026000	0.00146789	2.44967	up	noncoding	ENST00000429329	RP11-662G20.1	Ensembl	489	chr4	+	127484663	127885745	TGGATTGCTTCATGTGTGCTATGCTCCAGCATTTGAAACAGTTGAAGAAACTAGAAAAAA	intergenic							358.254	156.137	8.49578	7.2032	385.714	355.008	334.04	122.946	166.92	155.912	178.769	8.58768	8.46713	8.43255	7.35347	7.24199	6.84128	7.37605
ASHG19A3A009350	0.000153592	3.06377	up	noncoding	AK024988		NRED	2100	chr17	+	29065199	29067280	CCATTGCAAGATATGTTTCTGTTGTCTGCATGGGTAGAGATAATTTTAAAAGCTTGGTTA	intergenic							933.565	293.038	9.78461	8.1693	941.875	959.912	898.907	257.608	282.997	301.906	329.64	9.77971	9.80605	9.76807	8.28444	8.24585	7.96624	8.18066
ASHG19A3A041411	0.000104786	2.02427	up	noncoding	ENST00000425821	RP4-604A21.1	Ensembl	327	chr1	-	29308795	29309122	GTCAAGTTTGAAAAGAGATAAAAGACAGGCAAGAACAAGTAGTTCTTCCAGAAGCTGTGG	intronic antisense	NM_004437	EPB41	protein 4.1 isoform 6	+	29213602	29446558	23053.3	8875.34	14.2715	13.2541	22552	21423	25184.9	9149.13	8801.49	8473.29	9077.44	14.2145	14.1733	14.4268	13.2223	13.1846	13.3171	13.2925
ASHG19A3A041411	0.000104786	2.02427	up	noncoding	ENST00000425821	RP4-604A21.1	Ensembl	327	chr1	-	29308795	29309122	GTCAAGTTTGAAAAGAGATAAAAGACAGGCAAGAACAAGTAGTTCTTCCAGAAGCTGTGG	intronic antisense	NM_001166005	EPB41	protein 4.1 isoform 1	+	29213602	29446558	23053.3	8875.34	14.2715	13.2541	22552	21423	25184.9	9149.13	8801.49	8473.29	9077.44	14.2145	14.1733	14.4268	13.2223	13.1846	13.3171	13.2925
ASHG19A3A041411	0.000104786	2.02427	up	noncoding	ENST00000425821	RP4-604A21.1	Ensembl	327	chr1	-	29308795	29309122	GTCAAGTTTGAAAAGAGATAAAAGACAGGCAAGAACAAGTAGTTCTTCCAGAAGCTGTGG	intronic antisense	NM_203343	EPB41	protein 4.1 isoform 2	+	29213602	29446558	23053.3	8875.34	14.2715	13.2541	22552	21423	25184.9	9149.13	8801.49	8473.29	9077.44	14.2145	14.1733	14.4268	13.2223	13.1846	13.3171	13.2925
ASHG19A3A041411	0.000104786	2.02427	up	noncoding	ENST00000425821	RP4-604A21.1	Ensembl	327	chr1	-	29308795	29309122	GTCAAGTTTGAAAAGAGATAAAAGACAGGCAAGAACAAGTAGTTCTTCCAGAAGCTGTGG	intronic antisense	NM_001166007	EPB41	protein 4.1 isoform 5	+	29213602	29446558	23053.3	8875.34	14.2715	13.2541	22552	21423	25184.9	9149.13	8801.49	8473.29	9077.44	14.2145	14.1733	14.4268	13.2223	13.1846	13.3171	13.2925
ASHG19A3A041411	0.000104786	2.02427	up	noncoding	ENST00000425821	RP4-604A21.1	Ensembl	327	chr1	-	29308795	29309122	GTCAAGTTTGAAAAGAGATAAAAGACAGGCAAGAACAAGTAGTTCTTCCAGAAGCTGTGG	intronic antisense	NM_001166006	EPB41	protein 4.1 isoform 3	+	29241087	29391733	23053.3	8875.34	14.2715	13.2541	22552	21423	25184.9	9149.13	8801.49	8473.29	9077.44	14.2145	14.1733	14.4268	13.2223	13.1846	13.3171	13.2925
ASHG19A3A041411	0.000104786	2.02427	up	noncoding	ENST00000425821	RP4-604A21.1	Ensembl	327	chr1	-	29308795	29309122	GTCAAGTTTGAAAAGAGATAAAAGACAGGCAAGAACAAGTAGTTCTTCCAGAAGCTGTGG	intronic antisense	NM_203342	EPB41	protein 4.1 isoform 4	+	29213602	29446558	23053.3	8875.34	14.2715	13.2541	22552	21423	25184.9	9149.13	8801.49	8473.29	9077.44	14.2145	14.1733	14.4268	13.2223	13.1846	13.3171	13.2925
ASHG19A3A054165	0.00171113	2.71544	up	noncoding	NR_028103	DCAF8	RefSeq_NR	4201	chr1	-	160185504	160232318	CCCTGTACGTTCTTATCTGCAGGTGAAGATGCAGTTGTTTTCACCATTGACCTGAGACAA	exon sense-overlapping	NM_015726	DCAF8	DDB1- and CUL4-associated factor 8	-	160185504	160232350	72.1642	33.0357	6.31539	4.8742	73.1465	69.3146	74.0314	33.0878	29.7539	39.3476	29.9535	6.3263	6.24812	6.37174	4.65674	5.18537	4.86699	4.78771
ASHG19A3A032203	0.000117192	2.53207	up	noncoding	ENST00000440904	MTX1P1	Ensembl	838	chr1	+	155200765	155204116	TTTTTGGATAGACACCAAGAACTACGTAGAAGTGACCCGGAAGTGGTATGCAGAGGCTAT	intergenic							1895.91	667.05	10.7661	9.42581	1798.95	2000.22	1888.56	621.528	653.802	702.05	690.822	10.6669	10.8305	10.801	9.41692	9.52448	9.31303	9.4488
ASHG19A3A024705	0.00240285	4.19781	up	noncoding	ENST00000510579	RP11-399F2.1	Ensembl	950	chr4	-	126644421	126645371	AAATTGTGTCAGAGCAATCCTAAATATTGTCCTGAGAAGACAGCTTTGGCTGACACCTAA	intergenic							41.4793	13.5899	5.55054	3.48091	44.9226	38.7897	40.7257	9.63694	16.6282	14.7862	13.3083	5.63291	5.47092	5.5478	3.35823	3.68194	2.97558	3.90787
ASHG19A3A018085	0.000134434	6.45926	up	noncoding	ENST00000324717	PTMAP3	Ensembl	327	chr20	+	17992599	17992928	CCGAAATCACCACCAAGGACTTAAAGAAGAAGGAAGCTGTGGAGGAAGCGGAAAATGGAA	intergenic							3457.2	480.928	11.6129	8.92149	3809.52	3136.46	3425.62	534.935	522.572	422.68	443.525	11.7307	11.4622	11.6457	8.73608	8.74635	9.09262	9.11091
CUST_136_PI426073487	0.0244706	2.58823	up	noncoding	uc.138+	uc.138	UCR	419	chr3	+	185649295	185649714	CGACTTCCGCATTTTCCTTCTTCAACATTAACCTTAATAGAAAAAGAACAGGATGAAGAA	intronic antisense	NM_004593	TRA2B	transformer-2 protein homolog beta	-	185632357	185655924	41.7824	22.3555	5.55876	4.1868	44.7876	36.9103	43.6492	34.6222	13.5037	23.8806	17.4154	5.62729	5.40533	5.64367	3.80676	4.43796	4.94041	3.56206
ASHG19A3A007357	0.000286897	2.1384	up	noncoding	NR_024603	MPDU1	RefSeq_NR	1629	chr17	+	7486964	7491525	GGCATTGTGGCTGGCTCACTTCTAGCTGCCCCAGGTGTTTAAAATCCTGGGAGCCAAGAG	exon sense-overlapping	NM_004870	MPDU1	mannose-P-dolichol utilization defect 1 protein	+	7486964	7491527	512.236	241.282	8.9706	7.87407	542.013	493.551	501.144	225.488	252.729	219.675	267.236	9.03197	8.90815	8.97168	7.96624	7.75776	7.7573	8.01498
ASHG19A3A007357	0.000286897	2.1384	up	noncoding	NR_024603	MPDU1	RefSeq_NR	1629	chr17	+	7486964	7491525	GGCATTGTGGCTGGCTCACTTCTAGCTGCCCCAGGTGTTTAAAATCCTGGGAGCCAAGAG	natural antisense	NM_006942	SOX15	protein SOX-15	-	7491497	7493488	512.236	241.282	8.9706	7.87407	542.013	493.551	501.144	225.488	252.729	219.675	267.236	9.03197	8.90815	8.97168	7.96624	7.75776	7.7573	8.01498
ASHG19A3A014189	0.00017904	2.92995	up	noncoding	NR_027143	LOC440895	RefSeq_NR	871	chr2	-	111160495	111181393	ATGTTTTGGATGCCCAGTACAACAGAAATGTTCCATTTGAAACTCACCTCAGGCCATCAG	intergenic							333.124	122.607	8.39758	6.84671	339.749	342.532	317.093	120.337	129.009	111.135	129.946	8.4154	8.42044	8.35691	6.86505	6.72565	6.80747	6.98865
ASHG19A3A047447	3.23055e-05	3.84513	up	noncoding	ENST00000419107	RP11-472F19.1	Ensembl	107	chr1	-	78782840	78782947	TAACTAGCACAGGTTTTAGTGACAAACGGGCCCATTCCATGGACATAGATGACTTCCTCA	intergenic							4692.04	1049.07	12.0553	10.1123	4733.98	4716.28	4625.87	980.841	1009.96	1111.36	1094.11	12.0445	12.0499	12.0714	10.1175	10.2197	10.0122	10.0995
ASHG19A3A015831	1.49321e-05	2.31587	up	noncoding	ENST00000502958	AC092653.2	Ensembl	1623	chr2	+	73927555	73934687	ATAAGGAAAAACAGAACTTTTCACTCCAAAGACCCTGTGTTAGGCTCGGCAGAACTGGTG	natural antisense	NM_016347	NAT8B	probable N-acetyltransferase 8B	-	73927635	73928467	408.588	184.297	8.67602	7.46446	410.163	433.671	381.931	176.535	176.086	196.333	188.234	8.66938	8.73869	8.61998	7.42939	7.58621	7.387	7.45524
ASHG19A3A020031	0.000463898	7.90889	up	noncoding	ENST00000442797	AC007064.21	Ensembl	145	chr22	+	17318411	17318556	ACTGGGCTTACTTGGATGCTAGCAAAATGCAGGCTTACCAGGATATCAAAGCAAAGAAAG	intergenic							155.938	23.9484	7.36391	4.38044	161.188	169.686	136.939	29.6016	22.4495	23.2548	20.4876	7.40641	7.46832	7.21701	4.06174	4.39196	4.70347	4.36459
ASHG19A3A025767	0.000809138	3.14681	up	noncoding	ENST00000480094	RP11-397E7.1	Ensembl	844	chr4	+	87791343	87792187	AGAAATCTGTCACTGCCACCTCAACCAAAATTGATAATCAGCAATGTAAAAATCCCAAAA	intergenic							5328.46	1465.41	12.2313	10.5774	5284.6	4843.04	5857.73	1958.8	1285.29	1174.49	1443.05	12.1957	12.0912	12.407	10.5343	10.2955	11.0286	10.4512
ASHG19A3A029173	1.0486e-06	3.26864	up	noncoding	ENST00000505273	RP11-267A15.2	Ensembl	288	chr5	+	173988778	173989066	AACAGACACACCTGCACAGTTGGAAATGGAGGATGGAGATACAATTGATGCGTTCCAACA	intergenic							43543.5	10362.7	15.1871	13.4784	45442.3	43767	41421.2	10103.2	10149.3	10315.6	10882.8	15.2085	15.1945	15.1583	13.4836	13.4782	13.4583	13.4935
ASHG19A3L0000423	0.0269872	2.27201	up	noncoding	AW892975	lincRNA-AMOTL1-1	lincRNA	457	chr11	-	94627686	94628135	CTGGTAGCCCCCTCAATTCCTTGTGGAAAAGATAAAAGATAAAAAACAAGCAAGCAAGAT	intergenic							290.185	139.422	8.19386	7.0099	303.423	328.163	238.969	186.501	137.588	102.107	131.493	8.25828	8.3612	7.9621	6.88527	6.60214	7.47029	7.08189
ASHG19A3A030739	0.000211745	7.134	up	noncoding	ENST00000392189	RP5-933K21.2	Ensembl	930	chr6	-	157787016	157787955	GACCAGGTTTCCAGGGAAATAAAAGAAAACTTCAAAGTGGAGACAAGAACCATTGCTGTT	intergenic							1743.21	232.124	10.6393	7.80461	1822.35	1723.85	1683.43	179.502	237.184	250.721	261.088	10.6844	10.6027	10.6309	7.933	7.96334	7.41477	7.90733
ASHG19A3A042895	0.0337965	3.07502	up	noncoding	ENST00000435088	RP11-227H15.7	Ensembl	386	chr10	-	71060187	71060573	CAACAATGCTGAAAAGAGAGACAAACACCAGGTTCTTAGGCCATGCTCCAAAGTCATCGT	intronic antisense	NM_033497	HK1	hexokinase-1 isoform HKI-ta/tb	+	71029755	71161637	2365.21	749.676	11.0814	9.46083	2347.09	2274.99	2473.54	303.943	888.365	908.93	897.467	11.0512	11.0115	11.1817	9.82223	9.90386	8.21337	9.90386
ASHG19A3A042895	0.0337965	3.07502	up	noncoding	ENST00000435088	RP11-227H15.7	Ensembl	386	chr10	-	71060187	71060573	CAACAATGCTGAAAAGAGAGACAAACACCAGGTTCTTAGGCCATGCTCCAAAGTCATCGT	intronic antisense	NM_033498	HK1	hexokinase-1 isoform HKI-ta/tb	+	71029755	71161637	2365.21	749.676	11.0814	9.46083	2347.09	2274.99	2473.54	303.943	888.365	908.93	897.467	11.0512	11.0115	11.1817	9.82223	9.90386	8.21337	9.90386
ASHG19A3A042895	0.0337965	3.07502	up	noncoding	ENST00000435088	RP11-227H15.7	Ensembl	386	chr10	-	71060187	71060573	CAACAATGCTGAAAAGAGAGACAAACACCAGGTTCTTAGGCCATGCTCCAAAGTCATCGT	natural antisense	NM_033500	HK1	hexokinase-1 isoform HKI-td	+	71029755	71161637	2365.21	749.676	11.0814	9.46083	2347.09	2274.99	2473.54	303.943	888.365	908.93	897.467	11.0512	11.0115	11.1817	9.82223	9.90386	8.21337	9.90386
ASHG19A3A052450	9.89833e-05	4.26484	up	noncoding	AL109717		misc_RNA	776	chr15	-	80135895	80136646	CATTATTCTTTGGATAGTAGCATAAATTTGATGTTTTATGTACAAAAGTAAAAACATTTG	exon sense-overlapping	NM_001199758	MTHFS	5-formyltetrahydrofolate cyclo-ligase isoform b	-	80135888	80189627	57.278	17.3366	5.98843	3.89594	52.0968	59.6818	60.0553	15.878	18.5329	17.7402	17.1955	5.84077	6.04326	6.08126	3.78929	3.97198	3.74384	4.07864
ASHG19A3A052450	9.89833e-05	4.26484	up	noncoding	AL109717		misc_RNA	776	chr15	-	80135895	80136646	CATTATTCTTTGGATAGTAGCATAAATTTGATGTTTTATGTACAAAAGTAAAAACATTTG	exon sense-overlapping	NM_006441	MTHFS	5-formyltetrahydrofolate cyclo-ligase isoform a	-	80135888	80189391	57.278	17.3366	5.98843	3.89594	52.0968	59.6818	60.0553	15.878	18.5329	17.7402	17.1955	5.84077	6.04326	6.08126	3.78929	3.97198	3.74384	4.07864
ASHG19A3A052450	9.89833e-05	4.26484	up	noncoding	AL109717		misc_RNA	776	chr15	-	80135895	80136646	CATTATTCTTTGGATAGTAGCATAAATTTGATGTTTTATGTACAAAAGTAAAAACATTTG	exon sense-overlapping	NM_001199760	ST20-MTHFS	ST20-MTHFS protein	-	80135888	80215448	57.278	17.3366	5.98843	3.89594	52.0968	59.6818	60.0553	15.878	18.5329	17.7402	17.1955	5.84077	6.04326	6.08126	3.78929	3.97198	3.74384	4.07864
ASHG19A3A042099	0.00698566	7.30736	up	noncoding	NR_028318	NLGN4Y	RefSeq_NR	5079	chrY	+	16634487	16955848	AGAAAAATTTGGATGTGTAAAAAGAACTCTTAACGGCGATGCAGGTCTTCCACAGCTAAG	exon sense-overlapping	NM_001164238	NLGN4Y	neuroligin-4, Y-linked isoform 2 precursor	+	16733900	16845429	70.3832	13.3961	6.24694	3.37759	65.9638	90.5947	54.5911	22.2917	8.97634	8.81503	13.5012	6.17432	6.61692	5.94958	3.38481	2.89588	4.26697	2.9627
ASHG19A3A042099	0.00698566	7.30736	up	noncoding	NR_028318	NLGN4Y	RefSeq_NR	5079	chrY	+	16634487	16955848	AGAAAAATTTGGATGTGTAAAAAGAACTCTTAACGGCGATGCAGGTCTTCCACAGCTAAG	exon sense-overlapping	NM_014893	NLGN4Y	neuroligin-4, Y-linked isoform 1 precursor	+	16635625	16955848	70.3832	13.3961	6.24694	3.37759	65.9638	90.5947	54.5911	22.2917	8.97634	8.81503	13.5012	6.17432	6.61692	5.94958	3.38481	2.89588	4.26697	2.9627
ASHG19A3A042099	0.00698566	7.30736	up	noncoding	NR_028318	NLGN4Y	RefSeq_NR	5079	chrY	+	16634487	16955848	AGAAAAATTTGGATGTGTAAAAAGAACTCTTAACGGCGATGCAGGTCTTCCACAGCTAAG	exon sense-overlapping	NM_001206850	NLGN4Y	neuroligin-4, Y-linked isoform 3	+	16634487	16955848	70.3832	13.3961	6.24694	3.37759	65.9638	90.5947	54.5911	22.2917	8.97634	8.81503	13.5012	6.17432	6.61692	5.94958	3.38481	2.89588	4.26697	2.9627
ASHG19A3A041183	0.0103477	2.26537	up	noncoding	Y11897		RNAdb	336	chrX	+	72900789	72901126	CCATATTCCGACCTGACTGAGGAGTTTTATCCAGTCACTTCTGTGTTACCTGTCATTTCC	exon sense-overlapping	NM_001039840	CHIC1	cysteine-rich hydrophobic domain 1 protein	+	72782983	72906937	85.5404	46.1935	6.54409	5.36435	94.4416	85.0721	77.1075	62.2273	41.8794	39.0455	41.6218	6.68064	6.52632	6.42532	5.1614	5.17418	5.82204	5.29977
ASHG19A3A028489	0.0402877	2.03906	up	noncoding	AF138860		misc_RNA	2614	chr5	+	87515920	87517070	ACAACTGTAGCAGCCACTGTGAAATCCACCAGCCACTGGTATTCTGGAAAGTAATGCAAT	natural antisense	NM_153354	TMEM161B	transmembrane protein 161B	-	87491022	87564665	38.4712	24.6453	5.4366	4.4087	43.5164	39.7581	32.1391	30.8264	25.5628	24.2369	17.9552	5.58858	5.50268	5.21855	3.85848	4.45743	4.76467	4.55422
ASHG19A3A039911	0.00475468	3.08581	up	noncoding	ENST00000452829	RP13-77O11.12	Ensembl	130	chrX	-	52830423	52830553	TGTGGAGTTGGCCCTGGTGTCCAGGGGGAAGATTCTGACAAAATGAGAGCAATTTAAAAT	intergenic							68.2081	28.8314	6.17737	4.55172	82.4968	40.6732	81.4544	35.4283	19.9781	15.8479	44.0713	6.49402	5.5311	6.50698	5.24607	3.79368	4.97295	4.19418
ASHG19A3A009432	0.000677785	2.01597	up	noncoding	ENST00000492524	RP11-19G24.2	Ensembl	524	chr17	+	35519529	35520053	AATTGTCTACTGTAGGTAGGTGTTTGAGAAATCCCCCCTGCAGGTGAAGAAATCTGGCAT	intronic antisense	NM_198836	ACACA	acetyl-CoA carboxylase 1 isoform 2	-	35441926	35716059	14306.7	5682.28	13.6028	12.5913	14255	14658.8	14006.3	4935.64	5909.73	5923.39	5960.38	13.5651	13.6299	13.6134	12.6054	12.6675	12.3953	12.6971
ASHG19A3A009432	0.000677785	2.01597	up	noncoding	ENST00000492524	RP11-19G24.2	Ensembl	524	chr17	+	35519529	35520053	AATTGTCTACTGTAGGTAGGTGTTTGAGAAATCCCCCCTGCAGGTGAAGAAATCTGGCAT	intronic antisense	NM_198837	ACACA	acetyl-CoA carboxylase 1 isoform 3	-	35441926	35656692	14306.7	5682.28	13.6028	12.5913	14255	14658.8	14006.3	4935.64	5909.73	5923.39	5960.38	13.5651	13.6299	13.6134	12.6054	12.6675	12.3953	12.6971
ASHG19A3A009432	0.000677785	2.01597	up	noncoding	ENST00000492524	RP11-19G24.2	Ensembl	524	chr17	+	35519529	35520053	AATTGTCTACTGTAGGTAGGTGTTTGAGAAATCCCCCCTGCAGGTGAAGAAATCTGGCAT	intronic antisense	NM_198838	ACACA	acetyl-CoA carboxylase 1 isoform 4	-	35441926	35656692	14306.7	5682.28	13.6028	12.5913	14255	14658.8	14006.3	4935.64	5909.73	5923.39	5960.38	13.5651	13.6299	13.6134	12.6054	12.6675	12.3953	12.6971
ASHG19A3A009432	0.000677785	2.01597	up	noncoding	ENST00000492524	RP11-19G24.2	Ensembl	524	chr17	+	35519529	35520053	AATTGTCTACTGTAGGTAGGTGTTTGAGAAATCCCCCCTGCAGGTGAAGAAATCTGGCAT	intronic antisense	NM_198839	ACACA	acetyl-CoA carboxylase 1 isoform 2	-	35441926	35766902	14306.7	5682.28	13.6028	12.5913	14255	14658.8	14006.3	4935.64	5909.73	5923.39	5960.38	13.5651	13.6299	13.6134	12.6054	12.6675	12.3953	12.6971
ASHG19A3A009432	0.000677785	2.01597	up	noncoding	ENST00000492524	RP11-19G24.2	Ensembl	524	chr17	+	35519529	35520053	AATTGTCTACTGTAGGTAGGTGTTTGAGAAATCCCCCCTGCAGGTGAAGAAATCTGGCAT	intronic antisense	NM_198834	ACACA	acetyl-CoA carboxylase 1 isoform 1	-	35441926	35766902	14306.7	5682.28	13.6028	12.5913	14255	14658.8	14006.3	4935.64	5909.73	5923.39	5960.38	13.5651	13.6299	13.6134	12.6054	12.6675	12.3953	12.6971
ASHG19A3A052702	0.000371104	26.7147	up	noncoding	NR_026771	DKFZP434L187	RefSeq_NR	4303	chr15	+	30488238	30506741	GGTGACTTAACTTGCAAAAGATGATCATATGTGAGAACGGATGTCTCAAATTAGGAAATA	intergenic							274.351	13.068	8.12766	3.3881	281.618	274.966	266.47	10.044	8.16947	17.2807	16.778	8.15007	8.11756	8.11534	3.74869	3.93172	3.03298	2.83899
ASHG19A3A035153	0.000253252	5.06602	up	noncoding	ENST00000501433	AC083868.1	Ensembl	1260	chr7	+	138706244	138720833	GTCAAACTGAAGCACTAAAAACATGTTGACCTTATATAACACATTCCTTAGGGGGAAAAA	natural antisense	NM_080660	ZC3HAV1L	zinc finger CCCH-type antiviral protein 1-like	-	138710451	138720775	214.52	48.7927	7.79982	5.45896	217.504	216.284	209.773	60.303	46.5131	41.9153	46.4393	7.80911	7.79757	7.79277	5.32307	5.28014	5.77395	5.4587
ASHG19A3A014180	0.00162502	4.47711	up	noncoding	ENST00000420753	AC013268.4	Ensembl	335	chr2	-	110769841	110770178	CTGCACAGCAGAATTTGTATTAGCATCCGATGTTAGAGAACTACAGAAACCTGGTCTCTC	intergenic							126.496	34.6767	7.08307	4.92051	129.957	130.859	118.671	48.7087	27.5498	31.7222	30.726	7.11016	7.11846	7.0206	4.69457	4.86228	5.45294	4.67223
ASHG19A3A020998	0.00209985	2.3585	up	noncoding	ENST00000391730	RP1-21K4.1	Ensembl	1133	chr1	+	42506267	42507400	AGATACATAGAACTATTCCTGAATTTGACAACAGGGGCTAGCAATGGGGCGTACAGCAGT	intergenic							735.18	304.942	9.45903	8.22116	748.175	717.793	739.571	261.889	299.618	359.851	298.408	9.46332	9.41331	9.50047	8.13857	8.49675	7.98894	8.26038
ASHG19A3A047470	0.00651736	9.67265	up	noncoding	ENST00000439132	RP11-548C21.1	Ensembl	1111	chr1	-	79520629	79521740	ACATGTCCTCAAACTTCCTGTCCAAGCCAGTGGATGTCCAAGTTTGGTGTGATTTTTGCT	intergenic							2260.78	254.896	11.0153	7.74134	2331.34	2378.89	2072.1	403.289	117.983	359.744	138.569	11.0423	11.0758	10.9277	6.97039	8.49606	8.6477	6.85121
ASHG19A3A031050	0.00152315	6.01287	up	noncoding	NR_015410	FLJ22536	RefSeq_NR	1904	chr6	+	21666674	22194614	AAAGTGTCCGAACGCCTCGTGGACTGCAGCGGGGGAAATGTCCCTTAAAAGTGCGACGAA	intergenic							168.116	34.3691	7.46949	4.88143	172.794	171.462	160.091	44.0799	23.8805	25.1379	44.3781	7.49813	7.48471	7.42562	5.25757	4.5115	5.30416	4.45251
ASHG19A3A008181	8.66513e-05	2.66705	up	noncoding	BC038430		RNAdb	4093	chr1	-	174964437	174968496	GTCAGGTGTAAGAAGTGTTACATAAACATTGGGTTCAAATGAGTCAGAATAAAGTCAACT	bidirectional	NM_014412	CACYBP	calcyclin-binding protein isoform 1	+	174968891	174981163	239.947	99.3324	7.94776	6.53251	241.264	244.975	233.601	98.5737	99.2495	103.604	95.903	7.94995	7.96361	7.92971	6.40585	6.62413	6.51203	6.58803
ASHG19A3A008181	8.66513e-05	2.66705	up	noncoding	BC038430		RNAdb	4093	chr1	-	174964437	174968496	GTCAGGTGTAAGAAGTGTTACATAAACATTGGGTTCAAATGAGTCAGAATAAAGTCAACT	bidirectional	NM_001007214	CACYBP	calcyclin-binding protein isoform 2	+	174968570	174981163	239.947	99.3324	7.94776	6.53251	241.264	244.975	233.601	98.5737	99.2495	103.604	95.903	7.94995	7.96361	7.92971	6.40585	6.62413	6.51203	6.58803
ASHG19A3A007698	1.38839e-05	4.26153	up	noncoding	NR_029466	COX7A2	RefSeq_NR	761	chr6	-	75947392	75953644	TTACTTGTAATTATTAGATTACCAAAAGGAGGATGATGAAATTCCACTGTATCTAAAGGG	exon sense-overlapping	NM_001865	COX7A2	cytochrome c oxidase subunit 7A2, mitochondrial	-	75947390	75953644	1009.79	228.783	9.88631	7.79493	1107.84	941.355	980.178	226.327	223.473	223.161	242.172	9.99418	9.77718	9.88755	7.81887	7.78354	7.76413	7.8132
ASHG19A3A013086	0.00306484	3.09251	up	noncoding	ENST00000366135	AC010525.1	Ensembl	501	chr19	+	56208087	56208594	ACACCCGGCCTGGGTATGTTGTGGGAGAGTCATTTCCCAGGAGGAAATGGGGACTGTTAC	intergenic							55.5042	23.4397	5.93447	4.3057	64.06	42.7132	59.7393	29.156	16.1375	18.2074	30.2577	6.1286	5.60145	6.07337	4.67	4.01314	4.68175	3.85788
ASHG19A3A043301	0.000644785	2.07045	up	noncoding	NR_026715	RPL13AP6	RefSeq_NR	653	chr10	-	112696360	112697013	AAACAGGCCAAGAGGAACATGGAGAAGAAAACTGACAAATACACAGAGGTCCTCAAGACC	intronic antisense	NM_007373	SHOC2	leucine-rich repeat protein SHOC-2	+	112679300	112773425	6713.28	2708.25	12.5528	11.5028	6599	6207.71	7333.13	2615.54	2712.61	2739.13	2765.74	12.5063	12.4469	12.705	11.479	11.529	11.4567	11.5466
ASHG19A3A051952	3.92985e-06	4.5544	up	noncoding	uc001zfv.1	DKFZp434L187	UCSC_knowngene	2072	chr15	-	32449488	32635000	GGGCTTTTTGTGCAAAAAGTTAGCTCTATAATCTGCATTTACCATGAGCATCTTCAGACT	natural antisense	NM_000746	CHRNA7	neuronal acetylcholine receptor subunit alpha-7	+	32322690	32462384	224.414	55.7891	7.85929	5.67203	224.219	222.305	226.72	57.1252	53.5654	56.1679	56.2978	7.85111	7.8357	7.89107	5.61389	5.71751	5.68821	5.66852
ASHG19A3A051952	3.92985e-06	4.5544	up	noncoding	uc001zfv.1	DKFZp434L187	UCSC_knowngene	2072	chr15	-	32449488	32635000	GGGCTTTTTGTGCAAAAAGTTAGCTCTATAATCTGCATTTACCATGAGCATCTTCAGACT	natural antisense	NM_001190455	CHRNA7	neuronal acetylcholine receptor subunit alpha-7	+	32322690	32462384	224.414	55.7891	7.85929	5.67203	224.219	222.305	226.72	57.1252	53.5654	56.1679	56.2978	7.85111	7.8357	7.89107	5.61389	5.71751	5.68821	5.66852
ASHG19A3A033360	6.4069e-06	2.76743	up	noncoding	ENST00000445285	AC078937.5	Ensembl	259	chr7	-	107283209	107283468	CCAAAGCCAAGCAGCCCCAGGACTGCTTTGGATGCATTCAAGAGTGGTGTGACGCCTTCT	intergenic							733.352	259.278	9.45675	7.9882	743.135	726.647	730.273	273.119	254.912	241.382	267.7	9.45439	9.43175	9.4841	7.96939	7.90237	8.05255	8.02851
ASHG19A3A029757	7.23869e-05	3.678	up	noncoding	ENST00000422088	MTCO3P1	Ensembl	832	chr6	-	32673900	32674732	AAGACCTCCGATACGGGATGCTCCTATTTATTACCTCAGAAGTATTCTTCTTCACTGGTT	intergenic							45940.2	9747.42	15.2612	13.3822	43702.7	49211.1	44906.9	8666.62	9767.67	10185.2	10370.2	15.1577	15.3495	15.2762	13.4086	13.4601	13.2358	13.4245
ASHG19A3A013933	0.0133333	2.14274	up	noncoding	ENST00000411597	AC078974.2	Ensembl	223	chr2	-	85295931	85296154	TATGTTGTAGCCCACTTCCACTACGTCTTATTAATAGGAGCCATATTCACTATTATAGGG	intergenic							17151.1	6519.66	13.8618	12.7624	14547.3	19181.6	17724.3	4556.54	7089.17	6844.77	7588.15	13.6051	14.0271	13.9533	12.9502	12.8714	12.2741	12.9537
ASHG19A3A037069	9.47137e-05	3.06746	up	noncoding	ENST00000433885	RP11-255J3.3	Ensembl	485	chr9	-	2900319	2900804	TTTGAGAAGAAGCTTAATGCCCTGAAGTTTCTGTGCCAGAGGATAAATATACTGCCCAGC	intergenic							1996.77	584.154	10.8404	9.22339	2058.83	1870.66	2060.8	602.206	567.182	592.767	574.46	10.867	10.7327	10.9216	9.13985	9.26177	9.26709	9.22486
ASHG19A3A031148	0.000170368	2.11882	up	noncoding	ENST00000401954	XXbac-BPG34I8.2	Ensembl	943	chr6	+	27490854	27492118	GACCAGGTGCCCACTTAACTGTGATAAAGATGTTAAAGAAGAACTGAAGAACATAAACTA	intergenic							12980.8	4989.59	13.4769	12.3936	13473.3	13047.2	12421.9	4762.33	5208.37	4653.64	5334.04	13.5009	13.476	13.4537	12.4325	12.2993	12.3458	12.4968
CUST_206_PI426073487	5.69187e-05	4.96473	up	noncoding	uc.208+	uc.208	UCR	218	chr7	+	23561669	23561887	CTGGAACATAAACCATACATTTACTTAACCTAGGACCCATTCATTCTTCCAGATTCTTTT	intronic antisense	NM_013293	TRA2A	transformer-2 protein homolog alpha	-	23544400	23571656	367.281	80.8817	8.53589	6.22418	363.218	361.03	377.596	85.695	70.8645	84.041	82.9261	8.50802	8.49476	8.6049	6.19267	6.30889	6.30716	6.08798
ASHG19A3A050292	0.00110592	2.47018	up	noncoding	ENST00000430033	RP11-474L7.4	Ensembl	557	chr13	+	74138380	74162207	CACAGGTGCATGCAGCTTTGCAATATAAGATTAAACTGTACAATGTTCTATAATCTCCAT	intergenic							133.754	63.3719	7.16087	5.85625	128.007	139.311	133.945	54.0594	58.8799	72.4432	68.1051	7.09054	7.20384	7.18822	5.89847	6.10116	5.61122	5.81416
ASHG19A3A040103	0.00335488	3.48602	up	noncoding	AK091999		misc_RNA	2613	chr1	+	219444115	219446727	CTAATCCCCACAGCACAAGTGGGAATTAATGTGTGCTCACTGATTCATGCTGGTTGAAGT	intergenic							36.3229	14.5918	5.36677	3.56519	36.3413	37.9301	34.6974	15.1197	11.135	11.4161	20.6965	5.33731	5.44123	5.32175	4.07799	3.26375	3.66345	3.25555
ASHG19A3H0000169	8.4106e-05	16.1361	up	noncoding	nc-HOXD10-7-	nc-HOXD10-7	HOX cluster	388	chr2	+	176974318	176974706	GGTTTCTAGTAAAATGGAGGTTACAGCTTCAATACACTGTATGAATTCTCCTCTTTGAGG	intergenic							263.712	19.3939	8.07097	4.05875	282.22	263.735	245.181	23.0421	16.8111	19.9768	17.7454	8.1527	8.06161	7.9986	3.83704	4.15843	4.31884	3.92071
ASHG19A3A025932	7.48865e-05	6.31857	up	noncoding	ENST00000504097	RP11-397D21.1	Ensembl	155	chr4	+	114761205	114761392	GTAGATTCACTTTCACCTGAGAATCCTCTGCAAGAACCATTTTAAAATGCGTGGAACTAT	intergenic							105.943	20.8896	6.83709	4.17749	110.569	113.408	93.8539	17.1006	20.824	21.3009	24.3329	6.8901	6.92245	6.69871	4.33894	4.25757	3.85759	4.25586
ASHG19A3A009560	0.000141195	6.06698	up	noncoding	uc010wia.1	AK027091	UCSC_knowngene	845	chr17	+	41381731	41382576	AAAGGAACCAGTTTGTAGAAAGCAGGAGAGGGTCCCATTGAACTTCAAGCCTTCAAGCTA	intergenic							3477.09	512.83	11.621	9.02003	3197.95	3846.61	3386.71	445.883	556.473	500.351	548.614	11.4863	11.7467	11.63	9.0666	9.01346	8.80175	9.1983
ASHG19A3A024728	0.000709372	3.70246	up	noncoding	ENST00000464513	RP11-745L13.1	Ensembl	581	chr4	-	132778487	132779068	TGTATTGTAAACTGAGCGTTCCTTACTGCATTGTCTAATGGAAGGCAAGCTTGAGACATC	intergenic							355.288	103.786	8.48071	6.59223	386.701	357.637	321.525	121.588	96.1497	100.628	96.7794	8.59141	8.47805	8.37268	6.41956	6.57947	6.8252	6.54469
ASHG19A3A023217	0.000430054	2.98983	up	noncoding	ENST00000508390	RP11-517B11.2	Ensembl	733	chr3	+	131245290	131246023	ACTTCTATGCCTTGGTGGCCCAGCGGCTGGAACAGCAAGAGCAACTGAAATCTCCGCCTA	intergenic							204.156	77.0104	7.73365	6.15358	220.068	207.445	184.957	81.8701	75.7584	65.9243	84.4889	7.82589	7.7474	7.62765	6.22228	5.96073	6.24078	6.19055
ASHG19A3A024107	0.00129115	5.07461	up	noncoding	ENST00000432257	RP4-763G1.1	Ensembl	728	chr1	+	67743734	67744462	CAGTTAATGTCTTTAACAATAAGTGTTAAGGAGCAGCTGCTGCACTTGGATAACAAGTAA	intergenic							151.134	36.3805	7.32054	4.97724	147.986	137.032	168.383	44.3832	28.6868	24.8448	47.6071	7.28513	7.18067	7.4958	5.36232	4.49457	5.31593	4.73613
ASHG19A3A047152	0.00308135	3.74784	up	noncoding	ENST00000441638	AP002856.7	Ensembl	569	chr11	+	131104432	131121711	ACTACCTGCAAAAACACTACTTAAGGTGTCGCCCCCTCTTCATGGGAGTAGACATATTCT	intergenic							880.003	235.851	9.70512	7.79907	900.63	902.491	836.888	339.007	216.797	179.506	208.094	9.71407	9.72407	9.67723	7.58769	7.45385	8.38486	7.76986
ASHG19A3A040026	7.66142e-05	2.7397	up	noncoding	ENST00000453086	RP5-1091N2.3	Ensembl	375	chrX	-	70236380	70236755	TAAAGAACATCAACGATGCTTTCACCAATGACATGTTCAGGCTTGCCCTGCACAACTTCG	intergenic							375.253	145.982	8.56498	7.11096	371.377	378.995	375.387	159.032	140.86	130.441	153.597	8.5385	8.55952	8.59693	7.12816	6.97016	7.2258	7.11972
ASHG19A3A033081	0.000243409	3.25555	up	noncoding	ENST00000443634	AC004862.5	Ensembl	282	chr7	-	80006869	80007151	TTGTTTGTTATGCTGCTGTTCACGGAGTCTCTCCAGATTGTCTGGTTTTCCTTACAGAGC	intergenic							810.881	244.909	9.59218	7.88928	823.508	768.879	840.256	266.982	212.079	220.86	279.715	9.58966	9.50452	9.68237	8.03783	7.76771	8.01583	7.73575
ASHG19A3A054858	3.23089e-06	2.08068	up	noncoding	ENST00000443090	RP4-702J19.1	Ensembl	522	chr1	-	168025138	168025660	TGTTATGAAGATGGTTGGCTGATCAAGATGACACTGAGTAACCCTTCAGAACTAGATGAA	intronic antisense	NM_001198956	DCAF6	DDB1- and CUL4-associated factor 6 isoform c	+	167905796	168045083	16529.7	6344.93	13.8132	12.7561	16575.9	16778.4	16234.7	6367.68	6213.15	6185.88	6613	13.7899	13.826	13.8237	12.7542	12.7332	12.7721	12.7651
ASHG19A3A054858	3.23089e-06	2.08068	up	noncoding	ENST00000443090	RP4-702J19.1	Ensembl	522	chr1	-	168025138	168025660	TGTTATGAAGATGGTTGGCTGATCAAGATGACACTGAGTAACCCTTCAGAACTAGATGAA	intronic antisense	NM_001198957	DCAF6	DDB1- and CUL4-associated factor 6 isoform d	+	167905796	168045083	16529.7	6344.93	13.8132	12.7561	16575.9	16778.4	16234.7	6367.68	6213.15	6185.88	6613	13.7899	13.826	13.8237	12.7542	12.7332	12.7721	12.7651
ASHG19A3A054858	3.23089e-06	2.08068	up	noncoding	ENST00000443090	RP4-702J19.1	Ensembl	522	chr1	-	168025138	168025660	TGTTATGAAGATGGTTGGCTGATCAAGATGACACTGAGTAACCCTTCAGAACTAGATGAA	intronic antisense	NM_018442	DCAF6	DDB1- and CUL4-associated factor 6 isoform a	+	167905796	168045083	16529.7	6344.93	13.8132	12.7561	16575.9	16778.4	16234.7	6367.68	6213.15	6185.88	6613	13.7899	13.826	13.8237	12.7542	12.7332	12.7721	12.7651
ASHG19A3A054858	3.23089e-06	2.08068	up	noncoding	ENST00000443090	RP4-702J19.1	Ensembl	522	chr1	-	168025138	168025660	TGTTATGAAGATGGTTGGCTGATCAAGATGACACTGAGTAACCCTTCAGAACTAGATGAA	intronic antisense	NM_001017977	DCAF6	DDB1- and CUL4-associated factor 6 isoform b	+	167905796	168045083	16529.7	6344.93	13.8132	12.7561	16575.9	16778.4	16234.7	6367.68	6213.15	6185.88	6613	13.7899	13.826	13.8237	12.7542	12.7332	12.7721	12.7651
ASHG19A3A010451	8.69021e-05	2.46239	up	noncoding	uc010dko.2	LOC339290	UCSC_knowngene	5487	chr18	+	5238098	5246503	GGTAACATACTAGCAGACCAGATAACTACTTATGCAAACCTCAGATAACCACTAATTTAA	intergenic							210.692	95.8201	7.77735	6.47729	217.559	207.484	207.035	95.3976	84.772	95.3432	107.768	7.8096	7.74767	7.77478	6.58787	6.50023	6.467	6.35404
ASHG19A3A024015	3.05081e-06	5.85194	up	noncoding	uc003gqk.2	BC014938	UCSC_knowngene	885	chr4	-	22328989	22341289	AATGGAGAAATGCTAACTTACAGAAAGGTCAGGTTGGTGTTTGAATGGTTTTAATTTCCT	intergenic							670.645	117.684	9.33719	6.78828	689.722	671.632	650.582	117.692	111.381	120.925	120.738	9.36056	9.32319	9.32783	6.76213	6.85748	6.76957	6.76393
ASHG19A3A049240	1.11039e-06	7.81055	up	noncoding	ENST00000446657	RP11-38M15.2	Ensembl	817	chr13	-	19298710	19299527	GTGTTTACCATGATGATAAGCAACCAGCATTTAGAGTTGTTTATGAAGCACTGAGAAATT	intergenic							424.99	59.2887	8.73005	5.76462	430.795	430.951	413.223	60.4881	58.6819	55.9582	62.0267	8.7397	8.72978	8.72066	5.75873	5.71104	5.77787	5.81086
ASHG19A3A040283	6.83701e-05	2.57687	up	noncoding	ENST00000430258	RP1-298J18.1	Ensembl	551	chrX	-	110867403	110867954	AAAGAAGATGAAGAAGTTTTCAGGGGAGATTGCCTACTCTGGGTGGGTGTTTGAGAAGTC	intergenic							8553.13	2751.66	12.8923	11.5267	8070.59	9106.94	8481.85	2572.57	2754.31	2872.16	2807.6	12.784	12.9741	12.919	11.5056	11.5993	11.4326	11.5694
ASHG19A3A025011	0.0214754	5.15381	up	noncoding	ENST00000503325	RP11-161D15.3	Ensembl	314	chr4	-	174903769	174912012	TCATGGAGCACTGACTACCATCTTCCCTGAACTCTTACGTGAGGAAGAACAAACCTCTAA	intergenic							151.109	42.3705	7.32426	4.95862	143.82	160.347	149.161	90.3772	31.61	16.4289	31.0657	7.2457	7.39331	7.33378	4.71326	3.85263	6.39103	4.87757
ASHG19A3A052205	0.00173188	3.45014	up	noncoding	ENST00000396071	AC092868.2	Ensembl	777	chr15	-	59693421	59694203	CTTACCATAAACAGGGCCATGCTGAGAAAATACAAATAAAAAAGACTATCAAGATGCATG	intergenic							87.3587	31.7492	6.57704	4.79039	82.279	97.4784	82.3187	41.6919	25.6305	33.5161	26.1585	6.48894	6.71976	6.52243	4.44614	4.94078	5.21665	4.55797
ASHG19A3A052993	0.000234695	3.30722	up	noncoding	NR_003105	ZWILCH	RefSeq_NR	3289	chr15	+	66797430	66841816	GAGTGTGAATAACGGGAGAGATAATGTAGTTCTGTTTTTCACATGTGGTTCTGCGTTTCA	bidirectional	NM_000968	RPL4	60S ribosomal protein L4	-	66791652	66797193	30.0682	12.652	5.10221	3.37659	26.3523	33.7841	30.068	14.0864	10.7236	14.7454	11.0526	4.89068	5.28558	5.13037	3.07761	3.67742	3.54655	3.20478
ASHG19A3A052993	0.000234695	3.30722	up	noncoding	NR_003105	ZWILCH	RefSeq_NR	3289	chr15	+	66797430	66841816	GAGTGTGAATAACGGGAGAGATAATGTAGTTCTGTTTTTCACATGTGGTTCTGCGTTTCA	natural antisense	NM_207338	LCTL	lactase-like protein precursor	-	66840536	66857835	30.0682	12.652	5.10221	3.37659	26.3523	33.7841	30.068	14.0864	10.7236	14.7454	11.0526	4.89068	5.28558	5.13037	3.07761	3.67742	3.54655	3.20478
ASHG19A3A052993	0.000234695	3.30722	up	noncoding	NR_003105	ZWILCH	RefSeq_NR	3289	chr15	+	66797430	66841816	GAGTGTGAATAACGGGAGAGATAATGTAGTTCTGTTTTTCACATGTGGTTCTGCGTTTCA	exon sense-overlapping	NM_017975	ZWILCH	protein zwilch homolog	+	66797430	66841822	30.0682	12.652	5.10221	3.37659	26.3523	33.7841	30.068	14.0864	10.7236	14.7454	11.0526	4.89068	5.28558	5.13037	3.07761	3.67742	3.54655	3.20478
ASHG19A3A035108	0.00287882	3.20447	up	noncoding	AK022222		NRED	1934	chr7	+	134574564	134576496	TCTATTAGAGAGATTACAGTAAAAAATAACAATCAGCTCTCTGATGATCCTGTGAGGAGG	exon sense-overlapping	NM_033139	CALD1	caldesmon isoform 4	+	134576150	134655480	54.0444	21.8091	5.90147	4.22138	65.6787	50.1238	46.3308	15.6291	19.8389	27.345	24.4233	6.16704	5.81025	5.72711	4.34521	4.63672	3.7195	4.1841
ASHG19A3A035108	0.00287882	3.20447	up	noncoding	AK022222		NRED	1934	chr7	+	134574564	134576496	TCTATTAGAGAGATTACAGTAAAAAATAACAATCAGCTCTCTGATGATCCTGTGAGGAGG	exon sense-overlapping	NM_033140	CALD1	caldesmon isoform 5	+	134576150	134655480	54.0444	21.8091	5.90147	4.22138	65.6787	50.1238	46.3308	15.6291	19.8389	27.345	24.4233	6.16704	5.81025	5.72711	4.34521	4.63672	3.7195	4.1841
ASHG19A3A035108	0.00287882	3.20447	up	noncoding	AK022222		NRED	1934	chr7	+	134574564	134576496	TCTATTAGAGAGATTACAGTAAAAAATAACAATCAGCTCTCTGATGATCCTGTGAGGAGG	intron sense-overlapping	NM_033138	CALD1	caldesmon isoform 1	+	134464163	134655480	54.0444	21.8091	5.90147	4.22138	65.6787	50.1238	46.3308	15.6291	19.8389	27.345	24.4233	6.16704	5.81025	5.72711	4.34521	4.63672	3.7195	4.1841
ASHG19A3A035108	0.00287882	3.20447	up	noncoding	AK022222		NRED	1934	chr7	+	134574564	134576496	TCTATTAGAGAGATTACAGTAAAAAATAACAATCAGCTCTCTGATGATCCTGTGAGGAGG	intron sense-overlapping	NM_004342	CALD1	caldesmon isoform 2	+	134464163	134655480	54.0444	21.8091	5.90147	4.22138	65.6787	50.1238	46.3308	15.6291	19.8389	27.345	24.4233	6.16704	5.81025	5.72711	4.34521	4.63672	3.7195	4.1841
ASHG19A3A035108	0.00287882	3.20447	up	noncoding	AK022222		NRED	1934	chr7	+	134574564	134576496	TCTATTAGAGAGATTACAGTAAAAAATAACAATCAGCTCTCTGATGATCCTGTGAGGAGG	intron sense-overlapping	NM_033157	CALD1	caldesmon isoform 3	+	134464163	134655480	54.0444	21.8091	5.90147	4.22138	65.6787	50.1238	46.3308	15.6291	19.8389	27.345	24.4233	6.16704	5.81025	5.72711	4.34521	4.63672	3.7195	4.1841
ASHG19A3A037411	5.45194e-06	10.1657	up	noncoding	ENST00000448132	RP11-2L13.1	Ensembl	400	chr1	+	199721618	199722018	TCTACAAACAGTACTTCAAGAGTAGTTTTCCTGCAAGTGCTGCTTACCTGGTTGCTGCTT	intergenic							1979.33	186.773	10.8284	7.48274	2051	1929.51	1957.46	188.793	190.311	162.257	205.731	10.8609	10.777	10.8472	7.56992	7.3016	7.48897	7.57048
ASHG19A3H0000105	0.00450059	2.20271	up	noncoding	nc-HOXC10-126-	nc-HOXC10-126	HOX cluster	228	chr12	+	54377223	54377451	ATAACCCCCATGCTGAGGCCACGGTGACCCTGCATATGAAAACACAAAACCATTTCAAAT	intergenic							210.236	107.834	7.77419	6.63491	221.634	209.228	199.846	79.8042	117.738	101.722	132.073	7.83664	7.75559	7.73033	6.89279	6.59567	6.20238	6.84878
ASHG19A3A047892	0.00307516	2.5294	up	noncoding	ENST00000415219	RP11-76N22.1	Ensembl	320	chr1	-	88964039	88964359	AAAGTGAAGAAGGGAAACTGTCTACCTCTCAAGACGCTGCTTGTAAAGACTTGGAAGAGG	intergenic							133.27	62.2348	7.15273	5.81394	128.117	146.551	125.143	44.7234	62.643	69.0772	72.4957	7.09167	7.27215	7.09438	5.98888	6.02782	5.32804	5.91102
ASHG19A3A026077	0.0321104	3.08722	up	noncoding	BC029602		misc_RNA	1630	chr4	+	142128796	142130410	TTCCCGACACCCACCAAGAAAGGGAGGACTGGAGTTATAATTAAAAGTTATAATTAAAAG	intergenic							54.2356	24.3468	5.9029	4.27659	64.2635	54.4054	44.038	43.5921	14.7125	20.6067	18.4758	6.13365	5.91789	5.65716	3.90158	4.20745	5.28722	3.71013
ASHG19A3A048824	1.47825e-05	9.59296	up	noncoding	ENST00000420836	AC005294.1	Ensembl	1083	chr12	+	68429546	68430635	ACTGTGGAGGAGGCAGATGCATGCATGGCCACACAAGGGGATGGAAGAGTTGTACAACCA	intergenic							547.275	60.6424	9.05723	5.79526	547.178	546.1	548.548	57.0342	56.6095	63.9074	65.0187	9.04494	9.03717	9.08959	5.82926	5.91111	5.68654	5.75412
ASHG19A3A026963	0.000157399	2.92538	up	noncoding	ENST00000509905	CTD-2001A16.1	Ensembl	910	chr5	-	75048394	75049304	AGCATTCTCAGAGGCATGGGTGGTGTTTCTATGCTTTTCTTATATGATAAAATAAAGAAG	intergenic							8298.88	2370.78	12.8532	11.3046	8577.49	8340.72	7978.45	2083.16	2252.12	2588.09	2559.76	12.8767	12.8525	12.8305	11.3719	11.4517	11.1219	11.2728
ASHG19A3A017342	0.00229867	3.50228	up	noncoding	ENST00000439121	RP5-859I17.2	Ensembl	144	chr20	-	8910541	8910685	GTTCCCTATGTACCTGTTACTATCAAAAATCTATAAACAGTCAATGTGGATGAGAGCTAA	intergenic							10374.2	2486.69	13.1581	11.3498	11291.6	9295.47	10535.7	3371.37	2236.58	2359.1	1979.71	13.253	13.0045	13.2169	10.9898	11.3157	11.8313	11.2626
ASHG19A3A043901	2.56562e-05	2.42436	up	noncoding	ENST00000406997	RP11-420K8.2	Ensembl	288	chr1	-	39769965	39770570	GATGACAAGGATTATTTCCTATTTAGAGACGGTGACATTCTTGGAAAGCACGTAGAGTGA	intronic antisense	NM_012090	MACF1	microtubule-actin cross-linking factor 1 isoform	+	39547088	39952810	87621.4	27482	16.1853	14.9077	89412.3	89314.3	84137.6	28144.5	26617.1	27168.2	27998.2	16.1705	16.2066	16.1789	14.8643	14.897	14.9894	14.8802
ASHG19A3A035029	0.000280381	3.50425	up	noncoding	ENST00000479267	RP11-274B21.1	Ensembl	829	chr7	+	128173705	128256024	CTGCACTAGAAAACAGTAAGAATTCTGACCTAGAGAAGAGGGAGGGAAGAATAGATGATT	intergenic							130.529	44.3859	7.12621	5.3171	141.426	125.864	124.296	36.4637	44.141	44.0902	52.8488	7.2274	7.06491	7.08631	5.52041	5.35564	5.01496	5.3774
ASHG19A3A020756	5.73939e-05	2.39275	up	noncoding	uc003bzh.3	AK096279	UCSC_knowngene	1876	chr3	-	14986197	14989931	ATGGAAACAATGCATTTGGCCCAGTGCTTTGTGGTTGTGTACTCTTTTTCTTTGTTTTTT	intronic antisense	NM_003298	NR2C2	nuclear receptor subfamily 2 group C member 2	+	14989235	15090780	689.074	281.721	9.37233	8.11366	696.651	711.75	658.822	270.741	283.616	271.197	301.329	9.37265	9.39953	9.34483	8.15215	8.08088	8.03847	8.18316
ASHG19A3A051505	0.00471191	3.33737	up	noncoding	NR_027468	FLJ39739	RefSeq_NR	1065	chr1	-	147906021	147931980	TCCTGAATTAAAACTGCAGAATGTGTTAAAGCATCATTCAACATCGTGAGCACATTTGAG	intergenic							28.3737	12.1096	5.0266	3.28789	25.9236	30.9421	28.2554	10.7149	8.42387	12.2867	17.013	4.86844	5.16813	5.04322	3.77209	3.37782	3.12329	2.87836
ASHG19A3A033677	0.000910883	2.29707	up	noncoding	ENST00000464866	AC073342.13	Ensembl	378	chr7	-	143009776	143010154	ACATATATCCCAGATTTCTGCAGCAGAAGATAATGACGAAAGTCTTCTTGGACACTTAAT	intergenic							15769.8	5536.17	13.7463	12.5465	16129.8	15897.1	15282.4	4588.56	5325.38	6047.14	6183.59	13.7577	13.7488	13.7324	12.659	12.7058	12.284	12.5372
ASHG19A3A021162	0.000246769	2.33677	up	noncoding	AF088004		misc_RNA	637	chr3	-	53847126	53847760	GATCAGAGTAAGAATGTCTTAAGAAGAGGTTTGTAAGGTCTTCATAACAAAGTGGTGTTT	intergenic							5473.35	1983.85	12.2733	11.0488	5419.62	5707.78	5292.64	2135.2	2010.86	1870.15	1919.17	12.2363	12.328	12.2557	10.9451	10.9826	11.1629	11.1046
ASHG19A3H0000080	0.00112022	5.27452	up	noncoding	nc-HOXA13-96-	nc-HOXA13-96	HOX cluster	318	chr7	-	27240358	27240676	TCAGTGTACACTGTGTGTGTGTGTGATGAGTCGTTCTGAGTCTATGGGTCTAAATGCAAA	intergenic							1197.47	223.659	10.1212	7.72213	1266.43	1199.04	1126.94	148.12	231.23	236.239	279.047	10.1763	10.1105	10.0767	8.03539	7.86869	7.11623	7.86821
ASHG19A3A040120	0.0028932	4.2851	up	noncoding	ENST00000395439	RP4-581F12.2	Ensembl	372	chrX	-	81761889	81762261	TGATTGGTTGCACGTAGTTGCTAAGAGAGTTATGAATTCCGTTACTTCCAAATTAACCAG	intergenic							2058.73	440.703	10.8693	8.76999	2462.39	1771.03	1942.75	538.594	353.97	491.281	378.968	11.1198	10.6487	10.8395	8.49464	8.97981	9.10154	8.50399
ASHG19A3A014419	0.000162988	41.72	up	noncoding	ENST00000431545	AC097523.2	Ensembl	765	chr2	-	139045598	139046363	GAGTGAAGAAAGCTATAAGGACTGTAAACTTATCATGCAGTTGTTACGTGATAATCTGAC	intergenic							448.531	13.1053	8.79885	3.41619	469.692	437.226	438.674	9.74028	13.5433	17.3765	11.7611	8.84884	8.75207	8.79566	3.16848	3.93839	2.99048	3.5674
ASHG19A3A045653	6.94406e-05	3.86096	up	noncoding	AK098142		misc_RNA	2364	chr11	-	106555150	106557515	AATGTACTACCCTGTATCTTCTTTGTGGACCTTAATCATTAGGTAACATTGGCCATAATA	intergenic							744.852	192.614	9.47624	7.52728	753.567	753.923	727.066	177.492	182.281	187.667	223.017	9.46999	9.4813	9.47744	7.6869	7.52057	7.39669	7.50497
ASHG19A3A007383	3.8568e-05	7.67477	up	noncoding	NR_026571	NOX4	RefSeq_NR	4386	chr11	-	89057523	89224653	TCACTACCTCCACCAGATGTTGGGGGATTGTGTCTAAGCAGAGCCTCAGCATCTGTTCTT	exon sense-overlapping	NM_001143837	NOX4	NADPH oxidase 4 isoform c	-	89057521	89322779	207.927	31.5999	7.75787	4.81774	226.027	205.025	192.729	30.3805	32.9772	31.2065	31.8355	7.86218	7.72803	7.6834	4.75038	4.83814	4.74293	4.93952
ASHG19A3A007383	3.8568e-05	7.67477	up	noncoding	NR_026571	NOX4	RefSeq_NR	4386	chr11	-	89057523	89224653	TCACTACCTCCACCAGATGTTGGGGGATTGTGTCTAAGCAGAGCCTCAGCATCTGTTCTT	exon sense-overlapping	NM_016931	NOX4	NADPH oxidase 4 isoform a	-	89057521	89224653	207.927	31.5999	7.75787	4.81774	226.027	205.025	192.729	30.3805	32.9772	31.2065	31.8355	7.86218	7.72803	7.6834	4.75038	4.83814	4.74293	4.93952
ASHG19A3A007383	3.8568e-05	7.67477	up	noncoding	NR_026571	NOX4	RefSeq_NR	4386	chr11	-	89057523	89224653	TCACTACCTCCACCAGATGTTGGGGGATTGTGTCTAAGCAGAGCCTCAGCATCTGTTCTT	exon sense-overlapping	NM_001143836	NOX4	NADPH oxidase 4 isoform b	-	89057521	89224653	207.927	31.5999	7.75787	4.81774	226.027	205.025	192.729	30.3805	32.9772	31.2065	31.8355	7.86218	7.72803	7.6834	4.75038	4.83814	4.74293	4.93952
ASHG19A3A028342	4.41501e-05	2.7587	up	noncoding	ENST00000508727	GUSBP1	Ensembl	4466	chr5	+	70074668	70159070	GCAGTACATATCGGTTATGATTCAAAAAATATAGCCCATTTCCAAAAACCTGCAACAAAG	intergenic							1397.12	464.103	10.334	8.86999	1425.72	1401.35	1364.29	442.787	445.182	484.662	483.78	10.3415	10.3187	10.3417	8.86965	8.96038	8.79127	8.85865
ASHG19A3A047924	0.000289039	4.97237	up	noncoding	NR_027157	LOC100128191	RefSeq_NR	3161	chr12	-	98906752	98910004	TAGCTACAGGTGGTTACTTGCAGATTTACTGCTGTAGAGCTCCAAAATTGAGATTACACT	natural antisense	NM_001032283	TMPO	thymopoietin isoform beta	+	98909350	98944157	80.9911	20.699	6.47255	4.15862	82.4508	83.2551	77.2674	16.3875	20.9208	20.6132	24.8744	6.49292	6.49633	6.4284	4.3732	4.20769	3.79017	4.26342
ASHG19A3A047924	0.000289039	4.97237	up	noncoding	NR_027157	LOC100128191	RefSeq_NR	3161	chr12	-	98906752	98910004	TAGCTACAGGTGGTTACTTGCAGATTTACTGCTGTAGAGCTCCAAAATTGAGATTACACT	natural antisense	NM_003276	TMPO	thymopoietin isoform alpha	+	98909350	98929412	80.9911	20.699	6.47255	4.15862	82.4508	83.2551	77.2674	16.3875	20.9208	20.6132	24.8744	6.49292	6.49633	6.4284	4.3732	4.20769	3.79017	4.26342
ASHG19A3A047924	0.000289039	4.97237	up	noncoding	NR_027157	LOC100128191	RefSeq_NR	3161	chr12	-	98906752	98910004	TAGCTACAGGTGGTTACTTGCAGATTTACTGCTGTAGAGCTCCAAAATTGAGATTACACT	natural antisense	NM_001032284	TMPO	thymopoietin isoform gamma	+	98909350	98944157	80.9911	20.699	6.47255	4.15862	82.4508	83.2551	77.2674	16.3875	20.9208	20.6132	24.8744	6.49292	6.49633	6.4284	4.3732	4.20769	3.79017	4.26342
ASHG19A3A024610	0.000200885	2.24104	up	noncoding	AK026192		misc_RNA	1493	chr4	-	110967005	110968478	TTGAAAACCACTGGAAGATTCAGCTTCTTGGGGACCTCAGAGCCCATATTCATATGGAAG	intergenic							1186.14	485.76	10.1075	8.94332	1213.12	1209.98	1135.33	502.574	492.01	443.495	504.963	10.1112	10.1232	10.088	8.93823	8.82159	8.99646	9.01699
ASHG19A3A052260	3.61073e-05	2.31242	up	noncoding	ENST00000507324	RP11-702L15.1	Ensembl	1005	chr15	-	64820865	64821870	TGTCAAGCTAATTTCCTGGTATGACAATGAATTTGGCTACAGCAACAGGGTGGTGCACCT	intronic antisense	NM_015042	ZNF609	zinc finger protein 609	+	64791618	64978266	161321	54208.5	17.0996	15.8902	163899	159890	160176	53286	54370.8	56943.9	52233.2	17.0629	17.0926	17.1432	15.7768	15.9559	15.9202	15.9078
ASHG19A3A014900	0.0314522	2.84581	up	noncoding	AX765689		misc_RNA	533	chr2	-	205410698	205912414	ATCCAGGATTCCTCCATCTGTATATTCTAAGTGATGAATCTTCACCCAGTAACCAGGACC	natural antisense	NM_057177	PARD3B	partitioning defective 3 homolog B isoform c	+	205410515	206480537	75.9082	35.9452	6.38553	4.87669	80.2974	72.9752	74.452	48.2643	15.216	44.7049	35.5955	6.45906	6.31854	6.379	4.92402	5.3797	5.43599	3.76706
ASHG19A3A014900	0.0314522	2.84581	up	noncoding	AX765689		misc_RNA	533	chr2	-	205410698	205912414	ATCCAGGATTCCTCCATCTGTATATTCTAAGTGATGAATCTTCACCCAGTAACCAGGACC	natural antisense	NM_152526	PARD3B	partitioning defective 3 homolog B isoform b	+	205410515	206480537	75.9082	35.9452	6.38553	4.87669	80.2974	72.9752	74.452	48.2643	15.216	44.7049	35.5955	6.45906	6.31854	6.379	4.92402	5.3797	5.43599	3.76706
ASHG19A3A014900	0.0314522	2.84581	up	noncoding	AX765689		misc_RNA	533	chr2	-	205410698	205912414	ATCCAGGATTCCTCCATCTGTATATTCTAAGTGATGAATCTTCACCCAGTAACCAGGACC	natural antisense	NM_205863	PARD3B	partitioning defective 3 homolog B isoform a	+	205410515	206480537	75.9082	35.9452	6.38553	4.87669	80.2974	72.9752	74.452	48.2643	15.216	44.7049	35.5955	6.45906	6.31854	6.379	4.92402	5.3797	5.43599	3.76706
ASHG19A3A021284	1.39447e-05	4.69519	up	noncoding	BC043430		RNAdb	1878	chr3	-	78969798	78971635	CGCCATAGAGAGGGTACTTATGCTATGGAAATTGTGTTTATATATATATGCATAATTGCC	intron sense-overlapping	NM_133631	ROBO1	roundabout homolog 1 isoform b	-	78646387	79068609	4305.26	799.646	11.9317	9.70053	4534.94	4303.05	4077.77	814.709	800.083	744.628	839.162	11.9816	11.9223	11.8913	9.70997	9.61237	9.73304	9.74675
ASHG19A3A021284	1.39447e-05	4.69519	up	noncoding	BC043430		RNAdb	1878	chr3	-	78969798	78971635	CGCCATAGAGAGGGTACTTATGCTATGGAAATTGTGTTTATATATATATGCATAATTGCC	intron sense-overlapping	NM_002941	ROBO1	roundabout homolog 1 isoform a precursor	-	78646387	79817059	4305.26	799.646	11.9317	9.70053	4534.94	4303.05	4077.77	814.709	800.083	744.628	839.162	11.9816	11.9223	11.8913	9.70997	9.61237	9.73304	9.74675
ASHG19A3A021284	1.39447e-05	4.69519	up	noncoding	BC043430		RNAdb	1878	chr3	-	78969798	78971635	CGCCATAGAGAGGGTACTTATGCTATGGAAATTGTGTTTATATATATATGCATAATTGCC	intron sense-overlapping	NM_001145845	ROBO1	roundabout homolog 1 isoform d	-	78646387	79068609	4305.26	799.646	11.9317	9.70053	4534.94	4303.05	4077.77	814.709	800.083	744.628	839.162	11.9816	11.9223	11.8913	9.70997	9.61237	9.73304	9.74675
ASHG19A3A034968	2.02867e-05	4.556	up	noncoding	ENST00000393396	RP11-3L10.1	Ensembl	315	chr7	+	121038507	121038824	GGAGAGGATACACTGATGGAGTATTTGGAGAATCCCAAGAAGCACATCTCTGGAACAAAG	intergenic							27130.4	4728.65	14.5037	12.316	28741.2	26709.2	25940.6	4587.74	4781.88	4822.75	4722.23	14.5612	14.4836	14.4663	12.2562	12.3565	12.2834	12.3677
ASHG19A3A037421	2.14229e-05	3.4301	up	noncoding	ENST00000421857	BX649597.4	Ensembl	1324	chr9	-	43425718	43427042	AGAAGATTGTGTCCTGGCTGGAATATGTCTAGTTTTTCCAATGAGGAAGCACAGAAGGCA	intergenic							1714.57	454.442	10.6166	8.83839	1782.94	1719.71	1641.05	442.79	462.038	450.789	462.152	10.6533	10.5986	10.5979	8.79742	8.84577	8.79156	8.91881
ASHG19A3A032105	0.0135912	2.17765	up	noncoding	ENST00000434255	RP1-32B1.4	Ensembl	216	chr6	+	135581133	135582071	TACATGATAGAGTGGAAGCCACAAAGGAAGAAGAAGAAGAGATTCTATCTGGGTATGGAG	intergenic							19.4872	12.7162	4.50718	3.3844	24.661	16.1261	17.6745	14.8096	10.66	13.7749	11.6202	4.79232	4.33635	4.39285	3.14903	3.56206	3.63104	3.19549
ASHG19A3L0001340	2.90326e-05	7.99934	up	noncoding	AK094780	lincRNA-GALNTL2-1	lincRNA	3105	chr3	+	15935568	16270147	GTACCAGCACAATTTGAGCATTCCCATTAACAAAGGTGTTCACAGTTGAGAAACTCTCCT	exon sense-overlapping	NM_054110	GALNTL2	polypeptide	+	16216183	16271253	497.574	66.4734	8.93273	5.93285	491.34	507.802	493.582	73.5198	69.4855	60.3507	62.5375	8.90261	8.94459	8.95098	5.77072	5.82186	6.07434	6.06446
ASHG19A3A010698	3.19241e-05	4.66237	up	noncoding	ENST00000419339	AC090771.1	Ensembl	834	chr18	+	57863786	57864620	TTAGGAGTGAAAAACCCACTACTAGAATTAACAGCTTTGGGAAATAAGCCATTAGATGAG	intergenic							398.517	92.4669	8.64334	6.42228	414.433	385.907	395.211	93.8217	80.7165	89.9598	105.37	8.68544	8.58199	8.6626	6.55078	6.41294	6.44288	6.28252
ASHG19A3A027254	0.000384074	3.24408	up	noncoding	ENST00000515849	CTNNAP1	Ensembl	2709	chr5	-	114725339	114728067	TTTGGCTGCTGTAGAATACGTTCGAAAACAAGGTGATTTGATGAAGACTGCTGCGGGAGA	intergenic							98.4114	37.1747	6.74369	5.04588	102.193	93.5878	99.4534	38.5656	30.8541	32.9827	46.2963	6.78953	6.66349	6.77806	5.31892	4.91897	5.10166	4.84398
ASHG19A3A029804	0.000750784	2.77674	up	noncoding	uc003oje.1	BC015662	UCSC_knowngene	1045	chr6	-	34212963	34214008	ACAACACAACTGTCCAGAGGTAGTTTGTGAACAGAGGAAAAATGGAACCAGAACCTTGGG	natural antisense	NM_145902	HMGA1	high mobility group protein HMG-I/HMG-Y isoform	+	34204649	34214008	46.4025	21.7611	5.70574	4.23234	48.8497	44.099	46.2589	19.2421	23.9027	18.1438	25.7559	5.75412	5.63868	5.72441	4.42349	4.00777	4.04385	4.45426
ASHG19A3A029804	0.000750784	2.77674	up	noncoding	uc003oje.1	BC015662	UCSC_knowngene	1045	chr6	-	34212963	34214008	ACAACACAACTGTCCAGAGGTAGTTTGTGAACAGAGGAAAAATGGAACCAGAACCTTGGG	natural antisense	NM_145903	HMGA1	high mobility group protein HMG-I/HMG-Y isoform	+	34204576	34214008	46.4025	21.7611	5.70574	4.23234	48.8497	44.099	46.2589	19.2421	23.9027	18.1438	25.7559	5.75412	5.63868	5.72441	4.42349	4.00777	4.04385	4.45426
ASHG19A3A029804	0.000750784	2.77674	up	noncoding	uc003oje.1	BC015662	UCSC_knowngene	1045	chr6	-	34212963	34214008	ACAACACAACTGTCCAGAGGTAGTTTGTGAACAGAGGAAAAATGGAACCAGAACCTTGGG	natural antisense	NM_145905	HMGA1	high mobility group protein HMG-I/HMG-Y isoform	+	34206567	34214008	46.4025	21.7611	5.70574	4.23234	48.8497	44.099	46.2589	19.2421	23.9027	18.1438	25.7559	5.75412	5.63868	5.72441	4.42349	4.00777	4.04385	4.45426
ASHG19A3A029804	0.000750784	2.77674	up	noncoding	uc003oje.1	BC015662	UCSC_knowngene	1045	chr6	-	34212963	34214008	ACAACACAACTGTCCAGAGGTAGTTTGTGAACAGAGGAAAAATGGAACCAGAACCTTGGG	natural antisense	NM_002131	HMGA1	high mobility group protein HMG-I/HMG-Y isoform	+	34204576	34214008	46.4025	21.7611	5.70574	4.23234	48.8497	44.099	46.2589	19.2421	23.9027	18.1438	25.7559	5.75412	5.63868	5.72441	4.42349	4.00777	4.04385	4.45426
ASHG19A3A029804	0.000750784	2.77674	up	noncoding	uc003oje.1	BC015662	UCSC_knowngene	1045	chr6	-	34212963	34214008	ACAACACAACTGTCCAGAGGTAGTTTGTGAACAGAGGAAAAATGGAACCAGAACCTTGGG	natural antisense	NM_145901	HMGA1	high mobility group protein HMG-I/HMG-Y isoform	+	34204649	34214008	46.4025	21.7611	5.70574	4.23234	48.8497	44.099	46.2589	19.2421	23.9027	18.1438	25.7559	5.75412	5.63868	5.72441	4.42349	4.00777	4.04385	4.45426
ASHG19A3A029804	0.000750784	2.77674	up	noncoding	uc003oje.1	BC015662	UCSC_knowngene	1045	chr6	-	34212963	34214008	ACAACACAACTGTCCAGAGGTAGTTTGTGAACAGAGGAAAAATGGAACCAGAACCTTGGG	natural antisense	NM_145899	HMGA1	high mobility group protein HMG-I/HMG-Y isoform	+	34204576	34214008	46.4025	21.7611	5.70574	4.23234	48.8497	44.099	46.2589	19.2421	23.9027	18.1438	25.7559	5.75412	5.63868	5.72441	4.42349	4.00777	4.04385	4.45426
ASHG19A3A035446	1.82758e-05	5.75874	up	noncoding	uc010lrc.1	BC037297	UCSC_knowngene	4012	chr8	-	325931	333174	AGGAAGTCACAGATCAGGCAACCAACCACACAAAGTTTCTAAGAGCAAACTGTTCAGGTC	intergenic							584.192	105.373	9.14735	6.6216	597.307	582.012	573.258	96.0557	103.778	108.209	113.451	9.16893	9.12368	9.14945	6.66461	6.68771	6.47633	6.65774
ASHG19A3A007264	0.000959028	6.52664	up	noncoding	NR_024191	ATL2	RefSeq_NR	2722	chr2	-	38522030	38604432	CACGTCTCGTCCACGACCTCCCTAGGATTCTCAAAGTTGGATTGGTGGAAACAATGAACC	exon sense-overlapping	NM_022374	ATL2	atlastin-2 isoform 1	-	38522028	38604432	314.048	55.054	8.31675	5.61041	329.525	317.278	295.343	76.6179	38.5725	52.3457	52.6799	8.3757	8.31482	8.25973	5.51534	5.6109	6.13805	5.17735
ASHG19A3A007264	0.000959028	6.52664	up	noncoding	NR_024191	ATL2	RefSeq_NR	2722	chr2	-	38522030	38604432	CACGTCTCGTCCACGACCTCCCTAGGATTCTCAAAGTTGGATTGGTGGAAACAATGAACC	exon sense-overlapping	NM_001135673	ATL2	atlastin-2 isoform 2	-	38522028	38604432	314.048	55.054	8.31675	5.61041	329.525	317.278	295.343	76.6179	38.5725	52.3457	52.6799	8.3757	8.31482	8.25973	5.51534	5.6109	6.13805	5.17735
ASHG19A3A026244	4.35947e-05	6.135	up	noncoding	ENST00000515074	RP11-686G17.1	Ensembl	1025	chr4	+	163243339	163245059	AAAGACCCATAACGCTGTTTCTCCAGACAGGGATGTTGATTGCTTTCATGTACTTAATGT	intergenic							767.804	126.941	9.51642	6.89936	775.866	798.992	728.555	117.923	137.099	127.375	125.367	9.51373	9.55456	9.48097	6.81396	6.93488	6.77269	7.07588
ASHG19A3A039412	0.000513181	10.1136	up	noncoding	ENST00000440492	RP11-288L9.1	Ensembl	441	chr1	-	27986838	27989233	ACAGACGGACGGATAAATGGCTGGAAGAGGAGTGATTGAAAAAATACATTTTAAAATGCC	intergenic							169.094	20.7035	7.47847	4.14025	174.125	165.224	167.932	15.0228	20.0866	26.6707	21.0342	7.50974	7.43368	7.49198	4.10407	4.60072	3.65429	4.20191
ASHG19A3A041165	0.00909547	14.2451	up	noncoding	ENST00000424182	RP11-402P6.6	Ensembl	230	chrX	+	71068624	71068854	CAAGTTCTACTCAGTGAATGTAGATTACAGCAAACTGAAGAAAAAATGTTGAGACTTCTG	intergenic							3924.89	307.395	11.7938	7.96137	4102.18	3625	4047.48	75.7285	350.535	371.107	432.212	11.8366	11.6655	11.8792	8.69141	8.544	6.12036	8.4897
ASHG19A3A043742	0.00495285	2.13461	up	noncoding	NR_024557	WAC	RefSeq_NR	3806	chr10	+	28821426	28909921	AGTGAGGAAAAGAAGGAAAGGGCAGACTGGTCGCGAAGAGAAGATCCAGGCCTCAGAGGA	exon sense-overlapping	NM_100486	WAC	WW domain-containing adapter protein with coiled-coil isoform 3	+	28822423	28909923	48.3146	28.7276	5.75391	4.65994	46.2154	53.836	44.8923	28.0234	34.3231	28.5434	24.0206	5.67431	5.90362	5.68381	4.31663	4.70294	4.62043	4.99975
ASHG19A3A043742	0.00495285	2.13461	up	noncoding	NR_024557	WAC	RefSeq_NR	3806	chr10	+	28821426	28909921	AGTGAGGAAAAGAAGGAAAGGGCAGACTGGTCGCGAAGAGAAGATCCAGGCCTCAGAGGA	exon sense-overlapping	NM_016628	WAC	WW domain-containing adapter protein with coiled-coil isoform 1	+	28822423	28909923	48.3146	28.7276	5.75391	4.65994	46.2154	53.836	44.8923	28.0234	34.3231	28.5434	24.0206	5.67431	5.90362	5.68381	4.31663	4.70294	4.62043	4.99975
ASHG19A3A016644	0.00369729	2.24254	up	noncoding	ENST00000416154	AC079305.5	Ensembl	562	chr2	+	178042422	178042984	AGAGGAAGAAGTACGACATCCCCAAATACCTGTGCTGTAAGATCAGTTTTGAGCTGATGC	intergenic							97.662	52.2105	6.72651	5.56137	85.3062	103.667	104.012	41.7048	55.9828	58.2957	52.8589	6.53769	6.80135	6.84049	5.52111	5.7695	5.21784	5.73706
ASHG19A3A007925	6.66677e-06	4.76468	up	noncoding	ENST00000417354	RP5-1116C7.1	Ensembl	568	chr1	-	172109460	172113934	CAGAGGAAACTAACCAACAGTGAGCATCTTCAACTAAAACTACCCCTGGATGTAATAAGT	intronic antisense	NM_015569	DNM3	dynamin-3 isoform a	+	171810620	172381857	830.975	173.327	9.6249	7.37252	796.919	891.238	804.768	167.445	176.314	180.548	168.999	9.54698	9.70917	9.61854	7.26449	7.46208	7.30656	7.45693
ASHG19A3A007925	6.66677e-06	4.76468	up	noncoding	ENST00000417354	RP5-1116C7.1	Ensembl	568	chr1	-	172109460	172113934	CAGAGGAAACTAACCAACAGTGAGCATCTTCAACTAAAACTACCCCTGGATGTAATAAGT	intronic antisense	NM_001136127	DNM3	dynamin-3 isoform b	+	171810620	172381857	830.975	173.327	9.6249	7.37252	796.919	891.238	804.768	167.445	176.314	180.548	168.999	9.54698	9.70917	9.61854	7.26449	7.46208	7.30656	7.45693
ASHG19A3A026805	0.0428694	2.77369	up	noncoding	ENST00000515565	RP11-175M2.2	Ensembl	1225	chr5	-	55134628	55135853	AAAGCAAATATGCAACACAGCTATGTAGAACCCTTCTTGAATTGTGCAGCAGGAGCCAGC	intergenic							27.5311	14.3575	4.98013	3.50832	32.3036	22.5406	27.7491	5	14.511	19.9709	17.948	5.17026	4.75199	5.01814	3.85759	4.15774	2.32974	3.68823
ASHG19A3A033827	0.00220587	5.82698	up	noncoding	ENST00000439089	AC093662.6	Ensembl	262	chr7	-	158415879	158416141	CAGATGGGGTATTCGATATTTAAAACAAAGTGCAGTTCCAACAATATTTTCTTTGCCTGA	intergenic							52.4817	12.3056	5.85585	3.3131	66.7144	45.4391	45.2918	17.132	9.6142	10.9583	11.5178	6.191	5.68082	5.69572	3.13566	3.20062	3.86042	3.0557
ASHG19A3A039582	0.00583769	2.66372	up	noncoding	ENST00000432945	AC002365.2	Ensembl	451	chrX	-	9833132	9833583	TTTTATGAGAGGCTTTGACTGTCTTGGGTGCTAGGCTGGGTGGACAGTTTTCATATCCTA	intronic antisense	NM_001649	SHROOM2	protein Shroom2	+	9754495	9917481	332.581	136.241	8.39317	6.97973	363.067	332.584	302.092	165.531	100.534	159.966	118.934	8.50736	8.38006	8.29209	6.73974	7.28148	7.28931	6.60838
ASHG19A3A033857	0.00264547	6.22123	up	noncoding	ENST00000423008	AC091729.9	Ensembl	1401	chr7	+	1200009	1204903	CGCAGCCGGGCGGGCGAGGAGCGGGGAAGCTGACTCAGGGCTGCGGCCGGGGTCCTGCGG	bidirectional	NM_182491	ZFAND2A	AN1-type zinc finger protein 2A	-	1192542	1199855	71.657	15.5011	6.29333	3.65613	84.8993	66.3073	63.7644	21.1597	15.9971	9.26829	15.5795	6.53027	6.18743	6.1623	3.62628	2.96841	4.18705	3.84279
ASHG19A3A022009	7.09199e-05	2.56333	up	noncoding	ENST00000426289	RP4-533D7.3	Ensembl	220	chr1	+	46570627	46570847	GTATGGACTTATGTAGCAACTCAAATTGGAATAGAATGGAACCTGTCCCCTGATGGGAGA	intronic antisense	NM_003629	PIK3R3	phosphatidylinositol 3-kinase regulatory subunit	-	46505811	46598380	19448.6	6018.98	14.0396	12.6816	20090.2	18447	19808.6	6109.87	5939.6	6070.23	5956.23	14.053	13.9589	14.1069	12.6046	12.7111	12.7058	12.7047
ASHG19A3A022009	7.09199e-05	2.56333	up	noncoding	ENST00000426289	RP4-533D7.3	Ensembl	220	chr1	+	46570627	46570847	GTATGGACTTATGTAGCAACTCAAATTGGAATAGAATGGAACCTGTCCCCTGATGGGAGA	intronic antisense	NM_001114172	PIK3R3	phosphatidylinositol 3-kinase regulatory subunit	-	46505811	46598708	19448.6	6018.98	14.0396	12.6816	20090.2	18447	19808.6	6109.87	5939.6	6070.23	5956.23	14.053	13.9589	14.1069	12.6046	12.7111	12.7058	12.7047
ASHG19A3A023417	0.00335242	2.86537	up	noncoding	ENST00000467158	CTD-2501O3.3	Ensembl	270	chr3	+	154375082	154375352	TATCCAGAAGAAATTTGACAGGAAGTACAATCCCATCCGGTATTGCATCATGTGGGGGAG	intergenic							238.679	95.0042	7.93897	6.42025	227.029	217.333	271.675	138.01	72.8673	85.2325	83.9072	7.86779	7.80666	8.14246	6.21286	6.33027	7.00917	6.12869
ASHG19A3A013214	0.00177864	2.66244	up	noncoding	ENST00000453806	AC114810.5	Ensembl	908	chr2	-	3485012	3486180	CGTTTTCCTCTTCTAGCAAAACAAAACAAAAAATTCTGCAATCATACAGGCAGTAGGAAA	intergenic							93.6798	43.0375	6.67778	5.26503	99.8928	93.6596	87.4869	32.2834	46.0533	43.8552	49.9582	6.76013	6.66506	6.60815	5.43297	5.34821	4.83521	5.44375
ASHG19A3A052838	0.000404225	4.15545	up	noncoding	uc001zsy.2	BC062349	UCSC_knowngene	1453	chr15	+	44068695	44070148	CCGGGAACCTTAACGTCCTCTACTACAAATAAAATTACCTATACATTTGTCAAAACTCAT	exon sense-overlapping	NM_001199877	SERF2	small EDRK-rich factor 2 isoform c	+	44069293	44088287	126.544	36.509	7.08465	5.02964	126.664	119.926	133.041	37.5078	31.1877	41.0472	36.2934	7.07685	6.99761	7.17947	4.9543	5.24635	5.05709	4.86083
ASHG19A3A052838	0.000404225	4.15545	up	noncoding	uc001zsy.2	BC062349	UCSC_knowngene	1453	chr15	+	44068695	44070148	CCGGGAACCTTAACGTCCTCTACTACAAATAAAATTACCTATACATTTGTCAAAACTCAT	natural antisense	NM_025165	ELL3	RNA polymerase II elongation factor ELL3	-	44064797	44069502	126.544	36.509	7.08465	5.02964	126.664	119.926	133.041	37.5078	31.1877	41.0472	36.2934	7.07685	6.99761	7.17947	4.9543	5.24635	5.05709	4.86083
ASHG19A3A028458	0.000254032	2.52113	up	noncoding	AK125939		misc_RNA	3744	chr5	+	81565519	81572664	TGGACAGCAAAATCCACATGTACTCAATACCTAGCTTAAATTATCAAAACACAACCAATC	natural antisense	NM_001025	RPS23	40S ribosomal protein S23	-	81569138	81574235	45.1363	23.1021	5.66553	4.33146	46.1912	47.5732	41.6444	21.0091	19.3371	26.4498	25.6124	5.67356	5.7451	5.57793	4.41566	4.58767	4.17651	4.146
ASHG19A3A014880	0.000264199	4.07084	up	noncoding	ENST00000405197	AC064836.3	Ensembl	704	chr2	-	203200746	203201450	CTGTCCCAAGAGCTAGATGAAGCCATTATGGCGGAAGAGAGTGGTGACATCATCTCTCTC	intergenic							145.499	42.2554	7.27254	5.24721	140.592	159.825	136.079	36.5577	43.861	40.2011	48.402	7.21948	7.38979	7.20835	5.3852	5.2171	5.0186	5.36796
ASHG19A3A026280	0.0196141	5.30946	up	noncoding	ENST00000512887	RP11-587O9.1	Ensembl	367	chr4	+	168569580	168569947	ATGCAATGTGCCATTCATCACTGGTAGCAAAGTAGAGAGAATGTCAGCATCTCTGCGCAT	intergenic							58.7128	16.4289	6.01973	3.61116	52.0734	64.701	59.364	5	11.4317	22.0693	27.2146	5.8401	6.15445	6.06463	4.50349	4.31395	2.32974	3.29747
ASHG19A3A035267	5.31982e-05	3.10573	up	noncoding	ENST00000423683	AC073310.3	Ensembl	1078	chr7	+	144702150	144703228	TATTCCTCTATCCTTGTTCTTTATCAGCACCAATGAAGCAAAGACCCCTGGCACAGCGTA	intergenic							3893.31	1076.01	11.7859	10.151	4062.9	3942.07	3674.97	1140.58	1034.47	1054.81	1074.17	11.824	11.7862	11.7476	10.0903	10.1399	10.2415	10.1321
ASHG19A3A040144	0.000422784	10.8303	up	noncoding	ENST00000446711	RP13-222H17.1	Ensembl	1161	chrX	-	90815436	90816597	CGCTTCATAAATCAAAGAGTGAAGAGACTCATGCTGAACTTGTCATTAAGGACCATCATT	intergenic							172.393	19.9101	7.50323	4.06623	184.391	154.019	178.769	28.6075	18.6128	16.2782	16.1421	7.58792	7.33884	7.58294	3.68596	3.8376	4.6543	4.08704
ASHG19A3A025130	0.011567	2.46455	up	noncoding	NR_027481	ZNF876P	RefSeq_NR	2621	chr4	+	206388	249771	AATTCATGCTGGAGAGAAACCCCTCATGTGAAGAACGTGTCAGAATCTTTACCTCATCCT	intergenic							189.591	89.3414	7.63373	6.33241	205.603	182.126	181.045	108.53	61.6134	111.306	75.9169	7.73613	7.56552	7.59955	6.0629	6.72928	6.65364	5.88381
ASHG19A3A053398	4.17921e-05	7.29795	up	noncoding	AL834536		misc_RNA	3284	chr16	-	2514950	2518214	AAAGAAACAACAAGGGCTCACCAAGTCCTACCTTGGCATGATTTAAATACATATGCTTTC	natural antisense	NM_025108	C16orf59	hypothetical protein LOC80178	+	2510114	2514964	1632.1	212.275	10.5472	7.67975	1794.25	1569.66	1532.38	223.29	199.448	217.306	209.057	10.664	10.4796	10.4981	7.59328	7.74154	7.74042	7.64377
ASHG19A3A054563	0.000132302	3.91225	up	noncoding	ENST00000447827	RP11-359K18.1	Ensembl	297	chr1	-	162511121	162511418	AAATATGACAGGATAAATTCTACCTTGAACCGTATCTGAAAGCGGTTACTTGGGAGAGAA	intergenic							1575.71	374.728	10.4976	8.5296	1563.22	1491.71	1672.2	453.077	379.485	336.101	330.249	10.4651	10.4051	10.6225	8.28687	8.39531	8.82682	8.60941
ASHG19A3A015588	0.000168816	4.22711	up	noncoding	ENST00000449397	AC019129.2	Ensembl	678	chr2	+	44393404	44394082	GTTCTAGGCGGCGTCTGTTAAAAAGCATTGCTGTCTGTTAATTTGACATGTGCAAGCCAG	intergenic							97.1131	28.387	6.72403	4.64435	102.024	90.8111	98.5047	31.4321	23.195	26.3836	32.5374	6.78698	6.6206	6.76451	4.78514	4.58352	4.79735	4.4114
ASHG19A3A007435	0.000278046	6.91334	up	noncoding	NR_026895	MUDENG	RefSeq_NR	2464	chr14	+	57735605	57756796	CACTTTGTGGCACCGTGAGATTCTCCAGTGTGATTTGGAAGGAATCATGCCAAATGTTAC	exon sense-overlapping	NM_018229	MUDENG	MHD domain-containing death-inducing protein	+	57735605	57756797	377.813	60.8498	8.57169	5.78231	397.741	370.27	365.427	60.9592	70.8952	44.6613	66.8834	8.62745	8.52953	8.55809	5.87172	5.37747	5.79121	6.08883
ASHG19A3A007435	0.000278046	6.91334	up	noncoding	NR_026895	MUDENG	RefSeq_NR	2464	chr14	+	57735605	57756796	CACTTTGTGGCACCGTGAGATTCTCCAGTGTGATTTGGAAGGAATCATGCCAAATGTTAC	natural antisense	NM_006544	EXOC5	exocyst complex component 5	-	57669193	57735617	377.813	60.8498	8.57169	5.78231	397.741	370.27	365.427	60.9592	70.8952	44.6613	66.8834	8.62745	8.52953	8.55809	5.87172	5.37747	5.79121	6.08883
ASHG19A3A013519	0.00551114	2.21161	up	noncoding	ENST00000449978	RP11-452J6.2	Ensembl	210	chr1	-	246795557	246795780	CTGTGGCGCACGTTGCCAAGCTCAAAAAGGCAAAGGCTAAAGAACATGCCGCTAAACTGG	intronic antisense	NM_152609	CNST	consortin isoform 1	+	246729638	246831884	3893.71	1534.74	11.7816	10.6365	3670.24	3611	4399.91	1481.26	1757.8	1041.02	1858.87	11.6754	11.6597	12.0096	10.8947	10.1156	10.6331	10.9025
ASHG19A3A013519	0.00551114	2.21161	up	noncoding	ENST00000449978	RP11-452J6.2	Ensembl	210	chr1	-	246795557	246795780	CTGTGGCGCACGTTGCCAAGCTCAAAAAGGCAAAGGCTAAAGAACATGCCGCTAAACTGG	intronic antisense	NM_001139459	CNST	consortin isoform 2	+	246729638	246811544	3893.71	1534.74	11.7816	10.6365	3670.24	3611	4399.91	1481.26	1757.8	1041.02	1858.87	11.6754	11.6597	12.0096	10.8947	10.1156	10.6331	10.9025
ASHG19A3A020853	5.97403e-05	2.02334	up	noncoding	ENST00000451877	AC104306.4	Ensembl	341	chr3	-	32634463	32634804	TTGGATAATGCGATAGAAGCTGTGGATGAATCTGCTTTTTTGGAAGGTACTTCGGGTCGA	intergenic							3759.36	1580.75	11.7322	10.7155	4021.84	3840.87	3415.37	1584.17	1407.3	1624.84	1706.68	11.8108	11.7449	11.6409	10.7698	10.7715	10.7224	10.5981
ASHG19A3A033063	0.00315412	4.14186	up	noncoding	ENST00000412399	SPDYE8P	Ensembl	783	chr7	-	76654007	76659889	TTTGGGAAAGATCATGATGAGCCATCAACCGCAGCCCCAGGAAGAGCGGAGCCCCCAGCG	intergenic							125.649	37.478	7.07348	5.02321	136.509	121.7	118.738	48.0958	23.2215	42.1186	36.4759	7.17973	7.01927	7.02145	4.96128	5.28778	5.43078	4.41298
ASHG19A3A007958	0.0107385	3.70255	up	noncoding	ENST00000441860	AC005773.1	Ensembl	458	chr17	-	14851057	14851515	GGCATACATTCCACTGTTTATCATGCTTTGGATATTGCCAACAAGATTGGGATCATCTAA	intergenic							635.376	188.771	9.26402	7.3755	625.679	641.233	639.214	337.49	158.58	124.507	134.508	9.23246	9.25474	9.30487	6.92245	6.90062	8.379	7.29994
ASHG19A3A014013	8.09309e-05	4.30567	up	noncoding	ENST00000338228	AC073464.11	Ensembl	816	chr2	-	95461549	95472196	TTCTCCAAACACCCATAAGAATTCCTATTTCAAGCCCACAGACTTCAAATAACTTCAAGA	intergenic							350.484	88.9317	8.46898	6.36275	346.158	355.518	349.776	102.927	86.8608	80.0587	85.8805	8.44365	8.46982	8.49348	6.2452	6.2402	6.57621	6.38938
ASHG19A3A030724	0.000574298	3.49832	up	noncoding	ENST00000403971	RP3-527B10.1	Ensembl	594	chr6	-	154259567	154260161	TGCTGCTGACTATAAGTTTCAAGGAAAGTTTGCTGGTGCAAAGGATCCTGCTAAAGTTGC	intergenic							304.594	95.1985	8.27201	6.46535	304.254	294.204	315.323	84.6988	98.5622	107.767	89.7666	8.26264	8.20453	8.34886	6.30989	6.68234	6.29175	6.57741
ASHG19A3A041643	8.16333e-06	5.64031	up	noncoding	ENST00000441721	RP1-169P22.1	Ensembl	562	chrX	+	143392256	143392818	GGCCTCACATTTTCCAATGAACTTATTAGCAGTGATGAGGGTTTACACTGTTACTTTGCT	intergenic							423.503	80.9653	8.72491	6.22914	430.837	408.866	430.806	88.0458	74.4398	76.7462	84.6296	8.74	8.66451	8.77024	6.22449	6.17964	6.34948	6.16294
ASHG19A3A052139	0.00205657	2.80013	up	noncoding	BC063881		NRED	2120	chr15	-	51587352	51589455	AATGTATGATCCTTCTTGGAGTAAAAAGCCTTCAGCAGTGCTTCACAAAAAATTCTATTG	intron sense-overlapping	NM_000103	CYP19A1	cytochrome P450 19A1	-	51500253	51630795	57.6321	26.3501	6.00079	4.51529	60.5151	56.2535	56.1276	20.252	23.6528	27.8943	33.6013	6.04617	5.96663	5.98957	4.83147	4.66781	4.12287	4.43903
ASHG19A3A052139	0.00205657	2.80013	up	noncoding	BC063881		NRED	2120	chr15	-	51587352	51589455	AATGTATGATCCTTCTTGGAGTAAAAAGCCTTCAGCAGTGCTTCACAAAAAATTCTATTG	intron sense-overlapping	NM_031226	CYP19A1	cytochrome P450 19A1	-	51500253	51630795	57.6321	26.3501	6.00079	4.51529	60.5151	56.2535	56.1276	20.252	23.6528	27.8943	33.6013	6.04617	5.96663	5.98957	4.83147	4.66781	4.12287	4.43903
ASHG19A3A037654	4.95874e-06	17.2917	up	noncoding	NR_027471	LOC440173	RefSeq_NR	2018	chr9	-	89623366	89657041	CCAACACCTCCACAAACAAATGGGAGCTTAATAGACTTTGCAAAATTACTTTTTATCCAG	intergenic							2312.63	130.224	11.0504	6.93839	2430.3	2257.78	2249.82	133.587	136.954	119.571	130.785	11.1003	11.003	11.0478	6.87742	6.84032	6.96096	7.07485
ASHG19A3A017977	1.51341e-06	3.22839	up	noncoding	NR_027700	NOP56	RefSeq_NR	2169	chr20	+	2633253	2639038	GATGGCCAGTCCTGGTGTCTGAGTGATTCCCAGGGCCCAGCAAAGGGACCAAGTTTCCAG	exon sense-overlapping	NM_006392	NOP56	nucleolar protein 56	+	2633253	2639039	1008.48	297.945	9.8896	8.19878	1023.63	1001.14	1000.67	298.479	297.893	288.704	306.704	9.89328	9.8582	9.91731	8.1776	8.17857	8.18752	8.25143
ASHG19A3A009385	5.2022e-07	5.68983	up	noncoding	BC016000		misc_RNA	1182	chr1	-	200374082	200375228	CTTAGGGCATCCAAATAAAAAACAATAGGGTAAACATCCCCAAAACCCACCTTTAAAAAA	intergenic							19467.1	2770.23	14.0458	11.5374	19805.5	19417.4	19178.4	2766.8	2789.73	2756.37	2768.04	14.0307	14.0416	14.065	11.481	11.5407	11.5404	11.5875
ASHG19A3A047275	3.42785e-05	18.2288	up	noncoding	ENST00000446582	RP4-595K12.2	Ensembl	744	chr1	-	76107028	76107772	CAAAAATCAAGCTCATATACACATGAAGAGTTTATGCCCGGAGACGATACTAATGTTAAG	intergenic							929.538	52.652	9.77182	5.58367	889.584	1015.24	883.791	52.5414	55.1034	45.3214	57.6419	9.69215	9.87723	9.74608	5.65006	5.39807	5.57094	5.71561
ASHG19A3A047315	0.00278503	4.1774	up	noncoding	NR_028045	KLRA1	RefSeq_NR	2208	chr12	-	10741077	10752434	TGACTCTTGGGATCCTCTGTTTACTTCTTCTGATGATAGTCACAGTGTTGGTGACAAATA	intergenic							149.255	43.5376	7.30853	5.24592	150.283	152.023	145.458	64.5128	34.5711	41.0598	34.0069	7.3061	7.31888	7.3006	4.84922	5.24708	5.87514	5.01225
ASHG19A3A000141	0.00872864	2.10994	up	noncoding	ENST00000420277	AC100775.1	Ensembl	435	chr18	+	54814543	54815062	TGCGGGCCCGGCCTCGACCCGGGCCAGCAGGGGCCTTTTTGACAGCTTCCGCCGGGACTG	intergenic							56.222	33.9651	5.96782	4.89062	54.4734	58.1547	56.0377	46.0622	26.21	28.4146	35.1737	5.90655	6.01044	5.98648	4.90491	4.69668	5.36906	4.59182
ASHG19A3A025962	3.05762e-05	8.23308	up	noncoding	AK021986		NRED	1914	chr4	+	119963178	119965092	TGCACAGGTTTGATGCCATGTGGTCAATGAATGACTGATCTGTTCATTGTATTTTGTTTG	intron sense-overlapping	NM_133477	SYNPO2	synaptopodin-2 isoform a	+	119809995	119982402	2918.43	326.974	11.3768	8.33532	2998.19	2970.49	2786.61	337.666	330.935	341.23	298.067	11.3903	11.3857	11.3543	8.13644	8.41525	8.37956	8.41005
ASHG19A3A045615	0.00407289	67.2494	up	noncoding	ENST00000454802	RP4-800M22.4	Ensembl	394	chr1	-	52655586	52655980	AAGAGAATGGGTCTCAAAATTCAAATTTTCTTGGGTGAAAAATACATCTGCAGGTTTCAG	intronic antisense	NM_004799	ZFYVE9	zinc finger FYVE domain-containing protein 9	+	52608045	52812358	2232.46	54.3415	11.0032	4.93177	2249.71	2148.99	2298.68	149.794	30.6266	12.738	24.2078	10.993	10.9373	11.0794	4.32848	3.43337	7.13335	4.83187
ASHG19A3A045615	0.00407289	67.2494	up	noncoding	ENST00000454802	RP4-800M22.4	Ensembl	394	chr1	-	52655586	52655980	AAGAGAATGGGTCTCAAAATTCAAATTTTCTTGGGTGAAAAATACATCTGCAGGTTTCAG	intronic antisense	NM_007323	ZFYVE9	zinc finger FYVE domain-containing protein 9	+	52608045	52729719	2232.46	54.3415	11.0032	4.93177	2249.71	2148.99	2298.68	149.794	30.6266	12.738	24.2078	10.993	10.9373	11.0794	4.32848	3.43337	7.13335	4.83187
ASHG19A3A045615	0.00407289	67.2494	up	noncoding	ENST00000454802	RP4-800M22.4	Ensembl	394	chr1	-	52655586	52655980	AAGAGAATGGGTCTCAAAATTCAAATTTTCTTGGGTGAAAAATACATCTGCAGGTTTCAG	intronic antisense	NM_007324	ZFYVE9	zinc finger FYVE domain-containing protein 9	+	52608045	52812358	2232.46	54.3415	11.0032	4.93177	2249.71	2148.99	2298.68	149.794	30.6266	12.738	24.2078	10.993	10.9373	11.0794	4.32848	3.43337	7.13335	4.83187
ASHG19A3A017444	0.0155533	2.06912	up	noncoding	uc002wsc.2	BC042893	UCSC_knowngene	5388	chr20	-	21134668	21198927	CAGTCACACAGGATTTAGGAGACAACTCCACTCCAGGCTATTGGGAACACTGAAATTAAG	natural antisense	NM_001163023	PLK1S1	centrosomal protein kizuna isoform 3	+	21106623	21227258	70.2133	42.6255	6.27271	5.22369	70.6417	62.6371	77.3611	59.4916	29.8771	42.6733	38.4597	6.27651	6.11055	6.43107	5.03832	5.308	5.75362	4.79482
ASHG19A3A017444	0.0155533	2.06912	up	noncoding	uc002wsc.2	BC042893	UCSC_knowngene	5388	chr20	-	21134668	21198927	CAGTCACACAGGATTTAGGAGACAACTCCACTCCAGGCTATTGGGAACACTGAAATTAAG	natural antisense	NM_001163022	PLK1S1	centrosomal protein kizuna isoform 2	+	21106623	21227258	70.2133	42.6255	6.27271	5.22369	70.6417	62.6371	77.3611	59.4916	29.8771	42.6733	38.4597	6.27651	6.11055	6.43107	5.03832	5.308	5.75362	4.79482
ASHG19A3A017444	0.0155533	2.06912	up	noncoding	uc002wsc.2	BC042893	UCSC_knowngene	5388	chr20	-	21134668	21198927	CAGTCACACAGGATTTAGGAGACAACTCCACTCCAGGCTATTGGGAACACTGAAATTAAG	natural antisense	NM_018474	PLK1S1	centrosomal protein kizuna isoform 1	+	21106623	21227258	70.2133	42.6255	6.27271	5.22369	70.6417	62.6371	77.3611	59.4916	29.8771	42.6733	38.4597	6.27651	6.11055	6.43107	5.03832	5.308	5.75362	4.79482
ASHG19A3A014980	0.000220453	3.01813	up	noncoding	ENST00000425162	AC073321.2	Ensembl	612	chr2	-	217475070	217475682	TGACTGATGACTTTGTGGTCAATGGCAGCTATGCCGAACAAATGTACGGAATGTGTGAGT	intergenic							11543.4	3132.72	13.3083	11.7147	11448.1	11717.2	11464.8	2725.71	3155.76	3257.21	3392.2	13.2763	13.3148	13.3339	11.7849	11.7862	11.5146	11.773
ASHG19A3A038095	0.000107291	2.58863	up	noncoding	uc004bvv.1	Y16709	UCSC_knowngene	154	chr9	-	131457267	131457421	TACAGAGAAAGGAGGAAAAAAGCTAGAATTCTATGCACTACTACACAGGGGCCTAGCACC	natural antisense	NM_003011	SET	protein SET isoform 2	+	131451508	131458675	986.927	362.905	9.86266	8.49047	995.897	972.745	992.138	347.68	379.561	367.87	356.509	9.85788	9.82482	9.9053	8.39767	8.52939	8.42522	8.60962
ASHG19A3A038095	0.000107291	2.58863	up	noncoding	uc004bvv.1	Y16709	UCSC_knowngene	154	chr9	-	131457267	131457421	TACAGAGAAAGGAGGAAAAAAGCTAGAATTCTATGCACTACTACACAGGGGCCTAGCACC	natural antisense	NM_001122821	SET	protein SET isoform 1	+	131445933	131458675	986.927	362.905	9.86266	8.49047	995.897	972.745	992.138	347.68	379.561	367.87	356.509	9.85788	9.82482	9.9053	8.39767	8.52939	8.42522	8.60962
ASHG19A3A034933	0.0216675	2.44508	up	noncoding	uc003vhh.1	BC022431	UCSC_knowngene	1187	chr7	+	114719011	114766368	GCCTATTGTTGAAGGTCGGCTCTTTAATGTGCAAATTAAGGTGTTTTATTTCCTTCATAT	intergenic							20.9402	12.4133	4.61439	3.3245	22.8389	17.3137	22.6678	15.0066	8.62394	16.3628	9.65977	4.68159	4.42797	4.73359	2.88937	3.84511	3.65245	2.91109
ASHG19A3A024959	0.000632622	2.44858	up	noncoding	ENST00000417242	RP11-620E11.1	Ensembl	519	chr4	-	169519390	169519980	GGATTTACCAACAGTGTGAATCAAGAAAGTTAGCCAAACTTCAGGCTCAGGTCCAGATAG	intronic antisense	NM_001166108	PALLD	palladin isoform 1	+	169418216	169849608	505.466	209.938	8.95051	7.65857	483	548.255	485.142	192.087	228.094	199.085	220.484	8.88204	9.0438	8.9257	7.67069	7.60477	7.51351	7.84532
ASHG19A3A024959	0.000632622	2.44858	up	noncoding	ENST00000417242	RP11-620E11.1	Ensembl	519	chr4	-	169519390	169519980	GGATTTACCAACAGTGTGAATCAAGAAAGTTAGCCAAACTTCAGGCTCAGGTCCAGATAG	intronic antisense	NM_016081	PALLD	palladin isoform 2	+	169418216	169849608	505.466	209.938	8.95051	7.65857	483	548.255	485.142	192.087	228.094	199.085	220.484	8.88204	9.0438	8.9257	7.67069	7.60477	7.51351	7.84532
ASHG19A3A021641	0.000265168	4.21496	up	noncoding	ENST00000461864	RP11-85F14.5	Ensembl	1194	chr3	-	136560567	136580879	TGGTGACTCTTAGGTATTTATGCTAAAAATGTTATTTTGGGGATCCTTGGGAATGGACTC	bidirectional	NM_006153	NCK1	cytoplasmic protein NCK1 isoform 1	+	136581049	136667968	192.437	52.7644	7.65476	5.57924	203.366	197.252	176.694	58.2538	50.8954	43.8411	58.0673	7.72461	7.67415	7.56552	5.66027	5.34763	5.72042	5.58867
ASHG19A3A021641	0.000265168	4.21496	up	noncoding	ENST00000461864	RP11-85F14.5	Ensembl	1194	chr3	-	136560567	136580879	TGGTGACTCTTAGGTATTTATGCTAAAAATGTTATTTTGGGGATCCTTGGGAATGGACTC	intronic antisense	NM_025246	TMEM22	transmembrane protein 22	+	136537860	136574734	192.437	52.7644	7.65476	5.57924	203.366	197.252	176.694	58.2538	50.8954	43.8411	58.0673	7.72461	7.67415	7.56552	5.66027	5.34763	5.72042	5.58867
ASHG19A3A021641	0.000265168	4.21496	up	noncoding	ENST00000461864	RP11-85F14.5	Ensembl	1194	chr3	-	136560567	136580879	TGGTGACTCTTAGGTATTTATGCTAAAAATGTTATTTTGGGGATCCTTGGGAATGGACTC	intronic antisense	NM_001097600	TMEM22	transmembrane protein 22	+	136537860	136574734	192.437	52.7644	7.65476	5.57924	203.366	197.252	176.694	58.2538	50.8954	43.8411	58.0673	7.72461	7.67415	7.56552	5.66027	5.34763	5.72042	5.58867
ASHG19A3A021641	0.000265168	4.21496	up	noncoding	ENST00000461864	RP11-85F14.5	Ensembl	1194	chr3	-	136560567	136580879	TGGTGACTCTTAGGTATTTATGCTAAAAATGTTATTTTGGGGATCCTTGGGAATGGACTC	intronic antisense	NM_001097599	TMEM22	transmembrane protein 22	+	136537860	136574734	192.437	52.7644	7.65476	5.57924	203.366	197.252	176.694	58.2538	50.8954	43.8411	58.0673	7.72461	7.67415	7.56552	5.66027	5.34763	5.72042	5.58867
ASHG19A3A010696	8.20364e-05	5.70377	up	noncoding	ENST00000398175	AC090377.1	Ensembl	1785	chr18	+	57636814	57638606	CATGAGGCCATCTTGCTTTGTCCCAACAGTACATTTAGAAGAGATCCAATAGCAAGGACC	intergenic							2370.64	384.297	11.0844	8.57249	2454.13	2408.63	2249.16	412.45	399.847	334.286	390.606	11.1139	11.0926	11.0467	8.53803	8.38835	8.68169	8.6819
ASHG19A3L0000775	5.10965e-06	2.7571	up	noncoding	AB208948	lincRNA-STON2-2	lincRNA	4302	chr14	-	81726999	81893748	CTGTAGAGGTGAGGTTTTGTTTTTAGTTGTTCTACTGATTATATCCTTTTCTGAGCTATG	exon sense-overlapping	NM_033104	STON2	stonin-2	-	81736908	81864927	4906.19	1508.51	12.1136	10.6505	5027.97	4882.32	4808.28	1523.9	1409.12	1492.08	1608.95	12.1187	12.1005	12.1216	10.6873	10.6439	10.67	10.6006
ASHG19A3A007268	5.36631e-06	2.40064	up	noncoding	NR_024203	ECD	RefSeq_NR	1869	chr10	-	74894282	74927853	CTGCTGTGAATAGGCGCATCAGAGGGTCACATTCACTAAATGTCTATATGCACAATTGGT	exon sense-overlapping	NM_001135753	ECD	protein SGT1 isoform 3	-	74894281	74927853	351.419	155.532	8.47195	7.20853	345.325	354.939	353.993	155.881	154.048	150.293	161.907	8.43839	8.46642	8.51105	7.20213	7.18316	7.19531	7.25352
ASHG19A3A007268	5.36631e-06	2.40064	up	noncoding	NR_024203	ECD	RefSeq_NR	1869	chr10	-	74894282	74927853	CTGCTGTGAATAGGCGCATCAGAGGGTCACATTCACTAAATGTCTATATGCACAATTGGT	bidirectional	NM_173348	FAM149B1	hypothetical protein LOC317662	+	74927876	75001939	351.419	155.532	8.47195	7.20853	345.325	354.939	353.993	155.881	154.048	150.293	161.907	8.43839	8.46642	8.51105	7.20213	7.18316	7.19531	7.25352
ASHG19A3A007268	5.36631e-06	2.40064	up	noncoding	NR_024203	ECD	RefSeq_NR	1869	chr10	-	74894282	74927853	CTGCTGTGAATAGGCGCATCAGAGGGTCACATTCACTAAATGTCTATATGCACAATTGGT	exon sense-overlapping	NM_001135752	ECD	protein SGT1 isoform 2	-	74894281	74927853	351.419	155.532	8.47195	7.20853	345.325	354.939	353.993	155.881	154.048	150.293	161.907	8.43839	8.46642	8.51105	7.20213	7.18316	7.19531	7.25352
ASHG19A3A007268	5.36631e-06	2.40064	up	noncoding	NR_024203	ECD	RefSeq_NR	1869	chr10	-	74894282	74927853	CTGCTGTGAATAGGCGCATCAGAGGGTCACATTCACTAAATGTCTATATGCACAATTGGT	exon sense-overlapping	NM_007265	ECD	protein SGT1 isoform 1	-	74894281	74927853	351.419	155.532	8.47195	7.20853	345.325	354.939	353.993	155.881	154.048	150.293	161.907	8.43839	8.46642	8.51105	7.20213	7.18316	7.19531	7.25352
ASHG19A3A007486	3.11697e-05	6.66224	up	noncoding	NR_027667	NCRNA00188	RefSeq_NR	1259	chr17	+	16342300	16345338	GGGTGTGCAAACCCGAGAGAACTGGATTGCGTACCCACTGCAGAGTGCTGAAGACGGGGT	natural antisense	NM_001113567	C17orf76	leucine-rich repeat-containing protein C17orf76	-	16345327	16395480	989.182	146.988	9.85888	7.12288	938.156	1075.77	953.622	143.064	155.76	139.233	149.896	9.77259	9.95382	9.85024	7.08996	7.06607	7.06546	7.27001
ASHG19A3A007486	3.11697e-05	6.66224	up	noncoding	NR_027667	NCRNA00188	RefSeq_NR	1259	chr17	+	16342300	16345338	GGGTGTGCAAACCCGAGAGAACTGGATTGCGTACCCACTGCAGAGTGCTGAAGACGGGGT	natural antisense	NM_207387	C17orf76	leucine-rich repeat-containing protein C17orf76	-	16345327	16395480	989.182	146.988	9.85888	7.12288	938.156	1075.77	953.622	143.064	155.76	139.233	149.896	9.77259	9.95382	9.85024	7.08996	7.06607	7.06546	7.27001
ASHG19A3A038381	6.81908e-06	3.7836	up	noncoding	ENST00000422292	RP11-54D18.4	Ensembl	979	chr9	+	15055053	15056032	CTCACAGAAGGAATATGCTGAAAGGCCAAAATGAGAAAGAAGCAGCAGATCGAAAACGCA	intergenic							901.251	232.303	9.73767	7.81791	946.815	918.385	838.552	223.931	229.399	229.608	246.276	9.78736	9.74585	9.6798	7.84497	7.82409	7.74577	7.85683
ASHG19A3A038920	0.000406818	94.0196	up	noncoding	CR620154		misc_RNA	1356	chr9	+	93759335	93764114	CTGGGGCCTAATGATGTTTCAAATCAAATCACTCTGTAGGGGATTTTCCATTTAACATAT	intergenic							769.204	9.99442	9.51852	2.96363	769.619	788.776	749.218	13.534	5	5	16.4437	9.50021	9.53794	9.51743	3.71561	2.32995	3.4777	2.33128
ASHG19A3A050722	0.000482322	3.52391	up	noncoding	uc001wun.2	AK125018	UCSC_knowngene	4492	chr14	-	39218544	39417475	TTTCAACACCTTGAAATGAACGATGCCTCATGTCTCTGCAGGGTGGACATAGCTCTAACT	intergenic							235.934	75.1524	7.92655	6.10938	223.618	242.687	241.498	68.0851	77.0244	66.1678	89.3322	7.84813	7.953	7.97854	6.30306	5.96539	5.95613	6.21292
ASHG19A3A013443	0.00392776	6.53509	up	noncoding	ENST00000452887	RP11-62I21.2	Ensembl	232	chr1	-	245446159	245446391	GACAAAATGGGAAGCAGCATTAATACTCCATGTATGCCCGACTGCCAATAAGGGAAAATA	intronic antisense	NM_018012	KIF26B	kinesin-like protein KIF26B	+	245318286	245866428	355.693	62.3984	8.48219	5.77398	350.195	314.256	402.627	34.767	66.048	68.5407	80.2378	8.45799	8.30105	8.68753	6.14789	6.01495	4.94713	5.98597
ASHG19A3A034074	1.16219e-06	3.71722	up	noncoding	ENST00000441690	AC010677.5	Ensembl	412	chr7	+	26315814	26316226	GACGGTGTGTTTCTTTATTTTGAAGGTAATGCAGGGGTCATAATAAAAAACAAAGACGAG	intergenic							20990.9	4546.51	14.1484	12.2542	22249.2	19919.5	20803.9	4486.21	4490.24	4198.47	5011.12	14.1959	14.0769	14.1724	12.3377	12.1543	12.2488	12.2759
ASHG19A3A019663	0.0015626	3.60541	up	noncoding	ENST00000423857	CTA-85E5.7	Ensembl	315	chr22	-	30501082	30501397	AAGGTCTCCAAGGACAAAAGGGCCTTCAAGTTCATCAAGAAAAAGGTGGGAACACACATC	intronic antisense	NM_152510	HORMAD2	HORMA domain-containing protein 2	+	30476452	30573062	5310.64	1267.6	12.2281	10.3779	4925.97	5465.31	5540.64	939.81	1384.99	1347.52	1398.08	12.0943	12.2645	12.3256	10.4829	10.503	9.95565	10.5703
ASHG19A3A007747	5.146e-05	3.38389	up	noncoding	NR_033249	GCSH	RefSeq_NR	1474	chr16	-	81115551	81129980	GGAACAGTGGGAATCAGCAATTTTGCACAGATGAGTTTGGTGCTTTGGAAAGTGTGAAAG	exon sense-overlapping	NM_004483	GCSH	glycine cleavage system H protein, mitochondrial	-	81115551	81129980	3858.92	982.753	11.7717	10.0131	4022.74	3801.76	3752.25	1044.72	879.431	990.68	1016.18	11.8112	11.7307	11.7733	10.0129	10.0405	10.1082	9.89068
ASHG19A3A026621	1.88803e-05	2.10381	up	noncoding	ENST00000509113	CTD-2533K21.1	Ensembl	148	chr5	-	26670442	26670590	CTTGTAAACAAATCTTGTTATGAAGATGGTTGGCTGATCAAGATGACACTGAGTAATCCA	intergenic							12548.8	4855.19	13.4269	12.3538	12674.6	12950.5	12021.4	4896.81	4757.79	4815.67	4950.49	13.4149	13.4651	13.4006	12.3201	12.3538	12.3811	12.3604
ASHG19A3A034330	0.000142756	8.36272	up	noncoding	ENST00000421150	RP11-266F12.1	Ensembl	1551	chr7	+	53255080	53256631	GATAGAAACAGTGTTTCACTACTTGAAAAGGACACAAAGATGGGAACTCCCAAAGAAAAA	intergenic							139.229	20.5379	7.21441	4.15044	145.993	132.351	139.343	18.6655	17.4123	23.3912	22.6827	7.26624	7.13421	7.24277	4.22463	4.40151	3.99694	3.97866
ASHG19A3A047405	0.000215615	2.23787	up	noncoding	NR_024064	DAD1L	RefSeq_NR	631	chr12	-	25070635	25071266	CTGACTTCTGCCTTCAATTAACTGTAACCTTTTGCCTTCCAAATTAAAAAGTTCCACATT	intron sense-overlapping	NM_001178091	BCAT1	branched-chain-amino-acid aminotransferase,	-	24962957	25102393	3776.25	1435.45	11.7408	10.5787	3798.27	3641.33	3889.16	1357.99	1486.12	1456.43	1441.28	11.7248	11.6715	11.8261	10.5327	10.613	10.5026	10.6665
ASHG19A3A047405	0.000215615	2.23787	up	noncoding	NR_024064	DAD1L	RefSeq_NR	631	chr12	-	25070635	25071266	CTGACTTCTGCCTTCAATTAACTGTAACCTTTTGCCTTCCAAATTAAAAAGTTCCACATT	intron sense-overlapping	NM_005504	BCAT1	branched-chain-amino-acid aminotransferase,	-	24962957	25102393	3776.25	1435.45	11.7408	10.5787	3798.27	3641.33	3889.16	1357.99	1486.12	1456.43	1441.28	11.7248	11.6715	11.8261	10.5327	10.613	10.5026	10.6665
ASHG19A3A047405	0.000215615	2.23787	up	noncoding	NR_024064	DAD1L	RefSeq_NR	631	chr12	-	25070635	25071266	CTGACTTCTGCCTTCAATTAACTGTAACCTTTTGCCTTCCAAATTAAAAAGTTCCACATT	intron sense-overlapping	NM_001178092	BCAT1	branched-chain-amino-acid aminotransferase,	-	24962957	25102393	3776.25	1435.45	11.7408	10.5787	3798.27	3641.33	3889.16	1357.99	1486.12	1456.43	1441.28	11.7248	11.6715	11.8261	10.5327	10.613	10.5026	10.6665
ASHG19A3A025780	1.51109e-05	2.76857	up	noncoding	ENST00000505987	HSP90AA4P	Ensembl	2173	chr4	+	88812994	88815167	CTTCTCTGAGCTGGCAGAAGACAAGGAGATTATAAGAAATTCTATGAGGCATTTTCTAAA	intergenic							16781.7	4901.98	13.8355	12.3663	16965.2	16889.9	16490	4654.41	4686.09	4988.04	5279.37	13.826	13.8382	13.8423	12.416	12.3998	12.3132	12.3364
ASHG19A3A041114	0.0144324	2.35115	up	noncoding	AF147360		misc_RNA	583	chrX	+	67311254	67311836	TAGGGAATCAGTGTAGAGGTAGATCTTCCCCTATTATTTACCTACTTTCCAACTTAAAAA	intronic antisense	NM_002547	OPHN1	oligophrenin-1	-	67262185	67653299	250.345	114.376	7.97408	6.74072	185.063	233.479	332.491	100.398	109.872	120.563	126.671	7.59458	7.90244	8.42522	6.82818	6.85346	6.53802	6.7432
ASHG19A3A048894	0.00106229	3.35846	up	noncoding	AL133569		misc_RNA	3187	chr12	+	82906455	82909596	TGTGGGAATATGTGCATGTTTAGTGACATTCTTTGTGGTGGCAAAAAGTAAAATAAACTC	intergenic							83.5461	31.2889	6.51625	4.76845	78.8503	80.9692	90.8188	38.6288	35.4466	21.7316	29.3485	6.43569	6.45956	6.6535	4.62739	4.29007	5.10485	5.05148
ASHG19A3A021383	1.11768e-06	6.04151	up	noncoding	ENST00000489433	RP11-381E24.1	Ensembl	509	chr3	-	108262213	108262722	ATGTGCATATCAGTGTCTTCAAGGAGAAAGCCAGAGTCATCACCAAGGAGAAGTTCTTTA	intergenic							2237.97	343.592	11.0039	8.409	2300.74	2245.86	2167.3	331.558	340.668	338.601	363.543	11.0263	10.9934	10.9921	8.42836	8.40431	8.35129	8.45205
ASHG19A3A042869	0.000402852	3.6391	up	noncoding	ENST00000436904	MYL6P3	Ensembl	432	chr10	-	66929195	66929627	GCACGAGGATAACATTGGTTGTATTAACTAGGAAGAGCTCATCTGCATGGTGCCAAATGG	intergenic							179.235	56.8223	7.5448	5.68122	181.268	149.149	207.288	73.7723	53.4075	49.3199	50.7893	7.5629	7.29499	7.77653	5.45649	5.52375	6.08015	5.6645
ASHG19A3A016165	0.0036355	2.18691	up	noncoding	uc002tfi.3	AK056084	UCSC_knowngene	1725	chr2	+	110744639	110752147	TCTCAAGCAGAGAGCGTGAGAAGTTCTGCAGATGTATGTGGCGCACAGCCTCTACAGCCG	intergenic							95.7932	52.9065	6.70657	5.57768	93.1337	95.876	98.37	42.6991	50.5036	55.7195	62.7039	6.65959	6.69759	6.76255	5.77476	5.70488	5.25151	5.57957
ASHG19A3A049080	0.000393027	2.75417	up	noncoding	ENST00000477702	NCRNA00173	Ensembl	314	chr12	+	116973868	116974323	TGGAGACTCCTATTCACCCTTCAGATCAATATCCCCCAAATAAACTCCCAGTCACTCTGG	intergenic							3745.84	1163.57	11.7245	10.2629	3962.3	3932.5	3342.72	1242.93	1052.64	1240.12	1118.61	11.7811	11.7822	11.6103	10.1484	10.3771	10.3709	10.1553
ASHG19A3A009346	0.0325396	3.42593	up	noncoding	ENST00000413577	RP11-553K8.5	Ensembl	416	chr1	-	198626681	198636190	AAAGTTTTCTCATAATGTTTTGCAACTTCTGCTTCCGGGCCCAGTCAGAGCCCAAAAGCA	intronic antisense	NM_080921	PTPRC	receptor-type tyrosine-protein phosphatase C	+	198608136	198726545	78.153	31.1512	6.37536	4.59886	73.988	105.378	55.0926	50.5232	12.204	36.4496	25.4278	6.34271	6.82149	5.96187	4.40495	5.07163	5.51353	3.40535
ASHG19A3A009346	0.0325396	3.42593	up	noncoding	ENST00000413577	RP11-553K8.5	Ensembl	416	chr1	-	198626681	198636190	AAAGTTTTCTCATAATGTTTTGCAACTTCTGCTTCCGGGCCCAGTCAGAGCCCAAAAGCA	intronic antisense	NM_080923	PTPRC	receptor-type tyrosine-protein phosphatase C	+	198608136	198662334	78.153	31.1512	6.37536	4.59886	73.988	105.378	55.0926	50.5232	12.204	36.4496	25.4278	6.34271	6.82149	5.96187	4.40495	5.07163	5.51353	3.40535
ASHG19A3A009346	0.0325396	3.42593	up	noncoding	ENST00000413577	RP11-553K8.5	Ensembl	416	chr1	-	198626681	198636190	AAAGTTTTCTCATAATGTTTTGCAACTTCTGCTTCCGGGCCCAGTCAGAGCCCAAAAGCA	intronic antisense	NM_002838	PTPRC	receptor-type tyrosine-protein phosphatase C	+	198608136	198726545	78.153	31.1512	6.37536	4.59886	73.988	105.378	55.0926	50.5232	12.204	36.4496	25.4278	6.34271	6.82149	5.96187	4.40495	5.07163	5.51353	3.40535
ASHG19A3A042213	0.000486885	3.52344	up	noncoding	ENST00000417124	AC013734.1	Ensembl	323	chrY	+	28546757	28547377	CTAAGAAGAAGGCAGAAAGGGCAGACTTGATAGCTTATCTCAGAAAAGCTAATAATGAGT	intergenic							271.218	84.8964	8.11224	6.29525	292.635	249.318	271.701	74.7397	86.5236	91.8354	86.4869	8.20684	7.98722	8.14266	6.25585	6.4425	6.0979	6.38476
ASHG19A3L0001687	0.000213478	2.90667	up	noncoding	CD516039	lincRNA-THBS4	lincRNA	510	chr5	+	79306992	79307717	GATCAAAAACCACTTCATTGAGGAAAGCAACCCACCAAACACAGAAGCAGAAAGAGAGCT	intergenic							660.451	226.459	9.31558	7.77621	664.4	663.164	653.791	200.909	227.147	234.669	243.111	9.30933	9.30374	9.33367	7.82589	7.86029	7.57909	7.83957
ASHG19A3A027514	0.000253899	3.08858	up	noncoding	CR611965		misc_RNA	643	chr5	-	141323144	141323786	TGATCTCCTTACAGAATCTGTGATTTTCAGGCTGGATCACAGAACTGTTGGGTTCTGTGG	intergenic							87.5595	34.7476	6.57808	4.95114	90.2003	94.1032	78.3751	34.3444	30.2565	40.9898	33.4	6.61151	6.67274	6.45	4.82171	5.24449	4.9262	4.81216
ASHG19A3A025807	0.000641132	3.04403	up	noncoding	ENST00000478069	RP11-398J16.1	Ensembl	331	chr4	+	95290983	95291314	TCATGCCAAATTCCAAAGCAACCTTACCGCTAAAGCTATTGGACACAGAGTCCGAGTGAT	intergenic							430.994	149.532	8.74485	7.13887	435.096	393.82	464.066	182.546	137.597	145.811	132.173	8.75456	8.61168	8.86833	6.89459	7.13763	7.4412	7.08207
ASHG19A3A007142	0.00241788	2.12753	up	noncoding	NR_003501	EARS2	RefSeq_NR	3886	chr16	-	23533334	23568696	GAGAAGTGTGACTCCACTGCCAAGGTCTTCCAGACCTGGTCCTTGGACTGGAGACCTTCA	bidirectional	NM_019116	UBFD1	ubiquitin domain-containing protein UBFD1	+	23568861	23585710	502.959	239.19	8.94684	7.85766	499.105	498.611	511.16	197.822	249.358	258.712	250.87	8.92349	8.92172	8.9953	7.87519	8.00616	7.55901	7.99027
ASHG19A3A007142	0.00241788	2.12753	up	noncoding	NR_003501	EARS2	RefSeq_NR	3886	chr16	-	23533334	23568696	GAGAAGTGTGACTCCACTGCCAAGGTCTTCCAGACCTGGTCCTTGGACTGGAGACCTTCA	exon sense-overlapping	NM_001083614	EARS2	probable glutamyl-tRNA synthetase, mitochondrial	-	23533333	23568696	502.959	239.19	8.94684	7.85766	499.105	498.611	511.16	197.822	249.358	258.712	250.87	8.92349	8.92172	8.9953	7.87519	8.00616	7.55901	7.99027
ASHG19A3A027665	0.00244645	33.6116	up	noncoding	ENST00000441757	AC116917.2	Ensembl	306	chr5	-	163136210	163136518	CTCAGAGGAGGAGTATTCCACCAAAGAAGAGAAATATGAAAAGGAGATGAAACTGCTGGA	intergenic							4432.65	146.358	11.9774	6.90654	4571.75	4442.99	4283.2	44.308	174.685	189.425	177.013	11.9953	11.966	11.971	7.33642	7.53427	5.31293	7.44255
ASHG19A3A022456	0.0144501	2.14432	up	noncoding	ENST00000422197	RP11-275F13.3	Ensembl	862	chr1	+	51837950	51838812	CAACTTCATCAACAACAAGATTGCCAATCAGGATGTAGAGAAGAAAGAAGGGCAGGAAAC	intronic antisense	NM_001981	EPS15	epidermal growth factor receptor substrate 15	-	51819934	51984995	3682.05	1517.63	11.7055	10.6049	3658.86	3669.88	3717.39	1541.74	1765.36	931.526	1831.9	11.6693	11.6869	11.7602	10.8736	9.94397	10.6911	10.9111
ASHG19A3A022456	0.0144501	2.14432	up	noncoding	ENST00000422197	RP11-275F13.3	Ensembl	862	chr1	+	51837950	51838812	CAACTTCATCAACAACAAGATTGCCAATCAGGATGTAGAGAAGAAAGAAGGGCAGGAAAC	intronic antisense	NM_001159969	EPS15	epidermal growth factor receptor substrate 15	-	51819934	51887793	3682.05	1517.63	11.7055	10.6049	3658.86	3669.88	3717.39	1541.74	1765.36	931.526	1831.9	11.6693	11.6869	11.7602	10.8736	9.94397	10.6911	10.9111
ASHG19A3A052210	0.000242139	2.29633	up	noncoding	AK125533		misc_RNA	2656	chr15	-	59951344	59953992	CAGAGAAGGTTAGCAGTTACAGCACTTAAAAGTTTAGGATTGAGGGTTTTTGGTTGGTTT	intergenic							477.139	212.551	8.87971	7.68038	474.709	467.951	488.757	197.857	210.311	210.779	231.258	8.86134	8.84008	8.9377	7.74392	7.69402	7.55992	7.72366
ASHG19A3A045544	0.0132994	2.28432	up	noncoding	CR595419		misc_RNA	2041	chr11	-	82962568	82964609	CCCCAAGGTCATGAAGATATCCTACGTTATATTTTATCATCTCAACTTCCAATTTAAGAC	intergenic							88.2839	48.2221	6.59015	5.39839	88.6326	84.8898	91.3294	34.8637	41.6841	44.6742	71.6665	6.58756	6.52331	6.65959	5.97194	5.37794	4.95045	5.29322
ASHG19A3A037987	3.97904e-05	7.55373	up	noncoding	ENST00000507541	AL513122.1	Ensembl	2094	chr9	-	124053714	124057566	CTCACGGACTCACCAGAACTTGATACAAGTACAAATCAGTTAGAGAAAAAGTCCAATGGG	intronic antisense	NM_001127664	GSN	gelsolin isoform b	+	124030379	124095120	217.438	33.4479	7.81776	4.90057	228.664	215.979	207.669	34.2617	35.7817	29.3259	34.422	7.87747	7.79628	7.77954	4.87187	4.7439	4.9229	5.06363
ASHG19A3A037987	3.97904e-05	7.55373	up	noncoding	ENST00000507541	AL513122.1	Ensembl	2094	chr9	-	124053714	124057566	CTCACGGACTCACCAGAACTTGATACAAGTACAAATCAGTTAGAGAAAAAGTCCAATGGG	intronic antisense	NM_001127667	GSN	gelsolin isoform c	+	124030379	124095120	217.438	33.4479	7.81776	4.90057	228.664	215.979	207.669	34.2617	35.7817	29.3259	34.422	7.87747	7.79628	7.77954	4.87187	4.7439	4.9229	5.06363
ASHG19A3A037987	3.97904e-05	7.55373	up	noncoding	ENST00000507541	AL513122.1	Ensembl	2094	chr9	-	124053714	124057566	CTCACGGACTCACCAGAACTTGATACAAGTACAAATCAGTTAGAGAAAAAGTCCAATGGG	intronic antisense	NM_001127662	GSN	gelsolin isoform b	+	124030379	124095120	217.438	33.4479	7.81776	4.90057	228.664	215.979	207.669	34.2617	35.7817	29.3259	34.422	7.87747	7.79628	7.77954	4.87187	4.7439	4.9229	5.06363
ASHG19A3A037987	3.97904e-05	7.55373	up	noncoding	ENST00000507541	AL513122.1	Ensembl	2094	chr9	-	124053714	124057566	CTCACGGACTCACCAGAACTTGATACAAGTACAAATCAGTTAGAGAAAAAGTCCAATGGG	intronic antisense	NM_198252	GSN	gelsolin isoform b	+	124030379	124095120	217.438	33.4479	7.81776	4.90057	228.664	215.979	207.669	34.2617	35.7817	29.3259	34.422	7.87747	7.79628	7.77954	4.87187	4.7439	4.9229	5.06363
ASHG19A3A037987	3.97904e-05	7.55373	up	noncoding	ENST00000507541	AL513122.1	Ensembl	2094	chr9	-	124053714	124057566	CTCACGGACTCACCAGAACTTGATACAAGTACAAATCAGTTAGAGAAAAAGTCCAATGGG	intronic antisense	NM_001127663	GSN	gelsolin isoform b	+	124030379	124095120	217.438	33.4479	7.81776	4.90057	228.664	215.979	207.669	34.2617	35.7817	29.3259	34.422	7.87747	7.79628	7.77954	4.87187	4.7439	4.9229	5.06363
ASHG19A3A037987	3.97904e-05	7.55373	up	noncoding	ENST00000507541	AL513122.1	Ensembl	2094	chr9	-	124053714	124057566	CTCACGGACTCACCAGAACTTGATACAAGTACAAATCAGTTAGAGAAAAAGTCCAATGGG	intronic antisense	NM_001127665	GSN	gelsolin isoform b	+	124030379	124095120	217.438	33.4479	7.81776	4.90057	228.664	215.979	207.669	34.2617	35.7817	29.3259	34.422	7.87747	7.79628	7.77954	4.87187	4.7439	4.9229	5.06363
ASHG19A3A037987	3.97904e-05	7.55373	up	noncoding	ENST00000507541	AL513122.1	Ensembl	2094	chr9	-	124053714	124057566	CTCACGGACTCACCAGAACTTGATACAAGTACAAATCAGTTAGAGAAAAAGTCCAATGGG	intronic antisense	NM_001127666	GSN	gelsolin isoform c	+	124030379	124095120	217.438	33.4479	7.81776	4.90057	228.664	215.979	207.669	34.2617	35.7817	29.3259	34.422	7.87747	7.79628	7.77954	4.87187	4.7439	4.9229	5.06363
ASHG19A3A039141	2.73964e-07	5.72715	up	noncoding	CR605514		misc_RNA	1471	chr9	+	117073276	117074747	GTTTACGTCTCTGTCCACATGTCAGTGTATTAAAACCCCAATGGGTTCCGTTTCTCCTTT	intergenic							41127.6	5683.61	15.1122	12.5944	40957.6	42025	40400.1	5613.9	5450.32	5857.72	5812.5	15.0785	15.1362	15.1218	12.5652	12.6485	12.585	12.5787
ASHG19A3A034752	1.38831e-05	4.25335	up	noncoding	ENST00000448483	RP1-190I16.2	Ensembl	129	chr1	+	169959207	169959336	ATTTACAAGAAGCACAGAGTTCAGTATGAAATGAGAACACTTTACAGATGTTTAGAGGTG	intronic antisense	NM_001204516	KIFAP3	kinesin-associated protein 3 isoform 3	-	169890469	170043879	3417.13	706.129	11.6019	9.51325	3412.34	3448.15	3390.9	674.553	680.975	731.527	737.463	11.5774	11.5965	11.6316	9.51421	9.58565	9.43985	9.5133
ASHG19A3A034752	1.38831e-05	4.25335	up	noncoding	ENST00000448483	RP1-190I16.2	Ensembl	129	chr1	+	169959207	169959336	ATTTACAAGAAGCACAGAGTTCAGTATGAAATGAGAACACTTTACAGATGTTTAGAGGTG	intronic antisense	NM_014970	KIFAP3	kinesin-associated protein 3 isoform 1	-	169890469	170043879	3417.13	706.129	11.6019	9.51325	3412.34	3448.15	3390.9	674.553	680.975	731.527	737.463	11.5774	11.5965	11.6316	9.51421	9.58565	9.43985	9.5133
ASHG19A3A034752	1.38831e-05	4.25335	up	noncoding	ENST00000448483	RP1-190I16.2	Ensembl	129	chr1	+	169959207	169959336	ATTTACAAGAAGCACAGAGTTCAGTATGAAATGAGAACACTTTACAGATGTTTAGAGGTG	intronic antisense	NM_001204517	KIFAP3	kinesin-associated protein 3 isoform 4	-	169890469	170038056	3417.13	706.129	11.6019	9.51325	3412.34	3448.15	3390.9	674.553	680.975	731.527	737.463	11.5774	11.5965	11.6316	9.51421	9.58565	9.43985	9.5133
ASHG19A3A034752	1.38831e-05	4.25335	up	noncoding	ENST00000448483	RP1-190I16.2	Ensembl	129	chr1	+	169959207	169959336	ATTTACAAGAAGCACAGAGTTCAGTATGAAATGAGAACACTTTACAGATGTTTAGAGGTG	intronic antisense	NM_001204514	KIFAP3	kinesin-associated protein 3 isoform 2	-	169890469	170043879	3417.13	706.129	11.6019	9.51325	3412.34	3448.15	3390.9	674.553	680.975	731.527	737.463	11.5774	11.5965	11.6316	9.51421	9.58565	9.43985	9.5133
ASHG19A3A033095	4.13953e-05	10.5103	up	noncoding	ENST00000394740	AC004894.2	Ensembl	1041	chr7	-	82219097	82291258	ATGATCAAGGAAGGAGCAGCCATCATTAATGTGGGAATAAATAGAGTTCAAGATCCCGTA	intergenic							201.183	23.0972	7.69712	4.30339	224.088	220.523	158.94	17.1737	18.7559	28.5667	27.8926	7.85023	7.82513	7.41602	4.54421	4.70409	3.86361	4.10163
ASHG19A3A035237	0.000603685	3.59564	up	noncoding	ENST00000440891	AC106862.1	Ensembl	1609	chr7	+	143295783	143305010	AGAAGAGAGTCAGAATCTACCTGAGCAAGGGTCCCAATGTGAAAAACTGGAATGCATGGA	intergenic							45.5426	16.9643	5.67982	3.83357	47.1606	43.7808	45.6863	19.4393	15.9816	12.7932	19.6431	5.70144	5.63009	5.70793	3.99503	3.441	4.05717	3.8411
ASHG19A3A010430	1.56325e-05	3.47918	up	noncoding	ENST00000426884	RP11-421E17.4	Ensembl	112	chr1	-	206506677	206506789	AGACTGAGGATAGTTTAGAAGGATGCTTGGATTGTCTGCTTCAAGCCCTGGCTCAAAATA	intergenic							634.366	183.648	9.26045	7.4617	639.418	656.983	606.697	190.539	176.318	186.72	181.013	9.26155	9.28948	9.23031	7.3728	7.51317	7.50353	7.45731
ASHG19A3A029288	0.00248495	2.48681	up	noncoding	ENST00000468453	CTB-14A14.1	Ensembl	592	chr5	+	180492085	180492677	GGCTCTTCGGCATATGGAGAGCTGATGCAAGCTGCAGAACAGGATGTTGAAAAGAGAAAA	intergenic							6210.1	2139.77	12.4454	11.1311	6033.98	5935.91	6660.4	2518.31	2273.08	1459.73	2307.96	12.3831	12.3815	12.5717	11.2166	10.6181	11.403	11.2868
ASHG19A3A021533	0.00146485	2.41932	up	noncoding	ENST00000513160	RP11-605F14.3	Ensembl	1042	chr3	-	126485276	126486318	AGTGAGACCGAGAAAGAGAAGATCAAGAAACTACCAGAATACAACCGCCAAACCCTTTGA	intronic antisense	NM_032343	CHCHD6	coiled-coil-helix-coiled-coil-helix	+	126423117	126679244	43.8974	23.2937	5.62143	4.34683	50.4438	36.3015	44.9468	20.6625	26.0005	21.797	24.7149	5.79583	5.38271	5.68574	4.36367	4.29383	4.1499	4.57991
ASHG19A3A021278	0.000451779	2.09835	up	noncoding	ENST00000493675	RP11-413E6.4	Ensembl	1213	chr3	-	75702711	75703924	ACACATGCAGGATTGGAGACAGACAAACCGTCTTCAATTAAAGAGACTCACCTTCTCCAA	intergenic							147.017	80.5154	7.28989	6.22064	151.747	146.624	142.679	75.168	85.0932	81.4877	80.3127	7.32049	7.27266	7.27652	6.14924	6.26484	6.10737	6.36111
ASHG19A3A024101	0.000715046	2.25209	up	noncoding	ENST00000507914	RP11-333E13.4	Ensembl	871	chr4	-	40044830	40045701	ATTTTGACAACAAGATCAGAAAAGGCTGCATCAAGACCATCTCCGGACGCATGACCTTCA	intergenic							274.982	132.18	8.134	6.96273	264.635	271.026	289.286	120.699	132.559	138.942	136.519	8.06882	8.09919	8.23398	6.94819	7.06258	6.81264	7.02752
ASHG19A3A033196	0.014536	2.97148	up	noncoding	ENST00000429766	AC073900.4	Ensembl	776	chr7	-	96830019	96830795	ATCAGGATCAATTATAACGACAGATATGATGAGATTCCCCATCACTGGGGAGGCAACGTC	intergenic							1450.57	464.255	10.3829	8.8117	1497.57	1291.3	1562.85	267.99	481.626	547.478	559.927	10.4104	10.2103	10.5279	9.10202	9.14248	8.02299	8.97931
ASHG19A3A053119	0.00296693	3.08922	up	noncoding	ENST00000456382	RP11-29H23.4	Ensembl	448	chr1	-	155579338	155580171	GGACTGGCTTAGCTATCATATCTCTATCATTTACACGTATTTATCTATCTCTGTGTATCT	natural antisense	NM_018116	MSTO1	protein misato homolog 1	+	155580006	155584758	142.169	54.0356	7.2388	5.61155	158.732	136.048	131.728	59.5445	50.2575	61.9102	44.4303	7.3801	7.17068	7.1656	5.25945	5.85966	5.75437	5.57274
ASHG19A3A007128	0.00482731	2.50527	up	noncoding	NR_003135	CEP170L	RefSeq_NR	1091	chr4	+	119437494	119475357	TTCATCAGGCACTGCCCCTAGTACCACATTGGTTGATCGTGTTTTTGATGAAAGCCTCAA	intergenic							132.072	63.1738	7.14215	5.81718	136.372	138.595	121.25	43.0491	56.9123	77.8855	74.8482	7.17801	7.19739	7.05105	6.04093	6.20179	5.26307	5.76295
ASHG19A3A023971	0.000166032	6.38594	up	noncoding	uc003gnd.3	BC070495	UCSC_knowngene	1273	chr4	-	14472091	14473364	GGCCAGTTTTCAACATTCGGTCTGAAATTGAGGAGTTGCTGTATGAAAAGTGAATTTATT	intergenic							288.182	50.4401	8.19429	5.51939	291.879	306.063	266.603	54.2494	54.1747	46.7801	46.5561	8.20304	8.26421	8.11562	5.3276	5.44539	5.61625	5.68831
ASHG19A3A011029	0.0233084	4.05573	up	noncoding	BX648637		misc_RNA	3240	chr19	-	10396480	10399695	TATAGTGCTTTTGTGCCGATAGAAAAATCACTCCTTCTGGGGAAAGGCAGGTTGGCCAAT	natural antisense	NM_022377	ICAM4	intercellular adhesion molecule 4 isoform 2	+	10397649	10399198	65.9652	24.0235	6.18423	4.16427	63.3138	71.7257	62.856	48.4779	18.3577	12.3744	16.884	6.1121	6.29572	6.14488	3.75868	3.39203	5.44436	4.06203
ASHG19A3A011029	0.0233084	4.05573	up	noncoding	BX648637		misc_RNA	3240	chr19	-	10396480	10399695	TATAGTGCTTTTGTGCCGATAGAAAAATCACTCCTTCTGGGGAAAGGCAGGTTGGCCAAT	bidirectional	NM_003259	ICAM5	intercellular adhesion molecule 5 precursor	+	10400654	10407454	65.9652	24.0235	6.18423	4.16427	63.3138	71.7257	62.856	48.4779	18.3577	12.3744	16.884	6.1121	6.29572	6.14488	3.75868	3.39203	5.44436	4.06203
ASHG19A3A011029	0.0233084	4.05573	up	noncoding	BX648637		misc_RNA	3240	chr19	-	10396480	10399695	TATAGTGCTTTTGTGCCGATAGAAAAATCACTCCTTCTGGGGAAAGGCAGGTTGGCCAAT	natural antisense	NM_000201	ICAM1	intercellular adhesion molecule 1 precursor	+	10381516	10397291	65.9652	24.0235	6.18423	4.16427	63.3138	71.7257	62.856	48.4779	18.3577	12.3744	16.884	6.1121	6.29572	6.14488	3.75868	3.39203	5.44436	4.06203
ASHG19A3A011029	0.0233084	4.05573	up	noncoding	BX648637		misc_RNA	3240	chr19	-	10396480	10399695	TATAGTGCTTTTGTGCCGATAGAAAAATCACTCCTTCTGGGGAAAGGCAGGTTGGCCAAT	natural antisense	NM_001039132	ICAM4	intercellular adhesion molecule 4 isoform 3	+	10397649	10399198	65.9652	24.0235	6.18423	4.16427	63.3138	71.7257	62.856	48.4779	18.3577	12.3744	16.884	6.1121	6.29572	6.14488	3.75868	3.39203	5.44436	4.06203
ASHG19A3A011029	0.0233084	4.05573	up	noncoding	BX648637		misc_RNA	3240	chr19	-	10396480	10399695	TATAGTGCTTTTGTGCCGATAGAAAAATCACTCCTTCTGGGGAAAGGCAGGTTGGCCAAT	natural antisense	NM_001544	ICAM4	intercellular adhesion molecule 4 isoform 1	+	10397649	10399198	65.9652	24.0235	6.18423	4.16427	63.3138	71.7257	62.856	48.4779	18.3577	12.3744	16.884	6.1121	6.29572	6.14488	3.75868	3.39203	5.44436	4.06203
ASHG19A3A007566	0.00806526	5.52713	up	noncoding	NR_027696	FLJ39653	RefSeq_NR	2547	chr4	+	16228285	16259810	CCTTAGGGAGCTCCCGGTCCTGCAGGTTTTCACTATTTATTTATGACAAATATTCCACAT	bidirectional	NM_153365	TAPT1	transmembrane anterior posterior transformation	-	16162127	16228161	37.7199	9.67321	5.38741	2.92088	28.1296	46.3719	38.6583	18.9258	8.35392	5	6.41315	4.97665	5.70897	5.4766	2.46734	2.32995	4.01883	2.86739
ASHG19A3A044790	0.000390489	2.13441	up	noncoding	ENST00000321602	AC123788.4	Ensembl	1978	chr11	-	3429459	3443749	TTAGAAGCAAAGTTAAGAGACTCATCAGATTCTGAGCTTCTGCGGGATATTTTGCAGAAT	intergenic							410.534	199.654	8.68118	7.58734	417.8	389.338	424.464	201.259	197.879	206.029	193.45	8.69716	8.59411	8.75228	7.47509	7.65974	7.58211	7.63242
ASHG19A3A017341	6.98651e-05	3.73218	up	noncoding	ENST00000450951	PHKBP1	Ensembl	1951	chr20	-	8078470	8080421	TGTACTGGAAAGAAACCCTGAGCTAGAATTTCAAGAAAAAGTGAATCTAGACAAAATGAC	intergenic							1664.36	411.42	10.5752	8.67518	1724.73	1612.61	1655.74	444.429	415.339	344.029	441.882	10.6006	10.5143	10.6107	8.72978	8.42809	8.79709	8.74574
ASHG19A3A024477	0.000776303	2.15094	up	noncoding	ENST00000340589	RP11-466G12.3	Ensembl	663	chr4	-	89429747	89431354	TCACCCAAAAGCAGACGTTGGAGAATAGACTTCTTCCAGAGCCTGCAGTTTCTTCAGTAA	intergenic							101.656	56.2508	6.78952	5.68456	98.7837	98.3827	107.802	51.7599	55.4773	56.6801	61.0861	6.74454	6.73219	6.89185	5.73267	5.73186	5.54917	5.72453
ASHG19A3A033970	1.77121e-05	4.52735	up	noncoding	NR_033435	PHF14	RefSeq_NR	7582	chr7	+	11013498	11147376	GCTTCTTTTTACTTGTTTGCATATTCTCAATAGTCAGGTAAACACCTGACTAATTGCTTG	exon sense-overlapping	NM_014660	PHF14	PHD finger protein 14	+	11013498	11147376	312.249	75.6623	8.30843	6.12976	314.212	312.199	310.336	81.6893	68.9236	75.7178	76.3186	8.30637	8.28857	8.33034	6.07081	6.15886	6.23788	6.05149
ASHG19A3A049485	0.000185488	3.55078	up	noncoding	ENST00000400429	RP11-74J13.2	Ensembl	447	chr13	-	41744837	41745284	ACCACATATTGATGGTGATGGTCAAATGATCTATGAAGAGTTTGTACAAATGATGACAGC	intergenic							9904.99	2306.23	13.0981	11.27	10454.2	9031.92	10228.8	2180.94	2306.29	2420.71	2316.97	13.15	12.9643	13.1799	11.2236	11.349	11.1963	11.3109
ASHG19A3A020691	7.94337e-05	17.4964	up	noncoding	ENST00000417973	AC022007.4	Ensembl	294	chr3	-	10042330	10042624	CGGCATTAAGAAGAAGGCAGAAAGGGCAGGCTTGATAGCTTATCTTAAAAAAGCTACTAA	intergenic							1588.11	90.4036	10.5116	6.38259	1548.02	1571.23	1645.06	82.8606	74.7911	100.388	103.575	10.4516	10.4811	10.602	6.52374	6.57693	6.25911	6.17059
ASHG19A3A047701	0.000479159	2.17986	up	noncoding	BC001489		misc_RNA	1339	chr12	-	56805728	56807039	TTTTTGGCAAGCTGTATATGTGGTGTTCAGAATCCAAAATAAACATCACCTGATATCCAC	intergenic							172.831	89.5963	7.50468	6.38044	181.082	180.721	156.69	92.7506	85.4	92.0231	88.2114	7.56122	7.55436	7.39845	6.28341	6.44557	6.42687	6.3659
ASHG19A3A038889	0.000219699	4.728	up	noncoding	NR_033405	LOC1518	RefSeq_NR	569	chr9	+	90459659	90462338	CATCCAGAGGAGGAACTGATCTTCAATCTACCAGCCCCTGCTGTGTGAAATGCACACTTC	intergenic							4335.01	805.748	11.9454	9.7042	4478.58	4248.96	4277.49	893.443	741.429	877.236	710.885	11.9635	11.904	11.9688	9.4648	9.84654	9.87455	9.6309
ASHG19A3A039691	0.000219603	19.8412	up	noncoding	ENST00000431868	GS1-541M1.2	Ensembl	217	chrX	-	26675407	26675624	GAGATGAAAATGTTTGCAATTTCCTAGAAGGAGGATTATTAATAGGAGGATGTGACAACA	intergenic							366.91	21.6926	8.53168	4.22125	355.307	359.173	386.249	15.6336	22.1267	24.6089	24.4014	8.47668	8.48439	8.63396	4.34278	4.48109	3.72018	4.34096
ASHG19A3A007699	0.00019236	2.551	up	noncoding	NR_029472	SNRPC	RefSeq_NR	1188	chr6	+	34724870	34741633	ACGGCCTGCAGAGCAACATGCCCAACCATCTGTGAGAAAGACACACTGCAGTGGAAGGAA	exon sense-overlapping	NM_003093	SNRPC	U1 small nuclear ribonucleoprotein C	+	34724870	34741634	1219.48	441.363	10.1427	8.79168	1219.44	1173.44	1265.58	422.767	432.632	453.529	456.524	10.1188	10.0799	10.2295	8.7798	8.85721	8.71942	8.81029
ASHG19A3A014969	0.00593692	2.01739	up	noncoding	ENST00000413311	AC093382.1	Ensembl	379	chr2	-	216804030	216806442	TTCATTGTAACACGCCACCTGGTCACAAGATTATGGGGAAATAAATATATCGTCTTCACT	intergenic							249.1	135.967	7.99727	6.98478	251.21	255.446	240.644	120.291	150.128	108.238	165.211	8.00119	8.01778	7.97285	7.23115	6.68827	6.80667	7.21305
ASHG19A3A009775	5.17136e-05	3.50688	up	noncoding	ENST00000429682	RP11-396D18.1	Ensembl	325	chr1	-	202338653	202339273	TAAGAAGAAGGCAGAAAGGGCAGACTTGATAGCTTATCTCAGAAAAGCTAATAATCAGTA	intronic antisense	NM_001167857	PPP1R12B	protein phosphatase 1 regulatory subunit 12B	+	202317829	202407370	287.091	89.8353	8.19067	6.38048	291.628	262.709	306.935	87.2109	90.3927	82.6772	99.0606	8.20142	8.05578	8.31482	6.45432	6.28354	6.33515	6.44892
ASHG19A3A009775	5.17136e-05	3.50688	up	noncoding	ENST00000429682	RP11-396D18.1	Ensembl	325	chr1	-	202338653	202339273	TAAGAAGAAGGCAGAAAGGGCAGACTTGATAGCTTATCTCAGAAAAGCTAATAATCAGTA	intronic antisense	NM_001167858	PPP1R12B	protein phosphatase 1 regulatory subunit 12B	+	202317829	202407370	287.091	89.8353	8.19067	6.38048	291.628	262.709	306.935	87.2109	90.3927	82.6772	99.0606	8.20142	8.05578	8.31482	6.45432	6.28354	6.33515	6.44892
ASHG19A3A009775	5.17136e-05	3.50688	up	noncoding	ENST00000429682	RP11-396D18.1	Ensembl	325	chr1	-	202338653	202339273	TAAGAAGAAGGCAGAAAGGGCAGACTTGATAGCTTATCTCAGAAAAGCTAATAATCAGTA	intronic antisense	NM_002481	PPP1R12B	protein phosphatase 1 regulatory subunit 12B	+	202317829	202557697	287.091	89.8353	8.19067	6.38048	291.628	262.709	306.935	87.2109	90.3927	82.6772	99.0606	8.20142	8.05578	8.31482	6.45432	6.28354	6.33515	6.44892
ASHG19A3A000530	0.000706132	17.1746	up	noncoding	M31164		RNAdb	363	chr2	-	152236007	152236378	GAGATCAAGGAGTTCCAAAAGATTCCAACATAAACACTGTGTGTTTTGATCATCCTTTTT	natural antisense	NM_007115	TNFAIP6	tumor necrosis factor-inducible gene 6 protein	+	152214105	152236562	181.443	13.7221	7.57439	3.47218	179.605	174.388	190.336	9.1066	14.1457	19.1794	12.4566	7.55085	7.50723	7.66507	3.24981	4.0974	2.8973	3.64421
ASHG19A3A038500	6.50506e-05	8.37068	up	noncoding	ENST00000419794	RP11-571F15.6	Ensembl	1249	chr9	+	34318404	34319653	TGGTGATGCACCAGACAGGCCTCTACAACTACTATGACAATGAGAAGGAAAAGCTGCAAA	intronic antisense	NM_194313	KIF24	kinesin-like protein KIF24	-	34252377	34329198	2268.24	255.306	11.0225	7.95716	2322.81	2326.5	2155.42	247.264	273.606	217.685	282.669	11.0381	11.0445	10.9849	8.05423	7.74405	7.89821	8.13215
ASHG19A3A015763	2.99058e-05	2.38953	up	noncoding	ENST00000428093	AC017083.2	Ensembl	483	chr2	+	68352396	68352879	ATGTAGTCTATGGCAAGGTGAAAGAAGGCATGAATATTGTGGAGGCCATGGAGCACTTTG	intergenic							32108.6	10539.3	14.7616	13.5049	32603.9	31581.9	32139.9	10558.5	10475	10750	10373.7	14.7439	14.7327	14.8082	13.4089	13.5442	13.527	13.5393
ASHG19A3A000493	0.00510218	7.30299	up	noncoding	ENST00000512322	RP11-792D21.2	Ensembl	2095	chr4	+	79567370	79603853	GTTGTATGTTTACCCTACCACAAAGATACAGAATTCTGGAGGAAAGTGGCTCTGGGAATT	intergenic							301.12	49.9933	8.25688	5.38839	307.602	294.953	300.805	22.4504	50.1412	65.2836	62.0982	8.27727	8.20804	8.28533	5.76016	5.94542	4.27769	5.57029
ASHG19A3A011609	0.00328766	2.68124	up	noncoding	ENST00000499483	AC007193.1	Ensembl	2711	chr19	-	46893714	46896666	TGACTCTGCCCCTACCCCCTCTGCAAACCTAAAGGGGAATAAATACAAACTTTACAAAGT	natural antisense	NM_001204284	PPP5C	serine/threonine-protein phosphatase 5 isoform	+	46850250	46894232	8925.72	2811.7	12.9553	11.5324	9436.49	8850.34	8490.32	1959.21	3174.66	2922.86	3190.06	13.0118	12.9342	12.92	11.6918	11.6275	11.0294	11.7811
ASHG19A3A011609	0.00328766	2.68124	up	noncoding	ENST00000499483	AC007193.1	Ensembl	2711	chr19	-	46893714	46896666	TGACTCTGCCCCTACCCCCTCTGCAAACCTAAAGGGGAATAAATACAAACTTTACAAAGT	natural antisense	NM_006247	PPP5C	serine/threonine-protein phosphatase 5 isoform	+	46850250	46894232	8925.72	2811.7	12.9553	11.5324	9436.49	8850.34	8490.32	1959.21	3174.66	2922.86	3190.06	13.0118	12.9342	12.92	11.6918	11.6275	11.0294	11.7811
ASHG19A3A035033	0.00646232	2.05942	up	noncoding	NR_024368	FLJ45340	RefSeq_NR	10263	chr7	+	128281294	128301052	AAAGGAAACAGGAAGGATAGATTTGGGGCCAATTATATTACTGTTTGGGTTTTTGTTACT	intergenic							196.448	106.988	7.67826	6.63602	212.529	201.994	174.822	126.252	101.255	105.086	95.3583	7.77804	7.70851	7.54823	6.39833	6.64548	6.88076	6.61951
ASHG19A3A038781	0.00323297	3.51479	up	noncoding	ENST00000447378	RP11-549A6.1	Ensembl	1030	chr9	+	76263743	76264773	ACTTAAAAGACCATGGCCTGTCCGGCACTGCTGAAGGACAAGAAGAAAACTTTATCATTG	intergenic							58.7153	21.6198	6.02393	4.21049	65.3944	57.2951	53.4564	28.1004	21.7734	16.8608	19.7444	6.16192	5.99053	5.91934	4.0049	3.89339	4.62484	4.31884
ASHG19A3A008128	7.60207e-06	2.17608	up	noncoding	AK001838		RNAdb	2116	chr17	-	27584548	27586666	GTCCACTTTAATTTGGAATTCTGTGTGAGCTATGATCCAAGTTATCAGCTCTTTCCAACT	exon sense-overlapping	NM_020772	NUFIP2	nuclear fragile X mental retardation-interacting	-	27582853	27621166	22426.6	8156.56	14.2456	13.1238	22565.2	22733.3	21981.1	8361.98	7855.91	8017.95	8390.41	14.2154	14.2625	14.2587	13.1043	13.1043	13.1748	13.1118
ASHG19A3A041126	4.73504e-05	5.22054	up	noncoding	ENST00000303758	RP13-55H22.2	Ensembl	594	chrX	+	68393966	68394560	AGCCTCTGATGAAGCAGGAGCCAAGACTGATTAGCACCATATACAATGTCTTATCAGTGG	intergenic							413.412	85.4393	8.69165	6.30745	414.821	398.272	427.142	79.1647	82.3189	86.1095	94.1642	8.68753	8.62764	8.75976	6.37821	6.34708	6.18919	6.31531
ASHG19A3A007546	0.000267181	14.4101	up	noncoding	NR_027638	ADAM9	RefSeq_NR	3957	chr8	+	38854504	38962777	GTGGACAGTGGACCTACATACAATGGTCAGATGGCAAAAATCAAGCAAACCCTTCTAGAC	exon sense-overlapping	NM_003816	ADAM9	disintegrin and metalloproteinase	+	38854504	38962779	960.551	69.8969	9.82359	5.97458	992.24	917.242	972.17	48.99	71.3897	68.5586	90.6492	9.85024	9.74414	9.87639	6.32187	6.01552	5.46241	6.09853
ASHG19A3A007546	0.000267181	14.4101	up	noncoding	NR_027638	ADAM9	RefSeq_NR	3957	chr8	+	38854504	38962777	GTGGACAGTGGACCTACATACAATGGTCAGATGGCAAAAATCAAGCAAACCCTTCTAGAC	bidirectional	NM_031940	TM2D2	TM2 domain-containing protein 2 isoform b	-	38846326	38854041	960.551	69.8969	9.82359	5.97458	992.24	917.242	972.17	48.99	71.3897	68.5586	90.6492	9.85024	9.74414	9.87639	6.32187	6.01552	5.46241	6.09853
ASHG19A3A007546	0.000267181	14.4101	up	noncoding	NR_027638	ADAM9	RefSeq_NR	3957	chr8	+	38854504	38962777	GTGGACAGTGGACCTACATACAATGGTCAGATGGCAAAAATCAAGCAAACCCTTCTAGAC	bidirectional	NM_001024380	TM2D2	TM2 domain-containing protein 2 isoform b	-	38846326	38854041	960.551	69.8969	9.82359	5.97458	992.24	917.242	972.17	48.99	71.3897	68.5586	90.6492	9.85024	9.74414	9.87639	6.32187	6.01552	5.46241	6.09853
ASHG19A3A007546	0.000267181	14.4101	up	noncoding	NR_027638	ADAM9	RefSeq_NR	3957	chr8	+	38854504	38962777	GTGGACAGTGGACCTACATACAATGGTCAGATGGCAAAAATCAAGCAAACCCTTCTAGAC	bidirectional	NM_001024381	TM2D2	TM2 domain-containing protein 2 isoform b	-	38846326	38854041	960.551	69.8969	9.82359	5.97458	992.24	917.242	972.17	48.99	71.3897	68.5586	90.6492	9.85024	9.74414	9.87639	6.32187	6.01552	5.46241	6.09853
ASHG19A3A007546	0.000267181	14.4101	up	noncoding	NR_027638	ADAM9	RefSeq_NR	3957	chr8	+	38854504	38962777	GTGGACAGTGGACCTACATACAATGGTCAGATGGCAAAAATCAAGCAAACCCTTCTAGAC	bidirectional	NM_078473	TM2D2	TM2 domain-containing protein 2 isoform a	-	38846326	38854041	960.551	69.8969	9.82359	5.97458	992.24	917.242	972.17	48.99	71.3897	68.5586	90.6492	9.85024	9.74414	9.87639	6.32187	6.01552	5.46241	6.09853
ASHG19A3A014637	8.88041e-06	3.97365	up	noncoding	ENST00000436223	AC013410.1	Ensembl	1232	chr2	-	174439837	174441069	ATTTCTCTGTAGAAGGTCAGTTGGAATTTAGAGCATTGCTACTCATCCCTCAACGGGCTC	intergenic							882.264	218.056	9.70855	7.71809	877.858	875.125	893.81	212.875	223.062	211.157	225.131	9.67744	9.68711	9.76111	7.70076	7.69644	7.66507	7.81008
ASHG19A3A029076	0.000106853	4.35652	up	noncoding	NR_002168	PPP1R2P3	RefSeq_NR	1991	chr5	+	156277548	156279539	GCAGGAAATACAGTTTAACTGCTGAATTTCTATGCCTCTCGATTTACAGATTGCTAATTA	intergenic							391.388	96.9214	8.62	6.49682	378.775	386.276	409.115	89.3212	95.1676	103.509	99.6881	8.56704	8.58305	8.7099	6.4631	6.62173	6.37251	6.52994
ASHG19A3A017663	9.98284e-05	3.85442	up	noncoding	ENST00000421494	HSPEP1	Ensembl	318	chr20	-	38561563	38561881	AGATGACAAGGATTATTCTTATTTAGAGATGGTGACATTCTTGGAAGGAATGTAGACAGA	intergenic							46753.3	9474.88	15.2883	13.3417	47220.1	46603.1	46436.6	8393.22	9199.28	10034.2	10272.9	15.2659	15.2729	15.3259	13.3963	13.4389	13.1807	13.3511
ASHG19A3A026625	1.7877e-05	3.37965	up	noncoding	ENST00000443135	RP4-714D9.4	Ensembl	252	chr1	+	100564794	100565046	AACAGGTCCACATTGGCCAACTGACAAGTTCATTACTGAGAATCAAGAGATGCCTAGGAC	intronic antisense	NM_194292	SASS6	spindle assembly abnormal protein 6 homolog	-	100549101	100598511	113.809	40.3088	6.94165	5.18477	117.191	112.999	111.236	39.4576	41.2742	37.3302	43.1731	6.97236	6.91733	6.93525	5.21648	5.10745	5.13537	5.27979
ASHG19A3A007530	0.00208203	2.1232	up	noncoding	NR_027469	LOC100286793	RefSeq_NR	1195	chr1	-	143718512	143744587	GCATCATTCAACATCGTGAGCACATTTGAGATACTGTACAGGACAACCTGCTTTTCATAT	intergenic							38.9507	23.6814	5.46165	4.37541	44.1224	35.5735	37.1564	20.379	25.3416	24.0692	24.936	5.60762	5.35655	5.42078	4.37791	4.44887	4.13152	4.54334
ASHG19A3A048152	0.0107725	8.34551	up	noncoding	ENST00000501992	AC122688.1	Ensembl	2893	chr12	-	125510477	125513897	TAGAATGATTTCAACCCAGTAATCCTGTGTTCCAATGTGCATGGATAAAGATTTGATCTA	intergenic							90.48	16.3344	6.62875	3.56775	92.1602	93.9962	85.2836	26.6275	6.33517	24.2236	8.15137	6.64248	6.6713	6.57249	2.68163	4.45709	4.54384	2.58846
ASHG19A3A045610	0.000128888	2.41926	up	noncoding	ENST00000414059	RP4-800M22.1	Ensembl	333	chr1	-	52625941	52626274	GAGGAAATCAACAAAGCCTTTGAACTGATGCATTCTGGAAAGAGCATTCGAACTGTTGTA	intronic antisense	NM_004799	ZFYVE9	zinc finger FYVE domain-containing protein 9	+	52608045	52812358	33004.4	10628.9	14.7928	13.5182	34740.3	33842.5	30430.4	10873.5	10331.4	10619.6	10691	14.8323	14.8222	14.7238	13.4591	13.527	13.5748	13.5119
ASHG19A3A045610	0.000128888	2.41926	up	noncoding	ENST00000414059	RP4-800M22.1	Ensembl	333	chr1	-	52625941	52626274	GAGGAAATCAACAAAGCCTTTGAACTGATGCATTCTGGAAAGAGCATTCGAACTGTTGTA	intronic antisense	NM_007323	ZFYVE9	zinc finger FYVE domain-containing protein 9	+	52608045	52729719	33004.4	10628.9	14.7928	13.5182	34740.3	33842.5	30430.4	10873.5	10331.4	10619.6	10691	14.8323	14.8222	14.7238	13.4591	13.527	13.5748	13.5119
ASHG19A3A045610	0.000128888	2.41926	up	noncoding	ENST00000414059	RP4-800M22.1	Ensembl	333	chr1	-	52625941	52626274	GAGGAAATCAACAAAGCCTTTGAACTGATGCATTCTGGAAAGAGCATTCGAACTGTTGTA	intronic antisense	NM_007324	ZFYVE9	zinc finger FYVE domain-containing protein 9	+	52608045	52812358	33004.4	10628.9	14.7928	13.5182	34740.3	33842.5	30430.4	10873.5	10331.4	10619.6	10691	14.8323	14.8222	14.7238	13.4591	13.527	13.5748	13.5119
ASHG19A3A026419	0.000129589	2.41342	up	noncoding	ENST00000509500	U85056.1	Ensembl	2073	chr4	+	190962496	190964569	ACTAAACTTCCAAAAGATGACCTAGGAACCATTCCTTGGGTAAAAGGGACTGAGGAGTGA	intergenic							256.298	115.643	8.03443	6.76335	262.091	266.746	240.057	107.951	118.199	117.787	118.636	8.05678	8.0778	7.96872	6.73477	6.81777	6.64689	6.85398
ASHG19A3A035334	0.0140468	2.2743	up	noncoding	AY927498		RNAdb	209	chr7	+	150759027	150759235	TTGGGTGCTCCGGCCAAGGGTCCTCGCCAACCAGGGGTGTGAGCGTGTGTGAGTGTGGAG	exon sense-overlapping	NM_001199692	SLC4A2	anion exchange protein 2 isoform 1	+	150755298	150773614	165.664	86.153	7.44803	6.26261	180.051	154.052	162.89	125.476	82.9866	55.0832	81.0661	7.55446	7.33923	7.4504	6.16294	5.68831	6.87219	6.327
ASHG19A3A035334	0.0140468	2.2743	up	noncoding	AY927498		RNAdb	209	chr7	+	150759027	150759235	TTGGGTGCTCCGGCCAAGGGTCCTCGCCAACCAGGGGTGTGAGCGTGTGTGAGTGTGGAG	exon sense-overlapping	NM_003040	SLC4A2	anion exchange protein 2 isoform 1	+	150756656	150773614	165.664	86.153	7.44803	6.26261	180.051	154.052	162.89	125.476	82.9866	55.0832	81.0661	7.55446	7.33923	7.4504	6.16294	5.68831	6.87219	6.327
ASHG19A3A024764	5.61288e-05	4.21292	up	noncoding	ENST00000506991	RP11-310A13.2	Ensembl	842	chr4	-	139402408	139403250	TAAGTTGTGAAAAGTGAAAGTGGAGAAGAGATGCTGGTCCCATTCCAAGACCTTCCTGTG	intergenic							1546.73	341.801	10.4739	8.39909	1538.93	1544.91	1556.36	395.795	324.254	313.449	333.707	10.444	10.4566	10.5211	8.30275	8.29828	8.61847	8.37688
CUST_934_PI426073487	0.000292645	2.88908	up	noncoding	uc.455-	uc.455	UCR	245	chr20	-	34328378	34328623	TGAGTGACTTATCGCTGTACCGTGGTCCCCTAGGTAAAATGACTCAACTAAGAATTACCA	intron sense-overlapping	NM_004902	RBM39	RNA-binding protein 39 isoform b	-	34291530	34330193	635.487	220.218	9.26146	7.73085	665.329	636.662	604.471	236.069	217.795	185.475	241.533	9.31186	9.2487	9.22383	7.81508	7.50257	7.82944	7.77632
CUST_934_PI426073487	0.000292645	2.88908	up	noncoding	uc.455-	uc.455	UCR	245	chr20	-	34328378	34328623	TGAGTGACTTATCGCTGTACCGTGGTCCCCTAGGTAAAATGACTCAACTAAGAATTACCA	intron sense-overlapping	NM_184234	RBM39	RNA-binding protein 39 isoform a	-	34291530	34330193	635.487	220.218	9.26146	7.73085	665.329	636.662	604.471	236.069	217.795	185.475	241.533	9.31186	9.2487	9.22383	7.81508	7.50257	7.82944	7.77632
ASHG19A3A019061	0.00506227	11.8109	up	noncoding	ENST00000448152	AF127936.6	Ensembl	962	chr21	+	16146621	16147583	CCAGCTCATTTCCTGGTATAATAATGAATTTGATTACAGCAAGAGTGGCAAACCTTATAG	intergenic							306.874	36.2616	8.28107	4.71902	313.813	286.451	320.358	80.9266	24.0169	18.3382	21.7649	8.30422	8.16986	8.36913	4.16319	4.02573	6.22421	4.46297
CUST_630_PI426073487	4.99839e-05	2.46115	up	noncoding	uc.151-	uc.151	UCR	214	chr5	-	32380136	32380350	CGCTAAGTGGTTCCAGGTTCGGAACATCATTTTACTTTTTTCTTGTAGCCTTATGAGAGA	exon sense-overlapping	NM_016107	ZFR	zinc finger RNA-binding protein	-	32354455	32444844	31.2878	17.0546	5.16399	3.86466	32.2154	30.834	30.8141	17.501	16.2116	15.5761	18.9298	5.16597	5.16283	5.16317	3.93701	3.76195	3.89525	3.86441
ASHG19A3A025688	0.000218392	3.17388	up	noncoding	ENST00000506837	RP11-598G2.1	Ensembl	258	chr4	+	76120037	76120295	TTATTACCTGTCTGGAGCAAAGAAAAGAGCCCTGAAATTTGAAGCGACAGGAGACAGCAG	intergenic							33.3468	14.3032	5.2498	3.58356	32.7756	31.6884	35.5763	13.148	14.7674	13.7562	15.5411	5.19107	5.19997	5.35838	3.62305	3.56027	3.43509	3.71583
ASHG19A3A024035	0.00391035	2.98542	up	noncoding	ENST00000508209	RP11-302F12.7	Ensembl	276	chr4	-	25721376	25721652	GGCCTTTCCTTACTAGTTTCAATCTCCAGTACGTATGGCCTAGATTATGTACAAAATCTG	intergenic							604.439	205.809	9.19067	7.61273	565.808	581.732	665.778	152.908	222.814	208.991	238.525	9.08679	9.1229	9.36231	7.79594	7.68198	7.16453	7.80849
ASHG19A3A011637	0.00189174	2.24411	up	noncoding	ENST00000391892	CTD-2571L23.1	Ensembl	435	chr19	-	48297722	48298159	GCCTTCATTATAGATGTTAAAGCCAAGGAGCACCAGATCAAACAGGCTGTGAAGAAGCTC	intergenic							9740.69	3564.04	13.0673	11.9012	10050.9	8498.11	10673.1	3252.3	3697.82	3750.97	3555.07	13.095	12.8784	13.2286	11.8448	11.9851	11.7758	11.999
ASHG19A3A040628	0.000646829	2.98347	up	noncoding	NR_028057	PLCXD1	RefSeq_NR	2103	chrX	+	192990	220020	AACAGCTTCTCGAGGCTGCACTGCAGAAATGCCAACGAGGACTGGATGTCGGCACTGTGT	exon sense-overlapping	NM_018390	PLCXD1	PI-PLC X domain-containing protein 1	+	198060	220022	57.4091	24.4653	5.98845	4.41146	52.6608	64.2549	55.3117	23.392	26.3319	28.2892	19.848	5.85539	6.14313	5.96685	4.01255	4.69006	4.34325	4.59998
ASHG19A3A026225	0.000287125	3.09393	up	noncoding	ENST00000503611	RP11-597D13.9	Ensembl	2917	chr4	+	159091903	159124029	CTCAGACCAAAATTGAAAGTCATCTATTGTAACTATGTGTTCTTGGCATCTAAACTCTGT	natural antisense	NM_001128424	FAM198B	protein ENED isoform 2	-	159045731	159094202	313.779	110.398	8.31485	6.68541	326.304	324.315	290.718	124.281	95.394	112.329	109.589	8.3605	8.34354	8.24052	6.61171	6.73993	6.85759	6.53242
ASHG19A3A026225	0.000287125	3.09393	up	noncoding	ENST00000503611	RP11-597D13.9	Ensembl	2917	chr4	+	159091903	159124029	CTCAGACCAAAATTGAAAGTCATCTATTGTAACTATGTGTTCTTGGCATCTAAACTCTGT	natural antisense	NM_001031700	FAM198B	protein ENED isoform 1	-	159045731	159094202	313.779	110.398	8.31485	6.68541	326.304	324.315	290.718	124.281	95.394	112.329	109.589	8.3605	8.34354	8.24052	6.61171	6.73993	6.85759	6.53242
ASHG19A3A026225	0.000287125	3.09393	up	noncoding	ENST00000503611	RP11-597D13.9	Ensembl	2917	chr4	+	159091903	159124029	CTCAGACCAAAATTGAAAGTCATCTATTGTAACTATGTGTTCTTGGCATCTAAACTCTGT	natural antisense	NM_016613	FAM198B	protein ENED isoform 2	-	159045731	159093718	313.779	110.398	8.31485	6.68541	326.304	324.315	290.718	124.281	95.394	112.329	109.589	8.3605	8.34354	8.24052	6.61171	6.73993	6.85759	6.53242
ASHG19A3A030427	1.57275e-06	7.07723	up	noncoding	AK097758		misc_RNA	2689	chr6	-	116419291	116422409	CTTACTGATAAAATGCCACAGCTCTTGTATTATCAACTACAAGTTCAGTCTTCTACTTAG	natural antisense	NM_152729	NT5DC1	5'-nucleotidase domain-containing protein 1	+	116421998	116566853	1351.09	184.291	10.2885	7.46531	1350.56	1357.64	1345.07	191.102	177.828	171.975	196.259	10.2691	10.277	10.3193	7.49731	7.38717	7.50723	7.46952
ASHG19A3A035079	5.81062e-06	2.2002	up	noncoding	AK123638		misc_RNA	2113	chr7	+	130149780	130151893	GGGAATGGCTAATTAAAGGACTTGCTTGATAGGAAAGTTATAAACTGATGAATGCTGATA	intronic antisense	NM_012133	COPG2	coatomer subunit gamma-2	-	130146079	130353598	960.627	413.058	9.82521	8.68757	954.417	981.032	946.431	418.01	391.875	418.787	423.562	9.80183	9.83633	9.83747	8.66058	8.73076	8.70344	8.65552
ASHG19A3A044435	1.83605e-05	3.20646	up	noncoding	ENST00000426243	RP11-753C18.7	Ensembl	351	chr10	+	104605351	104605702	GGGTGGTGAAGAGGATGTAGATTTAGCAGATGGAGCAGATGATCATTCACAAGACAGTGA	intergenic							3005.95	818.692	11.4175	9.73648	3151.41	2852.64	3013.81	813.38	799.054	806.708	855.624	11.4654	11.3182	11.4688	9.74414	9.72682	9.73035	9.74462
ASHG19A3A043029	7.8367e-05	3.25632	up	noncoding	ENST00000455013	RP11-369J21.2	Ensembl	417	chr10	-	81784498	81784915	AATGCCCTCTGGGAACCAAAACCGAAAAATGCATCCAAAGTTGCCTATAAAGGAAAAAGT	intergenic							2953.61	799.195	11.3926	9.68932	2925.08	3119.62	2816.12	709.211	783.095	885.523	818.953	11.3568	11.4535	11.3674	9.6739	9.85985	9.51252	9.71101
ASHG19A3A021283	4.10469e-05	3.32076	up	noncoding	BC017743		RNAdb	2299	chr3	-	78870333	78872608	CAGAAACGATGGGAAAATGTGATGAAGAGCATCCCAAGAGCTGAAAATGCATTGGCAAAA	intron sense-overlapping	NM_133631	ROBO1	roundabout homolog 1 isoform b	-	78646387	79068609	3960.2	1027.19	11.8109	10.0793	3846.9	4248.7	3785	945.17	1047.21	1044.34	1072.03	11.7418	11.9038	11.787	10.0869	10.1198	9.96404	10.1466
ASHG19A3A021283	4.10469e-05	3.32076	up	noncoding	BC017743		RNAdb	2299	chr3	-	78870333	78872608	CAGAAACGATGGGAAAATGTGATGAAGAGCATCCCAAGAGCTGAAAATGCATTGGCAAAA	intron sense-overlapping	NM_002941	ROBO1	roundabout homolog 1 isoform a precursor	-	78646387	79817059	3960.2	1027.19	11.8109	10.0793	3846.9	4248.7	3785	945.17	1047.21	1044.34	1072.03	11.7418	11.9038	11.787	10.0869	10.1198	9.96404	10.1466
ASHG19A3A021283	4.10469e-05	3.32076	up	noncoding	BC017743		RNAdb	2299	chr3	-	78870333	78872608	CAGAAACGATGGGAAAATGTGATGAAGAGCATCCCAAGAGCTGAAAATGCATTGGCAAAA	intron sense-overlapping	NM_001145845	ROBO1	roundabout homolog 1 isoform d	-	78646387	79068609	3960.2	1027.19	11.8109	10.0793	3846.9	4248.7	3785	945.17	1047.21	1044.34	1072.03	11.7418	11.9038	11.787	10.0869	10.1198	9.96404	10.1466
ASHG19A3A021156	0.00280457	2.16852	up	noncoding	ENST00000459980	RP11-5O17.2	Ensembl	809	chr3	-	53098298	53099107	TTCCAGAAGCCAGCAGATGATATAACATCTCAGCTGGAGATCAATTTTGGAGACCTTGGC	intergenic							3475.87	1378.08	11.6234	10.5067	3562.72	3356.78	3508.11	1101.41	1448.04	1473.87	1488.99	11.6294	11.5599	11.6809	10.5784	10.6265	10.1858	10.636
ASHG19A3A036142	1.82564e-05	3.53942	up	noncoding	AK027254		NRED	1977	chr8	-	131415817	131417776	ATTCAGTGCTCAGGAAGATTCAATTGCTGTTGGCATCTAAGTTTGAAGGAAATGGTTTGA	intergenic							284.302	88.46	8.17939	6.35588	302.687	268.26	281.958	93.0228	88.8683	75.9049	96.0442	8.25467	8.08632	8.19718	6.4089	6.1611	6.43055	6.42295
ASHG19A3A010004	0.000380805	4.48826	up	noncoding	ENST00000479457	RP11-450D21.1	Ensembl	291	chr1	-	203872850	203873141	TGAAACTGTAACCAAAGGAGGCATTATGCTTCAAGGAAAAGTATTGCAAGCAACAGTAGT	intergenic							35346.7	6327.46	14.8916	12.7254	36703	34388.1	34949	6561.29	6661.05	4680.72	7406.8	14.908	14.841	14.9257	12.9197	12.3102	12.8106	12.8612
ASHG19A3A035955	0.0368396	2.17111	up	noncoding	uc003yft.1	BC089453	UCSC_knowngene	588	chr8	-	94146323	94179079	AGAGTGTGGCGAGGGGAACCTTCTCAGGAAAGAAAATAGAGGTCCTGTTTTAGGAAAAAA	intergenic							21.349	14.3836	4.61913	3.5007	22.4539	14.7263	26.8669	23.1048	10.8439	14.2998	9.28584	4.65268	4.22935	4.97537	2.83279	3.62726	4.32395	3.21878
ASHG19A3A014776	0.0153813	3.07145	up	noncoding	ENST00000411949	AC006460.2	Ensembl	717	chr2	-	191541760	191573442	GGAATGTGGTGTTTATTGAGGAACAGGCAACCCTTACATTTGAATAAAAGATGCCATATA	intronic antisense	NM_005966	NAB1	NGFI-A-binding protein 1	+	191513847	191557492	36.7573	16.8672	5.37665	3.75773	42.9535	34.5605	32.7579	10.6531	14.5582	26.8321	15.4254	5.56862	5.31713	5.24419	3.61144	4.61022	3.11541	3.69384
ASHG19A3A036896	0.00161733	2.26882	up	noncoding	AK125258		misc_RNA	1731	chr8	+	124457771	124459502	ATATGCTTTTTCACTGAGTAGCAATAGAAGTAGTATTTTTGCTAGGCTTGAGTTGCTTAC	intergenic							634.176	273.541	9.25223	8.07029	686.344	666.484	549.699	281.092	276.639	268.644	267.788	9.35301	9.31152	9.09215	7.97004	8.06589	8.0953	8.14991
ASHG19A3A039688	0.000786414	2.93617	up	noncoding	ENST00000325677	RP11-629O4.1	Ensembl	828	chrX	-	25212497	25213327	ACTCAAAATCAGAGCCACGATGACCCAAAGGATAAGAAAGAAAAGAGAGCTCAGGCCCAA	intergenic							317.509	117.135	8.33115	6.77721	332.881	329.224	290.421	122.943	114.154	127.305	104.137	8.38983	8.36452	8.23909	6.53229	6.93447	6.84119	6.80091
ASHG19A3A038877	0.000695489	8.37094	up	noncoding	ENST00000488829	CDC20P	Ensembl	1500	chr9	+	89626566	89628066	TGAAATCCGAAATGACTACTACCTGAATCTTGTGGACTGGAGCTCTGGGAATGTATTGGC	intergenic							577.516	70.7841	9.09257	6.02718	488.137	787.596	456.815	76.9393	64.9274	64.4149	76.8547	8.8952	9.53424	8.84826	6.07974	5.92353	6.14463	5.96081
ASHG19A3A024997	1.22301e-05	4.67475	up	noncoding	ENST00000447996	RP11-100D1.1	Ensembl	1061	chr1	+	82187377	82188749	TGAATGGGTGATTGAACCAGACACTGATGCCCTTTAAGAAATAGGAGATGAAAATGCAGA	intergenic							379.871	88.3401	8.57512	6.35023	401.897	343.494	394.222	97.439	90.3321	71.0697	94.5197	8.64166	8.42441	8.65928	6.38405	6.07383	6.49524	6.44779
ASHG19A3A008093	1.07503e-05	2.94969	up	noncoding	uc001gjk.2	GAS5	UCSC_knowngene	1695	chr1	-	173833039	173837125	AATGGTGAGTTGGGGAACATAGAGAGTACACCTAAGTTCACATGAAGTTGTTTCTTCCCA	bidirectional	NM_032522	ZBTB37	zinc finger and BTB domain-containing protein 37	+	173837492	173842778	926.813	301.062	9.77388	8.21331	935.848	947.391	897.198	308.91	273.031	303.6	318.707	9.76937	9.78636	9.76591	8.23478	8.25264	8.2377	8.12814
ASHG19A3A008093	1.07503e-05	2.94969	up	noncoding	uc001gjk.2	GAS5	UCSC_knowngene	1695	chr1	-	173833039	173837125	AATGGTGAGTTGGGGAACATAGAGAGTACACCTAAGTTCACATGAAGTTGTTTCTTCCCA	bidirectional	NM_001122770	ZBTB37	zinc finger and BTB domain-containing protein 37	+	173837492	173855774	926.813	301.062	9.77388	8.21331	935.848	947.391	897.198	308.91	273.031	303.6	318.707	9.76937	9.78636	9.76591	8.23478	8.25264	8.2377	8.12814
ASHG19A3A031386	5.76743e-06	4.41467	up	noncoding	ENST00000412412	RP11-513I15.3	Ensembl	318	chr6	+	34187217	34187850	ATCCCAAGAAGTACATCCCTGGAACAAAAATGATCTTTGTCGGCATTAAGAAGGAAGAGG	intergenic							47290.1	8346.86	15.3034	13.1611	48388.1	47756.1	45726	8689.15	7901.11	8144.46	8652.73	15.2959	15.3087	15.3057	13.1595	13.1233	13.2439	13.1178
ASHG19A3A025558	2.70103e-08	6.48154	up	noncoding	ENST00000502715	RP11-738E22.1	Ensembl	450	chr4	+	57938848	57939298	CATGCTGCCAAGCTCTGGAAACCCCCCACAGCTTTTAAGAAGCACCTGCAAGAAACCTAC	intronic antisense	NM_001553	IGFBP7	insulin-like growth factor-binding protein 7	-	57897243	57976539	10477.7	1341.24	13.1779	10.4815	10473.1	10532.1	10427.9	1366.66	1322.14	1315.01	1361.14	13.1525	13.1826	13.1986	10.4516	10.4656	10.5121	10.4969
ASHG19A3A027734	1.39197e-05	3.76314	up	noncoding	ENST00000393620	AC146507.1	Ensembl	1011	chr5	-	176692570	176693589	ATATCTTGCATCAAAGATGTGGCCATCAAGGAAACCCTAGTGGATGTGGTGGACCTCAAA	intronic antisense	NM_172349	NSD1	histone-lysine N-methyltransferase, H3 lysine-36	+	176560079	176727214	3136.39	731.984	11.4814	9.56949	3211.42	3184.06	3013.69	758.84	699.924	745.818	723.355	11.4918	11.4842	11.4683	9.48795	9.61432	9.62517	9.5505
ASHG19A3A027734	1.39197e-05	3.76314	up	noncoding	ENST00000393620	AC146507.1	Ensembl	1011	chr5	-	176692570	176693589	ATATCTTGCATCAAAGATGTGGCCATCAAGGAAACCCTAGTGGATGTGGTGGACCTCAAA	intronic antisense	NM_022455	NSD1	histone-lysine N-methyltransferase, H3 lysine-36	+	176560832	176727214	3136.39	731.984	11.4814	9.56949	3211.42	3184.06	3013.69	758.84	699.924	745.818	723.355	11.4918	11.4842	11.4683	9.48795	9.61432	9.62517	9.5505
ASHG19A3A007217	0.000148223	6.67758	up	noncoding	NR_024043	LGALS9	RefSeq_NR	1613	chr17	+	25958173	25976585	CCGTTCTCAGCTCCAGTGGAACCAGATGGAGGGTACGTGGTGTGCAACACGAGGCAGAAC	exon sense-overlapping	NM_009587	LGALS9	galectin-9 isoform long	+	25958173	25976586	298.985	50.2499	8.24664	5.50731	289.366	307.163	300.425	41.3515	51.8896	54.9038	52.8549	8.18877	8.26669	8.28444	5.52098	5.68306	5.2048	5.6204
ASHG19A3A007217	0.000148223	6.67758	up	noncoding	NR_024043	LGALS9	RefSeq_NR	1613	chr17	+	25958173	25976585	CCGTTCTCAGCTCCAGTGGAACCAGATGGAGGGTACGTGGTGTGCAACACGAGGCAGAAC	exon sense-overlapping	NM_002308	LGALS9	galectin-9 isoform short	+	25958173	25976586	298.985	50.2499	8.24664	5.50731	289.366	307.163	300.425	41.3515	51.8896	54.9038	52.8549	8.18877	8.26669	8.28444	5.52098	5.68306	5.2048	5.6204
ASHG19A3A044306	5.01771e-05	5.3899	up	noncoding	BC040942		NRED	1773	chr1	-	42312861	42384340	ACAAACGTCCTGAAGAATGGGAAGAAAGGAGGTTCTGAAGGCACAGATTCCAATACCATG	exon sense-overlapping	NM_024503	HIVEP3	transcription factor HIVEP3	-	41975683	42384496	186.672	40.4213	7.61572	5.18546	191.832	186.452	181.731	38.9057	35.6277	44.4045	42.7474	7.64638	7.59731	7.60348	5.20086	5.36731	5.11557	5.05811
ASHG19A3A044306	5.01771e-05	5.3899	up	noncoding	BC040942		NRED	1773	chr1	-	42312861	42384340	ACAAACGTCCTGAAGAATGGGAAGAAAGGAGGTTCTGAAGGCACAGATTCCAATACCATG	exon sense-overlapping	NM_001127714	HIVEP3	transcription factor HIVEP3 isoform b	-	41975683	42384496	186.672	40.4213	7.61572	5.18546	191.832	186.452	181.731	38.9057	35.6277	44.4045	42.7474	7.64638	7.59731	7.60348	5.20086	5.36731	5.11557	5.05811
ASHG19A3A000334	0.00408452	3.46462	up	noncoding	ENST00000451704	AC015818.3	Ensembl	1104	chr17	-	20422833	20427060	ATGCCCAGGGCTGGTTCTTCAGCTTGAGAGAGGGGCTGAACTGCGAGCTGGCCACCAACA	intergenic							114.972	41.2966	6.95217	5.15947	107.371	110.756	126.789	56.5344	38.2626	44.678	25.7112	6.85288	6.89251	7.11112	4.4205	5.37856	5.67384	5.16498
ASHG19A3L0002750	0.0129354	4.04615	up	noncoding	EB386665	lincRNA-SLN	lincRNA	821	chr11	-	107644071	107644892	GCACAGCCATTTTGTATACTCCCCTGAACTCTTATTCTTTAAGAACGTTGACTTTTCCCC	intergenic							972.87	251.069	9.83453	7.81798	1078.87	948.221	891.515	369.905	138.227	318.642	177.501	9.95724	9.78736	9.759	7.34123	8.32489	8.51569	7.09013
ASHG19A3A032323	0.000984984	3.18311	up	noncoding	AK054948		misc_RNA	1785	chr6	+	166801623	166803408	CTTACACAATCGTTTGGTTCTGTGTGTGGTGAAAACTGAATTGGGGGAAAATCAGATCGG	intergenic							212.469	75.3771	7.78675	6.11631	228.824	205.876	202.707	92.6912	69.3279	69.6744	69.8149	7.87891	7.73368	7.74767	5.93544	6.04407	6.4255	6.06024
ASHG19A3A031228	6.64593e-05	3.47447	up	noncoding	ENST00000453923	BAT1P2	Ensembl	258	chr6	+	29960985	29961382	TTTTTAAAGGCCAATTCTTTGGCTACCAACCCTATTTTGCCCAGGCATGGACATGGAGCA	intergenic							221.328	71.5403	7.83894	6.04215	223.849	206.32	233.815	82.2364	65.3422	64.2237	74.3589	7.84919	7.73668	7.93097	6.03003	5.91947	6.24841	5.9707
ASHG19A3A038051	6.93277e-05	5.59008	up	noncoding	ENST00000439400	RP13-225O21.5	Ensembl	589	chr9	-	130062371	130063261	GTTATTCAGGAAAACTGGCCAGAGGTAAATGATGACAGCACTGAAGATCTTGGAGAAGTA	intronic antisense	NM_032293	GARNL3	GTPase-activating Rap/Ran-GAP domain-like	+	130026755	130155828	606.832	112.623	9.20117	6.7183	615.464	604.996	600.037	102.925	101.619	123.007	122.94	9.21162	9.17786	9.21403	6.78818	6.88314	6.576	6.62587
ASHG19A3A010651	0.000342458	64.1433	up	noncoding	ENST00000498296	RP11-429H5.1	Ensembl	909	chr18	+	47984256	47985165	CCAAACAAAGTTGAAGCCAAGGAAGAGTCAGAGGAGGATATGGAATTTGGTCTCTTTGAC	intergenic							27711.9	390.196	14.5384	8.53514	30514.6	25388.7	27232.4	539.834	259.575	486.3	275.075	14.6459	14.4091	14.5601	8.01441	8.96532	9.10567	8.05517
ASHG19A3A044320	5.95062e-06	5.47792	up	noncoding	AK021443		misc_RNA	1619	chr10	+	96372043	96373661	CAGAATCAGCTTTTAGTTTTGTTAAATCTCTGACATGTTTCGTTGATTCCTGCTTTCATC	intergenic							20244.7	2975.12	14.0986	11.645	20962.6	19632	20139.4	3112.35	2891.05	2969.81	2927.28	14.1148	14.0546	14.1264	11.5694	11.6562	11.7144	11.6399
ASHG19A3A047346	0.000385389	2.84885	up	noncoding	ENST00000483524	RP11-158N24.1	Ensembl	573	chr12	-	12721137	12721710	GTGTTCAAAAACAAGCGTATTCTCATGGAATTGTCCGCAAGCTGAAGGTAGACAAGTCCC	intergenic							4142.14	1241.63	11.8715	10.3611	3880.83	4023.46	4522.14	1246.35	1211.44	1355.38	1153.33	11.7541	11.8164	12.044	10.1998	10.5097	10.3742	10.3609
ASHG19A3A031794	0.0122159	3.84947	up	noncoding	ENST00000407987	RP11-207F8.1	Ensembl	512	chr6	+	86578670	86579182	AATACCTGGAGTGTTCAACCAGGCCTCAAAATAGTGTTTGACGAAGCTATGCAAGCCGTT	intergenic							52.8113	19.2661	5.86849	3.92383	65.4556	46.0344	46.944	31.6572	15.1361	10.1595	20.1118	6.16306	5.69952	5.74287	4.03258	3.09658	4.80842	3.75773
ASHG19A3A042290	7.25486e-06	11.6318	up	noncoding	ENST00000433897	RP11-397A15.4	Ensembl	105	chr1	+	246981377	246981482	TGTCGGGACAAGTTCTCCAAATGTGGCGTGATGGCCAGCAGCGGCCTGTGCCAATCCGTG	intergenic							2380.76	195.18	11.0921	7.5521	2466.48	2412.81	2262.98	204.874	196.922	184.223	194.704	11.1232	11.0959	11.0573	7.48611	7.49003	7.60884	7.62344
ASHG19A3L0001572	0.00584916	2.9404	up	noncoding	BG897081	lincRNA-CSNK1G3-1	lincRNA	416	chr5	-	123716880	123717209	TATTCTCAATAACAGAGAAGAAAAATAGAATTTCTTGCTTTGGGTGTGTGTGTGTGTGTG	intergenic							797.47	274.714	9.56909	8.01308	855.575	746.886	789.948	187.37	317.831	218.841	374.815	9.64278	9.46856	9.59594	8.47585	7.75217	7.47691	8.3474
ASHG19A3A045356	9.11151e-06	2.01688	up	noncoding	ENST00000505544	RP11-399J13.1	Ensembl	468	chr11	-	64942505	64942973	ATTGTCTATGAATGGGACAAGAACTTGAAGCCTATCAAGCCCATGCAGTTTCTGGGGGAT	intergenic							10135.8	4133.05	13.1344	12.1223	9921.41	10427.3	10058.7	4089.87	3992.24	4223.58	4226.51	13.079	13.1656	13.1587	12.0983	12.1644	12.1099	12.1166
ASHG19A3A052690	0.00357765	2.31321	up	noncoding	NR_026589	WHAMML2	RefSeq_NR	5246	chr15	+	28982728	29003507	GAGATAAATTCCTTTAATTAAAAAAAAGCTACTATGAAGGTTGAAAAAATAATTTTTTGG	intergenic							25.1522	14.9249	4.8402	3.63031	25.534	30.618	19.3044	15.5496	10.4086	15.9253	17.8159	4.84556	5.1541	4.52095	3.84379	3.80036	3.71037	3.16671
ASHG19A3A022099	7.9737e-06	5.65544	up	noncoding	ENST00000457027	RP4-603I14.3	Ensembl	370	chr1	+	46836257	46836627	GGTGGACATTGTTATTATAAAAAATACTCAGGTCTTGAGAATTCCTTTGCTGAAGGATCC	intergenic							216.225	43.8666	7.81086	5.31122	225.019	215.823	207.832	46.0869	40.5331	43.8412	45.0053	7.85649	7.79509	7.78101	5.27736	5.34774	5.36952	5.25028
ASHG19A3A029616	0.0117307	4.4623	up	noncoding	ENST00000457888	UBDP1	Ensembl	381	chr6	-	29432372	29437583	GTAGATTATGGCATCAGAAAGGACAAATTACATTTCTTGACATACCACTCCACTGGAGGT	intergenic							28.2363	8.7731	5.00412	2.84633	31.4221	30.9777	22.3091	15.3094	5	9.78297	5	5.1291	5.16959	4.71368	2.32841	3.04246	3.68319	2.33128
ASHG19A3A036578	5.4669e-05	2.07526	up	noncoding	AK056481		misc_RNA	4013	chr8	+	42981892	42985905	TGCTGTCACTGGGTTACTGAGGACTGGGTAGCTTAGTTGAGTAGATAATCTTTTGTTGTT	intergenic							1159.91	511.832	10.076	9.0227	1202.77	1184.8	1092.18	517.963	480.773	528.674	519.918	10.103	10.0929	10.0321	8.98021	9.08833	9.04504	8.97721
ASHG19A3A026490	0.00675891	2.49789	up	noncoding	ENST00000506355	RP11-531A21.2	Ensembl	496	chr5	-	5396585	5397081	TTTATAGGCGTCAATTTAACATTTTTCCCACAGCATTTCCTCGGCCTATCTGACATGCCT	intergenic							2646.25	961.977	11.232	9.91125	2696.41	2276.52	2965.82	1501.37	829.284	752.747	764.51	11.2415	11.014	11.4404	9.56942	9.62517	10.6512	9.79921
ASHG19A3A050599	0.00304214	2.27829	up	noncoding	AK023121		NRED	2735	chr14	-	23474711	23477445	AATTTTCAGATTACGTGGAATCCTTTAAAGACCGCATTCGGCCTTCTGGGTCTACAGCTC	intron sense-overlapping	NM_021944	C14orf93	hypothetical protein LOC60686 precursor	-	23456109	23479360	74.6087	40.1128	6.3523	5.16435	69.248	83.7229	70.8553	40.5378	36.439	34.9187	48.5559	6.24486	6.50425	6.30779	5.39038	5.00385	5.17418	5.08899
ASHG19A3A050599	0.00304214	2.27829	up	noncoding	AK023121		NRED	2735	chr14	-	23474711	23477445	AATTTTCAGATTACGTGGAATCCTTTAAAGACCGCATTCGGCCTTCTGGGTCTACAGCTC	intron sense-overlapping	NM_001130706	C14orf93	hypothetical protein LOC60686 precursor	-	23456109	23479360	74.6087	40.1128	6.3523	5.16435	69.248	83.7229	70.8553	40.5378	36.439	34.9187	48.5559	6.24486	6.50425	6.30779	5.39038	5.00385	5.17418	5.08899
ASHG19A3A050599	0.00304214	2.27829	up	noncoding	AK023121		NRED	2735	chr14	-	23474711	23477445	AATTTTCAGATTACGTGGAATCCTTTAAAGACCGCATTCGGCCTTCTGGGTCTACAGCTC	intron sense-overlapping	NM_001130708	C14orf93	hypothetical protein LOC60686 precursor	-	23456109	23479360	74.6087	40.1128	6.3523	5.16435	69.248	83.7229	70.8553	40.5378	36.439	34.9187	48.5559	6.24486	6.50425	6.30779	5.39038	5.00385	5.17418	5.08899
ASHG19A3A024735	0.0135984	2.21456	up	noncoding	ENST00000503089	RP11-285A15.1	Ensembl	286	chr4	-	134495720	134496363	TTCATTTACTTTCTCGCCTACTTGTGTGAAGCCCAGATCATCACGCTCCAAATGTCAGCA	intergenic							114.957	62.7074	6.95158	5.80455	107.635	128.512	108.723	39.824	64.7125	68.5637	77.7295	6.85593	7.09484	6.90396	6.09764	6.01572	5.14845	5.95641
ASHG19A3A023286	0.0484137	3.38809	up	noncoding	ENST00000487630	RP11-117F22.1	Ensembl	390	chr3	+	138515692	138516082	GCATATATTCAACAGATTCCTGACTATGATGCTTTGAATGTTGCCAACAAAACTGGAATA	intergenic							306.404	122.72	8.28153	6.52106	319.389	308.57	291.255	283.684	58.7819	74.033	74.3814	8.32845	8.2739	8.24224	6.03043	6.13049	8.11081	5.8125
ASHG19A3A020013	1.66572e-05	14.4964	up	noncoding	ENST00000438441	NEK2P2	Ensembl	1338	chr22	+	16364866	16366204	GAAAATCAGAGAAGGCAAATTCAGGCGAATTCTATACCATTACTCTGATGAATTGAATGA	intergenic							747.337	54.0171	9.48155	5.62392	744.493	758.774	738.743	48.9312	58.6402	55.1466	53.3504	9.45632	9.48898	9.49936	5.53502	5.6906	5.45983	5.81025
ASHG19A3A024115	3.98832e-05	3.09959	up	noncoding	ENST00000507778	RP11-457P14.2	Ensembl	552	chr4	-	41844170	41845967	TTGAGCTATAGGAAAGCCTGATGCAGCAAAAAAGGGAGCCATCAAGGCTGAACAAAGCAA	intergenic							3111.82	874.635	11.4672	9.83511	3127.06	3036.32	3172.07	941.019	916.106	804.292	837.122	11.4544	11.4158	11.5313	9.7071	9.72179	9.95819	9.95335
ASHG19A3A027369	1.34085e-07	2.32171	up	noncoding	BC013423		misc_RNA	1454	chr5	-	131525840	131527202	ATAAAATTGTCTCATGCAAAAAACCACTGGGTCTAGGGCAATTGCTATCTACTGCCGTCT	intergenic							900.637	369.617	9.73394	8.51875	922.797	936.59	842.525	360.164	347.388	379.51	391.405	9.74675	9.76883	9.68624	8.54068	8.5796	8.47668	8.47805
ASHG19A3A029214	4.60824e-05	2.11615	up	noncoding	ENST00000433327	RP11-423O2.4	Ensembl	153	chr1	+	142799586	142799739	TCCTGTTTTGAGAATGTTAATGGATACACCAGCTGCTGCTTTGGATTTCACCCATTGGCG	intergenic							407.945	201.317	8.67782	7.59638	416.176	406.933	400.725	195.808	190.439	195.544	223.477	8.69237	8.65832	8.68279	7.69053	7.58114	7.54285	7.571
ASHG19A3A043339	0.00011954	4.72508	up	noncoding	ENST00000447495	RP11-238O13.1	Ensembl	259	chr1	-	36707498	36707757	TCTAATGACATCCAAAGAAAATAAGTAGCTTCCACAGCCACCAGAAGTAAAACCATGACA	intronic antisense	NM_005119	THRAP3	thyroid hormone receptor-associated protein 3	+	36690016	36770957	696.145	148.93	9.38416	7.14382	688.894	643.619	755.921	142.084	150.013	151.936	151.685	9.35843	9.26118	9.53286	7.10884	7.19968	7.05507	7.21169
ASHG19A3A029633	7.70232e-06	2.00979	up	noncoding	NR_001590	IFITM4P	RefSeq_NR	342	chr6	-	29718584	29718925	ATTCACCTACTCCCTGAAGTCTAGGGACAGGAAGATGGTTGGAGACCTGACTGGGGCCCA	intergenic							34165.5	13239.8	14.8471	13.8401	33964.3	34882.9	33649.4	13162.5	12834.2	13539.2	13423.2	14.799	14.8623	14.8802	13.7914	13.8873	13.8435	13.8382
ASHG19A3A026330	0.00140351	2.17653	up	noncoding	ENST00000505816	RP11-598O12.1	Ensembl	425	chr4	+	176883211	176883636	AGCAAAAGCAAGCCTGCCACCAACCTAGGACAATAAGGCAACCTTTTTTGCTTCTCCAAT	intronic antisense	NM_005277	GPM6A	neuronal membrane glycoprotein M6-a isoform 1	-	176554087	176923648	253.715	126.757	8.0151	6.89307	271.084	268.535	221.525	140.55	110.284	129.814	126.379	8.09682	8.0876	7.86087	6.82398	6.96211	7.03751	6.74868
ASHG19A3A026330	0.00140351	2.17653	up	noncoding	ENST00000505816	RP11-598O12.1	Ensembl	425	chr4	+	176883211	176883636	AGCAAAAGCAAGCCTGCCACCAACCTAGGACAATAAGGCAACCTTTTTTGCTTCTCCAAT	intronic antisense	NM_201592	GPM6A	neuronal membrane glycoprotein M6-a isoform 3	-	176554087	176923648	253.715	126.757	8.0151	6.89307	271.084	268.535	221.525	140.55	110.284	129.814	126.379	8.09682	8.0876	7.86087	6.82398	6.96211	7.03751	6.74868
ASHG19A3A007483	9.95009e-06	8.27713	up	noncoding	NR_027167	NCRNA00188	RefSeq_NR	1015	chr17	+	16342300	16345338	GGGTGTGCAAACCCGAGAGAACTGGTCGCTGAAACCTCTACAACTTAGTTGACCGTAACT	natural antisense	NM_001113567	C17orf76	leucine-rich repeat-containing protein C17orf76	-	16345327	16395480	1176.24	139.714	10.0968	7.04766	1202.87	1151.7	1174.14	142.164	133.543	146.233	136.916	10.1032	10.0558	10.1314	6.9545	7.14222	7.05641	7.03751
ASHG19A3A007483	9.95009e-06	8.27713	up	noncoding	NR_027167	NCRNA00188	RefSeq_NR	1015	chr17	+	16342300	16345338	GGGTGTGCAAACCCGAGAGAACTGGTCGCTGAAACCTCTACAACTTAGTTGACCGTAACT	natural antisense	NM_207387	C17orf76	leucine-rich repeat-containing protein C17orf76	-	16345327	16395480	1176.24	139.714	10.0968	7.04766	1202.87	1151.7	1174.14	142.164	133.543	146.233	136.916	10.1032	10.0558	10.1314	6.9545	7.14222	7.05641	7.03751
ASHG19A3A054928	2.947e-05	5.29483	up	noncoding	AK095954		misc_RNA	2410	chr16	+	89630826	89633236	CCAGGCGTAGTTTCATTTGGAATCTGGTTATCCTGTAGTTGCTTTGTTAAAAATATATGT	intergenic							621.337	120.982	9.23262	6.82804	650.885	578.799	634.329	133.418	114.165	117.103	119.241	9.28499	9.11694	9.29594	6.74356	6.80831	6.95907	6.80121
ASHG19A3A024756	0.00730021	2.25666	up	noncoding	ENST00000512676	RP13-884E18.3	Ensembl	535	chr4	-	138523052	138523587	GCAAATAAAGGCTATGCCATCAATCTGTAACGATATTTGCTCCATTTGAAAATGTTATCC	intergenic							28.1689	17.126	5.01471	3.84051	30.2364	29.1852	25.085	14.7317	17.6845	13.3435	22.7444	5.07816	5.0914	4.87456	4.22884	3.50883	3.62135	4.00304
ASHG19A3A024049	0.000193174	7.55051	up	noncoding	ENST00000503460	RP11-292B1.1	Ensembl	968	chr4	-	28824865	28825833	CCTTGAGGTCTTATCGAGTGATTGCCCTTGATTTCTTAGGCTTTGGCTTCAGTGACAAAC	intergenic							475.135	68.3202	8.87329	5.95671	472.536	469.592	483.277	60.9977	60.1125	62.77	89.4005	8.85575	8.84418	8.91993	6.30412	5.88458	5.79171	5.84644
ASHG19A3A029775	0.0232161	2.19235	up	noncoding	ENST00000454398	HLA-DPA3	Ensembl	229	chr6	-	33098992	33111102	ATGTTTGAATCTGATGAAGATGAGCAGTTATTTGTGCACCTGGACAAGAAGGAGATGGTC	intergenic							71.1425	40.449	6.28921	5.15673	69.8672	62.5597	81.0007	27.2264	41.9022	48.9847	43.6827	6.25848	6.10858	6.50059	5.23365	5.51264	4.57991	5.30075
ASHG19A3A031073	0.00235363	3.06603	up	noncoding	ENST00000405676	RP3-425P12.4	Ensembl	1401	chr6	+	25140230	25141631	CCCAAAGTAGTAGTTACCGAAGTAAAAGAAGATGCTTTTTACTCCAAAAAGTGTAAACTG	intergenic							666.484	219.732	9.32863	7.71225	676.676	658.886	663.891	159.492	234.455	232.81	252.171	9.33519	9.29384	9.35685	7.883	7.84781	7.22956	7.88864
ASHG19A3A048934	9.97403e-06	4.43978	up	noncoding	uc001teb.2	CR594785	UCSC_knowngene	2116	chr12	+	95702290	95704406	CTACCCTACCTGAAGACTTGAGATTATAGTCTTTGGGGGGATGGGCAAAGTACTCTCTTT	intergenic							892.929	198.322	9.72384	7.57335	899.08	895.69	884.018	214.784	182.335	190.679	205.49	9.71035	9.71491	9.74628	7.56647	7.54263	7.67832	7.506
ASHG19A3A024958	2.01877e-05	3.02579	up	noncoding	ENST00000425922	ADH5P2	Ensembl	1124	chr1	+	79986764	79987888	TTTTAGTAAACCCACCCAGGAAGTGCTCATTGAGATAATGAGCACTGATGGAGGAGTGGA	intergenic							2056.88	608.188	10.8823	9.28503	2204.87	2016.77	1949	593.376	593.863	612.561	632.954	10.9593	10.8447	10.8431	9.2822	9.31458	9.24513	9.29822
ASHG19A3A009349	0.000118332	3.26043	up	noncoding	NR_024187	SUZ12P	RefSeq_NR	899	chr17	+	29058723	29085351	AATGAAGCCTGTGAAGGGATGAGTGCAGTGGAACCGAAGAAAGTGTCCTTAGTCTGAAAT	intergenic							202.732	70.6292	7.7253	6.02024	206.934	199.217	202.047	66.8552	65.7083	65.7317	84.2217	7.74291	7.68814	7.74486	6.21953	5.9555	5.92715	5.97878
ASHG19A3A040145	0.0107609	6.80357	up	noncoding	ENST00000434069	AC004478.2	Ensembl	851	chrX	-	91237653	91238504	GATTCATCCTTCTTACCTAAGACTGGGGGAAAAAAGATGCTAAAATCAAGACAGGGTACA	intronic antisense	NM_001168361	PCDH11X	protocadherin-11 X-linked isoform f precursor	+	91090459	91878228	2112.19	346.756	10.9234	8.15714	2088.61	2121.65	2126.31	225.42	749.25	193.922	218.432	10.8863	10.9216	10.9624	7.6561	7.56915	7.75648	9.64683
ASHG19A3A040145	0.0107609	6.80357	up	noncoding	ENST00000434069	AC004478.2	Ensembl	851	chrX	-	91237653	91238504	GATTCATCCTTCTTACCTAAGACTGGGGGAAAAAAGATGCTAAAATCAAGACAGGGTACA	intronic antisense	NM_032969	PCDH11X	protocadherin-11 X-linked isoform d precursor	+	91089658	91878228	2112.19	346.756	10.9234	8.15714	2088.61	2121.65	2126.31	225.42	749.25	193.922	218.432	10.8863	10.9216	10.9624	7.6561	7.56915	7.75648	9.64683
ASHG19A3A040145	0.0107609	6.80357	up	noncoding	ENST00000434069	AC004478.2	Ensembl	851	chrX	-	91237653	91238504	GATTCATCCTTCTTACCTAAGACTGGGGGAAAAAAGATGCTAAAATCAAGACAGGGTACA	intronic antisense	NM_001168362	PCDH11X	protocadherin-11 X-linked isoform g precursor	+	91090459	91878228	2112.19	346.756	10.9234	8.15714	2088.61	2121.65	2126.31	225.42	749.25	193.922	218.432	10.8863	10.9216	10.9624	7.6561	7.56915	7.75648	9.64683
ASHG19A3A040145	0.0107609	6.80357	up	noncoding	ENST00000434069	AC004478.2	Ensembl	851	chrX	-	91237653	91238504	GATTCATCCTTCTTACCTAAGACTGGGGGAAAAAAGATGCTAAAATCAAGACAGGGTACA	intronic antisense	NM_001168360	PCDH11X	protocadherin-11 X-linked isoform e precursor	+	91090459	91878228	2112.19	346.756	10.9234	8.15714	2088.61	2121.65	2126.31	225.42	749.25	193.922	218.432	10.8863	10.9216	10.9624	7.6561	7.56915	7.75648	9.64683
ASHG19A3A040145	0.0107609	6.80357	up	noncoding	ENST00000434069	AC004478.2	Ensembl	851	chrX	-	91237653	91238504	GATTCATCCTTCTTACCTAAGACTGGGGGAAAAAAGATGCTAAAATCAAGACAGGGTACA	intronic antisense	NM_032968	PCDH11X	protocadherin-11 X-linked isoform c precursor	+	91089658	91878228	2112.19	346.756	10.9234	8.15714	2088.61	2121.65	2126.31	225.42	749.25	193.922	218.432	10.8863	10.9216	10.9624	7.6561	7.56915	7.75648	9.64683
ASHG19A3A040145	0.0107609	6.80357	up	noncoding	ENST00000434069	AC004478.2	Ensembl	851	chrX	-	91237653	91238504	GATTCATCCTTCTTACCTAAGACTGGGGGAAAAAAGATGCTAAAATCAAGACAGGGTACA	intronic antisense	NM_001168363	PCDH11X	protocadherin-11 X-linked isoform h precursor	+	91090459	91878228	2112.19	346.756	10.9234	8.15714	2088.61	2121.65	2126.31	225.42	749.25	193.922	218.432	10.8863	10.9216	10.9624	7.6561	7.56915	7.75648	9.64683
ASHG19A3A007488	9.68448e-06	4.25238	up	noncoding	NR_027175	NCRNA00188	RefSeq_NR	635	chr17	+	16342300	16373962	CAGCAGCATCTCAGCCCAAGAGAAGGCATGACTCCACAGTTTCTGCAACAACAGAGCCGG	intronic antisense	NM_001113567	C17orf76	leucine-rich repeat-containing protein C17orf76	-	16345327	16395480	1240.76	275.229	10.1666	8.07837	1237.34	1270.75	1214.18	270.476	274.102	262.849	293.488	10.1371	10.188	10.1748	8.11261	8.02851	8.03649	8.13587
ASHG19A3A007488	9.68448e-06	4.25238	up	noncoding	NR_027175	NCRNA00188	RefSeq_NR	635	chr17	+	16342300	16373962	CAGCAGCATCTCAGCCCAAGAGAAGGCATGACTCCACAGTTTCTGCAACAACAGAGCCGG	intronic antisense	NM_207387	C17orf76	leucine-rich repeat-containing protein C17orf76	-	16345327	16395480	1240.76	275.229	10.1666	8.07837	1237.34	1270.75	1214.18	270.476	274.102	262.849	293.488	10.1371	10.188	10.1748	8.11261	8.02851	8.03649	8.13587
ASHG19A3A049498	0.000936941	2.55727	up	noncoding	ENST00000403865	RP11-187A9.2	Ensembl	2162	chr13	-	42643067	42645229	GAAATCTTCCCCTCAAATTCCTCATCAAACATACAGCGGCATTCTGAACATCTGAACTAA	intronic antisense	NM_178009	DGKH	diacylglycerol kinase eta isoform 2	+	42622842	42803891	7481.01	2447.76	12.7021	11.3475	7589.59	7325.79	7527.64	2150.49	2560.84	2132.86	2946.87	12.6977	12.6637	12.7449	11.5812	11.1669	11.1759	11.466
ASHG19A3A049498	0.000936941	2.55727	up	noncoding	ENST00000403865	RP11-187A9.2	Ensembl	2162	chr13	-	42643067	42645229	GAAATCTTCCCCTCAAATTCCTCATCAAACATACAGCGGCATTCTGAACATCTGAACTAA	intronic antisense	NM_152910	DGKH	diacylglycerol kinase eta isoform 1	+	42622842	42803891	7481.01	2447.76	12.7021	11.3475	7589.59	7325.79	7527.64	2150.49	2560.84	2132.86	2946.87	12.6977	12.6637	12.7449	11.5812	11.1669	11.1759	11.466
ASHG19A3A049498	0.000936941	2.55727	up	noncoding	ENST00000403865	RP11-187A9.2	Ensembl	2162	chr13	-	42643067	42645229	GAAATCTTCCCCTCAAATTCCTCATCAAACATACAGCGGCATTCTGAACATCTGAACTAA	intronic antisense	NM_001204504	DGKH	diacylglycerol kinase eta isoform 1	+	42614171	42803891	7481.01	2447.76	12.7021	11.3475	7589.59	7325.79	7527.64	2150.49	2560.84	2132.86	2946.87	12.6977	12.6637	12.7449	11.5812	11.1669	11.1759	11.466
ASHG19A3A040523	0.000387871	3.94917	up	noncoding	ENST00000449219	RP11-504P24.4	Ensembl	758	chr1	+	224183658	224197405	CTGGAATAATATTAATACACACAAAGCACGTGTTGTAACTTTCATTATGCTTCCCTAGAG	intergenic							75.5414	24.0897	6.37405	4.3925	77.5286	81.0086	68.0869	20.4182	25.5013	21.998	28.4412	6.40878	6.46029	6.25308	4.57619	4.30865	4.13406	4.5511
ASHG19A3A022492	0.0163548	2.77804	up	noncoding	ENST00000423702	RP11-626A1.2	Ensembl	319	chr3	+	41996936	41997255	AAGCACACCAAGTTCATGCGGGACATTATTCCAAAGATGTATGGCTTTACTCCCTACGAG	intronic antisense	NM_017886	ULK4	serine/threonine-protein kinase ULK4	-	41288089	42003660	469.792	184.952	8.85945	7.38538	462.272	480.574	466.531	250.71	133.017	240.744	115.339	8.83001	8.87416	8.87416	6.69085	7.89627	7.9218	7.03259
ASHG19A3A021870	0.000734764	2.56857	up	noncoding	ENST00000467631	RP11-20C6.2	Ensembl	1307	chr3	-	161042700	161044007	ATTTTTGGAAGCACTCTGTTAAGGATGGCTGGTCCCTATGGTTCTCTGAGTATCACTTCC	intergenic							1586.64	557.709	10.5053	9.14436	1659.55	1425.29	1675.08	673.894	516.594	525.575	514.774	10.5468	10.3439	10.6252	8.96258	9.07885	9.43744	9.09859
ASHG19A3A018236	0.00234512	2.74676	up	noncoding	ENST00000434010	RPS2P1	Ensembl	821	chr20	+	32710275	32711096	TGAGACCATTGACTTTTTTCTGGGGTCCTCTCTCAAGGAAGAGGGTTTGAAGATTATGCC	intergenic							1797.68	593.23	10.6884	9.23064	1762.06	1798.33	1832.65	465.466	573.573	630.438	703.442	10.6345	10.6713	10.7593	9.4488	9.35555	8.87384	9.24438
CUST_24_PI426075208	0.00150195	2.16888	up	noncoding	nc-HOXA4-62+	nc-HOXA4-62	HOX cluster	148	chr7	+	27171207	27171355	AAGCAACACCTCCACAGAACCGAGCTTTGAAAACAATAACTTCCTATTTCAGAACTATCC	bidirectional	NM_002141	HOXA4	homeobox protein Hox-A4	-	27168125	27170399	120.474	65.0673	7.01585	5.8989	127.43	115.33	118.663	61.918	74.4985	61.6956	62.1572	7.08308	6.94401	7.02047	5.76187	5.85484	5.81472	6.16419
ASHG19A3A031920	9.25197e-07	3.27134	up	noncoding	NR_028595	CCDC162	RefSeq_NR	715	chr6	+	109615505	109629423	CTCCTACTCTCACCCACGATGAATAATGTGTGAGATAAGCAGGGTGTTTGATTTTGAGGC	intergenic							528.323	165.357	9.01167	7.30178	520.326	515.999	548.644	169.944	167.678	154.148	169.657	8.98002	8.96491	9.09007	7.27078	7.22297	7.33008	7.3833
ASHG19A3A019811	0.00485912	2.73977	up	noncoding	uc003awd.2	BC036921	UCSC_knowngene	1323	chr22	-	39066474	39077825	GTCCCCCAAGTTATCATTTGCTTAATATGGAGCTACATATGTTGTGGAAAAGACATAAAA	bidirectional	NM_020243	TOMM22	mitochondrial import receptor subunit TOM22	+	39077953	39080766	471.794	182.164	8.86217	7.40812	491.874	453.963	469.544	135.979	227.302	146.331	219.044	8.9039	8.80151	8.88112	7.6607	7.144	6.98695	7.84081
ASHG19A3A019811	0.00485912	2.73977	up	noncoding	uc003awd.2	BC036921	UCSC_knowngene	1323	chr22	-	39066474	39077825	GTCCCCCAAGTTATCATTTGCTTAATATGGAGCTACATATGTTGTGGAAAAGACATAAAA	natural antisense	NM_015373	CBY1	protein chibby homolog 1 isoform a	+	39052657	39069855	471.794	182.164	8.86217	7.40812	491.874	453.963	469.544	135.979	227.302	146.331	219.044	8.9039	8.80151	8.88112	7.6607	7.144	6.98695	7.84081
ASHG19A3A019811	0.00485912	2.73977	up	noncoding	uc003awd.2	BC036921	UCSC_knowngene	1323	chr22	-	39066474	39077825	GTCCCCCAAGTTATCATTTGCTTAATATGGAGCTACATATGTTGTGGAAAAGACATAAAA	natural antisense	NM_001002880	CBY1	protein chibby homolog 1 isoform b	+	39052657	39069855	471.794	182.164	8.86217	7.40812	491.874	453.963	469.544	135.979	227.302	146.331	219.044	8.9039	8.80151	8.88112	7.6607	7.144	6.98695	7.84081
ASHG19A3A055144	0.000153117	11.6562	up	noncoding	uc002lal.1	LOC647946	UCSC_knowngene	2306	chr18	-	36786887	37380282	GCGCAATGTGGGGGCACCAGAAGCGGGCACCGTTGAGCTGTTGCAACTGTTCTGCTGGTA	intergenic							197.24	20.5756	7.6889	4.14587	200.135	192.446	199.138	15.7992	22.2683	20.8675	23.3674	7.70268	7.63894	7.72508	4.2734	4.22616	3.73539	4.34855
ASHG19A3A009372	0.00844537	2.42623	up	noncoding	NR_033412	SH3GL1P1	RefSeq_NR	2497	chr17	+	30367354	30369851	GTTCAGGGCAAACTGAAATGTATGCCCGAATTTTGTAAACAGAAGTATTAAAGGTCTTTC	intron sense-overlapping	NM_052888	LRRC37B	leucine-rich repeat-containing protein 37B	+	30348154	30380519	2733.49	1013.67	11.2819	10.0032	2741.16	2603.45	2855.85	1115.91	1122.21	597.008	1219.53	11.2626	11.1974	11.3857	10.282	9.27482	10.2067	10.2492
ASHG19A3A049779	1.34098e-05	2.90212	up	noncoding	ENST00000394213	RP11-461N23.3	Ensembl	387	chr13	-	99867625	99868012	GGTGTCATTCCACACATCCACAAATCTCTGATTGGGAAGAAAGGACAACAGAAGACTGTC	intronic antisense	NM_001144072	UBAC2	ubiquitin-associated domain-containing protein 2	+	99852678	100038753	93443.9	24585	16.2787	14.7416	96493.1	94916.3	88922.3	22819.4	24865.3	24775.4	25879.9	16.2729	16.2951	16.2681	14.7599	14.7583	14.6579	14.7904
ASHG19A3A049779	1.34098e-05	2.90212	up	noncoding	ENST00000394213	RP11-461N23.3	Ensembl	387	chr13	-	99867625	99868012	GGTGTCATTCCACACATCCACAAATCTCTGATTGGGAAGAAAGGACAACAGAAGACTGTC	intronic antisense	NM_177967	UBAC2	ubiquitin-associated domain-containing protein 2	+	99853162	100038753	93443.9	24585	16.2787	14.7416	96493.1	94916.3	88922.3	22819.4	24865.3	24775.4	25879.9	16.2729	16.2951	16.2681	14.7599	14.7583	14.6579	14.7904
ASHG19A3A045775	0.005174	4.24407	up	noncoding	BC016877		misc_RNA	3115	chr11	-	119175362	119177480	CAAGGCCAACTGCTCAGAGATAGATACTTGATCAATGTGCTGGGCTGAGTGTAGTTTTTT	natural antisense	NM_005188	CBL	E3 ubiquitin-protein ligase CBL	+	119076989	119178859	40.6012	13.4811	5.50664	3.42119	50.0627	32.6225	39.1184	20.0292	13.7467	6.15409	13.9945	5.78376	5.24212	5.49403	3.4457	2.54185	4.10371	3.59351
ASHG19A3A007404	0.000748623	2.41193	up	noncoding	NR_026735	GPN1	RefSeq_NR	1742	chr2	+	27851862	27873711	ATGAAGTTCCCTTTCCTGCCAATATTGGTGATGAAATTTATTGAGAAGGCCCAGAACATG	natural antisense	NM_024584	CCDC121	coiled-coil domain-containing protein 121	-	27848505	27851898	873.18	348.198	9.69423	8.42405	898.826	869.047	851.666	409.575	324.044	335.062	324.109	9.70983	9.67471	9.69817	8.25666	8.39183	8.67125	8.37644
ASHG19A3A007404	0.000748623	2.41193	up	noncoding	NR_026735	GPN1	RefSeq_NR	1742	chr2	+	27851862	27873711	ATGAAGTTCCCTTTCCTGCCAATATTGGTGATGAAATTTATTGAGAAGGCCCAGAACATG	natural antisense	NM_014860	SUPT7L	STAGA complex 65 subunit gamma	-	27873678	27886449	873.18	348.198	9.69423	8.42405	898.826	869.047	851.666	409.575	324.044	335.062	324.109	9.70983	9.67471	9.69817	8.25666	8.39183	8.67125	8.37644
ASHG19A3A007404	0.000748623	2.41193	up	noncoding	NR_026735	GPN1	RefSeq_NR	1742	chr2	+	27851862	27873711	ATGAAGTTCCCTTTCCTGCCAATATTGGTGATGAAATTTATTGAGAAGGCCCAGAACATG	exon sense-overlapping	NM_001145048	GPN1	GPN-loop GTPase 1 isoform c	+	27851514	27873713	873.18	348.198	9.69423	8.42405	898.826	869.047	851.666	409.575	324.044	335.062	324.109	9.70983	9.67471	9.69817	8.25666	8.39183	8.67125	8.37644
ASHG19A3A007404	0.000748623	2.41193	up	noncoding	NR_026735	GPN1	RefSeq_NR	1742	chr2	+	27851862	27873711	ATGAAGTTCCCTTTCCTGCCAATATTGGTGATGAAATTTATTGAGAAGGCCCAGAACATG	bidirectional	NM_001142683	CCDC121	coiled-coil domain-containing protein 121	-	27848505	27851745	873.18	348.198	9.69423	8.42405	898.826	869.047	851.666	409.575	324.044	335.062	324.109	9.70983	9.67471	9.69817	8.25666	8.39183	8.67125	8.37644
ASHG19A3A007404	0.000748623	2.41193	up	noncoding	NR_026735	GPN1	RefSeq_NR	1742	chr2	+	27851862	27873711	ATGAAGTTCCCTTTCCTGCCAATATTGGTGATGAAATTTATTGAGAAGGCCCAGAACATG	exon sense-overlapping	NM_001145049	GPN1	GPN-loop GTPase 1 isoform d	+	27851514	27873713	873.18	348.198	9.69423	8.42405	898.826	869.047	851.666	409.575	324.044	335.062	324.109	9.70983	9.67471	9.69817	8.25666	8.39183	8.67125	8.37644
ASHG19A3A007404	0.000748623	2.41193	up	noncoding	NR_026735	GPN1	RefSeq_NR	1742	chr2	+	27851862	27873711	ATGAAGTTCCCTTTCCTGCCAATATTGGTGATGAAATTTATTGAGAAGGCCCAGAACATG	exon sense-overlapping	NM_007266	GPN1	GPN-loop GTPase 1 isoform a	+	27851862	27873713	873.18	348.198	9.69423	8.42405	898.826	869.047	851.666	409.575	324.044	335.062	324.109	9.70983	9.67471	9.69817	8.25666	8.39183	8.67125	8.37644
ASHG19A3A007404	0.000748623	2.41193	up	noncoding	NR_026735	GPN1	RefSeq_NR	1742	chr2	+	27851862	27873711	ATGAAGTTCCCTTTCCTGCCAATATTGGTGATGAAATTTATTGAGAAGGCCCAGAACATG	exon sense-overlapping	NM_001145047	GPN1	GPN-loop GTPase 1 isoform b	+	27851514	27873713	873.18	348.198	9.69423	8.42405	898.826	869.047	851.666	409.575	324.044	335.062	324.109	9.70983	9.67471	9.69817	8.25666	8.39183	8.67125	8.37644
ASHG19A3A000502	0.000278229	2.66479	up	noncoding	ENST00000513560	RP11-159F24.1	Ensembl	1040	chr5	-	43575424	43603206	agaagaatctagacagacaggcctttctaggctgtacaagaagcatgatgccagcatctg	natural antisense	NM_012343	NNT	NAD(P) transhydrogenase, mitochondrial	+	43602790	43705668	172.747	73.9777	7.50815	6.09413	172.484	167.113	178.644	70.1261	71.1528	78.2551	76.3766	7.49554	7.44723	7.58168	6.07195	6.2084	6.00182	6.09435
ASHG19A3A000502	0.000278229	2.66479	up	noncoding	ENST00000513560	RP11-159F24.1	Ensembl	1040	chr5	-	43575424	43603206	agaagaatctagacagacaggcctttctaggctgtacaagaagcatgatgccagcatctg	bidirectional	NM_182977	NNT	NAD(P) transhydrogenase, mitochondrial	+	43603228	43705668	172.747	73.9777	7.50815	6.09413	172.484	167.113	178.644	70.1261	71.1528	78.2551	76.3766	7.49554	7.44723	7.58168	6.07195	6.2084	6.00182	6.09435
ASHG19A3A000294	0.00795629	5.72739	up	noncoding	ENST00000446372	SFTA1P	Ensembl	873	chr10	-	10826401	10836877	TTCCCTGTGACCTCCTGCAAATAAGGACAGGGACATACTAGGTAGGAGAAGGCAGTTACC	intergenic							228.847	49.5523	7.88083	5.36295	243.67	200.297	242.575	76.896	27.4756	60.8701	32.9675	7.9621	7.6954	7.98497	4.80469	5.83538	6.14372	4.66799
ASHG19A3A034516	0.000244583	3.79061	up	noncoding	NR_024109	SBDSP1	RefSeq_NR	870	chr7	+	72299951	72304585	TCTTTGCTTCATGTTACCTAAATATTGTATTCTCTAGTAATAAATTTGTAGCAAACATTC	intergenic							458.947	127.813	8.82914	6.90671	480.502	442.188	454.15	122.144	110.835	143.137	135.135	8.87753	8.76764	8.84227	6.93059	7.10695	6.83262	6.75669
ASHG19A3A017413	0.000582912	3.72328	up	noncoding	ENST00000431038	RP11-379J5.4	Ensembl	189	chr20	-	18623470	18623981	GGCATTTATGAAAAACCCATACCCTGGGATTGATTCCAGAGAACAAATTGCTAAATAAAT	intronic antisense	NM_080820	DTD1	D-tyrosyl-tRNA(Tyr) deacylase 1	+	18568555	18744560	204.238	62.9954	7.73189	5.83531	225.785	200.465	186.463	62.8458	64.6624	47.5402	76.933	7.86029	7.69644	7.63894	6.08138	5.46902	5.83554	5.95531
ASHG19A3A013930	0.000375643	10.1428	up	noncoding	ENST00000398295	AC010087.5	Ensembl	965	chr2	-	85004382	85005347	GATCTGTTTGAAGAAGAGTGCATTTACACTTTGGGGAATCCAAAAAACCTGCAATTTTAT	intronic antisense	NM_001370	DNAH6	dynein heavy chain 6, axonemal	+	84743578	85046713	153.383	19.1852	7.34063	3.99824	163.969	132.471	163.709	27.5333	14.5575	15.1241	19.526	7.43089	7.13541	7.45558	3.98609	3.71714	4.59609	3.69364
CUST_191_PI426073487	0.00164865	3.33662	up	noncoding	uc.193+	uc.193	UCR	319	chr6	+	86321685	86322004	GTACAGTACAGACAGGGTATAGTTCAATCCTCTGCTACTGAGGTAGTTAACCAACCCTTT	natural antisense	NM_001159673	SYNCRIP	heterogeneous nuclear ribonucleoprotein Q	-	86317501	86352640	43.8242	17.8307	5.62313	3.88474	48.4043	37.6628	45.4056	24.2371	14.9274	12.6933	19.465	5.73893	5.43139	5.69907	3.9812	3.42808	4.39695	3.73272
CUST_191_PI426073487	0.00164865	3.33662	up	noncoding	uc.193+	uc.193	UCR	319	chr6	+	86321685	86322004	GTACAGTACAGACAGGGTATAGTTCAATCCTCTGCTACTGAGGTAGTTAACCAACCCTTT	natural antisense	NM_001159674	SYNCRIP	heterogeneous nuclear ribonucleoprotein Q	-	86317501	86352608	43.8242	17.8307	5.62313	3.88474	48.4043	37.6628	45.4056	24.2371	14.9274	12.6933	19.465	5.73893	5.43139	5.69907	3.9812	3.42808	4.39695	3.73272
CUST_191_PI426073487	0.00164865	3.33662	up	noncoding	uc.193+	uc.193	UCR	319	chr6	+	86321685	86322004	GTACAGTACAGACAGGGTATAGTTCAATCCTCTGCTACTGAGGTAGTTAACCAACCCTTT	natural antisense	NM_001159676	SYNCRIP	heterogeneous nuclear ribonucleoprotein Q	-	86317501	86351169	43.8242	17.8307	5.62313	3.88474	48.4043	37.6628	45.4056	24.2371	14.9274	12.6933	19.465	5.73893	5.43139	5.69907	3.9812	3.42808	4.39695	3.73272
CUST_191_PI426073487	0.00164865	3.33662	up	noncoding	uc.193+	uc.193	UCR	319	chr6	+	86321685	86322004	GTACAGTACAGACAGGGTATAGTTCAATCCTCTGCTACTGAGGTAGTTAACCAACCCTTT	natural antisense	NM_001159677	SYNCRIP	heterogeneous nuclear ribonucleoprotein Q	-	86317501	86353043	43.8242	17.8307	5.62313	3.88474	48.4043	37.6628	45.4056	24.2371	14.9274	12.6933	19.465	5.73893	5.43139	5.69907	3.9812	3.42808	4.39695	3.73272
ASHG19A3A029380	3.26545e-05	3.56826	up	noncoding	ENST00000440581	RP11-288G3.4	Ensembl	1241	chr6	-	7516832	7518073	TTGGCTGCTTGCATTAAAGGTTTACCCAGTGCGCAATGTTCTGACTACTTGAATACTTTT	intergenic							17952.3	4072.75	13.9312	12.096	18153.7	18088.5	17614.7	4134.12	4099.4	3696.45	4361.05	13.9181	13.9351	13.9404	12.1413	11.964	12.1274	12.1514
ASHG19A3A016808	0.000493368	2.13811	up	noncoding	AK125394		misc_RNA	2341	chr2	+	202034061	202036402	TTGCCACTATGGATGAATCTTATTTACTCAATATTAATTACTTACAAATAACCTCACCTA	exon sense-overlapping	NM_001202519	CFLAR	CASP8 and FADD-like apoptosis regulator isoform	+	201980876	202037411	261.145	132.409	8.06002	6.96368	271.792	250.26	261.383	123.391	121.788	136.897	147.56	8.10031	7.99215	8.0876	7.06893	7.04028	6.84709	6.89844
ASHG19A3A016808	0.000493368	2.13811	up	noncoding	AK125394		misc_RNA	2341	chr2	+	202034061	202036402	TTGCCACTATGGATGAATCTTATTTACTCAATATTAATTACTTACAAATAACCTCACCTA	exon sense-overlapping	NM_001202516	CFLAR	CASP8 and FADD-like apoptosis regulator isoform	+	201980876	202037411	261.145	132.409	8.06002	6.96368	271.792	250.26	261.383	123.391	121.788	136.897	147.56	8.10031	7.99215	8.0876	7.06893	7.04028	6.84709	6.89844
ASHG19A3A016808	0.000493368	2.13811	up	noncoding	AK125394		misc_RNA	2341	chr2	+	202034061	202036402	TTGCCACTATGGATGAATCTTATTTACTCAATATTAATTACTTACAAATAACCTCACCTA	exon sense-overlapping	NM_001202517	CFLAR	CASP8 and FADD-like apoptosis regulator isoform	+	201980876	202037411	261.145	132.409	8.06002	6.96368	271.792	250.26	261.383	123.391	121.788	136.897	147.56	8.10031	7.99215	8.0876	7.06893	7.04028	6.84709	6.89844
ASHG19A3A016808	0.000493368	2.13811	up	noncoding	AK125394		misc_RNA	2341	chr2	+	202034061	202036402	TTGCCACTATGGATGAATCTTATTTACTCAATATTAATTACTTACAAATAACCTCACCTA	exon sense-overlapping	NM_001202515	CFLAR	CASP8 and FADD-like apoptosis regulator isoform	+	202004997	202037411	261.145	132.409	8.06002	6.96368	271.792	250.26	261.383	123.391	121.788	136.897	147.56	8.10031	7.99215	8.0876	7.06893	7.04028	6.84709	6.89844
ASHG19A3A016808	0.000493368	2.13811	up	noncoding	AK125394		misc_RNA	2341	chr2	+	202034061	202036402	TTGCCACTATGGATGAATCTTATTTACTCAATATTAATTACTTACAAATAACCTCACCTA	exon sense-overlapping	NM_001202518	CFLAR	CASP8 and FADD-like apoptosis regulator isoform	+	201997687	202037411	261.145	132.409	8.06002	6.96368	271.792	250.26	261.383	123.391	121.788	136.897	147.56	8.10031	7.99215	8.0876	7.06893	7.04028	6.84709	6.89844
ASHG19A3A016808	0.000493368	2.13811	up	noncoding	AK125394		misc_RNA	2341	chr2	+	202034061	202036402	TTGCCACTATGGATGAATCTTATTTACTCAATATTAATTACTTACAAATAACCTCACCTA	exon sense-overlapping	NM_001127183	CFLAR	CASP8 and FADD-like apoptosis regulator isoform	+	201983268	202037411	261.145	132.409	8.06002	6.96368	271.792	250.26	261.383	123.391	121.788	136.897	147.56	8.10031	7.99215	8.0876	7.06893	7.04028	6.84709	6.89844
ASHG19A3A016808	0.000493368	2.13811	up	noncoding	AK125394		misc_RNA	2341	chr2	+	202034061	202036402	TTGCCACTATGGATGAATCTTATTTACTCAATATTAATTACTTACAAATAACCTCACCTA	exon sense-overlapping	NM_003879	CFLAR	CASP8 and FADD-like apoptosis regulator isoform	+	201980876	202037411	261.145	132.409	8.06002	6.96368	271.792	250.26	261.383	123.391	121.788	136.897	147.56	8.10031	7.99215	8.0876	7.06893	7.04028	6.84709	6.89844
ASHG19A3A039015	1.5739e-05	3.07823	up	noncoding	ENST00000428299	RP11-270F18.2	Ensembl	506	chr9	+	100997009	100997818	ACAGTTACAAGGAATTCCAGTGCTAGTACTTGGAAGCAAGAGAGAGATCTTTCTAATGCC	intronic antisense	NM_018421	TBC1D2	TBC1 domain family member 2A	-	100961279	101018003	611.582	200.013	9.21053	7.58843	634.854	602.897	596.996	197.384	186.054	204.01	212.605	9.25248	9.17301	9.2061	7.61685	7.64353	7.55541	7.53792
ASHG19A3A028474	0.000880252	5.47831	up	noncoding	ENST00000512479	CTC-447O6.1	Ensembl	322	chr5	+	85383343	85383665	CTGGTTGATGTATTGCTATTCATTGTGTTGCAGGCCTTCAGAGAGCTCCAATACTTGTTG	intergenic							131.098	29.5707	7.13343	4.6797	134.874	130.77	127.649	22.67	23.4586	35.3884	36.766	7.16159	7.11764	7.12104	4.97135	5.02487	4.29479	4.42778
ASHG19A3A028338	0.000288957	2.09822	up	noncoding	uc001edc.1	BC047723	UCSC_knowngene	1208	chr1	+	113499036	113542118	GAAAATGCCGGACTGTTGTTTGCAAGCTGGTTAAGTGAGCAAATCTTGGGAAGATTTCAA	bidirectional	NM_001166496	SLC16A1	monocarboxylate transporter 1	-	113454469	113498685	233.112	121.628	7.90517	6.836	242.214	254.077	203.045	119.306	114.985	119.865	132.356	7.95456	8.01104	7.7499	6.89714	6.8439	6.79153	6.81145
ASHG19A3A028338	0.000288957	2.09822	up	noncoding	uc001edc.1	BC047723	UCSC_knowngene	1208	chr1	+	113499036	113542118	GAAAATGCCGGACTGTTGTTTGCAAGCTGGTTAAGTGAGCAAATCTTGGGAAGATTTCAA	bidirectional	NM_003051	SLC16A1	monocarboxylate transporter 1	-	113454469	113498975	233.112	121.628	7.90517	6.836	242.214	254.077	203.045	119.306	114.985	119.865	132.356	7.95456	8.01104	7.7499	6.89714	6.8439	6.79153	6.81145
ASHG19A3A039148	0.00134465	12.4431	up	noncoding	ENST00000380194	RP11-78H18.2	Ensembl	2992	chr9	+	117607873	117610865	GGACAGATGCCAAATGAGATGATTCAAAAGGTGTATTCAAAGATCAGCATTTTGATCAAA	intergenic							134.791	14.9013	7.15422	3.51695	141.838	106.753	155.78	16.3931	10.232	7.85655	25.1235	7.23183	6.84058	7.39025	4.38841	2.74684	3.7907	3.14184
ASHG19A3A000500	0.000129053	3.8263	up	noncoding	ENST00000513057	AC093927.1	Ensembl	1263	chr3	+	24132679	24323468	cggtctatcaattttgttgatcctttcaaaagcaagtcctgagtgacctacaaagagagt	intronic antisense	NM_001128177	THRB	thyroid hormone receptor beta	-	24158644	24536313	1202.68	297.627	10.1238	8.18787	1239.92	1141.1	1227.01	350.47	267.859	256.324	315.855	10.1418	10.0397	10.1899	8.22313	7.99123	8.43723	8.09988
ASHG19A3A000500	0.000129053	3.8263	up	noncoding	ENST00000513057	AC093927.1	Ensembl	1263	chr3	+	24132679	24323468	cggtctatcaattttgttgatcctttcaaaagcaagtcctgagtgacctacaaagagagt	intronic antisense	NM_000461	THRB	thyroid hormone receptor beta	-	24158644	24536313	1202.68	297.627	10.1238	8.18787	1239.92	1141.1	1227.01	350.47	267.859	256.324	315.855	10.1418	10.0397	10.1899	8.22313	7.99123	8.43723	8.09988
ASHG19A3A000500	0.000129053	3.8263	up	noncoding	ENST00000513057	AC093927.1	Ensembl	1263	chr3	+	24132679	24323468	cggtctatcaattttgttgatcctttcaaaagcaagtcctgagtgacctacaaagagagt	intronic antisense	NM_001128176	THRB	thyroid hormone receptor beta	-	24158644	24536266	1202.68	297.627	10.1238	8.18787	1239.92	1141.1	1227.01	350.47	267.859	256.324	315.855	10.1418	10.0397	10.1899	8.22313	7.99123	8.43723	8.09988
ASHG19A3A038866	0.000105435	3.49714	up	noncoding	ENST00000395835	RP11-213G2.4	Ensembl	816	chr9	+	88513818	88514636	CAGGACATTGTGGTAGGCAAAGGGACTCACTGTCTCATCCCATGGTTACAGAAATCAATA	intergenic							505.137	149.286	8.95172	7.14555	504.689	521.564	489.159	166.414	144.334	147.193	139.202	8.93751	8.97931	8.93835	6.9776	7.15326	7.29664	7.15469
ASHG19A3A018947	0.000641189	2.67979	up	noncoding	ENST00000427188	C21orf84	Ensembl	967	chr21	-	44890312	44891472	GGAAGACCTGTTTCTTTTACTTTCCTTGAGGAGAAAAAATTAAAGTTCTGAGCAAACGCA	intergenic							106.621	47.8487	6.85252	5.4304	104.795	110.095	104.972	43.389	42.7282	46.9111	58.3666	6.8201	6.8832	6.85426	5.66753	5.44927	5.27736	5.32744
ASHG19A3A017097	0.00852137	2.03943	up	noncoding	AK091620		misc_RNA	2276	chr2	+	233210977	233213250	ATTGCGATGAAAATGGGAAACATGGCTGGAACCCATCATCTAATCCGGATCACACTGCAT	intergenic							37.113	23.9029	5.39641	4.36824	39.065	37.0401	35.2337	31.8067	18.6724	21.6737	23.4588	5.43624	5.40931	5.34369	4.27903	4.28489	4.81477	4.09428
ASHG19A3A042862	0.000586501	3.34431	up	noncoding	ENST00000448009	RP11-111N20.3	Ensembl	511	chr10	-	65394076	65394587	CTGCAATAAAACCCAGAGTAAACTCTTAAGATAAAATGGCGACGTCATTCTGGGAGAGGT	intergenic							3957.7	1027.55	11.8066	10.0649	4055.68	3835.18	3982.24	1230.72	831.701	983.018	1064.78	11.8213	11.7414	11.857	10.0749	10.0287	10.3529	9.80296
ASHG19A3A034464	0.000544401	10.6314	up	noncoding	ENST00000447960	RP11-746P2.3	Ensembl	1243	chr7	+	64820846	64822089	GTCTGTAATACCTGTTATCTTACTTGATATGGAAGAGTTCATACCGACTAGTAGTGTTAT	intergenic							103.014	12.9554	6.80213	3.39187	110.503	99.734	98.8051	16.3979	13.9884	8.36685	13.0683	6.88922	6.74983	6.76735	3.32627	2.82278	3.79145	3.62698
ASHG19A3A014941	4.42619e-05	3.37896	up	noncoding	ENST00000429485	AC016697.2	Ensembl	615	chr2	-	209134066	209134681	AAGTTTAACAAGGATCAGCTGGAGGAGTTCAAGGTGGCCTTCAAGCTGTTTAACTGAGTG	intronic antisense	NM_152671	PIKFYVE	1-phosphatidylinositol-3-phosphate 5-kinase	+	209130990	209170271	546.337	164.702	9.05215	7.29557	575.505	543.906	519.6	160.028	162.789	169.582	166.411	9.10934	9.03259	9.01452	7.24228	7.36639	7.23477	7.33884
ASHG19A3A014941	4.42619e-05	3.37896	up	noncoding	ENST00000429485	AC016697.2	Ensembl	615	chr2	-	209134066	209134681	AAGTTTAACAAGGATCAGCTGGAGGAGTTCAAGGTGGCCTTCAAGCTGTTTAACTGAGTG	intronic antisense	NM_015040	PIKFYVE	1-phosphatidylinositol-3-phosphate 5-kinase	+	209130990	209223475	546.337	164.702	9.05215	7.29557	575.505	543.906	519.6	160.028	162.789	169.582	166.411	9.10934	9.03259	9.01452	7.24228	7.36639	7.23477	7.33884
ASHG19A3A014941	4.42619e-05	3.37896	up	noncoding	ENST00000429485	AC016697.2	Ensembl	615	chr2	-	209134066	209134681	AAGTTTAACAAGGATCAGCTGGAGGAGTTCAAGGTGGCCTTCAAGCTGTTTAACTGAGTG	intronic antisense	NM_001178000	PIKFYVE	1-phosphatidylinositol-3-phosphate 5-kinase	+	209130990	209170271	546.337	164.702	9.05215	7.29557	575.505	543.906	519.6	160.028	162.789	169.582	166.411	9.10934	9.03259	9.01452	7.24228	7.36639	7.23477	7.33884
ASHG19A3A015076	0.000259053	3.52222	up	noncoding	ENST00000439598	AC097662.2	Ensembl	3124	chr2	-	228085767	228189880	CAGGCTGACTGATATGAAGACTTATCAAATGAGATGTGGATATTTCAAATAAAGCAAACG	natural antisense	NM_000091	COL4A3	collagen alpha-3(IV) chain precursor	+	228029280	228179508	277.894	87.0203	8.14564	6.32916	276.94	282.526	274.215	73.45	90.1905	91.5235	92.9171	8.12545	8.15382	8.15766	6.35974	6.43835	6.07263	6.44592
ASHG19A3A029595	0.0314239	3.23859	up	noncoding	ENST00000440030	NOL5BP	Ensembl	372	chr6	-	28751409	28751781	AACAGTTAATGACACCGAAGAGTCAGGCCACAGAAGTGGCTCCAAGAAAACGAGGAAATT	intergenic							238.384	85.0721	7.91039	6.21503	280.362	260.913	173.877	104.637	93.5457	42.114	99.9915	8.14396	8.04684	7.54038	6.46754	5.28722	6.60085	6.5045
ASHG19A3A022470	0.00140726	2.09134	up	noncoding	ENST00000399472	RP11-331G2.4	Ensembl	474	chr3	+	39255689	39256163	CGGAAGAGTATTGTTTGTTTGTTTGTTTTTGTGGGCACCAGAACTACCACCTCTGAAAAG	intergenic							2300.72	962.053	11.0441	9.97964	2219.68	2258.69	2423.78	856.876	968.576	1024.94	997.825	10.9725	11.0041	11.1555	9.98122	10.0917	9.8087	10.0369
ASHG19A3A030767	7.66968e-05	2.29686	up	noncoding	BC041951		NRED	2155	chr6	-	160100150	160102293	GAGGAAGCATTCTTTCCTTCACTAAGTTTGTCTTTCTTGTCTTCTGGATAGATTGATTTT	exon sense-overlapping	NM_001024466	SOD2	superoxide dismutase [Mn], mitochondrial isoform	-	160100148	160114353	25940.6	8833.88	14.4431	13.2435	26068.3	27181	24572.5	8303.82	8888.7	8818.9	9324.11	14.4204	14.5105	14.3984	13.2597	13.247	13.1608	13.3064
ASHG19A3A030767	7.66968e-05	2.29686	up	noncoding	BC041951		NRED	2155	chr6	-	160100150	160102293	GAGGAAGCATTCTTTCCTTCACTAAGTTTGTCTTTCTTGTCTTCTGGATAGATTGATTTT	exon sense-overlapping	NM_001024465	SOD2	superoxide dismutase [Mn], mitochondrial isoform	-	160100148	160114353	25940.6	8833.88	14.4431	13.2435	26068.3	27181	24572.5	8303.82	8888.7	8818.9	9324.11	14.4204	14.5105	14.3984	13.2597	13.247	13.1608	13.3064
ASHG19A3A054843	0.00475768	5.77804	up	noncoding	ENST00000457538	AC040169.3	Ensembl	1074	chr16	+	84152948	84154032	TATACCTTGTTAGTGGGCAAACCACCTTCTGAAACCTCTTGTCTAAGAGACCTACCTCTG	intergenic							58.5227	14.1346	6.0141	3.48352	64.1082	61.1534	50.3064	19.0331	5.55588	13.3866	18.563	6.12987	6.0762	5.83624	3.90887	3.5162	4.02775	2.48126
ASHG19A3A026009	3.39267e-05	4.78979	up	noncoding	uc003ifn.2	AK090904	UCSC_knowngene	2962	chr4	+	128758921	128761883	ATACTCATGTTTTCTAACAAAACAGCTTTGGATTTATAATGCTGCCAGATGTCATTACAA	intergenic							437.22	97.8843	8.76426	6.50429	463.946	416.459	431.255	106.696	85.0183	90.3493	109.473	8.83449	8.68568	8.77259	6.6101	6.41886	6.62838	6.35984
ASHG19A3A013450	6.8023e-05	3.95345	up	noncoding	ENST00000469016	RP11-373D23.1	Ensembl	106	chr2	-	28683122	28683228	TTATCACTGAAATTAAACGGTGGCAGACATGTCCAAGGAATGCTGCGAGGATTTATCCCT	intergenic							2883.24	645.955	11.3572	9.37406	2772.24	2890.82	2986.65	674.299	582.759	662.002	664.763	11.2777	11.341	11.4528	9.35685	9.43047	9.43884	9.27008
ASHG19A3A024341	8.91035e-05	2.18787	up	noncoding	AF086310		misc_RNA	578	chr4	-	76007137	76007705	GTATCAACTTAGCAAACCAAGTCCAAAACATTTTATATGTGTCTATCTTTCCTGCTGTTC	intergenic							10043	3800.07	13.1197	11.9902	10054.4	10140.4	9934.12	3990.25	3490.31	3687.98	4031.75	13.0958	13.1241	13.1392	12.0197	11.9599	12.0729	11.9083
ASHG19A3A010600	0.000114842	3.32136	up	noncoding	AK026199		misc_RNA	1625	chr18	+	33296333	33297940	ATTGACCTGGAAGGAGAGAAGATAGAGAGTGGAGGCTCTGAAGGAGACTCTTATTTTCTC	intergenic							72.9103	27.4179	6.32936	4.59758	71.9979	73.6454	73.0875	25.9678	24.9117	27.4887	31.3033	6.30337	6.33034	6.35437	4.72505	4.64443	4.505	4.51585
ASHG19A3A009535	0.00273695	4.58565	up	noncoding	L38936		misc_RNA	535	chr17	+	40750660	40751194	TTTCTATTTGTGTTAGTAATCGTGCTCTGGGAAGGGGAAATTGCCAACAGTCTGGCAAGC	intronic antisense	NM_178126	FAM134C	hypothetical protein LOC162427	-	40731525	40761445	58.5165	17.094	6.01929	3.82216	60.309	59.6396	55.6008	17.469	18.4687	10.5964	21.842	6.04121	6.04223	5.97443	4.16907	3.15536	3.89196	4.07227
ASHG19A3A045668	9.01196e-06	2.50131	up	noncoding	ENST00000492327	RP11-801G16.1	Ensembl	668	chr11	-	108561015	108561683	ATTTTCCTGGGGGCATCTCTCAAGAATGAGGTTTCAAAGATTACATGGCGCAAAAGTGGC	intronic antisense	NM_004398	DDX10	probable ATP-dependent RNA helicase DDX10	+	108535815	108811648	6582.96	2202.9	12.5256	11.203	6810.45	6187.31	6751.13	2212.93	2235.07	2122.13	2241.47	12.5456	12.4411	12.5902	11.1738	11.1587	11.2178	11.2616
ASHG19A3A007173	0.000122826	3.26368	up	noncoding	NR_004862	C2orf60	RefSeq_NR	5365	chr2	-	200793634	200820459	TGCTGCAGTTGCACAGATGGACTTCATTAAACTTTACCTTTTGACCAGTTGGTCCAGAGG	exon sense-overlapping	NM_001039693	TYW5	tRNA wybutosine-synthesizing protein 5	-	200793633	200820459	298.58	99.5007	8.24275	6.53625	316.768	306.82	272.152	89.1087	103.511	97.4369	107.946	8.31743	8.266	8.14483	6.59071	6.53212	6.36908	6.65311
ASHG19A3A007173	0.000122826	3.26368	up	noncoding	NR_004862	C2orf60	RefSeq_NR	5365	chr2	-	200793634	200820459	TGCTGCAGTTGCACAGATGGACTTCATTAAACTTTACCTTTTGACCAGTTGGTCCAGAGG	natural antisense	NM_024520	C2orf47	hypothetical protein LOC79568 precursor	+	200820039	200828847	298.58	99.5007	8.24275	6.53625	316.768	306.82	272.152	89.1087	103.511	97.4369	107.946	8.31743	8.266	8.14483	6.59071	6.53212	6.36908	6.65311
ASHG19A3A042708	0.000208203	2.39668	up	noncoding	ENST00000424552	RP11-671E7.1	Ensembl	345	chr10	-	46221141	46221486	ACACAGACAAGAACCTTACTATCCCGACCAATATGGACATTAAGGTTACAACCAGCTGCC	intergenic							2565.97	932.359	11.1959	9.93488	2481.49	2548.5	2667.91	888.462	927.661	979.292	934.021	11.1313	11.1675	11.289	9.87696	10.024	9.86481	9.97375
ASHG19A3A049944	0.000645385	2.6484	up	noncoding	ENST00000434567	RP11-40O20.4	Ensembl	254	chr13	+	23947561	23948155	ATTCTACACTACGATGAGGTGTCCATCATGGAGGTTAAGATCAATGCCCTCATTAAAGCA	intronic antisense	NM_014363	SACS	sacsin	-	23902964	24007841	7106.02	2233.21	12.6263	11.2212	6391.37	7097.96	7828.74	2331.63	2008.91	2363.2	2229.1	12.4584	12.621	12.7996	11.1669	11.321	11.2955	11.1015
ASHG19A3A047693	4.54908e-05	2.8737	up	noncoding	BC015876		misc_RNA	998	chr12	-	56700057	56701024	GCTCTTAACCTTGTAAATCTGATCAAGCTTCAGATGCCTTCTAACTTAGTTTATCAGTAA	intergenic							199.956	78.2911	7.70481	6.1819	208.066	187.989	203.814	81.0312	78.5633	75.6936	77.8764	7.75175	7.60865	7.75405	6.10058	6.15858	6.2258	6.24266
ASHG19A3A019738	0.000298709	13.3811	up	noncoding	ENST00000417397	RP4-569D19.5	Ensembl	1337	chr22	-	35897907	35899633	AATGGAAATGGTGAAGAAATTTGAGAACTGCGACCGGTATTCACATCTGCAAAGTGATCA	intergenic							180.548	17.0355	7.56751	3.82538	173.434	173.605	194.605	15.9797	14.8405	13.3652	23.9564	7.5044	7.50216	7.69596	4.31285	3.51288	3.75165	3.72415
ASHG19A3A014668	1.17497e-05	12.1999	up	noncoding	uc002ukq.2	BC034000	UCSC_knowngene	690	chr2	-	176999570	177001826	GACACAAGAAGCTTGGATGTGAAATAGCACTTCCTTCTGTGTTACAGAATAAAACAATAT	intergenic							2035.01	161.686	10.8705	7.2617	2114.26	2050.29	1940.48	164.07	157.307	141.088	184.28	10.9025	10.872	10.837	7.39812	7.08652	7.27556	7.2866
ASHG19A3A026068	5.23727e-06	3.56366	up	noncoding	ENST00000503502	RP11-308D13.1	Ensembl	385	chr4	+	140467504	140467889	AATTGGGTGACCATGTAACCAACTTATGCAAGATGGGGGCCCCCAAATCTGGTATCTTTT	intronic antisense	NM_030648	SETD7	histone-lysine N-methyltransferase SETD7	-	140427191	140477577	7893.37	1861.09	12.7755	10.9421	8242.3	6764.52	8673.29	1945.87	2000.53	1506.2	1991.77	12.8153	12.5604	12.9509	10.9975	10.6581	11.0192	11.0938
ASHG19A3A038612	0.000726676	2.46147	up	noncoding	ENST00000417418	RP11-216M21.6	Ensembl	308	chr9	+	42312409	42316345	CACACCTGTGTTTTCTATGAGTTCTCCAATATCAAGGAGATTTAACAGTTTGTTTGGTAA	intergenic							243.729	109.119	7.97059	6.67106	240.029	239.81	251.347	95.2736	106.668	112.4	122.133	7.94232	7.93849	8.03094	6.77971	6.74076	6.46534	6.69846
ASHG19A3L0000303	0.000617968	2.59283	up	noncoding	BU626341	lincRNA-RDX-2	lincRNA	692	chr11	+	110090981	110091622	CTATGTATCTAATGTGCTGTGAACTGATAAAACCTGGATCTAAACAGCCTCTGTAAAAAA	intergenic							90.1495	42.2769	6.62238	5.24785	90.4322	90.4683	89.5481	36.85	44.7306	39.0767	48.4505	6.61378	6.61577	6.63758	5.38654	5.17565	5.03021	5.399
ASHG19A3A030486	0.000217779	2.49536	up	noncoding	ENST00000440334	RP11-527F13.2	Ensembl	420	chr6	-	126579066	126579486	TGCTGGTTGACTGTTACAAACCCACCGAGGCCTTCATCCCTGACCTGCTGGACAAGATCC	intergenic							20548.1	6566.98	14.1204	12.8011	21198.6	20151.1	20294.7	5857.06	6848.59	6776.17	6786.13	14.1264	14.0972	14.1376	12.7928	12.8593	12.6442	12.9082
ASHG19A3A049761	0.000106798	3.52674	up	noncoding	ENST00000446770	RP11-383H17.3	Ensembl	267	chr13	-	98639203	98639470	TGACTTCTTGGAGAGCCACTTCCTAGATGAGGAAGTGAAACTCATTAAGATGGGTGACCA	intronic antisense	NM_002271	IPO5	importin-5	+	98605928	98676550	289.575	90.0897	8.20281	6.38447	285.209	290.106	293.41	99.9661	90.6562	89.7136	80.0229	8.16862	8.18794	8.25186	6.14397	6.40878	6.53212	6.45302
ASHG19A3A028512	3.46847e-05	21.2303	up	noncoding	CR624187		RNAdb	2237	chr5	+	90664552	90666786	AGTAGACAATTCTGAGCATGTGCATACGCAGGTAAAGTCCAGGCTATATTAAATAAAAAA	natural antisense	NM_020801	ARRDC3	arrestin domain-containing protein 3	-	90664540	90679149	1837.15	85.7658	10.7198	6.31176	1945.28	1912.74	1653.43	79.6391	96.0116	77.5082	89.9044	10.7839	10.766	10.6095	6.31182	6.19361	6.19853	6.54307
ASHG19A3A018677	0.000245767	2.19212	up	noncoding	ENST00000400115	PPIAP	Ensembl	501	chr21	-	22200444	22200952	TTTGATGATGAGAACTTCGTCCTAAATTATACAGGTCCTGGCATCTTGTCCGTGGAGAAT	intergenic							39512.8	14011	15.0573	13.925	39965.8	40408.8	38163.8	14964.9	13634.3	14291.4	13153.3	15.0403	15.0865	15.0452	13.769	13.9622	14.0395	13.9291
ASHG19A3A024184	7.47666e-05	4.81926	up	noncoding	ENST00000508433	RP11-89B16.2	Ensembl	640	chr4	-	54793665	54794305	ATTCTGATTTCCTAACTTCAATGAGCCAAACTCAGAGTATAGCAACCAGCAGGCGCCCAA	intergenic							57.7941	15.7049	6.00266	3.73385	61.1924	52.7076	59.4821	17.0815	14.1602	15.6168	15.9612	6.06165	5.87867	6.06766	3.66691	3.76641	3.85573	3.64634
CUST_4_PI426075208	0.00963966	41.479	up	noncoding	nc-HOXA11-86+	nc-HOXA11-86	HOX cluster	128	chr7	+	27228787	27228915	CGCTTCTTTCCACAGCCTTTGCAGGCGGAATATCGGAATAAAGTGGGTCCAGGCGCCTCT	intergenic							861.346	37.6263	9.67624	4.30194	869.719	835.671	878.646	25.9353	14.8879	104.673	5.00918	9.66536	9.62321	9.74016	2.33662	6.63894	4.50356	3.72861
ASHG19A3A030059	0.0013042	3.10766	up	noncoding	ENST00000425089	RP11-524H19.2	Ensembl	586	chr6	-	54704915	54705653	AAATGTTACGATGATTGAGGGCTGTACTGGTATTTGGTGGGCAGGGAATGACAATGTCCT	intergenic							116.697	45.3417	6.97338	5.33755	113.773	118.278	118.04	57.9829	41.0796	35.1831	47.121	6.92945	6.97843	7.01225	5.34763	5.01636	5.71296	5.27327
ASHG19A3A044180	0.00219913	2.36362	up	noncoding	ENST00000453174	MBL1P1	Ensembl	818	chr10	+	81664653	81691557	CTTTGATATAATGCCTCATTCAGAACTTCATTGGCAGAAGTTGACTGAGATCAGAGGCCC	intergenic							75.7296	39.8692	6.37428	5.13328	84.444	65.2723	77.4727	50.7984	37.1819	27.4952	44.0013	6.52275	6.1668	6.43329	5.2438	4.64461	5.5224	5.12232
ASHG19A3A036526	7.34912e-05	6.39098	up	noncoding	uc003xjb.2	BC034319	UCSC_knowngene	837	chr8	+	32785487	32902372	CTGCAGGTTAAGAGAAATTGAGAAACGATGGAGAATTTAAGTGTTTTAGATCCTACATAC	intergenic							1213.55	184.453	10.1395	7.4635	1196.21	1211.77	1232.68	177.11	161.369	193.487	205.845	10.0959	10.1245	10.1982	7.57048	7.56418	7.39287	7.3265
ASHG19A3A025718	0.000162258	7.30029	up	noncoding	uc003hlf.2	AK130099	UCSC_knowngene	2778	chr4	+	79567337	79604337	AAAGGCATCCGAATGGTCTAAGTAATGCCATCCATCTGTCAGTAATAGATTCAGAAATGG	intergenic							268.564	42.095	8.09945	5.2315	269.418	270.958	265.316	36.0256	40.0404	38.2646	54.0496	8.09076	8.09866	8.10894	5.55199	5.14372	4.99951	5.23076
ASHG19A3A015413	0.000204905	8.70818	up	noncoding	ENST00000398372	AC011742.4	Ensembl	1216	chr2	+	26372072	26373600	ACACGAACCTTGCTTACATAAATGCTGCAAAAAGTCATGCAGAAGCTGCTTTAGAGGAAG	intergenic							360.359	46.618	8.50809	5.38572	358.808	355.148	367.123	42.6379	37.2575	52.4019	54.1746	8.49082	8.46833	8.56511	5.55518	5.61298	5.24898	5.12573
ASHG19A3A038709	0.000515294	2.59564	up	noncoding	uc004aes.1	DQ594366	UCSC_knowngene	2483	chr9	+	67792166	67794649	GGTCTCAAGGCCTACTTGTACTGTTGTACATAATGTATATAATTGACTTTTATTCACTCG	intergenic							75.0448	35.3763	6.36219	4.9861	68.0948	82.2452	74.7944	32.3015	38.3367	34.1826	36.6844	6.22045	6.48118	6.38494	4.96796	4.97295	4.83591	5.16759
ASHG19A3A032322	0.00242607	2.14259	up	noncoding	BC071615		misc_RNA	1707	chr6	+	166796676	166798302	TCCAAGTTGTTTCGTTTCGTTTTGTTTCTAATGTGGACGATCATTTAAAATGCCTCTGGT	bidirectional	NM_016098	BRP44L	brain protein 44-like protein	-	166778407	166796486	47.4789	27.9878	5.73086	4.6315	55.1993	44.4468	42.7907	28.8219	26.0644	29.4342	27.6307	5.92309	5.65172	5.61777	4.52614	4.74968	4.66686	4.58334
ASHG19A3A043831	0.0196012	5.17213	up	noncoding	ENST00000432557	RP11-291L22.4	Ensembl	863	chr10	+	38742265	38764837	AAGAAGAATCTGAAGTGAAATGATATCAAGAGACCTATCAAGACCTGTATCCAGGAAAAG	intergenic							132.747	23.0487	6.69862	4.32786	53.5864	57.3052	287.348	27.9145	20.9747	19.6614	23.6443	5.8813	5.99074	8.2238	4.29242	4.13624	4.6158	4.26697
ASHG19A3A042760	0.00234582	2.00732	up	noncoding	ENST00000434320	RP11-534L6.3	Ensembl	584	chr10	-	49953589	49954173	AAACAGGCCAAAAAGAACGTGGAGAAGAAAACTGACAAATACACAGAGGCCCTCAAGACC	intronic antisense	NM_020945	WDFY4	WD repeat- and FYVE domain-containing protein 4	+	49893517	50191001	14835.9	5962.89	13.6547	12.6494	15158.2	12982.5	16366.9	6839.52	6461.77	5674.32	4875.96	13.6657	13.4667	13.8316	12.3042	12.6029	12.8726	12.818
ASHG19A3A041615	0.000215991	2.96757	up	noncoding	NR_028597	SRD5A1P1	RefSeq_NR	2155	chrX	+	138528977	138531132	GTCTTCTAGTCTAGACCTAGTCTTTTGTTCTGTTCCCCAGGTATGGATATACTAGAGATT	intergenic							5864.56	1685.65	12.3732	10.804	5841.79	6044.49	5707.4	1767.39	1632.4	1484.4	1858.4	12.3426	12.409	12.3681	10.8945	10.6363	10.882	10.803
ASHG19A3A052892	0.000595057	2.94705	up	noncoding	NR_027642	LOC100132724	RefSeq_NR	2445	chr15	+	51236325	51238760	GCTCCTTTTAGCTACCCTGAAAAATGCCTAGTTGATAAAGACTATCTAACTATTTTATCC	intron sense-overlapping	NM_007347	AP4E1	AP-4 complex subunit epsilon-1	+	51200945	51298097	675.133	228.568	9.34529	7.78602	694.656	680.475	650.267	237.209	243.878	184.564	248.621	9.37014	9.33876	9.32697	7.85957	7.49512	7.83583	7.95356
ASHG19A3A035047	2.19471e-05	2.06485	up	noncoding	ENST00000491343	RP11-128A6.1	Ensembl	752	chr7	+	128696072	128696824	CTCATGAGTGGTGTTTCCCTCAAGCCCGAATTCGTAGACATCATCAATGCCAAACAATGA	bidirectional	NM_012470	TNPO3	transportin-3 isoform 1	-	128594233	128695227	20520.5	7904.75	14.12	13.0739	20438.7	20455.7	20667.1	8234.08	7465.12	7884.66	8035.14	14.0827	14.1133	14.1638	13.0351	13.077	13.143	13.0406
ASHG19A3A035047	2.19471e-05	2.06485	up	noncoding	ENST00000491343	RP11-128A6.1	Ensembl	752	chr7	+	128696072	128696824	CTCATGAGTGGTGTTTCCCTCAAGCCCGAATTCGTAGACATCATCAATGCCAAACAATGA	bidirectional	NM_001191028	TNPO3	transportin-3 isoform 2	-	128594233	128695227	20520.5	7904.75	14.12	13.0739	20438.7	20455.7	20667.1	8234.08	7465.12	7884.66	8035.14	14.0827	14.1133	14.1638	13.0351	13.077	13.143	13.0406
ASHG19A3A018441	0.000306045	2.24373	up	noncoding	ENST00000444980	COX6CP2	Ensembl	225	chr20	+	49096303	49096528	CAGAAATTATGATTCCATAAAAGATTTTGAGATGAGGAAGGCTGGTATCTTTCAGAGTAC	intergenic							15848.1	5657.62	13.7532	12.5873	15541.6	15746.5	16256.2	5195.49	5633.03	5924.64	5877.33	13.7023	13.7324	13.8248	12.5779	12.6679	12.4754	12.6278
ASHG19A3A036785	0.00320534	2.75968	up	noncoding	ENST00000491662	KB-1589B1.1	Ensembl	432	chr8	+	98877281	98877713	CTTGAACCTTATTGTGGAAAACCATAAAGCTCTGGTTGCTGGATTTGGTCAAAAAGGTCA	intergenic							5892.74	1817.68	12.3703	10.9058	6502.58	5543.32	5632.32	1980.16	1748.24	2078.67	1463.63	12.4838	12.2814	12.3458	10.5556	11.1262	11.0458	10.8957
ASHG19A3A027331	0.000359148	2.08072	up	noncoding	ENST00000395355	RP11-772E11.1	Ensembl	321	chr5	-	125999019	125999342	AAAGAAGAAATCAAAGAGATGCATGGATTGCGGATATCTACCTCTGTCCCCAAACTCTGA	intergenic							12290.7	4818.68	13.4003	12.3432	12762.1	12574.2	11535.9	5106.87	4473.99	4954.2	4739.68	13.4296	13.4284	13.3429	12.2606	12.3903	12.45	12.2719
ASHG19A3A040682	4.67846e-05	3.91321	up	noncoding	ENST00000457574	GS1-324M7.3	Ensembl	686	chrX	+	12843958	12844952	ACAATGAGGTCTCTTGGTTGTATGATTTTCATTGGTATAGATGAAGAACAAGGCCCTCAG	intergenic							3096.09	695.206	11.4582	9.48988	3394.2	2949.15	2944.91	712.461	651.688	703.56	713.114	11.5689	11.3758	11.4301	9.46881	9.52773	9.52044	9.44254
ASHG19A3A036886	0.00263381	3.12946	up	noncoding	ENST00000442838	AC016405.1	Ensembl	929	chr8	+	123781512	123782441	TCCTGAGATTGTAAAGTCATTTCTCTTCCAGCTGCTAAAAGGCCTCGGATTCTGTCACAG	intergenic							446.386	148.027	8.77272	7.12681	442.132	542.939	354.086	174.701	132.746	149.35	135.311	8.77631	9.03023	8.51162	6.93301	7.17446	7.36948	7.03029
ASHG19A3A023222	0.00195088	2.5366	up	noncoding	ENST00000468439	RP11-65E22.2	Ensembl	2247	chr3	+	132105365	132107918	GGAACAGTTACTCATAGGCTGTTGAAGATGGTAAATCTACAACAACAATGGAAGATATTA	intergenic							1005.24	372.92	9.87354	8.53065	947.749	1212.96	855.028	395.226	370.143	357.164	369.147	9.78927	10.1273	9.70404	8.45316	8.48414	8.61557	8.56971
ASHG19A3A039342	0.00189795	12.1685	up	noncoding	ENST00000423330	RP11-57C19.2	Ensembl	585	chr9	+	133527185	133527770	CAGACCAAGAAGGAAGAGATCATCAAGACTTTGTCCCAGGAGGAAAAGGCCAAGAAATAA	intergenic							860.782	81.1696	9.6725	6.06743	864.927	813.541	903.878	155.524	60.0221	50.9223	58.2097	9.65823	9.5821	9.77718	5.66314	5.56959	7.19229	5.84468
ASHG19A3A038726	2.11959e-05	4.47799	up	noncoding	ENST00000446871	RP11-793G16.2	Ensembl	520	chr9	+	69477880	69478916	TTCTGAGGGACGGCAATTCTGAAGACATTGAATGGTGGGTGCTGGGCCTCATGGCTGTTC	intergenic							445.595	106.159	8.79132	6.62847	446.74	427.474	462.569	120.453	99.1833	97.6821	107.317	8.79001	8.71942	8.86454	6.58213	6.53619	6.80892	6.58665
ASHG19A3A045426	0.000403623	2.03706	up	noncoding	NR_024249	LOC645332	RefSeq_NR	1859	chr11	-	67559239	67572807	TTAGAAGCAAAGTTAAGAGACTCATCAGATTCTGAGCTGCTGCGGGATATTTTGCAGAAG	intergenic							594.239	288.001	9.17116	8.14468	608.388	585.281	589.049	321.914	253.189	277.385	299.518	9.19558	9.13195	9.18597	8.14266	8.11634	8.30235	8.01736
ASHG19A3A018219	0.000487671	14.2967	up	noncoding	ENST00000417727	SOCS2P1	Ensembl	557	chr20	+	31775196	31776098	AAGTATGGTTTCATCTGATTGACTGCTATGTTCAGATGTGTAAGGATGAGCAGACGGGTG	intergenic							132.607	12.2734	7.14901	3.3114	126.185	130.106	141.53	13.367	9.54016	16.7795	9.4068	7.07134	7.11184	7.26386	2.85274	3.88602	3.46065	3.0462
ASHG19A3A021522	0.00107382	4.03034	up	noncoding	ENST00000506660	RP11-71E19.5	Ensembl	986	chr3	-	126111874	126113694	GCGGGCCGCGGGACAGGGAGGGCGCGGGGCCGGGCTGCTGGGTCCGAGCTCTGGGCACGA	bidirectional	NM_182628	CCDC37	coiled-coil domain-containing protein 37	+	126113781	126155398	216.908	61.6855	7.8142	5.80329	207.432	233.193	210.098	45.6887	72.5806	64.2487	64.2242	7.74666	7.9002	7.79572	5.81308	5.92014	5.35749	6.12246
ASHG19A3A027137	7.16659e-05	2.89115	up	noncoding	ENST00000514941	AC008592.3	Ensembl	418	chr5	-	95170127	95170750	CACAGTATAAAAAGATTATTTGCATGGGTGCAAAAATAAAAATGGTTTGCCGCTGGAGTA	intergenic							4009.58	1187.3	11.8274	10.2958	4182.33	4104.03	3742.37	1165.14	1208.09	1204.09	1171.88	11.8664	11.8469	11.7689	10.2204	10.333	10.2722	10.3574
ASHG19A3A012183	2.18744e-05	5.14349	up	noncoding	uc002mlv.2	AK097685	UCSC_knowngene	1670	chr19	+	9732180	9745397	GACAAAATGAGTTGCTCTACAAAGGTCCAACTTCGTTGTCCTTTGTTCTGTAACCTTTGT	bidirectional	NM_152289	ZNF561	zinc finger protein 561	-	9718001	9731916	1107.71	208.065	10.0125	7.64972	1132.88	1091.41	1098.83	205.158	212.363	212.414	202.323	10.024	9.97248	10.0409	7.54337	7.70703	7.61119	7.73729
ASHG19A3A007690	6.73686e-07	4.82541	up	noncoding	NR_029415	SHMT2	RefSeq_NR	2097	chr12	+	57624110	57628717	ATCTTCTTCGAGTCTATGCCCTATAAGCTCAACGGCTTTAGCTGTTTGTGTGTCTGTCCA	natural antisense	NM_020142	NDUFA4L2	NADH dehydrogenase [ubiquinone] 1 alpha	-	57628685	57634475	1408.9	274.336	10.3462	8.07559	1418.4	1428.15	1380.13	275.281	272.778	270.581	278.704	10.3328	10.3462	10.3597	8.03392	8.07773	8.06392	8.12679
ASHG19A3A007690	6.73686e-07	4.82541	up	noncoding	NR_029415	SHMT2	RefSeq_NR	2097	chr12	+	57624110	57628717	ATCTTCTTCGAGTCTATGCCCTATAAGCTCAACGGCTTTAGCTGTTTGTGTGTCTGTCCA	exon sense-overlapping	NM_005412	SHMT2	serine hydroxymethyltransferase, mitochondrial	+	57623355	57628718	1408.9	274.336	10.3462	8.07559	1418.4	1428.15	1380.13	275.281	272.778	270.581	278.704	10.3328	10.3462	10.3597	8.03392	8.07773	8.06392	8.12679
ASHG19A3A007690	6.73686e-07	4.82541	up	noncoding	NR_029415	SHMT2	RefSeq_NR	2097	chr12	+	57624110	57628717	ATCTTCTTCGAGTCTATGCCCTATAAGCTCAACGGCTTTAGCTGTTTGTGTGTCTGTCCA	exon sense-overlapping	NM_001166359	SHMT2	serine hydroxymethyltransferase, mitochondrial	+	57624110	57628718	1408.9	274.336	10.3462	8.07559	1418.4	1428.15	1380.13	275.281	272.778	270.581	278.704	10.3328	10.3462	10.3597	8.03392	8.07773	8.06392	8.12679
ASHG19A3A007690	6.73686e-07	4.82541	up	noncoding	NR_029415	SHMT2	RefSeq_NR	2097	chr12	+	57624110	57628717	ATCTTCTTCGAGTCTATGCCCTATAAGCTCAACGGCTTTAGCTGTTTGTGTGTCTGTCCA	exon sense-overlapping	NM_001166357	SHMT2	serine hydroxymethyltransferase, mitochondrial	+	57624142	57628718	1408.9	274.336	10.3462	8.07559	1418.4	1428.15	1380.13	275.281	272.778	270.581	278.704	10.3328	10.3462	10.3597	8.03392	8.07773	8.06392	8.12679
ASHG19A3A007690	6.73686e-07	4.82541	up	noncoding	NR_029415	SHMT2	RefSeq_NR	2097	chr12	+	57624110	57628717	ATCTTCTTCGAGTCTATGCCCTATAAGCTCAACGGCTTTAGCTGTTTGTGTGTCTGTCCA	exon sense-overlapping	NM_001166358	SHMT2	serine hydroxymethyltransferase, mitochondrial	+	57623827	57628718	1408.9	274.336	10.3462	8.07559	1418.4	1428.15	1380.13	275.281	272.778	270.581	278.704	10.3328	10.3462	10.3597	8.03392	8.07773	8.06392	8.12679
ASHG19A3A007690	6.73686e-07	4.82541	up	noncoding	NR_029415	SHMT2	RefSeq_NR	2097	chr12	+	57624110	57628717	ATCTTCTTCGAGTCTATGCCCTATAAGCTCAACGGCTTTAGCTGTTTGTGTGTCTGTCCA	exon sense-overlapping	NM_001166356	SHMT2	serine hydroxymethyltransferase, mitochondrial	+	57623355	57628718	1408.9	274.336	10.3462	8.07559	1418.4	1428.15	1380.13	275.281	272.778	270.581	278.704	10.3328	10.3462	10.3597	8.03392	8.07773	8.06392	8.12679
ASHG19A3A019919	0.0150681	3.5471	up	noncoding	AB051448		NRED	6475	chr22	-	45373647	45476304	TTTTTGTTTCTTCCAGACGAATACCAACACTGAAGGAGAATGATGACGGTGTTGGGGGCT	intron sense-overlapping	NM_138415	PHF21B	PHD finger protein 21B isoform 1	-	45277042	45405581	38.4147	15.666	5.44211	3.61547	36.0131	41.9248	37.3063	14.8068	12.2716	9.22538	26.3603	5.32676	5.57375	5.42582	4.45727	2.9607	3.63023	3.41369
ASHG19A3A019919	0.0150681	3.5471	up	noncoding	AB051448		NRED	6475	chr22	-	45373647	45476304	TTTTTGTTTCTTCCAGACGAATACCAACACTGAAGGAGAATGATGACGGTGTTGGGGGCT	intron sense-overlapping	NM_001135862	PHF21B	PHD finger protein 21B isoform 2	-	45277042	45405809	38.4147	15.666	5.44211	3.61547	36.0131	41.9248	37.3063	14.8068	12.2716	9.22538	26.3603	5.32676	5.57375	5.42582	4.45727	2.9607	3.63023	3.41369
ASHG19A3A026708	0.0160409	3.33669	up	noncoding	ENST00000513087	CTD-2108O9.4	Ensembl	269	chr5	-	38429993	38430262	AGGTCAAGTTTGAAGAGAGGAACAGATGGGCAAGAACAAGTGGTTCTTTGAGAAGCTGCA	intronic antisense	NM_001205301	EGFLAM	pikachurin isoform 5 precursor	+	38258510	38465582	27173.5	7029.74	14.5151	12.7767	27992	25645.7	27882.9	8293.76	8412.24	2850.08	8562.87	14.5259	14.4196	14.5999	13.1426	11.589	13.1584	13.2169
ASHG19A3A026708	0.0160409	3.33669	up	noncoding	ENST00000513087	CTD-2108O9.4	Ensembl	269	chr5	-	38429993	38430262	AGGTCAAGTTTGAAGAGAGGAACAGATGGGCAAGAACAAGTGGTTCTTTGAGAAGCTGCA	intronic antisense	NM_152403	EGFLAM	pikachurin isoform 1 precursor	+	38258510	38465582	27173.5	7029.74	14.5151	12.7767	27992	25645.7	27882.9	8293.76	8412.24	2850.08	8562.87	14.5259	14.4196	14.5999	13.1426	11.589	13.1584	13.2169
ASHG19A3A026708	0.0160409	3.33669	up	noncoding	ENST00000513087	CTD-2108O9.4	Ensembl	269	chr5	-	38429993	38430262	AGGTCAAGTTTGAAGAGAGGAACAGATGGGCAAGAACAAGTGGTTCTTTGAGAAGCTGCA	intronic antisense	NM_182798	EGFLAM	pikachurin isoform 2	+	38403633	38465582	27173.5	7029.74	14.5151	12.7767	27992	25645.7	27882.9	8293.76	8412.24	2850.08	8562.87	14.5259	14.4196	14.5999	13.1426	11.589	13.1584	13.2169
ASHG19A3A027030	0.000154961	4.23145	up	noncoding	ENST00000506122	RP11-241J12.3	Ensembl	481	chr5	-	80042157	80042638	AATATCAAAAATGACTTTACTGAAGAAGAGGAAACCCAGGTATGCCAAGCGAACCAGCGG	intronic antisense	NM_002439	MSH3	DNA mismatch repair protein Msh3	+	79950293	80172634	168.021	46.412	7.46499	5.38384	175.964	143.899	184.201	43.8892	46.7848	38.3823	56.5915	7.52331	7.24871	7.62296	5.62284	5.14845	5.29707	5.467
ASHG19A3A010185	0.00112021	3.51188	up	noncoding	ENST00000508721	AP005901.1	Ensembl	1181	chr18	-	15307661	15330281	GGCAGGAGTAACATCTAATAAAATTGAAGTTTTGGAAGAAGGAACATCTAAGATGATCAC	intergenic							33.3568	13.1209	5.24049	3.42825	40.0936	30.715	29.2618	11.5664	10.2228	15.9744	14.7198	5.47053	5.15799	5.09296	3.52924	3.80592	3.2374	3.14045
ASHG19A3A030779	0.000114685	6.16107	up	noncoding	ENST00000283110	RP11-363I22.3	Ensembl	373	chr1	+	150752747	150753120	CATATAGAAAATCTCATGTCAGCTTCTGGTGTTTTTCAAACAACTGACACCGAAAGCAAA	intergenic							1501.09	230.006	10.4201	7.79697	1611.97	1662.37	1228.93	218.915	223.749	215.71	261.651	10.5116	10.5556	10.1933	7.93563	7.72803	7.70913	7.81508
ASHG19A3A050483	9.20882e-05	21.0963	up	noncoding	AF131777		NRED	1995	chr13	+	111552426	111554396	TTAACAACCGGAAAATAGCCAAGACCAGACAAGTCTGCTGTGGGGACAATTAGATAAAAG	intronic antisense	NM_017664	ANKRD10	ankyrin repeat domain-containing protein 10	-	111530886	111567416	625.419	32.365	9.23658	4.83766	659.031	639.069	578.157	40.0656	31.9875	27.3652	30.0419	9.29918	9.25147	9.15909	4.66037	4.63774	5.1567	4.89584
ASHG19A3A053507	3.03041e-05	3.92826	up	noncoding	uc010uzi.1	BC008178	UCSC_knowngene	335	chr16	-	14819973	14859302	TTGAGATTATCATCCGCTGAGGGTAGAGCTGAGGGTGGAAGGGGAGTGAGCAGACACTCG	intergenic							144.66	43.5143	7.26161	5.28772	147.889	128.736	157.354	45.7746	44.2852	34.7581	49.2391	7.28367	7.09735	7.4038	5.40948	4.99674	5.36091	5.38374
ASHG19A3A035978	0.00343534	2.23065	up	noncoding	AF088009		misc_RNA	468	chr8	-	98253974	98254432	AAAGAGACAACTGTGGCCTGAAAAGCAACATTAATAAAAGCACTGCTTCTTTTTAATCAC	intergenic							49.7323	27.7462	5.74478	4.58732	39.3743	69.3346	40.488	29.5792	19.2621	34.9569	27.1866	5.44564	6.24902	5.53969	4.50163	5.00555	4.70249	4.1396
ASHG19A3A019701	2.41994e-05	4.92594	up	noncoding	ENST00000444403	RP11-247I13.5	Ensembl	394	chr22	-	31917184	31917578	GTCATTCCACACATTCGCAAGTCTCTGATTGGGAAGAAAGAACAACAGAAGACTATGTAA	intronic antisense	NM_001007467	SFI1	protein SFI1 homolog isoform a	+	31892260	32014534	31584.5	5122.97	14.735	12.4346	30842.3	31571.1	32339.9	5333.82	4715.69	5248.32	5194.04	14.6579	14.7314	14.8158	12.3963	12.4845	12.5132	12.3445
ASHG19A3A019701	2.41994e-05	4.92594	up	noncoding	ENST00000444403	RP11-247I13.5	Ensembl	394	chr22	-	31917184	31917578	GTCATTCCACACATTCGCAAGTCTCTGATTGGGAAGAAAGAACAACAGAAGACTATGTAA	intronic antisense	NM_014775	SFI1	protein SFI1 homolog isoform b	+	31892260	32014534	31584.5	5122.97	14.735	12.4346	30842.3	31571.1	32339.9	5333.82	4715.69	5248.32	5194.04	14.6579	14.7314	14.8158	12.3963	12.4845	12.5132	12.3445
ASHG19A3A010082	0.000403509	2.01629	up	noncoding	AK129602		misc_RNA	1193	chr17	+	80251591	80252784	CCGCCAAAACAGCGTGCATACCACTAGCATATGATTTTTGTAGTTTTTTAATGTTAAGTT	intergenic							493.534	247.258	8.92262	7.91091	494.229	496.298	490.075	263.502	214.326	248.26	262.943	8.91043	8.91613	8.94129	7.94355	7.94767	8.00026	7.75217
ASHG19A3A041110	0.00221958	3.69013	up	noncoding	ENST00000441055	RP6-22P16.1	Ensembl	1948	chrX	+	66593414	66595362	GCTCACACCTTACTGCACAGGAGATCATTTGTGCTTGAAAAAATCTTTACAAATATAAAG	intergenic							707.24	195.089	9.40289	7.51922	756.826	715.19	649.703	207.11	212.864	131.709	228.675	9.47647	9.40708	9.32513	7.72606	6.98521	7.62473	7.74091
ASHG19A3A052309	2.68905e-05	2.37474	up	noncoding	uc002aqr.1	BC047537	UCSC_knowngene	3969	chr15	-	67697735	67814182	GAGCGCCGTGAAGAAGCGGTTCTGCCGGGCCAGGTCCTGCCAGGGAGCCTTGGAGCAGTG	natural antisense	NM_001031715	IQCH	IQ domain-containing protein H isoform 1	+	67547137	67794142	240.663	111.465	7.95227	6.7045	244.633	232.984	244.373	113.848	106.495	111.215	114.302	7.9648	7.89932	7.99268	6.67543	6.72696	6.72022	6.69539
ASHG19A3A052309	2.68905e-05	2.37474	up	noncoding	uc002aqr.1	BC047537	UCSC_knowngene	3969	chr15	-	67697735	67814182	GAGCGCCGTGAAGAAGCGGTTCTGCCGGGCCAGGTCCTGCCAGGGAGCCTTGGAGCAGTG	natural antisense	NM_001143936	C15orf61	hypothetical protein LOC145853 precursor	+	67813521	67819641	240.663	111.465	7.95227	6.7045	244.633	232.984	244.373	113.848	106.495	111.215	114.302	7.9648	7.89932	7.99268	6.67543	6.72696	6.72022	6.69539
ASHG19A3A037090	0.000375126	2.44224	up	noncoding	ENST00000415892	RP11-12D24.6	Ensembl	214	chr9	-	5356311	5356525	ATCTGTGTGGATTATCTAAGGCCCCTAGAGAACATGGGAAAGAAGAAGTACTGGGAGGAA	intergenic							90.599	44.6332	6.62559	5.33738	100.957	88.21	82.63	45.7693	43.7334	42.9993	46.0309	6.77181	6.57731	6.52765	5.30817	5.31713	5.3604	5.36383
ASHG19A3A055279	0.00335769	2.29161	up	noncoding	uc010fjq.2	LIMS3	UCSC_knowngene	2071	chr2	+	110656008	110726122	TTTGAAACTCACCTCAGGCCATCAGCTGCATACTTTGGCAGACTGGTACATTTTGCAAAA	exon sense-overlapping	NM_001205288	LIMS3L	LIM and senescent cell antigen-like-containing	+	110656008	110664033	245.052	119.943	7.96811	6.77175	276.898	223.453	234.805	104.531	92.7087	108.264	174.267	8.12534	7.84175	7.93722	7.3115	6.68844	6.5979	6.48915
ASHG19A3A055279	0.00335769	2.29161	up	noncoding	uc010fjq.2	LIMS3	UCSC_knowngene	2071	chr2	+	110656008	110726122	TTTGAAACTCACCTCAGGCCATCAGCTGCATACTTTGGCAGACTGGTACATTTTGCAAAA	exon sense-overlapping	NM_033514	LIMS3	LIM and senescent cell antigen-like-containing	+	110656008	110664033	245.052	119.943	7.96811	6.77175	276.898	223.453	234.805	104.531	92.7087	108.264	174.267	8.12534	7.84175	7.93722	7.3115	6.68844	6.5979	6.48915
ASHG19A3A030170	4.83152e-05	6.90777	up	noncoding	BX537762		NRED	3332	chr6	-	79645584	79648898	GCTTTTTAAAATTTTATCCTTTGTGACCTGCTATAGTGGCATTGGACTATTTTCTGCATG	exon sense-overlapping	NM_017934	PHIP	PH-interacting protein	-	79644135	79788011	416.318	65.8072	8.7011	5.91288	412.101	422.461	414.391	64.5014	61.9528	58.4978	78.2766	8.67549	8.70361	8.72421	6.1073	5.7749	5.87476	5.89457
ASHG19A3A007329	0.000793012	4.70566	up	noncoding	NR_024526	ARL6IP6	RefSeq_NR	1788	chr2	+	153574422	153617767	GAGGGTTCGATCTCCGTACGCACCAGAGTTGCATGCTGAGAATTTGAAAAATGAAGATGA	bidirectional	NM_017892	PRPF40A	pre-mRNA-processing factor 40 homolog A	-	153508106	153573975	56.7845	16.1342	5.97918	3.74478	61.6203	51.8426	56.8905	12.5647	18.4423	13.3616	20.1683	6.07179	5.85796	6.0078	4.03683	3.51167	3.36191	4.06873
ASHG19A3A007329	0.000793012	4.70566	up	noncoding	NR_024526	ARL6IP6	RefSeq_NR	1788	chr2	+	153574422	153617767	GAGGGTTCGATCTCCGTACGCACCAGAGTTGCATGCTGAGAATTTGAAAAATGAAGATGA	exon sense-overlapping	NM_152522	ARL6IP6	ADP-ribosylation factor-like protein	+	153574422	153617767	56.7845	16.1342	5.97918	3.74478	61.6203	51.8426	56.8905	12.5647	18.4423	13.3616	20.1683	6.07179	5.85796	6.0078	4.03683	3.51167	3.36191	4.06873
ASHG19A3A040065	0.00790241	2.82262	up	noncoding	ENST00000458170	RP11-69A21.2	Ensembl	451	chrX	-	72027258	72028044	TGAAGTCCTGTTGGTCCCTACCGGCACATCACACACTCCTGGAAGCATGATCTTCACTCC	intergenic							564.992	207.497	9.10062	7.60359	596.592	521.191	577.191	132.737	211.868	229.497	255.885	9.16624	8.9787	9.15693	7.90571	7.82316	6.95113	7.73436
ASHG19A3A029788	0.00124527	2.26146	up	noncoding	ENST00000447689	LYPLA2P1	Ensembl	696	chr6	-	33333324	33334020	ATTGAGCATGAAATGAAGAACGGGATCCCTGCCAATCAAATCATCCTGGGAGGCTTTTCA	intergenic							114.578	59.6749	6.94737	5.77011	110.702	108.314	124.716	54.969	58.0338	58.4047	67.2919	6.89265	6.85891	7.09054	5.88039	5.77224	5.63379	5.79404
ASHG19A3A010809	5.05924e-05	6.50878	up	noncoding	ENST00000438304	RP11-354K1.3	Ensembl	1089	chr1	-	211833530	211834619	AGTATGAGGATGACAGTTACAGCCACAGCCACATTATGGGTCTCATTGAACAGTATGCAA	intron sense-overlapping	NM_001204182	NEK2	serine/threonine-protein kinase Nek2 isoform 3	-	211831598	211848972	2388.49	341.139	11.0959	8.39352	2365.21	2410.97	2389.3	312.242	314.324	371.094	366.896	11.0596	11.0946	11.1335	8.44494	8.54386	8.25602	8.32927
ASHG19A3A052289	4.26838e-05	2.56143	up	noncoding	ENST00000447781	AL591704.5	Ensembl	827	chr1	-	153352324	153353440	TTTATGTTACCAGCAATGACACTAAGGTGCTCCTACCCCGGTATGATGATACCACTGTGA	intergenic							2247.95	775.657	11.0098	9.65289	2272.49	2323.54	2147.82	797.642	737.913	806.985	760.089	11.0091	11.0423	10.9782	9.56083	9.72718	9.69817	9.62536
CUST_742_PI426073487	0.0097609	2.06448	up	noncoding	uc.263-	uc.263	UCR	207	chr9	-	86590283	86590490	CAGTTTATGCCTCACTGCCTGATTAGAAAGAGAGAAATGTATTTTATTACCTGCCTTTTA	exon sense-overlapping	NM_002140	HNRNPK	heterogeneous nuclear ribonucleoprotein K	-	86582997	86595569	313.288	164.824	8.31145	7.26568	322.312	332.166	285.385	199.845	119.951	193.535	145.966	8.34354	8.37705	8.21377	7.05147	7.56436	7.57121	6.87567
CUST_742_PI426073487	0.0097609	2.06448	up	noncoding	uc.263-	uc.263	UCR	207	chr9	-	86590283	86590490	CAGTTTATGCCTCACTGCCTGATTAGAAAGAGAGAAATGTATTTTATTACCTGCCTTTTA	exon sense-overlapping	NM_031263	HNRNPK	heterogeneous nuclear ribonucleoprotein K	-	86582997	86595184	313.288	164.824	8.31145	7.26568	322.312	332.166	285.385	199.845	119.951	193.535	145.966	8.34354	8.37705	8.21377	7.05147	7.56436	7.57121	6.87567
CUST_742_PI426073487	0.0097609	2.06448	up	noncoding	uc.263-	uc.263	UCR	207	chr9	-	86590283	86590490	CAGTTTATGCCTCACTGCCTGATTAGAAAGAGAGAAATGTATTTTATTACCTGCCTTTTA	exon sense-overlapping	NM_031262	HNRNPK	heterogeneous nuclear ribonucleoprotein K	-	86582997	86595569	313.288	164.824	8.31145	7.26568	322.312	332.166	285.385	199.845	119.951	193.535	145.966	8.34354	8.37705	8.21377	7.05147	7.56436	7.57121	6.87567
ASHG19A3A030773	0.0021224	2.11452	up	noncoding	ENST00000402250	RP11-317M22.1	Ensembl	217	chr6	-	160584570	160584787	TTGATCCTCAATCTGGGACTGTTTGCAGGAGTTTGGTTTGCCAGGAACTTGAGTGACATT	intergenic							246.04	126.661	7.97585	6.89552	271.575	232.942	233.603	141.122	119.674	127.722	118.126	8.0988	7.89892	7.92983	6.72769	6.93842	7.0443	6.87166
ASHG19A3A019045	0.000146687	3.00508	up	noncoding	ENST00000443486	AL109748.4	Ensembl	507	chr21	+	15164955	15165462	CAAGGAGAAAATGAAGCTGAGGCGTGAGCAATGGTTGCAGAAAATCGAAGCCATAAAACT	intergenic							991.487	313.811	9.86049	8.27309	1095.51	933.907	945.046	327.695	325.38	281.182	320.988	9.98079	9.76526	9.83543	8.24312	8.1352	8.33017	8.38386
ASHG19A3A050512	0.000142167	4.03955	up	noncoding	ENST00000455730	RP11-391H12.6	Ensembl	1119	chr13	+	113930930	113932049	GTTACCAACCACAGCTAAGGGATAATGAGGTTGTTCTGCTCAAGAAAAGTGCAGATACCC	intergenic							1943.38	439.603	10.7959	8.78166	1910.23	1829.39	2090.52	482.987	394.814	442.635	437.977	10.7497	10.6973	10.9405	8.71162	8.81776	8.93159	8.66566
ASHG19A3A013962	2.29908e-05	5.28859	up	noncoding	ENST00000326734	FAM87B	Ensembl	1944	chr1	+	752750	755214	CAGATCAGACAACCAACCACACAAAGTTTCTAAGAGCAAACTGTTCAGGTCGGCAAGTCA	intergenic							425.066	86.4657	8.73033	6.32745	426.831	434.376	413.99	87.8781	89.099	86.8015	82.0841	8.72627	8.74162	8.72311	6.1795	6.35728	6.34632	6.4267
ASHG19A3A043824	2.26406e-05	2.83942	up	noncoding	ENST00000424719	RP5-884C9.3	Ensembl	338	chr1	-	38546247	38546585	GAAACCCAAAGAGACAAATCTGAAGAGACTCTGGATGAGGGTCCTCCAAAATACATAAAA	intergenic							130.727	53.9392	7.1298	5.62421	133.42	125.53	133.231	53.4446	54.2832	52.6305	55.3987	7.14599	7.06131	7.18211	5.59042	5.62122	5.5942	5.69099
ASHG19A3A007941	0.000631347	2.40564	up	noncoding	ENST00000425294	RP3-471M13.1	Ensembl	312	chr1	-	172855086	172855398	AACACTATTAATGAGTGTGTGGCTCCATACCAAGGAGCTCCCTTTGAGGTGAAAGGGAAA	intergenic							963.338	380.941	9.82779	8.56137	936.348	952.392	1001.27	344.935	370.641	394.577	413.612	9.76971	9.79518	9.91849	8.62285	8.6374	8.4131	8.57214
ASHG19A3A016038	0.000795814	2.0753	up	noncoding	ENST00000424783	AC019097.7	Ensembl	735	chr2	+	99718480	99719215	CAAATCGATCATGGAGCTGATGAATATACTTGAACTTCGGAAATATGAAGCTATTCAGTT	intronic antisense	NM_025244	TSGA10	testis-specific gene 10 protein	-	99613723	99771187	2722.54	1125.46	11.2711	10.2177	3028.09	2725.27	2414.26	1133.98	1076.38	1160.21	1131.25	11.408	11.2587	11.1465	10.1695	10.2837	10.2316	10.1861
ASHG19A3A016038	0.000795814	2.0753	up	noncoding	ENST00000424783	AC019097.7	Ensembl	735	chr2	+	99718480	99719215	CAAATCGATCATGGAGCTGATGAATATACTTGAACTTCGGAAATATGAAGCTATTCAGTT	intronic antisense	NM_182911	TSGA10	testis-specific gene 10 protein	-	99613723	99758037	2722.54	1125.46	11.2711	10.2177	3028.09	2725.27	2414.26	1133.98	1076.38	1160.21	1131.25	11.408	11.2587	11.1465	10.1695	10.2837	10.2316	10.1861
ASHG19A3L0002544	0.0238669	3.46287	up	noncoding	BM805159	lincRNA-THSD7A-2	lincRNA	1079	chr7	+	11233008	11424086	CTTCATAAGGATATTTTTCAAGTTTGTGGGCTTGTCCTGGTACCTTCTACTGTGTAGAAG	intronic antisense	NM_015204	THSD7A	thrombospondin type-1 domain-containing protein	-	11410061	11871824	101.752	40.4966	6.78707	4.9951	94.2645	106.264	104.727	71.2988	20.0228	46.7321	23.9328	6.67793	6.83392	6.84936	4.31153	5.44379	6.02735	4.19773
ASHG19A3A044637	0.000421222	4.82815	up	noncoding	ENST00000458634	RP11-81B10.2	Ensembl	588	chr10	+	127961386	127961985	ATCAGTGAAGAAAAACTCTGTCTGCCATTTGGTCTTTATGGACAGACCACAGGAAAGGGA	intronic antisense	NM_021641	ADAM12	disintegrin and metalloproteinase	-	127729912	128077127	125.673	31.4289	7.07131	4.79984	123.956	110.674	142.387	27.1655	33.3871	28.3826	36.7805	7.04904	6.89144	7.27346	4.97164	4.69441	4.57619	4.95713
ASHG19A3A044637	0.000421222	4.82815	up	noncoding	ENST00000458634	RP11-81B10.2	Ensembl	588	chr10	+	127961386	127961985	ATCAGTGAAGAAAAACTCTGTCTGCCATTTGGTCTTTATGGACAGACCACAGGAAAGGGA	intronic antisense	NM_003474	ADAM12	disintegrin and metalloproteinase	-	127702901	128077127	125.673	31.4289	7.07131	4.79984	123.956	110.674	142.387	27.1655	33.3871	28.3826	36.7805	7.04904	6.89144	7.27346	4.97164	4.69441	4.57619	4.95713
ASHG19A3A027012	7.00625e-05	6.3637	up	noncoding	ENST00000415279	RP11-90H3.1	Ensembl	1779	chr1	+	106434360	106436139	CTGTCTGAGAAATATAAAAATCTAGTACTGAGGATTCCAAACAGAGGCATTGATTTACTG	intergenic							2502.93	364.87	11.1636	8.49375	2506.45	2478.47	2523.85	324.5	349.475	391.99	393.514	11.1473	11.132	11.2116	8.54816	8.62725	8.31371	8.48586
ASHG19A3A034510	0.000181474	2.46547	up	noncoding	ENST00000433950	RP11-575M4.1	Ensembl	276	chr7	+	70302723	70302999	AGTTAATGAAAATGCTTACAAAAGTGGCTCTGGCATGCAGATGGCAGAGGACAGCAAGAG	intergenic							1215.04	454.779	10.1396	8.8377	1270.48	1263.74	1110.91	444.707	463.025	437.265	474.119	10.1829	10.1805	10.0553	8.83539	8.79581	8.79808	8.92154
ASHG19A3A039095	0.000126127	4.00409	up	noncoding	ENST00000394889	RP11-3J11.1	Ensembl	264	chr9	+	111598612	111598877	GGAGCATTTCAAAGAGGTTTCTACTGGTACTACAACAAGTACATCGACGTGAAGAAAGGG	intergenic							5706.23	1216.57	12.3314	10.3299	5990.96	5521.4	5606.34	1309.08	1240.78	1202.75	1113.67	12.3749	12.2779	12.3415	10.142	10.33	10.4499	10.3978
ASHG19A3A040183	0.00416136	3.48581	up	noncoding	ENST00000416788	RP11-410C4.1	Ensembl	398	chr1	+	220621857	220622255	CTGAAGAACTTGCTACCAAACTGGGTAAAATATACACTGTTGAGTTTTCTGCACATAAAA	intergenic							8000.57	1966.58	12.7962	10.9947	8128.59	7712.24	8160.9	2263.22	1449.5	2610.87	1542.71	12.7928	12.7299	12.8659	10.6324	11.4628	11.2466	10.6369
ASHG19A3A009617	0.0140049	2.24378	up	noncoding	NR_024560	LOC100130148	RefSeq_NR	3024	chr17	+	43973148	43976163	GAAAAAGAATCACTCAAAAACAAATAAAAACAGCCGTAGGGGCCTAATACAGTGCTAGAC	intron sense-overlapping	NM_001203251	MAPT	microtubule-associated protein tau isoform 7	+	43971747	44105699	73.0437	40.0274	6.31579	5.14986	69.8832	87.5271	61.7207	34.533	43.4092	31.8051	50.3625	6.25902	6.5673	6.12106	5.44505	4.86609	4.93561	5.35269
ASHG19A3A009617	0.0140049	2.24378	up	noncoding	NR_024560	LOC100130148	RefSeq_NR	3024	chr17	+	43973148	43976163	GAAAAAGAATCACTCAAAAACAAATAAAAACAGCCGTAGGGGCCTAATACAGTGCTAGAC	intron sense-overlapping	NM_005910	MAPT	microtubule-associated protein tau isoform 2	+	43971747	44105699	73.0437	40.0274	6.31579	5.14986	69.8832	87.5271	61.7207	34.533	43.4092	31.8051	50.3625	6.25902	6.5673	6.12106	5.44505	4.86609	4.93561	5.35269
ASHG19A3A009617	0.0140049	2.24378	up	noncoding	NR_024560	LOC100130148	RefSeq_NR	3024	chr17	+	43973148	43976163	GAAAAAGAATCACTCAAAAACAAATAAAAACAGCCGTAGGGGCCTAATACAGTGCTAGAC	intron sense-overlapping	NM_016841	MAPT	microtubule-associated protein tau isoform 4	+	43971747	44105699	73.0437	40.0274	6.31579	5.14986	69.8832	87.5271	61.7207	34.533	43.4092	31.8051	50.3625	6.25902	6.5673	6.12106	5.44505	4.86609	4.93561	5.35269
ASHG19A3A009617	0.0140049	2.24378	up	noncoding	NR_024560	LOC100130148	RefSeq_NR	3024	chr17	+	43973148	43976163	GAAAAAGAATCACTCAAAAACAAATAAAAACAGCCGTAGGGGCCTAATACAGTGCTAGAC	intron sense-overlapping	NM_016835	MAPT	microtubule-associated protein tau isoform 1	+	43971747	44105699	73.0437	40.0274	6.31579	5.14986	69.8832	87.5271	61.7207	34.533	43.4092	31.8051	50.3625	6.25902	6.5673	6.12106	5.44505	4.86609	4.93561	5.35269
ASHG19A3A009617	0.0140049	2.24378	up	noncoding	NR_024560	LOC100130148	RefSeq_NR	3024	chr17	+	43973148	43976163	GAAAAAGAATCACTCAAAAACAAATAAAAACAGCCGTAGGGGCCTAATACAGTGCTAGAC	intron sense-overlapping	NM_001203252	MAPT	microtubule-associated protein tau isoform 8	+	43971747	44105699	73.0437	40.0274	6.31579	5.14986	69.8832	87.5271	61.7207	34.533	43.4092	31.8051	50.3625	6.25902	6.5673	6.12106	5.44505	4.86609	4.93561	5.35269
ASHG19A3A009617	0.0140049	2.24378	up	noncoding	NR_024560	LOC100130148	RefSeq_NR	3024	chr17	+	43973148	43976163	GAAAAAGAATCACTCAAAAACAAATAAAAACAGCCGTAGGGGCCTAATACAGTGCTAGAC	intron sense-overlapping	NM_001123066	MAPT	microtubule-associated protein tau isoform 6	+	43971747	44105699	73.0437	40.0274	6.31579	5.14986	69.8832	87.5271	61.7207	34.533	43.4092	31.8051	50.3625	6.25902	6.5673	6.12106	5.44505	4.86609	4.93561	5.35269
ASHG19A3A009617	0.0140049	2.24378	up	noncoding	NR_024560	LOC100130148	RefSeq_NR	3024	chr17	+	43973148	43976163	GAAAAAGAATCACTCAAAAACAAATAAAAACAGCCGTAGGGGCCTAATACAGTGCTAGAC	intron sense-overlapping	NM_016834	MAPT	microtubule-associated protein tau isoform 3	+	43971747	44105699	73.0437	40.0274	6.31579	5.14986	69.8832	87.5271	61.7207	34.533	43.4092	31.8051	50.3625	6.25902	6.5673	6.12106	5.44505	4.86609	4.93561	5.35269
ASHG19A3A009617	0.0140049	2.24378	up	noncoding	NR_024560	LOC100130148	RefSeq_NR	3024	chr17	+	43973148	43976163	GAAAAAGAATCACTCAAAAACAAATAAAAACAGCCGTAGGGGCCTAATACAGTGCTAGAC	intron sense-overlapping	NM_001123067	MAPT	microtubule-associated protein tau isoform 5	+	43971747	44105699	73.0437	40.0274	6.31579	5.14986	69.8832	87.5271	61.7207	34.533	43.4092	31.8051	50.3625	6.25902	6.5673	6.12106	5.44505	4.86609	4.93561	5.35269
ASHG19A3A017574	0.00529724	2.48862	up	noncoding	ENST00000443171	RP4-553F4.6	Ensembl	642	chr20	-	32375180	32398903	AATTTGTGATCTCTGCTTTACCTGAATTATTTCCGTGAATTGTGACATCAACCTCGCCAG	bidirectional	NM_176812	CHMP4B	charged multivesicular body protein 4b	+	32399109	32442173	56.6335	29.8516	5.96843	4.65309	62.7103	45.7735	61.4166	43.3054	27.434	17.6642	31.0029	6.09832	5.69131	6.11567	4.70886	3.96494	5.27344	4.66512
ASHG19A3A017574	0.00529724	2.48862	up	noncoding	ENST00000443171	RP4-553F4.6	Ensembl	642	chr20	-	32375180	32398903	AATTTGTGATCTCTGCTTTACCTGAATTATTTCCGTGAATTGTGACATCAACCTCGCCAG	intronic antisense	NM_032819	ZNF341	zinc finger protein 341	+	32319807	32380075	56.6335	29.8516	5.96843	4.65309	62.7103	45.7735	61.4166	43.3054	27.434	17.6642	31.0029	6.09832	5.69131	6.11567	4.70886	3.96494	5.27344	4.66512
ASHG19A3A023979	0.00312137	3.47325	up	noncoding	ENST00000498116	RP11-115L11.1	Ensembl	666	chr4	-	15732584	15733250	TCAACAAGAATAAGAAACTGGTCAAGAAACTGGCCAAGAGTATGATGCATTTTTGGCCTC	intronic antisense	NM_004334	BST1	ADP-ribosyl cyclase 2 precursor	+	15704572	15733796	4299.22	1076.26	11.9231	10.1268	4337.31	3920.39	4639.96	801.248	1061.96	1258.51	1183.31	11.9154	11.7775	12.0764	10.233	10.4002	9.7058	10.1683
ASHG19A3A037727	0.000129454	6.06712	up	noncoding	ENST00000458323	RP11-307E17.2	Ensembl	844	chr9	-	97049986	97050830	TTTAGGATACAATCAAACCCTAAAGCCAGGTATCAAACTGACACTGTCAGCTCTCCTGGA	intronic antisense	NM_194320	ZNF169	zinc finger protein 169	+	97021577	97065291	5375.95	778.798	12.25	9.64896	5422.36	5112.28	5593.23	908.523	682.035	648.425	876.207	12.2383	12.1728	12.3388	9.78061	9.39844	9.90182	9.51497
ASHG19A3A009604	2.68151e-05	20.1047	up	noncoding	uc010wjp.1	BX537922	UCSC_knowngene	2360	chr17	+	43585421	43587781	CACATCTGTTTTAGAAGAAAACGCAATTAAGATTATCTATGACAACAACCACCATCTCCA	intergenic							2398.41	116.977	11.1027	6.77326	2391.74	2375.99	2427.5	100.854	113.653	118.726	134.677	11.0769	11.0736	11.1576	6.92444	6.82993	6.54389	6.7948
ASHG19A3A046863	1.46124e-05	2.56022	up	noncoding	NR_002569	SCARNA9	RefSeq_NR	353	chr11	+	93454679	93455031	TGAAAAGGTTTTACTACTGATCTTTGTAACTATGATGGTTTCTACACTTGACCTGAGCTC	intron sense-overlapping	NM_033395	KIAA1731	hypothetical protein LOC85459	+	93394815	93463522	1342.26	478.346	10.2777	8.92147	1383.55	1332.66	1310.59	477.946	467.102	482.383	485.953	10.3006	10.2521	10.2805	8.87943	8.95418	8.91664	8.93564
ASHG19A3A032001	0.000544895	13.3188	up	noncoding	ENST00000407180	RP1-92C8.2	Ensembl	549	chr6	+	117752753	117753605	AAGTTAAAGACACTGATATTGTCCCAGTGATTGTTGGTAATAAGTGTGACTTGGAAGATA	intergenic							162.436	15.8693	7.41856	3.68317	158.182	144.648	184.479	16.7148	15.3542	8.98075	22.4275	7.37585	7.25525	7.62457	4.2071	2.92198	3.82263	3.78097
ASHG19A3A041386	0.000630019	4.07225	up	noncoding	ENST00000441325	DUSP5P	Ensembl	1132	chr1	+	228785987	228787119	TCATAAAGACCAAGCACTTCTGCCTGAAGGAGGCCTTCAATTATGTCAAGTGGAAGAGGA	intergenic							129.701	38.2562	7.11825	5.09243	137.137	126.929	125.037	30.1169	37.7163	44.1743	41.0174	7.18598	7.07592	7.09286	5.13913	5.35838	4.73005	5.14214
ASHG19A3A023430	7.56628e-05	8.65074	up	noncoding	ENST00000497538	RP11-111F10.2	Ensembl	873	chr3	+	155705092	155705965	GTCATCAAAGATGATATCTGGCCAAACCCATTACAGTACTACTTGGTTCCCGATATGGAT	intergenic							709.89	85.0027	9.41046	6.29763	746.354	702.082	681.235	96.592	81.1817	85.8274	76.4095	9.45957	9.37911	9.39269	6.07249	6.34003	6.48476	6.29325
ASHG19A3A014890	5.00908e-06	4.84543	up	noncoding	ENST00000416821	AC080075.3	Ensembl	482	chr2	-	204180112	204180594	CACCAGATATGCAGGGTTAGAGATGTTCTTGATTTTCTATAATGTCCCTATTCAAGATAG	intergenic							5790.55	1024.14	12.355	10.0783	5880.46	5789.59	5701.58	1081.85	978.481	1022.05	1014.17	12.3493	12.3493	12.3663	10.0088	10.088	10.1621	10.0544
ASHG19A3A007276	0.000454301	2.281	up	noncoding	NR_024240	HLA-J	RefSeq_NR	1580	chr6	+	29973747	29977731	CCCAAGCCCCTCATCCTGAGATGGGTCACACATTTCTGGAAACTTCTCAAGGTTCCAAGA	intergenic							10482.4	3800.14	13.1784	11.9887	10749.9	10519.4	10177.8	3510.76	3347.26	4219.68	4122.87	13.1836	13.1795	13.1722	12.0535	12.1625	11.8874	11.8515
ASHG19A3A039038	0.000124966	3.59883	up	noncoding	ENST00000418987	RP11-394D2.1	Ensembl	1100	chr9	+	103493521	103494621	GAAAATCAAGATTATTGCTCCTCCCGAGCTCAAATACTCTGTGTGGATTGGCTCCATCCT	intergenic							12820.7	2925.88	13.4622	11.6147	13120	12582.2	12759.8	3147.04	2536.86	3082.07	2937.55	13.4667	13.4296	13.4902	11.5752	11.7046	11.7285	11.4504
ASHG19A3A052361	0.000133158	2.6243	up	noncoding	AK025552		NRED	2497	chr15	-	73874194	73876675	TGACAACACCTTTAAGGATAGATTTTCTTTGAAGATAAGTTGCTGGGTTATGAACATGCT	intron sense-overlapping	NM_001161363	NPTN	neuroplastin isoform c precursor	-	73852343	73925753	420.87	168.754	8.71888	7.32694	434.839	417.831	409.939	170.978	145.604	165.721	192.713	8.75317	8.69063	8.71283	7.46875	7.33086	7.3387	7.16946
ASHG19A3A052361	0.000133158	2.6243	up	noncoding	AK025552		NRED	2497	chr15	-	73874194	73876675	TGACAACACCTTTAAGGATAGATTTTCTTTGAAGATAAGTTGCTGGGTTATGAACATGCT	intron sense-overlapping	NM_017455	NPTN	neuroplastin isoform a precursor	-	73852343	73925753	420.87	168.754	8.71888	7.32694	434.839	417.831	409.939	170.978	145.604	165.721	192.713	8.75317	8.69063	8.71283	7.46875	7.33086	7.3387	7.16946
ASHG19A3A052361	0.000133158	2.6243	up	noncoding	AK025552		NRED	2497	chr15	-	73874194	73876675	TGACAACACCTTTAAGGATAGATTTTCTTTGAAGATAAGTTGCTGGGTTATGAACATGCT	intron sense-overlapping	NM_001161364	NPTN	neuroplastin isoform d precursor	-	73852343	73925753	420.87	168.754	8.71888	7.32694	434.839	417.831	409.939	170.978	145.604	165.721	192.713	8.75317	8.69063	8.71283	7.46875	7.33086	7.3387	7.16946
ASHG19A3A052361	0.000133158	2.6243	up	noncoding	AK025552		NRED	2497	chr15	-	73874194	73876675	TGACAACACCTTTAAGGATAGATTTTCTTTGAAGATAAGTTGCTGGGTTATGAACATGCT	intron sense-overlapping	NM_012428	NPTN	neuroplastin isoform b precursor	-	73852343	73925753	420.87	168.754	8.71888	7.32694	434.839	417.831	409.939	170.978	145.604	165.721	192.713	8.75317	8.69063	8.71283	7.46875	7.33086	7.3387	7.16946
ASHG19A3A017388	0.03113	2.60595	up	noncoding	ENST00000443141	RPL7AL3	Ensembl	290	chr20	-	16664759	16665049	ACAACAACAAATATGATGAGATCCATCATCACGGGGGAAGCAATGTCCCAGGCCCAAAAT	intergenic							46.9957	25.5571	5.72234	4.34053	49.6331	43.4642	47.8899	18.0511	34.5019	12.7031	36.9722	5.77444	5.6204	5.77218	4.9803	3.42967	3.94339	5.00875
ASHG19A3A038907	3.79731e-05	2.18114	up	noncoding	ENST00000438325	RP13-93L13.2	Ensembl	1192	chr9	+	92064472	92065664	ATTTGTTGCCCAGTTTAAATTTACAGTTCTGCTCCTGCCCAATGGCCCCATGCAGATAAC	intronic antisense	NM_006378	SEMA4D	semaphorin-4D isoform 1	-	91992151	92094611	13545.3	5045.68	13.5358	12.4108	13630.4	13523.9	13481.5	4840.19	4943.35	5172.13	5227.05	13.52	13.5237	13.5638	12.4051	12.4608	12.3615	12.4156
ASHG19A3A038907	3.79731e-05	2.18114	up	noncoding	ENST00000438325	RP13-93L13.2	Ensembl	1192	chr9	+	92064472	92065664	ATTTGTTGCCCAGTTTAAATTTACAGTTCTGCTCCTGCCCAATGGCCCCATGCAGATAAC	intronic antisense	NM_001142287	SEMA4D	semaphorin-4D isoform 2	-	91975705	92094611	13545.3	5045.68	13.5358	12.4108	13630.4	13523.9	13481.5	4840.19	4943.35	5172.13	5227.05	13.52	13.5237	13.5638	12.4051	12.4608	12.3615	12.4156
ASHG19A3A020238	7.67982e-06	2.49104	up	noncoding	ENST00000457759	AP000357.5	Ensembl	438	chr22	+	25082021	25082556	TTTCGTTCTTCCTGGAACACTTACTATACTAACACAGAGTTGATAATAGTTGTGGACAGT	intergenic							1916.2	684.359	10.7825	9.46573	1978.36	1937.25	1832.99	663.608	677.238	680.157	716.433	10.8047	10.7816	10.7612	9.47371	9.47182	9.41288	9.50452
CUST_897_PI426073487	7.5854e-06	5.29952	up	noncoding	uc.418-	uc.418	UCR	217	chr17	-	56082227	56082444	AATGGTATGACTCCAAGTGCTATTGTCACAGATGAAATTGGCAGTATTGACCTTATACTA	exon sense-overlapping	NM_001078166	SRSF1	serine/arginine-rich splicing factor 1 isoform	-	56078279	56084707	9832.29	1545.81	13.0906	10.6848	10126.5	10001.9	9368.47	1412.3	1563.25	1580.04	1627.65	13.1068	13.1055	13.0597	10.7093	10.7292	10.5637	10.7369
CUST_897_PI426073487	7.5854e-06	5.29952	up	noncoding	uc.418-	uc.418	UCR	217	chr17	-	56082227	56082444	AATGGTATGACTCCAAGTGCTATTGTCACAGATGAAATTGGCAGTATTGACCTTATACTA	exon sense-overlapping	NM_006924	SRSF1	serine/arginine-rich splicing factor 1 isoform	-	56078279	56084707	9832.29	1545.81	13.0906	10.6848	10126.5	10001.9	9368.47	1412.3	1563.25	1580.04	1627.65	13.1068	13.1055	13.0597	10.7093	10.7292	10.5637	10.7369
ASHG19A3A007686	0.000194203	3.19284	up	noncoding	NR_029402	CCT7	RefSeq_NR	1895	chr2	+	73461363	73480149	AGCTTTCCGCACAGCCACCCAGCTGGGAGCAGAGGAAGCTGCTGGAAAAGTGTGCCATGA	exon sense-overlapping	NM_001166285	CCT7	T-complex protein 1 subunit eta isoform d	+	73461363	73480150	1709.87	483.237	10.6115	8.93669	1813.8	1753.63	1562.19	495.698	483.474	483.683	470.095	10.6771	10.6309	10.5266	8.82231	8.95784	8.9787	8.98789
ASHG19A3A007686	0.000194203	3.19284	up	noncoding	NR_029402	CCT7	RefSeq_NR	1895	chr2	+	73461363	73480149	AGCTTTCCGCACAGCCACCCAGCTGGGAGCAGAGGAAGCTGCTGGAAAAGTGTGCCATGA	exon sense-overlapping	NM_006429	CCT7	T-complex protein 1 subunit eta isoform a	+	73461363	73480150	1709.87	483.237	10.6115	8.93669	1813.8	1753.63	1562.19	495.698	483.474	483.683	470.095	10.6771	10.6309	10.5266	8.82231	8.95784	8.9787	8.98789
ASHG19A3A007686	0.000194203	3.19284	up	noncoding	NR_029402	CCT7	RefSeq_NR	1895	chr2	+	73461363	73480149	AGCTTTCCGCACAGCCACCCAGCTGGGAGCAGAGGAAGCTGCTGGAAAAGTGTGCCATGA	exon sense-overlapping	NM_001009570	CCT7	T-complex protein 1 subunit eta isoform b	+	73461363	73480150	1709.87	483.237	10.6115	8.93669	1813.8	1753.63	1562.19	495.698	483.474	483.683	470.095	10.6771	10.6309	10.5266	8.82231	8.95784	8.9787	8.98789
ASHG19A3A007686	0.000194203	3.19284	up	noncoding	NR_029402	CCT7	RefSeq_NR	1895	chr2	+	73461363	73480149	AGCTTTCCGCACAGCCACCCAGCTGGGAGCAGAGGAAGCTGCTGGAAAAGTGTGCCATGA	exon sense-overlapping	NM_001166284	CCT7	T-complex protein 1 subunit eta isoform c	+	73461363	73480150	1709.87	483.237	10.6115	8.93669	1813.8	1753.63	1562.19	495.698	483.474	483.683	470.095	10.6771	10.6309	10.5266	8.82231	8.95784	8.9787	8.98789
ASHG19A3H0000076	0.000963033	31.6754	up	noncoding	nc-HOXB9-205-	nc-HOXB9-205	HOX cluster	838	chr17	-	46802225	46803063	AGGAAGATGAGGTCGATTTCCTGATTTAAAAAATCGTCCAAGCCCCGTGGTCCAGCTTAA	exon sense-overlapping	NM_006361	HOXB13	homeobox protein Hox-B13	-	46802126	46806111	1360.58	47.7592	10.2975	5.31224	1414.88	1303.63	1363.21	70.8779	32.3391	61.1191	26.7006	10.3285	10.2239	10.3402	4.47743	5.84121	6.01813	4.91219
ASHG19A3A044925	0.00048406	2.65606	up	noncoding	AK128017		misc_RNA	1846	chr1	-	46048538	46050383	GGGGTACCGTGATTAGACGCTTTAAAGCTATTAGCTATCTTGTTTAATATTAACAATGCT	natural antisense	NM_002482	NASP	nuclear autoantigenic sperm protein isoform 2	+	46049659	46084578	179.534	77.1011	7.56083	6.15155	170.504	179.752	188.345	85.529	65.0494	80.0109	77.8152	7.48279	7.54842	7.65129	6.09932	6.23907	6.30468	5.96312
ASHG19A3A044925	0.00048406	2.65606	up	noncoding	AK128017		misc_RNA	1846	chr1	-	46048538	46050383	GGGGTACCGTGATTAGACGCTTTAAAGCTATTAGCTATCTTGTTTAATATTAACAATGCT	natural antisense	NM_152298	NASP	nuclear autoantigenic sperm protein isoform 3	+	46049659	46084578	179.534	77.1011	7.56083	6.15155	170.504	179.752	188.345	85.529	65.0494	80.0109	77.8152	7.48279	7.54842	7.65129	6.09932	6.23907	6.30468	5.96312
ASHG19A3A044925	0.00048406	2.65606	up	noncoding	AK128017		misc_RNA	1846	chr1	-	46048538	46050383	GGGGTACCGTGATTAGACGCTTTAAAGCTATTAGCTATCTTGTTTAATATTAACAATGCT	natural antisense	NM_001195193	NASP	nuclear autoantigenic sperm protein isoform 4	+	46049659	46084578	179.534	77.1011	7.56083	6.15155	170.504	179.752	188.345	85.529	65.0494	80.0109	77.8152	7.48279	7.54842	7.65129	6.09932	6.23907	6.30468	5.96312
ASHG19A3A049639	7.85126e-05	2.98159	up	noncoding	ENST00000397973	RP11-129M14.1	Ensembl	869	chr13	-	65883986	65885085	AAGGTCTTGCAGAAGATGATCAGAAAAGATACATTCATTGCCCATGAGCTGGCTGCAGAG	intergenic							58.6755	24.839	6.02241	4.44633	61.6022	60.1926	54.2316	21.9594	24.4312	25.4841	27.4813	6.07097	6.05581	5.94046	4.51958	4.5326	4.24456	4.48858
ASHG19A3A025243	5.46386e-05	2.33663	up	noncoding	ENST00000514075	GMPSP	Ensembl	574	chr4	+	8176147	8176721	GTAGAGGTGGTATTAAAGATGGTCACTGAGATTAAGAAGATTCCTGGTATTTCTCGAATT	intergenic							23431.6	7945.69	14.3052	13.0808	23866.8	23634.5	22793.6	8280.99	7249.07	7823.31	8429.39	14.297	14.3098	14.3088	13.1129	13.062	13.1546	12.9936
ASHG19A3A051900	0.00177348	2.08508	up	noncoding	NR_027407	GOLGA8DP	RefSeq_NR	5339	chr15	-	22702284	22715728	TCTTGTAAGCGGAATGTAAAACGGAAATACTGAAAGACTTTTGCCTAAAGTGGCATTATT	intergenic							828.299	380.669	9.616	8.5559	926.406	831.215	727.275	321.65	391.944	414.878	394.204	9.75283	9.61718	9.478	8.55049	8.71699	8.30033	8.65581
ASHG19A3A029768	0.00133083	12.4025	up	noncoding	ENST00000420261	PPP1R2P1	Ensembl	678	chr6	-	32846947	32847625	TGACCAACAGCAAAATAAATCACGAAGTTCATAGAAGGGATTTGTTCAACACTCTTATTG	intergenic							140.96	14.5343	7.21424	3.58168	170.781	137.187	114.913	14.0701	19.2267	12.9634	11.8772	7.48444	7.18196	6.97632	3.18199	3.46221	3.54473	4.1378
ASHG19A3A047861	0.000474896	2.99801	up	noncoding	ENST00000437223	AC079598.1	Ensembl	102	chr12	-	88176894	88176996	GAAGATGAGAGCGACTTGTTTCATGAGGAGCTGGAAGATTTTTATGACTTGGATCTATAG	intergenic							258.253	94.7655	8.04326	6.45925	277.997	237.478	259.285	103.831	86.9167	97.8969	90.4172	8.12997	7.92392	8.07587	6.31963	6.53915	6.58803	6.39019
ASHG19A3A013245	0.00219361	3.9715	up	noncoding	ENST00000414795	AC017076.5	Ensembl	506	chr2	-	6969010	6980595	CATCCAGTGAAGACTTCCTCTGGATTATTGCAGCAGACACCTCTAACCTCCTTAATCTGT	intergenic							609.861	159.937	9.20574	7.21606	638.045	590.331	601.207	207.555	122.142	177.714	132.337	9.25894	9.14197	9.21631	6.89686	7.4364	7.62869	6.90227
ASHG19A3A019236	6.0695e-06	3.7172	up	noncoding	ENST00000440629	AP001432.14	Ensembl	520	chr21	+	38593719	38610045	ATTCAGATTCAGACACAGGAATTATGGTGACGGTAGAAATGGACTGGAAGGTTCGTTCCC	intronic antisense	NM_006052	DSCR3	Down syndrome critical region protein 3	-	38595725	38639833	152.829	48.0195	7.34085	5.44663	154.225	160.331	143.931	48.3059	45.6635	49.7746	48.3339	7.34253	7.39294	7.28707	5.38285	5.53485	5.43744	5.43139
ASHG19A3A024147	0.000195856	2.83946	up	noncoding	AK125335		misc_RNA	4215	chr4	-	47842139	47846356	TGTATGCAGTTTGAAACTCCACAGTCCAGATTCATTTGAGTTAACACCTCTGTATCCCAT	intergenic							109.762	46.3627	6.88902	5.38341	109.742	101.461	118.083	55.0862	42.0794	39.9587	48.3263	6.88076	6.77343	7.01289	5.38232	5.20767	5.63663	5.30702
CUST_95_PI426073487	6.93092e-06	3.50809	up	noncoding	uc.97+	uc.97	UCR	442	chr2	+	172822630	172823072	CAGACAAAACCCGGCCACGTGTAAGGTAATTGGCAGTATAACACGTGCCTTGTCTTTTAT	exon sense-overlapping	NM_003642	HAT1	histone acetyltransferase type B catalytic	+	172778934	172848600	1828.27	474.22	10.7136	8.90294	1884.55	1820.8	1779.46	488.985	439.559	453.66	514.675	10.734	10.6896	10.7173	8.96244	8.85742	8.95182	8.84008
[truncated: 2,713 more rows]

## Sheet: M vs T down
# Fold-Change cut-off: 2.0 # P-value cut-off: 0.05 # Condition pairs: M vs T # Column A: ProbeName, it represents probe name. # Column B: P, P-value, P-value calculated from paired t-test. # Column C: FC (abs), Absolute Fold Change, the absolute ratio (no log scale) of normalized intensities between two conditions. # Column D: Regulation, it depicts which group has greater or lower intensity valu…
[truncated: 4,313 more rows]

[truncated: 8 more sheets:  M1 vs T4 up,  M1 vs T4 down,  M2 vs T3 up,  M2 vs T3 down,  M3 vs T1 up,  M3 vs T1 down,  M3 vs T2 up,  M3 vs T2 down]
