# Supplementary material for: Long Noncoding RNA Expression Signatures of Metastatic Nasopharyngeal Carcinoma and Their Prognostic Value
Source: Biomed Res Int. 2015 Sep 13;2015:618924. doi: 10.1155/2015/618924 (PMC4584063; doi:10.1155/2015/618924)
Supplement: Supplementary file 1 — Table S01. The clinical information corresponding to the seven NPC patient samples used for microarray analysis. Table S02. Four different lncRNA members (LOC84740, ENST00000498296, AL359062, and ENST00000438550) were selected to verify their expression levels via QPCR. This table supply the primer sequences used for Real-time PCR of the four lncRNAs. Table S03. lncRNA Expression Profiling Data. A total of 33,045 lncRNA probes were used in our lncRNA microarray. Up to 30,610 lncRNAs were detected in all seven samples. Table S04. Differentially Expressed lncRNAs. A total of 8,088 lncRNAs were identified to be significantly differentially expressed(≥2-fold) between the metastatic and primary NPC tumors in the microarray. Among these, 3,778 lncRNAs were found to be consistently upregulated; 4,310 lncRNAs were downregulated. Table S05. HOX cluster profiling. In this study, we detected the transcripts in HOX loci, 477 transcribed regions were found. Among them, 257 were ncRNAs and 220 were HOX coding transcripts. Table S06. Differentially expressed IncRNAs at HOX locus. In the four randomly paired groups, the number of differentially expressed lncRNAs differed, but several lncRNAs displayed similar changes in expression. Compared with the NPC primary tumors, 70 lncRNAs were found to be differentially expressed in metastatic tissues; 51 coding transcripts were differentially expressed. Table S07. Rinn lincRNA expression profiles. A total of 4,199 Rinn lincRNAs were detected in this microarray analysis. Table S08. Differentially expressed Rinn lincRNAs. A total of 1,069 Rinn lincRNAs were found to be differentially expressed. Table S09. Enhancer lncRNAs profiles. A total of 1,598 enhancer lncRNAs were detected, of which 468 lncRNAs were differentially expressed. Table S10. Data for enhancer lncRNAs regulating a nearby coding gene. The differentially expressed enhancer lncRNAs and their nearby coding genes (distance < 300 kb) were presented. Table S11. Data for lincRNAs reg [file 618924.f1.zip › S05 HOX cluster profiling.xls]

## Sheet: HOX cluster profiling
HOX cluster profiling (Entities where at least 4 out of 7 samples have flags in Present or Marginal). This table contains profiling data of all probes in the four HOX loci, targeting 407 discrete transcribed regions (Rinn, Kertesz et al. 2007), LncRNAs and coding transcripts. # Column A: ProbeName, it represents the probe name. # Column B ~ H: Raw Intensity of each sample. # Column I ~ O: Normali…
	Raw Intensity							Normalized Intensity							Flags							Annotations
ProbeName	[M1](raw)	[M2](raw)	[M3](raw)	[T1](raw)	[T2](raw)	[T3](raw)	[T4](raw)	[M1](normalized)	[M2](normalized)	[M3](normalized)	[T1](normalized)	[T2](normalized)	[T3](normalized)	[T4](normalized)	[M2]	[M1]	[M3]	[T4]	[T2]	[T3]	[T1]	type	seqname	GeneSymbol	source	RNAlength	chrom	strand	txStart	txEnd	Xhyb	probeSeq	EntrezID	unigene	GO	ProteinAccession	product
ASHG19A3H0000507	80.8585	59.1829	72.3532	78.8766	103.625	81.8965	122.023	6.46766	6.03131	6.33881	6.1837	6.6555	6.27155	6.7775	P	P	P	M	M	M	M	coding	NM_153693_intron1-	NM_153693	HOX cluster	11160	chr12	-	54411198	54422359		AGGATAAGGAAGGGTTAGTGAAGTAGGAATTCATCCCTTTGCCTTTACCTGGTCGGTCTA
CUST_48_PI426249100	22.6342	24.8085	16.4125	22.1793	26.6492	31.9797	31.96	4.66836	4.87871	4.29621	4.25933	4.61756	4.87361	4.75717	A	P	A	M	M	M	M	coding	NM_021193_Exon1+	NM_021193	HOX cluster	574	chr2	+	176964529	176965103	NM_021193,	AATCTGCAGTCGCCAGACTCTTTCTACTTCTCCAACCTGAGGCCGAATGGCGGCCAGTTG
ASHG19A3H0000573	132.022	138.436	124.036	74.0039	76.5302	78.818	80.6277	7.13145	7.19574	7.08334	6.08568	6.20426	6.21649	6.15531	P	P	P	M	M	M	M	coding	NM_014620_Exon4-	NM_014620	HOX cluster	1180	chr12	-	54448633	54449813		ACTAATTCACATCCACTGGTTTATTATTGATCACGGGGCATTTCACATCGACACTAAAAT
CUST_38_PI426249100	111.838	141.009	109.453	41.7152	69.0349	67.4843	70.0215	6.90631	7.22069	6.91323	5.21829	6.05403	5.9923	5.94031	P	P	P	M	M	M	M	coding	NM_004502_Exon1-	NM_004502	HOX cluster	503	chr17	-	46687880	46688383	NM_004502,	TTTCTAAATATCCAGCCTCAAGTTCGGTTTTCGCTACCGGAGCCTTCCCAGAACAAACTT
ASHG19A3A016629	1352.82	1293.77	1170.39	51.1891	48.0965	37.0805	47.4628	10.2719	10.2145	10.1273	5.53458	5.50845	5.09688	5.35738	P	P	P	P	P	P	P	coding	NM_021192	HOXD11	RefSeq_coding	1463	chr2	+	176972083	176974314		CTTCCTCTTCGGTGAATGCAGGTTATTTAAACTTTGGGAAATGTACTTTTAGTCTGTCAT	3237	Hs.421136	GO:0043565|GO:0003700|GO:0030528|GO:0009952|GO:0001658|GO:0060351|GO:0048589|GO:0009953|GO:0042733|GO:0001656|GO:0001759|GO:0007389|GO:0010720|GO:0032332|GO:0009954|GO:0006355|GO:0001501|GO:0006351|GO:0005634	NP_067015	Homeobox D11
ASHG19A3A048663	67.9468	66.0047	67.6458	55.2356	71.2917	53.4593	92.7024	6.2173	6.18185	6.24467	5.64057	6.09646	5.647	6.35614	P	P	P	P	P	P	P	coding	NM_004503	HOXC6	RefSeq_coding	1681	chr12	+	54422193	54424606		TAGACCGACCAGGTAAAGGCAAAGGGATGAATTCCTACTTCACTAACCCTTCCTTATCCT	3221	Hs.549040	GO:0043565|GO:0003700|GO:0030528|GO:0009952|GO:0051216|GO:0048562|GO:0007275|GO:0006355|GO:0006351|GO:0005634	NP_705897	Homeobox C4
CUST_1_PI426247286	22.6433	12.8382	23.3002	18.2281	31.8102	26.0133	31.7332	4.66877	4.06437	4.77187	3.96163	4.88701	4.56342	4.74586	A	P	P	P	P	P	P	coding	NM_017410_intron1+	NM_017410	HOX cluster	5356	chr12	+	54333426	54338783		ATAACAGAAATGAAAAGCATTAGGGAGCTTCACTATGCAGTGCAATCCTCTGGCCCCGTT
CUST_15_PI426249100	100.79	128.739	69.8163	81.8955	169.866	259.429	256.081	6.77001	7.09745	6.28848	6.24107	7.40156	8.0115	7.90683	P	P	P	P	P	P	P	coding	NM_018953_Exon1+	NM_018953	HOX cluster	529	chr12	+	54426831	54427360	uc.344+,NM_018953,	TATAAGCAGAGCCCCAATATCCCTGCCTATAACATGCAAACTTGTGGGAACTATGGATCG
CUST_50_PI426249100	146.843	171.638	174.276	210.608	366.145	385.775	366.534	7.27423	7.48596	7.5454	7.65015	8.55109	8.60422	8.44333	P	P	P	P	P	P	P	coding	NM_021192_Exon1+	NM_021192	HOX cluster	781	chr2	+	176972083	176972864	NM_021192,	GTCTGACTTCGCTAGCAAGCCTTCGTTCCTTTCCCAACCGTCGTCCTGCCAGATGACTTT
CUST_17_PI426249100	2465.29	2332.1	2350.47	4759.98	1405.75	1434.45	1239.35	11.1219	11.0475	11.1105	12.3445	10.5962	10.5919	10.3155	P	P	P	P	P	P	P	coding	NM_014620_Exon2+	NM_014620	HOX cluster	117	chr12	+	54446943	54447060	NM_014620,	AGAAATGACGTCAGAATCATTTGCATCCCGCTGCCTCTACCTGCCTGGTCCAGCTGGGAC
ASHG19A3H0000526	63.5715	57.0771	57.3062	90.0315	94.9308	79.6717	110.489	6.11676	5.98564	6.01789	6.38482	6.52664	6.23195	6.62399	P	P	P	P	P	P	P	coding	NM_006361_intron2+	NM_006361	HOX cluster	948	chr17	+	46804405	46805354		CCACCATCACATACGTCCAGTCTTCATGCATTTCCAGACTCTTGGCCACTCTTTTAGATT
ASHG19A3A048665	2518.92	2073.18	2050.85	4641.19	935.264	3492.76	1073.18	11.1527	10.8894	10.9141	12.3075	9.98553	11.8831	10.0892	P	P	P	P	P	P	P	coding	NM_014620	HOXC4	RefSeq_coding	2300	chr12	+	54410641	54449813		AGAAATGACGTCAGAATCATTTGCATCCCGCTGCCTCTACCTGCCTGGTCCAGCTGGGAC	3221	Hs.549040	GO:0043565|GO:0003700|GO:0030528|GO:0009952|GO:0051216|GO:0048562|GO:0007275|GO:0006355|GO:0006351|GO:0005634	NP_705897	Homeobox C4
ASHG19A3H0000512	167.343	133.106	147.695	148.124	240.608	168.769	266.404	7.45818	7.14163	7.32143	7.11658	7.9314	7.35809	7.9619	P	P	P	P	P	P	P	coding	NM_002144_intron2+	NM_002144	HOX cluster	451	chr17	+	46607237	46607689		CTCCCGGGGCTGGCTCTGGACCTCCATTTGCCATTCTGCCCAAGTACAGTTGTCAAAGTT
CUST_11_PI426247286	6168.06	5752.47	5696.77	8657.94	3935.48	3642.07	3250.08	12.4144	12.3409	12.3622	13.2323	12.0956	11.9425	11.7173	P	P	P	P	P	P	P	coding	NM_014620_intron3+	NM_014620	HOX cluster	487	chr12	+	54448145	54448633		TTTAAGCTTGATGACTTTATTTCCACCACTCCCTCCTCCTGTTTCTCAGAGCTGAGGATG
ASHG19A3A008504	31.6243	23.007	24.4549	21.3008	20.9423	11.7481	21.7871	5.13913	4.78033	4.8389	4.19692	4.2644	3.30619	4.16598	A	P	P	P	P	A	P	coding	NM_002146	HOXB3	RefSeq_coding	3627	chr17	-	46626232	46651810		AAACAGATATTCCCCTGGATGAAAGAGTCGAGGCAAACGTCCAAGCTGAAAAACAACTCC	3213	Hs.654560	GO:0043565|GO:0003700|GO:0030528|GO:0001525|GO:0009952|GO:0051216|GO:0060216|GO:0048704|GO:0021615|GO:0007275|GO:0006355|GO:0030878|GO:0005634	NP_002137	Homeobox B3
CUST_57_PI426249100	1806.47	1707.95	1576.16	797.966	679.236	722.324	760.18	10.6729	10.59	10.5387	9.69899	9.50876	9.56825	9.56153	P	P	P	P	P	P	P	coding	NM_019558_Exon2+	NM_019558	HOX cluster	682	chr2	+	176996044	176996726	NM_019558,	TCTGAGCTAGTGATTTGCCTCAACAACGTAAACTTCCTAATGATTAGCACTTAATAATTG
CUST_28_PI426247286	82.9698	66.4519	78.9271	70.0159	78.4549	52.6288	85.2641	6.50046	6.1907	6.46211	5.99967	6.24015	5.62116	6.23535	M	P	P	P	P	P	P	coding	NM_021193_intron1+	NM_021193	HOX cluster	145	chr2	+	176965103	176965249		TGGGGGCGGGCAATAGACAGAGTACGGGCTGGGTTGACGTGGGTTGGGGCTGTGTTGCAG
CUST_52_PI426249100	45.0447	31.6911	49.6367	28.8851	21.799	19.5656	20.3263	5.63814	5.20015	5.82047	4.6691	4.32141	4.12789	4.05001	P	P	P	P	P	P	P	coding	NM_002148_Exon1+	NM_002148	HOX cluster	815	chr2	+	176981491	176982306	NM_002148,	TGGATATTTTAGACTGAGTCAGACCTACGCCACCGGGAAAACCCAAGAGTACAATAATAG
ASHG19A3H0000638	33.7683	34.1747	24.1482	21.3119	13.0937	15.8443	16.7962	5.23552	5.30009	4.81928	4.19773	3.51721	3.79292	3.75123	P	P	P	P	A	P	P	coding	NM_152739_Exon2+	NM_152739	HOX cluster	1403	chr7	+	27202057	27203460		TTATTTGGCAAAAAGTTAAATATCATCTCAACACAACAATTTGGTCAGTAGGCCTTGAGG
CUST_64_PI426249100	92.6194	110.743	97.6887	57.253	96.3812	97.8711	108.656	6.65016	6.89208	6.75465	5.69198	6.54907	6.53856	6.59872	P	P	P	P	P	P	P	coding	NM_153620_Exon3-	NM_153620	HOX cluster	1799	chr7	-	27132615	27134414	NM_153620,NM_005522,	AACCTTTTCACCTCCAACTGGATGTTGACGTATATATAAACAGAACTCCCTTCAAAAGCC
ASHG19A3H0000506	33.4765	44.3262	40.5164	40.4417	41.2162	46.5467	52.8066	5.22345	5.647	5.54088	5.1708	5.27766	5.4382	5.51933	P	P	P	P	P	P	P	coding	NM_014620_intron1-	NM_014620	HOX cluster	35744	chr12	-	54411198	54446943		TAGAGCCTGCTTGCTTCTGGCTAGGAGCTGTATCCATGTAACACGTGTGTTTACATGTAA
CUST_31_PI426249100	1350.99	1356.68	1207.77	77.124	68.1049	47.1391	64.5662	10.2705	10.2756	10.1672	6.14821	6.03407	5.45701	5.82033	P	P	P	P	P	P	P	coding	NM_002147_Exon2-	NM_002147	HOX cluster	1199	chr17	-	46668619	46669818	NM_002147,	TGATTCGCTTTTGGTATTTGTTTGTAGCTTTCCTGGAAGTCAAATAAATGTTTCCCCCAC
CUST_49_PI426247286	133.566	86.1625	134.902	126.332	56.5115	36.0784	33.1039	7.14807	6.54307	7.19782	6.88178	5.75188	5.05614	4.80914	P	P	P	P	P	P	P	coding	NM_152739_intron2-	NM_152739	HOX cluster	1035	chr7	-	27203460	27204496		AAGTTTTACTGCGTGCAATTTTAAGTGACTGTCTGTGCGTCTGTCTGCCAGGGTTCCATT
ASHG19A3H0000515	9.31658	5.75222	5.40761	39.2437	35.4291	36.8315	40.5197	3.42401	2.94347	2.874	5.12846	5.05017	5.08812	5.12047	A	A	A	P	P	P	P	coding	NM_002146_intron3+	NM_002146	HOX cluster	2897	chr17	+	46629994	46632892		ACTGGGGCTCGAATCCATCTTAGGAACTGAAAAGGGAACTGACATCAATAGGGTTTTTTC
CUST_40_PI426247286	17.5553	7.19165	21.3947	18.64	25.6041	31.8462	26.103	4.29716	3.42362	4.65738	3.9946	4.55674	4.86792	4.44215	A	A	P	P	P	P	P	coding	NM_153632_intron3-	NM_153632	HOX cluster	1393	chr7	-	27148339	27149733		AAATGAGGGAGTATCACTGTTTTACCCACCAGGAGAGAGGATAGCACCTAGTTCCTACTT
CUST_55_PI426249100	2213.6	2152.12	2046.71	2304.48	2174.28	1877.46	2349.5	10.9672	10.9381	10.9116	11.2763	11.2213	10.988	11.247	P	P	P	P	P	P	P	coding	NM_014213_Exon2+	NM_014213	HOX cluster	983	chr2	+	176988661	176989644	nc-HOXD8-19-,NM_014213,	TGCCCGAGGACCAGTTGTAAATGTTACTGCTTCCTACTAATAAATGCTGACCTGATCAAA
ASHG19A3H0000643	92.5009	76.51	91.3538	185.622	30.2278	171.16	66.7012	6.64853	6.38361	6.65978	7.46404	4.81087	7.37986	5.86707	P	P	P	P	P	P	P	coding	NM_005523_Exon2+	NM_005523	HOX cluster	1871	chr7	+	27220776	27222647	nc-HOXA10-82+,	ATTTCCACCGTCTTTATTTTCCTTGTGCCCAGTTGCCTGTATAAGTGCTGCAACACACAC
CUST_2_PI426247286	56.5943	44.6066	56.6989	50.4391	67.3474	51.2202	67.9207	5.95659	5.65581	6.00357	5.51067	6.01752	5.57752	5.8943	P	P	P	P	P	P	P	coding	NM_173860_intron1+	NM_173860	HOX cluster	787	chr12	+	54349323	54350111		AAAGAAATGCCAGTGGATGCGTTTACTCTGCCATTCGCCCATATCTGTTGTAACTGATCC
ASHG19A3H0000592	56.29	60.8795	66.0957	44.8858	68.1463	76.4885	71.0492	5.95034	6.07116	6.20963	5.33278	6.035	6.17338	5.95886	P	P	P	P	P	P	P	coding	NM_024016_Exon2+	NM_024016	HOX cluster	1163	chr17	+	46689708	46690871		TCTCGCTTGTAAACTTTATTGTAACTCTTCCGCCCTTTTCAGGCGCAGACAACAGAACAA
CUST_70_PI426249100	94.1442	102.911	103.971	26.4373	19.7395	29.2467	31.8331	6.67543	6.79203	6.84012	4.53432	4.17282	4.73839	4.75028	P	P	P	P	P	P	P	coding	NM_153631_Exon4-	NM_153631	HOX cluster	2530	chr7	-	27145809	27148339	NM_153632,NM_153631,NM_030661,	GGGAGGGGGAGAGAGCAAGGAGATCGGTATCTTTGTAATAAAACTGCAATTTTATAAATT
CUST_16_PI426249100	3879.37	3798.33	3662.84	30.596	58.9215	47.2425	85.5952	11.7525	11.73	11.7414	4.75433	5.81553	5.46081	6.24042	P	P	P	P	P	P	P	coding	NM_018953_Exon2+	NM_018953	HOX cluster	1081	chr12	+	54428061	54429142	NR_003084,NM_018953,	TGACTCTGGGTCCTTCCTGAAACTATATTTTGTCATATCAAATAAAGAGAGAACAGGACT
CUST_84_PI426249100	12.1168	23.5273	28.7357	36.0913	7.18925	19.1115	24.8043	3.7772	4.80919	5.06722	5.00225	2.69383	4.09171	4.36901	A	A	P	P	A	P	P	coding	NM_006896_Exon1-	NM_006896	HOX cluster	511	chr7	-	27195785	27196296	NM_006896,	TATTATGTGAACGCGCTTTTTAGCAAATATACGGCGGGGGCTTCTCTGTTCCAAAATGCC
ASHG19A3H0000565	23.5478	19.3964	21.8078	33.1074	30.2308	29.9824	43.5873	4.72526	4.56808	4.68281	4.86825	4.81095	4.77801	5.23023	A	P	P	P	P	P	P	coding	NM_004503_Exon1-	NM_004503	HOX cluster	512	chr12	-	54422193	54422705	uc.343-,	CCCTGCTCAGAACTAAAATCCTGAGCGATTGAGGTCTGTGTGTTATGTCCTAAGGTGTTT
ASHG19A3H0000549	19.8605	12.6621	13.0917	14.9048	15.302	15.0545	15.6896	4.47863	4.04704	3.978	3.64204	3.77698	3.7108	3.64019	A	P	A	A	P	P	P	coding	NM_152739_intron2+	NM_152739	HOX cluster	1035	chr7	+	27203460	27204496		AATGGAACCCTGGCAGACAGACGCACAGACAGTCACTTAAAATTGCACGCAGTAAAACTT
ASHG19A3H0000623	3228.35	2873.46	2625.67	3007.97	847.036	2840.56	1113.29	11.5009	11.3308	11.2647	11.6574	9.83148	11.5854	10.1414	P	P	P	P	P	P	P	coding	NM_153631_Exon4+	NM_153631	HOX cluster	2530	chr7	+	27145809	27148339		AATTTATAAAATTGCAGTTTTATTACAAAGATACCGATCTCCTTGCTCTCTCCCCCTCCC
CUST_51_PI426247286	238.16	133.153	210.362	276.48	113.546	109.205	115.201	7.93337	7.14192	7.79701	8.0708	6.79239	6.70101	6.68924	P	P	P	P	P	P	P	coding	NM_153715_intron2-	NM_153715	HOX cluster	7471	chr7	-	27211792	27219264	NM_018951,	AAATGTCAGCCAGAAAGGGCTATCTGCTCCCTTCGCCAAATTATCCCACAACAATGTCAT
ASHG19A3H0000624	73.1538	41.8348	80.4797	142.358	71.3165	42.3537	44.0006	6.32644	5.57056	6.49116	7.05947	6.09764	5.29707	5.24366	P	P	P	P	P	P	P	coding	NM_153631_Exon3+	NM_153631	HOX cluster	646	chr7	+	27149733	27150379		TGGAGCTGCTGGTTTTCTGCTTTGTGTTTTGTCGAGACTCTTTCATCCAGGGGAAGATTT
CUST_51_PI426249100	1292.31	1284.08	1251.08	40.6097	40.3112	43.0978	54.2502	10.2095	10.2013	10.2161	5.17674	5.24109	5.32019	5.55727	P	P	P	P	P	P	P	coding	NM_021192_Exon2+	NM_021192	HOX cluster	680	chr2	+	176973634	176974314	NM_021192,	CTTCCTCTTCGGTGAATGCAGGTTATTTAAACTTTGGGAAATGTACTTTTAGTCTGTCAT
CUST_65_PI426249100	290.776	308.529	296.892	487.077	297.95	211.207	339.94	8.19609	8.2735	8.26884	8.94547	8.2521	7.6969	8.32845	P	P	P	P	P	P	P	coding	NM_153620_Exon2-	NM_153620	HOX cluster	95	chr7	-	27134879	27134974	NM_153620,NM_005522,	CATCTTCTCCAGCGCAGACTTTTGACTGGATGAAAGTCAAAAGAAACCCTCCCAAAACAG
ASHG19A3H0000633	22.5841	14.243	17.8049	30.4464	24.6598	21.9715	39.8408	4.66437	4.18646	4.40281	4.74617	4.5018	4.30663	5.09211	A	P	P	P	P	P	P	coding	NM_019102_Exon1+	NM_019102	HOX cluster	623	chr7	+	27182664	27183287		AATTGCTCGCTCACGGAACTATGATCTCCATAATTATGCAACTGGTAGTCCGGGCCATTT
ASHG19A3A048656	9.3223	8.81445	9.27559	21.6173	3134.64	17.0057	17.5764	3.42485	3.63415	3.52018	4.21929	11.7624	3.90542	3.82192	A	A	A	P	P	P	P	coding	NM_017410	HOXC13	RefSeq_coding	2435	chr12	+	54332575	54340327		AAGTGGAGTTTTTAAAAAGCTCCAGCAGATCATGTCATGACGACTTCGCTGCTCCTGCAT	3229	Hs.118608	GO:0003702|GO:0005515|GO:0043565|GO:0003700|GO:0009653|GO:0009952|GO:0001942|GO:0007275|GO:0006355|GO:0043587|GO:0006351|GO:0005634	NP_059106	Homeobox C13
CUST_28_PI426249100	13.2289	7.88834	7.57193	17.5063	27.6244	30.1887	32.0726	3.90364	3.51777	3.24728	3.89653	4.67716	4.78944	4.76364	A	A	A	P	P	P	P	coding	NM_002146_Exon1-	NM_002146	HOX cluster	612	chr17	-	46651198	46651810	NM_002146,	TGAAAACTTTTTTCTCTCAGTTTGGAAGAAGCCCTTCGTCATGAATGGGATCTGCAGAGT
ASHG19A3A032589	22.2992	10.1402	26.7884	32.9092	21.073	19.6149	19.0919	4.64344	3.78901	4.97098	4.86037	4.27422	4.13115	3.94978	A	P	P	P	P	P	P	coding	NM_006896	HOXA7	RefSeq_coding	2018	chr7	-	27193339	27196296		TATTATGTGAACGCGCTTTTTAGCAAATATACGGCGGGGGCTTCTCTGTTCCAAAATGCC	3204	Hs.610216	GO:0043565|GO:0003700|GO:0008134|GO:0016564|GO:0001525|GO:0009952|GO:0048704|GO:0007275|GO:0001953|GO:0045617|GO:0002686|GO:0045656|GO:0000122|GO:0045944|GO:0006355|GO:0005634	NP_008827	Homeobox A7
CUST_12_PI426249100	108.29	110.317	104.274	23.361	29.6194	20.8689	24.5237	6.86475	6.88569	6.84344	4.34182	4.78142	4.22649	4.35165	P	P	P	P	P	P	P	coding	NM_004503_Exon1+	NM_004503	HOX cluster	512	chr12	+	54422193	54422705	uc.343+,NM_153693,NM_004503,	AAACACCTTAGGACATAACACACAGACCTCAATCGCTCAGGATTTTAGTTCTGAGCAGGG
ASHG19A3H0000578	31.7708	28.6913	26.7378	50.8007	55.7661	45.3297	54.7362	5.1476	5.06958	4.96804	5.52247	5.73128	5.39818	5.57127	P	P	P	P	P	P	P	coding	NM_002146_Exon4+	NM_002146	HOX cluster	2311	chr17	+	46626232	46628543	nc-HOXB2-164+,	TTGACAGACAACCCTTTTAGGTAAGGAAAAAAGTAACTACTGAAGAACAAAGAAAGTTCC
ASHG19A3H0000509	38609.2	30773.3	38546.5	16634.4	34802.4	35159.5	34702	14.9894	14.7055	15.0625	14.1973	15.2659	15.278	15.1793	P	P	P	P	P	P	P	coding	NM_018953_intron1-	NM_018953	HOX cluster	700	chr12	-	54427360	54428061		AACTCCCTCCCTCTCCCCCAAAAATTGAATATTGCCTTTTATACACGTTTTGTTCCTATG
CUST_34_PI426249100	44.8226	38.3475	46.3285	28.7934	18.1544	19.9729	20.8389	5.629	5.45547	5.72694	4.66392	4.04267	4.15817	4.08903	P	P	P	P	P	P	P	coding	NM_018952_Exon3-	NM_018952	HOX cluster	493	chr17	-	46675097	46675590	NM_018952,	AAGAGCAGAAGTGCTCCACTCCGGTCTACCCGTGGATGCAGCGGATGAATTCGTGCAACA
CUST_75_PI426249100	33.3131	30.7299	28.2588	38.3344	18.0037	36.4643	22.8006	5.21636	5.15837	5.0434	5.09198	4.02959	5.07216	4.23319	P	P	P	P	P	P	P	coding	NM_153631_Exon2-	NM_153631	HOX cluster	84	chr7	-	27162177	27162261	NM_153631,	ATTCCCTGAGCGCCTGGAGTTGGAGACAATTCCTGGTTCAGAATTTAAACATCTTTCTAG
ASHG19A3H0000585	20.4708	7.90186	25.3601	19.8976	14.8166	16.0251	20.9879	4.52325	3.51919	4.89056	4.09398	3.72226	3.81123	4.09922	A	P	P	P	A	P	P	coding	NM_002147_Exon1+	NM_002147	HOX cluster	621	chr17	+	46670482	46671103	uc.416+,	CATAATTTAGCAACTGATAGTCCGGGCCATTTGGATAACGCCCCGAGAAGGAGTTTACAA
ASHG19A3H0000555	19.3295	9.30612	14.6422	5	17.5696	22.8096	26.1366	4.44155	3.69129	4.13309	2.32974	3.99381	4.36555	4.44445	A	P	A	P	P	P	A	coding	NM_017410_Exon2-	NM_017410	HOX cluster	1544	chr12	-	54338783	54340327		AAAAGCCTATTCCTGATGAACATTTCAAAAGAACACTGTTTTGTAATGCACCAGTGGGAA
ASHG19A3H0000544	781.753	780.77	711.717	718.723	698.372	697.525	753.213	9.52418	9.5226	9.45002	9.5339	9.54759	9.51277	9.54838	P	P	P	P	P	P	P	coding	NM_153631_intron2+	NM_153631	HOX cluster	4242	chr7	+	27162261	27166504	ENST00000297027,	TGTGGCGCACTCATTGCTCGAAATGTTCCAGTCTACAAATGGTCCGAAGATGGTGATTTA
CUST_19_PI426249100	13.7997	16.3018	18.4306	11.709	16.0467	21.2993	25.4098	3.96163	4.35148	4.45288	3.25415	3.84819	4.25727	4.40421	A	A	P	P	P	P	A	coding	NM_014620_Exon3+	NM_014620	HOX cluster	445	chr12	+	54447700	54448145	uc.345+,NM_153633,NM_014620,	AAGAATATTCGCAAAATAGCTACATCCCTGAACACAGTCCGGAATATTACGGCCGGACCA
ASHG19A3A032585	34.2236	20.3616	23.0375	44.826	38.5628	28.3728	39.1323	5.25546	4.63003	4.75633	5.3308	5.17718	4.69373	5.0629	A	P	P	P	P	P	P	coding	NM_153631	HOXA3	RefSeq_coding	3396	chr7	-	27145809	27166639		ATTCCCTGAGCGCCTGGAGTTGGAGACAATTCCTGGTTCAGAATTTAAACATCTTTCTAG	3200	Hs.659337	GO:0043565|GO:0003700|GO:0030528|GO:0001525|GO:0009952|GO:0001974|GO:0051216|GO:0048704|GO:0021615|GO:0007275|GO:0048645|GO:0060017|GO:0008284|GO:0006355|GO:0010159|GO:0048538|GO:0030878|GO:0005730|GO:0005634	NP_705895	Homeobox A3
CUST_91_PI426249100	386.157	386.296	441.347	370.861	466.304	309.011	560.898	8.5897	8.58312	8.8038	8.52061	8.93266	8.27877	9.10595	P	P	P	P	P	P	P	coding	NM_005523_Exon1-	NM_005523	HOX cluster	781	chr7	-	27224054	27224835	NM_005523,	TATTTGCCAAGTTGTACTTACTACGTCTCGGGTCCAGATTTCTCCAGCCTCCCTTCTTTT
ASHG19A3H0000589	4664.12	4097.89	4538.78	3127.89	2422.19	181667	3175.89	12.0261	11.8448	12.0483	11.7169	11.3792	17.6031	11.6876	P	P	P	P	P	A	P	coding	NM_018952_Exon1+	NM_018952	HOX cluster	111	chr17	+	46682223	46682334		CCCCCTCTCTCGTCCTCTCTCTCTTTTGCTCTATCGAGCTGATACTGAAGTACAAAAATA
CUST_37_PI426247286	32.2811	52.4133	60.714	112.563	39.2483	89.0988	66.9599	5.16883	5.87095	6.09779	6.70457	5.20335	6.39622	5.87318	P	P	P	P	P	P	P	coding	NM_153620_intron3-	NM_153620	HOX cluster	464	chr7	-	27134414	27134879		GGAATCTCAAGTCGATTTAAAAATTTTTACATTTCCGTCTCATGGCTTCCCACTTTGCCC
CUST_52_PI426247286	159.316	121.071	156.739	202.407	330.456	200.382	359.485	7.38641	7.0111	7.39918	7.59149	8.40762	7.61671	8.41043	P	P	P	P	P	P	P	coding	NM_005523_intron2-	NM_005523	HOX cluster	1406	chr7	-	27222647	27224054		CCTCCTTCTGCCCAACTGCATGTTATTCACAATTGTTATTCAATCTGTCAAAAGCGATTT
ASHG19A3H0000538	16.8896	16.3786	24.7176	37.2482	30.3974	32.7796	23.5722	4.24061	4.35928	4.85335	5.04754	4.82062	4.90929	4.28601	A	A	M	P	P	P	P	coding	NM_153620_intron2+	NM_153620	HOX cluster	202	chr7	+	27134974	27135177		GAGAGGGGACAAGGAGTTATTATACGTAGCCAGGGCCAGGCTCTGGTGCTCCTGTCCATA
ASHG19A3H0000558	14.2767	20.4455	17.9857	54.8715	18.2189	43.6459	23.0453	4.01314	4.63672	4.41787	5.632	4.04837	5.34039	4.25188	A	A	P	P	P	P	P	coding	NM_014212_Exon1-	NM_014212	HOX cluster	798	chr12	-	54366909	54367707		ACCGCAGTAGGCGTTGTCGAAGAAACGGTCGAAGGCTTGAGGCAGGACGCTGTTCTTGTT
CUST_11_PI426249100	2832.8	2761.99	2871.74	556.462	595.561	527.896	742.58	11.3109	11.2777	11.3961	9.1503	9.30144	9.08595	9.52557	P	P	P	P	P	P	P	coding	NM_153693_Exon1+	NM_153693	HOX cluster	557	chr12	+	54410641	54411198	NR_003084,NM_153693,NM_014620,	TTGAATTTATATAAAGTATATGTGTGTGTGTGTGGAGCTGAGACAGGCTCGGCAGCGGCA
CUST_30_PI426247286	55.0149	39.4426	54.3303	47.9405	16.1	13.0174	23.2764	5.9177	5.49217	5.94312	5.42744	3.85383	3.46839	4.26795	P	P	P	P	P	A	P	coding	NM_002148_intron1+	NM_002148	HOX cluster	1374	chr2	+	176982306	176983681		CCTTCCAAGGCCCACTTCATGTGAGTAATGTTTAATACTAGCATTTTCCAAAGCGGCCTG
ASHG19A3H0000559	308.169	320.464	276.539	28.2224	49.7495	26.2966	47.0381	8.27917	8.32639	8.16817	4.63126	5.55774	4.57868	5.34555	P	P	P	P	P	P	P	coding	NM_014212_Exon2-	NM_014212	HOX cluster	1237	chr12	-	54368964	54370201		TTCCCTCCAGGTGGAAAGAAACGCTTGGGAAATTTATTTACAAAAATCCAGGCCCCAGCA
CUST_59_PI426249100	301.998	306.936	284.447	175.428	173.359	175.694	191.847	8.25201	8.26636	8.20949	7.37585	7.43115	7.4186	7.46208	P	P	P	P	P	P	P	coding	NM_014621_Exon2+	NM_014621	HOX cluster	612	chr2	+	177017335	177017947	NM_014621,	GTATATTATATGGCAGGAGCTACTGAGAACATAAAATCTTGGCGAGTCATTAAACTTATG
CUST_71_PI426249100	978.182	918.516	904.155	606.013	646.391	536.904	679.717	9.83237	9.74608	9.77753	9.27547	9.4275	9.11161	9.39287	P	P	P	P	P	P	P	coding	NM_153631_Exon3-	NM_153631	HOX cluster	646	chr7	-	27149733	27150379	NM_153632,NM_153631,NM_030661,	AAATCTTCCCCTGGATGAAAGAGTCTCGACAAAACACAAAGCAGAAAACCAGCAGCTCCA
ASHG19A3H0000620	61.0799	52.5883	68.9767	44.6652	59.5694	32.8471	68.0382	6.05929	5.87531	6.27141	5.32558	5.83464	4.91158	5.89695	P	P	P	P	P	P	P	coding	NM_153620_Exon1+	NM_153620	HOX cluster	448	chr7	+	27135177	27135625		GTCTGCTTCCTGATTTAACGCGTAGGGGCTGTAAGGCGCACTGAAGTTCTGTGAGCCATA
ASHG19A3A008520	8282.37	8522.67	8178.56	30.963	30.4286	35.54	37.0429	12.8239	12.8809	12.8684	4.77067	4.8225	5.03219	4.98379	P	P	P	P	P	P	P	coding	NM_006361	HOXB13	RefSeq_coding	3047	chr17	-	46802128	46806111		GCTATCAGAAACTTAAACTTGAGGATTTTCTCTGTTTTTCACTCGCAATAAATTCAGAGC	10481	Hs.66731	GO:0043565|GO:0003700|GO:0030528|GO:0001525|GO:0008544|GO:0060743|GO:0002009|GO:0007275|GO:0060527|GO:0040008|GO:0006355|GO:0009611|GO:0005634|GO:0005667	NP_006352	Homeobox B13
ASHG19A3A016635	63.065	44.169	60.8982	69.2268	89.8134	38.1455	77.6606	6.10759	5.64167	6.10317	5.98243	6.43806	5.13892	6.09552	P	P	P	P	P	P	P	coding	NM_014621	HOXD4	RefSeq_coding	1298	chr2	+	177016112	177017947		ATTAATGGTCATGAGTTCGTATATGGTGAACTCCAAGTATGTGGACCCCAAGTTCCCTCC	3233	Hs.591609	GO:0043565|GO:0003700|GO:0030528|GO:0007275|GO:0006355|GO:0006351|GO:0005634	NP_055436	Homeobox D4
ASHG19A3H0000534	44.7417	31.3094	43.2864	42.426	94.2074	96.2737	123.876	5.62592	5.18518	5.632	5.24293	6.51585	6.5138	6.79817	P	P	P	P	P	P	P	coding	NM_006898_intron1-	NM_006898	HOX cluster	4861	chr2	-	177028896	177033758		AGCTATTTCAGAGTATTTCAAAGTCCCAGCTATTCTGCAGTATTAATAGCTATTTCAGAG
ASHG19A3H0000628	195.728	198.924	195.24	169.95	151.865	157.109	170.671	7.67393	7.68588	7.70053	7.33055	7.23083	7.2549	7.27971	P	P	P	P	P	P	P	coding	NM_153631_Exon2+	NM_153631	HOX cluster	84	chr7	+	27162177	27162261	uc003syl.2,ENST00000297027,	CTAGAAAGATGTTTAAATTCTGAACCAGGAATTGTCTCCAACTCCAGGCGCTCAGGGAAT
CUST_5_PI426249100	65.2492	43.227	77.6991	149.461	41.8644	42.3447	43.9569	6.15809	5.61441	6.43835	7.1303	5.29886	5.29665	5.24223	P	P	P	P	P	P	P	coding	NM_014212_Exon1+	NM_014212	HOX cluster	798	chr12	+	54366909	54367707	NM_014212,	AACAAGAACAGCGTCCTGCCTCAAGCCTTCGACCGTTTCTTCGACAACGCCTACTGCGGT
CUST_16_PI426247286	8211.62	7661.45	8446.85	6997.51	7651.83	4724.01	8352.64	12.808	12.7193	12.9105	12.9035	13.0744	12.3201	13.095	P	P	P	P	P	P	P	coding	NM_002146_intron2-	NM_002146	HOX cluster	18217	chr17	-	46632980	46651198		CTCTTCCTCCCTGTCCCTCCAATCTAGATTTAAATTTTTACCTGTTCTTTAAGGAAAAAA
CUST_21_PI426247286	257.149	254.555	255.824	182.605	292.007	301.32	379.693	8.03364	8.01334	8.05717	7.4417	8.22179	8.24275	8.49706	P	P	P	P	P	P	P	coding	NM_018952_intron2-	NM_018952	HOX cluster	245	chr17	-	46681977	46682223		CCAGAACTTACTCCATTTTCTATGCAAATGTCAGAAAAATGAAACACCCTCTCTCCCAAG
ASHG19A3H0000612	63.5204	50.3725	62.3312	49.5526	66.3466	79.0916	72.0817	6.11567	5.81851	6.13377	5.48146	5.99418	6.22147	5.98112	P	P	P	P	P	P	P	coding	NM_014621_Exon2-	NM_014621	HOX cluster	612	chr2	-	177017335	177017947		CATAAGTTTAATGACTCGCCAAGATTTTATGTTCTCAGTAGCTCCTGCCATATAATATAC
CUST_29_PI426249100	3227.02	3194.42	3113.93	2115.67	1836.72	1875.54	2049.63	11.5005	11.4905	11.5092	11.1491	10.9737	10.9863	11.0455	P	P	P	P	P	P	P	coding	NM_024015_Exon2-	NM_024015	HOX cluster	1513	chr17	-	46652869	46654382	NM_024015,	AATATCTGTGTGCTGTACAGAGTGACAATAGAAATAAATGTTTGGTTTCTTGTGACCAGC
CUST_63_PI426249100	161.003	147.483	151.919	343.987	308.15	318.155	334.641	7.40448	7.27915	7.35926	8.40762	8.30045	8.32321	8.3062	P	P	P	P	P	P	P	coding	NM_024501_Exon2+	NM_024501	HOX cluster	1096	chr2	+	177054539	177055635	NM_024501,	TCGCTGTTTAGTTACTAGATGAACAAATCCACAGAATGGGTAAAGAGTAGAATCTGAACT
ASHG19A3H0000600	52.6496	62.4279	45.0993	54.1427	42.4033	62.7214	607.947	5.85496	6.10611	5.6906	5.61313	5.31771	5.88337	9.21842	P	P	P	P	P	P	P	coding	NM_000523_Exon2-	NM_000523	HOX cluster	1459	chr2	-	176959207	176960666	nc-HOXD12-3+,	AAGAGTTCTGTTTATTGGCATCTCCCTAGGAGTAAAAAGTGATTTTTAAATGTCTGAAGC
CUST_40_PI426249100	20.1713	17.7825	18.9156	21.2006	19.0946	14.2879	29.2671	4.50025	4.46036	4.48991	4.18958	4.12697	3.62573	4.62299	A	P	P	P	P	P	P	coding	NM_024016_Exon1-	NM_024016	HOX cluster	659	chr17	-	46691642	46692301	NM_024016,	AAATGAGCTCTTATTTCGTCAACTCACTGTTCTCCAAATACAAAACCGGGGAGTCCCTGC
ASHG19A3H0000551	12.7291	13.1872	18.5526	29.4596	24.5608	24.8224	20.514	3.85131	4.09452	4.46216	4.69716	4.49708	4.49306	4.06402	A	A	P	P	P	P	P	coding	NM_153715_intron2+	NM_153715	HOX cluster	7471	chr7	+	27211792	27219264		ATGACATTGTTGTGGGATAATTTGGCGAAGGGAGCAGATAGCCCTTTCTGGCTGACATTT
CUST_33_PI426247286	14.6371	18.8857	19.6261	49.3909	20.8267	45.9848	13.8392	4.04704	4.53517	4.54372	5.47754	4.2561	5.42013	3.42603	A	A	P	A	P	P	P	coding	NM_014621_intron1+	NM_014621	HOX cluster	540	chr2	+	177016794	177017335		CAGAAGAAGGAGCACATTTGGGGATCCCGCAAGCCTGGGGTATGTGGGTGTGTTTGAGGA
ASHG19A3H0000562	68.771	67.3439	216.649	111.73	93.6618	82.0925	100.67	6.23428	6.20816	7.83443	6.695	6.50632	6.27397	6.47752	P	P	P	P	P	P	P	coding	NM_022658_Exon1-	NM_022658	HOX cluster	615	chr12	-	54402889	54403504		AAACATGAGGCTGGGAGACGAGTTTTGATTTAAGTGGCCTTGTCCTTCGCTACTGTTAGT
CUST_33_PI426249100	1592.85	1534.86	1537.66	257.414	177.339	207.271	202.619	10.4943	10.446	10.502	7.9648	7.46668	7.66899	7.54561	P	P	P	P	P	P	P	coding	NM_018952_Exon4-	NM_018952	HOX cluster	936	chr17	-	46673098	46674034	NM_018952,	ATTAATTTTCTATGTGTTGTGTTTGTAGTCTTGTCTTAGCTCTGGACGTGAAATACTTCG
CUST_15_PI426247286	66.4731	62.795	71.8479	102.671	33.8323	66.6715	60.332	6.18594	6.11381	6.32849	6.57107	4.97787	5.97783	5.71408	P	P	P	P	P	P	P	coding	NM_002146_intron3-	NM_002146	HOX cluster	2897	chr17	-	46629994	46632892		GAAAAAACCCTATTGATGTCAGTTCCCTTTTCAGTTCCTAAGATGGATTCGAGCCCCAGT
ASHG19A3H0000639	8.18556	9.60918	66.2145	18.503	18.6353	14.6351	27.7743	3.23973	3.72881	6.21269	3.98343	4.08961	3.66524	4.53611	A	A	P	P	P	P	P	coding	NM_152739_Exon1+	NM_152739	HOX cluster	653	chr7	+	27204496	27205149		CTCTCATTCTCAGCATTGTTTTCAGAGAAGGCGCCTTCGCTGGGTTGTTTTTCTCTATCA
CUST_3_PI426249100	17.3221	30.6734	21.3181	25.4088	38.7943	18.5537	31.5754	4.27471	5.1557	4.65227	4.46875	5.18643	4.04385	4.73941	P	P	P	P	P	P	P	coding	NM_173860_Exon1+	NM_173860	HOX cluster	610	chr12	+	54348713	54349323	NM_173860,	TAATCTCCTGAATCCCGGGTTTGTGGGGCCGCTGGTAAACATCCACACGGGAGACACCTT
CUST_47_PI426247286	620.607	578.249	591.16	1126.05	1145.58	1102.91	1378.37	9.22226	9.11477	9.19087	10.2223	10.2824	10.2084	10.4663	P	P	P	P	P	P	P	coding	NM_024014_intron2-	NM_024014	HOX cluster	1389	chr7	-	27185536	27186926		GAAAACATCTCGCTTGGTATGAAATAATCTCCCATTCAGTATGCTTTGGGCCCCAGACAT
ASHG19A3H0000616	19.7765	28.2226	34.9454	24.7879	48.7986	50.5092	58.8825	4.47226	5.04797	5.33213	4.43182	5.52804	5.55831	5.68036	P	P	P	P	P	P	P	coding	NM_024501_Exon2-	NM_024501	HOX cluster	1096	chr2	-	177054539	177055635	Z49995,	AGTTCAGATTCTACTCTTTACCCATTCTGTGGATTTGTTCATCTAGTAACTAAACAGCGA
CUST_9_PI426249100	215.507	195.482	218.508	178.374	197.444	172.22	214.101	7.79714	7.6607	7.846	7.40405	7.62851	7.38991	7.62715	P	P	P	P	P	P	P	coding	NM_022658_Exon1+	NM_022658	HOX cluster	615	chr12	+	54402889	54403504	NM_022658,	ACTAACAGTAGCGAAGGACAAGGCCACTTAAATCAAAACTCGTCTCCCAGCCTCATGTTT
CUST_13_PI426247286	43.5645	42.7421	37.5253	58.1127	72.6677	51.9641	69.9343	5.58987	5.60188	5.43599	5.71631	6.12425	5.60055	5.93779	P	P	P	P	P	P	P	coding	NM_002145_intron2-	NM_002145	HOX cluster	772	chr17	-	46621109	46621882		AGAAGCAGAAAAGATTCGGTCCTTTCTGCCCCAACTCTAGGAGAAGAGGAAGAATTCAGA
CUST_35_PI426247286	51.5628	54.2826	52.5482	71.5189	27.5935	58.9194	31.2825	5.82531	5.91421	5.89655	6.03263	4.67468	5.78626	4.72381	P	P	P	P	P	P	P	coding	NM_006898_intron2+	NM_006898	HOX cluster	1860	chr2	+	177034383	177036244		TAGTAAAAGCCAGTGTTGAGGCTGCTGCTCCTAGCACTGTGAATACTCAAAATGCTTCCA
ASHG19A3H0000536	8.15762	19.4485	26.011	29.1029	5	23.4896	28.2022	3.23305	4.57236	4.93005	4.67945	2.33128	4.40967	4.56167	A	A	P	P	A	P	P	coding	NM_024501_intron1-	NM_024501	HOX cluster	353	chr2	-	177054185	177054539		CCTAGGAACAGAATTTGTACCAGGAGAAGTTCCACGGAGAGCTCCTTCCTGAAATTTTCT
ASHG19A3A048657	21.2776	20.3794	35.2992	27.6968	35.4619	28.8853	44.1355	4.57411	4.63136	5.34745	4.60472	5.05184	4.72128	5.24887	A	P	P	P	P	P	P	coding	NM_173860	HOXC12	RefSeq_coding	849	chr12	+	54348713	54350348		AGAACCGGAGAATGAAAAAGAAAAGACTTCTGTTGAGGGAGCAAGCTCTCTCCTTCTTTT	3228	Hs.381267	GO:0043565|GO:0003700|GO:0030528|GO:0007275|GO:0006355|GO:0005634	NP_776272	Homeobox C12
ASHG19A3A008506	3303.8	3386.16	3652.35	2152.06	2410.46	2303.29	2226.11	11.5341	11.5712	11.7371	11.1783	11.3723	11.2807	11.1632	P	P	P	P	P	P	P	coding	NM_024015	HOXB4	RefSeq_coding	2042	chr17	-	46652869	46655743		TTTGATCAACTCAAACTATGTCGACCCCAAGTTCCCTCCATGCGAGGAATATTCACAGAG	3214	Hs.664706	GO:0043565|GO:0003700|GO:0016564|GO:0009952|GO:0048539|GO:0008283|GO:0060216|GO:0048704|GO:0002011|GO:0007275|GO:0000122|GO:0006355|GO:0048103|GO:0048536|GO:0006351|GO:0005634	NP_076920	Homeobox B4
ASHG19A3H0000513	76.9989	55.567	71.0712	62.078	107.564	113.509	128.85	6.39895	5.94935	6.31171	5.81818	6.71041	6.7552	6.85364	P	P	P	P	P	P	P	coding	NM_002145_intron2+	NM_002145	HOX cluster	772	chr17	+	46621109	46621882		TCTGAATTCTTCCTCTTCTCCTAGAGTTGGGGCAGAAAGGACCGAATCTTTTCTGCTTCT
ASHG19A3H0000501	32.2986	27.7082	31.3949	20.2056	18.6341	32.9686	30.1498	5.16988	5.02499	5.18665	4.12031	4.08952	4.91827	4.66512	P	P	P	P	P	P	P	coding	NM_017410_intron1-	NM_017410	HOX cluster	5356	chr12	-	54333426	54338783		AACGGGGCCAGAGGATTGCACTGCATAGTGAAGCTCCCTAATGCTTTTCATTTCTGTTAT
CUST_53_PI426247286	290.958	294.765	334.25	487.497	438.772	445.764	417.861	8.19745	8.20642	8.43352	8.94747	8.836	8.82938	8.64251	P	P	P	P	P	P	P	coding	NM_000522_intron2-	NM_000522	HOX cluster	712	chr7	-	27238061	27238774		TTTCATTTCAGTTCAGAACTAACTACCTTCCCCACTGACCCTCTAGGCTTTAGCAGAAGA
ASHG19A3H0000598	289.18	237.566	291.986	114.819	346.097	382.397	422.981	8.18832	7.92416	8.24648	6.73141	8.47351	8.59085	8.65832	P	P	P	P	P	P	P	coding	NM_006361_Exon1+	NM_006361	HOX cluster	757	chr17	+	46805354	46806111		CTGCAAATGCTGCCTTCCAAAAGGGACCTGGTGGGTTCTGTTCTCCCTGGCAACACATCT
ASHG19A3H0000579	40.7413	38.859	49.4642	85.1098	70.5319	74.8793	96.8943	5.49083	5.47303	5.81649	6.29789	6.08197	6.14445	6.42195	P	P	P	P	P	P	P	coding	NM_002146_Exon3+	NM_002146	HOX cluster	606	chr17	+	46629388	46629994		GGAGTTGTTTTTCAGCTTGGACGTTTGCCTCGACTCTTTCATCCAGGGGAATATCTGTTT
ASHG19A3H0000557	74.8091	65.4814	80.927	66.8378	97.6818	95.0196	96.1744	6.35673	6.17142	6.49832	5.92662	6.56424	6.49482	6.41065	P	P	P	P	P	P	P	coding	NM_173860_Exon2-	NM_173860	HOX cluster	237	chr12	-	54350111	54350348		AAAAGAAGGAGAGAGCTTGCTCCCTCAACAGAAGTCTTTTCTTTTTCATTCTCCGGTTCT
ASHG19A3H0000586	70.7326	66.3053	60.5482	22.5267	21.8807	21.5677	19.4361	6.27882	6.18734	6.09327	4.28396	4.32576	4.27831	3.97881	P	P	P	P	P	P	P	coding	NM_018952_Exon4+	NM_018952	HOX cluster	936	chr17	+	46673098	46674034		CGAAGTATTTCACGTCCAGAGCTAAGACAAGACTACAAACACAACACATAGAAAATTAAT
ASHG19A3H0000543	11.8959	12.8692	7.43143	18.6596	15.2183	16.4256	17.7073	3.7541	4.06746	3.22645	3.99587	3.76738	3.85231	3.83333	A	A	A	P	P	P	P	coding	NM_153631_intron3+	NM_153631	HOX cluster	11797	chr7	+	27150379	27162177		GTGAGGGCTCCGCGCAAATCCATCTTACTCTCAATAGCTAAGTGACATGAAAGCCATAAA
CUST_68_PI426249100	449.597	425.663	426.438	1324.55	1173.47	1211.56	1281.92	8.79659	8.71329	8.7581	10.469	10.3206	10.3428	10.3609	P	P	P	P	P	P	P	coding	NM_006735_Exon2-	NM_006735	HOX cluster	1111	chr7	-	27139973	27141084	NM_006735,	CCTGAGAGCAGTATGAGGCCTGCAAGAAAGTGATCATATAATTGTATCTTCACTTTCTTT
CUST_23_PI426247286	42.2032	67.5478	59.0061	171.624	126.405	113.466	34.4017	5.54343	6.21292	6.05859	7.34385	6.9577	6.75465	4.87043	P	P	P	P	M	P	P	coding	NM_024016_intron2-	NM_024016	HOX cluster	770	chr17	-	46690871	46691642		AGTTTATGGCACTTCTAATAGATCTGAACCACCTCCTACACAACTCTGGTGCTGGTTACC
ASHG19A3H0000614	39.8794	32.4023	35.1922	51.1881	235.242	45.538	59.2419	5.46257	5.23266	5.34186	5.53438	7.89459	5.40526	5.69045	P	P	P	P	P	P	P	coding	NM_006898_Exon3-	NM_006898	HOX cluster	1582	chr2	-	177036244	177037826		ATTTGTTCCAATAGTACCAGACAATTTGAAATCAATAAACTGTGGTGAGGACTGTGGTTT
ASHG19A3H0000594	1132.69	1025.47	1101.88	1142.21	1253.15	1154.84	1224.77	10.0235	9.88729	10.0465	10.2443	10.4137	10.2756	10.2937	P	P	P	P	P	P	P	coding	NM_024017_Exon2+	NM_024017	HOX cluster	1972	chr17	+	46698525	46700497		CCAGAACCCTCCCATATAATCGACAACTGAAAACAAGCGAGACAATCACCCCCAAAGAAA
CUST_44_PI426249100	9171.69	8323.78	7549.49	26.9901	19.2005	21.5606	14.7999	12.9732	12.8497	12.7508	4.56673	4.13539	4.27786	3.53909	P	P	P	A	P	P	P	coding	NM_006361_Exon2-	NM_006361	HOX cluster	2277	chr17	-	46802128	46804405	NM_006361,	GCTATCAGAAACTTAAACTTGAGGATTTTCTCTGTTTTTCACTCGCAATAAATTCAGAGC
ASHG19A3A032586	15.7273	19.1402	13.669	23.192	20.5611	22.4476	21.7801	4.14039	4.55198	4.03864	4.33086	4.2374	4.33961	4.16483	A	A	A	P	P	P	P	coding	NM_002141	HOXA4	RefSeq_coding	1728	chr7	-	27168126	27170399		ATTAATGACCATGAGCTCGTTTTTGATAAACTCCAACTACATCGAGCCCAAGTTCCCTCC	3201	Hs.533357	GO:0043565|GO:0003700|GO:0030528|GO:0009653|GO:0009952|GO:0048704|GO:0007275|GO:0006355|GO:0005634	NP_002132	Homeobox A4
CUST_17_PI426247286	22.7199	14.7265	14.632	51.4668	48.2499	41.0015	11.1955	4.67437	4.22953	4.13236	5.54111	5.51189	5.24513	3.09471	A	P	A	A	P	P	P	coding	NM_024015_intron2-	NM_024015	HOX cluster	841	chr17	-	46654382	46655224		AACGCTGTGTTCCCTGGAAGAAAGGACTCTCTCTTTCGGGGGCAATAAAACTTTCTCTTT
ASHG19A3H0000510	5.51379	24.1613	14.4273	67.6503	48.992	54.1252	25.8645	2.80151	4.84471	4.11061	5.94493	5.53324	5.66402	4.43075	A	A	A	P	P	P	P	coding	NM_014620_intron2-	NM_014620	HOX cluster	639	chr12	-	54447060	54447700	uc.345-,	CTGGAGTGGAAAATAATTTTTCTCGCTTTGTCGTTTTTCTGCTCCATAAAGCCCTCCTAC
CUST_36_PI426247286	21.1831	16.0927	23.6925	25.5953	39.7175	38.1207	45.9906	4.56808	4.33393	4.79254	4.48259	5.2195	5.13815	5.30619	A	P	P	P	P	P	P	coding	NM_024501_intron1+	NM_024501	HOX cluster	353	chr2	+	177054185	177054539		AGAAAATTTCAGGAAGGAGCTCTCCGTGGAACTTCTCCTGGTACAAATTCTGTTCCTAGG
CUST_72_PI426249100	415.648	680.38	388.595	505.443	515.836	376.962	287.858	8.69086	9.33817	8.64203	9.00595	9.09486	8.56971	8.08323	P	P	P	P	P	P	P	coding	NM_153632_Exon2-	NM_153632	HOX cluster	162	chr7	-	27149733	27149895	NM_153632,NM_153631,NM_030661,	AAATCTTCCCCTGGATGAAAGAGTCTCGACAAAACACAAAGCAGAAAACCAGCAGCTCCA
ASHG19A3H0000590	36.3832	47.3927	31.5552	24.9926	16.1562	21.501	28.0518	5.33923	5.74033	5.19375	4.4452	3.8598	4.27205	4.55257	P	P	P	P	P	P	P	coding	NM_004502_Exon2+	NM_004502	HOX cluster	855	chr17	+	46684602	46685457		AATTGCGTTTTATTTTTCCATCCTTTAGATACACACAGAATGTAAAAGGGAGCATGGGGC
ASHG19A3A048664	95.8909	114.95	103.08	270.707	262.561	238.839	125.557	6.69977	6.93842	6.82825	8.03797	8.06859	7.88458	6.81612	P	P	P	P	P	P	P	coding	NM_018953	HOXC5	RefSeq_coding	1613	chr12	+	54426831	54429142	uc.344+,	TATAAGCAGAGCCCCAATATCCCTGCCTATAACATGCAAACTTGTGGGAACTATGGATCG	3221	Hs.549040	GO:0043565|GO:0003700|GO:0030528|GO:0009952|GO:0051216|GO:0048562|GO:0007275|GO:0006355|GO:0006351|GO:0005634	NP_705897	Homeobox C4
ASHG19A3H0000605	32.5141	20.9683	30.9173	37.5238	42.4205	58.27	49.3045	5.1798	4.66512	5.16831	5.05824	5.31854	5.76894	5.41155	A	P	P	P	P	P	P	coding	NM_002148_Exon1-	NM_002148	HOX cluster	815	chr2	-	176981491	176982306		CTATTATTGTACTCTTGGGTTTTCCCGGTGGCGTAGGTCTGACTCAGTCTAAAATATCCA
CUST_79_PI426249100	68.7272	60.7951	72.435	18.7473	35.9287	44.4881	55.1836	6.23317	6.06931	6.34017	4.00335	5.06988	5.37034	5.58444	P	P	P	P	P	P	P	coding	NM_019102_Exon2-	NM_019102	HOX cluster	709	chr7	-	27180995	27181704	NM_019102,	CGTGGAAGTGTTCCTGTCTCAATAGCTCCAAGCTGTTAAAGATATTTTTATTCAAACTAC
CUST_78_PI426249100	12.7131	14.6092	14.0649	21.2062	22.4465	24.0362	28.3362	3.84889	4.21832	4.07833	4.19063	4.36438	4.44685	4.57003	A	A	A	P	P	P	P	coding	NM_002141_Exon1-	NM_002141	HOX cluster	663	chr7	-	27169736	27170399	NM_002141,	ATTAATGACCATGAGCTCGTTTTTGATAAACTCCAACTACATCGAGCCCAAGTTCCCTCC
ASHG19A3H0000613	78.414	53.0914	68.6355	69.6937	87.5895	103.085	106.657	6.42652	5.88678	6.26511	5.99347	6.40109	6.61683	6.57156	P	P	P	P	P	P	P	coding	NM_006898_Exon2-	NM_006898	HOX cluster	625	chr2	-	177033758	177034383		GTAAGTGTCCGTAGTTTTGCTGTAGCCATAGCCTCCAAACAGTCCTGGGTTTTCATAGTA
ASHG19A3H0000588	26.2107	18.2832	25.5651	21.6594	28.9337	32.2434	30.5044	4.88387	4.496	4.90293	4.22153	4.74995	4.88533	4.68281	A	P	P	P	P	P	P	coding	NM_018952_Exon2+	NM_018952	HOX cluster	136	chr17	+	46681841	46681977		AATGGGTGGGGAGGAAGGAAGGAGTATTCAGTTTCTTCTTCAGCTTCCAGATAATATTGT
CUST_58_PI426249100	65.3613	50.3314	61.7198	84.0512	78.8584	77.294	84.8394	6.1611	5.81703	6.12094	6.28018	6.24936	6.19014	6.22798	P	P	P	P	P	P	P	coding	NM_014621_Exon1+	NM_014621	HOX cluster	682	chr2	+	177016112	177016794	NM_014621,	ATTAATGGTCATGAGTTCGTATATGGTGAACTCCAAGTATGTGGACCCCAAGTTCCCTCC
ASHG19A3A032581	33.1221	33.9686	41.4804	69.9776	62.9186	68.9776	84.997	5.20734	5.29227	5.57274	5.99881	5.91798	6.02575	6.23118	P	P	P	P	P	P	P	coding	NM_006735	HOXA2	RefSeq_coding	1791	chr7	-	27139973	27142394	uc.212-,	GATACATTTCAAAGTTCATCAATCAAGACCTCGACGCTTTCACACTCGACACTGATTCCT	3199	Hs.592177	GO:0043565|GO:0003700|GO:0030528|GO:0009952|GO:0035284|GO:0001709|GO:0009953|GO:0048704|GO:0048703|GO:0042474|GO:0008045|GO:0045665|GO:0000122|GO:0002076|GO:0045944|GO:0006355|GO:0021568|GO:0021658|GO:0007379|GO:0005730|GO:0005634	NP_006726	Homeobox A2
ASHG19A3A016632	223.887	218.575	222.001	134.972	145.153	171.893	162.874	7.84938	7.81429	7.86343	6.97753	7.16573	7.38655	7.21211	P	P	P	P	P	P	P	coding	NM_019558	HOXD8	RefSeq_coding	1879	chr2	+	176994476	176996726		TAATATTGGCGAGGACCCAGACCACTTAAATCAGAGCTCGTCTCCTTCTCAAATGTTTCC	3234	Hs.301963	GO:0043565|GO:0003700|GO:0030528|GO:0008595|GO:0009952|GO:0007275|GO:0000122|GO:0006355|GO:0048705|GO:0006351|GO:0005634	NP_062458	Homeobox D8
CUST_45_PI426249100	171.355	153.19	141.987	99.0525	81.2241	73.6432	20.4483	7.48831	7.33123	7.26863	6.51957	6.29426	6.12365	4.05926	P	P	P	P	P	P	P	coding	NM_006361_Exon1-	NM_006361	HOX cluster	757	chr17	-	46805354	46806111	NM_006361,	AGATGTGTTGCCAGGGAGAACAGAACCCACCAGGTCCCTTTTGGAAGGCAGCATTTGCAG
CUST_24_PI426249100	290.9	420.587	279.188	4432.39	4386.66	4372.26	3927.22	8.19695	8.69884	8.18253	12.2353	12.2373	12.2142	11.9806	P	P	P	P	P	P	P	coding	NM_002145_Exon1-	NM_002145	HOX cluster	511	chr17	-	46621882	46622393	NM_002145,	GGAGACATTTCAAACTTCATCAATCAAGGAGTCGACATTAATTCCTCCTCCTCCTCCTTT
ASHG19A3H0000574	207.544	218.059	231.665	462.937	388.655	380.753	516.003	7.7474	7.81146	7.9195	8.86503	8.64274	8.58463	8.96552	P	P	P	P	P	P	P	coding	NM_002144_Exon2+	NM_002144	HOX cluster	431	chr17	+	46606806	46607237		GCTTCTTCTGCTTCATTCGTCGGTTCTGGAACCAAATCTTGACCTGTGTTTCATTGAGCT
ASHG19A3H0000577	394.654	350.599	338.988	19.1133	22.4763	22.456	21.183	8.61574	8.44729	8.45025	4.0342	4.36724	4.34046	4.11732	P	P	P	P	P	P	P	coding	NM_002145_Exon1+	NM_002145	HOX cluster	511	chr17	+	46621882	46622393		AAAGGAGGAGGAGGAGGAATTAATGTCGACTCCTTGATTGATGAAGTTTGAAATGTCTCC
ASHG19A3H0000540	251.824	244.162	259.643	370.203	335.772	344.01	393.253	8.00403	7.95996	8.07718	8.5167	8.42988	8.42788	8.54708	P	P	P	P	P	P	P	coding	NM_153632_intron3+	NM_153632	HOX cluster	1393	chr7	+	27148339	27149733		AAGTAGGAACTAGGTGCTATCCTCTCTCCTGGTGGGTAAAACAGTGATACTCCCTCATTT
ASHG19A3A008519	69.7119	69.1854	62.0716	90.0877	320.33	91.3394	88.3611	6.25523	6.2452	6.12845	6.38563	8.35864	6.43513	6.28519	P	P	P	P	P	P	P	coding	NM_032391	PRAC	RefSeq_coding	403	chr17	-	46799091	46799882		TTCTCAGATCAAGGACCGGCCCATCTTACTACCTCCAAGAGTGCTTTTCTCTCTAATAAG	84366	Hs.116467	GO:0005634	NP_115767	Prostate cancer susceptibility candidate
CUST_54_PI426249100	95.1469	92.7296	91.5143	214.175	188.323	178.733	260.167	6.6888	6.65256	6.66257	7.67495	7.55496	7.44511	7.92674	P	P	P	P	P	P	P	coding	NM_014213_Exon1+	NM_014213	HOX cluster	901	chr2	+	176987412	176988313	NM_014213,	ATGTCTTCCAGTGGCACCCTCAGCAACTACTACGTGGACTCGCTTATAGGCCATGAGGGC
ASHG19A3H0000637	278.205	255.679	262.711	199.054	296.337	300.846	301.999	8.13111	8.01857	8.09381	7.56695	8.24432	8.24157	8.15539	P	P	P	P	P	P	P	coding	NM_006896_Exon1+	NM_006896	HOX cluster	511	chr7	+	27195785	27196296		GGCATTTTGGAACAGAGAAGCCCCCGCCGTATATTTGCTAAAAAGCGCGTTCACATAATA
ASHG19A3H0000621	176.738	190.536	195.416	142.428	142.287	142.715	147.793	7.53037	7.62546	7.7012	7.05992	7.13289	7.10249	7.07118	P	P	P	P	P	P	P	coding	NM_006735_Exon2+	NM_006735	HOX cluster	1111	chr7	+	27139973	27141084		AAAGAAAGTGAAGATACAATTATATGATCACTTTCTTGCAGGCCTCATACTGCTCTCAGG
ASHG19A3A008511	111.035	132.406	119.959	88.5967	66.7509	69.5896	79.9532	6.89707	7.13456	7.0359	6.35883	6.00346	6.04121	6.14228	P	P	P	P	P	P	P	coding	NM_004502	HOXB7	RefSeq_coding	1377	chr17	-	46684602	46688383		TTTCTAAATATCCAGCCTCAAGTTCGGTTTTCGCTACCGGAGCCTTCCCAGAACAAACTT	3217	Hs.436181	GO:0005515|GO:0043565|GO:0003700|GO:0030528|GO:0009952|GO:0048704|GO:0007275|GO:0030099|GO:0006355|GO:0006351|GO:0005634	NP_004493	Homeobox B7
CUST_8_PI426249100	3654.8	3062.96	3004.37	45.0475	28.4243	23.8084	23.8903	11.6684	11.4298	11.4601	5.33748	4.72173	4.43294	4.30888	P	P	P	P	P	P	P	coding	NM_017409_Exon2+	NM_017409	HOX cluster	1108	chr12	+	54382952	54384060	NM_017409,	TCCCTGTCTGGGAGTTGTGTTATTTAAAGATATTCTGTATGTTGTATCTTTTGCATGTAG
ASHG19A3H0000599	87.8424	100.597	76.949	190.083	176.712	163.451	140.475	6.57511	6.76183	6.42259	7.50068	7.4619	7.31222	6.98965	P	P	P	P	P	P	P	coding	NM_000523_Exon1-	NM_000523	HOX cluster	868	chr2	-	176957531	176958399		CTGGAAAGGAAGATTTCCAAAAGTGGGACCCCTGTGGCTGGTCCTTGGTGCAGTACACCT
CUST_20_PI426249100	17339.4	16602	16378.6	3125.61	3330.13	3294.29	3550.32	13.8555	13.8133	13.8331	11.7166	11.8453	11.8023	11.8415	P	P	P	P	P	P	P	coding	NM_014620_Exon4+	NM_014620	HOX cluster	1180	chr12	+	54448633	54449813	NM_153633,NM_014620,	ATTTTAGTGTCGATGTGAAATGCCCCGTGATCAATAATAAACCAGTGGATGTGAATTAGT
CUST_88_PI426249100	234.507	238.993	231.524	294.646	276.925	284.635	342.968	7.91362	7.93126	7.9189	8.16472	8.15146	8.15423	8.34254	P	P	P	P	P	P	P	coding	NM_018951_Exon1-	NM_018951	HOX cluster	988	chr7	-	27212967	27213955	NM_018951,	AAATGTCAGCCAGAAAGGGCTATCTGCTCCCTTCGCCAAATTATCCCACAACAATGTCAT
ASHG19A3H0000644	30.4909	19.9058	18.6616	16.7682	20.7142	11.0951	24.4552	5.09047	4.60052	4.46993	3.8283	4.24885	3.21749	4.34751	A	P	P	P	P	A	P	coding	NM_005523_Exon1+	NM_005523	HOX cluster	781	chr7	+	27224054	27224835		AAAAGAAGGGAGGCTGGAGAAATCTGGACCCGAGACGTAGTAAGTACAACTTGGCAAATA
ASHG19A3A016638	156.64	158.997	151.879	311.017	276.957	242.415	338.918	7.36404	7.38209	7.35866	8.24868	8.15167	7.90891	8.3227	P	P	P	P	P	P	P	coding	NM_024501	HOXD1	RefSeq_coding	1991	chr2	+	177053306	177055635		TCGCTGTTTAGTTACTAGATGAACAAATCCACAGAATGGGTAAAGAGTAGAATCTGAACT	3231	Hs.83465	GO:0043565|GO:0003700|GO:0030528|GO:0048706|GO:0007275|GO:0006355|GO:0005634	NP_078777	Homeobox D1
ASHG19A3H0000524	149.167	230.302	123.508	533.757	440.327	404.318	184.151	7.29606	7.88394	7.07831	9.08959	8.8428	8.68029	7.39703	P	P	P	P	P	P	P	coding	NM_024017_intron2+	NM_024017	HOX cluster	2616	chr17	+	46700497	46703114		AGGCTTCCTCAGCACTTCCAAAGCTCTGCCTACATCAAGTTCCCTCTCAATTTTTCTCTA
ASHG19A3H0000576	139.204	155.199	154.378	158.557	161.55	182.2	417.197	7.20621	7.35162	7.38125	7.22055	7.32832	7.47489	8.64068	P	P	P	P	P	P	P	coding	NM_002145_Exon2+	NM_002145	HOX cluster	1089	chr17	+	46620020	46621109		AGAGGAAAATAGGTCCCTCTAGTTATTTTTAAGAAAGTCCCCCTAGAGTTTAATTATTCC
CUST_3_PI426247286	7.07093	5.00297	5	48.44	26.3395	26.4062	20.8741	3.06938	2.32205	2.39437	5.44266	4.60072	4.58548	4.0921	A	A	A	P	P	P	P	coding	NM_014212_intron1+	NM_014212	HOX cluster	1256	chr12	+	54367707	54368964		TTTTGAAAATGTTCAAACTATGTGTTCGCGGGTCCTCGAGCAGAAACCCAAGCAACTCTG
ASHG19A3H0000517	37.6275	37.8942	22.0476	61.9575	51.7676	44.2951	64.074	5.38319	5.44008	4.69707	5.81546	5.61625	5.36334	5.80867	P	P	P	P	P	P	P	coding	NM_024015_intron2+	NM_024015	HOX cluster	841	chr17	+	46654382	46655224		AAAGAGAAAGTTTTATTGCCCCCGAAAGAGAGAGTCCTTTCTTCCAGGGAACACAGCGTT
ASHG19A3H0000634	186.893	202.03	191.696	298.236	242.959	259.962	281.846	7.61027	7.70883	7.67471	8.1857	7.94683	8.01369	8.05047	P	P	P	P	P	P	P	coding	NM_024014_Exon2+	NM_024014	HOX cluster	421	chr7	+	27185115	27185536		GTAAGAAATAAATGCACAGACGCTTGCAAAGCTCCGGGCTCCCCTGAAGCTGCGGAAGCC
ASHG19A3H0000627	22.4358	31.3709	20.066	66.3818	33.8762	41.0035	31.5832	4.65213	5.18756	4.57248	5.91608	4.98015	5.24532	4.74012	P	P	P	P	P	P	P	coding	NM_030661_Exon1+	NM_030661	HOX cluster	80	chr7	+	27159134	27159214		CGTTTCATGAGCTGTCTAAAAATCTTCTCTTTTCTGGTCTTAGTTTCTGAACTTCTGAGA
ASHG19A3A048662	203.371	209.914	162.881	197.107	199.556	194.52	221.242	7.72479	7.75903	7.45016	7.55302	7.64428	7.57251	7.67586	P	P	P	P	P	P	P	coding	NM_022658	HOXC8	RefSeq_coding	2290	chr12	+	54402889	54406543		ACTAACAGTAGCGAAGGACAAGGCCACTTAAATCAAAACTCGTCTCCCAGCCTCATGTTT	3224	Hs.664500	GO:0005515|GO:0043565|GO:0003700|GO:0016564|GO:0009952|GO:0007275|GO:0000122|GO:0030182|GO:0006355|GO:0048705|GO:0006351|GO:0005634	NP_073149	Homeobox C8
CUST_27_PI426247286	84.3987	83.7925	62.9619	163.942	119.806	139.243	176.853	6.52209	6.50622	6.14777	7.27423	6.8734	7.06624	7.33503	P	P	P	P	P	P	P	coding	NM_000523_intron1+	NM_000523	HOX cluster	807	chr2	+	176958399	176959207		CCTCAGCTAGGTGCTCCGAATATCCCAGCCTAATTTTTCTTGTGCTTTTGTTTGTATCAG
ASHG19A3H0000564	159.372	161.49	176.573	300.118	271.715	295.966	419.161	7.387	7.40338	7.56382	8.19592	8.12159	8.2161	8.64737	P	P	P	P	P	P	P	coding	NM_153693_Exon1-	NM_153693	HOX cluster	557	chr12	-	54410641	54411198		TGCCGCTGCCGAGCCTGTCTCAGCTCCACACACACACACATATACTTTATATAAATTCAA
ASHG19A3H0000582	35.674	31.9923	32.5763	38.8452	35.9963	37.1701	44.8359	5.31427	5.21488	5.23736	5.11355	5.07259	5.1015	5.27288	P	P	P	P	P	P	P	coding	NM_024015_Exon2+	NM_024015	HOX cluster	1513	chr17	+	46652869	46654382		GCTGGTCACAAGAAACCAAACATTTATTTCTATTGTCACTCTGTACAGCACACAGATATT
CUST_4_PI426249100	19.949	21.0565	19.0246	27.4189	18.0448	27.3961	24.7336	4.48445	4.67066	4.49955	4.59021	4.03288	4.63919	4.36479	A	A	P	P	P	P	P	coding	NM_173860_Exon2+	NM_173860	HOX cluster	237	chr12	+	54350111	54350348	NM_173860,	AGAACCGGAGAATGAAAAAGAAAAGACTTCTGTTGAGGGAGCAAGCTCTCTCCTTCTTTT
ASHG19A3H0000550	8.65901	25.941	14.4991	22.4226	18.3808	22.3954	24.9374	3.32046	4.93518	4.1166	4.27517	4.06374	4.33454	4.378	P	A	A	P	P	P	P	coding	NM_018951_intron2+	NM_018951	HOX cluster	1174	chr7	+	27211792	27212967		CCCCGTTTTTGGCTTGCTGAGAGCAAGCAGTTCCTCCAAAAGTCATGACAAAAATTGAGT
ASHG19A3H0000529	85.6269	92.0195	87.6941	158.997	127.828	162.979	166.298	6.54319	6.64105	6.61123	7.2255	6.97509	7.30865	7.24069	P	P	P	P	P	P	P	coding	NM_021192_intron1-	NM_021192	HOX cluster	769	chr2	-	176972864	176973634		GAAAAGGCTCTCGACAGCTATTAATGTCCTCCTCGAAGTCTACCTTAAGCCCACCTAAAT
ASHG19A3A048666	18.0311	18.4041	15.615	24.9464	24.2208	17.9117	30.909	4.33848	4.50356	4.22685	4.44167	4.47594	3.98814	4.7049	A	P	A	P	P	P	P	coding	NM_153633	HOXC4	RefSeq_coding	1689	chr12	+	54447660	54449813	uc.345+,NM_014620,	AAGAATATTCGCAAAATAGCTACATCCCTGAACACAGTCCGGAATATTACGGCCGGACCA	3221	Hs.549040	GO:0043565|GO:0003700|GO:0030528|GO:0009952|GO:0051216|GO:0048562|GO:0007275|GO:0006355|GO:0006351|GO:0005634	NP_705897	Homeobox C4
ASHG19A3H0000615	53.7936	35.5195	19.5914	102.452	62.0773	46.1179	65.4924	5.88665	5.3547	4.54055	6.56923	5.89763	5.42554	5.8392	P	P	P	P	P	P	P	coding	NM_024501_Exon1-	NM_024501	HOX cluster	879	chr2	-	177053306	177054185		TTACCTTTCTTAGAGGCATTCCTCTTCACTTTCATCCACTCGAACGTGCTGAAGGCGGCA
ASHG19A3H0000505	12779.3	12886	13286.6	6475.9	9177.8	9540.89	10134.3	13.4308	13.4601	13.5393	12.7952	13.3477	13.3639	13.3802	P	P	P	P	P	P	P	coding	NM_022658_intron1-	NM_022658	HOX cluster	1367	chr12	-	54403504	54404872		CTCTGCCCACTGCCCTCTCCTTGTCTCTCTCTGCCTAATGCTTTTCCAATAAGAAAAATA
ASHG19A3H0000525	65.7377	92.911	65.1633	96.554	87.1806	98.8476	102.997	6.16833	6.65455	6.19156	6.48439	6.3947	6.55341	6.51574	P	P	P	P	P	P	P	coding	NM_032391_intron2+	NM_032391	HOX cluster	417	chr17	+	46799261	46799679		CGTTATCAATATTAATTTTGCTTATGCCAGGACTCCATCCCATTGGAGACAAACATTAAG
ASHG19A3H0000625	41.7942	45.84	20.2857	142.955	128.612	103.663	138.7	5.52861	5.69413	4.58747	7.06442	6.9839	6.62473	6.97165	P	P	P	P	P	P	P	coding	NM_153632_Exon2+	NM_153632	HOX cluster	162	chr7	+	27149733	27149895		TGGAGCTGCTGGTTTTCTGCTTTGTGTTTTGTCGAGACTCTTTCATCCAGGGGAAGATTT
CUST_23_PI426249100	7464.16	6940.25	7187.63	11117.6	10061.5	10616.7	11386.1	12.6731	12.5916	12.6767	13.6051	13.4788	13.5254	13.56	P	P	P	P	P	P	P	coding	NM_002145_Exon2-	NM_002145	HOX cluster	1089	chr17	-	46620020	46621109	NM_002145,	GGAATAATTAAACTCTAGGGGGACTTTCTTAAAAATAACTAGAGGGACCTATTTTCCTCT
ASHG19A3A008503	328.271	382.11	272.095	4262.13	4326.32	4669.62	4184.46	8.36925	8.56821	8.14438	12.1772	12.2178	12.3063	12.0796	P	P	P	P	P	P	P	coding	NM_002145	HOXB2	RefSeq_coding	1614	chr17	-	46620020	46622393		GGAGACATTTCAAACTTCATCAATCAAGGAGTCGACATTAATTCCTCCTCCTCCTCCTTT	3212	Hs.514289	GO:0043565|GO:0003700|GO:0030528|GO:0009952|GO:0008015|GO:0009953|GO:0048704|GO:0021612|GO:0002011|GO:0007275|GO:0048857|GO:0006355|GO:0021569|GO:0021570|GO:0005634	NP_002136	Homeobox B2
ASHG19A3H0000630	119.922	97.7677	111.65	35.3466	22.954	31.2186	26.1234	7.00618	6.72397	6.94023	4.97019	4.39676	4.83869	4.44322	P	P	P	P	P	P	P	coding	NM_002141_Exon2+	NM_002141	HOX cluster	1064	chr7	+	27168126	27169190	uc003syl.2,	AATGGAGTTTATTCTTAGCACATGGCTTTCTATGTAGCCACATCACAATTTGTACAGTTC
CUST_66_PI426249100	439.216	673.787	421.628	547.655	494.387	492.068	562.512	8.76601	9.32783	8.7441	9.12742	9.02515	8.9822	9.11109	P	P	P	P	P	P	P	coding	NM_005522_Exon1-	NM_005522	HOX cluster	746	chr7	-	27134879	27135625	NM_153620,NM_005522,	CATCTTCTCCAGCGCAGACTTTTGACTGGATGAAAGTCAAAAGAAACCCTCCCAAAACAG
CUST_53_PI426249100	2869.96	2798.25	2715.67	460.577	460.438	479.638	523.338	11.3335	11.2909	11.315	8.85649	8.91415	8.94286	8.99201	P	P	P	P	P	P	P	coding	NM_002148_Exon2+	NM_002148	HOX cluster	988	chr2	+	176983681	176984669	nc-HOXD9-16-,NM_002148,	TGTCCTTTCTGTGCATGTTCTGGTCGCATGTATAATGCAATAAACTCTGGAAATGAGTTC
ASHG19A3H0000556	134.281	129.721	140.852	273.055	271.727	272.633	311.123	7.15576	7.1059	7.2565	8.05241	8.12185	8.09076	8.19918	P	P	P	P	P	P	P	coding	NM_173860_Exon1-	NM_173860	HOX cluster	610	chr12	-	54348713	54349323		AAGGTGTCTCCCGTGTGGATGTTTACCAGCGGCCCCACAAACCCGGGATTCAGGAGATTA
CUST_14_PI426249100	15449.8	16093.2	15529.5	226.212	210.85	197.264	241.184	13.6925	13.7637	13.7554	7.76249	7.72695	7.59122	7.8132	P	P	P	P	P	P	P	coding	NM_004503_Exon2+	NM_004503	HOX cluster	1168	chr12	+	54423438	54424606	NM_153693,NM_004503,	TACCCTCCTGTATAAATCCAACCTCTGGGTCCGTTCTCGAATATTTAATAAAACTGATAT
ASHG19A3A032592	228.505	242.393	230.43	299.05	293.066	270.486	323.62	7.8757	7.95126	7.91303	8.19019	8.22674	8.07669	8.25429	P	P	P	P	P	P	P	coding	NM_018951	HOXA10	RefSeq_coding	2648	chr7	-	27210210	27213955		AAATGTCAGCCAGAAAGGGCTATCTGCTCCCTTCGCCAAATTATCCCACAACAATGTCAT	3206	Hs.110637	GO:0005515|GO:0043565|GO:0003700|GO:0030528|GO:0009952|GO:0030326|GO:0007275|GO:0009954|GO:0006355|GO:0001501|GO:0007283|GO:0005634|GO:0005667	NP_061824	Homeobox A10
CUST_37_PI426249100	4495.96	4360.07	4488.15	2330.28	2440.76	2116.23	2532.45	11.9677	11.9397	12.0336	11.2944	11.3892	11.1531	11.3557	P	P	P	P	P	P	P	coding	NM_004502_Exon2-	NM_004502	HOX cluster	855	chr17	-	46684602	46685457	NM_004502,	GCCCCATGCTCCCTTTTACATTCTGTGTGTATCTAAAGGATGGAAAAATAAAACGCAATT
ASHG19A3H0000640	172.64	199.925	189.928	49.7636	44.4952	47.6203	55.884	7.49731	7.69182	7.66242	5.48932	5.39017	5.47167	5.60288	P	P	P	P	P	P	P	coding	NM_018951_Exon2+	NM_018951	HOX cluster	1582	chr7	+	27210210	27211792		GCTTCATTCCACAGCTTTTATTCTATAAGAACATAAACATCGTCTTTTTCCACGCACAGC
ASHG19A3A048658	585.309	582.232	602.29	71.512	69.0341	68.914	67.9303	9.13273	9.12509	9.21983	6.03207	6.05393	6.02405	5.89436	P	P	P	P	P	P	P	coding	NM_014212	HOXC11	RefSeq_coding	2100	chr12	+	54366909	54370201		TGCTGGGGCCTGGATTTTTGTAAATAAATTTCCCAAGCGTTTCTTTCCACCTGGAGGGAA	3227	Hs.127562	GO:0003702|GO:0043565|GO:0003700|GO:0009952|GO:0042733|GO:0007492|GO:0001656|GO:0007275|GO:0001759|GO:0009954|GO:0006355|GO:0001501|GO:0005634	NP_055027	Homeobox C11
ASHG19A3H0000575	14.0281	45.1984	20.4498	36.1117	22.6314	27.1743	29.727	3.98915	5.67459	4.59876	5.00317	4.37559	4.62912	4.64626	P	A	P	P	P	P	P	coding	NM_002144_Exon1+	NM_002144	HOX cluster	583	chr17	+	46607689	46608272		TGGGTTTCTCTTAACCTTCATCCAGTCGAAGGTCCGGGCCGTGGGGGTGTTAGGTTCTGA
CUST_43_PI426249100	69.5581	61.8171	67.4469	103.145	78.6632	102.333	96.2754	6.25106	6.09303	6.24012	6.57929	6.24458	6.60476	6.41176	P	P	P	P	P	P	P	coding	NM_032391_Exon1-	NM_032391	HOX cluster	203	chr17	-	46799679	46799882	NM_032391,	TTCTCAGATCAAGGACCGGCCCATCTTACTACCTCCAAGAGTGCTTTTCTCTCTAATAAG
ASHG19A3A006237	1115.16	964.989	1018.52	1352.88	1244.91	1327.59	1306.82	10.0026	9.81535	9.93941	10.4981	10.4025	10.4796	10.3925	P	P	P	P	P	P	P	coding	NM_153620	HOXA1	RefSeq_coding	2358	chr7	-	27132615	27135625		CTACGCGTTAAATCAGGAAGCAGACCCACCAAGAAGCCTGTCGCTCCCCCGCATCGGAGA	3198	Hs.67397	GO:0003702|GO:0005515|GO:0043565|GO:0003700|GO:0048646|GO:0009952|GO:0021953|GO:0021612|GO:0021754|GO:0030902|GO:0042472|GO:0008045|GO:0007275|GO:0007399|GO:0045944|GO:0021569|GO:0021570|GO:0021571|GO:0005634	NP_705873	Homeobox A1
CUST_35_PI426249100	2255.81	2130.43	2078.08	2286.92	2160.96	2170.49	2445.34	10.9975	10.9277	10.9299	11.2612	11.2142	11.1926	11.3073	P	P	P	P	P	P	P	coding	NM_018952_Exon2-	NM_018952	HOX cluster	136	chr17	-	46681841	46681977	NM_018952,	ACAATATTATCTGGAAGCTGAAGAAGAAACTGAATACTCCTTCCTTCCTCCCCACCCATT
CUST_39_PI426247286	33.7493	22.5317	33.8403	29.4264	36.4278	28.0305	34.5234	5.23487	4.75139	5.28639	4.69587	5.08872	4.67468	4.87565	A	P	P	P	P	P	P	coding	NM_006735_intron2-	NM_006735	HOX cluster	643	chr7	-	27141084	27141728		TTTGTTGCAGTTGATCTTTTCTGCTATATTTATTCTCCAGTGGAATAACCCCGCTCGGAC
ASHG19A3A016631	2196.72	2359.91	2317.71	2349.38	2142.98	2298.44	2380.59	10.9525	11.0652	11.0905	11.3081	11.1995	11.2777	11.2703	P	P	P	P	P	P	P	coding	NM_014213	HOXD9	RefSeq_coding	1902	chr2	+	176987412	176989644	nc-HOXD8-19-,	TGCCCGAGGACCAGTTGTAAATGTTACTGCTTCCTACTAATAAATGCTGACCTGATCAAA	3235	Hs.236646	GO:0003702|GO:0043565|GO:0003700|GO:0016563|GO:0008344|GO:0009952|GO:0035115|GO:0048704|GO:0035137|GO:0030879|GO:0007275|GO:0048935|GO:0045944|GO:0009954|GO:0006355|GO:0007519|GO:0005634	NP_055028	Homeobox D9
ASHG19A3A048659	327.305	347.917	330.275	457.978	403.67	349.975	456.146	8.36425	8.43839	8.41588	8.84588	8.69902	8.45589	8.77688	P	P	P	P	P	P	P	coding	NM_017409	HOXC10	RefSeq_coding	2017	chr12	+	54378945	54384060		GTAGTATTGCTCCTTAAAAACCCCTCTCTCTGAAAATGACATGCCCTCGCAATGTAACTC	3226	Hs.44276	GO:0003702|GO:0043565|GO:0003700|GO:0009952|GO:0030326|GO:0007275|GO:0050905|GO:0008284|GO:0009954|GO:0006355|GO:0001501|GO:0021520|GO:0019907|GO:0005634	NP_059105	Homeobox C10
CUST_69_PI426249100	8.38957	23.9924	11.2544	73.0302	41.8064	48.5506	40.8154	3.27324	4.8357	3.78037	6.06182	5.2978	5.49988	5.1311	A	A	A	P	P	M	P	coding	NM_006735_Exon1-	NM_006735	HOX cluster	666	chr7	-	27141728	27142394	uc.212-,NM_006735,	GATACATTTCAAAGTTCATCAATCAAGACCTCGACGCTTTCACACTCGACACTGATTCCT
CUST_26_PI426249100	22.3239	20.2835	19.8433	19.9463	28.5483	28.5468	29.8596	4.64531	4.62437	4.55797	4.09788	4.72766	4.70307	4.65242	A	P	P	P	P	P	P	coding	NM_002146_Exon3-	NM_002146	HOX cluster	606	chr17	-	46629388	46629994	NM_002146,	AAACAGATATTCCCCTGGATGAAAGAGTCGAGGCAAACGTCCAAGCTGAAAAACAACTCC
CUST_41_PI426249100	449.989	460.448	431.972	60.9418	51.827	47.1612	47.214	8.79869	8.81817	8.77471	5.79055	5.61822	5.45853	5.3502	P	P	P	P	P	P	P	coding	NM_024017_Exon2-	NM_024017	HOX cluster	1972	chr17	-	46698525	46700497	NM_024017,	TTTCTTTGGGGGTGATTGTCTCGCTTGTTTTCAGTTGTCGATTATATGGGAGGGTTCTGG
CUST_13_PI426249100	105.56	104.938	109.09	26.0769	24.1472	24.6086	23.2177	6.82891	6.81662	6.90806	4.51139	4.4713	4.48086	4.26308	P	P	P	P	P	P	P	coding	NM_153693_Exon2+	NM_153693	HOX cluster	346	chr12	+	54422359	54422705	uc.343+,NM_153693,NM_004503,	AAACACCTTAGGACATAACACACAGACCTCAATCGCTCAGGATTTTAGTTCTGAGCAGGG
CUST_83_PI426249100	643.423	645.352	611.272	427.212	400.835	419.993	442.256	9.26849	9.26575	9.23834	8.73448	8.68568	8.73363	8.73174	P	P	P	P	P	P	P	coding	NM_006896_Exon2-	NM_006896	HOX cluster	1502	chr7	-	27193339	27194841	nc-HOXA6-72-,NM_006896,	CACACTTCCCAGCCCAGCTGTGTTTTATGTAACCGAAAATAAAGATGCGTGGTGACAAAG
CUST_7_PI426247286	73.4672	71.3003	68.6116	91.3762	79.5224	68.2856	92.7681	6.33208	6.28768	6.26436	6.40487	6.25956	6.00957	6.35719	P	P	P	P	P	P	P	coding	NM_153693_intron1+	NM_153693	HOX cluster	11160	chr12	+	54411198	54422359	NM_004503,	TAGACCGACCAGGTAAAGGCAAAGGGATGAATTCCTACTTCACTAACCCTTCCTTATCCT
ASHG19A3A008514	425.95	449.957	390.582	58.3217	44.751	55.0927	148.514	8.72406	8.79001	8.64792	5.7217	5.39983	5.68865	7.07729	P	P	P	P	P	P	P	coding	NM_024017	HOXB9	RefSeq_coding	2711	chr17	-	46698525	46703835		TTTCTTTGGGGGTGATTGTCTCGCTTGTTTTCAGTTGTCGATTATATGGGAGGGTTCTGG	3219	Hs.463350	GO:0005515|GO:0043565|GO:0003700|GO:0016563|GO:0009952|GO:0060070|GO:0060326|GO:0048706|GO:0030879|GO:0007275|GO:0045944|GO:0006355|GO:0006351|GO:0005739|GO:0005730|GO:0005634|GO:0005634	NP_076922	Homeobox B9
CUST_27_PI426249100	1575.18	1898.25	1718.86	2694.8	2317.2	2434.92	2555.84	10.4762	10.7566	10.6662	11.4979	11.3175	11.3593	11.3705	P	P	P	P	P	P	P	coding	NM_002146_Exon2-	NM_002146	HOX cluster	88	chr17	-	46632892	46632980	NM_002146,	TCTGGGGCTCGATGTGAATATATATTATGTCTGCCTGTTCTCCCCTCGTCGGTGGCTAAG
ASHG19A3H0000607	22.1956	21.4064	21.5767	40.662	34.2858	30.5844	40.3797	4.63541	4.69086	4.66623	5.17929	4.99801	4.80881	5.11341	A	P	P	P	P	P	P	coding	NM_014213_Exon1-	NM_014213	HOX cluster	901	chr2	-	176987412	176988313		GCCCTCATGGCCTATAAGCGAGTCCACGTAGTAGTTGCTGAGGGTGCCACTGGAAGACAT
CUST_56_PI426249100	214.067	225.432	221.385	155.64	144.931	162.77	161.062	7.78724	7.85264	7.85983	7.19279	7.16262	7.30692	7.19509	P	P	P	P	P	P	P	coding	NM_019558_Exon1+	NM_019558	HOX cluster	1195	chr2	+	176994476	176995671	NM_019558,	TAATATTGGCGAGGACCCAGACCACTTAAATCAGAGCTCGTCTCCTTCTCAAATGTTTCC
ASHG19A3A032580	67.6063	63.6957	61.651	94.5415	81.1944	90.9908	63.0242	6.21141	6.13365	6.11967	6.4548	6.29361	6.4299	5.78376	P	P	P	P	P	P	P	coding	NM_005522	HOXA1	RefSeq_coding	2561	chr7	-	27132615	27135625		TATGGACAGGAGCACCAGAGCCTGGCCCTGGCTACGTATAATAACTCCTTGTCCCCTCTC	3198	Hs.67397	GO:0003702|GO:0005515|GO:0043565|GO:0003700|GO:0048646|GO:0009952|GO:0021953|GO:0021612|GO:0021754|GO:0030902|GO:0042472|GO:0008045|GO:0007275|GO:0007399|GO:0045944|GO:0021569|GO:0021570|GO:0021571|GO:0005634	NP_705873	Homeobox A1
CUST_77_PI426249100	3983.36	3976.04	3629.9	479.876	476.419	457.982	446.297	11.7889	11.8005	11.7295	8.92326	8.966	8.87093	8.74361	P	P	P	P	P	P	P	coding	NM_002141_Exon2-	NM_002141	HOX cluster	1064	chr7	-	27168126	27169190	NM_002141,	GAACTGTACAAATTGTGATGTGGCTACATAGAAAGCCATGTGCTAAGAATAAACTCCATT
ASHG19A3H0000561	47.1296	49.5931	35.1993	21.7121	25.1498	30.0543	40.3706	5.70045	5.79622	5.34215	4.22584	4.53072	4.78287	5.11302	P	P	P	P	P	P	P	coding	NM_017409_Exon2-	NM_017409	HOX cluster	1108	chr12	-	54382952	54384060		CTACATGCAAAAGATACAACATACAGAATATCTTTAAATAACACAACTCCCAGACAGGGA
CUST_20_PI426247286	147.324	181.64	156.101	266.277	228.855	270.866	283.023	7.27887	7.56266	7.39331	8.01334	7.85243	8.07957	8.05606	P	P	P	P	P	P	P	coding	NM_018952_intron3-	NM_018952	HOX cluster	6250	chr17	-	46675590	46681841		TTGACAATTCCTGCCTCTGCCATTGGTCAGTGTTGGATCAGATGGTTGTATTTCCTTCTG
ASHG19A3H0000569	112.496	47.4708	44.3614	38.3928	44.654	31.7561	63.0082	6.91612	5.74277	5.66723	5.09473	5.3968	4.86309	5.78339	P	P	P	P	P	P	P	coding	NM_018953_Exon2-	NM_018953	HOX cluster	1081	chr12	-	54428061	54429142		AGTCCTGTTCTCTCTTTATTTGATATGACAAAATATAGTTTCAGGAAGGACCCAGAGTCA
CUST_6_PI426249100	590.134	604.88	582.54	81.281	78.0887	72.2809	77.9711	9.1501	9.17714	9.16847	6.23131	6.23349	6.0979	6.10266	P	P	P	P	P	P	P	coding	NM_014212_Exon2+	NM_014212	HOX cluster	1237	chr12	+	54368964	54370201	NM_014212,	TGCTGGGGCCTGGATTTTTGTAAATAAATTTCCCAAGCGTTTCTTTCCACCTGGAGGGAA
ASHG19A3H0000518	123.127	138.385	127.217	277.424	229.722	405.438	274.939	7.04028	7.19531	7.11607	8.07699	7.85838	8.6841	8.01302	P	P	P	P	P	P	P	coding	NM_002147_intron2+	NM_002147	HOX cluster	663	chr17	+	46669818	46670482		GAAAGCTCCTTTTACTGTTCACCCCTTCTTTGCTAGCGACAGTCTCAAAATTTCAGGGGT
ASHG19A3H0000528	282.549	327.971	301.542	483.445	446.74	435.804	439.571	8.15561	8.35945	8.28955	8.93266	8.8659	8.79026	8.71942	P	P	P	P	P	P	P	coding	NM_021193_intron1-	NM_021193	HOX cluster	145	chr2	-	176965103	176965249		CTGCAACACAGCCCCAACCCACGTCAACCCAGCCCGTACTCTGTCTATTGCCCGCCCCCA
ASHG19A3H0000604	14.3377	11.1604	19.505	14.7277	11.626	14.5358	17.3297	4.01883	3.89898	4.53411	3.621	3.32383	3.65516	3.79973	A	A	P	P	A	P	P	coding	NM_021192_Exon2-	NM_021192	HOX cluster	680	chr2	-	176973634	176974314		ATGACAGACTAAAAGTACATTTCCCAAAGTTTAAATAACCTGCATTCACCGAAGAGGAAG
CUST_25_PI426249100	3437.89	3375.99	3265.65	3650.12	3269.52	3559.99	3834.88	11.5859	11.5679	11.574	11.9425	11.8173	11.9078	11.952	P	P	P	P	P	P	P	coding	NM_002146_Exon4-	NM_002146	HOX cluster	2311	chr17	-	46626232	46628543	nc-HOXB2-164-,NM_002146,	GGAACTTTCTTTGTTCTTCAGTAGTTACTTTTTTCCTTACCTAAAAGGGTTGTCTGTCAA
ASHG19A3A016630	45.0575	41.2875	97.0686	43.7374	35.7701	42.407	50.8652	5.63868	5.55272	6.747	5.29219	5.0629	5.29867	5.45836	P	P	P	P	P	P	P	coding	NM_002148	HOXD10	RefSeq_coding	1814	chr2	+	176981491	176984669		TGGATATTTTAGACTGAGTCAGACCTACGCCACCGGGAAAACCCAAGAGTACAATAATAG	3236	Hs.123070	GO:0003702|GO:0003682|GO:0043565|GO:0003700|GO:0008344|GO:0009952|GO:0030326|GO:0048704|GO:0035136|GO:0035137|GO:0007275|GO:0050905|GO:0048935|GO:0045944|GO:0009954|GO:0006355|GO:0007519|GO:0001501|GO:0021520|GO:0005634	NP_002139	Homeobox D10
CUST_67_PI426249100	140.829	98.0263	78.2365	50.8522	48.9748	48.4229	52.4452	7.22243	6.72804	6.44779	5.52394	5.53285	5.4953	5.50845	P	P	P	P	P	P	P	coding	NM_153620_Exon1-	NM_153620	HOX cluster	448	chr7	-	27135177	27135625	NM_153620,NM_005522,	TATGGCTCACAGAACTTCAGTGCGCCTTACAGCCCCTACGCGTTAAATCAGGAAGCAGAC
CUST_85_PI426249100	1700.19	1726.22	1699.49	315.689	267.261	315.704	295.548	10.5796	10.6043	10.6497	8.27214	8.09578	8.31048	8.12476	P	P	P	P	P	P	P	coding	NM_152739_Exon2-	NM_152739	HOX cluster	1403	chr7	-	27202057	27203460	NM_152739,	CCTCAAGGCCTACTGACCAAATTGTTGTGTTGAGATGATATTTAACTTTTTGCCAAATAA
CUST_38_PI426247286	69.1958	67.1962	64.2711	91.9339	72.7968	96.6778	73.7531	6.24311	6.20493	6.17333	6.41366	6.12721	6.51978	6.01789	P	P	P	P	P	P	P	coding	NM_153620_intron2-	NM_153620	HOX cluster	202	chr7	-	27134974	27135177	NM_005522,	TATGGACAGGAGCACCAGAGCCTGGCCCTGGCTACGTATAATAACTCCTTGTCCCCTCTC
CUST_7_PI426249100	277.511	345.851	245.186	431.905	436.817	400.625	467.943	8.12853	8.43169	7.9987	8.75192	8.82739	8.66502	8.81575	P	P	P	P	P	P	P	coding	NM_017409_Exon1+	NM_017409	HOX cluster	849	chr12	+	54378945	54379794	NM_017409,	GTAGTATTGCTCCTTAAAAACCCCTCTCTCTGAAAATGACATGCCCTCGCAATGTAACTC
CUST_61_PI426249100	352.858	338.226	356.377	339.401	337.771	349.73	361.797	8.4675	8.40189	8.5209	8.38669	8.43856	8.45519	8.42013	P	P	P	P	P	P	P	coding	NM_006898_Exon3+	NM_006898	HOX cluster	1582	chr2	+	177036244	177037826	NM_006898,	AAACCACAGTCCTCACCACAGTTTATTGATTTCAAATTGTCTGGTACTATTGGAACAAAT
ASHG19A3A006241	136.401	150.404	139.43	247.29	253.72	268.936	228.884	7.17849	7.30537	7.24354	7.89837	8.02064	8.06708	7.72743	P	P	P	P	P	P	P	coding	NM_153693	HOXC6	RefSeq_coding	2072	chr12	+	54410641	54424606		AGAGGGAGAGTGACAGCAGCGCTCGGACGTCCTCCCCAACGTCGCCCTCAATTCCACCGC	3221	Hs.549040	GO:0043565|GO:0003700|GO:0030528|GO:0009952|GO:0051216|GO:0048562|GO:0007275|GO:0006355|GO:0006351|GO:0005634	NP_705897	Homeobox C4
CUST_25_PI426247286	40.7363	164.684	45.0559	21.5477	17.1987	20.5383	20.7019	5.49071	7.42968	5.68865	4.21422	3.95767	4.20258	4.07864	P	P	P	P	P	P	P	coding	NM_032391_intron2-	NM_032391	HOX cluster	417	chr17	-	46799261	46799679		CTTAATGTTTGTCTCCAATGGGATGGAGTCCTGGCATAAGCAAAATTAATATTGATAACG
ASHG19A3H0000609	33.3868	31.9018	47.0351	70.8317	64.0533	62.4917	80.2795	5.2195	5.20994	5.74603	6.01723	5.94275	5.87616	6.14866	P	P	P	P	P	P	P	coding	NM_019558_Exon1-	NM_019558	HOX cluster	1195	chr2	-	176994476	176995671		GGAAACATTTGAGAAGGAGACGAGCTCTGATTTAAGTGGTCTGGGTCCTCGCCAATATTA
ASHG19A3H0000546	2188.46	2377.05	1734.01	2319.33	2658.72	2468.33	2394.21	10.9474	11.0748	10.6782	11.2862	11.5245	11.3827	11.2777	P	P	P	P	P	P	P	coding	NM_019102_intron2+	NM_019102	HOX cluster	959	chr7	+	27181704	27182664		CCGCACACCCCTCCCGAATTTCCTTCTCTCTTCCTTTCTAGAAAGAAAACAATACGATTT
ASHG19A3H0000548	134.485	140.756	119.945	259.445	235.368	263.231	299.611	7.15806	7.21879	7.03558	7.97712	7.8956	8.0318	8.14329	P	P	P	P	P	P	P	coding	NM_006896_intron2+	NM_006896	HOX cluster	943	chr7	+	27194841	27195785		TTTCCAGCCGGCTAAGCTTCCACAATGTCCTGCTTCCTCTGACAAAGGAAAACTGTAAAT
CUST_87_PI426249100	18167.5	18644.7	18888.8	429.185	368.44	425.619	466.004	13.9195	13.9801	14.0448	8.74099	8.56189	8.75685	8.80941	P	P	P	P	P	P	P	coding	NM_018951_Exon2-	NM_018951	HOX cluster	1582	chr7	-	27210210	27211792	NM_153715,NM_018951,	GCTGTGCGTGGAAAAAGACGATGTTTATGTTCTTATAGAATAAAAGCTGTGGAATGAAGC
CUST_8_PI426247286	48.6331	52.5271	52.1507	63.7806	66.75	65.4157	53.8146	5.74475	5.8745	5.88766	5.85847	6.0033	5.94864	5.5464	P	P	P	P	P	P	P	coding	NM_004503_intron1+	NM_004503	HOX cluster	732	chr12	+	54422705	54423438		AACAGTCTGCAGAGGACGCTTTGCTGATTGCTTTTAGTGTGTTTTGTGCCCGGATCTTTA
ASHG19A3H0000563	14.982	8.19309	16.1843	21.5077	21.7411	17.9501	23.8586	4.07716	3.55756	4.27786	4.21089	4.31663	3.99157	4.30692	A	A	A	P	P	P	P	coding	NM_022658_Exon2-	NM_022658	HOX cluster	1671	chr12	-	54404872	54406543		TCTTTTTATTATTATGACTCACGTATACAATACAAAGTACTTGGACCAGGAACAGGGCTG
ASHG19A3H0000504	50.8327	19.6166	11.9102	24.1982	23.6679	25.3879	32.2784	5.80568	4.58283	3.85472	4.3948	4.43989	4.52556	4.77318	A	P	A	P	P	P	P	coding	NM_017409_intron1-	NM_017409	HOX cluster	3157	chr12	-	54379794	54382952		CTGTTAAAAATAACATTATTTACATAAGTATCCCTCGAAGTCGAAAACCCTCTCAGCGCT
ASHG19A3H0000641	11.8215	13.277	18.4555	23.8808	20.611	25.369	15.0205	3.74519	4.10271	4.45495	4.37584	4.2415	4.52385	3.56465	A	A	P	A	P	P	P	coding	NM_018951_Exon1+	NM_018951	HOX cluster	988	chr7	+	27212967	27213955		ATGACATTGTTGTGGGATAATTTGGCGAAGGGAGCAGATAGCCCTTTCTGGCTGACATTT
CUST_22_PI426249100	112.787	140.904	130.993	119.615	163.862	154.867	172.213	6.91939	7.21986	7.15892	6.7949	7.34658	7.23016	7.29509	P	P	P	P	P	P	P	coding	NM_002144_Exon1-	NM_002144	HOX cluster	583	chr17	-	46607689	46608272	NM_002144,	TCAGAACCTAACACCCCCACGGCCCGGACCTTCGACTGGATGAAGGTTAAGAGAAACCCA
CUST_12_PI426247286	21.8239	11.4419	15.5421	32.5945	20.7583	30.5213	35.481	4.61041	3.92994	4.22124	4.84734	4.25169	4.80491	4.91734	A	P	A	P	P	P	P	coding	NM_002144_intron2-	NM_002144	HOX cluster	451	chr17	-	46607237	46607689		AACTTTGACAACTGTACTTGGGCAGAATGGCAAATGGAGGTCCAGAGCCAGCCCCGGGAG
ASHG19A3H0000602	12.843	28.6666	24.5011	99.7078	85.9933	85.4908	98.2251	3.86491	5.06815	4.84139	6.52887	6.37595	6.33497	6.44196	P	A	P	P	P	P	P	coding	NM_021193_Exon2-	NM_021193	HOX cluster	239	chr2	-	176965249	176965488		TGAGGTTCAGCCTATTGGACAATTCCTTGCGTTTCTGCCTGTTGATGAATTCGTTGACGA
CUST_30_PI426249100	3417.38	3440.15	3388.91	2202.58	2133.24	2192.09	2039.31	11.5802	11.5919	11.6311	11.2086	11.1894	11.207	11.0361	P	P	P	P	P	P	P	coding	NM_024015_Exon1-	NM_024015	HOX cluster	519	chr17	-	46655224	46655743	NM_024015,	TTTGATCAACTCAAACTATGTCGACCCCAAGTTCCCTCCATGCGAGGAATATTCACAGAG
CUST_18_PI426249100	6.92902	16.3121	30.1479	18.5178	24.2655	20.4594	32.5636	3.04831	4.35261	5.13455	3.9849	4.47743	4.19617	4.78639	A	A	P	P	P	P	P	coding	NM_153633_Exon1+	NM_153633	HOX cluster	485	chr12	+	54447660	54448145	uc.345+,NM_153633,NM_014620,	AAGAATATTCGCAAAATAGCTACATCCCTGAACACAGTCCGGAATATTACGGCCGGACCA
CUST_22_PI426247286	32.7785	39.1211	15.3076	110.321	106.159	81.8237	139.416	5.19151	5.48119	4.20174	6.67617	6.69032	6.26989	6.97933	P	M	A	P	P	P	P	coding	NM_004502_intron2-	NM_004502	HOX cluster	2422	chr17	-	46685457	46687880		GGGAAAATGGGCTTCTTTGCCCATCGCCCATTGACTTCAAATCACATACACGGTATAAGA
ASHG19A3H0000568	17.336	19.975	22.4968	79.3839	35.8584	36.181	77.5905	4.27664	4.60421	4.72546	6.19409	5.06654	5.05952	6.09435	A	A	P	P	P	P	P	coding	NM_018953_Exon1-	NM_018953	HOX cluster	529	chr12	-	54426831	54427360	uc.344-,	CGATCCATAGTTCCCACAAGTTTGCATGTTATAGGCAGGGATATTGGGGCTCTGCTTATA
CUST_46_PI426249100	33.4294	34.1039	27.9398	50.8403	46.1154	53.8323	48.9177	5.22123	5.29748	5.02749	5.52343	5.44583	5.65593	5.40014	P	P	P	P	P	P	P	coding	NM_000523_Exon1+	NM_000523	HOX cluster	868	chr2	+	176957531	176958399	NM_000523,	AGGTGTACTGCACCAAGGACCAGCCACAGGGGTCCCACTTTTGGAAATCTTCCTTTCCAG
CUST_31_PI426247286	61.6612	5.82039	21.3412	17.8826	41.395	18.9873	18.4942	6.07327	3.028	4.65397	3.93061	5.28373	4.07976	3.9035	A	P	P	P	P	P	P	coding	NM_014213_intron1+	NM_014213	HOX cluster	347	chr2	+	176988313	176988661		TTATGATAATTCCCCACAAGTTGTGAAAAGCGACCATCCTTGGTGAAATTAATTTAACGA
ASHG19A3H0000566	30.2298	23.279	21.6251	33.2266	40.562	33.4616	42.8473	5.07766	4.79554	4.67019	4.87437	5.25098	4.93709	5.20446	A	P	P	P	P	P	P	coding	NM_153693_Exon2-	NM_153693	HOX cluster	346	chr12	-	54422359	54422705	uc.343-,	CCCTGCTCAGAACTAAAATCCTGAGCGATTGAGGTCTGTGTGTTATGTCCTAAGGTGTTT
ASHG19A3H0000533	151.685	186.449	165.493	511.601	453.752	505.888	548.334	7.31975	7.59724	7.47069	9.0246	8.88806	9.03008	9.06611	M	M	P	P	M	M	M	coding	NM_014621_intron1-	NM_014621	HOX cluster	540	chr2	-	177016794	177017335		TCCTCAAACACACCCACATACCCCAGGCTTGCGGGATCCCCAAATGTGCTCCTTCTTCTG
CUST_10_PI426249100	7574.23	8229.13	7243.39	235.321	318.029	329.35	298.338	12.6951	12.8358	12.6883	7.82427	8.34907	8.36707	8.13816	M	P	M	P	M	M	M	coding	NM_022658_Exon2+	NM_022658	HOX cluster	1671	chr12	+	54404872	54406543	NM_022658,	CAGCCCTGTTCCTGGTCCAAGTACTTTGTATTGTATACGTGAGTCATAATAATAAAAAGA
ASHG19A3H0000081	2445.51	3475.54	2657.71	940.577	2210.09	2002.56	2390.36	11.1108	11.6066	11.2815	9.95724	11.2461	11.0702	11.2749	P	P	P	M	M	M	M	noncoding	nc-HOXA1-53-	nc-HOXA1-53	HOX cluster	138	chr7	-	27135887	27136025		GCCCTCTTCCCTTCTCACCTCTCGCCAGTTCATCTTTCATTGAACGGTGGGGAGGGGGCG
CUST_43_PI426075208	37.2099	25.0061	30.1278	62.2691	66.5641	41.2555	61.9749	5.36788	4.88934	5.13318	5.82336	5.99967	5.25377	5.75711	A	P	P	M	M	M	M	noncoding	nc-HOXB2-160+	nc-HOXB2-160	HOX cluster	310	chr17	+	46622394	46622704		TTATTTGGTTTAATTGATTCAAAAACACCAGAGGACCACGACCAGGACACCATGAGCCCC
ASHG19A3A007737	900.527	843.07	807.692	938.571	881.01	723.026	973.275	9.71388	9.63613	9.62437	9.95286	9.89355	9.57036	9.94286	P	P	P	M	M	M	M	noncoding	NR_033204	LOC404266	RefSeq_NR	486	chr17	+	46669681	46683772		TCTCGATGCGCCGTCGCCGGGTCAGCCGTTTCCTCTCCCTCGCCGGCCTCGGCGGAGATT
ASHG19A3A007737	900.527	843.07	807.692	938.571	881.01	723.026	973.275	9.71388	9.63613	9.62437	9.95286	9.89355	9.57036	9.94286	P	P	P	M	M	M	M	noncoding	NR_033204	LOC404266	RefSeq_NR	486	chr17	+	46669681	46683772		TCTCGATGCGCCGTCGCCGGGTCAGCCGTTTCCTCTCCCTCGCCGGCCTCGGCGGAGATT
ASHG19A3H0000202	788.914	786.148	725.72	65.8366	61.8413	73.691	71.5998	9.53531	9.53157	9.47401	5.90338	5.88971	6.12425	5.9707	P	P	P	M	M	M	M	noncoding	nc-HOXD9-16-	nc-HOXD9-16	HOX cluster	558	chr2	+	176984428	176984986		ATTAAGAAAACCCACAAGTTGGAGGGAGGGGGACTTAAAAAGCACATTACAATGTATCTT
ASHG19A3H0000205	14014.1	16568.1	12791.9	2726.68	4782.53	4805.11	4571.33	13.5487	13.8065	13.4944	11.5153	12.3686	12.3487	12.2059	P	P	P	M	M	M	M	noncoding	nc-HOXC10-129-	nc-HOXC10-129	HOX cluster	260	chr12	+	54378513	54378773		CTCCACCCCTCTACCTCCCCTGCCGCCCGGGGGGCGCTTCCTTTGTTCGCGGGGAAGGGC
ASHG19A3H0000094	33571.7	30229.5	27715.1	30056.7	29037.7	26340.5	28785.2	14.7896	14.6749	14.5924	15.0715	15.008	14.8455	14.9048	P	P	P	P	P	M	P	noncoding	nc-HOXB9-193-	nc-HOXB9-193	HOX cluster	858	chr17	-	46768301	46769159		CAGAAAATGTTGACATTACTCTGAAGGGATGCACAGTTATTGTGAAGGGCCCCAGAGGAA
ASHG19A3H0000181	37.3519	17.6637	27.1014	15.355	11.3051	15.3423	12.2897	5.37423	4.45192	4.98691	3.68863	3.28004	3.73726	3.23225	A	P	P	A	A	M	M	noncoding	nc-HOXD3-39-	nc-HOXD3-39	HOX cluster	2228	chr2	+	177018599	177020827		TGGGGAAAGAAAACAAAACCTCTATGCACTGGGTCATTAGATAATGACTGAATTTTCTGT
ASHG19A3H0000088	107.179	114.433	98.1358	156.795	218.091	218.829	225.284	6.85036	6.93287	6.76013	7.20458	7.7784	7.75195	7.70234	P	P	P	P	M	M	M	noncoding	nc-HOXB2-162-	nc-HOXB2-162	HOX cluster	178	chr17	-	46623286	46623464		CCCACCACACTCATGCACACACATAACGCTGATCTGAACTTTGAGAGTGCTCTAAGTTAA
ASHG19A3H0000061	21251.6	27183.7	13983	10881.2	13430.3	17286.5	19298.1	14.1288	14.5115	13.6103	13.5763	13.9092	14.2439	14.3232	P	P	P	P	M	M	P	noncoding	nc-HOXB9-184-	nc-HOXB9-184	HOX cluster	198	chr17	-	46703989	46704187		CCCTTGCTCTCCCTCCCTCCCCGACCCGCCTGGGGAGAGGGCTCTACAGCCTGCGTCCCT
ASHG19A3A047649	95.4978	99.602	75.9046	105.783	97.8297	115.209	104.789	6.69388	6.7483	6.4052	6.61659	6.56591	6.77998	6.54274	P	P	P	P	P	P	P	noncoding	NR_026658	LOC100240735	RefSeq_NR	917	chr12	-	54472623	54475607		CATCCGGCTTTATGTACATGTGATATCCTGACAGATTTATATCTCTGAACAGCTATATAG
ASHG19A3H0000141	66.5056	55.4514	62.9861	171.024	155.18	77.2728	216.466	6.18693	5.94528	6.14803	7.33932	7.26512	6.18945	7.64212	P	P	P	P	P	P	P	noncoding	nc-HOXC6-247-	nc-HOXC6-247	HOX cluster	138	chr12	+	54417941	54418079		CAGTGGCACAAAAGGGGCCAGCGGGGCAACCGTTCTTCTCTTGCTCAGAAAAGTGAGACT
ASHG19A3H0000141	66.5056	55.4514	62.9861	171.024	155.18	77.2728	216.466	6.18693	5.94528	6.14803	7.33932	7.26512	6.18945	7.64212	P	P	P	P	P	P	P	noncoding	nc-HOXC6-247-	nc-HOXC6-247	HOX cluster	138	chr12	+	54417941	54418079		CAGTGGCACAAAAGGGGCCAGCGGGGCAACCGTTCTTCTCTTGCTCAGAAAAGTGAGACT
ASHG19A3H0000066	241.501	324.263	255.941	233.189	340.411	366.709	381.446	7.95126	8.34316	8.05805	7.81059	8.45052	8.52229	8.50519	P	P	P	P	P	P	P	noncoding	nc-HOXB9-189-	nc-HOXB9-189	HOX cluster	138	chr17	-	46720237	46720375		AGCAACCTTTTTGCTTCAGGGCTCCTCCTGGGGGCTGAGTGGTCCCCTTTGCTTTGCTAT
ASHG19A3H0000025	232.254	245.097	234.186	220.403	191.125	151.826	232.761	7.90136	7.96442	7.93342	7.71956	7.57712	7.19799	7.75422	P	P	P	P	P	P	P	noncoding	nc-HOXA4-63-	nc-HOXA4-63	HOX cluster	108	chr7	-	27176447	27176555		CTAAGCTCCCACCCAAGTAGGGGAGGGGATCCACAGCCCCAGCCATTCTAAGCCCCAGAA
CUST_147_PI426075208	11.939	6.9824	6.81504	14.1339	18.1329	14.8243	21.6023	3.75931	3.38813	3.12843	3.55366	4.04108	3.68465	4.15131	A	A	A	P	P	P	P	noncoding	nc-HOXC6-351+	nc-HOXC6-351	HOX cluster	875	chr12	-	54406545	54407420		AGGTAGAGAATAGGGAAGAGCTGTGGAGAAAAAGCAAGTCATTCCAGCTTCTATTATTTT
ASHG19A3H0000065	28.952	24.9144	20.1745	28.43	28.3268	26.4656	24.2623	5.01958	4.88387	4.58112	4.64333	4.7157	4.58896	4.33454	A	P	P	P	P	P	P	noncoding	nc-HOXB9-188-	nc-HOXB9-188	HOX cluster	98	chr17	-	46719077	46719175		GGGGCGCTGAGGAGGTCATTAACCTCCCCGTAAAGATGGGGAACGGAGACGCGCCTGGCC
ASHG19A3H0000174	42.0207	38.8736	31.651	65.3626	25.7544	19.1036	13.8413	5.53646	5.47362	5.19871	5.89383	4.56553	4.09066	3.42643	P	P	P	A	P	M	M	noncoding	nc-HOXD12-3-	nc-HOXD12-3	HOX cluster	858	chr2	+	176959802	176960660		TATTTGTTCATTCCCAGCACTGATTATCTTCATAATCCATTAGGACAGAATGGTTTTCAG
CUST_112_PI426075208	73.2735	65.0103	78.7895	135.85	75.6461	48.6595	49.9708	6.32849	6.16158	6.45956	6.98565	6.18849	5.50409	5.43346	P	P	P	P	P	P	P	noncoding	nc-HOXC11-110+	nc-HOXC11-110	HOX cluster	838	chr12	-	54359624	54360462		GAAAAAGAGAGAAAAGTTTCCCGGAGTCTTCATTAGTTGATTTCCCTGTCCGCCGCTTTC
CUST_121_PI426075208	15.5082	14.3802	13.4413	20.787	18.5383	14.8938	18.6771	4.12297	4.19944	4.01509	4.15965	4.07941	3.69236	3.91736	A	A	A	P	P	P	P	noncoding	nc-HOXC12-105+	nc-HOXC12-105	HOX cluster	188	chr12	-	54348466	54348654		GGGGTGAGTGGGGTAACAAAGGGCGGGGGCAGGTTTATTTGCTGAACTGATTTTCTAAAA
ASHG19A3H0000038	30.2847	49.0372	26.4651	64.9192	21.9306	55.9729	32.7302	5.08044	5.78026	4.95415	5.88444	4.32848	5.71188	4.79452	P	P	P	P	P	P	P	noncoding	nc-HOXA9-79-	nc-HOXA9-79	HOX cluster	248	chr7	-	27209027	27209275		TTGTTGGGATCCACCTTTCTCTCGACAGCACGACACTGCCTTCATTACTTCAGTTGAAAT
ASHG19A3H0000034	4207.21	3913.46	3664.88	4057.82	2084.38	1807.85	1402.17	11.8753	11.7754	11.7429	12.0986	11.1543	10.9303	10.4861	P	P	P	P	P	P	P	noncoding	nc-HOXA7-74-	nc-HOXA7-74	HOX cluster	238	chr7	-	27197697	27197935		TGCGCAGGAACTGGGGCTCCGTGGCGTCCCGATCTGAACCCTCCCTCCACCTTTTGTATT
ASHG19A3H0000208	754.401	704.665	753.823	558.244	608.997	644.315	553.935	9.47182	9.38379	9.52832	9.15499	9.33817	9.38852	9.08222	P	P	P	P	P	P	P	noncoding	nc-HOXC9-135-	nc-HOXC9-135	HOX cluster	138	chr12	+	54389365	54389503		CGGGCAGGGCAGGGAGCGGCTCTAGCTCTGGGGCGGCTCCCCCTCCAGCCACTCCCAGGC
CUST_42_PI426075208	14242.6	11569.6	14058	11664.1	15495.5	9687.16	15709.3	13.5638	13.304	13.6174	13.6714	14.1143	13.3893	14.0282	P	P	P	P	P	P	P	noncoding	nc-HOXB13-207+	nc-HOXB13-207	HOX cluster	108	chr17	+	46806423	46806531		AGGAAGAGGGGACGAGGAGCCGGGCCCCACCTCCTTCTCCTCCTCTCCCTCCCTAGCTTT
ASHG19A3H0000158	59.1125	29.1253	47.1372	60.436	41.0154	29.5966	43.6136	6.01698	5.08812	5.74803	5.77636	5.2704	4.75784	5.23109	A	P	P	P	P	M	M	noncoding	nc-HOXC9-132-	nc-HOXC9-132	HOX cluster	148	chr12	+	54386125	54386273		CCTTCCCCTTCTATAGCTCCATCTCCAGGGGAAGGACATGTTTGGGGTGTTGGTAGGTTA
ASHG19A3A008517	461.413	520.327	498.5	176.101	277.381	294.316	272.386	8.82682	8.97587	8.96464	7.38265	8.15313	8.20742	7.9987	P	P	P	P	P	P	P	noncoding	ENST00000474761	CTD-2377D24.2	Ensembl	144	chr17	-	46767842	46767986		TTCCAGAAAATGTTAACATCACTCTGAAGGGATACACAGTTGTGAAGGGCCCCAGAGGAA
ASHG19A3H0000047	407.851	368.06	322.579	457.85	429.823	400.622	493.663	8.66073	8.52012	8.37838	8.84577	8.79841	8.66477	8.90568	P	P	P	P	P	P	P	noncoding	nc-HOXB4-167-	nc-HOXB4-167	HOX cluster	348	chr17	-	46656230	46656578		CTAACCGTGCAGCTAAATGAGATTTGGAAGGCGAAGTCTCCCCGAATTAGTGCATGAATT
ASHG19A3H0000203	508.04	373.294	507.939	197.039	695.552	225.103	843.904	8.94813	8.54068	8.98856	7.55222	9.53994	7.79452	9.71926	P	P	P	P	P	P	P	noncoding	nc-HOXD9-17-	nc-HOXD9-17	HOX cluster	168	chr2	+	176986678	176986846		GTGTGTGAGTGTGGCAGGGGGAGGGGGCCCTCCGATCTGCTCCATCCGTCCGTTTTATTA
ASHG19A3H0000155	153.521	129.131	156.938	243.295	93.4203	172.689	237.452	7.33642	7.10196	7.40104	7.87711	6.50125	7.39381	7.78932	P	P	P	P	P	P	P	noncoding	nc-HOXC8-150-	nc-HOXC8-150	HOX cluster	723	chr12	+	54402165	54402888		TGATGCCTGAAGTATTTGGGAGTATGGTGTGCTTGTTCCTCCTCAAAGTCTCCAGACTTA
CUST_187_PI426075208	155.847	148.249	141.658	31.2363	33.9837	29.3661	31.6331	7.35783	7.28561	7.26512	4.78504	4.9855	4.7464	4.74229	P	P	P	P	P	P	P	noncoding	nc-HOXD4-22+	nc-HOXD4-22	HOX cluster	706	chr2	-	176996730	176997436		TACGCAAAGAAACCTTTTAGGAGTAAACAAAACGCACCCGAACTATTCATTATAAAGGAA
CUST_187_PI426075208	155.847	148.249	141.658	31.2363	33.9837	29.3661	31.6331	7.35783	7.28561	7.26512	4.78504	4.9855	4.7464	4.74229	P	P	P	P	P	P	P	noncoding	nc-HOXD4-22+	nc-HOXD4-22	HOX cluster	706	chr2	-	176996730	176997436		TACGCAAAGAAACCTTTTAGGAGTAAACAAAACGCACCCGAACTATTCATTATAAAGGAA
CUST_187_PI426075208	155.847	148.249	141.658	31.2363	33.9837	29.3661	31.6331	7.35783	7.28561	7.26512	4.78504	4.9855	4.7464	4.74229	P	P	P	P	P	P	P	noncoding	nc-HOXD4-22+	nc-HOXD4-22	HOX cluster	706	chr2	-	176996730	176997436		TACGCAAAGAAACCTTTTAGGAGTAAACAAAACGCACCCGAACTATTCATTATAAAGGAA
ASHG19A3H0000030	1092.13	958.514	912.867	722.929	531.428	634.658	643.12	9.97634	9.80323	9.78954	9.54356	9.13831	9.36374	9.30853	P	P	P	P	P	P	P	noncoding	nc-HOXA6-70-	nc-HOXA6-70	HOX cluster	178	chr7	-	27191677	27191855		CACCCAGGGAGGCTTTAAGAGGGGCATACTCCCCCTTACCCATACTCACCCATTCACACT
ASHG19A3H0000162	48.3455	43.1211	34.9662	42.2329	30.6193	25.4229	22.2803	5.73658	5.61071	5.33253	5.23647	4.83166	4.52772	4.19706	P	P	P	P	P	P	P	noncoding	nc-HOXC9-141-	nc-HOXC9-141	HOX cluster	478	chr12	+	54392875	54393353		GACGCCCCACTTAAGTTGTGTAGATCTCTCCTACACTTCTTCAAGCTGGCAAAGAAAGAT
CUST_65_PI426075208	125.335	163.336	135.071	115.688	143.721	160.68	153.479	7.06355	7.41796	7.19981	6.74209	7.14773	7.28815	7.12675	P	P	P	P	P	P	P	noncoding	nc-HOXB9-188+	nc-HOXB9-188	HOX cluster	98	chr17	+	46719077	46719175		GGCCAGGCGCGTCTCCGTTCCCCATCTTTACGGGGAGGTTAATGACCTCCTCAGCGCCCC
ASHG19A3H0000189	889.803	853.604	886.771	539.35	774.223	742.036	774.866	9.69238	9.65334	9.7503	9.10346	9.69434	9.60739	9.58826	P	P	P	P	P	P	P	noncoding	nc-HOXD4-25-	nc-HOXD4-25	HOX cluster	228	chr2	+	177001718	177001946		TCCCCTACATTTCCCGGGGAAGTGGGGGGTCGCTGTCTAAGCCCCTTCCCCCAATCACTT
ASHG19A3A034087	7092.79	6895.09	6442.07	5319.84	5159.73	5395.49	5416.39	12.597	12.5813	12.5248	12.5077	12.4803	12.5215	12.4608	P	P	P	P	P	P	P	noncoding	ENST00000434063	HOTAIRM1	Ensembl	659	chr7	+	27135724	27139773		TGCCTCTATTACCAATTTAAATCTATGGCTTGAACCTGTGCACTGAAAATCAAATCCTTT
ASHG19A3A034087	7092.79	6895.09	6442.07	5319.84	5159.73	5395.49	5416.39	12.597	12.5813	12.5248	12.5077	12.4803	12.5215	12.4608	P	P	P	P	P	P	P	noncoding	ENST00000434063	HOTAIRM1	Ensembl	659	chr7	+	27135724	27139773		TGCCTCTATTACCAATTTAAATCTATGGCTTGAACCTGTGCACTGAAAATCAAATCCTTT
ASHG19A3H0000127	62.5084	72.1027	62.1174	92.1127	63.8229	66.4234	74.8611	6.09354	6.30216	6.12969	6.41681	5.93813	5.97219	6.04134	P	P	P	P	P	P	P	noncoding	nc-HOXC5-253-	nc-HOXC5-253	HOX cluster	278	chr12	+	54425091	54425369		ACAAAATTCCTTCTTCATTACAGCTCCAGCCGGGCTGGTTCCTTACTTTTCTCTCCTCAA
ASHG19A3H0000090	66.1815	63.0553	47.8573	77.9938	17.6487	72.864	26.7043	6.17823	6.11992	5.77091	6.16631	4.00005	6.10759	4.47767	P	P	P	P	P	P	P	noncoding	nc-HOXB4-168-	nc-HOXB4-168	HOX cluster	1808	chr17	-	46657690	46659498		GTCTGAGATTACCTATTGGACCCTCTCTTGGCAAAGACAACCATAGTGTGATAGTTTGCT
CUST_52_PI426075208	99.632	102.649	99.1266	141.501	78.8278	53.5408	63.9793	6.75652	6.78852	6.77277	7.04803	6.24892	5.64916	5.8064	P	P	P	P	P	P	P	noncoding	nc-HOXB4-174+	nc-HOXB4-174	HOX cluster	338	chr17	+	46666090	46666428		TGTCCCTTAATGAGAAAAAGGGAGTCTTATGACCCCATCCTTGTCCCAAAGATCAGAAGC
CUST_25_PI426075208	1641.25	1559.08	1587.6	832.301	1124.41	1046.42	1158.76	10.5338	10.4673	10.548	9.76836	10.253	10.1226	10.2058	P	P	P	P	P	M	P	noncoding	nc-HOXA4-63+	nc-HOXA4-63	HOX cluster	108	chr7	+	27176447	27176555		TTCTGGGGCTTAGAATGGCTGGGGCTGTGGATCCCCTCCCCTACTTGGGTGGGAGCTTAG
CUST_75_PI426075208	2908.5	3302.03	2698.62	2347.02	1374.14	1084.34	1224.27	11.3519	11.5361	11.3043	11.3057	10.5576	10.1809	10.2926	P	P	P	P	P	P	P	noncoding	nc-HOXB9-204+	nc-HOXB9-204	HOX cluster	198	chr17	+	46800195	46800393		AGGAGAGAAGGTAATGGTGGAATTCTTTCCCTCACTCTCCCCCGACCACTTCGTCCCCTC
ASHG19A3A014670	183.165	171.267	165.902	80.8591	88.6509	71.014	73.2889	7.57757	7.48203	7.47489	6.22228	6.41998	6.07249	6.00631	P	P	P	P	P	P	P	noncoding	ENST00000417086	AC009336.23	Ensembl	984	chr2	-	177040721	177053268		CGACCGGGGGCTGCCTGGGCAAGGGCGGGGCGAGAGGGCAGAACGCCTGCTCTCGGACAG
ASHG19A3H0000059	13.3802	5.42953	14.6643	17.3681	20.3905	14.3662	22.9699	3.91928	2.42317	4.13455	3.88275	4.22513	3.63574	4.24616	A	A	A	P	P	P	P	noncoding	nc-HOXB8-182-	nc-HOXB8-182	HOX cluster	158	chr17	-	46692789	46692947		AAGACTCCAATTGCCTCGTTAAAATCGCGAAATTAACAGCGTGCCTACGCCTGGCGCGTT
CUST_171_PI426075208	52.2217	53.0211	45.9816	72.0068	46.6274	59.0172	64.0982	5.84322	5.88584	5.71609	6.04093	5.46307	5.78891	5.80977	P	P	P	P	P	P	P	noncoding	nc-HOXD10-9+	nc-HOXD10-9	HOX cluster	178	chr2	-	176976808	176976986		TTCAAATACATTCCCCGTTTTACAACGCCTTGAAGTATAAACGTTTCCCCCGAGTGCCTG
ASHG19A3H0000191	124.357	99.4477	112.839	244.906	363.604	182.014	383.904	7.05304	6.74585	6.95236	7.88592	8.54213	7.47329	8.51522	P	P	P	P	P	P	P	noncoding	nc-HOXD4-28-	nc-HOXD4-28	HOX cluster	248	chr2	+	177005928	177006176		CAGCGACACCTTACTTAAATAATGCTCTGACCCAATCCCACTGATCCTCCGTTATCTCTT
CUST_88_PI426075208	706.447	743.117	674.703	3894.7	3841.33	3996.8	4082.32	9.39067	9.46023	9.37936	12.0388	12.0542	12.0824	12.041	P	P	P	P	P	P	P	noncoding	nc-HOXB2-162+	nc-HOXB2-162	HOX cluster	178	chr17	+	46623286	46623464		TTAACTTAGAGCACTCTCAAAGTTCAGATCAGCGTTATGTGTGTGCATGAGTGTGGTGGG
CUST_186_PI426075208	25.0945	27.358	25.8053	74.0882	29.4573	17.2714	33.1788	4.81895	5.00758	4.91842	6.08686	4.77318	3.93145	4.81155	A	P	P	P	P	P	P	noncoding	nc-HOXD3-45+	nc-HOXD3-45	HOX cluster	618	chr2	-	177028029	177028647		TATCAGATGCTTTCCCTGAGTTTATTCATTCCGGTAAGTATCCACCACACTCTTGGCCCT
ASHG19A3H0000087	150.409	167.821	153.12	352.558	195.368	129.662	171.995	7.30754	7.45195	7.37208	8.44866	7.60972	6.96046	7.2942	P	P	P	P	P	P	P	noncoding	nc-HOXB2-161-	nc-HOXB2-161	HOX cluster	418	chr17	-	46622846	46623264		ATCTCACTCCTATGTGTCTGCCTGGGAGTTCCTGTCCATTTCCCAAGATTTAACTGTTGT
ASHG19A3H0000073	585.342	479.703	570.024	527.312	675.968	410.648	761.609	9.13292	8.87192	9.14046	9.07208	9.50192	8.69942	9.56315	P	P	P	P	P	P	P	noncoding	nc-HOXB9-202-	nc-HOXB9-202	HOX cluster	108	chr17	-	46796109	46796217		CTGTCCTACCCGTCCCCACCAATTTGCCTTTTACCTGCCGCAGAGCTTGCTTGAACCAAA
CUST_3_PI426075208	323.488	311.063	279.214	407.278	113.65	209.449	114.729	8.34907	8.28303	8.18272	8.66132	6.79443	7.68541	6.68219	P	P	P	P	P	P	P	noncoding	nc-HOXA11-83+	nc-HOXA11-83	HOX cluster	223	chr7	+	27224832	27225055		TGAAGTAGAAATTTGGAGACGTAAGCTGACGTGGAAATCTATCCCCATCCTTAGCAGGGA
ASHG19A3H0000021	38.429	40.7272	49.3409	66.6661	57.2253	64.806	67.5639	5.41217	5.53333	5.81298	5.92335	5.77334	5.93425	5.88584	P	P	P	P	P	P	P	noncoding	nc-HOXA1-59-	nc-HOXA1-59	HOX cluster	1265	chr7	-	27138707	27139972		TAATACATTTATTAAGGCGGCATGTTCAAAGTCTTCAATGGACAGCAACAAAACAGAAAG
ASHG19A3H0000071	64.2216	56.8554	49.9416	32.8442	65.0635	39.5384	59.3224	6.13287	5.98015	5.82796	4.85819	5.96368	5.19182	5.69188	P	P	P	P	P	P	P	noncoding	nc-HOXB9-200-	nc-HOXB9-200	HOX cluster	198	chr17	-	46795419	46795617		AAAAAACTATCCCGATCGCAGCAAGTAGAACACGGGTCTTAAAACACAGAGCTACTTTTA
CUST_142_PI426075208	174.825	161.038	129.794	465.027	131.262	405.057	216.084	7.5156	7.39918	7.14546	8.87276	7.01142	8.68279	7.6395	P	P	P	P	P	P	P	noncoding	nc-HOXC6-248+	nc-HOXC6-248	HOX cluster	948	chr12	-	54418111	54419059		TTTTATTTGGGGACAATATTTTCCAGAGGTCCTCCTTAGTTGTGTTCTCCCTGTCTCCTC
CUST_142_PI426075208	174.825	161.038	129.794	465.027	131.262	405.057	216.084	7.5156	7.39918	7.14546	8.87276	7.01142	8.68279	7.6395	P	P	P	P	P	P	P	noncoding	nc-HOXC6-248+	nc-HOXC6-248	HOX cluster	948	chr12	-	54418111	54419059		TTTTATTTGGGGACAATATTTTCCAGAGGTCCTCCTTAGTTGTGTTCTCCCTGTCTCCTC
ASHG19A3H0000010	67.5317	63.6357	54.0687	43.9121	51.0962	48.4451	61.4487	6.21018	6.13211	5.93544	5.29831	5.59507	5.49643	5.74277	P	P	P	P	P	P	P	noncoding	nc-HOXA11-92-	nc-HOXA11-92	HOX cluster	98	chr7	-	27232907	27233005		GCGACATAGGTCCTCCCCCAGGTACTGGGGTGTGAACTCGGAGAGCTACCTGATGTCGCG
ASHG19A3H0000169	282.22	263.735	245.181	23.0421	16.8111	19.9768	17.7454	8.1527	8.06161	7.9986	4.31884	3.92071	4.15843	3.83704	P	P	P	P	P	P	P	noncoding	nc-HOXD10-7-	nc-HOXD10-7	HOX cluster	388	chr2	+	176974318	176974706		GGTTTCTAGTAAAATGGAGGTTACAGCTTCAATACACTGTATGAATTCTCCTCTTTGAGG
ASHG19A3H0000196	121.964	94.1459	113.19	118.076	161.25	133.936	201.607	7.02629	6.67338	6.95548	6.77428	7.32491	7.01008	7.53779	P	P	P	P	P	P	P	noncoding	nc-HOXD4-33-	nc-HOXD4-33	HOX cluster	208	chr2	+	177012179	177012387		GGTATTGGTGGGGTATCTGGGCCTTGTCATTTTTCTGTGTGTTATATGTGTCTGCTTTAT
ASHG19A3H0000105	221.634	209.228	199.846	79.8042	117.738	101.722	132.073	7.83664	7.75559	7.73033	6.20238	6.84878	6.59567	6.89279	P	P	P	P	P	P	P	noncoding	nc-HOXC10-126-	nc-HOXC10-126	HOX cluster	228	chr12	+	54377223	54377451		ATAACCCCCATGCTGAGGCCACGGTGACCCTGCATATGAAAACACAAAACCATTTCAAAT
ASHG19A3H0000164	3083.47	2793.46	2563.32	1996.75	1520.55	1951.08	1427.16	11.4361	11.289	11.2352	11.0611	10.6979	11.0346	10.5149	P	P	P	P	P	M	M	noncoding	nc-HOXD10-10-	nc-HOXD10-10	HOX cluster	128	chr2	+	176977198	176977326		GGACCAAAGGCCCTGGGGCCTGCCGCTTGCCCCTCTCCCGGAGCTGGCCTCAGCTTTGGT
ASHG19A3H0000080	1266.43	1199.04	1126.94	148.12	231.23	236.239	279.047	10.1763	10.1105	10.0767	7.11623	7.86821	7.86869	8.03539	P	P	P	P	P	P	P	noncoding	nc-HOXA13-96-	nc-HOXA13-96	HOX cluster	318	chr7	-	27240358	27240676		TCAGTGTACACTGTGTGTGTGTGTGATGAGTCGTTCTGAGTCTATGGGTCTAAATGCAAA
CUST_117_PI426075208	291.1	301.941	275.079	454.646	157.542	107.373	166.486	8.19815	8.24157	8.16254	8.83139	7.28919	6.67701	7.24314	P	P	P	P	P	P	P	noncoding	nc-HOXC11-115+	nc-HOXC11-115	HOX cluster	298	chr12	-	54365184	54365482		ACAAAAAATTGTAGCTTGTCTCCATATGTAACCCCTAAAATCCATTCCTCCTCAATGCTC
CUST_39_PI426075208	89.3223	71.4717	75.409	96.6371	127.76	90.1313	119.129	6.59935	6.29175	6.39655	6.48539	6.97378	6.41549	6.74244	P	P	P	P	P	P	P	noncoding	nc-HOXA9-81+	nc-HOXA9-81	HOX cluster	198	chr7	+	27209607	27209805		GGAGGCCGTACTGGGGGAGGGGGAGGCCCCCATGCAGTCCAGCCCGGGTCCACCTAACCG
CUST_170_PI426075208	159.169	92.186	180.818	204.56	557.666	247.94	558.669	7.38432	6.64298	7.59744	7.60684	9.20136	7.94507	9.09874	P	P	P	P	P	P	P	noncoding	nc-HOXD10-8+	nc-HOXD10-8	HOX cluster	1788	chr2	-	176974818	176976606		TAAAGTGCAGTAGAGCCCTCACCACATTCTTTAACTTGAAGCGATAAATGCCGTGAGAGG
ASHG19A3H0000163	43.1722	31.9529	40.6702	55.2001	56.0031	44.6696	54.3956	5.57605	5.21269	5.5458	5.63942	5.73759	5.37777	5.56224	P	P	P	P	P	P	P	noncoding	nc-HOXC9-142-	nc-HOXC9-142	HOX cluster	400	chr12	+	54393475	54393875		CCTGGGGGTCCGAGAACCCTGGCTTCGGGGACTGGCATTTTCACCCCATTAAAAAATCCT
ASHG19A3A009654	22.5453	24.9345	21.2687	19.3117	24.3705	44.4659	40.1048	4.66081	4.88487	4.64931	4.04938	4.48405	5.36906	5.10218	A	P	P	P	P	P	P	noncoding	ENST00000480386	RP11-357H14.4	Ensembl	566	chr17	+	46706036	46712294		CCAAATTCTCTACTAGGCCTCCGAACCAAAACGAAGGAAAATCCGTTTTCTTCTTGGGCT
ASHG19A3A000361	1084.67	1124.21	977.6	1762.64	903.708	1662.68	961.943	9.96858	10.018	9.8831	10.8768	9.93388	10.8023	9.92214	P	P	P	P	P	P	P	noncoding	ENST00000455246	HOTAIR	Ensembl	918	chr12	-	54357532	54368731		CTGGGACAGAAGGAAAGCCCTCCAGCCTCCAGGCCCTGCCTTCTGCCTGCACATTCTGCC
ASHG19A3H0000165	4156.47	4114.74	4338.21	2576.44	3572.71	3770.63	3687.33	11.8588	11.8531	11.9868	11.4343	11.9454	11.993	11.9012	P	P	P	P	P	P	P	noncoding	nc-HOXD10-11-	nc-HOXD10-11	HOX cluster	118	chr2	+	176977568	176977686		ATCAGACCAGAACCTCTGGGGGCTGAAGACCTCTCCCCACCCCCATCTTACAAAGTGTGT
CUST_209_PI426075208	4142.97	4891.88	3823.46	6597.46	1369.1	2235.18	2171.56	11.8531	12.1028	11.8015	12.8196	10.5517	11.2377	11.127	P	P	P	P	P	P	P	noncoding	nc-HOXC9-139+	nc-HOXC9-139	HOX cluster	148	chr12	-	54391685	54391833		TGTCAATCAAAAAATCTCCCTCACTAGTTCAAGGAAAAGACAGGAGGTTCCAGTCCCCCT
CUST_201_PI426075208	237.114	216.043	232.915	152.391	139.03	136.376	147.76	7.92845	7.79684	7.9253	7.15948	7.09953	7.03471	7.07077	P	P	P	P	P	P	P	noncoding	nc-HOXD8-20+	nc-HOXD8-20	HOX cluster	328	chr2	-	176992588	176992916		CGAACGAATTGATTCTGACAATTAAGGATTTGTCCTTCAATCTTGCAAATGCCCAATTAA
ASHG19A3H0000190	305.733	236.756	296.916	236.715	373.542	276.095	422.728	8.26981	7.91977	8.26903	7.83289	8.58442	8.11003	8.65757	P	P	P	P	P	P	P	noncoding	nc-HOXD4-27-	nc-HOXD4-27	HOX cluster	398	chr2	+	177004548	177004946		TCGCTACTCATCTTGCCTTTATCTCAGCCTTCCCTGTATAGCTGAACAGTTCTACCTTTG
CUST_139_PI426075208	25.7733	24.8408	20.3578	33.4537	9.97092	20.534	31.2168	4.85911	4.87994	4.59339	4.88555	3.10584	4.20204	4.72046	A	P	P	P	A	P	P	noncoding	nc-HOXC6-245+	nc-HOXC6-245	HOX cluster	218	chr12	-	54416621	54416839		TATCCAGAATATTTTCAGCCCCCAGAATAGGGCCTCAAGAGGATGTCACATGAGGAAGAA
CUST_139_PI426075208	25.7733	24.8408	20.3578	33.4537	9.97092	20.534	31.2168	4.85911	4.87994	4.59339	4.88555	3.10584	4.20204	4.72046	A	P	P	P	A	P	P	noncoding	nc-HOXC6-245+	nc-HOXC6-245	HOX cluster	218	chr12	-	54416621	54416839		TATCCAGAATATTTTCAGCCCCCAGAATAGGGCCTCAAGAGGATGTCACATGAGGAAGAA
CUST_207_PI426075208	3097.83	3296.2	3153.22	2443.43	2826.3	2850.64	2546.78	11.4416	11.5313	11.5241	11.3568	11.6066	11.5895	11.3632	P	M	P	P	P	P	P	noncoding	nc-HOXC9-133+	nc-HOXC9-133	HOX cluster	108	chr12	-	54387975	54388083		AGCCCTGAGCCCTGGCGTTCCCACCCGAAGCCCCCAGTCCCCGCTGCCGCCGTCTTCTTC
CUST_23_PI426075208	5046.22	4821.21	4666	4493.56	3478.95	4502.64	3270.48	12.1241	12.0852	12.0802	12.2531	11.9032	12.2623	11.7288	P	P	P	P	P	P	P	noncoding	nc-HOXA4-61+	nc-HOXA4-61	HOX cluster	158	chr7	+	27170427	27170585		TCGAGCCGCTCCTCCCCAGCCCAGCGCGCGCCCCGCCCCGTGCCCCACGTGCAGCGCCCC
CUST_55_PI426075208	21.8389	19.0641	18.5687	26.3855	27.4327	22.9752	36.1524	4.61085	4.54762	4.46264	4.53127	4.66505	4.37559	4.94811	A	P	P	P	P	P	P	noncoding	nc-HOXB4-177+	nc-HOXB4-177	HOX cluster	108	chr17	+	46668510	46668618		TTTTCTTCCCTGCACCCCAGATCTATTGAGAATGGTGCAGGGTGTGCCCGGGATGGGAGA
ASHG19A3H0000019	62.6221	58.5904	55.6414	82.2741	86.6087	56.4072	92.6718	6.09646	6.01914	5.97506	6.24902	6.38621	5.72462	6.35563	P	P	P	P	P	P	P	noncoding	nc-HOXA1-57-	nc-HOXA1-57	HOX cluster	458	chr7	-	27137677	27138135		CTGTGTGCGAGTGCAAGCTCGTGATCCCAAGAAAAACACTCCACCCAGGATGCCCCAGAA
ASHG19A3H0000130	211.135	216.385	250.941	456.972	154.268	158.464	162.907	7.76986	7.79861	8.02922	8.84064	7.25679	7.26912	7.21229	P	P	P	P	P	P	P	noncoding	nc-HOXC5-256-	nc-HOXC5-256	HOX cluster	128	chr12	+	54426261	54426389		TGGGCATAGGCCACCTTACCTAACTTAATCCCCTTTCCTCAGCCATTTTTGAAGATTGGA
CUST_34_PI426075208	35.317	27.6295	19.4947	43.2486	37.3323	44.8142	30.2003	5.30101	5.02053	4.53376	5.26969	5.12835	5.38207	4.66767	A	P	P	P	P	P	P	noncoding	nc-HOXA7-74+	nc-HOXA7-74	HOX cluster	238	chr7	+	27197697	27197935		AATACAAAAGGTGGAGGGAGGGTTCAGATCGGGACGCCACGGAGCCCCAGTTCCTGCGCA
CUST_24_PI426075208	127.43	115.33	118.663	61.918	74.4985	61.6956	62.1572	7.08308	6.94401	7.02047	5.81472	6.16419	5.85484	5.76187	P	P	P	P	P	P	P	noncoding	nc-HOXA4-62+	nc-HOXA4-62	HOX cluster	148	chr7	+	27171207	27171355		AAGCAACACCTCCACAGAACCGAGCTTTGAAAACAATAACTTCCTATTTCAGAACTATCC
CUST_53_PI426075208	137.576	109.371	135.202	156.745	137.965	142.746	178.8	7.18861	6.8741	7.20103	7.20384	7.08631	7.10274	7.3538	P	P	P	P	P	P	P	noncoding	nc-HOXB4-175+	nc-HOXB4-175	HOX cluster	148	chr17	+	46667190	46667338		TTGGTAAAAATCAGGCACCCCCGACCGATGAGGCCTTAAGAAACTGAGAGCACTCATTTC
ASHG19A3H0000075	23.1358	12.1676	16.3912	36.3935	33.1347	27.2458	26.1535	4.70249	4.00174	4.29414	5.01254	4.94557	4.63253	4.44546	A	P	A	P	P	P	P	noncoding	nc-HOXB9-204-	nc-HOXB9-204	HOX cluster	198	chr17	-	46800195	46800393		GAGGGGACGAAGTGGTCGGGGGAGAGTGAGGGAAAGAATTCCACCATTACCTTCTCTCCT
ASHG19A3A014668	2114.26	2050.29	1940.48	164.07	157.307	141.088	184.28	10.9025	10.872	10.837	7.27556	7.2866	7.08652	7.39812	P	P	P	P	P	P	P	noncoding	uc002ukq.2	BC034000	UCSC_knowngene	690	chr2	-	176999570	177001826		GACACAAGAAGCTTGGATGTGAAATAGCACTTCCTTCTGTGTTACAGAATAAAACAATAT
CUST_4_PI426075208	869.719	835.671	878.646	25.9353	14.8879	104.673	5.00918	9.66536	9.62321	9.74016	4.50356	3.72861	6.63894	2.33662	P	P	P	A	A	P	P	noncoding	nc-HOXA11-86+	nc-HOXA11-86	HOX cluster	128	chr7	+	27228787	27228915		CGCTTCTTTCCACAGCCTTTGCAGGCGGAATATCGGAATAAAGTGGGTCCAGGCGCCTCT
CUST_96_PI426075208	2059.4	1708.98	1804.53	1236.69	1792.08	869.788	1939.43	10.8683	10.5909	10.7349	10.3614	10.9329	9.83148	10.9585	P	P	P	P	P	P	P	noncoding	nc-HOXC10-117+	nc-HOXC10-117	HOX cluster	238	chr12	-	54370554	54370792		GTCCCCTCCTTCCTTAAAAACAGTGTATAAAAATTCCAATACAGATTTCTCCTAGAGAAA
CUST_49_PI426075208	185.998	162.127	191.185	168.109	223.411	172.737	244.226	7.60236	7.40759	7.67169	7.31222	7.81269	7.39474	7.83269	P	P	P	P	P	P	P	noncoding	nc-HOXB4-171+	nc-HOXB4-171	HOX cluster	1148	chr17	+	46661680	46662828		TCTTTTGACTATTAAATAACTCCTTGGAAAAAGACGCGGAACCCACCTCCCGCATTTTCA
ASHG19A3H0000177	85.0687	72.8238	68.7366	172.209	189.784	170.887	189.219	6.53333	6.31583	6.2678	7.34848	7.56695	7.37712	7.43587	P	P	P	P	P	P	P	noncoding	nc-HOXD1-48-	nc-HOXD1-48	HOX cluster	138	chr2	+	177046473	177046611		CCTGTGGAGTACACACACACACACACATATATATAAATTATGCTAGTAAAAAGTGTCTCT
CUST_44_PI426075208	136.951	137.469	139.876	417.157	346.686	377.978	398.01	7.18498	7.18522	7.24729	8.70117	8.47585	8.57356	8.56787	P	P	P	P	P	P	P	noncoding	nc-HOXB2-164+	nc-HOXB2-164	HOX cluster	1039	chr17	+	46626206	46627245		TGGGAAAGTTGGAAGGGAACGTGTTTTGTGCCTTTTGGGTTTGAAATGTGTTTTCTTATT
CUST_120_PI426075208	121.25	98.1513	120.445	105.807	141.558	151.25	199.02	7.01909	6.72995	7.04128	6.61707	7.12669	7.19279	7.51657	P	P	P	P	P	P	P	noncoding	nc-HOXC12-104+	nc-HOXC12-104	HOX cluster	148	chr12	-	54344876	54345024		CCAACCCTGCAGCCCTGTCTGCCTTGCCCCTTCGGGGCAACTTAGGCTTGGGACCTGACT
ASHG19A3H0000076	1414.88	1303.63	1363.21	70.8779	32.3391	61.1191	26.7006	10.3285	10.2239	10.3402	6.01813	4.91219	5.84121	4.47743	P	P	P	P	P	P	P	noncoding	nc-HOXB9-205-	nc-HOXB9-205	HOX cluster	838	chr17	-	46802225	46803063		AGGAAGATGAGGTCGATTTCCTGATTTAAAAAATCGTCCAAGCCCCGTGGTCCAGCTTAA
ASHG19A3H0000133	77.9163	65.3697	60.4626	88.7022	103.683	80.281	125.866	6.41727	6.16906	6.09122	6.36027	6.65624	6.24467	6.81872	P	P	P	P	P	P	P	noncoding	nc-HOXC6-239-	nc-HOXC6-239	HOX cluster	538	chr12	+	54412141	54412679		GTCCTGGGCACTCGGGATCTCTCTAATAATTGGTGCTAATGGCCTGTTGTATAGTCTTAA
ASHG19A3H0000133	77.9163	65.3697	60.4626	88.7022	103.683	80.281	125.866	6.41727	6.16906	6.09122	6.36027	6.65624	6.24467	6.81872	P	P	P	P	P	P	P	noncoding	nc-HOXC6-239-	nc-HOXC6-239	HOX cluster	538	chr12	+	54412141	54412679		GTCCTGGGCACTCGGGATCTCTCTAATAATTGGTGCTAATGGCCTGTTGTATAGTCTTAA
ASHG19A3A047647	384.524	356.891	344.166	22.1187	7.05075	16.5325	13.6257	8.586	8.4749	8.47277	4.25727	2.67701	3.86409	3.40195	P	P	P	A	A	P	P	noncoding	ENST00000505700	AC012531.17	Ensembl	548	chr12	-	54392805	54393794		CCTCGGTCGTGGGCAAGTAGCTTGTTTTTACGTCCCTCAATAAAATTTTTATGAGGATCA
CUST_210_PI426075208	60.0774	74.981	73.6239	104.318	42.7257	93.3759	48.7512	6.03644	6.35563	6.36463	6.59471	5.3273	6.46908	5.39521	P	M	P	P	P	P	P	noncoding	nc-HOXD10-15+	nc-HOXD10-15	HOX cluster	130	chr2	-	176981368	176981498		TGTAATTGTGGATGCCTCTGCCGACCACATGACAACCAAGCCAATGAGATTTGAAAATGG
ASHG19A3H0000100	2011.24	1835.39	1839.64	719.453	584.914	516.048	610.767	10.8334	10.7023	10.7648	9.53675	9.27567	9.05457	9.22564	P	P	P	P	P	P	P	noncoding	nc-HOXC10-121-	nc-HOXC10-121	HOX cluster	248	chr12	+	54373384	54373632		CGCACCCCTCCAACCCACTGCACAAAGCAAAGACCCATAACCTTGACTCAGACTGCTGAT
ASHG19A3H0000192	29.8993	25.8998	22.5687	50.1893	24.179	12.7704	33.9406	5.0653	4.93335	4.72856	5.50215	4.47297	3.43821	4.84691	A	P	P	P	P	A	P	noncoding	nc-HOXD4-29-	nc-HOXD4-29	HOX cluster	288	chr2	+	177006956	177007244		AACCTATTGCTGTTGTGGGCCACATAGTCCTGGCCCATTGGGTCTCAGTGTCTGGCACCT
ASHG19A3A014672	222745	223343	214143	116604	168465	129725	155147	17.5312	17.6031	17.548	17.0516	17.4795	17.0926	17.3898	P	P	P	P	P	P	P	noncoding	ENST00000405359	AC016739.2	Ensembl	345	chr2	-	177065635	177065980		GCAAAGAAAGAAGAATCCAAGGAGTCTGATGATGACATGGGCCTTGGTCTTTTTGACTAA
ASHG19A3A034088	71.1242	55.1921	61.3152	54.1758	51.199	53.6886	61.9696	6.28706	5.93813	6.11313	5.61389	5.5982	5.65299	5.757	P	P	P	P	P	P	P	noncoding	ENST00000297027	AC010990.1	Ensembl	1962	chr7	+	27154966	27162503		TTTGCCCTGAAGTTCAGTGTAGTGGTTTGTTTGGGGCTTGCAGGAAGAAACAAACACACT
ASHG19A3A034088	71.1242	55.1921	61.3152	54.1758	51.199	53.6886	61.9696	6.28706	5.93813	6.11313	5.61389	5.5982	5.65299	5.757	P	P	P	P	P	P	P	noncoding	ENST00000297027	AC010990.1	Ensembl	1962	chr7	+	27154966	27162503		TTTGCCCTGAAGTTCAGTGTAGTGGTTTGTTTGGGGCTTGCAGGAAGAAACAAACACACT
CUST_173_PI426075208	159.365	78.7664	85.7327	229.38	72.4337	208.02	83.6194	7.38687	6.42385	6.58064	7.78534	6.11861	7.67495	6.20613	P	P	P	P	P	P	P	noncoding	nc-HOXD11-5+	nc-HOXD11-5	HOX cluster	228	chr2	-	176968692	176968920		ATGAATATTTACAACGGTTCCAGATTTCTCTTCCACCCGCCGGCATCCCGGAAGCCTCCT
CUST_185_PI426075208	2969.77	2870.52	2561.45	2072.86	1464.16	1919.52	1436.26	11.3788	11.3289	11.2342	11.115	10.647	11.0159	10.5266	P	P	P	P	P	P	P	noncoding	nc-HOXD3-44+	nc-HOXD3-44	HOX cluster	98	chr2	-	177027699	177027797		CCCCTCCCCCAAGCGCTCTTGGCTGGGCCGGGACCTGAGGGTGGTGCGGTGGAGGCCCGA
ASHG19A3A009655	736.755	660.986	740.103	1156.54	1172.87	733.97	1168.1	9.44223	9.29763	9.50163	10.2614	10.3187	9.59019	10.2151	P	P	P	P	P	P	P	noncoding	ENST00000478824	CTD-2377D24.6	Ensembl	1436	chr17	+	46782564	46784708		TATAAAGTAAAAAGATCTTTCTCTCACACTGTCTCCACCTCTCCTGGTCTCACCGTTGTG
CUST_145_PI426075208	126.419	74.8119	132.517	123.97	265.403	107.173	270.004	7.07337	6.3515	7.17312	6.85346	8.08486	6.67426	7.98362	P	P	P	P	P	P	P	noncoding	nc-HOXC6-251+	nc-HOXC6-251	HOX cluster	278	chr12	-	54421441	54421719		TAAAACCTGTTCCCCTGAGTAAGTAGAGTGTGGCTGAGAGTCTTGAATGTAGTAGGGATG
CUST_145_PI426075208	126.419	74.8119	132.517	123.97	265.403	107.173	270.004	7.07337	6.3515	7.17312	6.85346	8.08486	6.67426	7.98362	P	P	P	P	P	P	P	noncoding	nc-HOXC6-251+	nc-HOXC6-251	HOX cluster	278	chr12	-	54421441	54421719		TAAAACCTGTTCCCCTGAGTAAGTAGAGTGTGGCTGAGAGTCTTGAATGTAGTAGGGATG
CUST_145_PI426075208	126.419	74.8119	132.517	123.97	265.403	107.173	270.004	7.07337	6.3515	7.17312	6.85346	8.08486	6.67426	7.98362	P	P	P	P	P	P	P	noncoding	nc-HOXC6-251+	nc-HOXC6-251	HOX cluster	278	chr12	-	54421441	54421719		TAAAACCTGTTCCCCTGAGTAAGTAGAGTGTGGCTGAGAGTCTTGAATGTAGTAGGGATG
CUST_15_PI426075208	276.646	236.804	287.31	618.511	1247.21	494.493	1273.84	8.12447	7.92012	8.22367	9.30487	10.4054	8.9904	10.3521	P	P	P	P	P	P	P	noncoding	nc-HOXA13-97+	nc-HOXA13-97	HOX cluster	348	chr7	+	27241198	27241546		TTTAGCAGTTCTGGGTAAATATTGATTTGCCCCCAGTTTACCTTCTCCCTGACTGGCCAT
CUST_148_PI426075208	259.209	247.371	256.135	372.541	360.152	227.814	380.541	8.04258	7.97591	8.0595	8.52727	8.52707	7.81188	8.4998	P	P	P	P	P	P	P	noncoding	nc-HOXC8-143+	nc-HOXC8-143	HOX cluster	298	chr12	-	54397275	54397573		AATTATTACAATTAATTACAGCCAAGGAAAGCCATTCATGCCGTGCCTCTCCCGCGCACT
CUST_175_PI426075208	9311.08	8950.52	8838.59	8535.12	9219.39	8804.64	8532.24	12.9945	12.9533	12.9785	13.2056	13.3557	13.2439	13.1342	P	P	P	P	P	P	P	noncoding	nc-HOXD13-2+	nc-HOXD13-2	HOX cluster	188	chr2	-	176957160	176957348		CCATTCCCGCCCTCCCCCCCGACCCAGGCGTACGCGCTGCAGCCACCCCCACGAGTTGAT
CUST_16_PI426075208	86.9643	75.5331	84.337	313.936	289.026	157.996	298.317	6.56227	6.36603	6.55816	8.26371	8.20949	7.26478	8.13789	P	M	P	P	P	P	P	noncoding	nc-HOXA13-98+	nc-HOXA13-98	HOX cluster	208	chr7	+	27241728	27241936		TTTTTAAAATTCTCGCCTCTGACTCTGTTCGGCTGCCCAGAATTTTTTGGTGCCTTCGTG
ASHG19A3H0000044	695.44	710.206	634.932	561.76	493.274	535.692	532.874	9.37104	9.39671	9.2977	9.16432	9.02124	9.10934	9.02063	P	P	M	M	P	P	P	noncoding	nc-HOXB2-164-	nc-HOXB2-164	HOX cluster	1039	chr17	-	46626206	46627245		AATAAGAAAACACATTTCAAACCCAAAAGGCACAAAACACGTTCCCTTCCAACTTTCCCA
ASHG19A3H0000001	30.6817	32.8426	36.5221	31.3264	34.0722	33.8036	35.9869	5.09882	5.25066	5.39889	4.79068	4.98975	4.95455	4.94188	P	P	P	P	P	P	P	noncoding	nc-7-52-	nc-7-52	HOX cluster	148	chr7	-	27128937	27129085		ATTGTTCTGACTCACATATCTTAATTTTTTCCAAGACTCACTCATGTACCTAACACACAC
CUST_30_PI426075208	105.387	91.7756	90.7829	69.777	88.5303	58.3774	111.352	6.82731	6.6361	6.65256	5.99502	6.41727	5.7718	6.63617	P	P	P	P	P	P	P	noncoding	nc-HOXA6-70+	nc-HOXA6-70	HOX cluster	178	chr7	+	27191677	27191855		AGTGTGAATGGGTGAGTATGGGTAAGGGGGAGTATGCCCCTCTTAAAGCCTCCCTGGGTG
ASHG19A3A055142	2649.53	2415.72	2665.92	1422.63	2230.94	2360.41	2349	11.2129	11.0973	11.2873	10.5762	11.2581	11.3171	11.2461	P	P	P	P	P	P	P	noncoding	uc002inu.2	LOC404266	UCSC_knowngene	427	chr17	+	46679852	46683772		AGCCGCTTCCCTTGCCAGCCGCCAGCCGTTTCCTCTCCCTCGCCGGCCTCGGCGGAGATT
ASHG19A3H0000026	18.5773	10.2653	14.4896	11.2011	22.4003	23.8895	24.8863	4.37982	3.80343	4.11562	3.18921	4.35981	4.43859	4.37426	A	P	A	P	P	P	A	noncoding	nc-HOXA4-64-	nc-HOXA4-64	HOX cluster	138	chr7	-	27178897	27179035		CCCCCGGGTTGCAAGGTGGATCCTGGGCTGCTAGCGCCCACTGGACCCTGAGGACCAAGG
ASHG19A3H0000086	50.6563	37.4661	41.478	66.572	71.2323	45.6857	79.7316	5.80107	5.42359	5.57255	5.92067	6.09574	5.40948	6.13714	P	P	P	P	P	P	P	noncoding	nc-HOXA9-77-	nc-HOXA9-77	HOX cluster	678	chr7	-	27206497	27207175		TGCAGACACTTAAAATTGGGAGCCAGGGTTTCCTCCAGGGTTAATTTTTTAAATGAAAAT
ASHG19A3H0000148	41.1941	29.8676	40.781	69.7403	57.6311	38.4647	84.3857	5.50653	5.12047	5.55017	5.99433	5.78457	5.15162	6.22128	P	P	P	P	P	P	P	noncoding	nc-HOXC8-143-	nc-HOXC8-143	HOX cluster	298	chr12	+	54397275	54397573		AGTGCGCGGGAGAGGCACGGCATGAATGGCTTTCCTTGGCTGTAATTAATTGTAATAATT
ASHG19A3H0000121	3718.64	3483.58	3763.27	2289.5	2632.76	2246.27	2654.17	11.6918	11.6103	11.7775	11.2655	11.5033	11.2458	11.4211	P	P	P	P	P	P	P	noncoding	nc-HOXC12-105-	nc-HOXC12-105	HOX cluster	188	chr12	+	54348466	54348654		TTTTAGAAAATCAGTTCAGCAAATAAACCTGCCCCCGCCCTTTGTTACCCCACTCACCCC
CUST_159_PI426075208	21137.1	20457.6	21110.3	20040.1	20514.7	20856.6	20423.6	14.1229	14.1138	14.1959	14.4909	14.5063	14.5204	14.4108	P	P	P	P	P	P	P	noncoding	nc-HOXC9-137+	nc-HOXC9-137	HOX cluster	558	chr12	-	54389985	54390543		AGACAGGTTAGAGTCGTCCCCTCCCCCTGCCCCGCGCCTTCCTTTTAGTGATTTAAATTC
CUST_31_PI426075208	42.0798	35.6824	35.716	32.7793	44.7484	56.8006	53.8678	5.53843	5.3604	5.36383	4.8553	5.39947	5.735	5.54799	P	P	P	P	P	P	P	noncoding	nc-HOXA6-71+	nc-HOXA6-71	HOX cluster	218	chr7	+	27192547	27192765		AGGCGGGGTGGGGACCTTAAATCCCATTTCCTAGCCTGGGGCTGGGTTCAGGGCGCATGC
CUST_128_PI426075208	8894.89	8654.69	9321.07	6697.93	6355.92	5874.24	6436.88	12.9329	12.9063	13.0498	12.8422	12.7982	12.6546	12.7251	P	P	P	P	P	P	P	noncoding	nc-HOXC5-254+	nc-HOXC5-254	HOX cluster	128	chr12	-	54425551	54425679		CTGCAGCCATTCGGCCCCATCCTCTTCCCCCGTAGCCCCAAGTCTCATACTTCCCTGCCT
ASHG19A3H0000213	36.7277	36.9585	44.8504	108.901	113.191	104.904	95.5451	5.35129	5.40672	5.68291	6.65827	6.78886	6.64287	6.40109	P	P	P	P	P	P	P	noncoding	nc-HOXD8-21-	nc-HOXD8-21	HOX cluster	348	chr2	+	176993168	176993516		CGAGCAGGAGAGGGGAAAACACACACACACAACAGAGAACCATTGCATTTATTGGACATT
ASHG19A3H0000089	35.6826	64.6304	82.2858	165.325	63.0104	113.082	70.0319	5.31507	6.15206	6.52177	7.28771	5.92014	6.7505	5.94046	P	P	P	P	P	P	P	noncoding	nc-HOXB2-163-	nc-HOXB2-163	HOX cluster	208	chr17	-	46625816	46626024		GGACTCTTGGATGCTCTCTGTAGGTTTTTCTGTTTGGCCTGTATGCCTCTAGGTTTTTCA
CUST_50_PI426075208	98.7534	74.4719	93.9359	99.2094	45.5691	64.5293	52.0296	6.7437	6.34525	6.69928	6.52186	5.42899	5.9273	5.49583	P	P	P	P	P	P	P	noncoding	nc-HOXB4-172+	nc-HOXB4-172	HOX cluster	148	chr17	+	46663130	46663278		AATAGGGTATCCTCTATCATGCCTCCAAATCCCTCAAGAGGCGACGCCCCACACAGGCTG
ASHG19A3A014671	75.4519	69.2671	69.2475	91.4777	80.8662	61.9478	105.488	6.36809	6.24742	6.27604	6.40665	6.28643	5.86	6.55356	P	P	P	P	P	P	P	noncoding	Z49995		RNAdb	2615	chr2	-	177054646	177057266		CCTTTTCTTCTGTTTCATCCTGCGGTTCTGGAACCAGATTTTGACTTGCGTGTCATTCAG
ASHG19A3A014669	735.488	746.258	728.272	1069.89	984.578	998.217	1082.53	9.43964	9.46692	9.48031	10.1446	10.0639	10.054	10.1007	P	P	P	P	P	P	P	noncoding	uc002uku.2	BC047481	UCSC_knowngene	4061	chr2	-	177037925	177042841		TTCAATAGCTGGAAAGTAATCAAGTATCCCGAGAACCAATTTATGCACTAGACTCCAAAT
ASHG19A3H0000184	98.6172	108.628	112.293	129.853	184.71	189.405	243.943	6.74169	6.86337	6.94752	6.91722	7.52567	7.53418	7.83079	P	P	P	P	P	P	P	noncoding	nc-HOXD3-43-	nc-HOXD3-43	HOX cluster	368	chr2	+	177027239	177027607		CTGAAGGCTTTTCTGGTGGTCCAACTTTGGTTAACTTGGGGTCCTCTTTCCTTTCTTCTT
CUST_33_PI426075208	26565.3	23533.9	22481.3	4251.05	6807.95	11108.6	9450.34	14.4461	14.3063	14.2884	12.1728	12.8992	13.592	13.2777	P	P	P	P	P	P	P	noncoding	nc-HOXA7-73+	nc-HOXA7-73	HOX cluster	148	chr7	+	27196467	27196615		GCCCCCCCGCCGACTCCTGCTAGTGAGCCCTGGACCAAGCTTGGGATCCTCCCCATCCCT
ASHG19A3H0000210	30.8765	23.5697	30.7046	21.6248	38.502	52.8363	51.1528	5.10639	4.81234	5.15799	4.21977	5.17418	5.62766	5.46786	A	P	P	P	P	P	P	noncoding	nc-HOXD10-15-	nc-HOXD10-15	HOX cluster	130	chr2	+	176981368	176981498		CCATTTTCAAATCTCATTGGCTTGGTTGTCATGTGGTCGGCAGAGGCATCCACAATTACA
ASHG19A3H0000119	254.556	276.126	257.28	367.708	205.93	309.744	191.142	8.02035	8.12414	8.06638	8.5082	7.69167	8.28295	7.45489	P	P	P	P	P	P	P	noncoding	nc-HOXC12-103-	nc-HOXC12-103	HOX cluster	148	chr12	+	54343936	54344084		GTTCCTGTCCGCGCTCTCCCAGCCTAGCGAGCCCCGGGGTTGGTAGTCCATTCCCCACCC
CUST_61_PI426075208	1297.16	1266.03	1320.59	666.543	759.17	708.999	727.69	10.2164	10.1829	10.292	9.41966	9.66498	9.54209	9.49312	P	P	P	P	P	P	P	noncoding	nc-HOXB9-184+	nc-HOXB9-184	HOX cluster	198	chr17	+	46703989	46704187		AGGGACGCAGGCTGTAGAGCCCTCTCCCCAGGCGGGTCGGGGAGGGAGGGAGAGCAAGGG
ASHG19A3H0000017	51.2429	43.9049	51.9295	21.834	30.8987	26.8654	49.1829	5.8162	5.63329	5.88117	4.23497	4.84703	4.61263	5.40804	P	P	P	P	P	P	P	noncoding	nc-HOXA13-99-	nc-HOXA13-99	HOX cluster	148	chr7	-	27242338	27242486		AAAAAGTCCAGATAAATTTGATCAATAAGGTGCACCATAAATCTCAAGAATTCAGTCCCC
ASHG19A3H0000041	37.5724	45.7015	42.0436	74.9864	35.9998	62.5477	34.0453	5.38207	5.68844	5.59125	6.10368	5.07267	5.87745	4.85173	P	P	P	P	P	P	P	noncoding	nc-HOXB1-159-	nc-HOXB1-159	HOX cluster	608	chr17	-	46618416	46619024		CAGAGCTTTCTCTGAATGCAGACCCACCAGTCTTGACCAACAACTTCATTTCACGTATCA
CUST_158_PI426075208	260.717	299.154	224.27	296.497	137.92	241.291	157.418	8.05047	8.22829	7.87747	8.17625	7.08578	7.90154	7.16185	P	P	P	P	P	P	P	noncoding	nc-HOXC9-132+	nc-HOXC9-132	HOX cluster	148	chr12	-	54386125	54386273		TAACCTACCAACACCCCAAACATGTCCTTCCCCTGGAGATGGAGCTATAGAAGGGGAAGG
ASHG19A3H0000107	1489.11	1402.74	1370.18	8279.42	13360.1	13805.3	14131.5	10.4017	10.321	10.3471	13.1535	13.9045	13.9101	13.8696	P	P	P	P	P	P	P	noncoding	nc-HOXC10-128-	nc-HOXC10-128	HOX cluster	158	chr12	+	54378343	54378501		CCACAAACCTCACCCCACTCCCATCCCCAAGGTAAGAAGTGGGAGTCGGGTCCGGGGATA
CUST_195_PI426075208	34762.3	34336.4	31710.2	29135	36065.1	39894.6	35072.8	14.8346	14.8386	14.7912	15.0317	15.3087	15.4602	15.1889	P	P	P	P	P	P	P	noncoding	nc-HOXD4-32+	nc-HOXD4-32	HOX cluster	118	chr2	-	177011899	177012017		AGCCGCTCCATCTGCCCCTCACCCCTGCTTCCTATCTCTCCCACCCTGGGAGCAATTCAG
ASHG19A3A008515	27.0332	5.13842	34.4049	22.3489	20.467	15.7393	16.0651	4.92543	2.32756	5.31014	4.2706	4.23109	3.78122	3.67812	A	P	P	A	P	P	P	noncoding	ENST00000438772	AC036222.1	Ensembl	595	chr17	-	46710868	46724152		TTCATCAACACGGTGAAGTTTTATTGTATTTCCGGTCCCCAAGATTTATACCCGGGAGGG
CUST_183_PI426075208	188.181	175.422	160.175	269.181	661.695	723.805	756.058	7.62031	7.5157	7.42618	8.02999	9.46834	9.5721	9.55275	P	P	P	P	P	P	P	noncoding	nc-HOXD3-42+	nc-HOXD3-42	HOX cluster	178	chr2	-	177026009	177026187		TTTTCAGCCCATTCTCCTAAGTGCACATTTAGCCCCCAAATATTTCCTCCAGCACTCAAT
CUST_2_PI426075208	233.425	258.097	250.836	266.609	79.2974	197.86	174.319	7.90733	8.03208	8.02817	8.01395	6.25654	7.59497	7.31171	P	P	P	P	P	P	P	noncoding	nc-HOXA10-82+	nc-HOXA10-82	HOX cluster	370	chr7	+	27220757	27221127		TTTCCAAATGTTGCAAGAGATTAAAAAGACCATTCTCAATACCTTTTCCACCCCCTCCAA
CUST_198_PI426075208	139.941	130.692	152.54	104.246	230.561	238.645	280.055	7.21197	7.11707	7.36541	6.59334	7.86343	7.88364	8.03971	P	P	P	P	P	P	P	noncoding	nc-HOXD4-35+	nc-HOXD4-35	HOX cluster	188	chr2	-	177015499	177015687		TGAAGCTTGCTTTCTTCCCACAGGCCCCAAATACAAGCAAGCCCCCATTTGGGTACCTTT
ASHG19A3A009659	123.611	103.706	116.025	194.487	164.122	163.398	190.472	7.0443	6.80167	6.98838	7.53232	7.34864	7.31132	7.44864	P	P	P	P	P	P	P	noncoding	ENST00000495536	CTD-2377D24.4	Ensembl	532	chr17	+	46810452	46811250		TGAACTGCTTGGGGTCGCCCGGCTCCTCTCGATTTTATGAAAATGGCCTAATTGAGGTGT
CUST_167_PI426075208	29.2758	17.8142	33.669	25.3724	38.7499	52.0954	51.1295	5.03422	4.46306	5.27987	4.46654	5.18478	5.60368	5.46689	A	P	P	P	P	P	P	noncoding	nc-HOXD10-13+	nc-HOXD10-13	HOX cluster	668	chr2	-	176978968	176979636		TAAGGTACTGTTCAAAGCTAACAGCCACTGACCAGCGCCCTGAAATTTGCTTTCTCACAT
CUST_188_PI426075208	104.471	112.083	106.18	57.4459	87.3451	89.1888	107.049	6.81732	6.90806	6.87034	5.69768	6.39742	6.3986	6.57731	P	P	P	P	P	P	P	noncoding	nc-HOXD4-23+	nc-HOXD4-23	HOX cluster	178	chr2	-	176998758	176998936		GTCTTTATTTGAACACAAATCTATGCTCTTTCCCAGCTACAAAAGGAAACATTTACCTAC
CUST_202_PI426075208	5592.17	5206.34	4813.57	8463.06	4866.88	8165.21	4407.41	12.2779	12.2012	12.1236	13.1922	12.3928	13.128	12.1563	P	P	P	P	P	P	P	noncoding	nc-HOXD9-16+	nc-HOXD9-16	HOX cluster	558	chr2	-	176984428	176984986		AAGATACATTGTAATGTGCTTTTTAAGTCCCCCTCCCTCCAACTTGTGGGTTTTCTTAAT
CUST_140_PI426075208	126.811	139.704	81.7873	238.079	225.619	198.75	259.121	7.07771	7.2082	6.51248	7.84195	7.82904	7.60172	7.92285	P	P	P	P	P	P	P	noncoding	nc-HOXC6-246+	nc-HOXC6-246	HOX cluster	968	chr12	-	54416901	54417869		TCTCTGACTTAAGGTTAAAACGTAAAATAGGTCCCAAACATCTCTACCCCATCACGCTCA
CUST_140_PI426075208	126.811	139.704	81.7873	238.079	225.619	198.75	259.121	7.07771	7.2082	6.51248	7.84195	7.82904	7.60172	7.92285	P	P	P	P	P	P	P	noncoding	nc-HOXC6-246+	nc-HOXC6-246	HOX cluster	968	chr12	-	54416901	54417869		TCTCTGACTTAAGGTTAAAACGTAAAATAGGTCCCAAACATCTCTACCCCATCACGCTCA
CUST_135_PI426075208	55.5944	48.0665	27.5505	43.6754	49.8671	50.1666	67.6889	5.934	5.7568	5.00766	5.29047	5.56224	5.5478	5.88829	P	P	P	P	P	P	P	noncoding	nc-HOXC6-241+	nc-HOXC6-241	HOX cluster	208	chr12	-	54413201	54413409		ATAGAGGCCTCACCGGTCGGCGATTCCCACATTACTCCAGGAGAAAGGCTCCCTTTTTCG
CUST_135_PI426075208	55.5944	48.0665	27.5505	43.6754	49.8671	50.1666	67.6889	5.934	5.7568	5.00766	5.29047	5.56224	5.5478	5.88829	P	P	P	P	P	P	P	noncoding	nc-HOXC6-241+	nc-HOXC6-241	HOX cluster	208	chr12	-	54413201	54413409		ATAGAGGCCTCACCGGTCGGCGATTCCCACATTACTCCAGGAGAAAGGCTCCCTTTTTCG
ASHG19A3H0000140	17.9946	5.29807	14.5652	5	20.566	28.8747	24.0378	4.33521	2.33386	4.12434	2.32974	4.23761	4.72088	4.31769	A	P	A	P	P	P	A	noncoding	nc-HOXC6-246-	nc-HOXC6-246	HOX cluster	968	chr12	+	54416901	54417869		TGAGCGTGATGGGGTAGAGATGTTTGGGACCTATTTTACGTTTTAACCTTAAGTCAGAGA
ASHG19A3H0000140	17.9946	5.29807	14.5652	5	20.566	28.8747	24.0378	4.33521	2.33386	4.12434	2.32974	4.23761	4.72088	4.31769	A	P	A	P	P	P	A	noncoding	nc-HOXC6-246-	nc-HOXC6-246	HOX cluster	968	chr12	+	54416901	54417869		TGAGCGTGATGGGGTAGAGATGTTTGGGACCTATTTTACGTTTTAACCTTAAGTCAGAGA
ASHG19A3A047650	2525.1	4859.41	4557.42	8561.17	1384.8	6629.7	1510.57	11.1566	12.0948	12.0535	13.2118	10.5697	12.8291	10.5962	P	P	P	P	P	P	P	noncoding	ENST00000513381	RP11-834C11.5	Ensembl	499	chr12	-	54478915	54519614		AGCAATTTTCTCCCTCTCCAGGCCTCTTACAGATGTGAAACAACTGGCAGATCTGACTTT
CUST_29_PI426075208	44.4784	62.0105	64.6388	120.112	53.2264	95.1122	59.4711	5.61831	6.09798	6.18039	6.80312	5.65823	6.49604	5.69505	P	P	P	P	M	P	P	noncoding	nc-HOXA6-69+	nc-HOXA6-69	HOX cluster	128	chr7	+	27190967	27191095		TGGATTGGGGGGTCCCCCTATCGCCCAGACTCGGTTTGCGTCCTTCCTTCAACCTTAGCT
CUST_87_PI426075208	207.563	191.807	188.436	1125.3	1023.57	1106.75	1171.58	7.74757	7.63452	7.65226	10.2197	10.1179	10.2145	10.2197	P	P	P	P	P	P	P	noncoding	nc-HOXB2-161+	nc-HOXB2-161	HOX cluster	418	chr17	+	46622846	46623264		ACAACAGTTAAATCTTGGGAAATGGACAGGAACTCCCAGGCAGACACATAGGAGTGAGAT
ASHG19A3H0000170	78.83	433.196	79.1973	16.2621	5	11.2422	5	6.43538	8.73714	6.46787	3.77805	2.33128	3.23769	2.32841	P	P	P	A	A	A	P	noncoding	nc-HOXD10-8-	nc-HOXD10-8	HOX cluster	1788	chr2	+	176974818	176976606		CCTCTCACGGCATTTATCGCTTCAAGTTAAAGAATGTGGTGAGGGCTCTACTGCACTTTA
CUST_205_PI426075208	181.154	184.851	158.918	128.18	150.758	142.507	148.337	7.56239	7.58458	7.41572	6.90029	7.2202	7.10073	7.07636	P	P	P	P	P	P	P	noncoding	nc-HOXC10-129+	nc-HOXC10-129	HOX cluster	260	chr12	-	54378513	54378773		GCCCTTCCCCGCGAACAAAGGAAGCGCCCCCCGGGCGGCAGGGGAGGTAGAGGGGTGGAG
ASHG19A3H0000052	27.8497	22.294	23.6078	19.1843	27.4683	41.0096	43.0128	4.96301	4.74084	4.78676	4.0399	4.66736	5.24545	5.20966	A	P	P	P	P	P	P	noncoding	nc-HOXB4-174-	nc-HOXB4-174	HOX cluster	338	chr17	-	46666090	46666428		GCTTCTGATCTTTGGGACAAGGATGGGGTCATAAGACTCCCTTTTTCTCATTAAGGGACA
CUST_150_PI426075208	1194.16	1287.66	1243.56	593.718	1497.13	1352.04	1726.98	10.0937	10.2054	10.2067	9.24747	10.6794	10.5068	10.7855	P	P	P	P	P	P	P	noncoding	nc-HOXC8-145+	nc-HOXC8-145	HOX cluster	308	chr12	-	54399435	54399743		TTTTCTCTTTTTGTTACCCTCCCTTCTCCAATTAAGAGACTCTAAGCAAAGCAACTGCCG
ASHG19A3H0000111	72.481	70.146	59.9461	117.193	123.431	119.422	127.847	6.312	6.26511	6.07823	6.76183	6.91935	6.83889	6.84172	P	P	P	P	P	P	P	noncoding	nc-HOXC11-109-	nc-HOXC11-109	HOX cluster	1088	chr12	+	54358466	54359554		AAAAGGAGACAGTAGGGTCTCCCAACATCACCCTAAGCCCTACAAAATGGCTATTCCTAA
CUST_208_PI426075208	245.36	252.948	270.922	241.898	314.192	330.595	322.172	7.96939	8.00604	8.13724	7.86974	8.32804	8.37311	8.24771	P	P	P	P	P	P	P	noncoding	nc-HOXC9-135+	nc-HOXC9-135	HOX cluster	138	chr12	-	54389365	54389503		GCCTGGGAGTGGCTGGAGGGGGAGCCGCCCCAGAGCTAGAGCCGCTCCCTGCCCTGCCCG
CUST_71_PI426075208	18.7089	14.8415	82.3058	44.1679	13.4125	45.5246	14.0295	4.39118	4.23728	6.52227	5.30709	3.55162	5.4047	3.4499	A	P	M	A	A	P	P	noncoding	nc-HOXB9-200+	nc-HOXB9-200	HOX cluster	198	chr17	+	46795419	46795617		TAAAAGTAGCTCTGTGTTTTAAGACCCGTGTTCTACTTGCTGCGATCGGGATAGTTTTTT
ASHG19A3H0000102	245.226	233.012	154.669	92.0772	64.3685	79.6156	83.9629	7.96816	7.89954	7.38321	6.41657	5.94909	6.23088	6.21362	P	P	P	P	P	P	P	noncoding	nc-HOXC10-123-	nc-HOXC10-123	HOX cluster	148	chr12	+	54374923	54375071		GTAGCATCTGTGTGCAAGTGTGTGCAATGTCAAGACGTGAGAGATTCTGCTGGCCGAGCT
ASHG19A3A000446	97.0345	102.308	94.1542	104.828	102.973	104.421	121.823	6.71776	6.78317	6.70352	6.60331	6.64391	6.63493	6.77539	P	M	P	P	P	P	P	noncoding	ENST00000504891	RP11-834C11.6	Ensembl	528	chr12	+	54475901	54496477		CTGGCCCTCTTATAAAAAAAAGAAAGAAAAGCCTTGTTTTCTCTAGATCAGAGAGATGGC
CUST_93_PI426075208	684.164	699.528	658.841	1031.6	912.564	854.484	1028.55	9.34832	9.37362	9.3451	10.0861	9.94716	9.80844	10.0265	P	P	P	P	P	P	P	noncoding	nc-HOXB9-192+	nc-HOXB9-192	HOX cluster	318	chr17	+	46767765	46768083		TTTCTGGAATGTCAACAGTCTGATTGCTGAGAATGGTCTTCATTCTCGCAGTAGACGTGG
ASHG19A3H0000132	30.95	23.6948	21.026	25.4372	26.3671	24.4658	30.9042	5.10924	4.81939	4.63591	4.47166	4.60291	4.47269	4.70462	A	M	P	P	P	P	M	noncoding	nc-HOXC6-238-	nc-HOXC6-238	HOX cluster	238	chr12	+	54411811	54412049		GTGGGGGTGGGGGATGCTGTACTCAAAAGCCATCTTGTGCTCAGAGAAAAGAGGCCTACC
ASHG19A3H0000132	30.95	23.6948	21.026	25.4372	26.3671	24.4658	30.9042	5.10924	4.81939	4.63591	4.47166	4.60291	4.47269	4.70462	A	M	P	P	P	P	M	noncoding	nc-HOXC6-238-	nc-HOXC6-238	HOX cluster	238	chr12	+	54411811	54412049		GTGGGGGTGGGGGATGCTGTACTCAAAAGCCATCTTGTGCTCAGAGAAAAGAGGCCTACC
CUST_156_PI426075208	69.5206	69.4178	60.2688	48.7706	53.8363	50.5139	58.8957	6.25008	6.25134	6.08583	5.45537	5.67733	5.55849	5.68063	P	P	P	P	P	P	P	noncoding	nc-HOXC9-130+	nc-HOXC9-130	HOX cluster	151	chr12	-	54384062	54384213		TCAGCCTCTTCGGGGGAGGGGTGTTGCTAAAAATCACTAAAAACAAAAAACCATCCATTT
ASHG19A3H0000193	23.2936	27.4099	29.2819	86.7973	23.3363	60.0142	21.2223	4.71237	5.01029	5.09426	6.32849	4.41987	5.81319	4.12031	A	P	P	P	P	P	P	noncoding	nc-HOXD4-30-	nc-HOXD4-30	HOX cluster	108	chr2	+	177009879	177009987		GTCAATTCTCTTTTTATTTATGCTCCTTGGTGGGAGCTGAGGGCATCTTTCCCTCTCTCT
ASHG19A3H0000206	25.0336	24.9719	16.4669	52.264	18.5711	35.0142	17.3423	4.81523	4.88683	4.30046	5.56395	4.0828	5.00824	3.80053	A	P	A	P	P	P	P	noncoding	nc-HOXC4-154-	nc-HOXC4-154	HOX cluster	1349	chr12	+	54408830	54410179		CATCTCGCTCATTGCTCCTTGAATTTATTATTCTAATCTCAACCGTAGAGCTGGAATAAT
CUST_197_PI426075208	1381.73	1395.18	1549.62	1300.14	1176.28	1560.91	1139.9	10.2992	10.3128	10.5156	10.437	10.3244	10.7093	10.1821	P	P	P	P	P	P	P	noncoding	nc-HOXD4-34+	nc-HOXD4-34	HOX cluster	158	chr2	-	177012419	177012577		TTCTATCCGCCCACTCCGCTGGCTTGGCCCCTTAGCCCACCACTTCCCCGCGATCAGTAC
ASHG19A3H0000179	6899.87	6745.56	7845.35	2469.31	6103.73	6539.82	7198.49	12.5623	12.556	12.8062	11.3705	12.7364	12.8146	12.8809	P	P	P	P	P	P	P	noncoding	nc-HOXD3-37-	nc-HOXD3-37	HOX cluster	168	chr2	+	177017979	177018147		AAATGAAGGTTGGATGCTTTATCCCACTGTGAATTTGGACATTCTCCCCCACTCCACCCC
CUST_141_PI426075208	236.836	213.272	268.44	332.888	324.886	323.43	317.917	7.92674	7.7801	8.12371	8.35772	8.3809	8.34354	8.23121	P	P	P	P	P	P	P	noncoding	nc-HOXC6-247+	nc-HOXC6-247	HOX cluster	138	chr12	-	54417941	54418079		AGTCTCACTTTTCTGAGCAAGAGAAGAACGGTTGCCCCGCTGGCCCCTTTTGTGCCACTG
CUST_141_PI426075208	236.836	213.272	268.44	332.888	324.886	323.43	317.917	7.92674	7.7801	8.12371	8.35772	8.3809	8.34354	8.23121	P	P	P	P	P	P	P	noncoding	nc-HOXC6-247+	nc-HOXC6-247	HOX cluster	138	chr12	-	54417941	54418079		AGTCTCACTTTTCTGAGCAAGAGAAGAACGGTTGCCCCGCTGGCCCCTTTTGTGCCACTG
CUST_200_PI426075208	33.2049	20.0331	23.7989	16.1362	17.9376	22.8223	15.458	5.2113	4.60884	4.79924	3.76606	4.02393	4.36607	3.61419	A	P	P	A	P	P	P	noncoding	nc-HOXD8-19+	nc-HOXD8-19	HOX cluster	160	chr2	-	176989526	176989686		TCAGGTCAGCATTTATTAGTAGGAAGCAGTAACATTTACAACTGGTCCTCGGGCAGGAAC
ASHG19A3H0000103	139.258	156.334	142.142	90.2397	150.676	167.362	181.715	7.20699	7.35993	7.27062	6.38861	7.21864	7.34546	7.37761	P	P	P	P	P	P	P	noncoding	nc-HOXC10-124-	nc-HOXC10-124	HOX cluster	248	chr12	+	54376443	54376691		CTCCTCCCTGGAGTATTATTTTCATTAATGATGGCGATAATTCCGAAGCGACTCTGTCCT
CUST_64_PI426075208	37.221	28.2845	32.8016	24.9353	30.8401	26.2281	37.7965	5.36854	5.04974	5.24655	4.44002	4.84336	4.57457	5.01225	P	P	P	P	P	P	P	noncoding	nc-HOXB9-187+	nc-HOXB9-187	HOX cluster	168	chr17	+	46715907	46716075		GTGGTATGGGGGGTGGGGGTGAGTGGCAAGGAGGAAACCTGCTTTGTTCACAGAGAGCCA
CUST_70_PI426075208	223.286	118.603	293.953	173.27	156.851	151.238	120.598	7.84642	6.9817	8.25467	7.35527	7.28148	7.19254	6.76013	P	P	M	P	P	P	P	noncoding	nc-HOXB9-197+	nc-HOXB9-197	HOX cluster	198	chr17	+	46783424	46783622		ATCTTTTCTGGAACTGAACATCCATCCTTAAGGCCAGATTTCTCCCATCACCAACTTTAA
CUST_21_PI426075208	10278.7	9904.18	9517	8901.96	8518.05	8786.67	9585.26	13.1326	13.095	13.0819	13.2785	13.2386	13.2411	13.307	M	P	P	P	P	P	P	noncoding	nc-HOXA1-59+	nc-HOXA1-59	HOX cluster	1265	chr7	+	27138707	27139972		CTTTCTGTTTTGTTGCTGTCCATTGAAGACTTTGAACATGCCGCCTTAATAAATGTATTA
CUST_108_PI426075208	24.006	12.6563	19.9584	13.1329	30.6454	33.5102	36.4508	4.75533	4.04626	4.56566	3.43295	4.83297	4.94041	4.96003	A	P	P	P	P	P	A	noncoding	nc-HOXC11-106+	nc-HOXC11-106	HOX cluster	158	chr12	-	54351436	54351594		TCATTCTCACGGGCCTGGGAAACTGGGGCTGAGTGGGACCTCAATGGCTGGTAGCCCCTT
CUST_99_PI426075208	35.8047	37.0154	39.0394	51.7578	57.1415	54.0384	49.6437	5.31986	5.40884	5.49162	5.54909	5.7702	5.6617	5.42161	P	P	P	P	P	P	P	noncoding	nc-HOXC10-120+	nc-HOXC10-120	HOX cluster	208	chr12	-	54372104	54372312		GGTCTGAGTGTGTTGGGAGAGCCAAGACCCTCCACTACAGGTTTGTTTACTATTTAGGGC
CUST_107_PI426075208	34.9759	31.0882	23.9304	66.3886	34.2704	66.4818	37.806	5.28628	5.17474	4.80694	5.9162	4.9971	5.97374	5.01275	P	P	P	P	P	P	P	noncoding	nc-HOXC10-128+	nc-HOXC10-128	HOX cluster	158	chr12	-	54378343	54378501		TATCCCCGGACCCGACTCCCACTTCTTACCTTGGGGATGGGAGTGGGGTGAGGTTTGTGG
CUST_102_PI426075208	12.6951	20.5745	23.201	43.046	25.0193	39.4511	24.1942	3.84737	4.64428	4.76467	5.26295	4.52188	5.18887	4.32715	A	A	P	P	P	P	P	noncoding	nc-HOXC10-123+	nc-HOXC10-123	HOX cluster	148	chr12	-	54374923	54375071		AGCTCGGCCAGCAGAATCTCTCACGTCTTGACATTGCACACACTTGCACACAGATGCTAC
CUST_144_PI426075208	28.3307	56.5905	24.7569	96.0778	20.9183	86.836	29.0099	4.98673	5.97389	4.85604	6.47668	4.26329	6.35811	4.60884	P	P	P	P	P	P	P	noncoding	nc-HOXC6-250+	nc-HOXC6-250	HOX cluster	1518	chr12	-	54419861	54421379		TAGACACCAATGTGAGTTGCTTTTTGCCCTAGAATCCAGCTGTCCTCGAATTCATGGCAT
CUST_144_PI426075208	28.3307	56.5905	24.7569	96.0778	20.9183	86.836	29.0099	4.98673	5.97389	4.85604	6.47668	4.26329	6.35811	4.60884	P	P	P	P	P	P	P	noncoding	nc-HOXC6-250+	nc-HOXC6-250	HOX cluster	1518	chr12	-	54419861	54421379		TAGACACCAATGTGAGTTGCTTTTTGCCCTAGAATCCAGCTGTCCTCGAATTCATGGCAT
CUST_144_PI426075208	28.3307	56.5905	24.7569	96.0778	20.9183	86.836	29.0099	4.98673	5.97389	4.85604	6.47668	4.26329	6.35811	4.60884	P	P	P	P	P	P	P	noncoding	nc-HOXC6-250+	nc-HOXC6-250	HOX cluster	1518	chr12	-	54419861	54421379		TAGACACCAATGTGAGTTGCTTTTTGCCCTAGAATCCAGCTGTCCTCGAATTCATGGCAT
ASHG19A3H0000009	347.896	357.809	397.514	242.75	241.658	212.012	162.816	8.44946	8.47871	8.67079	7.87458	7.93794	7.70373	7.21137	P	P	M	P	P	P	P	noncoding	nc-HOXA11-91-	nc-HOXA11-91	HOX cluster	118	chr7	-	27232517	27232635		GAGAATAATCGGGTATTTAATCTCTCCCGGTCTTAATTCTTGGCAGCGTGGAAGGTGGTT
ASHG19A3A014667	256.632	243.359	260.608	149.512	152.828	145.606	168.767	8.03047	7.95573	8.08344	7.1306	7.24244	7.13517	7.26253	P	P	P	P	P	P	P	noncoding	uc002ukl.1	AX747372	UCSC_knowngene	641	chr2	-	176992554	176993195		GTCCTTCAATCTTGCAAATGCCCAATTAAAAGATTATTATTGTCAATAAAGCCTTGGAGC
ASHG19A3H0000097	440.005	369.948	453.293	81.9093	215.204	241.437	279.75	8.76865	8.52778	8.83836	6.24179	7.75827	7.90369	8.03806	P	P	P	P	P	P	P	noncoding	nc-HOXC10-118-	nc-HOXC10-118	HOX cluster	118	chr12	+	54371444	54371562		AGGAATGCAACTGAGGGGCCTCTGTACATTTTTGTGTGTGTATGTGTGTGTGACACTTCT
ASHG19A3H0000109	170.695	235.939	192.83	397.999	162.774	240.801	175.383	7.48401	7.91329	7.68413	8.62745	7.33859	7.89715	7.32196	P	P	P	P	M	P	P	noncoding	nc-HOXC11-107-	nc-HOXC11-107	HOX cluster	148	chr12	+	54352146	54352294		CCAGCAGAATGGAGATAAAATCACATGCCTCCATCCCCCGCTGGGTATCTGACACCTGAC
ASHG19A3H0000079	152.941	137.21	153.88	103.085	190.248	226.63	240.669	7.33144	7.18234	7.3785	6.5782	7.57014	7.80343	7.80861	P	P	P	P	P	P	P	noncoding	nc-HOXA11-85-	nc-HOXA11-85	HOX cluster	1838	chr7	-	27226847	27228685		GCAACTAAAAGTGTTCGGCCACTCCAGGCGTTTTCCCTTCTGCTGATATCAAAAACCTTT
ASHG19A3H0000145	24.6965	28.4934	33.6773	89.2089	51.9215	62.5725	47.0697	4.79411	5.06086	5.28036	6.37031	5.62173	5.87797	5.34647	P	P	P	P	P	P	P	noncoding	nc-HOXC6-251-	nc-HOXC6-251	HOX cluster	278	chr12	+	54421441	54421719		CATCCCTACTACATTCAAGACTCTCAGCCACACTCTACTTACTCAGGGGAACAGGTTTTA
ASHG19A3H0000145	24.6965	28.4934	33.6773	89.2089	51.9215	62.5725	47.0697	4.79411	5.06086	5.28036	6.37031	5.62173	5.87797	5.34647	P	P	P	P	P	P	P	noncoding	nc-HOXC6-251-	nc-HOXC6-251	HOX cluster	278	chr12	+	54421441	54421719		CATCCCTACTACATTCAAGACTCTCAGCCACACTCTACTTACTCAGGGGAACAGGTTTTA
ASHG19A3H0000118	2286.05	2282.51	2085.88	1639	2310.66	2229.85	2548.78	11.0181	11.0171	10.9381	10.7725	11.3125	11.2332	11.3668	P	P	P	P	P	P	P	noncoding	nc-HOXC11-116-	nc-HOXC11-116	HOX cluster	228	chr12	+	54366534	54366762		CCATACATGAGAGCCCTCCTCCTTCCCCCAATCCTGGGGGAAAAAAGAGCAGCAGCTAGA
CUST_37_PI426075208	23.2066	14.329	16.6732	15.7116	19.1542	25.7056	28.7895	4.70613	4.19464	4.31819	3.72659	4.13133	4.54372	4.59711	A	P	A	P	P	P	P	noncoding	nc-HOXA9-78+	nc-HOXA9-78	HOX cluster	348	chr7	+	27207527	27207875		ATATCAATGGCTCTGGAATTTGGGATTCTTTTTGCCCATTTAAAACATACTGGCTCTTGG
ASHG19A3H0000211	34.8663	21.7481	21.8604	18.9658	21.6585	18.4009	27.7205	5.2819	4.70886	4.68652	4.0217	4.31234	4.0303	4.53215	A	P	P	P	P	P	P	noncoding	nc-HOXD1-46-	nc-HOXD1-46	HOX cluster	2057	chr2	+	177037828	177039885		GGAACTGTATCTGTGTTAATCATGCACACTTGCAAGCAGATCACTATGCCTTTATCTCGC
CUST_104_PI426075208	90.444	84.3505	91.143	116.955	92.1252	91.2774	91.6242	6.61459	6.5136	6.65675	6.75872	6.47733	6.4341	6.33816	P	P	P	P	P	P	P	noncoding	nc-HOXC10-125+	nc-HOXC10-125	HOX cluster	128	chr12	-	54376743	54376871		CTGGTGGGTCCTTTTCCCCACGGCCAAGTGGCCCTTGGCCACCTCAGCCTTTTCTTTTTT
ASHG19A3H0000074	112.723	132.265	141.645	291.606	257.752	266.386	295.808	6.91842	7.13335	7.26468	8.14991	8.04408	8.05208	8.1263	P	P	P	P	P	P	P	noncoding	nc-HOXB9-203-	nc-HOXB9-203	HOX cluster	118	chr17	-	46799885	46800003		TCCAGCTTTCGCCCCTACTTGCAGCTATGAGGTGGGGAGCCACCAACCGCAGGCCTTCTT
ASHG19A3H0000161	651.051	618.841	734.613	1161.91	1052.98	1069.98	1250.18	9.28551	9.21438	9.49129	10.2676	10.1559	10.1615	10.3291	P	P	P	P	P	P	P	noncoding	nc-HOXC9-140-	nc-HOXC9-140	HOX cluster	938	chr12	+	54391845	54392783		ACAGACTGGGACTCTTCCTTTCTGACCCTGAAATTGCACCCCTCCTTTAAATTCACTCTA
CUST_84_PI426075208	27.6809	26.4702	25.8189	44.1675	43.6128	40.6361	63.3967	4.95517	4.96323	4.91911	5.30702	5.36003	5.23009	5.79134	P	P	P	P	P	P	P	noncoding	nc-HOXA5-67+	nc-HOXA5-67	HOX cluster	226	chr7	+	27183289	27183515		TTGTTGTCCAGTCGTAAATCCTGCCTGATGACCTCTAGAGGTAAACTCGTGCACTAATAG
CUST_163_PI426075208	42.2858	47.6117	34.3987	80.5341	36.88	58.4395	38.4217	5.5464	5.74647	5.30987	6.21588	5.10873	5.77376	5.03678	P	P	P	P	P	P	P	noncoding	nc-HOXC9-142+	nc-HOXC9-142	HOX cluster	400	chr12	-	54393475	54393875		AGGATTTTTTAATGGGGTGAAAATGCCAGTCCCCGAAGCCAGGGTTCTCGGACCCCCAGG
ASHG19A3H0000204	14.5418	25.6072	19.4741	18.0596	21.592	17.6424	24.4608	4.0399	4.91664	4.53251	3.94428	4.30738	3.96322	4.34811	P	A	P	P	P	P	P	noncoding	nc-HOXD9-18-	nc-HOXD9-18	HOX cluster	178	chr2	+	176986908	176987086		TACAGAGGTCTTCCACCTGTTTTAAACAACACGACAAGCTGTGAGCAAGCGTGTGTGTGG
ASHG19A3H0000093	2346.83	2316.57	2674.5	1392.97	1134.79	1283.92	1336.82	11.0506	11.0375	11.2944	10.5404	10.2681	10.4329	10.4246	P	P	P	P	P	P	P	noncoding	nc-HOXB9-192-	nc-HOXB9-192	HOX cluster	318	chr17	-	46767765	46768083		CCACGTCTACTGCGAGAATGAAGACCATTCTCAGCAATCAGACTGTTGACATTCCAGAAA
ASHG19A3H0000142	21.4038	10.8297	8.32148	13.9424	25.2963	44.1948	38.8032	4.58218	3.86089	3.36855	3.52647	4.54025	5.3592	5.0506	A	P	A	P	P	P	A	noncoding	nc-HOXC6-248-	nc-HOXC6-248	HOX cluster	948	chr12	+	54418111	54419059		GAGGAGACAGGGAGAACACAACTAAGGAGGACCTCTGGAAAATATTGTCCCCAAATAAAA
ASHG19A3H0000142	21.4038	10.8297	8.32148	13.9424	25.2963	44.1948	38.8032	4.58218	3.86089	3.36855	3.52647	4.54025	5.3592	5.0506	A	P	A	P	P	P	A	noncoding	nc-HOXC6-248-	nc-HOXC6-248	HOX cluster	948	chr12	+	54418111	54419059		GAGGAGACAGGGAGAACACAACTAAGGAGGACCTCTGGAAAATATTGTCCCCAAATAAAA
ASHG19A3A016637	932.131	810.511	724.428	281.515	270.66	286.421	272.667	9.76426	9.57744	9.47121	8.097	8.11571	8.16458	8.00072	P	P	P	P	P	P	P	noncoding	ENST00000426615	AC009336.24	Ensembl	658	chr2	+	177042908	177043737		GAAGTAGGCTAAGACTGCTGTTGAACTTGAAGCTAAACTTGAATGCCATTTAAAATAACA
ASHG19A3H0000101	33.267	28.1659	34.0229	27.3858	42.9288	138.628	58.2565	5.2139	5.0445	5.29451	4.58843	5.33476	7.05963	5.66428	P	P	P	P	P	P	P	noncoding	nc-HOXC10-122-	nc-HOXC10-122	HOX cluster	108	chr12	+	54374593	54374701		ACCACAGCCCCGACTCTAGCTAGAAACCTGACTTACTGGGGGCAACTTAGAAGCAAACCA
ASHG19A3H0000207	82.5267	64.5929	78.5402	38.2378	47.9388	50.5889	50.0735	6.49465	6.15151	6.45262	5.08812	5.50391	5.56029	5.43652	P	P	P	P	P	P	P	noncoding	nc-HOXC9-133-	nc-HOXC9-133	HOX cluster	108	chr12	+	54387975	54388083		GAAGAAGACGGCGGCAGCGGGGACTGGGGGCTTCGGGTGGGAACGCCAGGGCTCAGGGCT
ASHG19A3H0000159	18.4192	13.3361	19.3065	11.7425	24.3014	15.5006	21.4441	4.36706	4.1076	4.52146	3.25916	4.4797	3.75319	4.13844	A	A	P	P	P	P	A	noncoding	nc-HOXC9-137-	nc-HOXC9-137	HOX cluster	558	chr12	+	54389985	54390543		GAATTTAAATCACTAAAAGGAAGGCGCGGGGCAGGGGGAGGGGACGACTCTAACCTGTCT
CUST_60_PI426075208	371.851	403.422	365.718	356.951	382.11	363.778	246.29	8.53966	8.64358	8.5598	8.46442	8.61918	8.51442	7.84532	P	P	P	P	P	P	P	noncoding	nc-HOXB8-183+	nc-HOXB8-183	HOX cluster	158	chr17	+	46696749	46696907		CGGGGCCCACCCATTCCCCCGCCAGGCCGGGAGCCCCGGCCCAGCTGCGGCTCTCTCAGC
CUST_169_PI426075208	13.2506	5.01649	9.21055	16.85	15.2667	18.0551	26.0449	3.9056	2.32261	3.50883	3.83558	3.7727	4.00022	4.43924	A	A	A	P	P	P	P	noncoding	nc-HOXD10-7+	nc-HOXD10-7	HOX cluster	388	chr2	-	176974318	176974706		CCTCAAAGAGGAGAATTCATACAGTGTATTGAAGCTGTAACCTCCATTTTACTAGAAACC
ASHG19A3H0000035	112.433	169.515	115.377	332.834	349.584	292.112	138.545	6.91457	7.46627	6.98149	8.35701	8.48617	8.19657	6.97016	P	P	P	P	P	P	P	noncoding	nc-HOXA7-75-	nc-HOXA7-75	HOX cluster	108	chr7	-	27200477	27200585		TGGGAAACAAGGAATCGGCGGGGGCTTGCCCGACCCTCACCGCTCGCGCCTCCCTGACCC
ASHG19A3H0000095	27.3827	29.4247	31.1265	48.8338	49.9853	48.0065	46.3843	4.94029	5.10099	5.17665	5.45701	5.56563	5.48364	5.32126	P	P	P	P	P	P	P	noncoding	nc-HOXB9-199-	nc-HOXB9-199	HOX cluster	188	chr17	-	46791012	46791200		CTTTAGCAATCACTGCCTTCTCACAGAGGTGGAAGTCCAGGTAGTCCTGCAAGCAGTTCC
ASHG19A3A034091	81.53	81.7222	77.6989	32.372	25.8451	26.6109	45.227	6.47707	6.47224	6.43819	4.83799	4.57209	4.59788	5.28431	P	P	P	P	P	P	P	noncoding	NR_002795	HOXA11AS	RefSeq_NR	1628	chr7	+	27225026	27228912		ATTTGCACGGTGACTTGATTACACTCTCTCATTCATGGTCACTTCCGAAGCGCTTTAGTG
ASHG19A3H0000135	27.491	29.2503	23.9662	72.7826	54.1152	67.7782	73.2802	4.94557	5.09404	4.80874	6.05602	5.68644	5.99932	6.00619	P	P	P	P	P	P	P	noncoding	nc-HOXC6-241-	nc-HOXC6-241	HOX cluster	208	chr12	+	54413201	54413409		CGAAAAAGGGAGCCTTTCTCCTGGAGTAATGTGGGAATCGCCGACCGGTGAGGCCTCTAT
ASHG19A3H0000135	27.491	29.2503	23.9662	72.7826	54.1152	67.7782	73.2802	4.94557	5.09404	4.80874	6.05602	5.68644	5.99932	6.00619	P	P	P	P	P	P	P	noncoding	nc-HOXC6-241-	nc-HOXC6-241	HOX cluster	208	chr12	+	54413201	54413409		CGAAAAAGGGAGCCTTTCTCCTGGAGTAATGTGGGAATCGCCGACCGGTGAGGCCTCTAT
ASHG19A3H0000124	28.5033	25.2702	36.3767	29.875	32.4947	31.115	43.4949	4.99697	4.90086	5.39218	4.71724	4.91967	4.83147	5.22732	P	P	P	P	P	P	P	noncoding	nc-HOXC4-153-	nc-HOXC4-153	HOX cluster	519	chr12	+	54408220	54408739		CATACTCCGAGGGATGGCTGAGGTCCCGTTTCGTTTTTAAACGTGGAATTATGATTGCTA
CUST_137_PI426075208	351.949	257.902	396.328	182.972	839.06	862.543	903.26	8.46484	8.0307	8.6671	7.44511	9.81514	9.82199	9.83078	P	P	P	P	P	P	P	noncoding	nc-HOXC6-243+	nc-HOXC6-243	HOX cluster	958	chr12	-	54414121	54415079		ATATAATAAATATATAACACTCCCAAGCCTGGTTTCAGAACACAGCCAACCCAACAAGGT
CUST_137_PI426075208	351.949	257.902	396.328	182.972	839.06	862.543	903.26	8.46484	8.0307	8.6671	7.44511	9.81514	9.82199	9.83078	P	P	P	P	P	P	P	noncoding	nc-HOXC6-243+	nc-HOXC6-243	HOX cluster	958	chr12	-	54414121	54415079		ATATAATAAATATATAACACTCCCAAGCCTGGTTTCAGAACACAGCCAACCCAACAAGGT
CUST_85_PI426075208	23.8147	18.9298	23.5537	56.4583	38.3402	47.1875	57.5105	4.74348	4.53813	4.78504	5.67149	5.16791	5.45957	5.64644	A	P	P	P	P	P	P	noncoding	nc-HOXA5-68+	nc-HOXA5-68	HOX cluster	648	chr7	+	27183537	27184185		TAGTTTGCGATTTGATTTGCTTACGTATCCAGCCTGGAAAATCTTCATCACAGGGTCCGG
CUST_153_PI426075208	27.2237	14.4037	18.372	14.836	34.6661	45.7662	48.8751	4.93416	4.20152	4.44755	3.63324	5.01688	5.41294	5.39856	A	P	P	P	P	P	P	noncoding	nc-HOXC8-148+	nc-HOXC8-148	HOX cluster	288	chr12	-	54401335	54401623		TGCTACTTTTCACCCTGAGACACATCAAGTCCATGCTCAGTGTAAACTAGCACACACATG
CUST_27_PI426075208	239.003	237.226	255.593	384.713	333.552	428.535	360.256	7.93744	7.92137	8.05606	8.57214	8.42044	8.76678	8.41398	P	P	P	P	P	P	P	noncoding	nc-HOXA4-65+	nc-HOXA4-65	HOX cluster	178	chr7	+	27179247	27179425		TGCGGCCCTGCCAGGTCCCCACACACAGGCCCATTCGCACACAAAAATCATCTTTTTGCA
CUST_22_PI426075208	124.709	153.658	128.665	224.245	247.385	212.844	230.086	7.05625	7.3356	7.13257	7.74804	7.97683	7.70949	7.73592	P	P	P	P	P	P	P	noncoding	nc-HOXA2-60+	nc-HOXA2-60	HOX cluster	148	chr7	+	27142497	27142645		TCCCGGAGTACGTGGGGGCGAGGGTGCCTGCGTGCCTCCTGATCTGCAAGGATCTATCTA
ASHG19A3H0000104	112.061	112.889	105.323	64.7883	66.2955	61.8202	69.0781	6.90876	6.91612	6.85972	5.88117	5.99259	5.85671	5.92114	P	P	P	P	P	P	P	noncoding	nc-HOXC10-125-	nc-HOXC10-125	HOX cluster	128	chr12	+	54376743	54376871		AAAAAAGAAAAGGCTGAGGTGGCCAAGGGCCACTTGGCCGTGGGGAAAAGGACCCACCAG
CUST_182_PI426075208	2089.72	2013.12	2102.19	4501	4012.74	4117.29	3777.44	10.8881	10.84	10.947	12.2557	12.1249	12.1261	11.9339	P	P	P	P	P	P	P	noncoding	nc-HOXD3-41+	nc-HOXD3-41	HOX cluster	128	chr2	-	177025459	177025587		GAGCGGCAGCCACCCGCGCCCCCACCCACTCCTGGGTTTCTGCCCAGCCCTCCCAGGCCC
CUST_95_PI426075208	6736.27	6774.72	6750.45	617.89	1618.77	1770.45	1749.33	12.5351	12.5617	12.59	9.3036	10.7897	10.8906	10.8088	P	P	P	P	P	P	P	noncoding	nc-HOXB9-199+	nc-HOXB9-199	HOX cluster	188	chr17	+	46791012	46791200		GGAACTGCTTGCAGGACTACCTGGACTTCCACCTCTGTGAGAAGGCAGTGATTGCTAAAG
ASHG19A3H0000082	21.8594	13.8472	18.6594	10.1278	34.3211	27.7081	33.775	4.61284	4.1549	4.46972	3.04542	4.99941	4.65855	4.83924	A	P	P	P	P	P	A	noncoding	nc-HOXA1-54-	nc-HOXA1-54	HOX cluster	128	chr7	-	27136437	27136565		GGGCTCCCGGTGCAAAACTGAGTGGGAAAGAGAAAGGGGCGGAGAGCGACGAGAGAGGGA
ASHG19A3H0000046	31.0759	31.8992	26.1391	50.8746	49.1874	45.7953	58.8142	5.11416	5.20982	4.93775	5.52485	5.53986	5.41433	5.67939	P	P	P	P	P	P	P	noncoding	nc-HOXB4-166-	nc-HOXB4-166	HOX cluster	263	chr17	-	46655745	46656008		GAAGAAGGGGAAATAAACCTCTTTGGCTGGAGTGGGGTCCGGGTGAGCAGATTTCCTTAT
CUST_86_PI426075208	209.356	215.861	219.51	164.325	294.463	330.856	342.022	7.76011	7.79552	7.85111	7.27796	8.23296	8.37401	8.33693	P	P	P	P	P	P	P	noncoding	nc-HOXA9-77+	nc-HOXA9-77	HOX cluster	678	chr7	+	27206497	27207175		ATTTTCATTTAAAAAATTAACCCTGGAGGAAACCCTGGCTCCCAATTTTAAGTGTCTGCA
CUST_105_PI426075208	32.1192	25.8911	29.897	43.4655	35.7129	37.5662	21.7215	5.16194	4.93274	5.12232	5.28062	5.06118	5.11537	4.16053	A	P	P	P	P	P	P	noncoding	nc-HOXC10-126+	nc-HOXC10-126	HOX cluster	228	chr12	-	54377223	54377451		ATTTGAAATGGTTTTGTGTTTTCATATGCAGGGTCACCGTGGCCTCAGCATGGGGGTTAT
ASHG19A3A007736	30.054	30.7331	24.3996	64.504	42.0956	52.3037	54.7513	5.07176	5.15853	4.8357	5.87495	5.30775	5.60934	5.57173	P	P	P	P	P	P	P	noncoding	NR_033203	LOC404266	RefSeq_NR	452	chr17	+	46669653	46679703		TCTCGATGCGCCGTCGCCGGGTCAGGTTGCTTGTCTGGAGATGGAGCCACTACAGGCGGG
ASHG19A3A007736	30.054	30.7331	24.3996	64.504	42.0956	52.3037	54.7513	5.07176	5.15853	4.8357	5.87495	5.30775	5.60934	5.57173	P	P	P	P	P	P	P	noncoding	NR_033203	LOC404266	RefSeq_NR	452	chr17	+	46669653	46679703		TCTCGATGCGCCGTCGCCGGGTCAGGTTGCTTGTCTGGAGATGGAGCCACTACAGGCGGG
ASHG19A3A016633	36.4536	39.5934	35.0985	34.554	29.4411	31.667	32.7009	5.3411	5.49583	5.33817	4.93641	4.77266	4.85942	4.79246	P	P	P	P	P	P	P	noncoding	uc002ukr.2	BC047605	UCSC_knowngene	1782	chr2	+	177001339	177005118		CTTCTTTCCAGTTTATATATATATATAGCATATATTTGCCCCTCGGGGAAGGCTGTAGAT
ASHG19A3H0000055	654.654	769.433	680.854	506.124	658.069	708.88	831.756	9.29119	9.50548	9.39185	9.0092	9.45863	9.54147	9.69737	P	P	P	P	P	P	P	noncoding	nc-HOXB4-177-	nc-HOXB4-177	HOX cluster	108	chr17	-	46668510	46668618		TCTCCCATCCCGGGCACACCCTGCACCATTCTCAATAGATCTGGGGTGCAGGGAAGAAAA
ASHG19A3H0000008	235.128	202.561	267.359	776.212	654.151	664.112	813.927	7.91751	7.71094	8.1183	9.65506	9.44978	9.4355	9.66345	P	P	P	P	P	P	P	noncoding	nc-HOXA11-90-	nc-HOXA11-90	HOX cluster	168	chr7	-	27231227	27231395		CTTTGGTGAGACCCTTGATGCTCTTCTCCTGCCTAAAATCCACACAGATGTGAGGCGCAC
ASHG19A3H0000039	7383.64	7070.04	6014.06	5174.77	5046.13	4986.41	3641.15	12.6592	12.6136	12.4349	12.4667	12.4492	12.3987	11.8836	P	P	P	P	P	P	P	noncoding	nc-HOXA9-81-	nc-HOXA9-81	HOX cluster	198	chr7	-	27209607	27209805		CGGTTAGGTGGACCCGGGCTGGACTGCATGGGGGCCTCCCCCTCCCCCAGTACGGCCTCC
ASHG19A3H0000115	18.8558	20.2506	24	38.7841	27.3619	28.5029	34.1762	4.40328	4.62201	4.81234	5.11151	4.66064	4.70052	4.85793	A	P	P	P	P	P	P	noncoding	nc-HOXC11-113-	nc-HOXC11-113	HOX cluster	158	chr12	+	54362524	54362682		TGTTTTTGTTTTTGGTGACTGGAATCTTTTTGCTTTGTGTCACCTGAAGTTTTTCACCCC
ASHG19A3H0000123	186.134	149.694	193.795	140.222	225.043	332.405	366.358	7.60364	7.29874	7.69083	7.03268	7.82589	8.3809	8.44221	P	P	P	P	P	P	P	noncoding	nc-HOXC4-152-	nc-HOXC4-152	HOX cluster	229	chr12	+	54407760	54407989		CACCCCTCATCTGTCTAGCTCCTGGTCAATGATTTTCCCAGACCTAGGCCCAGGCCAACT
ASHG19A3H0000185	499.431	521.259	469.384	920.512	806.941	752.112	460.787	8.92386	8.97893	8.88045	9.91978	9.75765	9.62386	8.79238	P	P	P	P	P	P	P	noncoding	nc-HOXD3-44-	nc-HOXD3-44	HOX cluster	98	chr2	+	177027699	177027797		TCGGGCCTCCACCGCACCACCCTCAGGTCCCGGCCCAGCCAAGAGCGCTTGGGGGAGGGG
ASHG19A3H0000156	2653.59	2662.87	2709.97	2670.09	2608.13	2606.01	2643.03	11.2152	11.23	11.3125	11.4829	11.4872	11.4605	11.4138	P	P	P	P	P	P	P	noncoding	nc-HOXC9-130-	nc-HOXC9-130	HOX cluster	151	chr12	+	54384062	54384213		AAATGGATGGTTTTTTGTTTTTAGTGATTTTTAGCAACACCCCTCCCCCGAAGAGGCTGA
CUST_45_PI426075208	98.191	97.2256	98.8849	124.19	136.062	139.648	136.096	6.73402	6.71577	6.76852	6.85579	7.06509	7.0704	6.94229	P	P	P	P	P	P	P	noncoding	nc-HOXB3-165+	nc-HOXB3-165	HOX cluster	346	chr17	+	46651812	46652158		GAAAAAACGACTTTTAATTGCATATGCTCTCCCGAGCCCCGAGCTTTTTGGAGATGTGGT
ASHG19A3H0000138	125.001	91.5948	109.385	137.236	208.756	188.768	223.285	7.05992	6.63361	6.91244	7.00046	7.70986	7.52827	7.68929	P	P	P	P	P	P	P	noncoding	nc-HOXC6-244-	nc-HOXC6-244	HOX cluster	1488	chr12	+	54415121	54416609		TCCCAGCCTTTTTCCCTTCCAGAGACACAAAAAGACAGAGCAGAGGGGAAATATCAATGT
ASHG19A3H0000138	125.001	91.5948	109.385	137.236	208.756	188.768	223.285	7.05992	6.63361	6.91244	7.00046	7.70986	7.52827	7.68929	P	P	P	P	P	P	P	noncoding	nc-HOXC6-244-	nc-HOXC6-244	HOX cluster	1488	chr12	+	54415121	54416609		TCCCAGCCTTTTTCCCTTCCAGAGACACAAAAAGACAGAGCAGAGGGGAAATATCAATGT
ASHG19A3H0000031	203.765	213.391	191.094	429.341	507.305	546.359	533.895	7.72651	7.78101	7.67088	8.74173	9.06824	9.13974	9.02342	P	P	P	P	P	P	P	noncoding	nc-HOXA6-71-	nc-HOXA6-71	HOX cluster	218	chr7	-	27192547	27192765		GCATGCGCCCTGAACCCAGCCCCAGGCTAGGAAATGGGATTTAAGGTCCCCACCCCGCCT
CUST_125_PI426075208	134.286	134.045	114.626	199.385	195.929	168.299	230.549	7.1559	7.1505	6.97249	7.56833	7.61397	7.35334	7.73982	P	P	P	P	P	P	P	noncoding	nc-HOXC4-263+	nc-HOXC4-263	HOX cluster	152	chr12	-	54429147	54429299		GTTTGTGGGTCTCCTTCTACATCTCACAGCCCATTTAGACAATTTTACCCAATACATGCC
CUST_69_PI426075208	256.027	258.502	283.549	684.92	630.768	642.516	746.279	8.02764	8.0344	8.20488	9.45935	9.39185	9.38241	9.53235	P	P	P	P	P	P	P	noncoding	nc-HOXB9-196+	nc-HOXB9-196	HOX cluster	208	chr17	+	46782504	46782712		AGAGACAGAAATCAAATCTAGGGTGTTCATCTAGAGTCTCCTGCTCCTCCATTCCTGCTT
ASHG19A3H0000154	543.628	640.749	453.738	652.216	669.771	645.24	308.217	9.03581	9.25374	8.84045	9.38766	9.48618	9.39048	8.18585	P	P	P	P	P	P	P	noncoding	nc-HOXC8-149-	nc-HOXC8-149	HOX cluster	228	chr12	+	54401765	54401993		TGCTCCAGTCCCCTCCAACTCAGATGCAAATAGTCTCCTAAGAAGAAATGTCCTGAATCA
CUST_189_PI426075208	167.995	172.898	188.99	195.101	159.203	152.53	144.821	7.4625	7.49502	7.65644	7.53744	7.30579	7.20621	7.03777	P	P	P	P	P	P	P	noncoding	nc-HOXD4-25+	nc-HOXD4-25	HOX cluster	228	chr2	-	177001718	177001946		AAGTGATTGGGGGAAGGGGCTTAGACAGCGACCCCCCACTTCCCCGGGAAATGTAGGGGA
CUST_78_PI426075208	77.7159	86.4923	113.119	25.5084	30.0134	29.7991	41.4268	6.41334	6.5482	6.95482	4.47717	4.80042	4.76896	5.15419	P	P	P	P	P	P	P	noncoding	nc-HOXA11-84+	nc-HOXA11-84	HOX cluster	708	chr7	+	27225087	27225795		ATTTGCACGGTGACTTGATTACACTCTCTCATTCATGGTCACTTCCGAAGCGCTTTAGTG
ASHG19A3H0000186	21.8186	15.7431	22.2433	31.7067	30.7828	30.8335	42.1447	4.60981	4.30612	4.70984	4.81095	4.83964	4.81954	5.17921	A	P	P	P	P	P	P	noncoding	nc-HOXD3-45-	nc-HOXD3-45	HOX cluster	618	chr2	+	177028029	177028647		AGGGCCAAGAGTGTGGTGGATACTTACCGGAATGAATAAACTCAGGGAAAGCATCTGATA
CUST_109_PI426075208	10.893	14.6992	68.6027	18.5903	17.3546	18.529	23.2222	3.63707	4.22685	6.26408	3.99017	3.97363	4.0425	4.26342	A	A	P	P	P	P	P	noncoding	nc-HOXC11-107+	nc-HOXC11-107	HOX cluster	148	chr12	-	54352146	54352294		GTCAGGTGTCAGATACCCAGCGGGGGATGGAGGCATGTGATTTTATCTCCATTCTGCTGG
ASHG19A3H0000013	60.3478	65.9882	50.3292	78.1521	60.4426	73.7676	84.0781	6.04242	6.18122	5.83713	6.16906	5.85578	6.12521	6.21621	P	P	P	P	P	P	P	noncoding	nc-HOXA13-101-	nc-HOXA13-101	HOX cluster	138	chr7	-	27256845	27256983		CCTGGATCTCTTTTGCCTAGCATTTATCTTATACAGACCCATATATACACCTACCCACCC
ASHG19A3A047646	215.739	208.029	147.73	339.91	312.535	293.606	377.767	7.79935	7.74956	7.32204	8.38835	8.31984	8.20398	8.4897	P	P	P	P	P	P	P	noncoding	ENST00000513533	AC012531.16	Ensembl	504	chr12	-	54388991	54390569		GGGACGCCTTAACCAGCCCCTCTCAGTTGCAGATAACCCAATGAATGAAAGTGCAAATTC
ASHG19A3H0000197	11.3378	5.85493	8.28931	36.5839	35.8626	31.5427	26.5043	3.68892	3.06553	3.36349	5.01958	5.06689	4.85157	4.46525	A	A	A	P	P	P	P	noncoding	nc-HOXD4-34-	nc-HOXD4-34	HOX cluster	158	chr2	+	177012419	177012577		GTACTGATCGCGGGGAAGTGGTGGGCTAAGGGGCCAAGCCAGCGGAGTGGGCGGATAGAA
ASHG19A3H0000020	42.5211	42.3441	41.2332	52.9567	51.2576	71.0106	56.2848	5.55518	5.58918	5.56358	5.58102	5.60003	6.07242	5.61345	P	P	P	P	P	P	P	noncoding	nc-HOXA1-58-	nc-HOXA1-58	HOX cluster	148	chr7	-	27138197	27138345		ACCTACTTGCCTAGAGGGCCAAGGATCTCCTACTCGGTGGAACGGCCCCCAGAATTTCTT
ASHG19A3H0000085	96.6467	93.7497	86.4995	37.4035	27.728	19.9638	35.7736	6.71191	6.66623	6.59226	5.05337	4.6813	4.15654	4.93216	P	P	P	P	P	P	P	noncoding	nc-HOXA5-68-	nc-HOXA5-68	HOX cluster	648	chr7	-	27183537	27184185		CCGGACCCTGTGATGAAGATTTTCCAGGCTGGATACGTAAGCAAATCAAATCGCAAACTA
CUST_132_PI426075208	447.058	523.327	475.921	659.815	667.364	583.847	649.254	8.79101	8.98245	8.90022	9.40377	9.48221	9.24151	9.31992	P	P	P	P	P	P	P	noncoding	nc-HOXC6-238+	nc-HOXC6-238	HOX cluster	238	chr12	-	54411811	54412049		GGTAGGCCTCTTTTCTCTGAGCACAAGATGGCTTTTGAGTACAGCATCCCCCACCCCCAC
CUST_132_PI426075208	447.058	523.327	475.921	659.815	667.364	583.847	649.254	8.79101	8.98245	8.90022	9.40377	9.48221	9.24151	9.31992	P	P	P	P	P	P	P	noncoding	nc-HOXC6-238+	nc-HOXC6-238	HOX cluster	238	chr12	-	54411811	54412049		GGTAGGCCTCTTTTCTCTGAGCACAAGATGGCTTTTGAGTACAGCATCCCCCACCCCCAC
ASHG19A3H0000178	88.9192	95.0198	85.6133	170.807	167.301	172.007	194.075	6.59279	6.68477	6.57929	7.33735	7.38	7.38746	7.48133	P	P	P	P	P	P	P	noncoding	nc-HOXD1-49-	nc-HOXD1-49	HOX cluster	108	chr2	+	177048382	177048490		CCACCCCAACTCCTACAGCAGAATTATTCAAAGTGTGGTCCCAAACAATCTTGCTTTAGG
CUST_97_PI426075208	114.129	109.757	120.626	241.642	231.958	228.541	238.457	6.93573	6.87851	7.04474	7.86779	7.87271	7.81662	7.79536	P	P	P	P	P	P	P	noncoding	nc-HOXC10-118+	nc-HOXC10-118	HOX cluster	118	chr12	-	54371444	54371562		AGAAGTGTCACACACACATACACACACAAAAATGTACAGAGGCCCCTCAGTTGCATTCCT
ASHG19A3H0000062	16.1427	12.1869	21.0111	15.5643	19.1518	32.7121	31.9065	4.17577	4.00317	4.63471	3.71204	4.13073	4.90694	4.75369	A	A	P	P	P	P	P	noncoding	nc-HOXB9-185-	nc-HOXB9-185	HOX cluster	148	chr17	-	46708159	46708307		GAGGTTTGGCAGAAGATTTCATTACTTCACAATTAAGATCCCCACTTGGGGGGTGTGGAA
ASHG19A3H0000057	1928.7	1608.44	2329.65	3160.89	2845.91	3176.22	3200.54	10.7656	10.5106	11.0998	11.7351	11.6207	11.7488	11.6978	P	P	P	P	P	P	P	noncoding	nc-HOXB5-179-	nc-HOXB5-179	HOX cluster	101	chr17	-	46673010	46673111		TCTCTCCTCAACCCCCAGCCTCTCCATCTTTCCTGAGCCAGAATTCTTCAGCAAAGGCGA
ASHG19A3H0000023	166.447	151.537	156.644	39.1685	38.3782	47.7678	39.6532	7.45069	7.31553	7.3975	5.12498	5.16973	5.47538	5.08365	P	P	P	P	P	P	P	noncoding	nc-HOXA4-61-	nc-HOXA4-61	HOX cluster	158	chr7	-	27170427	27170585		GGGGCGCTGCACGTGGGGCACGGGGCGGGGCGCGCGCTGGGCTGGGGAGGAGCGGCTCGA
CUST_152_PI426075208	49.9642	44.5961	46.5448	106.823	79.9728	96.2848	104.168	5.78127	5.65535	5.73201	6.62968	6.26854	6.51395	6.53249	P	P	P	P	P	P	P	noncoding	nc-HOXC8-147+	nc-HOXC8-147	HOX cluster	208	chr12	-	54400415	54400623		AACCCTGCCAGAGAGCTATTCTTCCGGGGCTTTGTGTCTTGGAATGCGACTGTCCCGAGT
ASHG19A3A048667	27.7609	49.5331	30.0606	107.878	84.9875	67.4098	29.0079	4.95925	5.79467	5.13005	6.64571	6.35883	5.99109	4.60822	P	P	P	P	P	P	P	noncoding	NR_026655	FLJ12825	RefSeq_NR	3942	chr12	+	54452037	54516018		AAGTAAAAAGAAGACGGGTGAAATGTCGACACCAATCTTCCAGGGTTCCTTCTCTCCAAG
CUST_204_PI426075208	29.9259	20.2748	21.7391	69.4564	74.0806	74.8271	79.9844	5.06633	4.62359	4.67823	5.98799	6.15548	6.14372	6.14295	A	P	P	P	P	P	P	noncoding	nc-HOXD9-18+	nc-HOXD9-18	HOX cluster	178	chr2	-	176986908	176987086		CCACACACACGCTTGCTCACAGCTTGTCGTGTTGTTTAAAACAGGTGGAAGACCTCTGTA
CUST_46_PI426075208	398.734	396.16	418.371	631.812	574.627	595.83	639.217	8.63154	8.62128	8.73623	9.33656	9.24675	9.2719	9.30077	P	P	P	P	P	P	P	noncoding	nc-HOXB4-166+	nc-HOXB4-166	HOX cluster	263	chr17	+	46655745	46656008		ATAAGGAAATCTGCTCACCCGGACCCCACTCCAGCCAAAGAGGTTTATTTCCCCTTCTTC
ASHG19A3H0000172	43.4256	44.0789	46.7058	12.4925	47.764	16.5562	15.0121	5.58577	5.63775	5.7358	3.35223	5.49821	3.86611	3.56396	P	P	P	A	P	P	A	noncoding	nc-HOXD11-4-	nc-HOXD11-4	HOX cluster	488	chr2	+	176968082	176968570		AGGAAAGCATATGAACTCAGATCCAGGCCTTAAGACAGAAAACACGGAGGCCGTTTCTTT
CUST_63_PI426075208	1238.8	1084.01	995.531	532.905	431.68	398.081	396.173	10.1396	9.96364	9.90922	9.08626	8.80529	8.65381	8.56064	P	P	P	P	P	P	P	noncoding	nc-HOXB9-186+	nc-HOXB9-186	HOX cluster	168	chr17	+	46715352	46715520		TAAAGTCGGGTCTGTATGTGTCAGCATTCCTGTGTGTGAGTGTGTGTGTGAATATGTGCA
ASHG19A3H0000029	8.22581	13.1656	17.0995	20.2948	26.4424	26.9559	27.9243	3.24709	4.09256	4.34982	4.1247	4.60772	4.61857	4.54589	A	A	A	P	P	P	P	noncoding	nc-HOXA6-69-	nc-HOXA6-69	HOX cluster	128	chr7	-	27190967	27191095		AGCTAAGGTTGAAGGAAGGACGCAAACCGAGTCTGGGCGATAGGGGGACCCCCCAATCCA
ASHG19A3H0000058	78.3846	111.111	70.582	139.822	144.45	103.748	102.778	6.42608	6.89614	6.30203	7.02738	7.15608	6.62598	6.51048	P	P	P	P	P	P	P	noncoding	nc-HOXB6-180-	nc-HOXB6-180	HOX cluster	108	chr17	-	46682870	46682978		CATCCAGGCCACTTTTCCTCCTGGGGCAAAAACTAAGCCCTAGGGAATCTAAGGCCCCCA
ASHG19A3H0000027	65.3271	81.9099	51.5861	127.848	104.236	116.944	133.462	6.15955	6.47644	5.87172	6.89714	6.66349	6.80612	6.91067	P	P	P	P	P	P	P	noncoding	nc-HOXA4-65-	nc-HOXA4-65	HOX cluster	178	chr7	-	27179247	27179425		TGCAAAAAGATGATTTTTGTGTGCGAATGGGCCTGTGTGTGGGGACCTGGCAGGGCCGCA
CUST_194_PI426075208	40.2804	72.834	60.2183	89.1026	82.7136	72.3605	72.5523	5.47595	6.31664	6.08454	6.36895	6.32142	6.09975	5.99053	P	P	P	P	P	P	P	noncoding	nc-HOXD4-31+	nc-HOXD4-31	HOX cluster	108	chr2	-	177010079	177010187		AACTTTGGGGGCTCAAAACTGGGTGGGAGTTTTAGGAGCACTACCCCCACACCCACACTG
CUST_114_PI426075208	32.929	16.0041	16.2268	52.5811	35.2489	30.3912	20.9693	5.19847	4.32627	4.28105	5.57226	5.04211	4.79878	4.09819	A	P	A	P	P	P	P	noncoding	nc-HOXC11-112+	nc-HOXC11-112	HOX cluster	1118	chr12	-	54361354	54362472		AACTGTTTAAAATACTATCCACCGAACTCTAGATACTGCCAAAGAGAGCCTGCTGTTCCC
CUST_126_PI426075208	1371.35	891.549	1230.78	1466.49	1293.58	1220.23	1463.09	10.2877	9.70983	10.1953	10.6176	10.4601	10.3554	10.5545	P	P	P	P	P	P	P	noncoding	nc-HOXC4-264+	nc-HOXC4-264	HOX cluster	768	chr12	-	54429771	54430539		GTAAAGTTTTATGGACCCTTCCCACATTTGTTTCTACTGTAAAGTGCTTCCTCCCCCAGC
ASHG19A3H0000129	142.338	130.064	162.042	326.067	288.456	292.783	537.423	7.23629	7.11112	7.44385	8.32078	8.20742	8.2004	9.03365	P	P	P	P	P	P	P	noncoding	nc-HOXC5-255-	nc-HOXC5-255	HOX cluster	468	chr12	+	54425701	54426169		ATAACGGGCCTTTTCCTCTGCCATGCTCACGTAATATTTGTGGAGGCTTCAATCTTGCTT
ASHG19A3A008518	87221.1	77703.2	78387.7	65670.2	70019.8	70456.7	69279	16.1305	16.0314	16.0772	16.2359	16.2797	16.2605	16.1994	P	P	P	P	P	P	P	noncoding	ENST00000461606	CTD-2377D24.1	Ensembl	579	chr17	-	46768477	46769056		GAAAGATGAATTCATCCTTGAAGGAAATGACATTGAGCTTGTTTCAAATTCAGCGGCTTT
ASHG19A3A007734	543.167	547.22	531.304	594.409	493.12	479.363	545.923	9.03426	9.04024	9.046	9.24902	9.02089	8.94129	9.05734	P	P	P	P	P	P	P	noncoding	NR_033201	LOC404266	RefSeq_NR	570	chr17	+	46667822	46683772		GGCCAAGCTGGAAGGGATTGACCGGCCGTTTCCTCTCCCTCGCCGGCCTCGGCGGAGATT
ASHG19A3A007734	543.167	547.22	531.304	594.409	493.12	479.363	545.923	9.03426	9.04024	9.046	9.24902	9.02089	8.94129	9.05734	P	P	P	P	P	P	P	noncoding	NR_033201	LOC404266	RefSeq_NR	570	chr17	+	46667822	46683772		GGCCAAGCTGGAAGGGATTGACCGGCCGTTTCCTCTCCCTCGCCGGCCTCGGCGGAGATT
ASHG19A3A032595	41.6916	37.2896	46.6157	137.424	158.026	145.81	202.547	5.52471	5.41906	5.73373	7.00295	7.2942	7.13758	7.54505	P	P	P	P	P	P	P	noncoding	HIT000098379		H-invDB	227	chr7	-	27235768	27235994		ACCTCCTTGACTTTAGAGATTCAGTACTCAATTATTTGGCTCCAGCTGGAGCAAATTTGA
ASHG19A3H0000114	17.5485	19.6176	15.2398	37.6242	38.7089	38.4135	40.7074	4.29667	4.58297	4.19501	5.0629	5.18259	5.14955	5.12758	A	A	A	P	P	P	P	noncoding	nc-HOXC11-112-	nc-HOXC11-112	HOX cluster	1118	chr12	+	54361354	54362472		GGGAACAGCAGGCTCTCTTTGGCAGTATCTAGAGTTCGGTGGATAGTATTTTAAACAGTT
CUST_203_PI426075208	5269.82	4913.07	5205.62	6682.31	5498.39	5867.38	5403.94	12.1912	12.1085	12.2341	12.8366	12.5944	12.6536	12.4552	P	P	P	P	P	P	P	noncoding	nc-HOXD9-17+	nc-HOXD9-17	HOX cluster	168	chr2	-	176986678	176986846		TAATAAAACGGACGGATGGAGCAGATCGGAGGGCCCCCTCCCCCTGCCACACTCACACAC
ASHG19A3H0000160	9697.57	10293.6	8754.04	9973.96	9164.95	8914.94	10114.9	13.0498	13.1477	12.9656	13.4404	13.3454	13.2597	13.3759	P	P	P	P	P	P	P	noncoding	nc-HOXC9-138-	nc-HOXC9-138	HOX cluster	148	chr12	+	54391355	54391503		TATCTCTTTTCATCTTGCCTTCCTTCTTTTAATTCTCCCCCTTTTTTCCCTTTATTCTAA
ASHG19A3H0000175	32.9507	38.3704	33.732	34.0227	33.5061	37.2301	30.8726	5.19981	5.4566	5.28232	4.91269	4.96235	5.10271	4.70193	P	P	P	P	P	P	P	noncoding	nc-HOXD13-2-	nc-HOXD13-2	HOX cluster	188	chr2	+	176957160	176957348		ATCAACTCGTGGGGGTGGCTGCAGCGCGTACGCCTGGGTCGGGGGGGAGGGCGGGAATGG
ASHG19A3H0000077	1487.58	1296.48	1187.59	16.2645	18.2264	13.2784	18.2545	10.3998	10.2171	10.1489	3.77829	4.04938	3.50159	3.88369	P	M	P	P	M	A	P	noncoding	nc-HOXB9-206-	nc-HOXB9-206	HOX cluster	691	chr17	-	46803175	46803866		GCTGCCATGATCGTTAGCCTCATATTTTCTATCTAGAGCTCTGTAGAGCACTTTAGAAAC
ASHG19A3H0000032	537.777	693.701	330.11	936.398	896.547	866.533	964.293	9.02089	9.36299	8.41504	9.94918	9.92139	9.82688	9.92667	P	P	P	P	P	P	P	noncoding	nc-HOXA6-72-	nc-HOXA6-72	HOX cluster	1151	chr7	-	27193137	27194288		AGACCCGCAAGAAAGTGAATCTCACTACTACCTACTCCCCTAAAACTACCTATTTTGTGC
CUST_165_PI426075208	29.7645	38.2725	26.8683	54.235	44.0852	47.4329	58.4682	5.05791	5.4531	4.97542	5.61539	5.37528	5.46675	5.66967	P	P	P	P	P	P	P	noncoding	nc-HOXD10-11+	nc-HOXD10-11	HOX cluster	118	chr2	-	176977568	176977686		ACACACTTTGTAAGATGGGGGTGGGGAGAGGTCTTCAGCCCCCAGAGGTTCTGGTCTGAT
CUST_83_PI426075208	255.965	273.303	279.088	336.105	283.741	306.85	328.641	8.02728	8.10929	8.18207	8.37311	8.18339	8.26696	8.28017	P	P	P	P	P	P	P	noncoding	nc-HOXA1-55+	nc-HOXA1-55	HOX cluster	328	chr7	+	27136777	27137105		CTCATCACCCTACTTCCCTGAGGCTGCTGAGGTCGTTAAATTGTTGTTTACTATTAGGTT
CUST_118_PI426075208	38.9951	44.556	118.564	54.5639	67.5179	74.0593	90.6974	5.43382	5.65451	7.01949	5.62384	6.02153	6.13126	6.32378	P	P	P	P	P	P	P	noncoding	nc-HOXC11-116+	nc-HOXC11-116	HOX cluster	228	chr12	-	54366534	54366762		TCTAGCTGCTGCTCTTTTTTCCCCCAGGATTGGGGGAAGGAGGAGGGCTCTCATGTATGG
ASHG19A3H0000182	100.012	91.3067	94.4863	66.9559	64.6358	64.3379	61.8882	6.76183	6.62963	6.70776	5.9299	5.95487	5.92173	5.75412	P	P	P	P	P	P	P	noncoding	nc-HOXD3-41-	nc-HOXD3-41	HOX cluster	128	chr2	+	177025459	177025587		GGGCCTGGGAGGGCTGGGCAGAAACCCAGGAGTGGGTGGGGGCGCGGGTGGCTGCCGCTC
ASHG19A3H0000194	102.799	119.691	100.663	94.5751	91.5378	103.033	105.945	6.79817	6.99408	6.7949	6.45526	6.467	6.61659	6.56106	P	P	P	P	P	P	P	noncoding	nc-HOXD4-31-	nc-HOXD4-31	HOX cluster	108	chr2	+	177010079	177010187		CAGTGTGGGTGTGGGGGTAGTGCTCCTAAAACTCCCACCCAGTTTTGAGCCCCCAAAGTT
ASHG19A3H0000152	11.7079	5.80575	8.54994	21.1276	22.9792	27.4865	22.8246	3.73223	3.01044	3.40639	4.18445	4.39793	4.64422	4.23541	A	A	A	P	P	P	P	noncoding	nc-HOXC8-147-	nc-HOXC8-147	HOX cluster	208	chr12	+	54400415	54400623		ACTCGGGACAGTCGCATTCCAAGACACAAAGCCCCGGAAGAATAGCTCTCTGGCAGGGTT
CUST_110_PI426075208	114.346	107.873	110.819	104.958	94.0092	108.782	113.242	6.93824	6.85418	6.93037	6.60513	6.51293	6.69513	6.66164	P	P	P	P	P	P	P	noncoding	nc-HOXC11-108+	nc-HOXC11-108	HOX cluster	2358	chr12	-	54356056	54358414		AAGTTTTACATGTGGTGAATATACGTGCTGTATGTAATCTTTCCCCAGTCGGTTGCTTTC
ASHG19A3H0000157	656.016	649.907	686.723	25028.3	35489.6	36995.1	39524	9.29454	9.27409	9.40077	14.794	15.285	15.3513	15.3741	P	P	P	P	P	P	P	noncoding	nc-HOXC9-131-	nc-HOXC9-131	HOX cluster	198	chr12	+	54384395	54384593		ACTGCTGCTGGGGGTCACCCCAAGAGCCCCCCACCCATCCAAGGAAAGGAATAAACTTAA
ASHG19A3A008508	394.698	361.016	326.304	24.7551	13.9077	16.9436	15.1878	8.61624	8.49464	8.39892	4.43038	3.61676	3.8994	3.58387	P	P	P	A	A	P	P	noncoding	AK000839		misc_RNA	1951	chr17	-	46657698	46659621		ATATCTAGATATTCGTTTGATCACAAACTAAAGGCTTGGAGGGGCACGGAGGAGCCGATT
ASHG19A3A034086	2032.18	2014.88	1911.06	821.988	1114.02	1006.76	1199.28	10.8499	10.8422	10.8162	9.74735	10.2359	10.0661	10.2547	P	P	P	P	P	P	P	noncoding	uc003syg.2	BC031342	UCSC_knowngene	721	chr7	+	27135742	27139584		TCGCGTTGTCATTGGAACTTCCAAGCCTTTGCTGTTAAGAGCCAGGTTCTTAAATCAACC
ASHG19A3A034086	2032.18	2014.88	1911.06	821.988	1114.02	1006.76	1199.28	10.8499	10.8422	10.8162	9.74735	10.2359	10.0661	10.2547	P	P	P	P	P	P	P	noncoding	uc003syg.2	BC031342	UCSC_knowngene	721	chr7	+	27135742	27139584		TCGCGTTGTCATTGGAACTTCCAAGCCTTTGCTGTTAAGAGCCAGGTTCTTAAATCAACC
CUST_18_PI426075208	28.8692	33.6227	26.5422	206.201	20.4271	16.0953	30.4366	5.01538	5.27979	4.95848	7.6177	4.22869	3.81947	4.6795	P	P	P	P	P	P	P	noncoding	nc-HOXA1-56+	nc-HOXA1-56	HOX cluster	318	chr7	+	27137277	27137595		AATAGTATTTGTGACTTTGATCCATCCCAAGCATGGTTAAGAGGGAGCACGGGCAGGAAA
CUST_62_PI426075208	49.0075	123.13	55.832	40.2275	49.2138	53.0187	54.4467	5.75815	7.0362	5.98086	5.16226	5.54061	5.63329	5.56412	P	P	P	P	P	P	P	noncoding	nc-HOXB9-185+	nc-HOXB9-185	HOX cluster	148	chr17	+	46708159	46708307		TTCCACACCCCCCAAGTGGGGATCTTAATTGTGAAGTAATGAAATCTTCTGCCAAACCTC
ASHG19A3H0000187	1201.22	1303.49	1212.11	620.344	530.269	578.531	637.957	10.1013	10.2234	10.1716	9.3092	9.13624	9.22994	9.29594	P	P	P	P	P	P	P	noncoding	nc-HOXD4-22-	nc-HOXD4-22	HOX cluster	706	chr2	+	176996730	176997436		TTCCTTTATAATGAATAGTTCGGGTGCGTTTTGTTTACTCCTAAAAGGTTTCTTTGCGTA
ASHG19A3H0000187	1201.22	1303.49	1212.11	620.344	530.269	578.531	637.957	10.1013	10.2234	10.1716	9.3092	9.13624	9.22994	9.29594	P	P	P	P	P	P	P	noncoding	nc-HOXD4-22-	nc-HOXD4-22	HOX cluster	706	chr2	+	176996730	176997436		TTCCTTTATAATGAATAGTTCGGGTGCGTTTTGTTTACTCCTAAAAGGTTTCTTTGCGTA
ASHG19A3H0000187	1201.22	1303.49	1212.11	620.344	530.269	578.531	637.957	10.1013	10.2234	10.1716	9.3092	9.13624	9.22994	9.29594	P	P	P	P	P	P	P	noncoding	nc-HOXD4-22-	nc-HOXD4-22	HOX cluster	706	chr2	+	176996730	176997436		TTCCTTTATAATGAATAGTTCGGGTGCGTTTTGTTTACTCCTAAAAGGTTTCTTTGCGTA
ASHG19A3H0000147	167.851	178.429	169.161	224.701	197.609	199.305	252.067	7.46126	7.53735	7.50216	7.75164	7.62954	7.60797	7.88209	P	P	P	P	P	P	P	noncoding	nc-HOXC6-351-	nc-HOXC6-351	HOX cluster	875	chr12	+	54406545	54407420		AAAATAATAGAAGCTGGAATGACTTGCTTTTTCTCCACAGCTCTTCCCTATTCTCTACCT
CUST_68_PI426075208	1979.29	1985.43	2078.99	2761.64	2474.98	2474.01	2831.8	10.8055	10.8176	10.9311	11.5358	11.4113	11.3861	11.5175	P	P	P	P	P	P	P	noncoding	nc-HOXB9-195+	nc-HOXB9-195	HOX cluster	138	chr17	+	46780481	46780619		GGGTCTTGGTTAGCTTCTTTGCTATTTCCCCTCCTTACTCTTTTCTTCTCCCCTGTCTCC
ASHG19A3H0000002	65.2844	61.9733	62.322	40.4207	40.5072	44.5326	51.3851	6.15886	6.09727	6.13341	5.16959	5.2492	5.37265	5.47469	P	P	P	P	P	P	P	noncoding	nc-HOXA10-82-	nc-HOXA10-82	HOX cluster	370	chr7	-	27220757	27221127		TTGGAGGGGGTGGAAAAGGTATTGAGAATGGTCTTTTTAATCTCTTGCAACATTTGGAAA
ASHG19A3H0000045	16.4847	13.0859	10.0097	22.8478	24.2668	29.4162	31.5096	4.20466	4.08676	3.61921	4.30663	4.47749	4.74918	4.73565	A	A	A	P	P	P	P	noncoding	nc-HOXB3-165-	nc-HOXB3-165	HOX cluster	346	chr17	-	46651812	46652158		ACCACATCTCCAAAAAGCTCGGGGCTCGGGAGAGCATATGCAATTAAAAGTCGTTTTTTC
CUST_80_PI426075208	49.5406	42.3051	41.3576	108.016	97.4839	99.3803	95.189	5.772	5.58813	5.56898	6.64758	6.56171	6.562	6.39533	P	P	P	P	P	P	P	noncoding	nc-HOXA13-96+	nc-HOXA13-96	HOX cluster	318	chr7	+	27240358	27240676		TTTGCATTTAGACCCATAGACTCAGAACGACTCATCACACACACACACAGTGTACACTGA
CUST_74_PI426075208	104.329	96.3387	105.347	208.602	161.912	144.255	159.722	6.81545	6.7039	6.8602	7.63516	7.33105	7.12067	7.18159	P	P	P	P	P	P	P	noncoding	nc-HOXB9-203+	nc-HOXB9-203	HOX cluster	118	chr17	+	46799885	46800003		AAGAAGGCCTGCGGTTGGTGGCTCCCCACCTCATAGCTGCAAGTAGGGGCGAAAGCTGGA
ASHG19A3H0000122	22364.4	23795.4	23595.5	47787.3	49076.6	46490.9	48905.8	14.2041	14.3204	14.3469	15.7569	15.7616	15.6975	15.6834	P	P	P	P	P	P	P	noncoding	nc-HOXC13-102-	nc-HOXC13-102	HOX cluster	108	chr12	+	54332232	54332340		CCCTACACCCCTTTGCGTCGGCCAAATTCAGCCTCCCCCCCCTCCCTCTCCCTCCCTGGG
CUST_51_PI426075208	5607.33	5460.91	4855.07	4987.51	6814.16	4850.26	6503.28	12.2834	12.2635	12.1314	12.409	12.9007	12.3647	12.7401	P	P	P	M	M	M	M	noncoding	nc-HOXB4-173+	nc-HOXB4-173	HOX cluster	138	chr17	+	46664300	46664438		AATCCCCCACCCCGCCAACCATTACCACCATGAGACTTGTGTGTGGAGTTGACTGTAGAG
CUST_211_PI426075208	31.6824	32.6873	29.9341	63.8068	62.6042	77.783	68.2858	5.14296	5.24457	5.12351	5.85878	5.9101	6.19864	5.90411	P	P	P	P	P	P	P	noncoding	nc-HOXD1-46+	nc-HOXD1-46	HOX cluster	2057	chr2	-	177037828	177039885		GCGAGATAAAGGCATAGTGATCTGCTTGCAAGTGTGCATGATTAACACAGATACAGTTCC
ASHG19A3A047642	37.7866	38.7708	50.0968	61.4995	62.4899	53.3837	61.2291	5.38899	5.46975	5.83117	5.80438	5.90739	5.64482	5.73618	P	P	P	P	P	P	P	noncoding	ENST00000512916	AC012531.10	Ensembl	724	chr12	-	54329795	54333427		AAATTTAGTGGCGAGAAGAAAGAAAGGGAACCATAGTCCTCTTCCTCAAGAAGACCAGCC
CUST_151_PI426075208	601.63	617.617	606.877	440.542	413.243	487.616	474.953	9.1794	9.21008	9.23137	8.78293	8.73738	8.96954	8.83802	P	P	P	P	P	P	P	noncoding	nc-HOXC8-146+	nc-HOXC8-146	HOX cluster	108	chr12	-	54400135	54400243		ATTACGCGCTGCCTGCTTTGCACTTATCTCCTCCACAAAGCGATTATTTTTAATGCCTGC
ASHG19A3H0000200	2011.03	2062.25	2034.72	2160.37	1776.86	2168.07	2247.48	10.8331	10.8816	10.9059	11.1839	10.9226	11.1912	11.1777	P	P	P	P	P	P	P	noncoding	nc-HOXD8-19-	nc-HOXD8-19	HOX cluster	160	chr2	+	176989526	176989686		GTTCCTGCCCGAGGACCAGTTGTAAATGTTACTGCTTCCTACTAATAAATGCTGACCTGA
CUST_155_PI426075208	47.0202	60.4744	47.2257	46.4926	54.1502	49.3245	47.4346	5.69682	6.06175	5.75047	5.38213	5.6877	5.52409	5.35655	P	P	P	P	P	P	P	noncoding	nc-HOXC8-150+	nc-HOXC8-150	HOX cluster	723	chr12	-	54402165	54402888		TAAGTCTGGAGACTTTGAGGAGGAACAAGCACACCATACTCCCAAATACTTCAGGCATCA
CUST_82_PI426075208	3238.2	3187.71	3303.78	7007.53	2864.5	2818.84	2949.11	11.5047	11.4866	11.5924	12.9091	11.6294	11.5705	11.5833	P	P	P	P	P	P	P	noncoding	nc-HOXA1-54+	nc-HOXA1-54	HOX cluster	128	chr7	+	27136437	27136565		TCCCTCTCTCGTCGCTCTCCGCCCCTTTCTCTTTCCCACTCAGTTTTGCACCGGGAGCCC
CUST_82_PI426075208	3238.2	3187.71	3303.78	7007.53	2864.5	2818.84	2949.11	11.5047	11.4866	11.5924	12.9091	11.6294	11.5705	11.5833	P	P	P	P	P	P	P	noncoding	nc-HOXA1-54+	nc-HOXA1-54	HOX cluster	128	chr7	+	27136437	27136565		TCCCTCTCTCGTCGCTCTCCGCCCCTTTCTCTTTCCCACTCAGTTTTGCACCGGGAGCCC
ASHG19A3H0000209	31.7124	27.5058	37.0224	61.5155	54.3146	57.2201	64.0713	5.14469	5.01478	5.41561	5.80499	5.69212	5.74424	5.80854	P	P	P	P	P	P	P	noncoding	nc-HOXC9-139-	nc-HOXC9-139	HOX cluster	148	chr12	+	54391685	54391833		AGGGGGACTGGAACCTCCTGTCTTTTCCTTGAACTAGTGAGGGAGATTTTTTGATTGACA
CUST_124_PI426075208	31.6317	53.134	23.3073	137.628	122.169	107.565	118.703	5.13966	5.88766	4.77229	7.00511	6.90263	6.67924	6.73641	P	P	P	P	P	P	P	noncoding	nc-HOXC4-153+	nc-HOXC4-153	HOX cluster	519	chr12	-	54408220	54408739		TAGCAATCATAATTCCACGTTTAAAAACGAAACGGGACCTCAGCCATCCCTCGGAGTATG
ASHG19A3H0000064	4566.41	4929.52	5085.11	9886.17	8786.71	10049.3	9238.53	11.9937	12.1141	12.1957	13.428	13.2905	13.4409	13.2509	P	P	P	P	P	P	P	noncoding	nc-HOXB9-187-	nc-HOXB9-187	HOX cluster	168	chr17	-	46715907	46716075		TGGCTCTCTGTGAACAAAGCAGGTTTCCTCCTTGCCACTCACCCCCACCCCCCATACCAC
ASHG19A3H0000033	83.281	63.5772	60.1225	77.5199	77.6519	77.7138	81.8327	6.50529	6.1309	6.08288	6.15445	6.2268	6.19741	6.17516	P	P	P	P	P	P	P	noncoding	nc-HOXA7-73-	nc-HOXA7-73	HOX cluster	148	chr7	-	27196467	27196615		AGGGATGGGGAGGATCCCAAGCTTGGTCCAGGGCTCACTAGCAGGAGTCGGCGGGGGGGC
CUST_66_PI426075208	63.8972	60.2214	59.0015	73.4531	87.7697	75.5382	79.6513	6.12469	6.05621	6.05848	6.07286	6.4052	6.15653	6.13613	P	P	P	P	P	P	P	noncoding	nc-HOXB9-189+	nc-HOXB9-189	HOX cluster	138	chr17	+	46720237	46720375		ATAGCAAAGCAAAGGGGACCACTCAGCCCCCAGGAGGAGCCCTGAAGCAAAAAGGTTGCT
CUST_92_PI426075208	236.59	253.694	256.451	213.684	184.775	210.883	212.264	7.92569	8.00933	8.06274	7.67112	7.52678	7.69481	7.61408	P	P	P	P	P	P	P	noncoding	nc-HOXB6-181+	nc-HOXB6-181	HOX cluster	278	chr17	+	46683490	46683768		GCCACACCGGCCTGGTAAACTCGCACCTCTTAGGATCTTGCTCCCGGACTCATTCCCTTC
ASHG19A3H0000043	323.093	314.015	332.138	629.85	625.008	641.765	714.728	8.3479	8.30033	8.42406	9.33313	9.37966	9.38102	9.47121	P	P	P	P	P	P	P	noncoding	nc-HOXB2-160-	nc-HOXB2-160	HOX cluster	310	chr17	-	46622394	46622704		GGGGCTCATGGTGTCCTGGTCGTGGTCCTCTGGTGTTTTTGAATCAATTAAACCAAATAA
CUST_41_PI426075208	16.0477	24.2431	27.1574	39.3259	32.5635	41.4802	44.9937	4.16734	4.84894	4.98956	5.13069	4.92265	5.26322	5.27666	A	A	P	P	P	P	P	noncoding	nc-HOXB1-159+	nc-HOXB1-159	HOX cluster	608	chr17	+	46618416	46619024		TGATACGTGAAATGAAGTTGTTGGTCAAGACTGGTGGGTCTGCATTCAGAGAAAGCTCTG
ASHG19A3H0000022	855.969	862.131	921.133	1046.07	821.817	843.462	800.178	9.64331	9.66536	9.79885	10.111	9.78706	9.78992	9.63758	P	P	P	P	P	P	P	noncoding	nc-HOXA2-60-	nc-HOXA2-60	HOX cluster	148	chr7	-	27142497	27142645		TAGATAGATCCTTGCAGATCAGGAGGCACGCAGGCACCCTCGCCCCCACGTACTCCGGGA
CUST_193_PI426075208	62.3641	47.0673	35.449	56.3121	57.8999	55.0315	51.9614	6.09068	5.73076	5.35278	5.66786	5.79055	5.68692	5.49294	P	P	P	P	P	M	M	noncoding	nc-HOXD4-30+	nc-HOXD4-30	HOX cluster	108	chr2	-	177009879	177009987		AGAGAGAGGGAAAGATGCCCTCAGCTCCCACCAAGGAGCATAAATAAAAAGAGAATTGAC
CUST_35_PI426075208	51.4978	40.2024	48.8606	152.399	141.306	148.512	127.448	5.82358	5.5162	5.79961	7.15957	7.12482	7.16583	6.83753	P	P	P	P	P	P	P	noncoding	nc-HOXA7-75+	nc-HOXA7-75	HOX cluster	108	chr7	+	27200477	27200585		GGGTCAGGGAGGCGCGAGCGGTGAGGGTCGGGCAAGCCCCCGCCGATTCCTTGTTTCCCA
ASHG19A3H0000083	16.3621	18.5562	12.2334	66.4246	48.7519	53.1733	57.7701	4.19501	4.51455	3.88655	5.91744	5.52708	5.63768	5.65361	A	A	A	P	P	P	P	noncoding	nc-HOXA1-55-	nc-HOXA1-55	HOX cluster	328	chr7	-	27136777	27137105		AACCTAATAGTAAACAACAATTTAACGACCTCAGCAGCCTCAGGGAAGTAGGGTGATGAG
CUST_26_PI426075208	22.2792	25.406	25.2935	86.9915	75.6824	69.6447	75.9243	4.64136	4.90644	4.88724	6.33163	6.18904	6.04313	6.06306	A	P	P	P	P	P	P	noncoding	nc-HOXA4-64+	nc-HOXA4-64	HOX cluster	138	chr7	+	27178897	27179035		CCTTGGTCCTCAGGGTCCAGTGGGCGCTAGCAGCCCAGGATCCACCTTGCAACCCGGGGG
ASHG19A3H0000054	78.7149	106.105	84.5197	211.043	190.886	171.732	199.8	6.43343	6.83141	6.56144	7.65393	7.57522	7.38467	7.52353	P	P	P	P	P	P	P	noncoding	nc-HOXB4-176-	nc-HOXB4-176	HOX cluster	158	chr17	-	46667810	46667968		CAAGTCTGGACACTTACCCGGTCAATCCCTTCCAGCTTGGCCCAACTTCTTACTGGACTT
ASHG19A3H0000053	18.3872	10.161	23.545	39.4289	36.8408	36.3816	33.8737	4.36406	3.79159	4.78424	5.13423	5.1068	5.06756	4.84352	A	P	P	M	M	P	M	noncoding	nc-HOXB4-175-	nc-HOXB4-175	HOX cluster	148	chr17	-	46667190	46667338		GAAATGAGTGCTCTCAGTTTCTTAAGGCCTCATCGGTCGGGGGTGCCTGATTTTTACCAA
ASHG19A3A047643	4678.81	4203.86	3980.25	730.026	713.952	620.602	738.738	12.0303	11.8874	11.8561	9.55935	9.57881	9.3325	9.51718	P	P	P	P	P	P	P	noncoding	NR_003716	HOTAIR	RefSeq_NR	2337	chr12	-	54356097	54362515		CCTTGTGTAGGTTGTGTGTGTGTGGTGGTTTTATGCATAAATAAAGTTTTACATGTGGTG
CUST_100_PI426075208	51.2079	61.2762	63.2627	94.7187	89.03	84.0245	93.3843	5.81509	6.07877	6.15335	6.45669	6.4254	6.3087	6.3659	P	P	P	P	P	P	P	noncoding	nc-HOXC10-121+	nc-HOXC10-121	HOX cluster	248	chr12	-	54373384	54373632		ATCAGCAGTCTGAGTCAAGGTTATGGGTCTTTGCTTTGTGCAGTGGGTTGGAGGGGTGCG
CUST_20_PI426075208	128.882	127.112	119.796	88.7999	92.1043	80.0521	87.999	7.10044	7.07831	7.03431	6.36278	6.47668	6.24012	6.27994	P	P	P	P	P	P	P	noncoding	nc-HOXA1-58+	nc-HOXA1-58	HOX cluster	148	chr7	+	27138197	27138345		AAGAAATTCTGGGGGCCGTTCCACCGAGTAGGAGATCCTTGGCCCTCTAGGCAAGTAGGT
ASHG19A3H0000014	12526	12799.1	13365.7	10964.9	10088.2	11016.7	11043.7	13.3984	13.4501	13.5507	13.5883	13.4823	13.578	13.5057	P	P	P	P	P	P	P	noncoding	nc-HOXA13-95-	nc-HOXA13-95	HOX cluster	218	chr7	-	27239898	27240116		TCGCAACCCAATCGCGCGCCCACCTCCCCTCCCCGCCTGGTTGCGCGGGTCTGGGCCCCA
CUST_146_PI426075208	960.161	976.946	952.076	1115.67	933.237	881.96	1003.41	9.81053	9.83008	9.84596	10.2063	9.98316	9.85371	9.99133	P	P	P	P	P	P	P	noncoding	nc-HOXC6-252+	nc-HOXC6-252	HOX cluster	442	chr12	-	54421751	54422193		GTTTTATATCTGCCCCCTTCTAAAATTACATCCTGATTTCTCCAAGGGAAGAACTCCCTC
CUST_146_PI426075208	960.161	976.946	952.076	1115.67	933.237	881.96	1003.41	9.81053	9.83008	9.84596	10.2063	9.98316	9.85371	9.99133	P	P	P	P	P	P	P	noncoding	nc-HOXC6-252+	nc-HOXC6-252	HOX cluster	442	chr12	-	54421751	54422193		GTTTTATATCTGCCCCCTTCTAAAATTACATCCTGATTTCTCCAAGGGAAGAACTCCCTC
CUST_146_PI426075208	960.161	976.946	952.076	1115.67	933.237	881.96	1003.41	9.81053	9.83008	9.84596	10.2063	9.98316	9.85371	9.99133	P	P	P	P	P	P	P	noncoding	nc-HOXC6-252+	nc-HOXC6-252	HOX cluster	442	chr12	-	54421751	54422193		GTTTTATATCTGCCCCCTTCTAAAATTACATCCTGATTTCTCCAAGGGAAGAACTCCCTC
CUST_113_PI426075208	425.921	470.479	442.644	956.334	856.282	845.481	1038.36	8.72398	8.84577	8.80794	9.98079	9.84905	9.79329	10.04	P	P	P	P	P	P	P	noncoding	nc-HOXC11-111+	nc-HOXC11-111	HOX cluster	698	chr12	-	54360504	54361202		TTATTTTCCTCTCCTTCTTTCTCTCTGTTCATCCCCAGTGCTACCCTGGAGGAAAAGGAT
ASHG19A3H0000168	32.8762	19.6933	33.3853	83.407	46.9113	56.7196	55.2661	5.19509	4.58882	5.27057	6.26813	5.47044	5.73299	5.58643	A	P	P	P	P	P	P	noncoding	nc-HOXD10-14-	nc-HOXD10-14	HOX cluster	258	chr2	+	176980948	176981206		ATCTTTCCTTTGGACCCCTGGGGTGGGATGTCTCAGGGCCCGCGGAATCCGACTCACCTT
CUST_172_PI426075208	40.9087	39.7618	39.2944	54.2999	41.1419	48.8079	54.65	5.49673	5.50285	5.49837	5.61794	5.27557	5.50791	5.5689	P	P	P	P	P	P	P	noncoding	nc-HOXD11-4+	nc-HOXD11-4	HOX cluster	488	chr2	-	176968082	176968570		AAAGAAACGGCCTCCGTGTTTTCTGTCTTAAGGCCTGGATCTGAGTTCATATGCTTTCCT
ASHG19A3H0000018	795.73	849.961	815.793	1050.97	1004.59	1043.91	1165.03	9.54616	9.64738	9.63798	10.1201	10.091	10.1182	10.2126	P	P	P	P	P	P	P	noncoding	nc-HOXA1-56-	nc-HOXA1-56	HOX cluster	318	chr7	-	27137277	27137595		TTTCCTGCCCGTGCTCCCTCTTAACCATGCTTGGGATGGATCAAAGTCACAAATACTATT
ASHG19A3H0000139	18.7497	29.3946	19.5512	72.6096	47.7996	56.9576	54.7783	4.3944	5.10035	4.53706	6.05175	5.49919	5.73777	5.57274	P	A	P	P	P	P	P	noncoding	nc-HOXC6-245-	nc-HOXC6-245	HOX cluster	218	chr12	+	54416621	54416839		TTCTTCCTCATGTGACATCCTCTTGAGGCCCTATTCTGGGGGCTGAAAATATTCTGGATA
ASHG19A3H0000139	18.7497	29.3946	19.5512	72.6096	47.7996	56.9576	54.7783	4.3944	5.10035	4.53706	6.05175	5.49919	5.73777	5.57274	P	A	P	P	P	P	P	noncoding	nc-HOXC6-245-	nc-HOXC6-245	HOX cluster	218	chr12	+	54416621	54416839		TTCTTCCTCATGTGACATCCTCTTGAGGCCCTATTCTGGGGGCTGAAAATATTCTGGATA
CUST_9_PI426075208	67.8521	70.4227	68.1988	108.344	94.6197	110.957	117.393	6.21588	6.27141	6.25502	6.65157	6.52294	6.72302	6.71662	P	P	P	P	P	P	P	noncoding	nc-HOXA11-91+	nc-HOXA11-91	HOX cluster	118	chr7	+	27232517	27232635		AACCACCTTCCACGCTGCCAAGAATTAAGACCGGGAGAGATTAAATACCCGATTATTCTC
CUST_176_PI426075208	20.5315	11.246	26.8717	40.3083	39.0042	44.0211	49.8016	4.52667	3.90971	4.97561	5.16575	5.19409	5.35335	5.42631	A	P	P	P	P	P	P	noncoding	nc-HOXD1-47+	nc-HOXD1-47	HOX cluster	1188	chr2	-	177040097	177041285		TATCCTGCCTTAATTCATATTTGATTGCCTGGACAGAACCACCTAGAATGTCCAGACGAC
ASHG19A3H0000166	389.3	410.287	382.172	409.742	369.352	446.531	438.274	8.60006	8.66871	8.62128	8.67175	8.56621	8.83232	8.7134	M	M	M	P	P	M	M	noncoding	nc-HOXD10-12-	nc-HOXD10-12	HOX cluster	158	chr2	+	176977788	176977946		CGTCTGGATAGACCCCTTATTGCATTGGTGGTAGACTCCCCATTTGCCCCCTAGATTTCC
ASHG19A3H0000108	188.781	195.813	209.119	226.439	214.961	224.503	208.472	7.62399	7.66419	7.78897	7.76506	7.75674	7.78949	7.58977	P	P	P	P	P	P	P	noncoding	nc-HOXC11-106-	nc-HOXC11-106	HOX cluster	158	chr12	+	54351436	54351594		AAGGGGCTACCAGCCATTGAGGTCCCACTCAGCCCCAGTTTCCCAGGCCCGTGAGAATGA
CUST_101_PI426075208	55.4812	66.3801	68.9387	100.998	88.2109	100.622	107.378	5.93059	6.18945	6.27106	6.54689	6.41251	6.57939	6.58335	P	P	P	P	P	P	P	noncoding	nc-HOXC10-122+	nc-HOXC10-122	HOX cluster	108	chr12	-	54374593	54374701		TGGTTTGCTTCTAAGTTGCCCCCAGTAAGTCAGGTTTCTAGCTAGAGTCGGGGCTGTGGT
ASHG19A3H0000063	103.895	112.277	104.703	263	240.675	235.053	248.508	6.81145	6.91023	6.84909	7.99767	7.93166	7.86294	7.85891	P	P	P	P	P	P	P	noncoding	nc-HOXB9-186-	nc-HOXB9-186	HOX cluster	168	chr17	-	46715352	46715520		TGCACATATTCACACACACACTCACACACAGGAATGCTGACACATACAGACCCGACTTTA
CUST_212_PI426075208	51.4208	54.38	43.0846	61.2271	70.6997	69.0465	76.8228	5.82117	5.917	5.62592	5.79792	6.08438	6.02705	6.07932	P	P	P	P	P	P	P	noncoding	nc-HOXD4-26+	nc-HOXD4-26	HOX cluster	1178	chr2	-	177003288	177004466		AAGAATTAATGCTACCACGGGGCTTACAAAGAACCCCTCAAGTCTTCCAAATCTGCCCAT
ASHG19A3H0000098	112.979	125.274	100.881	106.627	125.261	138.638	141.474	6.92152	7.05863	6.79799	6.62735	6.94268	7.05979	7.00345	P	P	P	P	P	P	P	noncoding	nc-HOXC10-119-	nc-HOXC10-119	HOX cluster	138	chr12	+	54371854	54371992		AAAAAGGAGGAAAAAGGGTTTTTTGGCCCCCAAACAAACCCACCTTCCGTCTCCCAAGGT
ASHG19A3H0000199	349.474	391.996	371.475	544.508	507.745	494.334	552.691	8.4565	8.60422	8.58199	9.11902	9.06924	8.98931	9.07885	P	P	P	P	P	P	P	noncoding	nc-HOXD4-36-	nc-HOXD4-36	HOX cluster	262	chr2	+	177015849	177016111		ACTCTGCCCAACTCAGAGGCGAGTTCACCCACCCACCTTTCATTGCTCTGTACCCCAATA
ASHG19A3A000386	155.257	61.2339	59.1415	65.5107	60.2833	58.4931	65.9898	7.35245	6.0778	6.06165	5.89695	5.85104	5.77476	5.84992	P	P	P	P	P	P	P	noncoding	ENST00000465846	RP11-357H14.7	Ensembl	419	chr17	+	46627246	46679694		ATTTGGGGGGAATTACCTACAAAGATGTAAGGTTGCTTGTCTGGAGATGGAGCCACTACA
ASHG19A3A000386	155.257	61.2339	59.1415	65.5107	60.2833	58.4931	65.9898	7.35245	6.0778	6.06165	5.89695	5.85104	5.77476	5.84992	P	P	P	P	P	P	P	noncoding	ENST00000465846	RP11-357H14.7	Ensembl	419	chr17	+	46627246	46679694		ATTTGGGGGGAATTACCTACAAAGATGTAAGGTTGCTTGTCTGGAGATGGAGCCACTACA
ASHG19A3A000386	155.257	61.2339	59.1415	65.5107	60.2833	58.4931	65.9898	7.35245	6.0778	6.06165	5.89695	5.85104	5.77476	5.84992	P	P	P	P	P	P	P	noncoding	ENST00000465846	RP11-357H14.7	Ensembl	419	chr17	+	46627246	46679694		ATTTGGGGGGAATTACCTACAAAGATGTAAGGTTGCTTGTCTGGAGATGGAGCCACTACA
ASHG19A3A000386	155.257	61.2339	59.1415	65.5107	60.2833	58.4931	65.9898	7.35245	6.0778	6.06165	5.89695	5.85104	5.77476	5.84992	P	P	P	P	P	P	P	noncoding	ENST00000465846	RP11-357H14.7	Ensembl	419	chr17	+	46627246	46679694		ATTTGGGGGGAATTACCTACAAAGATGTAAGGTTGCTTGTCTGGAGATGGAGCCACTACA
CUST_157_PI426075208	16.9691	8.57849	9.97775	40.2944	36.9905	35.396	57.9763	4.2463	3.60619	3.61571	5.16513	5.11287	5.02505	5.65864	A	A	A	M	M	P	P	noncoding	nc-HOXC9-131+	nc-HOXC9-131	HOX cluster	198	chr12	-	54384395	54384593		TTAAGTTTATTCCTTTCCTTGGATGGGTGGGGGGCTCTTGGGGTGACCCCCAGCAGCAGT
ASHG19A3H0000106	88.8665	111.182	46.7033	146.855	147.668	117.938	187.825	6.59141	6.89714	5.73571	7.10495	7.19087	6.81965	7.42591	P	P	P	M	P	P	P	noncoding	nc-HOXC10-127-	nc-HOXC10-127	HOX cluster	248	chr12	+	54377713	54377961		ACGGTTCCCCTTATTTCTTCCTTTTATTTAAAAACAACCACAAAAATAGACTGGTCTGTC
ASHG19A3A009657	630.681	773.159	599.151	801.111	745.794	789.702	816.986	9.24438	9.51277	9.21162	9.70544	9.63971	9.69704	9.67046	P	P	P	P	P	P	P	noncoding	NR_024103	C17orf93	RefSeq_NR	564	chr17	+	46800541	46802119		GAATGGTATAAATTTCAAAAACAACGAAACCTTCTTTTGCCCCCTCCGCAGCAGTCGCCT
CUST_91_PI426075208	37.9689	42.1539	44.9261	81.4537	95.4127	68.1328	87.3425	5.39543	5.58216	5.68499	6.23473	6.53277	6.00642	6.26908	P	P	P	P	P	P	P	noncoding	nc-HOXB4-169+	nc-HOXB4-169	HOX cluster	1198	chr17	+	46659750	46660948		TTTTCTTGGGTTTGTCTCTCCAGGATTAGAATCTGGTGGATTGCCTACAACACACTTCTC
ASHG19A3H0000099	98.5827	120.09	101.459	97.3321	101.417	101.442	108.983	6.74109	6.99978	6.80574	6.4938	6.62267	6.59077	6.60275	P	P	P	P	P	P	P	noncoding	nc-HOXC10-120-	nc-HOXC10-120	HOX cluster	208	chr12	+	54372104	54372312		GCCCTAAATAGTAAACAAACCTGTAGTGGAGGGTCTTGGCTCTCCCAACACACTCAGACC
CUST_138_PI426075208	389.232	456.35	365.418	726.427	645.8	635.349	764.415	8.59988	8.80794	8.55797	9.5505	9.42534	9.36459	9.56902	P	P	P	P	P	P	P	noncoding	nc-HOXC6-244+	nc-HOXC6-244	HOX cluster	1488	chr12	-	54415121	54416609		ACATTGATATTTCCCCTCTGCTCTGTCTTTTTGTGTCTCTGGAAGGGAAAAAGGCTGGGA
CUST_138_PI426075208	389.232	456.35	365.418	726.427	645.8	635.349	764.415	8.59988	8.80794	8.55797	9.5505	9.42534	9.36459	9.56902	P	P	P	P	P	P	P	noncoding	nc-HOXC6-244+	nc-HOXC6-244	HOX cluster	1488	chr12	-	54415121	54416609		ACATTGATATTTCCCCTCTGCTCTGTCTTTTTGTGTCTCTGGAAGGGAAAAAGGCTGGGA
ASHG19A3H0000134	15.5653	46.4498	19.5185	17.9038	20.8577	18.2696	23.4026	4.12754	5.71202	4.53499	3.93197	4.25864	4.01866	4.27593	P	A	P	P	P	P	P	noncoding	nc-HOXC6-240-	nc-HOXC6-240	HOX cluster	288	chr12	+	54412701	54412989		GGGGGCGGGGATGGGGGAAGAAACCTGTTTTTATCAAATTTTTAAAAATACAGTTTGCAT
ASHG19A3H0000134	15.5653	46.4498	19.5185	17.9038	20.8577	18.2696	23.4026	4.12754	5.71202	4.53499	3.93197	4.25864	4.01866	4.27593	P	A	P	P	P	P	P	noncoding	nc-HOXC6-240-	nc-HOXC6-240	HOX cluster	288	chr12	+	54412701	54412989		GGGGGCGGGGATGGGGGAAGAAACCTGTTTTTATCAAATTTTTAAAAATACAGTTTGCAT
CUST_180_PI426075208	23.1607	19.2877	26.4678	33.5476	22.6009	31.7939	31.8167	4.70409	4.56156	4.95441	4.88992	4.37395	4.86522	4.7496	A	P	P	P	P	P	P	noncoding	nc-HOXD3-38+	nc-HOXD3-38	HOX cluster	208	chr2	-	177018249	177018457		CCTTTTTAAGATTTTTGGCATGAAGGTGTCAGTTATTTCTGTACCACATTTCCCAACAAA
CUST_134_PI426075208	1284.28	1438.22	1292.2	1235.36	1239.89	1185	1234.38	10.1981	10.3544	10.2611	10.359	10.3955	10.3084	10.308	P	P	P	P	P	P	P	noncoding	nc-HOXC6-240+	nc-HOXC6-240	HOX cluster	288	chr12	-	54412701	54412989		ATGCAAACTGTATTTTTAAAAATTTGATAAAAACAGGTTTCTTCCCCCATCCCCGCCCCC
CUST_134_PI426075208	1284.28	1438.22	1292.2	1235.36	1239.89	1185	1234.38	10.1981	10.3544	10.2611	10.359	10.3955	10.3084	10.308	P	P	P	P	P	P	P	noncoding	nc-HOXC6-240+	nc-HOXC6-240	HOX cluster	288	chr12	-	54412701	54412989		ATGCAAACTGTATTTTTAAAAATTTGATAAAAACAGGTTTCTTCCCCCATCCCCGCCCCC
CUST_81_PI426075208	5650.59	5846.53	5787.89	5575.61	7364.59	6901.19	7081.29	12.2937	12.3628	12.3908	12.5749	13.0166	12.8852	12.8601	P	P	P	P	P	P	P	noncoding	nc-HOXA1-53+	nc-HOXA1-53	HOX cluster	138	chr7	+	27135887	27136025		CGCCCCCTCCCCACCGTTCAATGAAAGATGAACTGGCGAGAGGTGAGAAGGGAAGAGGGC
CUST_81_PI426075208	5650.59	5846.53	5787.89	5575.61	7364.59	6901.19	7081.29	12.2937	12.3628	12.3908	12.5749	13.0166	12.8852	12.8601	P	P	P	P	P	P	P	noncoding	nc-HOXA1-53+	nc-HOXA1-53	HOX cluster	138	chr7	+	27135887	27136025		CGCCCCCTCCCCACCGTTCAATGAAAGATGAACTGGCGAGAGGTGAGAAGGGAAGAGGGC
CUST_94_PI426075208	368.862	408.549	392.946	321.879	460.045	461.565	477.494	8.52864	8.66346	8.65581	8.30208	8.91285	8.8832	8.84558	P	P	P	P	P	P	P	noncoding	nc-HOXB9-193+	nc-HOXB9-193	HOX cluster	858	chr17	+	46768301	46769159		TTCCTCTGGGGCCCTTCACAATAACTGTGCATCCCTTCAGAGTAATGTCAACATTTTCTG
ASHG19A3H0000116	4835.71	5054.79	5089.6	4211.34	3581.3	4091.51	3645.87	12.0714	12.1505	12.1971	12.1553	11.949	12.1158	11.8869	P	P	P	P	P	P	P	noncoding	nc-HOXC11-114-	nc-HOXC11-114	HOX cluster	128	chr12	+	54364584	54364712		CTCCTCACAGGATACAGCCCCTACCCCCATCTCAGTCCTGGCTTTGCTGAATCTGCCTTG
ASHG19A3A014666	14.6374	14.3825	16.0907	48.2525	50.0039	83.0706	56.2623	4.04711	4.19969	4.27154	5.4355	5.56618	6.29006	5.61281	A	A	A	P	P	P	P	noncoding	ENST00000440016	AC009336.21	Ensembl	582	chr2	-	176987087	177001741		TCGCTGACTCTCCAGCTTCCGAGCCGCGGGCGGCGAGTCCAGGGCACACGGAGCGGCCGC
ASHG19A3A014666	14.6374	14.3825	16.0907	48.2525	50.0039	83.0706	56.2623	4.04711	4.19969	4.27154	5.4355	5.56618	6.29006	5.61281	A	A	A	P	P	P	P	noncoding	ENST00000440016	AC009336.21	Ensembl	582	chr2	-	176987087	177001741		TCGCTGACTCTCCAGCTTCCGAGCCGCGGGCGGCGAGTCCAGGGCACACGGAGCGGCCGC
ASHG19A3A014666	14.6374	14.3825	16.0907	48.2525	50.0039	83.0706	56.2623	4.04711	4.19969	4.27154	5.4355	5.56618	6.29006	5.61281	A	A	A	P	P	P	P	noncoding	ENST00000440016	AC009336.21	Ensembl	582	chr2	-	176987087	177001741		TCGCTGACTCTCCAGCTTCCGAGCCGCGGGCGGCGAGTCCAGGGCACACGGAGCGGCCGC
ASHG19A3A014666	14.6374	14.3825	16.0907	48.2525	50.0039	83.0706	56.2623	4.04711	4.19969	4.27154	5.4355	5.56618	6.29006	5.61281	A	A	A	P	P	P	P	noncoding	ENST00000440016	AC009336.21	Ensembl	582	chr2	-	176987087	177001741		TCGCTGACTCTCCAGCTTCCGAGCCGCGGGCGGCGAGTCCAGGGCACACGGAGCGGCCGC
CUST_40_PI426075208	17350.7	19078.9	16824	9502.34	10593.3	11135.8	11195.8	13.858	14.02	13.8734	13.3712	13.5579	13.6006	13.5313	P	P	P	P	P	P	P	noncoding	nc-HOXB1-156+	nc-HOXB1-156	HOX cluster	128	chr17	+	46609401	46609529		TCTCCTGGTTCCCTCCTACCTGTCTCTCCTTCACCACCCTCCATCTCCTTCCAAAAAAAA
ASHG19A3A009656	1306.01	1388.3	1290.25	519.256	488.48	531.431	519.603	10.2256	10.305	10.26	9.04876	9.00504	9.0968	8.97778	P	P	P	P	P	P	P	noncoding	ENST00000489624	COX6B1P2	Ensembl	216	chr17	+	46791091	46791307		TTTGTATGTGAATGGTACCAGCCTGTGTACAAGTCCCTCATTCCCATATCCTGGATCTCA
CUST_12_PI426075208	579.29	842.613	699.812	865.636	982.207	981.779	1015.61	9.1197	9.6351	9.42627	9.8255	10.06	10.0277	10.0114	P	P	P	P	P	P	P	noncoding	nc-HOXA13-100+	nc-HOXA13-100	HOX cluster	916	chr7	+	27245788	27246704		ACTTATTAGTGGGTAAATGACTATATTTCATTTCAGCACAACTTCTCCCCTGGTAGAAAC
CUST_168_PI426075208	62.9171	52.2742	56.1256	69.178	80.8603	79.5687	80.756	6.10333	5.8676	5.98943	5.98142	6.28617	6.23015	6.15759	P	P	P	P	P	P	P	noncoding	nc-HOXD10-14+	nc-HOXD10-14	HOX cluster	258	chr2	-	176980948	176981206		AAGGTGAGTCGGATTCCGCGGGCCCTGAGACATCCCACCCCAGGGGTCCAAAGGAAAGAT
CUST_19_PI426075208	100.254	114.994	110.304	120.541	107.412	115.246	113.963	6.76465	6.93928	6.92511	6.81015	6.70845	6.78045	6.67035	P	P	P	P	P	P	P	noncoding	nc-HOXA1-57+	nc-HOXA1-57	HOX cluster	458	chr7	+	27137677	27138135		TTCTGGGGCATCCTGGGTGGAGTGTTTTTCTTGGGATCACGAGCTTGCACTCGCACACAG
CUST_196_PI426075208	63.9759	65.8278	58.6768	73.2769	79.5471	237.028	87.2219	6.12716	6.17856	6.05052	6.06777	6.2601	7.8744	6.26745	P	P	P	P	P	P	P	noncoding	nc-HOXD4-33+	nc-HOXD4-33	HOX cluster	208	chr2	-	177012179	177012387		ATAAAGCAGACACATATAACACACAGAAAAATGACAAGGCCCAGATACCCCACCAATACC
ASHG19A3H0000051	36.2766	27.898	42.4685	31.4087	98.127	34.401	31.3425	5.33492	5.03364	5.60534	4.79502	6.571	4.98143	4.72704	A	P	P	P	P	P	P	noncoding	nc-HOXB4-173-	nc-HOXB4-173	HOX cluster	138	chr17	-	46664300	46664438		CTCTACAGTCAACTCCACACACAAGTCTCATGGTGGTAATGGTTGGCGGGGTGGGGGATT
CUST_213_PI426075208	2801.13	3025.64	2536.8	1407.28	1436.47	1509.2	1823.21	11.2955	11.4133	11.2188	10.5556	10.6279	10.6615	10.8679	P	P	M	P	P	M	P	noncoding	nc-HOXD8-21+	nc-HOXD8-21	HOX cluster	348	chr2	-	176993168	176993516		AATGTCCAATAAATGCAATGGTTCTCTGTTGTGTGTGTGTGTTTTCCCCTCTCCTGCTCG
CUST_213_PI426075208	2801.13	3025.64	2536.8	1407.28	1436.47	1509.2	1823.21	11.2955	11.4133	11.2188	10.5556	10.6279	10.6615	10.8679	P	P	M	P	P	M	P	noncoding	nc-HOXD8-21+	nc-HOXD8-21	HOX cluster	348	chr2	-	176993168	176993516		AATGTCCAATAAATGCAATGGTTCTCTGTTGTGTGTGTGTGTTTTCCCCTCTCCTGCTCG
CUST_213_PI426075208	2801.13	3025.64	2536.8	1407.28	1436.47	1509.2	1823.21	11.2955	11.4133	11.2188	10.5556	10.6279	10.6615	10.8679	P	P	M	P	P	M	P	noncoding	nc-HOXD8-21+	nc-HOXD8-21	HOX cluster	348	chr2	-	176993168	176993516		AATGTCCAATAAATGCAATGGTTCTCTGTTGTGTGTGTGTGTTTTCCCCTCTCCTGCTCG
CUST_177_PI426075208	6968.58	7218.2	6090.6	1416	1390.91	1540.32	1755.13	12.5761	12.6442	12.4531	10.5679	10.58	10.6902	10.8134	M	P	M	P	P	M	M	noncoding	nc-HOXD1-48+	nc-HOXD1-48	HOX cluster	138	chr2	-	177046473	177046611		AGAGACACTTTTTACTAGCATAATTTATATATATGTGTGTGTGTGTGTGTACTCCACAGG
CUST_72_PI426075208	456.672	544.508	488.48	490.772	516.175	519.65	542.161	8.81593	9.03402	8.93684	8.95958	9.09724	9.06435	9.04641	M	M	M	P	M	M	M	noncoding	nc-HOXB9-201+	nc-HOXB9-201	HOX cluster	238	chr17	+	46795819	46796057		AGATTAAGATTGAAAGTCCTTTCTCGCAGCTTCATTTTCGCCCCCACACTGTCCCAAATG
ASHG19A3H0000042	23.2764	27.6448	27.338	23.7221	35.2266	36.6822	32.2147	4.71124	5.022	4.99899	4.36495	5.04134	5.0814	4.76978	A	M	M	P	P	M	M	noncoding	nc-HOXB13-207-	nc-HOXB13-207	HOX cluster	108	chr17	-	46806423	46806531		AAAGCTAGGGAGGGAGAGGAGGAGAAGGAGGTGGGGCCCGGCTCCTCGTCCCCTCTTCCT
