# Supplementary material for: Long Noncoding RNA Expression Signatures of Metastatic Nasopharyngeal Carcinoma and Their Prognostic Value
Source: Biomed Res Int. 2015 Sep 13;2015:618924. doi: 10.1155/2015/618924 (PMC4584063; doi:10.1155/2015/618924)
Supplement: Supplementary file 1 — Table S01. The clinical information corresponding to the seven NPC patient samples used for microarray analysis. Table S02. Four different lncRNA members (LOC84740, ENST00000498296, AL359062, and ENST00000438550) were selected to verify their expression levels via QPCR. This table supply the primer sequences used for Real-time PCR of the four lncRNAs. Table S03. lncRNA Expression Profiling Data. A total of 33,045 lncRNA probes were used in our lncRNA microarray. Up to 30,610 lncRNAs were detected in all seven samples. Table S04. Differentially Expressed lncRNAs. A total of 8,088 lncRNAs were identified to be significantly differentially expressed(≥2-fold) between the metastatic and primary NPC tumors in the microarray. Among these, 3,778 lncRNAs were found to be consistently upregulated; 4,310 lncRNAs were downregulated. Table S05. HOX cluster profiling. In this study, we detected the transcripts in HOX loci, 477 transcribed regions were found. Among them, 257 were ncRNAs and 220 were HOX coding transcripts. Table S06. Differentially expressed IncRNAs at HOX locus. In the four randomly paired groups, the number of differentially expressed lncRNAs differed, but several lncRNAs displayed similar changes in expression. Compared with the NPC primary tumors, 70 lncRNAs were found to be differentially expressed in metastatic tissues; 51 coding transcripts were differentially expressed. Table S07. Rinn lincRNA expression profiles. A total of 4,199 Rinn lincRNAs were detected in this microarray analysis. Table S08. Differentially expressed Rinn lincRNAs. A total of 1,069 Rinn lincRNAs were found to be differentially expressed. Table S09. Enhancer lncRNAs profiles. A total of 1,598 enhancer lncRNAs were detected, of which 468 lncRNAs were differentially expressed. Table S10. Data for enhancer lncRNAs regulating a nearby coding gene. The differentially expressed enhancer lncRNAs and their nearby coding genes (distance < 300 kb) were presented. Table S11. Data for lincRNAs reg [file 618924.f1.zip › S06 Differentially expressd IncRNAs at HOX locus.xls]

## Sheet: M vs T
# Fold-Change cut-off: 2.0 # P-value cut-off: 0.05 # Condition pairs: M vs T This table contains profiling data of all probes in the four HOX loci, targeting 407 discrete transcribed regions (Rinn, Kertesz et al. 2007), LncRNAs and coding transcripts. # Column A: ProbeName, it represents the probe name. # Column B: P, P-value, P-value calculated from paired t-test. # Column C: FC (abs), Absolute …
		Fold Change and Regulation		Raw Intensity							Normalized Intensity							Annotations
ProbeName	p -value	FC (abs)	Regulation	[M1](raw)	[M2](raw)	[M3](raw)	[T1](raw)	[T2](raw)	[T3](raw)	[T4](raw)	[M1](normalized)	[M2](normalized)	[M3](normalized)	[T1](normalized)	[T2](normalized)	[T3](normalized)	[T4](normalized)	type	seqname	GeneSymbol	source	RNAlength	chrom	strand	txStart	txEnd	Xhyb	probeSeq	EntrezID	unigene	GO	ProteinAccession	product
ASHG19A3A008520	1.28779e-06	248.214	up	8282.37	8522.67	8178.56	30.963	30.4286	35.54	37.0429	12.8239	12.8809	12.8684	4.77067	4.8225	5.03219	4.98379	coding	NM_006361	HOXB13	RefSeq_coding	3047	chr17	-	46802128	46806111		GCTATCAGAAACTTAAACTTGAGGATTTTCTCTGTTTTTCACTCGCAATAAATTCAGAGC	10481	Hs.66731	GO:0043565|GO:0003700|GO:0030528|GO:0001525|GO:0008544|GO:0060743|GO:0002009|GO:0007275|GO:0060527|GO:0040008|GO:0006355|GO:0009611|GO:0005634|GO:0005667	NP_006352	Homeobox B13
ASHG19A3A048658	1.59036e-06	8.92664	up	585.309	582.232	602.29	71.512	69.0341	68.914	67.9303	9.13273	9.12509	9.21983	6.03207	6.05393	6.02405	5.89436	coding	NM_014212	HOXC11	RefSeq_coding	2100	chr12	+	54366909	54370201		TGCTGGGGCCTGGATTTTTGTAAATAAATTTCCCAAGCGTTTCTTTCCACCTGGAGGGAA	3227	Hs.127562	GO:0003702|GO:0043565|GO:0003700|GO:0009952|GO:0042733|GO:0007492|GO:0001656|GO:0007275|GO:0001759|GO:0009954|GO:0006355|GO:0001501|GO:0005634	NP_055027	Homeobox C11
CUST_14_PI426249100	2.23185e-06	64.6123	up	15449.8	16093.2	15529.5	226.212	210.85	197.264	241.184	13.6925	13.7637	13.7554	7.76249	7.72695	7.59122	7.8132	coding	NM_004503_Exon2+	NM_004503	HOX cluster	1168	chr12	+	54423438	54424606	NM_153693,NM_004503,	TACCCTCCTGTATAAATCCAACCTCTGGGTCCGTTCTCGAATATTTAATAAAACTGATAT
CUST_53_PI426249100	3.26976e-06	5.22974	up	2869.96	2798.25	2715.67	460.577	460.438	479.638	523.338	11.3335	11.2909	11.315	8.85649	8.91415	8.94286	8.99201	coding	NM_002148_Exon2+	NM_002148	HOX cluster	988	chr2	+	176983681	176984669	nc-HOXD9-16-,NM_002148,	TGTCCTTTCTGTGCATGTTCTGGTCGCATGTATAATGCAATAAACTCTGGAAATGAGTTC
CUST_6_PI426249100	4.24176e-06	7.99389	up	590.134	604.88	582.54	81.281	78.0887	72.2809	77.9711	9.1501	9.17714	9.16847	6.23131	6.23349	6.0979	6.10266	coding	NM_014212_Exon2+	NM_014212	HOX cluster	1237	chr12	+	54368964	54370201	NM_014212,	TGCTGGGGCCTGGATTTTTGTAAATAAATTTCCCAAGCGTTTCTTTCCACCTGGAGGGAA
CUST_20_PI426249100	6.18122e-06	4.09116	up	17339.4	16602	16378.6	3125.61	3330.13	3294.29	3550.32	13.8555	13.8133	13.8331	11.7166	11.8453	11.8023	11.8415	coding	NM_014620_Exon4+	NM_014620	HOX cluster	1180	chr12	+	54448633	54449813	NM_153633,NM_014620,	ATTTTAGTGTCGATGTGAAATGCCCCGTGATCAATAATAAACCAGTGGATGTGAATTAGT
CUST_87_PI426249100	7.22518e-06	38.4309	up	18167.5	18644.7	18888.8	429.185	368.44	425.619	466.004	13.9195	13.9801	14.0448	8.74099	8.56189	8.75685	8.80941	coding	NM_018951_Exon2-	NM_018951	HOX cluster	1582	chr7	-	27210210	27211792	NM_153715,NM_018951,	GCTGTGCGTGGAAAAAGACGATGTTTATGTTCTTATAGAATAAAAGCTGTGGAATGAAGC
CUST_51_PI426249100	1.14728e-05	29.5516	up	1292.31	1284.08	1251.08	40.6097	40.3112	43.0978	54.2502	10.2095	10.2013	10.2161	5.17674	5.24109	5.32019	5.55727	coding	NM_021192_Exon2+	NM_021192	HOX cluster	680	chr2	+	176973634	176974314	NM_021192,	CTTCCTCTTCGGTGAATGCAGGTTATTTAAACTTTGGGAAATGTACTTTTAGTCTGTCAT
CUST_13_PI426249100	1.76142e-05	5.35001	up	105.56	104.938	109.09	26.0769	24.1472	24.6086	23.2177	6.82891	6.81662	6.90806	4.51139	4.4713	4.48086	4.26308	coding	NM_153693_Exon2+	NM_153693	HOX cluster	346	chr12	+	54422359	54422705	uc.343+,NM_153693,NM_004503,	AAACACCTTAGGACATAACACACAGACCTCAATCGCTCAGGATTTTAGTTCTGAGCAGGG
CUST_68_PI426249100	2.23795e-05	3.06812	down	449.597	425.663	426.438	1324.55	1173.47	1211.56	1281.92	8.79659	8.71329	8.7581	10.469	10.3206	10.3428	10.3609	coding	NM_006735_Exon2-	NM_006735	HOX cluster	1111	chr7	-	27139973	27141084	NM_006735,	CCTGAGAGCAGTATGAGGCCTGCAAGAAAGTGATCATATAATTGTATCTTCACTTTCTTT
CUST_77_PI426249100	2.36288e-05	7.44904	up	3983.36	3976.04	3629.9	479.876	476.419	457.982	446.297	11.7889	11.8005	11.7295	8.92326	8.966	8.87093	8.74361	coding	NM_002141_Exon2-	NM_002141	HOX cluster	1064	chr7	-	27168126	27169190	NM_002141,	GAACTGTACAAATTGTGATGTGGCTACATAGAAAGCCATGTGCTAAGAATAAACTCCATT
CUST_85_PI426249100	2.64494e-05	5.31631	up	1700.19	1726.22	1699.49	315.689	267.261	315.704	295.548	10.5796	10.6043	10.6497	8.27214	8.09578	8.31048	8.12476	coding	NM_152739_Exon2-	NM_152739	HOX cluster	1403	chr7	-	27202057	27203460	NM_152739,	CCTCAAGGCCTACTGACCAAATTGTTGTGTTGAGATGATATTTAACTTTTTGCCAAATAA
CUST_10_PI426249100	3.23268e-05	23.7543	up	7574.23	8229.13	7243.39	235.321	318.029	329.35	298.338	12.6951	12.8358	12.6883	7.82427	8.34907	8.36707	8.13816	coding	NM_022658_Exon2+	NM_022658	HOX cluster	1671	chr12	+	54404872	54406543	NM_022658,	CAGCCCTGTTCCTGGTCCAAGTACTTTGTATTGTATACGTGAGTCATAATAATAAAAAGA
ASHG19A3A008503	3.25626e-05	14.2669	down	328.271	382.11	272.095	4262.13	4326.32	4669.62	4184.46	8.36925	8.56821	8.14438	12.1772	12.2178	12.3063	12.0796	coding	NM_002145	HOXB2	RefSeq_coding	1614	chr17	-	46620020	46622393		GGAGACATTTCAAACTTCATCAATCAAGGAGTCGACATTAATTCCTCCTCCTCCTCCTTT	3212	Hs.514289	GO:0043565|GO:0003700|GO:0030528|GO:0009952|GO:0008015|GO:0009953|GO:0048704|GO:0021612|GO:0002011|GO:0007275|GO:0048857|GO:0006355|GO:0021569|GO:0021570|GO:0005634	NP_002136	Homeobox B2
ASHG19A3H0000577	3.35623e-05	19.5571	up	394.654	350.599	338.988	19.1133	22.4763	22.456	21.183	8.61574	8.44729	8.45025	4.0342	4.36724	4.34046	4.11732	coding	NM_002145_Exon1+	NM_002145	HOX cluster	511	chr17	+	46621882	46622393		AAAGGAGGAGGAGGAGGAATTAATGTCGACTCCTTGATTGATGAAGTTTGAAATGTCTCC
ASHG19A3A016629	3.91444e-05	28.448	up	1352.82	1293.77	1170.39	51.1891	48.0965	37.0805	47.4628	10.2719	10.2145	10.1273	5.53458	5.50845	5.09688	5.35738	coding	NM_021192	HOXD11	RefSeq_coding	1463	chr2	+	176972083	176974314		CTTCCTCTTCGGTGAATGCAGGTTATTTAAACTTTGGGAAATGTACTTTTAGTCTGTCAT	3237	Hs.421136	GO:0043565|GO:0003700|GO:0030528|GO:0009952|GO:0001658|GO:0060351|GO:0048589|GO:0009953|GO:0042733|GO:0001656|GO:0001759|GO:0007389|GO:0010720|GO:0032332|GO:0009954|GO:0006355|GO:0001501|GO:0006351|GO:0005634	NP_067015	Homeobox D11
CUST_44_PI426249100	6.05485e-05	424.062	up	9171.69	8323.78	7549.49	26.9901	19.2005	21.5606	14.7999	12.9732	12.8497	12.7508	4.56673	4.13539	4.27786	3.53909	coding	NM_006361_Exon2-	NM_006361	HOX cluster	2277	chr17	-	46802128	46804405	NM_006361,	GCTATCAGAAACTTAAACTTGAGGATTTTCTCTGTTTTTCACTCGCAATAAATTCAGAGC
CUST_41_PI426249100	7.31771e-05	9.46638	up	449.989	460.448	431.972	60.9418	51.827	47.1612	47.214	8.79869	8.81817	8.77471	5.79055	5.61822	5.45853	5.3502	coding	NM_024017_Exon2-	NM_024017	HOX cluster	1972	chr17	-	46698525	46700497	NM_024017,	TTTCTTTGGGGGTGATTGTCTCGCTTGTTTTCAGTTGTCGATTATATGGGAGGGTTCTGG
CUST_24_PI426249100	8.23323e-05	14.0008	down	290.9	420.587	279.188	4432.39	4386.66	4372.26	3927.22	8.19695	8.69884	8.18253	12.2353	12.2373	12.2142	11.9806	coding	NM_002145_Exon1-	NM_002145	HOX cluster	511	chr17	-	46621882	46622393	NM_002145,	GGAGACATTTCAAACTTCATCAATCAAGGAGTCGACATTAATTCCTCCTCCTCCTCCTTT
CUST_8_PI426249100	0.000123125	112.922	up	3654.8	3062.96	3004.37	45.0475	28.4243	23.8084	23.8903	11.6684	11.4298	11.4601	5.33748	4.72173	4.43294	4.30888	coding	NM_017409_Exon2+	NM_017409	HOX cluster	1108	chr12	+	54382952	54384060	NM_017409,	TCCCTGTCTGGGAGTTGTGTTATTTAAAGATATTCTGTATGTTGTATCTTTTGCATGTAG
CUST_33_PI426249100	0.00012886	7.05788	up	1592.85	1534.86	1537.66	257.414	177.339	207.271	202.619	10.4943	10.446	10.502	7.9648	7.46668	7.66899	7.54561	coding	NM_018952_Exon4-	NM_018952	HOX cluster	936	chr17	-	46673098	46674034	NM_018952,	ATTAATTTTCTATGTGTTGTGTTTGTAGTCTTGTCTTAGCTCTGGACGTGAAATACTTCG
ASHG19A3H0000640	0.000134151	4.37314	up	172.64	199.925	189.928	49.7636	44.4952	47.6203	55.884	7.49731	7.69182	7.66242	5.48932	5.39017	5.47167	5.60288	coding	NM_018951_Exon2+	NM_018951	HOX cluster	1582	chr7	+	27210210	27211792		GCTTCATTCCACAGCTTTTATTCTATAAGAACATAAACATCGTCTTTTTCCACGCACAGC
CUST_47_PI426247286	0.00014713	2.1718	down	620.607	578.249	591.16	1126.05	1145.58	1102.91	1378.37	9.22226	9.11477	9.19087	10.2223	10.2824	10.2084	10.4663	coding	NM_024014_intron2-	NM_024014	HOX cluster	1389	chr7	-	27185536	27186926		GAAAACATCTCGCTTGGTATGAAATAATCTCCCATTCAGTATGCTTTGGGCCCCAGACAT
CUST_31_PI426249100	0.000153124	20.7187	up	1350.99	1356.68	1207.77	77.124	68.1049	47.1391	64.5662	10.2705	10.2756	10.1672	6.14821	6.03407	5.45701	5.82033	coding	NM_002147_Exon2-	NM_002147	HOX cluster	1199	chr17	-	46668619	46669818	NM_002147,	TGATTCGCTTTTGGTATTTGTTTGTAGCTTTCCTGGAAGTCAAATAAATGTTTCCCCCAC
ASHG19A3H0000533	0.000263783	2.90725	down	151.685	186.449	165.493	511.601	453.752	505.888	548.334	7.31975	7.59724	7.47069	9.0246	8.88806	9.03008	9.06611	coding	NM_014621_intron1-	NM_014621	HOX cluster	540	chr2	-	177016794	177017335		TCCTCAAACACACCCACATACCCCAGGCTTGCGGGATCCCCAAATGTGCTCCTTCTTCTG
CUST_11_PI426249100	0.000264715	4.17688	up	2832.8	2761.99	2871.74	556.462	595.561	527.896	742.58	11.3109	11.2777	11.3961	9.1503	9.30144	9.08595	9.52557	coding	NM_153693_Exon1+	NM_153693	HOX cluster	557	chr12	+	54410641	54411198	NR_003084,NM_153693,NM_014620,	TTGAATTTATATAAAGTATATGTGTGTGTGTGTGGAGCTGAGACAGGCTCGGCAGCGGCA
CUST_16_PI426249100	0.000282717	72.1803	up	3879.37	3798.33	3662.84	30.596	58.9215	47.2425	85.5952	11.7525	11.73	11.7414	4.75433	5.81553	5.46081	6.24042	coding	NM_018953_Exon2+	NM_018953	HOX cluster	1081	chr12	+	54428061	54429142	NR_003084,NM_018953,	TGACTCTGGGTCCTTCCTGAAACTATATTTTGTCATATCAAATAAAGAGAGAACAGGACT
CUST_12_PI426249100	0.000325552	5.42374	up	108.29	110.317	104.274	23.361	29.6194	20.8689	24.5237	6.86475	6.88569	6.84344	4.34182	4.78142	4.22649	4.35165	coding	NM_004503_Exon1+	NM_004503	HOX cluster	512	chr12	+	54422193	54422705	uc.343+,NM_153693,NM_004503,	AAACACCTTAGGACATAACACACAGACCTCAATCGCTCAGGATTTTAGTTCTGAGCAGGG
CUST_57_PI426249100	0.000410235	2.02252	up	1806.47	1707.95	1576.16	797.966	679.236	722.324	760.18	10.6729	10.59	10.5387	9.69899	9.50876	9.56825	9.56153	coding	NM_019558_Exon2+	NM_019558	HOX cluster	682	chr2	+	176996044	176996726	NM_019558,	TCTGAGCTAGTGATTTGCCTCAACAACGTAAACTTCCTAATGATTAGCACTTAATAATTG
ASHG19A3H0000515	0.000491796	4.04547	down	9.31658	5.75222	5.40761	39.2437	35.4291	36.8315	40.5197	3.42401	2.94347	2.874	5.12846	5.05017	5.08812	5.12047	coding	NM_002146_intron3+	NM_002146	HOX cluster	2897	chr17	+	46629994	46632892		ACTGGGGCTCGAATCCATCTTAGGAACTGAAAAGGGAACTGACATCAATAGGGTTTTTTC
ASHG19A3H0000586	0.000529309	3.91705	up	70.7326	66.3053	60.5482	22.5267	21.8807	21.5677	19.4361	6.27882	6.18734	6.09327	4.28396	4.32576	4.27831	3.97881	coding	NM_018952_Exon4+	NM_018952	HOX cluster	936	chr17	+	46673098	46674034		CGAAGTATTTCACGTCCAGAGCTAAGACAAGACTACAAACACAACACATAGAAAATTAAT
CUST_70_PI426249100	0.000843555	4.65971	up	94.1442	102.911	103.971	26.4373	19.7395	29.2467	31.8331	6.67543	6.79203	6.84012	4.53432	4.17282	4.73839	4.75028	coding	NM_153631_Exon4-	NM_153631	HOX cluster	2530	chr7	-	27145809	27148339	NM_153632,NM_153631,NM_030661,	GGGAGGGGGAGAGAGCAAGGAGATCGGTATCTTTGTAATAAAACTGCAATTTTATAAATT
ASHG19A3H0000630	0.00114448	4.68455	up	119.922	97.7677	111.65	35.3466	22.954	31.2186	26.1234	7.00618	6.72397	6.94023	4.97019	4.39676	4.83869	4.44322	coding	NM_002141_Exon2+	NM_002141	HOX cluster	1064	chr7	+	27168126	27169190	uc003syl.2,	AATGGAGTTTATTCTTAGCACATGGCTTTCTATGTAGCCACATCACAATTTGTACAGTTC
ASHG19A3H0000559	0.00119112	9.38009	up	308.169	320.464	276.539	28.2224	49.7495	26.2966	47.0381	8.27917	8.32639	8.16817	4.63126	5.55774	4.57868	5.34555	coding	NM_014212_Exon2-	NM_014212	HOX cluster	1237	chr12	-	54368964	54370201		TTCCCTCCAGGTGGAAAGAAACGCTTGGGAAATTTATTTACAAAAATCCAGGCCCCAGCA
CUST_52_PI426249100	0.00186811	2.39631	up	45.0447	31.6911	49.6367	28.8851	21.799	19.5656	20.3263	5.63814	5.20015	5.82047	4.6691	4.32141	4.12789	4.05001	coding	NM_002148_Exon1+	NM_002148	HOX cluster	815	chr2	+	176981491	176982306	NM_002148,	TGGATATTTTAGACTGAGTCAGACCTACGCCACCGGGAAAACCCAAGAGTACAATAATAG
CUST_34_PI426249100	0.00200347	2.57639	up	44.8226	38.3475	46.3285	28.7934	18.1544	19.9729	20.8389	5.629	5.45547	5.72694	4.66392	4.04267	4.15817	4.08903	coding	NM_018952_Exon3-	NM_018952	HOX cluster	493	chr17	-	46675097	46675590	NM_018952,	AAGAGCAGAAGTGCTCCACTCCGGTCTACCCGTGGATGCAGCGGATGAATTCGTGCAACA
ASHG19A3A008514	0.00503378	6.72155	up	425.95	449.957	390.582	58.3217	44.751	55.0927	148.514	8.72406	8.79001	8.64792	5.7217	5.39983	5.68865	7.07729	coding	NM_024017	HOXB9	RefSeq_coding	2711	chr17	-	46698525	46703835		TTTCTTTGGGGGTGATTGTCTCGCTTGTTTTCAGTTGTCGATTATATGGGAGGGTTCTGG	3219	Hs.463350	GO:0005515|GO:0043565|GO:0003700|GO:0016563|GO:0009952|GO:0060070|GO:0060326|GO:0048706|GO:0030879|GO:0007275|GO:0045944|GO:0006355|GO:0006351|GO:0005739|GO:0005730|GO:0005634|GO:0005634	NP_076922	Homeobox B9
ASHG19A3H0000518	0.00715318	2.05752	down	123.127	138.385	127.217	277.424	229.722	405.438	274.939	7.04028	7.19531	7.11607	8.07699	7.85838	8.6841	8.01302	coding	NM_002147_intron2+	NM_002147	HOX cluster	663	chr17	+	46669818	46670482		GAAAGCTCCTTTTACTGTTCACCCCTTCTTTGCTAGCGACAGTCTCAAAATTTCAGGGGT
ASHG19A3H0000510	0.00736285	2.77847	down	5.51379	24.1613	14.4273	67.6503	48.992	54.1252	25.8645	2.80151	4.84471	4.11061	5.94493	5.53324	5.66402	4.43075	coding	NM_014620_intron2-	NM_014620	HOX cluster	639	chr12	-	54447060	54447700	uc.345-,	CTGGAGTGGAAAATAATTTTTCTCGCTTTGTCGTTTTTCTGCTCCATAAAGCCCTCCTAC
CUST_38_PI426249100	0.00781036	2.31687	up	111.838	141.009	109.453	41.7152	69.0349	67.4843	70.0215	6.90631	7.22069	6.91323	5.21829	6.05403	5.9923	5.94031	coding	NM_004502_Exon1-	NM_004502	HOX cluster	503	chr17	-	46687880	46688383	NM_004502,	TTTCTAAATATCCAGCCTCAAGTTCGGTTTTCGCTACCGGAGCCTTCCCAGAACAAACTT
CUST_67_PI426249100	0.00781566	2.43561	up	140.829	98.0263	78.2365	50.8522	48.9748	48.4229	52.4452	7.22243	6.72804	6.44779	5.52394	5.53285	5.4953	5.50845	coding	NM_153620_Exon1-	NM_153620	HOX cluster	448	chr7	-	27135177	27135625	NM_153620,NM_005522,	TATGGCTCACAGAACTTCAGTGCGCCTTACAGCCCCTACGCGTTAAATCAGGAAGCAGAC
ASHG19A3H0000602	0.00836313	3.55279	down	12.843	28.6666	24.5011	99.7078	85.9933	85.4908	98.2251	3.86491	5.06815	4.84139	6.52887	6.37595	6.33497	6.44196	coding	NM_021193_Exon2-	NM_021193	HOX cluster	239	chr2	-	176965249	176965488		TGAGGTTCAGCCTATTGGACAATTCCTTGCGTTTCTGCCTGTTGATGAATTCGTTGACGA
ASHG19A3H0000638	0.00962687	2.46831	up	33.7683	34.1747	24.1482	21.3119	13.0937	15.8443	16.7962	5.23552	5.30009	4.81928	4.19773	3.51721	3.79292	3.75123	coding	NM_152739_Exon2+	NM_152739	HOX cluster	1403	chr7	+	27202057	27203460		TTATTTGGCAAAAAGTTAAATATCATCTCAACACAACAATTTGGTCAGTAGGCCTTGAGG
ASHG19A3H0000590	0.00991525	2.20692	up	36.3832	47.3927	31.5552	24.9926	16.1562	21.501	28.0518	5.33923	5.74033	5.19375	4.4452	3.8598	4.27205	4.55257	coding	NM_004502_Exon2+	NM_004502	HOX cluster	855	chr17	+	46684602	46685457		AATTGCGTTTTATTTTTCCATCCTTTAGATACACACAGAATGTAAAAGGGAGCATGGGGC
CUST_3_PI426247286	0.0144776	4.24268	down	7.07093	5.00297	5	48.44	26.3395	26.4062	20.8741	3.06938	2.32205	2.39437	5.44266	4.60072	4.58548	4.0921	coding	NM_014212_intron1+	NM_014212	HOX cluster	1256	chr12	+	54367707	54368964		TTTTGAAAATGTTCAAACTATGTGTTCGCGGGTCCTCGAGCAGAAACCCAAGCAACTCTG
ASHG19A3H0000625	0.0170317	3.11905	down	41.7942	45.84	20.2857	142.955	128.612	103.663	138.7	5.52861	5.69413	4.58747	7.06442	6.9839	6.62473	6.97165	coding	NM_153632_Exon2+	NM_153632	HOX cluster	162	chr7	+	27149733	27149895		TGGAGCTGCTGGTTTTCTGCTTTGTGTTTTGTCGAGACTCTTTCATCCAGGGGAAGATTT
CUST_22_PI426247286	0.0181324	3.23953	down	32.7785	39.1211	15.3076	110.321	106.159	81.8237	139.416	5.19151	5.48119	4.20174	6.67617	6.69032	6.26989	6.97933	coding	NM_004502_intron2-	NM_004502	HOX cluster	2422	chr17	-	46685457	46687880		GGGAAAATGGGCTTCTTTGCCCATCGCCCATTGACTTCAAATCACATACACGGTATAAGA
CUST_69_PI426249100	0.0192337	2.89698	down	8.38957	23.9924	11.2544	73.0302	41.8064	48.5506	40.8154	3.27324	4.8357	3.78037	6.06182	5.2978	5.49988	5.1311	coding	NM_006735_Exon1-	NM_006735	HOX cluster	666	chr7	-	27141728	27142394	uc.212-,NM_006735,	GATACATTTCAAAGTTCATCAATCAAGACCTCGACGCTTTCACACTCGACACTGATTCCT
CUST_25_PI426247286	0.0194659	4.2567	up	40.7363	164.684	45.0559	21.5477	17.1987	20.5383	20.7019	5.49071	7.42968	5.68865	4.21422	3.95767	4.20258	4.07864	coding	NM_032391_intron2-	NM_032391	HOX cluster	417	chr17	-	46799261	46799679		CTTAATGTTTGTCTCCAATGGGATGGAGTCCTGGCATAAGCAAAATTAATATTGATAACG
CUST_30_PI426247286	0.0230354	2.88772	up	55.0149	39.4426	54.3303	47.9405	16.1	13.0174	23.2764	5.9177	5.49217	5.94312	5.42744	3.85383	3.46839	4.26795	coding	NM_002148_intron1+	NM_002148	HOX cluster	1374	chr2	+	176982306	176983681		CCTTCCAAGGCCCACTTCATGTGAGTAATGTTTAATACTAGCATTTTCCAAAGCGGCCTG
CUST_49_PI426247286	0.0435205	2.52844	up	133.566	86.1625	134.902	126.332	56.5115	36.0784	33.1039	7.14807	6.54307	7.19782	6.88178	5.75188	5.05614	4.80914	coding	NM_152739_intron2-	NM_152739	HOX cluster	1035	chr7	-	27203460	27204496		AAGTTTTACTGCGTGCAATTTTAAGTGACTGTCTGTGCGTCTGTCTGCCAGGGTTCCATT
CUST_88_PI426075208	1.60553e-07	6.25063	down	706.447	743.117	674.703	3894.7	3841.33	3996.8	4082.32	9.39067	9.46023	9.37936	12.0388	12.0542	12.0824	12.041	noncoding	nc-HOXB2-162+	nc-HOXB2-162	HOX cluster	178	chr17	+	46623286	46623464		TTAACTTAGAGCACTCTCAAAGTTCAGATCAGCGTTATGTGTGTGCATGAGTGTGGTGGG
ASHG19A3A009656	2.1151e-06	2.34802	up	1306.01	1388.3	1290.25	519.256	488.48	531.431	519.603	10.2256	10.305	10.26	9.04876	9.00504	9.0968	8.97778	noncoding	ENST00000489624	COX6B1P2	Ensembl	216	chr17	+	46791091	46791307		TTTGTATGTGAATGGTACCAGCCTGTGTACAAGTCCCTCATTCCCATATCCTGGATCTCA
ASHG19A3H0000202	3.62024e-06	11.6448	up	788.914	786.148	725.72	65.8366	61.8413	73.691	71.5998	9.53531	9.53157	9.47401	5.90338	5.88971	6.12425	5.9707	noncoding	nc-HOXD9-16-	nc-HOXD9-16	HOX cluster	558	chr2	+	176984428	176984986		ATTAAGAAAACCCACAAGTTGGAGGGAGGGGGACTTAAAAAGCACATTACAATGTATCTT
CUST_87_PI426075208	3.86497e-06	5.71539	down	207.563	191.807	188.436	1125.3	1023.57	1106.75	1171.58	7.74757	7.63452	7.65226	10.2197	10.1179	10.2145	10.2197	noncoding	nc-HOXB2-161+	nc-HOXB2-161	HOX cluster	418	chr17	+	46622846	46623264		ACAACAGTTAAATCTTGGGAAATGGACAGGAACTCCCAGGCAGACACATAGGAGTGAGAT
ASHG19A3H0000122	7.51583e-06	2.70271	down	22364.4	23795.4	23595.5	47787.3	49076.6	46490.9	48905.8	14.2041	14.3204	14.3469	15.7569	15.7616	15.6975	15.6834	noncoding	nc-HOXC13-102-	nc-HOXC13-102	HOX cluster	108	chr12	+	54332232	54332340		CCCTACACCCCTTTGCGTCGGCCAAATTCAGCCTCCCCCCCCTCCCTCTCCCTCCCTGGG
ASHG19A3A014668	1.17497e-05	12.1999	up	2114.26	2050.29	1940.48	164.07	157.307	141.088	184.28	10.9025	10.872	10.837	7.27556	7.2866	7.08652	7.39812	noncoding	uc002ukq.2	BC034000	UCSC_knowngene	690	chr2	-	176999570	177001826		GACACAAGAAGCTTGGATGTGAAATAGCACTTCCTTCTGTGTTACAGAATAAAACAATAT
ASHG19A3H0000077	1.80655e-05	87.5489	up	1487.58	1296.48	1187.59	16.2645	18.2264	13.2784	18.2545	10.3998	10.2171	10.1489	3.77829	4.04938	3.50159	3.88369	noncoding	nc-HOXB9-206-	nc-HOXB9-206	HOX cluster	691	chr17	-	46803175	46803866		GCTGCCATGATCGTTAGCCTCATATTTTCTATCTAGAGCTCTGTAGAGCACTTTAGAAAC
CUST_177_PI426075208	2.09099e-05	3.71911	up	6968.58	7218.2	6090.6	1416	1390.91	1540.32	1755.13	12.5761	12.6442	12.4531	10.5679	10.58	10.6902	10.8134	noncoding	nc-HOXD1-48+	nc-HOXD1-48	HOX cluster	138	chr2	-	177046473	177046611		AGAGACACTTTTTACTAGCATAATTTATATATATGTGTGTGTGTGTGTGTACTCCACAGG
CUST_157_PI426075208	2.46945e-05	2.67158	down	16.9691	8.57849	9.97775	40.2944	36.9905	35.396	57.9763	4.2463	3.60619	3.61571	5.16513	5.11287	5.02505	5.65864	noncoding	nc-HOXC9-131+	nc-HOXC9-131	HOX cluster	198	chr12	-	54384395	54384593		TTAAGTTTATTCCTTTCCTTGGATGGGTGGGGGGCTCTTGGGGTGACCCCCAGCAGCAGT
ASHG19A3H0000157	4.62731e-05	58.8089	down	656.016	649.907	686.723	25028.3	35489.6	36995.1	39524	9.29454	9.27409	9.40077	14.794	15.285	15.3513	15.3741	noncoding	nc-HOXC9-131-	nc-HOXC9-131	HOX cluster	198	chr12	+	54384395	54384593		ACTGCTGCTGGGGGTCACCCCAAGAGCCCCCCACCCATCCAAGGAAAGGAATAAACTTAA
CUST_187_PI426075208	5.36551e-05	5.61019	up	155.847	148.249	141.658	31.2363	33.9837	29.3661	31.6331	7.35783	7.28561	7.26512	4.78504	4.9855	4.7464	4.74229	noncoding	nc-HOXD4-22+	nc-HOXD4-22	HOX cluster	706	chr2	-	176996730	176997436		TACGCAAAGAAACCTTTTAGGAGTAAACAAAACGCACCCGAACTATTCATTATAAAGGAA
CUST_187_PI426075208	5.36551e-05	5.61019	up	155.847	148.249	141.658	31.2363	33.9837	29.3661	31.6331	7.35783	7.28561	7.26512	4.78504	4.9855	4.7464	4.74229	noncoding	nc-HOXD4-22+	nc-HOXD4-22	HOX cluster	706	chr2	-	176996730	176997436		TACGCAAAGAAACCTTTTAGGAGTAAACAAAACGCACCCGAACTATTCATTATAAAGGAA
CUST_187_PI426075208	5.36551e-05	5.61019	up	155.847	148.249	141.658	31.2363	33.9837	29.3661	31.6331	7.35783	7.28561	7.26512	4.78504	4.9855	4.7464	4.74229	noncoding	nc-HOXD4-22+	nc-HOXD4-22	HOX cluster	706	chr2	-	176996730	176997436		TACGCAAAGAAACCTTTTAGGAGTAAACAAAACGCACCCGAACTATTCATTATAAAGGAA
ASHG19A3A047643	5.83913e-05	5.38015	up	4678.81	4203.86	3980.25	730.026	713.952	620.602	738.738	12.0303	11.8874	11.8561	9.55935	9.57881	9.3325	9.51718	noncoding	NR_003716	HOTAIR	RefSeq_NR	2337	chr12	-	54356097	54362515		CCTTGTGTAGGTTGTGTGTGTGTGGTGGTTTTATGCATAAATAAAGTTTTACATGTGGTG
ASHG19A3H0000169	8.4106e-05	16.1361	up	282.22	263.735	245.181	23.0421	16.8111	19.9768	17.7454	8.1527	8.06161	7.9986	4.31884	3.92071	4.15843	3.83704	noncoding	nc-HOXD10-7-	nc-HOXD10-7	HOX cluster	388	chr2	+	176974318	176974706		GGTTTCTAGTAAAATGGAGGTTACAGCTTCAATACACTGTATGAATTCTCCTCTTTGAGG
CUST_44_PI426075208	9.43685e-05	2.59149	down	136.951	137.469	139.876	417.157	346.686	377.978	398.01	7.18498	7.18522	7.24729	8.70117	8.47585	8.57356	8.56787	noncoding	nc-HOXB2-164+	nc-HOXB2-164	HOX cluster	1039	chr17	+	46626206	46627245		TGGGAAAGTTGGAAGGGAACGTGTTTTGTGCCTTTTGGGTTTGAAATGTGTTTTCTTATT
ASHG19A3H0000063	0.000126159	2.07897	down	103.895	112.277	104.703	263	240.675	235.053	248.508	6.81145	6.91023	6.84909	7.99767	7.93166	7.86294	7.85891	noncoding	nc-HOXB9-186-	nc-HOXB9-186	HOX cluster	168	chr17	-	46715352	46715520		TGCACATATTCACACACACACTCACACACAGGAATGCTGACACATACAGACCCGACTTTA
ASHG19A3H0000064	0.00013615	2.38072	down	4566.41	4929.52	5085.11	9886.17	8786.71	10049.3	9238.53	11.9937	12.1141	12.1957	13.428	13.2905	13.4409	13.2509	noncoding	nc-HOXB9-187-	nc-HOXB9-187	HOX cluster	168	chr17	-	46715907	46716075		TGGCTCTCTGTGAACAAAGCAGGTTTCCTCCTTGCCACTCACCCCCACCCCCCATACCAC
ASHG19A3A008508	0.000263904	24.6013	up	394.698	361.016	326.304	24.7551	13.9077	16.9436	15.1878	8.61624	8.49464	8.39892	4.43038	3.61676	3.8994	3.58387	noncoding	AK000839		misc_RNA	1951	chr17	-	46657698	46659621		ATATCTAGATATTCGTTTGATCACAAACTAAAGGCTTGGAGGGGCACGGAGGAGCCGATT
ASHG19A3H0000043	0.000269772	2.04745	down	323.093	314.015	332.138	629.85	625.008	641.765	714.728	8.3479	8.30033	8.42406	9.33313	9.37966	9.38102	9.47121	noncoding	nc-HOXB2-160-	nc-HOXB2-160	HOX cluster	310	chr17	-	46622394	46622704		GGGGCTCATGGTGTCCTGGTCGTGGTCCTCTGGTGTTTTTGAATCAATTAAACCAAATAA
CUST_182_PI426075208	0.000271907	2.327	down	2089.72	2013.12	2102.19	4501	4012.74	4117.29	3777.44	10.8881	10.84	10.947	12.2557	12.1249	12.1261	11.9339	noncoding	nc-HOXD3-41+	nc-HOXD3-41	HOX cluster	128	chr2	-	177025459	177025587		GAGCGGCAGCCACCCGCGCCCCCACCCACTCCTGGGTTTCTGCCCAGCCCTCCCAGGCCC
ASHG19A3H0000213	0.000280049	2.20758	down	36.7277	36.9585	44.8504	108.901	113.191	104.904	95.5451	5.35129	5.40672	5.68291	6.65827	6.78886	6.64287	6.40109	noncoding	nc-HOXD8-21-	nc-HOXD8-21	HOX cluster	348	chr2	+	176993168	176993516		CGAGCAGGAGAGGGGAAAACACACACACACAACAGAGAACCATTGCATTTATTGGACATT
CUST_69_PI426075208	0.000307136	2.55357	down	256.027	258.502	283.549	684.92	630.768	642.516	746.279	8.02764	8.0344	8.20488	9.45935	9.39185	9.38241	9.53235	noncoding	nc-HOXB9-196+	nc-HOXB9-196	HOX cluster	208	chr17	+	46782504	46782712		AGAGACAGAAATCAAATCTAGGGTGTTCATCTAGAGTCTCCTGCTCCTCCATTCCTGCTT
CUST_26_PI426075208	0.000327643	2.54037	down	22.2792	25.406	25.2935	86.9915	75.6824	69.6447	75.9243	4.64136	4.90644	4.88724	6.33163	6.18904	6.04313	6.06306	noncoding	nc-HOXA4-64+	nc-HOXA4-64	HOX cluster	138	chr7	+	27178897	27179035		CCTTGGTCCTCAGGGTCCAGTGGGCGCTAGCAGCCCAGGATCCACCTTGCAACCCGGGGG
ASHG19A3H0000023	0.000329745	4.51421	up	166.447	151.537	156.644	39.1685	38.3782	47.7678	39.6532	7.45069	7.31553	7.3975	5.12498	5.16973	5.47538	5.08365	noncoding	nc-HOXA4-61-	nc-HOXA4-61	HOX cluster	158	chr7	-	27170427	27170585		GGGGCGCTGCACGTGGGGCACGGGGCGGGGCGCGCGCTGGGCTGGGGAGGAGCGGCTCGA
ASHG19A3H0000107	0.000364035	10.2166	down	1489.11	1402.74	1370.18	8279.42	13360.1	13805.3	14131.5	10.4017	10.321	10.3471	13.1535	13.9045	13.9101	13.8696	noncoding	nc-HOXC10-128-	nc-HOXC10-128	HOX cluster	158	chr12	+	54378343	54378501		CCACAAACCTCACCCCACTCCCATCCCCAAGGTAAGAAGTGGGAGTCGGGTCCGGGGATA
ASHG19A3H0000031	0.000403897	2.40686	down	203.765	213.391	191.094	429.341	507.305	546.359	533.895	7.72651	7.78101	7.67088	8.74173	9.06824	9.13974	9.02342	noncoding	nc-HOXA6-71-	nc-HOXA6-71	HOX cluster	218	chr7	-	27192547	27192765		GCATGCGCCCTGAACCCAGCCCCAGGCTAGGAAATGGGATTTAAGGTCCCCACCCCGCCT
ASHG19A3H0000008	0.000492943	3.10667	down	235.128	202.561	267.359	776.212	654.151	664.112	813.927	7.91751	7.71094	8.1183	9.65506	9.44978	9.4355	9.66345	noncoding	nc-HOXA11-90-	nc-HOXA11-90	HOX cluster	168	chr7	-	27231227	27231395		CTTTGGTGAGACCCTTGATGCTCTTCTCCTGCCTAAAATCCACACAGATGTGAGGCGCAC
ASHG19A3H0000100	0.000552386	2.81607	up	2011.24	1835.39	1839.64	719.453	584.914	516.048	610.767	10.8334	10.7023	10.7648	9.53675	9.27567	9.05457	9.22564	noncoding	nc-HOXC10-121-	nc-HOXC10-121	HOX cluster	248	chr12	+	54373384	54373632		CGCACCCCTCCAACCCACTGCACAAAGCAAAGACCCATAACCTTGACTCAGACTGCTGAT
ASHG19A3A016637	0.000604682	2.84771	up	932.131	810.511	724.428	281.515	270.66	286.421	272.667	9.76426	9.57744	9.47121	8.097	8.11571	8.16458	8.00072	noncoding	ENST00000426615	AC009336.24	Ensembl	658	chr2	+	177042908	177043737		GAAGTAGGCTAAGACTGCTGTTGAACTTGAAGCTAAACTTGAATGCCATTTAAAATAACA
ASHG19A3A047647	0.000730312	31.1496	up	384.524	356.891	344.166	22.1187	7.05075	16.5325	13.6257	8.586	8.4749	8.47277	4.25727	2.67701	3.86409	3.40195	noncoding	ENST00000505700	AC012531.17	Ensembl	548	chr12	-	54392805	54393794		CCTCGGTCGTGGGCAAGTAGCTTGTTTTTACGTCCCTCAATAAAATTTTTATGAGGATCA
CUST_113_PI426075208	0.000796663	2.17834	down	425.921	470.479	442.644	956.334	856.282	845.481	1038.36	8.72398	8.84577	8.80794	9.98079	9.84905	9.79329	10.04	noncoding	nc-HOXC11-111+	nc-HOXC11-111	HOX cluster	698	chr12	-	54360504	54361202		TTATTTTCCTCTCCTTCTTTCTCTCTGTTCATCCCCAGTGCTACCCTGGAGGAAAAGGAT
CUST_204_PI426075208	0.000902456	2.49347	down	29.9259	20.2748	21.7391	69.4564	74.0806	74.8271	79.9844	5.06633	4.62359	4.67823	5.98799	6.15548	6.14372	6.14295	noncoding	nc-HOXD9-18+	nc-HOXD9-18	HOX cluster	178	chr2	-	176986908	176987086		CCACACACACGCTTGCTCACAGCTTGTCGTGTTGTTTAAAACAGGTGGAAGACCTCTGTA
ASHG19A3H0000177	0.000914122	2.08463	down	85.0687	72.8238	68.7366	172.209	189.784	170.887	189.219	6.53333	6.31583	6.2678	7.34848	7.56695	7.37712	7.43587	noncoding	nc-HOXD1-48-	nc-HOXD1-48	HOX cluster	138	chr2	+	177046473	177046611		CCTGTGGAGTACACACACACACACACATATATATAAATTATGCTAGTAAAAAGTGTCTCT
ASHG19A3H0000076	0.000963033	31.6754	up	1414.88	1303.63	1363.21	70.8779	32.3391	61.1191	26.7006	10.3285	10.2239	10.3402	6.01813	4.91219	5.84121	4.47743	noncoding	nc-HOXB9-205-	nc-HOXB9-205	HOX cluster	838	chr17	-	46802225	46803063		AGGAAGATGAGGTCGATTTCCTGATTTAAAAAATCGTCCAAGCCCCGTGGTCCAGCTTAA
ASHG19A3H0000080	0.00112022	5.27452	up	1266.43	1199.04	1126.94	148.12	231.23	236.239	279.047	10.1763	10.1105	10.0767	7.11623	7.86821	7.86869	8.03539	noncoding	nc-HOXA13-96-	nc-HOXA13-96	HOX cluster	318	chr7	-	27240358	27240676		TCAGTGTACACTGTGTGTGTGTGTGATGAGTCGTTCTGAGTCTATGGGTCTAAATGCAAA
ASHG19A3A014670	0.00124866	2.51617	up	183.165	171.267	165.902	80.8591	88.6509	71.014	73.2889	7.57757	7.48203	7.47489	6.22228	6.41998	6.07249	6.00631	noncoding	ENST00000417086	AC009336.23	Ensembl	984	chr2	-	177040721	177053268		CGACCGGGGGCTGCCTGGGCAAGGGCGGGGCGAGAGGGCAGAACGCCTGCTCTCGGACAG
CUST_24_PI426075208	0.00150195	2.16888	up	127.43	115.33	118.663	61.918	74.4985	61.6956	62.1572	7.08308	6.94401	7.02047	5.81472	6.16419	5.85484	5.76187	noncoding	nc-HOXA4-62+	nc-HOXA4-62	HOX cluster	148	chr7	+	27171207	27171355		AAGCAACACCTCCACAGAACCGAGCTTTGAAAACAATAACTTCCTATTTCAGAACTATCC
ASHG19A3A032595	0.00185472	3.21714	down	41.6916	37.2896	46.6157	137.424	158.026	145.81	202.547	5.52471	5.41906	5.73373	7.00295	7.2942	7.13758	7.54505	noncoding	HIT000098379		H-invDB	227	chr7	-	27235768	27235994		ACCTCCTTGACTTTAGAGATTCAGTACTCAATTATTTGGCTCCAGCTGGAGCAAATTTGA
CUST_35_PI426075208	0.00195897	2.56473	down	51.4978	40.2024	48.8606	152.399	141.306	148.512	127.448	5.82358	5.5162	5.79961	7.15957	7.12482	7.16583	6.83753	noncoding	nc-HOXA7-75+	nc-HOXA7-75	HOX cluster	108	chr7	+	27200477	27200585		GGGTCAGGGAGGCGCGAGCGGTGAGGGTCGGGCAAGCCCCCGCCGATTCCTTGTTTCCCA
ASHG19A3A034091	0.00200616	3.11543	up	81.53	81.7222	77.6989	32.372	25.8451	26.6109	45.227	6.47707	6.47224	6.43819	4.83799	4.57209	4.59788	5.28431	noncoding	NR_002795	HOXA11AS	RefSeq_NR	1628	chr7	+	27225026	27228912		ATTTGCACGGTGACTTGATTACACTCTCTCATTCATGGTCACTTCCGAAGCGCTTTAGTG
ASHG19A3H0000085	0.0025761	3.86631	up	96.6467	93.7497	86.4995	37.4035	27.728	19.9638	35.7736	6.71191	6.66623	6.59226	5.05337	4.6813	4.15654	4.93216	noncoding	nc-HOXA5-68-	nc-HOXA5-68	HOX cluster	648	chr7	-	27183537	27184185		CCGGACCCTGTGATGAAGATTTTCCAGGCTGGATACGTAAGCAAATCAAATCGCAAACTA
ASHG19A3H0000083	0.00370959	2.79965	down	16.3621	18.5562	12.2334	66.4246	48.7519	53.1733	57.7701	4.19501	4.51455	3.88655	5.91744	5.52708	5.63768	5.65361	noncoding	nc-HOXA1-55-	nc-HOXA1-55	HOX cluster	328	chr7	-	27136777	27137105		AACCTAATAGTAAACAACAATTTAACGACCTCAGCAGCCTCAGGGAAGTAGGGTGATGAG
ASHG19A3H0000102	0.00373675	2.92363	up	245.226	233.012	154.669	92.0772	64.3685	79.6156	83.9629	7.96816	7.89954	7.38321	6.41657	5.94909	6.23088	6.21362	noncoding	nc-HOXC10-123-	nc-HOXC10-123	HOX cluster	148	chr12	+	54374923	54375071		GTAGCATCTGTGTGCAAGTGTGTGCAATGTCAAGACGTGAGAGATTCTGCTGGCCGAGCT
ASHG19A3H0000205	0.00386305	2.84196	up	14014.1	16568.1	12791.9	2726.68	4782.53	4805.11	4571.33	13.5487	13.8065	13.4944	11.5153	12.3686	12.3487	12.2059	noncoding	nc-HOXC10-129-	nc-HOXC10-129	HOX cluster	260	chr12	+	54378513	54378773		CTCCACCCCTCTACCTCCCCTGCCGCCCGGGGGGCGCTTCCTTTGTTCGCGGGGAAGGGC
CUST_16_PI426075208	0.00447807	2.77692	down	86.9643	75.5331	84.337	313.936	289.026	157.996	298.317	6.56227	6.36603	6.55816	8.26371	8.20949	7.26478	8.13789	noncoding	nc-HOXA13-98+	nc-HOXA13-98	HOX cluster	208	chr7	+	27241728	27241936		TTTTTAAAATTCTCGCCTCTGACTCTGTTCGGCTGCCCAGAATTTTTTGGTGCCTTCGTG
ASHG19A3H0000105	0.00450059	2.20271	up	221.634	209.228	199.846	79.8042	117.738	101.722	132.073	7.83664	7.75559	7.73033	6.20238	6.84878	6.59567	6.89279	noncoding	nc-HOXC10-126-	nc-HOXC10-126	HOX cluster	228	chr12	+	54377223	54377451		ATAACCCCCATGCTGAGGCCACGGTGACCCTGCATATGAAAACACAAAACCATTTCAAAT
CUST_63_PI426075208	0.00486126	2.34187	up	1238.8	1084.01	995.531	532.905	431.68	398.081	396.173	10.1396	9.96364	9.90922	9.08626	8.80529	8.65381	8.56064	noncoding	nc-HOXB9-186+	nc-HOXB9-186	HOX cluster	168	chr17	+	46715352	46715520		TAAAGTCGGGTCTGTATGTGTCAGCATTCCTGTGTGTGAGTGTGTGTGTGAATATGTGCA
ASHG19A3A014666	0.00499808	2.93499	down	14.6374	14.3825	16.0907	48.2525	50.0039	83.0706	56.2623	4.04711	4.19969	4.27154	5.4355	5.56618	6.29006	5.61281	noncoding	ENST00000440016	AC009336.21	Ensembl	582	chr2	-	176987087	177001741		TCGCTGACTCTCCAGCTTCCGAGCCGCGGGCGGCGAGTCCAGGGCACACGGAGCGGCCGC
ASHG19A3A014666	0.00499808	2.93499	down	14.6374	14.3825	16.0907	48.2525	50.0039	83.0706	56.2623	4.04711	4.19969	4.27154	5.4355	5.56618	6.29006	5.61281	noncoding	ENST00000440016	AC009336.21	Ensembl	582	chr2	-	176987087	177001741		TCGCTGACTCTCCAGCTTCCGAGCCGCGGGCGGCGAGTCCAGGGCACACGGAGCGGCCGC
ASHG19A3A014666	0.00499808	2.93499	down	14.6374	14.3825	16.0907	48.2525	50.0039	83.0706	56.2623	4.04711	4.19969	4.27154	5.4355	5.56618	6.29006	5.61281	noncoding	ENST00000440016	AC009336.21	Ensembl	582	chr2	-	176987087	177001741		TCGCTGACTCTCCAGCTTCCGAGCCGCGGGCGGCGAGTCCAGGGCACACGGAGCGGCCGC
ASHG19A3A014666	0.00499808	2.93499	down	14.6374	14.3825	16.0907	48.2525	50.0039	83.0706	56.2623	4.04711	4.19969	4.27154	5.4355	5.56618	6.29006	5.61281	noncoding	ENST00000440016	AC009336.21	Ensembl	582	chr2	-	176987087	177001741		TCGCTGACTCTCCAGCTTCCGAGCCGCGGGCGGCGAGTCCAGGGCACACGGAGCGGCCGC
CUST_78_PI426075208	0.00525622	3.57663	up	77.7159	86.4923	113.119	25.5084	30.0134	29.7991	41.4268	6.41334	6.5482	6.95482	4.47717	4.80042	4.76896	5.15419	noncoding	nc-HOXA11-84+	nc-HOXA11-84	HOX cluster	708	chr7	+	27225087	27225795		ATTTGCACGGTGACTTGATTACACTCTCTCATTCATGGTCACTTCCGAAGCGCTTTAGTG
ASHG19A3H0000170	0.00560622	19.6248	up	78.83	433.196	79.1973	16.2621	5	11.2422	5	6.43538	8.73714	6.46787	3.77805	2.33128	3.23769	2.32841	noncoding	nc-HOXD10-8-	nc-HOXD10-8	HOX cluster	1788	chr2	+	176974818	176976606		CCTCTCACGGCATTTATCGCTTCAAGTTAAAGAATGTGGTGAGGGCTCTACTGCACTTTA
ASHG19A3H0000197	0.00820177	2.78596	down	11.3378	5.85493	8.28931	36.5839	35.8626	31.5427	26.5043	3.68892	3.06553	3.36349	5.01958	5.06689	4.85157	4.46525	noncoding	nc-HOXD4-34-	nc-HOXD4-34	HOX cluster	158	chr2	+	177012419	177012577		GTACTGATCGCGGGGAAGTGGTGGGCTAAGGGGCCAAGCCAGCGGAGTGGGCGGATAGAA
CUST_4_PI426075208	0.00963966	41.479	up	869.719	835.671	878.646	25.9353	14.8879	104.673	5.00918	9.66536	9.62321	9.74016	4.50356	3.72861	6.63894	2.33662	noncoding	nc-HOXA11-86+	nc-HOXA11-86	HOX cluster	128	chr7	+	27228787	27228915		CGCTTCTTTCCACAGCCTTTGCAGGCGGAATATCGGAATAAAGTGGGTCCAGGCGCCTCT
ASHG19A3H0000139	0.0101087	2.05351	down	18.7497	29.3946	19.5512	72.6096	47.7996	56.9576	54.7783	4.3944	5.10035	4.53706	6.05175	5.49919	5.73777	5.57274	noncoding	nc-HOXC6-245-	nc-HOXC6-245	HOX cluster	218	chr12	+	54416621	54416839		TTCTTCCTCATGTGACATCCTCTTGAGGCCCTATTCTGGGGGCTGAAAATATTCTGGATA
ASHG19A3H0000139	0.0101087	2.05351	down	18.7497	29.3946	19.5512	72.6096	47.7996	56.9576	54.7783	4.3944	5.10035	4.53706	6.05175	5.49919	5.73777	5.57274	noncoding	nc-HOXC6-245-	nc-HOXC6-245	HOX cluster	218	chr12	+	54416621	54416839		TTCTTCCTCATGTGACATCCTCTTGAGGCCCTATTCTGGGGGCTGAAAATATTCTGGATA
ASHG19A3H0000191	0.0107172	2.27688	down	124.357	99.4477	112.839	244.906	363.604	182.014	383.904	7.05304	6.74585	6.95236	7.88592	8.54213	7.47329	8.51522	noncoding	nc-HOXD4-28-	nc-HOXD4-28	HOX cluster	248	chr2	+	177005928	177006176		CAGCGACACCTTACTTAAATAATGCTCTGACCCAATCCCACTGATCCTCCGTTATCTCTT
CUST_95_PI426075208	0.0121477	4.32924	up	6736.27	6774.72	6750.45	617.89	1618.77	1770.45	1749.33	12.5351	12.5617	12.59	9.3036	10.7897	10.8906	10.8088	noncoding	nc-HOXB9-199+	nc-HOXB9-199	HOX cluster	188	chr17	+	46791012	46791200		GGAACTGCTTGCAGGACTACCTGGACTTCCACCTCTGTGAGAAGGCAGTGATTGCTAAAG
CUST_124_PI426075208	0.0144256	2.95736	down	31.6317	53.134	23.3073	137.628	122.169	107.565	118.703	5.13966	5.88766	4.77229	7.00511	6.90263	6.67924	6.73641	noncoding	nc-HOXC4-153+	nc-HOXC4-153	HOX cluster	519	chr12	-	54408220	54408739		TAGCAATCATAATTCCACGTTTAAAAACGAAACGGGACCTCAGCCATCCCTCGGAGTATG
CUST_15_PI426075208	0.0151366	3.1905	down	276.646	236.804	287.31	618.511	1247.21	494.493	1273.84	8.12447	7.92012	8.22367	9.30487	10.4054	8.9904	10.3521	noncoding	nc-HOXA13-97+	nc-HOXA13-97	HOX cluster	348	chr7	+	27241198	27241546		TTTAGCAGTTCTGGGTAAATATTGATTTGCCCCCAGTTTACCTTCTCCCTGACTGGCCAT
ASHG19A3H0000129	0.0164451	2.26076	down	142.338	130.064	162.042	326.067	288.456	292.783	537.423	7.23629	7.11112	7.44385	8.32078	8.20742	8.2004	9.03365	noncoding	nc-HOXC5-255-	nc-HOXC5-255	HOX cluster	468	chr12	+	54425701	54426169		ATAACGGGCCTTTTCCTCTGCCATGCTCACGTAATATTTGTGGAGGCTTCAATCTTGCTT
ASHG19A3H0000181	0.0169802	2.73803	up	37.3519	17.6637	27.1014	15.355	11.3051	15.3423	12.2897	5.37423	4.45192	4.98691	3.68863	3.28004	3.73726	3.23225	noncoding	nc-HOXD3-39-	nc-HOXD3-39	HOX cluster	2228	chr2	+	177018599	177020827		TGGGGAAAGAAAACAAAACCTCTATGCACTGGGTCATTAGATAATGACTGAATTTTCTGT
CUST_183_PI426075208	0.0181934	3.10603	down	188.181	175.422	160.175	269.181	661.695	723.805	756.058	7.62031	7.5157	7.42618	8.02999	9.46834	9.5721	9.55275	noncoding	nc-HOXD3-42+	nc-HOXD3-42	HOX cluster	178	chr2	-	177026009	177026187		TTTTCAGCCCATTCTCCTAAGTGCACATTTAGCCCCCAAATATTTCCTCCAGCACTCAAT
CUST_33_PI426075208	0.0192083	2.5695	up	26565.3	23533.9	22481.3	4251.05	6807.95	11108.6	9450.34	14.4461	14.3063	14.2884	12.1728	12.8992	13.592	13.2777	noncoding	nc-HOXA7-73+	nc-HOXA7-73	HOX cluster	148	chr7	+	27196467	27196615		GCCCCCCCGCCGACTCCTGCTAGTGAGCCCTGGACCAAGCTTGGGATCCTCCCCATCCCT
ASHG19A3H0000017	0.0268528	2.00168	up	51.2429	43.9049	51.9295	21.834	30.8987	26.8654	49.1829	5.8162	5.63329	5.88117	4.23497	4.84703	4.61263	5.40804	noncoding	nc-HOXA13-99-	nc-HOXA13-99	HOX cluster	148	chr7	-	27242338	27242486		AAAAAGTCCAGATAAATTTGATCAATAAGGTGCACCATAAATCTCAAGAATTCAGTCCCC
ASHG19A3H0000141	0.0317327	2.02173	down	66.5056	55.4514	62.9861	171.024	155.18	77.2728	216.466	6.18693	5.94528	6.14803	7.33932	7.26512	6.18945	7.64212	noncoding	nc-HOXC6-247-	nc-HOXC6-247	HOX cluster	138	chr12	+	54417941	54418079		CAGTGGCACAAAAGGGGCCAGCGGGGCAACCGTTCTTCTCTTGCTCAGAAAAGTGAGACT
ASHG19A3H0000141	0.0317327	2.02173	down	66.5056	55.4514	62.9861	171.024	155.18	77.2728	216.466	6.18693	5.94528	6.14803	7.33932	7.26512	6.18945	7.64212	noncoding	nc-HOXC6-247-	nc-HOXC6-247	HOX cluster	138	chr12	+	54417941	54418079		CAGTGGCACAAAAGGGGCCAGCGGGGCAACCGTTCTTCTCTTGCTCAGAAAAGTGAGACT
ASHG19A3H0000172	0.0426183	2.99587	up	43.4256	44.0789	46.7058	12.4925	47.764	16.5562	15.0121	5.58577	5.63775	5.7358	3.35223	5.49821	3.86611	3.56396	noncoding	nc-HOXD11-4-	nc-HOXD11-4	HOX cluster	488	chr2	+	176968082	176968570		AGGAAAGCATATGAACTCAGATCCAGGCCTTAAGACAGAAAACACGGAGGCCGTTTCTTT

## Sheet:  M1 vs T4
# Condition pairs: M1 vs T4 # Fold Change cut-off: 2.0 This table contains profiling data of all probes in the four HOX loci, targeting 407 discrete transcribed regions (Rinn, Kertesz et al. 2007), LncRNAs and coding transcripts. # Column A: ProbeName, it represents the probe name. # Column B: Fold change, positive value indicates up-regulation and negative value indicates down-regulation. # Colu…
	Fold Change and Regulation				Raw Intensities		Normalized Intensities		Annotations
ProbeName	Fold change([M1] vs [T4])	Log Fold change([M1] vs [T4])	Absolute Fold change([M1] vs [T4])	Regulation([M1] vs [T4])	[M1](raw)	[T4](raw)	[M1](normalized)	[4](normalized)	type	seqname	GeneSymbol	source	RNAlength	chrom	strand	txStart	txEnd	Xhyb	probeSeq	EntrezID	unigene	GO	ProteinAccession	product
ASHG19A3A008520	229.142	7.8401	229.142	up	8282.37	37.0429	12.8239	4.98379	coding	NM_006361	HOXB13	RefSeq_coding	3047	chr17	-	46802128	46806111		GCTATCAGAAACTTAAACTTGAGGATTTTCTCTGTTTTTCACTCGCAATAAATTCAGAGC	10481	Hs.66731	GO:0043565|GO:0003700|GO:0030528|GO:0001525|GO:0008544|GO:0060743|GO:0002009|GO:0007275|GO:0060527|GO:0040008|GO:0006355|GO:0009611|GO:0005634|GO:0005667	NP_006352	Homeobox B13
CUST_24_PI426249100	-13.7723	-3.7837	13.7723	down	290.9	3927.22	8.19695	11.9806	coding	NM_002145_Exon1-	NM_002145	HOX cluster	511	chr17	-	46621882	46622393	NM_002145,	GGAGACATTTCAAACTTCATCAATCAAGGAGTCGACATTAATTCCTCCTCCTCCTCCTTT
ASHG19A3A008503	-13.0895	-3.71033	13.0895	down	328.271	4184.46	8.36925	12.0796	coding	NM_002145	HOXB2	RefSeq_coding	1614	chr17	-	46620020	46622393		GGAGACATTTCAAACTTCATCAATCAAGGAGTCGACATTAATTCCTCCTCCTCCTCCTTT	3212	Hs.514289	GO:0043565|GO:0003700|GO:0030528|GO:0009952|GO:0008015|GO:0009953|GO:0048704|GO:0021612|GO:0002011|GO:0007275|GO:0048857|GO:0006355|GO:0021569|GO:0021570|GO:0005634	NP_002136	Homeobox B2
ASHG19A3H0000600	-10.292	-3.36346	10.292	down	52.6496	607.947	5.85496	9.21842	coding	NM_000523_Exon2-	NM_000523	HOX cluster	1459	chr2	-	176959207	176960666	nc-HOXD12-3+,	AAGAGTTCTGTTTATTGGCATCTCCCTAGGAGTAAAAAGTGATTTTTAAATGTCTGAAGC
ASHG19A3H0000602	-5.96718	-2.57705	5.96718	down	12.843	98.2251	3.86491	6.44196	coding	NM_021193_Exon2-	NM_021193	HOX cluster	239	chr2	-	176965249	176965488		TGAGGTTCAGCCTATTGGACAATTCCTTGCGTTTCTGCCTGTTGATGAATTCGTTGACGA
CUST_69_PI426249100	-3.62469	-1.85786	3.62469	down	8.38957	40.8154	3.27324	5.1311	coding	NM_006735_Exon1-	NM_006735	HOX cluster	666	chr7	-	27141728	27142394	uc.212-,NM_006735,	GATACATTTCAAAGTTCATCAATCAAGACCTCGACGCTTTCACACTCGACACTGATTCCT
ASHG19A3H0000568	-3.52519	-1.8177	3.52519	down	17.336	77.5905	4.27664	6.09435	coding	NM_018953_Exon1-	NM_018953	HOX cluster	529	chr12	-	54426831	54427360	uc.344-,	CGATCCATAGTTCCCACAAGTTTGCATGTTATAGGCAGGGATATTGGGGCTCTGCTTATA
CUST_22_PI426247286	-3.45292	-1.78782	3.45292	down	32.7785	139.416	5.19151	6.97933	coding	NM_004502_intron2-	NM_004502	HOX cluster	2422	chr17	-	46685457	46687880		GGGAAAATGGGCTTCTTTGCCCATCGCCCATTGACTTCAAATCACATACACGGTATAAGA
ASHG19A3H0000533	-3.35512	-1.74636	3.35512	down	151.685	548.334	7.31975	9.06611	coding	NM_014621_intron1-	NM_014621	HOX cluster	540	chr2	-	177016794	177017335		TCCTCAAACACACCCACATACCCCAGGCTTGCGGGATCCCCAAATGTGCTCCTTCTTCTG
CUST_18_PI426249100	-3.33591	-1.73808	3.33591	down	6.92902	32.5636	3.04831	4.78639	coding	NM_153633_Exon1+	NM_153633	HOX cluster	485	chr12	+	54447660	54448145	uc.345+,NM_153633,NM_014620,	AAGAATATTCGCAAAATAGCTACATCCCTGAACACAGTCCGGAATATTACGGCCGGACCA
ASHG19A3H0000515	-3.24103	-1.69645	3.24103	down	9.31658	40.5197	3.42401	5.12047	coding	NM_002146_intron3+	NM_002146	HOX cluster	2897	chr17	+	46629994	46632892		ACTGGGGCTCGAATCCATCTTAGGAACTGAAAAGGGAACTGACATCAATAGGGTTTTTTC
ASHG19A3H0000510	-3.09349	-1.62923	3.09349	down	5.51379	25.8645	2.80151	4.43075	coding	NM_014620_intron2-	NM_014620	HOX cluster	639	chr12	-	54447060	54447700	uc.345-,	CTGGAGTGGAAAATAATTTTTCTCGCTTTGTCGTTTTTCTGCTCCATAAAGCCCTCCTAC
CUST_68_PI426249100	-2.95743	-1.56434	2.95743	down	449.597	1281.92	8.79659	10.3609	coding	NM_006735_Exon2-	NM_006735	HOX cluster	1111	chr7	-	27139973	27141084	NM_006735,	CCTGAGAGCAGTATGAGGCCTGCAAGAAAGTGATCATATAATTGTATCTTCACTTTCTTT
ASHG19A3H0000625	-2.71893	-1.44304	2.71893	down	41.7942	138.7	5.52861	6.97165	coding	NM_153632_Exon2+	NM_153632	HOX cluster	162	chr7	+	27149733	27149895		TGGAGCTGCTGGTTTTCTGCTTTGTGTTTTGTCGAGACTCTTTCATCCAGGGGAAGATTT
ASHG19A3H0000576	-2.70281	-1.43446	2.70281	down	139.204	417.197	7.20621	8.64068	coding	NM_002145_Exon2+	NM_002145	HOX cluster	1089	chr17	+	46620020	46621109		AGAGGAAAATAGGTCCCTCTAGTTATTTTTAAGAAAGTCCCCCTAGAGTTTAATTATTCC
ASHG19A3H0000536	-2.51163	-1.32862	2.51163	down	8.15762	28.2022	3.23305	4.56167	coding	NM_024501_intron1-	NM_024501	HOX cluster	353	chr2	-	177054185	177054539		CCTAGGAACAGAATTTGTACCAGGAGAAGTTCCACGGAGAGCTCCTTCCTGAAATTTTCT
ASHG19A3H0000639	-2.45611	-1.29638	2.45611	down	8.18556	27.7743	3.23973	4.53611	coding	NM_152739_Exon1+	NM_152739	HOX cluster	653	chr7	+	27204496	27205149		CTCTCATTCTCAGCATTGTTTTCAGAGAAGGCGCCTTCGCTGGGTTGTTTTTCTCTATCA
ASHG19A3H0000564	-2.39557	-1.26037	2.39557	down	159.372	419.161	7.387	8.64737	coding	NM_153693_Exon1-	NM_153693	HOX cluster	557	chr12	-	54410641	54411198		TGCCGCTGCCGAGCCTGTCTCAGCTCCACACACACACACATATACTTTATATAAATTCAA
CUST_47_PI426247286	-2.36864	-1.24406	2.36864	down	620.607	1378.37	9.22226	10.4663	coding	NM_024014_intron2-	NM_024014	HOX cluster	1389	chr7	-	27185536	27186926		GAAAACATCTCGCTTGGTATGAAATAATCTCCCATTCAGTATGCTTTGGGCCCCAGACAT
CUST_54_PI426249100	-2.35862	-1.23795	2.35862	down	95.1469	260.167	6.6888	7.92674	coding	NM_014213_Exon1+	NM_014213	HOX cluster	901	chr2	+	176987412	176988313	NM_014213,	ATGTCTTCCAGTGGCACCCTCAGCAACTACTACGTGGACTCGCTTATAGGCCATGAGGGC
ASHG19A3H0000574	-2.32643	-1.21812	2.32643	down	207.544	516.003	7.7474	8.96552	coding	NM_002144_Exon2+	NM_002144	HOX cluster	431	chr17	+	46606806	46607237		GCTTCTTCTGCTTCATTCGTCGGTTCTGGAACCAAATCTTGACCTGTGTTTCATTGAGCT
ASHG19A3H0000616	-2.31033	-1.2081	2.31033	down	19.7765	58.8825	4.47226	5.68036	coding	NM_024501_Exon2-	NM_024501	HOX cluster	1096	chr2	-	177054539	177055635	Z49995,	AGTTCAGATTCTACTCTTTACCCATTCTGTGGATTTGTTCATCTAGTAACTAAACAGCGA
ASHG19A3H0000534	-2.25362	-1.17225	2.25362	down	44.7417	123.876	5.62592	6.79817	coding	NM_006898_intron1-	NM_006898	HOX cluster	4861	chr2	-	177028896	177033758		AGCTATTTCAGAGTATTTCAAAGTCCCAGCTATTCTGCAGTATTAATAGCTATTTCAGAG
CUST_50_PI426249100	-2.24872	-1.1691	2.24872	down	146.843	366.534	7.27423	8.44333	coding	NM_021192_Exon1+	NM_021192	HOX cluster	781	chr2	+	176972083	176972864	NM_021192,	GTCTGACTTCGCTAGCAAGCCTTCGTTCCTTTCCCAACCGTCGTCCTGCCAGATGACTTT
CUST_15_PI426249100	-2.19896	-1.13682	2.19896	down	100.79	256.081	6.77001	7.90683	coding	NM_018953_Exon1+	NM_018953	HOX cluster	529	chr12	+	54426831	54427360	uc.344+,NM_018953,	TATAAGCAGAGCCCCAATATCCCTGCCTATAACATGCAAACTTGTGGGAACTATGGATCG
ASHG19A3H0000550	-2.08138	-1.05754	2.08138	down	8.65901	24.9374	3.32046	4.378	coding	NM_018951_intron2+	NM_018951	HOX cluster	1174	chr7	+	27211792	27212967		CCCCGTTTTTGGCTTGCTGAGAGCAAGCAGTTCCTCCAAAAGTCATGACAAAAATTGAGT
ASHG19A3H0000556	-2.0611	-1.04341	2.0611	down	134.281	311.123	7.15576	8.19918	coding	NM_173860_Exon1-	NM_173860	HOX cluster	610	chr12	-	54348713	54349323		AAGGTGTCTCCCGTGTGGATGTTTACCAGCGGCCCCACAAACCCGGGATTCAGGAGATTA
CUST_52_PI426247286	-2.03358	-1.02402	2.03358	down	159.316	359.485	7.38641	8.41043	coding	NM_005523_intron2-	NM_005523	HOX cluster	1406	chr7	-	27222647	27224054		CCTCCTTCTGCCCAACTGCATGTTATTCACAATTGTTATTCAATCTGTCAAAAGCGATTT
ASHG19A3A032581	-2.03332	-1.02384	2.03332	down	33.1221	84.997	5.20734	6.23118	coding	NM_006735	HOXA2	RefSeq_coding	1791	chr7	-	27139973	27142394	uc.212-,	GATACATTTCAAAGTTCATCAATCAAGACCTCGACGCTTTCACACTCGACACTGATTCCT	3199	Hs.592177	GO:0043565|GO:0003700|GO:0030528|GO:0009952|GO:0035284|GO:0001709|GO:0009953|GO:0048704|GO:0048703|GO:0042474|GO:0008045|GO:0045665|GO:0000122|GO:0002076|GO:0045944|GO:0006355|GO:0021568|GO:0021658|GO:0007379|GO:0005730|GO:0005634	NP_006726	Homeobox A2
CUST_3_PI426247286	-2.03175	-1.02272	2.03175	down	7.07093	20.8741	3.06938	4.0921	coding	NM_014212_intron1+	NM_014212	HOX cluster	1256	chr12	+	54367707	54368964		TTTTGAAAATGTTCAAACTATGTGTTCGCGGGTCCTCGAGCAGAAACCCAAGCAACTCTG
ASHG19A3H0000504	2.04558	1.03251	2.04558	up	50.8327	32.2784	5.80568	4.77318	coding	NM_017409_intron1-	NM_017409	HOX cluster	3157	chr12	-	54379794	54382952		CTGTTAAAAATAACATTATTTACATAAGTATCCCTCGAAGTCGAAAACCCTCTCAGCGCT
ASHG19A3A048665	2.09009	1.06356	2.09009	up	2518.92	1073.18	11.1527	10.0892	coding	NM_014620	HOXC4	RefSeq_coding	2300	chr12	+	54410641	54449813		AGAAATGACGTCAGAATCATTTGCATCCCGCTGCCTCTACCTGCCTGGTCCAGCTGGGAC	3221	Hs.549040	GO:0043565|GO:0003700|GO:0030528|GO:0009952|GO:0051216|GO:0048562|GO:0007275|GO:0006355|GO:0006351|GO:0005634	NP_705897	Homeobox C4
ASHG19A3H0000624	2.11811	1.08278	2.11811	up	73.1538	44.0006	6.32644	5.24366	coding	NM_153631_Exon3+	NM_153631	HOX cluster	646	chr7	+	27149733	27150379		TGGAGCTGCTGGTTTTCTGCTTTGTGTTTTGTCGAGACTCTTTCATCCAGGGGAAGATTT
CUST_35_PI426247286	2.14578	1.1015	2.14578	up	51.5628	31.2825	5.82531	4.72381	coding	NM_006898_intron2+	NM_006898	HOX cluster	1860	chr2	+	177034383	177036244		TAGTAAAAGCCAGTGTTGAGGCTGCTGCTCCTAGCACTGTGAATACTCAAAATGCTTCCA
CUST_57_PI426249100	2.16052	1.11138	2.16052	up	1806.47	760.18	10.6729	9.56153	coding	NM_019558_Exon2+	NM_019558	HOX cluster	682	chr2	+	176996044	176996726	NM_019558,	TCTGAGCTAGTGATTTGCCTCAACAACGTAAACTTCCTAATGATTAGCACTTAATAATTG
ASHG19A3H0000569	2.19273	1.13273	2.19273	up	112.496	63.0082	6.91612	5.78339	coding	NM_018953_Exon2-	NM_018953	HOX cluster	1081	chr12	-	54428061	54429142		AGTCCTGTTCTCTCTTTATTTGATATGACAAAATATAGTTTCAGGAAGGACCCAGAGTCA
CUST_51_PI426247286	2.36876	1.24413	2.36876	up	238.16	115.201	7.93337	6.68924	coding	NM_153715_intron2-	NM_153715	HOX cluster	7471	chr7	-	27211792	27219264	NM_018951,	AAATGTCAGCCAGAAAGGGCTATCTGCTCCCTTCGCCAAATTATCCCACAACAATGTCAT
ASHG19A3H0000623	2.56594	1.35949	2.56594	up	3228.35	1113.29	11.5009	10.1414	coding	NM_153631_Exon4+	NM_153631	HOX cluster	2530	chr7	+	27145809	27148339		AATTTATAAAATTGCAGTTTTATTACAAAGATACCGATCTCCTTGCTCTCTCCCCCTCCC
CUST_25_PI426247286	2.66118	1.41207	2.66118	up	40.7363	20.7019	5.49071	4.07864	coding	NM_032391_intron2-	NM_032391	HOX cluster	417	chr17	-	46799261	46799679		CTTAATGTTTGTCTCCAATGGGATGGAGTCCTGGCATAAGCAAAATTAATATTGATAACG
ASHG19A3H0000638	2.79779	1.48429	2.79779	up	33.7683	16.7962	5.23552	3.75123	coding	NM_152739_Exon2+	NM_152739	HOX cluster	1403	chr7	+	27202057	27203460		TTATTTGGCAAAAAGTTAAATATCATCTCAACACAACAATTTGGTCAGTAGGCCTTGAGG
CUST_34_PI426249100	2.90788	1.53997	2.90788	up	44.8226	20.8389	5.629	4.08903	coding	NM_018952_Exon3-	NM_018952	HOX cluster	493	chr17	-	46675097	46675590	NM_018952,	AAGAGCAGAAGTGCTCCACTCCGGTCTACCCGTGGATGCAGCGGATGAATTCGTGCAACA
CUST_17_PI426247286	2.989	1.57966	2.989	up	22.7199	11.1955	4.67437	3.09471	coding	NM_024015_intron2-	NM_024015	HOX cluster	841	chr17	-	46654382	46655224		AACGCTGTGTTCCCTGGAAGAAAGGACTCTCTCTTTCGGGGGCAATAAAACTTTCTCTTT
CUST_52_PI426249100	3.00659	1.58813	3.00659	up	45.0447	20.3263	5.63814	4.05001	coding	NM_002148_Exon1+	NM_002148	HOX cluster	815	chr2	+	176981491	176982306	NM_002148,	TGGATATTTTAGACTGAGTCAGACCTACGCCACCGGGAAAACCCAAGAGTACAATAATAG
ASHG19A3A008514	3.13132	1.64677	3.13132	up	425.95	148.514	8.72406	7.07729	coding	NM_024017	HOXB9	RefSeq_coding	2711	chr17	-	46698525	46703835		TTTCTTTGGGGGTGATTGTCTCGCTTGTTTTCAGTTGTCGATTATATGGGAGGGTTCTGG	3219	Hs.463350	GO:0005515|GO:0043565|GO:0003700|GO:0016563|GO:0009952|GO:0060070|GO:0060326|GO:0048706|GO:0030879|GO:0007275|GO:0045944|GO:0006355|GO:0006351|GO:0005739|GO:0005730|GO:0005634|GO:0005634	NP_076922	Homeobox B9
CUST_30_PI426247286	3.13779	1.64975	3.13779	up	55.0149	23.2764	5.9177	4.26795	coding	NM_002148_intron1+	NM_002148	HOX cluster	1374	chr2	+	176982306	176983681		CCTTCCAAGGCCCACTTCATGTGAGTAATGTTTAATACTAGCATTTTCCAAAGCGGCCTG
CUST_67_PI426249100	3.28064	1.71398	3.28064	up	140.829	52.4452	7.22243	5.50845	coding	NM_153620_Exon1-	NM_153620	HOX cluster	448	chr7	-	27135177	27135625	NM_153620,NM_005522,	TATGGCTCACAGAACTTCAGTGCGCCTTACAGCCCCTACGCGTTAAATCAGGAAGCAGAC
CUST_11_PI426249100	3.44704	1.78536	3.44704	up	2832.8	742.58	11.3109	9.52557	coding	NM_153693_Exon1+	NM_153693	HOX cluster	557	chr12	+	54410641	54411198	NR_003084,NM_153693,NM_014620,	TTGAATTTATATAAAGTATATGTGTGTGTGTGTGGAGCTGAGACAGGCTCGGCAGCGGCA
ASHG19A3H0000640	3.71774	1.89443	3.71774	up	172.64	55.884	7.49731	5.60288	coding	NM_018951_Exon2+	NM_018951	HOX cluster	1582	chr7	+	27210210	27211792		GCTTCATTCCACAGCTTTTATTCTATAAGAACATAAACATCGTCTTTTTCCACGCACAGC
CUST_70_PI426249100	3.79776	1.92515	3.79776	up	94.1442	31.8331	6.67543	4.75028	coding	NM_153631_Exon4-	NM_153631	HOX cluster	2530	chr7	-	27145809	27148339	NM_153632,NM_153631,NM_030661,	GGGAGGGGGAGAGAGCAAGGAGATCGGTATCTTTGTAATAAAACTGCAATTTTATAAATT
CUST_20_PI426249100	4.03909	2.01403	4.03909	up	17339.4	3550.32	13.8555	11.8415	coding	NM_014620_Exon4+	NM_014620	HOX cluster	1180	chr12	+	54448633	54449813	NM_153633,NM_014620,	ATTTTAGTGTCGATGTGAAATGCCCCGTGATCAATAATAAACCAGTGGATGTGAATTAGT
CUST_31_PI426247286	4.49951	2.16977	4.49951	up	61.6612	18.4942	6.07327	3.9035	coding	NM_014213_intron1+	NM_014213	HOX cluster	347	chr2	+	176988313	176988661		TTATGATAATTCCCCACAAGTTGTGAAAAGCGACCATCCTTGGTGAAATTAATTTAACGA
ASHG19A3H0000586	4.92461	2.30001	4.92461	up	70.7326	19.4361	6.27882	3.97881	coding	NM_018952_Exon4+	NM_018952	HOX cluster	936	chr17	+	46673098	46674034		CGAAGTATTTCACGTCCAGAGCTAAGACAAGACTACAAACACAACACATAGAAAATTAAT
CUST_49_PI426247286	5.05927	2.33893	5.05927	up	133.566	33.1039	7.14807	4.80914	coding	NM_152739_intron2-	NM_152739	HOX cluster	1035	chr7	-	27203460	27204496		AAGTTTTACTGCGTGCAATTTTAAGTGACTGTCTGTGCGTCTGTCTGCCAGGGTTCCATT
CUST_53_PI426249100	5.06812	2.34145	5.06812	up	2869.96	523.338	11.3335	8.99201	coding	NM_002148_Exon2+	NM_002148	HOX cluster	988	chr2	+	176983681	176984669	nc-HOXD9-16-,NM_002148,	TGTCCTTTCTGTGCATGTTCTGGTCGCATGTATAATGCAATAAACTCTGGAAATGAGTTC
CUST_85_PI426249100	5.48272	2.45489	5.48272	up	1700.19	295.548	10.5796	8.12476	coding	NM_152739_Exon2-	NM_152739	HOX cluster	1403	chr7	-	27202057	27203460	NM_152739,	CCTCAAGGCCTACTGACCAAATTGTTGTGTTGAGATGATATTTAACTTTTTGCCAAATAA
CUST_12_PI426249100	5.70845	2.5131	5.70845	up	108.29	24.5237	6.86475	4.35165	coding	NM_004503_Exon1+	NM_004503	HOX cluster	512	chr12	+	54422193	54422705	uc.343+,NM_153693,NM_004503,	AAACACCTTAGGACATAACACACAGACCTCAATCGCTCAGGATTTTAGTTCTGAGCAGGG
ASHG19A3H0000630	5.90919	2.56296	5.90919	up	119.922	26.1234	7.00618	4.44322	coding	NM_002141_Exon2+	NM_002141	HOX cluster	1064	chr7	+	27168126	27169190	uc003syl.2,	AATGGAGTTTATTCTTAGCACATGGCTTTCTATGTAGCCACATCACAATTTGTACAGTTC
CUST_13_PI426249100	5.92094	2.56583	5.92094	up	105.56	23.2177	6.82891	4.26308	coding	NM_153693_Exon2+	NM_153693	HOX cluster	346	chr12	+	54422359	54422705	uc.343+,NM_153693,NM_004503,	AAACACCTTAGGACATAACACACAGACCTCAATCGCTCAGGATTTTAGTTCTGAGCAGGG
ASHG19A3H0000559	7.64025	2.93362	7.64025	up	308.169	47.0381	8.27917	5.34555	coding	NM_014212_Exon2-	NM_014212	HOX cluster	1237	chr12	-	54368964	54370201		TTCCCTCCAGGTGGAAAGAAACGCTTGGGAAATTTATTTACAAAAATCCAGGCCCCAGCA
CUST_33_PI426249100	7.72059	2.94871	7.72059	up	1592.85	202.619	10.4943	7.54561	coding	NM_018952_Exon4-	NM_018952	HOX cluster	936	chr17	-	46673098	46674034	NM_018952,	ATTAATTTTCTATGTGTTGTGTTTGTAGTCTTGTCTTAGCTCTGGACGTGAAATACTTCG
CUST_77_PI426249100	8.25536	3.04533	8.25536	up	3983.36	446.297	11.7889	8.74361	coding	NM_002141_Exon2-	NM_002141	HOX cluster	1064	chr7	-	27168126	27169190	NM_002141,	GAACTGTACAAATTGTGATGTGGCTACATAGAAAGCCATGTGCTAAGAATAAACTCCATT
CUST_6_PI426249100	8.26749	3.04745	8.26749	up	590.134	77.9711	9.1501	6.10266	coding	NM_014212_Exon2+	NM_014212	HOX cluster	1237	chr12	+	54368964	54370201	NM_014212,	TGCTGGGGCCTGGATTTTTGTAAATAAATTTCCCAAGCGTTTCTTTCCACCTGGAGGGAA
ASHG19A3A048658	9.43727	3.23837	9.43727	up	585.309	67.9303	9.13273	5.89436	coding	NM_014212	HOXC11	RefSeq_coding	2100	chr12	+	54366909	54370201		TGCTGGGGCCTGGATTTTTGTAAATAAATTTCCCAAGCGTTTCTTTCCACCTGGAGGGAA	3227	Hs.127562	GO:0003702|GO:0043565|GO:0003700|GO:0009952|GO:0042733|GO:0007492|GO:0001656|GO:0007275|GO:0001759|GO:0009954|GO:0006355|GO:0001501|GO:0005634	NP_055027	Homeobox C11
CUST_45_PI426249100	10.7707	3.42904	10.7707	up	171.355	20.4483	7.48831	4.05926	coding	NM_006361_Exon1-	NM_006361	HOX cluster	757	chr17	-	46805354	46806111	NM_006361,	AGATGTGTTGCCAGGGAGAACAGAACCCACCAGGTCCCTTTTGGAAGGCAGCATTTGCAG
CUST_41_PI426249100	10.9169	3.44849	10.9169	up	449.989	47.214	8.79869	5.3502	coding	NM_024017_Exon2-	NM_024017	HOX cluster	1972	chr17	-	46698525	46700497	NM_024017,	TTTCTTTGGGGGTGATTGTCTCGCTTGTTTTCAGTTGTCGATTATATGGGAGGGTTCTGG
CUST_31_PI426249100	21.859	4.45016	21.859	up	1350.99	64.5662	10.2705	5.82033	coding	NM_002147_Exon2-	NM_002147	HOX cluster	1199	chr17	-	46668619	46669818	NM_002147,	TGATTCGCTTTTGGTATTTGTTTGTAGCTTTCCTGGAAGTCAAATAAATGTTTCCCCCAC
ASHG19A3H0000577	22.6027	4.49842	22.6027	up	394.654	21.183	8.61574	4.11732	coding	NM_002145_Exon1+	NM_002145	HOX cluster	511	chr17	+	46621882	46622393		AAAGGAGGAGGAGGAGGAATTAATGTCGACTCCTTGATTGATGAAGTTTGAAATGTCTCC
CUST_10_PI426249100	23.5389	4.55698	23.5389	up	7574.23	298.338	12.6951	8.13816	coding	NM_022658_Exon2+	NM_022658	HOX cluster	1671	chr12	+	54404872	54406543	NM_022658,	CAGCCCTGTTCCTGGTCCAAGTACTTTGTATTGTATACGTGAGTCATAATAATAAAAAGA
CUST_51_PI426249100	25.1459	4.65225	25.1459	up	1292.31	54.2502	10.2095	5.55727	coding	NM_021192_Exon2+	NM_021192	HOX cluster	680	chr2	+	176973634	176974314	NM_021192,	CTTCCTCTTCGGTGAATGCAGGTTATTTAAACTTTGGGAAATGTACTTTTAGTCTGTCAT
ASHG19A3A016629	30.1585	4.91449	30.1585	up	1352.82	47.4628	10.2719	5.35738	coding	NM_021192	HOXD11	RefSeq_coding	1463	chr2	+	176972083	176974314		CTTCCTCTTCGGTGAATGCAGGTTATTTAAACTTTGGGAAATGTACTTTTAGTCTGTCAT	3237	Hs.421136	GO:0043565|GO:0003700|GO:0030528|GO:0009952|GO:0001658|GO:0060351|GO:0048589|GO:0009953|GO:0042733|GO:0001656|GO:0001759|GO:0007389|GO:0010720|GO:0032332|GO:0009954|GO:0006355|GO:0001501|GO:0006351|GO:0005634	NP_067015	Homeobox D11
CUST_87_PI426249100	34.5379	5.11011	34.5379	up	18167.5	466.004	13.9195	8.80941	coding	NM_018951_Exon2-	NM_018951	HOX cluster	1582	chr7	-	27210210	27211792	NM_153715,NM_018951,	GCTGTGCGTGGAAAAAGACGATGTTTATGTTCTTATAGAATAAAAGCTGTGGAATGAAGC
CUST_16_PI426249100	45.6339	5.51203	45.6339	up	3879.37	85.5952	11.7525	6.24042	coding	NM_018953_Exon2+	NM_018953	HOX cluster	1081	chr12	+	54428061	54429142	NR_003084,NM_018953,	TGACTCTGGGTCCTTCCTGAAACTATATTTTGTCATATCAAATAAAGAGAGAACAGGACT
CUST_14_PI426249100	58.8643	5.87932	58.8643	up	15449.8	241.184	13.6925	7.8132	coding	NM_004503_Exon2+	NM_004503	HOX cluster	1168	chr12	+	54423438	54424606	NM_153693,NM_004503,	TACCCTCCTGTATAAATCCAACCTCTGGGTCCGTTCTCGAATATTTAATAAAACTGATAT
CUST_8_PI426249100	164.228	7.35956	164.228	up	3654.8	23.8903	11.6684	4.30888	coding	NM_017409_Exon2+	NM_017409	HOX cluster	1108	chr12	+	54382952	54384060	NM_017409,	TCCCTGTCTGGGAGTTGTGTTATTTAAAGATATTCTGTATGTTGTATCTTTTGCATGTAG
CUST_44_PI426249100	691.745	9.4341	691.745	up	9171.69	14.7999	12.9732	3.53909	coding	NM_006361_Exon2-	NM_006361	HOX cluster	2277	chr17	-	46802128	46804405	NM_006361,	GCTATCAGAAACTTAAACTTGAGGATTTTCTCTGTTTTTCACTCGCAATAAATTCAGAGC
ASHG19A3H0000157	-67.63	-6.07959	67.63	down	656.016	39524	9.29454	15.3741	noncoding	nc-HOXC9-131-	nc-HOXC9-131	HOX cluster	198	chr12	+	54384395	54384593		ACTGCTGCTGGGGGTCACCCCAAGAGCCCCCCACCCATCCAAGGAAAGGAATAAACTTAA
ASHG19A3H0000107	-11.0646	-3.46788	11.0646	down	1489.11	14131.5	10.4017	13.8696	noncoding	nc-HOXC10-128-	nc-HOXC10-128	HOX cluster	158	chr12	+	54378343	54378501		CCACAAACCTCACCCCACTCCCATCCCCAAGGTAAGAAGTGGGAGTCGGGTCCGGGGATA
CUST_88_PI426075208	-6.27793	-2.65029	6.27793	down	706.447	4082.32	9.39067	12.041	noncoding	nc-HOXB2-162+	nc-HOXB2-162	HOX cluster	178	chr17	+	46623286	46623464		TTAACTTAGAGCACTCTCAAAGTTCAGATCAGCGTTATGTGTGTGCATGAGTGTGGTGGG
CUST_87_PI426075208	-5.54875	-2.47216	5.54875	down	207.563	1171.58	7.74757	10.2197	noncoding	nc-HOXB2-161+	nc-HOXB2-161	HOX cluster	418	chr17	+	46622846	46623264		ACAACAGTTAAATCTTGGGAAATGGACAGGAACTCCCAGGCAGACACATAGGAGTGAGAT
CUST_15_PI426075208	-4.68378	-2.22767	4.68378	down	276.646	1273.84	8.12447	10.3521	noncoding	nc-HOXA13-97+	nc-HOXA13-97	HOX cluster	348	chr7	+	27241198	27241546		TTTAGCAGTTCTGGGTAAATATTGATTTGCCCCCAGTTTACCTTCTCCCTGACTGGCCAT
ASHG19A3A032595	-4.05679	-2.02034	4.05679	down	41.6916	202.547	5.52471	7.54505	noncoding	HIT000098379		H-invDB	227	chr7	-	27235768	27235994		ACCTCCTTGACTTTAGAGATTCAGTACTCAATTATTTGGCTCCAGCTGGAGCAAATTTGA
CUST_183_PI426075208	-3.81702	-1.93245	3.81702	down	188.181	756.058	7.62031	9.55275	noncoding	nc-HOXD3-42+	nc-HOXD3-42	HOX cluster	178	chr2	-	177026009	177026187		TTTTCAGCCCATTCTCCTAAGTGCACATTTAGCCCCCAAATATTTCCTCCAGCACTCAAT
ASHG19A3H0000129	-3.47583	-1.79736	3.47583	down	142.338	537.423	7.23629	9.03365	noncoding	nc-HOXC5-255-	nc-HOXC5-255	HOX cluster	468	chr12	+	54425701	54426169		ATAACGGGCCTTTTCCTCTGCCATGCTCACGTAATATTTGTGGAGGCTTCAATCTTGCTT
ASHG19A3H0000008	-3.35415	-1.74595	3.35415	down	235.128	813.927	7.91751	9.66345	noncoding	nc-HOXA11-90-	nc-HOXA11-90	HOX cluster	168	chr7	-	27231227	27231395		CTTTGGTGAGACCCTTGATGCTCTTCTCCTGCCTAAAATCCACACAGATGTGAGGCGCAC
CUST_170_PI426075208	-3.28166	-1.71443	3.28166	down	159.169	558.669	7.38432	9.09874	noncoding	nc-HOXD10-8+	nc-HOXD10-8	HOX cluster	1788	chr2	-	176974818	176976606		TAAAGTGCAGTAGAGCCCTCACCACATTCTTTAACTTGAAGCGATAAATGCCGTGAGAGG
CUST_124_PI426075208	-3.02461	-1.59675	3.02461	down	31.6317	118.703	5.13966	6.73641	noncoding	nc-HOXC4-153+	nc-HOXC4-153	HOX cluster	519	chr12	-	54408220	54408739		TAGCAATCATAATTCCACGTTTAAAAACGAAACGGGACCTCAGCCATCCCTCGGAGTATG
CUST_16_PI426075208	-2.98065	-1.57563	2.98065	down	86.9643	298.317	6.56227	8.13789	noncoding	nc-HOXA13-98+	nc-HOXA13-98	HOX cluster	208	chr7	+	27241728	27241936		TTTTTAAAATTCTCGCCTCTGACTCTGTTCGGCTGCCCAGAATTTTTTGGTGCCTTCGTG
ASHG19A3A014666	-2.96021	-1.5657	2.96021	down	14.6374	56.2623	4.04711	5.61281	noncoding	ENST00000440016	AC009336.21	Ensembl	582	chr2	-	176987087	177001741		TCGCTGACTCTCCAGCTTCCGAGCCGCGGGCGGCGAGTCCAGGGCACACGGAGCGGCCGC
ASHG19A3A014666	-2.96021	-1.5657	2.96021	down	14.6374	56.2623	4.04711	5.61281	noncoding	ENST00000440016	AC009336.21	Ensembl	582	chr2	-	176987087	177001741		TCGCTGACTCTCCAGCTTCCGAGCCGCGGGCGGCGAGTCCAGGGCACACGGAGCGGCCGC
ASHG19A3A014666	-2.96021	-1.5657	2.96021	down	14.6374	56.2623	4.04711	5.61281	noncoding	ENST00000440016	AC009336.21	Ensembl	582	chr2	-	176987087	177001741		TCGCTGACTCTCCAGCTTCCGAGCCGCGGGCGGCGAGTCCAGGGCACACGGAGCGGCCGC
ASHG19A3A014666	-2.96021	-1.5657	2.96021	down	14.6374	56.2623	4.04711	5.61281	noncoding	ENST00000440016	AC009336.21	Ensembl	582	chr2	-	176987087	177001741		TCGCTGACTCTCCAGCTTCCGAGCCGCGGGCGGCGAGTCCAGGGCACACGGAGCGGCCGC
CUST_69_PI426075208	-2.83768	-1.50471	2.83768	down	256.027	746.279	8.02764	9.53235	noncoding	nc-HOXB9-196+	nc-HOXB9-196	HOX cluster	208	chr17	+	46782504	46782712		AGAGACAGAAATCAAATCTAGGGTGTTCATCTAGAGTCTCCTGCTCCTCCATTCCTGCTT
ASHG19A3H0000122	-2.78818	-1.47932	2.78818	down	22364.4	48905.8	14.2041	15.6834	noncoding	nc-HOXC13-102-	nc-HOXC13-102	HOX cluster	108	chr12	+	54332232	54332340		CCCTACACCCCTTTGCGTCGGCCAAATTCAGCCTCCCCCCCCTCCCTCTCCCTCCCTGGG
ASHG19A3H0000191	-2.75525	-1.46218	2.75525	down	124.357	383.904	7.05304	8.51522	noncoding	nc-HOXD4-28-	nc-HOXD4-28	HOX cluster	248	chr2	+	177005928	177006176		CAGCGACACCTTACTTAAATAATGCTCTGACCCAATCCCACTGATCCTCCGTTATCTCTT
ASHG19A3H0000083	-2.74841	-1.4586	2.74841	down	16.3621	57.7701	4.19501	5.65361	noncoding	nc-HOXA1-55-	nc-HOXA1-55	HOX cluster	328	chr7	-	27136777	27137105		AACCTAATAGTAAACAACAATTTAACGACCTCAGCAGCCTCAGGGAAGTAGGGTGATGAG
ASHG19A3H0000141	-2.74192	-1.45519	2.74192	down	66.5056	216.466	6.18693	7.64212	noncoding	nc-HOXC6-247-	nc-HOXC6-247	HOX cluster	138	chr12	+	54417941	54418079		CAGTGGCACAAAAGGGGCCAGCGGGGCAACCGTTCTTCTCTTGCTCAGAAAAGTGAGACT
ASHG19A3H0000141	-2.74192	-1.45519	2.74192	down	66.5056	216.466	6.18693	7.64212	noncoding	nc-HOXC6-247-	nc-HOXC6-247	HOX cluster	138	chr12	+	54417941	54418079		CAGTGGCACAAAAGGGGCCAGCGGGGCAACCGTTCTTCTCTTGCTCAGAAAAGTGAGACT
CUST_26_PI426075208	-2.67902	-1.4217	2.67902	down	22.2792	75.9243	4.64136	6.06306	noncoding	nc-HOXA4-64+	nc-HOXA4-64	HOX cluster	138	chr7	+	27178897	27179035		CCTTGGTCCTCAGGGTCCAGTGGGCGCTAGCAGCCCAGGATCCACCTTGCAACCCGGGGG
CUST_157_PI426075208	-2.66169	-1.41234	2.66169	down	16.9691	57.9763	4.2463	5.65864	noncoding	nc-HOXC9-131+	nc-HOXC9-131	HOX cluster	198	chr12	-	54384395	54384593		TTAAGTTTATTCCTTTCCTTGGATGGGTGGGGGGCTCTTGGGGTGACCCCCAGCAGCAGT
CUST_44_PI426075208	-2.60791	-1.3829	2.60791	down	136.951	398.01	7.18498	8.56787	noncoding	nc-HOXB2-164+	nc-HOXB2-164	HOX cluster	1039	chr17	+	46626206	46627245		TGGGAAAGTTGGAAGGGAACGTGTTTTGTGCCTTTTGGGTTTGAAATGTGTTTTCTTATT
CUST_137_PI426075208	-2.57744	-1.36594	2.57744	down	351.949	903.26	8.46484	9.83078	noncoding	nc-HOXC6-243+	nc-HOXC6-243	HOX cluster	958	chr12	-	54414121	54415079		ATATAATAAATATATAACACTCCCAAGCCTGGTTTCAGAACACAGCCAACCCAACAAGGT
CUST_137_PI426075208	-2.57744	-1.36594	2.57744	down	351.949	903.26	8.46484	9.83078	noncoding	nc-HOXC6-243+	nc-HOXC6-243	HOX cluster	958	chr12	-	54414121	54415079		ATATAATAAATATATAACACTCCCAAGCCTGGTTTCAGAACACAGCCAACCCAACAAGGT
CUST_113_PI426075208	-2.48986	-1.31606	2.48986	down	425.921	1038.36	8.72398	10.04	noncoding	nc-HOXC11-111+	nc-HOXC11-111	HOX cluster	698	chr12	-	54360504	54361202		TTATTTTCCTCTCCTTCTTTCTCTCTGTTCATCCCCAGTGCTACCCTGGAGGAAAAGGAT
ASHG19A3H0000029	-2.46024	-1.2988	2.46024	down	8.22581	27.9243	3.24709	4.54589	noncoding	nc-HOXA6-69-	nc-HOXA6-69	HOX cluster	128	chr7	-	27190967	27191095		AGCTAAGGTTGAAGGAAGGACGCAAACCGAGTCTGGGCGATAGGGGGACCCCCCAATCCA
ASHG19A3H0000031	-2.45702	-1.29691	2.45702	down	203.765	533.895	7.72651	9.02342	noncoding	nc-HOXA6-71-	nc-HOXA6-71	HOX cluster	218	chr7	-	27192547	27192765		GCATGCGCCCTGAACCCAGCCCCAGGCTAGGAAATGGGATTTAAGGTCCCCACCCCGCCT
ASHG19A3H0000064	-2.39017	-1.25711	2.39017	down	4566.41	9238.53	11.9937	13.2509	noncoding	nc-HOXB9-187-	nc-HOXB9-187	HOX cluster	168	chr17	-	46715907	46716075		TGGCTCTCTGTGAACAAAGCAGGTTTCCTCCTTGCCACTCACCCCCACCCCCCATACCAC
ASHG19A3H0000074	-2.30998	-1.20788	2.30998	down	112.723	295.808	6.91842	8.1263	noncoding	nc-HOXB9-203-	nc-HOXB9-203	HOX cluster	118	chr17	-	46799885	46800003		TCCAGCTTTCGCCCCTACTTGCAGCTATGAGGTGGGGAGCCACCAACCGCAGGCCTTCTT
ASHG19A3H0000139	-2.26316	-1.17834	2.26316	down	18.7497	54.7783	4.3944	5.57274	noncoding	nc-HOXC6-245-	nc-HOXC6-245	HOX cluster	218	chr12	+	54416621	54416839		TTCTTCCTCATGTGACATCCTCTTGAGGCCCTATTCTGGGGGCTGAAAATATTCTGGATA
ASHG19A3H0000139	-2.26316	-1.17834	2.26316	down	18.7497	54.7783	4.3944	5.57274	noncoding	nc-HOXC6-245-	nc-HOXC6-245	HOX cluster	218	chr12	+	54416621	54416839		TTCTTCCTCATGTGACATCCTCTTGAGGCCCTATTCTGGGGGCTGAAAATATTCTGGATA
ASHG19A3H0000043	-2.17846	-1.12331	2.17846	down	323.093	714.728	8.3479	9.47121	noncoding	nc-HOXB2-160-	nc-HOXB2-160	HOX cluster	310	chr17	-	46622394	46622704		GGGGCTCATGGTGTCCTGGTCGTGGTCCTCTGGTGTTTTTGAATCAATTAAACCAAATAA
CUST_41_PI426075208	-2.15744	-1.10932	2.15744	down	16.0477	44.9937	4.16734	5.27666	noncoding	nc-HOXB1-159+	nc-HOXB1-159	HOX cluster	608	chr17	+	46618416	46619024		TGATACGTGAAATGAAGTTGTTGGTCAAGACTGGTGGGTCTGCATTCAGAGAAAGCTCTG
ASHG19A3H0000054	-2.1289	-1.09011	2.1289	down	78.7149	199.8	6.43343	7.52353	noncoding	nc-HOXB4-176-	nc-HOXB4-176	HOX cluster	158	chr17	-	46667810	46667968		CAAGTCTGGACACTTACCCGGTCAATCCCTTCCAGCTTGGCCCAACTTCTTACTGGACTT
ASHG19A3H0000184	-2.12741	-1.0891	2.12741	down	98.6172	243.943	6.74169	7.83079	noncoding	nc-HOXD3-43-	nc-HOXD3-43	HOX cluster	368	chr2	+	177027239	177027607		CTGAAGGCTTTTCTGGTGGTCCAACTTTGGTTAACTTGGGGTCCTCTTTCCTTTCTTCTT
CUST_204_PI426075208	-2.10909	-1.07662	2.10909	down	29.9259	79.9844	5.06633	6.14295	noncoding	nc-HOXD9-18+	nc-HOXD9-18	HOX cluster	178	chr2	-	176986908	176987086		CCACACACACGCTTGCTCACAGCTTGTCGTGTTGTTTAAAACAGGTGGAAGACCTCTGTA
ASHG19A3H0000135	-2.08582	-1.06062	2.08582	down	27.491	73.2802	4.94557	6.00619	noncoding	nc-HOXC6-241-	nc-HOXC6-241	HOX cluster	208	chr12	+	54413201	54413409		CGAAAAAGGGAGCCTTTCTCCTGGAGTAATGTGGGAATCGCCGACCGGTGAGGCCTCTAT
ASHG19A3H0000135	-2.08582	-1.06062	2.08582	down	27.491	73.2802	4.94557	6.00619	noncoding	nc-HOXC6-241-	nc-HOXC6-241	HOX cluster	208	chr12	+	54413201	54413409		CGAAAAAGGGAGCCTTTCTCCTGGAGTAATGTGGGAATCGCCGACCGGTGAGGCCTCTAT
ASHG19A3H0000213	-2.07024	-1.0498	2.07024	down	36.7277	95.5451	5.35129	6.40109	noncoding	nc-HOXD8-21-	nc-HOXD8-21	HOX cluster	348	chr2	+	176993168	176993516		CGAGCAGGAGAGGGGAAAACACACACACACAACAGAGAACCATTGCATTTATTGGACATT
ASHG19A3H0000063	-2.06688	-1.04746	2.06688	down	103.895	248.508	6.81145	7.85891	noncoding	nc-HOXB9-186-	nc-HOXB9-186	HOX cluster	168	chr17	-	46715352	46715520		TGCACATATTCACACACACACTCACACACAGGAATGCTGACACATACAGACCCGACTTTA
CUST_182_PI426075208	-2.06456	-1.04583	2.06456	down	2089.72	3777.44	10.8881	11.9339	noncoding	nc-HOXD3-41+	nc-HOXD3-41	HOX cluster	128	chr2	-	177025459	177025587		GAGCGGCAGCCACCCGCGCCCCCACCCACTCCTGGGTTTCTGCCCAGCCCTCCCAGGCCC
ASHG19A3H0000161	-2.06131	-1.04356	2.06131	down	651.051	1250.18	9.28551	10.3291	noncoding	nc-HOXC9-140-	nc-HOXC9-140	HOX cluster	938	chr12	+	54391845	54392783		ACAGACTGGGACTCTTCCTTTCTGACCCTGAAATTGCACCCCTCCTTTAAATTCACTCTA
CUST_35_PI426075208	-2.01943	-1.01395	2.01943	down	51.4978	127.448	5.82358	6.83753	noncoding	nc-HOXA7-75+	nc-HOXA7-75	HOX cluster	108	chr7	+	27200477	27200585		GGGTCAGGGAGGCGCGAGCGGTGAGGGTCGGGCAAGCCCCCGCCGATTCCTTGTTTCCCA
CUST_105_PI426075208	2.00196	1.00141	2.00196	up	32.1192	21.7215	5.16194	4.16053	noncoding	nc-HOXC10-126+	nc-HOXC10-126	HOX cluster	228	chr12	-	54377223	54377451		ATTTGAAATGGTTTTGTGTTTTCATATGCAGGGTCACCGTGGCCTCAGCATGGGGGTTAT
ASHG19A3H0000182	2.01072	1.00771	2.01072	up	100.012	61.8882	6.76183	5.75412	noncoding	nc-HOXD3-41-	nc-HOXD3-41	HOX cluster	128	chr2	+	177025459	177025587		GGGCCTGGGAGGGCTGGGCAGAAACCCAGGAGTGGGTGGGGGCGCGGGTGGCTGCCGCTC
ASHG19A3H0000206	2.02049	1.01471	2.02049	up	25.0336	17.3423	4.81523	3.80053	noncoding	nc-HOXC4-154-	nc-HOXC4-154	HOX cluster	1349	chr12	+	54408830	54410179		CATCTCGCTCATTGCTCCTTGAATTTATTATTCTAATCTCAACCGTAGAGCTGGAATAAT
ASHG19A3H0000207	2.08223	1.05813	2.08223	up	82.5267	50.0735	6.49465	5.43652	noncoding	nc-HOXC9-133-	nc-HOXC9-133	HOX cluster	108	chr12	+	54387975	54388083		GAAGAAGACGGCGGCAGCGGGGACTGGGGGCTTCGGGTGGGAACGCCAGGGCTCAGGGCT
CUST_75_PI426075208	2.084	1.05935	2.084	up	2908.5	1224.27	11.3519	10.2926	noncoding	nc-HOXB9-204+	nc-HOXB9-204	HOX cluster	198	chr17	+	46800195	46800393		AGGAGAGAAGGTAATGGTGGAATTCTTTCCCTCACTCTCCCCCGACCACTTCGTCCCCTC
CUST_70_PI426075208	2.12328	1.08629	2.12328	up	223.286	120.598	7.84642	6.76013	noncoding	nc-HOXB9-197+	nc-HOXB9-197	HOX cluster	198	chr17	+	46783424	46783622		ATCTTTTCTGGAACTGAACATCCATCCTTAAGGCCAGATTTCTCCCATCACCAACTTTAA
CUST_114_PI426075208	2.14396	1.10028	2.14396	up	32.929	20.9693	5.19847	4.09819	noncoding	nc-HOXC11-112+	nc-HOXC11-112	HOX cluster	1118	chr12	-	54361354	54362472		AACTGTTTAAAATACTATCCACCGAACTCTAGATACTGCCAAAGAGAGCCTGCTGTTCCC
CUST_33_PI426075208	2.24752	1.16833	2.24752	up	26565.3	9450.34	14.4461	13.2777	noncoding	nc-HOXA7-73+	nc-HOXA7-73	HOX cluster	148	chr7	+	27196467	27196615		GCCCCCCCGCCGACTCCTGCTAGTGAGCCCTGGACCAAGCTTGGGATCCTCCCCATCCCT
CUST_173_PI426075208	2.26693	1.18074	2.26693	up	159.365	83.6194	7.38687	6.20613	noncoding	nc-HOXD11-5+	nc-HOXD11-5	HOX cluster	228	chr2	-	176968692	176968920		ATGAATATTTACAACGGTTCCAGATTTCTCTTCCACCCGCCGGCATCCCGGAAGCCTCCT
ASHG19A3A034091	2.28589	1.19276	2.28589	up	81.53	45.227	6.47707	5.28431	noncoding	NR_002795	HOXA11AS	RefSeq_NR	1628	chr7	+	27225026	27228912		ATTTGCACGGTGACTTGATTACACTCTCTCATTCATGGTCACTTCCGAAGCGCTTTAGTG
ASHG19A3H0000009	2.35887	1.23809	2.35887	up	347.896	162.816	8.44946	7.21137	noncoding	nc-HOXA11-91-	nc-HOXA11-91	HOX cluster	118	chr7	-	27232517	27232635		GAGAATAATCGGGTATTTAATCTCTCCCGGTCTTAATTCTTGGCAGCGTGGAAGGTGGTT
ASHG19A3A008515	2.37399	1.24731	2.37399	up	27.0332	16.0651	4.92543	3.67812	noncoding	ENST00000438772	AC036222.1	Ensembl	595	chr17	-	46710868	46724152		TTCATCAACACGGTGAAGTTTTATTGTATTTCCGGTCCCCAAGATTTATACCCGGGAGGG
ASHG19A3A009656	2.37489	1.24786	2.37489	up	1306.01	519.603	10.2256	8.97778	noncoding	ENST00000489624	COX6B1P2	Ensembl	216	chr17	+	46791091	46791307		TTTGTATGTGAATGGTACCAGCCTGTGTACAAGTCCCTCATTCCCATATCCTGGATCTCA
CUST_50_PI426075208	2.37491	1.24787	2.37491	up	98.7534	52.0296	6.7437	5.49583	noncoding	nc-HOXB4-172+	nc-HOXB4-172	HOX cluster	148	chr17	+	46663130	46663278		AATAGGGTATCCTCTATCATGCCTCCAAATCCCTCAAGAGGCGACGCCCCACACAGGCTG
CUST_78_PI426075208	2.39354	1.25915	2.39354	up	77.7159	41.4268	6.41334	5.15419	noncoding	nc-HOXA11-84+	nc-HOXA11-84	HOX cluster	708	chr7	+	27225087	27225795		ATTTGCACGGTGACTTGATTACACTCTCTCATTCATGGTCACTTCCGAAGCGCTTTAGTG
CUST_24_PI426075208	2.49875	1.32121	2.49875	up	127.43	62.1572	7.08308	5.76187	noncoding	nc-HOXA4-62+	nc-HOXA4-62	HOX cluster	148	chr7	+	27171207	27171355		AAGCAACACCTCCACAGAACCGAGCTTTGAAAACAATAACTTCCTATTTCAGAACTATCC
ASHG19A3H0000205	2.53643	1.3428	2.53643	up	14014.1	4571.33	13.5487	12.2059	noncoding	nc-HOXC10-129-	nc-HOXC10-129	HOX cluster	260	chr12	+	54378513	54378773		CTCCACCCCTCTACCTCCCCTGCCGCCCGGGGGGCGCTTCCTTTGTTCGCGGGGAAGGGC
ASHG19A3H0000034	2.61924	1.38915	2.61924	up	4207.21	1402.17	11.8753	10.4861	noncoding	nc-HOXA7-74-	nc-HOXA7-74	HOX cluster	238	chr7	-	27197697	27197935		TGCGCAGGAACTGGGGCTCCGTGGCGTCCCGATCTGAACCCTCCCTCCACCTTTTGTATT
ASHG19A3A000386	2.83339	1.50253	2.83339	up	155.257	65.9898	7.35245	5.84992	noncoding	ENST00000465846	RP11-357H14.7	Ensembl	419	chr17	+	46627246	46679694		ATTTGGGGGGAATTACCTACAAAGATGTAAGGTTGCTTGTCTGGAGATGGAGCCACTACA
ASHG19A3A000386	2.83339	1.50253	2.83339	up	155.257	65.9898	7.35245	5.84992	noncoding	ENST00000465846	RP11-357H14.7	Ensembl	419	chr17	+	46627246	46679694		ATTTGGGGGGAATTACCTACAAAGATGTAAGGTTGCTTGTCTGGAGATGGAGCCACTACA
ASHG19A3A000386	2.83339	1.50253	2.83339	up	155.257	65.9898	7.35245	5.84992	noncoding	ENST00000465846	RP11-357H14.7	Ensembl	419	chr17	+	46627246	46679694		ATTTGGGGGGAATTACCTACAAAGATGTAAGGTTGCTTGTCTGGAGATGGAGCCACTACA
ASHG19A3A000386	2.83339	1.50253	2.83339	up	155.257	65.9898	7.35245	5.84992	noncoding	ENST00000465846	RP11-357H14.7	Ensembl	419	chr17	+	46627246	46679694		ATTTGGGGGGAATTACCTACAAAGATGTAAGGTTGCTTGTCTGGAGATGGAGCCACTACA
ASHG19A3H0000162	2.90699	1.53953	2.90699	up	48.3455	22.2803	5.73658	4.19706	noncoding	nc-HOXC9-141-	nc-HOXC9-141	HOX cluster	478	chr12	+	54392875	54393353		GACGCCCCACTTAAGTTGTGTAGATCTCTCCTACACTTCTTCAAGCTGGCAAAGAAAGAT
ASHG19A3A014670	2.97164	1.57126	2.97164	up	183.165	73.2889	7.57757	6.00631	noncoding	ENST00000417086	AC009336.23	Ensembl	984	chr2	-	177040721	177053268		CGACCGGGGGCTGCCTGGGCAAGGGCGGGGCGAGAGGGCAGAACGCCTGCTCTCGGACAG
CUST_63_PI426075208	2.98762	1.579	2.98762	up	1238.8	396.173	10.1396	8.56064	noncoding	nc-HOXB9-186+	nc-HOXB9-186	HOX cluster	168	chr17	+	46715352	46715520		TAAAGTCGGGTCTGTATGTGTCAGCATTCCTGTGTGTGAGTGTGTGTGTGAATATGTGCA
CUST_200_PI426075208	3.02537	1.59711	3.02537	up	33.2049	15.458	5.2113	3.61419	noncoding	nc-HOXD8-19+	nc-HOXD8-19	HOX cluster	160	chr2	-	176989526	176989686		TCAGGTCAGCATTTATTAGTAGGAAGCAGTAACATTTACAACTGGTCCTCGGGCAGGAAC
ASHG19A3H0000100	3.04784	1.60779	3.04784	up	2011.24	610.767	10.8334	9.22564	noncoding	nc-HOXC10-121-	nc-HOXC10-121	HOX cluster	248	chr12	+	54373384	54373632		CGCACCCCTCCAACCCACTGCACAAAGCAAAGACCCATAACCTTGACTCAGACTGCTGAT
CUST_3_PI426075208	3.17528	1.66688	3.17528	up	323.488	114.729	8.34907	6.68219	noncoding	nc-HOXA11-83+	nc-HOXA11-83	HOX cluster	223	chr7	+	27224832	27225055		TGAAGTAGAAATTTGGAGACGTAAGCTGACGTGGAAATCTATCCCCATCCTTAGCAGGGA
ASHG19A3H0000090	3.25028	1.70057	3.25028	up	66.1815	26.7043	6.17823	4.47767	noncoding	nc-HOXB4-168-	nc-HOXB4-168	HOX cluster	1808	chr17	-	46657690	46659498		GTCTGAGATTACCTATTGGACCCTCTCTTGGCAAAGACAACCATAGTGTGATAGTTTGCT
CUST_95_PI426075208	3.30896	1.72638	3.30896	up	6736.27	1749.33	12.5351	10.8088	noncoding	nc-HOXB9-199+	nc-HOXB9-199	HOX cluster	188	chr17	+	46791012	46791200		GGAACTGCTTGCAGGACTACCTGGACTTCCACCTCTGTGAGAAGGCAGTGATTGCTAAAG
ASHG19A3H0000102	3.37417	1.75453	3.37417	up	245.226	83.9629	7.96816	6.21362	noncoding	nc-HOXC10-123-	nc-HOXC10-123	HOX cluster	148	chr12	+	54374923	54375071		GTAGCATCTGTGTGCAAGTGTGTGCAATGTCAAGACGTGAGAGATTCTGCTGGCCGAGCT
CUST_177_PI426075208	3.39347	1.76276	3.39347	up	6968.58	1755.13	12.5761	10.8134	noncoding	nc-HOXD1-48+	nc-HOXD1-48	HOX cluster	138	chr2	-	177046473	177046611		AGAGACACTTTTTACTAGCATAATTTATATATATGTGTGTGTGTGTGTGTACTCCACAGG
ASHG19A3A016637	3.3953	1.76354	3.3953	up	932.131	272.667	9.76426	8.00072	noncoding	ENST00000426615	AC009336.24	Ensembl	658	chr2	+	177042908	177043737		GAAGTAGGCTAAGACTGCTGTTGAACTTGAAGCTAAACTTGAATGCCATTTAAAATAACA
ASHG19A3H0000085	3.43367	1.77975	3.43367	up	96.6467	35.7736	6.71191	4.93216	noncoding	nc-HOXA5-68-	nc-HOXA5-68	HOX cluster	648	chr7	-	27183537	27184185		CCGGACCCTGTGATGAAGATTTTCCAGGCTGGATACGTAAGCAAATCAAATCGCAAACTA
ASHG19A3H0000172	4.0609	2.0218	4.0609	up	43.4256	15.0121	5.58577	3.56396	noncoding	nc-HOXD11-4-	nc-HOXD11-4	HOX cluster	488	chr2	+	176968082	176968570		AGGAAAGCATATGAACTCAGATCCAGGCCTTAAGACAGAAAACACGGAGGCCGTTTCTTT
ASHG19A3H0000174	4.31698	2.11002	4.31698	up	42.0207	13.8413	5.53646	3.42643	noncoding	nc-HOXD12-3-	nc-HOXD12-3	HOX cluster	858	chr2	+	176959802	176960660		TATTTGTTCATTCCCAGCACTGATTATCTTCATAATCCATTAGGACAGAATGGTTTTCAG
ASHG19A3H0000080	4.4104	2.14091	4.4104	up	1266.43	279.047	10.1763	8.03539	noncoding	nc-HOXA13-96-	nc-HOXA13-96	HOX cluster	318	chr7	-	27240358	27240676		TCAGTGTACACTGTGTGTGTGTGTGATGAGTCGTTCTGAGTCTATGGGTCTAAATGCAAA
ASHG19A3H0000181	4.41366	2.14198	4.41366	up	37.3519	12.2897	5.37423	3.23225	noncoding	nc-HOXD3-39-	nc-HOXD3-39	HOX cluster	2228	chr2	+	177018599	177020827		TGGGGAAAGAAAACAAAACCTCTATGCACTGGGTCATTAGATAATGACTGAATTTTCTGT
ASHG19A3H0000023	5.15882	2.36704	5.15882	up	166.447	39.6532	7.45069	5.08365	noncoding	nc-HOXA4-61-	nc-HOXA4-61	HOX cluster	158	chr7	-	27170427	27170585		GGGGCGCTGCACGTGGGGCACGGGGCGGGGCGCGCGCTGGGCTGGGGAGGAGCGGCTCGA
ASHG19A3A047643	5.70843	2.51309	5.70843	up	4678.81	738.738	12.0303	9.51718	noncoding	NR_003716	HOTAIR	RefSeq_NR	2337	chr12	-	54356097	54362515		CCTTGTGTAGGTTGTGTGTGTGTGGTGGTTTTATGCATAAATAAAGTTTTACATGTGGTG
CUST_187_PI426075208	6.12856	2.61555	6.12856	up	155.847	31.6331	7.35783	4.74229	noncoding	nc-HOXD4-22+	nc-HOXD4-22	HOX cluster	706	chr2	-	176996730	176997436		TACGCAAAGAAACCTTTTAGGAGTAAACAAAACGCACCCGAACTATTCATTATAAAGGAA
CUST_187_PI426075208	6.12856	2.61555	6.12856	up	155.847	31.6331	7.35783	4.74229	noncoding	nc-HOXD4-22+	nc-HOXD4-22	HOX cluster	706	chr2	-	176996730	176997436		TACGCAAAGAAACCTTTTAGGAGTAAACAAAACGCACCCGAACTATTCATTATAAAGGAA
CUST_187_PI426075208	6.12856	2.61555	6.12856	up	155.847	31.6331	7.35783	4.74229	noncoding	nc-HOXD4-22+	nc-HOXD4-22	HOX cluster	706	chr2	-	176996730	176997436		TACGCAAAGAAACCTTTTAGGAGTAAACAAAACGCACCCGAACTATTCATTATAAAGGAA
ASHG19A3A014668	11.3485	3.50442	11.3485	up	2114.26	184.28	10.9025	7.39812	noncoding	uc002ukq.2	BC034000	UCSC_knowngene	690	chr2	-	176999570	177001826		GACACAAGAAGCTTGGATGTGAAATAGCACTTCCTTCTGTGTTACAGAATAAAACAATAT
ASHG19A3H0000202	11.8319	3.5646	11.8319	up	788.914	71.5998	9.53531	5.9707	noncoding	nc-HOXD9-16-	nc-HOXD9-16	HOX cluster	558	chr2	+	176984428	176984986		ATTAAGAAAACCCACAAGTTGGAGGGAGGGGGACTTAAAAAGCACATTACAATGTATCTT
ASHG19A3H0000170	17.2314	4.10697	17.2314	up	78.83	5	6.43538	2.32841	noncoding	nc-HOXD10-8-	nc-HOXD10-8	HOX cluster	1788	chr2	+	176974818	176976606		CCTCTCACGGCATTTATCGCTTCAAGTTAAAGAATGTGGTGAGGGCTCTACTGCACTTTA
ASHG19A3H0000169	19.9133	4.31566	19.9133	up	282.22	17.7454	8.1527	3.83704	noncoding	nc-HOXD10-7-	nc-HOXD10-7	HOX cluster	388	chr2	+	176974318	176974706		GGTTTCTAGTAAAATGGAGGTTACAGCTTCAATACACTGTATGAATTCTCCTCTTTGAGG
ASHG19A3A008508	32.7261	5.03237	32.7261	up	394.698	15.1878	8.61624	3.58387	noncoding	AK000839		misc_RNA	1951	chr17	-	46657698	46659621		ATATCTAGATATTCGTTTGATCACAAACTAAAGGCTTGGAGGGGCACGGAGGAGCCGATT
ASHG19A3A047647	36.3543	5.18405	36.3543	up	384.524	13.6257	8.586	3.40195	noncoding	ENST00000505700	AC012531.17	Ensembl	548	chr12	-	54392805	54393794		CCTCGGTCGTGGGCAAGTAGCTTGTTTTTACGTCCCTCAATAAAATTTTTATGAGGATCA
ASHG19A3H0000076	57.7222	5.85105	57.7222	up	1414.88	26.7006	10.3285	4.47743	noncoding	nc-HOXB9-205-	nc-HOXB9-205	HOX cluster	838	chr17	-	46802225	46803063		AGGAAGATGAGGTCGATTTCCTGATTTAAAAAATCGTCCAAGCCCCGTGGTCCAGCTTAA
ASHG19A3H0000077	91.5243	6.51608	91.5243	up	1487.58	18.2545	10.3998	3.88369	noncoding	nc-HOXB9-206-	nc-HOXB9-206	HOX cluster	691	chr17	-	46803175	46803866		GCTGCCATGATCGTTAGCCTCATATTTTCTATCTAGAGCTCTGTAGAGCACTTTAGAAAC
CUST_4_PI426075208	160.757	7.32874	160.757	up	869.719	5.00918	9.66536	2.33662	noncoding	nc-HOXA11-86+	nc-HOXA11-86	HOX cluster	128	chr7	+	27228787	27228915		CGCTTCTTTCCACAGCCTTTGCAGGCGGAATATCGGAATAAAGTGGGTCCAGGCGCCTCT

## Sheet: M2 vs T3
# Condition pairs: M2 vs T3 # Fold Change cut-off: 2.0 This table contains profiling data of all probes in the four HOX loci, targeting 407 discrete transcribed regions (Rinn, Kertesz et al. 2007), LncRNAs and coding transcripts. # Column A: ProbeName, it represents the probe name. # Column B: Fold change, positive value indicates up-regulation and negative value indicates down-regulation. # Colu…
	Fold Change and Regulation				Raw Intensities		Normalized Intensities		Annotations
ProbeName	Fold change([M2] vs [T3])	Log Fold change([M2] vs [T3])	Absolute Fold change([M2] vs [T3])	Regulation([M2] vs [T3])	[M2](raw)	[T3](raw)	[M2](normalized)	[T3](normalized)	type	seqname	GeneSymbol	source	RNAlength	chrom	strand	txStart	txEnd	Xhyb	probeSeq	EntrezID	unigene	GO	ProteinAccession	product
CUST_38_PI426249100	2.34307	1.2284	2.34307	up	141.009	67.4843	7.22069	5.9923	coding	NM_004502_Exon1-	NM_004502	HOX cluster	503	chr17	-	46687880	46688383	NM_004502,	TTTCTAAATATCCAGCCTCAAGTTCGGTTTTCGCTACCGGAGCCTTCCCAGAACAAACTT
ASHG19A3A016629	34.719	5.11765	34.719	up	1293.77	37.0805	10.2145	5.09688	coding	NM_021192	HOXD11	RefSeq_coding	1463	chr2	+	176972083	176974314		CTTCCTCTTCGGTGAATGCAGGTTATTTAAACTTTGGGAAATGTACTTTTAGTCTGTCAT	3237	Hs.421136	GO:0043565|GO:0003700|GO:0030528|GO:0009952|GO:0001658|GO:0060351|GO:0048589|GO:0009953|GO:0042733|GO:0001656|GO:0001759|GO:0007389|GO:0010720|GO:0032332|GO:0009954|GO:0006355|GO:0001501|GO:0006351|GO:0005634	NP_067015	Homeobox D11
ASHG19A3A008504	2.77816	1.47413	2.77816	up	23.007	11.7481	4.78033	3.30619	coding	NM_002146	HOXB3	RefSeq_coding	3627	chr17	-	46626232	46651810		AAACAGATATTCCCCTGGATGAAAGAGTCGAGGCAAACGTCCAAGCTGAAAAACAACTCC	3213	Hs.654560	GO:0043565|GO:0003700|GO:0030528|GO:0001525|GO:0009952|GO:0051216|GO:0060216|GO:0048704|GO:0021615|GO:0007275|GO:0006355|GO:0030878|GO:0005634	NP_002137	Homeobox B3
CUST_57_PI426249100	2.03038	1.02175	2.03038	up	1707.95	722.324	10.59	9.56825	coding	NM_019558_Exon2+	NM_019558	HOX cluster	682	chr2	+	176996044	176996726	NM_019558,	TCTGAGCTAGTGATTTGCCTCAACAACGTAAACTTCCTAATGATTAGCACTTAATAATTG
CUST_52_PI426249100	2.10272	1.07226	2.10272	up	31.6911	19.5656	5.20015	4.12789	coding	NM_002148_Exon1+	NM_002148	HOX cluster	815	chr2	+	176981491	176982306	NM_002148,	TGGATATTTTAGACTGAGTCAGACCTACGCCACCGGGAAAACCCAAGAGTACAATAATAG
ASHG19A3H0000638	2.84252	1.50717	2.84252	up	34.1747	15.8443	5.30009	3.79292	coding	NM_152739_Exon2+	NM_152739	HOX cluster	1403	chr7	+	27202057	27203460		TTATTTGGCAAAAAGTTAAATATCATCTCAACACAACAATTTGGTCAGTAGGCCTTGAGG
CUST_31_PI426249100	28.2189	4.81859	28.2189	up	1356.68	47.1391	10.2756	5.45701	coding	NM_002147_Exon2-	NM_002147	HOX cluster	1199	chr17	-	46668619	46669818	NM_002147,	TGATTCGCTTTTGGTATTTGTTTGTAGCTTTCCTGGAAGTCAAATAAATGTTTCCCCCAC
CUST_49_PI426247286	2.80291	1.48692	2.80291	up	86.1625	36.0784	6.54307	5.05614	coding	NM_152739_intron2-	NM_152739	HOX cluster	1035	chr7	-	27203460	27204496		AAGTTTTACTGCGTGCAATTTTAAGTGACTGTCTGTGCGTCTGTCTGCCAGGGTTCCATT
CUST_70_PI426249100	4.15154	2.05365	4.15154	up	102.911	29.2467	6.79203	4.73839	coding	NM_153631_Exon4-	NM_153631	HOX cluster	2530	chr7	-	27145809	27148339	NM_153632,NM_153631,NM_030661,	GGGAGGGGGAGAGAGCAAGGAGATCGGTATCTTTGTAATAAAACTGCAATTTTATAAATT
CUST_16_PI426249100	77.1309	6.26924	77.1309	up	3798.33	47.2425	11.73	5.46081	coding	NM_018953_Exon2+	NM_018953	HOX cluster	1081	chr12	+	54428061	54429142	NR_003084,NM_018953,	TGACTCTGGGTCCTTCCTGAAACTATATTTTGTCATATCAAATAAAGAGAGAACAGGACT
CUST_51_PI426249100	29.4693	4.88114	29.4693	up	1284.08	43.0978	10.2013	5.32019	coding	NM_021192_Exon2+	NM_021192	HOX cluster	680	chr2	+	176973634	176974314	NM_021192,	CTTCCTCTTCGGTGAATGCAGGTTATTTAAACTTTGGGAAATGTACTTTTAGTCTGTCAT
CUST_12_PI426249100	6.31686	2.65921	6.31686	up	110.317	20.8689	6.88569	4.22649	coding	NM_004503_Exon1+	NM_004503	HOX cluster	512	chr12	+	54422193	54422705	uc.343+,NM_153693,NM_004503,	AAACACCTTAGGACATAACACACAGACCTCAATCGCTCAGGATTTTAGTTCTGAGCAGGG
CUST_34_PI426249100	2.45768	1.29729	2.45768	up	38.3475	19.9729	5.45547	4.15817	coding	NM_018952_Exon3-	NM_018952	HOX cluster	493	chr17	-	46675097	46675590	NM_018952,	AAGAGCAGAAGTGCTCCACTCCGGTCTACCCGTGGATGCAGCGGATGAATTCGTGCAACA
CUST_11_PI426249100	4.56864	2.19176	4.56864	up	2761.99	527.896	11.2777	9.08595	coding	NM_153693_Exon1+	NM_153693	HOX cluster	557	chr12	+	54410641	54411198	NR_003084,NM_153693,NM_014620,	TTGAATTTATATAAAGTATATGTGTGTGTGTGTGGAGCTGAGACAGGCTCGGCAGCGGCA
CUST_30_PI426247286	4.06648	2.02378	4.06648	up	39.4426	13.0174	5.49217	3.46839	coding	NM_002148_intron1+	NM_002148	HOX cluster	1374	chr2	+	176982306	176983681		CCTTCCAAGGCCCACTTCATGTGAGTAATGTTTAATACTAGCATTTTCCAAAGCGGCCTG
ASHG19A3H0000559	13.433	3.74771	13.433	up	320.464	26.2966	8.32639	4.57868	coding	NM_014212_Exon2-	NM_014212	HOX cluster	1237	chr12	-	54368964	54370201		TTCCCTCCAGGTGGAAAGAAACGCTTGGGAAATTTATTTACAAAAATCCAGGCCCCAGCA
ASHG19A3A008520	230.511	7.8487	230.511	up	8522.67	35.54	12.8809	5.03219	coding	NM_006361	HOXB13	RefSeq_coding	3047	chr17	-	46802128	46806111		GCTATCAGAAACTTAAACTTGAGGATTTTCTCTGTTTTTCACTCGCAATAAATTCAGAGC	10481	Hs.66731	GO:0043565|GO:0003700|GO:0030528|GO:0001525|GO:0008544|GO:0060743|GO:0002009|GO:0007275|GO:0060527|GO:0040008|GO:0006355|GO:0009611|GO:0005634|GO:0005667	NP_006352	Homeobox B13
CUST_33_PI426249100	6.85424	2.777	6.85424	up	1534.86	207.271	10.446	7.66899	coding	NM_018952_Exon4-	NM_018952	HOX cluster	936	chr17	-	46673098	46674034	NM_018952,	ATTAATTTTCTATGTGTTGTGTTTGTAGTCTTGTCTTAGCTCTGGACGTGAAATACTTCG
CUST_3_PI426249100	2.16122	1.11185	2.16122	up	30.6734	18.5537	5.1557	4.04385	coding	NM_173860_Exon1+	NM_173860	HOX cluster	610	chr12	+	54348713	54349323	NM_173860,	TAATCTCCTGAATCCCGGGTTTGTGGGGCCGCTGGTAAACATCCACACGGGAGACACCTT
ASHG19A3H0000586	3.75557	1.90903	3.75557	up	66.3053	21.5677	6.18734	4.27831	coding	NM_018952_Exon4+	NM_018952	HOX cluster	936	chr17	+	46673098	46674034		CGAAGTATTTCACGTCCAGAGCTAAGACAAGACTACAAACACAACACATAGAAAATTAAT
CUST_44_PI426249100	380.533	8.57188	380.533	up	8323.78	21.5606	12.8497	4.27786	coding	NM_006361_Exon2-	NM_006361	HOX cluster	2277	chr17	-	46802128	46804405	NM_006361,	GCTATCAGAAACTTAAACTTGAGGATTTTCTCTGTTTTTCACTCGCAATAAATTCAGAGC
ASHG19A3H0000590	2.76692	1.46828	2.76692	up	47.3927	21.501	5.74033	4.27205	coding	NM_004502_Exon2+	NM_004502	HOX cluster	855	chr17	+	46684602	46685457		AATTGCGTTTTATTTTTCCATCCTTTAGATACACACAGAATGTAAAAGGGAGCATGGGGC
CUST_45_PI426249100	2.30949	1.20758	2.30949	up	153.19	73.6432	7.33123	6.12365	coding	NM_006361_Exon1-	NM_006361	HOX cluster	757	chr17	-	46805354	46806111	NM_006361,	AGATGTGTTGCCAGGGAGAACAGAACCCACCAGGTCCCTTTTGGAAGGCAGCATTTGCAG
ASHG19A3H0000577	17.2298	4.10684	17.2298	up	350.599	22.456	8.44729	4.34046	coding	NM_002145_Exon1+	NM_002145	HOX cluster	511	chr17	+	46621882	46622393		AAAGGAGGAGGAGGAGGAATTAATGTCGACTCCTTGATTGATGAAGTTTGAAATGTCTCC
ASHG19A3A008511	2.13368	1.09335	2.13368	up	132.406	69.5896	7.13456	6.04121	coding	NM_004502	HOXB7	RefSeq_coding	1377	chr17	-	46684602	46688383		TTTCTAAATATCCAGCCTCAAGTTCGGTTTTCGCTACCGGAGCCTTCCCAGAACAAACTT	3217	Hs.436181	GO:0005515|GO:0043565|GO:0003700|GO:0030528|GO:0009952|GO:0048704|GO:0007275|GO:0030099|GO:0006355|GO:0006351|GO:0005634	NP_004493	Homeobox B7
CUST_8_PI426249100	127.721	6.99685	127.721	up	3062.96	23.8084	11.4298	4.43294	coding	NM_017409_Exon2+	NM_017409	HOX cluster	1108	chr12	+	54382952	54384060	NM_017409,	TCCCTGTCTGGGAGTTGTGTTATTTAAAGATATTCTGTATGTTGTATCTTTTGCATGTAG
CUST_20_PI426249100	4.03044	2.01094	4.03044	up	16602	3294.29	13.8133	11.8023	coding	NM_014620_Exon4+	NM_014620	HOX cluster	1180	chr12	+	54448633	54449813	NM_153633,NM_014620,	ATTTTAGTGTCGATGTGAAATGCCCCGTGATCAATAATAAACCAGTGGATGTGAATTAGT
ASHG19A3H0000644	2.60814	1.38302	2.60814	up	19.9058	11.0951	4.60052	3.21749	coding	NM_005523_Exon1+	NM_005523	HOX cluster	781	chr7	+	27224054	27224835		AAAAGAAGGGAGGCTGGAGAAATCTGGACCCGAGACGTAGTAAGTACAACTTGGCAAATA
ASHG19A3H0000630	3.69423	1.88527	3.69423	up	97.7677	31.2186	6.72397	4.83869	coding	NM_002141_Exon2+	NM_002141	HOX cluster	1064	chr7	+	27168126	27169190	uc003syl.2,	AATGGAGTTTATTCTTAGCACATGGCTTTCTATGTAGCCACATCACAATTTGTACAGTTC
CUST_53_PI426249100	5.09134	2.34805	5.09134	up	2798.25	479.638	11.2909	8.94286	coding	NM_002148_Exon2+	NM_002148	HOX cluster	988	chr2	+	176983681	176984669	nc-HOXD9-16-,NM_002148,	TGTCCTTTCTGTGCATGTTCTGGTCGCATGTATAATGCAATAAACTCTGGAAATGAGTTC
CUST_14_PI426249100	72.1259	6.17245	72.1259	up	16093.2	197.264	13.7637	7.59122	coding	NM_004503_Exon2+	NM_004503	HOX cluster	1168	chr12	+	54423438	54424606	NM_153693,NM_004503,	TACCCTCCTGTATAAATCCAACCTCTGGGTCCGTTCTCGAATATTTAATAAAACTGATAT
ASHG19A3H0000640	4.65941	2.22015	4.65941	up	199.925	47.6203	7.69182	5.47167	coding	NM_018951_Exon2+	NM_018951	HOX cluster	1582	chr7	+	27210210	27211792		GCTTCATTCCACAGCTTTTATTCTATAAGAACATAAACATCGTCTTTTTCCACGCACAGC
ASHG19A3A048658	8.58038	3.10104	8.58038	up	582.232	68.914	9.12509	6.02405	coding	NM_014212	HOXC11	RefSeq_coding	2100	chr12	+	54366909	54370201		TGCTGGGGCCTGGATTTTTGTAAATAAATTTCCCAAGCGTTTCTTTCCACCTGGAGGGAA	3227	Hs.127562	GO:0003702|GO:0043565|GO:0003700|GO:0009952|GO:0042733|GO:0007492|GO:0001656|GO:0007275|GO:0001759|GO:0009954|GO:0006355|GO:0001501|GO:0005634	NP_055027	Homeobox C11
ASHG19A3H0000575	2.06404	1.04547	2.06404	up	45.1984	27.1743	5.67459	4.62912	coding	NM_002144_Exon1+	NM_002144	HOX cluster	583	chr17	+	46607689	46608272		TGGGTTTCTCTTAACCTTCATCCAGTCGAAGGTCCGGGCCGTGGGGGTGTTAGGTTCTGA
CUST_41_PI426249100	10.2648	3.35963	10.2648	up	460.448	47.1612	8.81817	5.45853	coding	NM_024017_Exon2-	NM_024017	HOX cluster	1972	chr17	-	46698525	46700497	NM_024017,	TTTCTTTGGGGGTGATTGTCTCGCTTGTTTTCAGTTGTCGATTATATGGGAGGGTTCTGG
CUST_13_PI426249100	5.0482	2.33577	5.0482	up	104.938	24.6086	6.81662	4.48086	coding	NM_153693_Exon2+	NM_153693	HOX cluster	346	chr12	+	54422359	54422705	uc.343+,NM_153693,NM_004503,	AAACACCTTAGGACATAACACACAGACCTCAATCGCTCAGGATTTTAGTTCTGAGCAGGG
ASHG19A3A008514	8.58227	3.10136	8.58227	up	449.957	55.0927	8.79001	5.68865	coding	NM_024017	HOXB9	RefSeq_coding	2711	chr17	-	46698525	46703835		TTTCTTTGGGGGTGATTGTCTCGCTTGTTTTCAGTTGTCGATTATATGGGAGGGTTCTGG	3219	Hs.463350	GO:0005515|GO:0043565|GO:0003700|GO:0016563|GO:0009952|GO:0060070|GO:0060326|GO:0048706|GO:0030879|GO:0007275|GO:0045944|GO:0006355|GO:0006351|GO:0005739|GO:0005730|GO:0005634|GO:0005634	NP_076922	Homeobox B9
CUST_77_PI426249100	7.619	2.9296	7.619	up	3976.04	457.982	11.8005	8.87093	coding	NM_002141_Exon2-	NM_002141	HOX cluster	1064	chr7	-	27168126	27169190	NM_002141,	GAACTGTACAAATTGTGATGTGGCTACATAGAAAGCCATGTGCTAAGAATAAACTCCATT
ASHG19A3H0000561	2.01859	1.01335	2.01859	up	49.5931	30.0543	5.79622	4.78287	coding	NM_017409_Exon2-	NM_017409	HOX cluster	1108	chr12	-	54382952	54384060		CTACATGCAAAAGATACAACATACAGAATATCTTTAAATAACACAACTCCCAGACAGGGA
CUST_6_PI426249100	8.45168	3.07924	8.45168	up	604.88	72.2809	9.17714	6.0979	coding	NM_014212_Exon2+	NM_014212	HOX cluster	1237	chr12	+	54368964	54370201	NM_014212,	TGCTGGGGCCTGGATTTTTGTAAATAAATTTCCCAAGCGTTTCTTTCCACCTGGAGGGAA
CUST_67_PI426249100	2.35013	1.23274	2.35013	up	98.0263	48.4229	6.72804	5.4953	coding	NM_153620_Exon1-	NM_153620	HOX cluster	448	chr7	-	27135177	27135625	NM_153620,NM_005522,	TATGGCTCACAGAACTTCAGTGCGCCTTACAGCCCCTACGCGTTAAATCAGGAAGCAGAC
CUST_85_PI426249100	4.90357	2.29383	4.90357	up	1726.22	315.704	10.6043	8.31048	coding	NM_152739_Exon2-	NM_152739	HOX cluster	1403	chr7	-	27202057	27203460	NM_152739,	CCTCAAGGCCTACTGACCAAATTGTTGTGTTGAGATGATATTTAACTTTTTGCCAAATAA
CUST_25_PI426247286	9.3638	3.22709	9.3638	up	164.684	20.5383	7.42968	4.20258	coding	NM_032391_intron2-	NM_032391	HOX cluster	417	chr17	-	46799261	46799679		CTTAATGTTTGTCTCCAATGGGATGGAGTCCTGGCATAAGCAAAATTAATATTGATAACG
CUST_87_PI426249100	37.3553	5.22324	37.3553	up	18644.7	425.619	13.9801	8.75685	coding	NM_018951_Exon2-	NM_018951	HOX cluster	1582	chr7	-	27210210	27211792	NM_153715,NM_018951,	GCTGTGCGTGGAAAAAGACGATGTTTATGTTCTTATAGAATAAAAGCTGTGGAATGAAGC
CUST_10_PI426249100	22.1425	4.46875	22.1425	up	8229.13	329.35	12.8358	8.36707	coding	NM_022658_Exon2+	NM_022658	HOX cluster	1671	chr12	+	54404872	54406543	NM_022658,	CAGCCCTGTTCCTGGTCCAAGTACTTTGTATTGTATACGTGAGTCATAATAATAAAAAGA
CUST_50_PI426249100	-2.17085	-1.11826	2.17085	down	171.638	385.775	7.48596	8.60422	coding	NM_021192_Exon1+	NM_021192	HOX cluster	781	chr2	+	176972083	176972864	NM_021192,	GTCTGACTTCGCTAGCAAGCCTTCGTTCCTTTCCCAACCGTCGTCCTGCCAGATGACTTT
ASHG19A3H0000515	-4.42185	-2.14465	4.42185	down	5.75222	36.8315	2.94347	5.08812	coding	NM_002146_intron3+	NM_002146	HOX cluster	2897	chr17	+	46629994	46632892		ACTGGGGCTCGAATCCATCTTAGGAACTGAAAAGGGAACTGACATCAATAGGGTTTTTTC
CUST_40_PI426247286	-2.72131	-1.4443	2.72131	down	7.19165	31.8462	3.42362	4.86792	coding	NM_153632_intron3-	NM_153632	HOX cluster	1393	chr7	-	27148339	27149733		AAATGAGGGAGTATCACTGTTTTACCCACCAGGAGAGAGGATAGCACCTAGTTCCTACTT
CUST_28_PI426249100	-2.4144	-1.27166	2.4144	down	7.88834	30.1887	3.51777	4.78944	coding	NM_002146_Exon1-	NM_002146	HOX cluster	612	chr17	-	46651198	46651810	NM_002146,	TGAAAACTTTTTTCTCTCAGTTTGGAAGAAGCCCTTCGTCATGAATGGGATCTGCAGAGT
ASHG19A3H0000589	-54.1258	-5.75824	54.1258	down	4097.89	181667	11.8448	17.6031	coding	NM_018952_Exon1+	NM_018952	HOX cluster	111	chr17	+	46682223	46682334		CCCCCTCTCTCGTCCTCTCTCTCTTTTGCTCTATCGAGCTGATACTGAAGTACAAAAATA
ASHG19A3H0000534	-2.51163	-1.32862	2.51163	down	31.3094	96.2737	5.18518	6.5138	coding	NM_006898_intron1-	NM_006898	HOX cluster	4861	chr2	-	177028896	177033758		AGCTATTTCAGAGTATTTCAAAGTCCCAGCTATTCTGCAGTATTAATAGCTATTTCAGAG
CUST_63_PI426249100	-2.06203	-1.04407	2.06203	down	147.483	318.155	7.27915	8.32321	coding	NM_024501_Exon2+	NM_024501	HOX cluster	1096	chr2	+	177054539	177055635	NM_024501,	TCGCTGTTTAGTTACTAGATGAACAAATCCACAGAATGGGTAAAGAGTAGAATCTGAACT
CUST_47_PI426247286	-2.13413	-1.09365	2.13413	down	578.249	1102.91	9.11477	10.2084	coding	NM_024014_intron2-	NM_024014	HOX cluster	1389	chr7	-	27185536	27186926		GAAAACATCTCGCTTGGTATGAAATAATCTCCCATTCAGTATGCTTTGGGCCCCAGACAT
CUST_68_PI426249100	-3.09416	-1.62955	3.09416	down	425.663	1211.56	8.71329	10.3428	coding	NM_006735_Exon2-	NM_006735	HOX cluster	1111	chr7	-	27139973	27141084	NM_006735,	CCTGAGAGCAGTATGAGGCCTGCAAGAAAGTGATCATATAATTGTATCTTCACTTTCTTT
CUST_17_PI426247286	-2.02175	-1.01561	2.02175	down	14.7265	41.0015	4.22953	5.24513	coding	NM_024015_intron2-	NM_024015	HOX cluster	841	chr17	-	46654382	46655224		AACGCTGTGTTCCCTGGAAGAAAGGACTCTCTCTTTCGGGGGCAATAAAACTTTCTCTTT
ASHG19A3H0000605	-2.14923	-1.10382	2.14923	down	20.9683	58.27	4.66512	5.76894	coding	NM_002148_Exon1-	NM_002148	HOX cluster	815	chr2	-	176981491	176982306		CTATTATTGTACTCTTGGGTTTTCCCGGTGGCGTAGGTCTGACTCAGTCTAAAATATCCA
CUST_24_PI426249100	-11.4351	-3.5154	11.4351	down	420.587	4372.26	8.69884	12.2142	coding	NM_002145_Exon1-	NM_002145	HOX cluster	511	chr17	-	46621882	46622393	NM_002145,	GGAGACATTTCAAACTTCATCAATCAAGGAGTCGACATTAATTCCTCCTCCTCCTCCTTT
CUST_3_PI426247286	-4.80131	-2.26343	4.80131	down	5.00297	26.4062	2.32205	4.58548	coding	NM_014212_intron1+	NM_014212	HOX cluster	1256	chr12	+	54367707	54368964		TTTTGAAAATGTTCAAACTATGTGTTCGCGGGTCCTCGAGCAGAAACCCAAGCAACTCTG
ASHG19A3A008503	-13.3438	-3.7381	13.3438	down	382.11	4669.62	8.56821	12.3063	coding	NM_002145	HOXB2	RefSeq_coding	1614	chr17	-	46620020	46622393		GGAGACATTTCAAACTTCATCAATCAAGGAGTCGACATTAATTCCTCCTCCTCCTCCTTT	3212	Hs.514289	GO:0043565|GO:0003700|GO:0030528|GO:0009952|GO:0008015|GO:0009953|GO:0048704|GO:0021612|GO:0002011|GO:0007275|GO:0048857|GO:0006355|GO:0021569|GO:0021570|GO:0005634	NP_002136	Homeobox B2
ASHG19A3H0000518	-2.80653	-1.48879	2.80653	down	138.385	405.438	7.19531	8.6841	coding	NM_002147_intron2+	NM_002147	HOX cluster	663	chr17	+	46669818	46670482		GAAAGCTCCTTTTACTGTTCACCCCTTCTTTGCTAGCGACAGTCTCAAAATTTCAGGGGT
ASHG19A3H0000602	-2.40629	-1.26681	2.40629	down	28.6666	85.4908	5.06815	6.33497	coding	NM_021193_Exon2-	NM_021193	HOX cluster	239	chr2	-	176965249	176965488		TGAGGTTCAGCCTATTGGACAATTCCTTGCGTTTCTGCCTGTTGATGAATTCGTTGACGA
CUST_31_PI426247286	-2.07305	-1.05176	2.07305	down	5.82039	18.9873	3.028	4.07976	coding	NM_014213_intron1+	NM_014213	HOX cluster	347	chr2	+	176988313	176988661		TTATGATAATTCCCCACAAGTTGTGAAAAGCGACCATCCTTGGTGAAATTAATTTAACGA
ASHG19A3H0000533	-2.69978	-1.43284	2.69978	down	186.449	505.888	7.59724	9.03008	coding	NM_014621_intron1-	NM_014621	HOX cluster	540	chr2	-	177016794	177017335		TCCTCAAACACACCCACATACCCCAGGCTTGCGGGATCCCCAAATGTGCTCCTTCTTCTG
ASHG19A3H0000202	10.6098	3.40732	10.6098	up	786.148	73.691	9.53157	6.12425	noncoding	nc-HOXD9-16-	nc-HOXD9-16	HOX cluster	558	chr2	+	176984428	176984986		ATTAAGAAAACCCACAAGTTGGAGGGAGGGGGACTTAAAAAGCACATTACAATGTATCTT
ASHG19A3H0000205	2.74673	1.45772	2.74673	up	16568.1	4805.11	13.8065	12.3487	noncoding	nc-HOXC10-129-	nc-HOXC10-129	HOX cluster	260	chr12	+	54378513	54378773		CTCCACCCCTCTACCTCCCCTGCCGCCCGGGGGGCGCTTCCTTTGTTCGCGGGGAAGGGC
ASHG19A3H0000174	2.60803	1.38296	2.60803	up	38.8736	19.1036	5.47362	4.09066	noncoding	nc-HOXD12-3-	nc-HOXD12-3	HOX cluster	858	chr2	+	176959802	176960660		TATTTGTTCATTCCCAGCACTGATTATCTTCATAATCCATTAGGACAGAATGGTTTTCAG
CUST_187_PI426075208	5.81271	2.53921	5.81271	up	148.249	29.3661	7.28561	4.7464	noncoding	nc-HOXD4-22+	nc-HOXD4-22	HOX cluster	706	chr2	-	176996730	176997436		TACGCAAAGAAACCTTTTAGGAGTAAACAAAACGCACCCGAACTATTCATTATAAAGGAA
CUST_187_PI426075208	5.81271	2.53921	5.81271	up	148.249	29.3661	7.28561	4.7464	noncoding	nc-HOXD4-22+	nc-HOXD4-22	HOX cluster	706	chr2	-	176996730	176997436		TACGCAAAGAAACCTTTTAGGAGTAAACAAAACGCACCCGAACTATTCATTATAAAGGAA
CUST_187_PI426075208	5.81271	2.53921	5.81271	up	148.249	29.3661	7.28561	4.7464	noncoding	nc-HOXD4-22+	nc-HOXD4-22	HOX cluster	706	chr2	-	176996730	176997436		TACGCAAAGAAACCTTTTAGGAGTAAACAAAACGCACCCGAACTATTCATTATAAAGGAA
ASHG19A3H0000162	2.11843	1.083	2.11843	up	43.1211	25.4229	5.61071	4.52772	noncoding	nc-HOXC9-141-	nc-HOXC9-141	HOX cluster	478	chr12	+	54392875	54393353		GACGCCCCACTTAAGTTGTGTAGATCTCTCCTACACTTCTTCAAGCTGGCAAAGAAAGAT
CUST_52_PI426075208	2.20284	1.13937	2.20284	up	102.649	53.5408	6.78852	5.64916	noncoding	nc-HOXB4-174+	nc-HOXB4-174	HOX cluster	338	chr17	+	46666090	46666428		TGTCCCTTAATGAGAAAAAGGGAGTCTTATGACCCCATCCTTGTCCCAAAGATCAGAAGC
CUST_75_PI426075208	2.55842	1.35525	2.55842	up	3302.03	1084.34	11.5361	10.1809	noncoding	nc-HOXB9-204+	nc-HOXB9-204	HOX cluster	198	chr17	+	46800195	46800393		AGGAGAGAAGGTAATGGTGGAATTCTTTCCCTCACTCTCCCCCGACCACTTCGTCCCCTC
ASHG19A3A014670	2.65651	1.40953	2.65651	up	171.267	71.014	7.48203	6.07249	noncoding	ENST00000417086	AC009336.23	Ensembl	984	chr2	-	177040721	177053268		CGACCGGGGGCTGCCTGGGCAAGGGCGGGGCGAGAGGGCAGAACGCCTGCTCTCGGACAG
CUST_186_PI426075208	2.10837	1.07613	2.10837	up	27.358	17.2714	5.00758	3.93145	noncoding	nc-HOXD3-45+	nc-HOXD3-45	HOX cluster	618	chr2	-	177028029	177028647		TATCAGATGCTTTCCCTGAGTTTATTCATTCCGGTAAGTATCCACCACACTCTTGGCCCT
ASHG19A3H0000169	14.9615	3.90318	14.9615	up	263.735	19.9768	8.06161	4.15843	noncoding	nc-HOXD10-7-	nc-HOXD10-7	HOX cluster	388	chr2	+	176974318	176974706		GGTTTCTAGTAAAATGGAGGTTACAGCTTCAATACACTGTATGAATTCTCCTCTTTGAGG
ASHG19A3H0000105	2.23445	1.15992	2.23445	up	209.228	101.722	7.75559	6.59567	noncoding	nc-HOXC10-126-	nc-HOXC10-126	HOX cluster	228	chr12	+	54377223	54377451		ATAACCCCCATGCTGAGGCCACGGTGACCCTGCATATGAAAACACAAAACCATTTCAAAT
ASHG19A3H0000080	4.72991	2.24181	4.72991	up	1199.04	236.239	10.1105	7.86869	noncoding	nc-HOXA13-96-	nc-HOXA13-96	HOX cluster	318	chr7	-	27240358	27240676		TCAGTGTACACTGTGTGTGTGTGTGATGAGTCGTTCTGAGTCTATGGGTCTAAATGCAAA
CUST_117_PI426075208	2.95789	1.56457	2.95789	up	301.941	107.373	8.24157	6.67701	noncoding	nc-HOXC11-115+	nc-HOXC11-115	HOX cluster	298	chr12	-	54365184	54365482		ACAAAAAATTGTAGCTTGTCTCCATATGTAACCCCTAAAATCCATTCCTCCTCAATGCTC
CUST_24_PI426075208	2.12751	1.08917	2.12751	up	115.33	61.6956	6.94401	5.85484	noncoding	nc-HOXA4-62+	nc-HOXA4-62	HOX cluster	148	chr7	+	27171207	27171355		AAGCAACACCTCCACAGAACCGAGCTTTGAAAACAATAACTTCCTATTTCAGAACTATCC
ASHG19A3A014668	13.7892	3.78547	13.7892	up	2050.29	141.088	10.872	7.08652	noncoding	uc002ukq.2	BC034000	UCSC_knowngene	690	chr2	-	176999570	177001826		GACACAAGAAGCTTGGATGTGAAATAGCACTTCCTTCTGTGTTACAGAATAAAACAATAT
CUST_4_PI426075208	7.91324	2.98427	7.91324	up	835.671	104.673	9.62321	6.63894	noncoding	nc-HOXA11-86+	nc-HOXA11-86	HOX cluster	128	chr7	+	27228787	27228915		CGCTTCTTTCCACAGCCTTTGCAGGCGGAATATCGGAATAAAGTGGGTCCAGGCGCCTCT
ASHG19A3H0000076	20.8598	4.38266	20.8598	up	1303.63	61.1191	10.2239	5.84121	noncoding	nc-HOXB9-205-	nc-HOXB9-205	HOX cluster	838	chr17	-	46802225	46803063		AGGAAGATGAGGTCGATTTCCTGATTTAAAAAATCGTCCAAGCCCCGTGGTCCAGCTTAA
ASHG19A3A047647	24.4338	4.61081	24.4338	up	356.891	16.5325	8.4749	3.86409	noncoding	ENST00000505700	AC012531.17	Ensembl	548	chr12	-	54392805	54393794		CCTCGGTCGTGGGCAAGTAGCTTGTTTTTACGTCCCTCAATAAAATTTTTATGAGGATCA
ASHG19A3H0000100	3.13341	1.64774	3.13341	up	1835.39	516.048	10.7023	9.05457	noncoding	nc-HOXC10-121-	nc-HOXC10-121	HOX cluster	248	chr12	+	54373384	54373632		CGCACCCCTCCAACCCACTGCACAAAGCAAAGACCCATAACCTTGACTCAGACTGCTGAT
ASHG19A3H0000192	2.81892	1.49514	2.81892	up	25.8998	12.7704	4.93335	3.43821	noncoding	nc-HOXD4-29-	nc-HOXD4-29	HOX cluster	288	chr2	+	177006956	177007244		AACCTATTGCTGTTGTGGGCCACATAGTCCTGGCCCATTGGGTCTCAGTGTCTGGCACCT
ASHG19A3H0000017	2.02884	1.02066	2.02884	up	43.9049	26.8654	5.63329	4.61263	noncoding	nc-HOXA13-99-	nc-HOXA13-99	HOX cluster	148	chr7	-	27242338	27242486		AAAAAGTCCAGATAAATTTGATCAATAAGGTGCACCATAAATCTCAAGAATTCAGTCCCC
ASHG19A3H0000170	45.2376	5.49945	45.2376	up	433.196	11.2422	8.73714	3.23769	noncoding	nc-HOXD10-8-	nc-HOXD10-8	HOX cluster	1788	chr2	+	176974818	176976606		CCTCTCACGGCATTTATCGCTTCAAGTTAAAGAATGTGGTGAGGGCTCTACTGCACTTTA
ASHG19A3H0000102	3.17917	1.66865	3.17917	up	233.012	79.6156	7.89954	6.23088	noncoding	nc-HOXC10-123-	nc-HOXC10-123	HOX cluster	148	chr12	+	54374923	54375071		GTAGCATCTGTGTGCAAGTGTGTGCAATGTCAAGACGTGAGAGATTCTGCTGGCCGAGCT
ASHG19A3A016637	2.66266	1.41287	2.66266	up	810.511	286.421	9.57744	8.16458	noncoding	ENST00000426615	AC009336.24	Ensembl	658	chr2	+	177042908	177043737		GAAGTAGGCTAAGACTGCTGTTGAACTTGAAGCTAAACTTGAATGCCATTTAAAATAACA
ASHG19A3A034091	3.66638	1.87436	3.66638	up	81.7222	26.6109	6.47224	4.59788	noncoding	NR_002795	HOXA11AS	RefSeq_NR	1628	chr7	+	27225026	27228912		ATTTGCACGGTGACTTGATTACACTCTCTCATTCATGGTCACTTCCGAAGCGCTTTAGTG
ASHG19A3H0000104	2.08408	1.05941	2.08408	up	112.889	61.8202	6.91612	5.85671	noncoding	nc-HOXC10-125-	nc-HOXC10-125	HOX cluster	128	chr12	+	54376743	54376871		AAAAAAGAAAAGGCTGAGGTGGCCAAGGGCCACTTGGCCGTGGGGAAAAGGACCCACCAG
CUST_95_PI426075208	3.18465	1.67113	3.18465	up	6774.72	1770.45	12.5617	10.8906	noncoding	nc-HOXB9-199+	nc-HOXB9-199	HOX cluster	188	chr17	+	46791012	46791200		GGAACTGCTTGCAGGACTACCTGGACTTCCACCTCTGTGAGAAGGCAGTGATTGCTAAAG
CUST_78_PI426075208	3.43246	1.77924	3.43246	up	86.4923	29.7991	6.5482	4.76896	noncoding	nc-HOXA11-84+	nc-HOXA11-84	HOX cluster	708	chr7	+	27225087	27225795		ATTTGCACGGTGACTTGATTACACTCTCTCATTCATGGTCACTTCCGAAGCGCTTTAGTG
ASHG19A3H0000085	5.69498	2.50969	5.69498	up	93.7497	19.9638	6.66623	4.15654	noncoding	nc-HOXA5-68-	nc-HOXA5-68	HOX cluster	648	chr7	-	27183537	27184185		CCGGACCCTGTGATGAAGATTTTCCAGGCTGGATACGTAAGCAAATCAAATCGCAAACTA
ASHG19A3H0000023	3.58047	1.84015	3.58047	up	151.537	47.7678	7.31553	5.47538	noncoding	nc-HOXA4-61-	nc-HOXA4-61	HOX cluster	158	chr7	-	27170427	27170585		GGGGCGCTGCACGTGGGGCACGGGGCGGGGCGCGCGCTGGGCTGGGGAGGAGCGGCTCGA
ASHG19A3H0000172	3.41441	1.77164	3.41441	up	44.0789	16.5562	5.63775	3.86611	noncoding	nc-HOXD11-4-	nc-HOXD11-4	HOX cluster	488	chr2	+	176968082	176968570		AGGAAAGCATATGAACTCAGATCCAGGCCTTAAGACAGAAAACACGGAGGCCGTTTCTTT
CUST_63_PI426075208	2.47913	1.30983	2.47913	up	1084.01	398.081	9.96364	8.65381	noncoding	nc-HOXB9-186+	nc-HOXB9-186	HOX cluster	168	chr17	+	46715352	46715520		TAAAGTCGGGTCTGTATGTGTCAGCATTCCTGTGTGTGAGTGTGTGTGTGAATATGTGCA
ASHG19A3H0000077	105.088	6.71546	105.088	up	1296.48	13.2784	10.2171	3.50159	noncoding	nc-HOXB9-206-	nc-HOXB9-206	HOX cluster	691	chr17	-	46803175	46803866		GCTGCCATGATCGTTAGCCTCATATTTTCTATCTAGAGCTCTGTAGAGCACTTTAGAAAC
ASHG19A3A008508	24.1715	4.59524	24.1715	up	361.016	16.9436	8.49464	3.8994	noncoding	AK000839		misc_RNA	1951	chr17	-	46657698	46659621		ATATCTAGATATTCGTTTGATCACAAACTAAAGGCTTGGAGGGGCACGGAGGAGCCGATT
CUST_18_PI426075208	2.7517	1.46032	2.7517	up	33.6227	16.0953	5.27979	3.81947	noncoding	nc-HOXA1-56+	nc-HOXA1-56	HOX cluster	318	chr7	+	27137277	27137595		AATAGTATTTGTGACTTTGATCCATCCCAAGCATGGTTAAGAGGGAGCACGGGCAGGAAA
CUST_62_PI426075208	2.64433	1.40291	2.64433	up	123.13	53.0187	7.0362	5.63329	noncoding	nc-HOXB9-185+	nc-HOXB9-185	HOX cluster	148	chr17	+	46708159	46708307		TTCCACACCCCCCAAGTGGGGATCTTAATTGTGAAGTAATGAAATCTTCTGCCAAACCTC
ASHG19A3A047643	5.87646	2.55495	5.87646	up	4203.86	620.602	11.8874	9.3325	noncoding	NR_003716	HOTAIR	RefSeq_NR	2337	chr12	-	54356097	54362515		CCTTGTGTAGGTTGTGTGTGTGTGGTGGTTTTATGCATAAATAAAGTTTTACATGTGGTG
ASHG19A3H0000134	3.23409	1.69336	3.23409	up	46.4498	18.2696	5.71202	4.01866	noncoding	nc-HOXC6-240-	nc-HOXC6-240	HOX cluster	288	chr12	+	54412701	54412989		GGGGGCGGGGATGGGGGAAGAAACCTGTTTTTATCAAATTTTTAAAAATACAGTTTGCAT
ASHG19A3H0000134	3.23409	1.69336	3.23409	up	46.4498	18.2696	5.71202	4.01866	noncoding	nc-HOXC6-240-	nc-HOXC6-240	HOX cluster	288	chr12	+	54412701	54412989		GGGGGCGGGGATGGGGGAAGAAACCTGTTTTTATCAAATTTTTAAAAATACAGTTTGCAT
ASHG19A3A009656	2.3105	1.20821	2.3105	up	1388.3	531.431	10.305	9.0968	noncoding	ENST00000489624	COX6B1P2	Ensembl	216	chr17	+	46791091	46791307		TTTGTATGTGAATGGTACCAGCCTGTGTACAAGTCCCTCATTCCCATATCCTGGATCTCA
CUST_177_PI426075208	3.8745	1.95401	3.8745	up	7218.2	1540.32	12.6442	10.6902	noncoding	nc-HOXD1-48+	nc-HOXD1-48	HOX cluster	138	chr2	-	177046473	177046611		AGAGACACTTTTTACTAGCATAATTTATATATATGTGTGTGTGTGTGTGTACTCCACAGG
ASHG19A3H0000059	-2.3175	-1.21257	2.3175	down	5.42953	14.3662	2.42317	3.63574	noncoding	nc-HOXB8-182-	nc-HOXB8-182	HOX cluster	158	chr17	-	46692789	46692947		AAGACTCCAATTGCCTCGTTAAAATCGCGAAATTAACAGCGTGCCTACGCCTGGCGCGTT
CUST_88_PI426075208	-6.15664	-2.62214	6.15664	down	743.117	3996.8	9.46023	12.0824	noncoding	nc-HOXB2-162+	nc-HOXB2-162	HOX cluster	178	chr17	+	46623286	46623464		TTAACTTAGAGCACTCTCAAAGTTCAGATCAGCGTTATGTGTGTGCATGAGTGTGGTGGG
CUST_142_PI426075208	-2.43447	-1.28361	2.43447	down	161.038	405.057	7.39918	8.68279	noncoding	nc-HOXC6-248+	nc-HOXC6-248	HOX cluster	948	chr12	-	54418111	54419059		TTTTATTTGGGGACAATATTTTCCAGAGGTCCTCCTTAGTTGTGTTCTCCCTGTCTCCTC
CUST_142_PI426075208	-2.43447	-1.28361	2.43447	down	161.038	405.057	7.39918	8.68279	noncoding	nc-HOXC6-248+	nc-HOXC6-248	HOX cluster	948	chr12	-	54418111	54419059		TTTTATTTGGGGACAATATTTTCCAGAGGTCCTCCTTAGTTGTGTTCTCCCTGTCTCCTC
CUST_170_PI426075208	-2.46587	-1.3021	2.46587	down	92.186	247.94	6.64298	7.94507	noncoding	nc-HOXD10-8+	nc-HOXD10-8	HOX cluster	1788	chr2	-	176974818	176976606		TAAAGTGCAGTAGAGCCCTCACCACATTCTTTAACTTGAAGCGATAAATGCCGTGAGAGG
ASHG19A3H0000177	-2.0868	-1.0613	2.0868	down	72.8238	170.887	6.31583	7.37712	noncoding	nc-HOXD1-48-	nc-HOXD1-48	HOX cluster	138	chr2	+	177046473	177046611		CCTGTGGAGTACACACACACACACACATATATATAAATTATGCTAGTAAAAAGTGTCTCT
CUST_44_PI426075208	-2.61777	-1.38834	2.61777	down	137.469	377.978	7.18522	8.57356	noncoding	nc-HOXB2-164+	nc-HOXB2-164	HOX cluster	1039	chr17	+	46626206	46627245		TGGGAAAGTTGGAAGGGAACGTGTTTTGTGCCTTTTGGGTTTGAAATGTGTTTTCTTATT
CUST_173_PI426075208	-2.38022	-1.25109	2.38022	down	78.7664	208.02	6.42385	7.67495	noncoding	nc-HOXD11-5+	nc-HOXD11-5	HOX cluster	228	chr2	-	176968692	176968920		ATGAATATTTACAACGGTTCCAGATTTCTCTTCCACCCGCCGGCATCCCGGAAGCCTCCT
CUST_15_PI426075208	-2.09985	-1.07029	2.09985	down	236.804	494.493	7.92012	8.9904	noncoding	nc-HOXA13-97+	nc-HOXA13-97	HOX cluster	348	chr7	+	27241198	27241546		TTTAGCAGTTCTGGGTAAATATTGATTTGCCCCCAGTTTACCTTCTCCCTGACTGGCCAT
ASHG19A3H0000213	-2.35569	-1.23615	2.35569	down	36.9585	104.904	5.40672	6.64287	noncoding	nc-HOXD8-21-	nc-HOXD8-21	HOX cluster	348	chr2	+	176993168	176993516		CGAGCAGGAGAGGGGAAAACACACACACACAACAGAGAACCATTGCATTTATTGGACATT
ASHG19A3H0000107	-12.0346	-3.58912	12.0346	down	1402.74	13805.3	10.321	13.9101	noncoding	nc-HOXC10-128-	nc-HOXC10-128	HOX cluster	158	chr12	+	54378343	54378501		CCACAAACCTCACCCCACTCCCATCCCCAAGGTAAGAAGTGGGAGTCGGGTCCGGGGATA
ASHG19A3A008515	-2.73904	-1.45367	2.73904	down	5.13842	15.7393	2.32756	3.78122	noncoding	ENST00000438772	AC036222.1	Ensembl	595	chr17	-	46710868	46724152		TTCATCAACACGGTGAAGTTTTATTGTATTTCCGGTCCCCAAGATTTATACCCGGGAGGG
CUST_183_PI426075208	-4.15949	-2.05641	4.15949	down	175.422	723.805	7.5157	9.5721	noncoding	nc-HOXD3-42+	nc-HOXD3-42	HOX cluster	178	chr2	-	177026009	177026187		TTTTCAGCCCATTCTCCTAAGTGCACATTTAGCCCCCAAATATTTCCTCCAGCACTCAAT
CUST_167_PI426075208	-2.20474	-1.14061	2.20474	down	17.8142	52.0954	4.46306	5.60368	noncoding	nc-HOXD10-13+	nc-HOXD10-13	HOX cluster	668	chr2	-	176978968	176979636		TAAGGTACTGTTCAAAGCTAACAGCCACTGACCAGCGCCCTGAAATTTGCTTTCTCACAT
ASHG19A3H0000140	-5.23075	-2.38702	5.23075	down	5.29807	28.8747	2.33386	4.72088	noncoding	nc-HOXC6-246-	nc-HOXC6-246	HOX cluster	968	chr12	+	54416901	54417869		TGAGCGTGATGGGGTAGAGATGTTTGGGACCTATTTTACGTTTTAACCTTAAGTCAGAGA
ASHG19A3H0000140	-5.23075	-2.38702	5.23075	down	5.29807	28.8747	2.33386	4.72088	noncoding	nc-HOXC6-246-	nc-HOXC6-246	HOX cluster	968	chr12	+	54416901	54417869		TGAGCGTGATGGGGTAGAGATGTTTGGGACCTATTTTACGTTTTAACCTTAAGTCAGAGA
CUST_87_PI426075208	-5.97943	-2.58001	5.97943	down	191.807	1106.75	7.63452	10.2145	noncoding	nc-HOXB2-161+	nc-HOXB2-161	HOX cluster	418	chr17	+	46622846	46623264		ACAACAGTTAAATCTTGGGAAATGGACAGGAACTCCCAGGCAGACACATAGGAGTGAGAT
CUST_71_PI426075208	-2.2461	-1.16742	2.2461	down	14.8415	45.5246	4.23728	5.4047	noncoding	nc-HOXB9-200+	nc-HOXB9-200	HOX cluster	198	chr17	+	46795419	46795617		TAAAAGTAGCTCTGTGTTTTAAGACCCGTGTTCTACTTGCTGCGATCGGGATAGTTTTTT
ASHG19A3H0000142	-2.82511	-1.49831	2.82511	down	10.8297	44.1948	3.86089	5.3592	noncoding	nc-HOXC6-248-	nc-HOXC6-248	HOX cluster	948	chr12	+	54418111	54419059		GAGGAGACAGGGAGAACACAACTAAGGAGGACCTCTGGAAAATATTGTCCCCAAATAAAA
ASHG19A3H0000142	-2.82511	-1.49831	2.82511	down	10.8297	44.1948	3.86089	5.3592	noncoding	nc-HOXC6-248-	nc-HOXC6-248	HOX cluster	948	chr12	+	54418111	54419059		GAGGAGACAGGGAGAACACAACTAAGGAGGACCTCTGGAAAATATTGTCCCCAAATAAAA
ASHG19A3H0000101	-4.04215	-2.01512	4.04215	down	28.1659	138.628	5.0445	7.05963	noncoding	nc-HOXC10-122-	nc-HOXC10-122	HOX cluster	108	chr12	+	54374593	54374701		ACCACAGCCCCGACTCTAGCTAGAAACCTGACTTACTGGGGGCAACTTAGAAGCAAACCA
CUST_169_PI426075208	-3.19898	-1.67761	3.19898	down	5.01649	18.0551	2.32261	4.00022	noncoding	nc-HOXD10-7+	nc-HOXD10-7	HOX cluster	388	chr2	-	176974318	176974706		CCTCAAAGAGGAGAATTCATACAGTGTATTGAAGCTGTAACCTCCATTTTACTAGAAACC
CUST_137_PI426075208	-3.46122	-1.79128	3.46122	down	257.902	862.543	8.0307	9.82199	noncoding	nc-HOXC6-243+	nc-HOXC6-243	HOX cluster	958	chr12	-	54414121	54415079		ATATAATAAATATATAACACTCCCAAGCCTGGTTTCAGAACACAGCCAACCCAACAAGGT
CUST_137_PI426075208	-3.46122	-1.79128	3.46122	down	257.902	862.543	8.0307	9.82199	noncoding	nc-HOXC6-243+	nc-HOXC6-243	HOX cluster	958	chr12	-	54414121	54415079		ATATAATAAATATATAACACTCCCAAGCCTGGTTTCAGAACACAGCCAACCCAACAAGGT
CUST_153_PI426075208	-2.31565	-1.21142	2.31565	down	14.4037	45.7662	4.20152	5.41294	noncoding	nc-HOXC8-148+	nc-HOXC8-148	HOX cluster	288	chr12	-	54401335	54401623		TGCTACTTTTCACCCTGAGACACATCAAGTCCATGCTCAGTGTAAACTAGCACACACATG
CUST_182_PI426075208	-2.43872	-1.28612	2.43872	down	2013.12	4117.29	10.84	12.1261	noncoding	nc-HOXD3-41+	nc-HOXD3-41	HOX cluster	128	chr2	-	177025459	177025587		GAGCGGCAGCCACCCGCGCCCCCACCCACTCCTGGGTTTCTGCCCAGCCCTCCCAGGCCC
ASHG19A3H0000008	-3.3048	-1.72456	3.3048	down	202.561	664.112	7.71094	9.4355	noncoding	nc-HOXA11-90-	nc-HOXA11-90	HOX cluster	168	chr7	-	27231227	27231395		CTTTGGTGAGACCCTTGATGCTCTTCTCCTGCCTAAAATCCACACAGATGTGAGGCGCAC
ASHG19A3H0000123	-2.1172	-1.08216	2.1172	down	149.694	332.405	7.29874	8.3809	noncoding	nc-HOXC4-152-	nc-HOXC4-152	HOX cluster	229	chr12	+	54407760	54407989		CACCCCTCATCTGTCTAGCTCCTGGTCAATGATTTTCCCAGACCTAGGCCCAGGCCAACT
ASHG19A3H0000031	-2.5646	-1.35874	2.5646	down	213.391	546.359	7.78101	9.13974	noncoding	nc-HOXA6-71-	nc-HOXA6-71	HOX cluster	218	chr7	-	27192547	27192765		GCATGCGCCCTGAACCCAGCCCCAGGCTAGGAAATGGGATTTAAGGTCCCCACCCCGCCT
CUST_69_PI426075208	-2.54561	-1.34801	2.54561	down	258.502	642.516	8.0344	9.38241	noncoding	nc-HOXB9-196+	nc-HOXB9-196	HOX cluster	208	chr17	+	46782504	46782712		AGAGACAGAAATCAAATCTAGGGTGTTCATCTAGAGTCTCCTGCTCCTCCATTCCTGCTT
ASHG19A3H0000197	-3.44866	-1.78604	3.44866	down	5.85493	31.5427	3.06553	4.85157	noncoding	nc-HOXD4-34-	nc-HOXD4-34	HOX cluster	158	chr2	+	177012419	177012577		GTACTGATCGCGGGGAAGTGGTGGGCTAAGGGGCCAAGCCAGCGGAGTGGGCGGATAGAA
ASHG19A3H0000057	-2.35904	-1.2382	2.35904	down	1608.44	3176.22	10.5106	11.7488	noncoding	nc-HOXB5-179-	nc-HOXB5-179	HOX cluster	101	chr17	-	46673010	46673111		TCTCTCCTCAACCCCCAGCCTCTCCATCTTTCCTGAGCCAGAATTCTTCAGCAAAGGCGA
CUST_204_PI426075208	-2.86817	-1.52013	2.86817	down	20.2748	74.8271	4.62359	6.14372	noncoding	nc-HOXD9-18+	nc-HOXD9-18	HOX cluster	178	chr2	-	176986908	176987086		CCACACACACGCTTGCTCACAGCTTGTCGTGTTGTTTAAAACAGGTGGAAGACCTCTGTA
ASHG19A3H0000129	-2.12768	-1.08928	2.12768	down	130.064	292.783	7.11112	8.2004	noncoding	nc-HOXC5-255-	nc-HOXC5-255	HOX cluster	468	chr12	+	54425701	54426169		ATAACGGGCCTTTTCCTCTGCCATGCTCACGTAATATTTGTGGAGGCTTCAATCTTGCTT
ASHG19A3A032595	-3.291	-1.71853	3.291	down	37.2896	145.81	5.41906	7.13758	noncoding	HIT000098379		H-invDB	227	chr7	-	27235768	27235994		ACCTCCTTGACTTTAGAGATTCAGTACTCAATTATTTGGCTCCAGCTGGAGCAAATTTGA
ASHG19A3H0000152	-3.10324	-1.63378	3.10324	down	5.80575	27.4865	3.01044	4.64422	noncoding	nc-HOXC8-147-	nc-HOXC8-147	HOX cluster	208	chr12	+	54400415	54400623		ACTCGGGACAGTCGCATTCCAAGACACAAAGCCCCGGAAGAATAGCTCTCTGGCAGGGTT
ASHG19A3H0000157	-67.519	-6.07722	67.519	down	649.907	36995.1	9.27409	15.3513	noncoding	nc-HOXC9-131-	nc-HOXC9-131	HOX cluster	198	chr12	+	54384395	54384593		ACTGCTGCTGGGGGTCACCCCAAGAGCCCCCCACCCATCCAAGGAAAGGAATAAACTTAA
ASHG19A3H0000122	-2.59748	-1.37711	2.59748	down	23795.4	46490.9	14.3204	15.6975	noncoding	nc-HOXC13-102-	nc-HOXC13-102	HOX cluster	108	chr12	+	54332232	54332340		CCCTACACCCCTTTGCGTCGGCCAAATTCAGCCTCCCCCCCCTCCCTCTCCCTCCCTGGG
ASHG19A3H0000064	-2.50849	-1.32682	2.50849	down	4929.52	10049.3	12.1141	13.4409	noncoding	nc-HOXB9-187-	nc-HOXB9-187	HOX cluster	168	chr17	-	46715907	46716075		TGGCTCTCTGTGAACAAAGCAGGTTTCCTCCTTGCCACTCACCCCCACCCCCCATACCAC
ASHG19A3H0000043	-2.11505	-1.08069	2.11505	down	314.015	641.765	8.30033	9.38102	noncoding	nc-HOXB2-160-	nc-HOXB2-160	HOX cluster	310	chr17	-	46622394	46622704		GGGGCTCATGGTGTCCTGGTCGTGGTCCTCTGGTGTTTTTGAATCAATTAAACCAAATAA
CUST_35_PI426075208	-3.13753	-1.64963	3.13753	down	40.2024	148.512	5.5162	7.16583	noncoding	nc-HOXA7-75+	nc-HOXA7-75	HOX cluster	108	chr7	+	27200477	27200585		GGGTCAGGGAGGCGCGAGCGGTGAGGGTCGGGCAAGCCCCCGCCGATTCCTTGTTTCCCA
ASHG19A3H0000083	-2.17818	-1.12312	2.17818	down	18.5562	53.1733	4.51455	5.63768	noncoding	nc-HOXA1-55-	nc-HOXA1-55	HOX cluster	328	chr7	-	27136777	27137105		AACCTAATAGTAAACAACAATTTAACGACCTCAGCAGCCTCAGGGAAGTAGGGTGATGAG
CUST_26_PI426075208	-2.19876	-1.13669	2.19876	down	25.406	69.6447	4.90644	6.04313	noncoding	nc-HOXA4-64+	nc-HOXA4-64	HOX cluster	138	chr7	+	27178897	27179035		CCTTGGTCCTCAGGGTCCAGTGGGCGCTAGCAGCCCAGGATCCACCTTGCAACCCGGGGG
ASHG19A3H0000053	-2.42162	-1.27597	2.42162	down	10.161	36.3816	3.79159	5.06756	noncoding	nc-HOXB4-175-	nc-HOXB4-175	HOX cluster	148	chr17	-	46667190	46667338		GAAATGAGTGCTCTCAGTTTCTTAAGGCCTCATCGGTCGGGGGTGCCTGATTTTTACCAA
ASHG19A3H0000168	-2.21018	-1.14417	2.21018	down	19.6933	56.7196	4.58882	5.73299	noncoding	nc-HOXD10-14-	nc-HOXD10-14	HOX cluster	258	chr2	+	176980948	176981206		ATCTTTCCTTTGGACCCCTGGGGTGGGATGTCTCAGGGCCCGCGGAATCCGACTCACCTT
CUST_176_PI426075208	-2.72006	-1.44364	2.72006	down	11.246	44.0211	3.90971	5.35335	noncoding	nc-HOXD1-47+	nc-HOXD1-47	HOX cluster	1188	chr2	-	177040097	177041285		TATCCTGCCTTAATTCATATTTGATTGCCTGGACAGAACCACCTAGAATGTCCAGACGAC
CUST_157_PI426075208	-2.67374	-1.41886	2.67374	down	8.57849	35.396	3.60619	5.02505	noncoding	nc-HOXC9-131+	nc-HOXC9-131	HOX cluster	198	chr12	-	54384395	54384593		TTAAGTTTATTCCTTTCCTTGGATGGGTGGGGGGCTCTTGGGGTGACCCCCAGCAGCAGT
ASHG19A3A014666	-4.25855	-2.09036	4.25855	down	14.3825	83.0706	4.19969	6.29006	noncoding	ENST00000440016	AC009336.21	Ensembl	582	chr2	-	176987087	177001741		TCGCTGACTCTCCAGCTTCCGAGCCGCGGGCGGCGAGTCCAGGGCACACGGAGCGGCCGC
ASHG19A3A014666	-4.25855	-2.09036	4.25855	down	14.3825	83.0706	4.19969	6.29006	noncoding	ENST00000440016	AC009336.21	Ensembl	582	chr2	-	176987087	177001741		TCGCTGACTCTCCAGCTTCCGAGCCGCGGGCGGCGAGTCCAGGGCACACGGAGCGGCCGC
ASHG19A3A014666	-4.25855	-2.09036	4.25855	down	14.3825	83.0706	4.19969	6.29006	noncoding	ENST00000440016	AC009336.21	Ensembl	582	chr2	-	176987087	177001741		TCGCTGACTCTCCAGCTTCCGAGCCGCGGGCGGCGAGTCCAGGGCACACGGAGCGGCCGC
ASHG19A3A014666	-4.25855	-2.09036	4.25855	down	14.3825	83.0706	4.19969	6.29006	noncoding	ENST00000440016	AC009336.21	Ensembl	582	chr2	-	176987087	177001741		TCGCTGACTCTCCAGCTTCCGAGCCGCGGGCGGCGAGTCCAGGGCACACGGAGCGGCCGC
CUST_196_PI426075208	-3.23967	-1.69584	3.23967	down	65.8278	237.028	6.17856	7.8744	noncoding	nc-HOXD4-33+	nc-HOXD4-33	HOX cluster	208	chr2	-	177012179	177012387		ATAAAGCAGACACATATAACACACAGAAAAATGACAAGGCCCAGATACCCCACCAATACC

## Sheet: M3 vs T1
# Condition pairs: M3 vs T1 # Fold Change cut-off: 2.0 This table contains profiling data of all probes in the four HOX loci, targeting 407 discrete transcribed regions (Rinn, Kertesz et al. 2007), LncRNAs and coding transcripts. # Column A: ProbeName, it represents the probe name. # Column B: Fold change, positive value indicates up-regulation and negative value indicates down-regulation. # Colu…
	Fold Change and Regulation				Raw Intensities		Normalized Intensities		Annotations
ProbeName	Fold change([M3] vs [T1])	Log Fold change([M3] vs [T1])	Absolute Fold change([M3] vs [T1])	Regulation([M_xiexianghua] vs [T_liangweidong2])	[M3](raw)	[T1](raw)	[M3](normalized)	[T1](normalized)	type	seqname	GeneSymbol	source	RNAlength	chrom	strand	txStart	txEnd	Xhyb	probeSeq	EntrezID	unigene	GO	ProteinAccession	product
CUST_38_PI426249100	3.23762	1.69493	3.23762	up	109.453	41.7152	6.91323	5.21829	coding	NM_004502_Exon1-	NM_004502	HOX cluster	503	chr17	-	46687880	46688383	NM_004502,	TTTCTAAATATCCAGCCTCAAGTTCGGTTTTCGCTACCGGAGCCTTCCCAGAACAAACTT
ASHG19A3A016629	24.1297	4.59274	24.1297	up	1170.39	51.1891	10.1273	5.53458	coding	NM_021192	HOXD11	RefSeq_coding	1463	chr2	+	176972083	176974314		CTTCCTCTTCGGTGAATGCAGGTTATTTAAACTTTGGGAAATGTACTTTTAGTCTGTCAT	3237	Hs.421136	GO:0043565|GO:0003700|GO:0030528|GO:0009952|GO:0001658|GO:0060351|GO:0048589|GO:0009953|GO:0042733|GO:0001656|GO:0001759|GO:0007389|GO:0010720|GO:0032332|GO:0009954|GO:0006355|GO:0001501|GO:0006351|GO:0005634	NP_067015	Homeobox D11
CUST_52_PI426249100	2.22124	1.15137	2.22124	up	49.6367	28.8851	5.82047	4.6691	coding	NM_002148_Exon1+	NM_002148	HOX cluster	815	chr2	+	176981491	176982306	NM_002148,	TGGATATTTTAGACTGAGTCAGACCTACGCCACCGGGAAAACCCAAGAGTACAATAATAG
CUST_64_PI426249100	2.0888	1.06267	2.0888	up	97.6887	57.253	6.75465	5.69198	coding	NM_153620_Exon3-	NM_153620	HOX cluster	1799	chr7	-	27132615	27134414	NM_153620,NM_005522,	AACCTTTTCACCTCCAACTGGATGTTGACGTATATATAAACAGAACTCCCTTCAAAAGCC
CUST_31_PI426249100	16.2122	4.019	16.2122	up	1207.77	77.124	10.1672	6.14821	coding	NM_002147_Exon2-	NM_002147	HOX cluster	1199	chr17	-	46668619	46669818	NM_002147,	TGATTCGCTTTTGGTATTTGTTTGTAGCTTTCCTGGAAGTCAAATAAATGTTTCCCCCAC
CUST_70_PI426249100	4.94442	2.3058	4.94442	up	103.971	26.4373	6.84012	4.53432	coding	NM_153631_Exon4-	NM_153631	HOX cluster	2530	chr7	-	27145809	27148339	NM_153632,NM_153631,NM_030661,	GGGAGGGGGAGAGAGCAAGGAGATCGGTATCTTTGTAATAAAACTGCAATTTTATAAATT
CUST_16_PI426249100	126.859	6.98709	126.859	up	3662.84	30.596	11.7414	4.75433	coding	NM_018953_Exon2+	NM_018953	HOX cluster	1081	chr12	+	54428061	54429142	NR_003084,NM_018953,	TGACTCTGGGTCCTTCCTGAAACTATATTTTGTCATATCAAATAAAGAGAGAACAGGACT
CUST_51_PI426249100	32.8853	5.03937	32.8853	up	1251.08	40.6097	10.2161	5.17674	coding	NM_021192_Exon2+	NM_021192	HOX cluster	680	chr2	+	176973634	176974314	NM_021192,	CTTCCTCTTCGGTGAATGCAGGTTATTTAAACTTTGGGAAATGTACTTTTAGTCTGTCAT
CUST_12_PI426249100	5.66323	2.50163	5.66323	up	104.274	23.361	6.84344	4.34182	coding	NM_004503_Exon1+	NM_004503	HOX cluster	512	chr12	+	54422193	54422705	uc.343+,NM_153693,NM_004503,	AAACACCTTAGGACATAACACACAGACCTCAATCGCTCAGGATTTTAGTTCTGAGCAGGG
CUST_34_PI426249100	2.0893	1.06302	2.0893	up	46.3285	28.7934	5.72694	4.66392	coding	NM_018952_Exon3-	NM_018952	HOX cluster	493	chr17	-	46675097	46675590	NM_018952,	AAGAGCAGAAGTGCTCCACTCCGGTCTACCCGTGGATGCAGCGGATGAATTCGTGCAACA
ASHG19A3H0000555	3.49031	1.80335	3.49031	up	14.6422	5	4.13309	2.32974	coding	NM_017410_Exon2-	NM_017410	HOX cluster	1544	chr12	-	54338783	54340327		AAAAGCCTATTCCTGATGAACATTTCAAAAGAACACTGTTTTGTAATGCACCAGTGGGAA
CUST_19_PI426249100	2.29538	1.19873	2.29538	up	18.4306	11.709	4.45288	3.25415	coding	NM_014620_Exon3+	NM_014620	HOX cluster	445	chr12	+	54447700	54448145	uc.345+,NM_153633,NM_014620,	AAGAATATTCGCAAAATAGCTACATCCCTGAACACAGTCCGGAATATTACGGCCGGACCA
CUST_11_PI426249100	4.74292	2.24577	4.74292	up	2871.74	556.462	11.3961	9.1503	coding	NM_153693_Exon1+	NM_153693	HOX cluster	557	chr12	+	54410641	54411198	NR_003084,NM_153693,NM_014620,	TTGAATTTATATAAAGTATATGTGTGTGTGTGTGGAGCTGAGACAGGCTCGGCAGCGGCA
ASHG19A3H0000559	11.6069	3.53691	11.6069	up	276.539	28.2224	8.16817	4.63126	coding	NM_014212_Exon2-	NM_014212	HOX cluster	1237	chr12	-	54368964	54370201		TTCCCTCCAGGTGGAAAGAAACGCTTGGGAAATTTATTTACAAAAATCCAGGCCCCAGCA
ASHG19A3A008520	273.945	8.09774	273.945	up	8178.56	30.963	12.8684	4.77067	coding	NM_006361	HOXB13	RefSeq_coding	3047	chr17	-	46802128	46806111		GCTATCAGAAACTTAAACTTGAGGATTTTCTCTGTTTTTCACTCGCAATAAATTCAGAGC	10481	Hs.66731	GO:0043565|GO:0003700|GO:0030528|GO:0001525|GO:0008544|GO:0060743|GO:0002009|GO:0007275|GO:0060527|GO:0040008|GO:0006355|GO:0009611|GO:0005634|GO:0005667	NP_006352	Homeobox B13
ASHG19A3H0000562	2.20294	1.13943	2.20294	up	216.649	111.73	7.83443	6.695	coding	NM_022658_Exon1-	NM_022658	HOX cluster	615	chr12	-	54402889	54403504		AAACATGAGGCTGGGAGACGAGTTTTGATTTAAGTGGCCTTGTCCTTCGCTACTGTTAGT
CUST_33_PI426249100	5.80442	2.53715	5.80442	up	1537.66	257.414	10.502	7.9648	coding	NM_018952_Exon4-	NM_018952	HOX cluster	936	chr17	-	46673098	46674034	NM_018952,	ATTAATTTTCTATGTGTTGTGTTTGTAGTCTTGTCTTAGCTCTGGACGTGAAATACTTCG
ASHG19A3H0000639	4.68893	2.22926	4.68893	up	66.2145	18.503	6.21269	3.98343	coding	NM_152739_Exon1+	NM_152739	HOX cluster	653	chr7	+	27204496	27205149		CTCTCATTCTCAGCATTGTTTTCAGAGAAGGCGCCTTCGCTGGGTTGTTTTTCTCTATCA
ASHG19A3H0000501	2.09412	1.06634	2.09412	up	31.3949	20.2056	5.18665	4.12031	coding	NM_017410_intron1-	NM_017410	HOX cluster	5356	chr12	-	54333426	54338783		AACGGGGCCAGAGGATTGCACTGCATAGTGAAGCTCCCTAATGCTTTTCATTTCTGTTAT
ASHG19A3H0000598	2.85813	1.51507	2.85813	up	291.986	114.819	8.24648	6.73141	coding	NM_006361_Exon1+	NM_006361	HOX cluster	757	chr17	+	46805354	46806111		CTGCAAATGCTGCCTTCCAAAAGGGACCTGGTGGGTTCTGTTCTCCCTGGCAACACATCT
ASHG19A3H0000586	3.50475	1.80931	3.50475	up	60.5482	22.5267	6.09327	4.28396	coding	NM_018952_Exon4+	NM_018952	HOX cluster	936	chr17	+	46673098	46674034		CGAAGTATTTCACGTCCAGAGCTAAGACAAGACTACAAACACAACACATAGAAAATTAAT
CUST_44_PI426249100	290.83	8.18403	290.83	up	7549.49	26.9901	12.7508	4.56673	coding	NM_006361_Exon2-	NM_006361	HOX cluster	2277	chr17	-	46802128	46804405	NM_006361,	GCTATCAGAAACTTAAACTTGAGGATTTTCTCTGTTTTTCACTCGCAATAAATTCAGAGC
CUST_79_PI426249100	5.0519	2.33683	5.0519	up	72.435	18.7473	6.34017	4.00335	coding	NM_019102_Exon2-	NM_019102	HOX cluster	709	chr7	-	27180995	27181704	NM_019102,	CGTGGAAGTGTTCCTGTCTCAATAGCTCCAAGCTGTTAAAGATATTTTTATTCAAACTAC
ASHG19A3H0000577	21.3482	4.41604	21.3482	up	338.988	19.1133	8.45025	4.0342	coding	NM_002145_Exon1+	NM_002145	HOX cluster	511	chr17	+	46621882	46622393		AAAGGAGGAGGAGGAGGAATTAATGTCGACTCCTTGATTGATGAAGTTTGAAATGTCTCC
CUST_8_PI426249100	69.6767	6.1226	69.6767	up	3004.37	45.0475	11.4601	5.33748	coding	NM_017409_Exon2+	NM_017409	HOX cluster	1108	chr12	+	54382952	54384060	NM_017409,	TCCCTGTCTGGGAGTTGTGTTATTTAAAGATATTCTGTATGTTGTATCTTTTGCATGTAG
CUST_20_PI426249100	4.33627	2.11646	4.33627	up	16378.6	3125.61	13.8331	11.7166	coding	NM_014620_Exon4+	NM_014620	HOX cluster	1180	chr12	+	54448633	54449813	NM_153633,NM_014620,	ATTTTAGTGTCGATGTGAAATGCCCCGTGATCAATAATAAACCAGTGGATGTGAATTAGT
ASHG19A3H0000630	3.9178	1.97004	3.9178	up	111.65	35.3466	6.94023	4.97019	coding	NM_002141_Exon2+	NM_002141	HOX cluster	1064	chr7	+	27168126	27169190	uc003syl.2,	AATGGAGTTTATTCTTAGCACATGGCTTTCTATGTAGCCACATCACAATTTGTACAGTTC
CUST_53_PI426249100	5.49643	2.45849	5.49643	up	2715.67	460.577	11.315	8.85649	coding	NM_002148_Exon2+	NM_002148	HOX cluster	988	chr2	+	176983681	176984669	nc-HOXD9-16-,NM_002148,	TGTCCTTTCTGTGCATGTTCTGGTCGCATGTATAATGCAATAAACTCTGGAAATGAGTTC
CUST_14_PI426249100	63.6873	5.99293	63.6873	up	15529.5	226.212	13.7554	7.76249	coding	NM_004503_Exon2+	NM_004503	HOX cluster	1168	chr12	+	54423438	54424606	NM_153693,NM_004503,	TACCCTCCTGTATAAATCCAACCTCTGGGTCCGTTCTCGAATATTTAATAAAACTGATAT
ASHG19A3H0000640	4.50991	2.1731	4.50991	up	189.928	49.7636	7.66242	5.48932	coding	NM_018951_Exon2+	NM_018951	HOX cluster	1582	chr7	+	27210210	27211792		GCTTCATTCCACAGCTTTTATTCTATAAGAACATAAACATCGTCTTTTTCCACGCACAGC
ASHG19A3A048658	9.11198	3.18777	9.11198	up	602.29	71.512	9.21983	6.03207	coding	NM_014212	HOXC11	RefSeq_coding	2100	chr12	+	54366909	54370201		TGCTGGGGCCTGGATTTTTGTAAATAAATTTCCCAAGCGTTTCTTTCCACCTGGAGGGAA	3227	Hs.127562	GO:0003702|GO:0043565|GO:0003700|GO:0009952|GO:0042733|GO:0007492|GO:0001656|GO:0007275|GO:0001759|GO:0009954|GO:0006355|GO:0001501|GO:0005634	NP_055027	Homeobox C11
CUST_41_PI426249100	7.91264	2.98416	7.91264	up	431.972	60.9418	8.77471	5.79055	coding	NM_024017_Exon2-	NM_024017	HOX cluster	1972	chr17	-	46698525	46700497	NM_024017,	TTTCTTTGGGGGTGATTGTCTCGCTTGTTTTCAGTTGTCGATTATATGGGAGGGTTCTGG
CUST_13_PI426249100	5.26589	2.39668	5.26589	up	109.09	26.0769	6.90806	4.51139	coding	NM_153693_Exon2+	NM_153693	HOX cluster	346	chr12	+	54422359	54422705	uc.343+,NM_153693,NM_004503,	AAACACCTTAGGACATAACACACAGACCTCAATCGCTCAGGATTTTAGTTCTGAGCAGGG
ASHG19A3A008514	7.60114	2.92622	7.60114	up	390.582	58.3217	8.64792	5.7217	coding	NM_024017	HOXB9	RefSeq_coding	2711	chr17	-	46698525	46703835		TTTCTTTGGGGGTGATTGTCTCGCTTGTTTTCAGTTGTCGATTATATGGGAGGGTTCTGG	3219	Hs.463350	GO:0005515|GO:0043565|GO:0003700|GO:0016563|GO:0009952|GO:0060070|GO:0060326|GO:0048706|GO:0030879|GO:0007275|GO:0045944|GO:0006355|GO:0006351|GO:0005739|GO:0005730|GO:0005634|GO:0005634	NP_076922	Homeobox B9
CUST_77_PI426249100	6.99478	2.80628	6.99478	up	3629.9	479.876	11.7295	8.92326	coding	NM_002141_Exon2-	NM_002141	HOX cluster	1064	chr7	-	27168126	27169190	NM_002141,	GAACTGTACAAATTGTGATGTGGCTACATAGAAAGCCATGTGCTAAGAATAAACTCCATT
ASHG19A3H0000561	2.16792	1.11631	2.16792	up	35.1993	21.7121	5.34215	4.22584	coding	NM_017409_Exon2-	NM_017409	HOX cluster	1108	chr12	-	54382952	54384060		CTACATGCAAAAGATACAACATACAGAATATCTTTAAATAACACAACTCCCAGACAGGGA
CUST_6_PI426249100	7.659	2.93716	7.659	up	582.54	81.281	9.16847	6.23131	coding	NM_014212_Exon2+	NM_014212	HOX cluster	1237	chr12	+	54368964	54370201	NM_014212,	TGCTGGGGCCTGGATTTTTGTAAATAAATTTCCCAAGCGTTTCTTTCCACCTGGAGGGAA
ASHG19A3A016630	2.7412	1.45481	2.7412	up	97.0686	43.7374	6.747	5.29219	coding	NM_002148	HOXD10	RefSeq_coding	1814	chr2	+	176981491	176984669		TGGATATTTTAGACTGAGTCAGACCTACGCCACCGGGAAAACCCAAGAGTACAATAATAG	3236	Hs.123070	GO:0003702|GO:0003682|GO:0043565|GO:0003700|GO:0008344|GO:0009952|GO:0030326|GO:0048704|GO:0035136|GO:0035137|GO:0007275|GO:0050905|GO:0048935|GO:0045944|GO:0009954|GO:0006355|GO:0007519|GO:0001501|GO:0021520|GO:0005634	NP_002139	Homeobox D10
CUST_85_PI426249100	5.1965	2.37754	5.1965	up	1699.49	315.689	10.6497	8.27214	coding	NM_152739_Exon2-	NM_152739	HOX cluster	1403	chr7	-	27202057	27203460	NM_152739,	CCTCAAGGCCTACTGACCAAATTGTTGTGTTGAGATGATATTTAACTTTTTGCCAAATAA
CUST_25_PI426247286	2.77875	1.47443	2.77875	up	45.0559	21.5477	5.68865	4.21422	coding	NM_032391_intron2-	NM_032391	HOX cluster	417	chr17	-	46799261	46799679		CTTAATGTTTGTCTCCAATGGGATGGAGTCCTGGCATAAGCAAAATTAATATTGATAACG
CUST_87_PI426249100	39.5015	5.30384	39.5015	up	18888.8	429.185	14.0448	8.74099	coding	NM_018951_Exon2-	NM_018951	HOX cluster	1582	chr7	-	27210210	27211792	NM_153715,NM_018951,	GCTGTGCGTGGAAAAAGACGATGTTTATGTTCTTATAGAATAAAAGCTGTGGAATGAAGC
CUST_18_PI426249100	2.2186	1.14965	2.2186	up	30.1479	18.5178	5.13455	3.9849	coding	NM_153633_Exon1+	NM_153633	HOX cluster	485	chr12	+	54447660	54448145	uc.345+,NM_153633,NM_014620,	AAGAATATTCGCAAAATAGCTACATCCCTGAACACAGTCCGGAATATTACGGCCGGACCA
CUST_10_PI426249100	29.1225	4.86406	29.1225	up	7243.39	235.321	12.6883	7.82427	coding	NM_022658_Exon2+	NM_022658	HOX cluster	1671	chr12	+	54404872	54406543	NM_022658,	CAGCCCTGTTCCTGGTCCAAGTACTTTGTATTGTATACGTGAGTCATAATAATAAAAAGA
CUST_17_PI426249100	-2.35211	-1.23396	2.35211	down	2350.47	4759.98	11.1105	12.3445	coding	NM_014620_Exon2+	NM_014620	HOX cluster	117	chr12	+	54446943	54447060	NM_014620,	AGAAATGACGTCAGAATCATTTGCATCCCGCTGCCTCTACCTGCCTGGTCCAGCTGGGAC
ASHG19A3A048665	-2.62679	-1.3933	2.62679	down	2050.85	4641.19	10.9141	12.3075	coding	NM_014620	HOXC4	RefSeq_coding	2300	chr12	+	54410641	54449813		AGAAATGACGTCAGAATCATTTGCATCCCGCTGCCTCTACCTGCCTGGTCCAGCTGGGAC	3221	Hs.549040	GO:0043565|GO:0003700|GO:0030528|GO:0009952|GO:0051216|GO:0048562|GO:0007275|GO:0006355|GO:0006351|GO:0005634	NP_705897	Homeobox C4
ASHG19A3H0000515	-4.77154	-2.25446	4.77154	down	5.40761	39.2437	2.874	5.12846	coding	NM_002146_intron3+	NM_002146	HOX cluster	2897	chr17	+	46629994	46632892		ACTGGGGCTCGAATCCATCTTAGGAACTGAAAAGGGAACTGACATCAATAGGGTTTTTTC
ASHG19A3H0000558	-2.32001	-1.21413	2.32001	down	17.9857	54.8715	4.41787	5.632	coding	NM_014212_Exon1-	NM_014212	HOX cluster	798	chr12	-	54366909	54367707		ACCGCAGTAGGCGTTGTCGAAGAAACGGTCGAAGGCTTGAGGCAGGACGCTGTTCTTGTT
CUST_63_PI426249100	-2.06818	-1.04836	2.06818	down	151.919	343.987	7.35926	8.40762	coding	NM_024501_Exon2+	NM_024501	HOX cluster	1096	chr2	+	177054539	177055635	NM_024501,	TCGCTGTTTAGTTACTAGATGAACAAATCCACAGAATGGGTAAAGAGTAGAATCTGAACT
CUST_47_PI426247286	-2.04408	-1.03145	2.04408	down	591.16	1126.05	9.19087	10.2223	coding	NM_024014_intron2-	NM_024014	HOX cluster	1389	chr7	-	27185536	27186926		GAAAACATCTCGCTTGGTATGAAATAATCTCCCATTCAGTATGCTTTGGGCCCCAGACAT
CUST_68_PI426249100	-3.27369	-1.71092	3.27369	down	426.438	1324.55	8.7581	10.469	coding	NM_006735_Exon2-	NM_006735	HOX cluster	1111	chr7	-	27139973	27141084	NM_006735,	CCTGAGAGCAGTATGAGGCCTGCAAGAAAGTGATCATATAATTGTATCTTCACTTTCTTT
CUST_23_PI426247286	-2.43726	-1.28526	2.43726	down	59.0061	171.624	6.05859	7.34385	coding	NM_024016_intron2-	NM_024016	HOX cluster	770	chr17	-	46690871	46691642		AGTTTATGGCACTTCTAATAGATCTGAACCACCTCCTACACAACTCTGGTGCTGGTTACC
CUST_17_PI426247286	-2.65506	-1.40874	2.65506	down	14.632	51.4668	4.13236	5.54111	coding	NM_024015_intron2-	NM_024015	HOX cluster	841	chr17	-	46654382	46655224		AACGCTGTGTTCCCTGGAAGAAAGGACTCTCTCTTTCGGGGGCAATAAAACTTTCTCTTT
ASHG19A3H0000510	-3.56603	-1.83432	3.56603	down	14.4273	67.6503	4.11061	5.94493	coding	NM_014620_intron2-	NM_014620	HOX cluster	639	chr12	-	54447060	54447700	uc.345-,	CTGGAGTGGAAAATAATTTTTCTCGCTTTGTCGTTTTTCTGCTCCATAAAGCCCTCCTAC
ASHG19A3A048664	-2.31293	-1.20972	2.31293	down	103.08	270.707	6.82825	8.03797	coding	NM_018953	HOXC5	RefSeq_coding	1613	chr12	+	54426831	54429142	uc.344+,	TATAAGCAGAGCCCCAATATCCCTGCCTATAACATGCAAACTTGTGGGAACTATGGATCG	3221	Hs.549040	GO:0043565|GO:0003700|GO:0030528|GO:0009952|GO:0051216|GO:0048562|GO:0007275|GO:0006355|GO:0006351|GO:0005634	NP_705897	Homeobox C4
CUST_24_PI426249100	-16.5963	-4.05279	16.5963	down	279.188	4432.39	8.18253	12.2353	coding	NM_002145_Exon1-	NM_002145	HOX cluster	511	chr17	-	46621882	46622393	NM_002145,	GGAGACATTTCAAACTTCATCAATCAAGGAGTCGACATTAATTCCTCCTCCTCCTCCTTT
CUST_54_PI426249100	-2.01724	-1.01238	2.01724	down	91.5143	214.175	6.66257	7.67495	coding	NM_014213_Exon1+	NM_014213	HOX cluster	901	chr2	+	176987412	176988313	NM_014213,	ATGTCTTCCAGTGGCACCCTCAGCAACTACTACGTGGACTCGCTTATAGGCCATGAGGGC
ASHG19A3H0000599	-2.11125	-1.0781	2.11125	down	76.949	190.083	6.42259	7.50068	coding	NM_000523_Exon1-	NM_000523	HOX cluster	868	chr2	-	176957531	176958399		CTGGAAAGGAAGATTTCCAAAAGTGGGACCCCTGTGGCTGGTCCTTGGTGCAGTACACCT
ASHG19A3H0000524	-4.03139	-2.01128	4.03139	down	123.508	533.757	7.07831	9.08959	coding	NM_024017_intron2+	NM_024017	HOX cluster	2616	chr17	+	46700497	46703114		AGGCTTCCTCAGCACTTCCAAAGCTCTGCCTACATCAAGTTCCCTCTCAATTTTTCTCTA
CUST_3_PI426247286	-8.27235	-3.0483	8.27235	down	5	48.44	2.39437	5.44266	coding	NM_014212_intron1+	NM_014212	HOX cluster	1256	chr12	+	54367707	54368964		TTTTGAAAATGTTCAAACTATGTGTTCGCGGGTCCTCGAGCAGAAACCCAAGCAACTCTG
ASHG19A3H0000517	-2.17104	-1.11839	2.17104	down	22.0476	61.9575	4.69707	5.81546	coding	NM_024015_intron2+	NM_024015	HOX cluster	841	chr17	+	46654382	46655224		AAAGAGAAAGTTTTATTGCCCCCGAAAGAGAGAGTCCTTTCTTCCAGGGAACACAGCGTT
ASHG19A3H0000627	-2.53784	-1.3436	2.53784	down	20.066	66.3818	4.57248	5.91608	coding	NM_030661_Exon1+	NM_030661	HOX cluster	80	chr7	+	27159134	27159214		CGTTTCATGAGCTGTCTAAAAATCTTCTCTTTTCTGGTCTTAGTTTCTGAACTTCTGAGA
CUST_27_PI426247286	-2.18322	-1.12646	2.18322	down	62.9619	163.942	6.14777	7.27423	coding	NM_000523_intron1+	NM_000523	HOX cluster	807	chr2	+	176958399	176959207		CCTCAGCTAGGTGCTCCGAATATCCCAGCCTAATTTTTCTTGTGCTTTTGTTTGTATCAG
ASHG19A3H0000615	-4.08032	-2.02868	4.08032	down	19.5914	102.452	4.54055	6.56923	coding	NM_024501_Exon1-	NM_024501	HOX cluster	879	chr2	-	177053306	177054185		TTACCTTTCTTAGAGGCATTCCTCTTCACTTTCATCCACTCGAACGTGCTGAAGGCGGCA
ASHG19A3H0000625	-5.56722	-2.47696	5.56722	down	20.2857	142.955	4.58747	7.06442	coding	NM_153632_Exon2+	NM_153632	HOX cluster	162	chr7	+	27149733	27149895		TGGAGCTGCTGGTTTTCTGCTTTGTGTTTTGTCGAGACTCTTTCATCCAGGGGAAGATTT
ASHG19A3A008503	-16.3678	-4.03279	16.3678	down	272.095	4262.13	8.14438	12.1772	coding	NM_002145	HOXB2	RefSeq_coding	1614	chr17	-	46620020	46622393		GGAGACATTTCAAACTTCATCAATCAAGGAGTCGACATTAATTCCTCCTCCTCCTCCTTT	3212	Hs.514289	GO:0043565|GO:0003700|GO:0030528|GO:0009952|GO:0008015|GO:0009953|GO:0048704|GO:0021612|GO:0002011|GO:0007275|GO:0048857|GO:0006355|GO:0021569|GO:0021570|GO:0005634	NP_002136	Homeobox B2
CUST_69_PI426249100	-4.86166	-2.28145	4.86166	down	11.2544	73.0302	3.78037	6.06182	coding	NM_006735_Exon1-	NM_006735	HOX cluster	666	chr7	-	27141728	27142394	uc.212-,NM_006735,	GATACATTTCAAAGTTCATCAATCAAGACCTCGACGCTTTCACACTCGACACTGATTCCT
ASHG19A3H0000602	-3.22094	-1.68748	3.22094	down	24.5011	99.7078	4.84139	6.52887	coding	NM_021193_Exon2-	NM_021193	HOX cluster	239	chr2	-	176965249	176965488		TGAGGTTCAGCCTATTGGACAATTCCTTGCGTTTCTGCCTGTTGATGAATTCGTTGACGA
CUST_22_PI426247286	-5.55751	-2.47444	5.55751	down	15.3076	110.321	4.20174	6.67617	coding	NM_004502_intron2-	NM_004502	HOX cluster	2422	chr17	-	46685457	46687880		GGGAAAATGGGCTTCTTTGCCCATCGCCCATTGACTTCAAATCACATACACGGTATAAGA
ASHG19A3H0000568	-2.76758	-1.46862	2.76758	down	22.4968	79.3839	4.72546	6.19409	coding	NM_018953_Exon1-	NM_018953	HOX cluster	529	chr12	-	54426831	54427360	uc.344-,	CGATCCATAGTTCCCACAAGTTTGCATGTTATAGGCAGGGATATTGGGGCTCTGCTTATA
ASHG19A3H0000533	-2.93612	-1.55391	2.93612	down	165.493	511.601	7.47069	9.0246	coding	NM_014621_intron1-	NM_014621	HOX cluster	540	chr2	-	177016794	177017335		TCCTCAAACACACCCACATACCCCAGGCTTGCGGGATCCCCAAATGTGCTCCTTCTTCTG
ASHG19A3H0000081	2.50406	1.32427	2.50406	up	2657.71	940.577	11.2815	9.95724	noncoding	nc-HOXA1-53-	nc-HOXA1-53	HOX cluster	138	chr7	-	27135887	27136025		GCCCTCTTCCCTTCTCACCTCTCGCCAGTTCATCTTTCATTGAACGGTGGGGAGGGGGCG
ASHG19A3H0000202	11.8814	3.57063	11.8814	up	725.72	65.8366	9.47401	5.90338	noncoding	nc-HOXD9-16-	nc-HOXD9-16	HOX cluster	558	chr2	+	176984428	176984986		ATTAAGAAAACCCACAAGTTGGAGGGAGGGGGACTTAAAAAGCACATTACAATGTATCTT
ASHG19A3H0000205	3.94238	1.97907	3.94238	up	12791.9	2726.68	13.4944	11.5153	noncoding	nc-HOXC10-129-	nc-HOXC10-129	HOX cluster	260	chr12	+	54378513	54378773		CTCCACCCCTCTACCTCCCCTGCCGCCCGGGGGGCGCTTCCTTTGTTCGCGGGGAAGGGC
ASHG19A3H0000181	2.45935	1.29828	2.45935	up	27.1014	15.355	4.98691	3.68863	noncoding	nc-HOXD3-39-	nc-HOXD3-39	HOX cluster	2228	chr2	+	177018599	177020827		TGGGGAAAGAAAACAAAACCTCTATGCACTGGGTCATTAGATAATGACTGAATTTTCTGT
ASHG19A3A008517	2.99383	1.58199	2.99383	up	498.5	176.101	8.96464	7.38265	noncoding	ENST00000474761	CTD-2377D24.2	Ensembl	144	chr17	-	46767842	46767986		TTCCAGAAAATGTTAACATCACTCTGAAGGGATACACAGTTGTGAAGGGCCCCAGAGGAA
ASHG19A3H0000203	2.70633	1.43634	2.70633	up	507.939	197.039	8.98856	7.55222	noncoding	nc-HOXD9-17-	nc-HOXD9-17	HOX cluster	168	chr2	+	176986678	176986846		GTGTGTGAGTGTGGCAGGGGGAGGGGGCCCTCCGATCTGCTCCATCCGTCCGTTTTATTA
CUST_187_PI426075208	5.57928	2.48008	5.57928	up	141.658	31.2363	7.26512	4.78504	noncoding	nc-HOXD4-22+	nc-HOXD4-22	HOX cluster	706	chr2	-	176996730	176997436		TACGCAAAGAAACCTTTTAGGAGTAAACAAAACGCACCCGAACTATTCATTATAAAGGAA
CUST_187_PI426075208	5.57928	2.48008	5.57928	up	141.658	31.2363	7.26512	4.78504	noncoding	nc-HOXD4-22+	nc-HOXD4-22	HOX cluster	706	chr2	-	176996730	176997436		TACGCAAAGAAACCTTTTAGGAGTAAACAAAACGCACCCGAACTATTCATTATAAAGGAA
CUST_187_PI426075208	5.57928	2.48008	5.57928	up	141.658	31.2363	7.26512	4.78504	noncoding	nc-HOXD4-22+	nc-HOXD4-22	HOX cluster	706	chr2	-	176996730	176997436		TACGCAAAGAAACCTTTTAGGAGTAAACAAAACGCACCCGAACTATTCATTATAAAGGAA
ASHG19A3A014670	2.38273	1.25261	2.38273	up	165.902	80.8591	7.47489	6.22228	noncoding	ENST00000417086	AC009336.23	Ensembl	984	chr2	-	177040721	177053268		CGACCGGGGGCTGCCTGGGCAAGGGCGGGGCGAGAGGGCAGAACGCCTGCTCTCGGACAG
ASHG19A3H0000169	12.815	3.67977	12.815	up	245.181	23.0421	7.9986	4.31884	noncoding	nc-HOXD10-7-	nc-HOXD10-7	HOX cluster	388	chr2	+	176974318	176974706		GGTTTCTAGTAAAATGGAGGTTACAGCTTCAATACACTGTATGAATTCTCCTCTTTGAGG
ASHG19A3H0000105	2.88376	1.52795	2.88376	up	199.846	79.8042	7.73033	6.20238	noncoding	nc-HOXC10-126-	nc-HOXC10-126	HOX cluster	228	chr12	+	54377223	54377451		ATAACCCCCATGCTGAGGCCACGGTGACCCTGCATATGAAAACACAAAACCATTTCAAAT
ASHG19A3H0000080	7.7838	2.96048	7.7838	up	1126.94	148.12	10.0767	7.11623	noncoding	nc-HOXA13-96-	nc-HOXA13-96	HOX cluster	318	chr7	-	27240358	27240676		TCAGTGTACACTGTGTGTGTGTGTGATGAGTCGTTCTGAGTCTATGGGTCTAAATGCAAA
CUST_24_PI426075208	2.30658	1.20576	2.30658	up	118.663	61.918	7.02047	5.81472	noncoding	nc-HOXA4-62+	nc-HOXA4-62	HOX cluster	148	chr7	+	27171207	27171355		AAGCAACACCTCCACAGAACCGAGCTTTGAAAACAATAACTTCCTATTTCAGAACTATCC
ASHG19A3A014668	11.8057	3.56141	11.8057	up	1940.48	164.07	10.837	7.27556	noncoding	uc002ukq.2	BC034000	UCSC_knowngene	690	chr2	-	176999570	177001826		GACACAAGAAGCTTGGATGTGAAATAGCACTTCCTTCTGTGTTACAGAATAAAACAATAT
CUST_4_PI426075208	37.7027	5.2366	37.7027	up	878.646	25.9353	9.74016	4.50356	noncoding	nc-HOXA11-86+	nc-HOXA11-86	HOX cluster	128	chr7	+	27228787	27228915		CGCTTCTTTCCACAGCCTTTGCAGGCGGAATATCGGAATAAAGTGGGTCCAGGCGCCTCT
ASHG19A3H0000076	20.0025	4.32211	20.0025	up	1363.21	70.8779	10.3402	6.01813	noncoding	nc-HOXB9-205-	nc-HOXB9-205	HOX cluster	838	chr17	-	46802225	46803063		AGGAAGATGAGGTCGATTTCCTGATTTAAAAAATCGTCCAAGCCCCGTGGTCCAGCTTAA
ASHG19A3A047647	18.5777	4.2155	18.5777	up	344.166	22.1187	8.47277	4.25727	noncoding	ENST00000505700	AC012531.17	Ensembl	548	chr12	-	54392805	54393794		CCTCGGTCGTGGGCAAGTAGCTTGTTTTTACGTCCCTCAATAAAATTTTTATGAGGATCA
ASHG19A3H0000100	2.34249	1.22805	2.34249	up	1839.64	719.453	10.7648	9.53675	noncoding	nc-HOXC10-121-	nc-HOXC10-121	HOX cluster	248	chr12	+	54373384	54373632		CGCACCCCTCCAACCCACTGCACAAAGCAAAGACCCATAACCTTGACTCAGACTGCTGAT
CUST_33_PI426075208	4.33355	2.11555	4.33355	up	22481.3	4251.05	14.2884	12.1728	noncoding	nc-HOXA7-73+	nc-HOXA7-73	HOX cluster	148	chr7	+	27196467	27196615		GCCCCCCCGCCGACTCCTGCTAGTGAGCCCTGGACCAAGCTTGGGATCCTCCCCATCCCT
ASHG19A3H0000017	3.13007	1.64619	3.13007	up	51.9295	21.834	5.88117	4.23497	noncoding	nc-HOXA13-99-	nc-HOXA13-99	HOX cluster	148	chr7	-	27242338	27242486		AAAAAGTCCAGATAAATTTGATCAATAAGGTGCACCATAAATCTCAAGAATTCAGTCCCC
ASHG19A3A008515	2.05557	1.03954	2.05557	up	34.4049	22.3489	5.31014	4.2706	noncoding	ENST00000438772	AC036222.1	Ensembl	595	chr17	-	46710868	46724152		TTCATCAACACGGTGAAGTTTTATTGTATTTCCGGTCCCCAAGATTTATACCCGGGAGGG
CUST_188_PI426075208	2.25426	1.17266	2.25426	up	106.18	57.4459	6.87034	5.69768	noncoding	nc-HOXD4-23+	nc-HOXD4-23	HOX cluster	178	chr2	-	176998758	176998936		GTCTTTATTTGAACACAAATCTATGCTCTTTCCCAGCTACAAAAGGAAACATTTACCTAC
ASHG19A3H0000140	3.46919	1.7946	3.46919	up	14.5652	5	4.12434	2.32974	noncoding	nc-HOXC6-246-	nc-HOXC6-246	HOX cluster	968	chr12	+	54416901	54417869		TGAGCGTGATGGGGTAGAGATGTTTGGGACCTATTTTACGTTTTAACCTTAAGTCAGAGA
ASHG19A3H0000140	3.46919	1.7946	3.46919	up	14.5652	5	4.12434	2.32974	noncoding	nc-HOXC6-246-	nc-HOXC6-246	HOX cluster	968	chr12	+	54416901	54417869		TGAGCGTGATGGGGTAGAGATGTTTGGGACCTATTTTACGTTTTAACCTTAAGTCAGAGA
ASHG19A3H0000170	6.45232	2.68982	6.45232	up	79.1973	16.2621	6.46787	3.77805	noncoding	nc-HOXD10-8-	nc-HOXD10-8	HOX cluster	1788	chr2	+	176974818	176976606		CCTCTCACGGCATTTATCGCTTCAAGTTAAAGAATGTGGTGAGGGCTCTACTGCACTTTA
CUST_71_PI426075208	2.3217	1.21518	2.3217	up	82.3058	44.1679	6.52227	5.30709	noncoding	nc-HOXB9-200+	nc-HOXB9-200	HOX cluster	198	chr17	+	46795419	46795617		TAAAAGTAGCTCTGTGTTTTAAGACCCGTGTTCTACTTGCTGCGATCGGGATAGTTTTTT
ASHG19A3H0000179	2.70519	1.43573	2.70519	up	7845.35	2469.31	12.8062	11.3705	noncoding	nc-HOXD3-37-	nc-HOXD3-37	HOX cluster	168	chr2	+	177017979	177018147		AAATGAAGGTTGGATGCTTTATCCCACTGTGAATTTGGACATTCTCCCCCACTCCACCCC
CUST_200_PI426075208	2.04653	1.03318	2.04653	up	23.7989	16.1362	4.79924	3.76606	noncoding	nc-HOXD8-19+	nc-HOXD8-19	HOX cluster	160	chr2	-	176989526	176989686		TCAGGTCAGCATTTATTAGTAGGAAGCAGTAACATTTACAACTGGTCCTCGGGCAGGAAC
CUST_108_PI426075208	2.1927	1.13271	2.1927	up	19.9584	13.1329	4.56566	3.43295	noncoding	nc-HOXC11-106+	nc-HOXC11-106	HOX cluster	158	chr12	-	54351436	54351594		TCATTCTCACGGGCCTGGGAAACTGGGGCTGAGTGGGACCTCAATGGCTGGTAGCCCCTT
ASHG19A3H0000097	6.04847	2.59657	6.04847	up	453.293	81.9093	8.83836	6.24179	noncoding	nc-HOXC10-118-	nc-HOXC10-118	HOX cluster	118	chr12	+	54371444	54371562		AGGAATGCAACTGAGGGGCCTCTGTACATTTTTGTGTGTGTATGTGTGTGTGACACTTCT
ASHG19A3A016637	2.59225	1.3742	2.59225	up	724.428	281.515	9.47121	8.097	noncoding	ENST00000426615	AC009336.24	Ensembl	658	chr2	+	177042908	177043737		GAAGTAGGCTAAGACTGCTGTTGAACTTGAAGCTAAACTTGAATGCCATTTAAAATAACA
ASHG19A3H0000207	2.57488	1.3645	2.57488	up	78.5402	38.2378	6.45262	5.08812	noncoding	nc-HOXC9-133-	nc-HOXC9-133	HOX cluster	108	chr12	+	54387975	54388083		GAAGAAGACGGCGGCAGCGGGGACTGGGGGCTTCGGGTGGGAACGCCAGGGCTCAGGGCT
ASHG19A3H0000159	2.39878	1.2623	2.39878	up	19.3065	11.7425	4.52146	3.25916	noncoding	nc-HOXC9-137-	nc-HOXC9-137	HOX cluster	558	chr12	+	54389985	54390543		GAATTTAAATCACTAAAAGGAAGGCGCGGGGCAGGGGGAGGGGACGACTCTAACCTGTCT
ASHG19A3A034091	3.03186	1.6002	3.03186	up	77.6989	32.372	6.43819	4.83799	noncoding	NR_002795	HOXA11AS	RefSeq_NR	1628	chr7	+	27225026	27228912		ATTTGCACGGTGACTTGATTACACTCTCTCATTCATGGTCACTTCCGAAGCGCTTTAGTG
CUST_137_PI426075208	2.33268	1.22199	2.33268	up	396.328	182.972	8.6671	7.44511	noncoding	nc-HOXC6-243+	nc-HOXC6-243	HOX cluster	958	chr12	-	54414121	54415079		ATATAATAAATATATAACACTCCCAAGCCTGGTTTCAGAACACAGCCAACCCAACAAGGT
CUST_137_PI426075208	2.33268	1.22199	2.33268	up	396.328	182.972	8.6671	7.44511	noncoding	nc-HOXC6-243+	nc-HOXC6-243	HOX cluster	958	chr12	-	54414121	54415079		ATATAATAAATATATAACACTCCCAAGCCTGGTTTCAGAACACAGCCAACCCAACAAGGT
CUST_95_PI426075208	9.75645	3.28636	9.75645	up	6750.45	617.89	12.59	9.3036	noncoding	nc-HOXB9-199+	nc-HOXB9-199	HOX cluster	188	chr17	+	46791012	46791200		GGAACTGCTTGCAGGACTACCTGGACTTCCACCTCTGTGAGAAGGCAGTGATTGCTAAAG
ASHG19A3H0000082	2.68383	1.42429	2.68383	up	18.6594	10.1278	4.46972	3.04542	noncoding	nc-HOXA1-54-	nc-HOXA1-54	HOX cluster	128	chr7	-	27136437	27136565		GGGCTCCCGGTGCAAAACTGAGTGGGAAAGAGAAAGGGGCGGAGAGCGACGAGAGAGGGA
CUST_78_PI426075208	5.5699	2.47765	5.5699	up	113.119	25.5084	6.95482	4.47717	noncoding	nc-HOXA11-84+	nc-HOXA11-84	HOX cluster	708	chr7	+	27225087	27225795		ATTTGCACGGTGACTTGATTACACTCTCTCATTCATGGTCACTTCCGAAGCGCTTTAGTG
CUST_109_PI426075208	4.83633	2.27391	4.83633	up	68.6027	18.5903	6.26408	3.99017	noncoding	nc-HOXC11-107+	nc-HOXC11-107	HOX cluster	148	chr12	-	54352146	54352294		GTCAGGTGTCAGATACCCAGCGGGGGATGGAGGCATGTGATTTTATCTCCATTCTGCTGG
ASHG19A3H0000085	2.9057	1.53889	2.9057	up	86.4995	37.4035	6.59226	5.05337	noncoding	nc-HOXA5-68-	nc-HOXA5-68	HOX cluster	648	chr7	-	27183537	27184185		CCGGACCCTGTGATGAAGATTTTCCAGGCTGGATACGTAAGCAAATCAAATCGCAAACTA
ASHG19A3H0000023	4.83167	2.27252	4.83167	up	156.644	39.1685	7.3975	5.12498	noncoding	nc-HOXA4-61-	nc-HOXA4-61	HOX cluster	158	chr7	-	27170427	27170585		GGGGCGCTGCACGTGGGGCACGGGGCGGGGCGCGCGCTGGGCTGGGGAGGAGCGGCTCGA
ASHG19A3H0000172	5.21825	2.38357	5.21825	up	46.7058	12.4925	5.7358	3.35223	noncoding	nc-HOXD11-4-	nc-HOXD11-4	HOX cluster	488	chr2	+	176968082	176968570		AGGAAAGCATATGAACTCAGATCCAGGCCTTAAGACAGAAAACACGGAGGCCGTTTCTTT
ASHG19A3H0000077	82.748	6.37065	82.748	up	1187.59	16.2645	10.1489	3.77829	noncoding	nc-HOXB9-206-	nc-HOXB9-206	HOX cluster	691	chr17	-	46803175	46803866		GCTGCCATGATCGTTAGCCTCATATTTTCTATCTAGAGCTCTGTAGAGCACTTTAGAAAC
CUST_118_PI426075208	2.63106	1.39565	2.63106	up	118.564	54.5639	7.01949	5.62384	noncoding	nc-HOXC11-116+	nc-HOXC11-116	HOX cluster	228	chr12	-	54366534	54366762		TCTAGCTGCTGCTCTTTTTTCCCCCAGGATTGGGGGAAGGAGGAGGGCTCTCATGTATGG
ASHG19A3A008508	15.6549	3.96855	15.6549	up	326.304	24.7551	8.39892	4.43038	noncoding	AK000839		misc_RNA	1951	chr17	-	46657698	46659621		ATATCTAGATATTCGTTTGATCACAAACTAAAGGCTTGGAGGGGCACGGAGGAGCCGATT
ASHG19A3A034086	2.09769	1.0688	2.09769	up	1911.06	821.988	10.8162	9.74735	noncoding	uc003syg.2	BC031342	UCSC_knowngene	721	chr7	+	27135742	27139584		TCGCGTTGTCATTGGAACTTCCAAGCCTTTGCTGTTAAGAGCCAGGTTCTTAAATCAACC
ASHG19A3A034086	2.09769	1.0688	2.09769	up	1911.06	821.988	10.8162	9.74735	noncoding	uc003syg.2	BC031342	UCSC_knowngene	721	chr7	+	27135742	27139584		TCGCGTTGTCATTGGAACTTCCAAGCCTTTGCTGTTAAGAGCCAGGTTCTTAAATCAACC
ASHG19A3A047643	4.91349	2.29675	4.91349	up	3980.25	730.026	11.8561	9.55935	noncoding	NR_003716	HOTAIR	RefSeq_NR	2337	chr12	-	54356097	54362515		CCTTGTGTAGGTTGTGTGTGTGTGGTGGTTTTATGCATAAATAAAGTTTTACATGTGGTG
ASHG19A3A009656	2.31532	1.21121	2.31532	up	1290.25	519.256	10.26	9.04876	noncoding	ENST00000489624	COX6B1P2	Ensembl	216	chr17	+	46791091	46791307		TTTGTATGTGAATGGTACCAGCCTGTGTACAAGTCCCTCATTCCCATATCCTGGATCTCA
CUST_177_PI426075208	3.69409	1.88522	3.69409	up	6090.6	1416	12.4531	10.5679	noncoding	nc-HOXD1-48+	nc-HOXD1-48	HOX cluster	138	chr2	-	177046473	177046611		AGAGACACTTTTTACTAGCATAATTTATATATATGTGTGTGTGTGTGTGTACTCCACAGG
ASHG19A3H0000141	-2.28356	-1.19128	2.28356	down	62.9861	171.024	6.14803	7.33932	noncoding	nc-HOXC6-247-	nc-HOXC6-247	HOX cluster	138	chr12	+	54417941	54418079		CAGTGGCACAAAAGGGGCCAGCGGGGCAACCGTTCTTCTCTTGCTCAGAAAAGTGAGACT
ASHG19A3H0000141	-2.28356	-1.19128	2.28356	down	62.9861	171.024	6.14803	7.33932	noncoding	nc-HOXC6-247-	nc-HOXC6-247	HOX cluster	138	chr12	+	54417941	54418079		CAGTGGCACAAAAGGGGCCAGCGGGGCAACCGTTCTTCTCTTGCTCAGAAAAGTGAGACT
CUST_88_PI426075208	-6.31798	-2.65946	6.31798	down	674.703	3894.7	9.37936	12.0388	noncoding	nc-HOXB2-162+	nc-HOXB2-162	HOX cluster	178	chr17	+	46623286	46623464		TTAACTTAGAGCACTCTCAAAGTTCAGATCAGCGTTATGTGTGTGCATGAGTGTGGTGGG
CUST_186_PI426075208	-2.2477	-1.16845	2.2477	down	25.8053	74.0882	4.91842	6.08686	noncoding	nc-HOXD3-45+	nc-HOXD3-45	HOX cluster	618	chr2	-	177028029	177028647		TATCAGATGCTTTCCCTGAGTTTATTCATTCCGGTAAGTATCCACCACACTCTTGGCCCT
ASHG19A3H0000087	-2.10903	-1.07658	2.10903	down	153.12	352.558	7.37208	8.44866	noncoding	nc-HOXB2-161-	nc-HOXB2-161	HOX cluster	418	chr17	-	46622846	46623264		ATCTCACTCCTATGTGTCTGCCTGGGAGTTCCTGTCCATTTCCCAAGATTTAACTGTTGT
CUST_142_PI426075208	-3.31108	-1.7273	3.31108	down	129.794	465.027	7.14546	8.87276	noncoding	nc-HOXC6-248+	nc-HOXC6-248	HOX cluster	948	chr12	-	54418111	54419059		TTTTATTTGGGGACAATATTTTCCAGAGGTCCTCCTTAGTTGTGTTCTCCCTGTCTCCTC
CUST_142_PI426075208	-3.31108	-1.7273	3.31108	down	129.794	465.027	7.14546	8.87276	noncoding	nc-HOXC6-248+	nc-HOXC6-248	HOX cluster	948	chr12	-	54418111	54419059		TTTTATTTGGGGACAATATTTTCCAGAGGTCCTCCTTAGTTGTGTTCTCCCTGTCTCCTC
CUST_209_PI426075208	-2.02515	-1.01803	2.02515	down	3823.46	6597.46	11.8015	12.8196	noncoding	nc-HOXC9-139+	nc-HOXC9-139	HOX cluster	148	chr12	-	54391685	54391833		TGTCAATCAAAAAATCTCCCTCACTAGTTCAAGGAAAAGACAGGAGGTTCCAGTCCCCCT
ASHG19A3H0000177	-2.11504	-1.08068	2.11504	down	68.7366	172.209	6.2678	7.34848	noncoding	nc-HOXD1-48-	nc-HOXD1-48	HOX cluster	138	chr2	+	177046473	177046611		CCTGTGGAGTACACACACACACACACATATATATAAATTATGCTAGTAAAAAGTGTCTCT
CUST_44_PI426075208	-2.73943	-1.45387	2.73943	down	139.876	417.157	7.24729	8.70117	noncoding	nc-HOXB2-164+	nc-HOXB2-164	HOX cluster	1039	chr17	+	46626206	46627245		TGGGAAAGTTGGAAGGGAACGTGTTTTGTGCCTTTTGGGTTTGAAATGTGTTTTCTTATT
CUST_173_PI426075208	-2.30488	-1.20469	2.30488	down	85.7327	229.38	6.58064	7.78534	noncoding	nc-HOXD11-5+	nc-HOXD11-5	HOX cluster	228	chr2	-	176968692	176968920		ATGAATATTTACAACGGTTCCAGATTTCTCTTCCACCCGCCGGCATCCCGGAAGCCTCCT
CUST_15_PI426075208	-2.11579	-1.0812	2.11579	down	287.31	618.511	8.22367	9.30487	noncoding	nc-HOXA13-97+	nc-HOXA13-97	HOX cluster	348	chr7	+	27241198	27241546		TTTAGCAGTTCTGGGTAAATATTGATTTGCCCCCAGTTTACCTTCTCCCTGACTGGCCAT
CUST_16_PI426075208	-3.26155	-1.70556	3.26155	down	84.337	313.936	6.55816	8.26371	noncoding	nc-HOXA13-98+	nc-HOXA13-98	HOX cluster	208	chr7	+	27241728	27241936		TTTTTAAAATTCTCGCCTCTGACTCTGTTCGGCTGCCCAGAATTTTTTGGTGCCTTCGTG
ASHG19A3H0000107	-6.99551	-2.80643	6.99551	down	1370.18	8279.42	10.3471	13.1535	noncoding	nc-HOXC10-128-	nc-HOXC10-128	HOX cluster	158	chr12	+	54378343	54378501		CCACAAACCTCACCCCACTCCCATCCCCAAGGTAAGAAGTGGGAGTCGGGTCCGGGGATA
CUST_202_PI426075208	-2.09746	-1.06865	2.09746	down	4813.57	8463.06	12.1236	13.1922	noncoding	nc-HOXD9-16+	nc-HOXD9-16	HOX cluster	558	chr2	-	176984428	176984986		AAGATACATTGTAATGTGCTTTTTAAGTCCCCCTCCCTCCAACTTGTGGGTTTTCTTAAT
CUST_140_PI426075208	-2.51311	-1.32947	2.51311	down	81.7873	238.079	6.51248	7.84195	noncoding	nc-HOXC6-246+	nc-HOXC6-246	HOX cluster	968	chr12	-	54416901	54417869		TCTCTGACTTAAGGTTAAAACGTAAAATAGGTCCCAAACATCTCTACCCCATCACGCTCA
CUST_140_PI426075208	-2.51311	-1.32947	2.51311	down	81.7873	238.079	6.51248	7.84195	noncoding	nc-HOXC6-246+	nc-HOXC6-246	HOX cluster	968	chr12	-	54416901	54417869		TCTCTGACTTAAGGTTAAAACGTAAAATAGGTCCCAAACATCTCTACCCCATCACGCTCA
ASHG19A3A047650	-2.23193	-1.15829	2.23193	down	4557.42	8561.17	12.0535	13.2118	noncoding	ENST00000513381	RP11-834C11.5	Ensembl	499	chr12	-	54478915	54519614		AGCAATTTTCTCCCTCTCCAGGCCTCTTACAGATGTGAAACAACTGGCAGATCTGACTTT
CUST_87_PI426075208	-5.9277	-2.56747	5.9277	down	188.436	1125.3	7.65226	10.2197	noncoding	nc-HOXB2-161+	nc-HOXB2-161	HOX cluster	418	chr17	+	46622846	46623264		ACAACAGTTAAATCTTGGGAAATGGACAGGAACTCCCAGGCAGACACATAGGAGTGAGAT
ASHG19A3H0000193	-2.35257	-1.23424	2.35257	down	29.2819	86.7973	5.09426	6.32849	noncoding	nc-HOXD4-30-	nc-HOXD4-30	HOX cluster	108	chr2	+	177009879	177009987		GTCAATTCTCTTTTTATTTATGCTCCTTGGTGGGAGCTGAGGGCATCTTTCCCTCTCTCT
ASHG19A3H0000206	-2.40075	-1.26349	2.40075	down	16.4669	52.264	4.30046	5.56395	noncoding	nc-HOXC4-154-	nc-HOXC4-154	HOX cluster	1349	chr12	+	54408830	54410179		CATCTCGCTCATTGCTCCTTGAATTTATTATTCTAATCTCAACCGTAGAGCTGGAATAAT
CUST_107_PI426075208	-2.15735	-1.10926	2.15735	down	23.9304	66.3886	4.80694	5.9162	noncoding	nc-HOXC10-128+	nc-HOXC10-128	HOX cluster	158	chr12	-	54378343	54378501		TATCCCCGGACCCGACTCCCACTTCTTACCTTGGGGATGGGAGTGGGGTGAGGTTTGTGG
CUST_144_PI426075208	-3.0751	-1.62064	3.0751	down	24.7569	96.0778	4.85604	6.47668	noncoding	nc-HOXC6-250+	nc-HOXC6-250	HOX cluster	1518	chr12	-	54419861	54421379		TAGACACCAATGTGAGTTGCTTTTTGCCCTAGAATCCAGCTGTCCTCGAATTCATGGCAT
CUST_144_PI426075208	-3.0751	-1.62064	3.0751	down	24.7569	96.0778	4.85604	6.47668	noncoding	nc-HOXC6-250+	nc-HOXC6-250	HOX cluster	1518	chr12	-	54419861	54421379		TAGACACCAATGTGAGTTGCTTTTTGCCCTAGAATCCAGCTGTCCTCGAATTCATGGCAT
CUST_144_PI426075208	-3.0751	-1.62064	3.0751	down	24.7569	96.0778	4.85604	6.47668	noncoding	nc-HOXC6-250+	nc-HOXC6-250	HOX cluster	1518	chr12	-	54419861	54421379		TAGACACCAATGTGAGTTGCTTTTTGCCCTAGAATCCAGCTGTCCTCGAATTCATGGCAT
ASHG19A3H0000145	-2.12867	-1.08996	2.12867	down	33.6773	89.2089	5.28036	6.37031	noncoding	nc-HOXC6-251-	nc-HOXC6-251	HOX cluster	278	chr12	+	54421441	54421719		CATCCCTACTACATTCAAGACTCTCAGCCACACTCTACTTACTCAGGGGAACAGGTTTTA
ASHG19A3H0000145	-2.12867	-1.08996	2.12867	down	33.6773	89.2089	5.28036	6.37031	noncoding	nc-HOXC6-251-	nc-HOXC6-251	HOX cluster	278	chr12	+	54421441	54421719		CATCCCTACTACATTCAAGACTCTCAGCCACACTCTACTTACTCAGGGGAACAGGTTTTA
ASHG19A3H0000035	-2.59461	-1.37552	2.59461	down	115.377	332.834	6.98149	8.35701	noncoding	nc-HOXA7-75-	nc-HOXA7-75	HOX cluster	108	chr7	-	27200477	27200585		TGGGAAACAAGGAATCGGCGGGGGCTTGCCCGACCCTCACCGCTCGCGCCTCCCTGACCC
ASHG19A3H0000135	-2.37392	-1.24727	2.37392	down	23.9662	72.7826	4.80874	6.05602	noncoding	nc-HOXC6-241-	nc-HOXC6-241	HOX cluster	208	chr12	+	54413201	54413409		CGAAAAAGGGAGCCTTTCTCCTGGAGTAATGTGGGAATCGCCGACCGGTGAGGCCTCTAT
ASHG19A3H0000135	-2.37392	-1.24727	2.37392	down	23.9662	72.7826	4.80874	6.05602	noncoding	nc-HOXC6-241-	nc-HOXC6-241	HOX cluster	208	chr12	+	54413201	54413409		CGAAAAAGGGAGCCTTTCTCCTGGAGTAATGTGGGAATCGCCGACCGGTGAGGCCTCTAT
CUST_182_PI426075208	-2.47715	-1.30868	2.47715	down	2102.19	4501	10.947	12.2557	noncoding	nc-HOXD3-41+	nc-HOXD3-41	HOX cluster	128	chr2	-	177025459	177025587		GAGCGGCAGCCACCCGCGCCCCCACCCACTCCTGGGTTTCTGCCCAGCCCTCCCAGGCCC
ASHG19A3A007736	-2.05516	-1.03925	2.05516	down	24.3996	64.504	4.8357	5.87495	noncoding	NR_033203	LOC404266	RefSeq_NR	452	chr17	+	46669653	46679703		TCTCGATGCGCCGTCGCCGGGTCAGGTTGCTTGTCTGGAGATGGAGCCACTACAGGCGGG
ASHG19A3A007736	-2.05516	-1.03925	2.05516	down	24.3996	64.504	4.8357	5.87495	noncoding	NR_033203	LOC404266	RefSeq_NR	452	chr17	+	46669653	46679703		TCTCGATGCGCCGTCGCCGGGTCAGGTTGCTTGTCTGGAGATGGAGCCACTACAGGCGGG
ASHG19A3H0000008	-2.90142	-1.53676	2.90142	down	267.359	776.212	8.1183	9.65506	noncoding	nc-HOXA11-90-	nc-HOXA11-90	HOX cluster	168	chr7	-	27231227	27231395		CTTTGGTGAGACCCTTGATGCTCTTCTCCTGCCTAAAATCCACACAGATGTGAGGCGCAC
ASHG19A3H0000185	-2.05527	-1.03933	2.05527	down	469.384	920.512	8.88045	9.91978	noncoding	nc-HOXD3-44-	nc-HOXD3-44	HOX cluster	98	chr2	+	177027699	177027797		TCGGGCCTCCACCGCACCACCCTCAGGTCCCGGCCCAGCCAAGAGCGCTTGGGGGAGGGG
ASHG19A3H0000031	-2.10068	-1.07086	2.10068	down	191.094	429.341	7.67088	8.74173	noncoding	nc-HOXA6-71-	nc-HOXA6-71	HOX cluster	218	chr7	-	27192547	27192765		GCATGCGCCCTGAACCCAGCCCCAGGCTAGGAAATGGGATTTAAGGTCCCCACCCCGCCT
CUST_69_PI426075208	-2.38578	-1.25446	2.38578	down	283.549	684.92	8.20488	9.45935	noncoding	nc-HOXB9-196+	nc-HOXB9-196	HOX cluster	208	chr17	+	46782504	46782712		AGAGACAGAAATCAAATCTAGGGTGTTCATCTAGAGTCTCCTGCTCCTCCATTCCTGCTT
ASHG19A3A047646	-2.09406	-1.06631	2.09406	down	147.73	339.91	7.32204	8.38835	noncoding	ENST00000513533	AC012531.16	Ensembl	504	chr12	-	54388991	54390569		GGGACGCCTTAACCAGCCCCTCTCAGTTGCAGATAACCCAATGAATGAAAGTGCAAATTC
ASHG19A3H0000197	-3.15161	-1.65609	3.15161	down	8.28931	36.5839	3.36349	5.01958	noncoding	nc-HOXD4-34-	nc-HOXD4-34	HOX cluster	158	chr2	+	177012419	177012577		GTACTGATCGCGGGGAAGTGGTGGGCTAAGGGGCCAAGCCAGCGGAGTGGGCGGATAGAA
ASHG19A3A048667	-2.8593	-1.51566	2.8593	down	30.0606	107.878	5.13005	6.64571	noncoding	NR_026655	FLJ12825	RefSeq_NR	3942	chr12	+	54452037	54516018		AAGTAAAAAGAAGACGGGTGAAATGTCGACACCAATCTTCCAGGGTTCCTTCTCTCCAAG
CUST_204_PI426075208	-2.479	-1.30976	2.479	down	21.7391	69.4564	4.67823	5.98799	noncoding	nc-HOXD9-18+	nc-HOXD9-18	HOX cluster	178	chr2	-	176986908	176987086		CCACACACACGCTTGCTCACAGCTTGTCGTGTTGTTTAAAACAGGTGGAAGACCTCTGTA
ASHG19A3H0000027	-2.03555	-1.02542	2.03555	down	51.5861	127.848	5.87172	6.89714	noncoding	nc-HOXA4-65-	nc-HOXA4-65	HOX cluster	178	chr7	-	27179247	27179425		TGCAAAAAGATGATTTTTGTGTGCGAATGGGCCTGTGTGTGGGGACCTGGCAGGGCCGCA
CUST_114_PI426075208	-2.44734	-1.29122	2.44734	down	16.2268	52.5811	4.28105	5.57226	noncoding	nc-HOXC11-112+	nc-HOXC11-112	HOX cluster	1118	chr12	-	54361354	54362472		AACTGTTTAAAATACTATCCACCGAACTCTAGATACTGCCAAAGAGAGCCTGCTGTTCCC
ASHG19A3A032595	-2.41032	-1.26922	2.41032	down	46.6157	137.424	5.73373	7.00295	noncoding	HIT000098379		H-invDB	227	chr7	-	27235768	27235994		ACCTCCTTGACTTTAGAGATTCAGTACTCAATTATTTGGCTCCAGCTGGAGCAAATTTGA
ASHG19A3H0000032	-2.89615	-1.53414	2.89615	down	330.11	936.398	8.41504	9.94918	noncoding	nc-HOXA6-72-	nc-HOXA6-72	HOX cluster	1151	chr7	-	27193137	27194288		AGACCCGCAAGAAAGTGAATCTCACTACTACCTACTCCCCTAAAACTACCTATTTTGTGC
ASHG19A3H0000157	-42.0252	-5.39318	42.0252	down	686.723	25028.3	9.40077	14.794	noncoding	nc-HOXC9-131-	nc-HOXC9-131	HOX cluster	198	chr12	+	54384395	54384593		ACTGCTGCTGGGGGTCACCCCAAGAGCCCCCCACCCATCCAAGGAAAGGAATAAACTTAA
CUST_18_PI426075208	-6.31691	-2.65922	6.31691	down	26.5422	206.201	4.95848	7.6177	noncoding	nc-HOXA1-56+	nc-HOXA1-56	HOX cluster	318	chr7	+	27137277	27137595		AATAGTATTTGTGACTTTGATCCATCCCAAGCATGGTTAAGAGGGAGCACGGGCAGGAAA
CUST_80_PI426075208	-2.112	-1.07861	2.112	down	41.3576	108.016	5.56898	6.64758	noncoding	nc-HOXA13-96+	nc-HOXA13-96	HOX cluster	318	chr7	+	27240358	27240676		TTTGCATTTAGACCCATAGACTCAGAACGACTCATCACACACACACACAGTGTACACTGA
ASHG19A3H0000122	-2.65744	-1.41004	2.65744	down	23595.5	47787.3	14.3469	15.7569	noncoding	nc-HOXC13-102-	nc-HOXC13-102	HOX cluster	108	chr12	+	54332232	54332340		CCCTACACCCCTTTGCGTCGGCCAAATTCAGCCTCCCCCCCCTCCCTCTCCCTCCCTGGG
CUST_82_PI426075208	-2.49095	-1.31669	2.49095	down	3303.78	7007.53	11.5924	12.9091	noncoding	nc-HOXA1-54+	nc-HOXA1-54	HOX cluster	128	chr7	+	27136437	27136565		TCCCTCTCTCGTCGCTCTCCGCCCCTTTCTCTTTCCCACTCAGTTTTGCACCGGGAGCCC
CUST_82_PI426075208	-2.49095	-1.31669	2.49095	down	3303.78	7007.53	11.5924	12.9091	noncoding	nc-HOXA1-54+	nc-HOXA1-54	HOX cluster	128	chr7	+	27136437	27136565		TCCCTCTCTCGTCGCTCTCCGCCCCTTTCTCTTTCCCACTCAGTTTTGCACCGGGAGCCC
CUST_124_PI426075208	-4.70053	-2.23282	4.70053	down	23.3073	137.628	4.77229	7.00511	noncoding	nc-HOXC4-153+	nc-HOXC4-153	HOX cluster	519	chr12	-	54408220	54408739		TAGCAATCATAATTCCACGTTTAAAAACGAAACGGGACCTCAGCCATCCCTCGGAGTATG
ASHG19A3H0000064	-2.34951	-1.23236	2.34951	down	5085.11	9886.17	12.1957	13.428	noncoding	nc-HOXB9-187-	nc-HOXB9-187	HOX cluster	168	chr17	-	46715907	46716075		TGGCTCTCTGTGAACAAAGCAGGTTTCCTCCTTGCCACTCACCCCCACCCCCCATACCAC
CUST_35_PI426075208	-2.56679	-1.35996	2.56679	down	48.8606	152.399	5.79961	7.15957	noncoding	nc-HOXA7-75+	nc-HOXA7-75	HOX cluster	108	chr7	+	27200477	27200585		GGGTCAGGGAGGCGCGAGCGGTGAGGGTCGGGCAAGCCCCCGCCGATTCCTTGTTTCCCA
ASHG19A3H0000083	-4.08656	-2.03089	4.08656	down	12.2334	66.4246	3.88655	5.91744	noncoding	nc-HOXA1-55-	nc-HOXA1-55	HOX cluster	328	chr7	-	27136777	27137105		AACCTAATAGTAAACAACAATTTAACGACCTCAGCAGCCTCAGGGAAGTAGGGTGATGAG
CUST_26_PI426075208	-2.72149	-1.4444	2.72149	down	25.2935	86.9915	4.88724	6.33163	noncoding	nc-HOXA4-64+	nc-HOXA4-64	HOX cluster	138	chr7	+	27178897	27179035		CCTTGGTCCTCAGGGTCCAGTGGGCGCTAGCAGCCCAGGATCCACCTTGCAACCCGGGGG
ASHG19A3H0000054	-2.13241	-1.09249	2.13241	down	84.5197	211.043	6.56144	7.65393	noncoding	nc-HOXB4-176-	nc-HOXB4-176	HOX cluster	158	chr17	-	46667810	46667968		CAAGTCTGGACACTTACCCGGTCAATCCCTTCCAGCTTGGCCCAACTTCTTACTGGACTT
CUST_113_PI426075208	-2.25457	-1.17285	2.25457	down	442.644	956.334	8.80794	9.98079	noncoding	nc-HOXC11-111+	nc-HOXC11-111	HOX cluster	698	chr12	-	54360504	54361202		TTATTTTCCTCTCCTTCTTTCTCTCTGTTCATCCCCAGTGCTACCCTGGAGGAAAAGGAT
ASHG19A3H0000139	-2.85739	-1.5147	2.85739	down	19.5512	72.6096	4.53706	6.05175	noncoding	nc-HOXC6-245-	nc-HOXC6-245	HOX cluster	218	chr12	+	54416621	54416839		TTCTTCCTCATGTGACATCCTCTTGAGGCCCTATTCTGGGGGCTGAAAATATTCTGGATA
ASHG19A3H0000139	-2.85739	-1.5147	2.85739	down	19.5512	72.6096	4.53706	6.05175	noncoding	nc-HOXC6-245-	nc-HOXC6-245	HOX cluster	218	chr12	+	54416621	54416839		TTCTTCCTCATGTGACATCCTCTTGAGGCCCTATTCTGGGGGCTGAAAATATTCTGGATA
ASHG19A3H0000063	-2.21696	-1.14858	2.21696	down	104.703	263	6.84909	7.99767	noncoding	nc-HOXB9-186-	nc-HOXB9-186	HOX cluster	168	chr17	-	46715352	46715520		TGCACATATTCACACACACACTCACACACAGGAATGCTGACACATACAGACCCGACTTTA
CUST_157_PI426075208	-2.927	-1.54942	2.927	down	9.97775	40.2944	3.61571	5.16513	noncoding	nc-HOXC9-131+	nc-HOXC9-131	HOX cluster	198	chr12	-	54384395	54384593		TTAAGTTTATTCCTTTCCTTGGATGGGTGGGGGGCTCTTGGGGTGACCCCCAGCAGCAGT
ASHG19A3H0000106	-2.58336	-1.36925	2.58336	down	46.7033	146.855	5.73571	7.10495	noncoding	nc-HOXC10-127-	nc-HOXC10-127	HOX cluster	248	chr12	+	54377713	54377961		ACGGTTCCCCTTATTTCTTCCTTTTATTTAAAAACAACCACAAAAATAGACTGGTCTGTC
ASHG19A3A014666	-2.24072	-1.16396	2.24072	down	16.0907	48.2525	4.27154	5.4355	noncoding	ENST00000440016	AC009336.21	Ensembl	582	chr2	-	176987087	177001741		TCGCTGACTCTCCAGCTTCCGAGCCGCGGGCGGCGAGTCCAGGGCACACGGAGCGGCCGC
ASHG19A3A014666	-2.24072	-1.16396	2.24072	down	16.0907	48.2525	4.27154	5.4355	noncoding	ENST00000440016	AC009336.21	Ensembl	582	chr2	-	176987087	177001741		TCGCTGACTCTCCAGCTTCCGAGCCGCGGGCGGCGAGTCCAGGGCACACGGAGCGGCCGC
ASHG19A3A014666	-2.24072	-1.16396	2.24072	down	16.0907	48.2525	4.27154	5.4355	noncoding	ENST00000440016	AC009336.21	Ensembl	582	chr2	-	176987087	177001741		TCGCTGACTCTCCAGCTTCCGAGCCGCGGGCGGCGAGTCCAGGGCACACGGAGCGGCCGC
ASHG19A3A014666	-2.24072	-1.16396	2.24072	down	16.0907	48.2525	4.27154	5.4355	noncoding	ENST00000440016	AC009336.21	Ensembl	582	chr2	-	176987087	177001741		TCGCTGACTCTCCAGCTTCCGAGCCGCGGGCGGCGAGTCCAGGGCACACGGAGCGGCCGC

## Sheet: M3 vs T2
# Condition pairs: M3 vs T2 # Fold Change cut-off: 2.0 This table contains profiling data of all probes in the four HOX loci, targeting 407 discrete transcribed regions (Rinn, Kertesz et al. 2007), LncRNAs and coding transcripts. # Column A: ProbeName, it represents the probe name. # Column B: Fold change, positive value indicates up-regulation and negative value indicates down-regulation. # Colu…
	Fold Change and Regulation				Raw Intensities		Normalized Intensities		Annotations
ProbeName	Fold change([M3] vs [T21])	Log Fold change([M3] vs [T2])	Absolute Fold change([M3] vs [T21])	Regulation([M3] vs [T2])	[M3](raw)	[T2](raw)	[M3](normalized)	[T2](normalized)	type	seqname	GeneSymbol	source	RNAlength	chrom	strand	txStart	txEnd	Xhyb	probeSeq	EntrezID	unigene	GO	ProteinAccession	product
ASHG19A3A016629	24.5707	4.61887	24.5707	up	1170.39	48.0965	10.1273	5.50845	coding	NM_021192	HOXD11	RefSeq_coding	1463	chr2	+	176972083	176974314		CTTCCTCTTCGGTGAATGCAGGTTATTTAAACTTTGGGAAATGTACTTTTAGTCTGTCAT	3237	Hs.421136	GO:0043565|GO:0003700|GO:0030528|GO:0009952|GO:0001658|GO:0060351|GO:0048589|GO:0009953|GO:0042733|GO:0001656|GO:0001759|GO:0007389|GO:0010720|GO:0032332|GO:0009954|GO:0006355|GO:0001501|GO:0006351|GO:0005634	NP_067015	Homeobox D11
CUST_57_PI426249100	2.04192	1.02993	2.04192	up	1576.16	679.236	10.5387	9.50876	coding	NM_019558_Exon2+	NM_019558	HOX cluster	682	chr2	+	176996044	176996726	NM_019558,	TCTGAGCTAGTGATTTGCCTCAACAACGTAAACTTCCTAATGATTAGCACTTAATAATTG
CUST_52_PI426249100	2.82658	1.49906	2.82658	up	49.6367	21.799	5.82047	4.32141	coding	NM_002148_Exon1+	NM_002148	HOX cluster	815	chr2	+	176981491	176982306	NM_002148,	TGGATATTTTAGACTGAGTCAGACCTACGCCACCGGGAAAACCCAAGAGTACAATAATAG
ASHG19A3H0000638	2.46584	1.30208	2.46584	up	24.1482	13.0937	4.81928	3.51721	coding	NM_152739_Exon2+	NM_152739	HOX cluster	1403	chr7	+	27202057	27203460		TTATTTGGCAAAAAGTTAAATATCATCTCAACACAACAATTTGGTCAGTAGGCCTTGAGG
CUST_31_PI426249100	17.547	4.13315	17.547	up	1207.77	68.1049	10.1672	6.03407	coding	NM_002147_Exon2-	NM_002147	HOX cluster	1199	chr17	-	46668619	46669818	NM_002147,	TGATTCGCTTTTGGTATTTGTTTGTAGCTTTCCTGGAAGTCAAATAAATGTTTCCCCCAC
CUST_49_PI426247286	2.7244	1.44594	2.7244	up	134.902	56.5115	7.19782	5.75188	coding	NM_152739_intron2-	NM_152739	HOX cluster	1035	chr7	-	27203460	27204496		AAGTTTTACTGCGTGCAATTTTAAGTGACTGTCTGTGCGTCTGTCTGCCAGGGTTCCATT
ASHG19A3H0000643	3.60228	1.84891	3.60228	up	91.3538	30.2278	6.65978	4.81087	coding	NM_005523_Exon2+	NM_005523	HOX cluster	1871	chr7	+	27220776	27222647	nc-HOXA10-82+,	ATTTCCACCGTCTTTATTTTCCTTGTGCCCAGTTGCCTGTATAAGTGCTGCAACACACAC
CUST_70_PI426249100	6.35238	2.6673	6.35238	up	103.971	19.7395	6.84012	4.17282	coding	NM_153631_Exon4-	NM_153631	HOX cluster	2530	chr7	-	27145809	27148339	NM_153632,NM_153631,NM_030661,	GGGAGGGGGAGAGAGCAAGGAGATCGGTATCTTTGTAATAAAACTGCAATTTTATAAATT
CUST_16_PI426249100	60.7952	5.92588	60.7952	up	3662.84	58.9215	11.7414	5.81553	coding	NM_018953_Exon2+	NM_018953	HOX cluster	1081	chr12	+	54428061	54429142	NR_003084,NM_018953,	TGACTCTGGGTCCTTCCTGAAACTATATTTTGTCATATCAAATAAAGAGAGAACAGGACT
CUST_84_PI426249100	5.18156	2.37339	5.18156	up	28.7357	7.18925	5.06722	2.69383	coding	NM_006896_Exon1-	NM_006896	HOX cluster	511	chr7	-	27195785	27196296	NM_006896,	TATTATGTGAACGCGCTTTTTAGCAAATATACGGCGGGGGCTTCTCTGTTCCAAAATGCC
ASHG19A3H0000623	2.70055	1.43325	2.70055	up	2625.67	847.036	11.2647	9.83148	coding	NM_153631_Exon4+	NM_153631	HOX cluster	2530	chr7	+	27145809	27148339		AATTTATAAAATTGCAGTTTTATTACAAAGATACCGATCTCCTTGCTCTCTCCCCCTCCC
CUST_51_PI426247286	2.00642	1.00463	2.00642	up	210.362	113.546	7.79701	6.79239	coding	NM_153715_intron2-	NM_153715	HOX cluster	7471	chr7	-	27211792	27219264	NM_018951,	AAATGTCAGCCAGAAAGGGCTATCTGCTCCCTTCGCCAAATTATCCCACAACAATGTCAT
CUST_51_PI426249100	31.4507	4.97502	31.4507	up	1251.08	40.3112	10.2161	5.24109	coding	NM_021192_Exon2+	NM_021192	HOX cluster	680	chr2	+	176973634	176974314	NM_021192,	CTTCCTCTTCGGTGAATGCAGGTTATTTAAACTTTGGGAAATGTACTTTTAGTCTGTCAT
CUST_12_PI426249100	4.17573	2.06203	4.17573	up	104.274	29.6194	6.84344	4.78142	coding	NM_004503_Exon1+	NM_004503	HOX cluster	512	chr12	+	54422193	54422705	uc.343+,NM_153693,NM_004503,	AAACACCTTAGGACATAACACACAGACCTCAATCGCTCAGGATTTTAGTTCTGAGCAGGG
CUST_34_PI426249100	3.21378	1.68427	3.21378	up	46.3285	18.1544	5.72694	4.04267	coding	NM_018952_Exon3-	NM_018952	HOX cluster	493	chr17	-	46675097	46675590	NM_018952,	AAGAGCAGAAGTGCTCCACTCCGGTCTACCCGTGGATGCAGCGGATGAATTCGTGCAACA
CUST_75_PI426249100	2.01924	1.01381	2.01924	up	28.2588	18.0037	5.0434	4.02959	coding	NM_153631_Exon2-	NM_153631	HOX cluster	84	chr7	-	27162177	27162261	NM_153631,	ATTCCCTGAGCGCCTGGAGTTGGAGACAATTCCTGGTTCAGAATTTAAACATCTTTCTAG
ASHG19A3H0000585	2.24747	1.1683	2.24747	up	25.3601	14.8166	4.89056	3.72226	coding	NM_002147_Exon1+	NM_002147	HOX cluster	621	chr17	+	46670482	46671103	uc.416+,	CATAATTTAGCAACTGATAGTCCGGGCCATTTGGATAACGCCCCGAGAAGGAGTTTACAA
CUST_11_PI426249100	4.27118	2.09463	4.27118	up	2871.74	595.561	11.3961	9.30144	coding	NM_153693_Exon1+	NM_153693	HOX cluster	557	chr12	+	54410641	54411198	NR_003084,NM_153693,NM_014620,	TTGAATTTATATAAAGTATATGTGTGTGTGTGTGGAGCTGAGACAGGCTCGGCAGCGGCA
CUST_30_PI426247286	4.25539	2.08929	4.25539	up	54.3303	16.1	5.94312	3.85383	coding	NM_002148_intron1+	NM_002148	HOX cluster	1374	chr2	+	176982306	176983681		CCTTCCAAGGCCCACTTCATGTGAGTAATGTTTAATACTAGCATTTTCCAAAGCGGCCTG
ASHG19A3H0000559	6.10685	2.61043	6.10685	up	276.539	49.7495	8.16817	5.55774	coding	NM_014212_Exon2-	NM_014212	HOX cluster	1237	chr12	-	54368964	54370201		TTCCCTCCAGGTGGAAAGAAACGCTTGGGAAATTTATTTACAAAAATCCAGGCCCCAGCA
ASHG19A3A008520	264.277	8.04591	264.277	up	8178.56	30.4286	12.8684	4.8225	coding	NM_006361	HOXB13	RefSeq_coding	3047	chr17	-	46802128	46806111		GCTATCAGAAACTTAAACTTGAGGATTTTCTCTGTTTTTCACTCGCAATAAATTCAGAGC	10481	Hs.66731	GO:0043565|GO:0003700|GO:0030528|GO:0001525|GO:0008544|GO:0060743|GO:0002009|GO:0007275|GO:0060527|GO:0040008|GO:0006355|GO:0009611|GO:0005634|GO:0005667	NP_006352	Homeobox B13
CUST_5_PI426249100	2.20303	1.13949	2.20303	up	77.6991	41.8644	6.43835	5.29886	coding	NM_014212_Exon1+	NM_014212	HOX cluster	798	chr12	+	54366909	54367707	NM_014212,	AACAAGAACAGCGTCCTGCCTCAAGCCTTCGACCGTTTCTTCGACAACGCCTACTGCGGT
ASHG19A3H0000562	2.51074	1.32811	2.51074	up	216.649	93.6618	7.83443	6.50632	coding	NM_022658_Exon1-	NM_022658	HOX cluster	615	chr12	-	54402889	54403504		AAACATGAGGCTGGGAGACGAGTTTTGATTTAAGTGGCCTTGTCCTTCGCTACTGTTAGT
CUST_33_PI426249100	8.19802	3.03528	8.19802	up	1537.66	177.339	10.502	7.46668	coding	NM_018952_Exon4-	NM_018952	HOX cluster	936	chr17	-	46673098	46674034	NM_018952,	ATTAATTTTCTATGTGTTGTGTTTGTAGTCTTGTCTTAGCTCTGGACGTGAAATACTTCG
CUST_15_PI426247286	2.55022	1.35062	2.55022	up	71.8479	33.8323	6.32849	4.97787	coding	NM_002146_intron3-	NM_002146	HOX cluster	2897	chr17	-	46629994	46632892		GAAAAAACCCTATTGATGTCAGTTCCCTTTTCAGTTCCTAAGATGGATTCGAGCCCCAGT
ASHG19A3H0000639	4.35623	2.12308	4.35623	up	66.2145	18.6353	6.21269	4.08961	coding	NM_152739_Exon1+	NM_152739	HOX cluster	653	chr7	+	27204496	27205149		CTCTCATTCTCAGCATTGTTTTCAGAGAAGGCGCCTTCGCTGGGTTGTTTTTCTCTATCA
CUST_35_PI426247286	2.33248	1.22186	2.33248	up	52.5482	27.5935	5.89655	4.67468	coding	NM_006898_intron2+	NM_006898	HOX cluster	1860	chr2	+	177034383	177036244		TAGTAAAAGCCAGTGTTGAGGCTGCTGCTCCTAGCACTGTGAATACTCAAAATGCTTCCA
ASHG19A3H0000536	6.0577	2.59877	6.0577	up	26.011	5	4.93005	2.33128	coding	NM_024501_intron1-	NM_024501	HOX cluster	353	chr2	-	177054185	177054539		CCTAGGAACAGAATTTGTACCAGGAGAAGTTCCACGGAGAGCTCCTTCCTGAAATTTTCT
ASHG19A3H0000501	2.13929	1.09713	2.13929	up	31.3949	18.6341	5.18665	4.08952	coding	NM_017410_intron1-	NM_017410	HOX cluster	5356	chr12	-	54333426	54338783		AACGGGGCCAGAGGATTGCACTGCATAGTGAAGCTCCCTAATGCTTTTCATTTCTGTTAT
ASHG19A3H0000586	3.40465	1.76751	3.40465	up	60.5482	21.8807	6.09327	4.32576	coding	NM_018952_Exon4+	NM_018952	HOX cluster	936	chr17	+	46673098	46674034		CGAAGTATTTCACGTCCAGAGCTAAGACAAGACTACAAACACAACACATAGAAAATTAAT
CUST_44_PI426249100	392.18	8.61537	392.18	up	7549.49	19.2005	12.7508	4.13539	coding	NM_006361_Exon2-	NM_006361	HOX cluster	2277	chr17	-	46802128	46804405	NM_006361,	GCTATCAGAAACTTAAACTTGAGGATTTTCTCTGTTTTTCACTCGCAATAAATTCAGAGC
ASHG19A3H0000590	2.52092	1.33395	2.52092	up	31.5552	16.1562	5.19375	3.8598	coding	NM_004502_Exon2+	NM_004502	HOX cluster	855	chr17	+	46684602	46685457		AATTGCGTTTTATTTTTCCATCCTTTAGATACACACAGAATGTAAAAGGGAGCATGGGGC
CUST_79_PI426249100	2.4121	1.27029	2.4121	up	72.435	35.9287	6.34017	5.06988	coding	NM_019102_Exon2-	NM_019102	HOX cluster	709	chr7	-	27180995	27181704	NM_019102,	CGTGGAAGTGTTCCTGTCTCAATAGCTCCAAGCTGTTAAAGATATTTTTATTCAAACTAC
ASHG19A3H0000577	16.9475	4.083	16.9475	up	338.988	22.4763	8.45025	4.36724	coding	NM_002145_Exon1+	NM_002145	HOX cluster	511	chr17	+	46621882	46622393		AAAGGAGGAGGAGGAGGAATTAATGTCGACTCCTTGATTGATGAAGTTTGAAATGTCTCC
ASHG19A3A008511	2.04549	1.03245	2.04549	up	119.959	66.7509	7.0359	6.00346	coding	NM_004502	HOXB7	RefSeq_coding	1377	chr17	-	46684602	46688383		TTTCTAAATATCCAGCCTCAAGTTCGGTTTTCGCTACCGGAGCCTTCCCAGAACAAACTT	3217	Hs.436181	GO:0005515|GO:0043565|GO:0003700|GO:0030528|GO:0009952|GO:0048704|GO:0007275|GO:0030099|GO:0006355|GO:0006351|GO:0005634	NP_004493	Homeobox B7
CUST_8_PI426249100	106.769	6.73835	106.769	up	3004.37	28.4243	11.4601	4.72173	coding	NM_017409_Exon2+	NM_017409	HOX cluster	1108	chr12	+	54382952	54384060	NM_017409,	TCCCTGTCTGGGAGTTGTGTTATTTAAAGATATTCTGTATGTTGTATCTTTTGCATGTAG
CUST_20_PI426249100	3.96617	1.98775	3.96617	up	16378.6	3330.13	13.8331	11.8453	coding	NM_014620_Exon4+	NM_014620	HOX cluster	1180	chr12	+	54448633	54449813	NM_153633,NM_014620,	ATTTTAGTGTCGATGTGAAATGCCCCGTGATCAATAATAAACCAGTGGATGTGAATTAGT
ASHG19A3H0000630	5.82991	2.54347	5.82991	up	111.65	22.954	6.94023	4.39676	coding	NM_002141_Exon2+	NM_002141	HOX cluster	1064	chr7	+	27168126	27169190	uc003syl.2,	AATGGAGTTTATTCTTAGCACATGGCTTTCTATGTAGCCACATCACAATTTGTACAGTTC
CUST_53_PI426249100	5.28107	2.40083	5.28107	up	2715.67	460.438	11.315	8.91415	coding	NM_002148_Exon2+	NM_002148	HOX cluster	988	chr2	+	176983681	176984669	nc-HOXD9-16-,NM_002148,	TGTCCTTTCTGTGCATGTTCTGGTCGCATGTATAATGCAATAAACTCTGGAAATGAGTTC
CUST_14_PI426249100	65.2754	6.02847	65.2754	up	15529.5	210.85	13.7554	7.72695	coding	NM_004503_Exon2+	NM_004503	HOX cluster	1168	chr12	+	54423438	54424606	NM_153693,NM_004503,	TACCCTCCTGTATAAATCCAACCTCTGGGTCCGTTCTCGAATATTTAATAAAACTGATAT
ASHG19A3H0000640	4.83077	2.27225	4.83077	up	189.928	44.4952	7.66242	5.39017	coding	NM_018951_Exon2+	NM_018951	HOX cluster	1582	chr7	+	27210210	27211792		GCTTCATTCCACAGCTTTTATTCTATAAGAACATAAACATCGTCTTTTTCCACGCACAGC
ASHG19A3A048658	8.97497	3.16591	8.97497	up	602.29	69.0341	9.21983	6.05393	coding	NM_014212	HOXC11	RefSeq_coding	2100	chr12	+	54366909	54370201		TGCTGGGGCCTGGATTTTTGTAAATAAATTTCCCAAGCGTTTCTTTCCACCTGGAGGGAA	3227	Hs.127562	GO:0003702|GO:0043565|GO:0003700|GO:0009952|GO:0042733|GO:0007492|GO:0001656|GO:0007275|GO:0001759|GO:0009954|GO:0006355|GO:0001501|GO:0005634	NP_055027	Homeobox C11
CUST_41_PI426249100	8.91658	3.15649	8.91658	up	431.972	51.827	8.77471	5.61822	coding	NM_024017_Exon2-	NM_024017	HOX cluster	1972	chr17	-	46698525	46700497	NM_024017,	TTTCTTTGGGGGTGATTGTCTCGCTTGTTTTCAGTTGTCGATTATATGGGAGGGTTCTGG
CUST_13_PI426249100	5.41425	2.43676	5.41425	up	109.09	24.1472	6.90806	4.4713	coding	NM_153693_Exon2+	NM_153693	HOX cluster	346	chr12	+	54422359	54422705	uc.343+,NM_153693,NM_004503,	AAACACCTTAGGACATAACACACAGACCTCAATCGCTCAGGATTTTAGTTCTGAGCAGGG
ASHG19A3A008514	9.50104	3.24809	9.50104	up	390.582	44.751	8.64792	5.39983	coding	NM_024017	HOXB9	RefSeq_coding	2711	chr17	-	46698525	46703835		TTTCTTTGGGGGTGATTGTCTCGCTTGTTTTCAGTTGTCGATTATATGGGAGGGTTCTGG	3219	Hs.463350	GO:0005515|GO:0043565|GO:0003700|GO:0016563|GO:0009952|GO:0060070|GO:0060326|GO:0048706|GO:0030879|GO:0007275|GO:0045944|GO:0006355|GO:0006351|GO:0005739|GO:0005730|GO:0005634|GO:0005634	NP_076922	Homeobox B9
CUST_77_PI426249100	6.79061	2.76354	6.79061	up	3629.9	476.419	11.7295	8.966	coding	NM_002141_Exon2-	NM_002141	HOX cluster	1064	chr7	-	27168126	27169190	NM_002141,	GAACTGTACAAATTGTGATGTGGCTACATAGAAAGCCATGTGCTAAGAATAAACTCCATT
CUST_6_PI426249100	7.64747	2.93498	7.64747	up	582.54	78.0887	9.16847	6.23349	coding	NM_014212_Exon2+	NM_014212	HOX cluster	1237	chr12	+	54368964	54370201	NM_014212,	TGCTGGGGCCTGGATTTTTGTAAATAAATTTCCCAAGCGTTTCTTTCCACCTGGAGGGAA
ASHG19A3H0000604	2.31382	1.21028	2.31382	up	19.505	11.626	4.53411	3.32383	coding	NM_021192_Exon2-	NM_021192	HOX cluster	680	chr2	-	176973634	176974314		ATGACAGACTAAAAGTACATTTCCCAAAGTTTAAATAACCTGCATTCACCGAAGAGGAAG
ASHG19A3A016630	3.2134	1.6841	3.2134	up	97.0686	35.7701	6.747	5.0629	coding	NM_002148	HOXD10	RefSeq_coding	1814	chr2	+	176981491	176984669		TGGATATTTTAGACTGAGTCAGACCTACGCCACCGGGAAAACCCAAGAGTACAATAATAG	3236	Hs.123070	GO:0003702|GO:0003682|GO:0043565|GO:0003700|GO:0008344|GO:0009952|GO:0030326|GO:0048704|GO:0035136|GO:0035137|GO:0007275|GO:0050905|GO:0048935|GO:0045944|GO:0009954|GO:0006355|GO:0007519|GO:0001501|GO:0021520|GO:0005634	NP_002139	Homeobox D10
CUST_85_PI426249100	5.87223	2.55391	5.87223	up	1699.49	267.261	10.6497	8.09578	coding	NM_152739_Exon2-	NM_152739	HOX cluster	1403	chr7	-	27202057	27203460	NM_152739,	CCTCAAGGCCTACTGACCAAATTGTTGTGTTGAGATGATATTTAACTTTTTGCCAAATAA
CUST_25_PI426247286	3.31955	1.73099	3.31955	up	45.0559	17.1987	5.68865	3.95767	coding	NM_032391_intron2-	NM_032391	HOX cluster	417	chr17	-	46799261	46799679		CTTAATGTTTGTCTCCAATGGGATGGAGTCCTGGCATAAGCAAAATTAATATTGATAACG
CUST_87_PI426249100	44.7227	5.48294	44.7227	up	18888.8	368.44	14.0448	8.56189	coding	NM_018951_Exon2-	NM_018951	HOX cluster	1582	chr7	-	27210210	27211792	NM_153715,NM_018951,	GCTGTGCGTGGAAAAAGACGATGTTTATGTTCTTATAGAATAAAAGCTGTGGAATGAAGC
CUST_10_PI426249100	20.2416	4.33925	20.2416	up	7243.39	318.029	12.6883	8.34907	coding	NM_022658_Exon2+	NM_022658	HOX cluster	1671	chr12	+	54404872	54406543	NM_022658,	CAGCCCTGTTCCTGGTCCAAGTACTTTGTATTGTATACGTGAGTCATAATAATAAAAAGA
CUST_15_PI426249100	-2.16308	-1.11308	2.16308	down	69.8163	169.866	6.28848	7.40156	coding	NM_018953_Exon1+	NM_018953	HOX cluster	529	chr12	+	54426831	54427360	uc.344+,NM_018953,	TATAAGCAGAGCCCCAATATCCCTGCCTATAACATGCAAACTTGTGGGAACTATGGATCG
CUST_50_PI426249100	-2.00791	-1.00569	2.00791	down	174.276	366.145	7.5454	8.55109	coding	NM_021192_Exon1+	NM_021192	HOX cluster	781	chr2	+	176972083	176972864	NM_021192,	GTCTGACTTCGCTAGCAAGCCTTCGTTCCTTTCCCAACCGTCGTCCTGCCAGATGACTTT
ASHG19A3H0000515	-4.5195	-2.17616	4.5195	down	5.40761	35.4291	2.874	5.05017	coding	NM_002146_intron3+	NM_002146	HOX cluster	2897	chr17	+	46629994	46632892		ACTGGGGCTCGAATCCATCTTAGGAACTGAAAAGGGAACTGACATCAATAGGGTTTTTTC
ASHG19A3A048656	-302.797	-8.24221	302.797	down	9.27559	3134.64	3.52018	11.7624	coding	NM_017410	HOXC13	RefSeq_coding	2435	chr12	+	54332575	54340327		AAGTGGAGTTTTTAAAAAGCTCCAGCAGATCATGTCATGACGACTTCGCTGCTCCTGCAT	3229	Hs.118608	GO:0003702|GO:0005515|GO:0043565|GO:0003700|GO:0009653|GO:0009952|GO:0001942|GO:0007275|GO:0006355|GO:0043587|GO:0006351|GO:0005634	NP_059106	Homeobox C13
CUST_28_PI426249100	-2.69424	-1.42988	2.69424	down	7.57193	27.6244	3.24728	4.67716	coding	NM_002146_Exon1-	NM_002146	HOX cluster	612	chr17	-	46651198	46651810	NM_002146,	TGAAAACTTTTTTCTCTCAGTTTGGAAGAAGCCCTTCGTCATGAATGGGATCTGCAGAGT
CUST_52_PI426247286	-2.01174	-1.00844	2.01174	down	156.739	330.456	7.39918	8.40762	coding	NM_005523_intron2-	NM_005523	HOX cluster	1406	chr7	-	27222647	27224054		CCTCCTTCTGCCCAACTGCATGTTATTCACAATTGTTATTCAATCTGTCAAAAGCGATTT
CUST_47_PI426247286	-2.13095	-1.0915	2.13095	down	591.16	1145.58	9.19087	10.2824	coding	NM_024014_intron2-	NM_024014	HOX cluster	1389	chr7	-	27185536	27186926		GAAAACATCTCGCTTGGTATGAAATAATCTCCCATTCAGTATGCTTTGGGCCCCAGACAT
CUST_68_PI426249100	-2.95366	-1.5625	2.95366	down	426.438	1173.47	8.7581	10.3206	coding	NM_006735_Exon2-	NM_006735	HOX cluster	1111	chr7	-	27139973	27141084	NM_006735,	CCTGAGAGCAGTATGAGGCCTGCAAGAAAGTGATCATATAATTGTATCTTCACTTTCTTT
ASHG19A3H0000614	-5.86743	-2.55273	5.86743	down	35.1922	235.242	5.34186	7.89459	coding	NM_006898_Exon3-	NM_006898	HOX cluster	1582	chr2	-	177036244	177037826		ATTTGTTCCAATAGTACCAGACAATTTGAAATCAATAAACTGTGGTGAGGACTGTGGTTT
CUST_17_PI426247286	-2.60184	-1.37953	2.60184	down	14.632	48.2499	4.13236	5.51189	coding	NM_024015_intron2-	NM_024015	HOX cluster	841	chr17	-	46654382	46655224		AACGCTGTGTTCCCTGGAAGAAAGGACTCTCTCTTTCGGGGGCAATAAAACTTTCTCTTT
ASHG19A3H0000510	-2.68073	-1.42263	2.68073	down	14.4273	48.992	4.11061	5.53324	coding	NM_014620_intron2-	NM_014620	HOX cluster	639	chr12	-	54447060	54447700	uc.345-,	CTGGAGTGGAAAATAATTTTTCTCGCTTTGTCGTTTTTCTGCTCCATAAAGCCCTCCTAC
ASHG19A3A048664	-2.36254	-1.24034	2.36254	down	103.08	262.561	6.82825	8.06859	coding	NM_018953	HOXC5	RefSeq_coding	1613	chr12	+	54426831	54429142	uc.344+,	TATAAGCAGAGCCCCAATATCCCTGCCTATAACATGCAAACTTGTGGGAACTATGGATCG	3221	Hs.549040	GO:0043565|GO:0003700|GO:0030528|GO:0009952|GO:0051216|GO:0048562|GO:0007275|GO:0006355|GO:0006351|GO:0005634	NP_705897	Homeobox C4
CUST_24_PI426249100	-16.619	-4.05476	16.619	down	279.188	4386.66	8.18253	12.2373	coding	NM_002145_Exon1-	NM_002145	HOX cluster	511	chr17	-	46621882	46622393	NM_002145,	GGAGACATTTCAAACTTCATCAATCAAGGAGTCGACATTAATTCCTCCTCCTCCTCCTTT
ASHG19A3A008519	-4.69197	-2.23019	4.69197	down	62.0716	320.33	6.12845	8.35864	coding	NM_032391	PRAC	RefSeq_coding	403	chr17	-	46799091	46799882		TTCTCAGATCAAGGACCGGCCCATCTTACTACCTCCAAGAGTGCTTTTCTCTCTAATAAG	84366	Hs.116467	GO:0005634	NP_115767	Prostate cancer susceptibility candidate
ASHG19A3H0000599	-2.05525	-1.03931	2.05525	down	76.949	176.712	6.42259	7.4619	coding	NM_000523_Exon1-	NM_000523	HOX cluster	868	chr2	-	176957531	176958399		CTGGAAAGGAAGATTTCCAAAAGTGGGACCCCTGTGGCTGGTCCTTGGTGCAGTACACCT
ASHG19A3H0000524	-3.39754	-1.76449	3.39754	down	123.508	440.327	7.07831	8.8428	coding	NM_024017_intron2+	NM_024017	HOX cluster	2616	chr17	+	46700497	46703114		AGGCTTCCTCAGCACTTCCAAAGCTCTGCCTACATCAAGTTCCCTCTCAATTTTTCTCTA
CUST_3_PI426247286	-4.61508	-2.20635	4.61508	down	5	26.3395	2.39437	4.60072	coding	NM_014212_intron1+	NM_014212	HOX cluster	1256	chr12	+	54367707	54368964		TTTTGAAAATGTTCAAACTATGTGTTCGCGGGTCCTCGAGCAGAAACCCAAGCAACTCTG
ASHG19A3H0000615	-2.56167	-1.35708	2.56167	down	19.5914	62.0773	4.54055	5.89763	coding	NM_024501_Exon1-	NM_024501	HOX cluster	879	chr2	-	177053306	177054185		TTACCTTTCTTAGAGGCATTCCTCTTCACTTTCATCCACTCGAACGTGCTGAAGGCGGCA
ASHG19A3H0000625	-5.265	-2.39643	5.265	down	20.2857	128.612	4.58747	6.9839	coding	NM_153632_Exon2+	NM_153632	HOX cluster	162	chr7	+	27149733	27149895		TGGAGCTGCTGGTTTTCTGCTTTGTGTTTTGTCGAGACTCTTTCATCCAGGGGAAGATTT
ASHG19A3A008503	-16.8351	-4.0734	16.8351	down	272.095	4326.32	8.14438	12.2178	coding	NM_002145	HOXB2	RefSeq_coding	1614	chr17	-	46620020	46622393		GGAGACATTTCAAACTTCATCAATCAAGGAGTCGACATTAATTCCTCCTCCTCCTCCTTT	3212	Hs.514289	GO:0043565|GO:0003700|GO:0030528|GO:0009952|GO:0008015|GO:0009953|GO:0048704|GO:0021612|GO:0002011|GO:0007275|GO:0048857|GO:0006355|GO:0021569|GO:0021570|GO:0005634	NP_002136	Homeobox B2
CUST_69_PI426249100	-2.86281	-1.51743	2.86281	down	11.2544	41.8064	3.78037	5.2978	coding	NM_006735_Exon1-	NM_006735	HOX cluster	666	chr7	-	27141728	27142394	uc.212-,NM_006735,	GATACATTTCAAAGTTCATCAATCAAGACCTCGACGCTTTCACACTCGACACTGATTCCT
ASHG19A3H0000602	-2.89699	-1.53456	2.89699	down	24.5011	85.9933	4.84139	6.37595	coding	NM_021193_Exon2-	NM_021193	HOX cluster	239	chr2	-	176965249	176965488		TGAGGTTCAGCCTATTGGACAATTCCTTGCGTTTCTGCCTGTTGATGAATTCGTTGACGA
CUST_22_PI426247286	-5.61229	-2.48859	5.61229	down	15.3076	106.159	4.20174	6.69032	coding	NM_004502_intron2-	NM_004502	HOX cluster	2422	chr17	-	46685457	46687880		GGGAAAATGGGCTTCTTTGCCCATCGCCCATTGACTTCAAATCACATACACGGTATAAGA
ASHG19A3H0000533	-2.67098	-1.41737	2.67098	down	165.493	453.752	7.47069	8.88806	coding	NM_014621_intron1-	NM_014621	HOX cluster	540	chr2	-	177016794	177017335		TCCTCAAACACACCCACATACCCCAGGCTTGCGGGATCCCCAAATGTGCTCCTTCTTCTG
ASHG19A3H0000202	11.9945	3.5843	11.9945	up	725.72	61.8413	9.47401	5.88971	noncoding	nc-HOXD9-16-	nc-HOXD9-16	HOX cluster	558	chr2	+	176984428	176984986		ATTAAGAAAACCCACAAGTTGGAGGGAGGGGGACTTAAAAAGCACATTACAATGTATCTT
ASHG19A3H0000205	2.18229	1.12584	2.18229	up	12791.9	4782.53	13.4944	12.3686	noncoding	nc-HOXC10-129-	nc-HOXC10-129	HOX cluster	260	chr12	+	54378513	54378773		CTCCACCCCTCTACCTCCCCTGCCGCCCGGGGGGCGCTTCCTTTGTTCGCGGGGAAGGGC
ASHG19A3H0000181	3.26452	1.70687	3.26452	up	27.1014	11.3051	4.98691	3.28004	noncoding	nc-HOXD3-39-	nc-HOXD3-39	HOX cluster	2228	chr2	+	177018599	177020827		TGGGGAAAGAAAACAAAACCTCTATGCACTGGGTCATTAGATAATGACTGAATTTTCTGT
CUST_187_PI426075208	4.85549	2.27962	4.85549	up	141.658	33.9837	7.26512	4.9855	noncoding	nc-HOXD4-22+	nc-HOXD4-22	HOX cluster	706	chr2	-	176996730	176997436		TACGCAAAGAAACCTTTTAGGAGTAAACAAAACGCACCCGAACTATTCATTATAAAGGAA
CUST_187_PI426075208	4.85549	2.27962	4.85549	up	141.658	33.9837	7.26512	4.9855	noncoding	nc-HOXD4-22+	nc-HOXD4-22	HOX cluster	706	chr2	-	176996730	176997436		TACGCAAAGAAACCTTTTAGGAGTAAACAAAACGCACCCGAACTATTCATTATAAAGGAA
CUST_187_PI426075208	4.85549	2.27962	4.85549	up	141.658	33.9837	7.26512	4.9855	noncoding	nc-HOXD4-22+	nc-HOXD4-22	HOX cluster	706	chr2	-	176996730	176997436		TACGCAAAGAAACCTTTTAGGAGTAAACAAAACGCACCCGAACTATTCATTATAAAGGAA
ASHG19A3H0000090	3.41257	1.77086	3.41257	up	47.8573	17.6487	5.77091	4.00005	noncoding	nc-HOXB4-168-	nc-HOXB4-168	HOX cluster	1808	chr17	-	46657690	46659498		GTCTGAGATTACCTATTGGACCCTCTCTTGGCAAAGACAACCATAGTGTGATAGTTTGCT
ASHG19A3A014670	2.07758	1.05491	2.07758	up	165.902	88.6509	7.47489	6.41998	noncoding	ENST00000417086	AC009336.23	Ensembl	984	chr2	-	177040721	177053268		CGACCGGGGGCTGCCTGGGCAAGGGCGGGGCGAGAGGGCAGAACGCCTGCTCTCGGACAG
CUST_3_PI426075208	2.61769	1.38829	2.61769	up	279.214	113.65	8.18272	6.79443	noncoding	nc-HOXA11-83+	nc-HOXA11-83	HOX cluster	223	chr7	+	27224832	27225055		TGAAGTAGAAATTTGGAGACGTAAGCTGACGTGGAAATCTATCCCCATCCTTAGCAGGGA
ASHG19A3H0000169	16.8876	4.07789	16.8876	up	245.181	16.8111	7.9986	3.92071	noncoding	nc-HOXD10-7-	nc-HOXD10-7	HOX cluster	388	chr2	+	176974318	176974706		GGTTTCTAGTAAAATGGAGGTTACAGCTTCAATACACTGTATGAATTCTCCTCTTTGAGG
ASHG19A3H0000080	4.62194	2.2085	4.62194	up	1126.94	231.23	10.0767	7.86821	noncoding	nc-HOXA13-96-	nc-HOXA13-96	HOX cluster	318	chr7	-	27240358	27240676		TCAGTGTACACTGTGTGTGTGTGTGATGAGTCGTTCTGAGTCTATGGGTCTAAATGCAAA
CUST_209_PI426075208	2.37813	1.24983	2.37813	up	3823.46	1369.1	11.8015	10.5517	noncoding	nc-HOXC9-139+	nc-HOXC9-139	HOX cluster	148	chr12	-	54391685	54391833		TGTCAATCAAAAAATCTCCCTCACTAGTTCAAGGAAAAGACAGGAGGTTCCAGTCCCCCT
CUST_139_PI426075208	2.80412	1.48755	2.80412	up	20.3578	9.97092	4.59339	3.10584	noncoding	nc-HOXC6-245+	nc-HOXC6-245	HOX cluster	218	chr12	-	54416621	54416839		TATCCAGAATATTTTCAGCCCCCAGAATAGGGCCTCAAGAGGATGTCACATGAGGAAGAA
CUST_139_PI426075208	2.80412	1.48755	2.80412	up	20.3578	9.97092	4.59339	3.10584	noncoding	nc-HOXC6-245+	nc-HOXC6-245	HOX cluster	218	chr12	-	54416621	54416839		TATCCAGAATATTTTCAGCCCCCAGAATAGGGCCTCAAGAGGATGTCACATGAGGAAGAA
ASHG19A3A014668	11.7156	3.55036	11.7156	up	1940.48	157.307	10.837	7.2866	noncoding	uc002ukq.2	BC034000	UCSC_knowngene	690	chr2	-	176999570	177001826		GACACAAGAAGCTTGGATGTGAAATAGCACTTCCTTCTGTGTTACAGAATAAAACAATAT
CUST_4_PI426075208	64.5143	6.01155	64.5143	up	878.646	14.8879	9.74016	3.72861	noncoding	nc-HOXA11-86+	nc-HOXA11-86	HOX cluster	128	chr7	+	27228787	27228915		CGCTTCTTTCCACAGCCTTTGCAGGCGGAATATCGGAATAAAGTGGGTCCAGGCGCCTCT
ASHG19A3H0000076	43.0534	5.42806	43.0534	up	1363.21	32.3391	10.3402	4.91219	noncoding	nc-HOXB9-205-	nc-HOXB9-205	HOX cluster	838	chr17	-	46802225	46803063		AGGAAGATGAGGTCGATTTCCTGATTTAAAAAATCGTCCAAGCCCCGTGGTCCAGCTTAA
ASHG19A3A047647	55.5515	5.79575	55.5515	up	344.166	7.05075	8.47277	2.67701	noncoding	ENST00000505700	AC012531.17	Ensembl	548	chr12	-	54392805	54393794		CCTCGGTCGTGGGCAAGTAGCTTGTTTTTACGTCCCTCAATAAAATTTTTATGAGGATCA
CUST_210_PI426075208	2.05242	1.03732	2.05242	up	73.6239	42.7257	6.36463	5.3273	noncoding	nc-HOXD10-15+	nc-HOXD10-15	HOX cluster	130	chr2	-	176981368	176981498		TGTAATTGTGGATGCCTCTGCCGACCACATGACAACCAAGCCAATGAGATTTGAAAATGG
ASHG19A3H0000100	2.80719	1.48913	2.80719	up	1839.64	584.914	10.7648	9.27567	noncoding	nc-HOXC10-121-	nc-HOXC10-121	HOX cluster	248	chr12	+	54373384	54373632		CGCACCCCTCCAACCCACTGCACAAAGCAAAGACCCATAACCTTGACTCAGACTGCTGAT
CUST_50_PI426075208	2.4121	1.27029	2.4121	up	93.9359	45.5691	6.69928	5.42899	noncoding	nc-HOXB4-172+	nc-HOXB4-172	HOX cluster	148	chr17	+	46663130	46663278		AATAGGGTATCCTCTATCATGCCTCCAAATCCCTCAAGAGGCGACGCCCCACACAGGCTG
CUST_33_PI426075208	2.61931	1.38919	2.61931	up	22481.3	6807.95	14.2884	12.8992	noncoding	nc-HOXA7-73+	nc-HOXA7-73	HOX cluster	148	chr7	+	27196467	27196615		GCCCCCCCGCCGACTCCTGCTAGTGAGCCCTGGACCAAGCTTGGGATCCTCCCCATCCCT
ASHG19A3H0000017	2.04788	1.03413	2.04788	up	51.9295	30.8987	5.88117	4.84703	noncoding	nc-HOXA13-99-	nc-HOXA13-99	HOX cluster	148	chr7	-	27242338	27242486		AAAAAGTCCAGATAAATTTGATCAATAAGGTGCACCATAAATCTCAAGAATTCAGTCCCC
ASHG19A3A008515	2.11264	1.07905	2.11264	up	34.4049	20.467	5.31014	4.23109	noncoding	ENST00000438772	AC036222.1	Ensembl	595	chr17	-	46710868	46724152		TTCATCAACACGGTGAAGTTTTATTGTATTTCCGGTCCCCAAGATTTATACCCGGGAGGG
CUST_2_PI426075208	3.41439	1.77163	3.41439	up	250.836	79.2974	8.02817	6.25654	noncoding	nc-HOXA10-82+	nc-HOXA10-82	HOX cluster	370	chr7	+	27220757	27221127		TTTCCAAATGTTGCAAGAGATTAAAAAGACCATTCTCAATACCTTTTCCACCCCCTCCAA
ASHG19A3A047650	2.79687	1.48382	2.79687	up	4557.42	1384.8	12.0535	10.5697	noncoding	ENST00000513381	RP11-834C11.5	Ensembl	499	chr12	-	54478915	54519614		AGCAATTTTCTCCCTCTCCAGGCCTCTTACAGATGTGAAACAACTGGCAGATCTGACTTT
ASHG19A3H0000170	17.5889	4.13659	17.5889	up	79.1973	5	6.46787	2.33128	noncoding	nc-HOXD10-8-	nc-HOXD10-8	HOX cluster	1788	chr2	+	176974818	176976606		CCTCTCACGGCATTTATCGCTTCAAGTTAAAGAATGTGGTGAGGGCTCTACTGCACTTTA
CUST_71_PI426075208	7.83891	2.97065	7.83891	up	82.3058	13.4125	6.52227	3.55162	noncoding	nc-HOXB9-200+	nc-HOXB9-200	HOX cluster	198	chr17	+	46795419	46795617		TAAAAGTAGCTCTGTGTTTTAAGACCCGTGTTCTACTTGCTGCGATCGGGATAGTTTTTT
ASHG19A3H0000102	2.70218	1.43412	2.70218	up	154.669	64.3685	7.38321	5.94909	noncoding	nc-HOXC10-123-	nc-HOXC10-123	HOX cluster	148	chr12	+	54374923	54375071		GTAGCATCTGTGTGCAAGTGTGTGCAATGTCAAGACGTGAGAGATTCTGCTGGCCGAGCT
ASHG19A3H0000097	2.11417	1.08009	2.11417	up	453.293	215.204	8.83836	7.75827	noncoding	nc-HOXC10-118-	nc-HOXC10-118	HOX cluster	118	chr12	+	54371444	54371562		AGGAATGCAACTGAGGGGCCTCTGTACATTTTTGTGTGTGTATGTGTGTGTGACACTTCT
ASHG19A3H0000093	2.03679	1.02629	2.03679	up	2674.5	1134.79	11.2944	10.2681	noncoding	nc-HOXB9-192-	nc-HOXB9-192	HOX cluster	318	chr17	-	46767765	46768083		CCACGTCTACTGCGAGAATGAAGACCATTCTCAGCAATCAGACTGTTGACATTCCAGAAA
ASHG19A3A016637	2.55886	1.3555	2.55886	up	724.428	270.66	9.47121	8.11571	noncoding	ENST00000426615	AC009336.24	Ensembl	658	chr2	+	177042908	177043737		GAAGTAGGCTAAGACTGCTGTTGAACTTGAAGCTAAACTTGAATGCCATTTAAAATAACA
ASHG19A3A034091	3.64546	1.8661	3.64546	up	77.6989	25.8451	6.43819	4.57209	noncoding	NR_002795	HOXA11AS	RefSeq_NR	1628	chr7	+	27225026	27228912		ATTTGCACGGTGACTTGATTACACTCTCTCATTCATGGTCACTTCCGAAGCGCTTTAGTG
CUST_95_PI426075208	3.48285	1.80027	3.48285	up	6750.45	1618.77	12.59	10.7897	noncoding	nc-HOXB9-199+	nc-HOXB9-199	HOX cluster	188	chr17	+	46791012	46791200		GGAACTGCTTGCAGGACTACCTGGACTTCCACCTCTGTGAGAAGGCAGTGATTGCTAAAG
CUST_78_PI426075208	4.45183	2.1544	4.45183	up	113.119	30.0134	6.95482	4.80042	noncoding	nc-HOXA11-84+	nc-HOXA11-84	HOX cluster	708	chr7	+	27225087	27225795		ATTTGCACGGTGACTTGATTACACTCTCTCATTCATGGTCACTTCCGAAGCGCTTTAGTG
CUST_109_PI426075208	4.89209	2.29045	4.89209	up	68.6027	17.3546	6.26408	3.97363	noncoding	nc-HOXC11-107+	nc-HOXC11-107	HOX cluster	148	chr12	-	54352146	54352294		GTCAGGTGTCAGATACCCAGCGGGGGATGGAGGCATGTGATTTTATCTCCATTCTGCTGG
ASHG19A3H0000085	3.76058	1.91096	3.76058	up	86.4995	27.728	6.59226	4.6813	noncoding	nc-HOXA5-68-	nc-HOXA5-68	HOX cluster	648	chr7	-	27183537	27184185		CCGGACCCTGTGATGAAGATTTTCCAGGCTGGATACGTAAGCAAATCAAATCGCAAACTA
ASHG19A3H0000023	4.6841	2.22777	4.6841	up	156.644	38.3782	7.3975	5.16973	noncoding	nc-HOXA4-61-	nc-HOXA4-61	HOX cluster	158	chr7	-	27170427	27170585		GGGGCGCTGCACGTGGGGCACGGGGCGGGGCGCGCGCTGGGCTGGGGAGGAGCGGCTCGA
CUST_63_PI426075208	2.14938	1.10392	2.14938	up	995.531	431.68	9.90922	8.80529	noncoding	nc-HOXB9-186+	nc-HOXB9-186	HOX cluster	168	chr17	+	46715352	46715520		TAAAGTCGGGTCTGTATGTGTCAGCATTCCTGTGTGTGAGTGTGTGTGTGAATATGTGCA
ASHG19A3H0000077	68.5727	6.09956	68.5727	up	1187.59	18.2264	10.1489	4.04938	noncoding	nc-HOXB9-206-	nc-HOXB9-206	HOX cluster	691	chr17	-	46803175	46803866		GCTGCCATGATCGTTAGCCTCATATTTTCTATCTAGAGCTCTGTAGAGCACTTTAGAAAC
ASHG19A3A008508	27.5153	4.78216	27.5153	up	326.304	13.9077	8.39892	3.61676	noncoding	AK000839		misc_RNA	1951	chr17	-	46657698	46659621		ATATCTAGATATTCGTTTGATCACAAACTAAAGGCTTGGAGGGGCACGGAGGAGCCGATT
ASHG19A3H0000187	2.04964	1.03537	2.04964	up	1212.11	530.269	10.1716	9.13624	noncoding	nc-HOXD4-22-	nc-HOXD4-22	HOX cluster	706	chr2	+	176996730	176997436		TTCCTTTATAATGAATAGTTCGGGTGCGTTTTGTTTACTCCTAAAAGGTTTCTTTGCGTA
ASHG19A3H0000187	2.04964	1.03537	2.04964	up	1212.11	530.269	10.1716	9.13624	noncoding	nc-HOXD4-22-	nc-HOXD4-22	HOX cluster	706	chr2	+	176996730	176997436		TTCCTTTATAATGAATAGTTCGGGTGCGTTTTGTTTACTCCTAAAAGGTTTCTTTGCGTA
ASHG19A3H0000187	2.04964	1.03537	2.04964	up	1212.11	530.269	10.1716	9.13624	noncoding	nc-HOXD4-22-	nc-HOXD4-22	HOX cluster	706	chr2	+	176996730	176997436		TTCCTTTATAATGAATAGTTCGGGTGCGTTTTGTTTACTCCTAAAAGGTTTCTTTGCGTA
ASHG19A3A047643	4.84766	2.27729	4.84766	up	3980.25	713.952	11.8561	9.57881	noncoding	NR_003716	HOTAIR	RefSeq_NR	2337	chr12	-	54356097	54362515		CCTTGTGTAGGTTGTGTGTGTGTGGTGGTTTTATGCATAAATAAAGTTTTACATGTGGTG
ASHG19A3A009656	2.38657	1.25494	2.38657	up	1290.25	488.48	10.26	9.00504	noncoding	ENST00000489624	COX6B1P2	Ensembl	216	chr17	+	46791091	46791307		TTTGTATGTGAATGGTACCAGCCTGTGTACAAGTCCCTCATTCCCATATCCTGGATCTCA
CUST_177_PI426075208	3.66327	1.87313	3.66327	up	6090.6	1390.91	12.4531	10.58	noncoding	nc-HOXD1-48+	nc-HOXD1-48	HOX cluster	138	chr2	-	177046473	177046611		AGAGACACTTTTTACTAGCATAATTTATATATATGTGTGTGTGTGTGTGTACTCCACAGG
ASHG19A3H0000088	-2.02549	-1.01827	2.02549	down	98.1358	218.091	6.76013	7.7784	noncoding	nc-HOXB2-162-	nc-HOXB2-162	HOX cluster	178	chr17	-	46623286	46623464		CCCACCACACTCATGCACACACATAACGCTGATCTGAACTTTGAGAGTGCTCTAAGTTAA
ASHG19A3H0000141	-2.16908	-1.11708	2.16908	down	62.9861	155.18	6.14803	7.26512	noncoding	nc-HOXC6-247-	nc-HOXC6-247	HOX cluster	138	chr12	+	54417941	54418079		CAGTGGCACAAAAGGGGCCAGCGGGGCAACCGTTCTTCTCTTGCTCAGAAAAGTGAGACT
ASHG19A3H0000141	-2.16908	-1.11708	2.16908	down	62.9861	155.18	6.14803	7.26512	noncoding	nc-HOXC6-247-	nc-HOXC6-247	HOX cluster	138	chr12	+	54417941	54418079		CAGTGGCACAAAAGGGGCCAGCGGGGCAACCGTTCTTCTCTTGCTCAGAAAAGTGAGACT
ASHG19A3H0000191	-3.00999	-1.58976	3.00999	down	112.839	363.604	6.95236	8.54213	noncoding	nc-HOXD4-28-	nc-HOXD4-28	HOX cluster	248	chr2	+	177005928	177006176		CAGCGACACCTTACTTAAATAATGCTCTGACCCAATCCCACTGATCCTCCGTTATCTCTT
CUST_88_PI426075208	-6.38567	-2.67484	6.38567	down	674.703	3841.33	9.37936	12.0542	noncoding	nc-HOXB2-162+	nc-HOXB2-162	HOX cluster	178	chr17	+	46623286	46623464		TTAACTTAGAGCACTCTCAAAGTTCAGATCAGCGTTATGTGTGTGCATGAGTGTGGTGGG
CUST_170_PI426075208	-3.03968	-1.60392	3.03968	down	180.818	557.666	7.59744	9.20136	noncoding	nc-HOXD10-8+	nc-HOXD10-8	HOX cluster	1788	chr2	-	176974818	176976606		TAAAGTGCAGTAGAGCCCTCACCACATTCTTTAACTTGAAGCGATAAATGCCGTGAGAGG
ASHG19A3H0000177	-2.46085	-1.29916	2.46085	down	68.7366	189.784	6.2678	7.56695	noncoding	nc-HOXD1-48-	nc-HOXD1-48	HOX cluster	138	chr2	+	177046473	177046611		CCTGTGGAGTACACACACACACACACATATATATAAATTATGCTAGTAAAAAGTGTCTCT
CUST_44_PI426075208	-2.34332	-1.22856	2.34332	down	139.876	346.686	7.24729	8.47585	noncoding	nc-HOXB2-164+	nc-HOXB2-164	HOX cluster	1039	chr17	+	46626206	46627245		TGGGAAAGTTGGAAGGGAACGTGTTTTGTGCCTTTTGGGTTTGAAATGTGTTTTCTTATT
CUST_15_PI426075208	-4.53699	-2.18173	4.53699	down	287.31	1247.21	8.22367	10.4054	noncoding	nc-HOXA13-97+	nc-HOXA13-97	HOX cluster	348	chr7	+	27241198	27241546		TTTAGCAGTTCTGGGTAAATATTGATTTGCCCCCAGTTTACCTTCTCCCTGACTGGCCAT
CUST_16_PI426075208	-3.14125	-1.65134	3.14125	down	84.337	289.026	6.55816	8.20949	noncoding	nc-HOXA13-98+	nc-HOXA13-98	HOX cluster	208	chr7	+	27241728	27241936		TTTTTAAAATTCTCGCCTCTGACTCTGTTCGGCTGCCCAGAATTTTTTGGTGCCTTCGTG
ASHG19A3H0000213	-2.15241	-1.10595	2.15241	down	44.8504	113.191	5.68291	6.78886	noncoding	nc-HOXD8-21-	nc-HOXD8-21	HOX cluster	348	chr2	+	176993168	176993516		CGAGCAGGAGAGGGGAAAACACACACACACAACAGAGAACCATTGCATTTATTGGACATT
ASHG19A3H0000107	-11.7732	-3.55744	11.7732	down	1370.18	13360.1	10.3471	13.9045	noncoding	nc-HOXC10-128-	nc-HOXC10-128	HOX cluster	158	chr12	+	54378343	54378501		CCACAAACCTCACCCCACTCCCATCCCCAAGGTAAGAAGTGGGAGTCGGGTCCGGGGATA
CUST_183_PI426075208	-4.11861	-2.04216	4.11861	down	160.175	661.695	7.42618	9.46834	noncoding	nc-HOXD3-42+	nc-HOXD3-42	HOX cluster	178	chr2	-	177026009	177026187		TTTTCAGCCCATTCTCCTAAGTGCACATTTAGCCCCCAAATATTTCCTCCAGCACTCAAT
CUST_140_PI426075208	-2.49071	-1.31656	2.49071	down	81.7873	225.619	6.51248	7.82904	noncoding	nc-HOXC6-246+	nc-HOXC6-246	HOX cluster	968	chr12	-	54416901	54417869		TCTCTGACTTAAGGTTAAAACGTAAAATAGGTCCCAAACATCTCTACCCCATCACGCTCA
CUST_140_PI426075208	-2.49071	-1.31656	2.49071	down	81.7873	225.619	6.51248	7.82904	noncoding	nc-HOXC6-246+	nc-HOXC6-246	HOX cluster	968	chr12	-	54416901	54417869		TCTCTGACTTAAGGTTAAAACGTAAAATAGGTCCCAAACATCTCTACCCCATCACGCTCA
CUST_87_PI426075208	-5.52367	-2.46563	5.52367	down	188.436	1023.57	7.65226	10.1179	noncoding	nc-HOXB2-161+	nc-HOXB2-161	HOX cluster	418	chr17	+	46622846	46623264		ACAACAGTTAAATCTTGGGAAATGGACAGGAACTCCCAGGCAGACACATAGGAGTGAGAT
ASHG19A3H0000142	-2.25278	-1.1717	2.25278	down	8.32148	25.2963	3.36855	4.54025	noncoding	nc-HOXC6-248-	nc-HOXC6-248	HOX cluster	948	chr12	+	54418111	54419059		GAGGAGACAGGGAGAACACAACTAAGGAGGACCTCTGGAAAATATTGTCCCCAAATAAAA
ASHG19A3H0000142	-2.25278	-1.1717	2.25278	down	8.32148	25.2963	3.36855	4.54025	noncoding	nc-HOXC6-248-	nc-HOXC6-248	HOX cluster	948	chr12	+	54418111	54419059		GAGGAGACAGGGAGAACACAACTAAGGAGGACCTCTGGAAAATATTGTCCCCAAATAAAA
ASHG19A3H0000035	-2.83761	-1.50468	2.83761	down	115.377	349.584	6.98149	8.48617	noncoding	nc-HOXA7-75-	nc-HOXA7-75	HOX cluster	108	chr7	-	27200477	27200585		TGGGAAACAAGGAATCGGCGGGGGCTTGCCCGACCCTCACCGCTCGCGCCTCCCTGACCC
CUST_137_PI426075208	-2.21613	-1.14804	2.21613	down	396.328	839.06	8.6671	9.81514	noncoding	nc-HOXC6-243+	nc-HOXC6-243	HOX cluster	958	chr12	-	54414121	54415079		ATATAATAAATATATAACACTCCCAAGCCTGGTTTCAGAACACAGCCAACCCAACAAGGT
CUST_137_PI426075208	-2.21613	-1.14804	2.21613	down	396.328	839.06	8.6671	9.81514	noncoding	nc-HOXC6-243+	nc-HOXC6-243	HOX cluster	958	chr12	-	54414121	54415079		ATATAATAAATATATAACACTCCCAAGCCTGGTTTCAGAACACAGCCAACCCAACAAGGT
CUST_182_PI426075208	-2.26252	-1.17793	2.26252	down	2102.19	4012.74	10.947	12.1249	noncoding	nc-HOXD3-41+	nc-HOXD3-41	HOX cluster	128	chr2	-	177025459	177025587		GAGCGGCAGCCACCCGCGCCCCCACCCACTCCTGGGTTTCTGCCCAGCCCTCCCAGGCCC
ASHG19A3H0000008	-2.51661	-1.33148	2.51661	down	267.359	654.151	8.1183	9.44978	noncoding	nc-HOXA11-90-	nc-HOXA11-90	HOX cluster	168	chr7	-	27231227	27231395		CTTTGGTGAGACCCTTGATGCTCTTCTCCTGCCTAAAATCCACACAGATGTGAGGCGCAC
ASHG19A3H0000031	-2.6342	-1.39736	2.6342	down	191.094	507.305	7.67088	9.06824	noncoding	nc-HOXA6-71-	nc-HOXA6-71	HOX cluster	218	chr7	-	27192547	27192765		GCATGCGCCCTGAACCCAGCCCCAGGCTAGGAAATGGGATTTAAGGTCCCCACCCCGCCT
CUST_69_PI426075208	-2.27673	-1.18696	2.27673	down	283.549	630.768	8.20488	9.39185	noncoding	nc-HOXB9-196+	nc-HOXB9-196	HOX cluster	208	chr17	+	46782504	46782712		AGAGACAGAAATCAAATCTAGGGTGTTCATCTAGAGTCTCCTGCTCCTCCATTCCTGCTT
ASHG19A3H0000197	-3.25666	-1.70339	3.25666	down	8.28931	35.8626	3.36349	5.06689	noncoding	nc-HOXD4-34-	nc-HOXD4-34	HOX cluster	158	chr2	+	177012419	177012577		GTACTGATCGCGGGGAAGTGGTGGGCTAAGGGGCCAAGCCAGCGGAGTGGGCGGATAGAA
ASHG19A3A048667	-2.3437	-1.22879	2.3437	down	30.0606	84.9875	5.13005	6.35883	noncoding	NR_026655	FLJ12825	RefSeq_NR	3942	chr12	+	54452037	54516018		AAGTAAAAAGAAGACGGGTGAAATGTCGACACCAATCTTCCAGGGTTCCTTCTCTCCAAG
CUST_204_PI426075208	-2.78418	-1.47725	2.78418	down	21.7391	74.0806	4.67823	6.15548	noncoding	nc-HOXD9-18+	nc-HOXD9-18	HOX cluster	178	chr2	-	176986908	176987086		CCACACACACGCTTGCTCACAGCTTGTCGTGTTGTTTAAAACAGGTGGAAGACCTCTGTA
ASHG19A3A032595	-2.9495	-1.56047	2.9495	down	46.6157	158.026	5.73373	7.2942	noncoding	HIT000098379		H-invDB	227	chr7	-	27235768	27235994		ACCTCCTTGACTTTAGAGATTCAGTACTCAATTATTTGGCTCCAGCTGGAGCAAATTTGA
ASHG19A3H0000032	-2.8409	-1.50635	2.8409	down	330.11	896.547	8.41504	9.92139	noncoding	nc-HOXA6-72-	nc-HOXA6-72	HOX cluster	1151	chr7	-	27193137	27194288		AGACCCGCAAGAAAGTGAATCTCACTACTACCTACTCCCCTAAAACTACCTATTTTGTGC
ASHG19A3H0000157	-59.0643	-5.88421	59.0643	down	686.723	35489.6	9.40077	15.285	noncoding	nc-HOXC9-131-	nc-HOXC9-131	HOX cluster	198	chr12	+	54384395	54384593		ACTGCTGCTGGGGGTCACCCCAAGAGCCCCCCACCCATCCAAGGAAAGGAATAAACTTAA
ASHG19A3H0000122	-2.66613	-1.41475	2.66613	down	23595.5	49076.6	14.3469	15.7616	noncoding	nc-HOXC13-102-	nc-HOXC13-102	HOX cluster	108	chr12	+	54332232	54332340		CCCTACACCCCTTTGCGTCGGCCAAATTCAGCCTCCCCCCCCTCCCTCTCCCTCCCTGGG
CUST_124_PI426075208	-4.37822	-2.13034	4.37822	down	23.3073	122.169	4.77229	6.90263	noncoding	nc-HOXC4-153+	nc-HOXC4-153	HOX cluster	519	chr12	-	54408220	54408739		TAGCAATCATAATTCCACGTTTAAAAACGAAACGGGACCTCAGCCATCCCTCGGAGTATG
ASHG19A3H0000064	-2.13589	-1.09484	2.13589	down	5085.11	8786.71	12.1957	13.2905	noncoding	nc-HOXB9-187-	nc-HOXB9-187	HOX cluster	168	chr17	-	46715907	46716075		TGGCTCTCTGTGAACAAAGCAGGTTTCCTCCTTGCCACTCACCCCCACCCCCCATACCAC
CUST_35_PI426075208	-2.5057	-1.32522	2.5057	down	48.8606	141.306	5.79961	7.12482	noncoding	nc-HOXA7-75+	nc-HOXA7-75	HOX cluster	108	chr7	+	27200477	27200585		GGGTCAGGGAGGCGCGAGCGGTGAGGGTCGGGCAAGCCCCCGCCGATTCCTTGTTTCCCA
ASHG19A3H0000083	-3.11779	-1.64052	3.11779	down	12.2334	48.7519	3.88655	5.52708	noncoding	nc-HOXA1-55-	nc-HOXA1-55	HOX cluster	328	chr7	-	27136777	27137105		AACCTAATAGTAAACAACAATTTAACGACCTCAGCAGCCTCAGGGAAGTAGGGTGATGAG
CUST_26_PI426075208	-2.46538	-1.30181	2.46538	down	25.2935	75.6824	4.88724	6.18904	noncoding	nc-HOXA4-64+	nc-HOXA4-64	HOX cluster	138	chr7	+	27178897	27179035		CCTTGGTCCTCAGGGTCCAGTGGGCGCTAGCAGCCCAGGATCCACCTTGCAACCCGGGGG
ASHG19A3H0000054	-2.01919	-1.01378	2.01919	down	84.5197	190.886	6.56144	7.57522	noncoding	nc-HOXB4-176-	nc-HOXB4-176	HOX cluster	158	chr17	-	46667810	46667968		CAAGTCTGGACACTTACCCGGTCAATCCCTTCCAGCTTGGCCCAACTTCTTACTGGACTT
CUST_113_PI426075208	-2.05781	-1.04111	2.05781	down	442.644	856.282	8.80794	9.84905	noncoding	nc-HOXC11-111+	nc-HOXC11-111	HOX cluster	698	chr12	-	54360504	54361202		TTATTTTCCTCTCCTTCTTTCTCTCTGTTCATCCCCAGTGCTACCCTGGAGGAAAAGGAT
ASHG19A3H0000063	-2.11781	-1.08257	2.11781	down	104.703	240.675	6.84909	7.93166	noncoding	nc-HOXB9-186-	nc-HOXB9-186	HOX cluster	168	chr17	-	46715352	46715520		TGCACATATTCACACACACACTCACACACAGGAATGCTGACACATACAGACCCGACTTTA
CUST_157_PI426075208	-2.82288	-1.49717	2.82288	down	9.97775	36.9905	3.61571	5.11287	noncoding	nc-HOXC9-131+	nc-HOXC9-131	HOX cluster	198	chr12	-	54384395	54384593		TTAAGTTTATTCCTTTCCTTGGATGGGTGGGGGGCTCTTGGGGTGACCCCCAGCAGCAGT
ASHG19A3H0000106	-2.74187	-1.45516	2.74187	down	46.7033	147.668	5.73571	7.19087	noncoding	nc-HOXC10-127-	nc-HOXC10-127	HOX cluster	248	chr12	+	54377713	54377961		ACGGTTCCCCTTATTTCTTCCTTTTATTTAAAAACAACCACAAAAATAGACTGGTCTGTC
ASHG19A3A014666	-2.45316	-1.29464	2.45316	down	16.0907	50.0039	4.27154	5.56618	noncoding	ENST00000440016	AC009336.21	Ensembl	582	chr2	-	176987087	177001741		TCGCTGACTCTCCAGCTTCCGAGCCGCGGGCGGCGAGTCCAGGGCACACGGAGCGGCCGC
ASHG19A3A014666	-2.45316	-1.29464	2.45316	down	16.0907	50.0039	4.27154	5.56618	noncoding	ENST00000440016	AC009336.21	Ensembl	582	chr2	-	176987087	177001741		TCGCTGACTCTCCAGCTTCCGAGCCGCGGGCGGCGAGTCCAGGGCACACGGAGCGGCCGC
ASHG19A3A014666	-2.45316	-1.29464	2.45316	down	16.0907	50.0039	4.27154	5.56618	noncoding	ENST00000440016	AC009336.21	Ensembl	582	chr2	-	176987087	177001741		TCGCTGACTCTCCAGCTTCCGAGCCGCGGGCGGCGAGTCCAGGGCACACGGAGCGGCCGC
ASHG19A3A014666	-2.45316	-1.29464	2.45316	down	16.0907	50.0039	4.27154	5.56618	noncoding	ENST00000440016	AC009336.21	Ensembl	582	chr2	-	176987087	177001741		TCGCTGACTCTCCAGCTTCCGAGCCGCGGGCGGCGAGTCCAGGGCACACGGAGCGGCCGC
