# Supplementary material for: Long Noncoding RNA Expression Signatures of Metastatic Nasopharyngeal Carcinoma and Their Prognostic Value
Source: Biomed Res Int. 2015 Sep 13;2015:618924. doi: 10.1155/2015/618924 (PMC4584063; doi:10.1155/2015/618924)
Supplement: Supplementary file 1 — Table S01. The clinical information corresponding to the seven NPC patient samples used for microarray analysis. Table S02. Four different lncRNA members (LOC84740, ENST00000498296, AL359062, and ENST00000438550) were selected to verify their expression levels via QPCR. This table supply the primer sequences used for Real-time PCR of the four lncRNAs. Table S03. lncRNA Expression Profiling Data. A total of 33,045 lncRNA probes were used in our lncRNA microarray. Up to 30,610 lncRNAs were detected in all seven samples. Table S04. Differentially Expressed lncRNAs. A total of 8,088 lncRNAs were identified to be significantly differentially expressed(≥2-fold) between the metastatic and primary NPC tumors in the microarray. Among these, 3,778 lncRNAs were found to be consistently upregulated; 4,310 lncRNAs were downregulated. Table S05. HOX cluster profiling. In this study, we detected the transcripts in HOX loci, 477 transcribed regions were found. Among them, 257 were ncRNAs and 220 were HOX coding transcripts. Table S06. Differentially expressed IncRNAs at HOX locus. In the four randomly paired groups, the number of differentially expressed lncRNAs differed, but several lncRNAs displayed similar changes in expression. Compared with the NPC primary tumors, 70 lncRNAs were found to be differentially expressed in metastatic tissues; 51 coding transcripts were differentially expressed. Table S07. Rinn lincRNA expression profiles. A total of 4,199 Rinn lincRNAs were detected in this microarray analysis. Table S08. Differentially expressed Rinn lincRNAs. A total of 1,069 Rinn lincRNAs were found to be differentially expressed. Table S09. Enhancer lncRNAs profiles. A total of 1,598 enhancer lncRNAs were detected, of which 468 lncRNAs were differentially expressed. Table S10. Data for enhancer lncRNAs regulating a nearby coding gene. The differentially expressed enhancer lncRNAs and their nearby coding genes (distance < 300 kb) were presented. Table S11. Data for lincRNAs reg [file 618924.f1.zip › S07 Rinn lincRNA expression profiles.xls]

## Sheet: Rinn lincRNAs profiling
Rinn lincRNAs profiling (Entities where at least 4 out of 7 samples have flags in Present or Marginal). This table contains profiling data of all probes for lincRNAs based on John Rinn's papers (Guttman, M., et al. 2009, Khalil, A.M., et al. 2009). # Column A: ProbeName, it represents the probe name. # Column B ~ H: Raw Intensity of each sample. # Column I ~ O: Normalized Intensity of each sample…
	Raw Intensity							Normalized Intensity							Flags							Annotations
ProbeName	[M1](raw)	[M2](raw)	[M3](raw)	[T1](raw)	[T2](raw)	[T31](raw)	[T4](raw)	[M1](normalized)	[M2](normalized)	[M3](normalized)	[T1](normalized)	[T2](normalized)	[T3](normalized)	[T4](normalized)	[M2]	[M1]	[M3]	[T4]	[T2]	[T3]	[T1]	chrom	GeneSymbol	probeSeq	RNAlength	seqname	source	strand	txEnd	txStart	type	relationship	Associated_gene_acc	Associated_gene_name	Associated_protein_name	Associated_gene_strand	Associated_gene_start	Associated_gene_end
ASHG19A3L0000337	36.0878	39.0981	34.3496	43.4549	15.6239	38.641	19.7896	5.3287	5.48051	5.30856	5.28036	3.8082	5.15892	4.00899	P	M	P	P	M	M	M	chr11	lincRNA-ETS1-2	AGATATCTGGTTGAGACCAAGTAAGAGATAAACCTGTAGATTCCACTGTGCCACCACAGT	540	W19582	lincRNA	+	128053029	128050349	noncoding	intergenic
ASHG19A3A000094	1866.03	1851.89	1572.53	1144.57	787.253	818.447	803.369	10.7186	10.7173	10.5355	10.2467	9.72039	9.74735	9.64301	P	P	P	M	M	M	M	chr14	MEG3	TGACTTGAGTAAGAACACGAATTATGCATTACCACTCCCCTGCCCCAGGAGCCACTCCCA	1670	ENST00000412736	Ensembl	+	101327308	101292454	noncoding	intergenic
ASHG19A3L0000965	44.1485	37.4518	36.7487	49.7335	48.7308	32.8709	64.0959	5.60925	5.4231	5.40672	5.48781	5.52637	4.91314	5.80922	P	P	P	M	M	M	M	chr18	lincRNA-LIPG-1	AAAGAGAGAACAGAGTTTTATCAGGATCTCTGCTCTACCCACCAAGACTCAAAACCAGGC	485	BQ027881	lincRNA	-	47144197	47143727	noncoding	intergenic
ASHG19A3A025289	20.1203	17.2827	15.1494	43.7306	41.8148	45.951	54.327	4.49697	4.42613	4.18646	5.2918	5.29795	5.41909	5.55987	A	P	A	M	M	M	M	chr4	RP11-61G19.1	AGTTCAGCAGTCCAACAAGAATGGCTTCTCATGCCAGAGTAGACTCTTCTTGTATTTAGG	640	ENST00000505494	Ensembl	+	10699285	10686626	noncoding	bidirectional	NM_052964	CLNK	cytokine-dependent hematopoietic cell linker	-	10491837	10686386
ASHG19A3L0003097	14.8676	17.1103	18.8943	21.3044	17.4277	21.8576	20.4003	4.06782	4.41451	4.48804	4.19735	3.97975	4.29699	4.05554	A	A	P	M	M	M	M	chr5	lincRNA-RGNEF-4	CCAGAGCCTCATGAATTACCCATTGCATTCATGGAGAAAGCTGATTGCTTTCCCCTTTTT	27424	chr5:73882471-73909894-	lincRNA	-	73909894	73882471	noncoding	intergenic
ASHG19A3L0003581	303.52	356.94	354.162	195.465	475.772	462.567	545.262	8.25954	8.47512	8.51205	7.53997	8.96375	8.88481	9.05516	P	P	P	M	M	M	M	chr13	lincRNA-FOXO1-1	GTTCACAAGTCATAACATCAGAATCCAACTCAGACCTCCTCATTCCATGCTTTCTAATTT	5201	chr13:40809650-40814850+	lincRNA	+	40814850	40809650	noncoding	intergenic
ASHG19A3A044660	76.4557	92.2147	71.1165	122.344	118.566	163.423	149.955	6.38924	6.64318	6.31287	6.8344	6.85785	7.31171	7.09033	P	P	P	M	M	M	M	chr10	CR592586	TGTGGCCCAATTCCAGTTCTCCAGGGTGCTCATCACTCTGTGGCAGTTTGTCTTCTGGTT	870	uc001lkl.2	UCSC_knowngene	+	131919004	131910185	noncoding	intergenic
ASHG19A3L0003241	494.664	495.923	297.416	340.789	303.833	365.16	300.473	8.91131	8.91415	8.27081	8.39213	8.28017	8.51804	8.14781	P	P	P	P	M	M	M	chr22	lincRNA-TBC1D22A	TTACCTTCCCCGCCAATGTAGACCGGAGACCAGCCACTCTCCAGAGAAACCACAAATGAA	830	BI763082	lincRNA	+	47287216	47154429	noncoding	exon sense-overlapping	NM_014346	TBC1D22A	TBC1 domain family member 22A	+	47158517	47571342
ASHG19A3A038476	347.447	342.976	281.682	3297.38	4186.12	4219.76	4111.36	8.44729	8.42265	8.19488	11.7931	12.1748	12.1632	12.0494	P	P	P	P	M	M	M	chr9	ASS1P12	TTGAAATTTGCTGAGCTGGTGTATACCGGTTTCTGGCATAGCCCTGAGTGTGAATTTGTC	1227	ENST00000452496	Ensembl	+	32947220	32945993	noncoding	intergenic
ASHG19A3A019269	8.72642	6.81538	6.16042	22.0651	19.6401	22.458	31.0505	3.33139	3.36675	3.01411	4.25208	4.16464	4.34077	4.71206	A	A	A	P	M	M	M	chr21	CR624487	AACAATAACATCCAGGGAGTTCGTTTCTTGAGCAACGACCAGCTCTTTGCATAGCACGAA	1542	uc002yyn.1	UCSC_knowngene	+	41102607	41099681	noncoding	intergenic
ASHG19A3L0000403	52.5256	48.5839	39.995	75.2386	46.0715	32.0475	86.7401	5.85148	5.76884	5.52098	6.10929	5.44463	4.87634	6.25938	P	P	P	M	M	M	M	chr11	lincRNA-P2RY2	AGTCTTGTTCAGGGTCAGGGTGATGGCCTTTCCTATGCTAGATCACAGCCTTATATATCA	495	AI376773	lincRNA	+	72877184	72876689	noncoding	intergenic
ASHG19A3A048298	83.9972	73.5992	73.0957	79.4067	144.257	166.924	174.021	6.51683	6.32926	6.35451	6.19426	7.15401	7.34123	7.3089	P	P	P	M	M	M	M	chr1	RP11-488P3.1	TCTGTGAGATATCAAATAGAGAGGTGAAGCCTGCAGTAATAAAAAATACTGCCATAGCTA	1671	ENST00000433544	Ensembl	-	94241000	94218479	noncoding	intergenic
ASHG19A3A050999	7.94647	5.48155	5	47.1972	50.4276	44.3892	76.0754	3.19954	2.52095	2.39437	5.40555	5.57759	5.36656	6.06608	A	A	A	M	M	M	M	chr14	BC038792	TGAAGTTATGAAGAGATAGTTACTGGATCAAAATAGAAGAAATGATGCCTGGCAGCTAGA	364	uc001xsz.2	UCSC_knowngene	-	77547598	77514515	noncoding	intergenic
ASHG19A3L0003536	649.912	598.284	409.352	41.2014	85.2099	13.9239	104.163	9.2822	9.16177	8.71119	5.20015	6.36322	3.57864	6.53242	P	P	P	M	M	M	M	chr20	lincRNA-FAM110A	GTGCTGTGTGTGTGGAAACCCAAATATGACCGTAGAGGGTGGAGCCACAAAACCAAGCTG	447	BE244504	lincRNA	-	837565	837118	noncoding	intergenic
ASHG19A3A027940	142.038	155.418	127.342	42.6469	34.4703	34.3462	28.9464	7.23384	7.35334	7.11744	5.24947	5.00779	4.97906	4.60472	P	P	P	M	M	M	M	chr5	CTD-2001E22.2	CCAGGGTGTTATTTTCCGACATTGAGTCTTGTATATATCTTGAATGTCTATAAGCAAAGA	1799	ENST00000508179	Ensembl	+	9550721	9546311	noncoding	bidirectional	NM_003966	SEMA5A	semaphorin-5A precursor	-	9035137	9546233
ASHG19A3A029630	18.0013	15.3057	11.8738	183.677	198.781	134.046	213.458	4.33586	4.27361	3.84998	7.4504	7.63907	7.01126	7.62309	A	A	A	M	M	M	M	chr6	DAQB-335A13.8	GGTTTAAAAGAAAATGCCCATTGACTAATGAATGAATAAACAACATGTAGTGTATTTCTA	2835	ENST00000458236	Ensembl	-	29716770	29702804	noncoding	intergenic
ASHG19A3A032073	54.7318	49.8784	42.4808	76.1294	41.1679	60.8664	50.3204	5.91177	5.80419	5.6061	6.12745	5.27601	5.83499	5.44318	P	M	P	P	M	M	M	chr6		ATCTTTCTTTAGCTGAAAAAAGCTGACCTAAACTCCATAACCACTCCCAAGAGCTTGAGG	1483	AY927639	RNAdb	+	132321331	132319845	noncoding	intergenic
ASHG19A3L0000032	2105.13	2282.46	1611.27	3856.32	2026.9	2156.91	1587.26	10.8963	11.0166	10.5703	12.0202	11.116	11.1815	10.6702	P	M	P	P	M	M	M	chr1	lincRNA-PBX1-3	TGATTTTATGCTTTGAACATAAGGCTGGGTCCTTCAGCTCTCCTTCCCCTCTCAGAAACA	544	DB327252	lincRNA	-	165093350	165092806	noncoding	intergenic
ASHG19A3L0000152	299.758	290.469	226.686	481.768	296.193	237.525	248.92	8.24363	8.18944	7.89044	8.92755	8.24305	7.87736	7.86172	P	P	P	P	P	M	M	chr1	lincRNA-C1orf83	TTTGCATATGTGCCTGTGGATCTAATGTTACCCCCCACACCTCACGCGAGACTGTCTCCC	715	exon99-	lincRNA	-	54588155	54587441	noncoding
ASHG19A3L0002491	30.4063	22.4511	27.7029	37.869	25.2763	13.7137	29.3188	5.08668	4.74749	5.01603	5.07296	4.53939	3.55394	4.62569	A	P	P	P	M	A	M	chr2	lincRNA-SLC4A1AP	AAGGTGACTCTAAGGTCCTATCTAGCCTTTTGATACAACATGGCTGGCTCATTTCCCCAA	1883	AK124439	lincRNA	-	27938599	27929629	noncoding	intergenic
ASHG19A3L0000697	50.0862	40.7826	44.4806	56.0768	92.8632	65.8898	97.4374	5.78432	5.53539	5.67061	5.66027	6.49228	5.95995	6.42898	P	P	P	M	M	M	M	chr13	lincRNA-MBNL2-2	ATCTCATTCTTTCGAGAGCTATATCCTATAGAACCTGCCCCAAATGAAGGAGATCAGCCT	508	AA757150	lincRNA	+	97788497	97787992	noncoding	intergenic
ASHG19A3A025593	80.3819	74.1452	73.3559	73.1541	89.9596	79.5995	88.6158	6.46029	6.34003	6.35932	6.06457	6.44067	6.23067	6.28915	P	P	P	M	M	M	M	chr4	LOC550112	TAGGATAAACTTATGAAAAGAAAGGAGTAGCAGTCCCACAGACAAAGCATCCAGCCCCTG	2301	NR_015439	RefSeq_NR	+	68588220	68566995	noncoding	bidirectional	NM_018227	UBA6	ubiquitin-like modifier-activating enzyme 6	-	68481478	68566889
ASHG19A3A050802	1634.31	977.472	1613.28	495.922	2146.36	601.609	2473.03	10.53	9.8318	10.5712	8.97904	11.2013	9.28551	11.3204	P	P	P	M	M	M	M	chr1	RP11-423O2.2	AAGCCGCTGCCTGATATCAACACTTTGTAGATGTAGTATGACTATTCTTGTATGTTTCTA	593	ENST00000433591	Ensembl	-	142791175	142790582	noncoding	intergenic
ASHG19A3L0003482	55.9678	44.2471	43.1527	45.4404	88.6851	44.0036	94.9829	5.94312	5.64367	5.62841	5.3498	6.42046	5.35278	6.39249	P	P	P	M	M	M	M	chr2	lincRNA-MTX2-4	AGGAAATCAAAGAGCAACAGTGAGGAGTCTAGTCCTGCCTGGTATATCACATACCACAGT	6464	chr2:177245637-177252100-	lincRNA	-	177252100	177245637	noncoding	intergenic
ASHG19A3A034290	85.1023	75.9987	73.8993	43.8104	46.3542	48.6409	46.2118	6.53377	6.37441	6.36936	5.29482	5.45347	5.50285	5.31593	P	P	P	M	M	M	M	chr7	AC073115.7	CCTAAAAAATGGAAGCACAAACTGTACAACAAATACTCTCCATTCAAGTTGAAGTTCTCA	532	ENST00000436056	Ensembl	+	46040497	46030503	noncoding	intergenic
ASHG19A3A018856	94.19	81.8002	89.9705	141.529	144.441	133.054	168.246	6.67624	6.47375	6.64248	7.04836	7.15576	7.002	7.25759	P	P	P	M	M	M	M	chr21	AP000696.2	ATGGGTTTATCTTTTGGGACCAAGACATTGGGTCCCTACATGTTTTCCCCTACCCTTCTT	1133	ENST00000457669	Ensembl	-	38009331	38004978	noncoding	intergenic
ASHG19A3A018495	266.61	283.345	245.947	151.875	199.401	226.05	215.685	8.07718	8.15834	8.00197	7.15401	7.64361	7.79935	7.63731	P	P	P	M	M	M	M	chr20	CR612603	AGTTAATTCAGTGGCTTAAAGAAACCAAACCTACCCACAACGCTTGACCTCCCATTGATC	2570	uc002xyu.1	UCSC_knowngene	+	56287808	56285238	noncoding	natural antisense	NM_199171	PMEPA1	transmembrane prostate androgen-induced protein	-	56223451	56286541
ASHG19A3A018495	266.61	283.345	245.947	151.875	199.401	226.05	215.685	8.07718	8.15834	8.00197	7.15401	7.64361	7.79935	7.63731	P	P	P	M	M	M	M	chr20	CR612603	AGTTAATTCAGTGGCTTAAAGAAACCAAACCTACCCACAACGCTTGACCTCCCATTGATC	2570	uc002xyu.1	UCSC_knowngene	+	56287808	56285238	noncoding	natural antisense	NM_199169	PMEPA1	transmembrane prostate androgen-induced protein	-	56223451	56285625
ASHG19A3A018495	266.61	283.345	245.947	151.875	199.401	226.05	215.685	8.07718	8.15834	8.00197	7.15401	7.64361	7.79935	7.63731	P	P	P	M	M	M	M	chr20	CR612603	AGTTAATTCAGTGGCTTAAAGAAACCAAACCTACCCACAACGCTTGACCTCCCATTGATC	2570	uc002xyu.1	UCSC_knowngene	+	56287808	56285238	noncoding	bidirectional	NM_020182	PMEPA1	transmembrane prostate androgen-induced protein	-	56223451	56285031
ASHG19A3A018495	266.61	283.345	245.947	151.875	199.401	226.05	215.685	8.07718	8.15834	8.00197	7.15401	7.64361	7.79935	7.63731	P	P	P	M	M	M	M	chr20	CR612603	AGTTAATTCAGTGGCTTAAAGAAACCAAACCTACCCACAACGCTTGACCTCCCATTGATC	2570	uc002xyu.1	UCSC_knowngene	+	56287808	56285238	noncoding	natural antisense	NM_199170	PMEPA1	transmembrane prostate androgen-induced protein	-	56223451	56285625
ASHG19A3A007368	27.2704	21.9355	23.5894	24.2938	37.6461	35.8877	37.4673	4.93698	4.71814	4.78594	4.40056	5.14034	5.04717	4.99858	A	P	P	M	M	M	M	chr21	C21orf88	GAATGCTGGAGCAATACTTAAATAGGGGAGGTCAGAAATCTCACGGGCTCTGCTGGCTTC	1469	NR_026542	RefSeq_NR	-	40984749	40969076	noncoding	intergenic
ASHG19A3L0000453	101.307	113.386	91.0896	29.3367	19.1998	24.8327	31.2721	6.77641	6.92189	6.65561	4.69021	4.13529	4.49387	4.72303	P	P	P	M	M	M	M	chr12	lincRNA-RIMBP2-1	AGAGATGACTTTTCTAGAGAAGAGTAGAAACACAGCGGCAGAAACACAGCTCTGCACTTC	3902	BC007632	lincRNA	-	131200826	130916193	noncoding	exon sense-overlapping	NM_015347	RIMBP2	RIMS-binding protein 2	-	130880680	131002410
ASHG19A3L0000532	67.2689	62.3027	66.0253	271.207	69.3417	69.82	71.8274	6.20426	6.10333	6.20803	8.04046	6.06075	6.04752	5.97554	P	P	P	P	M	M	M	chr12	lincRNA-GLIPR1L2	TGTGTCTGGAACGTTTTGCTATCCACCTGCTCTCTGTAGCCATGTTTTGGCTTCAGTTAT	485	AI910857	lincRNA	-	75842332	75841852	noncoding	intergenic
ASHG19A3L0000925	31.851	18.4803	23.3454	38.1064	25.9451	30.8699	52.8508	5.15135	4.50894	4.77506	5.08285	4.57662	4.82184	5.52081	A	P	P	M	M	M	M	chr17	lincRNA-SOX9	CTTTAAAAGCAACATTTTAAAAATGGGGATCCGTCCAGCTGTGTTCTGAGCTTGGGCAGC	707	BM678241	lincRNA	+	69000634	68774744	noncoding	intergenic
ASHG19A3L0003088	38.3932	21.1604	21.0146	23.0567	29.6083	30.7783	37.4654	5.41096	4.67652	4.63507	4.32046	4.78049	4.81743	4.99833	A	P	P	M	M	M	M	chr5	lincRNA-MRPL36-2	TTGGCAGGAATCTCTTTTATTCACTTTCCCCAAGATGTCTTCTTGGGTCTTCCGACAGTG	508	BE501942	lincRNA	+	1782205	1780805	noncoding	intergenic
ASHG19A3A043920	13.8196	6.64387	11.5501	23.0836	23.9957	28.3262	30.1339	3.9635	3.33754	3.81534	4.32276	4.46152	4.69177	4.66413	A	A	A	M	M	M	M	chr1	PPIEL	AATATCTTATGTGGGCTCAGGTATTTGTGATTGCTGCTGAGCAAGGCGGATATCTGAGGT	2640	NR_003929	RefSeq_NR	-	40025370	39987952	noncoding	natural antisense	NM_181809	BMP8A	bone morphogenetic protein 8A precursor	+	39957317	39995541
ASHG19A3A045027	35.2512	39.2811	35.1883	47.1165	60.6933	62.4045	68.7564	5.29795	5.48689	5.34172	5.40318	5.86257	5.87357	5.91465	P	P	P	M	M	M	M	chr11	EF565102	AATGACGGGAGTGTGAGATCCACCACATGGCGAGGCACCCCAGGAACCTGTTTTCTTCTT	403	uc009yjc.1	UCSC_knowngene	-	27656128	27645540	noncoding	intergenic
ASHG19A3A014240	1075.2	930.915	741.796	754.059	634.323	467.551	580.883	9.95172	9.76189	9.50485	9.61237	9.39989	8.90004	9.15472	P	P	P	P	M	M	M	chr2	AC024704.2	TGAATCACTCCCCCACTGAGGAAGAAACCATCTGTGGAAAAGACTGTATAAGGTACTTCC	416	ENST00000435407	Ensembl	-	114588696	114586966	noncoding	intergenic
ASHG19A3A051572	1736.54	1665.13	1308.79	879.892	803.485	755.826	903.748	10.6122	10.5576	10.2792	9.84951	9.75372	9.63113	9.83161	P	M	P	P	M	M	M	chr14	LOC145474	ATATATTCTTCAGTGTGATTTAGGTGAGTCAGGAATTTTTCCTCTGGAGACTGCCTAAAT	1859	NR_027046	RefSeq_NR	+	71956418	71954577	noncoding	intergenic
ASHG19A3A048668	95.3311	107.176	92.8452	74.7952	26.3917	73.2778	33.6377	6.69221	6.84557	6.68234	6.09886	4.60455	6.11654	4.83362	P	P	P	P	M	M	M	chr12		AAAGACCACCCTTTTGTCCATCTTCTTCACATGGGTGGATGTGAGAAAAGTTTCTCTCCC	2629	AK022887	RNAdb	+	54516023	54513394	noncoding	intergenic
ASHG19A3A032777	26062.8	26906.9	24507.2	14993.5	16067.8	17047.5	13920.9	14.4196	14.4952	14.3951	14.043	14.1749	14.2179	13.8486	P	P	P	P	M	M	M	chr7	AC073115.5	TCACTTCCTAGATGAGGAAGTTAAACTCATCAAGAAGATGGGTGACCACCTGACCAACCT	532	ENST00000455449	Ensembl	-	46037670	46037138	noncoding	intergenic
ASHG19A3L0000808	4120.19	4233.05	3700.45	4880.28	4923.47	4905.48	5135.67	11.8437	11.8982	11.7552	12.3751	12.4085	12.3792	12.3775	P	P	P	P	P	M	M	chr15	lincRNA-ZFP106	TTTTCCAGGAAAGGCTCCAGTGGTTCTTACTTGATCCAAAAAATGTCAAGAATTAATCTA	5684	AK226132	lincRNA	-	42783303	42707320	noncoding	exon sense-overlapping	NM_022473	ZFP106	zinc finger protein 106 homolog	-	42705020	42749730
ASHG19A3A023597	25.2234	26.4023	29.4923	30.0307	45.0791	38.6486	71.6854	4.82599	4.95946	5.10362	4.72566	5.41277	5.15952	5.97229	A	P	P	M	M	M	M	chr3	SOX2OT	TCGCTTTTTTACCTGCCAATCAAACTGCTACAAGACAACACCCTGATCTGGCATGGACAT	2529	NR_004053	RefSeq_NR	+	181459003	181328150	noncoding	intron sense-overlapping	NM_003106	SOX2	transcription factor SOX-2	+	181429711	181432223
ASHG19A3A033174	185.966	192.011	170.557	457.514	491.365	498.176	528.988	7.60186	7.6359	7.51394	8.84418	9.01442	9.00548	9.00727	P	P	P	M	M	M	M	chr7	AC006378.3	GGGTACAAACTGTATTTCCAACACTTCTAGCCCTATATATACCTGTCAATGATATTATAC	314	ENST00000424151	Ensembl	-	93597702	93594721	noncoding	intergenic
ASHG19A3L0001991	20.2951	21.2692	18.1917	28.3207	32.7372	28.7207	34.4922	4.51051	4.68273	4.43294	4.63658	4.92935	4.71247	4.87456	A	P	P	P	M	M	M	chr8	lincRNA-FBXO32-1	CAAGCAAACTTACCCTGTCTATATTTACAAGGTAAAAACCCCAGAAGCACTACAGCACAC	533	DB340652	lincRNA	-	124629717	124629184	noncoding	intergenic
ASHG19A3A053974	30.3495	19.6458	19.0009	79.8614	72.4093	76.9172	76.8611	5.08376	4.58441	4.49741	6.20338	6.11822	6.18271	6.07983	A	P	P	P	M	M	M	chr16		CTGAGTTCTTCTATACTTCACCATGGATACATGAACCTTAGCCCTAATGGAGCCTTAGAA	2030	AK021766	misc_RNA	-	79711612	79709581	noncoding	intergenic
ASHG19A3L0003312	69.0288	61.7498	60.2876	55.9884	36.3901	28.9224	42.2084	6.24012	6.09113	6.08632	5.65801	5.08762	4.72335	5.18114	P	P	P	P	M	M	M	chr3	lincRNA-ZPLD1-1	TTTTTTAGCGACAGAAAATCTCACCCTATATCCAATGGGGGTTCACCACCATGATGGCGT	961	BE796744	lincRNA	-	104626311	104348945	noncoding	intergenic
ASHG19A3A042850	23.081	21.8148	10.2603	33.4361	18.6862	16.0613	45.588	4.69854	4.71216	3.65135	4.88474	4.09556	3.81652	5.29472	A	P	A	M	M	M	M	chr10	RP11-491H19.1	AAAGGTAGCTAGATGGAGGATGGTTCTCCTCATTCCGCAGATGATGAACTTGAAACCAGT	477	ENST00000441001	Ensembl	-	63581004	63541513	noncoding	intergenic
ASHG19A3A043572	218.419	209.167	222.933	402.432	185.899	217.404	385.682	7.81429	7.75504	7.87009	8.6443	7.53612	7.74228	8.52229	P	P	P	P	M	M	P	chr10	RP11-554I8.2	TGACTTTTGGAAATCTGATTGACTGGCACACTCTCTCTGCCTCTTTCTTTCTCAACATTT	917	ENST00000417112	Ensembl	+	6780988	6779343	noncoding	intergenic
ASHG19A3A049421	34.7806	30.3882	35.4403	39.1727	64.2872	50.9543	56.4564	5.27827	5.14418	5.35211	5.12549	5.94665	5.57069	5.61878	P	P	P	M	M	M	M	chr13	RP11-141M1.3	TAAAAATGTAATGGAATTGCAGAGTTGTTGGCATTCAGATGTGTAGGTGGTGGGTGGCAA	844	ENST00000454681	Ensembl	-	34250905	33929342	noncoding	intergenic
ASHG19A3L0002300	108.967	91.0724	95.9655	93.8371	138.381	76.687	159.015	6.87219	6.6252	6.73141	6.44333	7.09222	6.1776	7.17603	P	P	P	M	M	M	M	chrX	lincRNA-CASK-2	TCATGGTTCTTCAGTGTCAAATGACTTTCCCCTCATTTCTGGAATCCATACGTAGGCATA	461	BG925695	lincRNA	-	43134491	43134151	noncoding	intergenic
ASHG19A3L0001445	41.3163	32.1408	38.5593	39.0292	41.0523	42.9152	42.0157	5.51134	5.22198	5.47377	5.12024	5.27199	5.31477	5.17373	P	P	P	P	M	M	M	chr4	lincRNA-RAB28-2	TTTTTCACTTGTCCAAACATGAAGCACACTTGCTTCTCCAGGTGTGGCATTGCAGAAAGC	570	BY798287	lincRNA	+	11517873	11517303	noncoding	intergenic
ASHG19A3L0000103	453.793	432.159	400.085	710.923	1110.92	689.745	1192.79	8.80794	8.73297	8.67935	9.51497	10.231	9.49632	10.2467	P	P	P	P	M	M	M	chr1	lincRNA-TOMM20-1	ATTTACTTGAAAGAGACCTCATGCCAAAAAATGCATAGCATCATCCCCCACCTGCTCAGT	521	BF511988	lincRNA	+	235062598	235062091	noncoding	intergenic
ASHG19A3A015641	132.926	139.229	130.648	145.325	167.895	179.241	164.482	7.14121	7.20331	7.15484	7.08889	7.38544	7.45051	7.22566	P	P	P	M	M	M	M	chr2		CCCAATCCGTCATACTGACTGAGGTTCTTAACTCCTAATTAACTTAATTAAATTAACTCC	2107	AK122979	misc_RNA	+	48768491	48766384	noncoding	intron sense-overlapping	NM_001198593	STON1-GTF2A1L	STON1-GTF2A1L protein isoform 2	+	48757063	49003656
ASHG19A3A015641	132.926	139.229	130.648	145.325	167.895	179.241	164.482	7.14121	7.20331	7.15484	7.08889	7.38544	7.45051	7.22566	P	P	P	M	M	M	M	chr2		CCCAATCCGTCATACTGACTGAGGTTCTTAACTCCTAATTAACTTAATTAAATTAACTCC	2107	AK122979	misc_RNA	+	48768491	48766384	noncoding	intron sense-overlapping	NM_006873	STON1	stonin-1	+	48757307	48825654
ASHG19A3A015641	132.926	139.229	130.648	145.325	167.895	179.241	164.482	7.14121	7.20331	7.15484	7.08889	7.38544	7.45051	7.22566	P	P	P	M	M	M	M	chr2		CCCAATCCGTCATACTGACTGAGGTTCTTAACTCCTAATTAACTTAATTAAATTAACTCC	2107	AK122979	misc_RNA	+	48768491	48766384	noncoding	intron sense-overlapping	NM_001198595	STON1	stonin-1	+	48757307	48825654
ASHG19A3A034077	109.332	101.606	101.115	158.852	80.4832	88.4846	79.3082	6.87567	6.77515	6.80091	7.22342	6.27901	6.38629	6.12987	P	P	P	P	M	M	P	chr7	LOC441204	ACTCTGAATCCAGTGCTCTTTCTACTTCACCATAGACACATGCCCCTTGAGTATAAGGGA	1649	NR_015364	RefSeq_NR	+	26535982	26443106	noncoding	intergenic
ASHG19A3L0003323	17.1471	9.69053	21.0674	39.7739	16.7902	18.781	19.0153	4.26014	3.73743	4.63784	5.14687	3.91907	4.06484	3.94372	A	A	P	P	P	M	P	chr6	lincRNA-C6orf118-2	AAACTACTAATGATTCAGAGAATTAGGCCTGTAGATCTCCATTTTCTCAACTTGTTTCAC	465	CK430718	lincRNA	+	164403679	164403207	noncoding	intergenic
ASHG19A3L0003197	58.9653	58.6746	39.0108	41.5709	42.1755	33.2021	42.5505	6.01308	6.02106	5.49012	5.21171	5.31094	4.9262	5.19453	P	P	P	P	M	M	M	chr8	lincRNA-ATP6V1C1-2	ACAAAAAACCAAGAAAGAAAGTGGGGGGTGGGATACTCTTACATCAAGAACCGCTTCTCC	834	BU533451	lincRNA	-	104092160	104091398	noncoding	intergenic
ASHG19A3L0001272	23.0806	17.2523	21.3084	70.6605	14.1506	25.0741	35.9376	4.69839	4.42424	4.65155	6.0138	3.64561	4.50834	4.93952	A	P	P	P	A	M	P	chr21	lincRNA-POTED-1	AACTTCAGACGCGAGAGTGTTGATTATACACTCAAGGCCCCACATTAGGGAAGTTTGTGA	893	BG180467	lincRNA	+	11139834	11139159	noncoding	intergenic
ASHG19A3L0003244	24.1015	20.969	21.6477	57.8509	13.6447	28.8777	68.6155	4.76166	4.66523	4.67211	5.70865	3.58028	4.72098	5.91208	A	P	P	P	A	M	P	chr12	lincRNA-ALG10B-4	GGGTTTGGTCATTATTAGGATGAACCATATACTATTGCCTCATTCAGGTCAAAACTATAA	25332	chr12:38862405-38887736-	lincRNA	-	38887736	38862405	noncoding	intergenic
ASHG19A3L0000181	67.1553	46.18	65.4608	99.9671	86.0824	63.6116	104.503	6.20131	5.7039	6.19724	6.53229	6.37731	5.90433	6.53835	P	P	P	P	M	M	M	chr1	lincRNA-LMO4-3	GTTTCTCTTTTCTCTCTGAGAATGTTAGACCTCTGATCTAATTCTCCACTGCTTCCTGCT	1152	AK309032	lincRNA	+	87717014	87678351	noncoding	intergenic
ASHG19A3L0001078	387.857	372.343	372.681	801.005	828.405	841.162	914.604	8.59457	8.5376	8.58581	9.70534	9.79653	9.7865	9.85024	P	P	P	P	M	M	M	chr2	lincRNA-ARHGAP15	TTCTAGTCGAAGAATTGAATTTTACAAAGAATCCAAGCAACAGGCTCTGTCCAATATGAA	577	DC428746	lincRNA	+	143986326	143828536	noncoding	exon sense-overlapping	NM_018460	ARHGAP15	rho GTPase-activating protein 15	+	143886898	144525921
ASHG19A3L0001667	35.5796	23.3604	28.0532	21.6416	43.5334	16.7569	45.9041	5.31079	4.8017	5.03291	4.221	5.35738	3.88369	5.30469	A	P	P	P	M	M	P	chr5	lincRNA-RAB3C-2	AATGGCTATCCTCCATCACAGCTGAAGAATGATCACACAGAGAACCGAGAAATGAGTCTC	14201	chr5:58234093-58248293-	lincRNA	-	58248293	58234093	noncoding	intergenic
ASHG19A3L0000859	20.2544	22.3335	25.2958	27.969	33.4162	33.4816	43.9132	4.50808	4.74178	4.88751	4.61816	4.95874	4.93832	5.24114	A	P	P	P	M	M	M	chr16	lincRNA-ERCC4	AGTTTATGGGTCACTTCTTTTTTCTAGCAGATGCGGTTGGTGCCAGTGTCACTTTCCTTG	582	BU632228	lincRNA	+	13453940	13453085	noncoding	intergenic
ASHG19A3A045566	78.1928	86.4085	79.4167	185.826	188.467	179.785	204.503	6.42295	6.54711	6.47215	7.46522	7.55636	7.4561	7.55974	P	P	P	P	M	M	M	chr11		TGTCCTCTTTTTACTGAAATAGGGGCCCTTGTTGATGGTAGTCACTGCCCATGCTGTTTA	2007	AK129753	misc_RNA	-	86622038	86620031	noncoding	intergenic
ASHG19A3L0003363	59.9555	81.5448	59.1448	37.5481	38.4304	48.6418	39.3547	6.03442	6.46908	6.06175	5.05984	5.17188	5.50298	5.07107	P	P	P	M	M	M	M	chr18	lincRNA-VPS4B	GAGCCAATTCTCTATGAATGAGACCCCATGATATCTAAATTCCATTGGTAAATTTACTTC	605	BF030551	lincRNA	+	61038945	61038344	noncoding	intergenic
ASHG19A3A031817	463.492	386.603	356.161	296.721	302.391	244.386	327.963	8.83383	8.584	8.52012	8.1776	8.27313	7.92319	8.27786	P	P	P	P	P	P	P	chr6	RP1-72A23.1	TTCGTTGTGGTTGGAGTTAATGACACTGAGAACAAGATGGCTATTTATGAATTCATTCAT	482	ENST00000403367	Ensembl	+	89769828	89769346	noncoding	intergenic
ASHG19A3A029430	119.216	112.968	94.702	195.529	81.5043	128.096	89.5331	6.99744	6.91678	6.71191	7.54093	6.29958	6.94242	6.30591	P	P	P	P	M	P	P	chr6	RP11-359N11.1	TAGGCTCTGCAAATTTCATCCCCACCTTTGGCCCTTCAGGCCTAGGGCAAGTCACAGCTC	470	ENST00000455973	Ensembl	-	14231801	14230005	noncoding	intergenic
ASHG19A3A046958	16.1773	7.53954	13.0202	43.6584	37.6973	39.7353	45.4084	4.17859	3.47281	3.97242	5.28987	5.14136	5.19949	5.28885	A	A	A	P	P	M	P	chr11		GAGACAGAAGAACTAAAACTCAGAGTGACCACCAATGCAGCTATGAAACAGGTGGCAACA	883	BC029570	misc_RNA	+	112412637	112263840	noncoding	intergenic
ASHG19A3A010912	1433.55	1346.37	1143.33	2675.43	2711.94	2300.14	2961.64	10.3486	10.2667	10.0963	11.4866	11.5457	11.2796	11.5912	P	P	P	P	P	M	M	chr19	PLAC2	CAGCTTGGAACTAGATACAGAAATGCTGTTTTGAGAGTGTACTGAATAAAAGATTACATG	3693	NR_027064	RefSeq_NR	-	5568005	5558179	noncoding	intergenic
ASHG19A3A038785	86.9897	74.0639	70.6931	90.1091	124.095	105.606	141.913	6.56299	6.33851	6.3045	6.38621	6.92913	6.65222	7.00813	P	P	P	P	P	P	P	chr9		CTGCTTCATCTGATTAACACACACACAAGAAAGAAAAATTACACCCACAGAAAACTGAGT	2114	AK125162	misc_RNA	+	77308073	77305960	noncoding	intergenic
ASHG19A3L0000199	45.073	30.0753	44.0927	49.7667	67.9338	54.3348	114.168	5.63895	5.12948	5.65922	5.48943	6.02976	5.6691	6.67401	P	P	P	P	M	P	P	chr10	lincRNA-HABP2-1	CTTTCTTTTTTGACAATTATCTTATTGTCTTTGTGAAGCGATTCGTGCCTCCTGTGAACA	591	BX501243	lincRNA	+	115149054	115148152	noncoding	intergenic
ASHG19A3A040695	19.6379	5.36428	18.2186	13.8262	23.4801	17.8715	22.0363	4.46412	2.33947	4.43472	3.5124	4.42906	3.98458	4.18142	A	P	P	P	P	M	A	chrX	RP1-122K4.2	CCAGCTCCTTCTCTGGAGAAGTTAATTATCAAATCCTAGCAAGAAGGGCAAGTGGTGATG	696	ENST00000448948	Ensembl	+	13982023	13973511	noncoding	intergenic
ASHG19A3L0002225	34039.9	37670.6	32418.2	9515.4	9974.34	10194.6	10660.8	14.8027	14.9871	14.8201	13.3719	13.4609	13.4635	13.4545	P	P	P	P	M	P	M	chr9	lincRNA-PDCD1LG2-2	GGAGGTGCTCTAAATAACTTTTAGATTTCCTCTCTCTGTGTGCATTACCAATATCTAAGT	1660	BC036853	lincRNA	-	5630071	5357968	noncoding	exon sense-overlapping	NM_018465	C9orf46	transmembrane protein C9orf46	-	5357966	5437937
ASHG19A3L0002225	34039.9	37670.6	32418.2	9515.4	9974.34	10194.6	10660.8	14.8027	14.9871	14.8201	13.3719	13.4609	13.4635	13.4545	P	P	P	P	M	P	M	chr9	lincRNA-PDCD1LG2-2	GGAGGTGCTCTAAATAACTTTTAGATTTCCTCTCTCTGTGTGCATTACCAATATCTAAGT	1660	BC036853	lincRNA	-	5630071	5357968	noncoding	intronic antisense	NM_025239	PDCD1LG2	programmed cell death 1 ligand 2 precursor	+	5510544	5571282
ASHG19A3L0002225	34039.9	37670.6	32418.2	9515.4	9974.34	10194.6	10660.8	14.8027	14.9871	14.8201	13.3719	13.4609	13.4635	13.4545	P	P	P	P	M	P	M	chr9	lincRNA-PDCD1LG2-2	GGAGGTGCTCTAAATAACTTTTAGATTTCCTCTCTCTGTGTGCATTACCAATATCTAAGT	1660	BC036853	lincRNA	-	5630071	5357968	noncoding	intronic antisense	NM_001135920	KIAA1432	protein RIC1 homolog isoform b	+	5629118	5769454
ASHG19A3L0002225	34039.9	37670.6	32418.2	9515.4	9974.34	10194.6	10660.8	14.8027	14.9871	14.8201	13.3719	13.4609	13.4635	13.4545	P	P	P	P	M	P	M	chr9	lincRNA-PDCD1LG2-2	GGAGGTGCTCTAAATAACTTTTAGATTTCCTCTCTCTGTGTGCATTACCAATATCTAAGT	1660	BC036853	lincRNA	-	5630071	5357968	noncoding	intronic antisense	NM_001206557	KIAA1432	protein RIC1 homolog isoform c	+	5629118	5776556
ASHG19A3L0002225	34039.9	37670.6	32418.2	9515.4	9974.34	10194.6	10660.8	14.8027	14.9871	14.8201	13.3719	13.4609	13.4635	13.4545	P	P	P	P	M	P	M	chr9	lincRNA-PDCD1LG2-2	GGAGGTGCTCTAAATAACTTTTAGATTTCCTCTCTCTGTGTGCATTACCAATATCTAAGT	1660	BC036853	lincRNA	-	5630071	5357968	noncoding	intronic antisense	NM_020829	KIAA1432	protein RIC1 homolog isoform a	+	5629118	5776556
ASHG19A3L0002225	34039.9	37670.6	32418.2	9515.4	9974.34	10194.6	10660.8	14.8027	14.9871	14.8201	13.3719	13.4609	13.4635	13.4545	P	P	P	P	M	P	M	chr9	lincRNA-PDCD1LG2-2	GGAGGTGCTCTAAATAACTTTTAGATTTCCTCTCTCTGTGTGCATTACCAATATCTAAGT	1660	BC036853	lincRNA	-	5630071	5357968	noncoding	intronic antisense	NM_014143	CD274	programmed cell death 1 ligand 1 precursor	+	5450502	5470567
ASHG19A3A044659	4272.7	4889.94	4108.63	2094.89	2426.76	2513.49	2744.17	11.895	12.102	11.904	11.1344	11.382	11.4113	11.4637	P	P	P	P	M	P	P	chr10	CTAGE7	CTGGCAATATTTTTGCTCTCTTCAAAAGTAATTCTGACTGATCTCATTTCAAGTAACTGC	2823	ENST00000417351	Ensembl	+	131907095	131904272	noncoding	intergenic
ASHG19A3A026163	935.894	1097.56	850.2	384.976	354.63	375.031	435.969	9.76947	9.97993	9.69627	8.57315	8.5061	8.5598	8.70542	P	P	P	P	M	P	M	chr4		GTGGCTTTTACTGTCAAAGATTGTGTAAGCTAAATTATCTGGCAAAATTTTGCTTTCCAG	2882	BC034819	NRED	+	153460292	153457444	noncoding	intergenic
ASHG19A3A041539	91.7088	115.629	99.3256	156.465	124.47	133.411	153.504	6.63512	6.94849	6.7761	7.20123	6.93324	7.00511	7.12697	P	P	P	P	M	P	M	chrX	RP5-842K24.2	TATTCTCCTTGCTGGTATTTCTTCCACTTGCTATTTTGCTGAGAGATGCATGCAAACTAC	3474	ENST00000441399	Ensembl	+	131566890	131352534	noncoding	bidirectional	NM_021183	RAP2C	ras-related protein Rap-2c precursor	-	131337052	131352189
ASHG19A3A041539	91.7088	115.629	99.3256	156.465	124.47	133.411	153.504	6.63512	6.94849	6.7761	7.20123	6.93324	7.00511	7.12697	P	P	P	P	M	P	M	chrX	RP5-842K24.2	TATTCTCCTTGCTGGTATTTCTTCCACTTGCTATTTTGCTGAGAGATGCATGCAAACTAC	3474	ENST00000441399	Ensembl	+	131566890	131352534	noncoding	intronic antisense	NM_001170701	MBNL3	muscleblind-like protein 3 isoform 3	-	131503342	131547603
ASHG19A3A041539	91.7088	115.629	99.3256	156.465	124.47	133.411	153.504	6.63512	6.94849	6.7761	7.20123	6.93324	7.00511	7.12697	P	P	P	P	M	P	M	chrX	RP5-842K24.2	TATTCTCCTTGCTGGTATTTCTTCCACTTGCTATTTTGCTGAGAGATGCATGCAAACTAC	3474	ENST00000441399	Ensembl	+	131566890	131352534	noncoding	intronic antisense	NM_001170703	MBNL3	muscleblind-like protein 3 isoform 5	-	131503342	131547636
ASHG19A3A041539	91.7088	115.629	99.3256	156.465	124.47	133.411	153.504	6.63512	6.94849	6.7761	7.20123	6.93324	7.00511	7.12697	P	P	P	P	M	P	M	chrX	RP5-842K24.2	TATTCTCCTTGCTGGTATTTCTTCCACTTGCTATTTTGCTGAGAGATGCATGCAAACTAC	3474	ENST00000441399	Ensembl	+	131566890	131352534	noncoding	intronic antisense	NM_133486	MBNL3	muscleblind-like protein 3 isoform 2	-	131503342	131573718
ASHG19A3A041539	91.7088	115.629	99.3256	156.465	124.47	133.411	153.504	6.63512	6.94849	6.7761	7.20123	6.93324	7.00511	7.12697	P	P	P	P	M	P	M	chrX	RP5-842K24.2	TATTCTCCTTGCTGGTATTTCTTCCACTTGCTATTTTGCTGAGAGATGCATGCAAACTAC	3474	ENST00000441399	Ensembl	+	131566890	131352534	noncoding	intronic antisense	NM_018388	MBNL3	muscleblind-like protein 3 isoform 1	-	131503342	131573718
ASHG19A3A041539	91.7088	115.629	99.3256	156.465	124.47	133.411	153.504	6.63512	6.94849	6.7761	7.20123	6.93324	7.00511	7.12697	P	P	P	P	M	P	M	chrX	RP5-842K24.2	TATTCTCCTTGCTGGTATTTCTTCCACTTGCTATTTTGCTGAGAGATGCATGCAAACTAC	3474	ENST00000441399	Ensembl	+	131566890	131352534	noncoding	intronic antisense	NM_001170702	MBNL3	muscleblind-like protein 3 isoform 4	-	131503342	131547603
ASHG19A3A041539	91.7088	115.629	99.3256	156.465	124.47	133.411	153.504	6.63512	6.94849	6.7761	7.20123	6.93324	7.00511	7.12697	P	P	P	P	M	P	M	chrX	RP5-842K24.2	TATTCTCCTTGCTGGTATTTCTTCCACTTGCTATTTTGCTGAGAGATGCATGCAAACTAC	3474	ENST00000441399	Ensembl	+	131566890	131352534	noncoding	intronic antisense	NM_001170704	MBNL3	muscleblind-like protein 3 isoform 5	-	131503342	131623996
ASHG19A3L0002292	25.2886	32.3682	18.1217	18.3547	183.724	51.0846	44.7448	4.83108	5.23127	4.42672	3.96994	7.5174	5.57391	5.27007	P	P	P	P	M	M	P	chrX	lincRNA-MID1IP1-2	TTAATTAGGTGCCTAACCTTGATTGCAGGGAGTCAGGATATCTCTCCAACTCCACCTTCT	80451	chrX:38863681-38944131-	lincRNA	-	38944131	38863681	noncoding	intergenic
ASHG19A3L0001219	138.214	125.688	102.2	50.2845	32.0891	49.2731	35.585	7.19501	7.06299	6.81545	5.50546	4.90057	5.52279	4.92357	P	P	P	P	P	P	P	chr2	lincRNA-TACR1-1	AAATGAATAGCTGATACTCCTCCTTCATCAGAGAACTTGTGAGGCAGAAAGCGGGGAAAG	720	BX101700	lincRNA	-	75555760	75555040	noncoding	intergenic
ASHG19A3A008475	3516.13	3351.18	2962.69	1432.42	1349.82	1379.81	1327.75	11.6127	11.5571	11.4392	10.5861	10.5293	10.5373	10.415	P	P	P	P	P	P	P	chr17	DQ589083	AACTCTGCTTAGGATTATTTCATTGATCCCCAGGGTCCAATTGCCCAGTGCTCAGTCAAA	1661	uc010wkl.1	UCSC_knowngene	-	45127901	45126240	noncoding	intergenic
ASHG19A3L0000752	140.586	122.454	126.626	166.298	90.8248	123.278	195.097	7.21912	7.0285	7.11016	7.29565	6.45556	6.88649	7.48885	P	P	P	P	M	P	P	chr14	lincRNA-GPHN-4	GTAGAAAAGATTTGCTCATCCCAAGTCAAGATGTTCTCCCATGTTTTTTCTTAGCAGCTT	15051	chr14:66457497-66472547+	lincRNA	+	66472547	66457497	noncoding	intergenic
ASHG19A3L0000937	1244.07	914.544	1106.38	780.019	875.896	432.769	973.459	10.147	9.74197	10.0498	9.66369	9.8831	8.77932	9.94397	P	P	P	P	P	P	P	chr18	lincRNA-RBBP8-2	AAGATGTCAAGGACACACACCAAGCCCATCTTGTTCAAAACCTAATGAGCTCCCCTCCCT	93	exon1959+	lincRNA	+	20043885	20043793	noncoding
ASHG19A3A014203	1553.31	1418.42	1465.85	384.213	624.352	385.229	727.969	10.4555	10.3368	10.4334	8.57004	9.37648	8.60129	9.49448	P	P	P	P	M	M	M	chr2	LOC541471	TTATAAATCTTCAATACATCCTGTCCCCCTAAAACGGCATCTGGGTCTTTTGAGGGTTAA	809	NR_015395	RefSeq_NR	-	112252692	112124590	noncoding	intergenic
ASHG19A3L0002896	73.9763	72.0296	60.2908	67.9305	72.3326	69.6115	93.5976	6.34255	6.30054	6.08664	5.95209	6.11691	6.04223	6.37061	P	P	P	P	P	P	P	chr2	lincRNA-GPR45	GGACAAACTTGTTTATTTGTTGACTCAATCATTCACACATTCTCCAGCCATTTACTCTTT	5682	chr2:105731762-105737443+	lincRNA	+	105737443	105731762	noncoding	intergenic
ASHG19A3L0002034	25.4877	23.307	29.2937	34.5038	56.5551	35.2697	48.575	4.84224	4.79747	5.09478	4.93405	5.75249	5.01919	5.39091	A	P	P	P	P	P	P	chr8	lincRNA-TSNARE1-4	TTGTAACCACAAAGCTCAGGAGCCACATGCATGCCCAGCACCAGGAGGAAGCCAGTCAAG	536	DB302442	lincRNA	+	143086049	143085513	noncoding	intergenic
ASHG19A3A000365	44.0015	45.0889	30.0878	23.5508	46.6058	35.4678	40.8948	5.60381	5.67169	5.13135	4.35274	5.46257	5.02832	5.13443	P	P	P	P	P	P	P	chr14	AL163953.3	AGCATGTTGTCACCTCTCAATACATAAAACTACTGGAGGGTGGTTCCAAGATGGCCAAAT	562	ENST00000456100	Ensembl	+	54153976	53684429	noncoding	intergenic
ASHG19A3A027720	168.65	153.917	128.275	135.909	147.69	142.051	129.404	7.46891	7.3377	7.12834	6.98618	7.19112	7.09562	6.85987	P	P	P	P	P	P	P	chr5	RP11-844P9.2	CCTGCCTGTTATGAGGGACAGGTAGGAGAGGATGGGCTTTCCATCAAAACAAACAAAAAA	3632	ENST00000515403	Ensembl	-	175612158	175570087	noncoding	intergenic
ASHG19A3A027851	13.3066	12.7343	17.9038	31.6217	28.9323	22.458	32.2344	3.91227	4.05503	4.40982	4.80642	4.7496	4.34061	4.7712	A	A	P	P	P	P	P	chr5	RP11-661C8.2	AAATAACAAGAGCTGGCGGATGCAGCCTCACCTCGCTAGAGCCAGGCATTGTTCTGCACC	559	ENST00000507989	Ensembl	+	956635	946429	noncoding	intergenic
ASHG19A3A049461	13.1341	19.9447	12.1725	19.3988	19.9523	21.0263	24.4465	3.89443	4.60244	3.87948	4.05494	4.19199	4.23761	4.34682	A	A	A	P	P	P	P	chr13	RP11-196I2.1	CATAATCTGCCTAAGATCATTGCATTTACAAGTGACGAACCCACTGCACAAATTTTGGCA	521	ENST00000434565	Ensembl	-	38717369	38624953	noncoding	intergenic
ASHG19A3A043608	138.294	118.685	114.24	124.809	166.797	143.421	237.553	7.19589	6.98332	6.96805	6.8646	7.37461	7.11112	7.78994	P	P	P	P	M	P	P	chr10		GATCCAGCTCTGCTTCATTAATCTTTCCCTTCTAGAAATGCTTCCTCATGCACTACTTTT	2985	AK126099	misc_RNA	+	11440791	11437806	noncoding	intergenic
ASHG19A3A000510	132.979	122.373	123.017	113.379	141.963	118.973	172.692	7.14192	7.02778	7.07077	6.71519	7.13048	6.83274	7.29959	P	P	P	P	P	P	P	chr19	AC092279.2	ctccacgtcctcaccagagcagctagatacagtgtggattggtgcactcacaaaccttga	842	ENST00000514568	Ensembl	-	24225364	24224401	noncoding	intergenic
ASHG19A3A038303	47.5206	30.4229	43.6318	44.2996	72.645	44.6204	105.515	5.71202	5.14488	5.64278	5.31236	6.12357	5.37613	6.55404	P	P	P	P	P	P	P	chr9	RP11-91N2.3	CTCTGAAAGAATCCAGTTATGGGAACACAAATTACCTCATCCTCAGTTTCACTTTAAAAT	206	ENST00000445631	Ensembl	+	2541635	2541096	noncoding	intergenic
ASHG19A3A036131	37.4376	44.8996	42.2359	39.952	43.9486	36.8538	44.6624	5.37689	5.66613	5.59708	5.15303	5.37063	5.08899	5.26841	P	P	P	P	P	P	P	chr8	BC042052	AAGAGATGGTGAAAATTAACCTATCACCACTGCTAATGAACATCACCCTATGGAGAACCG	3296	uc003ysg.2	UCSC_knowngene	-	128746210	128698589	noncoding	intergenic
ASHG19A3L0001531	1275.03	1523.06	1277.14	181.956	234.7	258.938	287.957	10.188	10.4382	10.2449	7.43677	7.89029	8.00739	8.08364	P	P	P	P	P	P	P	chr4	lincRNA-SCARB2	GCCTATGTTTTTGAACAAGACCAATCTGTTGGAGACCCTAAAATTGACTTAAATAGAACA	527	DN920247	lincRNA	-	77155656	77102106	noncoding	exon sense-overlapping	NM_001204255	SCARB2	lysosome membrane protein 2 isoform 2	-	77079891	77135052
ASHG19A3L0001531	1275.03	1523.06	1277.14	181.956	234.7	258.938	287.957	10.188	10.4382	10.2449	7.43677	7.89029	8.00739	8.08364	P	P	P	P	P	P	P	chr4	lincRNA-SCARB2	GCCTATGTTTTTGAACAAGACCAATCTGTTGGAGACCCTAAAATTGACTTAAATAGAACA	527	DN920247	lincRNA	-	77155656	77102106	noncoding	exon sense-overlapping	NM_005506	SCARB2	lysosome membrane protein 2 isoform 1	-	77079891	77135052
ASHG19A3A039633	27523.2	24938.7	23023.8	22168.8	20612.1	19777.9	19491.8	14.5019	14.3876	14.3245	14.6229	14.5157	14.4549	14.342	P	P	P	P	P	P	P	chrX	RP11-431J24.4	ATCTGCTATGTGTTGCAGAAAGGCCATGTACAAGCGGAAGTACTCAGCTGCTAAATCCAA	855	ENST00000399997	Ensembl	-	16217414	16216550	noncoding	intergenic
ASHG19A3L0001694	37.9567	23.6876	33.2085	119.784	49.4023	24.1617	40.4098	5.39489	4.81917	5.26363	6.79748	5.54616	4.45434	5.11583	A	P	P	P	P	P	P	chr5	lincRNA-VCAN	TGATTTGACTAAATCAATTGTGATCATTCCATTTTCCCTGTCACTATTGTCTGAGGAAGT	19851	chr5:82684694-82704544+	lincRNA	+	82704544	82684694	noncoding	intergenic
ASHG19A3L0002146	87.2297	64.0021	80.9334	94.3641	61.0649	50.8797	43.2195	6.5674	6.1396	6.49864	6.45104	5.86945	5.56802	5.21823	P	P	P	P	P	P	P	chr8	lincRNA-SLC7A13	GGCCAGCTGCCTTTGCTATTTAATACACTTAATAGTCACTCTTCTCCATTTACAGCTGTG	578	DB239440	lincRNA	-	87333375	87229854	noncoding	exon sense-overlapping	NM_138817	SLC7A13	solute carrier family 7 member 13	-	87226287	87242604
ASHG19A3L0000558	926.606	998.668	863.312	650.822	845.083	579.502	1059.83	9.75372	9.85516	9.71685	9.38379	9.82727	9.23329	10.0674	P	P	P	P	P	P	P	chr12	lincRNA-KLRB1	TATAAACACTTCCTCCCAGATTCTGAGCAGGATGACAGATCCCAGGACCAACTCTAAAGT	458	AI014992	lincRNA	+	9488187	9486815	noncoding	intergenic
ASHG19A3L0000092	32.155	33.8418	32.8474	38.8349	51.5748	32.3925	51.38	5.16337	5.28771	5.24833	5.11341	5.61122	4.89283	5.47424	P	P	P	P	P	M	P	chr1	lincRNA-C1orf198	AATGCCCCATGTGCATTTGGATGACAAATGGACAATACTGGTTTCTTTCCAGCCAAGCTG	10801	chr1:231020477-231031277-	lincRNA	-	231031277	231020477	noncoding	intergenic
ASHG19A3A018723	36.5599	30.5528	39.5593	59.3611	66.34	62.2778	74.9635	5.34562	5.15032	5.50546	5.75047	5.99372	5.87047	6.04364	P	P	P	P	P	P	P	chr21	AF131217.1	TTGTGGAGTAAGTGAGTGGGCCTGAGTTGAGAAGATCCTGGCCTTGGATTTTAAAACTGT	900	ENST00000433310	Ensembl	-	30047170	29816869	noncoding	intergenic
ASHG19A3A051854	626.687	606.84	599.337	1098.99	509.449	497.312	434.304	9.23452	9.18383	9.21193	10.1821	9.07623	9.00196	8.69942	P	P	P	P	P	P	P	chr14	MGC23270	AGCATTTTCATGGATTACAAATGTCTTAGCCCCTGCCCTTTCAAGCAGTTCCTTAGCTCC	2518	NR_024396	RefSeq_NR	+	105290055	105287537	noncoding	intergenic
ASHG19A3L0002373	15.0856	7.92804	10.8699	24.456	17.2854	23.1387	19.0826	4.08568	3.52407	3.73231	4.41022	3.96564	4.38622	3.94859	A	A	A	P	P	P	P	chr1	lincRNA-KCND3-1	TCACAACTGATCTTTAACATCAGAACTGCGTGTATTAATGGCCCGGCTCACTTGTGAATG	817	AL133825	lincRNA	-	112678462	112677638	noncoding	intergenic
ASHG19A3L0000880	29.8354	30.3226	38.214	31.2008	43.0012	27.7817	47.998	5.06279	5.13979	5.46104	4.78343	5.3388	4.6624	5.37329	P	P	P	P	P	P	P	chr16	lincRNA-WDR59-2	AAGAAAAGGGAGGACTACAGATGGGTATATACTACTCCAGCAATCCCAGAGTCTCTGCTT	282	AA054416	lincRNA	+	74821380	74821102	noncoding	intergenic
ASHG19A3L0002396	30.1531	21.8251	23.992	20.0292	29.3914	20.2735	30.1695	5.07488	4.71278	4.81155	4.10371	4.77023	4.18279	4.66655	A	P	P	P	P	P	P	chr1	lincRNA-LMO4-1	CATGCATACTTGCATAGTTTAATGGATCTTACATTCTTGAATTAGCCTCCATTCCTTCAA	66	EH335967	lincRNA	-	88065423	88065357	noncoding	intergenic
ASHG19A3L0003286	9.73255	14.9936	12.5185	19.0635	18.9215	14.9265	19.935	3.48639	4.24885	3.91991	4.02982	4.1148	3.69568	4.01914	A	A	A	P	P	P	M	chr3	lincRNA-FAM43A-3	ACAGGAACCATGAGATGGGACAAAAACCCTCTCTGGATTCCAGGAAACTCCTGTACTAAA	594	BG984660	lincRNA	-	194509302	194508737	noncoding	intergenic
ASHG19A3A013676	38.4661	32.4989	39.0702	25.5339	52.2591	45.1105	48.4995	5.41342	5.2369	5.4924	4.47926	5.63097	5.39128	5.38807	P	P	P	P	P	M	M	chr2		GTGGTGCTGGCCATTTTTCAAAAGCAAATGTAACTTCTTTCTGGAGGATAATTTTATACT	2514	AK093610	misc_RNA	-	60248365	60245851	noncoding	intergenic
ASHG19A3L0001450	96.9363	141.061	72.4218	73.1657	203.87	189.669	255.434	6.71662	7.22164	6.33973	6.06486	7.67495	7.53632	7.90185	P	P	P	P	P	P	P	chr4	lincRNA-CAMK2D	CTCTTGTCTGTCTCTGAATTCACCCTCATATTAATCAGAATCACTTTATTCCTAGAGTAT	10776	chr4:114709776-114720551-	lincRNA	-	114720551	114709776	noncoding	intergenic
ASHG19A3A023441	41.3379	264.074	30.1858	64.8223	55.3491	231.802	56.7409	5.5121	8.06304	5.13685	5.88201	5.72056	7.84045	5.6275	P	P	P	P	P	P	P	chr3	RP11-550I24.2	TCAAGTTAAACCTTTAAGCTGTTCATTTCCTAAAAGGGTGAAAACGCGGGCACCCCTCGA	483	ENST00000487238	Ensembl	+	157099054	156893057	noncoding	natural antisense	NM_024621	VEPH1	ventricular zone-expressed PH domain-containing	-	156977531	157217445
ASHG19A3A023441	41.3379	264.074	30.1858	64.8223	55.3491	231.802	56.7409	5.5121	8.06304	5.13685	5.88201	5.72056	7.84045	5.6275	P	P	P	P	P	P	P	chr3	RP11-550I24.2	TCAAGTTAAACCTTTAAGCTGTTCATTTCCTAAAAGGGTGAAAACGCGGGCACCCCTCGA	483	ENST00000487238	Ensembl	+	157099054	156893057	noncoding	natural antisense	NM_001167911	VEPH1	ventricular zone-expressed PH domain-containing	-	156977531	157221136
ASHG19A3A023441	41.3379	264.074	30.1858	64.8223	55.3491	231.802	56.7409	5.5121	8.06304	5.13685	5.88201	5.72056	7.84045	5.6275	P	P	P	P	P	P	P	chr3	RP11-550I24.2	TCAAGTTAAACCTTTAAGCTGTTCATTTCCTAAAAGGGTGAAAACGCGGGCACCCCTCGA	483	ENST00000487238	Ensembl	+	157099054	156893057	noncoding	natural antisense	NM_001167912	VEPH1	ventricular zone-expressed PH domain-containing	-	156977531	157221136
ASHG19A3A030636	54.472	27.7358	67.7614	77.3215	36.5053	19.505	21.1377	5.9065	5.02709	6.24654	6.152	5.09211	4.12234	4.11316	A	P	P	P	P	P	P	chr6	RP1-45I4.3	GGTCCAAGTCAATCATCTTTGCTTCTCTCACATTGTCATCGACATTTACCCCAGCATTAT	552	ENST00000454588	Ensembl	-	143363461	143360561	noncoding	intergenic
ASHG19A3L0003378	96.8942	72.3265	81.8711	120.152	45.8824	42.3098	30.4438	6.71577	6.30641	6.51409	6.80397	5.43877	5.29433	4.67992	P	P	P	P	P	P	P	chr5	lincRNA-C5orf53-1	AATGTCTGTGTCCCCTATAAACCATGACTCTACACGGTGGCATTCTAAGGATGGCAGAAT	588	BF116112	lincRNA	-	139528378	139527790	noncoding	intergenic
ASHG19A3L0001775	43.9872	30.1331	37.1474	54.8696	29.1714	25.2616	67.3457	5.60352	5.13173	5.4203	5.63176	4.76063	4.51736	5.88146	P	P	P	P	P	P	P	chr6	lincRNA-NRSN1-2	TCCTATGCTAAATGTCTTCCTTCACATGTGCTAACATTCTGTATTCATTGCAGGATATCA	14076	chr6:23664596-23678671+	lincRNA	+	23678671	23664596	noncoding	intergenic
ASHG19A3L0001950	14.0027	5.76761	16.242	18.3018	21.762	17.1786	26.7973	3.98609	2.96274	4.28277	3.96668	4.31799	3.92237	4.48208	A	A	A	P	P	P	P	chr8	lincRNA-ZFPM2-1	GGGCTTTTTATAGCCTCAGTTGCCTTATGTGACCTATAAGTTGGATACTACTTATTTTAT	598	BX507538	lincRNA	+	105608916	105608325	noncoding	intergenic
ASHG19A3L0001145	81.5859	62.3112	85.2071	72.0713	145.419	83.5426	167.018	6.47782	6.10384	6.57145	6.04223	7.16869	6.29947	7.24683	P	P	P	P	P	P	P	chr2	lincRNA-PTH2R-1	GCAATTCTCTTGTCCTTCTCATGGTGTCAAGCTGGCTGTAGCAGGTATCTTATCCATACA	500	AI760638	lincRNA	-	209689050	209407667	noncoding	intergenic
ASHG19A3L0002647	20.199	17.9602	15.2776	27.4644	26.4217	18.7512	24.863	4.50334	4.47425	4.19876	4.59268	4.60599	4.06247	4.37257	A	P	A	P	P	P	P	chr8	lincRNA-AGPAT5-2	GTTCAGCTCTAAATTCTATAGATCTAGAAAGTGCTTTTCATTTCTGTGAGGTGCCCCTCT	862	BF531040	lincRNA	-	6657975	6657195	noncoding	intergenic
ASHG19A3L0001046	102.083	98.074	104.314	93.3843	151.029	95.8117	182.354	6.78774	6.72858	6.8439	6.43569	7.22262	6.50735	7.38432	P	M	P	P	P	P	P	chr2	lincRNA-INHBB-4	GTCCGTTTCCCTGCTCTTCACCAAGGGCTGGCCTAGGTCAGGCACCGAGCTGGGAGCTGG	102	exon2235-	lincRNA	-	121155232	121155131	noncoding
ASHG19A3A027345	2391.83	1985.8	2012.71	3247.16	3469.69	4064.16	3996.89	11.0773	10.8179	10.89	11.7723	11.8989	12.1058	12.007	P	P	P	P	P	M	P	chr5	FLJ33630	GAGCCAATACACTGAGGTCACTGGATAAATAAACAGATTCTTGCAAGTGCTTTGGAAATG	2977	NR_015360	RefSeq_NR	-	127418766	127357245	noncoding	bidirectional	NM_001046	SLC12A2	solute carrier family 12 member 2	+	127419482	127525380
ASHG19A3L0000384	60.986	59.8109	37.6301	523.088	140.008	460.163	184.436	6.05695	6.04586	5.43927	9.06046	7.11217	8.87929	7.39936	P	P	P	P	P	P	P	chr11	lincRNA-ALX4	GTATAAGCACCCAGCACCTTACATACATATTGCTAGATCCTTTCTTTTCTCTCTCTATCT	16401	chr11:44557524-44573924-	lincRNA	-	44573924	44557524	noncoding	intergenic
ASHG19A3A032328	113.086	97.2887	72.823	266.642	97.3127	250.743	102.535	6.92283	6.71662	6.34842	8.01415	6.55867	7.96361	6.50679	P	P	P	P	P	P	P	chr6	RP11-514O12.2	TTGCGGTTTCTTCCTTGCTCCTTGCAGGTTATATTTGAAATGAATGTCAGAGCCATGCGG	627	ENST00000455390	Ensembl	+	167318323	167317185	noncoding	intergenic
ASHG19A3A036632	25.2882	23.7251	20.9866	43.0402	16.2463	11.0356	17.0344	4.83102	4.8208	4.63284	5.26263	3.86895	3.21038	3.77389	A	P	P	P	P	A	P	chr8	BC048118	ATGGAATGACTGTGGTTTCCCCTGAAAGAAGCATCACTGATCTCTGCACAGGAGAAACAA	1829	uc003xth.2	UCSC_knowngene	+	58277413	58256345	noncoding	intergenic
ASHG19A3L0000419	114.12	98.5443	97.7149	105.623	94.9395	108.272	107.445	6.93533	6.73383	6.75552	6.61378	6.52696	6.68857	6.58396	P	P	P	P	P	P	P	chr11	lincRNA-GRM5	CTGAAATGAACAGTTAATTTCCTGGTCAAATACATTGGAGGAAATGCTGTATAGTGTGAT	568	DA288150	lincRNA	+	88111208	88110642	noncoding	intergenic
ASHG19A3L0001781	41.6937	29.4341	29.445	39.1968	28.0464	13.8329	11.6058	5.52485	5.10198	5.10099	5.12689	4.69854	3.56761	3.14795	P	P	P	A	P	M	M	chr6	lincRNA-ZNF184-1	ATGAACTTCAGACATTCGGATTATAAACCTATGCCGACCCTGATATAATTGGCGCGCACC	910	BE877397	lincRNA	+	27376276	27375649	noncoding	intergenic
ASHG19A3L0002833	5063.3	5000.23	4635.31	3956.19	1432.42	1593.65	1394.94	12.1314	12.135	12.0744	12.0611	10.624	10.7423	10.4811	P	P	P	P	P	P	P	chrX	lincRNA-CXorf56-3	ATGGGACAAATCTTGGCTCAACAATATCATACTTTGCATTTCTCCCCCGAGTCACACACG	9917	chrX:118607438-118617354+	lincRNA	+	118617354	118607438	noncoding	intergenic
ASHG19A3A039998	411.931	385.582	353.269	235.382	211.253	215.525	193.711	8.67461	8.57988	8.50736	7.82443	7.73104	7.72695	7.47798	P	P	P	P	P	P	P	chrX	RP11-314A15.2	CTTCGCTCCTTAGCAGATGACAATAACCTGAATTTTCTATTTGCTCCTCTTAGCAAAAAA	995	ENST00000426799	Ensembl	-	65042091	65041096	noncoding	intergenic
ASHG19A3A023200	42.9047	22.5834	35.4476	239.013	242.278	226.769	255.007	5.56715	4.75476	5.35254	7.84821	7.94257	7.80445	7.8997	A	P	P	P	P	P	P	chr1	RP4-794H19.2	CCAATTCTGATCACTGCTCTTATGGTTTGTAATACATTATTTTGGGTTTGGATGATCCTG	2273	ENST00000419531	Ensembl	+	59366668	59250831	noncoding	intergenic
ASHG19A3L0003159	22.9463	12.3357	15.7353	23.3296	20.4785	8.53643	17.3453	4.68976	4.01585	4.23806	4.33961	4.23194	2.84851	3.80091	A	P	A	P	P	A	P	chr13	lincRNA-MED4-1	AGCCCATTGAGTAAAAAAGTCCAGCTCACTGACACGACTCTATTCTCAAGTAAAATATTA	7134	chr13:48735312-48742445-	lincRNA	-	48742445	48735312	noncoding	intergenic
ASHG19A3L0000665	30.5716	23.1966	31.2259	41.4848	34.0956	32.1713	43.0794	5.0935	4.79197	5.18055	5.2085	4.99053	4.88175	5.2123	A	P	P	P	P	P	P	chr13	lincRNA-KLHL1-1	AACCATAATGGACTATTATCAGGCATTGATATTTGATTCAGCTTGTCCTGCTGGCTTAGG	24326	chr13:69265749-69290074+	lincRNA	+	69290074	69265749	noncoding	intergenic
ASHG19A3A000070	43.5001	12.1442	20.7199	15.9483	12.5528	12.7512	67.2394	5.58791	3.99887	4.61667	3.74889	3.4506	3.4353	5.87976	A	P	P	P	A	A	P	chrX	CA5BP	GATGTGTAGCCAGAGCGCAGAGCAGTGCATCCACTCTGGGAGAGCGTGGACCTGGTTCCT	889	ENST00000380334	Ensembl	+	15721472	15693668	noncoding	intergenic
ASHG19A3A040875	26.5082	23.0105	38.8694	9.79014	10.9341	13.8925	23.2811	4.89967	4.78074	5.48467	2.9979	3.22859	3.57558	4.26926	A	P	P	P	A	P	A	chrX	RP1-154K9.2	CCTTGGAGCAGAAAGTGAAAGTGTTCTGGAGCCAAAAGTAGTAACAAAGATGGAGGGCAA	895	ENST00000411879	Ensembl	+	42558542	42111711	noncoding	intergenic
ASHG19A3A030634	434.16	575.157	470.212	354.673	442.24	519.464	536.463	8.75056	9.10726	8.8832	8.4565	8.84945	9.06378	9.03058	P	P	P	P	P	P	P	chr6	RP11-439L18.3	GCAGCAACATCAGAAAGCCCCTCTGCTGTGCTTCAGGATCACTCTTATCACTGCATAAAG	783	ENST00000446115	Ensembl	-	143343090	143288169	noncoding	intergenic
ASHG19A3L0001732	36.0834	47.9925	35.6231	32.8444	15.1239	240.708	18.5697	5.32828	5.75493	5.35981	4.85833	3.75599	7.8956	3.90909	P	P	P	P	A	M	P	chr6	lincRNA-IL20RA	AAATTAGCAGAAGATTATGCACGGCCAGCTGTACCATGGAACTGCCCAGGTTTTATACCA	20476	chr6:137421307-137441782-	lincRNA	-	137441782	137421307	noncoding	intergenic
ASHG19A3L0001674	115.926	125.146	59.9504	151.435	67.3813	128.934	77.6725	6.9586	7.05663	6.07834	7.15103	6.01848	6.95066	6.09591	P	P	P	P	P	P	P	chr5	lincRNA-PIK3R1-3	AACCTTCCTCCTGGTTGAAGTTAAATGGTGCTTTAGACTCAAGAAGATCTGGGTTTGAAC	43751	chr5:67675269-67719019-	lincRNA	-	67719019	67675269	noncoding	intergenic
ASHG19A3A015507	52.6407	42.1989	27.8178	33.3301	48.0373	45.6837	47.6932	5.85476	5.58375	5.02283	4.87932	5.50641	5.40931	5.36508	P	P	P	P	P	P	P	chr2	AC009499.1	ATATTGACGCTGAGACCCATGGGATGTAGGAGTGCTGAGCACATTTGCAAGACATAAAGA	779	ENST00000366209	Ensembl	+	34522820	33931952	noncoding	intergenic
ASHG19A3A046506	63.9921	51.1236	62.8741	62.7705	32.421	30.1521	34.0915	6.12735	5.84054	6.1455	5.83422	4.91607	4.7873	4.85385	P	P	P	P	P	P	P	chr11		TACCAAGCTACCCTTACCAAGCTACGGGTGCAGGAAGCCTTTAGATGCCTCGCTCTCCCT	158	AF083120	misc_RNA	+	62321291	62321164	noncoding	intergenic
ASHG19A3L0002482	38.3468	26.6382	25.8477	22.8104	15.8149	9.87681	11.6556	5.40931	4.97336	4.92062	4.30366	3.82485	3.05468	3.1551	A	P	P	A	P	A	M	chr1	lincRNA-CA6	AATGGGTGGTGCCGCAGGAGAACTCATCTCAGTGGATTCTGCATTTGAATATGGAATACA	619	AI432427	lincRNA	+	9229411	8906748	noncoding	intron sense-overlapping	NM_001215	CA6	carbonic anhydrase 6 precursor	+	9005921	9035148
ASHG19A3L0002482	38.3468	26.6382	25.8477	22.8104	15.8149	9.87681	11.6556	5.40931	4.97336	4.92062	4.30366	3.82485	3.05468	3.1551	A	P	P	A	P	A	M	chr1	lincRNA-CA6	AATGGGTGGTGCCGCAGGAGAACTCATCTCAGTGGATTCTGCATTTGAATATGGAATACA	619	AI432427	lincRNA	+	9229411	8906748	noncoding	intronic antisense	NM_024980	GPR157	probable G-protein coupled receptor 157	-	9164475	9189229
ASHG19A3L0002482	38.3468	26.6382	25.8477	22.8104	15.8149	9.87681	11.6556	5.40931	4.97336	4.92062	4.30366	3.82485	3.05468	3.1551	A	P	P	A	P	A	M	chr1	lincRNA-CA6	AATGGGTGGTGCCGCAGGAGAACTCATCTCAGTGGATTCTGCATTTGAATATGGAATACA	619	AI432427	lincRNA	+	9229411	8906748	noncoding	intronic antisense	NM_207420	SLC2A7	"solute carrier family 2, facilitated glucose"	-	9063358	9086404
ASHG19A3L0002482	38.3468	26.6382	25.8477	22.8104	15.8149	9.87681	11.6556	5.40931	4.97336	4.92062	4.30366	3.82485	3.05468	3.1551	A	P	P	A	P	A	M	chr1	lincRNA-CA6	AATGGGTGGTGCCGCAGGAGAACTCATCTCAGTGGATTCTGCATTTGAATATGGAATACA	619	AI432427	lincRNA	+	9229411	8906748	noncoding	intronic antisense	NM_001201483	ENO1	c-myc promoter-binding protein-1 isoform MBP-1	-	8921058	8931635
ASHG19A3L0002482	38.3468	26.6382	25.8477	22.8104	15.8149	9.87681	11.6556	5.40931	4.97336	4.92062	4.30366	3.82485	3.05468	3.1551	A	P	P	A	P	A	M	chr1	lincRNA-CA6	AATGGGTGGTGCCGCAGGAGAACTCATCTCAGTGGATTCTGCATTTGAATATGGAATACA	619	AI432427	lincRNA	+	9229411	8906748	noncoding	intronic antisense	NM_001428	ENO1	alpha-enolase isoform 1	-	8921058	8939151
ASHG19A3L0002482	38.3468	26.6382	25.8477	22.8104	15.8149	9.87681	11.6556	5.40931	4.97336	4.92062	4.30366	3.82485	3.05468	3.1551	A	P	P	A	P	A	M	chr1	lincRNA-CA6	AATGGGTGGTGCCGCAGGAGAACTCATCTCAGTGGATTCTGCATTTGAATATGGAATACA	619	AI432427	lincRNA	+	9229411	8906748	noncoding	intronic antisense	NM_001135585	SLC2A5	"solute carrier family 2, facilitated glucose"	-	9101426	9129887
ASHG19A3L0002482	38.3468	26.6382	25.8477	22.8104	15.8149	9.87681	11.6556	5.40931	4.97336	4.92062	4.30366	3.82485	3.05468	3.1551	A	P	P	A	P	A	M	chr1	lincRNA-CA6	AATGGGTGGTGCCGCAGGAGAACTCATCTCAGTGGATTCTGCATTTGAATATGGAATACA	619	AI432427	lincRNA	+	9229411	8906748	noncoding	intronic antisense	NM_003039	SLC2A5	"solute carrier family 2, facilitated glucose"	-	9097004	9129887
ASHG19A3A025216	148.314	129.021	136.53	361.292	367.575	371.438	412.084	7.28845	7.10073	7.21371	8.48182	8.55777	8.54548	8.61717	P	P	P	P	P	P	P	chr4	BC025734	CTGCATCTTTTTTGTTCTTTCTGCTGTGAAAATAATTTTGTCGGAAAATGTAACCAGTGC	2403	uc003gid.2	UCSC_knowngene	+	4712662	4543930	noncoding	bidirectional	NM_016930	STX18	syntaxin-18	-	4420695	4543775
ASHG19A3L0003324	7.13579	8.9746	7.7981	245.718	252.01	259.568	289.585	3.08192	3.65369	3.28585	7.89013	8.00853	8.01182	8.09302	A	A	A	P	P	P	P	chr6	lincRNA-C6orf70-2	GAAGGACCTTGGTGTTGAACGACCTTGGTGAAGGACCATGGTGATGAAGGACCTTGGTGA	387	DN930364	lincRNA	-	170395067	170394056	noncoding	intergenic
ASHG19A3L0000058	18005.9	22476.9	18559.6	50548.9	50035.9	56343.4	60233.5	13.9066	14.2467	14.0136	15.8498	15.7905	15.9396	15.9999	P	P	P	P	P	P	P	chr1	lincRNA-ATP6V1G3-2	GCTGTCTTTACATGGGGTTTTCAATTTTGCATGCTCGATTATTCCCTGTACAATATTTAA	4597	Y00062	lincRNA	+	198726330	198284952	noncoding	intronic antisense	NM_133262	ATP6V1G3	V-type proton ATPase subunit G 3 isoform a	-	198492351	198510075
ASHG19A3L0000058	18005.9	22476.9	18559.6	50548.9	50035.9	56343.4	60233.5	13.9066	14.2467	14.0136	15.8498	15.7905	15.9396	15.9999	P	P	P	P	P	P	P	chr1	lincRNA-ATP6V1G3-2	GCTGTCTTTACATGGGGTTTTCAATTTTGCATGCTCGATTATTCCCTGTACAATATTTAA	4597	Y00062	lincRNA	+	198726330	198284952	noncoding	exon sense-overlapping	NM_080921	PTPRC	receptor-type tyrosine-protein phosphatase C	+	198608136	198726545
ASHG19A3L0000058	18005.9	22476.9	18559.6	50548.9	50035.9	56343.4	60233.5	13.9066	14.2467	14.0136	15.8498	15.7905	15.9396	15.9999	P	P	P	P	P	P	P	chr1	lincRNA-ATP6V1G3-2	GCTGTCTTTACATGGGGTTTTCAATTTTGCATGCTCGATTATTCCCTGTACAATATTTAA	4597	Y00062	lincRNA	+	198726330	198284952	noncoding	intron sense-overlapping	NM_133494	NEK7	serine/threonine-protein kinase Nek7	+	198126107	198291548
ASHG19A3L0000058	18005.9	22476.9	18559.6	50548.9	50035.9	56343.4	60233.5	13.9066	14.2467	14.0136	15.8498	15.7905	15.9396	15.9999	P	P	P	P	P	P	P	chr1	lincRNA-ATP6V1G3-2	GCTGTCTTTACATGGGGTTTTCAATTTTGCATGCTCGATTATTCCCTGTACAATATTTAA	4597	Y00062	lincRNA	+	198726330	198284952	noncoding	exon sense-overlapping	NM_080923	PTPRC	receptor-type tyrosine-protein phosphatase C	+	198608136	198662334
ASHG19A3L0000058	18005.9	22476.9	18559.6	50548.9	50035.9	56343.4	60233.5	13.9066	14.2467	14.0136	15.8498	15.7905	15.9396	15.9999	P	P	P	P	P	P	P	chr1	lincRNA-ATP6V1G3-2	GCTGTCTTTACATGGGGTTTTCAATTTTGCATGCTCGATTATTCCCTGTACAATATTTAA	4597	Y00062	lincRNA	+	198726330	198284952	noncoding	exon sense-overlapping	NM_002838	PTPRC	receptor-type tyrosine-protein phosphatase C	+	198608136	198726545
ASHG19A3L0000058	18005.9	22476.9	18559.6	50548.9	50035.9	56343.4	60233.5	13.9066	14.2467	14.0136	15.8498	15.7905	15.9396	15.9999	P	P	P	P	P	P	P	chr1	lincRNA-ATP6V1G3-2	GCTGTCTTTACATGGGGTTTTCAATTTTGCATGCTCGATTATTCCCTGTACAATATTTAA	4597	Y00062	lincRNA	+	198726330	198284952	noncoding	intronic antisense	NM_133326	ATP6V1G3	V-type proton ATPase subunit G 3 isoform b	-	198492351	198510075
ASHG19A3A039081	90.3939	77.3883	72.1499	111.916	72.1814	46.1961	61.9393	6.61332	6.39843	6.33413	6.69678	6.11371	5.4278	5.75623	P	P	P	P	P	P	P	chr9	RP11-308N19.1	TGTGTCTTAAGCTGGGTCATTGAAGTGGAATGTTTTCACAAGACCTCCTCCACTTGCTAC	1686	ENST00000435485	Ensembl	+	109367076	109040672	noncoding	intergenic
ASHG19A3A009370	555.491	549.643	532.553	583.124	334.272	268.322	223.226	9.06378	9.046	9.04901	9.21749	8.4248	8.06429	7.68851	P	P	P	P	P	P	M	chr1		ATGATTACTGGACTTCTGTGCTGCCCAGTTCCACCACACCCCTACTGTGCCTTTCCTTTT	550	AF086167	misc_RNA	-	200296221	200295521	noncoding	intergenic
ASHG19A3L0000958	27.4958	17.4986	13.6385	31.4575	22.061	19.8168	28.7504	4.94565	4.44117	4.03572	4.79864	4.337	4.14609	4.59512	A	P	A	P	M	M	M	chr18	lincRNA-PIK3C3-1	TATTACTTTCTCCTAAAGAGCCAACACTACCTTTTTGCATATATGGCATTCACTTCTCAT	12001	chr18:38893677-38905677+	lincRNA	+	38905677	38893677	noncoding	intergenic
ASHG19A3A030189	34.7615	26.2894	26.5298	33.638	38.421	41.2507	45.4092	5.27766	4.9535	4.95794	4.89404	5.17138	5.25348	5.28901	A	P	P	P	P	P	P	chr1	RP11-301M17.1	TGTGACCAGCGCGACTCACCGCTCTAATCGCTCCGATTTTCCAAGGCCTTGCTCAGTAGT	517	ENST00000415381	Ensembl	+	147718956	147718439	noncoding	intergenic
ASHG19A3A049789	132.11	117.205	130.197	92.2819	152.193	114.646	162.387	7.13275	6.96677	7.14861	6.41944	7.23477	6.77251	7.20747	P	P	P	P	P	P	P	chr13		ATGACAATGTGTCTGGCAAGTTCTTCCCCTGTGTGACTTGCTCATATTTCAAATAGTGGA	3355	AK125572	RNAdb	-	100609401	100504863	noncoding	intronic antisense	NM_206808	CLYBL	"citrate lyase subunit beta-like protein,"	+	100258918	100549388
ASHG19A3L0002211	77.4099	84.1216	66.2381	93.8998	94.483	99.0963	105.275	6.40665	6.51089	6.21348	6.44417	6.51993	6.55744	6.5492	P	P	P	P	P	P	P	chr9	lincRNA-BNC2-2	GGAAAGAATGCATTCACAGAAAGCCAAGGAATGATAACACTAATGCTAATACAATACTAC	2382	AL832443	lincRNA	+	16061659	15874538	noncoding	exon sense-overlapping	NM_173550	C9orf93	hypothetical protein LOC203238	+	15553096	15971897
ASHG19A3L0000845	25.7524	24.4214	24.3529	17.2187	28.7786	27.6806	26.0116	4.85833	4.85744	4.8327	3.86836	4.74156	4.65623	4.43775	A	P	P	P	P	P	P	chr15	lincRNA-MESDC2	ATAAATTTCCATGTACCAGCAAGCAGCATGGTCATATTGCAGTCTCCTGCTAGACCGCTT	177	BF850330	lincRNA	+	81260482	81260381	noncoding	intergenic
ASHG19A3A052798	1490.61	1424	1346.53	1334.7	597.526	671.486	562.162	10.4028	10.3425	10.3208	10.4811	9.30762	9.45181	9.11033	P	P	P	P	P	P	P	chr15	LOC729082	CTGCATTTCCCCTCCATTCTTGAAGCCAATCTTTTTCAAGAAATGACTAAGCAGCACCTG	1379	uc001znn.1	UCSC_knowngene	+	41601901	41576200	noncoding	natural antisense	NM_007280	OIP5	protein Mis18-beta	-	41601465	41624819
ASHG19A3L0001867	21.6674	12.35	14.7277	18.9871	26.8027	16.8678	28.8384	4.5996	4.01697	4.14193	4.02352	4.62688	3.89379	4.59929	A	P	A	P	P	P	P	chr7	lincRNA-SLC35B4	CTGACTTGCTCTTCTAGAACTCAACACTTTGGTTTCATCTGAATCCTAATTATCCAATAT	585	AW984735	lincRNA	-	134107675	134107099	noncoding	intergenic
ASHG19A3L0001037	77.4305	91.0184	72.616	69.42	62.8278	72.5261	80.5629	6.40716	6.62349	6.34497	5.98745	5.91497	6.102	6.1543	P	P	P	P	P	P	P	chr2	lincRNA-CHCHD5-1	TGGTTATACAGTCAAATAATACTCTAGGCAATATCCCCCATGGGATGGTGTTCTCCCCAG	15151	chr2:113359154-113374304-	lincRNA	-	113374304	113359154	noncoding	intergenic
ASHG19A3L0002962	246.558	248.267	231.441	326.543	188.632	168.551	190.762	7.97738	7.98163	7.91835	8.32489	7.55749	7.35594	7.45157	P	P	P	P	P	P	P	chr17	lincRNA-UBE2G1	TTAAAGTGCTTAGAATGGGGGTTCTTGCTGCCCCTGAGAGATATCTTCATTTGGGATTGG	456	AA769057	lincRNA	-	4298629	4298328	noncoding	intergenic
ASHG19A3A015206	169378	171385	144816	120244	142178	122343	129811	17.1132	17.1803	17.0064	17.094	17.2616	17.0259	17.1051	P	M	P	P	P	P	P	chr1	RP11-185B14.1	GCATATGTTCGACTGGCTCCTGATTATGATGCTTTGAATGTTGCCGACAAAATTGGGATC	259	ENST00000436229	Ensembl	+	8891431	8891172	noncoding	intergenic
ASHG19A3L0003228	90.1999	88.0494	76.9094	349.094	318.308	359.697	370.942	6.61135	6.57532	6.42173	8.43068	8.35001	8.49583	8.45896	P	P	P	P	P	P	P	chr22	lincRNA-SUN2	ATGTAGCATATCATGGGGGACTGGGAAGTTGGGAGAGGTAGGACCTGACTGGTCTTGGCT	2725	AK289744	lincRNA	-	39190148	39131913	noncoding	exon sense-overlapping	NM_005740	DNAL4	"dynein light chain 4, axonemal"	-	39174512	39190161
ASHG19A3L0003228	90.1999	88.0494	76.9094	349.094	318.308	359.697	370.942	6.61135	6.57532	6.42173	8.43068	8.35001	8.49583	8.45896	P	P	P	P	P	P	P	chr22	lincRNA-SUN2	ATGTAGCATATCATGGGGGACTGGGAAGTTGGGAGAGGTAGGACCTGACTGGTCTTGGCT	2725	AK289744	lincRNA	-	39190148	39131913	noncoding	exon sense-overlapping	NM_001199579	SUN2	SUN domain-containing protein 2 isoform a	-	39130718	39152024
ASHG19A3L0003228	90.1999	88.0494	76.9094	349.094	318.308	359.697	370.942	6.61135	6.57532	6.42173	8.43068	8.35001	8.49583	8.45896	P	P	P	P	P	P	P	chr22	lincRNA-SUN2	ATGTAGCATATCATGGGGGACTGGGAAGTTGGGAGAGGTAGGACCTGACTGGTCTTGGCT	2725	AK289744	lincRNA	-	39190148	39131913	noncoding	exon sense-overlapping	NM_001199580	SUN2	SUN domain-containing protein 2 isoform b	-	39130718	39151467
ASHG19A3L0003228	90.1999	88.0494	76.9094	349.094	318.308	359.697	370.942	6.61135	6.57532	6.42173	8.43068	8.35001	8.49583	8.45896	P	P	P	P	P	P	P	chr22	lincRNA-SUN2	ATGTAGCATATCATGGGGGACTGGGAAGTTGGGAGAGGTAGGACCTGACTGGTCTTGGCT	2725	AK289744	lincRNA	-	39190148	39131913	noncoding	exon sense-overlapping	NM_015374	SUN2	SUN domain-containing protein 2 isoform b	-	39130718	39152024
ASHG19A3A052698	420.436	510.737	458.447	223.125	400.555	454.007	481.103	8.70574	8.95182	8.85244	7.73947	8.68458	8.85838	8.85794	P	P	P	P	P	P	P	chr15	BC043570	ATTACCTGTGCTGTCCCTGCATTCTCAAGCTCCAAATTGTCAACTAAGAAATGGTCACTT	2525	uc001zcp.1	UCSC_knowngene	+	29971367	29967193	noncoding	intergenic
ASHG19A3L0000524	91.1591	86.687	71.4388	174.285	139.069	175.641	139.584	6.6252	6.55166	6.3195	7.36468	7.10016	7.41775	6.98098	P	P	P	P	P	P	P	chr12	lincRNA-RAB3IP	AGATTTCATTAGGCACACACACACCTACACACATTACAGAAGGAAACTAAAATATTTCAG	605	BG898852	lincRNA	-	70474753	70474248	noncoding	intergenic
ASHG19A3L0000659	46.149	42.4273	39.507	68.899	26.7811	81.0415	35.9178	5.67227	5.5916	5.50382	5.97545	4.62569	6.25676	4.93802	P	P	P	P	P	P	P	chr13	lincRNA-DIAPH3	GCTCTCATCCTCTGCTGAATAAGGAACAATTCCTTTTAAAGTATTAACTGATAACCACAT	15026	chr13:58433499-58448524+	lincRNA	+	58448524	58433499	noncoding	intergenic
ASHG19A3L0001763	26.9371	33.7334	27.7177	66.7247	35.3466	29.4357	32.5447	4.92007	5.28362	5.01688	5.92481	5.04607	4.74995	4.78533	P	P	P	P	P	P	P	chr6	lincRNA-FRMD1-3	TGTTCTTGTGCCACGATAGGGGGCTCTTTGATCCACCCCTGGGCATTGTAAAGGGTGGGA	345	exon3669-	lincRNA	-	168675017	168674673	noncoding
ASHG19A3L0002425	33.6039	21.9368	34.0966	30.0489	31.3138	18.4957	43.8928	5.22965	4.71827	5.29689	4.72617	4.86623	4.03916	5.24061	A	P	P	P	P	P	P	chr9	lincRNA-KLF4-5	GATGGGGGCAGAGATTCCTTTTACAGAACTCCACAGTAACTTCTCCATATGTCTCAATGG	11866	chr9:110999314-111011179-	lincRNA	-	111011179	110999314	noncoding	intergenic
ASHG19A3A043894	915.731	874.03	882.262	134.629	129.456	150.882	136.819	9.73386	9.68548	9.74414	6.97413	6.99304	7.18822	6.95307	P	P	P	P	M	P	P	chr10	RP11-292F22.3	TATGTAACACTGGACACTTTGAGGTGGAGATCAATGTCAAGTGGCTCAGTGAGAACCCTT	1273	ENST00000399501	Ensembl	+	47595651	47594378	noncoding	intergenic
ASHG19A3L0002796	130.643	141.925	122.175	155.041	165.126	201.846	172.767	7.11777	7.22969	7.05992	7.18714	7.35912	7.62669	7.30048	P	P	P	P	P	P	P	chr3	lincRNA-EPHB1-1	CTCGCTTTTCAGGAATTATGGAGCCTGTATGTCTCTTCTTTTCTGTCCGTGTCTTCTTCA	582	BP232819	lincRNA	+	134670682	134400866	noncoding	exon sense-overlapping	NM_004441	EPHB1	ephrin type-B receptor 1 precursor	+	134514098	134979307
ASHG19A3A010086	22.3288	23.9155	17.9466	56.9402	15.0923	26.3325	16.7362	4.64566	4.83166	4.41408	5.68437	3.75086	4.58117	3.74396	A	P	P	P	A	P	P	chr1	LOC127841	TTCCTTGCTCACACTGAGATTCTGTGATTCTCCTCTGAGCATTTCCATGGATAATTTTTT	1290	NR_027022	RefSeq_NR	-	204338847	204337557	noncoding	intergenic
ASHG19A3L0002911	26.3384	17.2135	29.2687	60.8041	21.7489	15.019	13.824	4.89008	4.42151	5.0935	5.7865	4.31681	3.70576	3.42401	A	P	P	A	P	P	P	chr12	lincRNA-LTA4H	GTGAGAACCAAATTCCTTACTAGTCCTACCACCTGAGCTTCAAGGATTGTGGATATCCAG	280	W87727	lincRNA	-	96556861	96556590	noncoding	intergenic
ASHG19A3L0000017	233.727	279.201	240.242	332.88	142.485	121.5	158.423	7.90928	8.14056	7.97043	8.35739	7.13413	6.86599	7.17068	P	P	P	P	P	P	P	chr1	lincRNA-CTTNBP2NL-1	ACCCAGGCCTTCAACTCCTAGCTACGGCCCCTTCCTGGAAAAATATCTGTTAGATTAAAA	700	CR738423	lincRNA	+	112550748	112548412	noncoding	intergenic
ASHG19A3L0003537	53.1321	57.389	47.5633	127.606	118.899	99.5698	102.802	5.86897	5.99259	5.76032	6.89439	6.86125	6.56444	6.51089	P	P	P	P	P	P	P	chr20	lincRNA-ANGPT4	AGAGTGAAAATGCTAAGGAGAAAAATGAAGCAGGGAAGGATGGGGAACTAGAGATTTTTT	1325	CR615581	lincRNA	+	838103	825766	noncoding	exon sense-overlapping	NM_031424	FAM110A	hypothetical protein LOC83541	+	825284	826922
ASHG19A3L0003537	53.1321	57.389	47.5633	127.606	118.899	99.5698	102.802	5.86897	5.99259	5.76032	6.89439	6.86125	6.56444	6.51089	P	P	P	P	P	P	P	chr20	lincRNA-ANGPT4	AGAGTGAAAATGCTAAGGAGAAAAATGAAGCAGGGAAGGATGGGGAACTAGAGATTTTTT	1325	CR615581	lincRNA	+	838103	825766	noncoding	exon sense-overlapping	NM_001042353	FAM110A	hypothetical protein LOC83541	+	814355	826922
ASHG19A3L0003537	53.1321	57.389	47.5633	127.606	118.899	99.5698	102.802	5.86897	5.99259	5.76032	6.89439	6.86125	6.56444	6.51089	P	P	P	P	P	P	P	chr20	lincRNA-ANGPT4	AGAGTGAAAATGCTAAGGAGAAAAATGAAGCAGGGAAGGATGGGGAACTAGAGATTTTTT	1325	CR615581	lincRNA	+	838103	825766	noncoding	exon sense-overlapping	NM_207121	FAM110A	hypothetical protein LOC83541	+	816710	826922
ASHG19A3A022462	90.0564	70.9361	74.4801	21.7056	27.6833	19.7469	25.8452	6.60885	6.28178	6.3797	4.22513	4.6795	4.14203	4.42933	P	P	P	P	P	P	P	chr1	RP11-191G24.1	CAGCAGAAGCAGCGTAAAGTATTGGAACTTTGAATCTGACATCAGAAAGACCTGCACTCA	362	ENST00000426017	Ensembl	+	52027301	51984054	noncoding	intronic antisense	NM_001981	EPS15	epidermal growth factor receptor substrate 15	-	51819934	51984995
ASHG19A3A022766	306.566	287.595	301.722	591.714	320.087	342.071	637.297	8.27291	8.17692	8.29061	9.24151	8.35701	8.4187	9.29454	P	P	P	P	P	P	P	chr3	CTD-2230D16.1	GATTTGTATATTTTCGCTTTCTCCTCAAGTAACACCTGGACCTGCTCCTTTCCCTTCAAA	1970	ENST00000481312	Ensembl	+	64997143	64670803	noncoding	intronic antisense	NM_182920	ADAMTS9	A disintegrin and metalloproteinase with	-	64501330	64673365
ASHG19A3A053272	87.4805	60.5157	89.9167	89.3529	159.138	115.685	198.429	6.57192	6.06279	6.64165	6.37269	7.30478	6.78646	7.51258	P	P	P	P	P	P	P	chr1	RP11-336K24.4	TGTCATCCATCTGCTGGCCCTTTGGACCACTCGGCCACTGGCATGCTTTCCAAGTCTGTA	420	ENST00000423422	Ensembl	-	155976861	155955165	noncoding	intergenic
ASHG19A3A014896	23242.3	22823.5	21202.3	33506.1	34831.4	35250.8	34995.6	14.263	14.2678	14.202	15.2502	15.2673	15.2804	15.1858	P	P	P	P	P	P	P	chr2	AC125238.4	CCAACAGTGGATGGCAAAGTGGTGTCTGAGACCAATGACACCAAAGTTCTGAGACATTAA	1299	ENST00000415349	Ensembl	-	204630316	204629017	noncoding	intergenic
ASHG19A3A030476	74.7223	81.3204	76.1539	60.0029	54.6141	60.4417	65.3802	6.35472	6.46573	6.40883	5.76696	5.6999	5.82439	5.83693	P	P	P	P	P	P	P	chr6	RP11-510H23.1	TGTGTGCATGAAATTCTACAGGCATATGGGGTCGTGATCTGCTAATCTCCAGTTATTATA	4507	ENST00000439075	Ensembl	-	125284185	125230238	noncoding	intergenic
ASHG19A3L0001378	125.066	135.391	104.522	383.733	388.803	385.018	423.569	7.06105	7.16262	6.84741	8.56802	8.64358	8.60006	8.66073	P	P	P	P	P	P	P	chr3	lincRNA-C3orf35	AAGGTGATTGCATGCTGGTGTCTTTAGCTAAAAATAAAGTTAATGTCTTTGGGGCAATCA	981	AJ493605	lincRNA	+	37459039	37427759	noncoding	exon sense-overlapping	NM_178342	C3orf35	AP20 region protein 1 isoform E	+	37440967	37459865
ASHG19A3L0001378	125.066	135.391	104.522	383.733	388.803	385.018	423.569	7.06105	7.16262	6.84741	8.56802	8.64358	8.60006	8.66073	P	P	P	P	P	P	P	chr3	lincRNA-C3orf35	AAGGTGATTGCATGCTGGTGTCTTTAGCTAAAAATAAAGTTAATGTCTTTGGGGCAATCA	981	AJ493605	lincRNA	+	37459039	37427759	noncoding	exon sense-overlapping	NM_178339	C3orf35	AP20 region protein 1 isoform B	+	37440967	37476988
ASHG19A3L0001033	17.2164	16.0945	21.2344	38.8489	10.3942	33.9782	22.9562	4.26577	4.33418	4.64711	5.11416	3.16441	4.9634	4.24487	A	A	P	P	A	P	P	chr2	lincRNA-RGPD4-2	AATACAATGTTGATTCTGTTACTATGCTTGACATTGCCTTTTCACTACCCAGCTTTTCTA	19126	chr2:107718693-107737818+	lincRNA	+	107737818	107718693	noncoding	intergenic
ASHG19A3L0000165	20.9875	18.5065	16.3548	77.0266	43.9343	45.1034	38.9775	4.55629	4.51103	4.2908	6.14613	5.37002	5.39091	5.05871	A	P	A	P	P	P	P	chr1	lincRNA-PDE4B	TCATCTGATGTTGCTGAACCTCCTGGACTTGAAGATTCAACAGATGGCTCCGCCATATTT	400	DN918054	lincRNA	-	67423817	66890612	noncoding	intron sense-overlapping	NM_207014	WDR78	WD repeat-containing protein 78 isoform 2	-	67303281	67390570
ASHG19A3L0000165	20.9875	18.5065	16.3548	77.0266	43.9343	45.1034	38.9775	4.55629	4.51103	4.2908	6.14613	5.37002	5.39091	5.05871	A	P	A	P	P	P	P	chr1	lincRNA-PDE4B	TCATCTGATGTTGCTGAACCTCCTGGACTTGAAGATTCAACAGATGGCTCCGCCATATTT	400	DN918054	lincRNA	-	67423817	66890612	noncoding	natural antisense	NM_001077704	MIER1	mesoderm induction early response protein 1	+	67395925	67454302
ASHG19A3L0000165	20.9875	18.5065	16.3548	77.0266	43.9343	45.1034	38.9775	4.55629	4.51103	4.2908	6.14613	5.37002	5.39091	5.05871	A	P	A	P	P	P	P	chr1	lincRNA-PDE4B	TCATCTGATGTTGCTGAACCTCCTGGACTTGAAGATTCAACAGATGGCTCCGCCATATTT	400	DN918054	lincRNA	-	67423817	66890612	noncoding	intron sense-overlapping	NM_024763	WDR78	WD repeat-containing protein 78 isoform 1	-	67278571	67390570
ASHG19A3L0000165	20.9875	18.5065	16.3548	77.0266	43.9343	45.1034	38.9775	4.55629	4.51103	4.2908	6.14613	5.37002	5.39091	5.05871	A	P	A	P	P	P	P	chr1	lincRNA-PDE4B	TCATCTGATGTTGCTGAACCTCCTGGACTTGAAGATTCAACAGATGGCTCCGCCATATTT	400	DN918054	lincRNA	-	67423817	66890612	noncoding	natural antisense	NM_001146111	MIER1	mesoderm induction early response protein 1	+	67390577	67454302
ASHG19A3L0000165	20.9875	18.5065	16.3548	77.0266	43.9343	45.1034	38.9775	4.55629	4.51103	4.2908	6.14613	5.37002	5.39091	5.05871	A	P	A	P	P	P	P	chr1	lincRNA-PDE4B	TCATCTGATGTTGCTGAACCTCCTGGACTTGAAGATTCAACAGATGGCTCCGCCATATTT	400	DN918054	lincRNA	-	67423817	66890612	noncoding	natural antisense	NM_001146110	MIER1	mesoderm induction early response protein 1	+	67390577	67454302
ASHG19A3L0000165	20.9875	18.5065	16.3548	77.0266	43.9343	45.1034	38.9775	4.55629	4.51103	4.2908	6.14613	5.37002	5.39091	5.05871	A	P	A	P	P	P	P	chr1	lincRNA-PDE4B	TCATCTGATGTTGCTGAACCTCCTGGACTTGAAGATTCAACAGATGGCTCCGCCATATTT	400	DN918054	lincRNA	-	67423817	66890612	noncoding	intronic antisense	NM_152665	TCTEX1D1	tctex1 domain-containing protein 1	+	67218139	67244730
ASHG19A3L0000165	20.9875	18.5065	16.3548	77.0266	43.9343	45.1034	38.9775	4.55629	4.51103	4.2908	6.14613	5.37002	5.39091	5.05871	A	P	A	P	P	P	P	chr1	lincRNA-PDE4B	TCATCTGATGTTGCTGAACCTCCTGGACTTGAAGATTCAACAGATGGCTCCGCCATATTT	400	DN918054	lincRNA	-	67423817	66890612	noncoding	natural antisense	NM_001146113	MIER1	mesoderm induction early response protein 1	+	67390577	67454302
ASHG19A3L0000165	20.9875	18.5065	16.3548	77.0266	43.9343	45.1034	38.9775	4.55629	4.51103	4.2908	6.14613	5.37002	5.39091	5.05871	A	P	A	P	P	P	P	chr1	lincRNA-PDE4B	TCATCTGATGTTGCTGAACCTCCTGGACTTGAAGATTCAACAGATGGCTCCGCCATATTT	400	DN918054	lincRNA	-	67423817	66890612	noncoding	natural antisense	NM_020948	MIER1	mesoderm induction early response protein 1	+	67390577	67454302
ASHG19A3L0000165	20.9875	18.5065	16.3548	77.0266	43.9343	45.1034	38.9775	4.55629	4.51103	4.2908	6.14613	5.37002	5.39091	5.05871	A	P	A	P	P	P	P	chr1	lincRNA-PDE4B	TCATCTGATGTTGCTGAACCTCCTGGACTTGAAGATTCAACAGATGGCTCCGCCATATTT	400	DN918054	lincRNA	-	67423817	66890612	noncoding	natural antisense	NM_001077701	MIER1	mesoderm induction early response protein 1	+	67395925	67454302
ASHG19A3L0000165	20.9875	18.5065	16.3548	77.0266	43.9343	45.1034	38.9775	4.55629	4.51103	4.2908	6.14613	5.37002	5.39091	5.05871	A	P	A	P	P	P	P	chr1	lincRNA-PDE4B	TCATCTGATGTTGCTGAACCTCCTGGACTTGAAGATTCAACAGATGGCTCCGCCATATTT	400	DN918054	lincRNA	-	67423817	66890612	noncoding	natural antisense	NM_001146112	MIER1	mesoderm induction early response protein 1	+	67390577	67454302
ASHG19A3L0000165	20.9875	18.5065	16.3548	77.0266	43.9343	45.1034	38.9775	4.55629	4.51103	4.2908	6.14613	5.37002	5.39091	5.05871	A	P	A	P	P	P	P	chr1	lincRNA-PDE4B	TCATCTGATGTTGCTGAACCTCCTGGACTTGAAGATTCAACAGATGGCTCCGCCATATTT	400	DN918054	lincRNA	-	67423817	66890612	noncoding	natural antisense	NM_001077700	MIER1	mesoderm induction early response protein 1	+	67390577	67454302
ASHG19A3L0000165	20.9875	18.5065	16.3548	77.0266	43.9343	45.1034	38.9775	4.55629	4.51103	4.2908	6.14613	5.37002	5.39091	5.05871	A	P	A	P	P	P	P	chr1	lincRNA-PDE4B	TCATCTGATGTTGCTGAACCTCCTGGACTTGAAGATTCAACAGATGGCTCCGCCATATTT	400	DN918054	lincRNA	-	67423817	66890612	noncoding	intron sense-overlapping	NM_005478	INSL5	insulin-like peptide INSL5 precursor	-	67263423	67266942
ASHG19A3L0000165	20.9875	18.5065	16.3548	77.0266	43.9343	45.1034	38.9775	4.55629	4.51103	4.2908	6.14613	5.37002	5.39091	5.05871	A	P	A	P	P	P	P	chr1	lincRNA-PDE4B	TCATCTGATGTTGCTGAACCTCCTGGACTTGAAGATTCAACAGATGGCTCCGCCATATTT	400	DN918054	lincRNA	-	67423817	66890612	noncoding	natural antisense	NM_001077703	MIER1	mesoderm induction early response protein 1	+	67390577	67454302
ASHG19A3L0000165	20.9875	18.5065	16.3548	77.0266	43.9343	45.1034	38.9775	4.55629	4.51103	4.2908	6.14613	5.37002	5.39091	5.05871	A	P	A	P	P	P	P	chr1	lincRNA-PDE4B	TCATCTGATGTTGCTGAACCTCCTGGACTTGAAGATTCAACAGATGGCTCCGCCATATTT	400	DN918054	lincRNA	-	67423817	66890612	noncoding	intronic antisense	NM_032291	SGIP1	SH3-containing GRB2-like protein 3-interacting	+	66999824	67210768
ASHG19A3L0000165	20.9875	18.5065	16.3548	77.0266	43.9343	45.1034	38.9775	4.55629	4.51103	4.2908	6.14613	5.37002	5.39091	5.05871	A	P	A	P	P	P	P	chr1	lincRNA-PDE4B	TCATCTGATGTTGCTGAACCTCCTGGACTTGAAGATTCAACAGATGGCTCCGCCATATTT	400	DN918054	lincRNA	-	67423817	66890612	noncoding	natural antisense	NM_001077702	MIER1	mesoderm induction early response protein 1	+	67390577	67454302
ASHG19A3A034138	66.0192	44.9969	57.9357	63.9538	36.6498	31.0212	34.8505	6.17546	5.66865	6.03385	5.86325	5.09809	4.82753	4.88895	P	P	P	P	P	P	M	chr7		AACCTGCTAGATCCCACAGCCAACCTTAATAGTCACTTTTGAAAAGTCCTGGAAATACAA	454	G36719	misc_RNA	+	30555447	30554993	noncoding	intergenic
ASHG19A3A041331	22.3571	17.1121	14.4156	14.7471	11.9065	15.1409	16.5958	4.64758	4.4148	4.10976	3.62228	3.36191	3.71856	3.73167	A	P	A	P	A	P	P	chrX	LL0XNC01-237H1.2	ATATATTAACATACCAAGTAGTCTAGGAGCAGCCACTGGGCGAACACCAAACCTTGCATC	1133	ENST00000426528	Ensembl	+	102161086	102139341	noncoding	intergenic
ASHG19A3A030882	827.941	869.223	798.946	660.244	705.237	715.886	730.066	9.59668	9.67526	9.60904	9.40418	9.56168	9.55484	9.49957	P	P	P	P	P	P	P	chr6	AK023629	AATTCTCGGGCTGTGCTGGGATGGAGATTAGAGGCCAAATAAAAACCTCTGGTAAGTAGT	2287	uc003mts.1	UCSC_knowngene	+	2284008	2246031	noncoding	bidirectional	NM_001500	GMDS	"GDP-mannose 4,6 dehydratase"	-	1624040	2245846
ASHG19A3A024075	136.953	137.931	142.293	131.307	198.273	219.777	234.032	7.18512	7.19156	7.27246	6.93512	7.63538	7.75846	7.76487	P	P	P	P	P	P	P	chr4	RP11-617D20.1	TTCTGCCAGTTCCTTGCTCCATAACCCCTAGAAAATTACTTCTGTCTGAGCCTTGGGATT	513	ENST00000515436	Ensembl	-	38621217	38619907	noncoding	intergenic
ASHG19A3A048479	19.2166	18.1723	15.8199	60.7095	69.1355	70.1331	78.5577	4.43246	4.48751	4.2463	5.78405	6.05612	6.05459	6.11328	A	P	A	P	P	P	P	chr12	AC010198.2	TACCTGTTAGAAAGCAATGTGCTTGATACTAGATACTGCCTGTTAAATGTGTTACATGAA	1551	ENST00000500076	Ensembl	+	30933672	30908007	noncoding	bidirectional	NM_032156	CAPRIN2	caprin-2 isoform 3	-	30862485	30907448
ASHG19A3A048479	19.2166	18.1723	15.8199	60.7095	69.1355	70.1331	78.5577	4.43246	4.48751	4.2463	5.78405	6.05612	6.05459	6.11328	A	P	A	P	P	P	P	chr12	AC010198.2	TACCTGTTAGAAAGCAATGTGCTTGATACTAGATACTGCCTGTTAAATGTGTTACATGAA	1551	ENST00000500076	Ensembl	+	30933672	30908007	noncoding	bidirectional	NM_001002259	CAPRIN2	caprin-2 isoform 1	-	30862485	30907448
ASHG19A3A048479	19.2166	18.1723	15.8199	60.7095	69.1355	70.1331	78.5577	4.43246	4.48751	4.2463	5.78405	6.05612	6.05459	6.11328	A	P	A	P	P	P	P	chr12	AC010198.2	TACCTGTTAGAAAGCAATGTGCTTGATACTAGATACTGCCTGTTAAATGTGTTACATGAA	1551	ENST00000500076	Ensembl	+	30933672	30908007	noncoding	bidirectional	NM_001206856	CAPRIN2	caprin-2 isoform 4	-	30862485	30907448
ASHG19A3A048479	19.2166	18.1723	15.8199	60.7095	69.1355	70.1331	78.5577	4.43246	4.48751	4.2463	5.78405	6.05612	6.05459	6.11328	A	P	A	P	P	P	P	chr12	AC010198.2	TACCTGTTAGAAAGCAATGTGCTTGATACTAGATACTGCCTGTTAAATGTGTTACATGAA	1551	ENST00000500076	Ensembl	+	30933672	30908007	noncoding	bidirectional	NM_023925	CAPRIN2	caprin-2 isoform 2	-	30862485	30907448
ASHG19A3A022958	94.7239	75.8678	79.8289	127.739	67.8625	54.895	41.5771	6.68349	6.37221	6.47981	6.8959	6.02798	5.68253	5.15908	P	P	P	P	P	P	P	chr3	MT-ND1	TAGTGCTTTGCAGATGACACATCTCTATGCCTGTCCTAATATCTAGTACCCCACCTCGAA	898	ENST00000465177	Ensembl	+	106620812	106619914	noncoding	intergenic
ASHG19A3A030728	100.137	102.696	99.1575	86.842	88.3707	93.2495	98.9129	6.76335	6.78906	6.77334	6.32905	6.41491	6.46587	6.45231	P	P	P	P	P	P	P	chr6		GCCAACATAAAATACAAAGCCAGGGTATAAGACTTCATGTAGGTGGTAATTTAAACTAAC	4625	AK124909	misc_RNA	-	154722738	154718118	noncoding	intergenic
ASHG19A3L0003268	38.3215	31.0478	40.3011	31.047	29.4745	35.3069	37.7384	5.40852	5.17292	5.53318	4.77558	4.77395	5.02087	5.01049	P	P	P	P	P	P	P	chr16	lincRNA-MPV17L	TGTCATAAAAAGCACGCTGTGGACCATTAGTTTGCAACTGCCAACCTAAAATATCATAGA	9281	chr16:15507881-15517161-	lincRNA	-	15517161	15507881	noncoding	intergenic
ASHG19A3A023423	37.9019	29.0075	38.6314	40.8103	37.9342	38.5622	47.9855	5.3928	5.08318	5.47603	5.18464	5.15229	5.15554	5.37265	P	P	P	P	P	P	P	chr3	RP11-451G4.3	ACCATGGGTCTTTTACTGTTATGTGACCTTTGGCAATTCTGGGCTTGAACTTTCCTACTG	444	ENST00000470024	Ensembl	+	155011965	155008976	noncoding	intergenic
ASHG19A3L0002441	67.5597	65.618	50.1592	64.6239	57.9889	52.0569	79.0692	6.21075	6.17477	5.83296	5.87733	5.79297	5.6027	6.12459	P	P	P	P	P	P	P	chr9	lincRNA-TUSC1	AGTGATACCTAAATTTAACTCCAAGGCCTGTAAGACACCCATAAGCCATCCATCCATTCA	36345	chr9:26772419-26808763-	lincRNA	-	26808763	26772419	noncoding	intergenic
ASHG19A3L0000996	16.8844	12.7064	11.7912	18.6202	16.0482	15.6742	16.604	4.23987	4.05263	3.84212	3.99248	3.84832	3.7727	3.73298	A	A	A	P	P	P	P	chr18	lincRNA-NETO1-2	CTGAAGCAGAGATTCAGAAAAAAGCTAAAGGAGTTGACTTGCTTGAGTGTATGCCCCTGG	493	CR737958	lincRNA	-	71701396	71581639	noncoding	intergenic
ASHG19A3A032333	26.954	27.1382	18.9239	66.1971	63.9552	70.2856	79.877	4.92094	4.99723	4.49041	5.91265	5.94062	6.05793	6.14015	P	P	P	P	P	P	P	chr6	RP11-568A7.2	AAGAAAGAAAAGGCAAGAACGTCAGCGATGGCTCCACTGACTGATTAAGGCAAAGGAAGT	205	ENST00000439207	Ensembl	+	167659404	167655378	noncoding	intergenic
ASHG19A3L0002633	48.2055	43.6443	43.6241	33.2084	73.7458	33.0245	90.6878	5.7312	5.62618	5.64256	4.87305	6.14762	4.92037	6.32299	P	P	P	P	P	P	P	chr11	lincRNA-POLD3	GAAAATGGTTCTGCCTTCCGTAAATCCCATTCCAGGATAGAACTTTAAAAAGTACTATAC	724	CB241183	lincRNA	-	74358680	74357973	noncoding	intergenic
ASHG19A3A026461	5	5.8861	5	18.8898	26.719	16.3566	28.6602	2.37766	3.09633	2.39437	4.01524	4.62217	3.84442	4.58945	A	A	A	P	P	P	P	chr5	CTD-2245E15.3	TATGCAACCAAAATGTCCTGGGAATTCAGAGCCAAAGGCAGCATTCTTAGGAAATGCCTC	692	ENST00000503113	Ensembl	-	1551825	1544221	noncoding	intergenic
ASHG19A3A038207	28.1546	20.1416	19.8656	59.4223	34.1794	46.3648	41.3707	4.97815	4.61455	4.55921	5.75236	4.99384	5.43211	5.15185	A	P	P	P	P	P	P	chr9		AAGTTCATCTCAGGTTTAATGGGGGCACTGCTGCCTCAGAAGCCAGGCAGTGGGTGGTGA	1247	BC009060	misc_RNA	-	139000927	138999696	noncoding	intergenic
ASHG19A3A033628	2781.73	2741.82	2546.49	3282.62	3149.92	3194.6	3357.94	11.2855	11.2693	11.2236	11.7899	11.7689	11.759	11.7698	P	P	P	P	P	P	P	chr7	AK098095	CTGCTCAGGTCCCTTCATTTGTACTTTGGAGTTTTTCTCATGTAAATTTGTATAACAGAA	2750	uc003vwb.1	UCSC_knowngene	-	140421887	140419137	noncoding	intergenic
ASHG19A3L0002887	19.3966	5.27527	16.1863	28.4906	24.6755	17.5838	17.0751	4.446	2.33297	4.2785	4.64681	4.50255	3.9583	3.77732	A	P	A	P	P	P	P	chr10	lincRNA-ANAPC16	TAATATGTTGTCCCACCGAGCTATTTTTATTGAATGGGAAAACCTCGTGCCGAATTCTTG	537	AW451816	lincRNA	-	74008659	74008147	noncoding	intergenic
ASHG19A3L0002914	92.4515	79.1319	84.0293	114.498	104.539	110.358	134.883	6.64814	6.42898	6.55356	6.72784	6.66752	6.71588	6.92576	P	P	P	P	P	P	P	chr12	lincRNA-NUDT4-2	CCTGAGATCATATTATTTTCCTTTAAGGATTTGCTTCATCCCAGGTGTTCATCTAATCCT	489	AI859713	lincRNA	+	93382860	93382371	noncoding	intergenic
ASHG19A3L0000836	320.141	302.056	303.649	387.55	378.909	256.732	462.8	8.33254	8.24224	8.2998	8.58279	8.60726	7.99369	8.79869	P	P	P	P	P	P	P	chr15	lincRNA-RASGRF1-2	AGTAGGGTCCTCCCCAGCCTTAGAGACCTTTCCAGTCAAGACCACCATGTACAGTGATTC	336	Z41842	lincRNA	-	79413788	79413452	noncoding	intergenic
ASHG19A3A035662	52.8702	60.0535	54.8488	64.0914	73.2395	83.2625	85.7401	5.86092	6.05293	5.95708	5.86655	6.13567	6.29361	6.24333	P	P	P	P	P	P	P	chr8	C8orf75	TTCAGGATTGCAAGATTTCAGCTACTGTCTCTCCTCGGAGCAGGATTCCATCTTTTCCAT	1301	ENST00000506121	Ensembl	-	29583939	29578777	noncoding	intergenic
ASHG19A3L0000128	210.947	207.061	168.852	176.899	80.4399	191.845	72.8351	7.76884	7.74319	7.50036	7.3908	6.27769	7.5525	5.99606	P	P	P	P	P	P	P	chr1	lincRNA-RRAGC-1	GGTAAAAAGATGCCTCAAGGAACATCTACCGATCCCCTCTAGAACACTGTTTTGAGAAGG	12101	chr1:39116163-39128263+	lincRNA	+	39128263	39116163	noncoding	intergenic
ASHG19A3L0000765	4278.83	4584.42	3857.77	2887.68	1362.99	1091.39	1336.2	11.8972	12.0162	11.813	11.6033	10.5452	10.194	10.4241	P	P	P	P	P	P	P	chr14	lincRNA-RGS6-1	ATTCATCTTTGTCTTGGACATTTTGGATGACTCTCCCCTCCTGGGACTAGAGACAAACTG	438	AI734132	lincRNA	-	73059107	73058669	noncoding	intergenic
ASHG19A3A012638	120.076	64.7669	103.425	134.744	78.9395	54.6605	46.3873	7.00728	6.15564	6.83202	6.97543	6.25048	5.67677	5.32154	P	P	P	P	P	P	P	chr1	RP11-169K16.9	GGGCGTCTTTCACTAATTTTTCCTAGGTTTTCTCTTCTATCGGGCTCTGTGGTCCTTTCA	2468	ENST00000317122	Ensembl	-	16174642	16160973	noncoding	natural antisense	NM_015001	SPEN	msx2-interacting protein	+	16174358	16266950
ASHG19A3L0001135	123.938	105.865	115.408	150.747	86.2137	46.7715	59.4953	7.04873	6.82818	6.9817	7.14436	6.3793	5.44505	5.69561	P	P	P	P	P	P	P	chr2	lincRNA-OSR1-1	TCTTGTGTTTGTGATCAGCACTTCCAATCCTCTTTGCCCTGAGTAGTATTTGATTGTAGA	10351	chr2:19979944-19990294-	lincRNA	-	19990294	19979944	noncoding	intergenic
ASHG19A3A041679	511.224	506.045	509.498	264.645	250.092	236.852	252.566	8.95734	8.93989	8.99235	8.00616	7.99467	7.87363	7.88528	P	P	P	P	P	P	P	chrX		AAGAAGTGTACTCACACTGCCCCAACACCAGTGAGTGGAAATATTTATAGGTCTCTCATT	2959	U66048	NRED	+	149131935	149128983	noncoding	intergenic
ASHG19A3A020412	62.704	44.8302	40.0194	50.7776	77.0652	68.3595	80.46	6.09798	5.66414	5.52176	5.52148	6.21443	6.01132	6.15206	P	P	P	P	P	P	P	chr1	RP5-884C9.2	CAGCCAGCCTTAAGGAGTGGACATCCTGCCTGGTGAAACTGAACAAGACACCTACCGCAT	573	ENST00000428151	Ensembl	+	38584697	38513096	noncoding	bidirectional	NM_002699	POU3F1	"POU domain, class 3, transcription factor 1"	-	38509522	38512450
ASHG19A3A025419	36.8271	27.2885	28.2734	62.9642	12.4607	42.6245	30.5813	5.35534	5.00376	5.04464	5.83866	3.43945	5.30592	4.68681	A	P	M	P	A	P	P	chr4	RP11-83C7.1	AGTAATATGGCTCAAGATTTTTGAACTGCCCAGGCTCTACTCAGGCTCTTGGACATCTTG	500	ENST00000503465	Ensembl	+	38387380	38368534	noncoding	intergenic
ASHG19A3A024204	125.204	121.458	110.276	129.277	54.4412	102.664	72.469	7.06206	7.01672	6.92476	6.91134	5.69518	6.61052	5.98845	P	P	P	P	P	P	P	chr4		ATATTAATCCAGGGCTGACACCACTTGAAGATAAGCCCGTTCCTCTCTCTGGTATATTCT	1220	CR604878	NRED	-	56815341	56814122	noncoding	natural antisense	NM_025009	CEP135	centrosomal protein of 135 kDa	+	56815036	56899527
ASHG19A3A023943	32.829	36.1107	33.6978	74.7592	28.9113	21.4649	28.7856	5.19296	5.37685	5.28125	6.09842	4.74817	4.26939	4.59643	P	P	P	P	P	P	P	chr4	AC006499.7	TATACAATCGTGGTGACAACTTTCACCTCAGACTTTGCTGGCCTTGTGGGGATAGAATCA	607	ENST00000511169	Ensembl	-	10169389	10168782	noncoding	intergenic
ASHG19A3A038206	624.088	557.486	512.725	1001.02	616.961	587.966	536.74	9.22994	9.06522	8.99877	10.0409	9.35666	9.25004	9.03129	P	P	P	P	P	P	P	chr9		TTTCAAATTGTGCTGTGATAACCCTGGCTGTCTTCCTGCTCCCATAGTGGATAAAAGCGT	724	HIT000086764	H-invDB	-	139000884	138999587	noncoding	intergenic
ASHG19A3L0002274	207.837	183.246	201.305	232.933	179.198	223.158	241.097	7.74956	7.57316	7.74074	7.80911	7.48133	7.78326	7.81233	P	P	P	P	P	P	P	chrX	lincRNA-ATP11C-2	TGCTGTAGTCCACTATAATTTCCAAAATCATTATAGTTCCCACCACCACCATAGTTACCA	766	AW391396	lincRNA	-	139115600	138516716	noncoding	intron sense-overlapping	NM_001013403	CXorf66	hypothetical protein LOC347487 precursor	-	139037883	139047677
ASHG19A3L0002274	207.837	183.246	201.305	232.933	179.198	223.158	241.097	7.74956	7.57316	7.74074	7.80911	7.48133	7.78326	7.81233	P	P	P	P	P	P	P	chrX	lincRNA-ATP11C-2	TGCTGTAGTCCACTATAATTTCCAAAATCATTATAGTTCCCACCACCACCATAGTTACCA	766	AW391396	lincRNA	-	139115600	138516716	noncoding	intron sense-overlapping	NM_001171876	MCF2	proto-oncogene DBL isoform c	-	138663929	138790381
ASHG19A3L0002274	207.837	183.246	201.305	232.933	179.198	223.158	241.097	7.74956	7.57316	7.74074	7.80911	7.48133	7.78326	7.81233	P	P	P	P	P	P	P	chrX	lincRNA-ATP11C-2	TGCTGTAGTCCACTATAATTTCCAAAATCATTATAGTTCCCACCACCACCATAGTTACCA	766	AW391396	lincRNA	-	139115600	138516716	noncoding	intron sense-overlapping	NM_001099855	MCF2	proto-oncogene DBL isoform a	-	138663929	138790381
ASHG19A3L0002274	207.837	183.246	201.305	232.933	179.198	223.158	241.097	7.74956	7.57316	7.74074	7.80911	7.48133	7.78326	7.81233	P	P	P	P	P	P	P	chrX	lincRNA-ATP11C-2	TGCTGTAGTCCACTATAATTTCCAAAATCATTATAGTTCCCACCACCACCATAGTTACCA	766	AW391396	lincRNA	-	139115600	138516716	noncoding	intron sense-overlapping	NM_005369	MCF2	proto-oncogene DBL isoform b	-	138663929	138725000
ASHG19A3L0002274	207.837	183.246	201.305	232.933	179.198	223.158	241.097	7.74956	7.57316	7.74074	7.80911	7.48133	7.78326	7.81233	P	P	P	P	P	P	P	chrX	lincRNA-ATP11C-2	TGCTGTAGTCCACTATAATTTCCAAAATCATTATAGTTCCCACCACCACCATAGTTACCA	766	AW391396	lincRNA	-	139115600	138516716	noncoding	intron sense-overlapping	NM_001171877	MCF2	proto-oncogene DBL isoform d	-	138663929	138725000
ASHG19A3L0002274	207.837	183.246	201.305	232.933	179.198	223.158	241.097	7.74956	7.57316	7.74074	7.80911	7.48133	7.78326	7.81233	P	P	P	P	P	P	P	chrX	lincRNA-ATP11C-2	TGCTGTAGTCCACTATAATTTCCAAAATCATTATAGTTCCCACCACCACCATAGTTACCA	766	AW391396	lincRNA	-	139115600	138516716	noncoding	intron sense-overlapping	NM_001010986	ATP11C	probable phospholipid-transporting ATPase IG	-	138808504	138914447
ASHG19A3L0002274	207.837	183.246	201.305	232.933	179.198	223.158	241.097	7.74956	7.57316	7.74074	7.80911	7.48133	7.78326	7.81233	P	P	P	P	P	P	P	chrX	lincRNA-ATP11C-2	TGCTGTAGTCCACTATAATTTCCAAAATCATTATAGTTCCCACCACCACCATAGTTACCA	766	AW391396	lincRNA	-	139115600	138516716	noncoding	intron sense-overlapping	NM_173694	ATP11C	probable phospholipid-transporting ATPase IG	-	138808504	138914447
ASHG19A3L0002274	207.837	183.246	201.305	232.933	179.198	223.158	241.097	7.74956	7.57316	7.74074	7.80911	7.48133	7.78326	7.81233	P	P	P	P	P	P	P	chrX	lincRNA-ATP11C-2	TGCTGTAGTCCACTATAATTTCCAAAATCATTATAGTTCCCACCACCACCATAGTTACCA	766	AW391396	lincRNA	-	139115600	138516716	noncoding	intronic antisense	NM_000133	F9	coagulation factor IX preproprotein	+	138612894	138645617
ASHG19A3L0002274	207.837	183.246	201.305	232.933	179.198	223.158	241.097	7.74956	7.57316	7.74074	7.80911	7.48133	7.78326	7.81233	P	P	P	P	P	P	P	chrX	lincRNA-ATP11C-2	TGCTGTAGTCCACTATAATTTCCAAAATCATTATAGTTCCCACCACCACCATAGTTACCA	766	AW391396	lincRNA	-	139115600	138516716	noncoding	intron sense-overlapping	NM_001171878	MCF2	proto-oncogene DBL isoform e	-	138663929	138725000
ASHG19A3L0002274	207.837	183.246	201.305	232.933	179.198	223.158	241.097	7.74956	7.57316	7.74074	7.80911	7.48133	7.78326	7.81233	P	P	P	P	P	P	P	chrX	lincRNA-ATP11C-2	TGCTGTAGTCCACTATAATTTCCAAAATCATTATAGTTCCCACCACCACCATAGTTACCA	766	AW391396	lincRNA	-	139115600	138516716	noncoding	intron sense-overlapping	NM_001171879	MCF2	proto-oncogene DBL isoform f	-	138663929	138725000
ASHG19A3L0002632	58.002	38.5186	51.1077	59.8826	103.673	56.7423	114.18	5.9917	5.46128	5.86	5.76388	6.65617	5.734	6.67426	P	P	P	P	P	P	P	chr11	lincRNA-FAM181B	TAGGTGTTTGTGACTCAGGGAGTGGGTATAAGGTGTCCCTTTCTGGGATGTTTTCTTTTC	5801	chr11:79223852-79229652+	lincRNA	+	79229652	79223852	noncoding	intergenic
ASHG19A3L0000291	711.957	540.759	676.569	510.068	697.84	437.314	816.433	9.40165	9.02497	9.38304	9.02063	9.54589	8.79624	9.66857	P	P	P	P	P	P	P	chr10	lincRNA-PTEN-1	AGTCTTCATATTTTGAGCCTGTCGTTCCTCTCATATGTCCCACTCCCTTTTCATACTGTA	1121	AK296262	lincRNA	-	90343015	89892056	noncoding	exon sense-overlapping	NM_001031709	RNLS	renalase isoform 1	-	90043858	90343082
ASHG19A3L0000291	711.957	540.759	676.569	510.068	697.84	437.314	816.433	9.40165	9.02497	9.38304	9.02063	9.54589	8.79624	9.66857	P	P	P	P	P	P	P	chr10	lincRNA-PTEN-1	AGTCTTCATATTTTGAGCCTGTCGTTCCTCTCATATGTCCCACTCCCTTTTCATACTGTA	1121	AK296262	lincRNA	-	90343015	89892056	noncoding	exon sense-overlapping	NM_018363	RNLS	renalase isoform 2	-	90033620	90343082
ASHG19A3L0003103	25.1006	23.2145	35.2147	27.374	62.9222	32.7594	60.2343	4.81954	4.79268	5.34293	4.5881	5.91808	4.90871	5.71188	A	P	P	P	P	P	P	chr5	lincRNA-PIK3R1-1	TCTAGGGTCTCTCATCTGTGGTCTCTAATTTATTGAGGCCCAATGAATCTGCCTAAAGAC	694	BG925420	lincRNA	-	68024476	68023867	noncoding	intergenic
ASHG19A3L0001000	28.2475	9.23327	9.85165	17.5583	52.2214	24.6861	58.996	4.98244	3.68425	3.59957	3.90069	5.62967	4.48489	5.68273	A	P	A	P	P	P	P	chr18	lincRNA-C18orf62-2	ATACTGTGGTGGTGTTATGGCAAGTTTCACTTAATTGCTTTAACAATGATGCTCACCATA	488	BX091014	lincRNA	+	73035515	73034901	noncoding	intergenic
ASHG19A3A036817	167.252	154.538	120.389	98.5569	100.927	80.726	86.984	7.4579	7.34443	7.04051	6.51144	6.61332	6.25092	6.26316	P	P	M	P	P	P	P	chr8	CR608006	ATTCTGTGACGTGTACCCAGTATTTATTGGAGGGTATTTCCTAGCAAGAAAATGAGGGCG	2774	uc003ykw.1	UCSC_knowngene	+	103822203	103819049	noncoding	intergenic
ASHG19A3L0000050	156.479	156.697	122.586	70.3114	69.2784	56.0553	65.6996	7.36227	7.36294	7.06509	6.00619	6.05907	5.71394	5.84428	P	P	P	P	P	P	P	chr1	lincRNA-KCNT2-2	GTTGATGGTGTTGAACTTTAATCTCAGGATTAATAACTGTTAAATAGAAGCGTGGCATGA	868	BG679513	lincRNA	+	193255677	193254821	noncoding	intergenic
ASHG19A3L0000483	38.9401	23.7616	35.9231	66.9526	30.0388	21.3096	28.457	5.43242	4.82304	5.37379	5.9298	4.8012	4.25849	4.57729	A	P	P	P	P	P	P	chr12	lincRNA-ALG10-1	TTTTACTTTACTTTCTTTCTTCCTTTGTTGAGCTTGAGTAGGGGGTACAGGGGTGAGGGT	403	BQ447228	lincRNA	-	38450755	38450353	noncoding	intergenic
ASHG19A3A043752	37.7818	25.7194	35.4375	45.0704	51.0506	54.3783	60.7913	5.38853	4.92162	5.35202	5.3383	5.59318	5.67071	5.7248	A	P	P	P	P	P	P	chr10	RP11-534G20.3	TTCCCAAATGTCACCCACTTCTCAGGACCATTATCAGTGTCATGTGCGTGGGTTAATGAA	767	ENST00000413405	Ensembl	+	29776674	29698467	noncoding	natural antisense	NM_021738	SVIL	supervillin isoform 2	-	29746276	29923901
ASHG19A3A043752	37.7818	25.7194	35.4375	45.0704	51.0506	54.3783	60.7913	5.38853	4.92162	5.35202	5.3383	5.59318	5.67071	5.7248	A	P	P	P	P	P	P	chr10	RP11-534G20.3	TTCCCAAATGTCACCCACTTCTCAGGACCATTATCAGTGTCATGTGCGTGGGTTAATGAA	767	ENST00000413405	Ensembl	+	29776674	29698467	noncoding	natural antisense	NM_003174	SVIL	supervillin isoform 1	-	29746276	30024730
ASHG19A3A013635	173.896	129.786	169.834	155.165	394.79	187.866	395.842	7.508	7.10675	7.50917	7.18901	8.66526	7.52181	8.55933	P	P	P	P	P	P	P	chr2	AC008280.1	GAAAAAGAAGGAAGCCAAAGAGAAAGTTACCTGGATTCAACTGAAGCACCAGTCAGCTCC	412	ENST00000418851	Ensembl	-	54257819	54256688	noncoding	intergenic
ASHG19A3L0001330	55.5407	56.7451	62.1394	39.663	76.1905	91.127	97.6042	5.93226	5.97783	6.13049	5.14296	6.19864	6.43228	6.4316	P	P	P	P	P	P	P	chr3	lincRNA-RAP2B-1	CCACCTCTAGCATTTATTTAATGTGACATTTAAATCTTTTGTGCTTCAGTTTCCTGACAC	359	AA420793	lincRNA	+	152716874	152716537	noncoding	intergenic
ASHG19A3L0003293	68.0577	60.8143	63.9351	48.2497	66.7595	51.2759	73.2234	6.21941	6.06959	6.16631	5.43537	6.00357	5.57936	6.00523	P	P	P	P	P	M	M	chr3	lincRNA-KALRN	GGAGAAAGATGTGGGTCTACATTTTGAAATATATGCCTTGAACAAGAATTATGCACCTAT	2096	AK123068	lincRNA	+	123883532	123752541	noncoding	intron sense-overlapping	NM_001024660	KALRN	kalirin isoform 1	+	123813557	124440036
ASHG19A3L0003293	68.0577	60.8143	63.9351	48.2497	66.7595	51.2759	73.2234	6.21941	6.06959	6.16631	5.43537	6.00357	5.57936	6.00523	P	P	P	P	P	M	M	chr3	lincRNA-KALRN	GGAGAAAGATGTGGGTCTACATTTTGAAATATATGCCTTGAACAAGAATTATGCACCTAT	2096	AK123068	lincRNA	+	123883532	123752541	noncoding	intron sense-overlapping	NM_003947	KALRN	kalirin isoform 2	+	123813557	124238698
ASHG19A3L0001866	436.351	386.199	457.577	398.036	675.395	445.538	758.09	8.75761	8.58279	8.85075	8.62764	9.50101	8.82865	9.55719	P	P	P	P	P	P	P	chr7	lincRNA-MICALL2	TTATATTGAAGTATTATTATTATTCGATGTCTGTCCCCACACTCCTAGCCAGCCTCCACC	18151	chr7:1348449-1366599+	lincRNA	+	1366599	1348449	noncoding	intergenic
ASHG19A3A035125	192.016	228.642	168.603	130.417	245.68	201.316	246.119	7.64777	7.87242	7.49766	6.92366	7.9657	7.62283	7.84395	P	P	P	P	P	P	P	chr7	AC024084.1	ACATCTCCATTTTCACATAAGCTCCCCAACTCTCAAGAAGACATGTCAAACTTCAAAGAA	457	ENST00000440744	Ensembl	+	135769416	135710508	noncoding	intergenic
ASHG19A3A046467	2943.34	2970.48	2591.2	2759.99	2655.39	2652.08	2562.52	11.3651	11.3849	11.2497	11.5341	11.5222	11.4849	11.3727	P	P	P	P	P	P	P	chr1	RP4-592A1.2	ATCAGATGATAATGAAAAGGCCTTGAAAATCTGCCGGCAAGCCTACCACACTCAAACCAC	690	ENST00000427762	Ensembl	-	59097202	59096512	noncoding	intergenic
ASHG19A3A031214	51.9734	65.3543	47.2012	118.405	74.4151	53.635	64.7833	5.83736	6.16848	5.74965	6.77945	6.16245	5.65142	5.82456	P	P	P	P	P	P	P	chr6	HCG9P5	AGAGAAGTCGCAGGAAGAATCCTCTGCCCGGAGCCTGCAGACTCCAACCCCTCAGCGTGA	225	ENST00000435408	Ensembl	+	29716290	29716065	noncoding	intergenic
ASHG19A3A034710	163.629	161.417	124.257	189.148	134.928	116.235	120.49	7.42881	7.40272	7.08553	7.49276	7.05147	6.79443	6.75853	P	P	P	P	P	P	P	chr7	AC002454.1	ATTAAAACCCCTGAAAGCTGCCACACCGTGAAAACAAGGCCTCCTTCACATTAAAGGCAA	432	ENST00000435695	Ensembl	+	92546501	92465796	noncoding	natural antisense	NM_001145306	CDK6	cyclin-dependent kinase 6	-	92234234	92465941
ASHG19A3L0000789	64.3551	48.7039	56.3785	63.921	86.5845	57.4341	101.648	6.1356	5.77224	5.99528	5.86209	6.38563	5.74857	6.49413	P	P	P	P	P	P	P	chr14	lincRNA-FAM181A	TAAGACATATCCCATCTAGTTGCTTGTCCCTATTTCTGTGGTGAGGAAGGTCCTCTATGG	10701	chr14:94335247-94345947+	lincRNA	+	94345947	94335247	noncoding	intergenic
ASHG19A3L0002573	194.069	150.352	174.221	204.937	235.279	172.547	268.627	7.66172	7.30478	7.54472	7.60972	7.89515	7.3927	7.97591	P	P	P	P	P	P	P	chr2	lincRNA-PAIP2B	TAAAATACCATTATAATGAGCAGCTGCTATTTTTGCCTTCCCAGCGTTCATCCCCTCTTC	543	DB299428	lincRNA	-	71534673	71534130	noncoding	intergenic
ASHG19A3L0001479	1289.27	1147.13	1272.43	5040.36	5401.22	4826.59	5042.75	10.2064	10.0491	10.2385	12.4274	12.5598	12.3584	12.3467	P	P	P	P	P	P	P	chr4	lincRNA-SEPSECS-1	TTTACTCATGAAAAAGAAAACAGTGAAGGCCCCCTCCTCATGGCTTTCTTCCAACAAACT	12026	chr4:25089927-25101952+	lincRNA	+	25101952	25089927	noncoding	intergenic
ASHG19A3A049666	54.9498	19.6402	29.4915	14.7846	14.9698	5	22.0585	5.9167	4.58399	5.10349	3.62765	3.73769	2.32995	4.18279	A	P	P	P	A	A	P	chr13	RP11-512C24.1	AGCGAATTAATATACATGTTCAGCATTTTAAGCACTTGAAGAGCCAAGATAGCATCCTGA	481	ENST00000413857	Ensembl	-	74952088	74951299	noncoding	intergenic
ASHG19A3L0000634	823.836	879.182	812.882	612.577	742.592	726.117	783.077	9.58998	9.694	9.6326	9.29093	9.63408	9.57583	9.60337	P	P	P	P	P	P	P	chr13	lincRNA-NUDT15-2	GTCCTGTCTAGGGAACTTATAGAAATGCTGGCAATTTCAAGAAACCAAAAGTTGTTACAG	950	CR590107	lincRNA	-	48669198	48627461	noncoding	exon sense-overlapping	NM_014166	MED4	mediator of RNA polymerase II transcription	-	48650091	48669240
ASHG19A3L0000026	38.3821	41.0131	33.0817	35.5659	54.2925	74.4406	72.823	5.41064	5.54306	5.25744	4.97874	5.69149	6.13816	5.99557	P	P	P	P	P	P	P	chr1	lincRNA-ETV3-1	TTAAATAGTGTGTATCCTCCAGACAGTCATCTGTGTACCCACAAATACCACAGACCCTGT	15826	chr1:157374626-157390451-	lincRNA	-	157390451	157374626	noncoding	intergenic
ASHG19A3L0001452	124.191	142.965	120.138	204.776	89.495	67.773	105.626	7.05121	7.24069	7.03805	7.60838	6.43311	5.99917	6.55562	P	P	P	P	P	P	P	chr4	lincRNA-ARSJ-2	AATATTTAGCCCGTGTGCTTCTCCCGAAAGCCCCATTTGGCTTTCCCTTCTTATCTAATT	928	BG677629	lincRNA	-	115400748	115399874	noncoding	intergenic
ASHG19A3A034250	35.2041	32.6772	30.1799	57.8189	15.4561	26.4019	20.2076	5.29621	5.24407	5.13634	5.708	3.78977	4.58516	4.0399	P	P	P	P	P	P	P	chr1	FMO7P	AAAGATGTGCAGTATGAGGAAGCATCCTGGTTTCTCTTGCACTGGCCAATGGAACATTGT	768	ENST00000436045	Ensembl	+	166450802	166443981	noncoding	intergenic
ASHG19A3A015714	76.7964	65.2817	62.9569	142.316	120.416	109.939	140.348	6.39511	6.16691	6.14742	7.05888	6.88178	6.71041	6.98824	P	P	P	P	P	P	P	chr2	AC093159.1	ACAAGAGGTGCCATGAGACAGTATATAGTTCATTTCCCCACCGCAAGAGTAAAGGGCTTA	424	ENST00000416845	Ensembl	+	62691205	62690261	noncoding	intergenic
ASHG19A3A007145	45.3291	34.2534	40.6376	17.5884	18.5251	14.67	16.0421	5.64737	5.30385	5.54445	3.9034	4.07716	3.66931	3.67452	P	P	P	A	P	P	P	chr14	MEG3	ACTCCGTGGAAGCACGCTCACAAAGGGCTAATCTCGGGCCTTGTCGAAGGAAGAGGCTGC	1735	NR_033358	RefSeq_NR	+	101327358	101292444	noncoding	intergenic
ASHG19A3L0002258	27.0155	17.442	20.6261	28.8077	33.0923	32.5823	49.3004	4.92381	4.43755	4.60911	4.6658	4.94398	4.90066	5.41086	A	P	P	P	P	P	P	chrX	lincRNA-DCAF12L1	CATTGTAAGGGGTTTCTTTCTTCTTCTGTAAGGCTAATACCTTTCTCAAGTATAAGCCAG	556	AA558434	lincRNA	+	125395925	125395367	noncoding	intergenic
ASHG19A3L0002160	41.2764	35.087	27.6023	24.6491	52.2558	39.0379	67.3275	5.50939	5.33767	5.011	4.42296	5.63073	5.1738	5.88117	P	P	P	P	P	P	P	chr8	lincRNA-TMEM64-1	CTTTCCCAAGTCTTCTCCATGTAATGTAAATTGCATTCCACTGAATTTAGCCTAAAAAAC	847	EB387271	lincRNA	+	91318744	91317897	noncoding	intergenic
ASHG19A3L0003340	17.1198	8.59185	18.1296	45.6411	29.2177	24.7443	26.3181	4.25774	3.60796	4.42735	5.35632	4.76281	4.48894	4.45506	A	A	P	P	P	P	P	chr19	lincRNA-TUBB4	TCAGCCTGGATGATCACCAGCACCAACGTGGCTTTGGCTCGCGGGTTCAAGAGAAAGATG	6266	chr19:6516276-6522541-	lincRNA	-	6522541	6516276	noncoding	intergenic
ASHG19A3L0000628	48.8046	32.0979	45.06	26.7498	30.4509	75.2123	35.2015	5.75188	5.21894	5.68882	4.55265	4.82354	6.15081	4.9061	P	P	P	P	P	P	P	chr13	lincRNA-SERP2-2	AAATAATTTAACAAATTGGGGCCCCCTTTCCTTTAAAAGGGGCAAACTTTCCTTGGGGGG	1101	BM926136	lincRNA	+	44648265	44647904	noncoding	intergenic
ASHG19A3L0000856	5	5.7831	5	16.6756	15.8322	19.6197	21.0949	2.37766	2.98474	2.39437	3.81992	3.82643	4.13174	4.10989	A	A	A	P	P	P	P	chr16	lincRNA-C16orf75-2	TCTGGGCACCAATGACAACGAAGCAGGCAATGAGCTGATGTTGCCGGATGGCTCTATGGC	379	DY655635	lincRNA	-	11478868	11477618	noncoding	intergenic
ASHG19A3L0002508	787.949	950.664	799.697	161.78	169.495	182.846	185.303	9.53368	9.79194	9.60995	7.25463	7.39831	7.47894	7.40661	P	P	P	P	P	P	P	chr1	lincRNA-UFC1	TTTTGTAAAACCTCCCAGGATGATAGTAAGAGTTGGCACAAAAAGAGGTTAATAGGTGCT	687	CN413083	lincRNA	+	161107075	161106389	noncoding	intergenic
ASHG19A3L0000387	107.115	101.943	78.685	132.593	40.3068	134.499	60.853	6.84952	6.77806	6.45648	6.94979	5.24087	7.01511	5.72643	P	P	P	P	P	M	M	chr11	lincRNA-TSPAN18	GTTTGCCTTCCCATTTCTTTTCTTTTCATCCAAGTGCAGAGTAGTGGATGGACATAGGGG	20926	chr11:44720724-44741649+	lincRNA	+	44741649	44720724	noncoding	intergenic
ASHG19A3L0001355	17.2706	8.7393	5	24.0733	20.3954	14.1875	36.953	4.26955	3.62605	2.39437	4.38712	4.22545	3.61089	4.97924	A	A	A	P	P	P	P	chr3	lincRNA-RPL39L-1	AACAGGGCTTATCTACTCCGGTGGCAGAAGATAAATACTCCTTCATTTCTGGGATATTCC	923	CD048049	lincRNA	-	186898696	186838735	noncoding	exon sense-overlapping	NM_052969	RPL39L	60S ribosomal protein L39-like	-	186838740	186857263
ASHG19A3A013540	122871	117975	110105	78065.5	76989	87087.8	76766.8	16.6065	16.6103	16.5836	16.4948	16.4144	16.5773	16.3579	P	P	P	P	P	P	P	chr2	AC009413.2	TATGGCACGGAGTCCCAGGCCAAGGATGTCATTGAAGAGTACTTCAAATGCAAGAAATGA	399	ENST00000414823	Ensembl	-	42077741	42077342	noncoding	intergenic
ASHG19A3L0000086	37529.9	35865.3	32746.6	24092.1	23067.7	23686	23680.3	14.9457	14.9106	14.8396	14.7345	14.6842	14.6911	14.6256	P	P	P	P	P	P	P	chr1	lincRNA-WNT9A	CGAAAAAGACAACCTCTACTTTTTTCTTTAGTATTTGGATAAACACTGAAGCTGGAGCTG	393	BI048312	lincRNA	+	228286740	227598421	noncoding	exon sense-overlapping	NM_001024226	ARF1	ADP-ribosylation factor 1	+	228270360	228286913
ASHG19A3L0000086	37529.9	35865.3	32746.6	24092.1	23067.7	23686	23680.3	14.9457	14.9106	14.8396	14.7345	14.6842	14.6911	14.6256	P	P	P	P	P	P	P	chr1	lincRNA-WNT9A	CGAAAAAGACAACCTCTACTTTTTTCTTTAGTATTTGGATAAACACTGAAGCTGGAGCTG	393	BI048312	lincRNA	+	228286740	227598421	noncoding	intronic antisense	NM_003395	WNT9A	protein Wnt-9a precursor	-	228109164	228135676
ASHG19A3L0000086	37529.9	35865.3	32746.6	24092.1	23067.7	23686	23680.3	14.9457	14.9106	14.8396	14.7345	14.6842	14.6911	14.6256	P	P	P	P	P	P	P	chr1	lincRNA-WNT9A	CGAAAAAGACAACCTCTACTTTTTTCTTTAGTATTTGGATAAACACTGAAGCTGGAGCTG	393	BI048312	lincRNA	+	228286740	227598421	noncoding	intronic antisense	NM_001161465	JMJD4	jmjC domain-containing protein 4 isoform 2	-	227918889	227923112
ASHG19A3L0000086	37529.9	35865.3	32746.6	24092.1	23067.7	23686	23680.3	14.9457	14.9106	14.8396	14.7345	14.6842	14.6911	14.6256	P	P	P	P	P	P	P	chr1	lincRNA-WNT9A	CGAAAAAGACAACCTCTACTTTTTTCTTTAGTATTTGGATAAACACTGAAGCTGGAGCTG	393	BI048312	lincRNA	+	228286740	227598421	noncoding	exon sense-overlapping	NM_001024227	ARF1	ADP-ribosylation factor 1	+	228270850	228286913
ASHG19A3L0000086	37529.9	35865.3	32746.6	24092.1	23067.7	23686	23680.3	14.9457	14.9106	14.8396	14.7345	14.6842	14.6911	14.6256	P	P	P	P	P	P	P	chr1	lincRNA-WNT9A	CGAAAAAGACAACCTCTACTTTTTTCTTTAGTATTTGGATAAACACTGAAGCTGGAGCTG	393	BI048312	lincRNA	+	228286740	227598421	noncoding	exon sense-overlapping	NM_001024228	ARF1	ADP-ribosylation factor 1	+	228270850	228286913
ASHG19A3L0000086	37529.9	35865.3	32746.6	24092.1	23067.7	23686	23680.3	14.9457	14.9106	14.8396	14.7345	14.6842	14.6911	14.6256	P	P	P	P	P	P	P	chr1	lincRNA-WNT9A	CGAAAAAGACAACCTCTACTTTTTTCTTTAGTATTTGGATAAACACTGAAGCTGGAGCTG	393	BI048312	lincRNA	+	228286740	227598421	noncoding	intronic antisense	NM_023007	JMJD4	jmjC domain-containing protein 4 isoform 1	-	227918889	227923112
ASHG19A3L0000086	37529.9	35865.3	32746.6	24092.1	23067.7	23686	23680.3	14.9457	14.9106	14.8396	14.7345	14.6842	14.6911	14.6256	P	P	P	P	P	P	P	chr1	lincRNA-WNT9A	CGAAAAAGACAACCTCTACTTTTTTCTTTAGTATTTGGATAAACACTGAAGCTGGAGCTG	393	BI048312	lincRNA	+	228286740	227598421	noncoding	intron sense-overlapping	NM_053052	SNAP47	synaptosomal-associated protein 47	+	227922696	227968932
ASHG19A3L0000086	37529.9	35865.3	32746.6	24092.1	23067.7	23686	23680.3	14.9457	14.9106	14.8396	14.7345	14.6842	14.6911	14.6256	P	P	P	P	P	P	P	chr1	lincRNA-WNT9A	CGAAAAAGACAACCTCTACTTTTTTCTTTAGTATTTGGATAAACACTGAAGCTGGAGCTG	393	BI048312	lincRNA	+	228286740	227598421	noncoding	exon sense-overlapping	NM_001658	ARF1	ADP-ribosylation factor 1	+	228270360	228286913
ASHG19A3L0000086	37529.9	35865.3	32746.6	24092.1	23067.7	23686	23680.3	14.9457	14.9106	14.8396	14.7345	14.6842	14.6911	14.6256	P	P	P	P	P	P	P	chr1	lincRNA-WNT9A	CGAAAAAGACAACCTCTACTTTTTTCTTTAGTATTTGGATAAACACTGAAGCTGGAGCTG	393	BI048312	lincRNA	+	228286740	227598421	noncoding	intron sense-overlapping	NM_033131	WNT3A	protein Wnt-3a precursor	+	228194722	228248972
ASHG19A3L0000086	37529.9	35865.3	32746.6	24092.1	23067.7	23686	23680.3	14.9457	14.9106	14.8396	14.7345	14.6842	14.6911	14.6256	P	P	P	P	P	P	P	chr1	lincRNA-WNT9A	CGAAAAAGACAACCTCTACTTTTTTCTTTAGTATTTGGATAAACACTGAAGCTGGAGCTG	393	BI048312	lincRNA	+	228286740	227598421	noncoding	intron sense-overlapping	NM_183062	PRSS38	serine protease 38 precursor	+	228003417	228034171
ASHG19A3L0000086	37529.9	35865.3	32746.6	24092.1	23067.7	23686	23680.3	14.9457	14.9106	14.8396	14.7345	14.6842	14.6911	14.6256	P	P	P	P	P	P	P	chr1	lincRNA-WNT9A	CGAAAAAGACAACCTCTACTTTTTTCTTTAGTATTTGGATAAACACTGAAGCTGGAGCTG	393	BI048312	lincRNA	+	228286740	227598421	noncoding	intron sense-overlapping	NM_178549	ZNF678	zinc finger protein 678	+	227751219	227850164
ASHG19A3A043149	66.9471	59.4242	79.6477	140.23	56.7811	38.1954	56.8081	6.19537	6.03709	6.47716	7.03313	5.75882	5.14104	5.62875	P	P	P	P	P	P	P	chr10	RP11-429G19.2	TTATAATCGGAGTGGATTCCATACCTCTCATCCCTGGATTTTCATCTTGTGGCACTGGAT	716	ENST00000451364	Ensembl	-	97849912	97621069	noncoding	intronic antisense	NM_001001732	CC2D2B	protein CC2D2B isoform 2	+	97759847	97792441
ASHG19A3A043149	66.9471	59.4242	79.6477	140.23	56.7811	38.1954	56.8081	6.19537	6.03709	6.47716	7.03313	5.75882	5.14104	5.62875	P	P	P	P	P	P	P	chr10	RP11-429G19.2	TTATAATCGGAGTGGATTCCATACCTCTCATCCCTGGATTTTCATCTTGTGGCACTGGAT	716	ENST00000451364	Ensembl	-	97849912	97621069	noncoding	intronic antisense	NM_001134375	CCNJ	cyclin-J isoform 1	+	97803158	97820625
ASHG19A3A043149	66.9471	59.4242	79.6477	140.23	56.7811	38.1954	56.8081	6.19537	6.03709	6.47716	7.03313	5.75882	5.14104	5.62875	P	P	P	P	P	P	P	chr10	RP11-429G19.2	TTATAATCGGAGTGGATTCCATACCTCTCATCCCTGGATTTTCATCTTGTGGCACTGGAT	716	ENST00000451364	Ensembl	-	97849912	97621069	noncoding	natural antisense	NM_001164178	ENTPD1	ectonucleoside triphosphate diphosphohydrolase 1	+	97515408	97637023
ASHG19A3A043149	66.9471	59.4242	79.6477	140.23	56.7811	38.1954	56.8081	6.19537	6.03709	6.47716	7.03313	5.75882	5.14104	5.62875	P	P	P	P	P	P	P	chr10	RP11-429G19.2	TTATAATCGGAGTGGATTCCATACCTCTCATCCCTGGATTTTCATCTTGTGGCACTGGAT	716	ENST00000451364	Ensembl	-	97849912	97621069	noncoding	natural antisense	NM_001164183	ENTPD1	ectonucleoside triphosphate diphosphohydrolase 1	+	97515672	97637023
ASHG19A3A043149	66.9471	59.4242	79.6477	140.23	56.7811	38.1954	56.8081	6.19537	6.03709	6.47716	7.03313	5.75882	5.14104	5.62875	P	P	P	P	P	P	P	chr10	RP11-429G19.2	TTATAATCGGAGTGGATTCCATACCTCTCATCCCTGGATTTTCATCTTGTGGCACTGGAT	716	ENST00000451364	Ensembl	-	97849912	97621069	noncoding	natural antisense	NM_001098175	ENTPD1	ectonucleoside triphosphate diphosphohydrolase 1	+	97471535	97637023
ASHG19A3A043149	66.9471	59.4242	79.6477	140.23	56.7811	38.1954	56.8081	6.19537	6.03709	6.47716	7.03313	5.75882	5.14104	5.62875	P	P	P	P	P	P	P	chr10	RP11-429G19.2	TTATAATCGGAGTGGATTCCATACCTCTCATCCCTGGATTTTCATCTTGTGGCACTGGAT	716	ENST00000451364	Ensembl	-	97849912	97621069	noncoding	natural antisense	NM_001164181	ENTPD1	ectonucleoside triphosphate diphosphohydrolase 1	+	97515408	97637023
ASHG19A3A043149	66.9471	59.4242	79.6477	140.23	56.7811	38.1954	56.8081	6.19537	6.03709	6.47716	7.03313	5.75882	5.14104	5.62875	P	P	P	P	P	P	P	chr10	RP11-429G19.2	TTATAATCGGAGTGGATTCCATACCTCTCATCCCTGGATTTTCATCTTGTGGCACTGGAT	716	ENST00000451364	Ensembl	-	97849912	97621069	noncoding	intronic antisense	NM_001134376	CCNJ	cyclin-J isoform 3	+	97803158	97820625
ASHG19A3A043149	66.9471	59.4242	79.6477	140.23	56.7811	38.1954	56.8081	6.19537	6.03709	6.47716	7.03313	5.75882	5.14104	5.62875	P	P	P	P	P	P	P	chr10	RP11-429G19.2	TTATAATCGGAGTGGATTCCATACCTCTCATCCCTGGATTTTCATCTTGTGGCACTGGAT	716	ENST00000451364	Ensembl	-	97849912	97621069	noncoding	natural antisense	NM_001164179	ENTPD1	ectonucleoside triphosphate diphosphohydrolase 1	+	97515672	97637023
ASHG19A3A043149	66.9471	59.4242	79.6477	140.23	56.7811	38.1954	56.8081	6.19537	6.03709	6.47716	7.03313	5.75882	5.14104	5.62875	P	P	P	P	P	P	P	chr10	RP11-429G19.2	TTATAATCGGAGTGGATTCCATACCTCTCATCCCTGGATTTTCATCTTGTGGCACTGGAT	716	ENST00000451364	Ensembl	-	97849912	97621069	noncoding	intronic antisense	NM_001130446	C10orf131	hypothetical protein LOC100127889	+	97667721	97698415
ASHG19A3A043149	66.9471	59.4242	79.6477	140.23	56.7811	38.1954	56.8081	6.19537	6.03709	6.47716	7.03313	5.75882	5.14104	5.62875	P	P	P	P	P	P	P	chr10	RP11-429G19.2	TTATAATCGGAGTGGATTCCATACCTCTCATCCCTGGATTTTCATCTTGTGGCACTGGAT	716	ENST00000451364	Ensembl	-	97849912	97621069	noncoding	natural antisense	NM_001776	ENTPD1	ectonucleoside triphosphate diphosphohydrolase 1	+	97515672	97637023
ASHG19A3A043149	66.9471	59.4242	79.6477	140.23	56.7811	38.1954	56.8081	6.19537	6.03709	6.47716	7.03313	5.75882	5.14104	5.62875	P	P	P	P	P	P	P	chr10	RP11-429G19.2	TTATAATCGGAGTGGATTCCATACCTCTCATCCCTGGATTTTCATCTTGTGGCACTGGAT	716	ENST00000451364	Ensembl	-	97849912	97621069	noncoding	natural antisense	NM_001164182	ENTPD1	ectonucleoside triphosphate diphosphohydrolase 1	+	97515672	97637023
ASHG19A3A043149	66.9471	59.4242	79.6477	140.23	56.7811	38.1954	56.8081	6.19537	6.03709	6.47716	7.03313	5.75882	5.14104	5.62875	P	P	P	P	P	P	P	chr10	RP11-429G19.2	TTATAATCGGAGTGGATTCCATACCTCTCATCCCTGGATTTTCATCTTGTGGCACTGGAT	716	ENST00000451364	Ensembl	-	97849912	97621069	noncoding	intronic antisense	NM_019084	CCNJ	cyclin-J isoform 2	+	97803158	97820625
ASHG19A3A043149	66.9471	59.4242	79.6477	140.23	56.7811	38.1954	56.8081	6.19537	6.03709	6.47716	7.03313	5.75882	5.14104	5.62875	P	P	P	P	P	P	P	chr10	RP11-429G19.2	TTATAATCGGAGTGGATTCCATACCTCTCATCCCTGGATTTTCATCTTGTGGCACTGGAT	716	ENST00000451364	Ensembl	-	97849912	97621069	noncoding	intronic antisense	NM_001159747	CC2D2B	protein CC2D2B isoform 1	+	97759847	97792441
ASHG19A3A046486	111542	108607	104429	71057.4	75845.5	74687.9	71805.5	16.4792	16.4898	16.4989	16.369	16.3881	16.3531	16.2579	P	P	P	P	P	P	P	chr11	RPLP0P2	TTCCAGGCTTTAGGTATCATCACTAAAATCTCCAGGGGCGCCATTGAAATCCTGAGTGAT	961	ENST00000490750	Ensembl	+	61405112	61404151	noncoding	intergenic
ASHG19A3L0001912	59.2472	56.3831	59.4695	80.8176	84.8573	73.5182	95.1204	6.02067	5.96948	6.06709	6.22171	6.35624	6.12125	6.39416	P	P	P	P	P	P	P	chr7	lincRNA-GPR141-2	CACAGTGAAAGTCTAAATATCTTAGAGCTTTTCCTCTGCTACTACAGAATCTTCCTAGAA	11826	chr7:37833800-37845625-	lincRNA	-	37845625	37833800	noncoding	intergenic
ASHG19A3L0003191	25.6041	11.0517	21.2716	12.4214	23.6881	14.8777	31.2946	4.84972	3.88788	4.6495	3.34219	4.44117	3.69059	4.72478	A	P	P	P	P	P	A	chr2	lincRNA-SERPINE2-3	GAGTTCCAATGAGATTCCTTGGCCTTCATAAGTAACCAATATGGAAAAAGATAAAATGAG	5601	chr2:225083206-225088806-	lincRNA	-	225088806	225083206	noncoding	intergenic
ASHG19A3A013578	1544.27	1312.53	1507.27	1491.34	1855.53	1467.61	2045.52	10.4488	10.2341	10.4762	10.6419	10.9844	10.6221	11.0403	P	P	P	P	P	P	P	chr2	AC009236.1	AAACCAATCGTCCCCCCACCTGATTCCAAAGGAATTACAGAAAAATGGAAAGCCAGGAAC	721	ENST00000430650	Ensembl	-	45550434	45419317	noncoding	intergenic
ASHG19A3A032100	43.1144	34.1302	36.8708	55.5909	109.559	43.3436	118.261	5.57495	5.29831	5.4112	5.64903	6.73921	5.32981	6.72928	P	P	P	P	P	P	P	chr6	AK055166	TAAGTGGTGCTTGCTAGCCCTACTAAGAATCCTGCCATTGTTGCAAATTTCAGAAAAAAG	2069	uc003qet.1	UCSC_knowngene	+	134825719	134758853	noncoding	intergenic
ASHG19A3A034256	9.23159	5.23793	9.90054	29.3205	23.8653	31.7205	29.882	3.41071	2.33151	3.60478	4.68887	4.45192	4.8622	4.65303	A	A	A	P	P	P	P	chr1	RP4-799D16.1	AGCGTTCTCTAGAGCGGTGGATCCCAAATGCCATCTGAGGACCAGCAACAGCAGCAGCAT	490	ENST00000424084	Ensembl	-	25439610	25370197	noncoding	intergenic
ASHG19A3L0003160	21.6438	10.1608	17.4632	16.0668	9.47458	16.8016	24.6026	4.59788	3.79145	4.37496	3.75917	3.03689	3.88807	4.35575	A	P	A	P	A	P	P	chr13	lincRNA-ITM2B-2	TCATAATCCTAATGGGTCAGATCCTACCTTCTCAGACAAGGACAGACCCAGATACCCATA	447	BF943620	lincRNA	+	48739087	48738870	noncoding	intergenic
ASHG19A3A027682	126.037	124.739	113.834	84.4843	75.4971	79.9653	82.0335	7.07062	7.05319	6.96414	6.28869	6.18411	6.2383	6.17856	P	P	P	P	P	P	P	chr5	AC034199.2	TTCCTCATTTTACAGTAAGGGAAACACCCCTGGTACAAAGTAAATACTCAATGCTCATTA	2182	ENST00000511921	Ensembl	-	169739720	169735704	noncoding	intergenic
ASHG19A3A018664	160.715	169.246	151.657	59.6131	54.1919	44.2567	68.5204	7.40139	7.46448	7.35674	5.757	5.68893	5.36157	5.90968	P	P	P	P	P	P	P	chr21		GCCAAAGACATTACTTTGAGGCATGAAAATATCCTGTGTCTGTTTCTGCAATATATGTTT	2087	AK057475	misc_RNA	-	19303493	19301407	noncoding	intronic antisense	NM_001204177	CHODL	chondrolectin isoform d	+	19289656	19639687
ASHG19A3A018664	160.715	169.246	151.657	59.6131	54.1919	44.2567	68.5204	7.40139	7.46448	7.35674	5.757	5.68893	5.36157	5.90968	P	P	P	P	P	P	P	chr21		GCCAAAGACATTACTTTGAGGCATGAAAATATCCTGTGTCTGTTTCTGCAATATATGTTT	2087	AK057475	misc_RNA	-	19303493	19301407	noncoding	intronic antisense	NM_001204175	CHODL	chondrolectin isoform c	+	19289656	19639687
ASHG19A3A018664	160.715	169.246	151.657	59.6131	54.1919	44.2567	68.5204	7.40139	7.46448	7.35674	5.757	5.68893	5.36157	5.90968	P	P	P	P	P	P	P	chr21		GCCAAAGACATTACTTTGAGGCATGAAAATATCCTGTGTCTGTTTCTGCAATATATGTTT	2087	AK057475	misc_RNA	-	19303493	19301407	noncoding	intronic antisense	NM_001204178	CHODL	chondrolectin isoform d	+	19289656	19639687
ASHG19A3A018664	160.715	169.246	151.657	59.6131	54.1919	44.2567	68.5204	7.40139	7.46448	7.35674	5.757	5.68893	5.36157	5.90968	P	P	P	P	P	P	P	chr21		GCCAAAGACATTACTTTGAGGCATGAAAATATCCTGTGTCTGTTTCTGCAATATATGTTT	2087	AK057475	misc_RNA	-	19303493	19301407	noncoding	intronic antisense	NM_001204176	CHODL	chondrolectin isoform c	+	19289656	19639687
ASHG19A3L0000857	61.403	73.6006	61.0541	61.5111	82.0204	98.9532	115.602	6.06655	6.32953	6.10722	5.80482	6.31003	6.55546	6.69457	P	P	P	P	P	P	P	chr16	lincRNA-LITAF-2	TCAGCTCATTGCCTGCTTCATTGTCATTGGTGCCCAGAAGGCCAGCGGATATGCCGTGCT	489	AI201251	lincRNA	+	11478925	11477572	noncoding	intergenic
ASHG19A3A040291	627.288	761.977	614.627	516.375	531.256	548.473	519.747	9.23606	9.49391	9.24936	9.03905	9.13765	9.14521	8.9787	P	P	P	P	P	P	P	chrX	CTD-2230M5.1	AACTTACAGACTTCCACAAGCAAGTCACTAGTGCTGAGGAATGTAACCAAGTTTGCTGGG	168	ENST00000423016	Ensembl	-	113623608	113623440	noncoding	intergenic
ASHG19A3L0003153	19.778	23.7428	22.3885	39.1931	31.7974	20.0826	17.8427	4.47269	4.82199	4.7197	5.12649	4.88643	4.16857	3.84772	A	P	P	P	P	P	P	chr8	lincRNA-CDCA2	CCTTCTTCTAATCTCCAAGTTAAAAACCTCTAAACCTCTGACTTTTAGACATCAGATTTC	5378	chr8:25437747-25443124-	lincRNA	-	25443124	25437747	noncoding	intergenic
ASHG19A3L0000465	2048.58	1889.15	1907.95	614.39	572.396	577.189	638.355	10.859	10.7494	10.8146	9.29477	9.24151	9.22564	9.29793	P	P	P	P	P	P	P	chr12	lincRNA-ST8SIA1	ATAGCTGAGCATAGGAAATTAAAAAGCCTCTTTAAAGATCTGTACTGTCTTGAGGTTGAT	2345	CR623725	lincRNA	-	22589990	22477345	noncoding	intron sense-overlapping	NM_003034	ST8SIA1	alpha-N-acetylneuraminide	-	22346324	22487648
ASHG19A3L0000851	2843.71	2603.29	2636.54	1263.97	1211	1119.62	1281.59	11.3175	11.1969	11.2693	10.3968	10.3601	10.2302	10.359	P	P	P	P	P	P	P	chr15	lincRNA-MCTP2-2	CACAGTATTTCCCTGCCATGTAAAAATCCTGACTTTGTGCGTATATAAAATGTATGCAAT	4605	BC041387	lincRNA	+	95023632	94774954	noncoding	exon sense-overlapping	NM_018349	MCTP2	multiple C2 and transmembrane domain-containing	+	94841429	95027181
ASHG19A3L0000851	2843.71	2603.29	2636.54	1263.97	1211	1119.62	1281.59	11.3175	11.1969	11.2693	10.3968	10.3601	10.2302	10.359	P	P	P	P	P	P	P	chr15	lincRNA-MCTP2-2	CACAGTATTTCCCTGCCATGTAAAAATCCTGACTTTGTGCGTATATAAAATGTATGCAAT	4605	BC041387	lincRNA	+	95023632	94774954	noncoding	exon sense-overlapping	NM_001159643	MCTP2	multiple C2 and transmembrane domain-containing	+	94841429	95027181
ASHG19A3L0000851	2843.71	2603.29	2636.54	1263.97	1211	1119.62	1281.59	11.3175	11.1969	11.2693	10.3968	10.3601	10.2302	10.359	P	P	P	P	P	P	P	chr15	lincRNA-MCTP2-2	CACAGTATTTCCCTGCCATGTAAAAATCCTGACTTTGTGCGTATATAAAATGTATGCAAT	4605	BC041387	lincRNA	+	95023632	94774954	noncoding	exon sense-overlapping	NM_001159644	MCTP2	multiple C2 and transmembrane domain-containing	+	94899163	94946494
ASHG19A3L0001803	5	5.23226	5	19.4816	16.3958	20.7403	18.0648	2.37766	2.33129	2.39437	4.06102	3.88511	4.21716	3.86803	A	A	A	P	P	P	P	chr6	lincRNA-SUPT3H-2	TGTTTTGTAGACTCTGCTGGCTACAATCTAATAGAATGCTTAATCTGAATATTTCTGGTG	582	DA877320	lincRNA	+	44797742	44698872	noncoding	natural antisense	NM_003599	SUPT3H	transcription initiation protein SPT3 homolog	-	44797449	45345575
ASHG19A3L0001803	5	5.23226	5	19.4816	16.3958	20.7403	18.0648	2.37766	2.33129	2.39437	4.06102	3.88511	4.21716	3.86803	A	A	A	P	P	P	P	chr6	lincRNA-SUPT3H-2	TGTTTTGTAGACTCTGCTGGCTACAATCTAATAGAATGCTTAATCTGAATATTTCTGGTG	582	DA877320	lincRNA	+	44797742	44698872	noncoding	natural antisense	NM_181356	SUPT3H	transcription initiation protein SPT3 homolog	-	44796469	45345670
ASHG19A3L0003445	84.2759	56.8441	71.9431	75.0378	107.714	76.98	134.922	6.52051	5.97999	6.33004	6.1043	6.71296	6.18411	6.92645	P	P	P	P	P	P	P	chr10	lincRNA-TMEM20-2	AAGAATTTTGATATCTGAGCTGCTGGATGCATGCGCTTTCTTTCTCTCTCTGATTCCCCC	7667	chr10:95567958-95575624+	lincRNA	+	95575624	95567958	noncoding	intergenic
ASHG19A3A046134	115.008	118.11	118.252	92.3582	90.867	93.9079	82.3153	6.94638	6.97646	7.01543	6.42094	6.45669	6.47741	6.18271	P	P	P	P	P	P	P	chr11	CR598129	TTTCTACAACATAGCTATCACCAGGCCTGAATTCTTTTGGGCTCAGAATTTGTTCTAAGA	2708	uc001mhz.1	UCSC_knowngene	+	9832866	9779839	noncoding	natural antisense	NM_030962	SBF2	myotubularin-related protein 13	-	9800213	10315754
ASHG19A3L0001756	48.829	29.401	47.6583	45.6976	60.9889	48.9604	87.7979	5.75307	5.10046	5.76411	5.35817	5.86855	5.51194	6.27642	P	P	P	P	P	P	P	chr6	lincRNA-C6orf118-6	TTTGAAAGCCTAGTAGACACCCGATGCTTTCAACATGTCTTATATGACCCTTGCCTCCAG	592	DA204380	lincRNA	+	164650818	164347976	noncoding	intergenic
ASHG19A3A007192	302.258	309.143	303.048	91.9029	108.511	92.5979	124.271	8.25303	8.27497	8.29702	6.41339	6.72353	6.45624	6.80214	P	P	P	P	P	P	P	chr7	LOC401397	GCCATTCCTGTAATGGCTGCTTCCTAGAAGGTCGTGTCACGTGGAACCTCTTAATCTCAG	1055	NR_015442	RefSeq_NR	-	112758637	112756773	noncoding	intergenic
ASHG19A3A039070	37.6825	28.2766	40.1746	39.3834	40.4272	35.8236	45.2672	5.38499	5.04936	5.52775	5.13287	5.24586	5.0445	5.2852	P	P	P	P	P	P	P	chr9	AL591506.1	TGATGGTTATGTACCATCTCTTGACCATAAAAAGTCCTACTCTCTACATGCTGTATTATT	306	ENST00000364713	Ensembl	+	107859342	107859036	noncoding	intergenic
ASHG19A3L0003406	26.1943	18.0667	26.419	26.2417	34.7029	24.7305	48.3648	4.88307	4.48037	4.95201	4.52233	5.01814	4.48722	5.38411	A	P	P	P	P	P	P	chr18	lincRNA-TCF4-4	TTTTTCACAGAGCATCTTCCTGGACCAGTGTTCTTTGGGAAATCCTGGGTCTGATGACTT	350	AI420530	lincRNA	-	53763538	53560555	noncoding	intergenic
ASHG19A3L0001472	170.372	144.988	140.963	253.954	89.8529	251.585	125.526	7.48149	7.25723	7.25744	7.94036	6.43892	7.969	6.81596	P	P	P	P	P	M	M	chr4	lincRNA-TACC3	TGGTGCCATAAGTGCCCCCTGACAGTAGCCTGAGTTTCCCATGCTTTGAGATGGGGTGGT	12751	chr4:1774152-1786902-	lincRNA	-	1786902	1774152	noncoding	intergenic
ASHG19A3L0001051	25.3432	15.3704	12.8169	63.8194	16.8309	16.6251	21.9226	4.83379	4.27844	3.95337	5.85911	3.92304	3.87221	4.17456	A	P	A	P	P	P	P	chr2	lincRNA-TSN-1	TCCAATTCATTTCCTGCTTTACCTGGTTCTGGAAAATAGGCTCACCGAATATCTAACAAT	11526	chr2:122573205-122584730-	lincRNA	-	122584730	122573205	noncoding	intergenic
ASHG19A3A009938	83.7897	47.3011	78.847	182.492	68.7412	47.7619	68.1448	6.51423	5.73743	6.46047	7.44046	6.04767	5.47505	5.89934	P	P	P	P	P	P	P	chr17	MYO15B	ACATTCCTCCAACAGCTGTTGGCTGACCGTCTGCCTCATCTACCCTTGGGCCAGATGCTG	9424	NR_003587	RefSeq_NR	+	73622925	73584138	noncoding	intergenic
ASHG19A3A048455	5	5.43646	5	32.4938	23.968	20.0266	26.6869	2.37766	2.43889	2.39437	4.84224	4.45914	4.16306	4.4758	A	A	A	P	P	P	P	chr12	BC041929	GAGGTCGTATCAGTAGATAAACTGCGATCTCTGTGGAAATCTTTTTCCTTATTTTTAAAG	1355	uc001rhc.2	UCSC_knowngene	+	26334216	26287896	noncoding	intergenic
ASHG19A3L0003377	113.874	86.9244	112.326	191.03	118.893	125.069	205.905	6.93127	6.55653	6.94799	7.50677	6.86105	6.90791	7.571	P	P	P	P	P	P	P	chr5	lincRNA-ETF1	GGAACCCCAGGCCTCTGCTTGGGTAGGGCTTTTATTCTCTTCTGTGTGCAGGGTCCTTGA	7785	chr5:137822391-137830175+	lincRNA	+	137830175	137822391	noncoding	intergenic
ASHG19A3L0002606	71.3847	52.9121	65.8068	123.755	92.2491	99.2684	114.894	6.29156	5.88363	6.20395	6.85138	6.47945	6.55994	6.68477	P	P	P	P	P	P	P	chr12	lincRNA-NTF3-1	ATGTGGGGAATTACTTACCTCTTCTCTGGAAACCTTTCAACCTTTCTCTGGACTTCATCC	500	H00916	lincRNA	+	5454785	5454390	noncoding	intergenic
ASHG19A3L0000333	1421.31	1149.7	1346.86	907.086	1524.37	967.695	1647.68	10.3374	10.0524	10.3213	9.89938	10.7035	10.0041	10.7285	P	P	P	P	P	P	P	chr11	lincRNA-RPUSD4-2	CCCCACACTGGAAGTGGTTTGCACACTCCCTCCAACCAGACAAAAAAGAGAGGGTTTCCA	613	DB030353	lincRNA	+	125977385	125976772	noncoding	intergenic
ASHG19A3A041185	33.4527	14.2297	22.4328	25.2854	51.1187	23.5035	56.1873	5.22247	4.18537	4.72232	4.4617	5.59552	4.41088	5.61122	A	P	P	P	P	P	P	chrX	TSIX	TCAGCTCTCTGCACTGCTTGTAGGAAGTATAATGATTTGGCAGATAGGAACAATGAAGAG	37027	NR_003255	RefSeq_NR	+	73049066	73012039	noncoding	intergenic
ASHG19A3A013654	21852.9	22684	20743.1	17740.9	17532.5	17521.4	18543.2	14.1677	14.2562	14.1688	14.2997	14.289	14.2625	14.263	P	P	P	P	P	P	P	chr1		GTTTGGAGGAGTAGTTAGTATTTGGCTCATATAATGTGTTAGGTAACTATTCTAAGCCAT	1695	CR609715	misc_RNA	-	247352392	247350699	noncoding	intergenic
ASHG19A3L0002141	64.663	49.6201	65.6217	47.5332	81.6055	41.1066	96.6873	6.14428	5.79741	6.20095	5.41553	6.30174	5.24824	6.41874	P	P	P	P	P	P	P	chr8	lincRNA-MFHAS1-1	TCTCCTTTTGCCAGTCCCTGGATAAACCATTCATCAGATACATAGGAAGATAAATCAGAT	406	AW173332	lincRNA	+	8638945	8608883	noncoding	intergenic
ASHG19A3A013746	10.3717	5.30777	7.52399	22.7742	21.6975	27.6812	20.0856	3.57333	2.33424	3.24181	4.30094	4.31453	4.65639	4.03112	A	A	A	P	P	P	P	chr2		CTCCTGTCTCTGAAGAGAAGGAGGAAGTAAAAAGTTGAAAAACAACAGGAATGAAGTCAG	2546	AK125777	misc_RNA	-	65117134	65114588	noncoding	intergenic
ASHG19A3L0000362	153.745	121.709	174.073	83.8253	172.093	85.603	195.633	7.33848	7.01949	7.54245	6.27659	7.42157	6.3366	7.49276	P	P	P	P	P	P	P	chr11	lincRNA-KCNA4-3	CCAGTGACTTCCTGGCTCCATGATGTTGGCAAACGATTTAATTTTGTACATCCGTTTTTT	279	exon678+	lincRNA	+	29338225	29337947	noncoding
ASHG19A3A047166	30.3572	26.6851	36.8506	53.3931	60.5535	74.5894	78.8256	5.08447	4.97555	5.4105	5.59278	5.85878	6.13978	6.11992	A	P	P	P	P	P	P	chr11	BC112333	GGCTGAAAAATGTTTCTGTCCAGGCAAGGGTGTGTGCTGAATGACTCAAGGATTTTTTGG	1946	uc001qhs.2	UCSC_knowngene	+	134375017	134306628	noncoding	intergenic
ASHG19A3A049664	377.639	538.333	400.7	247.687	429.013	446.506	485.727	8.56093	9.01842	8.68224	7.90185	8.79566	8.83139	8.87753	P	P	P	P	P	P	P	chr13	RP11-30C8.2	TTGACAACTTGAGAACTGCGTTCAAGGAAAGTCTTTAACAATTCTCCTCCTCACCTCCAC	282	ENST00000443621	Ensembl	-	74120978	73987609	noncoding	intergenic
ASHG19A3A033216	120.359	92.37	97.837	367.864	214.363	315.425	243.855	7.01077	6.64689	6.75669	8.50852	7.75279	8.30847	7.83053	P	P	P	P	P	P	P	chr1	AF088076	TAAAAGGCCAAACCTTTGCTCCAACTTTCTCCTTAGCTTCCCTTTGGATCTGGAAAGCTG	423	uc001fuu.2	UCSC_knowngene	+	159946734	159931073	noncoding	intergenic
ASHG19A3A044583	177.38	170.52	149.268	108.437	107.918	118.874	117.749	7.53571	7.47558	7.33597	6.65264	6.7151	6.83174	6.72193	P	P	P	P	P	P	P	chr10	RP11-500G22.2	ATTTTGCAACCTTACCAGAAAGCACTTAGGAAAGTGATGATTCTGATGGAGAAATAAGAA	951	ENST00000437593	Ensembl	+	123711480	123687826	noncoding	bidirectional	NM_001001976	ATE1	arginyl-tRNA--protein transferase 1 isoform 1	-	123502624	123687546
ASHG19A3A044583	177.38	170.52	149.268	108.437	107.918	118.874	117.749	7.53571	7.47558	7.33597	6.65264	6.7151	6.83174	6.72193	P	P	P	P	P	P	P	chr10	RP11-500G22.2	ATTTTGCAACCTTACCAGAAAGCACTTAGGAAAGTGATGATTCTGATGGAGAAATAAGAA	951	ENST00000437593	Ensembl	+	123711480	123687826	noncoding	bidirectional	NM_007041	ATE1	arginyl-tRNA--protein transferase 1 isoform 2	-	123502624	123687546
ASHG19A3L0002286	63.4433	83.2197	84.8068	204	102.208	51.7026	80.002	6.11466	6.49604	6.56539	7.60518	6.63379	5.59336	6.14338	P	P	P	P	P	P	P	chrX	lincRNA-CNKSR2-2	GTAGTGGTCCTTCTAAATTCGGGCCACTCGACTCATTCCTTCCTGTCTCATTTTGTTCTT	12101	chrX:20419404-20431504+	lincRNA	+	20431504	20419404	noncoding	intergenic
ASHG19A3L0000717	770.145	737.456	697.599	416.279	462.257	457.31	479.701	9.50192	9.44768	9.42183	8.69693	8.91947	8.86727	8.85244	P	P	P	P	P	P	P	chr14	lincRNA-BAZ1A	CTTTATGGAGTAGAATTGAAAGGAGACTTTTCGCCAATTGCAGGAAATGGTCATAAAAAA	274	GD141660	lincRNA	-	35438502	35433120	noncoding	intergenic
ASHG19A3L0002991	127.348	106.784	127.218	189.476	128.65	140.589	193.335	7.08241	6.84112	7.11623	7.49567	6.98459	7.08176	7.47347	P	P	P	P	P	P	P	chr2	lincRNA-NT5C1B-RDH14-4	TTTGGCCTGTACAACCAGAGAACAGGATTCTTCCCTTCTTTTTGGCCACCAAATGCCTAT	585	DA335567	lincRNA	+	18542882	18059960	noncoding	exon sense-overlapping	NM_002252	KCNS3	potassium voltage-gated channel subfamily S	+	18059944	18114225
ASHG19A3L0002725	77.9489	63.2372	82.136	88.5036	106.045	93.2952	108.552	6.41803	6.12357	6.51957	6.35738	6.68852	6.467	6.59748	P	P	P	P	P	P	P	chr11	lincRNA-ZBTB44-1	GGTGTTTAACTGTAACCTGATTACCAGACTTGCATTCCTGTGGACCCATTTCCAGTAGCT	7903	chr11:130081529-130089431+	lincRNA	+	130089431	130081529	noncoding	intergenic
ASHG19A3A027677	61.1853	50.8528	54.2332	36.0589	44.4945	44.5011	46.3023	6.06155	5.83214	5.94062	5.0005	5.39005	5.37078	5.31918	P	P	P	P	P	P	P	chr5	AK055811	GAAAATAGTACAAACCCATCTGGCTGCAACAGTCCAGCAGCATGAAGATCAAAGTCACGT	858	uc003mak.1	UCSC_knowngene	-	169623637	169618650	noncoding	intergenic
ASHG19A3A028040	23.4678	18.4888	26.8246	14.1222	26.7787	22.898	31.1404	4.72032	4.50942	4.97317	3.55162	4.62521	4.37025	4.71577	A	P	P	P	P	P	A	chr5	AC106810.1	GTCTTTTTCCCTCATATGAGAGAAGGGATGAGGAAGTTCTCTAGGACCTCCTTTATAAAG	1145	ENST00000515097	Ensembl	+	25162815	25083406	noncoding	intergenic
ASHG19A3L0002155	198.476	165.685	195.52	316.376	334.948	265.801	377.378	7.69235	7.43677	7.70197	8.27676	8.42836	8.0475	8.48826	P	P	P	P	P	P	P	chr8	lincRNA-MMP16-2	TGATCATTGTTTGCTTATTCTTATATGGCCCCTGTATTTCAGACTCACTCTGTGTCAGGC	439	DB530028	lincRNA	-	90623953	90623514	noncoding	intergenic
ASHG19A3A049512	24.0893	19.1095	16.5192	49.1313	54.3775	56.9767	59.8279	4.76092	4.5503	4.30504	5.46713	5.69306	5.73843	5.70244	A	P	A	P	P	P	P	chr13	RP11-269C23.3	ATTATTCTCCTCTATAGAGCCTCAAAAGTCAAGTCAAGTAGCAAGCACACTGTGCTCCAG	858	ENST00000432701	Ensembl	-	44980002	44974486	noncoding	intergenic
ASHG19A3L0003507	658.243	676.247	633.177	299.958	281.089	290.906	325.411	9.29763	9.33133	9.29319	8.19519	8.17157	8.19061	8.26346	P	P	P	P	P	P	P	chr15	lincRNA-TMCO5A-2	AGGATGTGTTTTCATTTCCATAACACTGGAAGCACTTTCTGTAAACCTTTTGATGGACTT	807	CN273898	lincRNA	+	37401493	37400695	noncoding	intergenic
ASHG19A3A007449	768.861	770.346	736.719	539.782	628.661	658.065	668.436	9.49907	9.50815	9.49587	9.10523	9.38683	9.4204	9.36702	P	P	P	P	P	P	P	chr2	LOC100130691	CAAACTCCACGCCACCTGGTTTGCTCAACAGCAAAAGACACGGCCGGGTGCGGTGGCTCA	5223	NR_026966	RefSeq_NR	-	178257419	178148235	noncoding	bidirectional	NM_003659	AGPS	"alkyldihydroxyacetonephosphate synthase,"	+	178257470	178408564
ASHG19A3L0000088	155.399	177.976	163.242	120.593	186.289	313.444	192.975	7.35371	7.53436	7.45274	6.81079	7.54046	8.29809	7.47147	P	P	P	P	P	P	P	chr1	lincRNA-RAB4A-5	TCTATTGAGTGGGTGAGGTCTTGCCTCCCTTTCTCGTGCAACTCTTTTAGTGGTTTACAA	616	CB265955	lincRNA	+	228919347	228918736	noncoding	intergenic
ASHG19A3A048509	11.0563	14.6407	15.8544	41.6767	22.7707	35.4406	28.0313	3.6562	4.22188	4.25003	5.21602	4.38441	5.02723	4.55164	A	A	A	P	P	P	P	chr1	BC030750	ACCACGTGGATCCCAAGGCCATCCCAGGAACTCTTTGGAGGGGAGAAGCCCAGTGGAAAC	1327	uc001dqu.2	UCSC_knowngene	-	95285834	95123089	noncoding	bidirectional	NM_152369	SLC44A3	choline transporter-like protein 3 isoform 2	+	95286099	95360802
ASHG19A3A048509	11.0563	14.6407	15.8544	41.6767	22.7707	35.4406	28.0313	3.6562	4.22188	4.25003	5.21602	4.38441	5.02723	4.55164	A	A	A	P	P	P	P	chr1	BC030750	ACCACGTGGATCCCAAGGCCATCCCAGGAACTCTTTGGAGGGGAGAAGCCCAGTGGAAAC	1327	uc001dqu.2	UCSC_knowngene	-	95285834	95123089	noncoding	bidirectional	NM_001114106	SLC44A3	choline transporter-like protein 3 isoform 1	+	95285900	95360802
ASHG19A3L0001875	129.123	170.741	142.64	258.355	139.645	80.4439	135.878	7.10265	7.4781	7.27572	7.97043	7.10695	6.24654	6.94064	P	P	P	P	P	P	P	chr7	lincRNA-LOC100131199	TTATGTATCCAGGATCCTTCTACTGTGTTTCTCCTCCATTGCGAAGTCCTTCACTTCCAG	463	DB522844	lincRNA	-	141228978	141212709	noncoding	intergenic
ASHG19A3L0002830	32.0939	25.4985	28.2711	50.4011	36.5042	29.7833	33.586	5.16024	4.91116	5.04456	5.50927	5.09202	4.76781	4.83001	A	P	P	P	P	P	P	chr6	lincRNA-SEC63	TGAGACCTTGAAGAAAAGTCCTTCAGCTGCCCATAAAAAGTATAAATGGTAGAAACATAA	151	BF366503	lincRNA	-	108351491	108351340	noncoding	intergenic
ASHG19A3L0000901	24.6723	20.6997	33.3757	22.5727	36.6726	23.82	38.9545	4.79278	4.65024	5.26969	4.28739	5.09977	4.43368	5.05726	A	P	P	P	P	P	P	chr16	lincRNA-BANP-1	TTAATTAATTAATAAATGATCACCATGGCTGGCGGCTGCATGCTGGAGGGTACAGCTCTG	444	AI216374	lincRNA	-	88336888	88336446	noncoding	intergenic
ASHG19A3A052660	32.1735	31.3834	32.3438	43.3902	37.3826	44.9499	47.0109	5.16445	5.18836	5.22876	5.27752	5.13037	5.38668	5.34455	P	P	P	P	P	P	P	chr15		ATCTTGTGTGATCCTTGGAGATGGCAGGAAGCCCTGGACATACATGGTGTGGGGGCTCCT	574	AY421730	RNAdb	+	25328606	25322012	noncoding	intergenic
ASHG19A3L0002412	146.013	133.674	135.984	130.985	167.361	132.617	183.671	7.26656	7.14695	7.20747	6.93158	7.38089	6.99682	7.39321	P	P	P	P	P	P	P	chr8	lincRNA-PDP1-2	ATAAAGAAAATAAAAGGGACGGATTTCCTGTGTCTTCCCAAGCAGGCCCCGCCTTTTTCT	551	DB049930	lincRNA	-	95004321	95003771	noncoding	intergenic
ASHG19A3A025970	446.275	463.043	413.624	362.006	358.034	362.364	372.859	8.78709	8.82596	8.72174	8.48586	8.52061	8.5082	8.46484	P	P	P	P	P	P	P	chr4	RP11-33B1.1	TACATAACTGAAGACTCCCACCTTCAGGCAGGATTGGGTAGTACGTGTTTGTAACTACCT	979	ENST00000510011	Ensembl	+	120419058	120375974	noncoding	natural antisense	NM_001083	PDE5A	"cGMP-specific 3',5'-cyclic phosphodiesterase"	-	120415549	120549981
ASHG19A3A025970	446.275	463.043	413.624	362.006	358.034	362.364	372.859	8.78709	8.82596	8.72174	8.48586	8.52061	8.5082	8.46484	P	P	P	P	P	P	P	chr4	RP11-33B1.1	TACATAACTGAAGACTCCCACCTTCAGGCAGGATTGGGTAGTACGTGTTTGTAACTACCT	979	ENST00000510011	Ensembl	+	120419058	120375974	noncoding	natural antisense	NM_033430	PDE5A	"cGMP-specific 3',5'-cyclic phosphodiesterase"	-	120415549	120548442
ASHG19A3A025970	446.275	463.043	413.624	362.006	358.034	362.364	372.859	8.78709	8.82596	8.72174	8.48586	8.52061	8.5082	8.46484	P	P	P	P	P	P	P	chr4	RP11-33B1.1	TACATAACTGAAGACTCCCACCTTCAGGCAGGATTGGGTAGTACGTGTTTGTAACTACCT	979	ENST00000510011	Ensembl	+	120419058	120375974	noncoding	natural antisense	NM_033437	PDE5A	"cGMP-specific 3',5'-cyclic phosphodiesterase"	-	120415549	120549239
ASHG19A3A026510	15.5149	11.9353	14.8746	17.1618	29.2429	35.1063	33.3446	4.12343	3.9807	4.15979	3.86319	4.76408	5.01212	4.81954	A	A	A	P	P	P	P	chr5	RP11-480D4.2	CAAAAGTCTCTTCTGTCTAACAAATGGAGCTCCCTGATTCAACTGAGGACTGCAGTCAGA	440	ENST00000512406	Ensembl	-	8457677	8387750	noncoding	intergenic
ASHG19A3A050297	90.6363	49.3112	64.3822	908.195	940.9	908.398	988.143	6.61777	5.78778	6.17516	9.90068	9.99551	9.90306	9.96416	P	P	P	P	P	P	P	chr13	RP11-459P23.1	AGGTCTGTCCTTTTTAATGCTCACCACACTTGAGGTTTCTGTTCACACTTCAAAGGCTGT	3340	ENST00000419499	Ensembl	+	74834113	74805593	noncoding	intergenic
ASHG19A3A040889	62.7761	50.9233	59.8161	66.644	89.6241	100.874	113.267	6.10004	5.83454	6.07516	5.9224	6.43504	6.58347	6.66257	P	P	P	P	P	P	P	chrX	RP11-342D14.1	TTTCCACAGCTTCCTGCTTTCGTCAGCTTCAGCTTAACATCTATTATTGTGAAGAGTAGG	722	ENST00000450527	Ensembl	+	45193162	45042495	noncoding	intronic antisense	NM_176819	CXorf36	deleted in autism-1 related protein isoform 1	-	45007617	45060146
ASHG19A3A040889	62.7761	50.9233	59.8161	66.644	89.6241	100.874	113.267	6.10004	5.83454	6.07516	5.9224	6.43504	6.58347	6.66257	P	P	P	P	P	P	P	chrX	RP11-342D14.1	TTTCCACAGCTTCCTGCTTTCGTCAGCTTCAGCTTAACATCTATTATTGTGAAGAGTAGG	722	ENST00000450527	Ensembl	+	45193162	45042495	noncoding	intronic antisense	NM_024689	CXorf36	deleted in autism-1 related protein isoform 2	-	45021554	45060146
ASHG19A3A041849	17.3175	11.9036	19.2813	5.82359	26.6083	25.1699	27.9355	4.27422	3.97783	4.51885	2.46454	4.61572	4.51306	4.54673	A	P	P	P	P	P	A	chr1	RP5-865N13.2	TCAGGTTTACAGTTCCTCCAATTCTCAGATCGCAGAAGAAGCATCTGGAAGGAAATGACC	818	ENST00000428673	Ensembl	+	232321389	232295836	noncoding	intergenic
ASHG19A3A050025	76.3811	97.5945	86.5807	94.7862	103.69	110.394	111.942	6.38822	6.72116	6.59363	6.4582	6.65663	6.71631	6.64342	P	P	P	P	P	P	P	chr13	RP11-173P16.2	TTTGAAAAGTCATCTCAGGCCACATATCATACAAGCTGAACACTTCCAGCCCCTCTGATG	1082	ENST00000425638	Ensembl	+	31689836	31651390	noncoding	intergenic
ASHG19A3L0000009	259.384	267.272	197.582	350.51	129.45	238.48	181.607	8.04336	8.08108	7.7139	8.43784	6.99293	7.88245	7.37702	P	P	P	P	P	P	P	chr1	lincRNA-FAM102B-1	TCTGCTAGGGGATTAGTATAGCATTTTAACATTTGATCTTATTTTCTCCCTTCTGGATCA	451	BX104325	lincRNA	+	109074249	109073813	noncoding	intergenic
ASHG19A3L0002965	41.8669	41.2427	49.0682	92.3881	43.5834	46.8774	47.3429	5.53075	5.55164	5.80505	6.42124	5.35906	5.44848	5.35401	P	P	P	P	P	P	P	chr17	lincRNA-CCL2	TAGCGGGCATTTGTCTTGTGCATTTCCATTTCTGCCCCTACAAGACAATCTCCATGATCT	601	CA395304	lincRNA	+	32550922	32550321	noncoding	intergenic
ASHG19A3L0000470	463.454	500.313	403.646	497.212	457.317	309.759	423.096	8.83346	8.92646	8.69237	8.98163	8.90083	8.28303	8.65898	P	P	P	P	P	P	P	chr12	lincRNA-FKBP4	AGAGAGAAGCTCACAACAAGGCCACACAGAGAAGACAGCCAGGCCCTCCCTATGTCCTCT	422	U26161	lincRNA	+	2877919	2877503	noncoding	intergenic
ASHG19A3L0001303	24.2798	24.2723	33.678	88.9765	49.1469	26.7448	45.5336	4.77187	4.85021	5.28052	6.36631	5.53867	4.60472	5.29297	A	P	P	P	P	P	P	chr3	lincRNA-LSAMP-6	TCCATCTCTCTTGTTTTATGCTTTGTATTCATTACATGGTTTGGTCCTCTTTTCATCCCA	12426	chr3:118559485-118571910-	lincRNA	-	118571910	118559485	noncoding	intergenic
ASHG19A3A041270	124.137	112.398	129.816	78.5577	88.0543	69.5012	73.8282	7.05079	6.91187	7.14574	6.17683	6.40957	6.03914	6.01944	P	P	P	P	P	P	P	chrX	RP13-213K19.1	ATTACTATCCAGGAGTTGTTCAGGTGTATTTCAGAGCAGTTCACAGCCATGTTTAGGTGC	941	ENST00000420303	Ensembl	+	93574977	93574036	noncoding	intergenic
ASHG19A3L0000415	13.5888	14.4249	10.522	18.7593	17.4786	28.2124	23.8016	3.94103	4.20344	3.68929	4.00433	3.98425	4.68528	4.30331	A	A	A	P	P	P	P	chr11	lincRNA-PRSS23-3	AGTTGTCTATTTAAGGATTTCTTAGTGAGCTCCAAGGTAAAATATATCTACCTCGTGCCG	461	AW449673	lincRNA	+	86425129	86414139	noncoding	intergenic
ASHG19A3L0000385	127.946	101.141	133.623	105.229	192.99	134.569	226.148	7.08996	6.76904	7.18556	6.60907	7.59288	7.01561	7.71001	P	P	P	P	P	P	P	chr11	lincRNA-CD82-1	TGGCCAAGGGAGTGAGGTCCTTGTCCTGTCATCCTAGGCTCCAACGGCTTTCTTTGTCTG	229	AI239901	lincRNA	+	44559355	44559191	noncoding	intergenic
ASHG19A3L0003343	18.7916	28.4668	18.3919	20.704	23.091	35.0664	33.1567	4.39866	5.05884	4.44941	4.15342	4.4058	5.01014	4.8106	P	P	P	P	P	P	P	chr18	lincRNA-KIAA0802	TTTCAAATCTCTACTTCTGTTTCGACAGGTAATAATGTTGCCAGATGCCAGGGGTTCGGG	282	AI222143	lincRNA	+	8696122	8695853	noncoding	intergenic
ASHG19A3L0000499	47.5339	45.0036	38.1009	68.0259	39.174	14.5841	25.694	5.7125	5.66894	5.45733	5.95458	5.20015	3.6594	4.4196	P	P	P	P	P	P	P	chr12	lincRNA-SRSF2IP	TCATCACAGAACTTGTGTTTCCTCTCTGTAGGGCAAGAGTTGACTAGACAATACCCATAG	10876	chr12:46477908-46488783-	lincRNA	-	46488783	46477908	noncoding	intergenic
ASHG19A3A037458	488.87	461.801	476.376	49.7006	59.4909	59.6169	61.3493	8.89734	8.82209	8.90221	5.48658	5.83245	5.80279	5.73953	P	P	P	P	P	P	P	chr1	RP11-532L16.1	ATACCATCAAGAAGAAGCTGACAGGGATCCTGCATGAATTACCAGCAAATGGCTACAGGA	517	ENST00000425737	Ensembl	+	200298805	200298288	noncoding	intergenic
ASHG19A3L0002132	96.5701	92.0259	92.9365	24.2407	34.5079	32.2667	30.7208	6.71116	6.64112	6.68424	4.39713	5.00889	4.88664	4.69432	P	P	P	P	P	P	P	chr8	lincRNA-STMN2-2	TAACAGTATGAGTTCTGCAGTTATACAGAACTAAGTCCATTAGCTGTGTGACCCATGGCC	554	DA924741	lincRNA	+	79846051	79717450	noncoding	natural antisense	NM_001199887	IL7	interleukin-7 isoform 3 precursor	-	79645006	79717758
ASHG19A3L0002132	96.5701	92.0259	92.9365	24.2407	34.5079	32.2667	30.7208	6.71116	6.64112	6.68424	4.39713	5.00889	4.88664	4.69432	P	P	P	P	P	P	P	chr8	lincRNA-STMN2-2	TAACAGTATGAGTTCTGCAGTTATACAGAACTAAGTCCATTAGCTGTGTGACCCATGGCC	554	DA924741	lincRNA	+	79846051	79717450	noncoding	natural antisense	NM_000880	IL7	interleukin-7 isoform 1 precursor	-	79645006	79717758
ASHG19A3L0002132	96.5701	92.0259	92.9365	24.2407	34.5079	32.2667	30.7208	6.71116	6.64112	6.68424	4.39713	5.00889	4.88664	4.69432	P	P	P	P	P	P	P	chr8	lincRNA-STMN2-2	TAACAGTATGAGTTCTGCAGTTATACAGAACTAAGTCCATTAGCTGTGTGACCCATGGCC	554	DA924741	lincRNA	+	79846051	79717450	noncoding	natural antisense	NM_001199888	IL7	interleukin-7 isoform 4 precursor	-	79645006	79717758
ASHG19A3L0002132	96.5701	92.0259	92.9365	24.2407	34.5079	32.2667	30.7208	6.71116	6.64112	6.68424	4.39713	5.00889	4.88664	4.69432	P	P	P	P	P	P	P	chr8	lincRNA-STMN2-2	TAACAGTATGAGTTCTGCAGTTATACAGAACTAAGTCCATTAGCTGTGTGACCCATGGCC	554	DA924741	lincRNA	+	79846051	79717450	noncoding	natural antisense	NM_001199886	IL7	interleukin-7 isoform 2 precursor	-	79645006	79717758
ASHG19A3L0002516	97.9445	89.4472	82.7766	181.379	167.26	179.96	196.789	6.72928	6.59818	6.53054	7.43249	7.37936	7.45693	7.50053	P	P	P	P	P	P	P	chr1	lincRNA-TSTD1	GGTTACAAAACCCATCTGTATATCCATTCACGTTGTTTTAATTACTAAGAATTTATTTCA	83	CA941849	lincRNA	+	160998182	160998099	noncoding	intergenic
ASHG19A3A013257	59.3626	41.519	34.8254	32.8096	44.7725	28.7398	58.7235	6.02307	5.55971	5.3273	4.85658	5.40058	4.71392	5.67615	P	P	P	P	P	P	P	chr2	AC007463.2	GCTGATCACGTCACTCTACAGCTGTTCTGCCACATTTGAGCACCCACATTAAAGACAAAA	734	ENST00000416534	Ensembl	-	8039786	8026900	noncoding	intergenic
ASHG19A3L0002224	189.634	163.456	141.679	79.0133	28.1857	52.988	36.496	7.63206	7.41962	7.26535	6.18613	4.70831	5.63176	4.96235	P	P	P	P	P	P	P	chr9	lincRNA-INSL6	CTTTTTATCCTTATACTCAGGTAGTGACTGCATTTCCCAACTGGTTACTGCTTCCTTCCA	449	AI553950	lincRNA	+	5164252	5131978	noncoding	natural antisense	NM_007179	INSL6	insulin-like peptide INSL6 precursor	-	5163862	5185618
ASHG19A3L0002307	97.4447	107.972	77.4435	99.4673	38.62	36.6594	46.1797	6.72328	6.85527	6.43268	6.526	5.17892	5.08067	5.31427	P	P	P	P	P	P	P	chrX	lincRNA-ZNF673-5	GCTGGCATCTCTGGACCTATAAGAGTTTGAGAAGGCAGTATGCTTTAAAAGAAACTTATA	24926	chrX:45555906-45580831+	lincRNA	+	45580831	45555906	noncoding	intergenic
ASHG19A3A024430	42.0281	48.1127	32.8946	59.7142	31.548	23.2136	37.8064	5.53704	5.75815	5.25041	5.75934	4.87456	4.38996	5.01291	P	P	P	P	P	P	P	chr4	RP11-576N17.4	ACATCTGGAGAGTCAGTATTTTCTTGCTCCCCAAAGAATGTGAGCAAAACAAAGAAACAT	629	ENST00000513707	Ensembl	-	84299230	84298526	noncoding	intergenic
ASHG19A3A030884	10.9608	24.9085	20.4844	34.591	17.5825	25.4726	22.8046	3.64434	4.88348	4.60041	4.93821	3.99471	4.53072	4.23391	A	A	P	P	P	P	P	chr6	AJ420566	ATAAATAAAGGGTGGACTGACCTTGTCAACTGTTAAATTGGAGCCGTGGTGCGTTGCCTA	566	uc003mtu.1	UCSC_knowngene	+	2481403	2399099	noncoding	intergenic
ASHG19A3L0002616	64.3598	57.8304	48.0152	108.315	98.0959	122.613	93.9621	6.13574	6.00196	5.77527	6.6512	6.57046	6.87851	6.37544	P	P	P	P	P	P	P	chr19	lincRNA-ZNF507	AGTTGCAGATTATCTTTGAAAAACAACAGGCTCTGGCCCTGCCAGCCCTAGTAACTTCTA	480	AW293169	lincRNA	+	31844530	31844049	noncoding	intergenic
ASHG19A3L0000287	61.6431	55.496	64.906	58.9844	24.3995	49.0968	52.2971	6.07242	5.94647	6.18673	5.74092	4.48641	5.51693	5.50433	P	P	P	P	P	P	P	chr10	lincRNA-NRG3-1	AATTTTGGTTGTGCTAGTAACTCACAGCGGGACTTTGGGACTTGGTTCTTTTTCTCAGCC	308	BX119188	lincRNA	+	82423002	82422704	noncoding	intergenic
ASHG19A3L0002513	17.6131	9.06467	13.5716	18.5339	27.6786	26.4889	26.9978	4.30198	3.66399	4.02798	3.98586	4.67917	4.59001	4.49241	A	A	A	P	P	P	P	chr22	lincRNA-CRYBA4-2	ACAGTTGGAATGAGGGTGCACATTCAGAAAATGTCCTACACCGTCTTCTTCAGTGTGTGA	226	BF958740	lincRNA	-	27499433	27499205	noncoding	intergenic
ASHG19A3L0000547	46.3637	37.7672	40.8317	34.7218	66.1573	51.1023	79.6727	5.67842	5.43522	5.5519	4.94411	5.98869	5.57451	6.13652	P	P	P	P	P	P	P	chr12	lincRNA-BTG1-3	TCAAAGAGAGCCCCAAACAGTGTGATCAAGTGGAAGTAACAGTGCCTGGTCAACATTATA	457	BF002418	lincRNA	+	92501664	92500888	noncoding	intergenic
ASHG19A3A023735	33.9147	25.095	31.2887	86.1832	36.4515	21.099	37.935	5.24269	4.89283	5.18271	6.31722	5.08962	4.24254	5.01847	A	P	P	P	P	P	P	chr3	RP11-513G11.2	TTTCAAACCTTTGATCCATTGATCCATTGGGCAGTCTGGGCTTGCTTGGTTCTTGGTTCA	1771	ENST00000440556	Ensembl	+	194005157	193994470	noncoding	intergenic
ASHG19A3A046449	36.5284	35.4812	38.1977	51.2292	38.0159	36.4457	59.018	5.34387	5.35366	5.46041	5.53539	5.15519	5.07129	5.68381	P	P	P	P	P	P	P	chr11		TACTAAATACTTCGTCTCATTAGTTTCTGCCCGCCTAAGAGACAAGGAGAACAGCCGTCT	2212	BC026095	misc_RNA	+	59325212	59323030	noncoding	intergenic
ASHG19A3A049691	39.673	38.1577	38.926	14.5448	11.7827	15.7138	19.1874	5.45505	5.449	5.48781	3.59957	3.34557	3.77774	3.95738	P	P	P	P	A	P	P	chr13		TTACTAGAACTGATTTTGGGGGACTTTATCCACTCTTACTTGGAACACTAACTGTTGGCT	2136	AK021576	NRED	-	79924372	79890367	noncoding	intron sense-overlapping	NM_022118	RBM26	RNA-binding protein 26	-	79894099	79979923
ASHG19A3A043677	142.133	137.198	120.306	171.491	234.305	151.995	268.129	7.23441	7.18211	7.03985	7.34237	7.88819	7.20018	7.97222	P	P	P	P	P	P	P	chr10		AGCCCCCACACACTCAGTGCTGTCATAAATAATAGTTATCCTTATGGAAAAACTAACACA	1839	AK055754	misc_RNA	+	20060458	20058620	noncoding	intergenic
ASHG19A3A040770	86.1213	69.1923	88.6643	78.7618	150.08	77.7882	168.42	6.5492	6.24555	6.62399	6.18116	7.21247	6.19876	7.25977	P	P	P	P	P	P	P	chr1	AK124056	TGAAGAGCCTTTCTGCAGTTCTGCATTGAACTCTTCATGTGGCCCCATCTAGTAATGAGT	1530	uc001hpe.1	UCSC_knowngene	+	225939945	225888305	noncoding	intergenic
ASHG19A3L0000781	17.8239	12.2953	16.7581	24.7452	25.4705	26.1124	32.359	4.32046	4.01255	4.32457	4.42972	4.54885	4.56823	4.77711	A	P	A	P	P	P	P	chr14	lincRNA-SEL1L-1	ATGGGGATGATGGGCTATCTATTCTCTCTGGCATGTAGGATCAAAGCTATGCATTTACCA	18726	chr14:84962047-84980772-	lincRNA	-	84980772	84962047	noncoding	intergenic
ASHG19A3L0002098	37.5526	49.0667	47.8727	63.5052	67.7457	92.8771	107.516	5.38042	5.78138	5.7718	5.85303	6.02527	6.46029	6.5848	P	P	P	P	P	P	P	chr8	lincRNA-XKR4	AAATGCAGCTTGTTTCATGCCTTTCTCTGATTTATTCACCATCCGCGGTGTTGGTTGGGA	677	BX106988	lincRNA	+	55754324	55709128	noncoding	intergenic
ASHG19A3L0003007	17.7246	27.2902	24.1625	40.2955	25.5293	23.7499	22.8996	4.31224	5.00429	4.82062	5.16522	4.55242	4.42749	4.24101	A	A	P	P	P	P	P	chr2	lincRNA-NDUFS1	AGATTCTCAATTCTCCTGGTTTAGAGTGTCCAAGGTGCCTGGCACAATTCTGTGCACTAT	469	W19080	lincRNA	+	206954291	206953838	noncoding	intergenic
ASHG19A3A014789	35.0106	27.1286	19.8582	54.3338	43.321	51.0606	75.1183	5.28783	4.99625	4.55877	5.61862	5.34797	5.57333	6.04729	A	P	P	P	P	P	P	chr2	AC092638.2	AGAAGGTGGCAGACAAAGAGGTGGAGAAGGCATATAGGCAGAAGGCCTCCTCCTGCTACC	885	ENST00000425911	Ensembl	-	194142336	194141387	noncoding	intergenic
ASHG19A3A049176	180.647	163.275	159.946	297.109	239.148	220.853	225.42	7.55901	7.41748	7.42452	8.17993	7.92124	7.76742	7.7035	P	P	P	P	P	P	P	chr12		AATGCTGCTATCATTTTCAATTGCTCTCCCAATAAAACAGGCCCTGGAGCCGAGGTGAAT	2851	BC033539	misc_RNA	+	124573135	124570307	noncoding	intron sense-overlapping	NM_001204299	ZNF664-FAM101A	hypothetical protein LOC100533183	+	124457761	124800570
ASHG19A3L0001785	29.4529	16.6521	26.6978	41.7545	45.2365	46.7705	41.558	5.04346	4.37899	4.96539	5.21931	5.4186	5.44496	5.15853	A	P	P	P	P	P	P	chr6	lincRNA-IRF4	CAGAGACTGAATTCAGTGAGCAGAGAAAACAGCCTAGCCCATGGATTTGTTCTCAATGCA	529	DA148762	lincRNA	+	381891	381362	noncoding	intergenic
ASHG19A3A030483	48.7186	39.6535	38.6405	56.7305	44.0182	52.1683	52.848	5.74868	5.49837	5.47615	5.6792	5.3732	5.60545	5.52034	P	P	P	P	P	P	P	chr6	BC036196	GTTGTTCAGCTGTATGCTATCTGTCTATTCTTTGTTTTCTGTGTCAATAATGCCATATTG	2629	uc003qac.2	UCSC_knowngene	-	126070336	126039387	noncoding	bidirectional	NM_012259	HEY2	hairy/enhancer-of-split related with YRPW motif	+	126070731	126082415
ASHG19A3A021889	175.792	140.065	150.437	132.421	197.727	146.249	215.21	7.52158	7.21229	7.34633	6.94781	7.63071	7.14257	7.63416	P	P	P	P	P	P	P	chr3	RP11-12N13.4	AGCCACCTCCCGATATTGACACTTTGTTGATGTAGCATGACTATTCTTATACGTCTCTGT	766	ENST00000468910	Ensembl	-	165879756	165878990	noncoding	intergenic
ASHG19A3A027249	1299.42	1326.48	1047.85	378.546	402.794	382.944	436.586	10.2184	10.2457	9.97285	8.55018	8.694	8.59293	8.70819	P	P	P	P	P	M	M	chr5	CTC-428G20.3	ATTTTCATCTTGTCATTTAAGTTTCAGCAATTGAGTACCACACTAGAACACCCACAAATG	2231	ENST00000507241	Ensembl	-	114541943	114539712	noncoding	intergenic
ASHG19A3A016890	327.165	322.621	302.238	2786.56	2590.42	2611.78	2712.91	8.36307	8.33693	8.29272	11.5511	11.479	11.4635	11.4474	P	P	P	P	P	P	P	chr2	AC079767.4	TGATTTGGAGGCGTGTTCTCATTCAAAACCTTGCAAAATATAATTTCTTCTTGTCTGGGA	492	ENST00000429730	Ensembl	+	208531748	208527098	noncoding	intergenic
ASHG19A3L0002340	25.7041	14.4396	14.6997	25.7152	26.1826	19.1215	32.6163	4.85593	4.20548	4.1379	4.49098	4.59049	4.09269	4.78935	A	P	A	P	P	P	P	chr8	lincRNA-FAM150A	GTGACTCTGAACCAGTAGAAAATAGCCTTAGATACTCCTGTTTTTGTACATCAAACTTAA	21782	chr8:53507546-53529327-	lincRNA	-	53529327	53507546	noncoding	intergenic
ASHG19A3A051064	83.296	77.6031	83.7663	62.0503	43.6782	46.1218	45.1329	6.50573	6.40239	6.54857	5.81772	5.36188	5.42582	5.28146	P	P	P	P	P	P	P	chr14		AATCAGTGACTGCAACCCATGCTTGTTGGCAGGTTCTTATACAACCCACTATGAGTTAGC	3037	AK095250	misc_RNA	-	92226142	92223102	noncoding	intergenic
ASHG19A3A022111	129.279	129.865	120.786	95.5338	153.919	175.869	171.602	7.10413	7.1078	7.04649	6.46928	7.25233	7.41938	7.2901	P	P	P	P	P	P	P	chr3	LOC100131551	AGATTTCCCATCTCAGCCAATGGCGAGTCCAAAAATCCTTTGTGTCCCCTTTGATTCTTA	3021	NR_024480	RefSeq_NR	-	194030593	194018990	noncoding	intergenic
ASHG19A3L0003294	90.5918	95.2616	94.5161	83.8075	134.257	155.427	155.824	6.6167	6.68755	6.70818	6.27617	7.04538	7.23607	7.14794	P	P	P	P	P	P	P	chr3	lincRNA-SEMA5B-1	TTTCCAGGAGTGAGATTGGCCCTTCTTCATTTTTTCAGTTCCTCAACTTCCCAGGATAGG	13338	chr3:122764889-122778226-	lincRNA	-	122778226	122764889	noncoding	intergenic
ASHG19A3L0001309	25.5798	17.6848	14.7872	31.1728	12.1812	20.383	18.9838	4.84824	4.45402	4.15018	4.7819	3.40182	4.18943	3.94143	A	P	A	P	A	P	P	chr3	lincRNA-H1FX	ATAAAAATCCGGGGCTAGATTCCTTTCCAGATAACGAGGTTGAGAGTGTGAACTGAGTGC	559	DA508870	lincRNA	-	129088420	129087861	noncoding	intergenic
ASHG19A3L0000909	1653.99	1554.77	1440.37	9568.86	11640.2	11774.1	12205.4	10.5424	10.4626	10.4107	13.3825	13.7034	13.6796	13.6581	P	P	P	P	P	P	P	chr17	lincRNA-CDRT4	TTTGTGTCCATGGAACGTTTATAGACATGGAGGCAGGCAATAAATTCCTCCAATAATTAA	2838	AB074181	lincRNA	-	15466875	15339337	noncoding	exon sense-overlapping	NM_145301	FAM18B2	hypothetical protein LOC201158 isoform 1	-	15405577	15466945
ASHG19A3L0000909	1653.99	1554.77	1440.37	9568.86	11640.2	11774.1	12205.4	10.5424	10.4626	10.4107	13.3825	13.7034	13.6796	13.6581	P	P	P	P	P	P	P	chr17	lincRNA-CDRT4	TTTGTGTCCATGGAACGTTTATAGACATGGAGGCAGGCAATAAATTCCTCCAATAATTAA	2838	AB074181	lincRNA	-	15466875	15339337	noncoding	exon sense-overlapping	NM_001135036	FAM18B2	hypothetical protein LOC201158 isoform 2	-	15440293	15466945
ASHG19A3L0000909	1653.99	1554.77	1440.37	9568.86	11640.2	11774.1	12205.4	10.5424	10.4626	10.4107	13.3825	13.7034	13.6796	13.6581	P	P	P	P	P	P	P	chr17	lincRNA-CDRT4	TTTGTGTCCATGGAACGTTTATAGACATGGAGGCAGGCAATAAATTCCTCCAATAATTAA	2838	AB074181	lincRNA	-	15466875	15339337	noncoding	exon sense-overlapping	NM_001204477	CDRT4	CMT1A duplicated region transcript 4 protein	-	15339331	15370925
ASHG19A3L0000909	1653.99	1554.77	1440.37	9568.86	11640.2	11774.1	12205.4	10.5424	10.4626	10.4107	13.3825	13.7034	13.6796	13.6581	P	P	P	P	P	P	P	chr17	lincRNA-CDRT4	TTTGTGTCCATGGAACGTTTATAGACATGGAGGCAGGCAATAAATTCCTCCAATAATTAA	2838	AB074181	lincRNA	-	15466875	15339337	noncoding	exon sense-overlapping	NM_001204478	FAM18B2-CDRT4	hypothetical protein LOC100533496	-	15339331	15466945
ASHG19A3L0003172	27.5863	26.9671	22.8131	58.7855	25.7176	13.1609	27.0388	4.95159	4.98888	4.74101	5.73571	4.56342	3.4869	4.49387	A	P	P	P	P	A	P	chr2	lincRNA-FAM124B-2	GCTGCCCAAATCTAACCCTTCTTGTCAGTATTGCCACATCTTGTGATTTGTCAAGACAAG	6119	chr2:224986097-224992215+	lincRNA	+	224992215	224986097	noncoding	intergenic
ASHG19A3A026000	385.714	355.008	334.04	122.946	166.92	155.912	178.769	8.58768	8.46713	8.43255	6.84128	7.37605	7.24199	7.35347	P	P	P	P	P	P	P	chr4	RP11-662G20.1	TGGATTGCTTCATGTGTGCTATGCTCCAGCATTTGAAACAGTTGAAGAAACTAGAAAAAA	489	ENST00000429329	Ensembl	+	127885745	127484663	noncoding	intergenic
ASHG19A3A032178	1574.02	1429.4	1547.01	1699.39	3049.6	1724.37	3049.11	10.475	10.3469	10.5129	10.8305	11.7131	10.8492	11.6292	P	P	P	P	P	P	P	chr6	RP3-337D23.3	TAACAGTGCTGGACCTAAAAAAGGTGTTGGCCCACGAGTGCCTCTCTCTCCCTGCCTGAG	453	ENST00000359838	Ensembl	+	147502128	147480060	noncoding	intergenic
ASHG19A3A041069	659.398	567.353	662.444	656.777	880.777	673.424	992.498	9.30077	9.08909	9.35261	9.3978	9.89284	9.45515	9.9712	P	P	P	P	P	P	P	chrX	RP13-188A5.1	TACACTCTTCTGCCTTCCCTTGAGATAATTAAAATAGACTGTACACCGGCCCTAGTCGGT	1007	ENST00000452532	Ensembl	+	56041606	55934555	noncoding	intergenic
ASHG19A3A021214	156.541	137.896	149.822	115.79	102.191	121.128	117.175	7.36322	7.19097	7.34123	6.7433	6.63338	6.86043	6.71493	P	P	P	P	P	P	P	chr3	RP11-129K20.1	TTTGTCCTCATCAAGAAGGATGCAGATGAAGCTTCCATGAACAAGGTAGAGCTAGGGTCT	1338	ENST00000483942	Ensembl	-	63083387	63082049	noncoding	intergenic
ASHG19A3A027088	88.8301	78.7269	79.4114	53.7302	46.0949	55.8514	54.787	6.59042	6.42318	6.47175	5.60197	5.44522	5.70781	5.57346	P	P	P	P	P	P	P	chr5	LOC645323	GAAAGCACTCAATGAAGTCAAATTACTGAAGCTTTTGCCTACATCTTGGTCTTTTATGTA	3406	uc003kjh.3	UCSC_knowngene	-	87980620	87960263	noncoding	intergenic
ASHG19A3A034625	540.152	614.038	544.656	569.345	602.507	682.468	641.651	9.02654	9.20158	9.08077	9.18485	9.32035	9.47707	9.30549	P	P	P	P	P	P	P	chr7	AC004945.2	AAATTTTATGCCAGATAAAATATTCACCTTCTCGGACTCCCTGGCACCAGGCATGGCCAT	738	ENST00000426835	Ensembl	+	79100516	79082426	noncoding	natural antisense	NM_012301	MAGI2	"membrane-associated guanylate kinase, WW and PDZ"	-	77646373	79082890
ASHG19A3L0002404	26.9429	30.0029	21.5983	26.6075	105.201	114.908	150.387	4.92023	5.12658	4.66799	4.5429	6.67604	6.77704	7.09472	P	P	P	M	M	M	M	chr1	lincRNA-ELTD1-1	GGTGCCATACTTTTATCACCCACAAATAACCCCACAAACTTGGTATAATTGTATAAATTG	7724	chr1:82115673-82123396-	lincRNA	-	82123396	82115673	noncoding	intergenic
ASHG19A3L0002303	13.4008	6.35745	18.3092	13.2779	50.1045	21.2792	55.6773	3.92071	3.29158	4.44184	3.45072	5.56947	4.25526	5.59736	A	A	P	P	P	P	A	chrX	lincRNA-MAOA-3	CAGGTTCTGCTTCAAGTTGCTTCTGTAAAGCTAATTATGTAGAAATGGCATATGCATTTA	555	AA781357	lincRNA	+	43224080	43223535	noncoding	intergenic
ASHG19A3L0001045	303.391	242.279	301.054	280.742	487.708	297.212	545.707	8.25748	7.95071	8.28719	8.09373	9.0035	8.22269	9.05653	P	P	P	P	P	P	P	chr2	lincRNA-INHBB-4	GATTGGTGGCTGTGCTGAGTGACCTGTACACCCTCTCATTGCCTCTCTCCAACAACCCCA	451	exon2234-	lincRNA	-	121153946	121153496	noncoding
ASHG19A3L0000157	50.8803	41.5677	44.7525	69.7075	63.0184	38.399	90.4828	5.80658	5.56099	5.67976	5.99372	5.92031	5.14915	6.32013	P	P	P	P	P	P	P	chr1	lincRNA-SSBP3	GACAAACAAGACCAAATATTGTCCTCTTTCCACAGAAAATAAGGCTCCACCAGGGCCTGA	32169	chr1:54928212-54960380-	lincRNA	-	54960380	54928212	noncoding	intergenic
ASHG19A3L0002625	35.3615	30.8151	34.8992	39.0963	66.7797	66.6087	64.619	5.30216	5.16183	5.33118	5.12257	6.00427	5.97632	5.82124	P	P	P	P	P	P	P	chr15	lincRNA-MCTP2-1	AAGCAAACAAACACCAACCCAGCTCTTCATGTATTGGTATTAACATAGATATAATAGCGG	745	BG428088	lincRNA	-	96794277	96793549	noncoding	intergenic
ASHG19A3L0000155	59.1585	56.2753	57.1681	216.722	25.8819	56.5548	38.7034	6.01872	5.96713	6.01495	7.69203	4.57429	5.72862	5.04717	P	P	P	P	P	P	P	chr1	lincRNA-CDCP2	TATACTCACAGATGGCCTTGCCGCCCATGCCACAAACAATATAAGCATCTCATAGCAGCT	176	exon98+	lincRNA	+	54584068	54583893	noncoding
ASHG19A3L0000423	303.423	328.163	238.969	186.501	137.588	102.107	131.493	8.25828	8.3612	7.9621	7.47029	7.08189	6.60214	6.88527	P	P	P	P	P	P	P	chr11	lincRNA-AMOTL1-1	CTGGTAGCCCCCTCAATTCCTTGTGGAAAAGATAAAAGATAAAAAACAAGCAAGCAAGAT	457	AW892975	lincRNA	-	94628135	94627686	noncoding	intergenic
ASHG19A3L0000605	20.4736	11.8882	12.1023	46.7474	42.9423	36.8541	41.2774	4.52352	3.97632	3.87178	5.39166	5.33532	5.08918	5.14829	A	P	A	P	P	P	P	chr13	lincRNA-LNX2	AAAGCCAAGATGCCAAAATAAGGGGAACCAAAATGGTTTGTTGTGCAGCCAATGGGTTTT	601	AW361687	lincRNA	+	28423867	28003341	noncoding	intronic antisense	NM_001166263	MTIF3	"translation initiation factor IF-3,"	-	28009775	28024739
ASHG19A3L0000605	20.4736	11.8882	12.1023	46.7474	42.9423	36.8541	41.2774	4.52352	3.97632	3.87178	5.39166	5.33532	5.08918	5.14829	A	P	A	P	P	P	P	chr13	lincRNA-LNX2	AAAGCCAAGATGCCAAAATAAGGGGAACCAAAATGGTTTGTTGTGCAGCCAATGGGTTTT	601	AW361687	lincRNA	+	28423867	28003341	noncoding	intron sense-overlapping	NM_001206559	POLR1D	DNA-directed RNA polymerases I and III subunit	+	28194879	28241559
ASHG19A3L0000605	20.4736	11.8882	12.1023	46.7474	42.9423	36.8541	41.2774	4.52352	3.97632	3.87178	5.39166	5.33532	5.08918	5.14829	A	P	A	P	P	P	P	chr13	lincRNA-LNX2	AAAGCCAAGATGCCAAAATAAGGGGAACCAAAATGGTTTGTTGTGCAGCCAATGGGTTTT	601	AW361687	lincRNA	+	28423867	28003341	noncoding	intronic antisense	NM_001166261	MTIF3	"translation initiation factor IF-3,"	-	28009775	28024334
ASHG19A3L0000605	20.4736	11.8882	12.1023	46.7474	42.9423	36.8541	41.2774	4.52352	3.97632	3.87178	5.39166	5.33532	5.08918	5.14829	A	P	A	P	P	P	P	chr13	lincRNA-LNX2	AAAGCCAAGATGCCAAAATAAGGGGAACCAAAATGGTTTGTTGTGCAGCCAATGGGTTTT	601	AW361687	lincRNA	+	28423867	28003341	noncoding	intron sense-overlapping	NM_145657	GSX1	GS homeobox 1	+	28366779	28368089
ASHG19A3L0000605	20.4736	11.8882	12.1023	46.7474	42.9423	36.8541	41.2774	4.52352	3.97632	3.87178	5.39166	5.33532	5.08918	5.14829	A	P	A	P	P	P	P	chr13	lincRNA-LNX2	AAAGCCAAGATGCCAAAATAAGGGGAACCAAAATGGTTTGTTGTGCAGCCAATGGGTTTT	601	AW361687	lincRNA	+	28423867	28003341	noncoding	intronic antisense	NM_153371	LNX2	ligand of Numb protein X 2	-	28120049	28194720
ASHG19A3L0000605	20.4736	11.8882	12.1023	46.7474	42.9423	36.8541	41.2774	4.52352	3.97632	3.87178	5.39166	5.33532	5.08918	5.14829	A	P	A	P	P	P	P	chr13	lincRNA-LNX2	AAAGCCAAGATGCCAAAATAAGGGGAACCAAAATGGTTTGTTGTGCAGCCAATGGGTTTT	601	AW361687	lincRNA	+	28423867	28003341	noncoding	intronic antisense	NM_001166262	MTIF3	"translation initiation factor IF-3,"	-	28009775	28024326
ASHG19A3L0000605	20.4736	11.8882	12.1023	46.7474	42.9423	36.8541	41.2774	4.52352	3.97632	3.87178	5.39166	5.33532	5.08918	5.14829	A	P	A	P	P	P	P	chr13	lincRNA-LNX2	AAAGCCAAGATGCCAAAATAAGGGGAACCAAAATGGTTTGTTGTGCAGCCAATGGGTTTT	601	AW361687	lincRNA	+	28423867	28003341	noncoding	intronic antisense	NM_152912	MTIF3	"translation initiation factor IF-3,"	-	28009775	28024739
ASHG19A3L0000605	20.4736	11.8882	12.1023	46.7474	42.9423	36.8541	41.2774	4.52352	3.97632	3.87178	5.39166	5.33532	5.08918	5.14829	A	P	A	P	P	P	P	chr13	lincRNA-LNX2	AAAGCCAAGATGCCAAAATAAGGGGAACCAAAATGGTTTGTTGTGCAGCCAATGGGTTTT	601	AW361687	lincRNA	+	28423867	28003341	noncoding	intron sense-overlapping	NM_152705	POLR1D	DNA-directed RNA polymerases I and III subunit	+	28195915	28241559
ASHG19A3L0000605	20.4736	11.8882	12.1023	46.7474	42.9423	36.8541	41.2774	4.52352	3.97632	3.87178	5.39166	5.33532	5.08918	5.14829	A	P	A	P	P	P	P	chr13	lincRNA-LNX2	AAAGCCAAGATGCCAAAATAAGGGGAACCAAAATGGTTTGTTGTGCAGCCAATGGGTTTT	601	AW361687	lincRNA	+	28423867	28003341	noncoding	exon sense-overlapping	NM_002097	GTF3A	transcription factor IIIA	+	27998680	28009846
ASHG19A3L0000605	20.4736	11.8882	12.1023	46.7474	42.9423	36.8541	41.2774	4.52352	3.97632	3.87178	5.39166	5.33532	5.08918	5.14829	A	P	A	P	P	P	P	chr13	lincRNA-LNX2	AAAGCCAAGATGCCAAAATAAGGGGAACCAAAATGGTTTGTTGTGCAGCCAATGGGTTTT	601	AW361687	lincRNA	+	28423867	28003341	noncoding	intron sense-overlapping	NM_015972	POLR1D	DNA-directed RNA polymerases I and III subunit	+	28195915	28197590
ASHG19A3A029654	40.2284	18.7679	37.8749	17.1944	11.919	10.6188	74.5126	5.47413	4.52855	5.44954	3.86546	3.36349	3.15728	6.03385	A	P	P	P	A	A	P	chr6	NCRNA00171	AGTTAAAAACAAAGCTAAGTGTTCTGGGACGTATAGTTCTAGCGTTCCTTGGGTCCCGCT	2445	NR_026751	RefSeq_NR	-	30028961	29968788	noncoding	bidirectional	NM_014596	ZNRD1	DNA-directed RNA polymerase I subunit RPA12	+	30029035	30032686
ASHG19A3A029654	40.2284	18.7679	37.8749	17.1944	11.919	10.6188	74.5126	5.47413	4.52855	5.44954	3.86546	3.36349	3.15728	6.03385	A	P	P	P	A	A	P	chr6	NCRNA00171	AGTTAAAAACAAAGCTAAGTGTTCTGGGACGTATAGTTCTAGCGTTCCTTGGGTCCCGCT	2445	NR_026751	RefSeq_NR	-	30028961	29968788	noncoding	bidirectional	NM_170783	ZNRD1	DNA-directed RNA polymerase I subunit RPA12	+	30029035	30032686
ASHG19A3L0002393	245.494	196.975	255.639	388.701	441.543	325.501	439.674	7.97004	7.67215	8.05634	8.58795	8.84726	8.35154	8.72036	P	P	P	P	P	P	P	chr1	lincRNA-ABCD3	TTTAATTAGACATTTCTCAGAGAATCCTGCCTCTGCTCTGAAGCCTTTCTGTTCGCTCCG	459	DB455579	lincRNA	+	94800136	94713413	noncoding	intergenic
ASHG19A3A020885	25.494	16.6162	22.5725	31.826	33.8458	35.674	35.4759	4.84305	4.37708	4.72873	4.81591	4.97854	5.03757	4.91718	A	P	P	P	P	P	P	chr3	AC093415.2	TTCAGGTCTACAGCACACACACGATGTACCCAAGAAGAGTGATTAATTTACAAACTGACA	578	ENST00000438136	Ensembl	-	37903229	37795179	noncoding	bidirectional	NM_001008392	CTDSPL	CTD small phosphatase-like protein isoform 1	+	37903668	38025960
ASHG19A3A020885	25.494	16.6162	22.5725	31.826	33.8458	35.674	35.4759	4.84305	4.37708	4.72873	4.81591	4.97854	5.03757	4.91718	A	P	P	P	P	P	P	chr3	AC093415.2	TTCAGGTCTACAGCACACACACGATGTACCCAAGAAGAGTGATTAATTTACAAACTGACA	578	ENST00000438136	Ensembl	-	37903229	37795179	noncoding	bidirectional	NM_005808	CTDSPL	CTD small phosphatase-like protein isoform 2	+	37903668	38025960
ASHG19A3A020885	25.494	16.6162	22.5725	31.826	33.8458	35.674	35.4759	4.84305	4.37708	4.72873	4.81591	4.97854	5.03757	4.91718	A	P	P	P	P	P	P	chr3	AC093415.2	TTCAGGTCTACAGCACACACACGATGTACCCAAGAAGAGTGATTAATTTACAAACTGACA	578	ENST00000438136	Ensembl	-	37903229	37795179	noncoding	intronic antisense	NM_002207	ITGA9	integrin alpha-9 precursor	+	37493812	37861281
ASHG19A3L0001644	24.6238	13.1893	19.6836	21.9373	34.4522	30.1798	25.5022	4.78944	4.09463	4.54706	4.24263	5.00673	4.78917	4.40882	A	P	P	P	P	P	P	chr5	lincRNA-IRX1-7	CATGCATTTTTGTCAGACGGTCTATGGTTTTCAAAAGTGAATCTTTCCCTTGCAGGAGAA	11776	chr5:3737400-3749175-	lincRNA	-	3749175	3737400	noncoding	intergenic
ASHG19A3A020677	43.5582	46.1197	50.9228	79.8748	94.0611	106.959	88.8147	5.58953	5.702	5.85411	6.20379	6.51327	6.67214	6.29339	P	P	P	P	P	P	P	chr3	BC036698	ATGACCACATGTGGGACTATTTCAACTGCCACGAGAAATCCCAGAAGGATTATTGTTTTG	3252	uc003brm.2	UCSC_knowngene	-	9438338	9391373	noncoding	intronic antisense	NM_001114092	THUMPD3	THUMP domain-containing protein 3	+	9404716	9428475
ASHG19A3A020677	43.5582	46.1197	50.9228	79.8748	94.0611	106.959	88.8147	5.58953	5.702	5.85411	6.20379	6.51327	6.67214	6.29339	P	P	P	P	P	P	P	chr3	BC036698	ATGACCACATGTGGGACTATTTCAACTGCCACGAGAAATCCCAGAAGGATTATTGTTTTG	3252	uc003brm.2	UCSC_knowngene	-	9438338	9391373	noncoding	intronic antisense	NM_015453	THUMPD3	THUMP domain-containing protein 3	+	9404716	9428475
ASHG19A3A028159	76.029	71.1784	74.8425	70.4858	93.8517	92.1147	98.8541	6.38132	6.28573	6.38563	6.01022	6.51005	6.44678	6.45182	P	P	P	P	P	P	P	chr5	CTD-2201E18.1	TCATCGGGACCCCCCAAAAAACTATTTTGACTCAAGAAGCCATAATCACTGAAGAGAGGT	469	ENST00000503606	Ensembl	+	42973194	42972725	noncoding	intergenic
ASHG19A3L0003366	898.915	939.885	833.183	638.005	978.694	921.081	1047.91	9.70997	9.77424	9.67009	9.35522	10.0549	9.92667	10.0524	P	P	P	P	P	P	P	chr10	lincRNA-ZEB1-5	TGGCTGCCAGCACTTAATGTGATTTCCCCCCATCTCTGGCAACTGAGAGAATAAAAAACT	500	BX111887	lincRNA	-	32049105	32048015	noncoding	intergenic
ASHG19A3A021254	47.6266	56.1778	50.2103	44.9513	73.4329	84.9712	72.8239	5.71477	5.96405	5.83412	5.33476	6.14137	6.32486	5.99576	P	P	P	P	P	P	P	chr3	RP11-398A8.3	TATTGTATCAGCTGAGACTGCAGGGTAGACTGCAAGAAGTGCCTCCTTGCTGATGGACTG	492	ENST00000481148	Ensembl	-	72291716	72109991	noncoding	intergenic
ASHG19A3L0002365	5	5.69786	5	34.6033	30.4333	29.2155	39.5321	2.37766	2.86753	2.39437	4.93883	4.82275	4.737	5.07836	A	A	A	P	P	P	P	chr1	lincRNA-PPIAL4B-1	GGTCAAATTATCATGCAGAAGGAGAAAAGGGTTTTGTTAACAATTTACACACCAATTGGA	12911	chr1:149731347-149744257-	lincRNA	-	149744257	149731347	noncoding	intergenic
ASHG19A3A009460	127.124	137.738	110.25	210.802	188.719	207.164	202.042	7.08074	7.18948	6.92444	7.65156	7.55824	7.6676	7.54038	P	P	P	P	P	P	P	chr17		TTACATGCAAAATGGCATGCAAATGAGGCCTGGTGCCTTTTGGGGTATGAATCGTAGAAC	2036	AK096059	misc_RNA	+	37707229	37705193	noncoding	intergenic
ASHG19A3L0003163	319.596	317.569	304.829	1318.05	502.131	987.971	613.539	8.32933	8.31595	8.30487	10.4603	9.05281	10.0362	9.23137	P	P	P	P	P	P	P	chr2	lincRNA-KCNE4-1	GATTTGATGTCATAGCTTAAGCCCAAAGGCAAAAGAAAGTCCCTTCTCCTCATCCTCCAC	4220	chr2:223964483-223968702-	lincRNA	-	223968702	223964483	noncoding	intergenic
ASHG19A3L0002520	88.0854	89.6714	95.6727	139.846	85.1411	60.601	74.8149	6.57978	6.60199	6.7275	7.02778	6.36167	5.82796	6.04001	P	P	P	P	P	P	P	chr12	lincRNA-MED13L-5	TGTAATCTGGTCTTCTGGTGCCAGCCATCCTTGAAGTGACCTTCCTTTTTTGGTCGGTGG	818	BF575745	lincRNA	+	115662417	115661844	noncoding	intergenic
ASHG19A3A052464	63.4371	64.3687	63.7039	78.7922	106.435	108.318	116.003	6.11444	6.14635	6.16171	6.18185	6.695	6.68898	6.70045	P	P	P	P	P	P	P	chr15		ATGAATTTGAAATAATGTCCCGCACTGGGTTAACTGAACTCTCCTGCCAGCAGAGCTGAT	3568	AK023763	misc_RNA	-	82048420	82044851	noncoding	intergenic
ASHG19A3L0001808	16.1912	271.051	18.5917	53.1745	16.4057	40.7674	23.2863	4.17948	8.0993	4.46584	5.58737	3.88592	5.23582	4.26964	P	A	P	P	P	P	P	chr6	lincRNA-TNFRSF21-2	CAGTCTTGGTTTTATTACTGATTATCTACATAATTTCATTGATCTGTCCCGCTACTCCCC	14826	chr6:47389241-47404066-	lincRNA	-	47404066	47389241	noncoding	intergenic
ASHG19A3L0000490	105.595	96.9641	71.8605	2623.55	2410.9	2587.22	2544.82	6.82949	6.71191	6.32879	11.4625	11.3733	11.4513	11.3624	P	P	P	P	P	P	P	chr12	lincRNA-CCND2-3	TGCAGTCTGTGCCTTTCATTGCCTTCCTGGAAAATAATAACTAAACTCTTCCTCAAAAAA	733	BX096603	lincRNA	+	4019676	3980899	noncoding	intronic antisense	NM_020367	PARP11	poly [ADP-ribose] polymerase 11	-	3918026	3982608
ASHG19A3A040076	16.4266	11.8877	25.5555	416.725	427.946	455.702	429.851	4.19985	3.97611	4.90178	8.69975	8.79204	8.86374	8.68516	A	A	P	P	P	P	P	chrX	XIST	TTCGTAAATTAAATAGGTCTGGCCCAGAAGACCCACTCAATTGCCTTTGAGATTAAAAAA	19271	NR_001564	RefSeq_NR	-	73072588	73040494	noncoding	intergenic
ASHG19A3A025129	923.265	872.645	871.925	664.848	582.801	657.15	655.901	9.74849	9.68398	9.7287	9.41625	9.27033	9.41798	9.33817	P	P	P	P	P	P	P	chr4	ZNF732	CCCAGCAGAATGTATATAGAGATGTGATGTTGGAGAACTATAGAAACCTGGTCTCCCTGG	1032	ENST00000397097	Ensembl	+	248643	212428	noncoding	intergenic
ASHG19A3L0002059	360.841	321.026	333.707	364.87	409.861	425.298	458.552	8.49896	8.32864	8.43086	8.49918	8.72378	8.75486	8.78518	P	P	P	P	P	P	P	chr8	lincRNA-GFRA2-6	TTCTGGCTGGCAGCCAGGAACTGAGTATGACAATGTTGTACTAAAGAAAGGCCCAAAGTA	1279	DQ890550	lincRNA	-	21771113	21563901	noncoding	intron sense-overlapping	NM_001165038	GFRA2	GDNF family receptor alpha-2 isoform b	-	21549529	21646346
ASHG19A3L0002059	360.841	321.026	333.707	364.87	409.861	425.298	458.552	8.49896	8.32864	8.43086	8.49918	8.72378	8.75486	8.78518	P	P	P	P	P	P	P	chr8	lincRNA-GFRA2-6	TTCTGGCTGGCAGCCAGGAACTGAGTATGACAATGTTGTACTAAAGAAAGGCCCAAAGTA	1279	DQ890550	lincRNA	-	21771113	21563901	noncoding	exon sense-overlapping	NM_003974	DOK2	docking protein 2	-	21766383	21771205
ASHG19A3L0002059	360.841	321.026	333.707	364.87	409.861	425.298	458.552	8.49896	8.32864	8.43086	8.49918	8.72378	8.75486	8.78518	P	P	P	P	P	P	P	chr8	lincRNA-GFRA2-6	TTCTGGCTGGCAGCCAGGAACTGAGTATGACAATGTTGTACTAAAGAAAGGCCCAAAGTA	1279	DQ890550	lincRNA	-	21771113	21563901	noncoding	intron sense-overlapping	NM_001495	GFRA2	GDNF family receptor alpha-2 isoform a	-	21549529	21646346
ASHG19A3L0002059	360.841	321.026	333.707	364.87	409.861	425.298	458.552	8.49896	8.32864	8.43086	8.49918	8.72378	8.75486	8.78518	P	P	P	P	P	P	P	chr8	lincRNA-GFRA2-6	TTCTGGCTGGCAGCCAGGAACTGAGTATGACAATGTTGTACTAAAGAAAGGCCCAAAGTA	1279	DQ890550	lincRNA	-	21771113	21563901	noncoding	intron sense-overlapping	NM_001165039	GFRA2	GDNF family receptor alpha-2 isoform c	-	21549529	21646346
ASHG19A3L0002953	158.319	174.846	167.476	101.122	125.936	100.699	133.114	7.37712	7.51182	7.48744	6.54865	6.95107	6.58054	6.90594	P	P	P	P	P	P	P	chr1	lincRNA-ZNF672	CAATGATGAGAAAAAGGACACTATCTCACTTCCCATGTAGGTGATAGTCTATGGTGCTCA	558	DB288399	lincRNA	+	249123570	249123012	noncoding	intergenic
ASHG19A3A035264	18.1837	14.6316	14.8525	16.3773	22.1097	12.1304	23.7961	4.34964	4.221	4.15717	3.78891	4.34009	3.35711	4.30318	A	P	A	P	P	A	P	chr1	RP5-1198E17.1	ACATAATAGGTCATGGTGGTCACATGAAAAGTAAAGGGTAACCGATTGGGGTAGGTGGTG	853	ENST00000416578	Ensembl	+	173833079	173831289	noncoding	intergenic
ASHG19A3L0000239	181.575	170.81	171.725	138.761	208.331	108.113	233.556	7.56531	7.47868	7.52427	7.01702	7.70686	6.68637	7.76062	P	P	P	P	P	P	P	chr10	lincRNA-ZNF37A-2	GATCCTATTCAAATCCCTTTACCTCCCATTTAATTTCCATTCCATTTCGGGTTGGTTCCA	805	EL585127	lincRNA	-	39150281	38779976	noncoding	intergenic
ASHG19A3L0002990	24.1616	25.5603	26.59	27.3065	21.7983	24.4168	23.6175	4.76467	4.91481	4.96033	4.58484	4.32108	4.46928	4.29016	A	P	P	P	P	P	P	chr2	lincRNA-KCNS3-4	GATGGAGAAAAATACAAAACAGACAACAGCTTCACTTTCTATACTACTCATTAGCTGAGA	20551	chr2:18542044-18562594-	lincRNA	-	18562594	18542044	noncoding	intergenic
ASHG19A3A051299	3895.2	2473.23	3793.99	4341.13	3021.43	3575.05	5013.87	11.7594	11.1284	11.7899	12.2053	11.7038	11.9143	12.3388	P	P	P	P	P	P	P	chr14	AX746599	TGTATCCATATTAGCATATGAACTTCATCAGACAAGCACTCTCCCTCCAACAGAGGGAGA	2524	uc001wkc.1	UCSC_knowngene	+	24013485	23982557	noncoding	intronic antisense	NM_033400	ZFHX2	zinc finger homeobox protein 2	-	23990063	24020858
ASHG19A3L0002079	89.0662	87.5878	112.564	120.683	164.057	115.569	191.023	6.59447	6.56838	6.94979	6.8122	7.34816	6.78449	7.45377	P	P	P	P	P	P	P	chr8	lincRNA-KCNU1-3	ATTGATGAGGTCAGCACCACTGCTTTCTTCCAGGGGGTGTTTGTTTTTCTCCTTAATCCT	496	BQ446632	lincRNA	-	37542350	37541867	noncoding	intergenic
ASHG19A3L0003298	2048.28	1759.79	1801.45	3798.45	2691.4	3348.8	2784.06	10.8585	10.6357	10.7331	11.9994	11.539	11.825	11.4898	P	P	P	P	P	P	P	chr3	lincRNA-KPNA1	AGCTCCAGTCTTTGCCATGGTCTGCAAACCTCCTTCTTAGCGAGACCCCCTCCCCGACCC	382	AW269809	lincRNA	-	122236198	122233924	noncoding	intergenic
ASHG19A3L0000301	266.738	292.457	283.711	382.642	215.044	169.749	191.823	8.07766	8.19796	8.20617	8.56415	7.7573	7.36792	7.46171	P	P	P	P	P	P	P	chr11	lincRNA-MMP20	ATCTACTTAAAATTACAAGCTACCTCCCCAGCTCATGATTCTCAAATGTCTGGGCACTGC	15301	chr11:102425615-102440915+	lincRNA	+	102440915	102425615	noncoding	intergenic
ASHG19A3L0001681	82.354	83.8488	82.6313	115.913	117.362	108.202	120.812	6.49046	6.50698	6.52781	6.74454	6.84414	6.68755	6.76295	P	P	P	P	P	P	P	chr5	lincRNA-FOXD1-2	GCGAGCCCCGCCGCGCCGAGCCTCCCGGGCGTCCGCAGGCCTGGCGCACACCGAAGCGGG	180	exon2995+	lincRNA	+	72715727	72715548	noncoding
ASHG19A3L0002523	11.5543	5.19078	5	25.1901	18.7085	16.4874	27.6515	3.71306	2.32965	2.39437	4.45607	4.0974	3.85897	4.52772	A	A	A	P	P	P	P	chr12	lincRNA-RBM19-3	GTGCCTGAAGCCTGGATAATAATAGAATGACAGCTGATGATTCATCAGTGCTCTTCAGAG	474	CR742860	lincRNA	-	114679575	114676774	noncoding	intergenic
ASHG19A3L0003459	83.7738	74.3022	72.6006	88.4965	78.8071	78.5401	101.547	6.51395	6.34255	6.3442	6.3571	6.24824	6.21242	6.49217	P	P	P	P	P	P	P	chr2	lincRNA-EN1-2	TTCATATTTTGATTCCTTTGTTTAGACAGTTTCTCTCAGGTTCTCCTGTGTCGGCCCGGG	475	DB452487	lincRNA	+	119068596	119068121	noncoding	intergenic
ASHG19A3A040103	36.3413	37.9301	34.6974	15.1197	11.135	11.4161	20.6965	5.33731	5.44123	5.32175	3.66345	3.25555	3.26375	4.07799	P	P	P	P	A	A	P	chr1		CTAATCCCCACAGCACAAGTGGGAATTAATGTGTGCTCACTGATTCATGCTGGTTGAAGT	2613	AK091999	misc_RNA	+	219446727	219444115	noncoding	intergenic
ASHG19A3L0003428	21.2546	11.1309	23.9848	25.9398	38.5527	45.7114	36.7118	4.57291	3.89595	4.81077	4.50371	5.17647	5.41017	4.96955	A	P	P	P	P	P	P	chr11	lincRNA-SLC29A2	TTTAGGGCTGTCAAAGTGTGATCTTGTCTTGCTCTGGACAATTGTGTCATTGGAGGGATC	559	CK904746	lincRNA	-	66184515	66177650	noncoding	intergenic
ASHG19A3L0000792	31.4999	19.5059	20.298	23.5861	45.2593	38.653	48.4387	5.13358	4.57561	4.5881	4.35508	5.41935	5.15984	5.38585	A	P	P	P	P	P	P	chr14	lincRNA-GLRX5-1	AAATAGGATATGAGTGCGTGTTCCTGCTTCACACCAAGAATGAGATGCAGGATATGCTGG	432	AI950243	lincRNA	-	96111568	96109672	noncoding	intergenic
ASHG19A3A049932	133.854	128.817	138.619	362.409	381.064	434.964	350.794	7.15153	7.09818	7.23557	8.4878	8.61464	8.78835	8.3767	P	P	P	P	P	P	P	chr13	AK054845	CCTTCCAAATATATGTATGTTTCTTTTCTGAAGATAGACGTGTGTGTGTTTGTGTGTATC	2406	uc001uoi.2	UCSC_knowngene	+	22850657	22615113	noncoding	intergenic
ASHG19A3L0002558	158.263	173.886	173.394	118.83	185.976	199.859	185.202	7.37658	7.50375	7.53571	6.7855	7.53676	7.61155	7.40523	P	P	P	P	P	P	P	chr7	lincRNA-NFE2L3-2	TCTTCTTCAGGAAGAGTAAAGCATGTCTTCTAGTTCTACTTCCTTCCCGGTTAGCCAGCT	431	AW450413	lincRNA	+	25896427	25895917	noncoding	intergenic
ASHG19A3A032043	69.9089	73.06	78.0859	152.905	60.0986	63.2161	57.9201	6.25975	6.31975	6.44557	7.16446	5.84604	5.89609	5.6577	P	P	P	P	P	P	P	chr6	RP11-527F13.1	AAGATAGAATTTTGGACCTGGATCACCTGTAGCCTGCCTAGCAATGAAGACCTCATCAGT	583	ENST00000444229	Ensembl	+	126523385	126498338	noncoding	intergenic
ASHG19A3A013598	37.9337	21.8198	35.653	73.1963	42.1681	35.8117	25.5684	5.39382	4.71237	5.36091	6.06554	5.31059	5.04415	4.41211	A	P	P	P	P	P	P	chr2	AK094343	AGCTGTCTGTGTGCCTTGCATTTCAATCAGCAGCCTTACAAATGATGATGAGGAGAAGGA	1892	uc002rvu.1	UCSC_knowngene	-	47572105	47441087	noncoding	intergenic
ASHG19A3A021933	49.5468	31.9263	47.5755	50.6308	84.1847	44.7058	78.2416	5.77218	5.21171	5.76085	5.51655	6.34478	5.37986	6.10656	P	P	P	P	P	P	P	chr3	RP11-85P9.3	TTCTCAGGGTCTTGCCGCCTTTCTCAAGCTCAGCCTGTGGAGTAAAGCGCAGGCACATCT	427	ENST00000449106	Ensembl	-	171618530	171594141	noncoding	intergenic
ASHG19A3A010451	217.559	207.484	207.035	95.3976	84.772	95.3432	107.768	7.8096	7.74767	7.77478	6.467	6.35404	6.50023	6.58787	P	P	P	P	P	P	P	chr18	LOC339290	GGTAACATACTAGCAGACCAGATAACTACTTATGCAAACCTCAGATAACCACTAATTTAA	5487	uc010dko.2	UCSC_knowngene	+	5246503	5238098	noncoding	intergenic
ASHG19A3A028497	5	5.24721	5	34.7534	32.6402	32.3051	40.1135	2.37766	2.33187	2.39437	4.94589	4.92576	4.88895	5.10271	A	A	A	P	P	P	P	chr5	CTC-454M9.1	TGAAGTGAAGTCCACTATGTGCTGGGCACACAGAGAATAGAGCATGAAACAAAAGCAACA	501	ENST00000514092	Ensembl	+	88761799	88185261	noncoding	intronic antisense	NM_001131005	MEF2C	myocyte-specific enhancer factor 2C isoform 2	-	88014057	88199922
ASHG19A3A028497	5	5.24721	5	34.7534	32.6402	32.3051	40.1135	2.37766	2.33187	2.39437	4.94589	4.92576	4.88895	5.10271	A	A	A	P	P	P	P	chr5	CTC-454M9.1	TGAAGTGAAGTCCACTATGTGCTGGGCACACAGAGAATAGAGCATGAAACAAAAGCAACA	501	ENST00000514092	Ensembl	+	88761799	88185261	noncoding	intronic antisense	NM_001193347	MEF2C	myocyte-specific enhancer factor 2C isoform 3	-	88014057	88199922
ASHG19A3L0000562	9.23601	5.38474	6.34919	31.8396	42.0178	32.0639	40.9273	3.41139	2.35243	3.04468	4.81636	5.30448	4.87719	5.13594	A	A	A	P	P	P	P	chr12	lincRNA-NEDD1-2	CCAGGATGCAAGTCTCTGTTTGATGGTAGTAATGAACAAGAAGAAATGCCAGAGGAGGAT	2205	AX747187	lincRNA	+	97024344	96933914	noncoding	intergenic
ASHG19A3A033599	68.873	35.3469	69.0177	35.4786	199.385	247.598	242.785	6.2371	5.34699	6.27231	4.97542	7.64353	7.9434	7.82409	P	P	P	P	P	P	P	chr7	AC008155.2	TGTGTCCAACTCCAGGTCACCCAGCATGTAATTGGGATGAATTCTAAAACACCATGTGGA	397	ENST00000464337	Ensembl	-	137983229	137982832	noncoding	intergenic
ASHG19A3L0000444	18.3271	16.4581	14.9819	16.3937	16.6038	20.8823	20.5653	4.36091	4.3642	4.17098	3.79085	3.90435	4.22762	4.06763	A	P	A	P	P	P	P	chr12	lincRNA-TMEM132B-2	AATACTAATGAAAATTGACAAACATCTTCTCAGTATCCATGGGTGTTTGACTCTGGCCAC	519	AL707640	lincRNA	+	125760639	125759459	noncoding	intergenic
ASHG19A3A040526	18.9243	16.8547	10.2642	16.6405	25.6376	27.5134	32.3424	4.40845	4.39695	3.65204	3.8149	4.55839	4.64566	4.7763	A	P	A	P	P	P	P	chrX		TCAGTTTTCTATTCTCCAGTCTGAAACCACCGCCTTCAGACTATGAAGACTTCAGTGAAG	2746	BC044778	misc_RNA	-	150683856	150681175	noncoding	intergenic
ASHG19A3A040283	8070.59	9106.94	8481.85	2572.57	2754.31	2872.16	2807.6	12.784	12.9741	12.919	11.4326	11.5694	11.5993	11.5056	P	P	P	P	P	P	P	chrX	RP1-298J18.1	AAAGAAGATGAAGAAGTTTTCAGGGGAGATTGCCTACTCTGGGTGGGTGTTTGAGAAGTC	551	ENST00000430258	Ensembl	-	110867954	110867403	noncoding	intergenic
ASHG19A3A030705	7.97978	16.1685	13.2627	16.5537	16.6609	33.7704	36.9508	3.20544	4.33983	3.99442	3.80748	3.90995	4.95249	4.97906	A	A	A	P	P	P	P	chr6	BC031960	CTATAGCTGTATTGCTCAATCCTTTCCTGGGATCTGGGAGAAAATAAATTTCATTTTTGG	883	uc003qod.2	UCSC_knowngene	-	151549592	151517809	noncoding	intergenic
ASHG19A3A041340	64.3509	59.8798	61.7767	125.454	32.0986	97.9844	62.9948	6.13535	6.04781	6.12284	6.8719	4.90122	6.54077	5.78299	P	P	P	P	P	P	P	chrX		TCAAGAAGTAGAATACTGTTAGCAGTCCAGAAATGCCATTGATGTCCCCTTCAGTCATCC	2297	AK091319	misc_RNA	+	102853832	102851535	noncoding	intergenic
ASHG19A3A052205	82.279	97.4784	82.3187	41.6919	25.6305	33.5161	26.1585	6.48894	6.71976	6.52243	5.21665	4.55797	4.94078	4.44614	P	P	P	P	P	P	P	chr15	AC092868.2	CTTACCATAAACAGGGCCATGCTGAGAAAATACAAATAAAAAAGACTATCAAGATGCATG	777	ENST00000396071	Ensembl	-	59694203	59693421	noncoding	intergenic
ASHG19A3L0003113	108.336	81.2057	113.307	149.731	185.1	131.693	201.948	6.86547	6.46344	6.9569	7.13226	7.52972	6.98497	7.53916	P	P	P	P	P	P	P	chr5	lincRNA-FLJ37543-1	TAAGGACCTTGTCCAGCCTCCATTCCTGACACCCTTTCTGAAAGGATATCACTTCTGTTA	115	BF869762	lincRNA	-	61583108	61582993	noncoding	intergenic
ASHG19A3L0000352	160.058	133.855	157.946	256.871	366.289	286.226	411.222	7.39523	7.14891	7.40798	7.96038	8.55129	8.16254	8.61483	P	P	P	P	P	P	P	chr11	lincRNA-TRPM5	TCTTGCCTCAGTTTCCTTATCTTTAGCAGGGAGGATCCCCGCTTCCCTGGGCTGTGAAGG	10501	chr11:2448349-2458849-	lincRNA	-	2458849	2448349	noncoding	intergenic
ASHG19A3L0002399	335.028	311.566	366.912	149.364	457.436	486.209	469.659	8.3999	8.28533	8.56415	7.12929	8.90238	8.96464	8.82136	P	P	P	P	P	P	P	chr1	lincRNA-SEP15	AACCATATGTGACTTGTGTGCTTCCCCTTTCCAGCTCAGTAATACAAAGAAGAAGCGTTC	11541	chr1:87222750-87234290+	lincRNA	+	87234290	87222750	noncoding	intergenic
ASHG19A3A030841	22.3482	11.9309	20.6889	45.5963	9.49311	37.3156	31.4756	4.64725	3.97975	4.61455	5.3547	3.03907	5.1068	4.73386	A	P	P	P	A	P	P	chr6		GCTCCTCACAAAGCTGTCATTCTTATGCCTTGCATGAATTTGGGTATTTTAACTTGTCTA	771	AY726573	misc_RNA	-	169361262	169360506	noncoding	intergenic
ASHG19A3L0000820	395.073	357.399	327.646	300.79	270.396	267.797	291.262	8.61778	8.47621	8.40469	8.19834	8.11469	8.06149	8.10153	P	P	P	P	P	P	P	chr15	lincRNA-ZNF280D	CTACAGATTTTGTGTAGCTGCCTATTTGTAGATTTTAAATTTGGCTGTTACTAAGCCCAT	4811	BC036541	lincRNA	-	57210767	56945018	noncoding	exon sense-overlapping	NM_001002843	ZNF280D	zinc finger protein 280D isoform 2	-	56922373	57025787
ASHG19A3L0000820	395.073	357.399	327.646	300.79	270.396	267.797	291.262	8.61778	8.47621	8.40469	8.19834	8.11469	8.06149	8.10153	P	P	P	P	P	P	P	chr15	lincRNA-ZNF280D	CTACAGATTTTGTGTAGCTGCCTATTTGTAGATTTTAAATTTGGCTGTTACTAAGCCCAT	4811	BC036541	lincRNA	-	57210767	56945018	noncoding	exon sense-overlapping	NM_017661	ZNF280D	zinc finger protein 280D isoform 1	-	56922373	57025787
ASHG19A3L0000820	395.073	357.399	327.646	300.79	270.396	267.797	291.262	8.61778	8.47621	8.40469	8.19834	8.11469	8.06149	8.10153	P	P	P	P	P	P	P	chr15	lincRNA-ZNF280D	CTACAGATTTTGTGTAGCTGCCTATTTGTAGATTTTAAATTTGGCTGTTACTAAGCCCAT	4811	BC036541	lincRNA	-	57210767	56945018	noncoding	bidirectional	NM_207036	TCF12	transcription factor 12 isoform a	+	57210832	57580714
ASHG19A3L0000820	395.073	357.399	327.646	300.79	270.396	267.797	291.262	8.61778	8.47621	8.40469	8.19834	8.11469	8.06149	8.10153	P	P	P	P	P	P	P	chr15	lincRNA-ZNF280D	CTACAGATTTTGTGTAGCTGCCTATTTGTAGATTTTAAATTTGGCTGTTACTAAGCCCAT	4811	BC036541	lincRNA	-	57210767	56945018	noncoding	bidirectional	NM_207037	TCF12	transcription factor 12 isoform a	+	57210832	57580714
ASHG19A3L0000820	395.073	357.399	327.646	300.79	270.396	267.797	291.262	8.61778	8.47621	8.40469	8.19834	8.11469	8.06149	8.10153	P	P	P	P	P	P	P	chr15	lincRNA-ZNF280D	CTACAGATTTTGTGTAGCTGCCTATTTGTAGATTTTAAATTTGGCTGTTACTAAGCCCAT	4811	BC036541	lincRNA	-	57210767	56945018	noncoding	exon sense-overlapping	NM_001002844	ZNF280D	zinc finger protein 280D isoform 3	-	56991557	57025787
ASHG19A3L0000820	395.073	357.399	327.646	300.79	270.396	267.797	291.262	8.61778	8.47621	8.40469	8.19834	8.11469	8.06149	8.10153	P	P	P	P	P	P	P	chr15	lincRNA-ZNF280D	CTACAGATTTTGTGTAGCTGCCTATTTGTAGATTTTAAATTTGGCTGTTACTAAGCCCAT	4811	BC036541	lincRNA	-	57210767	56945018	noncoding	bidirectional	NM_207038	TCF12	transcription factor 12 isoform b	+	57210832	57580714
ASHG19A3L0000820	395.073	357.399	327.646	300.79	270.396	267.797	291.262	8.61778	8.47621	8.40469	8.19834	8.11469	8.06149	8.10153	P	P	P	P	P	P	P	chr15	lincRNA-ZNF280D	CTACAGATTTTGTGTAGCTGCCTATTTGTAGATTTTAAATTTGGCTGTTACTAAGCCCAT	4811	BC036541	lincRNA	-	57210767	56945018	noncoding	bidirectional	NM_003205	TCF12	transcription factor 12 isoform b	+	57210832	57580714
ASHG19A3A048824	547.178	546.1	548.548	57.0342	56.6095	63.9074	65.0187	9.04494	9.03717	9.08959	5.68654	5.75412	5.91111	5.82926	P	P	P	P	P	P	P	chr12	AC005294.1	ACTGTGGAGGAGGCAGATGCATGCATGGCCACACAAGGGGATGGAAGAGTTGTACAACCA	1083	ENST00000420836	Ensembl	+	68430635	68429546	noncoding	intergenic
ASHG19A3A031496	12.7892	9.48917	13.8304	56.16	55.7968	57.6978	52.3649	3.85888	3.71509	4.0548	5.66242	5.73201	5.75412	5.50601	A	A	A	P	P	P	P	chr6	LOC221442	TAGTTTTCAGTTCCAGACAAAACCATCCAGAACTCAGGAGGCCTTCTCAAGTGAATGCTG	4585	NR_026938	RefSeq_NR	+	41108567	41068772	noncoding	exon sense-overlapping	NM_002505	NFYA	nuclear transcription factor Y subunit alpha	+	41040706	41070146
ASHG19A3A031496	12.7892	9.48917	13.8304	56.16	55.7968	57.6978	52.3649	3.85888	3.71509	4.0548	5.66242	5.73201	5.75412	5.50601	A	A	A	P	P	P	P	chr6	LOC221442	TAGTTTTCAGTTCCAGACAAAACCATCCAGAACTCAGGAGGCCTTCTCAAGTGAATGCTG	4585	NR_026938	RefSeq_NR	+	41108567	41068772	noncoding	exon sense-overlapping	NM_021705	NFYA	nuclear transcription factor Y subunit alpha	+	41040706	41070146
ASHG19A3A036799	36.3756	22.2627	64.2458	115	88.6366	112.241	100.93	5.33868	4.73861	6.17272	6.73383	6.41944	6.73837	6.48165	A	P	P	P	P	P	P	chr1	RP11-108M21.1	AATCAGGAAGTATATCTAAGTCACCTCCAGTAGCCGTAACTCTACCTTGTCCAGTAAAAG	858	ENST00000458683	Ensembl	+	187329455	187061973	noncoding	intergenic
ASHG19A3L0000328	29.397	23.8482	34.6908	203.107	41.5106	46.9552	30.6937	5.04063	4.82724	5.32113	7.59724	5.2876	5.45013	4.69299	A	P	P	P	P	P	P	chr11	lincRNA-BLID-2	ATGTCTTGACTAAACCCACACTTAGTTTGAAAGAAGCTAAGAGTCTGACTCTAGACCAAA	408	BG003184	lincRNA	-	122280320	122279949	noncoding	intergenic
ASHG19A3A022854	114.92	104.452	110.823	119.99	138.023	97.1764	170.038	6.94542	6.81089	6.93088	6.80059	7.08706	6.52733	7.2743	P	P	P	P	P	P	P	chr3	RP11-171G7.1	TAGCAAGTCCTCAAAGGTAAATGCACTGGCTGTTACCTCCAGCAACTCCCTTATCCAAAA	1192	ENST00000464531	Ensembl	+	83987387	83986195	noncoding	intergenic
ASHG19A3L0003107	86.8478	68.5926	84.3302	90.544	91.3813	98.758	99.8897	6.56017	6.23385	6.55782	6.39395	6.46481	6.55227	6.46616	P	P	P	P	P	P	P	chr5	lincRNA-ERBB2IP-2	ATCATCATCAGGTCTGAAATGGGTTCTGCATACCCCGACACCACCTTATATGCTATATCG	552	AA992250	lincRNA	-	65415636	65372703	noncoding	natural antisense	NM_018695	ERBB2IP	protein LAP2 isoform 2	+	65222383	65376850
ASHG19A3L0003107	86.8478	68.5926	84.3302	90.544	91.3813	98.758	99.8897	6.56017	6.23385	6.55782	6.39395	6.46481	6.55227	6.46616	P	P	P	P	P	P	P	chr5	lincRNA-ERBB2IP-2	ATCATCATCAGGTCTGAAATGGGTTCTGCATACCCCGACACCACCTTATATGCTATATCG	552	AA992250	lincRNA	-	65415636	65372703	noncoding	natural antisense	NM_001006600	ERBB2IP	protein LAP2 isoform 7	+	65222383	65376850
ASHG19A3L0001141	17.1833	15.6612	19.035	15.4071	32.6782	29.6044	37.205	4.26308	4.30124	4.50015	3.69494	4.92768	4.75817	4.98877	A	P	P	P	P	P	P	chr2	lincRNA-FZD7-2	ATCTCAGAAACTGAAAAAAGTATCAGTGCTGCTGGGGACAGGAGTCAGAGTTTCCTGTCA	546	CK299764	lincRNA	+	202843427	202842901	noncoding	intergenic
ASHG19A3A033949	3284.04	3092.25	2775.22	4701.05	4876.93	5156.31	5199.04	11.5268	11.4428	11.349	12.3273	12.396	12.4544	12.3976	P	P	P	P	P	P	P	chr7	CR609701	AAACTAATCTTACTGCTAAGCAGTGTGTTGTACTACATAGTGAATGTTCGTGTTTTGGAA	3988	uc003srb.1	UCSC_knowngene	+	7288212	7284224	noncoding	exon sense-overlapping	NM_020156	C1GALT1	glycoprotein-N-acetylgalactosamine	+	7222245	7288251
ASHG19A3A022520	14.2631	12.8157	28.4711	1304.69	1208.38	1257.41	1247.89	4.01182	4.06203	5.0539	10.4442	10.358	10.3994	10.3256	A	A	P	P	P	P	P	chr3	AK124776	TATGGGTTGCTCTGAAATTAGCCTTTACACTTGGCATTGTGAAAAATCTTTCCAAATCAT	4060	uc003cmy.1	UCSC_knowngene	+	44163857	44159797	noncoding	intergenic
ASHG19A3A045510	30.4807	35.3858	34.3445	100.498	42.043	29.6962	44.7012	5.08998	5.34848	5.30817	6.53972	5.3054	4.76326	5.26936	P	P	P	P	P	P	P	chr1	RP11-191G24.2	TATTATAACATTAGTGTTCTCAGCCTGGACCTTTGGCAGGTAAAGCCCTCTGAGCTCAGA	946	ENST00000431943	Ensembl	-	52060569	52027537	noncoding	intergenic
ASHG19A3L0002272	28.456	29.3654	37.1796	54.7728	22.4436	14.1317	28.6062	4.9951	5.09867	5.42232	5.629	4.3642	3.60441	4.58539	P	P	P	P	P	P	P	chrX	lincRNA-ATP11C-1	GGCTTCCTACTCCAAATCCTAATGTTTATTCTAACTAGTATCAGTCTGTTTCAGTCAAAA	541	N48415	lincRNA	-	138929341	138928803	noncoding	intergenic
ASHG19A3L0001642	250.962	218.927	242.812	372.53	184.495	125.465	135.562	7.99986	7.81581	7.98569	8.52707	7.52353	6.91289	6.93707	P	P	P	P	P	P	P	chr5	lincRNA-RANBP3L-1	GAGCTGTATTTCCTGTTTTCACCCACTCCTCTTGTACCATCTTTTCATTAACATGAAACT	654	BU663707	lincRNA	-	36447567	36446938	noncoding	intergenic
ASHG19A3L0002389	52.7046	49.3958	54.999	118.785	85.2748	83.0183	122.896	5.85683	5.79075	5.96027	6.78487	6.36447	6.28938	6.78736	P	P	P	P	P	P	P	chr1	lincRNA-SNX7-2	GCACCTCTTTCTTGGTTATGAATTTTTACTTGTCTCATGTCTGTCTTGAAGAAGTGTGAA	10576	chr1:98805012-98815587+	lincRNA	+	98815587	98805012	noncoding	intergenic
ASHG19A3A049667	565.195	510.687	557.472	225.382	325.016	215.811	360.801	9.08518	8.95166	9.11188	7.75625	8.38134	7.72939	8.41643	P	P	P	P	P	P	P	chr13	AX747962	TTTCAAGAATCTGTCTCTGCTATGAGTCTCAAGAGCCTATTTTGTAACTCAGAAGCCAAG	2328	uc001vjj.1	UCSC_knowngene	-	74993252	74987093	noncoding	intergenic
ASHG19A3A010400	20.8198	16.649	11.0982	21.2405	15.8394	16.8798	21.3067	4.54489	4.3789	3.76218	4.19283	3.82744	3.89427	4.12641	A	P	A	P	P	P	P	chr18		TTACAACCATTTCTGTTGAACAAAAGAACCTTGCAGAACCCGGAGCCAATCACTGGAAGG	2676	AK096231	misc_RNA	-	72818216	72815542	noncoding	intergenic
ASHG19A3L0001508	38.548	34.2862	31.8085	35.6731	53.6939	28.8302	67.5665	5.41636	5.3054	5.20582	4.98348	5.67213	4.71882	5.88611	P	P	P	P	P	P	P	chr4	lincRNA-LPHN3-4	TCCCCACCTTATAGATACACAGGGCACATGGTGCTTACTTTTCCTGAAACAATTCATATC	21551	chr4:60340905-60362455+	lincRNA	+	60362455	60340905	noncoding	intergenic
ASHG19A3L0001471	18.0385	27.1377	24.5407	64.7495	44.0534	44.0156	50.7378	4.33894	4.9971	4.84352	5.88	5.37409	5.35311	5.45573	A	A	P	P	P	P	P	chr4	lincRNA-FGFBP1	TATGAGAACCACCATCATCATGGCAGTTACCTCCAATTCAGCACCTTTTACAGATCATCA	10376	chr4:15911552-15921927+	lincRNA	+	15921927	15911552	noncoding	intergenic
ASHG19A3L0000520	591.935	568.019	555.437	927.756	482.058	359.067	438.385	9.1536	9.09007	9.10742	9.93228	8.98255	8.49337	8.71373	P	P	P	P	P	P	P	chr12	lincRNA-FAM19A2-4	TACTTTATCTTCCCTCTTTATAAAACAGCCCCATCCCCTGAAGAGCTTGAATGAAAACTC	36576	chr12:62007583-62044158+	lincRNA	+	62044158	62007583	noncoding	intergenic
ASHG19A3L0002754	1173.82	944.9	1137.18	1911.72	580.016	618.371	586.786	10.072	9.78292	10.0903	10.9964	9.26085	9.32728	9.16816	P	P	P	P	P	P	P	chr15	lincRNA-SIN3A	TAGTCCTTATCTCCTGGCCTTTCCCTCTCCATACTTTTCACCCAGTGATTCAATTGACTG	521	AW075897	lincRNA	-	75751256	75750735	noncoding	intergenic
ASHG19A3L0001340	491.34	507.802	493.582	73.5198	69.4855	60.3507	62.5375	8.90261	8.94459	8.95098	6.07434	6.06446	5.82186	5.77072	P	P	P	P	P	P	P	chr3	lincRNA-GALNTL2-1	GTACCAGCACAATTTGAGCATTCCCATTAACAAAGGTGTTCACAGTTGAGAAACTCTCCT	3105	AK094780	lincRNA	+	16270147	15935568	noncoding	exon sense-overlapping	NM_054110	GALNTL2	polypeptide	+	16216183	16271253
ASHG19A3L0002696	59.2122	39.2709	55.8071	59.636	83.5784	70.306	84.2664	6.01956	5.48658	5.97962	5.7575	6.33566	6.05848	6.21994	P	P	P	P	P	P	P	chr19	lincRNA-HOOK2	TGTCAATATCTGGGCTGTAGGGGGCCTGCCAGAGTCCTCCATGGTGATGATGCATGGAGT	739	BX106769	lincRNA	-	12890671	12889934	noncoding	intergenic
ASHG19A3A025532	11710.4	9489.91	12576.7	4343.81	8150.02	6732.25	8948.57	13.3087	13.039	13.474	12.2065	13.1608	12.8541	13.2024	P	P	P	P	P	P	P	chr4	RP11-231C18.2	TGACCCTGCCACATTGTATATTCTTGTTCTCCCCCCATGATGCATTTTATTTCAGTATCC	540	ENST00000508241	Ensembl	+	55242919	55242168	noncoding	intergenic
ASHG19A3L0000699	36130.3	35166.3	31583.9	20470.6	18932.9	20340.4	21666.8	14.8856	14.8714	14.7874	14.5147	14.4014	14.4909	14.5019	P	P	P	P	P	P	P	chr13	lincRNA-MBNL2-1	TGTATCAATACTATGTTTTGGTTGTAATATTCAGTTCACCCACCCAATGTACAACCAATG	4571	CR749802	lincRNA	+	98046372	97794089	noncoding	exon sense-overlapping	NM_144778	MBNL2	muscleblind-like protein 2 isoform 1	+	97874573	98046374
ASHG19A3L0000699	36130.3	35166.3	31583.9	20470.6	18932.9	20340.4	21666.8	14.8856	14.8714	14.7874	14.5147	14.4014	14.4909	14.5019	P	P	P	P	P	P	P	chr13	lincRNA-MBNL2-1	TGTATCAATACTATGTTTTGGTTGTAATATTCAGTTCACCCACCCAATGTACAACCAATG	4571	CR749802	lincRNA	+	98046372	97794089	noncoding	exon sense-overlapping	NM_207304	MBNL2	muscleblind-like protein 2 isoform 3	+	97874573	98046374
ASHG19A3A039964	288.452	291.516	268.733	329.946	138.841	189.955	171.433	8.18339	8.19488	8.12545	8.34316	7.09735	7.53859	7.28707	P	P	P	P	P	P	P	chrX	SPIN3	TATGGTTTCCTTCACCCCACACCAATGTTATGAATGAGACCAGCAGACCAACAGCAAACA	1721	NR_027139	RefSeq_NR	-	57021988	57002804	noncoding	exon sense-overlapping	NM_001010862	SPIN3	spindlin-3	-	57017263	57021988
ASHG19A3L0000245	17.3242	6.99338	11.1691	74.9549	60.176	52.7025	57.6588	4.27517	3.38947	3.77148	6.10317	5.84836	5.62374	5.65046	A	A	A	P	P	P	P	chr10	lincRNA-ZNF32-4	GTGCAGTTGTTGAATTGTATGATCTGCCACTGAAGTAATTAGTGTGATAATTACTTGGAT	628	DQ345519	lincRNA	-	44880497	44793037	noncoding	exon sense-overlapping	NM_001178134	CXCL12	stromal cell-derived factor 1 isoform delta	-	44872509	44880545
ASHG19A3L0000245	17.3242	6.99338	11.1691	74.9549	60.176	52.7025	57.6588	4.27517	3.38947	3.77148	6.10317	5.84836	5.62374	5.65046	A	A	A	P	P	P	P	chr10	lincRNA-ZNF32-4	GTGCAGTTGTTGAATTGTATGATCTGCCACTGAAGTAATTAGTGTGATAATTACTTGGAT	628	DQ345519	lincRNA	-	44880497	44793037	noncoding	exon sense-overlapping	NM_001033886	CXCL12	stromal cell-derived factor 1 isoform gamma	-	44871314	44880545
ASHG19A3L0000245	17.3242	6.99338	11.1691	74.9549	60.176	52.7025	57.6588	4.27517	3.38947	3.77148	6.10317	5.84836	5.62374	5.65046	A	A	A	P	P	P	P	chr10	lincRNA-ZNF32-4	GTGCAGTTGTTGAATTGTATGATCTGCCACTGAAGTAATTAGTGTGATAATTACTTGGAT	628	DQ345519	lincRNA	-	44880497	44793037	noncoding	exon sense-overlapping	NM_199168	CXCL12	stromal cell-derived factor 1 isoform alpha	-	44872509	44880545
ASHG19A3L0000245	17.3242	6.99338	11.1691	74.9549	60.176	52.7025	57.6588	4.27517	3.38947	3.77148	6.10317	5.84836	5.62374	5.65046	A	A	A	P	P	P	P	chr10	lincRNA-ZNF32-4	GTGCAGTTGTTGAATTGTATGATCTGCCACTGAAGTAATTAGTGTGATAATTACTTGGAT	628	DQ345519	lincRNA	-	44880497	44793037	noncoding	exon sense-overlapping	NM_000609	CXCL12	stromal cell-derived factor 1 isoform beta	-	44865604	44880545
ASHG19A3A052479	10.503	7.40902	17.5778	42.1204	30.2731	27.4586	21.4816	3.59191	3.45467	4.38476	5.23237	4.81286	4.64228	4.1425	A	A	P	P	P	P	P	chr15	AC105339.1	ACCAATGTGGTGCTGTCTGGCAGCATTGCCATGCACCCAAGTATCACACACAGGATGTAG	588	ENST00000448714	Ensembl	-	83395832	83395244	noncoding	intergenic
ASHG19A3A010901	48.0671	44.7305	54.731	71.5182	55.101	36.031	44.6768	5.72771	5.65946	5.95341	6.03247	5.7154	5.05409	5.26885	P	P	P	P	P	P	P	chr1		AAGACCTCCTGCTAAACGTGGTGGATTAGCATTCTGCATGTATTTTTTCTCACTTTCTTA	3838	BC028700	misc_RNA	-	212685183	212681389	noncoding	intergenic
ASHG19A3A040883	98.522	81.3824	97.9953	164.361	131.718	115.91	156.227	6.73993	6.46706	6.75872	7.27906	7.0173	6.78953	7.15136	P	P	P	P	P	P	P	chrX	RP4-551E13.2	GTGAAGAAATCATAGACTGAGATTGCTAAAAAGGTCCTCATGCCTTCAGCCCACATTGCC	1569	ENST00000430261	Ensembl	+	44328201	44325936	noncoding	intergenic
ASHG19A3L0000736	22.0239	23.0894	22.0084	27.7718	32.8865	28.0188	39.2641	4.62569	4.78574	4.69476	4.60911	4.93468	4.67367	5.06737	A	P	P	P	P	P	P	chr14	lincRNA-PELI2	TTTAAGCCCACAACTAAAGAACCACTCCTGGAAGTTTAAGCCTTGGTTTCGACTTCAAGC	547	DB309954	lincRNA	-	56799715	56799169	noncoding	intergenic
ASHG19A3A027086	12.806	10.5779	10.5125	17.6969	26.4671	22.503	33.8812	3.86089	3.83478	3.68823	3.91346	4.60884	4.34454	4.84363	A	A	A	P	P	P	P	chr5	MIR9-2	TTGCTTCCAGCTGTTCGTGGACCAATACTAGATGCCAGCAATAGAGAAATCACTGCAGTT	564	ENST00000506978	Ensembl	-	87980625	87803362	noncoding	intergenic
ASHG19A3A022005	1310.91	1406.95	1304.22	594.082	641.005	637.085	630.002	10.2319	10.326	10.2746	9.24836	9.41524	9.36942	9.2746	P	P	P	P	P	P	P	chr3		ATTCAAATAAGATTCCTACATTGCATACATCTCAAATGTCCTACCCAGTGGATCCCCACA	2533	AK095773	misc_RNA	-	182658477	182655947	noncoding	intergenic
ASHG19A3L0001715	83.3933	81.698	70.9285	107.291	112.12	124.152	108.143	6.5078	6.47175	6.3088	6.63617	6.77522	6.8957	6.59292	P	P	P	P	P	P	P	chr6	lincRNA-HEY2-1	AATTTATTACTCCAATGGCAGTTATTTCCCTTGACCCTAGGATCACTTCTCTCTGTCTCC	10926	chr6:125843301-125854226+	lincRNA	+	125854226	125843301	noncoding	intergenic
ASHG19A3L0000477	10055.6	10329.9	9444.03	7006.82	6784.34	6879	6216.24	13.0962	13.1525	13.0705	12.9082	12.8951	12.8826	12.6684	P	P	P	P	P	P	P	chr12	lincRNA-TMTC1	ATTCCATCTGTGTTTGTCATTTCTGACTGGAAAACTTCTTACTCCATACCTTGTTCGATA	106	EC575964	lincRNA	-	30748215	30748167	noncoding	intergenic
ASHG19A3A016644	85.3062	103.667	104.012	41.7048	55.9828	58.2957	52.8589	6.53769	6.80135	6.84049	5.21784	5.73706	5.7695	5.52111	P	P	P	P	P	P	P	chr2	AC079305.5	AGAGGAAGAAGTACGACATCCCCAAATACCTGTGCTGTAAGATCAGTTTTGAGCTGATGC	562	ENST00000416154	Ensembl	+	178042984	178042422	noncoding	intergenic
ASHG19A3A000299	27.7822	8.19573	11.7047	9.33053	17.5891	16.6812	22.2666	4.96033	3.55789	3.834	2.93103	3.99528	3.87661	4.19644	A	P	A	P	P	P	A	chr9	RP11-125B21.2	ACTTGCAATTACGGCATTTCCTTTGGAAATGGACATAAGAGCCTGGTGGTTGATGATGGA	423	ENST00000447278	Ensembl	-	2522019	2503279	noncoding	intergenic
ASHG19A3L0003024	345.052	286.645	264.625	704.672	567.218	674.019	667.638	8.43656	8.17203	8.10491	9.50325	9.22511	9.45699	9.36498	P	P	P	P	P	P	P	chr14	lincRNA-SIX6	TCGCATATTCCAGATGTGTTTAATAAGAAATTGCACAATGTGCCTCCTTCCGCCATCCTC	551	DB325375	lincRNA	-	61110827	61110277	noncoding	intergenic
ASHG19A3L0002481	131831	123888	126763	83839	88148	73057.9	82661.1	16.7235	16.6863	16.8112	16.6132	16.5941	16.3278	16.4697	P	P	P	P	P	P	P	chr1	lincRNA-ENO1-1	ATTGGCCCAAGTCATTGTTTTTCTCGCCTCACTTTCCACCAAGTGTCTAGAGTCATGTGA	1898	BC050642	lincRNA	-	9288096	8921062	noncoding	intronic antisense	NM_001215	CA6	carbonic anhydrase 6 precursor	+	9005921	9035148
ASHG19A3L0002481	131831	123888	126763	83839	88148	73057.9	82661.1	16.7235	16.6863	16.8112	16.6132	16.5941	16.3278	16.4697	P	P	P	P	P	P	P	chr1	lincRNA-ENO1-1	ATTGGCCCAAGTCATTGTTTTTCTCGCCTCACTTTCCACCAAGTGTCTAGAGTCATGTGA	1898	BC050642	lincRNA	-	9288096	8921062	noncoding	intron sense-overlapping	NM_024980	GPR157	probable G-protein coupled receptor 157	-	9164475	9189229
ASHG19A3L0002481	131831	123888	126763	83839	88148	73057.9	82661.1	16.7235	16.6863	16.8112	16.6132	16.5941	16.3278	16.4697	P	P	P	P	P	P	P	chr1	lincRNA-ENO1-1	ATTGGCCCAAGTCATTGTTTTTCTCGCCTCACTTTCCACCAAGTGTCTAGAGTCATGTGA	1898	BC050642	lincRNA	-	9288096	8921062	noncoding	intron sense-overlapping	NM_207420	SLC2A7	"solute carrier family 2, facilitated glucose"	-	9063358	9086404
ASHG19A3L0002481	131831	123888	126763	83839	88148	73057.9	82661.1	16.7235	16.6863	16.8112	16.6132	16.5941	16.3278	16.4697	P	P	P	P	P	P	P	chr1	lincRNA-ENO1-1	ATTGGCCCAAGTCATTGTTTTTCTCGCCTCACTTTCCACCAAGTGTCTAGAGTCATGTGA	1898	BC050642	lincRNA	-	9288096	8921062	noncoding	exon sense-overlapping	NM_001201483	ENO1	c-myc promoter-binding protein-1 isoform MBP-1	-	8921058	8931635
ASHG19A3L0002481	131831	123888	126763	83839	88148	73057.9	82661.1	16.7235	16.6863	16.8112	16.6132	16.5941	16.3278	16.4697	P	P	P	P	P	P	P	chr1	lincRNA-ENO1-1	ATTGGCCCAAGTCATTGTTTTTCTCGCCTCACTTTCCACCAAGTGTCTAGAGTCATGTGA	1898	BC050642	lincRNA	-	9288096	8921062	noncoding	exon sense-overlapping	NM_001428	ENO1	alpha-enolase isoform 1	-	8921058	8939151
ASHG19A3L0002481	131831	123888	126763	83839	88148	73057.9	82661.1	16.7235	16.6863	16.8112	16.6132	16.5941	16.3278	16.4697	P	P	P	P	P	P	P	chr1	lincRNA-ENO1-1	ATTGGCCCAAGTCATTGTTTTTCTCGCCTCACTTTCCACCAAGTGTCTAGAGTCATGTGA	1898	BC050642	lincRNA	-	9288096	8921062	noncoding	intron sense-overlapping	NM_001135585	SLC2A5	"solute carrier family 2, facilitated glucose"	-	9101426	9129887
ASHG19A3L0002481	131831	123888	126763	83839	88148	73057.9	82661.1	16.7235	16.6863	16.8112	16.6132	16.5941	16.3278	16.4697	P	P	P	P	P	P	P	chr1	lincRNA-ENO1-1	ATTGGCCCAAGTCATTGTTTTTCTCGCCTCACTTTCCACCAAGTGTCTAGAGTCATGTGA	1898	BC050642	lincRNA	-	9288096	8921062	noncoding	intron sense-overlapping	NM_003039	SLC2A5	"solute carrier family 2, facilitated glucose"	-	9097004	9129887
ASHG19A3A033220	53.605	55.855	53.0176	516.979	473.656	495.394	524.467	5.88168	5.95659	5.90828	9.04164	8.95532	8.99475	8.99675	P	P	P	P	P	P	P	chr1	RP11-48O20.4	AAGATGAACAACATGACCGGGAAGATTTCCTAATCTCACCACAGCCTGGCTCTACCTTAA	1113	ENST00000423943	Ensembl	+	159948851	159931013	noncoding	intergenic
ASHG19A3A047888	49.7108	48.6975	47.5379	85.5687	34.7507	27.3595	41.3772	5.77587	5.77187	5.7599	6.30562	5.02009	4.63701	5.15229	P	P	P	P	P	P	P	chr1	RP5-1027O11.1	AGAATCTATTGCCCTCTTTACTTCACAGTGCTACAGAGAGGATTACATGAGCCAATATTT	787	ENST00000437598	Ensembl	-	88371397	88365591	noncoding	intergenic
ASHG19A3L0002528	130.505	127.87	124.618	337.432	137.366	104.893	126.421	7.11555	7.08828	7.08889	8.37882	7.0788	6.64262	6.82486	P	P	P	P	P	P	P	chr7	lincRNA-CLIP2	AGACACTAGGAATGCCCTGTGGTTTCCTAAACTCTACTCCAGCCTCTGGTACAAACAAAT	3219	chr7:73684091-73687309+	lincRNA	+	73687309	73684091	noncoding	intergenic
ASHG19A3L0000791	33.2533	26.423	22.0265	19.3622	19.9063	19.1327	16.7077	5.21351	4.96094	4.69613	4.05292	4.18848	4.09344	3.74095	A	P	P	P	P	P	P	chr14	lincRNA-C14orf49-2	ATGTGTTAGTGAATAATTGGGGAAAGGAAATCCCATACATCTGTCAAGAGATACATTTTC	385	AV698440	lincRNA	+	95856092	95855564	noncoding	intergenic
ASHG19A3L0000989	66.9947	54.35	73.8476	74.6927	57.7957	52.4105	105.528	6.1966	5.91598	6.36856	6.09699	5.78881	5.61345	6.55434	P	P	P	P	P	P	P	chr18	lincRNA-CBLN2-2	TTTGATGAGTTTTTCTGATCTCTGCAGTCTCTCTGAGATGTCCCTCATGGCCACATGAGT	470	AW082319	lincRNA	+	68317980	68297769	noncoding	intergenic
ASHG19A3A032268	457.583	442.093	425.707	259.221	258.203	254.358	291.001	8.81898	8.767	8.75685	7.97524	8.04672	7.98054	8.09988	P	P	P	P	P	P	P	chr6	RP11-732M18.3	GGGAGAAAAATACATCACTAATGGCCAGTTTTCCATATGGTCTGCACGGGTAAAGAAAGT	424	ENST00000432358	Ensembl	+	158733390	158703294	noncoding	intergenic
ASHG19A3L0000402	19.348	17.6171	17.1584	19.47	26.4959	38.7635	31.017	4.44281	4.44865	4.35261	4.06012	4.61068	5.16393	4.71061	A	P	A	P	P	P	P	chr11	lincRNA-FCHSD2	TGGAAAAATTTGTTAGCCACAGTCATCTCAGAAGCTGCTGCTGGAGTCTGTGATTTCACC	618	BG204165	lincRNA	-	72892732	72887738	noncoding	intergenic
ASHG19A3L0001313	19.1531	18.9973	19.9096	16.095	23.6732	21.3122	20.6601	4.42749	4.54206	4.56177	3.76143	4.44054	4.25886	4.07434	A	P	P	P	P	P	P	chr3	lincRNA-IL20RB-2	TTCAAATTCCTAAGCATCAGTGTAATGGGTCCTTCTAGTGCAAGAGTCTAATCAGTTTCC	387	CV312546	lincRNA	-	136741269	136740912	noncoding	intergenic
ASHG19A3A014880	140.592	159.825	136.079	36.5577	43.861	40.2011	48.402	7.21948	7.38979	7.20835	5.0186	5.36796	5.2171	5.3852	P	P	P	P	P	P	P	chr2	AC064836.3	CTGTCCCAAGAGCTAGATGAAGCCATTATGGCGGAAGAGAGTGGTGACATCATCTCTCTC	704	ENST00000405197	Ensembl	-	203201450	203200746	noncoding	intergenic
ASHG19A3A032136	596.755	535.61	507.182	470.329	401.122	444.653	417.9	9.16709	9.01227	8.98669	8.89103	8.68814	8.82628	8.64274	P	P	P	P	P	P	P	chr6	RP11-15H7.2	TTGTTTCAGAGGCAATTTAAGGAGCAGTTTCCAGACATCAGCTAAGAATCACGTTCTCCA	1580	ENST00000381279	Ensembl	+	139982644	139981064	noncoding	intergenic
ASHG19A3A025130	205.603	182.126	181.045	108.53	61.6134	111.306	75.9169	7.73613	7.56552	7.59955	6.65364	5.88381	6.72928	6.0629	P	P	P	P	P	P	P	chr4	ZNF876P	AATTCATGCTGGAGAGAAACCCCTCATGTGAAGAACGTGTCAGAATCTTTACCTCATCCT	2621	NR_027481	RefSeq_NR	+	249771	206388	noncoding	intergenic
ASHG19A3L0002050	36.1638	35.916	29.4587	80.4732	36.9332	52.9809	29.3119	5.33149	5.36929	5.1015	6.21461	5.11043	5.63164	4.62508	P	P	P	P	P	P	P	chr8	lincRNA-GFRA2-1	GAGCTCAGATTCTCTTCGCCTCCTTTTTCTGAGATTTTCTAGAAGGAGAGGCCACTATTT	11951	chr8:20578220-20590170+	lincRNA	+	20590170	20578220	noncoding	intergenic
ASHG19A3L0002858	214.191	160.919	221.402	327.06	164.288	171.059	171.494	7.78817	7.39766	7.86	8.32804	7.35206	7.37886	7.28815	P	P	P	P	P	P	P	chrX	lincRNA-PJA1-4	AGAGCTCTCTTAGTTCCCAACCATTTTCCTGGAGCCCCCTGAGATAAATTAGTTGTGTCT	7721	chrX:68350530-68358250+	lincRNA	+	68358250	68350530	noncoding	intergenic
ASHG19A3A009982	5355.08	5283.4	5233.71	2644.77	2477.2	2605.97	2734.74	12.2186	12.2194	12.2404	11.4726	11.4128	11.4601	11.4578	P	P	P	P	P	P	P	chr17	C17orf86	CTCTGCATGCTTGTCTTTAGAGGAAGGAAATGTATTAATTGCCCAAAGTAATATATTGTG	2183	NR_027058	RefSeq_NR	+	75091067	75084724	noncoding	exon sense-overlapping	NM_001204410	SEC14L1	SEC14-like protein 1 isoform a	+	75085234	75213181
ASHG19A3A009982	5355.08	5283.4	5233.71	2644.77	2477.2	2605.97	2734.74	12.2186	12.2194	12.2404	11.4726	11.4128	11.4601	11.4578	P	P	P	P	P	P	P	chr17	C17orf86	CTCTGCATGCTTGTCTTTAGAGGAAGGAAATGTATTAATTGCCCAAAGTAATATATTGTG	2183	NR_027058	RefSeq_NR	+	75091067	75084724	noncoding	exon sense-overlapping	NM_001204408	SEC14L1	SEC14-like protein 1 isoform b	+	75084724	75213181
ASHG19A3A023911	9.59807	15.0452	8.49847	27.0863	24.0084	20.8082	29.1756	3.46645	4.25315	3.39805	4.57248	4.46216	4.22214	4.61649	A	A	A	P	P	P	P	chr4	FLJ36777	CAGGTGTCCAGAATTGGTTTATTTCCCATCTTAATTGTAGATTTACAATGTAAATGAGCC	2140	NR_027441	RefSeq_NR	-	7105103	7099150	noncoding	intergenic
ASHG19A3A031129	1534.2	1236.83	1494.68	1516.45	1120.24	1094.06	1621.31	10.4395	10.1537	10.4673	10.6626	10.2457	10.1972	10.7035	P	P	P	P	P	P	P	chr6	BC033330	TTCCCCCTTCTCCTTTTAATTGTCATGGTGGTGTCTTTCGACCCTAGCAGAGAATATGTG	2883	uc003nih.2	UCSC_knowngene	+	26574925	26569551	noncoding	intergenic
ASHG19A3L0000248	43.1657	35.0976	41.1307	71.3874	39.668	52.7189	90.8452	5.57587	5.33802	5.56015	6.02976	5.21736	5.62435	6.32587	P	P	P	P	P	P	P	chr10	lincRNA-AKR1E2-1	GGCAGTAATTGTTTGCACCAGTTCTCTGTTTGACAGCCTTGTCTCAATTTGATTATTTTG	15026	chr10:4578200-4593225+	lincRNA	+	4593225	4578200	noncoding	intergenic
ASHG19A3A023438	215.169	181.582	214.575	252.353	323.449	244.16	380.79	7.79452	7.56164	7.82347	7.9318	8.37467	7.92165	8.50141	P	P	P	P	P	P	P	chr3	RP11-6F2.6	TGTATTGGCTCTTGACAGCTCTTCAGAAGAAAATACCTCCTGCCTGTTCTGTTCAGTCCT	791	ENST00000471719	Ensembl	+	156818924	156807669	noncoding	intergenic
ASHG19A3A028235	2713.26	2660.17	2674.36	1702.69	1646.01	1028.69	1544.12	11.2506	11.228	11.2934	10.8325	10.8144	10.0985	10.6353	P	P	P	P	P	P	P	chr5	RP11-155L15.2	TGCAGAAAATGGAGAAACTAAACCAAGGAGAGTCCAGCCTCTGATGAAGCGGTAGAGAAA	295	ENST00000513734	Ensembl	+	55677902	55677607	noncoding	intergenic
ASHG19A3A023166	22.9235	21.8576	25.104	34.0706	44.1164	32.5704	59.3303	4.68773	4.71475	4.87579	4.91408	5.37685	4.90046	5.69212	A	P	P	P	P	P	P	chr3		ATGTGCACTTTTGTGATGTGGAAGGCAAATGGAAGAGAGACACCATCTCCACGTGACTTT	2775	AL713779	misc_RNA	+	128271202	128268891	noncoding	intergenic
ASHG19A3L0003391	87.5417	62.5958	68.3929	75.5323	93.047	119.672	112.917	6.57262	6.10961	6.25911	6.11654	6.49633	6.84172	6.65587	P	P	P	P	P	P	P	chr5	lincRNA-DTWD2-3	TGATTCAGAAGACAAATGGCTATCTGCTCTCTCTTTCAGTTCTATTTCTTTACTGGACCT	6628	chr5:117728562-117735189+	lincRNA	+	117735189	117728562	noncoding	intergenic
ASHG19A3L0000818	66.9436	58.7909	53.8974	91.1826	107.844	118.292	106.37	6.19507	6.02414	5.93014	6.40261	6.71445	6.8246	6.56666	P	P	P	P	P	P	P	chr15	lincRNA-RFX7	TCACATTCTGTTACCAATGAGGTGGCAGGGGTGCCTGCTCCCTGGGCACCAATGCCATTA	11151	chr15:56580983-56592133-	lincRNA	-	56592133	56580983	noncoding	intergenic
ASHG19A3L0002135	24.7049	24.2482	24.6426	25.0348	16.0254	23.7832	23.9639	4.79502	4.84922	4.84963	4.44784	3.84577	4.43011	4.31346	A	P	P	P	P	P	P	chr8	lincRNA-MRPS28	TAGATGCAAAGGATTCCACATTTTTTGGAGAACCCTTCTGTAGGGGCTCACCTTCTGTAG	536	AA999834	lincRNA	+	80942325	80830635	noncoding	natural antisense	NM_014018	MRPS28	"28S ribosomal protein S28, mitochondrial"	-	80831094	80942506
ASHG19A3L0002479	11.3126	11.4734	13.6868	26.411	49.9715	37.4412	40.8476	3.68491	3.93354	4.0399	4.53298	5.56508	5.11095	5.13272	A	A	A	P	P	P	P	chr1	lincRNA-DUSP27	TGCTTTCCACACACACATAAAAGCAAACTCATATCAGTTATGAGCAAATTAACCCATCAA	577	AW139121	lincRNA	-	167390743	167390174	noncoding	natural antisense	NM_001198786	POU2F1	"POU domain, class 2, transcription factor 1"	+	167190065	167396582
ASHG19A3L0002479	11.3126	11.4734	13.6868	26.411	49.9715	37.4412	40.8476	3.68491	3.93354	4.0399	4.53298	5.56508	5.11095	5.13272	A	A	A	P	P	P	P	chr1	lincRNA-DUSP27	TGCTTTCCACACACACATAAAAGCAAACTCATATCAGTTATGAGCAAATTAACCCATCAA	577	AW139121	lincRNA	-	167390743	167390174	noncoding	natural antisense	NM_001198783	POU2F1	"POU domain, class 2, transcription factor 1"	+	167298280	167396582
ASHG19A3L0002479	11.3126	11.4734	13.6868	26.411	49.9715	37.4412	40.8476	3.68491	3.93354	4.0399	4.53298	5.56508	5.11095	5.13272	A	A	A	P	P	P	P	chr1	lincRNA-DUSP27	TGCTTTCCACACACACATAAAAGCAAACTCATATCAGTTATGAGCAAATTAACCCATCAA	577	AW139121	lincRNA	-	167390743	167390174	noncoding	natural antisense	NM_002697	POU2F1	"POU domain, class 2, transcription factor 1"	+	167190065	167396582
ASHG19A3L0002118	19.5915	20.2242	20.4872	95.2132	92.827	103.798	97.0836	4.46132	4.62043	4.60062	6.46459	6.49142	6.62692	6.4255	A	P	P	P	P	P	P	chr8	lincRNA-DNAJC5B	AATACTTACCGACATTTCAAAGAGAAGCATATACGACAAGTACGGATCGCTGGGACTCTA	662	DN991958	lincRNA	+	66992718	66891455	noncoding	exon sense-overlapping	NM_033105	DNAJC5B	dnaJ homolog subfamily C member 5B	+	66933790	67012755
ASHG19A3A020252	525.26	450.684	520.535	486.377	604.613	424.528	658.408	8.99201	8.79282	9.01699	8.94246	9.32673	8.75274	9.34256	P	P	P	P	P	P	P	chr22	CRYBB2P1	CTGCTGCCCAGGAACCCTCCAGACCTCCCAGAGAGTGAATGAAGTGTGACTTGCAACTTG	538	ENST00000415709	Ensembl	+	25855648	25851678	noncoding	intergenic
ASHG19A3A049878	198.712	203.597	174.825	218.383	229.231	229.642	226.298	7.69393	7.71945	7.54842	7.70562	7.85514	7.82443	7.71094	P	P	P	P	P	P	P	chr13		ACACTGCACATGTATAGGTAGGCTCGCTCATGGGCATAACCCTCTAAAACACACCTTTTA	2347	AK092053	misc_RNA	-	114631817	114629488	noncoding	intergenic
ASHG19A3A035629	47.108	51.0987	44.0869	37.4744	40.3856	39.8358	45.5581	5.69965	5.83965	5.65902	5.05614	5.24407	5.20262	5.29391	P	P	P	P	P	P	P	chr8		CCCATCTTGGTCACATCTCAGAAGCAAAAAGTGACGTAAAAGACTTGAATAAAGAAATTA	2006	AK055792	misc_RNA	-	26306770	26304764	noncoding	intergenic
ASHG19A3A010156	20.1735	17.7215	13.0185	23.4187	17.8957	18.7192	13.29	4.50057	4.45654	3.97198	4.34445	4.02079	4.05932	3.35477	A	P	A	A	P	P	P	chr18		AAGGGGCTCAAAACCTAGACTTTATAAAACTGACTTTTCTTTGTCACTTTTCGGTGTTTA	3724	BC034640	misc_RNA	-	11670164	11666455	noncoding	intergenic
ASHG19A3L0001519	24.3854	18.6063	29.044	26.6718	25.7863	22.0794	23.7436	4.77662	4.5183	5.0831	4.54673	4.56791	4.31473	4.29893	A	P	P	P	P	P	P	chr4	lincRNA-CNO	ACCAACATATTACTAGCGTTCGTCTCAGGGGGGCTGGATGGGGTGATTTTGTGATTTTTT	10426	chr4:6753049-6763474-	lincRNA	-	6763474	6753049	noncoding	intergenic
ASHG19A3A016464	59.6117	47.7363	47.2945	74.3255	78.2998	95.1869	103.276	6.02874	5.74976	5.75236	6.09031	6.23613	6.49687	6.51993	P	P	P	P	P	P	P	chr2	AC144449.1	TCAAAATGTGCCAGAAATTCCAAAACAATCTCAAAGCATTAAAGGCTATGTGCACAAAGT	1022	ENST00000449714	Ensembl	+	150704747	150443709	noncoding	natural antisense	NM_015702	MMADHC	methylmalonic aciduria and homocystinuria type D	-	150426146	150444330
ASHG19A3L0000906	136.022	114.645	137.31	85.4358	179.593	203.548	211.125	7.17546	6.93533	7.22089	6.30379	7.48528	7.63986	7.60696	P	P	P	P	P	P	P	chr17	lincRNA-COX10-2	TAACGACAGCATTGACTCTGCTCCCAGTGCTTCTCATACTATGGCCAAAACAGAAACAGT	97	FN073667	lincRNA	+	13737663	13737557	noncoding	intergenic
ASHG19A3A010128	31.4794	28.6766	36.5205	43.3834	40.9935	49.0395	43.0217	5.13261	5.06865	5.3987	5.27709	5.26901	5.51591	5.21037	P	P	P	P	P	P	P	chr18	LOC339290	CAATATCTGTTGTTTCTGATGGCTCTCATAATGGCATGTTTCTTTATGTGTATCATGAGT	977	uc002kmn.1	UCSC_knowngene	-	5238525	5232874	noncoding	intergenic
ASHG19A3A010902	1459.09	1509.42	1375.47	1139.33	1263	1369.14	1415.71	10.3731	10.4241	10.3548	10.2401	10.4246	10.5242	10.4993	P	P	P	P	P	P	P	chr1	CR624623	GTGGAAAGAGTCGTGGAATAAAGGTAGCTTTGGGGATTATGACGTGAATAAATGACAGAA	838	uc001hje.2	UCSC_knowngene	-	212732013	212731175	noncoding	intergenic
ASHG19A3L0002075	192.368	229.72	186.172	337.389	67.8822	259.79	103.644	7.65027	7.87986	7.63629	8.37838	6.02893	8.01291	6.52462	P	P	P	P	P	P	P	chr8	lincRNA-KCNU1-1	TTTAAGCTTCCCTGTGTGTTGTGAGCCTGAAGTTGTGGTCTGGTGAGTTGCTGTAACAAT	488	AI379096	lincRNA	-	37025053	37006433	noncoding	intergenic
ASHG19A3L0000074	20.0536	22.5836	27.4509	46.2003	19.0292	27.2359	27.6405	4.49098	4.75492	5.00333	5.37246	4.12095	4.63201	4.52679	A	P	P	P	P	P	P	chr1	lincRNA-PROX1-1	AACCAAATTATATAATGAAGAAGAGTTTAATGAGGCCACGGGACCCTCTGGCACCTCTCA	12001	chr1:214288602-214300602-	lincRNA	-	214300602	214288602	noncoding	intergenic
ASHG19A3L0000775	5027.97	4882.32	4808.28	1523.9	1409.12	1492.08	1608.95	12.1187	12.1005	12.1216	10.67	10.6006	10.6439	10.6873	P	P	P	P	P	P	P	chr14	lincRNA-STON2-2	CTGTAGAGGTGAGGTTTTGTTTTTAGTTGTTCTACTGATTATATCCTTTTCTGAGCTATG	4302	AB208948	lincRNA	-	81893748	81726999	noncoding	exon sense-overlapping	NM_033104	STON2	stonin-2	-	81736908	81864927
ASHG19A3A023478	234.111	222.319	245.802	160.406	137.283	145.739	160.209	7.91198	7.83583	8.00132	7.2386	7.07793	7.1365	7.18643	P	P	P	P	P	P	P	chr3		TCTACACATTACAGGTTTTACTGGTTTTAATAGTACTCTGGAAGGTGGCTTGAGGTGGAG	2228	AK054953	misc_RNA	+	160983945	160981722	noncoding	intergenic
ASHG19A3A014624	41.8838	36.7954	34.1474	48.2865	59.1617	48.6562	73.6753	5.53195	5.40046	5.29953	5.43652	5.82264	5.50391	6.01581	P	P	P	P	P	P	P	chr1	RP4-740C4.4	AGCAGGTGGCTTTTCTTGAGCGCCAACATTCTGCCCGTGGGTGAGTGAGGCCCTGGCTAC	371	ENST00000420406	Ensembl	+	2362089	2357418	noncoding	intergenic
ASHG19A3L0002238	34.3937	25.7094	30.7798	25.4925	19.7578	25.1276	28.646	5.26094	4.9211	5.1614	4.4758	4.17497	4.51092	4.58832	A	P	P	P	P	M	M	chrX	lincRNA-LHFPL1	AATGCAAACATGTGGGAATGTCTCCAATCAATTTCAGTTAGGTACCTGTCGGCTTGGCTG	685	CN264150	lincRNA	-	111959674	111874798	noncoding	exon sense-overlapping	NM_178175	LHFPL1	lipoma HMGIC fusion partner-like 1 protein	-	111873878	111923375
ASHG19A3A027882	351.764	445.927	320.938	384.71	146.439	401.833	215.459	8.46405	8.77801	8.37133	8.57209	7.17665	8.66922	7.63602	P	P	P	P	P	P	P	chr5	CTD-2247C11.3	TCAACCTTCTCTCCCCAGAAAGATGTCAACACTGTGGAGATTGTGCTATGAAGATACCTG	1565	ENST00000399853	Ensembl	+	5070107	5038633	noncoding	intergenic
ASHG19A3L0002207	23.335	12.614	25.7978	46.6509	28.3929	18.9303	18.1871	4.71475	4.04291	4.91749	5.38853	4.71988	4.07477	3.87866	A	P	P	P	P	P	P	chr9	lincRNA-RXRA-2	AGGAAAATTATAACTCATCCGAGAAAATGGCTTGTACGTGCTCAGCTCTTCTCGCGGGTT	13226	chr9:137160729-137173954+	lincRNA	+	137173954	137160729	noncoding	intergenic
ASHG19A3A036488	5225.85	5176.07	5105.03	3221.98	2981.73	2910.98	3213.89	12.1796	12.1891	12.2041	11.7624	11.6848	11.6223	11.7032	P	P	P	P	P	P	P	chr8		ATTAGATGCCCAGCCTTTCTCATTCAGAGATGCCTGTATTATTATGTTATTTCGATTGCC	1288	BC042009	misc_RNA	+	28428544	28427271	noncoding	exon sense-overlapping	NM_017412	FZD3	frizzled-3 precursor	+	28351721	28431785
ASHG19A3A036488	5225.85	5176.07	5105.03	3221.98	2981.73	2910.98	3213.89	12.1796	12.1891	12.2041	11.7624	11.6848	11.6223	11.7032	P	P	P	P	P	P	P	chr8		ATTAGATGCCCAGCCTTTCTCATTCAGAGATGCCTGTATTATTATGTTATTTCGATTGCC	1288	BC042009	misc_RNA	+	28428544	28427271	noncoding	exon sense-overlapping	NM_145866	FZD3	frizzled-3 precursor	+	28351721	28431785
ASHG19A3L0002173	34.6085	26.2931	26.4117	26.9171	36.7473	34.2479	44.7446	5.27007	4.95391	4.95159	4.56278	5.10271	4.97555	5.26998	A	P	P	P	P	P	P	chr8	lincRNA-C8orf37-2	TGCACTAAGGGTCCTGTTTCCACAGCTTCGATGACAGTTAGCATCTGTACATACAAAAAA	560	DB084953	lincRNA	-	96701240	96700680	noncoding	intergenic
ASHG19A3L0001430	538.84	496.491	443.979	24387.3	23040.1	21665	25259.6	9.02392	8.91664	8.81132	14.7486	14.6823	14.5638	14.7228	P	P	P	P	P	P	P	chr4	lincRNA-BANK1-2	CAGAGTTCCAGTCATTATTGTTACATCATGTTTGCAGAAACCTTGTCTTATTTAGTGTCT	3544	AX747038	lincRNA	+	102995967	102341117	noncoding	exon sense-overlapping	NM_001127507	BANK1	B-cell scaffold protein with ankyrin repeats	+	102711763	102995969
ASHG19A3L0001430	538.84	496.491	443.979	24387.3	23040.1	21665	25259.6	9.02392	8.91664	8.81132	14.7486	14.6823	14.5638	14.7228	P	P	P	P	P	P	P	chr4	lincRNA-BANK1-2	CAGAGTTCCAGTCATTATTGTTACATCATGTTTGCAGAAACCTTGTCTTATTTAGTGTCT	3544	AX747038	lincRNA	+	102995967	102341117	noncoding	exon sense-overlapping	NM_017935	BANK1	B-cell scaffold protein with ankyrin repeats	+	102711763	102995969
ASHG19A3L0001430	538.84	496.491	443.979	24387.3	23040.1	21665	25259.6	9.02392	8.91664	8.81132	14.7486	14.6823	14.5638	14.7228	P	P	P	P	P	P	P	chr4	lincRNA-BANK1-2	CAGAGTTCCAGTCATTATTGTTACATCATGTTTGCAGAAACCTTGTCTTATTTAGTGTCT	3544	AX747038	lincRNA	+	102995967	102341117	noncoding	exon sense-overlapping	NM_001083907	BANK1	B-cell scaffold protein with ankyrin repeats	+	102734982	102995969
ASHG19A3A031012	30.0643	48.1188	38.6998	57.8388	19.3419	26.1803	146.907	5.07259	5.75847	5.47794	5.70846	4.1465	4.5723	7.06206	P	P	P	P	P	P	P	chr6	RP3-448I9.1	AACAGAGCTTGGAAGACCGACAAGTGAACAGTTGATAGTGTCCTGTTCTCCTGTTGTGTA	405	ENST00000434947	Ensembl	+	14404520	14394556	noncoding	intergenic
ASHG19A3L0000243	111.276	111.142	98.8485	128.986	42.5058	41.0101	44.3565	6.89972	6.8964	6.76774	6.9089	5.32081	5.24558	5.25672	P	P	P	P	P	P	P	chr10	lincRNA-ZNF32-1	AAGTCTTGTGATTGTTGTACCATATCCCATCTCCTTTCAAGGCTGTCAACTGGCGGAATG	11701	chr10:44737519-44749219-	lincRNA	-	44749219	44737519	noncoding	intergenic
ASHG19A3L0002622	28.3503	21.252	26.4376	24.0528	37.9527	35.1532	45.8158	4.98731	4.68175	4.95333	4.38572	5.15303	5.01441	5.30122	A	P	P	P	P	P	P	chr15	lincRNA-SPATA8-1	AATAAACCATTCAAGTGTGTGTTACTCATCTGGCCATTCAAGTGTGTGACCATCTGGAGA	720	DA646372	lincRNA	+	96916199	96915479	noncoding	intergenic
ASHG19A3L0002306	20.5321	11.8192	17.5292	12.8005	16.6259	14.2399	37.2687	4.52679	3.96904	4.38021	3.38947	3.90744	3.61754	4.99053	A	P	P	P	P	P	A	chrX	lincRNA-CXorf36-3	ATTTGTCTGCTGGTAATTTCTACTCTAACAGGCTGCTGACTTCTTGAAAGCAAGGCCTGG	616	BE884572	lincRNA	-	45579138	45578523	noncoding	intergenic
ASHG19A3L0001905	1010.27	835.526	933.365	450.602	820.316	485.057	973.326	9.87916	9.62287	9.81535	8.81871	9.78528	8.96185	9.94335	P	P	P	P	P	P	P	chr7	lincRNA-NFE2L3-3	CTTCCTCCATTATCATCCCTCTCCCGATGATAAACCACTGGAATATACCTAAGTAAAAAA	347	AI201851	lincRNA	+	25988606	25988284	noncoding	intergenic
ASHG19A3A025780	16965.2	16889.9	16490	4654.41	4686.09	4988.04	5279.37	13.826	13.8382	13.8423	12.3132	12.3364	12.3998	12.416	P	P	P	P	P	P	P	chr4	HSP90AA4P	CTTCTCTGAGCTGGCAGAAGACAAGGAGATTATAAGAAATTCTATGAGGCATTTTCTAAA	2173	ENST00000505987	Ensembl	+	88815167	88812994	noncoding	intergenic
ASHG19A3L0003380	89.1998	91.0579	88.784	72.0986	53.1827	58.7596	52.4748	6.5967	6.62473	6.62598	6.04313	5.65697	5.78207	5.50912	P	P	P	P	P	P	P	chr5	lincRNA-GNPDA1	GTATTTTGACAACTTTTTGTCTCCCATCACAGGTATGGGACCTAACTCTGACTCCCATTT	7566	chr5:141438289-141445854-	lincRNA	-	141445854	141438289	noncoding	intergenic
ASHG19A3A009654	22.5453	24.9345	21.2687	19.3117	24.3705	44.4659	40.1048	4.66081	4.88487	4.64931	4.04938	4.48405	5.36906	5.10218	A	P	P	P	P	P	P	chr17	RP11-357H14.4	CCAAATTCTCTACTAGGCCTCCGAACCAAAACGAAGGAAAATCCGTTTTCTTCTTGGGCT	566	ENST00000480386	Ensembl	+	46712294	46706036	noncoding	intergenic
ASHG19A3L0000280	123.522	160.605	131.263	94.492	188.035	207.497	200.936	7.04353	7.39499	7.16133	6.45381	7.55387	7.67088	7.53387	P	P	P	P	P	P	P	chr10	lincRNA-RPS24-6	ATTCAACAAGCATTTGGCTTTCCACCCCATGGTCACTGGGTCCTCAACACTAAAAGTCTT	1081	BM563811	lincRNA	-	79987966	79986913	noncoding	intergenic
ASHG19A3L0003006	56.5483	70.515	50.3299	81.9782	39.6864	71.2529	62.8421	5.9555	6.27311	5.83723	6.24333	5.21792	6.07834	5.77898	P	P	P	P	P	P	P	chr2	lincRNA-INO80D	AATGAGAAAACCTTGGTTTTAGAAACTACCTCCCAGACAGAAAGTAAGTATATAGGCTGG	468	AI741919	lincRNA	-	206967332	206966865	noncoding	intergenic
ASHG19A3L0001329	53.8435	35.6459	62.9145	108.387	39.5812	56.7391	39.0397	5.8886	5.3592	6.14613	6.65201	5.21453	5.73384	5.06035	P	P	P	P	P	P	P	chr3	lincRNA-P2RY1-2	ATTATTGCTAAACCTCTGTTATTTGTGTTGCTATCACATTCTGCCCCCAGCTGGGGTCGA	340	AA420706	lincRNA	-	152716869	152716537	noncoding	intergenic
ASHG19A3A007764	150.206	128.07	141.827	101.016	146.411	102.005	161.629	7.30509	7.09054	7.26715	6.54701	7.17632	6.60006	7.20049	P	P	P	P	P	P	P	chr14	MEG3	TGTCCACGGGCTCTCCTTGCATCAGGGCTAATCTCGGGCCTTGTCGAAGGAAGAGGCTGC	1621	NR_033360	RefSeq_NR	+	101327358	101292444	noncoding	intergenic
ASHG19A3L0001133	91.3	81.4342	81.7563	312.355	312.733	312.791	325.834	6.62819	6.46754	6.51203	8.25709	8.32037	8.29642	8.266	P	P	P	P	P	P	P	chr2	lincRNA-PGAP1	TTCCTATCATTGGTAACGCCCCAAGTAAAGCCTTTTTAATTAAAAATCTCTGGATGCTAT	2825	AL133087	lincRNA	-	197987457	197831742	noncoding	exon sense-overlapping	NM_153697	ANKRD44	serine/threonine-protein phosphatase 6	-	197964194	198175521
ASHG19A3L0001133	91.3	81.4342	81.7563	312.355	312.733	312.791	325.834	6.62819	6.46754	6.51203	8.25709	8.32037	8.29642	8.266	P	P	P	P	P	P	P	chr2	lincRNA-PGAP1	TTCCTATCATTGGTAACGCCCCAAGTAAAGCCTTTTTAATTAAAAATCTCTGGATGCTAT	2825	AL133087	lincRNA	-	197987457	197831742	noncoding	exon sense-overlapping	NM_001195144	ANKRD44	serine/threonine-protein phosphatase 6	-	197851385	198175521
ASHG19A3A007195	46.2107	51.315	49.2654	131.935	138.337	128.55	159.427	5.67423	5.84526	5.81159	6.94365	7.09136	6.94612	7.17999	P	P	P	P	P	P	P	chr5	FLJ42709	AACTTGCAGCTCATCTCTATTGATGGTGAAACAGTCGCAAATGGAATTCCAAGAAACATT	1184	NR_021491	RefSeq_NR	-	92916953	92746501	noncoding	intergenic
ASHG19A3A034200	160.583	143.678	145.238	138.148	183.656	186.871	205.602	7.40017	7.24599	7.29748	7.01077	7.5159	7.51438	7.56822	P	P	P	P	P	P	P	chr7		AGCAGAGTTTTCTCAAATGCAGAGTTGCCCTTGATTTTGAATGCCGTTCTCTCCCTGATC	1541	HIT000243085	H-invDB	+	36125390	36118694	noncoding	intergenic
ASHG19A3L0001806	77.3756	63.0558	54.749	85.9539	40.7223	75.186	44.2395	6.40585	6.12006	5.95392	6.31219	5.25778	6.15022	5.25348	P	P	P	P	P	M	M	chr6	lincRNA-TNFRSF21-1	AGAGGATACAAACACGAGTGGTACCTAGTTCCTGCCCTTAGGAAATCTGTCATTTATGGG	19901	chr6:47317091-47336991-	lincRNA	-	47336991	47317091	noncoding	intergenic
ASHG19A3A049080	3962.3	3932.5	3342.72	1242.93	1052.64	1240.12	1118.61	11.7811	11.7822	11.6103	10.3709	10.1553	10.3771	10.1484	M	P	P	P	P	P	P	chr12	NCRNA00173	TGGAGACTCCTATTCACCCTTCAGATCAATATCCCCCAAATAAACTCCCAGTCACTCTGG	314	ENST00000477702	Ensembl	+	116974323	116973868	noncoding	intergenic
ASHG19A3A016684	39.651	31.0415	29.6013	77.0887	35.3868	74.0938	46.1573	5.45416	5.1721	5.10949	6.14726	5.04797	6.13191	5.31334	P	P	P	P	P	P	P	chr2	AK125001	AAGGTAAATGGGATTCCCTATCCTTGTTTCCCAGTTTCGGTCATGGTATTGCTTATCCAT	1765	uc002uns.1	UCSC_knowngene	+	182264280	181988563	noncoding	intergenic
ASHG19A3L0000890	20.0711	32.9183	27.2896	80.5557	40.6346	8.99899	25.2795	4.49226	5.25348	4.99635	6.21661	5.25383	2.92642	4.39667	P	P	P	P	P	A	P	chr16	lincRNA-COTL1	TACAGCCTGTGTGAAGGGCGACTTGACAGAGGCTGTCTCCATGTCAAAGGTGCATGTCCT	670	CV407666	lincRNA	+	84579463	84578800	noncoding	intergenic
ASHG19A3L0002204	310.664	228.7	293.727	471.731	263.121	246.523	465.99	8.2918	7.87305	8.25371	8.89556	8.07291	7.9367	8.80927	P	P	P	P	P	P	P	chr9	lincRNA-NCS1	TGATGTTCTCACCCCCAATGATACTGACCGATGGGAACTCATGCACAGACACCTCCACCT	333	EG328305	lincRNA	-	133234745	133231603	noncoding	intergenic
ASHG19A3L0003451	421.464	339.384	447.635	1336.96	725.387	867.643	1597.04	8.70971	8.4063	8.82231	10.484	9.60074	9.82803	10.677	P	P	P	P	P	P	P	chr10	lincRNA-DUSP5-3	TTCTACTTCAGTCTGTATCCAGCCCCTGCACCCAGTATAATGTAGTAGAGTATTTCTCGG	27463	chr10:112147868-112175330+	lincRNA	+	112175330	112147868	noncoding	intergenic
ASHG19A3L0000375	48.9731	37.5436	46.249	61.7826	91.097	53.5261	111.81	5.7568	5.42657	5.72413	5.81055	6.45956	5.64857	6.64124	P	P	P	P	P	P	P	chr11	lincRNA-LRRC4C-3	CCCCTGTCTGTCTAATATCACTGAGTTTCCTTATAACTTCAGTTCTTAAAAGCTTCATCA	391	BX115137	lincRNA	+	37976213	37960150	noncoding	intergenic
ASHG19A3L0001687	664.4	663.164	653.791	200.909	227.147	234.669	243.111	9.30933	9.30374	9.33367	7.57909	7.83957	7.86029	7.82589	P	P	P	P	P	P	P	chr5	lincRNA-THBS4	GATCAAAAACCACTTCATTGAGGAAAGCAACCCACCAAACACAGAAGCAGAAAGAGAGCT	510	CD516039	lincRNA	+	79307717	79306992	noncoding	intergenic
ASHG19A3A015365	44.9228	45.5485	39.567	427.825	414.022	392.612	405.671	5.63296	5.68451	5.50569	8.73748	8.74072	8.62965	8.59713	P	P	P	P	P	P	P	chr2	AC013400.2	TGAAGAGTGAAAGCATGTTGAACACCAAGATGCTCTCCAAAGATGGAGTCCTTCTCTTCT	2239	ENST00000438692	Ensembl	+	20077154	20068620	noncoding	intergenic
ASHG19A3A015325	664.641	680.602	662.836	649.081	909.469	975.709	1044.4	9.31009	9.33892	9.35379	9.37936	9.94107	10.0195	10.0473	P	P	P	P	P	P	P	chr2	AC099344.4	GAACCTTCTCAGCTTATTCAGAGAGGCTTCTTCTTCCTATTTAGTCTCCCTCTGGCTTTC	499	ENST00000417473	Ensembl	+	11542372	11534106	noncoding	intergenic
ASHG19A3L0001152	3665.34	3685.7	3372.01	2825.69	3156.12	3071.97	3132.31	11.6732	11.6913	11.6234	11.5694	11.7733	11.7017	11.6674	P	P	P	P	P	P	P	chr2	lincRNA-WDFY1	TGAAGTTACTGAGTTTGAGGAATGGCAAATTAAATTTGCCTAACCCCCAAAACAAATGAA	836	CD514437	lincRNA	+	224717876	224717164	noncoding	intergenic
ASHG19A3A018943	201.993	159.221	148.82	239.287	228.529	257.188	261.303	7.71539	7.38349	7.33064	7.85023	7.8487	7.9964	7.93423	P	P	P	P	P	P	P	chr21		GTTCAGTCCTTGAATAAATAGCACATTTTTGCATGTATTTTGTAGAGTGGCATATGCTTC	2082	CR615276	misc_RNA	-	44777510	44775428	noncoding	intergenic
ASHG19A3L0003570	24.2944	24.12	26.8233	17.7253	41.8879	51.745	53.816	4.7725	4.84256	4.97306	3.91553	5.3004	5.59475	5.54669	A	P	P	P	P	P	P	chr3	lincRNA-SOX2-6	CCAGAGACCCACTTGTCCATCTCATTATTGTTCTTTCAAAAGACTAATTGTGTCAGTTAT	8481	chr3:181954931-181963411-	lincRNA	-	181963411	181954931	noncoding	intergenic
ASHG19A3A014169	84.5517	130.373	79.5021	152.446	59.4271	51.5222	117.923	6.52521	7.11435	6.47375	7.16002	5.83004	5.58676	6.72474	P	P	P	P	P	P	P	chr2	AC019100.3	TACTAGAATGTTCTCTGCCATCCACTAAGCATTGAATCCCTCCAGACACTGTTACAACAG	611	ENST00000445083	Ensembl	-	108834297	108784203	noncoding	intergenic
ASHG19A3L0002436	61.4575	78.6564	73.7246	289.134	95.4386	76.3543	104.561	6.06792	6.42094	6.36698	8.13739	6.53333	6.17059	6.53944	P	P	P	P	P	P	P	chr9	lincRNA-MLLT3-1	TTTTGCTAGTCTTGTCTCTGTTCCGCCTGCTGTGGCAATCAGCTTTTGCAAATACTGTCA	13347	chr9:20028084-20041430+	lincRNA	+	20041430	20028084	noncoding	intergenic
ASHG19A3A029629	21.0399	20.421	20.6306	177.339	157.745	139.804	156.731	4.55993	4.63443	4.60992	7.39543	7.2911	7.07299	7.15608	A	P	P	P	P	P	P	chr6	LOC285830	TGCCCTGTAATGAAGTCATGTGTGCACATATCATCACTTCTGCATGCAGTCTCATGGGAA	1914	NR_026972	RefSeq_NR	-	29716826	29694377	noncoding	natural antisense	NM_001098479	HLA-F	"HLA class I histocompatibility antigen, alpha"	+	29691116	29695073
ASHG19A3L0003157	20.1648	12.4619	16.534	38.7307	24.0875	14.2577	21.7174	4.49955	4.02843	4.3071	5.10924	4.46741	3.62072	4.16003	A	P	A	P	P	P	P	chr8	lincRNA-LZTS1-3	GCACCCCTACGGTGCTACTGATTTTTGATGATTCAATTTGTCTTGTGTTTTGTGATAATT	48078	chr8:21198827-21246904-	lincRNA	-	21246904	21198827	noncoding	intergenic
ASHG19A3L0000175	46.3588	42.0119	38.3786	50.6952	42.3099	38.2162	60.6064	5.67816	5.57696	5.46675	5.51825	5.31557	5.14214	5.72138	P	P	P	P	P	P	P	chr1	lincRNA-SAMD13	GTTTTCCTCCTTTAAAGAGCCTGTAGTTGAGTTCCAGAGACCTTATCCTGGAGAACAGTG	11501	chr1:84714587-84726087+	lincRNA	+	84726087	84714587	noncoding	intergenic
ASHG19A3L0000369	34.0617	27.1103	28.8775	34.5168	38.3468	35.844	36.245	5.24947	4.99552	5.07415	4.93457	5.16831	5.04568	4.95249	P	P	P	P	P	P	P	chr11	lincRNA-APIP	GATGGAAAATACAAACACTCAGTATTTATGGCTTCTATGCTGCATGTCACCTTAACATAT	822	CD656032	lincRNA	+	34796148	34795450	noncoding	intergenic
ASHG19A3L0000485	3407.08	2431.71	3398.52	1199.83	2412.01	1084.08	2601.34	11.5742	11.1086	11.635	10.312	11.374	10.1805	11.3923	P	P	P	P	P	P	P	chr12	lincRNA-ALG10B-1	CAAGTTACTCCCCTTCCCTAAAGTAGCTACTGTTAATCTTTTGTTGTGTGTTCTTAAAAT	28526	chr12:38784383-38812908-	lincRNA	-	38812908	38784383	noncoding	intergenic
ASHG19A3A044647	339.657	385.796	378.914	298.208	612.789	646.951	668.748	8.41504	8.58104	8.61056	8.18558	9.34781	9.39437	9.36746	P	P	P	P	P	P	P	chr10	AK124226	TGTCCTCATGTTAACCCCCTTATGCTGTCTCCTCCAATAATGCATGTGGTTTGGTCTCTA	3086	uc001lkg.1	UCSC_knowngene	+	130115990	129979399	noncoding	intergenic
ASHG19A3L0001002	42.2468	45.259	65.1599	33.1489	65.7435	76.237	84.9917	5.54514	5.67645	6.19138	4.87018	5.97955	6.16778	6.23103	P	P	P	P	P	P	P	chr18	lincRNA-ZNF516-2	TGTATCTCCTTTTCAATCTGCCTAAAATGACAGCTGGGCTTCCGACAGTGGGTTTCTTAT	815	DA829587	lincRNA	+	73179640	73178827	noncoding	intergenic
ASHG19A3A016945	70.4521	71.0367	52.6318	63.0286	27.2464	58.9248	41.5798	6.27187	6.28341	5.89831	5.84054	4.65417	5.78661	5.15927	P	P	P	P	P	P	P	chr2	AX747067	CACAGGAAAAGGAATTCAGGGGCTGCTTCAGAATCCCATCTTTGCCAGATACGTTAACTT	2348	uc002vga.1	UCSC_knowngene	+	217081397	217079049	noncoding	intergenic
ASHG19A3L0001635	36.8119	42.2302	39.5845	44.5397	11.6714	30.1102	18.3894	5.35426	5.58525	5.50673	5.32091	3.32999	4.78574	3.89502	P	P	P	P	A	P	P	chr5	lincRNA-SUB1-2	ACAGGCACGAGTGACTCCAAAGAGCCCTTGTTTTCTAGCAGCCACAGAAAGCATGTGTGA	496	BU588258	lincRNA	+	32535764	32535294	noncoding	intergenic
ASHG19A3L0002546	98.4486	51.7555	100.086	115.039	40.88	33.9087	41.8298	6.73903	5.85613	6.78629	6.73468	5.26455	4.96003	5.16861	P	P	P	P	P	P	P	chr7	lincRNA-NAA38	ACACTTACATTCAGTACCAGGATTGTGTTAACTCCTATGCCCTCATAATATAGTCCAGAG	2697	chr7:117584264-117586960+	lincRNA	+	117586960	117584264	noncoding	intergenic
ASHG19A3L0003127	25.4386	17.1284	25.5156	39.9254	26.3529	30.6294	35.0676	4.83937	4.41587	4.89957	5.15185	4.60166	4.81077	4.89934	A	P	P	P	P	P	P	chr3	lincRNA-FLNB	CACGGGGTGCTGCAGCCTCTATTCCATTCAGCAAACTCTGATGCACACCTACTATGTGCC	7361	chr3:58165366-58172726-	lincRNA	-	58172726	58165366	noncoding	intergenic
ASHG19A3A015535	41.0216	40.725	41.8538	34.4362	52.5952	40.8235	51.3909	5.50053	5.53324	5.58525	4.93095	5.63914	5.23797	5.47478	P	P	P	P	P	P	P	chr2	C2orf58	GGCACTGGTGACTTTTGAGCCATCAATCATCCTTTCCTAACACATGAATCTTTTGGAAAA	1776	NR_027252	RefSeq_NR	+	38408991	38358246	noncoding	intergenic
ASHG19A3L0003199	32.7751	28.173	26.9574	56.4808	88.7816	48.7416	123.24	5.19096	5.04528	4.98005	5.67255	6.42195	5.5063	6.79117	P	P	P	P	P	P	P	chr8	lincRNA-ANGPT1-2	CCCTGTCTCAATATAAGCAATGCATTAATACATGTGAGTGACTGGATATAATCTAAACAG	6268	chr8:108001782-108008049+	lincRNA	+	108008049	108001782	noncoding	intergenic
ASHG19A3A034234	2126.56	1855.94	2359.8	1265.42	2683.27	1510.78	3420.14	10.9104	10.7198	11.1167	10.3991	11.5358	10.6645	11.7951	P	P	P	P	P	P	P	chr7	AC004987.7	TTTTCTCAACACGGCCTCCTAGTCTCCTTCCCGCTTGGGCATCTGTTTTTCTTATATAGA	3049	ENST00000340510	Ensembl	+	39832691	39773230	noncoding	intergenic
ASHG19A3L0001427	86.6405	96.3475	74.9309	122.272	105.104	105.263	111.671	6.55653	6.7042	6.38666	6.83392	6.67483	6.64777	6.63969	P	P	P	P	P	P	P	chr4	lincRNA-EMCN	GAGGCAGCTAATAATTCACTTGTTGTTACTACAACAAAACCATCTATAACAACACCAAAC	571	DA254994	lincRNA	-	101801283	101401128	noncoding	exon sense-overlapping	NM_001159694	EMCN	endomucin isoform 2	-	101316497	101439250
ASHG19A3L0001427	86.6405	96.3475	74.9309	122.272	105.104	105.263	111.671	6.55653	6.7042	6.38666	6.83392	6.67483	6.64777	6.63969	P	P	P	P	P	P	P	chr4	lincRNA-EMCN	GAGGCAGCTAATAATTCACTTGTTGTTACTACAACAAAACCATCTATAACAACACCAAAC	571	DA254994	lincRNA	-	101801283	101401128	noncoding	exon sense-overlapping	NM_016242	EMCN	endomucin isoform 1	-	101316497	101439250
ASHG19A3L0002017	126.452	181.041	245.11	70.1501	181.043	211.204	201.354	7.0738	7.55696	7.99767	6.00247	7.49601	7.69679	7.53603	P	P	P	M	M	P	M	chr8	lincRNA-ST3GAL1-2	GACACCTTTTCCCCATCAGACTGAAGGACAAATTTTGTTCGTATTTCAGCATAATTTATT	15551	chr8:135201218-135216768-	lincRNA	-	135216768	135201218	noncoding	intergenic
ASHG19A3L0001865	33.6917	28.4086	42.5145	44.2183	55.9923	39.6579	49.7949	5.23266	5.05632	5.60762	5.3095	5.73734	5.1968	5.42582	P	P	P	P	P	P	P	chr7	lincRNA-UNCX	GCTGCAATGGAAACCCCAGGCTCTGAACTCAAGTAGACCTGGATTTGAATCCCGACGCAG	18151	chr7:1348449-1366599-	lincRNA	-	1366599	1348449	noncoding	intergenic
ASHG19A3L0002975	7723.47	7909.61	7886.19	11629.2	12330.9	13191.8	13085.6	12.7219	12.7656	12.8106	13.6673	13.7794	13.8486	13.7577	P	P	P	P	P	P	P	chr17	lincRNA-GPRC5C	CCTGGATCTTGCTCCTCTGTGAGGAACAAGGGTGCCTAATAAATACATTTCTGCTTTATT	2227	AK097341	lincRNA	+	72443566	72130786	noncoding	intron sense-overlapping	NM_000999	RPL38	60S ribosomal protein L38	+	72199794	72206019
ASHG19A3L0002975	7723.47	7909.61	7886.19	11629.2	12330.9	13191.8	13085.6	12.7219	12.7656	12.8106	13.6673	13.7794	13.8486	13.7577	P	P	P	P	P	P	P	chr17	lincRNA-GPRC5C	CCTGGATCTTGCTCCTCTGTGAGGAACAAGGGTGCCTAATAAATACATTTCTGCTTTATT	2227	AK097341	lincRNA	+	72443566	72130786	noncoding	exon sense-overlapping	NM_022036	GPRC5C	G-protein coupled receptor family C group 5	+	72427666	72443568
ASHG19A3L0002975	7723.47	7909.61	7886.19	11629.2	12330.9	13191.8	13085.6	12.7219	12.7656	12.8106	13.6673	13.7794	13.8486	13.7577	P	P	P	P	P	P	P	chr17	lincRNA-GPRC5C	CCTGGATCTTGCTCCTCTGTGAGGAACAAGGGTGCCTAATAAATACATTTCTGCTTTATT	2227	AK097341	lincRNA	+	72443566	72130786	noncoding	intronic antisense	NM_001080466	BTBD17	BTB/POZ domain-containing protein 17 precursor	-	72352554	72357958
ASHG19A3L0002975	7723.47	7909.61	7886.19	11629.2	12330.9	13191.8	13085.6	12.7219	12.7656	12.8106	13.6673	13.7794	13.8486	13.7577	P	P	P	P	P	P	P	chr17	lincRNA-GPRC5C	CCTGGATCTTGCTCCTCTGTGAGGAACAAGGGTGCCTAATAAATACATTTCTGCTTTATT	2227	AK097341	lincRNA	+	72443566	72130786	noncoding	exon sense-overlapping	NM_018653	GPRC5C	G-protein coupled receptor family C group 5	+	72429835	72443568
ASHG19A3L0002975	7723.47	7909.61	7886.19	11629.2	12330.9	13191.8	13085.6	12.7219	12.7656	12.8106	13.6673	13.7794	13.8486	13.7577	P	P	P	P	P	P	P	chr17	lincRNA-GPRC5C	CCTGGATCTTGCTCCTCTGTGAGGAACAAGGGTGCCTAATAAATACATTTCTGCTTTATT	2227	AK097341	lincRNA	+	72443566	72130786	noncoding	intron sense-overlapping	NM_032646	TTYH2	protein tweety homolog 2 isoform 1	+	72209695	72258157
ASHG19A3L0002975	7723.47	7909.61	7886.19	11629.2	12330.9	13191.8	13085.6	12.7219	12.7656	12.8106	13.6673	13.7794	13.8486	13.7577	P	P	P	P	P	P	P	chr17	lincRNA-GPRC5C	CCTGGATCTTGCTCCTCTGTGAGGAACAAGGGTGCCTAATAAATACATTTCTGCTTTATT	2227	AK097341	lincRNA	+	72443566	72130786	noncoding	intron sense-overlapping	NM_001035258	RPL38	60S ribosomal protein L38	+	72199794	72206019
ASHG19A3L0002975	7723.47	7909.61	7886.19	11629.2	12330.9	13191.8	13085.6	12.7219	12.7656	12.8106	13.6673	13.7794	13.8486	13.7577	P	P	P	P	P	P	P	chr17	lincRNA-GPRC5C	CCTGGATCTTGCTCCTCTGTGAGGAACAAGGGTGCCTAATAAATACATTTCTGCTTTATT	2227	AK097341	lincRNA	+	72443566	72130786	noncoding	intron sense-overlapping	NM_181790	GPR142	probable G-protein coupled receptor 142	+	72363644	72368739
ASHG19A3L0002975	7723.47	7909.61	7886.19	11629.2	12330.9	13191.8	13085.6	12.7219	12.7656	12.8106	13.6673	13.7794	13.8486	13.7577	P	P	P	P	P	P	P	chr17	lincRNA-GPRC5C	CCTGGATCTTGCTCCTCTGTGAGGAACAAGGGTGCCTAATAAATACATTTCTGCTTTATT	2227	AK097341	lincRNA	+	72443566	72130786	noncoding	intron sense-overlapping	NM_023036	DNAI2	"dynein intermediate chain 2, axonemal isoform 1"	+	72270385	72311023
ASHG19A3L0002975	7723.47	7909.61	7886.19	11629.2	12330.9	13191.8	13085.6	12.7219	12.7656	12.8106	13.6673	13.7794	13.8486	13.7577	P	P	P	P	P	P	P	chr17	lincRNA-GPRC5C	CCTGGATCTTGCTCCTCTGTGAGGAACAAGGGTGCCTAATAAATACATTTCTGCTTTATT	2227	AK097341	lincRNA	+	72443566	72130786	noncoding	intron sense-overlapping	NM_001172810	DNAI2	"dynein intermediate chain 2, axonemal isoform 2"	+	72270385	72311023
ASHG19A3L0002975	7723.47	7909.61	7886.19	11629.2	12330.9	13191.8	13085.6	12.7219	12.7656	12.8106	13.6673	13.7794	13.8486	13.7577	P	P	P	P	P	P	P	chr17	lincRNA-GPRC5C	CCTGGATCTTGCTCCTCTGTGAGGAACAAGGGTGCCTAATAAATACATTTCTGCTTTATT	2227	AK097341	lincRNA	+	72443566	72130786	noncoding	intron sense-overlapping	NM_052869	TTYH2	protein tweety homolog 2 isoform 2	+	72244504	72258157
ASHG19A3L0002975	7723.47	7909.61	7886.19	11629.2	12330.9	13191.8	13085.6	12.7219	12.7656	12.8106	13.6673	13.7794	13.8486	13.7577	P	P	P	P	P	P	P	chr17	lincRNA-GPRC5C	CCTGGATCTTGCTCCTCTGTGAGGAACAAGGGTGCCTAATAAATACATTTCTGCTTTATT	2227	AK097341	lincRNA	+	72443566	72130786	noncoding	intron sense-overlapping	NM_153209	KIF19	kinesin-like protein KIF19	+	72322350	72351959
ASHG19A3A048136	21.5945	14.12	28.0873	21.9969	34.3588	20.74	34.4668	4.59432	4.17577	5.03529	4.24709	5.00135	4.21709	4.8738	A	P	P	P	P	P	P	chr1	RP11-47K11.3	AGGGCAAACCAAAACCCTGTTCAGTAAGAAATACGGTGTGGCCTCATCAGATAAACTCCT	1081	ENST00000361447	Ensembl	-	92001222	92000141	noncoding	intergenic
ASHG19A3L0002529	15.1411	9.38278	15.8284	16.0885	17.2719	23.2556	19.1081	4.09055	3.7011	4.24709	3.76043	3.96421	4.39206	3.95082	A	A	A	P	P	P	P	chr13	lincRNA-UBL3-2	TATAGGGTGGGTGGGCACATTTCCAACAAACTTACCCAGTTCCAAAATTTGCTGTTTTTT	11854	chr13:30626063-30637916-	lincRNA	-	30637916	30626063	noncoding	intergenic
ASHG19A3A051743	5	5.19296	5	45.8557	46.8063	52.0851	42.1204	2.37766	2.32973	2.39437	5.36349	5.46786	5.60352	5.17769	A	A	A	P	P	P	P	chr14	BX247990	ATCAATGGCCCTAGGATCCAGAATGCCACAAACAATGGAGCAAGAATCAGATCTGTGTGT	1858	uc001yfd.1	UCSC_knowngene	+	96223116	96181819	noncoding	intergenic
ASHG19A3L0002813	13.5743	13.2017	16.578	19.8531	20.527	16.7446	32.1658	3.93845	4.09593	4.30991	4.09066	4.23524	3.88171	4.7681	A	A	A	P	P	P	P	chrX	lincRNA-MID1IP1-1	TGTCATCTTTGCAGATCCATTTGTGATTCCTTGATGCTGTAATTACTGCGGCTCCACTCC	6986	chrX:39589029-39596014-	lincRNA	-	39596014	39589029	noncoding	intergenic
ASHG19A3A014842	33.2725	32.8565	42.827	34.5746	50.9957	35.1574	60.7631	5.21437	5.25121	5.61885	4.93709	5.59114	5.01478	5.72397	P	P	P	P	P	P	P	chr2	AC007163.6	AAGTCTTTGGGTTTAAAACATTTTTTGGATGAGAGGAGGCTGGATGTTCCTGGCTCCTGG	841	ENST00000447972	Ensembl	-	201676893	201645217	noncoding	natural antisense	NM_014670	BZW1	basic leucine zipper and W2 domain-containing	+	201676646	201688560
ASHG19A3A017424	17.6314	21.5228	18.2735	42.7356	34.8702	33.5518	32.129	4.30318	4.69707	4.43859	5.25294	5.02587	4.94243	4.76582	A	P	P	P	P	P	P	chr20		CAAGAAAAAGAATATGGGGGCCCAGAGTGCTTGTGTCTGGAGCAGGTCACAGAATTAAAT	1665	BC004382	NRED	-	19738681	19737034	noncoding	intergenic
ASHG19A3A034487	116.938	98.0719	118.538	70.1421	162.551	170.049	185.704	6.96891	6.72844	7.01896	6.00232	7.33664	7.37031	7.40972	P	P	P	P	P	P	P	chr7	RP11-458F8.1	AGCCAAAGGTCCACCCCTTTTTTCCAGTCTCAAGCTGAAGATCTTTATGTAGAAGGCCTT	298	ENST00000419595	Ensembl	+	66323123	66313482	noncoding	intergenic
ASHG19A3L0000967	159.431	185.912	165.288	546.208	1022.44	915.046	969.261	7.38779	7.59406	7.46875	9.12429	10.1153	9.91516	9.9345	P	P	P	P	P	P	P	chr18	lincRNA-LIPG-2	TTAGTCCTGACCACCCTTCCTTCTCTTGGAGGAAGACTTTCCTTCATTCAGGTACTTACA	11801	chr18:47271277-47283077-	lincRNA	-	47283077	47271277	noncoding	intergenic
ASHG19A3L0001357	5	10.3288	5	129.338	57.7997	30.1626	62.3081	2.37766	3.80989	2.39437	6.91227	5.78891	4.78799	5.76566	A	A	A	P	P	P	P	chr3	lincRNA-MASP1	CAGGCTCTGCACAGTCTGTCAGGATATTCCAGTGATCAGTAGAAAATACAAATCATTTAA	17326	chr3:187039181-187056506-	lincRNA	-	187056506	187039181	noncoding	intergenic
ASHG19A3A007566	28.1296	46.3719	38.6583	18.9258	8.35392	5	6.41315	4.97665	5.70897	5.4766	4.01883	2.86739	2.32995	2.46734	P	P	P	A	A	A	P	chr4	FLJ39653	CCTTAGGGAGCTCCCGGTCCTGCAGGTTTTCACTATTTATTTATGACAAATATTCCACAT	2547	NR_027696	RefSeq_NR	+	16259810	16228285	noncoding	bidirectional	NM_153365	TAPT1	transmembrane anterior posterior transformation	-	16162127	16228161
ASHG19A3L0002743	41.8139	31.4165	44.2115	59.9347	41.0809	34.7654	77.0814	5.529	5.1898	5.66281	5.76488	5.27361	4.99683	6.08416	P	P	P	P	P	P	P	chr11	lincRNA-BUD13-1	TTCTAACTTAGCAAATGCCACCTTTTCAGATCGGGAGCTTCTTTGCAGTCTCATTCCTCA	367	AW242585	lincRNA	+	115994807	115994454	noncoding	intergenic
ASHG19A3L0000768	50.4249	31.6171	47.6577	76.3939	114.006	63.3747	127.143	5.79503	5.19665	5.764	6.13357	6.79931	5.89831	6.83399	P	P	P	P	P	P	P	chr14	lincRNA-FLVCR2	TTTGGATTCTAAGTTGAAATGAGCCCTATTCCTTTGCAGCTCTTAGGAATCAGCTTGCCT	10251	chr14:76020622-76030872+	lincRNA	+	76030872	76020622	noncoding	intergenic
ASHG19A3L0002473	19.4716	14.1164	21.2398	32.3885	43.9281	34.9665	50.4482	4.4518	4.1752	4.64725	4.83829	5.36962	5.00597	5.44715	A	P	P	P	P	P	P	chr1	lincRNA-NBPF1	TTGAGGCTCTACTTCTGTATCCAGGTCAGACCCAGAATTCCACGGTGCTGTATAAATGCT	255	CV366145	lincRNA	-	17245926	17245671	noncoding	intergenic
ASHG19A3L0001645	85.6225	76.4733	93.8056	73.5359	114.767	125.412	125.877	6.54274	6.38291	6.69773	6.0746	6.80872	6.91215	6.81881	P	P	P	P	P	P	P	chr5	lincRNA-ADAMTS16-4	AAGATACTTCTAAGGTGTGAGGCCACAGCTCTGAGGCTCCTGGGTGTCATCACCTTCTTG	11776	chr5:3737400-3749175+	lincRNA	+	3749175	3737400	noncoding	intergenic
ASHG19A3L0000807	133.701	130.035	115.377	104.069	117.577	114.604	129.731	7.14972	7.11016	6.98149	6.59111	6.84632	6.77198	6.86318	P	P	P	P	P	P	P	chr15	lincRNA-TMCO5A-3	CTTCTAAGCTTTTTCTACATTAAATCCAGATACTCAATCTTCTCCCAGTGATTGAAGGAT	20801	chr15:38053658-38074458+	lincRNA	+	38074458	38053658	noncoding	intergenic
ASHG19A3A050755	62.087	73.7198	68.0891	59.879	69.4455	79.7843	67.6117	6.08464	6.33178	6.25328	5.76346	6.0629	6.23473	5.88689	P	P	P	P	P	P	P	chr1	AL592494.4	GCATCAGGTTACTCACCTGTCTTGGAGCTTATCAACGATCTACTTTACATCTCATATTTG	369	ENST00000437523	Ensembl	-	121252295	121236176	noncoding	intergenic
ASHG19A3L0002114	29.5725	34.8766	30.2889	52.3707	5	40.8109	14.5157	5.04927	5.32951	5.14136	5.56637	2.33128	5.23745	3.50232	P	P	P	A	A	P	P	chr8	lincRNA-ARMC1-4	CTTCTGTCCCCATTTGTAATTTCTTTGTGGCAATTGTACAGGGACAATCTTAAGGTATTT	11026	chr8:66218046-66229071+	lincRNA	+	66229071	66218046	noncoding	intergenic
ASHG19A3A029345	35.5469	41.8258	40.0637	41.4894	42.5211	41.2822	49.6182	5.309	5.57005	5.52367	5.20878	5.32126	5.25475	5.42078	P	P	P	P	P	P	P	chr6		TGTGTTTAGGTGTCATAACTAGGCTAGGTTTGGGTCCCAGAAAGTGCTAGCCTTACTGTA	3858	AK127220	misc_RNA	-	4014779	4010921	noncoding	intergenic
ASHG19A3L0003232	95.345	102.815	113.251	202.298	134.155	113.573	120.04	6.69237	6.79065	6.9559	7.59065	7.04398	6.75685	6.75384	P	P	P	P	P	P	P	chr22	lincRNA-SREBF2	CAGGGCGCTGACAGAGCTTCTGAAGCAGCCGGGCCCCCAGGAGCCACTGCCTCCCACCCT	486	AI763350	lincRNA	-	42310570	42307296	noncoding	intergenic
ASHG19A3L0000896	165.387	110.098	172	187.748	150.483	108.01	127.458	7.44255	6.88328	7.52612	7.48026	7.21687	6.68519	6.83767	P	P	P	P	P	P	P	chr16	lincRNA-LOC100506581-4	ATGCATTTCCCCTTCTTTTTTATAGAGAGGGAGGTTGCCAGCTGCCTTGAAGAAAAGGGA	277	AW182066	lincRNA	+	86670751	86669933	noncoding	intergenic
ASHG19A3L0001793	141.628	127.332	152.903	174.365	298.41	183.48	340.204	7.22984	7.08092	7.36913	7.36564	8.25392	7.48412	8.32933	P	P	P	P	P	P	P	chr6	lincRNA-PIM1	AGAGGGAAAATACAGGCCTCAGTCCCAAGTCTGCTCCCAACTCTGGGTCCTTGAGTAATT	605	AL711564	lincRNA	+	37085729	37085130	noncoding	intergenic
ASHG19A3L0001418	46.434	28.8766	34.3387	40.247	49.1393	40.2175	67.857	5.68005	5.07822	5.30765	5.16328	5.53843	5.21761	5.89263	P	P	P	P	P	P	P	chr3	lincRNA-SHQ1-3	TTCTAAAGCACAGATGGGAAGAAATGGATCTTGTCTACGATCTACCCTGTACCCAACTGG	526	BX104557	lincRNA	+	72665344	72663304	noncoding	intergenic
ASHG19A3L0000464	14.2835	13.7949	22.7803	23.3384	31.9882	23.5503	41.7769	4.01394	4.1499	4.73933	4.34046	4.89593	4.41369	5.16634	A	A	P	P	P	P	P	chr12	lincRNA-PDE3A	CCATTCCTGCATGTGTCTAACCTGAACTTCGAATTTCTTACACATTCACTGGAGAACATT	896	BI088304	lincRNA	+	19766002	19765132	noncoding	intergenic
ASHG19A3L0002275	152.274	98.9665	176.964	48.7256	267.586	83.0043	273.162	7.32545	6.73921	7.56734	5.45362	8.09828	6.28915	8.003	P	P	P	P	P	P	P	chrX	lincRNA-CXorf66-1	AAATAGACAAGAAATGCCTGCCGGTGAACAATGCCATATCTATGCCATATGCAGGACTGG	148	CV340376	lincRNA	+	138959155	138959008	noncoding	intergenic
ASHG19A3A000493	307.602	294.953	300.805	22.4504	50.1412	65.2836	62.0982	8.27727	8.20804	8.28533	4.27769	5.57029	5.94542	5.76016	P	P	P	P	P	P	P	chr4	RP11-792D21.2	GTTGTATGTTTACCCTACCACAAAGATACAGAATTCTGGAGGAAAGTGGCTCTGGGAATT	2095	ENST00000512322	Ensembl	+	79603853	79567370	noncoding	intergenic
ASHG19A3A000389	157.479	189.317	159.589	328.086	123.506	267.808	185.76	7.37018	7.61685	7.42157	8.33175	6.91989	8.06161	7.41003	P	P	P	P	P	P	P	chr3	RP11-393B14.1	ACACTGCCTGAGCCCGCTGCTGTTGCCAAGagtctcacttcatcaccatgctggagtgca	1490	ENST00000471496	Ensembl	+	183173801	183165395	noncoding	intergenic
ASHG19A3L0001770	21.9814	30.6847	19.7245	135.107	74.0746	72.0819	52.7185	4.62261	5.15636	4.55021	6.97866	6.1549	6.09562	5.51655	M	P	P	P	P	P	P	chr6	lincRNA-DLL1-1	TTACGGTATGCCCTTAGTCTGGCTGAGTGAAACCAACCAGGGCGGAGGAAGCATTCCGAT	416	AA317289	lincRNA	+	170241810	170241398	noncoding	intergenic
ASHG19A3A021600	149.739	46.2949	140.977	215.496	113.937	112.105	129.495	7.3006	5.7065	7.25759	7.68284	6.7978	6.73632	6.86061	P	P	P	P	P	P	P	chr3	RP11-933H2.4	TATTCATTCTCCTGCTGAAGTACATTTCAGGTTGTTGCTATTCCTCTGCTGATCCCCCTC	1978	ENST00000502521	Ensembl	-	131100319	131043935	noncoding	bidirectional	NM_152395	NUDT16	U8 snoRNA-decapping enzyme isoform 2	+	131100608	131107674
ASHG19A3A021600	149.739	46.2949	140.977	215.496	113.937	112.105	129.495	7.3006	5.7065	7.25759	7.68284	6.7978	6.73632	6.86061	P	P	P	P	P	P	P	chr3	RP11-933H2.4	TATTCATTCTCCTGCTGAAGTACATTTCAGGTTGTTGCTATTCCTCTGCTGATCCCCCTC	1978	ENST00000502521	Ensembl	-	131100319	131043935	noncoding	bidirectional	NM_001171905	NUDT16	U8 snoRNA-decapping enzyme isoform 3	+	131100514	131107674
ASHG19A3A021600	149.739	46.2949	140.977	215.496	113.937	112.105	129.495	7.3006	5.7065	7.25759	7.68284	6.7978	6.73632	6.86061	P	P	P	P	P	P	P	chr3	RP11-933H2.4	TATTCATTCTCCTGCTGAAGTACATTTCAGGTTGTTGCTATTCCTCTGCTGATCCCCCTC	1978	ENST00000502521	Ensembl	-	131100319	131043935	noncoding	intronic antisense	NM_001146003	NEK11	serine/threonine-protein kinase Nek11 isoform 3	+	130745693	131069309
ASHG19A3A021600	149.739	46.2949	140.977	215.496	113.937	112.105	129.495	7.3006	5.7065	7.25759	7.68284	6.7978	6.73632	6.86061	P	P	P	P	P	P	P	chr3	RP11-933H2.4	TATTCATTCTCCTGCTGAAGTACATTTCAGGTTGTTGCTATTCCTCTGCTGATCCCCCTC	1978	ENST00000502521	Ensembl	-	131100319	131043935	noncoding	intronic antisense	NM_024800	NEK11	serine/threonine-protein kinase Nek11 isoform 1	+	130745693	131069309
ASHG19A3A021600	149.739	46.2949	140.977	215.496	113.937	112.105	129.495	7.3006	5.7065	7.25759	7.68284	6.7978	6.73632	6.86061	P	P	P	P	P	P	P	chr3	RP11-933H2.4	TATTCATTCTCCTGCTGAAGTACATTTCAGGTTGTTGCTATTCCTCTGCTGATCCCCCTC	1978	ENST00000502521	Ensembl	-	131100319	131043935	noncoding	bidirectional	NM_001171906	NUDT16	U8 snoRNA-decapping enzyme isoform 1	+	131100608	131101641
ASHG19A3A028367	20.1984	13.838	17.0696	30.9563	38.1648	33.4013	39.4472	4.50324	4.15379	4.34811	4.77037	5.16254	4.93416	5.07518	A	P	A	P	P	P	P	chr5	RP11-60A8.1	TTGAAGAAGACCACTGCGTCGGTATTTGTGAAATGTTTTGAGCCTCTGGATTTAAATAAG	941	ENST00000513379	Ensembl	+	72590757	72509780	noncoding	intergenic
ASHG19A3L0000902	93.7214	77.2769	98.8014	92.0315	162.425	184.473	178.488	6.66843	6.39634	6.76719	6.41563	7.33524	7.49329	7.35013	P	P	P	P	P	P	P	chr16	lincRNA-ZNF469-2	TCATCTTGAGGCATGGGGCTGTGGCTTCTGGGAGTCATAGCTGAACCCAGGGAAGCTTTG	538	BY797754	lincRNA	+	88333657	88333119	noncoding	intergenic
ASHG19A3L0002157	602.402	558.806	633.109	466.664	889.282	937.485	921.899	9.18148	9.06896	9.293	8.87846	9.9053	9.95509	9.86064	P	P	P	P	P	P	P	chr8	lincRNA-RIPK2-3	AGGCTCCTCCCTGCTTTAAGAGACATAAGGAATTCATTTAAGGTAAGTTATTTCTTACCA	18823	chr8:90889605-90908427-	lincRNA	-	90908427	90889605	noncoding	intergenic
ASHG19A3A021998	824.344	867.669	746.475	637.12	556.831	661.966	620.081	9.59127	9.67302	9.51421	9.35301	9.19928	9.43036	9.25077	P	P	P	P	P	P	P	chr3	RP11-252O18.3	GATTCTTCATCAGAGAGTGAAGAAACATCTACCTCTTCCTCCTCAGAGGACAGTGACACA	486	ENST00000392635	Ensembl	-	181584942	181584132	noncoding	intergenic
ASHG19A3L0001655	122.63	113.923	106.543	208.504	59.8439	179.785	87.4648	7.03509	6.92895	6.87506	7.63485	5.84054	7.45592	6.27086	P	P	P	P	P	P	P	chr5	lincRNA-HCN1-1	TGAAGCACCATGATAACCTGTGGCCCTCCGTTAAGTACAAAAGGTAGAATTTATTATTAA	30076	chr5:49632068-49662143-	lincRNA	-	49662143	49632068	noncoding	intergenic
ASHG19A3A015592	121014	129368	123172	96874	103994	102101	100400	16.5836	16.7436	16.762	16.8051	16.828	16.7693	16.7404	M	P	P	P	P	P	P	chr2	AC013717.3	AACATTGCTCGACAGATGCAGCACTGATCCTTAGCCAGAGAACTCTCTGGAACCATTAAA	488	ENST00000429825	Ensembl	+	44498247	44497759	noncoding	intergenic
ASHG19A3A048733	26.001	21.9859	20.8054	15.3121	25.9901	23.8798	36.0552	4.87266	4.72064	4.62043	3.68384	4.57954	4.43775	4.94471	A	P	P	P	P	P	P	chr12		AGCCTGTTCTCAGCTCAAGGCAATCTCCAGAAACTGAAGAACATGACCTTTCTAAATGCA	3943	HIT000045925	H-invDB	+	57268052	57216769	noncoding	intergenic
ASHG19A3A011706	34.629	21.4544	27.7111	38.7467	39.0561	25.5671	47.4857	5.27092	4.69322	5.01654	5.10962	5.1958	4.53724	5.35838	A	P	P	P	P	P	P	chr1	RP11-145A3.2	ATTGTTTTGGATTACTTAGTGGACTCAGCATGGAAACTGCTTGTGTGGCCCAGCTAGGTA	534	ENST00000428148	Ensembl	-	225923976	225898669	noncoding	intergenic
ASHG19A3L0002553	23.3043	16.8475	30.7499	35.2988	37.552	35.9422	46.7745	4.71313	4.39632	5.16024	4.96843	5.13685	5.05017	5.33521	A	P	P	P	P	P	P	chr7	lincRNA-JHDM1D-2	AGTTTTAAGTCCCAGACCTGTTTAGTAACTAGCTTTAATCCCAGGGCACCAAGTCTCTGG	567	AW851687	lincRNA	-	139942576	139942020	noncoding	intergenic
ASHG19A3A040406	239.564	204.93	224.278	135.594	258.141	267.834	290.239	7.94054	7.72743	7.87767	6.98373	8.04576	8.06184	8.09648	P	P	P	P	P	P	P	chrX	LOC286467	TTTTCTATCTTCTGCTCTTTGCCACCTGTGAGGTCCCTGAAAATGAAGGCCAATACTACC	2951	NR_026975	RefSeq_NR	-	130964671	130836678	noncoding	intergenic
ASHG19A3A029945	2291.27	2317.13	2134.44	4121.72	3782.87	3948.81	4072.53	11.0206	11.0381	10.9679	12.1241	12.0328	12.0642	12.036	M	P	P	P	P	P	P	chr1		GGTAGGTAATTTACTTTCTATTGTACTCATAGTTTGTTTGAAACCTCTTCACCTCTATCC	5572	AL832122	misc_RNA	-	23613245	23607802	noncoding	intergenic
ASHG19A3L0002747	31.3737	64.4188	43.4929	63.9449	28.8457	17.9534	30.4421	5.12789	6.14742	5.63895	5.86298	4.74484	3.99177	4.67975	P	P	P	P	P	P	P	chr11	lincRNA-BTG4	AAGAATGCAACCTCGATGCCTACACTTCCCCAAGAACTGGGATAATGTCAATAAGGAGAG	706	AB231705	lincRNA	+	111327330	111322063	noncoding	intergenic
ASHG19A3A032951	1743.39	1763.1	1759.11	2515.18	2571.22	2498.01	2500.33	10.6181	10.6381	10.6991	11.4012	11.4714	11.4009	11.3363	P	P	P	P	P	P	P	chr7	LOC493754	AATGATGACCATGTGGACATGCTTTCGGGCCTTCAGGATCTTCTCCAGCCAGTGGATGTC	4265	uc010lac.1	UCSC_knowngene	-	66057363	65993445	noncoding	intergenic
ASHG19A3L0000338	141.365	164.587	133.341	558.243	196.616	452.35	220.825	7.22658	7.42824	7.18303	9.15472	7.62079	8.85362	7.67296	P	P	P	P	P	P	P	chr11	lincRNA-KIRREL3-1	TTCCCTCACTCCTCATCTTCAGCCAGGAAAGATCTGCAAGGCAGTTTTGTTAATTTCCTA	472	AA827066	lincRNA	-	128166053	128165590	noncoding	intergenic
ASHG19A3A000115	34.9546	35.1096	27.4556	25.5225	19.9734	18.7054	28.0043	5.2852	5.33911	5.00376	4.47835	4.19361	4.05826	4.54973	P	P	P	P	P	P	P	chr7	AC073115.6	AAGTCACCCACGCAAACACTTAAAGGACCATACTTATTTTACAAGAGGAACAGTTTTCAA	555	ENST00000416708	Ensembl	+	46019790	46009255	noncoding	intergenic
ASHG19A3A025724	50.2949	41.7968	49.0338	268.873	270.019	278.449	284.477	5.79134	5.5689	5.80419	8.02817	8.11232	8.12235	8.06589	P	P	P	P	P	P	P	chr4	BC036848	CCTGGCTATCCTGGAGTTTTCCAGTTCATCAGCCATCCAATAAAAATGATGTCAAGCCTG	756	uc003hlr.1	UCSC_knowngene	+	80229698	79892901	noncoding	intergenic
ASHG19A3L0003126	6987.47	6146.45	7272.22	7504.42	7128.09	5457.04	6763.46	12.5813	12.4339	12.6914	13.0166	12.9638	12.5411	12.7881	P	P	P	P	P	P	P	chr5	lincRNA-MAP3K1-2	TCAGGCTTTTGTCTAAATATGTGAAGACTGACAAGACTATCTCCCCTCGTGCCGAATTCT	599	BU729004	lincRNA	+	56109992	55838650	noncoding	intergenic
ASHG19A3L0001849	220.685	185.423	220.333	169.629	318.585	185.491	398.973	7.83038	7.58961	7.85479	7.32696	8.35129	7.50273	8.57079	P	P	P	P	P	P	P	chr7	lincRNA-SLC26A3	AACCCATAGATGCCTTCTCGCTTCCTTTCTCTCTCTAACTGAGACTGAGATAAGAGGAAC	351	AI621345	lincRNA	-	107517966	107517667	noncoding	intergenic
ASHG19A3L0002069	348.926	294.529	380.646	353.857	544.796	322.381	613.198	8.45402	8.20582	8.6165	8.45316	9.1703	8.33946	9.23031	P	P	P	P	P	P	P	chr8	lincRNA-EBF2-1	TTAACTAAAGCCCTGGTCTCACTTTACCTGCCTTATCCCACCACCAGAGTTGTTGTTGTT	568	DB078790	lincRNA	-	26047981	26047433	noncoding	intergenic
ASHG19A3A039244	67.1603	54.276	55.4109	59.1419	70.3817	57.6138	78.7872	6.20146	5.91405	5.96904	5.74444	6.07983	5.75209	6.1185	P	P	P	P	P	P	P	chr9	RP11-343J18.2	ATTCTGTGGCAGAGATTAAAACAATTTCAGAAGCAGGCACCCAATCCTTCTCTTTGGATG	316	ENST00000441473	Ensembl	+	128921892	128819858	noncoding	intergenic
ASHG19A3L0002672	97.8214	88.441	103.292	168.705	189.148	140.969	245.426	6.72742	6.5812	6.83099	7.31853	7.5629	7.08543	7.83974	P	P	P	P	P	P	P	chr4	lincRNA-NEIL3	TGTGAAGATTCCTTGTGTCCTCCAGGTTGAAATGGGAGTTCTTTTTCCTGTTTTCTCTTT	4381	chr4:178294426-178298806-	lincRNA	-	178298806	178294426	noncoding	intergenic
ASHG19A3A014776	42.9535	34.5605	32.7579	10.6531	14.5582	26.8321	15.4254	5.56862	5.31713	5.24419	3.11541	3.69384	4.61022	3.61144	P	P	P	A	A	P	A	chr2	AC006460.2	GGAATGTGGTGTTTATTGAGGAACAGGCAACCCTTACATTTGAATAAAAGATGCCATATA	717	ENST00000411949	Ensembl	-	191573442	191541760	noncoding	intronic antisense	NM_005966	NAB1	NGFI-A-binding protein 1	+	191513847	191557492
ASHG19A3L0002327	72.9448	77.8049	73.7724	157.266	177.368	172.985	188.936	6.32187	6.40627	6.36785	7.20938	7.46697	7.3975	7.43337	P	P	P	M	M	M	M	chrX	lincRNA-STARD8	TGGCAAGATGTTAGTGAATCTAACTGGTGTGTATATGGGTGTTCAATGTGCTATTTTTTC	670	BX096636	lincRNA	+	67792306	67791644	noncoding	intergenic
ASHG19A3A009937	53.2783	49.3265	50.9131	69.5154	61.2826	76.438	59.2809	5.8745	5.7882	5.85376	5.98978	5.87592	6.17251	5.69099	P	P	P	P	P	P	P	chr17		CTAGAAATGAAATAAATACTGAGGGGCTCAGGGTGTCGTACAGCAAGTGTGAAAGGGCTT	1903	AK021565	RNAdb	+	73601517	73599615	noncoding	intergenic
ASHG19A3A008093	935.848	947.391	897.198	308.91	273.031	303.6	318.707	9.76937	9.78636	9.76591	8.2377	8.12814	8.25264	8.23478	M	P	P	P	P	P	P	chr1	GAS5	AATGGTGAGTTGGGGAACATAGAGAGTACACCTAAGTTCACATGAAGTTGTTTCTTCCCA	1695	uc001gjk.2	UCSC_knowngene	-	173837125	173833039	noncoding	bidirectional	NM_032522	ZBTB37	zinc finger and BTB domain-containing protein 37	+	173837492	173842778
ASHG19A3A008093	935.848	947.391	897.198	308.91	273.031	303.6	318.707	9.76937	9.78636	9.76591	8.2377	8.12814	8.25264	8.23478	M	P	P	P	P	P	P	chr1	GAS5	AATGGTGAGTTGGGGAACATAGAGAGTACACCTAAGTTCACATGAAGTTGTTTCTTCCCA	1695	uc001gjk.2	UCSC_knowngene	-	173837125	173833039	noncoding	bidirectional	NM_001122770	ZBTB37	zinc finger and BTB domain-containing protein 37	+	173837492	173855774
ASHG19A3L0003057	96.4631	143.947	117.091	490.439	250.525	204.02	237.372	6.70949	7.24906	7.00127	8.95734	7.99767	7.64361	7.78787	M	M	P	P	P	P	P	chr7	lincRNA-INHBA-1	GAAAGGCCTGTTGTAAAATACTTGGTTCTGTCTTGGATACTCACCCTTCTCCTTCTTGAC	83	FN091184	lincRNA	+	41046402	41046322	noncoding	intergenic
ASHG19A3L0002557	13.6774	26.7436	32.3401	71.4188	25.7008	18.6844	37.1021	3.95071	4.97854	5.22846	6.03022	4.56237	4.05554	4.98527	A	A	P	P	P	P	P	chr7	lincRNA-NPVF-3	TTATTTGATCACTCCTTTGCGTCTTCAACAGAATAAGGCCAACTCATCACACTTTCCCGG	7922	chr7:25891558-25899479-	lincRNA	-	25899479	25891558	noncoding	intergenic
ASHG19A3L0001421	26.0808	30.4321	28.2687	35.0797	37.9957	23.4262	35.461	4.87646	5.14537	5.04436	4.95874	5.15432	4.40477	4.91627	P	P	P	P	P	P	P	chr3	lincRNA-SRGAP3	ATCTCGCTTATGAACGTATTTGAAAAACAAACATCTCTCTTAAGTCTCTAAGTTAAAAAA	513	CA394812	lincRNA	-	9348664	9348151	noncoding	intergenic
ASHG19A3A009981	611.394	605.969	588.764	396.87	359.903	362.756	394.375	9.20244	9.18092	9.1844	8.6243	8.52613	8.51001	8.55109	P	P	P	P	P	P	P	chr17	C17orf86	TGTAGTTAGTATCAGAGAGCCCTTGCTTTTCAAAACTTCATAAACAATGTTACTGTCATG	1028	ENST00000366365	Ensembl	+	75086180	75084949	noncoding	exon sense-overlapping	NM_001204410	SEC14L1	SEC14-like protein 1 isoform a	+	75085234	75213181
ASHG19A3A009981	611.394	605.969	588.764	396.87	359.903	362.756	394.375	9.20244	9.18092	9.1844	8.6243	8.52613	8.51001	8.55109	P	P	P	P	P	P	P	chr17	C17orf86	TGTAGTTAGTATCAGAGAGCCCTTGCTTTTCAAAACTTCATAAACAATGTTACTGTCATG	1028	ENST00000366365	Ensembl	+	75086180	75084949	noncoding	exon sense-overlapping	NM_001204408	SEC14L1	SEC14-like protein 1 isoform b	+	75084724	75213181
ASHG19A3A000409	37.5168	39.2132	48.2542	23.9089	22.8445	42.0643	26.8805	5.37986	5.48438	5.78261	4.37695	4.38857	5.28541	4.48655	P	P	P	P	P	P	P	chr4	RP11-453E17.1	CAGATGCTTCAATGTAAAGGTCATTTCCAGctatgtgttccaagattactgaagcaggat	1445	ENST00000498917	Ensembl	+	68588223	68566997	noncoding	bidirectional	NM_018227	UBA6	ubiquitin-like modifier-activating enzyme 6	-	68481478	68566889
ASHG19A3A037062	83.545	102.551	94.855	201.095	44.0065	188.549	66.5716	6.51089	6.78709	6.71461	7.58085	5.37265	7.52664	5.86334	P	P	P	P	P	P	P	chr9	RP11-125B21.2	ATATGAGAAATGTCACCTCCTGGCTACCACAATAATGCAACTAGGAGTTCTGGTTCTCCG	746	ENST00000424605	Ensembl	-	2570754	2535651	noncoding	intergenic
ASHG19A3L0002809	28.6164	20.3705	25.6964	21.8503	17.4478	26.762	16.1344	5.00294	4.6309	4.9108	4.23627	3.9812	4.60539	3.68482	A	P	P	A	P	P	P	chrX	lincRNA-MID1IP1-5	GAGGTGGGGGAAGATGGGATGGGGGGCTGGAGGCATTGATTTTATTTTTAAAATTGTAAA	4218	chrX:39487152-39491369-	lincRNA	-	39491369	39487152	noncoding	intergenic
ASHG19A3L0002750	1078.87	948.221	891.515	369.905	138.227	318.642	177.501	9.95724	9.78736	9.759	8.51569	7.09013	8.32489	7.34123	P	P	P	P	P	P	P	chr11	lincRNA-SLN	GCACAGCCATTTTGTATACTCCCCTGAACTCTTATTCTTTAAGAACGTTGACTTTTCCCC	821	EB386665	lincRNA	-	107644892	107644071	noncoding	intergenic
ASHG19A3A055152	253.905	262.766	250.467	463.185	500.227	481.559	481.114	8.01644	8.0567	8.02581	8.86602	9.0454	8.95002	8.8582	M	P	P	P	P	P	P	chr19	AK094188	ACACATTTAATGACAGAAGTCTCAGGCTGGAAACACTCTTTTTGTAGAACATACAAATGG	2480	uc002nrw.1	UCSC_knowngene	-	28237138	28221180	noncoding	intergenic
ASHG19A3L0002376	489.953	395.92	527.436	452.172	465.617	373.011	555.082	8.90022	8.62016	9.03797	8.82317	8.93001	8.55309	9.08595	P	P	P	P	P	P	P	chr1	lincRNA-GPR61	TATAACCCTGTAAGTAAGAATCCAGCTCATTAGGTACTACTGAACTCCCCTCTGACAGCC	451	AA457263	lincRNA	+	110072818	110072368	noncoding	intergenic
ASHG19A3L0002604	24.5291	14.3297	20.1346	36.1598	27.3236	25.2541	40.0013	4.78543	4.19477	4.57807	5.00512	4.65841	4.51691	5.09759	A	P	P	P	P	P	P	chr12	lincRNA-NTF3-3	AAGTTTTTGAATGAATTAGTGGAGAAGGAATGATGGGCAGTCATGGGTTCCTGCCCTCGA	681	CN357896	lincRNA	+	5489100	5488419	noncoding	intergenic
ASHG19A3L0001739	603.883	570.703	632.466	792.602	978.382	675.266	1071.46	9.18637	9.0968	9.29119	9.68624	10.0537	9.46196	10.0861	P	P	P	P	P	P	P	chr6	lincRNA-CITED2-2	CTATCTCGCAGATCTTCTGGTCTCTTGCTCCCACCCATAGAGAATTCAATTGTATTTTTT	13101	chr6:140889232-140902332-	lincRNA	-	140902332	140889232	noncoding	intergenic
ASHG19A3L0002722	764.643	791.028	790.871	576.102	598.87	654.854	661.247	9.48949	9.54194	9.59794	9.20035	9.31126	9.41331	9.34918	P	P	P	P	P	P	P	chr11	lincRNA-OPCML	TAAAAAACAACAAGCAAACGAGCTGATGACAAACTCCCGCCCAACAGTGAAGGAACCACA	700	BF679456	lincRNA	-	133559552	133309334	noncoding	intron sense-overlapping	NM_001012393	OPCML	opioid-binding protein/cell adhesion molecule	-	132284874	133402403
ASHG19A3L0002328	42.6482	41.712	50.4369	39.3685	65.4681	74.7705	83.608	5.55958	5.56579	5.84033	5.13234	5.973	6.14276	6.20561	P	P	P	P	P	P	P	chrX	lincRNA-STS	TATCAGAATACAGTTGCTGTCCTTGCCAAAACAAAGACACCTGGTTCCATGTGTCAGCCT	344	BF511390	lincRNA	-	7533347	7532690	noncoding	intergenic
ASHG19A3L0002142	190.827	130.917	135.01	257.348	53.4746	191.443	68.086	7.63913	7.11986	7.19923	7.96418	5.66598	7.54925	5.89784	P	P	P	P	P	P	P	chr8	lincRNA-CA2	ATAGTTCAGCAGAATGTCTGGCTGTTCTTGGCTGAGTTCTCCTTCTCTTGCCTTAGCTAT	42426	chr8:86474623-86517048-	lincRNA	-	86517048	86474623	noncoding	intergenic
ASHG19A3L0000206	16.9207	27.3334	27.8451	40.621	18.0101	22.6743	21.0787	4.24278	5.00673	5.02386	5.17735	4.03009	4.35649	4.10835	P	A	P	P	P	P	P	chr10	lincRNA-PRLHR-3	ATAAAAGACTTCCCAGAAATCCTCAGTGCAGTCCACTTCAATTTGATTGGCCAGACCATG	10526	chr10:120275035-120285560+	lincRNA	+	120285560	120275035	noncoding	intergenic
ASHG19A3L0000534	164.22	140.737	155.738	187.442	160.382	168.131	168.508	7.43317	7.21833	7.38991	7.4781	7.31676	7.3513	7.26077	P	P	P	P	P	P	P	chr12	lincRNA-TMTC2	CATTACATGGCTTGGTACTCAATAAAGGAAAACTTGTTCAAATAAGGTAATATCGCAGCA	267	AA405014	lincRNA	-	85065950	85065883	noncoding	intergenic
ASHG19A3A044503	90.8247	73.6401	92.2253	909.667	475.978	416.371	397.126	6.6206	6.3302	6.67214	9.90386	8.96491	8.72174	8.56544	P	P	P	P	P	P	P	chr10		TACAACACGTAAAATGTGAAAAAGACCTCTGACCCTGAAAGTCTCATTCTGCCCAGGCCA	1439	AK130806	misc_RNA	+	114592210	114590927	noncoding	intergenic
ASHG19A3L0001572	855.575	746.886	789.948	187.37	317.831	218.841	374.815	9.64278	9.46856	9.59594	7.47691	8.3474	7.75217	8.47585	P	P	P	P	P	P	P	chr5	lincRNA-CSNK1G3-1	TATTCTCAATAACAGAGAAGAAAAATAGAATTTCTTGCTTTGGGTGTGTGTGTGTGTGTG	416	BG897081	lincRNA	-	123717209	123716880	noncoding	intergenic
ASHG19A3L0000924	24.6849	14.8302	24.5123	26.6915	38.6546	29.3498	44.0209	4.79361	4.23655	4.84206	4.5483	5.18024	4.74564	5.24435	A	P	P	P	P	P	P	chr17	lincRNA-KCNJ2	CAGTGTCCTGGCTGACAAGAAAATATGCCAAAAAATGCAATAAATAGTTGTTTGAATGCT	19376	chr17:68976680-68996055-	lincRNA	-	68996055	68976680	noncoding	intergenic
ASHG19A3L0001664	27.5657	23.9421	12.9462	18.4337	26.961	13.5568	32.2872	4.95062	4.83297	3.96564	3.9768	4.63645	3.53736	4.77395	A	P	A	P	P	A	P	chr5	lincRNA-PLK2-3	GGGGAATTTTTTACTATCTCCTCTGTGAACATTAAGACAGTAGAACCAAAAATGACTATC	257	AA633857	lincRNA	+	57322674	57322419	noncoding	intergenic
ASHG19A3A037807	96.3859	72.7017	81.4527	89.5155	131.59	82.6872	158.487	6.70772	6.31394	6.50679	6.37524	7.01561	6.28398	7.17149	P	P	P	P	P	P	P	chr9	AK057451	TTCGAGAAGATTTTGTGGCCTTTCTCAGCTGTCTAGGTGCTGTAGGTGCTGTGTTTCTAT	1544	uc004bad.1	UCSC_knowngene	-	102582171	102348067	noncoding	intergenic
ASHG19A3L0000132	74.8825	72.572	80.2795	57.9246	60.2082	80.5037	78.8281	6.35811	6.31219	6.48806	5.71188	5.84904	6.24752	6.12006	P	P	P	P	P	P	P	chr1	lincRNA-GUCA2B	CCGGCGCCCTACCTCAGCCTGTAAACAGTATCAGGTCTCGCCCAACAAAAATCCAATGGA	732	BI459631	lincRNA	+	42502537	42501816	noncoding	intergenic
ASHG19A3A036816	506.514	494.317	415.306	712.366	310.069	593.926	340.285	8.94246	8.90934	8.72769	9.52014	8.30868	9.26626	8.33004	P	P	P	P	P	P	P	chr8	AP003356.1	TAAGACTCTGGGTCTGTCTGTGGGAAGAGCTTTCATTCCCCACCCCACTCTATGCCGACC	534	ENST00000405813	Ensembl	+	103819607	103819069	noncoding	intergenic
ASHG19A3L0002748	168.108	185.686	142.14	258.974	195.677	227.219	222.342	7.46429	7.59218	7.27052	7.97304	7.6122	7.80815	7.68372	P	P	P	P	P	P	P	chr11	lincRNA-ZC3H12C-2	GCAGAAATCGATGCAACATTTCTTTCCTGTCTGGGCTGTTTGTATAATTGTATATAAATG	2761	DQ916738	lincRNA	-	110167437	110066286	noncoding	exon sense-overlapping	NM_002906	RDX	radixin	-	110100165	110167437
ASHG19A3L0002351	20.7214	5.30321	35.4798	25.8848	18.7488	11.0179	7.3735	4.53813	2.33406	5.35382	4.50145	4.10065	3.20838	2.59219	A	P	P	A	P	A	P	chr4	lincRNA-FAM198B-1	ACACCTTATTCACCAACCATGTAAAGCTCATACAGTATTCCTTTTTCTGTCATACTATCT	21365	chr4:158983666-159005030+	lincRNA	+	159005030	158983666	noncoding	intergenic
ASHG19A3L0003566	26.8263	26.2385	19.8482	28.3391	22.2387	33.4458	33.8155	4.9153	4.9504	4.5582	4.63718	4.34658	4.93626	4.84097	P	P	P	P	P	P	P	chr3	lincRNA-GOLIM4-1	TGGGCCCAGGAGATGGAAATTATTCATAATATAGTCACAGACACTTTCCTTCCATATATT	5319	chr3:168554930-168560248-	lincRNA	-	168560248	168554930	noncoding	intergenic
ASHG19A3L0000718	275.179	220.152	290.65	113.063	555.474	607.232	642.67	8.11739	7.8225	8.24035	6.71106	9.19402	9.29965	9.30736	P	P	P	P	P	P	P	chr14	lincRNA-SRP54	ATGGCATCATTCCCCCATGAACTGCTATTCTGTGGCATACACGATACCTGCTGAAAAAGA	590	BX485243	lincRNA	+	35432824	35432234	noncoding	intergenic
ASHG19A3L0000899	121.702	139.127	129.289	115.944	167.293	172.738	194.691	7.02431	7.20213	7.13985	6.74476	7.37986	7.39486	7.48596	P	P	P	P	P	P	P	chr16	lincRNA-ZCCHC14	ACTTATAAAAATCCCTCCACACAGAAAACTGTGCCTTTCCAGGCTGAGTCCACTCGGATA	11751	chr16:87577874-87589624-	lincRNA	-	87589624	87577874	noncoding	intergenic
ASHG19A3L0001511	179.068	161.031	132.007	310.916	67.4257	297.821	49.9791	7.54812	7.39899	7.16836	8.24836	6.01965	8.22695	5.43382	P	P	P	P	P	P	P	chr4	lincRNA-CRMP1-2	AGCACCCACTGAATGGCTAGCTCACTTCCTCCTTATCATGTCCCGATGACGCAGGGAGAG	13651	chr4:5995874-6009524-	lincRNA	-	6009524	5995874	noncoding	intergenic
ASHG19A3L0000455	583.067	583.068	501.381	1064.57	459.692	375.04	542.112	9.12618	9.12708	8.97328	10.1383	8.91131	8.55991	9.046	P	P	P	P	P	P	P	chr12	lincRNA-SFSWAP-1	TTGCTCTCCCTCATCCCAACTGTGGAGCCCAGGAAGCAGCTTCCTGAGTCCCTCTAGGGC	11026	chr12:132296472-132307497-	lincRNA	-	132307497	132296472	noncoding	intergenic
ASHG19A3L0002267	82.2139	54.1341	83.4163	143.124	88.5895	63.6424	72.6018	6.48832	5.9108	6.54148	7.06607	6.41803	5.90501	5.99181	P	P	P	P	P	P	P	chrX	lincRNA-EGFL6-1	AAACAGATGCTCCTTCAGCCTCCTGAAATAAGAGAGGTTTAATACTGGAGTGCACCTGGA	596	DB264073	lincRNA	+	13496407	13470108	noncoding	intergenic
ASHG19A3A015366	263.878	207.247	262.779	348.232	325.102	216.761	321.894	8.06534	7.74531	8.09472	8.42763	8.38213	7.73738	8.24715	P	P	P	P	P	P	P	chr2	BC068572	ACAAAACACAGTCTGACTTAGAGATTCTCTGGCATGACTCTCTTCCCCACTGTGTACACT	3008	uc002rdf.2	UCSC_knowngene	+	20084807	20068620	noncoding	intergenic
ASHG19A3L0003124	145.795	135.669	134.948	173.915	159.06	170.127	187.356	7.26449	7.16671	7.19831	7.36166	7.30419	7.371	7.42137	P	P	P	P	P	P	P	chr5	lincRNA-ACTBL2-5	GAGATCTGAATGTAATCATTGAACTTTAATGGTAAATTATAGTCCTGTGAACTAATTGAC	75	FN053659	lincRNA	+	56563968	56563894	noncoding	intergenic
ASHG19A3A029214	416.176	406.933	400.725	195.808	190.439	195.544	223.477	8.69237	8.65832	8.68279	7.54285	7.571	7.58114	7.69053	P	P	P	P	P	P	P	chr1	RP11-423O2.4	TCCTGTTTTGAGAATGTTAATGGATACACCAGCTGCTGCTTTGGATTTCACCCATTGGCG	153	ENST00000433327	Ensembl	+	142799739	142799586	noncoding	intergenic
ASHG19A3A013597	19.5305	20.9663	18.7085	17.1333	35.1078	25.7922	45.1149	4.45648	4.66483	4.47413	3.86058	5.03623	4.54994	5.28036	A	P	P	P	P	P	P	chr2	AC073283.4	GGCAGACAGTGAGGGCAGGATGGTAGAAAATGTGTTGACTCAGTGCCAGACCCTGAACTA	577	ENST00000448713	Ensembl	-	47572128	47419543	noncoding	intergenic
ASHG19A3L0000386	30.4224	21.2935	29.3026	29.9123	43.8155	25.9696	55.2025	5.08728	4.68472	5.09564	4.7197	5.36614	4.56071	5.58497	A	P	P	P	P	P	P	chr11	lincRNA-CD82-2	AGTCTGAATAATTCCTTCTGGCTGGAGGTGTGGGTAGGAGATCATTCTGTATCCATCTAC	653	BI519687	lincRNA	-	44731244	44730596	noncoding	intergenic
ASHG19A3A029633	33964.3	34882.9	33649.4	13162.5	12834.2	13539.2	13423.2	14.799	14.8623	14.8802	13.8435	13.8382	13.8873	13.7914	P	P	P	P	P	P	P	chr6	IFITM4P	ATTCACCTACTCCCTGAAGTCTAGGGACAGGAAGATGGTTGGAGACCTGACTGGGGCCCA	342	NR_001590	RefSeq_NR	-	29718925	29718584	noncoding	intergenic
ASHG19A3L0002910	63.5986	62.075	69.1824	92.1934	116.672	140.701	163.011	6.11794	6.09909	6.27485	6.41789	6.83618	7.08345	7.21291	P	P	P	P	P	P	P	chr12	lincRNA-NEDD1-7	TCTCTGATGATCGTTCCCTTCTTGAAAGCTATTCCTTCTTCAGGATTATTCACCATGATT	480	AI149906	lincRNA	+	96860187	96859717	noncoding	intergenic
ASHG19A3L0000594	46.1129	52.0273	47.6953	68.9612	27.6745	56.9267	31.0573	5.67135	5.8624	5.76526	5.97661	4.67873	5.73683	4.71264	P	P	P	P	P	P	P	chr13	lincRNA-CRYL1	CTCTTCAGATCTTCTGTGGGTGCTCTGTCCCCCAACAGAAGTTACTCTGCAATGTTAATT	20251	chr13:20881350-20901600+	lincRNA	+	20901600	20881350	noncoding	intergenic
ASHG19A3A033600	91046	87675	88570.6	44196.3	39392.3	26775.8	39698.4	16.1936	16.1911	16.2605	15.6507	15.4446	14.8714	15.3845	P	P	P	P	P	P	P	chr7	AC008155.1	GCTGAAGATGATGCGGATGACGATGTCGATACCAAGAAGCAGAAGACCCACGAGGATGAC	329	ENST00000421078	Ensembl	-	138089268	138088939	noncoding	intergenic
ASHG19A3L0001813	53.2944	11.2976	41.1709	70.0141	44.4834	27.7185	28.7215	5.87543	3.91584	5.56137	5.99943	5.3899	4.65951	4.59368	A	P	P	P	P	P	P	chr6	lincRNA-KIAA1586	GGAATGTGTGTCACATAATTCCAAAGATCCAGAATCTCTTTCTTTTCCTTTTCCTCTCTT	673	AV723845	lincRNA	-	56933924	56933276	noncoding	intergenic
ASHG19A3A043863	19.0887	15.4601	21.1621	42.7632	35.4431	38.3889	44.6928	4.4227	4.28589	4.64294	5.25415	5.05104	5.14883	5.26913	A	P	P	P	P	P	P	chr10	RP11-168P8.2	TGAATTGCGCACGAATTTTTACACAGCGCCAAAGGAAACTGCCTGTACTTACTGTTGTAG	1974	ENST00000431737	Ensembl	+	44390881	44354858	noncoding	intergenic
ASHG19A3L0002165	116.936	109.546	116.32	77.9176	120.875	84.6337	143.38	6.96859	6.87632	6.99232	6.16532	6.88784	6.3195	7.02512	P	P	P	P	P	P	P	chr8	lincRNA-TP53INP1-2	TTGGTCTGGAAAACACTTTCAAGCCCACTGTCTCACTCTCTTGTCACTATAAATAACCTG	451	AW661714	lincRNA	-	95963624	95962452	noncoding	intergenic
ASHG19A3L0003467	21.8729	11.8235	14.8652	19.9619	20.1503	31.8774	27.7574	4.61446	3.96981	4.15843	4.09879	4.20648	4.86964	4.53499	A	P	A	P	P	P	P	chr2	lincRNA-RND3-2	GCTTCTTTCAAGTGTTGCCTTTCGACACCTTGGTTGACTGATCTTATGGTATGGCTTGGT	9093	chr2:151258410-151267502+	lincRNA	+	151267502	151258410	noncoding	intergenic
ASHG19A3A055200	70.1313	43.9827	43.4751	149.944	130.625	143.511	153.404	6.26524	5.63541	5.6376	7.13517	7.0049	7.11209	7.12615	P	P	P	P	P	P	P	chr4	RP11-93L9.1	AGACCAGCGTTCTCAAATGAAGGTGCCAGATCTGCTGTTAGAGGAGAATTCTTCTGTCCT	645	ENST00000508111	Ensembl	+	124851561	124571445	noncoding	intergenic
ASHG19A3A022959	29.8417	14.9339	39.3762	42.1393	39.6722	17.9218	47.4174	5.06306	4.24445	5.50087	5.23365	5.21744	3.98915	5.35583	A	P	P	P	P	P	P	chr3	MT-ND2	CCAATATGCTATTCTCTGGACAATGAACCATCATAAACTCAATCAATCAACTATCAACCT	351	ENST00000482139	Ensembl	+	106621370	106621019	noncoding	intergenic
ASHG19A3L0003254	37.957	31.3898	29.5021	48.5434	49.0395	35.7633	53.815	5.39509	5.18879	5.1043	5.44618	5.53469	5.04194	5.54646	P	P	P	P	P	P	P	chr6	lincRNA-BAI3	GACATGGCATTTATTCAAATGCTGGTGTCACATTCCATGCTCTTTTTTCCTTAAAAAACA	5578	chr6:70134290-70139867-	lincRNA	-	70139867	70134290	noncoding	intergenic
ASHG19A3L0002798	40.4765	39.8867	45.3398	29.1781	42.0957	23.878	45.8856	5.48269	5.50736	5.69691	4.68281	5.30787	4.43755	5.30369	P	P	P	P	P	P	P	chr3	lincRNA-DNAH1	GGGCTCTGGGCAGCTCAAGGAAGGGGCTGGGGACTCTAATCACTTGTGAAAAAGTCAAGG	498	AW062720	lincRNA	+	52340170	52339697	noncoding	intergenic
ASHG19A3A041206	427.251	440.312	428.737	400.005	425.566	372.356	395.559	8.72834	8.76263	8.76419	8.63426	8.78245	8.55088	8.55777	P	P	P	P	P	P	P	chrX	RP11-451L9.3	AGAAAAGAGATGAGAGACCACTCTTTCCCCAAATTCTCACCTCTATTAAGCTGCTGACCC	2725	ENST00000445336	Ensembl	+	74805341	74802493	noncoding	intergenic
ASHG19A3L0002203	391.332	478.106	460.195	231.057	539.653	617.835	613.658	8.60545	8.86787	8.85794	7.79781	9.16016	9.32513	9.23197	P	P	P	P	P	P	P	chr9	lincRNA-MPDZ-1	TCATTGAGGTCTCTTTCCTACCCCCTGCATGCCTATAATGTCCCAGACCAAGAGTTTTTT	419	AA972029	lincRNA	+	12959235	12958862	noncoding	intergenic
ASHG19A3L0000397	29.2847	16.2075	23.1955	67.9795	19.421	46.9929	27.9409	5.03448	4.34429	4.76419	5.95324	4.15268	5.45209	4.54706	A	P	P	P	P	P	P	chr11	lincRNA-MYEOV-3	TCTTCACAAGATATGTCATATCTAACCCTGGTCCTTTGACTGTGACTATCTGGAATAGCG	657	BG946037	lincRNA	+	68999879	68999255	noncoding	intergenic
ASHG19A3L0002151	11.5866	10.7091	15.9084	81.4041	62.3579	80.8071	73.6515	3.71699	3.84737	4.25468	6.23363	5.9042	6.25213	6.01495	A	A	A	P	P	P	P	chr8	lincRNA-PPP1R3B-2	TCAAAGTAGGGGTGTTGATGTTCTTCCGGAATGTGCAGCAGTTGCTGATAATATTGGCTG	594	CD518212	lincRNA	+	8978955	8978376	noncoding	intergenic
ASHG19A3A018440	27.5177	17.652	24.5902	38.1259	10.0349	34.0366	5	4.94675	4.45069	4.84714	5.08422	3.11698	4.96685	2.32841	A	P	P	A	A	P	P	chr20		TTAGAAAAGGGAAGAGATTGGCAGGCATGGGATTCTCTGGATTATGTTATGTCTGGGCTG	1087	BC128522	misc_RNA	+	48935320	48934260	noncoding	intergenic
ASHG19A3L0002921	95.2153	68.2164	74.1297	160.746	53.838	31.5147	72.3567	6.68981	6.22646	6.37433	7.24244	5.67771	4.85053	5.98597	P	P	P	P	P	P	P	chr2	lincRNA-MYO1B-3	ATTAAAGGAGAACCATCCTAGTTCAGCCTCTGCCAGGTTAGACCAAAAAGTGGATTGCTG	381	AW872580	lincRNA	-	192420136	192419797	noncoding	intergenic
ASHG19A3A036325	31974.4	32301.5	31090.5	45553.5	44130	47314.3	43705.3	14.7146	14.7599	14.7599	15.7094	15.6204	15.7151	15.5347	P	P	P	P	P	P	P	chr8	AC087763.1	GGGGTCAAGTATACCCCCAATCGTGACCCTCCGGACAAGCGGTGGGCCCTGCACTCATGA	303	ENST00000438775	Ensembl	+	8819573	8819268	noncoding	intergenic
ASHG19A3L0000036	24.7173	27.1305	20.0593	39.0019	44.6666	40.4221	56.7793	4.79566	4.99651	4.57221	5.11939	5.39735	5.22285	5.62831	P	P	P	P	P	P	P	chr1	lincRNA-ACTL8	ACTCACCATTTAAATAAATCCCAGCCCTAGGGGCTGATGGAGCCCTCTGTAATATGGAAT	22301	chr1:18391088-18413388-	lincRNA	-	18413388	18391088	noncoding	intergenic
ASHG19A3L0001237	25.445	19.8314	22.3497	26.0132	29.4366	22.1721	33.8441	4.83978	4.59584	4.71711	4.50744	4.77244	4.32168	4.84256	A	P	P	P	P	P	P	chr2	lincRNA-RPIA-4	AGGCTATCTTTCGGTAGAGTGACCAACTGTCCCAGATTCCCAAGGTTTTATAGGATATGG	14426	chr2:88954435-88968860+	lincRNA	+	88968860	88954435	noncoding	intergenic
ASHG19A3A012488	1791.88	1831.59	1856.08	876.534	877.181	923.917	989.914	10.662	10.6993	10.7794	9.84405	9.88631	9.93052	9.96713	P	P	P	P	P	P	P	chr19	AC008507.1	AATACTGCCAATGAATCATCAAATGCATTGAAAAAGCGTGAAGAAGATGATTATGATAAT	756	ENST00000392268	Ensembl	+	30529091	30528329	noncoding	intergenic
ASHG19A3L0002297	29.4667	25.5663	29.7733	34.3074	51.5357	27.2806	61.956	5.04388	4.91503	5.11736	4.9244	5.60965	4.63374	5.7568	A	P	P	P	P	P	P	chrX	lincRNA-MAOA-6	GAAAATAAGTTGTGTTGGCTGTGACTCAGATAAGATCAGATTCACCATTGGACCCCTGGA	560	DB025468	lincRNA	+	42779836	42637608	noncoding	intergenic
ASHG19A3L0001132	5	19.3126	5	35.6596	42.5505	30.693	50.7951	2.37766	4.56402	2.39437	4.9821	5.32241	4.81368	5.4566	A	A	A	P	P	P	P	chr2	lincRNA-SLC39A10-4	TCCTAGTAAAGAAGTCCTTTTATTGTTTCAAAGTCTTCTCATGATCTTAAAGGTGCAGCC	29401	chr2:196006180-196035580+	lincRNA	+	196035580	196006180	noncoding	intergenic
ASHG19A3A055144	200.135	192.446	199.138	15.7992	22.2683	20.8675	23.3674	7.70268	7.63894	7.72508	3.73539	4.34855	4.22616	4.2734	P	P	P	P	P	P	P	chr18	LOC647946	GCGCAATGTGGGGGCACCAGAAGCGGGCACCGTTGAGCTGTTGCAACTGTTCTGCTGGTA	2306	uc002lal.1	UCSC_knowngene	-	37380282	36786887	noncoding	intergenic
ASHG19A3A019187	331.537	303.01	328.399	756.035	718.872	743.997	745.36	8.38399	8.24781	8.40705	9.61624	9.58998	9.61122	9.53061	P	P	P	P	P	P	P	chr21	AP000569.8	CTATGTGAGATTGTATTGCAGGGCTCACATTTATTCTCTCAGCAGCTCATTGCACAGACA	9124	ENST00000427447	Ensembl	+	35349992	35303463	noncoding	intergenic
ASHG19A3L0002386	16.6123	14.3761	16.2405	20.6248	16.9829	18.6321	17.4769	4.21637	4.19913	4.28261	4.1474	3.94005	4.05143	3.8134	A	A	A	P	P	P	P	chr1	lincRNA-SNX7-1	GCTGATTTATTTATCTTCCAGGTTTTGAAAGGGCAGATTGTATCTTCTTCTAGCTATTTG	44879	chr1:99308094-99352972-	lincRNA	-	99352972	99308094	noncoding	intergenic
ASHG19A3A030932	29.5204	33.0454	36.9986	16.504	41.3108	50.0428	54.1768	5.04657	5.25929	5.41442	3.80217	5.28052	5.54404	5.55543	P	P	P	P	P	P	P	chr6	BC042032	AAGGGAATCTGTGTGGAGGCGGTGCCCTAAACATGCTGCCTTGAGGAGGGACCTCTACAT	1085	uc003mwo.2	UCSC_knowngene	+	5043682	5030205	noncoding	intergenic
ASHG19A3A054495	133.482	156.313	124.435	99.3722	129.777	92.1577	112.043	7.14656	7.35947	7.08788	6.52495	6.99682	6.44779	6.6446	P	P	P	P	M	M	M	chr16	BC073928	GGCCGGGCAAGAACGCCATTACCAACTGCAAATCCACAGGCAAATGCAAGAGGACAGAAA	1121	uc002dzu.2	UCSC_knowngene	+	30906537	30887232	noncoding	natural antisense	NM_004765	BCL7C	B-cell CLL/lymphoma 7 protein family member C	-	30899115	30905399
ASHG19A3L0001170	35.5844	18.8798	29.3663	52.4734	36.4181	41.854	77.8484	5.31104	4.53446	5.09795	5.56907	5.08844	5.27766	6.10027	A	P	P	P	P	P	P	chr2	lincRNA-COL6A3-1	TCCTTTCTCCTGATTTCCAGCAATATAATACTGCTAAGTTTCAGATAAATAGGCCATTTG	545	BE588180	lincRNA	+	238203134	238202589	noncoding	intergenic
ASHG19A3A035956	82.2979	72.5745	78.0222	98.1985	120.819	93.7883	129.344	6.48953	6.31229	6.44417	6.50655	6.8867	6.4754	6.85931	P	P	P	P	P	P	P	chr8	AC011118.2	TGTAGTTTCCAATGAAACAGGAAGGACTCTAATTGAGTGCCTGCCCACATCTCTACAGCT	1914	ENST00000501400	Ensembl	-	94712661	94358694	noncoding	bidirectional	NM_145269	FAM92A1	hypothetical protein LOC137392	+	94712772	94740671
ASHG19A3A054558	158.697	142.514	136.296	238.531	302.11	194.02	385.135	7.37986	7.23557	7.21137	7.84532	8.27249	7.56955	8.52029	P	P	P	P	P	P	P	chr16		ATTAAAAACATTGCTGCCGCCTACTTCTTCCAGCTGGGACTTCAGGACCATCTTTGAATC	2618	AK094311	misc_RNA	+	49333673	49331053	noncoding	intergenic
ASHG19A3L0001968	36.3258	37.9551	44.1937	45.2438	49.8469	39.7902	51.4005	5.33676	5.44221	5.66193	5.34441	5.56166	5.20117	5.47526	P	P	P	P	P	P	P	chr8	lincRNA-CSMD3-2	GGGAAAAGTACACCCATGACCTAAATAAGTTTTCTGAACAATCCTTCCTTTTTAGTTTGT	478	DB454079	lincRNA	+	111784988	111779094	noncoding	intergenic
ASHG19A3L0001807	34.1067	19.3816	25.0459	31.7018	36.1437	29.4677	48.2467	5.25112	4.56712	4.87245	4.81077	5.07882	4.75162	5.37986	A	P	P	P	P	P	P	chr6	lincRNA-CD2AP-1	TTGCACAGAGCTTGGGGTCTTAACTTGGCTTTTTGGATCTGGTCCTTTAAGTTACTGCAA	19901	chr6:47317091-47336991+	lincRNA	+	47336991	47317091	noncoding	intergenic
ASHG19A3A015727	26.5378	7.90786	18.3009	20.8142	23.0701	22.3524	26.2892	4.90086	3.51999	4.44136	4.16261	4.40467	4.33149	4.45288	A	P	P	P	P	P	P	chr2	AC074289.1	CTTTCCCACTATTCTCCTGCAGAAGAGCAGGGGAAGGAAGCACCAGGGTCCATCATGGAG	506	ENST00000438115	Ensembl	+	64456739	64370372	noncoding	intronic antisense	NM_020651	PELI1	protein pellino homolog 1	-	64319785	64371605
ASHG19A3A036809	58.4751	61.8514	66.651	67.6026	99.6024	99.7473	114.12	6.00295	6.09382	6.22373	5.94359	6.59471	6.56703	6.67274	P	P	P	P	P	P	P	chr1	RP11-445P19.1	ATGTGGAGAAGAAAGAACACTCAGATGTGCCCTGGAGACTTTCCTTTTATTTTTAAACAG	424	ENST00000427337	Ensembl	+	187446354	187412759	noncoding	intergenic
ASHG19A3A036104	46.9345	66.5032	47.8905	46.9003	39.2012	36.0203	43.4346	5.6943	6.19156	5.77224	5.39601	5.20101	5.05326	5.22445	P	P	P	P	P	P	P	chr1	AF387615	TCAAGGCCCACGAGGCGCACAAGATGCAGAGCACCCCGCAGGCCCGGCGCAAGGAATGGG	137	uc001gov.2	UCSC_knowngene	+	181382715	181382578	noncoding	intergenic
ASHG19A3L0002090	31.8698	18.0731	12.9254	76.3431	35.1555	17.299	35.6795	5.15229	4.4807	3.96366	6.13225	5.03761	3.93317	4.92814	A	P	A	P	P	P	P	chr8	lincRNA-EFCAB1-3	ATCATTGGCATCTTCTTCTTCTCTAGGTAGAAGCCTTTCTCTGACATCATCCGAGACAGC	716	BU681290	lincRNA	+	49623918	49623217	noncoding	intergenic
ASHG19A3A035501	98.2538	74.083	126.612	210.069	82.5787	85.6778	90.972	6.73512	6.33881	7.11006	7.64618	6.31868	6.33793	6.32747	P	P	P	P	P	P	P	chr8		TGCTGCTTCCACAGAGAAAACATTTTCTCTTTCCTCCTCTTGAACTTACATAATATCCTC	3013	AK091593	NRED	-	9760588	9757575	noncoding	intergenic
ASHG19A3A022858	48.1138	36.499	53.6522	76.7589	39.4845	32.9605	37.5311	5.72925	5.39017	5.92395	6.14075	5.2113	4.91781	5.00149	P	P	P	P	P	P	P	chr3	BC050344	TTTCCTACAGGAGCCTCAAGACTGCGTTTCAGGAAGCCCTAGGACCCACTGATCCTGCAG	4299	uc003dqo.2	UCSC_knowngene	+	87147851	87138429	noncoding	intergenic
ASHG19A3A054560	32.0199	22.0085	26.2295	57.7461	45.6792	38.3568	50.168	5.15783	4.72232	4.94243	5.70621	5.43203	5.14708	5.43863	A	P	P	P	P	P	P	chr16		TTGTCAACATGGGCTGTGCCAAGGAGTTCTGAGTTTCCTTCAGGTCTGTATTGTATCTTC	5937	AK128747	misc_RNA	+	49384465	49378528	noncoding	intergenic
ASHG19A3A029477	18.5753	11.8772	9.81677	22.2695	20.7681	15.795	24.956	4.37963	3.9748	3.59452	4.26427	4.25262	3.78807	4.37963	A	P	A	P	P	P	P	chr6	RP1-309H15.2	ACATTAGTGCAGTCAAGGATCAGGAAACCCCTTTCTAATTTGAGCAACACACATATGAAG	742	ENST00000427775	Ensembl	-	22594062	22589365	noncoding	intergenic
ASHG19A3A000042	695.916	744.646	666.744	343.632	392.644	280.082	406.091	9.37175	9.46313	9.36459	8.40594	8.65832	8.13011	8.59868	P	M	P	M	M	M	M	chr3		ATCAAATTTGAATGGATGAGGAGTTGCTTTTTAGGTTGCTCCTTGAGGGCAGGACAGTTC	4283	BC052961	NRED	-	9438342	9430536	noncoding	intergenic
ASHG19A3A028338	242.214	254.077	203.045	119.306	114.985	119.865	132.356	7.95456	8.01104	7.7499	6.79153	6.81145	6.8439	6.89714	P	P	P	P	P	P	P	chr1	BC047723	GAAAATGCCGGACTGTTGTTTGCAAGCTGGTTAAGTGAGCAAATCTTGGGAAGATTTCAA	1208	uc001edc.1	UCSC_knowngene	+	113542118	113499036	noncoding	bidirectional	NM_001166496	SLC16A1	monocarboxylate transporter 1	-	113454469	113498685
ASHG19A3A028338	242.214	254.077	203.045	119.306	114.985	119.865	132.356	7.95456	8.01104	7.7499	6.79153	6.81145	6.8439	6.89714	P	P	P	P	P	P	P	chr1	BC047723	GAAAATGCCGGACTGTTGTTTGCAAGCTGGTTAAGTGAGCAAATCTTGGGAAGATTTCAA	1208	uc001edc.1	UCSC_knowngene	+	113542118	113499036	noncoding	bidirectional	NM_003051	SLC16A1	monocarboxylate transporter 1	-	113454469	113498975
ASHG19A3A041603	191.004	186.094	165.694	160.474	128.46	143.016	130.227	7.64041	7.59537	7.47274	7.23916	6.98201	7.10631	6.86833	P	P	P	P	P	P	P	chrX	AK055694	CTCCTTTGCTACTCTGCTAGATATCCTTACAATTTGGTTTAGAATTTTAGTACCACTAAC	2222	uc004fai.1	UCSC_knowngene	+	136075814	135991553	noncoding	intergenic
ASHG19A3A008537	121.523	130.915	118.54	203.512	88.8114	178.576	108.844	7.02197	7.11972	7.01909	7.6012	6.42225	7.44366	6.60107	P	P	P	P	P	P	P	chr17	AK097622	TGAGATGCTGTGCAGTTATGACATATCCTCCCACCACAAAAGAACATTCCAGCTTGTCCA	1754	uc002ioy.1	UCSC_knowngene	-	47539111	47535222	noncoding	intergenic
ASHG19A3A029582	109.419	87.8009	104.861	155.103	135.269	143.374	143.725	6.87714	6.57114	6.85283	7.18822	7.05589	7.10966	7.02808	P	P	P	P	P	P	P	chr6		CTCTGGTGTCAAATAACATCTGAGCTGTGATGAAAGACTTTCCCACACTCACTACATTGG	642	AX721103	misc_RNA	-	28084323	28083684	noncoding	intergenic
ASHG19A3L0001932	222.56	203.19	212.006	361.903	352.063	354.157	375.09	7.84195	7.71558	7.80898	8.48525	8.49583	8.47475	8.47645	P	P	P	P	P	P	P	chr7	lincRNA-ZNF92-3	TCCAGGCATTGCCACTCCTCCAAAGAGAATTCTATGGCCACATCCATAAATGTCAATGGT	234	BM682695	lincRNA	+	64467056	64442423	noncoding	natural antisense	NM_001007253	ERV3-1	HERV-R_7q21.2 provirus ancestral Env polyprotein	-	64450732	64467124
ASHG19A3L0001932	222.56	203.19	212.006	361.903	352.063	354.157	375.09	7.84195	7.71558	7.80898	8.48525	8.49583	8.47475	8.47645	P	P	P	P	P	P	P	chr7	lincRNA-ZNF92-3	TCCAGGCATTGCCACTCCTCCAAAGAGAATTCTATGGCCACATCCATAAATGTCAATGGT	234	BM682695	lincRNA	+	64467056	64442423	noncoding	natural antisense	NM_015852	ZNF117	zinc finger protein 117	-	64434829	64451414
ASHG19A3L0000430	47.6717	21.5429	41.457	63.0838	41.6881	31.2514	28.0993	5.716	4.69833	5.57186	5.84222	5.29335	4.84007	4.5547	A	P	P	P	P	P	P	chr12	lincRNA-CHST11	ATGTCACAGAGGATTTGGTGATCAAAGCCAGTGTCCCTCAGAATTTTTCTTCACCCTCGT	524	CA414224	lincRNA	+	104761388	104760577	noncoding	intergenic
ASHG19A3A015679	122.969	98.6766	123.024	229.039	214.501	147.02	237.621	7.03892	6.73605	7.07104	7.78257	7.75352	7.15153	7.79021	P	P	P	P	P	P	P	chr2	AC007092.1	TCATCCTCATTGTACTCCCTTGGCATCTCATGGTGACGTGACTTAGAAGGTGGTGCAGAG	4077	ENST00000452840	Ensembl	+	59290901	58655472	noncoding	intergenic
ASHG19A3A032429	24.4118	8.71949	19.8359	34.1913	39.0855	19.4769	34.2655	4.77883	3.62336	4.5576	4.91931	5.197	4.11946	4.86309	A	P	P	P	P	P	P	chr7		TCAAGGTTGGCCTGTCCTTTGGTTTTAAAACAAAGACGGAGAATTTTGTCAGTCGGGAGG	2637	AK125308	misc_RNA	-	5468558	5465915	noncoding	intergenic
ASHG19A3L0003567	106.689	94.079	119.668	114.42	168.522	107.741	227.096	6.84405	6.6725	7.03152	6.7275	7.39063	6.68157	7.71659	P	P	P	P	P	P	P	chr3	lincRNA-MECOM-1	GTCTTCAGGATTCCTTTTGCCTTGCTTTGTCTGTTGTGAGTATATTTGCATGAAAACAGG	5319	chr3:168554930-168560248+	lincRNA	+	168560248	168554930	noncoding	intergenic
ASHG19A3A019820	61.066	51.0484	54.2725	79.8628	80.55	77.1252	118.301	6.05898	5.83835	5.94143	6.20364	6.27987	6.18627	6.72953	P	P	P	P	P	P	P	chr22		GGGGTCTGCTGAATTGGCTTCTTTTCTTTTGAACTTAATAATAATGAGACATAATAGGTG	2052	AK074445	misc_RNA	-	39570674	39568642	noncoding	intergenic
ASHG19A3A018947	104.795	110.095	104.972	43.389	42.7282	46.9111	58.3666	6.8201	6.8832	6.85426	5.27736	5.32744	5.44927	5.66753	P	P	P	P	P	P	P	chr21	C21orf84	GGAAGACCTGTTTCTTTTACTTTCCTTGAGGAGAAAAAATTAAAGTTCTGAGCAAACGCA	967	ENST00000427188	Ensembl	-	44891472	44890312	noncoding	intergenic
ASHG19A3A052161	17.5295	6.01713	9.03177	66.6514	17.9695	46.0333	26.111	4.29479	3.18995	3.48203	5.92276	4.02651	5.42184	4.44281	A	A	A	P	P	P	P	chr15		AATGAGTTTCAACTGACTCTTATTTCAGTCCTTTTTCTACGTGGCTGCCAGGTCTAATTT	2648	AK127446	misc_RNA	-	54981739	54979064	noncoding	intergenic
ASHG19A3L0000596	25.9914	39.0897	37.2452	95.0061	28.321	70.5562	45.1047	4.87206	5.48004	5.42412	6.46198	4.71475	6.0627	5.28001	P	P	P	P	P	P	P	chr13	lincRNA-SGCG-4	ATTCATGCTTCATGGTACCAATGTGCTCCTCACTGTAGCAGTGCTGACATTCCATCTCAA	11701	chr13:22305525-22317225+	lincRNA	+	22317225	22305525	noncoding	intergenic
ASHG19A3A042612	5	14.2706	19.9462	51.6248	39.1177	42.9577	53.4837	2.37766	4.18933	4.5646	5.54591	5.19803	5.3157	5.53855	A	A	P	P	P	P	P	chr10	RP11-342D11.3	TTGACCAGAAGCCGTGTTTTGTGGGATTGCCACTTTAATCGCTCCTGTTCATCATTAGGA	552	ENST00000414308	Ensembl	-	33405600	33385184	noncoding	intergenic
ASHG19A3A041680	183.341	156.63	169.546	521.221	478.41	436.402	494.267	7.57948	7.36227	7.5059	9.05378	8.97131	8.79324	8.9067	P	P	P	P	P	P	P	chrX	LOC100272228	ATGGATTTCCAAATCTGACACACCATAGCCTGAATTCTCACCAGTTTGCTCCTGGAAAGG	3285	NR_027456	RefSeq_NR	+	149185018	149106765	noncoding	bidirectional	NM_001013845	CXorf40B	protein CXorf40B	-	149100414	149106716
ASHG19A3L0001018	65.9281	63.4521	72.4608	75.3623	100.306	71.5934	126.564	6.173	6.12869	6.34046	6.11286	6.6039	6.08557	6.82583	P	P	P	P	P	P	P	chr19	lincRNA-INSR	TGGGACCTTCCATGACATCTGGACTAATTCCTTCACTGCTTGCATCTCAGTGTCTTTTTT	328	BI024558	lincRNA	-	7430546	7430216	noncoding	intergenic
ASHG19A3A000482	761.647	746.052	803.496	554.829	635.997	703.083	628.543	9.48473	9.46631	9.61652	9.14693	9.40352	9.52701	9.27119	P	P	P	P	P	P	P	chr6	AL358933.1	AGAAAACGGACGGAAGAAAAGGTCTGGCCGGAGATGGGTCTCACTCTGTCACCCAGACTG	1517	ENST00000510652	Ensembl	-	28104644	28089594	noncoding	intronic antisense	NM_025231	ZSCAN16	zinc finger and SCAN domain-containing protein	+	28092386	28097856
ASHG19A3L0003212	326.816	326.825	321.08	265.912	340.841	402.145	393.562	8.36219	8.35399	8.37167	8.01212	8.45243	8.6702	8.54836	P	P	P	P	P	P	P	chr8	lincRNA-MYC-1	GTCAGAGACATAGAGTTATTATCATCTCATCTCAGAATACTCTCCTCCTTCATTTCCATC	8991	chr8:129178878-129187868-	lincRNA	-	129187868	129178878	noncoding	intergenic
ASHG19A3A007222	227.883	214.401	229.224	166.788	238.467	257.138	245.782	7.87116	7.78633	7.90466	7.30048	7.91448	7.99604	7.84195	P	P	P	P	P	P	P	chr6	HCG18	TTAGCCTTTTAACATTCAAGGATTAGAGCTCCCTCTTTGCCCACTAGCAGGGCATTAGCT	6600	NR_024053	RefSeq_NR	-	30294927	30255173	noncoding	natural antisense	NM_021253	TRIM39	tripartite motif-containing protein 39 isoform	+	30294620	30311506
ASHG19A3A007222	227.883	214.401	229.224	166.788	238.467	257.138	245.782	7.87116	7.78633	7.90466	7.30048	7.91448	7.99604	7.84195	P	P	P	P	P	P	P	chr6	HCG18	TTAGCCTTTTAACATTCAAGGATTAGAGCTCCCTCTTTGCCCACTAGCAGGGCATTAGCT	6600	NR_024053	RefSeq_NR	-	30294927	30255173	noncoding	bidirectional	NM_172016	TRIM39	tripartite motif-containing protein 39 isoform	+	30295007	30311506
ASHG19A3A052889	154.045	124.146	139.228	99.4051	66.2555	86.0915	96.2977	7.34123	7.04625	7.24141	6.52521	5.99131	6.34687	6.412	P	P	P	P	P	P	P	chr15	AC012170.2	ACTATCTGGAAAACTGTGCTAATAGTGCCTGATCTACACAAATTTAAGTGACTATACCCC	3624	ENST00000500703	Ensembl	+	50660476	50655997	noncoding	intergenic
ASHG19A3A026009	463.946	416.459	431.255	106.696	85.0183	90.3493	109.473	8.83449	8.68568	8.77259	6.62838	6.35984	6.41886	6.6101	P	P	P	P	P	P	P	chr4	AK090904	ATACTCATGTTTTCTAACAAAACAGCTTTGGATTTATAATGCTGCCAGATGTCATTACAA	2962	uc003ifn.2	UCSC_knowngene	+	128761883	128758921	noncoding	intergenic
ASHG19A3L0001890	1403.62	1375.17	1328.37	1611.69	1109.5	881.652	1044.79	10.3179	10.292	10.3032	10.7464	10.2292	9.85174	10.0478	P	P	P	P	P	P	P	chr7	lincRNA-RNF32-3	ATTGACTAAGGAAAGGAGAAAATGGAAGAAGAACCCCCTCCTGCTTAGATGCAGTCATTT	2538	AK124321	lincRNA	+	155759037	155755325	noncoding	intergenic
ASHG19A3A040154	49.3232	9.13361	42.4008	52.2674	22.0227	15.8331	32.1039	5.7673	3.67245	5.60288	5.56404	4.33393	3.79183	4.76475	A	P	P	P	P	P	P	chrX		AATTTATTCTCCTGATCTAACTGTAGATATCATTAGTTTTTTGTTTGTTTGCTCCTTCTT	1824	AK055743	misc_RNA	-	93648287	93646477	noncoding	intergenic
ASHG19A3A024341	10054.4	10140.4	9934.12	3990.25	3490.31	3687.98	4031.75	13.0958	13.1241	13.1392	12.0729	11.9083	11.9599	12.0197	P	P	P	P	P	P	P	chr4		GTATCAACTTAGCAAACCAAGTCCAAAACATTTTATATGTGTCTATCTTTCCTGCTGTTC	578	AF086310	misc_RNA	-	76007705	76007137	noncoding	intergenic
ASHG19A3L0001153	39.8852	23.8372	35.748	56.5573	45.8405	39.0774	45.6965	5.4628	4.82655	5.36614	5.67431	5.43728	5.17584	5.2978	A	P	P	P	P	P	P	chr2	lincRNA-SP100	ATGTTCTTATGATGTCAAAGGTTAAAAGGCCTGGGGCCATGGTCTGGCTTGCTTTGTTCT	11126	chr2:231539456-231550581-	lincRNA	-	231550581	231539456	noncoding	intergenic
ASHG19A3L0002865	19.1772	13.1229	19.1891	13.3063	43.3024	32.5902	33.5763	4.42858	4.0893	4.51092	3.45516	5.34738	4.90086	4.82962	A	P	P	P	P	P	A	chrX	lincRNA-MAGEE2-2	CAAGGTTTTTAGTGGCACCATCCTGCAAGTGGAATCCTTAATCCAGTAAAATATCTTTGC	61742	chrX:75325098-75386839-	lincRNA	-	75386839	75325098	noncoding	intergenic
ASHG19A3A024698	22.8965	22.9851	12.4777	25.8912	36.6022	33.5849	35.4704	4.68528	4.77947	3.91523	4.50163	5.096	4.94424	4.91682	A	P	A	P	P	P	P	chr4	CTD-2325B11.1	AATTGGCTGACCATGGAACACCTAACCCGAAAATATGCATATCCCTTTCAGAGGGCAAAA	430	ENST00000507299	Ensembl	-	125173199	125070531	noncoding	intergenic
ASHG19A3L0000303	90.4322	90.4683	89.5481	36.85	44.7306	39.0767	48.4505	6.61378	6.61577	6.63758	5.03021	5.399	5.17565	5.38654	P	P	P	P	P	P	P	chr11	lincRNA-RDX-2	CTATGTATCTAATGTGCTGTGAACTGATAAAACCTGGATCTAAACAGCCTCTGTAAAAAA	692	BU626341	lincRNA	+	110091622	110090981	noncoding	intergenic
ASHG19A3L0002803	23.7098	30.8433	20.1643	24.2766	16.8228	20.8967	24.712	4.7355	5.16349	4.58019	4.39931	3.92212	4.22869	4.36328	P	P	P	P	P	P	P	chr3	lincRNA-TRIM71-1	TTAAGAGGTTTAACTTAGTCATTCTAACATAAGGCAACTTGCCCACATTAATTCCCCCAA	613	BF057073	lincRNA	-	32939316	32938705	noncoding	intergenic
ASHG19A3L0001533	83.8488	73.6944	84.6797	70.9902	148.48	154.209	182.741	6.51472	6.33105	6.56325	6.02053	7.19831	7.22383	7.38717	P	P	P	P	P	P	P	chr4	lincRNA-ANXA3-2	TCCTTCTCCTGATCTGTTGGCCTCTCTAGAGGCACTGTTGTCCCATCATGGGAACTATCC	11051	chr4:79623626-79634676-	lincRNA	-	79634676	79623626	noncoding	intergenic
ASHG19A3A024184	61.1924	52.7076	59.4821	17.0815	14.1602	15.6168	15.9612	6.06165	5.87867	6.06766	3.85573	3.64634	3.76641	3.66691	P	P	P	A	A	P	P	chr4	RP11-89B16.2	ATTCTGATTTCCTAACTTCAATGAGCCAAACTCAGAGTATAGCAACCAGCAGGCGCCCAA	640	ENST00000508433	Ensembl	-	54794305	54793665	noncoding	intergenic
ASHG19A3A030672	93.6187	97.4833	91.2981	201.36	85.9646	32.162	73.9	6.66725	6.71988	6.65913	7.58262	6.37518	4.88138	6.02067	P	P	P	P	P	P	P	chr6	RP11-631F7.1	GGTGAATAGCTGCCAAGTGGTGGAGGTTGGCCTGCAGTGAGCATCAGTCTGACTTCGAAG	311	ENST00000423268	Ensembl	-	148604544	148558720	noncoding	intergenic
ASHG19A3A045869	7.6927	8.15899	7.93871	36.3316	39.0535	29.9369	33.6151	3.1607	3.55211	3.3095	5.0104	5.19574	4.77653	4.83234	A	A	A	P	P	P	P	chr11	AP003500.1	CTCTAAAGGGCCCAGTAGTCATTCCTCAGTGAAAAGTGCCAATTCATTGCTTGGTAGATT	973	ENST00000511090	Ensembl	-	129487164	129482019	noncoding	intergenic
ASHG19A3A036526	1196.21	1211.77	1232.68	177.11	161.369	193.487	205.845	10.0959	10.1245	10.1982	7.39287	7.3265	7.56418	7.57048	P	P	P	P	P	P	P	chr8	BC034319	CTGCAGGTTAAGAGAAATTGAGAAACGATGGAGAATTTAAGTGTTTTAGATCCTACATAC	837	uc003xjb.2	UCSC_knowngene	+	32902372	32785487	noncoding	intergenic
ASHG19A3L0000014	218.577	178.296	232.1	208.957	310.63	194.203	380.982	7.81525	7.53642	7.92137	7.63761	8.3102	7.57066	8.50257	P	P	P	P	P	P	P	chr1	lincRNA-CD53	AGTTATAGATCTCAAACTAATCCCAGTCCCTTACCTATATCACCCCTTAGCTGATCTAAT	685	BX478947	lincRNA	-	111460747	111460165	noncoding	intergenic
ASHG19A3A025718	269.418	270.958	265.316	36.0256	40.0404	38.2646	54.0496	8.09076	8.09866	8.10894	4.99951	5.23076	5.14372	5.55199	P	P	P	P	P	P	P	chr4	AK130099	AAAGGCATCCGAATGGTCTAAGTAATGCCATCCATCTGTCAGTAATAGATTCAGAAATGG	2778	uc003hlf.2	UCSC_knowngene	+	79604337	79567337	noncoding	intergenic
ASHG19A3A033187	90.1344	90.2607	82.1808	78.9764	98.3128	91.5073	102.333	6.6101	6.6101	6.52022	6.18522	6.57454	6.43806	6.50359	P	P	P	P	P	P	P	chr7	AK310300	ATCATCTCTACCCATAAAAGATGGCATTCTGCAAGACTGAGAAGATGCCCACCTCCATTC	1228	uc010lfm.1	UCSC_knowngene	-	96293650	96251317	noncoding	intergenic
ASHG19A3L0001262	38.0342	43.9854	30.769	41.2055	56.5898	29.2317	117.865	5.39718	5.63551	5.16077	5.20033	5.75336	4.73758	6.72404	P	P	P	P	M	P	P	chr20	lincRNA-PTPN1-2	GTGGAAGACAAACACTAAGCACACACAAGTGAACAAGCGAGCCAAAAAAAATACAGCTTC	141	exon2440+	lincRNA	+	49051736	49051596	noncoding
ASHG19A3A024385	1328.84	1249.56	1147.44	883.418	745.043	848.602	795.223	10.2471	10.1676	10.102	9.85562	9.63726	9.79921	9.62574	P	P	P	P	P	P	P	chr4	RP11-792D21.1	TGTGTATTAGGAATTCTGGGCAAAGCCTAAGCCTTGGAAGGAGGATGCTGTCTTGATCTT	289	ENST00000509878	Ensembl	-	79570396	79570107	noncoding	intergenic
ASHG19A3L0001759	457.507	462.149	416.44	1801.59	616.506	2126.3	777.375	8.81871	8.82406	8.7316	10.9074	9.35506	11.1612	9.59277	P	P	P	P	P	P	P	chr6	lincRNA-FRMD1-1	TGGGGTCCCTGCCCCGGGCTAAGTGCACCCTGCCTGCCTTCTGGAGGGAGCATTGGGCTT	439	AI354683	lincRNA	-	168502166	168501721	noncoding	intergenic
ASHG19A3L0001596	43.5898	23.6433	27.636	39.0659	49.0041	10.3127	56.9432	5.59083	4.81685	5.01225	5.12177	5.53383	3.11797	5.63354	A	P	P	P	P	A	P	chr5	lincRNA-GRIA1	ACCAATTTGCCTTTCCAGGGGAAACCATTTGGGGCGGAAATCCCAATTTTTTCCAAAAAA	1114	CU693173	lincRNA	-	153433272	153311396	noncoding	natural antisense	NM_005927	MFAP3	microfibril-associated glycoprotein 3 isoform 1	+	153418518	153437014
ASHG19A3L0001596	43.5898	23.6433	27.636	39.0659	49.0041	10.3127	56.9432	5.59083	4.81685	5.01225	5.12177	5.53383	3.11797	5.63354	A	P	P	P	P	A	P	chr5	lincRNA-GRIA1	ACCAATTTGCCTTTCCAGGGGAAACCATTTGGGGCGGAAATCCCAATTTTTTCCAAAAAA	1114	CU693173	lincRNA	-	153433272	153311396	noncoding	natural antisense	NM_001135037	MFAP3	microfibril-associated glycoprotein 3 isoform 2	+	153418518	153437014
ASHG19A3L0001596	43.5898	23.6433	27.636	39.0659	49.0041	10.3127	56.9432	5.59083	4.81685	5.01225	5.12177	5.53383	3.11797	5.63354	A	P	P	P	P	A	P	chr5	lincRNA-GRIA1	ACCAATTTGCCTTTCCAGGGGAAACCATTTGGGGCGGAAATCCCAATTTTTTCCAAAAAA	1114	CU693173	lincRNA	-	153433272	153311396	noncoding	intron sense-overlapping	NM_018691	FAM114A2	hypothetical protein LOC10827	-	153371268	153418497
ASHG19A3L0001408	30.0107	23.8538	27.2077	28.3923	31.7584	26.1801	41.2728	5.07021	4.8277	4.99198	4.63996	4.8841	4.57221	5.14803	A	P	P	P	P	P	P	chr3	lincRNA-SUCLG2-3	AGTTCTGTTAGCTATGGTGATTTCATTTAAATCTATGCCGTCACTTCTGGTTTGAGCTTG	19576	chr3:67128385-67147960+	lincRNA	+	67147960	67128385	noncoding	intergenic
ASHG19A3A032658	86.0065	80.6322	85.0722	102.835	103.578	73.8184	100.886	6.54782	6.45417	6.56935	6.57466	6.65527	6.12593	6.48088	P	P	P	P	P	P	P	chr7	RP11-89N17.4	TAACACATGGTACAAAGTCATGACGAGAAGACATGTGCCCCCTGGCCAAAACTATTCAAC	1589	ENST00000420185	Ensembl	-	33842742	33832779	noncoding	intergenic
ASHG19A3L0002100	22.5312	16.5921	27.5713	42.8561	32.3672	26.5551	32.233	4.65906	4.37474	5.00837	5.25672	4.9137	4.59426	4.77094	A	P	P	P	P	P	P	chr8	lincRNA-FAM110B-3	AACTTTTTAGACTTGACTCTGGACTGCAGTTTCCAGTTTCCACCATCAATCTTTACATAC	14026	chr8:58737821-58751846+	lincRNA	+	58751846	58737821	noncoding	intergenic
ASHG19A3L0002586	3334.31	3509.36	3289.86	1868.24	1787.75	1782.05	1860.24	11.5464	11.6207	11.5859	10.9624	10.9297	10.9004	10.898	P	P	P	P	P	P	P	chr3	lincRNA-FBLN2-2	AGCCCAGGGCTCACACTGCGTGGGAGGGACTGGGTCACTATTGTGGTTTTTACTATAACT	3873	AK304777	lincRNA	+	13679512	13573823	noncoding	exon sense-overlapping	NM_001165035	FBLN2	fibulin-2 isoform a precursor	+	13610239	13679922
ASHG19A3L0002586	3334.31	3509.36	3289.86	1868.24	1787.75	1782.05	1860.24	11.5464	11.6207	11.5859	10.9624	10.9297	10.9004	10.898	P	P	P	P	P	P	P	chr3	lincRNA-FBLN2-2	AGCCCAGGGCTCACACTGCGTGGGAGGGACTGGGTCACTATTGTGGTTTTTACTATAACT	3873	AK304777	lincRNA	+	13679512	13573823	noncoding	exon sense-overlapping	NM_001004019	FBLN2	fibulin-2 isoform a precursor	+	13590624	13679922
ASHG19A3L0002586	3334.31	3509.36	3289.86	1868.24	1787.75	1782.05	1860.24	11.5464	11.6207	11.5859	10.9624	10.9297	10.9004	10.898	P	P	P	P	P	P	P	chr3	lincRNA-FBLN2-2	AGCCCAGGGCTCACACTGCGTGGGAGGGACTGGGTCACTATTGTGGTTTTTACTATAACT	3873	AK304777	lincRNA	+	13679512	13573823	noncoding	exon sense-overlapping	NM_001998	FBLN2	fibulin-2 isoform b precursor	+	13590624	13679922
ASHG19A3L0003083	1754.64	1638.92	1396.23	771.537	1707.77	1770.89	2059.92	10.6262	10.5368	10.3731	9.64759	10.8639	10.8917	11.0529	P	P	P	P	P	P	A	chr9	lincRNA-NTRK2	GAAAAAACAAATAAAATTAAGGCTATCTTTAAGTTAACAAACACCACCCTCCCACCCAAC	13051	chr9:87653896-87666946-	lincRNA	-	87666946	87653896	noncoding	intergenic
ASHG19A3L0000538	27384.9	32703.8	26443.6	29371.9	9932.23	5160.74	7313.14	14.4931	14.7758	14.5044	15.0452	13.4553	12.4574	12.9027	P	P	P	P	P	P	P	chr12	lincRNA-ALX1-1	AACCCCTTAAAAATCTCCCTCCTATTTAACAAGGTTCCCGGGTTTTTGGATTGGAAAAAA	808	CD242216	lincRNA	-	86094916	86094197	noncoding	intergenic
ASHG19A3L0001241	2561.9	2637.29	2246.98	2491.71	1231.87	1264.59	1488.48	11.1738	11.2147	11.0448	11.383	10.3851	10.4079	10.5782	P	P	P	P	P	P	P	chr20	lincRNA-STK35	GCTCCCTCCTCTGCAACTCACCTATGCTTTCATTCTGAGCTATGGGCAGGAGGAGGTGAC	12876	chr20:2142500-2155375-	lincRNA	-	2155375	2142500	noncoding	intergenic
ASHG19A3A040585	78.2656	70.0542	69.9568	222.347	214.779	195.899	213.16	6.42403	6.26385	6.29063	7.73489	7.75517	7.58367	7.62079	P	P	P	P	P	P	P	chr1	CR625980	CTAGCAATGGAGTGTTACAAGTAATAGACCCTAAAATGTGGATTGGCAAATTGCAGGTAG	1385	uc001hor.1	UCSC_knowngene	+	224709674	224622613	noncoding	bidirectional	NM_001115113	WDR26	WD repeat-containing protein 26 isoform b	-	224572844	224622001
ASHG19A3A040585	78.2656	70.0542	69.9568	222.347	214.779	195.899	213.16	6.42403	6.26385	6.29063	7.73489	7.75517	7.58367	7.62079	P	P	P	P	P	P	P	chr1	CR625980	CTAGCAATGGAGTGTTACAAGTAATAGACCCTAAAATGTGGATTGGCAAATTGCAGGTAG	1385	uc001hor.1	UCSC_knowngene	+	224709674	224622613	noncoding	bidirectional	NM_025160	WDR26	WD repeat-containing protein 26 isoform a	-	224572844	224622001
ASHG19A3L0000189	41.7357	41.2472	46.9231	82.4395	93.9354	64.4375	128.779	5.52596	5.5517	5.74193	6.25197	6.51203	5.92416	6.85259	P	P	P	P	P	P	P	chr10	lincRNA-PAX2-3	AAGCCTGTATTCCTTCTGCTATCAGACAGAACAAGCCCTTCACAATAGGAAGTTCCCTTC	10426	chr10:102402035-102412460+	lincRNA	+	102412460	102402035	noncoding	intergenic
ASHG19A3A049571	17.7088	16.7131	23.6714	48.6322	62.9474	72.757	77.3256	4.31066	4.38338	4.79121	5.44927	5.91849	6.10579	6.08883	A	P	P	P	P	P	P	chr13		TAATTCGATGCTACTGCTGCCAAAGCCACATGGGATGCAAATGAAACTGGGTTCACCTTT	1009	CR625221	misc_RNA	-	50953503	50952494	noncoding	intergenic
ASHG19A3L0001315	193.669	174.396	185.81	202.13	296.984	306.033	326.398	7.65864	7.50731	7.63297	7.58873	8.24723	8.26346	8.26962	P	P	P	P	P	P	P	chr3	lincRNA-IL20RB-1	AAAGTCACCATGATTTCAATTCCGTCTCTCGTTTCTGATCCTCTCTGCACATCTGCTTTA	18451	chr3:136790035-136808485-	lincRNA	-	136808485	136790035	noncoding	intergenic
ASHG19A3L0002692	52.6168	67.8381	63.2621	139.525	42.9161	112.484	64.5315	5.85436	6.21918	6.15325	7.02496	5.33416	6.74199	5.81985	P	P	P	P	P	P	P	chr19	lincRNA-ZSWIM4-2	AACTCGGTGTTTCTCTACGTCTAACTCTCCTTCTTGCTGCAACGCATTTGCCGGGGCGGG	446	BE043072	lincRNA	-	13991569	13972876	noncoding	natural antisense	NM_001098622	NANOS3	nanos homolog 3	+	13987949	13991571
ASHG19A3A033498	40.669	31.9973	27.6833	35.7812	20.7144	25.2754	84.7112	5.48835	5.21507	5.01454	4.98837	4.24907	4.51867	6.22563	P	P	P	P	P	P	P	chr7		GTGATCCTTTGCTTGGCTCTGAAGGAGCAGTGTTTTATATGTAAAGAATATATTCTGTAT	6285	CR936803	misc_RNA	-	127943939	127937737	noncoding	intergenic
ASHG19A3L0001738	35.5509	39.5713	48.155	167.609	32.8648	121.479	46.4782	5.30931	5.4953	5.77997	7.30848	4.93405	6.86547	5.32465	P	P	P	P	P	P	P	chr6	lincRNA-CITED2-1	GCTGTTTTAAGGTTCTGGATTTTTACCTGCCACTTTCTAGCTCTGAACTTTAATTTGATA	18426	chr6:140218607-140237032-	lincRNA	-	140237032	140218607	noncoding	intergenic
ASHG19A3A028237	49.8179	69.7552	66.2113	95.9486	45.1388	91.0575	47.0846	5.77821	6.25848	6.21242	6.4748	5.41488	6.43082	5.34666	P	P	P	P	P	P	P	chr5	CTC-236F12.1	TAATTACAGGTTGGCTTGTTTTGTTGCGCAATAGTGCCCCAGCCCGGATGAATGTCATTT	712	ENST00000512947	Ensembl	+	55750364	55749652	noncoding	intergenic
ASHG19A3L0002779	554.047	495.425	491.102	540.593	314.544	178.078	306.158	9.06085	8.9135	8.94392	9.10742	8.33111	7.43956	8.17536	P	P	P	P	P	P	P	chr15	lincRNA-PRTG	GTCCTCTAGGATTTTACATTCTTAGTTATCCATCCCCCCTGGCATTTTCAAACTATCTCT	4470	chr15:56088155-56092624-	lincRNA	-	56092624	56088155	noncoding	intergenic
ASHG19A3L0000138	116.353	27.5367	97.9204	112.725	45.6921	43.1319	53.788	6.96134	5.01554	6.75808	6.70697	5.43233	5.32113	5.54562	P	P	P	P	P	P	P	chr1	lincRNA-DMBX1	TTTCTGTTTCCAAGACAGGCTTTGCTACTACTCTGCCATGACCCAGACACTTCCCACCAG	161	exon94-	lincRNA	-	46997156	46996996	noncoding
ASHG19A3L0002469	168.613	130.114	161.919	243.723	169.804	114.733	167.299	7.46852	7.11194	7.44255	7.87986	7.40017	6.77343	7.2499	P	P	P	P	P	P	P	chr1	lincRNA-YTHDF2	TAGTTGCCGTCTCACCTGTTATACCCCCTTATACTCCAAATATTTAAAACACAGCAGACT	15459	chr1:29096302-29111760-	lincRNA	-	29111760	29096302	noncoding	intergenic
ASHG19A3A019919	36.0131	41.9248	37.3063	14.8068	12.2716	9.22538	26.3603	5.32676	5.57375	5.42582	3.63023	3.41369	2.9607	4.45727	P	P	P	P	A	A	P	chr22		TTTTTGTTTCTTCCAGACGAATACCAACACTGAAGGAGAATGATGACGGTGTTGGGGGCT	6475	AB051448	NRED	-	45476304	45373647	noncoding	intron sense-overlapping	NM_138415	PHF21B	PHD finger protein 21B isoform 1	-	45277042	45405581
ASHG19A3A019919	36.0131	41.9248	37.3063	14.8068	12.2716	9.22538	26.3603	5.32676	5.57375	5.42582	3.63023	3.41369	2.9607	4.45727	P	P	P	P	A	A	P	chr22		TTTTTGTTTCTTCCAGACGAATACCAACACTGAAGGAGAATGATGACGGTGTTGGGGGCT	6475	AB051448	NRED	-	45476304	45373647	noncoding	intron sense-overlapping	NM_001135862	PHF21B	PHD finger protein 21B isoform 2	-	45277042	45405809
ASHG19A3A029583	41.9851	42.1844	45.9444	51.0949	64.4731	43.5268	69.8822	5.53539	5.58355	5.71459	5.53174	5.9514	5.33655	5.93677	P	P	P	P	P	P	P	chr6	AK127889	ATGCCAGACAGTGTTTCTTGGGATCCATCCAAATAGGTCCCTTATTTCTCTTTGTGGGAG	2163	uc003nkk.1	UCSC_knowngene	-	28105071	28089572	noncoding	natural antisense	NM_025231	ZSCAN16	zinc finger and SCAN domain-containing protein	+	28092386	28097856
ASHG19A3L0002682	37.5293	37.939	39.0257	48.8556	55.7063	46.2318	65.4502	5.38003	5.44152	5.49083	5.4579	5.73013	5.42845	5.83819	P	P	P	P	P	P	P	chr4	lincRNA-TTC29-1	TGGCATCATCCTTTCTCAGGCCTGCTGTATAGCTTTCATTTTTAATAACATTTGAGTCTA	43974	chr4:147979327-148023300-	lincRNA	-	148023300	147979327	noncoding	intergenic
ASHG19A3L0002652	15.7469	9.47979	11.927	23.0555	30.1375	24.2086	39.6368	4.14144	3.71352	3.8563	4.3202	4.80636	4.45634	5.0827	A	A	A	P	P	P	P	chr8	lincRNA-ADRB3-1	GGACTCATCCAAGCTCCAGATTCTGATTTCACCGCTTTATACCGGAGAAGCATTTTCAGT	16992	chr8:37801630-37818621+	lincRNA	+	37818621	37801630	noncoding	intergenic
ASHG19A3L0001649	81.2528	64.8433	61.3717	69.9469	83.0451	62.365	108.685	6.47344	6.15703	6.11444	5.99843	6.32821	5.87275	6.59893	P	P	P	P	P	P	P	chr5	lincRNA-C9	AATCAGTATCTCTCCTTTGTTTCCACTGATGATCTAGGTCACTTAAAGGTCCAAATGTAT	568	AA777491	lincRNA	+	39256114	39255546	noncoding	intergenic
ASHG19A3L0001662	63.0578	48.3134	79.7397	123.024	200.268	136.665	215.501	6.10737	5.76215	6.47879	6.84326	7.64955	7.03767	7.63629	P	P	P	P	P	P	P	chr5	lincRNA-MAP3K1-3	TGATGCTTCTTTGGCCTCATTCTTCTCTGGCTTTCAGAGACCAGCCAGAAAATCACACAT	612	AW845646	lincRNA	+	55896968	55896358	noncoding	intergenic
ASHG19A3L0002952	11596.7	11469.4	11146.8	9136.28	11046.9	11133.6	11540.8	13.2946	13.2899	13.2874	13.3148	13.6226	13.5999	13.5878	P	P	P	P	P	P	P	chr1	lincRNA-SH3BP5L	TGGTGTGTAAGGGGGAAAGGGTCTTTCCTGGTTTTATTTAAATAAAGTAGTTTATGTAAC	3859	AK125138	lincRNA	-	249120832	249104650	noncoding	exon sense-overlapping	NM_030645	SH3BP5L	SH3 domain-binding protein 5-like	-	249104650	249120154
ASHG19A3A049662	12469.4	11819	11752.5	13958.5	13533.2	13741	13130.2	13.3877	13.3278	13.3663	13.9315	13.9181	13.9041	13.7664	P	P	P	P	P	P	P	chr13	RP11-505F3.4	TTAGTGGTGGAGTGTGTCATGAACCATGTCGCCTGTACTCGGATCTATGAAAAAGTAGAA	408	ENST00000420287	Ensembl	-	73675123	73674715	noncoding	intergenic
ASHG19A3L0002448	32.764	5.17045	33.8573	32.1862	20.4547	9.77235	17.0941	5.19042	2.32884	5.28704	4.83083	4.23018	3.03973	3.78037	A	P	P	P	P	A	P	chr1	lincRNA-C1orf185	GGATAATCTTGCCAGATGTAGATTCACGCCTTGGGCTGTTTCTTTGCATATTTCATGGAG	564	DA479771	lincRNA	+	51524574	51443196	noncoding	intergenic
ASHG19A3A052309	244.633	232.984	244.373	113.848	106.495	111.215	114.302	7.9648	7.89932	7.99268	6.72022	6.69539	6.72696	6.67543	P	P	P	P	P	P	P	chr15	BC047537	GAGCGCCGTGAAGAAGCGGTTCTGCCGGGCCAGGTCCTGCCAGGGAGCCTTGGAGCAGTG	3969	uc002aqr.1	UCSC_knowngene	-	67814182	67697735	noncoding	natural antisense	NM_001031715	IQCH	IQ domain-containing protein H isoform 1	+	67547137	67794142
ASHG19A3A052309	244.633	232.984	244.373	113.848	106.495	111.215	114.302	7.9648	7.89932	7.99268	6.72022	6.69539	6.72696	6.67543	P	P	P	P	P	P	P	chr15	BC047537	GAGCGCCGTGAAGAAGCGGTTCTGCCGGGCCAGGTCCTGCCAGGGAGCCTTGGAGCAGTG	3969	uc002aqr.1	UCSC_knowngene	-	67814182	67697735	noncoding	natural antisense	NM_001143936	C15orf61	hypothetical protein LOC145853 precursor	+	67813521	67819641
ASHG19A3A016607	54735.3	58900.8	58052.1	43912.4	40265	45559	43721.3	15.4791	15.609	15.6372	15.6417	15.4791	15.6686	15.5374	P	P	P	P	P	P	P	chr2	RP11-1O7.1	AAGGAGACTGTATTAACCAAGTCTCCCTATCAGGAATTCACTGACCACTCCATCAAGACC	884	ENST00000433054	Ensembl	+	174163240	174162356	noncoding	intergenic
ASHG19A3L0002245	238.912	235.658	223.493	194.935	200.791	177.574	230.072	7.93722	7.91182	7.87315	7.5366	7.65442	7.43511	7.73575	P	P	P	P	P	P	P	chrX	lincRNA-AMOT-1	GATTTACTTTGAACAGTTTGCCTTAAAAACTACCTCCCGAATTTACTAAGGCCTTTTTCT	468	DB567533	lincRNA	-	113696298	113320730	noncoding	intergenic
ASHG19A3L0003505	92.4076	75.5775	89.5507	96.7546	118.995	91.3771	140.72	6.647	6.36666	6.63767	6.48709	6.86271	6.43599	6.99278	P	P	P	P	P	P	P	chr15	lincRNA-GJD2-1	AAAGATGACAATTATGTGGCACTGCCACAGAAAACCTCACTGTCTCATGCCCTGCAAAGA	10674	chr15:35025782-35036455+	lincRNA	+	35036455	35025782	noncoding	intergenic
ASHG19A3L0002588	83.9523	68.2668	85.5468	90.2703	138.687	162.902	158.842	6.51597	6.22798	6.5782	6.38945	7.09612	7.3078	7.17438	P	P	P	P	P	P	P	chr3	lincRNA-MAGI1-6	TCCCTCTGACAACCAGCCATCCTTCATCAATTTCCATAGTAATCATGGCTATTTATTCAG	18406	chr3:65301806-65320211+	lincRNA	+	65320211	65301806	noncoding	intergenic
ASHG19A3L0003327	5777.19	5926.4	5803.64	2390.69	2465.45	2735.36	2854.2	12.328	12.3792	12.3943	11.3315	11.4044	11.5266	11.5282	P	P	P	P	P	P	P	chr19	lincRNA-ZNF98	CTTATGAAACATAAGATAATTCATACTGGGGAGAAACCCTACAAATGTGAAGAATGTGGT	1988	chr19:22497397-22499384+	lincRNA	+	22499384	22497397	noncoding	intergenic
ASHG19A3A027053	63.6861	47.2435	48.7964	53.4098	57.1873	76.3813	81.3686	6.11953	5.7358	5.7972	5.59327	5.77183	6.17106	6.16891	P	P	P	P	P	P	P	chr5		GCATAATGTTTCATTAATTTTTTGCTGACAGATCCTTTCTCTCTAACGTAGCTCTCTGTG	3438	AK090538	misc_RNA	-	82323480	82320042	noncoding	intergenic
ASHG19A3L0000252	339.263	392.854	356.582	731.459	213.099	685.865	231.343	8.41327	8.60739	8.52263	9.56153	7.74228	9.48473	7.74435	P	P	P	P	P	P	P	chr10	lincRNA-PPYR1-2	AAGAACAGAGACTCACTCTGTCAAGTACACACCCACATCCCTCTTATCCCAAATACCAAA	385	AA564591	lincRNA	+	47220766	46744329	noncoding	intronic antisense	NM_001137548	FAM25C	hypothetical protein LOC644054	-	47177221	47181688
ASHG19A3L0000252	339.263	392.854	356.582	731.459	213.099	685.865	231.343	8.41327	8.60739	8.52263	9.56153	7.74228	9.48473	7.74435	P	P	P	P	P	P	P	chr10	lincRNA-PPYR1-2	AAGAACAGAGACTCACTCTGTCAAGTACACACCCACATCCCTCTTATCCCAAATACCAAA	385	AA564591	lincRNA	+	47220766	46744329	noncoding	intronic antisense	NM_031912	SYT15	synaptotagmin-15 isoform a	-	46957880	46970601
ASHG19A3L0000252	339.263	392.854	356.582	731.459	213.099	685.865	231.343	8.41327	8.60739	8.52263	9.56153	7.74228	9.48473	7.74435	P	P	P	P	P	P	P	chr10	lincRNA-PPYR1-2	AAGAACAGAGACTCACTCTGTCAAGTACACACCCACATCCCTCTTATCCCAAATACCAAA	385	AA564591	lincRNA	+	47220766	46744329	noncoding	intron sense-overlapping	NM_005972	PPYR1	neuropeptide Y receptor type 4	+	47083533	47088320
ASHG19A3L0000252	339.263	392.854	356.582	731.459	213.099	685.865	231.343	8.41327	8.60739	8.52263	9.56153	7.74228	9.48473	7.74435	P	P	P	P	P	P	P	chr10	lincRNA-PPYR1-2	AAGAACAGAGACTCACTCTGTCAAGTACACACCCACATCCCTCTTATCCCAAATACCAAA	385	AA564591	lincRNA	+	47220766	46744329	noncoding	intronic antisense	NM_001190810	AGAP9	"arf-GAP with GTPase, ANK repeat and PH"	-	47191843	47213626
ASHG19A3L0000252	339.263	392.854	356.582	731.459	213.099	685.865	231.343	8.41327	8.60739	8.52263	9.56153	7.74228	9.48473	7.74435	P	P	P	P	P	P	P	chr10	lincRNA-PPYR1-2	AAGAACAGAGACTCACTCTGTCAAGTACACACCCACATCCCTCTTATCCCAAATACCAAA	385	AA564591	lincRNA	+	47220766	46744329	noncoding	intronic antisense	NM_181519	SYT15	synaptotagmin-15 isoform b	-	46955443	46970601
ASHG19A3L0000252	339.263	392.854	356.582	731.459	213.099	685.865	231.343	8.41327	8.60739	8.52263	9.56153	7.74228	9.48473	7.74435	P	P	P	P	P	P	P	chr10	lincRNA-PPYR1-2	AAGAACAGAGACTCACTCTGTCAAGTACACACCCACATCCCTCTTATCCCAAATACCAAA	385	AA564591	lincRNA	+	47220766	46744329	noncoding	intronic antisense	NM_001040084	ANXA8	annexin A8	-	47157983	47174122
ASHG19A3L0000252	339.263	392.854	356.582	731.459	213.099	685.865	231.343	8.41327	8.60739	8.52263	9.56153	7.74228	9.48473	7.74435	P	P	P	P	P	P	P	chr10	lincRNA-PPYR1-2	AAGAACAGAGACTCACTCTGTCAAGTACACACCCACATCCCTCTTATCCCAAATACCAAA	385	AA564591	lincRNA	+	47220766	46744329	noncoding	intronic antisense	NM_001137556	FAM25B	hypothetical protein LOC100132929	-	47177221	47181688
ASHG19A3L0000252	339.263	392.854	356.582	731.459	213.099	685.865	231.343	8.41327	8.60739	8.52263	9.56153	7.74228	9.48473	7.74435	P	P	P	P	P	P	P	chr10	lincRNA-PPYR1-2	AAGAACAGAGACTCACTCTGTCAAGTACACACCCACATCCCTCTTATCCCAAATACCAAA	385	AA564591	lincRNA	+	47220766	46744329	noncoding	intronic antisense	NM_001098845	ANXA8L1	annexin A8-like protein 1	-	47157988	47174040
ASHG19A3L0000252	339.263	392.854	356.582	731.459	213.099	685.865	231.343	8.41327	8.60739	8.52263	9.56153	7.74228	9.48473	7.74435	P	P	P	P	P	P	P	chr10	lincRNA-PPYR1-2	AAGAACAGAGACTCACTCTGTCAAGTACACACCCACATCCCTCTTATCCCAAATACCAAA	385	AA564591	lincRNA	+	47220766	46744329	noncoding	intronic antisense	NM_001137549	FAM25G	hypothetical protein LOC100133093	-	47177221	47181688
ASHG19A3L0000252	339.263	392.854	356.582	731.459	213.099	685.865	231.343	8.41327	8.60739	8.52263	9.56153	7.74228	9.48473	7.74435	P	P	P	P	P	P	P	chr10	lincRNA-PPYR1-2	AAGAACAGAGACTCACTCTGTCAAGTACACACCCACATCCCTCTTATCCCAAATACCAAA	385	AA564591	lincRNA	+	47220766	46744329	noncoding	intron sense-overlapping	NM_014696	GPRIN2	G protein-regulated inducer of neurite outgrowth	+	46993545	47000568
ASHG19A3A041099	76.3229	68.0237	54.0629	136.18	59.2779	45.913	44.1262	6.38702	6.22236	5.93492	6.98877	5.82673	5.41757	5.24844	P	P	P	P	P	P	P	chrX	RP11-368D24__A.1	GGGAATCTTTTTTGCAAACAAAACTCTGGCCCATTAAGAACTCTCTGCTGCCTTGTGAAG	487	ENST00000429601	Ensembl	+	64820630	64808277	noncoding	intergenic
ASHG19A3L0003322	29.3101	24.17	22.1672	57.7945	52.8278	35.5549	74.7603	5.03553	4.84496	4.70382	5.7071	5.64644	5.03291	6.03905	A	P	P	P	P	P	P	chr6	lincRNA-QKI-1	GTAAAGCCCTCATTTGTGCATAACTCACACAAAGTATTCCAATTTAAAAATATCATGCTT	382	CD360025	lincRNA	-	164408977	164408611	noncoding	intergenic
ASHG19A3A050192	235.651	257.628	265.985	224.181	315.624	242.364	345.487	7.91977	8.02959	8.11295	7.74757	8.33712	7.90875	8.352	P	P	P	P	P	P	P	chr13	XTP6	TGCTTAAGAGGCATCACTGGAATCCTACGGTACCACAGACCAGAGCCTTCCCTTCCCTTC	1348	uc010tgn.1	UCSC_knowngene	+	51102670	50656413	noncoding	intergenic
ASHG19A3A043824	133.42	125.53	133.231	53.4446	54.2832	52.6305	55.3987	7.14599	7.06131	7.18211	5.5942	5.69099	5.62122	5.59042	P	P	P	P	P	P	P	chr1	RP5-884C9.3	GAAACCCAAAGAGACAAATCTGAAGAGACTCTGGATGAGGGTCCTCCAAAATACATAAAA	338	ENST00000424719	Ensembl	-	38546585	38546247	noncoding	intergenic
ASHG19A3L0002504	16.0205	14.4771	17.0076	33.5691	43.1833	25.0974	48.0498	4.16464	4.20812	4.34325	4.89113	5.34387	4.50935	5.37455	A	A	A	P	P	P	P	chr4	lincRNA-USP46-3	AATGGCTTGCTGTGTCAATTGCGTACCCCTATATGGATAAAACCAAGGAGGTTGTTGTGG	7967	chr4:53420371-53428337+	lincRNA	+	53428337	53420371	noncoding	intergenic
ASHG19A3A007941	936.348	952.392	1001.27	344.935	370.641	394.577	413.612	9.76971	9.79518	9.91849	8.4131	8.57214	8.6374	8.62285	P	P	P	P	P	P	P	chr1	RP3-471M13.1	AACACTATTAATGAGTGTGTGGCTCCATACCAAGGAGCTCCCTTTGAGGTGAAAGGGAAA	312	ENST00000425294	Ensembl	-	172855398	172855086	noncoding	intergenic
ASHG19A3A032615	5	5.1781	5	50.1194	39.3343	51.6924	44.6357	2.37766	2.32914	2.39437	5.50053	5.20582	5.59292	5.26734	A	A	A	P	P	P	P	chr7	AC007255.8	ATGTTTGCGAGTTTCAGGCGCCCTTAGTTGAAAGGCTGTAATTAACAAGTCCGCTGTTTG	889	ENST00000447171	Ensembl	-	29603279	29554384	noncoding	bidirectional	NM_175887	PRR15	proline-rich protein 15	+	29603426	29606911
ASHG19A3A054584	302.744	258.127	310.234	142.471	494.206	484.081	547.553	8.25478	8.0322	8.32984	7.0603	9.02434	8.95855	9.06355	P	P	P	P	P	P	P	chr16	AC007333.1	GTATCCCAGTTCCTCATGCTTGGCCCCAAACCTCTTTTTCACAGTAATAAAGAAAACACA	1972	ENST00000515084	Ensembl	+	52314201	52305527	noncoding	intergenic
ASHG19A3L0002544	94.2645	106.264	104.727	71.2988	20.0228	46.7321	23.9328	6.67793	6.83392	6.84936	6.02735	4.19773	5.44379	4.31153	P	P	P	P	P	P	P	chr7	lincRNA-THSD7A-2	CTTCATAAGGATATTTTTCAAGTTTGTGGGCTTGTCCTGGTACCTTCTACTGTGTAGAAG	1079	BM805159	lincRNA	+	11424086	11233008	noncoding	intronic antisense	NM_015204	THSD7A	thrombospondin type-1 domain-containing protein	-	11410061	11871824
ASHG19A3L0000059	1929.41	1984.96	1933.16	1831.75	773.349	1615.93	1230.42	10.7667	10.8171	10.831	10.9316	9.69215	10.765	10.3011	P	P	P	P	P	P	P	chr1	lincRNA-PTPRC-6	CACTCCCCCACTGAATCCTAAACCTAAAATGATTTGGAACCAAATTATGATTTGAAGGAT	17876	chr1:199663652-199681527-	lincRNA	-	199681527	199663652	noncoding	intergenic
ASHG19A3L0003064	40.0514	25.0175	31.2102	57.2818	33.1457	20.1412	27.0629	5.46935	4.8896	5.1798	5.69286	4.9461	4.17259	4.49501	A	P	P	P	P	P	P	chr6	lincRNA-PRL	ATGAGAATGATTAGCTCACCCCAATAGTATTTGCCAGCTCCAAATGGTCAAAGGGTTATA	6004	chr6:22320996-22326999-	lincRNA	-	22326999	22320996	noncoding	intergenic
ASHG19A3L0002227	19.1797	11.254	16.1029	23.5757	22.3364	27.9243	29.1249	4.42882	3.9109	4.27264	4.35435	4.35508	4.66958	4.61413	A	P	A	P	P	P	P	chr9	lincRNA-FOXE1-2	GGCTCATACCCTTAATCATTGCGTAATCTTTCTTTGCTATCAGATCCGAGACTGCAGAAA	879	BM008250	lincRNA	-	100641134	100639530	noncoding	intergenic
ASHG19A3L0000599	77.1798	64.8106	75.8686	94.9657	89.5919	102.556	104.288	6.40271	6.15653	6.4045	6.46116	6.43472	6.6078	6.53528	P	P	P	P	P	P	P	chr13	lincRNA-SACS	AGAACGACTTATGTATCAGACTTGGTCCCCTTGATTTTGTCATTCTTCAGTTCTTTTTTC	10951	chr13:24122375-24133325-	lincRNA	-	24133325	24122375	noncoding	intergenic
ASHG19A3L0003257	2696.15	2734.58	2521.06	2442.7	3308.77	3183.68	3378.83	11.2404	11.2645	11.2093	11.3557	11.8364	11.7532	11.7775	P	P	P	P	P	P	P	chr12	lincRNA-NR4A1	CTTCCTACCCTCCTTCCACATGTACATAAACTGTCACTCTAGGAAGAAGACAAATGACAG	3513	AK131566	lincRNA	+	52453285	52431498	noncoding	exon sense-overlapping	NM_001202233	NR4A1	nuclear receptor subfamily 4 group A member 1	+	52416615	52453291
ASHG19A3L0003257	2696.15	2734.58	2521.06	2442.7	3308.77	3183.68	3378.83	11.2404	11.2645	11.2093	11.3557	11.8364	11.7532	11.7775	P	P	P	P	P	P	P	chr12	lincRNA-NR4A1	CTTCCTACCCTCCTTCCACATGTACATAAACTGTCACTCTAGGAAGAAGACAAATGACAG	3513	AK131566	lincRNA	+	52453285	52431498	noncoding	exon sense-overlapping	NM_002135	NR4A1	nuclear receptor subfamily 4 group A member 1	+	52445185	52453291
ASHG19A3L0003257	2696.15	2734.58	2521.06	2442.7	3308.77	3183.68	3378.83	11.2404	11.2645	11.2093	11.3557	11.8364	11.7532	11.7775	P	P	P	P	P	P	P	chr12	lincRNA-NR4A1	CTTCCTACCCTCCTTCCACATGTACATAAACTGTCACTCTAGGAAGAAGACAAATGACAG	3513	AK131566	lincRNA	+	52453285	52431498	noncoding	exon sense-overlapping	NM_173157	NR4A1	nuclear receptor subfamily 4 group A member 1	+	52445185	52453291
ASHG19A3A015964	1322.74	1378.29	1200.99	1545.14	780.53	1340.35	988.136	10.2399	10.2957	10.1618	10.6933	9.70544	10.494	9.96404	P	P	P	P	P	P	P	chr2	IGKV1ORY-1	TATTACTGTCAACAGAGTGACAGTACCCCTCCCACAGCGTTACAAGTCATAACATAATCC	380	ENST00000455863	Ensembl	+	91679403	91678895	noncoding	intergenic
ASHG19A3L0001081	69.3554	75.6445	66.8834	104.73	37.1572	84.0484	44.6947	6.24706	6.36771	6.22798	6.60253	5.12047	6.30904	5.26924	P	P	P	P	P	P	P	chr2	lincRNA-ZEB2-7	CCTTCCCCACAAAATGGTTGGCATGCCCCACAAGGATTTTCATTTTATGGCCTTCAATTT	842	CD298737	lincRNA	-	145876453	145875822	noncoding	intergenic
ASHG19A3L0000903	28.4079	15.8582	18.6556	46.5316	23.9475	37.4385	25.79	4.99175	4.31453	4.46958	5.38354	4.4577	5.11051	4.42531	A	P	P	P	P	P	P	chr17	lincRNA-TMEM220	AGCCAGGTTCCTGAGAGACCAATATTCTGATACTCCATGTTTTCCTATAGGTGATCACTG	651	CA426679	lincRNA	-	10672388	10671753	noncoding	intergenic
ASHG19A3A020284	484.832	470.295	453.497	1517.05	1485.65	1502.41	1540.97	8.88666	8.84558	8.83925	10.6633	10.6658	10.6556	10.6305	P	P	P	P	P	P	P	chr22	LOC284900	AACCCAAAGTGACACATGCCTGGCGGGATGTTCAGTCTCTGTAAACCCATATGGTTTTTT	5125	NR_026963	RefSeq_NR	+	28398665	28315363	noncoding	bidirectional	NM_012399	PITPNB	phosphatidylinositol transfer protein beta	-	28247656	28315255
ASHG19A3A020284	484.832	470.295	453.497	1517.05	1485.65	1502.41	1540.97	8.88666	8.84558	8.83925	10.6633	10.6658	10.6556	10.6305	P	P	P	P	P	P	P	chr22	LOC284900	AACCCAAAGTGACACATGCCTGGCGGGATGTTCAGTCTCTGTAAACCCATATGGTTTTTT	5125	NR_026963	RefSeq_NR	+	28398665	28315363	noncoding	natural antisense	NM_001145418	TTC28	tetratricopeptide repeat protein 28	-	28374001	29075853
ASHG19A3A015745	48.3386	36.4656	45.4066	74.9016	58.152	79.872	84.1149	5.73601	5.3884	5.69923	6.10166	5.79674	6.23648	6.2173	P	P	P	P	P	P	P	chr2	AC074391.1	ATATAATCATCTTTCACATTCGGTTTGACTGTTTGGAGGCTGGAGCCTGTGTACTCCTCG	1266	ENST00000377977	Ensembl	+	65919319	65663863	noncoding	intergenic
ASHG19A3L0003450	71.8674	68.8717	68.3264	148.596	148.319	90.7952	163.292	6.30123	6.24	6.25756	7.12067	7.19675	6.4264	7.21537	P	P	P	P	P	P	P	chr10	lincRNA-SMNDC1-3	TCCTGCTTCTCCAGTTTTAAGACCAAGACCCAGTTTCAGGCCTATCAATGTCAAGGGGAA	602	CF129483	lincRNA	-	112163211	112160548	noncoding	intergenic
ASHG19A3L0003381	207.778	169.889	229.838	512.223	633.397	278.928	724.014	7.74912	7.47048	7.90875	9.02624	9.39697	8.12447	9.48898	P	P	P	P	P	P	P	chr5	lincRNA-NDFIP1	ACCCCTACCTTGAGTATCTCCTCAGACCATATATTCCCCTGGGATTTCCTCTTCATTTTC	7566	chr5:141438289-141445854+	lincRNA	+	141445854	141438289	noncoding	intergenic
ASHG19A3L0000887	22.2341	8.85354	19.4055	20.9414	24.1894	18.3838	31.5596	4.63843	3.63788	4.52829	4.17248	4.47377	4.029	4.73874	A	P	P	P	P	P	P	chr16	lincRNA-KCNG4	TCTGCAGCATCTGCAGATCACTGGGCACTCACCATCTACATATAGCTAGTTTGGTTTAGT	11151	chr16:84296674-84307824-	lincRNA	-	84307824	84296674	noncoding	intergenic
ASHG19A3L0000636	129.729	113.972	115.627	463.977	468.005	252.136	702.622	7.10871	6.92925	6.98373	8.86903	8.93888	7.97018	9.44623	P	P	P	P	P	P	P	chr13	lincRNA-RCBTB2-2	GACCTCAATTCTCATTGTCAGCTCAATTCCTCAGTTCTCTTCCATGTGATCTCAAGGCTT	282	BE048608	lincRNA	-	49130440	49130167	noncoding	intergenic
ASHG19A3A030704	19.3692	11.8914	17.9284	6.84791	12.704	20.5918	19.0076	4.44445	3.9768	4.41275	2.5917	3.47083	4.20626	3.94321	A	P	P	P	A	P	A	chr6	RP1-292B18.4	TATAATCATGGCACCCACGGCTTAAAAGTTGACAGTGAGAACAGCATTGAACAGCCTGCT	853	ENST00000415477	Ensembl	-	151549582	151409238	noncoding	intronic antisense	NM_015440	MTHFD1L	"monofunctional C1-tetrahydrofolate synthase,"	+	151186690	151423023
ASHG19A3A022387	70.194	50.3139	49.0501	65.447	115.311	116.519	140.645	6.26633	5.81637	5.80461	5.89537	6.81674	6.79925	6.99176	P	P	P	P	P	P	P	chr3	AC098973.2	AAACTCTATAGAATTATGATCTAGGTTTGACTGACTCCTGGCAAGAAGCCCTACCCGCCA	543	ENST00000414382	Ensembl	+	27932792	27862978	noncoding	intergenic
ASHG19A3L0002802	156.559	66.9194	62.7047	43.9342	79.7037	90.3157	97.7333	7.36331	6.20043	6.14137	5.29924	6.26322	6.41823	6.4341	P	P	P	P	P	P	P	chr6	lincRNA-WISP3-1	TTGAAGTTGTTTTACAGATGGGGCAAGTGAAATGTTGGGAGTGGCTTGTCTCTGCTCTTG	4837	chr6:112269457-112274293+	lincRNA	+	112274293	112269457	noncoding	intergenic
ASHG19A3L0000494	187.308	257.393	212.463	467.599	187.471	402.527	255.617	7.61376	8.02889	7.81146	8.88204	7.54988	8.67156	7.90344	P	P	P	P	M	P	P	chr12	lincRNA-GXYLT1	AACATAAGAGAAGCCAGGAAAATGCAAGTCCTTCCTCCTGACCCTAGAAAATCTCTGCTG	352	AA432215	lincRNA	+	42159360	42158024	noncoding	intergenic
ASHG19A3A047519	38.2786	39.32	35.115	37.949	20.5183	29.609	27.1309	5.40722	5.48852	5.3388	5.07659	4.23451	4.75884	4.49841	P	P	P	P	P	P	P	chr1	RP11-475O6.1	GAAGCCTCTGTGAGGTCCAGCTGACTACTTCATTCTCATAAATACTTTCTTTGAAATCTC	1991	ENST00000457273	Ensembl	-	84326229	84267198	noncoding	intergenic
ASHG19A3L0001091	127.694	86.5071	103.898	210.999	65.7138	173.715	88.6801	7.08607	6.54852	6.83877	7.65374	5.97888	7.40279	6.29101	P	P	P	P	P	P	P	chr2	lincRNA-RND3-5	AAATGGAATAACACTAGCACTTTTAAAAACCCTACTTGTTGACTCACCTCCTTTTCCCCA	749	CD357617	lincRNA	-	151611356	151610615	noncoding	intergenic
ASHG19A3L0001360	22.9939	37.1113	17.7784	21.5453	15.9567	12.4815	14.2307	4.69271	5.4124	4.40071	4.21387	3.83909	3.40372	3.47367	P	P	P	A	P	A	P	chr3	lincRNA-LPP-3	TTAAAGAAATAATCACCCTTCACAAAAGCCAATTAAGCCCGCAGCGAACGGATGTGGGGT	945	BE967171	lincRNA	+	187591878	187591154	noncoding	intergenic
ASHG19A3L0002483	60.9614	48.834	53.1841	66.0067	84.8681	67.2405	97.4187	6.05636	5.7749	5.91326	5.9071	6.35695	5.98731	6.42851	P	P	P	P	P	P	P	chr1	lincRNA-ACTRT2	AAGAAGCTGAGCTACAAAGCCATTTTGTGGAGCTGAGCTGCCTTTCTTTCCATCTACACA	17613	chr1:2952104-2969716-	lincRNA	-	2969716	2952104	noncoding	intergenic
ASHG19A3L0003500	298.624	228.606	303.171	358.928	446.106	225.935	560.11	8.23653	7.87202	8.29765	8.47257	8.8629	7.79861	9.10328	P	P	P	P	P	P	P	chr1	lincRNA-TMCC2	GTCCAATGCCAGGGACCTGCGTGGTTGTTGTGGTTTGTGTTCCCTTCCTTTGGCTTTTTT	552	AA167479	lincRNA	-	205248933	205248383	noncoding	intergenic
ASHG19A3L0002521	242.411	154.411	124.225	296.592	119.559	233.152	233.163	7.95557	7.34275	7.08504	8.17692	6.87048	7.851	7.75827	P	P	P	P	P	P	P	chr12	lincRNA-TBX3-1	AAGACATCTAGGCATAAAACCCACACAGCCAACGCTTTGCTCCCTGGCCTCGCTCTGGGT	88	CB219568	lincRNA	-	115334548	115334460	noncoding	intergenic
ASHG19A3L0000844	915.514	873.439	804.815	754.572	810.045	828.332	847.04	9.73342	9.68505	9.6188	9.61407	9.7628	9.76636	9.72608	P	P	P	P	P	P	P	chr15	lincRNA-KIAA1199	GAGGGTGAGACTAAGCCACTTTTCTTATGATACTTTTGTTGAATAAAGGGCCACTTTCCA	2959	BC009210	lincRNA	-	81282169	81239669	noncoding	exon sense-overlapping	NM_015154	MESDC2	LDLR chaperone MESD	-	81268094	81282205
ASHG19A3L0000844	915.514	873.439	804.815	754.572	810.045	828.332	847.04	9.73342	9.68505	9.6188	9.61407	9.7628	9.76636	9.72608	P	P	P	P	P	P	P	chr15	lincRNA-KIAA1199	GAGGGTGAGACTAAGCCACTTTTCTTATGATACTTTTGTTGAATAAAGGGCCACTTTCCA	2959	BC009210	lincRNA	-	81282169	81239669	noncoding	natural antisense	NM_018689	KIAA1199	KIAA1199 precursor	+	81071711	81243999
ASHG19A3L0000153	754.261	673.471	837.165	1260.75	493.671	593.438	548.124	9.47153	9.32728	9.67769	10.392	9.02273	9.26462	9.06542	P	P	P	P	P	P	P	chr1	lincRNA-CDCP2	TCTCCTGAAACCATGTACCTCATTCCTCCCTGGATCCGAACACCCCAGCCTGGGTCCTGG	251	exon100+	lincRNA	+	54592957	54592707	noncoding
ASHG19A3L0002934	875.176	343.711	834.243	922.348	619.099	466.333	558.666	9.6739	8.42535	9.67252	9.92289	9.36231	8.8952	9.09814	P	P	P	P	P	P	P	chr2	lincRNA-OBFC2A-4	TTATCAAGAGGGAGAACTCAATCATGGTCCTGCAATGTGTTAGTGCTATCTCCTTCCCAG	10987	chr2:192293450-192304436+	lincRNA	+	192304436	192293450	noncoding	intergenic
ASHG19A3L0002792	129.115	104.344	117.851	263.339	228.637	165.102	260.881	7.10249	6.80883	7.00972	7.99986	7.84958	7.3265	7.9318	P	P	P	P	P	P	P	chr3	lincRNA-SPSB4-2	AATAAGTAAGGCTGTTAAGCCTCCAAGCACTTTTCCATGCTGCACTCCACCTAAAGTGTC	5593	chr3:140718187-140723779+	lincRNA	+	140723779	140718187	noncoding	intergenic
ASHG19A3L0000720	107.183	104.943	103.923	157.311	125.704	103.548	149.679	6.85045	6.81674	6.83931	7.21023	6.94857	6.62267	7.08817	P	P	P	P	P	P	P	chr14	lincRNA-CTAGE5	GGTAGGTTGCTAATTTTCCAGACTATTATGTCTTCTGGTTTTCCCTCAGTGGCATGCTTT	538	AI890481	lincRNA	-	39843049	39842524	noncoding	intergenic
ASHG19A3A049639	61.6022	60.1926	54.2316	21.9594	24.4312	25.4841	27.4813	6.07097	6.05581	5.94046	4.24456	4.48858	4.5326	4.51958	P	P	P	P	P	P	P	chr13	RP11-129M14.1	AAGGTCTTGCAGAAGATGATCAGAAAAGATACATTCATTGCCCATGAGCTGGCTGCAGAG	869	ENST00000397973	Ensembl	-	65885085	65883986	noncoding	intergenic
ASHG19A3A046436	482.229	494.851	414.223	422.882	503.376	326.932	615.786	8.88112	8.91095	8.72378	8.71963	9.05704	8.35691	9.23924	P	P	P	P	P	P	P	chr11	AB231722	ATCCCTCCTTCAGGTGTATGGCTCTGTGTACCACATAAATCACAGGAACCCCTTCAATAT	158	uc001nnk.1	UCSC_knowngene	+	58746843	58746331	noncoding	intergenic
ASHG19A3L0002551	36.9739	30.8098	28.988	44.7299	38.8567	38.0789	48.5623	5.35964	5.1614	5.08003	5.32816	5.18849	5.13573	5.39047	P	P	P	P	P	P	P	chr7	lincRNA-LUZP6-2	AAGTAACTTACTTGTTTCTTACTTGATTTCTGATTTCAATTCAAACATCCCCTGGCACTC	4161	chr7:136275537-136279697-	lincRNA	-	136279697	136275537	noncoding	intergenic
ASHG19A3A019001	115001	102771	93917.3	51651.6	56395.2	43441	55468.1	16.5183	16.4099	16.3425	15.8851	15.9522	15.59	15.8659	P	P	P	P	P	P	P	chr21	BX322559.2	ATACCCATCATAATCGGAGGCTTTGGCAATTGACTAGTCCCCTTAATAATTGGTACCCCC	192	ENST00000429327	Ensembl	-	46796297	46796105	noncoding	intergenic
ASHG19A3A014255	25.4788	8.98756	25.8082	9.23998	25.2151	25.5946	14.9632	4.8416	3.6555	4.91862	2.91837	4.53556	4.53837	3.55913	A	P	P	A	P	P	A	chr2	AC093901.1	AACACGTGCGGTGGCTTCAAAGGAGGAGGGAGAGTTGAGTTTAAACTAATGAAGTAAAGG	778	ENST00000414886	Ensembl	-	118943962	118889703	noncoding	intergenic
ASHG19A3L0003516	16.2877	15.8796	18.8783	35.8724	23.6776	24.633	31.604	4.18918	4.31597	4.48714	4.99258	4.44063	4.48208	4.74101	A	A	P	P	P	P	P	chr15	lincRNA-SQRDL-3	CTGATAGGGCAGCCTTTTAACATGTTCATTTTTCTGGTCATTTCTATGTACAATCATAAC	5109	chr15:47484859-47489967-	lincRNA	-	47489967	47484859	noncoding	intronic antisense	NM_001198999	SEMA6D	semaphorin-6D isoform 1 precursor	+	47476402	48066420
ASHG19A3L0002073	24.4341	16.8073	24.1328	49.1871	42.4545	29.5485	58.3639	4.77978	4.39196	4.81831	5.46999	5.31968	4.7559	5.66723	A	P	P	P	P	P	P	chr8	lincRNA-DUSP4-4	AACACATGGATTATGCTTCTCAGTGGTTTGGCAGCTAGGGTTGTAGAGATTGGAGAGTGT	21451	chr8:29836333-29857783-	lincRNA	-	29857783	29836333	noncoding	intergenic
ASHG19A3L0001038	1262.15	1250.78	1245.02	1259.3	1235.9	1197.67	1280.61	10.1707	10.1691	10.2095	10.3898	10.3891	10.3244	10.3577	P	P	P	P	P	P	P	chr2	lincRNA-SLC20A1-1	TTTTGAGGCCTTCGAGGAGTGTCTTCGACAGAACGAGGCAGCTGTGGGCAACTGTGCAGA	846	BI522654	lincRNA	+	113372157	113342057	noncoding	exon sense-overlapping	NM_032309	CHCHD5	coiled-coil-helix-coiled-coil-helix	+	113342035	113346617
ASHG19A3A029660	61.4169	47.3328	60.8456	78.1947	100.22	113.658	109.054	6.06709	5.73823	6.10166	6.16965	6.60298	6.75758	6.6046	P	P	P	P	P	P	P	chr6	HCG17	AGATACAGTTTGGTTGGTCCTTTACCTTCAAAAGTTCAAGTGCTGGCTGCCGAGACTTCT	732	ENST00000453558	Ensembl	-	30293911	30201815	noncoding	bidirectional	NM_021253	TRIM39	tripartite motif-containing protein 39 isoform	+	30294620	30311506
ASHG19A3A049926	552.077	507.177	566.25	554.464	667.215	721.516	779.186	9.05638	8.9435	9.13212	9.14635	9.4813	9.56653	9.59529	P	P	P	P	P	P	P	chr13	AK093279	TGTCTGCTCACATCTGGTCTGTTCCCCAGTATCCTCACTGTATTAAAGTTGTTTCTTTGT	2100	uc001unz.1	UCSC_knowngene	+	21906571	21872311	noncoding	intergenic
ASHG19A3A040405	2807.54	2807.39	2596.17	2865.29	3127	3201.41	3226.9	11.2982	11.2944	11.2523	11.5904	11.7564	11.7649	11.7075	P	P	P	P	P	P	P	chrX	RP1-197O17.2	TGTGAAACAGATGAGGGCTCGGCAGAACATGCGGGTGTCCAACACTGGCGAGTATGAGAG	430	ENST00000435914	Ensembl	-	130937769	130937339	noncoding	intergenic
ASHG19A3L0000954	19204.9	18413.2	17437.6	2617.01	2803.63	2936.68	3120.44	13.992	13.958	13.9234	11.4578	11.5946	11.6357	11.6608	P	P	P	P	P	P	P	chr18	lincRNA-GALNT1-2	GCACACTGATGTTTACAAGATTGAAAGAGTCTTTCTCCGAAAATCATGGTAAAGAATACT	2194	AK293062	lincRNA	+	33290012	33161002	noncoding	exon sense-overlapping	NM_020474	GALNT1	polypeptide N-acetylgalactosaminyltransferase 1	+	33234532	33291798
ASHG19A3L0003081	64.4833	50.1209	51.9899	65.4845	44.1367	45.6523	40.4396	6.13943	5.81004	5.88296	5.89648	5.37726	5.40852	5.11722	P	P	P	P	P	P	P	chr9	lincRNA-SYK	TATTGAGCAACATGTTTGGCTTCACAGTAATGTGCCCAGGTAAGTCCCTTACCTCTGTTT	548	BU659034	lincRNA	-	93679251	93678708	noncoding	intergenic
ASHG19A3L0001624	20.7704	12.9178	31.5373	57.4525	28.4724	9.90072	13.8324	4.54153	4.07186	5.1931	5.69783	4.72353	3.05746	3.42549	A	P	P	A	P	A	P	chr5	lincRNA-BOD1-3	ATTCAGATATGTCCCATGCTCAGTGATGGCATTCAGCAATGTCCAGGATAGAATGGGAAA	757	BU853548	lincRNA	+	172896884	172890502	noncoding	intergenic
ASHG19A3A000469	6.56055	5.08008	12.1304	21.8333	16.0916	18.4741	50.6767	2.987	2.3252	3.87512	4.2347	3.85304	4.03707	5.45427	A	A	A	P	P	P	P	chr4	RP11-234K19.2	ctgggctctctaaattcatttcagctctagggatttggaaaggattccgtgatggttaat	2080	ENST00000508174	Ensembl	+	80497614	80413569	noncoding	intergenic
ASHG19A3A026237	323.421	322.331	312.346	318.191	286.044	274.293	348.234	8.34886	8.33622	8.33668	8.28607	8.1936	8.10061	8.36461	P	P	P	P	P	P	P	chr4		GTTGGTAGTAACTGTATTTTGGCTCTGTTCAGTGGGCCTATAAATTCATTTGATTACATT	1415	AF143322	misc_RNA	+	160058861	160057456	noncoding	intergenic
ASHG19A3L0001844	28.5588	22.0205	20.3563	17.5344	27.6883	19.8675	39.2476	5.00027	4.72313	4.59324	3.89898	4.67992	4.14863	5.06666	A	P	P	P	P	P	P	chr7	lincRNA-NDUFA4-3	GCATGCTACCTTTGCCACGATTTATTGAACAAAATGCATTCTACCTTTCAATATGCTATT	18451	chr7:10142050-10160500+	lincRNA	+	10160500	10142050	noncoding	intergenic
ASHG19A3A019260	200833	198734	167021	150301	150676	116343	147486	17.3848	17.4417	17.2082	17.3562	17.3562	16.9541	17.2953	P	P	P	P	P	P	P	chr21	AF064859.2	GTTCCACTGGCTCCTGATTACGATGCTTTGGATGTTGCCAACAAAATTGGGATCATCTAA	473	ENST00000467573	Ensembl	+	40499966	40499493	noncoding	intergenic
ASHG19A3A043750	923.586	940.672	889.467	529.571	564.875	549.643	563.518	9.74896	9.7759	9.75467	9.07808	9.2195	9.14842	9.11372	P	P	P	P	P	P	P	chr10	LOC387647	AGCTGGCCACTTGCATTTCCGTTTCAGTTTATAGAATACATGTTTTGGAAATAGTATCTT	2095	NR_003930	RefSeq_NR	+	29711299	29698500	noncoding	intergenic
ASHG19A3L0001784	97.0083	84.4279	85.9366	68.0855	117.321	107.621	121.061	6.71745	6.51484	6.58335	5.95622	6.84375	6.67961	6.76712	P	P	P	P	P	P	P	chr6	lincRNA-DUSP22	TTCTAATGCTCTGAGGCTCCCATTCAGGAATGCAGTTGATTTTTCCCGTTTCAGAAGCGT	507	DB301608	lincRNA	-	383627	383120	noncoding	intergenic
ASHG19A3L0002778	15.377	9.80554	15.0723	65.4514	15.7281	47.6867	23.7158	4.11135	3.75013	4.17988	5.89569	3.81835	5.47303	4.29716	A	A	A	P	P	P	P	chr6	lincRNA-MARCKS-1	AATATTATATGTACAGGTACAAGTCTTAGCTTTCCCACCAGACTGAAACTCAATGGAAAG	19332	chr6:113907488-113926819+	lincRNA	+	113926819	113907488	noncoding	intergenic
ASHG19A3L0003517	4713.83	4718.55	4245.11	1444.04	1285.02	1314.88	1337.95	12.0397	12.051	11.9599	10.5974	10.4507	10.4651	10.4262	P	P	P	P	P	P	P	chr15	lincRNA-SEMA6D-3	CGGCATAAAAAGTAACCCTCAAGTGAAGTGTCTCTATACTGTTTTATAGAGTACTTTAAC	5955	BC150253	lincRNA	+	48066417	47476402	noncoding	exon sense-overlapping	NM_001198999	SEMA6D	semaphorin-6D isoform 1 precursor	+	47476402	48066420
ASHG19A3L0003517	4713.83	4718.55	4245.11	1444.04	1285.02	1314.88	1337.95	12.0397	12.051	11.9599	10.5974	10.4507	10.4651	10.4262	P	P	P	P	P	P	P	chr15	lincRNA-SEMA6D-3	CGGCATAAAAAGTAACCCTCAAGTGAAGTGTCTCTATACTGTTTTATAGAGTACTTTAAC	5955	BC150253	lincRNA	+	48066417	47476402	noncoding	exon sense-overlapping	NM_024966	SEMA6D	semaphorin-6D isoform 6 precursor	+	48010685	48057677
ASHG19A3L0003517	4713.83	4718.55	4245.11	1444.04	1285.02	1314.88	1337.95	12.0397	12.051	11.9599	10.5974	10.4507	10.4651	10.4262	P	P	P	P	P	P	P	chr15	lincRNA-SEMA6D-3	CGGCATAAAAAGTAACCCTCAAGTGAAGTGTCTCTATACTGTTTTATAGAGTACTTTAAC	5955	BC150253	lincRNA	+	48066417	47476402	noncoding	exon sense-overlapping	NM_020858	SEMA6D	semaphorin-6D isoform 1 precursor	+	48010685	48066420
ASHG19A3L0003517	4713.83	4718.55	4245.11	1444.04	1285.02	1314.88	1337.95	12.0397	12.051	11.9599	10.5974	10.4507	10.4651	10.4262	P	P	P	P	P	P	P	chr15	lincRNA-SEMA6D-3	CGGCATAAAAAGTAACCCTCAAGTGAAGTGTCTCTATACTGTTTTATAGAGTACTTTAAC	5955	BC150253	lincRNA	+	48066417	47476402	noncoding	exon sense-overlapping	NM_153618	SEMA6D	semaphorin-6D isoform 4 precursor	+	48010685	48066420
ASHG19A3L0003517	4713.83	4718.55	4245.11	1444.04	1285.02	1314.88	1337.95	12.0397	12.051	11.9599	10.5974	10.4507	10.4651	10.4262	P	P	P	P	P	P	P	chr15	lincRNA-SEMA6D-3	CGGCATAAAAAGTAACCCTCAAGTGAAGTGTCTCTATACTGTTTTATAGAGTACTTTAAC	5955	BC150253	lincRNA	+	48066417	47476402	noncoding	exon sense-overlapping	NM_153617	SEMA6D	semaphorin-6D isoform 3 precursor	+	48010685	48066420
ASHG19A3L0003517	4713.83	4718.55	4245.11	1444.04	1285.02	1314.88	1337.95	12.0397	12.051	11.9599	10.5974	10.4507	10.4651	10.4262	P	P	P	P	P	P	P	chr15	lincRNA-SEMA6D-3	CGGCATAAAAAGTAACCCTCAAGTGAAGTGTCTCTATACTGTTTTATAGAGTACTTTAAC	5955	BC150253	lincRNA	+	48066417	47476402	noncoding	exon sense-overlapping	NM_153616	SEMA6D	semaphorin-6D isoform 2 precursor	+	48010685	48066420
ASHG19A3L0003517	4713.83	4718.55	4245.11	1444.04	1285.02	1314.88	1337.95	12.0397	12.051	11.9599	10.5974	10.4507	10.4651	10.4262	P	P	P	P	P	P	P	chr15	lincRNA-SEMA6D-3	CGGCATAAAAAGTAACCCTCAAGTGAAGTGTCTCTATACTGTTTTATAGAGTACTTTAAC	5955	BC150253	lincRNA	+	48066417	47476402	noncoding	exon sense-overlapping	NM_153619	SEMA6D	semaphorin-6D isoform 5 precursor	+	48010685	48066420
ASHG19A3L0000012	90.6409	91.8084	95.8392	3798.18	3429.11	3615.53	3881.99	6.61784	6.63671	6.72953	11.999	11.8852	11.9343	11.9693	P	P	P	P	P	P	P	chr1	lincRNA-KCNA2-1	CATGGGTGTACATAGACTTCATAGAGCTCCACAGTCTTTTGTAAATATTGACACAAGTAA	2022	BC043564	lincRNA	-	111174096	111136202	noncoding	exon sense-overlapping	NM_004974	KCNA2	potassium voltage-gated channel subfamily A	-	111145775	111148975
ASHG19A3L0000012	90.6409	91.8084	95.8392	3798.18	3429.11	3615.53	3881.99	6.61784	6.63671	6.72953	11.999	11.8852	11.9343	11.9693	P	P	P	P	P	P	P	chr1	lincRNA-KCNA2-1	CATGGGTGTACATAGACTTCATAGAGCTCCACAGTCTTTTGTAAATATTGACACAAGTAA	2022	BC043564	lincRNA	-	111174096	111136202	noncoding	exon sense-overlapping	NM_001204269	KCNA2	potassium voltage-gated channel subfamily A	-	111136201	111174096
ASHG19A3A048670	48.7047	46.0731	43.5974	287.55	272.312	292.269	309.321	5.74809	5.70035	5.64167	8.13165	8.12433	8.19796	8.19036	P	P	P	P	P	P	P	chr12	RP11-834C11.8	CCAACAGGGAAACTGAATGCCTAAGACATTCATTCATTCATTTACCCATTCAATAAATAC	403	ENST00000504210	Ensembl	+	54562379	54556922	noncoding	intergenic
ASHG19A3A009018	87.0533	68.2949	82.9965	63.3431	80.1541	92.4722	89.7168	6.56413	6.22871	6.53433	5.84872	6.27262	6.4537	6.30928	P	P	P	P	P	P	P	chr17	ALOX12P2	TAATGTCATCATTTTTAAGCAGCAATGCGTGGCAGCCCCTTTGGTCATGCTGAAGCTTCA	2768	NR_002710	RefSeq_NR	+	6803667	6756894	noncoding	intergenic
ASHG19A3L0001722	1329.91	1392.39	1253.22	3329.82	3325.5	3477.53	3661.16	10.2487	10.3104	10.2184	11.8084	11.8443	11.8753	11.894	P	P	P	P	P	P	P	chr6	lincRNA-SAMD3	GGTTGTGGTAGAGGTAGGTATGAGAAAGTCATCTTGTATTTATAGATGCTAATGAATTTC	2376	AX746929	lincRNA	-	130686570	130465462	noncoding	exon sense-overlapping	NM_001017373	SAMD3	sterile alpha motif domain-containing protein 3	-	130465460	130544099
ASHG19A3L0001722	1329.91	1392.39	1253.22	3329.82	3325.5	3477.53	3661.16	10.2487	10.3104	10.2184	11.8084	11.8443	11.8753	11.894	P	P	P	P	P	P	P	chr6	lincRNA-SAMD3	GGTTGTGGTAGAGGTAGGTATGAGAAAGTCATCTTGTATTTATAGATGCTAATGAATTTC	2376	AX746929	lincRNA	-	130686570	130465462	noncoding	exon sense-overlapping	NM_152552	SAMD3	sterile alpha motif domain-containing protein 3	-	130504132	130536494
ASHG19A3L0001298	210.236	265.186	263.008	454.269	148.935	382.511	228.219	7.76497	8.06859	8.09669	8.83021	7.20263	8.5915	7.72319	P	P	M	P	P	P	P	chr3	lincRNA-CCDC54-2	TAGAAACACAGCTCATTAAATATTATGTCCAGGCCCACTTCCCTCTTTCTGAAGAACTAA	544	DB341809	lincRNA	+	105800229	105799683	noncoding	intergenic
ASHG19A3L0002346	12.5572	11.6245	21.0465	56.1057	14.5074	39.6949	26.5255	3.83021	3.94877	4.63686	5.66113	3.68744	5.19813	4.46698	A	A	M	P	A	P	P	chr3	lincRNA-LEKR1-1	ATAAGAGAGAATTTGGGAGACCACTGGAGTCTTCTTTGGACCCCTGAAATTGTGTCCTCT	586	BQ638469	lincRNA	-	156851724	156851137	noncoding	intergenic
ASHG19A3A038293	365.925	338.301	306.665	364.729	203.631	264.066	197.71	8.51835	8.40245	8.31371	8.49896	7.67315	8.03826	7.50704	P	P	P	P	P	P	P	chr9	RP11-165F24.2	GCCTCCTGACATCATAGATGACATCAAATCAACAGTGGTGCAAGTAAATATCCAGCTAGC	494	ENST00000455592	Ensembl	+	478349	477855	noncoding	intergenic
ASHG19A3L0001828	370.21	323.813	373.671	433.967	627.703	356.65	740.768	8.53283	8.34129	8.59036	8.75797	9.3854	8.48161	9.52234	P	P	P	P	P	P	P	chr6	lincRNA-UBE2CBP-2	TCCAATTTTTATTCCATGTAGTTTTCGGGCAAACCCCTACCTCTGCCTTCTCTGGTGTCT	571	DA428052	lincRNA	+	83153152	83152581	noncoding	intergenic
ASHG19A3A049302	55.4879	56.0538	57.563	73.3361	68.6321	59.6735	101.202	5.9311	5.96073	6.02354	6.06897	6.04454	5.80419	6.48546	P	P	P	P	P	P	P	chr13	RP11-273F15.1	GGACATTGAGTTCTTTTAGTTTCCTCTCTGTTGATAATTAACTGTTATTGTTGTCATCCC	220	ENST00000441336	Ensembl	-	22687477	22687257	noncoding	intergenic
ASHG19A3A031149	73.8296	68.4135	84.2375	57.4575	71.063	85.7951	75.7608	6.3398	6.23037	6.55653	5.69833	6.09327	6.33973	6.05929	P	M	P	P	P	P	P	chr6	BC035101	TTATGAACAAATGCAGGGCTGAGAAACAGCATGGTGGCCTTGACTAAGTTTATGGCGACA	2763	uc003njk.2	UCSC_knowngene	+	27676935	27661864	noncoding	intergenic
ASHG19A3L0002044	10.7258	8.66816	14.579	36.8775	35.6411	38.5531	48.3338	3.61676	3.61595	4.12575	5.03116	5.05863	5.15508	5.38271	A	A	A	P	P	P	P	chr8	lincRNA-NAT1-1	GTATAACTCTAGTGAATCCCCAGTAAGTGCAAATTAAAATGGTGACCTGTATCTTTAAAG	580	BG195666	lincRNA	+	17984911	17984343	noncoding	intergenic
ASHG19A3A014639	1427.85	1338.27	1409.02	516.319	239.025	527.131	317.397	10.3431	10.2579	10.3843	9.03844	7.9191	9.08425	8.22842	P	P	M	P	P	P	P	chr2	RPL5P7	CTCACAATACATAAAGAACTGCATAACTCCAGACTTGGTGGAGGAGCTCATGCTGCTGTA	813	ENST00000444235	Ensembl	-	174737193	174736380	noncoding	intergenic
ASHG19A3A050013	74.8423	64.6804	78.5866	152.078	51.2396	142.063	51.4456	6.35695	6.15325	6.4537	7.15633	5.59932	7.09583	5.47632	P	P	P	P	P	P	P	chr13	RP11-490N5.1	ATCTCGTCACGCTCCTAGTTTCCAAGCCCACACACCTGAGGGTCAATGTCCCTTATTGCA	374	ENST00000435044	Ensembl	+	30728723	30728202	noncoding	intergenic
ASHG19A3A016047	50.6935	18.0377	50.6081	82.5569	33.2962	23.6562	32.9084	5.8026	4.47847	5.84621	6.25308	4.95159	4.42063	4.8012	A	P	P	P	P	P	P	chr2		CAGTCTCCATTCTCTCTTCAGGAAAGAGGCCTACTCGCAGATGAACGCACCAAGGCTCAG	339	BC105019	NRED	+	100865566	100825111	noncoding	intergenic
ASHG19A3L0001707	53.7168	43.811	52.2721	73.3479	47.8875	40.7288	92.5112	5.88458	5.63083	5.89085	6.06931	5.50247	5.23487	6.35272	P	P	P	P	P	P	P	chr6	lincRNA-RFPL4B-2	TTAAGGTCAACATTCAGAGTCTACTGTGCTCTCTTACTTGGGCTCACCTGAGAGCATCTT	1116	BM912149	lincRNA	-	113694821	113694302	noncoding	intergenic
ASHG19A3L0001174	148.209	139.566	177.26	180.953	160.22	195.468	198.858	7.28736	7.20652	7.57187	7.42846	7.3149	7.58055	7.516	P	P	P	P	P	P	P	chr2	lincRNA-TWIST2-1	TCTACCAGGTCCTGCAGAGCGACGAGATGGACAATAAGATGACCAGCTGCAGCTACGTGG	523	DQ896053	lincRNA	+	239757337	239664123	noncoding	exon sense-overlapping	NM_057179	TWIST2	twist-related protein 2	+	239756672	239795893
ASHG19A3A044131	264.174	246.962	252.729	400.689	468.082	255.209	442.601	8.06736	7.97475	8.03856	8.63804	8.93928	7.98569	8.73385	P	P	P	P	P	P	P	chr10	AK023445	ACTTCTTTATGAAGGACTCCAGCCTGGTGGAGATGAATGAGTCCTGAAGATGGAATCGAA	1860	uc001jxd.1	UCSC_knowngene	+	77121436	77056147	noncoding	intergenic
ASHG19A3A037065	55.1973	66.7338	70.8493	67.6873	52.3081	70.7388	71.344	5.92276	6.1966	6.30762	5.94585	5.63229	6.06668	5.96572	P	P	P	P	P	P	P	chr9		CTTACAAGCACTAGAGAAGGTAACATCACCAGTAAAGACTTAAAGTATTTTCCTTAGTCT	1618	BC034707	misc_RNA	-	2760832	2759256	noncoding	intergenic
ASHG19A3L0001308	110.685	87.144	117.914	112.628	104.052	81.5973	108.228	6.89208	6.56014	7.0106	6.70574	6.66123	6.2666	6.59454	P	P	P	P	P	P	P	chr3	lincRNA-TPRA1-4	ATGCAACAATTACTGGGAGGACAAAATGAGGGAAGGTACCAAAGCAGCCCCCTTAACCCA	101	exon2751+	lincRNA	+	126878138	126878038	noncoding
ASHG19A3L0003233	68.9403	59.8597	57.746	77.7596	83.8271	58.0358	86.2938	6.23855	6.04716	6.02858	6.15991	6.33944	5.76346	6.25157	P	P	P	P	P	P	P	chr22	lincRNA-TNFRSF13C	CCCCCGGAACGAGAAGGAAACACCCCCGGACAAACCCTTTTCTTCAAATTTTATAAAAAA	1342	CU692690	lincRNA	+	42423168	42120333	noncoding	intronic antisense	NM_001002876	CENPM	centromere protein M isoform b	-	42334740	42343148
ASHG19A3L0003233	68.9403	59.8597	57.746	77.7596	83.8271	58.0358	86.2938	6.23855	6.04716	6.02858	6.15991	6.33944	5.76346	6.25157	P	P	P	P	P	P	P	chr22	lincRNA-TNFRSF13C	CCCCCGGAACGAGAAGGAAACACCCCCGGACAAACCCTTTTCTTCAAATTTTATAAAAAA	1342	CU692690	lincRNA	+	42423168	42120333	noncoding	intronic antisense	NM_001110215	CENPM	centromere protein M isoform c	-	42334740	42336223
ASHG19A3L0003233	68.9403	59.8597	57.746	77.7596	83.8271	58.0358	86.2938	6.23855	6.04716	6.02858	6.15991	6.33944	5.76346	6.25157	P	P	P	P	P	P	P	chr22	lincRNA-TNFRSF13C	CCCCCGGAACGAGAAGGAAACACCCCCGGACAAACCCTTTTCTTCAAATTTTATAAAAAA	1342	CU692690	lincRNA	+	42423168	42120333	noncoding	intron sense-overlapping	NM_145733	3-Sep	neuronal-specific septin-3 isoform A	+	42372930	42394225
ASHG19A3L0003233	68.9403	59.8597	57.746	77.7596	83.8271	58.0358	86.2938	6.23855	6.04716	6.02858	6.15991	6.33944	5.76346	6.25157	P	P	P	P	P	P	P	chr22	lincRNA-TNFRSF13C	CCCCCGGAACGAGAAGGAAACACCCCCGGACAAACCCTTTTCTTCAAATTTTATAAAAAA	1342	CU692690	lincRNA	+	42423168	42120333	noncoding	intron sense-overlapping	NM_019106	3-Sep	neuronal-specific septin-3 isoform B	+	42372930	42394225
ASHG19A3L0003233	68.9403	59.8597	57.746	77.7596	83.8271	58.0358	86.2938	6.23855	6.04716	6.02858	6.15991	6.33944	5.76346	6.25157	P	P	P	P	P	P	P	chr22	lincRNA-TNFRSF13C	CCCCCGGAACGAGAAGGAAACACCCCCGGACAAACCCTTTTCTTCAAATTTTATAAAAAA	1342	CU692690	lincRNA	+	42423168	42120333	noncoding	intron sense-overlapping	NM_024821	CCDC134	coiled-coil domain-containing protein 134	+	42196677	42222303
ASHG19A3L0003233	68.9403	59.8597	57.746	77.7596	83.8271	58.0358	86.2938	6.23855	6.04716	6.02858	6.15991	6.33944	5.76346	6.25157	P	P	P	P	P	P	P	chr22	lincRNA-TNFRSF13C	CCCCCGGAACGAGAAGGAAACACCCCCGGACAAACCCTTTTCTTCAAATTTTATAAAAAA	1342	CU692690	lincRNA	+	42423168	42120333	noncoding	intronic antisense	NM_052945	TNFRSF13C	tumor necrosis factor receptor superfamily	-	42321035	42322821
ASHG19A3L0003233	68.9403	59.8597	57.746	77.7596	83.8271	58.0358	86.2938	6.23855	6.04716	6.02858	6.15991	6.33944	5.76346	6.25157	P	P	P	P	P	P	P	chr22	lincRNA-TNFRSF13C	CCCCCGGAACGAGAAGGAAACACCCCCGGACAAACCCTTTTCTTCAAATTTTATAAAAAA	1342	CU692690	lincRNA	+	42423168	42120333	noncoding	intron sense-overlapping	NM_152513	MEI1	meiosis inhibitor protein 1	+	42095517	42195459
ASHG19A3L0003233	68.9403	59.8597	57.746	77.7596	83.8271	58.0358	86.2938	6.23855	6.04716	6.02858	6.15991	6.33944	5.76346	6.25157	P	P	P	P	P	P	P	chr22	lincRNA-TNFRSF13C	CCCCCGGAACGAGAAGGAAACACCCCCGGACAAACCCTTTTCTTCAAATTTTATAAAAAA	1342	CU692690	lincRNA	+	42423168	42120333	noncoding	intron sense-overlapping	NM_004599	SREBF2	sterol regulatory element-binding protein 2	+	42229105	42302375
ASHG19A3L0003233	68.9403	59.8597	57.746	77.7596	83.8271	58.0358	86.2938	6.23855	6.04716	6.02858	6.15991	6.33944	5.76346	6.25157	P	P	P	P	P	P	P	chr22	lincRNA-TNFRSF13C	CCCCCGGAACGAGAAGGAAACACCCCCGGACAAACCCTTTTCTTCAAATTTTATAAAAAA	1342	CU692690	lincRNA	+	42423168	42120333	noncoding	intronic antisense	NM_024053	CENPM	centromere protein M isoform a	-	42334740	42343148
ASHG19A3L0003233	68.9403	59.8597	57.746	77.7596	83.8271	58.0358	86.2938	6.23855	6.04716	6.02858	6.15991	6.33944	5.76346	6.25157	P	P	P	P	P	P	P	chr22	lincRNA-TNFRSF13C	CCCCCGGAACGAGAAGGAAACACCCCCGGACAAACCCTTTTCTTCAAATTTTATAAAAAA	1342	CU692690	lincRNA	+	42423168	42120333	noncoding	exon sense-overlapping	NM_152613	WBP2NL	postacrosomal sheath WW domain-binding protein	+	42394728	42424477
ASHG19A3A016880	22.7178	18.8852	26.36	21.5607	21.1695	23.1803	29.2242	4.67412	4.53509	4.94894	4.21543	4.28039	4.38774	4.61972	A	P	P	P	P	P	P	chr2	AC008269.2	GAAAAGCCAGCAATCACATGATATGCCAGAACGGACAAGATCGTTTGAGAAGAGGAAAAA	646	ENST00000438070	Ensembl	+	207733013	207731518	noncoding	intergenic
ASHG19A3L0000396	230.123	204.893	235.452	301.83	315.355	337.82	350.661	7.88794	7.72715	7.94125	8.20304	8.33537	8.40028	8.376	P	P	P	P	P	P	P	chr11	lincRNA-TPCN2	AAGGCTTAAAGCCGCACTCCACACCTAGGCCTGTGACACCTCCCACAAGCTTCTTCACCT	579	DB036467	lincRNA	-	69002403	68999680	noncoding	intergenic
ASHG19A3L0001622	335.59	234.896	355.327	222.563	487.117	546.01	553.61	8.40213	7.90891	8.51696	7.73668	9.00226	9.13886	9.0809	P	P	P	P	P	P	P	chr5	lincRNA-NKX2-5-1	ATCAGGGACACCAAATTCTTAACCCTGTGACTGCCCCTCTAGAGAACATCCTTTCATTTG	14701	chr5:172618919-172633619+	lincRNA	+	172633619	172618919	noncoding	intergenic
ASHG19A3A014315	247.093	284.836	296.822	182.065	291.706	308.549	315.338	7.9801	8.16382	8.26861	7.43781	8.22056	8.2762	8.22056	P	P	P	P	P	P	P	chr2		TTCAGAAAAAATGGAATTCTAGCCCAGGCATACTCCCCACAACACATTCAGGGCTCCAAT	3579	AK128224	misc_RNA	-	129136621	129133041	noncoding	intergenic
ASHG19A3L0000422	16.7723	20.7934	20.3874	63.3354	57.8174	40.4885	73.7194	4.23117	4.65508	4.59556	5.84813	5.78916	5.22578	6.01698	A	A	P	P	P	P	P	chr11	lincRNA-AMOTL1-2	CAAAGGAAGATCAGCCAAGCCTCAACATAATCTCATAAAAATTCATCAAATATCCCATTG	690	CD174643	lincRNA	+	94384794	94380374	noncoding	intergenic
ASHG19A3L0000067	49.0096	59.4725	51.5791	85.8339	40.3279	79.1965	52.1071	5.75829	6.03864	5.87126	6.31003	5.24179	6.22307	5.49777	P	P	P	P	P	P	P	chr1	lincRNA-PLXNA2-1	AATAAGGAGAGACAACTCAGCATCCACCCTGCAGTGAATAATAGAACAAAAAGCTGCCGG	563	DA430048	lincRNA	+	208139352	208132362	noncoding	intergenic
ASHG19A3L0000343	413.112	313.086	464.591	689.666	228.971	543.022	211.335	8.68044	8.29365	8.86965	9.47241	7.85353	9.12995	7.60838	P	P	P	P	P	P	P	chr11	lincRNA-TMEM45B-1	GCATTTTTAAAACTTCCATCCAGTCCTGCATCGTCTTCCTCCTCAAAACTTTTTCAGAGG	589	CV346902	lincRNA	+	129596709	129596130	noncoding	intergenic
ASHG19A3L0000633	188.197	197.958	197.951	83.492	85.2312	72.9474	75.6608	7.62063	7.67954	7.71719	6.26943	6.36369	6.10904	6.0578	P	P	P	P	P	P	P	chr13	lincRNA-NUDT15-1	CAGGAGTCGGAGTCGGAGTCGTGGTGACCAGCTGCAAGCATCCGCGTTGCGCCTCGTGCC	615	BQ045000	lincRNA	+	48611972	48578770	noncoding	exon sense-overlapping	NM_018283	NUDT15	"probable 7,8-dihydro-8-oxoguanine triphosphatase"	+	48611702	48621282
ASHG19A3L0003054	401.685	377.859	403.566	170.506	133.326	114.785	113.941	8.64068	8.55584	8.69182	7.33481	7.03509	6.77449	6.66961	P	P	P	P	P	P	P	chr8	lincRNA-POTEA-2	AGTGACTACTGCTGTAATTGCTTAGGCTGCTGTTAGTTTCTCTTAATCAAAATTACTATG	1001	chr8:48104990-48105990-	lincRNA	-	48105990	48104990	noncoding	intergenic
ASHG19A3L0002380	135.108	70.1787	109.525	221.301	80.6676	54.9769	96.1195	7.16366	6.26599	6.91457	7.72743	6.28163	5.6854	6.40973	P	P	P	P	P	P	P	chr1	lincRNA-VAV3-1	CAAAGTTCTGTTTGGAACCATGAGCCCAATTAGTTTCCTTCTTCTCATCCCTGTGATACC	4832	chr1:108595980-108600811-	lincRNA	-	108600811	108595980	noncoding	intergenic
ASHG19A3A050759	41.423	25.8471	41.4498	185.421	169.07	182.195	178.473	5.51507	4.92922	5.57158	7.46225	7.39554	7.47474	7.34995	A	P	P	P	P	P	P	chr14	BC084561	AATATGACCTGAAGCAGATGGATGCACTCACATAAGAAACATCACCTGTGGCCTTCATCG	2301	uc001wxl.2	UCSC_knowngene	-	50507947	50504312	noncoding	intergenic
ASHG19A3L0001451	8.59679	8.77228	7.2797	21.31	22.1548	27.746	51.3815	3.31094	3.62942	3.20425	4.19747	4.34182	4.661	5.47437	A	A	A	P	P	P	P	chr4	lincRNA-ARSJ-1	GAAATGTTTTGGGCCAAAATACCATCACCACTGTTGTTTGAATAACAATTTAAATGGCCT	10776	chr4:114709776-114720551+	lincRNA	+	114720551	114709776	noncoding	intergenic
ASHG19A3L0001024	31.3883	30.8401	35.6709	59.1777	48.1184	58.9503	73.1731	5.12826	5.16317	5.36157	5.74531	5.50912	5.78728	6.00427	P	P	P	P	P	P	P	chr2	lincRNA-TBC1D8	CCTATGGATATTGAGTTGGCTTTTGCAGAAAGCAAGCTACATATTTATTATTCAGCTTGT	475	AW886228	lincRNA	-	101845531	101845072	noncoding	intergenic
ASHG19A3L0002922	42.2043	41.8017	47.6625	52.3651	81.6007	51.3811	99.8904	5.54359	5.56918	5.76444	5.56609	6.30158	5.58278	6.46626	P	P	P	P	P	P	P	chr2	lincRNA-OBFC2A-1	GGAATATGGTTATTCTTTGAGGACCCTCTGTTTTATGGCCCAGTACTTGTGCTAGTCACA	12121	chr2:192408439-192420559+	lincRNA	+	192420559	192408439	noncoding	intergenic
ASHG19A3A036713	11.4811	16.2659	25.3042	29.6244	18.2158	27.9229	19.6477	3.70555	4.34811	4.8877	4.70449	4.04796	4.66926	3.99547	A	A	P	P	P	P	P	chr8		CTCTAAAAAGTTTCAGTGTAGACCAAATTTTACACACATAATTGACCCCAATGCCCCCTT	2844	BC063314	misc_RNA	+	81181009	81178203	noncoding	intergenic
ASHG19A3A051551	137.729	123.162	116.162	172.557	107.575	78.7901	105.494	7.19076	7.03667	6.98991	7.35055	6.71071	6.21611	6.55366	P	P	P	P	P	P	P	chr14		TGCTTCCTTGTCCCTTTCAGCAAAGGATGTCATGGTTTTACAATGTCTCCAGTGAAAAAG	349	AJ431608	misc_RNA	+	69078314	69077966	noncoding	intergenic
ASHG19A3A054714	46.7079	46.1646	33.8047	49.9634	77.3635	53.3011	72.5275	5.68844	5.70331	5.2852	5.49654	6.21998	5.64136	5.98998	P	P	P	P	P	P	P	chr1	RP11-276E17.2	CCACTACTTGTTTTGCTCAACAAGAACACACATCGTGTTGACTCCATCTTTTATATGATG	701	ENST00000426519	Ensembl	-	166459276	166445008	noncoding	intergenic
ASHG19A3A015656	124.46	86.9634	83.0703	127.298	108.113	119.57	129.198	7.054	6.55768	6.53544	6.89185	6.71823	6.84023	6.85795	P	P	P	P	P	P	P	chr2	AC008280.5	GAAGTCATGCAATTTTTATTTGTTGTGCACTTATTTTGTACCAATCACTCTTCCAACCAC	1115	ENST00000422521	Ensembl	+	54293184	54198244	noncoding	bidirectional	NM_014614	PSME4	proteasome activator complex subunit 4	-	54091203	54197977
ASHG19A3A031718	176.205	160.204	172.813	159.623	170.447	153.259	190.914	7.52538	7.39223	7.53118	7.23115	7.40684	7.2148	7.45245	P	P	P	P	P	P	P	chr6	AL832252	AATCTGTTGGATGATTACAACATTGCTGGATTGATAGCAGCCTCACCTGCCAGGCTCAAA	3358	uc003pgq.2	UCSC_knowngene	+	74001059	73977773	noncoding	intergenic
ASHG19A3L0002925	44.8185	36.3444	61.2049	27.9548	59.1994	70.79	80.5792	5.62875	5.3842	6.11055	4.61767	5.82392	6.06766	6.15445	P	M	P	P	P	P	P	chr12	lincRNA-KRR1	TATATAGGAATCAAAGCGAAGCGTTGGAGTAGATGCCGAGATCACTCTCCTCAAACTCTG	749	BG260387	lincRNA	-	76377795	75957052	noncoding	intergenic
ASHG19A3A000442	25.1004	20.4452	29.1738	33.1646	28.6061	36.7478	37.652	4.81939	4.63645	5.08865	4.87066	4.73128	5.08376	5.00555	A	P	P	P	P	P	P	chr4	RP11-564P3.1	tttgttaattgtttcctttgctgtgcaaaaTGTCTCTTTTTTTTATTTTTTTATtttttt	437	ENST00000504270	Ensembl	-	45909868	45724759	noncoding	intergenic
ASHG19A3L0002841	22.0411	17.6581	31.5886	23.0377	31.058	40.8998	35.1386	4.62647	4.45157	5.19574	4.31873	4.85405	5.24123	4.90306	A	P	P	P	P	P	P	chrX	lincRNA-GPC4	AATATAATAAAAAGGTGGATTTGAGTTTTCTGTGGCCAGCCAAGAATAACAGAACTGAAG	5902	chrX:132646958-132652859-	lincRNA	-	132652859	132646958	noncoding	intergenic
ASHG19A3A035094	36.8185	34.1357	44.8941	26.9525	47.5107	39.5152	44.2484	5.35485	5.29867	5.68409	4.56485	5.48896	5.19076	5.25383	P	P	P	P	P	P	P	chr7	AC009365.4	TGTCTTGTCTCCCAGACTCAGATACAAGCCCATCAAGGCAGTGAGGTTGACATCTTTTTT	751	ENST00000436379	Ensembl	+	132445392	132443729	noncoding	intergenic
ASHG19A3L0001179	54.5608	58.8415	60.3518	99.7747	42.1882	86.3686	50.7235	5.90817	6.02575	6.08883	6.52974	5.31136	6.35128	5.45547	P	P	P	P	P	P	P	chr2	lincRNA-MYT1L-1	TGTAACACAGCTCCGCTTCCTCTCTGGAATGTTCCAATGTTCCATAAATTAGTCAACGCC	13401	chr2:3172193-3185593-	lincRNA	-	3185593	3172193	noncoding	intergenic
ASHG19A3A016792	82.1602	47.6502	110.182	91.4944	41.2758	46.623	58.9208	6.4872	5.7473	6.92375	6.40683	5.27987	5.44026	5.68142	P	P	P	P	P	P	P	chr2	AOX2	ACAAAATTCCAACCATCACTGATGTCCCAGAGGAGTTCAATGTCTCCTTGCTGCCATCAT	978	uc002uwa.2	UCSC_knowngene	+	201658962	201635394	noncoding	intergenic
ASHG19A3A029224	1189.9	1111.67	1158.16	445.313	154.738	416.884	419.435	10.0894	9.99582	10.1153	8.80045	7.26036	8.72329	8.64835	P	P	P	P	P	P	P	chr1	RP11-423O2.6	CAAAGAAAGAAAGATTGGGAAAACGTATCCTCAGCAATTTCCCAAGAAACTGAAGGAAGA	1746	ENST00000457776	Ensembl	+	142827235	142803531	noncoding	intergenic
ASHG19A3A020948	62.9602	57.2882	53.8351	68.1488	83.7305	56.0807	93.653	6.10454	5.99029	5.9292	5.95857	6.33816	5.71477	6.3715	P	P	P	P	P	P	P	chr3	RP11-141M3.3	ACAAAAAGCTCTCCATTCACGAAATAGCGGTAGAATTGCATCCTGGTTCCAGACCATGGA	2134	ENST00000447834	Ensembl	-	42978277	42975743	noncoding	natural antisense	NM_001205272	KRBOX1	KRAB domain-containing protein 1	+	42977833	42984283
ASHG19A3L0001845	36.3632	28.8524	36.0105	41.0381	47.3495	39.6761	49.4764	5.33802	5.07659	5.37794	5.19401	5.48476	5.19751	5.4166	P	P	P	P	P	P	P	chr7	lincRNA-ATXN7L1	ATTCCGAGTCACAACAGTTTGAGCCATGAAACAGAAAAACCCATGACTCCTTCTGCTGCT	589	BU622891	lincRNA	-	105564659	105564086	noncoding	intergenic
ASHG19A3L0002709	31.579	19.6588	29.7044	43.8631	58.0664	38.7726	63.0991	5.13735	4.58609	5.1144	5.29606	5.79488	5.16445	5.78525	A	P	P	P	P	P	P	chr16	lincRNA-WDR59-1	AAGATTGCCCTCTGCAAATGGTGTGATTCCACTGAGGAACACAACAGATCCTTTCTCTCT	1187	AL563761	lincRNA	+	74906317	74905284	noncoding	intergenic
ASHG19A3A034624	528.85	570.548	546.237	552.628	597.46	657.526	687.605	9.0017	9.09618	9.08425	9.14325	9.30736	9.41889	9.40975	P	P	P	P	P	P	P	chr7	AK311103	ATTCATGTTAGCTTAATCATTAGGCATTAATGCCATCACTGCAATGCATATGTCAGCAAT	3978	uc010lea.1	UCSC_knowngene	+	79092301	79083307	noncoding	bidirectional	NM_012301	MAGI2	"membrane-associated guanylate kinase, WW and PDZ"	-	77646373	79082890
ASHG19A3A050458	110.951	20.8536	100.342	133.394	44.1822	55.9496	56.4293	6.89614	4.6589	6.78953	6.9586	5.37934	5.71082	5.61749	A	P	P	P	P	P	P	chr1		TATTTTTAGGCCCTTATCCTTAACCTTGCAGAAGAGTCGCTTGTGTTCCTGTCTTGGGTC	1826	AK054588	misc_RNA	-	118384393	118382256	noncoding	intergenic
ASHG19A3A048302	20.5373	11.9848	19.1061	47.0462	35.8426	39.5946	51.9408	4.52693	3.98485	4.505	5.40099	5.06598	5.19453	5.4917	A	P	P	P	P	P	P	chr1	MIG7	AGCCAACCATGGCAGCAAGTAGATGCTCTGGTCTTTAGATAGTCAGAAATGACACTTCTG	969	uc001dqd.1	UCSC_knowngene	-	94240930	94219111	noncoding	intergenic
ASHG19A3L0000621	26.427	15.18	25.4106	26.5719	30.1253	25.4465	37.7916	4.89506	4.26465	4.89431	4.5414	4.80561	4.52894	5.01185	A	P	P	P	P	P	P	chr13	lincRNA-NHLRC3	TCACTGAGTTTATGCCCCTAGGACATTGGTCTCCAAATTTTAGTATGAATCACTATTACT	762	BU854312	lincRNA	-	39883111	39882371	noncoding	intergenic
ASHG19A3L0000855	2001.13	1877.4	1591.23	2924.08	4549.91	4256.57	3961.74	10.8251	10.7398	10.552	11.6204	12.2923	12.1756	11.993	P	P	P	P	P	P	P	chr15	lincRNA-MEF2A	ATGAAGAGAGCCCTTCCCTCCCTGGCACTAGGCTGAGAGGGTTGGCTCTGGAAGTCAAAT	441	AA587541	lincRNA	+	99977379	99976938	noncoding	intergenic
ASHG19A3L0003012	29.0247	22.268	25.2543	140.576	113.022	138.163	142.359	5.02271	4.73958	4.88514	7.03777	6.78646	7.0543	7.01391	A	P	P	P	P	P	P	chr14	lincRNA-EGLN3-2	TTATAGGATCTTGACTGTATACACAGTTAAGCCATTTGTAGAGTTTTCCCTATTTGGGGG	724	BX110651	lincRNA	-	34528892	34528165	noncoding	intergenic
ASHG19A3L0001436	37.9826	28.6191	31.6223	26.3486	8.80186	16.2452	34.06	5.39601	5.06542	5.19728	4.52855	2.93551	3.83478	4.85253	A	P	P	P	A	P	P	chr4	lincRNA-TET2-3	TAGCAAATTGCATAGCGTTTTAAACACTGCAACCTGACTTAAGAGAGAATCCCCCTGTAA	467	BX100522	lincRNA	-	106274038	106093667	noncoding	intronic antisense	NM_017628	TET2	methylcytosine dioxygenase TET2 isoform b	+	106067031	106163928
ASHG19A3L0001436	37.9826	28.6191	31.6223	26.3486	8.80186	16.2452	34.06	5.39601	5.06542	5.19728	4.52855	2.93551	3.83478	4.85253	A	P	P	P	A	P	P	chr4	lincRNA-TET2-3	TAGCAAATTGCATAGCGTTTTAAACACTGCAACCTGACTTAAGAGAGAATCCCCCTGTAA	467	BX100522	lincRNA	-	106274038	106093667	noncoding	intronic antisense	NM_001127208	TET2	methylcytosine dioxygenase TET2 isoform a	+	106067841	106200960
ASHG19A3A052796	8214.12	7967.15	7210.31	2709.49	2740.99	2840.92	2957.2	12.8095	12.782	12.6798	11.5072	11.5615	11.5859	11.5875	M	M	M	P	P	P	P	chr15	LOC729082	TCCAAATCAGCAGAGGACCATTGTATGTATTGTCAGGTCTTTATATAAGAGTGAAACCTT	1894	NR_026757	RefSeq_NR	+	41591794	41576200	noncoding	intergenic
ASHG19A3A032464	89.9462	83.1526	86.9979	416.523	418.465	419.073	419.757	6.60766	6.49474	6.60045	8.69869	8.75725	8.7316	8.64967	P	P	P	P	P	P	P	chr7	AC009473.1	GCTCCCACTTAGAGACTGCAATGTAAGGTATGGAAACAGAATATTCTCTATAGAAACATA	692	ENST00000451066	Ensembl	-	7990340	7989483	noncoding	intergenic
ASHG19A3A025135	477.027	433.121	471.657	345.772	313.24	311.165	312.37	8.86564	8.73679	8.88765	8.41667	8.32338	8.28923	8.20468	P	P	P	P	P	P	P	chr4	RP11-2H3.2	TCCTGCCCAGCAGAATTTATATAGAGATGTGATGTTGGAGAACTTCAGAAATCTGGTTCC	125	ENST00000514008	Ensembl	+	387447	387322	noncoding	intergenic
ASHG19A3A028579	998.051	942.075	933.136	621.798	550.772	577.799	633.007	9.86064	9.77796	9.81466	9.31441	9.18352	9.22766	9.28239	P	P	P	P	P	P	P	chr5		AGGAAAATTGTATGTCAGGGTGTATTTCTGTGTGGGGTTGCAAGGGCAGGAAAGAAAAAA	457	AJ227862	misc_RNA	+	102118934	102118475	noncoding	intergenic
ASHG19A3L0003490	138.62	119.391	141.484	220.768	198.125	137.681	227.72	7.19886	6.99107	7.26345	7.7227	7.63425	7.04972	7.71945	P	P	P	P	P	P	P	chr11	lincRNA-CTNND1	CTGTACTTTCTTATTTATTTATTTAAAGATGGGGTCTCACTCTGTCACCCTAGCTATGCA	556	DB349331	lincRNA	-	57604068	57603513	noncoding	intergenic
ASHG19A3A049213	29.2306	21.8975	24554	24.5016	28.3917	18.1147	33.6207	5.03186	4.71659	14.3973	4.41339	4.71978	4.00569	4.8327	A	P	A	P	P	P	P	chr12	EP400NL	TGCTGTCAGATACTGGGAGAGCTGGGCTTGACTTTCTTTGCGTTTGCGGGAGGAATGCCC	4335	uc001ujx.1	UCSC_knowngene	+	132613429	132602690	noncoding	intergenic
ASHG19A3A050856	1067.26	1067.65	1129.57	654.207	1107.13	1234.52	1412.47	9.94408	9.94252	10.0811	9.39067	10.223	10.3697	10.4969	P	P	P	P	P	P	P	chr14	AL355916.1	TTTACAGATATTTATAGGACAATTTCCCTCCTGAGAGTGCCCAAGCATGGGGGATGGTGA	5103	ENST00000508827	Ensembl	-	62037371	62023037	noncoding	intergenic
ASHG19A3A018502	788.169	800.893	773.79	43.0415	77.2552	79.6817	106.745	9.53424	9.55914	9.56653	5.26281	6.2173	6.23227	6.57224	P	P	P	P	P	P	P	chr20		CTTCCCTATTCCATCCTTTGATGGGTGGCCTGTTACACGTTTGGAAATAAAAACAAGTGG	1013	BC002831	misc_RNA	+	57210789	57209827	noncoding	intergenic
ASHG19A3A022957	70.9617	79.9486	82.6241	133.569	66.2898	107.946	98.6044	6.28398	6.4416	6.52756	6.96076	5.99217	6.68424	6.44709	P	P	P	P	P	P	P	chr3	MT-ND5	ATTTTAGCCTCCACCATTGAATCTACCCCGAAAGGCCTAATTAAACTCTATTTTTTCTCC	1703	ENST00000460269	Ensembl	+	106619438	106617735	noncoding	intergenic
ASHG19A3A042359	37.7432	22.8878	25.7801	81.0602	29.627	60.9749	38.7281	5.38716	4.77229	4.91577	6.2268	4.78174	5.83819	5.04797	A	P	P	P	P	P	P	chr10	RP11-298E9.6	TAATCGCTAAGTAAAAACCACTGAAGAACAGGACAGAAGCCAATGACCACCTCACCTCCA	390	ENST00000417149	Ensembl	-	3299402	3282562	noncoding	intergenic
ASHG19A3L0003487	79.9517	51.5873	64.8448	133.745	60.325	38.5178	42.7615	6.45355	5.85171	6.18558	6.96325	5.85201	5.15311	5.20145	P	P	P	P	P	P	P	chr2	lincRNA-CWC22-2	CTACAAGCTGGCTTCCAGTCTCATCCCATTATTAAAAACTAACATCAACTTTCTACTTGT	786	BQ006080	lincRNA	+	180758386	180757616	noncoding	intergenic
ASHG19A3L0002780	77.7159	79.245	69.8998	146.925	63.5313	38.9858	54.8616	6.41334	6.43044	6.28974	7.1059	5.93014	5.17151	5.57575	P	P	P	P	P	P	P	chr15	lincRNA-NEDD4	TCTGGAAAAAATGCTGCCATATTGTCCCGCTCTGGAGTCCTTCAAGCCTGAATGAAAACA	4470	chr15:56088155-56092624+	lincRNA	+	56092624	56088155	noncoding	intergenic
ASHG19A3A026524	112.869	94.5428	102.392	27.4968	23.4739	31.7889	26.9297	6.92011	6.67878	6.81858	4.59448	4.42871	4.86486	4.48976	P	P	P	P	P	P	P	chr5		TCATTTGGTGACTGGAGAGGTGGATTGTAGCTACATGAGGACTCCAGACATTCACCAATA	2454	BC043160	misc_RNA	-	10197734	10195298	noncoding	intergenic
ASHG19A3A027432	9.58942	5.06611	14.742	22.2336	18.2936	14.9777	18.1683	3.46515	2.32463	4.14374	4.26239	4.05644	3.7011	3.87661	A	A	A	P	P	P	P	chr5	CTC-321K16.4	TCAGAGCTGGTAGGCCCTTAAGCTAGAGAAATTGAGGCCTTGGGGTTAGGGACCTGCCCA	2141	ENST00000508452	Ensembl	-	134989624	134984272	noncoding	intergenic
ASHG19A3A021837	29.085	31.7744	28.8174	350.301	360.006	366.213	361.652	5.02576	5.20423	5.07096	8.43633	8.52661	8.52029	8.4195	P	P	P	P	P	P	P	chr3	AK311218	GCGACCATGGTAACCAAAGTATACAGCCTGGAGTGAATGTTAATAAACAGGAAAGAAATG	2015	uc003fbc.2	UCSC_knowngene	-	156840791	156799456	noncoding	intergenic
ASHG19A3L0002511	70.0809	51.698	77.8254	56.242	138.781	156.385	180.531	6.26408	5.85436	6.44076	5.66514	7.09666	7.24779	7.36814	P	P	P	P	P	P	P	chr1	lincRNA-ZNF326	CACTATGCTGCCCCAAGGAATTACATTTTTATTTGTGTCAGACACGTGAATGTTAAAAAT	14916	chr1:90504105-90519020-	lincRNA	-	90519020	90504105	noncoding	intergenic
ASHG19A3L0000793	164.253	111.541	154.574	271.674	149.009	178.612	57.0851	7.43337	6.90204	7.38253	8.04361	7.20331	7.44402	5.6374	P	P	P	P	P	P	P	chr14	lincRNA-TCL1B	TAGCAATCCTGTTAAAGACCTATTCCTGGCTCTTGCTCCTGGTCTGATGGAGTTGATGAA	971	BE727398	lincRNA	+	96109176	96108384	noncoding	intergenic
ASHG19A3L0001224	70.4743	67.8352	78.6407	151.071	132.175	114.486	140.731	6.27262	6.21904	6.45518	7.14807	7.02329	6.7704	6.99293	P	P	P	P	P	P	P	chr2	lincRNA-SUCLG1-3	TAGTGCAGAAACCCTGACCCAATGGCTACCTTTGGGTAAGTGTTGGTGTCCTGTAACATA	17051	chr2:84696639-84713689-	lincRNA	-	84713689	84696639	noncoding	intergenic
ASHG19A3A019133	106.46	41.3818	117.726	229.722	99.4871	93.8753	100.147	6.84032	5.55499	7.00773	7.78897	6.59202	6.47707	6.46912	P	P	P	P	P	P	P	chr21	AP000240.7	TTGTTATCACAATAATTTATAGCCAGGATGCCTCTTCCACCTGAGAGTGAGCTGCCTGAG	406	ENST00000429843	Ensembl	+	30872706	30868366	noncoding	intergenic
ASHG19A3L0002330	23.2997	5.14915	21.2604	35.6671	17.0372	11.2889	17.3498	4.71278	2.32799	4.64863	4.98262	3.94509	3.2437	3.8016	A	P	P	P	P	A	P	chrX	lincRNA-CXorf26-1	GGTAGTGCTCAGCATGCCTTCTTTATTAATTTCCTATGATTGATGAACAAATTACCCAAA	904	BX433151	lincRNA	-	75406330	75405425	noncoding	intergenic
ASHG19A3A037608	145.885	133.627	150.705	226.333	244.975	161.539	290.358	7.26549	7.14613	7.34802	7.76429	7.961	7.29531	8.09777	P	P	P	P	P	P	P	chr9	RP11-375O18.2	GCTTCCGTGCCCAACTTAGAACTACACATCTGCTGCCTCTTGGTAACATGTCATTATAAG	328	ENST00000424980	Ensembl	-	82147257	82120718	noncoding	intergenic
ASHG19A3L0000921	134.345	86.3154	135.673	63.8564	127.213	46.7029	137.696	7.15676	6.5455	7.20536	5.8602	6.96805	5.44327	6.9622	P	P	P	P	P	P	P	chr17	lincRNA-MSI2	ACTCCGCTAAATCCCTGGACTAAGAATTGTTAATTTTTCTGCTTATTCACTGATGCTCTT	23851	chr17:55283426-55307276+	lincRNA	+	55307276	55283426	noncoding	intergenic
ASHG19A3A029210	21.5565	16.5063	20.3007	22.1925	15.9153	26.2507	26.1062	4.592	4.36762	4.58832	4.25994	3.83488	4.57619	4.4423	A	P	P	P	P	P	P	chr1	AL583842.3	TAGTGCGAAATGCGTGCGCCTCTAGTCTTAAACTTGGCGTTTGTATTAGTTGGGTTTCCT	649	ENST00000411746	Ensembl	+	142729975	142619122	noncoding	intergenic
ASHG19A3L0003183	20.4456	11.4013	15.2465	18.7225	35.8734	30.4659	41.2921	4.52115	3.92648	4.19591	4.00072	5.06762	4.80212	5.14883	A	P	A	P	P	P	P	chr13	lincRNA-STK24	CTATGTAAAGTGCTTGGACTTGGCTCATTGAAGTGCTCTTAGATGCTCCAATGATAGTAT	6191	chr13:99325739-99331929-	lincRNA	-	99331929	99325739	noncoding	intergenic
ASHG19A3A014158	89199.6	82667.3	81621.9	50493.5	62551.4	61984.3	61084.7	16.1599	16.1254	16.1254	15.8472	16.1045	16.0786	16.0186	P	P	P	P	P	P	P	chr2	EEF1A1P12	GTGATATGAGACAGATAGTTACAGTGGGTGTCATCAAAGCAGTGGACAAGAAGACTGCTG	1341	ENST00000359165	Ensembl	-	107315132	107313786	noncoding	intergenic
ASHG19A3L0000841	39.1996	33.2131	34.5281	32.7785	56.5052	56.4953	74.4093	5.44026	5.26495	5.31334	4.85519	5.75173	5.72643	6.03144	P	P	P	P	P	P	P	chr15	lincRNA-KIAA1024-1	GATCCTTTGTGCCCTTAGATGGAGAAAAGAAATGTATTGAGTAGAAGCTCTGAAAGTTTG	1004	AK304148	lincRNA	+	79675802	79603497	noncoding	exon sense-overlapping	NM_007364	TMED3	transmembrane emp24 domain-containing protein 3	+	79603490	79615189
ASHG19A3A026064	123.516	120.71	130.574	229.372	92.0467	213.758	126.354	7.04325	7.00643	7.15401	7.78496	6.47576	7.71475	6.82378	P	P	P	P	P	P	P	chr4		ACTGCTGTTGCCTCTATTTTCTTGGGGGTGAGTCTTCTCTTCCTTTCTTAAAAAGCAACT	1756	AK097799	misc_RNA	+	140100951	140099193	noncoding	intergenic
ASHG19A3A027423	96.8896	113.43	99.6523	243.873	64.5139	177.631	80.3492	6.71545	6.92306	6.78085	7.88077	5.95209	7.43573	6.14979	P	P	P	P	M	P	P	chr5	CTC-276P9.3	ACTGTTAAGCTCATGTTTCCTCTCCTGTTGCAAACAATTGTAAAAATGATTGGTATCTGC	541	ENST00000509530	Ensembl	-	134466939	134460069	noncoding	intergenic
ASHG19A3A029661	91.342	100.414	98.1914	265.889	59.4364	234.861	68.6656	6.62877	6.75872	6.76102	8.01196	5.83049	7.86172	5.91317	P	P	P	P	P	P	P	chr6		AGAAAAGAGCACCTCCTCATTTTAGAGTACATGGTGTGAACTCACTCTCAGCTGCCAAGT	3343	AL049252	NRED	-	30271892	30268570	noncoding	intergenic
ASHG19A3A027248	1708.64	1679.57	1677.77	808.517	758.234	791.929	738.351	10.5861	10.568	10.6264	9.72087	9.66392	9.70394	9.5168	P	P	P	P	P	P	P	chr5		GGATTTATGCTTTAAAAATATTGGTAGTTACTGCCAAGAATTGCCATCCAGAAACAGTGT	1270	AB002448	NRED	-	114540652	114539717	noncoding	intergenic
ASHG19A3L0002480	5351.7	4941.02	5102.66	3021.38	2330.13	2683.47	2930.57	12.2178	12.1166	12.2035	11.6623	11.3237	11.4979	11.5726	P	P	P	P	P	P	P	chr1	lincRNA-CD247	TTTGTATGTTTTGGGTGTGTCTATGTATGTATTAACATAACAGTTTTCACTGCCTAGGTG	4577	BC037864	lincRNA	+	167395664	167391146	noncoding	exon sense-overlapping	NM_001198786	POU2F1	"POU domain, class 2, transcription factor 1"	+	167190065	167396582
ASHG19A3L0002480	5351.7	4941.02	5102.66	3021.38	2330.13	2683.47	2930.57	12.2178	12.1166	12.2035	11.6623	11.3237	11.4979	11.5726	P	P	P	P	P	P	P	chr1	lincRNA-CD247	TTTGTATGTTTTGGGTGTGTCTATGTATGTATTAACATAACAGTTTTCACTGCCTAGGTG	4577	BC037864	lincRNA	+	167395664	167391146	noncoding	exon sense-overlapping	NM_001198783	POU2F1	"POU domain, class 2, transcription factor 1"	+	167298280	167396582
ASHG19A3L0002480	5351.7	4941.02	5102.66	3021.38	2330.13	2683.47	2930.57	12.2178	12.1166	12.2035	11.6623	11.3237	11.4979	11.5726	P	P	P	P	P	P	P	chr1	lincRNA-CD247	TTTGTATGTTTTGGGTGTGTCTATGTATGTATTAACATAACAGTTTTCACTGCCTAGGTG	4577	BC037864	lincRNA	+	167395664	167391146	noncoding	exon sense-overlapping	NM_002697	POU2F1	"POU domain, class 2, transcription factor 1"	+	167190065	167396582
ASHG19A3A037759	20.6316	23.294	33.5542	39.8046	43.2624	26.7899	41.3516	4.53251	4.796	5.27655	5.14803	5.34581	4.60646	5.15089	A	P	P	P	P	P	P	chr9		TTGGACTCGTAGGTACTGAGCGTCTTGTTGTGGAGACCAGATGCAATGCCTGGGCCTCCT	2663	AK055173	misc_RNA	-	98878693	98868942	noncoding	intergenic
ASHG19A3L0002977	327.746	305.441	326.048	76.1836	61.692	57.0953	64.905	8.36754	8.26075	8.39779	6.12869	5.88551	5.74145	5.82751	P	P	P	P	P	P	P	chr17	lincRNA-PGS1	AAAGGAATGAAGACGAAAACGTTTCTGAAAATGTGGGTGGAGACACCTGGGCCTTTACAG	174	BM956062	lincRNA	+	76360732	76360558	noncoding	intergenic
ASHG19A3A030139	102.88	80.7112	89.2394	57.1265	57.2407	60.2593	66.023	6.79887	6.45505	6.63206	5.68831	5.77376	5.81963	5.85117	P	P	P	P	P	P	P	chr6	C6orf147	AAAGCACTGATGGTTTCAGAATGTGCCTAAACCTGCACCAGTGAGGCAAGTATGCAAAAG	1444	NR_027005	RefSeq_NR	-	74020088	73983861	noncoding	intergenic
ASHG19A3L0000533	275.682	293.315	307.765	364.931	141.189	263.42	190.63	8.1193	8.20161	8.31918	8.4998	7.12323	8.03285	7.44985	P	P	P	P	P	P	P	chr12	lincRNA-GLIPR1	TGCAATATCTCTCCCTAGTTTGCCATTTGCCTTAATATTTGCCTATGATGCTGTTTAGAA	464	BX093893	lincRNA	+	75841894	75841430	noncoding	intergenic
ASHG19A3L0002574	278.166	272.587	282.826	234.964	157.722	215.257	221.282	8.13051	8.10559	8.20128	7.82241	7.29046	7.7244	7.67607	P	P	P	P	P	P	P	chr2	lincRNA-ZNF638	CTTCAAAAGCTGTTGAAATTGTTACTTCAACTTCTGCTGAGTCGGTGGATCAGACTCAGC	3515	AK293938	lincRNA	+	71622817	71503742	noncoding	exon sense-overlapping	NM_001014972	ZNF638	zinc finger protein 638	+	71558888	71662189
ASHG19A3L0002574	278.166	272.587	282.826	234.964	157.722	215.257	221.282	8.13051	8.10559	8.20128	7.82241	7.29046	7.7244	7.67607	P	P	P	P	P	P	P	chr2	lincRNA-ZNF638	CTTCAAAAGCTGTTGAAATTGTTACTTCAACTTCTGCTGAGTCGGTGGATCAGACTCAGC	3515	AK293938	lincRNA	+	71622817	71503742	noncoding	exon sense-overlapping	NM_014497	ZNF638	zinc finger protein 638	+	71558888	71662189
ASHG19A3L0002131	123.163	107.67	120.172	86.8955	134.739	143.488	175.459	7.04051	6.8518	7.03853	6.32957	7.04981	7.11184	7.3227	P	P	P	P	P	P	P	chr8	lincRNA-IL7-1	TAAAATGAATGTTCATAGTGCTTTCTCCCAGATAAGATCCCTTGCTAAGCACTTCATTTA	164	BE093687	lincRNA	-	79767276	79767145	noncoding	intergenic
ASHG19A3A039611	12.0364	22.9148	31.8471	343.277	279.831	283.622	282.572	3.76781	4.77421	5.20841	8.40406	8.16665	8.14877	8.05316	A	A	P	P	P	P	P	chrX	RP1-122K4.3	TCAGAAAAATCAGAAACTTTGGGGGACCTGAAACATCATCTCTCTGGACTTGTTGCAAAG	544	ENST00000391359	Ensembl	-	14006939	13998184	noncoding	intergenic
ASHG19A3L0000420	53.054	75.4157	85.9811	281.349	56.85	152.509	83.8845	5.86655	6.36322	6.58447	8.09625	5.76069	7.20605	6.21199	P	P	P	P	P	P	P	chr11	lincRNA-C11orf90	CATAAATCTATGTCTTGCTGCTCTTTTCATCCAGTTCTCCTTACTTTGCCAGGGTTTTAA	28276	chr11:93702877-93731152-	lincRNA	-	93731152	93702877	noncoding	intergenic
ASHG19A3L0003169	29.7424	25.3024	21.6527	34.9544	26.9312	22.9933	33.5051	5.05686	4.90202	4.67241	4.95415	4.63507	4.37708	4.82684	A	P	P	P	P	P	P	chr13	lincRNA-PIBF1	CAGCTTTATTAAAAATGCCTCAAAATAAGGAAGGCCTAAAAGCAATTGTCCTTCCCAGTG	462	AW268874	lincRNA	-	73596862	73596400	noncoding	intergenic
ASHG19A3L0002422	19.4764	15.0168	12.5204	31.9	30.7602	20.1793	33.738	4.45262	4.25054	3.92007	4.81939	4.83853	4.17627	4.83703	A	P	A	P	P	P	P	chr1	lincRNA-FAM5B-1	GCGAGTTGATGTTATTCTGGCCCTTCGAAAGAGATTTCCTTTTTAAAGAAATAGTGCTTT	865	BG196709	lincRNA	-	177599636	177362345	noncoding	intergenic
ASHG19A3A027359	80.1097	77.1726	76.1715	106.566	117.061	79.9844	136.673	6.4559	6.3945	6.40965	6.62648	6.84112	6.23865	6.9516	P	P	P	P	P	P	P	chr5	AC034228.7	AAGAAAGCAATGCAGGTAGAACAGTTTAGTTCTGCTGCCTCAGTCCCCAAAACCTGCATT	1578	ENST00000442687	Ensembl	-	131281198	131142923	noncoding	intergenic
ASHG19A3A024149	42.3918	19.3676	34.2836	22.1644	39.7989	30.0013	53.5538	5.54965	4.56628	5.30619	4.25875	5.22298	4.77907	5.54051	A	P	P	P	P	P	P	chr1	RP4-763G1.2	TTTTCTAAGGCACCAACTACTTCCTTCAAGCAGCAGCCAGAGATCTTTGCTTAATGGCTG	408	ENST00000230113	Ensembl	+	67998012	67995312	noncoding	intergenic
ASHG19A3L0000163	58.5275	64.8514	63.3685	86.1455	99.6236	77.6409	123.946	6.00417	6.1574	6.15477	6.3162	6.59516	6.1966	6.79887	P	P	P	P	P	P	P	chr1	lincRNA-NFIA-2	TATTAAAGAATGATGCCAGAGTGCATCTTCCGTAGTAGGTCCTGTGCTGTGTAAGAATCC	61	FN113698	lincRNA	-	62021386	62021324	noncoding	intergenic
ASHG19A3L0003224	63.0013	56.5818	76.5706	49.9697	96.7575	110.087	114.779	6.10525	5.97326	6.41603	5.49673	6.55306	6.71207	6.68302	P	P	P	P	P	P	P	chr22	lincRNA-RBFOX2	GGGGCATGTGCGTGCTTCCTGGGACATTCATTCAACTTTGCTGCTTGTTTGAAAATTTTT	678	CN479707	lincRNA	-	36479080	36478420	noncoding	intergenic
ASHG19A3A021601	46.1639	50.4615	47.5099	129.568	101.404	125.905	101.904	5.6726	5.82133	5.75889	6.91414	6.6223	6.91863	6.49765	P	P	P	P	P	P	P	chr3	BC043572	GGTCTGGTCTTACTTTTTAAGCAGGAAGAAGACTACAAACCACCATCTACCATCTGCCAG	1768	uc003eoc.1	UCSC_knowngene	-	131100319	131044145	noncoding	bidirectional	NM_152395	NUDT16	U8 snoRNA-decapping enzyme isoform 2	+	131100608	131107674
ASHG19A3A021601	46.1639	50.4615	47.5099	129.568	101.404	125.905	101.904	5.6726	5.82133	5.75889	6.91414	6.6223	6.91863	6.49765	P	P	P	P	P	P	P	chr3	BC043572	GGTCTGGTCTTACTTTTTAAGCAGGAAGAAGACTACAAACCACCATCTACCATCTGCCAG	1768	uc003eoc.1	UCSC_knowngene	-	131100319	131044145	noncoding	bidirectional	NM_001171905	NUDT16	U8 snoRNA-decapping enzyme isoform 3	+	131100514	131107674
ASHG19A3A021601	46.1639	50.4615	47.5099	129.568	101.404	125.905	101.904	5.6726	5.82133	5.75889	6.91414	6.6223	6.91863	6.49765	P	P	P	P	P	P	P	chr3	BC043572	GGTCTGGTCTTACTTTTTAAGCAGGAAGAAGACTACAAACCACCATCTACCATCTGCCAG	1768	uc003eoc.1	UCSC_knowngene	-	131100319	131044145	noncoding	intronic antisense	NM_001146003	NEK11	serine/threonine-protein kinase Nek11 isoform 3	+	130745693	131069309
ASHG19A3A021601	46.1639	50.4615	47.5099	129.568	101.404	125.905	101.904	5.6726	5.82133	5.75889	6.91414	6.6223	6.91863	6.49765	P	P	P	P	P	P	P	chr3	BC043572	GGTCTGGTCTTACTTTTTAAGCAGGAAGAAGACTACAAACCACCATCTACCATCTGCCAG	1768	uc003eoc.1	UCSC_knowngene	-	131100319	131044145	noncoding	intronic antisense	NM_024800	NEK11	serine/threonine-protein kinase Nek11 isoform 1	+	130745693	131069309
ASHG19A3A021601	46.1639	50.4615	47.5099	129.568	101.404	125.905	101.904	5.6726	5.82133	5.75889	6.91414	6.6223	6.91863	6.49765	P	P	P	P	P	P	P	chr3	BC043572	GGTCTGGTCTTACTTTTTAAGCAGGAAGAAGACTACAAACCACCATCTACCATCTGCCAG	1768	uc003eoc.1	UCSC_knowngene	-	131100319	131044145	noncoding	bidirectional	NM_001171906	NUDT16	U8 snoRNA-decapping enzyme isoform 1	+	131100608	131101641
ASHG19A3L0002060	5747.03	5659.57	6107.78	3739.38	3545.38	2710.52	3591.36	12.3201	12.3144	12.4574	11.9767	11.9325	11.5139	11.8634	P	P	P	P	P	P	P	chr8	lincRNA-DOK2	GAATCCAGACTCCATCCCAGAGCCTCCCCACCTCCATCAGGAATCTGCTCTCAGCCTGAC	442	BX953928	lincRNA	+	21714822	21714378	noncoding	intergenic
ASHG19A3A026689	17.6142	10.7141	16.283	34.5276	32.764	22.7064	36.2248	4.30218	3.84873	4.28538	4.93536	4.93056	4.35956	4.9514	A	P	A	P	P	P	P	chr5	CTD-2353F22.1	TTGGCCCTTATCCTTTGAAAGAGAATAAAGTAACAGCTGCTATTCTTTCAGCCAAGAAAG	478	ENST00000510740	Ensembl	-	36725275	36666315	noncoding	intronic antisense	NM_004172	SLC1A3	excitatory amino acid transporter 1 isoform 1	+	36606456	36688436
ASHG19A3A026689	17.6142	10.7141	16.283	34.5276	32.764	22.7064	36.2248	4.30218	3.84873	4.28538	4.93536	4.93056	4.35956	4.9514	A	P	A	P	P	P	P	chr5	CTD-2353F22.1	TTGGCCCTTATCCTTTGAAAGAGAATAAAGTAACAGCTGCTATTCTTTCAGCCAAGAAAG	478	ENST00000510740	Ensembl	-	36725275	36666315	noncoding	intronic antisense	NM_001166695	SLC1A3	excitatory amino acid transporter 1 isoform 2	+	36608430	36688436
ASHG19A3L0001581	149.153	148.107	145.761	141.527	197.294	131.075	234.653	7.29594	7.28422	7.30296	7.04826	7.62644	6.9776	7.76884	P	P	P	P	P	P	P	chr5	lincRNA-MARCH3	TTTTGCTCATCTGTCTAGATGTTTTTCTTCCCCTGGGCCATGGAGGGCTTTGTTTCACAA	2633	AX748201	lincRNA	+	126189758	126187125	noncoding	intergenic
ASHG19A3L0002859	34.2403	17.0989	24.6757	605.238	65.039	56.3057	83.2047	5.25622	4.41369	4.85053	9.27345	5.96287	5.72108	6.19876	A	P	P	P	P	P	P	chr6	lincRNA-PREP-2	TTTTAGTAGTGGTTATGAAGGTGATGCTTTCTGCCAGAACTCAGACTGTTCTTGAGTGCT	11376	chr6:105939837-105951212-	lincRNA	-	105951212	105939837	noncoding	intergenic
ASHG19A3L0000508	37.6624	40.201	38.6797	59.4946	60.0493	65.4318	78.7432	5.38411	5.51591	5.47709	5.75382	5.84537	5.94899	6.11676	P	P	P	P	P	P	P	chr12	lincRNA-KIAA0748	TTAATCCAGAGCTGTTAGGTCTCTGCACTTATGATTGTGCTGGTTGTTCCTTGCACAAGG	13501	chr12:55389508-55403008-	lincRNA	-	55403008	55389508	noncoding	intergenic
ASHG19A3L0002599	142.674	141.891	192.976	157.463	244.791	146.811	292.404	7.23798	7.22939	7.68498	7.21169	7.95947	7.14891	8.10698	P	P	P	P	P	P	P	chr12	lincRNA-A2ML1	CTCTGTCAATCCACTCTTCCTTTTCTCCTTTAAAAGCCCATGCATGGTTTGTTTATTGAG	681	AV651118	lincRNA	-	9066642	9065961	noncoding	bidirectional	NM_004426	PHC1	polyhomeotic-like protein 1	+	9067315	9094060
ASHG19A3L0003213	57.0955	37.8537	46.955	55.2898	73.5486	52.3662	80.5416	5.96885	5.4382	5.74326	5.64228	6.14372	5.61169	6.15392	M	P	P	P	P	M	P	chr8	lincRNA-GSDMC-2	TCTTTTGTCTCTCCAAAGACAACCAAGGGTGAAGGGCTCTCTGTGTATCTTTCTAGACAT	390	BU664763	lincRNA	+	129185668	129185278	noncoding	intergenic
ASHG19A3L0001470	307.258	257.587	296.283	166.421	302.954	371.766	326.897	8.27604	8.02922	8.26488	7.29698	8.27643	8.54797	8.27313	P	P	P	P	P	P	P	chr4	lincRNA-CD38	CAGTGTCCATCAAAGTAGAGATGGCTCCCCTCACTTGGCAAGCCAGGACTTTGATTTTTT	10376	chr4:15911552-15921927-	lincRNA	-	15921927	15911552	noncoding	intergenic
ASHG19A3L0002931	247.708	204.663	239.159	217.475	326.254	408.756	420.292	7.98408	7.72591	7.96293	7.69849	8.38747	8.69329	8.65056	M	M	P	P	P	P	P	chr12	lincRNA-DYRK2-2	GGACATGCATCAATCAATGTTGGTTTGTTTCTTCCATCTCTTGCTCTTCCTAGCCCCACT	324	BF352825	lincRNA	-	68315360	68315048	noncoding	intergenic
ASHG19A3A000194	70.1997	87.7467	88.5122	196.05	104.91	175.03	100.409	6.2666	6.57046	6.62242	7.54429	6.67169	7.41301	6.4729	P	P	P	P	P	P	P	chrX	RP11-265P11.2	TGCAGTGGACCCTGTTGCCTACCCGAGTGAAGATAAGAATACCTATTTTAAAGTTCTGTT	673	ENST00000429281	Ensembl	-	39186615	39164887	noncoding	intergenic
ASHG19A3A055303	323.515	361.214	330.85	481.013	274.262	447.302	402.354	8.34935	8.49497	8.41886	8.92595	8.13739	8.83449	8.58338	M	P	M	M	P	P	P	chr14	MEG3	GAAAAACACACTGATTATCATAATGAGCAGGTTCCCAGTGCCCCCGACAAGCCCCTGCTG	1760	uc010txe.1	UCSC_knowngene	+	101327368	101292444	noncoding	intergenic
ASHG19A3L0001027	50.9774	43.7106	64.6067	86.4366	28.5216	18.0101	41.7427	5.80892	5.62798	6.1794	6.32261	4.72583	3.99627	5.16498	P	P	P	P	P	P	P	chr2	lincRNA-IL1RL1	TCACAATTATTATAGATACTACCTGCTTCATCAACCCAGGGAGCTCAGGAGTGTTGCCAC	13676	chr2:102880643-102894318+	lincRNA	+	102894318	102880643	noncoding	intergenic
ASHG19A3L0001606	665.958	618.357	640.171	1022.33	1051.86	620.776	1093.6	9.31274	9.21193	9.30762	10.0716	10.154	9.33331	10.1166	P	P	P	P	P	P	P	chr5	lincRNA-IL12B-2	TGCTGTAATAATTCTATGTAGCAACAACCCTCCTCCCAAACCTCAATAGCTAACAAAAAA	478	BF515427	lincRNA	-	159031576	159031098	noncoding	intergenic
ASHG19A3L0002752	577.125	596.886	605.953	1695.57	1501.48	1666.58	1620.09	9.11408	9.15783	9.22846	10.8271	10.6815	10.8045	10.7015	P	P	P	P	P	P	P	chr15	lincRNA-RCN2	ATTCCGGGTAGTCTGCAGTCCCCAGATCTCGGACACATCTGTGGTGCTGTCCATGGACAA	90	EC495588	lincRNA	-	77272065	77271632	noncoding	intergenic
ASHG19A3L0001579	184.612	186.577	182.677	117.845	209.915	126.508	248.393	7.58989	7.59825	7.61027	6.77172	7.72005	6.92465	7.85795	P	P	P	P	P	P	P	chr5	lincRNA-GRAMD3-1	AGTACAGGCAAGTTCCCCAGACTCCCAAGCGTTTCTCTCCCATTAGGAGACATTTTAAAA	926	exon3076+	lincRNA	+	124748140	124747215	noncoding
ASHG19A3A025860	497.627	520.575	620.455	1819.06	3610.32	1697.28	3732.35	8.92025	8.97702	9.264	10.921	11.964	10.8286	11.9143	P	P	P	P	P	P	P	chr4	RP11-556I14.1	TAATGCCTCTCCCTGGATACTAAATTTACTGACCCTGCCTAGGACCGAGAAGATTGATGA	472	ENST00000506148	Ensembl	+	106038002	105828513	noncoding	intergenic
ASHG19A3L0000539	159.894	142.055	157.505	94.2504	149.302	168.877	192.714	7.39313	7.23162	7.40556	6.44941	7.20551	7.35947	7.46891	P	P	P	P	P	P	P	chr12	lincRNA-RASSF9-1	TTTTTGTTTGGTTTGGTTTTGGTTTTGGTTTTAGTGGAAGAGTTAAATAATGGGCAAAGA	801	CF594357	lincRNA	+	86100435	86099664	noncoding	intergenic
ASHG19A3A046567	56.8647	25.1632	78.8499	33.8811	119.424	132.431	134.063	5.9644	4.89573	6.4607	4.90581	6.86861	6.99506	6.91795	A	P	P	P	P	P	P	chr11	AP001187.11	TATTACCGGAAATAAATGGATGAGGCTTCCAAAAGGACCAGAGGCATCCTCATCCAGCAT	411	ENST00000428947	Ensembl	+	64649417	64649006	noncoding	intergenic
ASHG19A3L0001641	55.0419	36.2957	46.0947	29.507	85.7299	94.3545	104.896	5.91849	5.38232	5.71985	4.69949	6.37093	6.48458	6.54381	M	P	P	P	P	P	P	chr5	lincRNA-IRX1-1	ACATCATGTCTTCCAGGGCTACCTACAAGAGGGTGACATTTTACCATAGAAACTCCATGG	13576	chr5:3565525-3579100+	lincRNA	+	3579100	3565525	noncoding	intergenic
ASHG19A3A055170	17.6879	6.54528	9.09052	18.5407	22.4226	21.5099	25.2179	4.30865	3.32307	3.48987	3.98631	4.36216	4.27308	4.39399	A	P	A	P	P	P	P	chr2	BC043555	AATCCTCAGCACAACTGCTACCACCAGGACACAGTGAGGAGGTGGTCATCAGCAACCCAG	1892	uc002vre.2	UCSC_knowngene	+	231769231	231751260	noncoding	intergenic
ASHG19A3L0001012	126.625	137.515	126.049	113.101	94.305	112.898	92.2249	7.07623	7.18668	7.10369	6.71162	6.5178	6.74802	6.34868	P	P	P	P	P	P	P	chr18	lincRNA-ADCYAP1	TCTCGTATTTCCTTGATCTTGCATCCACCTTTTCCAATGAGAGAGCCACACTGACTAGCA	379	AI638100	lincRNA	-	999875	999612	noncoding	intergenic
ASHG19A3A029251	308.916	313.491	243.937	540.115	497.15	531.125	519.742	8.28328	8.2968	7.99137	9.10614	9.03259	9.09618	8.97823	P	P	P	P	P	P	P	chr1	CR936796	GGCAAAGGTTCAGACATACGACGTTTGTTTTTAAAATCTTTCTACAGCCTTGTATCCTTT	4096	uc001eiw.1	UCSC_knowngene	+	143257763	142618798	noncoding	intergenic
ASHG19A3A018644	55.897	56.0677	55.9396	522.145	498.723	506.381	476.362	5.94114	5.96138	5.98358	9.05653	9.04042	9.03129	8.84103	P	P	P	P	P	P	P	chr21	AJ006998.2	TTGCTATAAAGAGTAGGCAAATGGAAATCTTTCCCCAAAGGGCACACTGGGATTGTTAGG	1000	ENST00000449602	Ensembl	-	16774624	16742840	noncoding	intergenic
ASHG19A3A016181	811.808	709.639	718.402	746.368	650.944	699.12	700.575	9.57036	9.39552	9.46136	9.59434	9.44054	9.51814	9.44223	P	P	P	P	P	P	P	chr2	AC068491.3	GTAACTGGGTATGTGAAGTTCTGTTCAGTTCTGGGGGGAAATTTATTCTGAGTTGTGCTG	1241	ENST00000449539	Ensembl	+	112142569	112141328	noncoding	intergenic
ASHG19A3A054861	31.7609	23.0497	30.7196	47.6257	43.9471	32.658	49.873	5.14708	4.78312	5.1588	5.41849	5.37034	4.90409	5.42925	A	P	P	P	P	P	P	chr16		GGACACCTGTGCCAAACTCACTTAAAACGGATGTATTTTATTGTATAAATTATGCCTCAA	2034	BC040918	RNAdb	+	85183041	85170755	noncoding	intergenic
ASHG19A3A043334	4087.59	4107.6	3830.26	3309.66	2819.13	3120.71	3350.6	11.8327	11.8482	11.8031	11.7996	11.6026	11.7223	11.7655	P	P	P	P	P	P	P	chr10	DQ596646	AGGCAACTGGTGTTTCTGCGAGAATGGAATGGAATGTGGTTGAAATTTTGTGTTGTTTTT	2195	uc001lcv.1	UCSC_knowngene	-	118590480	118588285	noncoding	intergenic
ASHG19A3L0001529	258.747	245.333	241.264	437.167	374.168	242.617	443.772	8.04046	7.96665	7.97695	8.77237	8.58713	7.91096	8.73714	P	P	P	P	P	P	P	chr4	lincRNA-THAP6	TGGGCTCAGGGCAATCTCATCTCTTCTTTTTTCTCCTGCTCACACCCTTTGTCTAAAAAA	548	DB330880	lincRNA	-	76472540	76469711	noncoding	intergenic
ASHG19A3L0001992	18.6757	24.0834	20.0775	44.3997	35.3298	17.2643	46.061	4.38913	4.84097	4.57429	5.31625	5.0454	3.93061	5.30979	A	P	P	P	P	P	P	chr8	lincRNA-KLHL38	TTTGTGGTGTGTCCTTCAGTCCATAATGAACAAACTTGTACTGAGGGTCAATGGGCTGTC	572	DB077679	lincRNA	+	124627051	124626480	noncoding	intergenic
ASHG19A3A032650	76.666	89.2531	97.3276	131.906	81.6914	116.999	105.304	6.39345	6.59612	6.75006	6.94332	6.30306	6.80667	6.54952	P	P	P	M	P	P	P	chr7		CACTCACGTCTTCAAACTCTTCCTTTCTATTGTGATCTTGCCCCAGTATTTAAAAATTGT	1322	BC068090	misc_RNA	-	32954696	32953392	noncoding	intergenic
ASHG19A3L0002089	5	5.41045	5	436.233	446.956	423.908	454.85	2.37766	2.37922	2.39437	8.76687	8.86727	8.75056	8.7737	A	A	A	P	P	P	P	chr8	lincRNA-UBE2V2-2	GGCACAGGTCACATGAACTTTGAAAGTGTGATATAAGTGAAAAGTGATTATAGGTTGGTA	1671	BC029586	lincRNA	-	49647793	49623350	noncoding	exon sense-overlapping	NM_001142857	EFCAB1	EF-hand calcium-binding domain-containing	-	49627473	49647870
ASHG19A3L0002089	5	5.41045	5	436.233	446.956	423.908	454.85	2.37766	2.37922	2.39437	8.76687	8.86727	8.75056	8.7737	A	A	A	P	P	P	P	chr8	lincRNA-UBE2V2-2	GGCACAGGTCACATGAACTTTGAAAGTGTGATATAAGTGAAAAGTGATTATAGGTTGGTA	1671	BC029586	lincRNA	-	49647793	49623350	noncoding	exon sense-overlapping	NM_024593	EFCAB1	EF-hand calcium-binding domain-containing	-	49635952	49647870
ASHG19A3L0001919	27.6431	23.74	31.7221	34.9409	51.6211	25.9565	63.716	4.95378	4.82156	5.20187	4.95341	5.6125	4.55969	5.79947	A	P	P	P	P	P	P	chr7	lincRNA-INHBA-3	GAGCTCCTGTCTCAGCTTTTGGGATATGAAGTCATCAAAAATAAATGAGGATGTAAAGAA	11101	chr7:41630075-41641175+	lincRNA	+	41641175	41630075	noncoding	intergenic
ASHG19A3L0002708	27.132	18.2663	33.0128	18.4782	59.8308	28.6677	56.2236	4.93019	4.49519	5.25496	3.9809	5.8401	4.70943	5.61169	A	P	P	P	P	P	P	chr16	lincRNA-FA2H-2	CTTAAACATGTAAGTGCTTACACCAAAATGTGCTGTTGGCCTCCGAGGAAAGAAGGAACT	3976	chr16:74903295-74907270-	lincRNA	-	74907270	74903295	noncoding	intergenic
ASHG19A3L0000922	269.43	367.363	368.962	640.926	1016.63	500.851	1210.78	8.091	8.5175	8.57119	9.36148	10.1085	9.01442	10.2685	P	P	P	P	P	P	P	chr17	lincRNA-GNA13	CTCCCTCTGACCCCATGAAAAGCTGTCATTTCCTAGGTAACTGGAGTTGCAGACAGCACA	359	AA594021	lincRNA	-	63099901	63099542	noncoding	intergenic
ASHG19A3L0000168	326.634	317.526	293.106	341.194	365.334	369.014	374.645	8.36151	8.31581	8.25121	8.3943	8.54816	8.53496	8.4749	P	P	P	P	P	P	P	chr1	lincRNA-LRRIQ3-2	TGTAGAAAACTAATTCTGATTAGCACTAAGATTAGTCATTCTAGTCTCCCCGGGATACAG	192	BE091553	lincRNA	+	73033934	73033756	noncoding	intergenic
ASHG19A3A021408	24.2253	21.8931	28.0488	30.7182	22.7931	26.8307	25.8822	4.76835	4.71612	5.0328	4.75884	4.38513	4.61012	4.43138	A	P	P	P	P	P	P	chr3	RP11-231E6.1	TAAAACCAGTCTAAGTTTCGCCTTCTCAGGCATACTTCCACTACATTGTGTTTACAATGT	1583	ENST00000486726	Ensembl	-	112127981	112115473	noncoding	intergenic
ASHG19A3A040745	673.629	181.248	201.899	503.706	116.58	416.142	173.499	9.32754	7.55879	7.74405	8.99977	6.83548	8.72082	7.30597	P	P	P	P	P	P	P	chrX	RP11-147O5.1	TTCTTTCATTCAAAGACAGGACTTACATGAGCCTTCCTTTCTGCTGTTCCTTTTCTTAAA	7619	ENST00000449605	Ensembl	+	21920026	21911717	noncoding	intergenic
ASHG19A3A023002	22.6577	16.9851	14.5471	292.101	332.949	355.518	353.088	4.66958	4.40495	4.12223	8.15215	8.41836	8.47889	8.38373	A	P	A	P	P	P	P	chr3	RP11-180K7.1	ACAAAAAGAGAGAGTTTCACATAAAGAATGATCAGTAAGGACAACGCTGGAGATCCTGAG	2632	ENST00000496067	Ensembl	+	112541911	112521423	noncoding	natural antisense	NM_001008784	CD200R1L	cell surface glycoprotein CD200 receptor 2	-	112534555	112564797
ASHG19A3A023002	22.6577	16.9851	14.5471	292.101	332.949	355.518	353.088	4.66958	4.40495	4.12223	8.15215	8.41836	8.47889	8.38373	A	P	A	P	P	P	P	chr3	RP11-180K7.1	ACAAAAAGAGAGAGTTTCACATAAAGAATGATCAGTAAGGACAACGCTGGAGATCCTGAG	2632	ENST00000496067	Ensembl	+	112541911	112521423	noncoding	natural antisense	NM_001199215	CD200R1L	cell surface glycoprotein CD200 receptor 2	-	112534555	112564797
ASHG19A3A041285	2658.93	2408.81	2838.94	961.661	1116.93	1270.73	1155.85	11.2184	11.0929	11.3784	9.98956	10.2401	10.4171	10.2025	P	P	P	P	P	P	P	chrX	EEF1A1P15	ATCATGGCAACATTGCTGGTGACAGCAAACATAATCAACCAATTGGCTTCACTGCTCAGG	1352	ENST00000395772	Ensembl	+	97645918	97644507	noncoding	intergenic
ASHG19A3A027913	496.453	494.406	474.743	420.014	332.913	363.026	433.86	8.91729	8.90962	8.89688	8.70971	8.41811	8.51105	8.69654	P	P	P	P	P	P	P	chr5	BX648541	GAGACAGGCAGGCCAGATATTGGTTACTTTGATTTTAGTTGACAAAGTTTATTTGCTTTT	3239	uc003jei.2	UCSC_knowngene	+	8463208	8457803	noncoding	intergenic
ASHG19A3L0000773	8.82943	17.8615	14.5365	26.0861	26.3921	17.6254	38.7755	3.34948	4.46654	4.12095	4.51159	4.60462	3.96116	5.04974	A	A	A	P	P	P	P	chr14	lincRNA-C14orf166B-1	TCTCATTCCCTGAGCAATATTGAACATCCAGAGAGACAACCAAATCCTGGGTATCTGGGT	17001	chr14:77465047-77482047-	lincRNA	-	77482047	77465047	noncoding	intergenic
ASHG19A3A039320	1155.91	1223.11	1204.67	475.414	444.114	416.775	503.953	10.0517	10.1396	10.1651	8.9067	8.85496	8.7229	8.93527	P	P	P	P	P	P	P	chr9	RP11-65J3.1	TTCTTTCCCTGAGGACCATCTGGAGTGGACGCGTGCACTACCCCTCTCTGAATACACCCT	545	ENST00000423122	Ensembl	+	132121817	132104121	noncoding	intergenic
ASHG19A3A018101	61.448	57.2746	65.3694	62.6761	65.4236	61.1218	77.5969	6.06777	5.99009	6.19551	5.83245	5.9721	5.8414	6.09454	P	P	P	P	P	P	P	chr20	RP1-122P22.2	TCGTCTTTGGGGCCACCGGTCGCCCCCGCCTCCGGGACCTGCGGGGAGGGCCCGCGAGAG	415	ENST00000412571	Ensembl	+	19789926	19738791	noncoding	intergenic
ASHG19A3A020788	77887.8	79593.6	76414.3	26324.9	31714.5	32748	33483.1	15.9748	16.0767	16.0508	14.8918	15.1372	15.1647	15.1323	P	P	P	P	P	P	P	chr3	AC104297.1	AATCTGCCTGCACGGTACCAACAGATGTGGATAAGTGGTTCCATTACCAGAAAAACTTAA	870	ENST00000393779	Ensembl	-	17914090	17913220	noncoding	intergenic
ASHG19A3L0001372	21.5491	5.82284	23.9038	14.7389	30.8123	31.3218	39.3261	4.59102	3.03101	4.80469	3.62188	4.84206	4.84281	5.0688	A	P	P	P	P	P	P	chr3	lincRNA-STT3B-3	TTCTCTGCTTGCATTAGCAGTCAGGTGGGTTCCTCAGTAGGCTTAAAGCCAATTCATGTT	23226	chr3:31042296-31065521+	lincRNA	+	31065521	31042296	noncoding	intergenic
ASHG19A3A035845	40.0586	34.8469	44.7566	32.3989	43.598	65.2849	62.5291	5.46985	5.32838	5.68005	4.83853	5.35964	5.94571	5.77038	P	P	P	P	P	P	P	chr8	AK055514	TCCTTCAACTAAGGCTGCAAATTGAAAATGTGAAGAACCTTGCCTGCTTGAACCAGCCTG	2367	uc003xyc.1	UCSC_knowngene	-	70016425	69824037	noncoding	intergenic
ASHG19A3L0002946	54.5198	33.3462	35.5577	82.5327	21.0011	50.3958	30.111	5.90739	5.26969	5.35729	6.25291	4.26939	5.55421	4.66339	P	P	P	P	P	P	P	chr5	lincRNA-GABRP-1	TAGAGGTTTACTGTCAGGCCAACAGTTATGAAATGGTGCTACTCCACTCTTTCCTTACCC	870	CD557263	lincRNA	-	170280597	170279763	noncoding	intergenic
ASHG19A3A017605	110.737	120.595	118.366	199.585	76.127	143.791	118.781	6.89327	7.0047	7.01672	7.56955	6.19807	7.11581	6.73779	P	P	P	P	P	P	P	chr1	HSPC157	TTCCTGGAGTCATTTGTGGGAGTTAGGGTCTTATCCTGATCTTTCCTCGTCCCCCGCTCC	1039	NR_023919	RefSeq_NR	+	22357713	22352041	noncoding	intergenic
ASHG19A3A009287	14726.2	14430.4	13294.5	7578.47	7096.16	7378.91	7047.44	13.6288	13.6025	13.541	13.029	12.9564	12.9763	12.8515	P	P	P	P	P	P	P	chr1		TCATCTCCAAACTTGACTACTATTGGGAAGATGTGTATAAAAGCATCGCTTTGGGAATTT	2269	AK093982	misc_RNA	-	197476148	197473880	noncoding	exon sense-overlapping	NM_001195215	DENND1B	DENN domain-containing protein 1B isoform 3	-	197473878	197744623
ASHG19A3L0002391	14.2442	18.6282	21.3638	30.8967	22.3863	22.674	20.7681	4.01028	4.51917	4.65508	4.76801	4.35829	4.35637	4.08368	A	A	P	P	P	P	P	chr1	lincRNA-ALG14	TTAATATTAAGCGAAAGTACCCAAGCTTTGGAGAAACTGTCTCCTTCTGAAAGGTTATTT	554	DB321928	lincRNA	+	95440516	95439962	noncoding	intergenic
ASHG19A3L0003166	109.912	43.4337	111.506	246.345	129.302	148.404	165.138	6.88277	5.61941	6.93891	7.89424	6.9913	7.16508	7.23068	P	P	P	P	P	P	P	chr13	lincRNA-SERP2-4	ATGAAGACTCTGCTCCTGGATCAGGAATGCTTTTTTGTCCCTGTTTTTGGATTTTCCACC	534	DB068418	lincRNA	+	44596796	44482804	noncoding	intergenic
ASHG19A3L0001363	238.717	236.561	230.586	1072.06	978.514	1052.3	1144.22	7.93602	7.91772	7.91448	10.1484	10.0545	10.1336	10.1871	P	P	P	P	P	P	P	chr3	lincRNA-ATP13A3	TGTTGTGCGTTTGTAGACTTCAAACTTTGCTAGTGAGAGGCTGCTTATATTATTATCTAG	642	BQ187752	lincRNA	-	194198173	194197527	noncoding	intergenic
ASHG19A3A040708	78.5814	70.8863	81.4327	56.9671	80.1779	80.8228	101.808	6.4303	6.28066	6.50622	5.68511	6.27293	6.25236	6.49621	P	P	P	P	P	P	P	chrX	BC032506	AATTGGTTGCGACTTTTTTGTCTCTTCCCGATTCTGGCATTCCAGAGGGTCAATAGGTTC	2419	uc004cxd.2	UCSC_knowngene	+	15721475	15719056	noncoding	intergenic
ASHG19A3L0002630	52.1389	40.1873	52.6037	30.311	64.3425	75.2864	87.9504	5.84157	5.51517	5.89784	4.73941	5.94801	6.15192	6.2795	P	P	P	P	P	P	P	chr15	lincRNA-ZNF592	CTTTTAAAAGCTACTTAAAGATACCATTTCCCTGCTTCCAGGAGAAATATACATGCACTA	436	AI061264	lincRNA	+	85289117	85288681	noncoding	intergenic
ASHG19A3A010250	330.813	312.964	327.921	552.403	1140.17	1141.91	1170.39	8.3809	8.29272	8.40573	9.14197	10.2753	10.2578	10.2179	P	P	P	P	P	P	P	chr18	DM004440	CCCGGGCGCTGCTCTGACCCCTCGTGTCTTGTGTTGCAGCCGGAGGGACGCAGGTCCGCA	109	uc010dmv.2	UCSC_knowngene	-	33484889	33484780	noncoding	intergenic
ASHG19A3L0002739	8.96909	14.5203	11.4473	45.2225	19.7602	38.6544	27.3983	3.37199	4.21133	3.80217	5.34369	4.1752	5.16024	4.51585	A	A	A	P	P	P	P	chr11	lincRNA-BLID-3	AGTTAGGGTAGTCAGCAATTTAACAACGTCCTTGGTTTTGAAGAAAGTCTCCAGCCTTGG	153	CV311274	lincRNA	+	121701295	121701145	noncoding	intergenic
ASHG19A3L0000830	135.368	167.097	161.578	405.914	186.272	322.787	190.167	7.16734	7.44693	7.43921	8.6566	7.54038	8.34079	7.44522	P	P	P	P	P	P	P	chr15	lincRNA-STRA6	ACACTGAGCCTTGTCTTCCGCTTCCTTCTCATTCTGGATCATCTTGATTATTGCATTCCT	667	BM982048	lincRNA	-	74513896	74510857	noncoding	intergenic
ASHG19A3L0000623	45.4775	45.4747	49.3615	85.1907	29.9932	61.1982	37.0403	5.65235	5.68212	5.81335	6.29932	4.79943	5.84343	4.98358	P	P	P	P	P	P	P	chr13	lincRNA-C13orf15-1	ACTCCAAACTGTGACTGAGTCCACAGCCCATTTGCCCTTAAGTCATTATCCAAAAGAAGC	56751	chr13:42065250-42122000-	lincRNA	-	42122000	42065250	noncoding	intergenic
ASHG19A3A044610	112.592	117.511	119.327	281.554	134.364	238.504	112.522	6.91678	6.96878	7.0285	8.09765	7.04616	7.88267	6.65016	P	P	P	P	P	P	P	chr10	RP11-282I1.1	ATGCTTGAAAATAAATGGCACCTGTGGAGAAAGTGCCCCATCCCTGATTATGTCATCGGA	831	ENST00000448347	Ensembl	+	125277224	125115965	noncoding	intergenic
ASHG19A3A049547	94.0798	91.5607	100.106	203.178	180.741	108.42	212.783	6.67451	6.63301	6.78681	7.59762	7.49388	6.69111	7.61782	P	P	P	P	P	P	P	chr13	RP11-305D15.2	TAAAATACAGTTGTGCTGTGATGTAAATCCCCTCATCCTGGAGCAGCTGAGCAAGGTCTA	829	ENST00000433480	Ensembl	-	48877797	48870962	noncoding	bidirectional	NM_000321	RB1	retinoblastoma-associated protein	+	48877882	49056026
ASHG19A3A014527	199.005	191.874	183.745	134.066	158.161	137.486	167.401	7.69644	7.63508	7.6194	6.96694	7.29594	7.04649	7.25061	P	P	P	P	P	P	P	chr2	AC005042.4	TGGACCCCTTACTGTGTTAACTGCTAATCAGCCTTCTGTAAAAATGATATTGCAAATTCA	825	ENST00000442666	Ensembl	-	159591330	159535167	noncoding	intronic antisense	NM_003628	PKP4	plakophilin-4 isoform a	+	159313475	159537940
ASHG19A3A014527	199.005	191.874	183.745	134.066	158.161	137.486	167.401	7.69644	7.63508	7.6194	6.96694	7.29594	7.04649	7.25061	P	P	P	P	P	P	P	chr2	AC005042.4	TGGACCCCTTACTGTGTTAACTGCTAATCAGCCTTCTGTAAAAATGATATTGCAAATTCA	825	ENST00000442666	Ensembl	-	159591330	159535167	noncoding	intronic antisense	NM_001005476	PKP4	plakophilin-4 isoform b	+	159313475	159537940
ASHG19A3A023900	202.776	184.804	199.878	187.936	183.681	200.039	193.874	7.72055	7.58404	7.73104	7.48244	7.5162	7.61326	7.47953	P	P	P	P	P	P	P	chr4	RP11-539L10.3	GCTAGTTTAAGGAAATATCTGACGCTGATAACCATGTCCCAAGCACTGCTCTAAGTTCCC	422	ENST00000515205	Ensembl	-	6675557	6672451	noncoding	intergenic
ASHG19A3L0002215	28.9074	26.6031	18.2484	19.2579	34.1365	36.94	40.2854	5.0173	4.97109	4.43693	4.04484	4.99198	5.09224	5.10941	P	P	P	P	P	P	P	chr9	lincRNA-VLDLR-1	TGAAAATCCTTCTGAATGATGTTCCTGTGCTTTGTAAAAACGCATCTAGCATCCCACAGG	899	CD247089	lincRNA	+	2288332	2276006	noncoding	intergenic
ASHG19A3A034008	77.4015	75.2802	83.708	91.4074	141.104	159.432	163.963	6.40648	6.36099	6.54689	6.4052	7.12206	7.27493	7.221	P	P	P	P	P	P	P	chr7	AC010082.1	AACGACAAAGGCTGTGAATCTGCATCCTAGTCTTAGCAGTCCCTCTGATTCTCATGATGA	471	ENST00000425071	Ensembl	+	18367235	18191397	noncoding	exon sense-overlapping	NM_001204144	HDAC9	histone deacetylase 9 isoform 6	+	18126571	18708466
ASHG19A3L0003347	18.5042	11.2118	17.3533	17.5723	27.5254	38.4405	39.9138	4.37496	3.90573	4.36724	3.90185	4.67098	5.15101	5.09444	A	P	A	P	P	P	P	chr2	lincRNA-ZFP36L2-3	AAGCTGATTCAAGTCAAGTTTGAGCCATTCGCAACCCTTAGTACTGCAAGCCGCGTTTTT	7786	chr2:43241023-43248808+	lincRNA	+	43248808	43241023	noncoding	intergenic
ASHG19A3A028540	41.7705	11.394	18.8455	22.6526	12.6774	15.2451	13.1684	5.52737	3.92557	4.48534	4.2935	3.46823	3.7291	3.3417	A	P	P	A	A	P	P	chr5	AC008592.5	ATTCTGGGATAAAGCAAGAGGAAACTGGGTGCAGCAAAGATCCCTAGACCATTTTTCCCA	665	ENST00000503091	Ensembl	+	95210223	95197489	noncoding	intergenic
ASHG19A3L0002052	21.6688	35.8693	25.2304	50.8909	18.4053	43.665	16.2074	4.59982	5.36764	4.88387	5.52537	4.06484	5.34094	3.69149	P	P	P	A	P	P	P	chr8	lincRNA-GFRA2-3	CATAGAATTCCTTCTTGTTTCCCTGCAGAAGGCACCAAGGGTGATCTTAACAAGTCCTCA	306	AA586761	lincRNA	+	20677699	20677393	noncoding	intergenic
ASHG19A3L0000069	1844.26	1555.91	1810.15	1959.23	852.659	834.173	871.756	10.7029	10.4647	10.7398	11.0296	9.84225	9.77497	9.77171	P	P	P	P	P	P	P	chr1	lincRNA-PPP2R5A	CTGTGTGGCTTCTTGGCTGGATTCTCTGTGTGTGTGTCCCCTCTCTTCCTGATTAGTCTA	17301	chr1:212300402-212317702+	lincRNA	+	212317702	212300402	noncoding	intergenic
ASHG19A3L0000871	51.0251	51.8053	58.1464	37.5321	39.4388	24.0602	37.9779	5.81055	5.85702	6.03968	5.05863	5.20953	4.44833	5.01972	P	P	P	P	P	P	P	chr16	lincRNA-CDH11-3	AATTCCGTGCACCATTAAGCTTCAAAACCCATTCCATTCGCACTGAGCAGGTGTGGTTTT	196	AA782034	lincRNA	-	65809184	65808988	noncoding	intergenic
ASHG19A3L0000115	289.792	295.835	300.954	232.554	290.225	215.138	314.587	8.1911	8.2116	8.28607	7.80683	8.2143	7.72389	8.21605	P	P	P	P	P	P	P	chr1	lincRNA-PHC2-1	ATTCATCCGCTCTCTGCCAGGCTGCCAGGAGATAGCAGAGGAATTCCGTGCCCAGGAAAT	3360	AK292905	lincRNA	-	33896216	33790174	noncoding	exon sense-overlapping	NM_198040	PHC2	polyhomeotic-like protein 2 isoform a	-	33789223	33841194
ASHG19A3L0000115	289.792	295.835	300.954	232.554	290.225	215.138	314.587	8.1911	8.2116	8.28607	7.80683	8.2143	7.72389	8.21605	P	P	P	P	P	P	P	chr1	lincRNA-PHC2-1	ATTCATCCGCTCTCTGCCAGGCTGCCAGGAGATAGCAGAGGAATTCCGTGCCCAGGAAAT	3360	AK292905	lincRNA	-	33896216	33790174	noncoding	exon sense-overlapping	NM_004427	PHC2	polyhomeotic-like protein 2 isoform b	-	33789223	33815499
ASHG19A3L0002753	226.788	235.734	263.286	225.475	316.314	221.889	306.266	7.86636	7.91242	8.09765	7.75713	8.33993	7.775	8.17625	P	P	P	P	P	P	P	chr15	lincRNA-PSTPIP1	TTCATCTCAGAGATCTCAGTCTTTGTGCGCCGCAGGTCATCCCCTGTGCTTCCCATGCCA	207	BG977395	lincRNA	+	77271888	77271788	noncoding	intergenic
ASHG19A3L0003274	15.5923	16.3228	20.0912	27.2802	43.8132	18.7657	49.8329	4.12947	4.35384	4.57522	4.58283	5.366	4.06354	5.4279	A	A	P	P	P	P	P	chr3	lincRNA-EPHB3-2	ATTTCAGAAAATCAGCATGGCACTGTGGGTCTTTGGAGAACCTCTATAGGACGTATCTCC	6454	chr3:184390528-184396981-	lincRNA	-	184396981	184390528	noncoding	intergenic
ASHG19A3A000478	7572.56	7814.64	7777.6	3799.82	4037.83	3703.24	3872.25	12.6944	12.7497	12.7915	12.001	12.1331	11.966	11.9646	P	P	P	P	P	P	P	chr5	CTD-2340E1.3	TGTTCCTATTCGGCCATCTTGTCTCCTCCCGTGAACTGGAAATTCCCTGTCTCCCCTTAA	944	ENST00000510145	Ensembl	-	102007263	101944859	noncoding	intergenic
ASHG19A3L0001753	37.3512	25.32	37.6851	26.7862	48.859	59.1536	67.7327	5.37409	4.90276	5.44198	4.55509	5.52971	5.79171	5.88971	A	P	P	P	P	P	P	chr6	lincRNA-IGF2R	AATGTTAACTTCCATCTGGTTCTCTGTGGGCTAAGAGGAGGCACCTAGTCTAAAGAAGCT	570	R87402	lincRNA	+	160362931	160362399	noncoding	intergenic
ASHG19A3A038774	38.8378	26.5119	26.1053	92.4687	91.2506	98.3683	100.383	5.42863	4.96561	4.93561	6.42212	6.46224	6.54678	6.47224	P	P	P	P	P	P	P	chr9	AK095210	CAGGGGAAGTGTGACTGTAGCTTTAAATAGTTTAAATAGTCCTTCAAATACGGCAAATAA	2078	uc004aiu.1	UCSC_knowngene	+	74958126	74920351	noncoding	intergenic
ASHG19A3L0002221	19.4803	14.8842	13.1619	13.5645	21.4315	22.2148	22.9911	4.45294	4.23987	3.98356	3.48071	4.29847	4.32395	4.24727	A	P	A	P	P	P	A	chr9	lincRNA-RCL1	ACTATCCATAACTACCACGGTCCTTAAAATTGGGGCACGATAGCTTCCCAGGATGTACAA	688	BE545388	lincRNA	-	4872164	4871522	noncoding	intergenic
ASHG19A3A025674	18.0161	14.2694	14.9576	13.1247	30.8914	29.5817	28.5529	4.33717	4.18918	4.16848	3.43139	4.84607	4.75691	4.58317	A	P	A	P	P	P	A	chr4	AC112518.3	AAGTTGGAAATGGCTCCTCTCAAACACTGGAGATAGAGCAGCCCAAATGTATCTGCTACT	575	ENST00000436089	Ensembl	+	74580244	74576018	noncoding	intergenic
ASHG19A3L0001007	37.6857	35.6533	33.5315	30.3767	37.0653	44.5067	38.5578	5.38532	5.35953	5.27589	4.74273	5.11636	5.37126	5.04194	P	P	P	P	P	P	P	chr18	lincRNA-SALL3-2	AAGTGGCATTTTCCACAAATGGCTCCACTGACATTTCCTATTCTTTTGTATTTTGCTGTA	481	DB451083	lincRNA	+	76278269	76277624	noncoding	intergenic
ASHG19A3L0000969	204.365	46.0856	46.7998	69.6318	59.9204	52.5786	60.3435	7.72939	5.70082	5.73823	5.99259	5.84235	5.61896	5.71442	P	P	P	P	P	P	P	chr18	lincRNA-ELAC1	AATCCAGGGTCTAGAACTGTGTAGGACCTAAATCTAAAATGTACTGGGGAGGGGGTTTGT	263	BF749301	lincRNA	-	48545865	48545638	noncoding	intergenic
ASHG19A3L0001963	38.9036	15.5198	26.5198	51.2341	19.0999	36.6863	33.0803	5.43127	4.29109	4.95713	5.53567	4.12764	5.08169	4.80854	A	P	P	P	P	P	P	chr8	lincRNA-TRHR-2	TGCCTAGGAAGAACAGAGAGGAGAAGAAATATCTTGACATTTGTTCCCCACTTCTTGACG	619	BQ638596	lincRNA	-	110194971	110193209	noncoding	intergenic
ASHG19A3A042560	6624.28	6383.97	6821.26	4935.82	3571.28	4667.06	4867.65	12.511	12.4798	12.6046	12.3956	11.9434	12.3052	12.3034	P	P	P	P	P	P	P	chr10	BC043365	GAATCTGGAGAGTCCTGGGGCCTTGTTTTGAAAAAGACTTGAAATACACATAGGAAGAAA	2078	uc001iuc.2	UCSC_knowngene	-	28821460	28811613	noncoding	bidirectional	NM_100486	WAC	WW domain-containing adapter protein with coiled-coil isoform 3	+	28822423	28909923
ASHG19A3A042560	6624.28	6383.97	6821.26	4935.82	3571.28	4667.06	4867.65	12.511	12.4798	12.6046	12.3956	11.9434	12.3052	12.3034	P	P	P	P	P	P	P	chr10	BC043365	GAATCTGGAGAGTCCTGGGGCCTTGTTTTGAAAAAGACTTGAAATACACATAGGAAGAAA	2078	uc001iuc.2	UCSC_knowngene	-	28821460	28811613	noncoding	bidirectional	NM_016628	WAC	WW domain-containing adapter protein with coiled-coil isoform 1	+	28822423	28909923
ASHG19A3L0000842	23.9595	16.6255	22.3193	35.0717	17.2139	16.7321	40.2988	4.75248	4.37773	4.71463	4.95848	3.95953	3.88016	5.11006	A	P	P	P	P	P	P	chr15	lincRNA-KIAA1024-2	AGCCCAGTGGCAGCCTTCTTGACCAAGTCCTTTCAGGATGACTTGAGTCTATTAATAGTT	553	DB093487	lincRNA	-	80127622	80127069	noncoding	intergenic
ASHG19A3L0000211	17.7896	18.54	13.4877	22.9555	24.804	13.1564	21.3277	4.3186	4.51297	4.02036	4.31542	4.51	3.48629	4.12789	A	P	A	P	P	A	P	chr10	lincRNA-BTBD16	AAACTCCAAGCTGCTGTCAGTACCTGGAGAAGCCCTGGAGACAGCAGTCAGCATCCTGAG	462	BX115811	lincRNA	-	124126861	124126399	noncoding	intergenic
ASHG19A3L0002678	60.4715	62.585	60.0217	66.1908	72.9555	56.3771	81.9441	6.04532	6.10929	6.0805	5.91241	6.13019	5.72413	6.1769	P	P	P	P	P	P	P	chr8	lincRNA-PSD3-2	GATATACAGGTCCCTTGTCAACTTTTTCTATTGTCTTGTGAATCTCTTGGTTTCATATCA	554	DB131700	lincRNA	-	18903145	18902591	noncoding	intergenic
ASHG19A3A040686	17.2074	20.4688	25.7769	57.1589	57.7728	47.96	78.362	4.26497	4.63855	4.91547	5.68911	5.7882	5.4822	6.10929	A	A	P	P	P	P	P	chrX		TGCTTATTAATAGTAATCCCATACTTGCTGTAAGCCCTGCAACAACTATCATTATCCATG	956	AL079309	misc_RNA	+	13112691	13111778	noncoding	intergenic
ASHG19A3L0002617	17.7283	10.106	13.3023	45.2249	22.1782	22.8875	24.1967	4.31248	3.78551	3.99873	5.34377	4.34325	4.36946	4.32742	A	P	A	P	P	P	P	chr15	lincRNA-KLF13-1	TTCAAGAGAAAGAAAAAGTAACAAGCCAAAAGCCCCTGGGCTTCTCAGGAAACAGGCTGA	306	BX096457	lincRNA	-	31727868	31727572	noncoding	intergenic
ASHG19A3A026590	31.0996	22.3616	38.054	19.3858	22.3961	24.4647	27.8929	5.11517	4.74306	5.45537	4.05459	4.35916	4.47234	4.5443	A	P	P	P	P	P	P	chr5	CTD-2023M8.1	AAACCTTCAATTGGGAGGATACTTCTTATCTCATTTCTAGGGGCCCATCCGGGATTTCTC	238	ENST00000512978	Ensembl	-	18746282	18704541	noncoding	intergenic
ASHG19A3A027207	62.5692	12.553	21.1627	36.2556	8.93674	29.166	20.5663	6.09486	4.03683	4.643	5.00793	2.95506	4.73504	4.06803	A	P	P	P	A	P	P	chr5	CTD-2587M2.1	TCTTTCCTTCCTGAACAATTCAGTGCTAAAACCATTAGGTAGGGCAGAGCGAAGACTGTA	5471	ENST00000512693	Ensembl	-	108662070	108572820	noncoding	intergenic
ASHG19A3A035980	58080.9	55731.1	53805.6	43682.8	41424.1	43344.9	44456.8	15.5502	15.5347	15.533	15.627	15.5207	15.5847	15.5623	P	P	P	P	P	P	P	chr8	KB-1683C8.1	ATGATTGACTTTTTCCTGGGGGCCTCTCTCAAGCATGAGGTTTTGAAGATTATGCTGGTG	877	ENST00000492365	Ensembl	-	98637307	98636430	noncoding	intergenic
ASHG19A3A049576	31.6891	27.6298	36.1802	30.8814	53.7158	27.3657	58.2311	5.14337	5.02069	5.3842	4.76727	5.67239	4.63784	5.66384	P	P	P	P	P	P	P	chr13	RP11-547C18.3	ATATCGCTGCCCACACTGTGCATACTGTAGACGGCCAGTTTCGAAGGAGCACCGAGCACA	431	ENST00000433280	Ensembl	-	51685078	51659559	noncoding	intergenic
ASHG19A3A040892	50.6318	58.1802	55.9637	52.4343	68.0165	52.0651	71.6916	5.80058	6.01132	5.98492	5.56802	6.0321	5.60298	5.97246	P	P	P	P	P	P	P	chrX	RP11-245M24.1	TCCATGCCATGTGTGCCAATGGTAACCAAACCTTTCATCCTGACCATCACTAACTGGATT	639	ENST00000422047	Ensembl	+	45489447	45369728	noncoding	intergenic
ASHG19A3L0002810	81.3813	137.285	112.935	168.162	96.497	151.334	128.046	6.47517	7.18375	6.95329	7.313	6.5505	7.19339	6.8446	P	P	P	P	P	P	P	chrX	lincRNA-BCOR-7	ATTTCCATGTGGGTGTGAATCTTTTTATCATGTGCAGATGCTTCACCTCCCTTCTAATTT	4218	chrX:39487152-39491369+	lincRNA	+	39491369	39487152	noncoding	intergenic
ASHG19A3L0001558	86.0701	72.4002	88.7105	106.106	39.3635	91.9579	56.1356	6.54857	6.30832	6.625	6.62132	5.20744	6.44444	5.60934	P	P	P	P	P	P	P	chr4	lincRNA-RAP1GDS1	ATGGATAAATGCCCCAAGCTTTCTAGCCTCCCACAGGACAGTTTTAAAGCATTTGAGAGA	16301	chr4:99107102-99123402+	lincRNA	+	99123402	99107102	noncoding	intergenic
ASHG19A3A040282	18881.5	17819.2	18103.1	13731.2	11996.8	13303.8	14872.7	13.9661	13.9129	13.9794	13.9101	13.7442	13.8598	13.9549	P	P	P	P	P	P	P	chrX	RP11-111F16.1	GCAACTATGCTGCTCTCTCTTGATGGTGAAGATGAAAATGAGGGAGAAGATTATGCCGAA	1813	ENST00000432307	Ensembl	-	110864717	110862904	noncoding	intergenic
ASHG19A3L0000418	813.961	727.373	839.003	2130	1925.37	911.978	2060.65	9.57501	9.43284	9.68064	11.1584	11.043	9.91175	11.0534	P	P	P	P	P	P	P	chr11	lincRNA-CTSC	ATTAGTAGTTTTAGACATACTTCATTAACCTGCCCTCTGCCTCCAATGTGGATACACTCC	506	BE080482	lincRNA	-	88123615	88123120	noncoding	intergenic
ASHG19A3A050028	27063.6	27235.6	27736.3	25871.9	23936.2	25598.5	25032.7	14.4769	14.5191	14.5937	14.8526	14.7392	14.8109	14.706	P	P	P	P	P	P	P	chr13	EEF1DP3	ATCACCAAGTTTGAAGAGTGTATGCAGAGTGTCGACATCGCAGCTTTCAACAAGATCTGG	1367	uc001utu.2	UCSC_knowngene	+	32527609	32420919	noncoding	intergenic
ASHG19A3L0002834	55.8983	26.1994	59.2488	25.7043	31.697	55.1779	49.1784	5.94136	4.94811	6.06318	4.48991	4.88159	5.6912	5.40757	P	P	P	P	P	P	P	chrX	lincRNA-SLC25A5-1	CCACCAATTGTCCTTGAGGGTTGCAGCAGGCTCTTTACTCACATTGTATCATGTAATCTG	9864	chrX:118619272-118629135-	lincRNA	-	118629135	118619272	noncoding	intergenic
ASHG19A3L0001617	18.7294	16.3461	28.2195	23.9787	40.7348	42.6929	46.053	4.39274	4.35594	5.04211	4.38081	5.25871	5.30887	5.30914	A	P	P	P	P	P	P	chr5	lincRNA-FGF18-4	ACAAGTTACTGTCAACATGAAAATGGCCTCTGAGACATCCCAAGTGGCTTTCAGGTGTGA	310	BG001784	lincRNA	-	171288409	171288211	noncoding	intergenic
ASHG19A3L0000504	32.3776	26.315	31.003	139.948	148.186	141.049	159.166	5.17474	4.95548	5.1721	7.02913	7.19574	7.08631	7.17715	A	P	P	P	P	P	P	chr12	lincRNA-RAPGEF3	AACCACACACTAGTGGAGAATCTCATCAACTTTGAGAAGATGAGAATGATGGCCAGAGCC	2776	AK299029	lincRNA	-	48164823	48131323	noncoding	exon sense-overlapping	NM_001098531	RAPGEF3	rap guanine nucleotide exchange factor 3 isoform	-	48128452	48152889
ASHG19A3L0000504	32.3776	26.315	31.003	139.948	148.186	141.049	159.166	5.17474	4.95548	5.1721	7.02913	7.19574	7.08631	7.17715	A	P	P	P	P	P	P	chr12	lincRNA-RAPGEF3	AACCACACACTAGTGGAGAATCTCATCAACTTTGAGAAGATGAGAATGATGGCCAGAGCC	2776	AK299029	lincRNA	-	48164823	48131323	noncoding	exon sense-overlapping	NM_006105	RAPGEF3	rap guanine nucleotide exchange factor 3 isoform	-	48128452	48152244
ASHG19A3L0000504	32.3776	26.315	31.003	139.948	148.186	141.049	159.166	5.17474	4.95548	5.1721	7.02913	7.19574	7.08631	7.17715	A	P	P	P	P	P	P	chr12	lincRNA-RAPGEF3	AACCACACACTAGTGGAGAATCTCATCAACTTTGAGAAGATGAGAATGATGGCCAGAGCC	2776	AK299029	lincRNA	-	48164823	48131323	noncoding	exon sense-overlapping	NM_001098532	RAPGEF3	rap guanine nucleotide exchange factor 3 isoform	-	48128452	48152181
ASHG19A3L0002106	252.313	253.578	223.169	14.9715	6.92087	13.2372	10.3438	8.00604	8.00877	7.87099	3.64857	2.66184	3.49621	2.98614	P	P	P	A	A	A	P	chr8	lincRNA-NKAIN3	ATTAAGGCTGTGTTCGAGCCATGATCTTCCTCTGAAGAAGAAATGAAGAAGAAATTTATC	1202	AL137390	lincRNA	+	62798121	62791440	noncoding	intergenic
ASHG19A3L0001092	174.479	171.146	164.05	229.866	123.859	131.945	140.799	7.51231	7.48133	7.45868	7.79021	6.92486	6.98918	6.99351	P	P	P	P	P	P	P	chr2	lincRNA-RBM43-3	CTCCCCAGTTCCCATCAAGAATGCTATGTTTACTGGAAAGACAGAAATTTCTTAGTTTCA	12701	chr2:151609179-151621879+	lincRNA	+	151621879	151609179	noncoding	intergenic
ASHG19A3L0000178	81.8244	85.1764	95.0108	88.0673	144.283	86.4707	179.155	6.48273	6.52873	6.71731	6.35	7.15421	6.35321	7.35742	P	P	P	P	P	P	P	chr1	lincRNA-COL24A1	TAGGAGATAAGGTGTGGCATTTTTCCCTCTACTGTGACCTAAGGAAACAATTTATTTTTA	22851	chr1:86683137-86705987-	lincRNA	-	86705987	86683137	noncoding	intergenic
ASHG19A3L0002600	26.4416	26.5075	20.5145	19.0144	27.1606	17.678	27.6508	4.89593	4.96523	4.60263	4.02624	4.64796	3.96638	4.52743	P	P	P	P	P	P	P	chr12	lincRNA-PHC1	ACAGTGATAATTCTCCCAGGGAAACTAAGGAAGCACATGAGTCATGTTTCCTTAACTTTA	531	DB297852	lincRNA	+	9065498	9064970	noncoding	intergenic
ASHG19A3L0002063	102.773	81.9493	102.171	127.176	151.248	129.523	175.684	6.79771	6.47682	6.81494	6.89052	7.22566	6.9586	7.32433	P	P	P	P	P	P	P	chr8	lincRNA-NKX2-6	AAAGGTTAAAAGGGAGAATTCCTTAGCAGGGTCCTCTTGTCCGCTTTTCTTCCAAACGTC	10176	chr8:23609030-23619205-	lincRNA	-	23619205	23609030	noncoding	intergenic
ASHG19A3L0003397	39.3528	35.1872	44.9922	46.5555	57.6338	57.9808	71.3212	5.44505	5.34196	5.68709	5.38506	5.78477	5.76199	5.9653	P	P	P	P	P	P	P	chr5	lincRNA-LMNB1-1	CCTCCACATTGTTGTGGTTTTCTCTGTGTTTCCAGCATTTTTGAAAATTGACCTTGTTAA	13653	chr5:126055611-126069263+	lincRNA	+	126069263	126055611	noncoding	intergenic
ASHG19A3L0000782	239.286	217.266	234.056	190.712	323.728	372.664	409.866	7.93876	7.80553	7.93261	7.50497	8.37517	8.55222	8.61056	P	P	P	P	P	P	P	chr14	lincRNA-FLRT2-4	GAAATTATTCTTACCACGACCCTTACCTTGCTTGCTTTTGCCTCTTATGACTTTGACCAT	18726	chr14:84962047-84980772+	lincRNA	+	84980772	84962047	noncoding	intergenic
ASHG19A3L0002543	57.0909	48.2435	54.4449	38.8089	91.4716	105.857	114.705	5.96873	5.76094	5.94665	5.11234	6.46626	6.65587	6.68181	P	P	P	P	P	P	P	chr7	lincRNA-PHF14-2	CTCAAAAAGTCCTGGGCAACCCAATTCTCTGTAATGAATGAAACAAATAATAAACTTCAC	9358	chr7:11242794-11252151-	lincRNA	-	11252151	11242794	noncoding	intergenic
ASHG19A3L0000192	18.3295	10.8397	19.4895	22.574	19.924	28.0193	32.3376	4.36111	3.86274	4.53347	4.28753	4.18981	4.67388	4.77607	A	P	P	P	P	P	P	chr10	lincRNA-SMNDC1-2	TGATATAGAGTCAGGGCTGCTACATATGGTTATATTGGTCATGTCCTGTATGTGGATCCC	47401	chr10:112078410-112125810-	lincRNA	-	112125810	112078410	noncoding	intergenic
ASHG19A3L0001864	93.635	120.817	109.099	243.549	69.3252	163.696	104.438	6.66752	7.00833	6.90816	7.8793	6.06008	7.3142	6.53696	P	P	P	P	P	P	P	chr7	lincRNA-LEP-1	TTATAGCTCCCGTCACCCAAGGCTATTGCGTGTCTCTGTGTCTCTGGAAGTTAATTAAGA	15401	chr7:127748489-127763889+	lincRNA	+	127763889	127748489	noncoding	intergenic
ASHG19A3A013611	428.511	360.481	322.703	81.1109	29.5805	70.8614	38.178	8.73198	8.49252	8.37936	6.2274	4.77907	6.06872	5.02662	P	P	P	P	P	P	P	chr2	AC079807.4	ACTGGTTGAAGGAAATCCATGTTGGGCTTCTGTGGATGCTGGATTCTTTCCTTCTGAGAA	1808	ENST00000447571	Ensembl	-	48468122	48168834	noncoding	intergenic
ASHG19A3L0001648	1773.48	1728.66	1488.4	623.025	647.07	655.193	709.343	10.6449	10.607	10.4622	9.31764	9.42857	9.41384	9.46079	P	P	P	P	P	P	P	chr5	lincRNA-FYB	GCCAATGTGAAGTCTGGATTTTAATTGGCATGTTATTGGGTATCAAGAAAATTAATGCAC	2747	AK297077	lincRNA	-	39270759	39107403	noncoding	exon sense-overlapping	NM_199335	FYB	FYN-binding protein isoform 2	-	39105356	39219667
ASHG19A3L0001648	1773.48	1728.66	1488.4	623.025	647.07	655.193	709.343	10.6449	10.607	10.4622	9.31764	9.42857	9.41384	9.46079	P	P	P	P	P	P	P	chr5	lincRNA-FYB	GCCAATGTGAAGTCTGGATTTTAATTGGCATGTTATTGGGTATCAAGAAAATTAATGCAC	2747	AK297077	lincRNA	-	39270759	39107403	noncoding	exon sense-overlapping	NM_001465	FYB	FYN-binding protein isoform 1	-	39105356	39219667
ASHG19A3L0001127	68.7327	50.345	71.8174	83.2807	69.0411	58.5478	89.2071	6.23349	5.81715	6.32714	6.26612	6.0542	5.77681	6.30129	P	P	P	P	P	P	P	chr2	lincRNA-NT5C1B-2	ATTGCTTTTGGGTAATCTTCACAGGAACACATTAGCAATTTTCCCCTGGTTGGTGGGTAC	766	BU853353	lincRNA	-	19546173	19545567	noncoding	intergenic
ASHG19A3A028484	10.1305	5.0363	12.3191	20.992	26.2341	17.3632	31.1403	3.54591	2.32342	3.89825	4.17552	4.59394	3.93721	4.7157	A	A	A	P	P	P	P	chr5	RP11-72L22.1	TTTCTGAGGTGTAGGTAAGAAAGATTGAGATTCCATCCGCACGAGACAAACCCAGCAGTT	602	ENST00000503349	Ensembl	+	86433529	86263137	noncoding	intergenic
ASHG19A3L0001446	11.0566	11.2593	11.984	23.1182	24.2188	23.5833	34.9965	3.6567	3.91166	3.86089	4.32529	4.4758	4.41622	4.89611	A	A	A	P	P	P	P	chr4	lincRNA-ELOVL6	AATAAGCTTTCCAGGCATGGTAGGAAAACACCCACACAATAACTTCTAACACATTTTCCC	30026	chr4:111237276-111267301-	lincRNA	-	111267301	111237276	noncoding	intergenic
ASHG19A3L0002406	219.43	206.027	215.556	197.374	261.643	258.111	324.835	7.8217	7.73436	7.82728	7.55512	8.06377	8.00197	8.26075	P	P	P	P	P	P	P	chr1	lincRNA-ST6GALNAC3	AGCAAATTTCCAACTCCCTCTATCTTTTAAAGTTGTCTCTTCCACACCCAATTTGATTGT	7900	chr1:77167210-77175109-	lincRNA	-	77175109	77167210	noncoding	intergenic
ASHG19A3A000059	51.2762	44.0179	42.4555	18.793	17.5321	24.3759	22.2523	5.81673	5.63657	5.60487	4.00766	3.98938	4.46672	4.19537	P	P	P	P	P	P	P	chr2	AC017048.3	ACTCACCTGGTTGAAGCCATAAAGAGTTCAATATTTCAAGTGAAAATCTGCCTGTTCGAA	838	ENST00000339037	Ensembl	-	177502290	177494892	noncoding	intergenic
ASHG19A3A032101	17.5968	17.8676	22.0226	13.2086	17.6936	22.0925	29.4557	4.30079	4.46773	4.69576	3.44293	4.00409	4.31641	4.63264	A	P	P	P	P	P	A	chr6	RP11-557H15.2	TTTAACACTTCTAACTCAGGCACCCAAACCAGCCTGTAGCAGAAAGAGCATCAAAGCCAT	1445	ENST00000440090	Ensembl	+	134825157	134786114	noncoding	intergenic
ASHG19A3L0002712	23.8834	20.3969	21.7563	46.577	52.3827	65.7642	63.7435	4.74807	4.63303	4.67975	5.38591	5.63448	5.9565	5.80049	A	P	P	P	P	P	P	chr16	lincRNA-KLHDC4	TGCTATGTCTGCACCAAAGTCCCTGCTTAAAACTTTGGAACAAGAATGTAGCTTCAACGG	1172	BM909110	lincRNA	-	87840082	87813676	noncoding	intergenic
ASHG19A3L0000156	39.6433	33.8447	40.2985	30.2203	24.7146	30.212	29.664	5.45398	5.28794	5.53298	4.7354	4.505	4.79068	4.64309	P	P	P	P	P	P	P	chr1	lincRNA-CDCP2	AGGTGTGGGGGGTAACATTAGATCCACAGGCACATATGCAAACACACCCAGGCACACCCG	715	exon99+	lincRNA	+	54588155	54587441	noncoding
ASHG19A3L0001778	207.723	90.1958	76.8433	243.166	78.9652	168.501	104.526	7.74843	6.60927	6.42094	7.87659	6.25106	7.35536	6.53879	P	P	P	P	P	P	P	chr6	lincRNA-WRNIP1	TAACATCTTCATTGTTGTTTACTGTTGCCCTAACACCCTCCAATCAACCATTCATCGATG	518	AW167909	lincRNA	-	2812980	2812462	noncoding	intergenic
ASHG19A3L0003541	7.32274	11.0314	15.2774	41.8596	19.5844	31.4347	23.8745	3.10709	3.88557	4.19865	5.22345	4.16162	4.84675	4.30784	A	A	A	P	P	P	P	chr20	lincRNA-CBFA2T2	CAAATACTTCCCTTTTTCAGACAACACTTTACTCTTCAATGTATCAAGAGCTTCTTCTCA	20133	chr20:32034169-32054301+	lincRNA	+	32054301	32034169	noncoding	intergenic
ASHG19A3A029461	24.7692	44.7028	58.6627	144.495	74.5191	124.803	66.039	4.79906	5.65907	6.05034	7.0796	6.16444	6.90508	5.85182	P	P	P	P	P	P	P	chr6	RP3-471C18.2	GAATATCCTCTAAAAGGCAGCTAAGCACTCGCTGTCTTCTTCCTTTTGCCTCATCAAGCA	191	ENST00000450310	Ensembl	-	19753344	19690055	noncoding	intergenic
ASHG19A3L0002478	28.6815	5.39904	29.4902	46.8567	32.59	30.057	14.8772	5.00633	2.35961	5.10338	5.39489	4.92414	4.78298	3.55001	A	P	P	A	P	P	P	chr1	lincRNA-PDPN	GCTTTTAATAGACCAGTGGAAAACTAAACGTCGCACCTTATTCCTTGTCCTGAGATGCCG	2329	chr1:13902316-13904644+	lincRNA	+	13904644	13902316	noncoding	intergenic
ASHG19A3A052888	254.878	254.583	246.069	153.423	123.742	144.805	161.405	8.02234	8.01349	8.00284	7.16869	6.92283	7.12707	7.19831	P	P	P	P	P	P	P	chr15	LOC100129387	AGGGAAAGAAAATATGCCATTTCTAGCGCTTCAGCCACACAAAGAAAGCGGCGGAATGAT	4139	NR_024490	RefSeq_NR	+	50650501	50646370	noncoding	natural antisense	NM_005254	GABPB1	GA-binding protein subunit beta-1 isoform beta	-	50569388	50647605
ASHG19A3A052888	254.878	254.583	246.069	153.423	123.742	144.805	161.405	8.02234	8.01349	8.00284	7.16869	6.92283	7.12707	7.19831	P	P	P	P	P	P	P	chr15	LOC100129387	AGGGAAAGAAAATATGCCATTTCTAGCGCTTCAGCCACACAAAGAAAGCGGCGGAATGAT	4139	NR_024490	RefSeq_NR	+	50650501	50646370	noncoding	natural antisense	NM_016654	GABPB1	GA-binding protein subunit beta-1 isoform beta	-	50569388	50647605
ASHG19A3A052888	254.878	254.583	246.069	153.423	123.742	144.805	161.405	8.02234	8.01349	8.00284	7.16869	6.92283	7.12707	7.19831	P	P	P	P	P	P	P	chr15	LOC100129387	AGGGAAAGAAAATATGCCATTTCTAGCGCTTCAGCCACACAAAGAAAGCGGCGGAATGAT	4139	NR_024490	RefSeq_NR	+	50650501	50646370	noncoding	natural antisense	NM_002041	GABPB1	GA-binding protein subunit beta-1 isoform gamma	-	50578076	50647605
ASHG19A3A052888	254.878	254.583	246.069	153.423	123.742	144.805	161.405	8.02234	8.01349	8.00284	7.16869	6.92283	7.12707	7.19831	P	P	P	P	P	P	P	chr15	LOC100129387	AGGGAAAGAAAATATGCCATTTCTAGCGCTTCAGCCACACAAAGAAAGCGGCGGAATGAT	4139	NR_024490	RefSeq_NR	+	50650501	50646370	noncoding	natural antisense	NM_016655	GABPB1	GA-binding protein subunit beta-1 isoform gamma	-	50578076	50647605
ASHG19A3A052888	254.878	254.583	246.069	153.423	123.742	144.805	161.405	8.02234	8.01349	8.00284	7.16869	6.92283	7.12707	7.19831	P	P	P	P	P	P	P	chr15	LOC100129387	AGGGAAAGAAAATATGCCATTTCTAGCGCTTCAGCCACACAAAGAAAGCGGCGGAATGAT	4139	NR_024490	RefSeq_NR	+	50650501	50646370	noncoding	natural antisense	NM_181427	GABPB1	GA-binding protein subunit beta-1 isoform gamma	-	50578076	50647605
ASHG19A3A023482	13.0794	9.69661	12.878	24.2349	29.5343	29.9451	41.1245	3.88841	3.73802	3.95855	4.39676	4.77662	4.77711	5.14254	A	A	A	P	P	P	P	chr3	RP11-10O22.1	TTTGTGCTGATGTGGTGATGCATGGGATGTTACAGAGCCAGCCACAGAAATAATTGACAG	1834	ENST00000490357	Ensembl	+	162949937	162744183	noncoding	intergenic
ASHG19A3A050380	41.1437	41.9878	54.7448	53.6758	65.2937	67.0793	66.9221	5.50447	5.57605	5.95383	5.59952	5.96981	5.98564	5.8724	P	P	P	P	P	P	P	chr13		ATTTGCACATCCATAAGTAATATGTAACGGTGGCAATGAATGGCTGGCTGGGGTGGGATA	1164	AY927632	RNAdb	+	92013008	92011845	noncoding	intergenic
ASHG19A3L0002311	12.3851	12.8837	21.5307	14.8911	16.1278	19.8574	17.1482	3.80837	4.06919	4.66413	3.64093	3.85683	4.14805	3.78431	A	A	P	P	P	P	P	chrX	lincRNA-ZNF81-2	ACTCAACGGGGACTGCTGGGGTCAGAAGGAAGATCCTGCAGCTTTCACTGTGAGATCTGG	456	AA933086	lincRNA	-	47861957	47705518	noncoding	intron sense-overlapping	NM_001007088	ZNF182	zinc finger protein 182 isoform 2	-	47834249	47863377
ASHG19A3L0002311	12.3851	12.8837	21.5307	14.8911	16.1278	19.8574	17.1482	3.80837	4.06919	4.66413	3.64093	3.85683	4.14805	3.78431	A	A	P	P	P	P	P	chrX	lincRNA-ZNF81-2	ACTCAACGGGGACTGCTGGGGTCAGAAGGAAGATCCTGCAGCTTTCACTGTGAGATCTGG	456	AA933086	lincRNA	-	47861957	47705518	noncoding	intron sense-overlapping	NM_006962	ZNF182	zinc finger protein 182 isoform 1	-	47834249	47863377
ASHG19A3L0002311	12.3851	12.8837	21.5307	14.8911	16.1278	19.8574	17.1482	3.80837	4.06919	4.66413	3.64093	3.85683	4.14805	3.78431	A	A	P	P	P	P	P	chrX	lincRNA-ZNF81-2	ACTCAACGGGGACTGCTGGGGTCAGAAGGAAGATCCTGCAGCTTTCACTGTGAGATCTGG	456	AA933086	lincRNA	-	47861957	47705518	noncoding	natural antisense	NM_007137	ZNF81	zinc finger protein 81	+	47696300	47781655
ASHG19A3L0002311	12.3851	12.8837	21.5307	14.8911	16.1278	19.8574	17.1482	3.80837	4.06919	4.66413	3.64093	3.85683	4.14805	3.78431	A	A	P	P	P	P	P	chrX	lincRNA-ZNF81-2	ACTCAACGGGGACTGCTGGGGTCAGAAGGAAGATCCTGCAGCTTTCACTGTGAGATCTGG	456	AA933086	lincRNA	-	47861957	47705518	noncoding	intron sense-overlapping	NM_001178099	ZNF182	zinc finger protein 182 isoform 1	-	47834249	47863394
ASHG19A3L0001021	32.8551	50.8494	45.4954	96.4839	44.3118	81.3642	40.5392	5.19424	5.83177	5.7023	6.48296	5.38453	6.26255	5.12097	P	P	P	P	P	P	P	chr2	lincRNA-NPAS2-2	TTCAAGTGTGAACTCAGTTTATCTCCTGTTTCCTCCAATAGCAAGGCGCTTGCTCTTGTG	421	AW661739	lincRNA	+	101306647	101306225	noncoding	intergenic
ASHG19A3L0001749	47.0117	46.4213	42.2227	53.2565	49.5404	65.7731	15.5913	5.69638	5.71104	5.59656	5.58987	5.55108	5.95688	3.62838	P	P	P	A	P	P	P	chr6	lincRNA-TFB1M	AAGGAAGAACGTTGCTTTTCAAAGACCTGCTGTGTGATGCATGCCTGAGTCAATGAGACA	21051	chr6:155661283-155682333-	lincRNA	-	155682333	155661283	noncoding	intergenic
[truncated: 2,941 more rows]
