# Supplementary material for: Long Noncoding RNA Expression Signatures of Metastatic Nasopharyngeal Carcinoma and Their Prognostic Value
Source: Biomed Res Int. 2015 Sep 13;2015:618924. doi: 10.1155/2015/618924 (PMC4584063; doi:10.1155/2015/618924)
Supplement: Supplementary file 1 — Table S01. The clinical information corresponding to the seven NPC patient samples used for microarray analysis. Table S02. Four different lncRNA members (LOC84740, ENST00000498296, AL359062, and ENST00000438550) were selected to verify their expression levels via QPCR. This table supply the primer sequences used for Real-time PCR of the four lncRNAs. Table S03. lncRNA Expression Profiling Data. A total of 33,045 lncRNA probes were used in our lncRNA microarray. Up to 30,610 lncRNAs were detected in all seven samples. Table S04. Differentially Expressed lncRNAs. A total of 8,088 lncRNAs were identified to be significantly differentially expressed(≥2-fold) between the metastatic and primary NPC tumors in the microarray. Among these, 3,778 lncRNAs were found to be consistently upregulated; 4,310 lncRNAs were downregulated. Table S05. HOX cluster profiling. In this study, we detected the transcripts in HOX loci, 477 transcribed regions were found. Among them, 257 were ncRNAs and 220 were HOX coding transcripts. Table S06. Differentially expressed IncRNAs at HOX locus. In the four randomly paired groups, the number of differentially expressed lncRNAs differed, but several lncRNAs displayed similar changes in expression. Compared with the NPC primary tumors, 70 lncRNAs were found to be differentially expressed in metastatic tissues; 51 coding transcripts were differentially expressed. Table S07. Rinn lincRNA expression profiles. A total of 4,199 Rinn lincRNAs were detected in this microarray analysis. Table S08. Differentially expressed Rinn lincRNAs. A total of 1,069 Rinn lincRNAs were found to be differentially expressed. Table S09. Enhancer lncRNAs profiles. A total of 1,598 enhancer lncRNAs were detected, of which 468 lncRNAs were differentially expressed. Table S10. Data for enhancer lncRNAs regulating a nearby coding gene. The differentially expressed enhancer lncRNAs and their nearby coding genes (distance < 300 kb) were presented. Table S11. Data for lincRNAs reg [file 618924.f1.zip › S08 Differentially expressed Rinn lincRNAs.xls]

## Sheet: M vs T
# Fold-Change cut-off: 2.0 # P-value cut-off: 0.05 # Condition pairs: M vs T This table contains profiling data of all probes for lincRNAs based on John Rinn's papers (Guttman, M., et al. 2009, Khalil, A.M., et al. 2009). # Column A: ProbeName, it represents the probe name. # Column B: P, P-value, P-value calculated from paired t-test. # Column C: FC (abs), Absolute Fold Change, the absolute rati…
		Fold change and Regulation		Raw Intensity							Normalized Intensity							Annotations																Group--Raw Intensity		Group--Normalized Intensity
ProbeName	p -value	FC (abs)	Regulation	[M1](raw)	[M2](raw)	[M3](raw)	[T1](raw)	[T2](raw)	[T3](raw)	[T4](raw)	[M1](normalized)	[M2](normalized)	[M3](normalized)	[T4](normalized)	[T3](normalized)	[T2](normalized)	[T1](normalized)	type	seqname	GeneSymbol	source	RNAlength	chrom	strand	txStart	txEnd	Xhyb	probeSeq	EntrezID	unigene	GO	ProteinAccession	product	M(raw)	T(raw)	M(normalized)	T(normalized)
ASHG19A3L0003536	0.0160165	12.4073	up	649.912	598.284	409.352	41.2014	85.2099	13.9239	104.163	9.2822	9.16177	8.71119	6.53242	3.57864	5.20015	6.36322	noncoding	BE244504	lincRNA-FAM110A	lincRNA	447	chr20	-	837118	837565	GTGCTGTGTGTGTGGAAACCCAAATATGACCGTAGAGGGTGGAGCCACAAAACCAAGCTG	intergenic							61.1245	9.05172	5.41861
ASHG19A3A027940	0.00085086	4.83869	up	142.038	155.418	127.342	42.6469	34.4703	34.3462	28.9464	7.23384	7.35334	7.11744	4.60472	4.97906	5.24947	5.00779	noncoding	ENST00000508179	CTD-2001E22.2	Ensembl	1799	chr5	+	9546311	9550721	CCAGGGTGTTATTTTCCGACATTGAGTCTTGTATATATCTTGAATGTCTATAAGCAAAGA	bidirectional	NM_003966	SEMA5A	semaphorin-5A precursor	-	9035137	9546233	35.1024	7.23488	4.96026
ASHG19A3A034290	0.00100492	2.04781	up	85.1023	75.9987	73.8993	43.8104	46.3542	48.6409	46.2118	6.53377	6.37441	6.36936	5.31593	5.50285	5.29482	5.45347	noncoding	ENST00000436056	AC073115.7	Ensembl	532	chr7	+	46030503	46040497	CCTAAAAAATGGAAGCACAAACTGTACAACAAATACTCTCCATTCAAGTTGAAGTTCTCA	intergenic							46.2543	6.42585	5.39177
ASHG19A3L0000453	0.000493128	4.83674	up	101.307	113.386	91.0896	29.3367	19.1998	24.8327	31.2721	6.77641	6.92189	6.65561	4.72303	4.49387	4.69021	4.13529	noncoding	BC007632	lincRNA-RIMBP2-1	lincRNA	3902	chr12	-	130916193	131200826	AGAGATGACTTTTCTAGAGAAGAGTAGAAACACAGCGGCAGAAACACAGCTCTGCACTTC	exon sense-overlapping	NM_015347	RIMBP2	RIMS-binding protein 2	-	130880680	131002410	26.1603	6.78463	4.5106
ASHG19A3A048668	0.0415217	2.50819	up	95.3311	107.176	92.8452	74.7952	26.3917	73.2778	33.6377	6.69221	6.84557	6.68234	4.83362	6.11654	6.09886	4.60455	noncoding	AK022887		RNAdb	2629	chr12	+	54513394	54516023	AAAGACCACCCTTTTGTCCATCTTCTTCACATGGGTGGATGTGAGAAAAGTTTCTCTCCC	intergenic							52.0256	6.74004	5.41339
ASHG19A3L0002225	5.37487e-05	2.69876	up	34039.9	37670.6	32418.2	9515.4	9974.34	10194.6	10660.8	14.8027	14.9871	14.8201	13.4545	13.4635	13.3719	13.4609	noncoding	BC036853	lincRNA-PDCD1LG2-2	lincRNA	1660	chr9	-	5357968	5630071	GGAGGTGCTCTAAATAACTTTTAGATTTCCTCTCTCTGTGTGCATTACCAATATCTAAGT	exon sense-overlapping	NM_018465	C9orf46	transmembrane protein C9orf46	-	5357966	5437937	10086.3	14.87	13.4377
ASHG19A3L0002225	5.37487e-05	2.69876	up	34039.9	37670.6	32418.2	9515.4	9974.34	10194.6	10660.8	14.8027	14.9871	14.8201	13.4545	13.4635	13.3719	13.4609	noncoding	BC036853	lincRNA-PDCD1LG2-2	lincRNA	1660	chr9	-	5357968	5630071	GGAGGTGCTCTAAATAACTTTTAGATTTCCTCTCTCTGTGTGCATTACCAATATCTAAGT	intronic antisense	NM_025239	PDCD1LG2	programmed cell death 1 ligand 2 precursor	+	5510544	5571282	10086.3	14.87	13.4377
ASHG19A3L0002225	5.37487e-05	2.69876	up	34039.9	37670.6	32418.2	9515.4	9974.34	10194.6	10660.8	14.8027	14.9871	14.8201	13.4545	13.4635	13.3719	13.4609	noncoding	BC036853	lincRNA-PDCD1LG2-2	lincRNA	1660	chr9	-	5357968	5630071	GGAGGTGCTCTAAATAACTTTTAGATTTCCTCTCTCTGTGTGCATTACCAATATCTAAGT	intronic antisense	NM_001135920	KIAA1432	protein RIC1 homolog isoform b	+	5629118	5769454	10086.3	14.87	13.4377
ASHG19A3L0002225	5.37487e-05	2.69876	up	34039.9	37670.6	32418.2	9515.4	9974.34	10194.6	10660.8	14.8027	14.9871	14.8201	13.4545	13.4635	13.3719	13.4609	noncoding	BC036853	lincRNA-PDCD1LG2-2	lincRNA	1660	chr9	-	5357968	5630071	GGAGGTGCTCTAAATAACTTTTAGATTTCCTCTCTCTGTGTGCATTACCAATATCTAAGT	intronic antisense	NM_001206557	KIAA1432	protein RIC1 homolog isoform c	+	5629118	5776556	10086.3	14.87	13.4377
ASHG19A3L0002225	5.37487e-05	2.69876	up	34039.9	37670.6	32418.2	9515.4	9974.34	10194.6	10660.8	14.8027	14.9871	14.8201	13.4545	13.4635	13.3719	13.4609	noncoding	BC036853	lincRNA-PDCD1LG2-2	lincRNA	1660	chr9	-	5357968	5630071	GGAGGTGCTCTAAATAACTTTTAGATTTCCTCTCTCTGTGTGCATTACCAATATCTAAGT	intronic antisense	NM_020829	KIAA1432	protein RIC1 homolog isoform a	+	5629118	5776556	10086.3	14.87	13.4377
ASHG19A3L0002225	5.37487e-05	2.69876	up	34039.9	37670.6	32418.2	9515.4	9974.34	10194.6	10660.8	14.8027	14.9871	14.8201	13.4545	13.4635	13.3719	13.4609	noncoding	BC036853	lincRNA-PDCD1LG2-2	lincRNA	1660	chr9	-	5357968	5630071	GGAGGTGCTCTAAATAACTTTTAGATTTCCTCTCTCTGTGTGCATTACCAATATCTAAGT	intronic antisense	NM_014143	CD274	programmed cell death 1 ligand 1 precursor	+	5450502	5470567	10086.3	14.87	13.4377
ASHG19A3A026163	0.000596694	2.34421	up	935.894	1097.56	850.2	384.976	354.63	375.031	435.969	9.76947	9.97993	9.69627	8.70542	8.5598	8.57315	8.5061	noncoding	BC034819		NRED	2882	chr4	+	153457444	153460292	GTGGCTTTTACTGTCAAAGATTGTGTAAGCTAAATTATCTGGCAAAATTTTGCTTTCCAG	intergenic							387.651	9.81522	8.58612
ASHG19A3L0001219	0.00363817	3.50979	up	138.214	125.688	102.2	50.2845	32.0891	49.2731	35.585	7.19501	7.06299	6.81545	4.92357	5.52279	5.50546	4.90057	noncoding	BX101700	lincRNA-TACR1-1	lincRNA	720	chr2	-	75555040	75555760	AAATGAATAGCTGATACTCCTCCTTCATCAGAGAACTTGTGAGGCAGAAAGCGGGGAAAG	intergenic							41.8079	7.02448	5.2131
ASHG19A3A008475	0.000956915	2.02708	up	3516.13	3351.18	2962.69	1432.42	1349.82	1379.81	1327.75	11.6127	11.5571	11.4392	10.415	10.5373	10.5861	10.5293	noncoding	uc010wkl.1	DQ589083	UCSC_knowngene	1661	chr17	-	45126240	45127901	AACTCTGCTTAGGATTATTTCATTGATCCCCAGGGTCCAATTGCCCAGTGCTCAGTCAAA	intergenic							1372.45	11.5363	10.5169
ASHG19A3A014203	0.00888553	2.63529	up	1553.31	1418.42	1465.85	384.213	624.352	385.229	727.969	10.4555	10.3368	10.4334	9.49448	8.60129	8.57004	9.37648	noncoding	NR_015395	LOC541471	RefSeq_NR	809	chr2	-	112124590	112252692	TTATAAATCTTCAATACATCCTGTCCCCCTAAAACGGCATCTGGGTCTTTTGAGGGTTAA	intergenic							530.441	10.4085	9.01057
ASHG19A3L0001531	0.000471954	5.41081	up	1275.03	1523.06	1277.14	181.956	234.7	258.938	287.957	10.188	10.4382	10.2449	8.08364	8.00739	7.43677	7.89029	noncoding	DN920247	lincRNA-SCARB2	lincRNA	527	chr4	-	77102106	77155656	GCCTATGTTTTTGAACAAGACCAATCTGTTGGAGACCCTAAAATTGACTTAAATAGAACA	exon sense-overlapping	NM_001204255	SCARB2	lysosome membrane protein 2 isoform 2	-	77079891	77135052	240.888	10.2904	7.85452
ASHG19A3L0001531	0.000471954	5.41081	up	1275.03	1523.06	1277.14	181.956	234.7	258.938	287.957	10.188	10.4382	10.2449	8.08364	8.00739	7.43677	7.89029	noncoding	DN920247	lincRNA-SCARB2	lincRNA	527	chr4	-	77102106	77155656	GCCTATGTTTTTGAACAAGACCAATCTGTTGGAGACCCTAAAATTGACTTAAATAGAACA	exon sense-overlapping	NM_005506	SCARB2	lysosome membrane protein 2 isoform 1	-	77079891	77135052	240.888	10.2904	7.85452
ASHG19A3A040875	0.0330576	2.9023	up	26.5082	23.0105	38.8694	9.79014	10.9341	13.8925	23.2811	4.89967	4.78074	5.48467	4.26926	3.57558	2.9979	3.22859	noncoding	ENST00000411879	RP1-154K9.2	Ensembl	895	chrX	+	42111711	42558542	CCTTGGAGCAGAAAGTGAAAGTGTTCTGGAGCCAAAAGTAGTAACAAAGATGGAGGGCAA	intergenic							14.4745	5.05503	3.51783
ASHG19A3L0002482	0.0293733	2.861	up	38.3468	26.6382	25.8477	22.8104	15.8149	9.87681	11.6556	5.40931	4.97336	4.92062	3.1551	3.05468	4.30366	3.82485	noncoding	AI432427	lincRNA-CA6	lincRNA	619	chr1	+	8906748	9229411	AATGGGTGGTGCCGCAGGAGAACTCATCTCAGTGGATTCTGCATTTGAATATGGAATACA	intron sense-overlapping	NM_001215	CA6	carbonic anhydrase 6 precursor	+	9005921	9035148	15.0394	5.1011	3.58457
ASHG19A3L0002482	0.0293733	2.861	up	38.3468	26.6382	25.8477	22.8104	15.8149	9.87681	11.6556	5.40931	4.97336	4.92062	3.1551	3.05468	4.30366	3.82485	noncoding	AI432427	lincRNA-CA6	lincRNA	619	chr1	+	8906748	9229411	AATGGGTGGTGCCGCAGGAGAACTCATCTCAGTGGATTCTGCATTTGAATATGGAATACA	intronic antisense	NM_024980	GPR157	probable G-protein coupled receptor 157	-	9164475	9189229	15.0394	5.1011	3.58457
ASHG19A3L0002482	0.0293733	2.861	up	38.3468	26.6382	25.8477	22.8104	15.8149	9.87681	11.6556	5.40931	4.97336	4.92062	3.1551	3.05468	4.30366	3.82485	noncoding	AI432427	lincRNA-CA6	lincRNA	619	chr1	+	8906748	9229411	AATGGGTGGTGCCGCAGGAGAACTCATCTCAGTGGATTCTGCATTTGAATATGGAATACA	intronic antisense	NM_207420	SLC2A7	solute carrier family 2, facilitated glucose	-	9063358	9086404	15.0394	5.1011	3.58457
ASHG19A3L0002482	0.0293733	2.861	up	38.3468	26.6382	25.8477	22.8104	15.8149	9.87681	11.6556	5.40931	4.97336	4.92062	3.1551	3.05468	4.30366	3.82485	noncoding	AI432427	lincRNA-CA6	lincRNA	619	chr1	+	8906748	9229411	AATGGGTGGTGCCGCAGGAGAACTCATCTCAGTGGATTCTGCATTTGAATATGGAATACA	intronic antisense	NM_001201483	ENO1	c-myc promoter-binding protein-1 isoform MBP-1	-	8921058	8931635	15.0394	5.1011	3.58457
ASHG19A3L0002482	0.0293733	2.861	up	38.3468	26.6382	25.8477	22.8104	15.8149	9.87681	11.6556	5.40931	4.97336	4.92062	3.1551	3.05468	4.30366	3.82485	noncoding	AI432427	lincRNA-CA6	lincRNA	619	chr1	+	8906748	9229411	AATGGGTGGTGCCGCAGGAGAACTCATCTCAGTGGATTCTGCATTTGAATATGGAATACA	intronic antisense	NM_001428	ENO1	alpha-enolase isoform 1	-	8921058	8939151	15.0394	5.1011	3.58457
ASHG19A3L0002482	0.0293733	2.861	up	38.3468	26.6382	25.8477	22.8104	15.8149	9.87681	11.6556	5.40931	4.97336	4.92062	3.1551	3.05468	4.30366	3.82485	noncoding	AI432427	lincRNA-CA6	lincRNA	619	chr1	+	8906748	9229411	AATGGGTGGTGCCGCAGGAGAACTCATCTCAGTGGATTCTGCATTTGAATATGGAATACA	intronic antisense	NM_001135585	SLC2A5	solute carrier family 2, facilitated glucose	-	9101426	9129887	15.0394	5.1011	3.58457
ASHG19A3L0002482	0.0293733	2.861	up	38.3468	26.6382	25.8477	22.8104	15.8149	9.87681	11.6556	5.40931	4.97336	4.92062	3.1551	3.05468	4.30366	3.82485	noncoding	AI432427	lincRNA-CA6	lincRNA	619	chr1	+	8906748	9229411	AATGGGTGGTGCCGCAGGAGAACTCATCTCAGTGGATTCTGCATTTGAATATGGAATACA	intronic antisense	NM_003039	SLC2A5	solute carrier family 2, facilitated glucose	-	9097004	9129887	15.0394	5.1011	3.58457
ASHG19A3A043894	3.48283e-05	6.47128	up	915.731	874.03	882.262	134.629	129.456	150.882	136.819	9.73386	9.68548	9.74414	6.95307	7.18822	6.97413	6.99304	noncoding	ENST00000399501	RP11-292F22.3	Ensembl	1273	chr10	+	47594378	47595651	TATGTAACACTGGACACTTTGAGGTGGAGATCAATGTCAAGTGGCTCAGTGAGAACCCTT	intergenic							137.947	9.72116	7.02711
ASHG19A3A022462	0.000385898	4.15385	up	90.0564	70.9361	74.4801	21.7056	27.6833	19.7469	25.8452	6.60885	6.28178	6.3797	4.42933	4.14203	4.22513	4.6795	noncoding	ENST00000426017	RP11-191G24.1	Ensembl	362	chr1	+	51984054	52027301	CAGCAGAAGCAGCGTAAAGTATTGGAACTTTGAATCTGACATCAGAAAGACCTGCACTCA	intronic antisense	NM_001981	EPS15	epidermal growth factor receptor substrate 15	-	51819934	51984995	23.7453	6.42344	4.369
ASHG19A3L0000765	0.0413458	2.32489	up	4278.83	4584.42	3857.77	2887.68	1362.99	1091.39	1336.2	11.8972	12.0162	11.813	10.4241	10.194	11.6033	10.5452	noncoding	AI734132	lincRNA-RGS6-1	lincRNA	438	chr14	-	73058669	73059107	ATTCATCTTTGTCTTGGACATTTTGGATGACTCTCCCCTCCTGGGACTAGAGACAAACTG	intergenic							1669.56	11.9088	10.6916
ASHG19A3A041679	2.27554e-05	2.0325	up	511.224	506.045	509.498	264.645	250.092	236.852	252.566	8.95734	8.93989	8.99235	7.88528	7.87363	8.00616	7.99467	noncoding	U66048		NRED	2959	chrX	+	149128983	149131935	AAGAAGTGTACTCACACTGCCCCAACACCAGTGAGTGGAAATATTTATAGGTCTCTCATT	intergenic							251.039	8.96319	7.93994
ASHG19A3L0000050	0.00394554	2.56252	up	156.479	156.697	122.586	70.3114	69.2784	56.0553	65.6996	7.36227	7.36294	7.06509	5.84428	5.71394	6.00619	6.05907	noncoding	BG679513	lincRNA-KCNT2-2	lincRNA	868	chr1	+	193254821	193255677	GTTGATGGTGTTGAACTTTAATCTCAGGATTAATAACTGTTAAATAGAAGCGTGGCATGA	intergenic							65.3362	7.26343	5.90587
ASHG19A3A049666	0.00327334	3.32159	up	54.9498	19.6402	29.4915	14.7846	14.9698	5	22.0585	5.9167	4.58399	5.10349	4.18279	2.32995	3.62765	3.73769	noncoding	ENST00000413857	RP11-512C24.1	Ensembl	481	chr13	-	74951299	74952088	AGCGAATTAATATACATGTTCAGCATTTTAAGCACTTGAAGAGCCAAGATAGCATCCTGA	intergenic							14.2032	5.20139	3.46952
ASHG19A3A007145	0.000545669	3.17654	up	45.3291	34.2534	40.6376	17.5884	18.5251	14.67	16.0421	5.64737	5.30385	5.54445	3.67452	3.66931	3.9034	4.07716	noncoding	NR_033358	MEG3	RefSeq_NR	1735	chr14	+	101292444	101327358	ACTCCGTGGAAGCACGCTCACAAAGGGCTAATCTCGGGCCTTGTCGAAGGAAGAGGCTGC	intergenic							16.7064	5.49856	3.8311
ASHG19A3L0002508	2.60928e-05	4.7918	up	787.949	950.664	799.697	161.78	169.495	182.846	185.303	9.53368	9.79194	9.60995	7.40661	7.47894	7.25463	7.39831	noncoding	CN413083	lincRNA-UFC1	lincRNA	687	chr1	+	161106389	161107075	TTTTGTAAAACCTCCCAGGATGATAGTAAGAGTTGGCACAAAAAGAGGTTAATAGGTGCT	intergenic							174.856	9.64519	7.38462
ASHG19A3A018664	0.00103092	3.31324	up	160.715	169.246	151.657	59.6131	54.1919	44.2567	68.5204	7.40139	7.46448	7.35674	5.90968	5.36157	5.757	5.68893	noncoding	AK057475		misc_RNA	2087	chr21	-	19301407	19303493	GCCAAAGACATTACTTTGAGGCATGAAAATATCCTGTGTCTGTTTCTGCAATATATGTTT	intronic antisense	NM_001204177	CHODL	chondrolectin isoform d	+	19289656	19639687	56.6455	7.40754	5.67929
ASHG19A3A018664	0.00103092	3.31324	up	160.715	169.246	151.657	59.6131	54.1919	44.2567	68.5204	7.40139	7.46448	7.35674	5.90968	5.36157	5.757	5.68893	noncoding	AK057475		misc_RNA	2087	chr21	-	19301407	19303493	GCCAAAGACATTACTTTGAGGCATGAAAATATCCTGTGTCTGTTTCTGCAATATATGTTT	intronic antisense	NM_001204175	CHODL	chondrolectin isoform c	+	19289656	19639687	56.6455	7.40754	5.67929
ASHG19A3A018664	0.00103092	3.31324	up	160.715	169.246	151.657	59.6131	54.1919	44.2567	68.5204	7.40139	7.46448	7.35674	5.90968	5.36157	5.757	5.68893	noncoding	AK057475		misc_RNA	2087	chr21	-	19301407	19303493	GCCAAAGACATTACTTTGAGGCATGAAAATATCCTGTGTCTGTTTCTGCAATATATGTTT	intronic antisense	NM_001204178	CHODL	chondrolectin isoform d	+	19289656	19639687	56.6455	7.40754	5.67929
ASHG19A3A018664	0.00103092	3.31324	up	160.715	169.246	151.657	59.6131	54.1919	44.2567	68.5204	7.40139	7.46448	7.35674	5.90968	5.36157	5.757	5.68893	noncoding	AK057475		misc_RNA	2087	chr21	-	19301407	19303493	GCCAAAGACATTACTTTGAGGCATGAAAATATCCTGTGTCTGTTTCTGCAATATATGTTT	intronic antisense	NM_001204176	CHODL	chondrolectin isoform c	+	19289656	19639687	56.6455	7.40754	5.67929
ASHG19A3L0000465	1.4151e-06	2.91348	up	2048.58	1889.15	1907.95	614.39	572.396	577.189	638.355	10.859	10.7494	10.8146	9.29793	9.22564	9.29477	9.24151	noncoding	CR623725	lincRNA-ST8SIA1	lincRNA	2345	chr12	-	22477345	22589990	ATAGCTGAGCATAGGAAATTAAAAAGCCTCTTTAAAGATCTGTACTGTCTTGAGGTTGAT	intron sense-overlapping	NM_003034	ST8SIA1	alpha-N-acetylneuraminide	-	22346324	22487648	600.582	10.8077	9.26496
ASHG19A3A007192	0.000483845	3.19581	up	302.258	309.143	303.048	91.9029	108.511	92.5979	124.271	8.25303	8.27497	8.29702	6.80214	6.45624	6.41339	6.72353	noncoding	NR_015442	LOC401397	RefSeq_NR	1055	chr7	-	112756773	112758637	GCCATTCCTGTAATGGCTGCTTCCTAGAAGGTCGTGTCACGTGGAACCTCTTAATCTCAG	intergenic							104.321	8.27501	6.59883
ASHG19A3L0003507	2.07162e-05	2.14678	up	658.243	676.247	633.177	299.958	281.089	290.906	325.411	9.29763	9.33133	9.29319	8.26346	8.19061	8.19519	8.17157	noncoding	CN273898	lincRNA-TMCO5A-2	lincRNA	807	chr15	+	37400695	37401493	AGGATGTGTTTTCATTTCCATAACACTGGAAGCACTTTCTGTAAACCTTTTGATGGACTT	intergenic							299.341	9.30738	8.20521
ASHG19A3A037458	4.74227e-05	8.92929	up	488.87	461.801	476.376	49.7006	59.4909	59.6169	61.3493	8.89734	8.82209	8.90221	5.73953	5.80279	5.48658	5.83245	noncoding	ENST00000425737	RP11-532L16.1	Ensembl	517	chr1	+	200298288	200298805	ATACCATCAAGAAGAAGCTGACAGGGATCCTGCATGAATTACCAGCAAATGGCTACAGGA	intergenic							57.5394	8.87388	5.71534
ASHG19A3L0002132	0.000798396	3.81608	up	96.5701	92.0259	92.9365	24.2407	34.5079	32.2667	30.7208	6.71116	6.64112	6.68424	4.69432	4.88664	4.39713	5.00889	noncoding	DA924741	lincRNA-STMN2-2	lincRNA	554	chr8	+	79717450	79846051	TAACAGTATGAGTTCTGCAGTTATACAGAACTAAGTCCATTAGCTGTGTGACCCATGGCC	natural antisense	NM_001199887	IL7	interleukin-7 isoform 3 precursor	-	79645006	79717758	30.434	6.67884	4.74675
ASHG19A3L0002132	0.000798396	3.81608	up	96.5701	92.0259	92.9365	24.2407	34.5079	32.2667	30.7208	6.71116	6.64112	6.68424	4.69432	4.88664	4.39713	5.00889	noncoding	DA924741	lincRNA-STMN2-2	lincRNA	554	chr8	+	79717450	79846051	TAACAGTATGAGTTCTGCAGTTATACAGAACTAAGTCCATTAGCTGTGTGACCCATGGCC	natural antisense	NM_000880	IL7	interleukin-7 isoform 1 precursor	-	79645006	79717758	30.434	6.67884	4.74675
ASHG19A3L0002132	0.000798396	3.81608	up	96.5701	92.0259	92.9365	24.2407	34.5079	32.2667	30.7208	6.71116	6.64112	6.68424	4.69432	4.88664	4.39713	5.00889	noncoding	DA924741	lincRNA-STMN2-2	lincRNA	554	chr8	+	79717450	79846051	TAACAGTATGAGTTCTGCAGTTATACAGAACTAAGTCCATTAGCTGTGTGACCCATGGCC	natural antisense	NM_001199888	IL7	interleukin-7 isoform 4 precursor	-	79645006	79717758	30.434	6.67884	4.74675
ASHG19A3L0002132	0.000798396	3.81608	up	96.5701	92.0259	92.9365	24.2407	34.5079	32.2667	30.7208	6.71116	6.64112	6.68424	4.69432	4.88664	4.39713	5.00889	noncoding	DA924741	lincRNA-STMN2-2	lincRNA	554	chr8	+	79717450	79846051	TAACAGTATGAGTTCTGCAGTTATACAGAACTAAGTCCATTAGCTGTGTGACCCATGGCC	natural antisense	NM_001199886	IL7	interleukin-7 isoform 2 precursor	-	79645006	79717758	30.434	6.67884	4.74675
ASHG19A3L0002224	0.0120857	4.18977	up	189.634	163.456	141.679	79.0133	28.1857	52.988	36.496	7.63206	7.41962	7.26535	4.96235	5.63176	6.18613	4.70831	noncoding	AI553950	lincRNA-INSL6	lincRNA	449	chr9	+	5131978	5164252	CTTTTTATCCTTATACTCAGGTAGTGACTGCATTTCCCAACTGGTTACTGCTTCCTTCCA	natural antisense	NM_007179	INSL6	insulin-like peptide INSL6 precursor	-	5163862	5185618	49.1707	7.43901	5.37214
ASHG19A3A049691	0.00100101	3.46748	up	39.673	38.1577	38.926	14.5448	11.7827	15.7138	19.1874	5.45505	5.449	5.48781	3.95738	3.77774	3.59957	3.34557	noncoding	AK021576		NRED	2136	chr13	-	79890367	79924372	TTACTAGAACTGATTTTGGGGGACTTTATCCACTCTTACTTGGAACACTAACTGTTGGCT	intron sense-overlapping	NM_022118	RBM26	RNA-binding protein 26	-	79894099	79979923	15.3072	5.46395	3.67006
ASHG19A3A027249	0.000333583	2.84676	up	1299.42	1326.48	1047.85	378.546	402.794	382.944	436.586	10.2184	10.2457	9.97285	8.70819	8.59293	8.55018	8.694	noncoding	ENST00000507241	CTC-428G20.3	Ensembl	2231	chr5	-	114539712	114541943	ATTTTCATCTTGTCATTTAAGTTTCAGCAATTGAGTACCACACTAGAACACCCACAAATG	intergenic							400.218	10.1456	8.63633
ASHG19A3A051064	0.00283129	2.01928	up	83.296	77.6031	83.7663	62.0503	43.6782	46.1218	45.1329	6.50573	6.40239	6.54857	5.28146	5.42582	5.81772	5.36188	noncoding	AK095250		misc_RNA	3037	chr14	-	92223102	92226142	AATCAGTGACTGCAACCCATGCTTGTTGGCAGGTTCTTATACAACCCACTATGAGTTAGC	intergenic							49.2458	6.48556	5.47172
ASHG19A3A026000	0.00146789	2.44967	up	385.714	355.008	334.04	122.946	166.92	155.912	178.769	8.58768	8.46713	8.43255	7.35347	7.24199	6.84128	7.37605	noncoding	ENST00000429329	RP11-662G20.1	Ensembl	489	chr4	+	127484663	127885745	TGGATTGCTTCATGTGTGCTATGCTCCAGCATTTGAAACAGTTGAAGAAACTAGAAAAAA	intergenic							156.137	8.49578	7.2032
ASHG19A3L0000423	0.0269872	2.27201	up	303.423	328.163	238.969	186.501	137.588	102.107	131.493	8.25828	8.3612	7.9621	6.88527	6.60214	7.47029	7.08189	noncoding	AW892975	lincRNA-AMOTL1-1	lincRNA	457	chr11	-	94627686	94628135	CTGGTAGCCCCCTCAATTCCTTGTGGAAAAGATAAAAGATAAAAAACAAGCAAGCAAGAT	intergenic							139.422	8.19386	7.0099
ASHG19A3A040103	0.00335488	3.48602	up	36.3413	37.9301	34.6974	15.1197	11.135	11.4161	20.6965	5.33731	5.44123	5.32175	4.07799	3.26375	3.66345	3.25555	noncoding	AK091999		misc_RNA	2613	chr1	+	219444115	219446727	CTAATCCCCACAGCACAAGTGGGAATTAATGTGTGCTCACTGATTCATGCTGGTTGAAGT	intergenic							14.5918	5.36677	3.56519
ASHG19A3A010451	8.69021e-05	2.46239	up	217.559	207.484	207.035	95.3976	84.772	95.3432	107.768	7.8096	7.74767	7.77478	6.58787	6.50023	6.467	6.35404	noncoding	uc010dko.2	LOC339290	UCSC_knowngene	5487	chr18	+	5238098	5246503	GGTAACATACTAGCAGACCAGATAACTACTTATGCAAACCTCAGATAACCACTAATTTAA	intergenic							95.8201	7.77735	6.47729
ASHG19A3A040283	6.83701e-05	2.57687	up	8070.59	9106.94	8481.85	2572.57	2754.31	2872.16	2807.6	12.784	12.9741	12.919	11.5056	11.5993	11.4326	11.5694	noncoding	ENST00000430258	RP1-298J18.1	Ensembl	551	chrX	-	110867403	110867954	AAAGAAGATGAAGAAGTTTTCAGGGGAGATTGCCTACTCTGGGTGGGTGTTTGAGAAGTC	intergenic							2751.66	12.8923	11.5267
ASHG19A3A052205	0.00173188	3.45014	up	82.279	97.4784	82.3187	41.6919	25.6305	33.5161	26.1585	6.48894	6.71976	6.52243	4.44614	4.94078	5.21665	4.55797	noncoding	ENST00000396071	AC092868.2	Ensembl	777	chr15	-	59693421	59694203	CTTACCATAAACAGGGCCATGCTGAGAAAATACAAATAAAAAAGACTATCAAGATGCATG	intergenic							31.7492	6.57704	4.79039
ASHG19A3A048824	1.47825e-05	9.59296	up	547.178	546.1	548.548	57.0342	56.6095	63.9074	65.0187	9.04494	9.03717	9.08959	5.82926	5.91111	5.68654	5.75412	noncoding	ENST00000420836	AC005294.1	Ensembl	1083	chr12	+	68429546	68430635	ACTGTGGAGGAGGCAGATGCATGCATGGCCACACAAGGGGATGGAAGAGTTGTACAACCA	intergenic							60.6424	9.05723	5.79526
ASHG19A3L0001340	2.90326e-05	7.99934	up	491.34	507.802	493.582	73.5198	69.4855	60.3507	62.5375	8.90261	8.94459	8.95098	5.77072	5.82186	6.07434	6.06446	noncoding	AK094780	lincRNA-GALNTL2-1	lincRNA	3105	chr3	+	15935568	16270147	GTACCAGCACAATTTGAGCATTCCCATTAACAAAGGTGTTCACAGTTGAGAAACTCTCCT	exon sense-overlapping	NM_054110	GALNTL2	polypeptide	+	16216183	16271253	66.4734	8.93273	5.93285
ASHG19A3A016644	0.00369729	2.24254	up	85.3062	103.667	104.012	41.7048	55.9828	58.2957	52.8589	6.53769	6.80135	6.84049	5.52111	5.7695	5.21784	5.73706	noncoding	ENST00000416154	AC079305.5	Ensembl	562	chr2	+	178042422	178042984	AGAGGAAGAAGTACGACATCCCCAAATACCTGTGCTGTAAGATCAGTTTTGAGCTGATGC	intergenic							52.2105	6.72651	5.56137
ASHG19A3A014880	0.000264199	4.07084	up	140.592	159.825	136.079	36.5577	43.861	40.2011	48.402	7.21948	7.38979	7.20835	5.3852	5.2171	5.0186	5.36796	noncoding	ENST00000405197	AC064836.3	Ensembl	704	chr2	-	203200746	203201450	CTGTCCCAAGAGCTAGATGAAGCCATTATGGCGGAAGAGAGTGGTGACATCATCTCTCTC	intergenic							42.2554	7.27254	5.24721
ASHG19A3A025130	0.011567	2.46455	up	205.603	182.126	181.045	108.53	61.6134	111.306	75.9169	7.73613	7.56552	7.59955	6.0629	6.72928	6.65364	5.88381	noncoding	NR_027481	ZNF876P	RefSeq_NR	2621	chr4	+	206388	249771	AATTCATGCTGGAGAGAAACCCCTCATGTGAAGAACGTGTCAGAATCTTTACCTCATCCT	intergenic							89.3414	7.63373	6.33241
ASHG19A3L0000775	5.10965e-06	2.7571	up	5027.97	4882.32	4808.28	1523.9	1409.12	1492.08	1608.95	12.1187	12.1005	12.1216	10.6873	10.6439	10.67	10.6006	noncoding	AB208948	lincRNA-STON2-2	lincRNA	4302	chr14	-	81726999	81893748	CTGTAGAGGTGAGGTTTTGTTTTTAGTTGTTCTACTGATTATATCCTTTTCTGAGCTATG	exon sense-overlapping	NM_033104	STON2	stonin-2	-	81736908	81864927	1508.51	12.1136	10.6505
ASHG19A3A025780	1.51109e-05	2.76857	up	16965.2	16889.9	16490	4654.41	4686.09	4988.04	5279.37	13.826	13.8382	13.8423	12.416	12.3998	12.3132	12.3364	noncoding	ENST00000505987	HSP90AA4P	Ensembl	2173	chr4	+	88812994	88815167	CTTCTCTGAGCTGGCAGAAGACAAGGAGATTATAAGAAATTCTATGAGGCATTTTCTAAA	intergenic							4901.98	13.8355	12.3663
ASHG19A3A049080	0.000393027	2.75417	up	3962.3	3932.5	3342.72	1242.93	1052.64	1240.12	1118.61	11.7811	11.7822	11.6103	10.1484	10.3771	10.3709	10.1553	noncoding	ENST00000477702	NCRNA00173	Ensembl	314	chr12	+	116973868	116974323	TGGAGACTCCTATTCACCCTTCAGATCAATATCCCCCAAATAAACTCCCAGTCACTCTGG	intergenic							1163.57	11.7245	10.2629
ASHG19A3L0001687	0.000213478	2.90667	up	664.4	663.164	653.791	200.909	227.147	234.669	243.111	9.30933	9.30374	9.33367	7.82589	7.86029	7.57909	7.83957	noncoding	CD516039	lincRNA-THBS4	lincRNA	510	chr5	+	79306992	79307717	GATCAAAAACCACTTCATTGAGGAAAGCAACCCACCAAACACAGAAGCAGAAAGAGAGCT	intergenic							226.459	9.31558	7.77621
ASHG19A3A007566	0.00806526	5.52713	up	28.1296	46.3719	38.6583	18.9258	8.35392	5	6.41315	4.97665	5.70897	5.4766	2.46734	2.32995	4.01883	2.86739	noncoding	NR_027696	FLJ39653	RefSeq_NR	2547	chr4	+	16228285	16259810	CCTTAGGGAGCTCCCGGTCCTGCAGGTTTTCACTATTTATTTATGACAAATATTCCACAT	bidirectional	NM_153365	TAPT1	transmembrane anterior posterior transformation	-	16162127	16228161	9.67321	5.38741	2.92088
ASHG19A3A000493	0.00510218	7.30299	up	307.602	294.953	300.805	22.4504	50.1412	65.2836	62.0982	8.27727	8.20804	8.28533	5.76016	5.94542	4.27769	5.57029	noncoding	ENST00000512322	RP11-792D21.2	Ensembl	2095	chr4	+	79567370	79603853	GTTGTATGTTTACCCTACCACAAAGATACAGAATTCTGGAGGAAAGTGGCTCTGGGAATT	intergenic							49.9933	8.25688	5.38839
ASHG19A3A014776	0.0153813	3.07145	up	42.9535	34.5605	32.7579	10.6531	14.5582	26.8321	15.4254	5.56862	5.31713	5.24419	3.61144	4.61022	3.11541	3.69384	noncoding	ENST00000411949	AC006460.2	Ensembl	717	chr2	-	191541760	191573442	GGAATGTGGTGTTTATTGAGGAACAGGCAACCCTTACATTTGAATAAAAGATGCCATATA	intronic antisense	NM_005966	NAB1	NGFI-A-binding protein 1	+	191513847	191557492	16.8672	5.37665	3.75773
ASHG19A3A008093	1.07503e-05	2.94969	up	935.848	947.391	897.198	308.91	273.031	303.6	318.707	9.76937	9.78636	9.76591	8.23478	8.25264	8.2377	8.12814	noncoding	uc001gjk.2	GAS5	UCSC_knowngene	1695	chr1	-	173833039	173837125	AATGGTGAGTTGGGGAACATAGAGAGTACACCTAAGTTCACATGAAGTTGTTTCTTCCCA	bidirectional	NM_032522	ZBTB37	zinc finger and BTB domain-containing protein 37	+	173837492	173842778	301.062	9.77388	8.21331
ASHG19A3A008093	1.07503e-05	2.94969	up	935.848	947.391	897.198	308.91	273.031	303.6	318.707	9.76937	9.78636	9.76591	8.23478	8.25264	8.2377	8.12814	noncoding	uc001gjk.2	GAS5	UCSC_knowngene	1695	chr1	-	173833039	173837125	AATGGTGAGTTGGGGAACATAGAGAGTACACCTAAGTTCACATGAAGTTGTTTCTTCCCA	bidirectional	NM_001122770	ZBTB37	zinc finger and BTB domain-containing protein 37	+	173837492	173855774	301.062	9.77388	8.21331
ASHG19A3L0002750	0.0129354	4.04615	up	1078.87	948.221	891.515	369.905	138.227	318.642	177.501	9.95724	9.78736	9.759	7.34123	8.32489	8.51569	7.09013	noncoding	EB386665	lincRNA-SLN	lincRNA	821	chr11	-	107644071	107644892	GCACAGCCATTTTGTATACTCCCCTGAACTCTTATTCTTTAAGAACGTTGACTTTTCCCC	intergenic							251.069	9.83453	7.81798
ASHG19A3L0001572	0.00584915	2.9404	up	855.575	746.886	789.948	187.37	317.831	218.841	374.815	9.64278	9.46856	9.59594	8.47585	7.75217	7.47691	8.3474	noncoding	BG897081	lincRNA-CSNK1G3-1	lincRNA	416	chr5	-	123716880	123717209	TATTCTCAATAACAGAGAAGAAAAATAGAATTTCTTGCTTTGGGTGTGTGTGTGTGTGTG	intergenic							274.714	9.56909	8.01308
ASHG19A3A029214	4.60824e-05	2.11615	up	416.176	406.933	400.725	195.808	190.439	195.544	223.477	8.69237	8.65832	8.68279	7.69053	7.58114	7.54285	7.571	noncoding	ENST00000433327	RP11-423O2.4	Ensembl	153	chr1	+	142799586	142799739	TCCTGTTTTGAGAATGTTAATGGATACACCAGCTGCTGCTTTGGATTTCACCCATTGGCG	intergenic							201.317	8.67782	7.59638
ASHG19A3A029633	7.70232e-06	2.00979	up	33964.3	34882.9	33649.4	13162.5	12834.2	13539.2	13423.2	14.799	14.8623	14.8802	13.7914	13.8873	13.8435	13.8382	noncoding	NR_001590	IFITM4P	RefSeq_NR	342	chr6	-	29718584	29718925	ATTCACCTACTCCCTGAAGTCTAGGGACAGGAAGATGGTTGGAGACCTGACTGGGGCCCA	intergenic							13239.8	14.8471	13.8401
ASHG19A3A055144	0.000153117	11.6562	up	200.135	192.446	199.138	15.7992	22.2683	20.8675	23.3674	7.70268	7.63894	7.72508	4.2734	4.22616	3.73539	4.34855	noncoding	uc002lal.1	LOC647946	UCSC_knowngene	2306	chr18	-	36786887	37380282	GCGCAATGTGGGGGCACCAGAAGCGGGCACCGTTGAGCTGTTGCAACTGTTCTGCTGGTA	intergenic							20.5756	7.6889	4.14587
ASHG19A3A028338	0.000288957	2.09822	up	242.214	254.077	203.045	119.306	114.985	119.865	132.356	7.95456	8.01104	7.7499	6.89714	6.8439	6.79153	6.81145	noncoding	uc001edc.1	BC047723	UCSC_knowngene	1208	chr1	+	113499036	113542118	GAAAATGCCGGACTGTTGTTTGCAAGCTGGTTAAGTGAGCAAATCTTGGGAAGATTTCAA	bidirectional	NM_001166496	SLC16A1	monocarboxylate transporter 1	-	113454469	113498685	121.628	7.90517	6.836
ASHG19A3A028338	0.000288957	2.09822	up	242.214	254.077	203.045	119.306	114.985	119.865	132.356	7.95456	8.01104	7.7499	6.89714	6.8439	6.79153	6.81145	noncoding	uc001edc.1	BC047723	UCSC_knowngene	1208	chr1	+	113499036	113542118	GAAAATGCCGGACTGTTGTTTGCAAGCTGGTTAAGTGAGCAAATCTTGGGAAGATTTCAA	bidirectional	NM_003051	SLC16A1	monocarboxylate transporter 1	-	113454469	113498975	121.628	7.90517	6.836
ASHG19A3A018947	0.000641189	2.67979	up	104.795	110.095	104.972	43.389	42.7282	46.9111	58.3666	6.8201	6.8832	6.85426	5.66753	5.44927	5.27736	5.32744	noncoding	ENST00000427188	C21orf84	Ensembl	967	chr21	-	44890312	44891472	GGAAGACCTGTTTCTTTTACTTTCCTTGAGGAGAAAAAATTAAAGTTCTGAGCAAACGCA	intergenic							47.8487	6.85252	5.4304
ASHG19A3A026009	3.39267e-05	4.78979	up	463.946	416.459	431.255	106.696	85.0183	90.3493	109.473	8.83449	8.68568	8.77259	6.6101	6.41886	6.62838	6.35984	noncoding	uc003ifn.2	AK090904	UCSC_knowngene	2962	chr4	+	128758921	128761883	ATACTCATGTTTTCTAACAAAACAGCTTTGGATTTATAATGCTGCCAGATGTCATTACAA	intergenic							97.8843	8.76426	6.50429
ASHG19A3A024341	8.91035e-05	2.18787	up	10054.4	10140.4	9934.12	3990.25	3490.31	3687.98	4031.75	13.0958	13.1241	13.1392	12.0197	11.9599	12.0729	11.9083	noncoding	AF086310		misc_RNA	578	chr4	-	76007137	76007705	GTATCAACTTAGCAAACCAAGTCCAAAACATTTTATATGTGTCTATCTTTCCTGCTGTTC	intergenic							3800.07	13.1197	11.9902
ASHG19A3L0000303	0.000617968	2.59283	up	90.4322	90.4683	89.5481	36.85	44.7306	39.0767	48.4505	6.61378	6.61577	6.63758	5.38654	5.17565	5.03021	5.399	noncoding	BU626341	lincRNA-RDX-2	lincRNA	692	chr11	+	110090981	110091622	CTATGTATCTAATGTGCTGTGAACTGATAAAACCTGGATCTAAACAGCCTCTGTAAAAAA	intergenic							42.2769	6.62238	5.24785
ASHG19A3A024184	7.47666e-05	4.81926	up	61.1924	52.7076	59.4821	17.0815	14.1602	15.6168	15.9612	6.06165	5.87867	6.06766	3.66691	3.76641	3.85573	3.64634	noncoding	ENST00000508433	RP11-89B16.2	Ensembl	640	chr4	-	54793665	54794305	ATTCTGATTTCCTAACTTCAATGAGCCAAACTCAGAGTATAGCAACCAGCAGGCGCCCAA	intergenic							15.7049	6.00266	3.73385
ASHG19A3A036526	7.34912e-05	6.39098	up	1196.21	1211.77	1232.68	177.11	161.369	193.487	205.845	10.0959	10.1245	10.1982	7.57048	7.56418	7.39287	7.3265	noncoding	uc003xjb.2	BC034319	UCSC_knowngene	837	chr8	+	32785487	32902372	CTGCAGGTTAAGAGAAATTGAGAAACGATGGAGAATTTAAGTGTTTTAGATCCTACATAC	intergenic							184.453	10.1395	7.4635
ASHG19A3A025718	0.000162258	7.30029	up	269.418	270.958	265.316	36.0256	40.0404	38.2646	54.0496	8.09076	8.09866	8.10894	5.55199	5.14372	4.99951	5.23076	noncoding	uc003hlf.2	AK130099	UCSC_knowngene	2778	chr4	+	79567337	79604337	AAAGGCATCCGAATGGTCTAAGTAATGCCATCCATCTGTCAGTAATAGATTCAGAAATGG	intergenic							42.095	8.09945	5.2315
ASHG19A3A019919	0.0150681	3.5471	up	36.0131	41.9248	37.3063	14.8068	12.2716	9.22538	26.3603	5.32676	5.57375	5.42582	4.45727	2.9607	3.63023	3.41369	noncoding	AB051448		NRED	6475	chr22	-	45373647	45476304	TTTTTGTTTCTTCCAGACGAATACCAACACTGAAGGAGAATGATGACGGTGTTGGGGGCT	intron sense-overlapping	NM_138415	PHF21B	PHD finger protein 21B isoform 1	-	45277042	45405581	15.666	5.44211	3.61547
ASHG19A3A019919	0.0150681	3.5471	up	36.0131	41.9248	37.3063	14.8068	12.2716	9.22538	26.3603	5.32676	5.57375	5.42582	4.45727	2.9607	3.63023	3.41369	noncoding	AB051448		NRED	6475	chr22	-	45373647	45476304	TTTTTGTTTCTTCCAGACGAATACCAACACTGAAGGAGAATGATGACGGTGTTGGGGGCT	intron sense-overlapping	NM_001135862	PHF21B	PHD finger protein 21B isoform 2	-	45277042	45405809	15.666	5.44211	3.61547
ASHG19A3A052309	2.68905e-05	2.37474	up	244.633	232.984	244.373	113.848	106.495	111.215	114.302	7.9648	7.89932	7.99268	6.67543	6.72696	6.72022	6.69539	noncoding	uc002aqr.1	BC047537	UCSC_knowngene	3969	chr15	-	67697735	67814182	GAGCGCCGTGAAGAAGCGGTTCTGCCGGGCCAGGTCCTGCCAGGGAGCCTTGGAGCAGTG	natural antisense	NM_001031715	IQCH	IQ domain-containing protein H isoform 1	+	67547137	67794142	111.465	7.95227	6.7045
ASHG19A3A052309	2.68905e-05	2.37474	up	244.633	232.984	244.373	113.848	106.495	111.215	114.302	7.9648	7.89932	7.99268	6.67543	6.72696	6.72022	6.69539	noncoding	uc002aqr.1	BC047537	UCSC_knowngene	3969	chr15	-	67697735	67814182	GAGCGCCGTGAAGAAGCGGTTCTGCCGGGCCAGGTCCTGCCAGGGAGCCTTGGAGCAGTG	natural antisense	NM_001143936	C15orf61	hypothetical protein LOC145853 precursor	+	67813521	67819641	111.465	7.95227	6.7045
ASHG19A3A043824	2.26406e-05	2.83942	up	133.42	125.53	133.231	53.4446	54.2832	52.6305	55.3987	7.14599	7.06131	7.18211	5.59042	5.62122	5.5942	5.69099	noncoding	ENST00000424719	RP5-884C9.3	Ensembl	338	chr1	-	38546247	38546585	GAAACCCAAAGAGACAAATCTGAAGAGACTCTGGATGAGGGTCCTCCAAAATACATAAAA	intergenic							53.9392	7.1298	5.62421
ASHG19A3A007941	0.000631347	2.40564	up	936.348	952.392	1001.27	344.935	370.641	394.577	413.612	9.76971	9.79518	9.91849	8.62285	8.6374	8.4131	8.57214	noncoding	ENST00000425294	RP3-471M13.1	Ensembl	312	chr1	-	172855086	172855398	AACACTATTAATGAGTGTGTGGCTCCATACCAAGGAGCTCCCTTTGAGGTGAAAGGGAAA	intergenic							380.941	9.82779	8.56137
ASHG19A3L0002544	0.0238669	3.46287	up	94.2645	106.264	104.727	71.2988	20.0228	46.7321	23.9328	6.67793	6.83392	6.84936	4.31153	5.44379	6.02735	4.19773	noncoding	BM805159	lincRNA-THSD7A-2	lincRNA	1079	chr7	+	11233008	11424086	CTTCATAAGGATATTTTTCAAGTTTGTGGGCTTGTCCTGGTACCTTCTACTGTGTAGAAG	intronic antisense	NM_015204	THSD7A	thrombospondin type-1 domain-containing protein	-	11410061	11871824	40.4966	6.78707	4.9951
ASHG19A3A049639	7.85126e-05	2.98159	up	61.6022	60.1926	54.2316	21.9594	24.4312	25.4841	27.4813	6.07097	6.05581	5.94046	4.51958	4.5326	4.24456	4.48858	noncoding	ENST00000397973	RP11-129M14.1	Ensembl	869	chr13	-	65883986	65885085	AAGGTCTTGCAGAAGATGATCAGAAAAGATACATTCATTGCCCATGAGCTGGCTGCAGAG	intergenic							24.839	6.02241	4.44633
ASHG19A3L0000954	6.92661e-06	5.17148	up	19204.9	18413.2	17437.6	2617.01	2803.63	2936.68	3120.44	13.992	13.958	13.9234	11.6608	11.6357	11.4578	11.5946	noncoding	AK293062	lincRNA-GALNT1-2	lincRNA	2194	chr18	+	33161002	33290012	GCACACTGATGTTTACAAGATTGAAAGAGTCTTTCTCCGAAAATCATGGTAAAGAATACT	exon sense-overlapping	NM_020474	GALNT1	polypeptide N-acetylgalactosaminyltransferase 1	+	33234532	33291798	2869.44	13.9578	11.5872
ASHG19A3L0003517	0.000111725	2.89187	up	4713.83	4718.55	4245.11	1444.04	1285.02	1314.88	1337.95	12.0397	12.051	11.9599	10.4262	10.4651	10.5974	10.4507	noncoding	BC150253	lincRNA-SEMA6D-3	lincRNA	5955	chr15	+	47476402	48066417	CGGCATAAAAAGTAACCCTCAAGTGAAGTGTCTCTATACTGTTTTATAGAGTACTTTAAC	exon sense-overlapping	NM_001198999	SEMA6D	semaphorin-6D isoform 1 precursor	+	47476402	48066420	1345.47	12.0169	10.4849
ASHG19A3L0003517	0.000111725	2.89187	up	4713.83	4718.55	4245.11	1444.04	1285.02	1314.88	1337.95	12.0397	12.051	11.9599	10.4262	10.4651	10.5974	10.4507	noncoding	BC150253	lincRNA-SEMA6D-3	lincRNA	5955	chr15	+	47476402	48066417	CGGCATAAAAAGTAACCCTCAAGTGAAGTGTCTCTATACTGTTTTATAGAGTACTTTAAC	exon sense-overlapping	NM_024966	SEMA6D	semaphorin-6D isoform 6 precursor	+	48010685	48057677	1345.47	12.0169	10.4849
ASHG19A3L0003517	0.000111725	2.89187	up	4713.83	4718.55	4245.11	1444.04	1285.02	1314.88	1337.95	12.0397	12.051	11.9599	10.4262	10.4651	10.5974	10.4507	noncoding	BC150253	lincRNA-SEMA6D-3	lincRNA	5955	chr15	+	47476402	48066417	CGGCATAAAAAGTAACCCTCAAGTGAAGTGTCTCTATACTGTTTTATAGAGTACTTTAAC	exon sense-overlapping	NM_020858	SEMA6D	semaphorin-6D isoform 1 precursor	+	48010685	48066420	1345.47	12.0169	10.4849
ASHG19A3L0003517	0.000111725	2.89187	up	4713.83	4718.55	4245.11	1444.04	1285.02	1314.88	1337.95	12.0397	12.051	11.9599	10.4262	10.4651	10.5974	10.4507	noncoding	BC150253	lincRNA-SEMA6D-3	lincRNA	5955	chr15	+	47476402	48066417	CGGCATAAAAAGTAACCCTCAAGTGAAGTGTCTCTATACTGTTTTATAGAGTACTTTAAC	exon sense-overlapping	NM_153618	SEMA6D	semaphorin-6D isoform 4 precursor	+	48010685	48066420	1345.47	12.0169	10.4849
ASHG19A3L0003517	0.000111725	2.89187	up	4713.83	4718.55	4245.11	1444.04	1285.02	1314.88	1337.95	12.0397	12.051	11.9599	10.4262	10.4651	10.5974	10.4507	noncoding	BC150253	lincRNA-SEMA6D-3	lincRNA	5955	chr15	+	47476402	48066417	CGGCATAAAAAGTAACCCTCAAGTGAAGTGTCTCTATACTGTTTTATAGAGTACTTTAAC	exon sense-overlapping	NM_153617	SEMA6D	semaphorin-6D isoform 3 precursor	+	48010685	48066420	1345.47	12.0169	10.4849
ASHG19A3L0003517	0.000111725	2.89187	up	4713.83	4718.55	4245.11	1444.04	1285.02	1314.88	1337.95	12.0397	12.051	11.9599	10.4262	10.4651	10.5974	10.4507	noncoding	BC150253	lincRNA-SEMA6D-3	lincRNA	5955	chr15	+	47476402	48066417	CGGCATAAAAAGTAACCCTCAAGTGAAGTGTCTCTATACTGTTTTATAGAGTACTTTAAC	exon sense-overlapping	NM_153616	SEMA6D	semaphorin-6D isoform 2 precursor	+	48010685	48066420	1345.47	12.0169	10.4849
ASHG19A3L0003517	0.000111725	2.89187	up	4713.83	4718.55	4245.11	1444.04	1285.02	1314.88	1337.95	12.0397	12.051	11.9599	10.4262	10.4651	10.5974	10.4507	noncoding	BC150253	lincRNA-SEMA6D-3	lincRNA	5955	chr15	+	47476402	48066417	CGGCATAAAAAGTAACCCTCAAGTGAAGTGTCTCTATACTGTTTTATAGAGTACTTTAAC	exon sense-overlapping	NM_153619	SEMA6D	semaphorin-6D isoform 5 precursor	+	48010685	48066420	1345.47	12.0169	10.4849
ASHG19A3A014639	0.0103763	3.38902	up	1427.85	1338.27	1409.02	516.319	239.025	527.131	317.397	10.3431	10.2579	10.3843	8.22842	9.08425	9.03844	7.9191	noncoding	ENST00000444235	RPL5P7	Ensembl	813	chr2	-	174736380	174737193	CTCACAATACATAAAGAACTGCATAACTCCAGACTTGGTGGAGGAGCTCATGCTGCTGTA	intergenic							399.968	10.3284	8.56755
ASHG19A3L0000633	9.27564e-05	2.77495	up	188.197	197.958	197.951	83.492	85.2312	72.9474	75.6608	7.62063	7.67954	7.71719	6.0578	6.10904	6.26943	6.36369	noncoding	BQ045000	lincRNA-NUDT15-1	lincRNA	615	chr13	+	48578770	48611972	CAGGAGTCGGAGTCGGAGTCGTGGTGACCAGCTGCAAGCATCCGCGTTGCGCCTCGTGCC	exon sense-overlapping	NM_018283	NUDT15	probable 7,8-dihydro-8-oxoguanine triphosphatase	+	48611702	48621282	79.3329	7.67245	6.19999
ASHG19A3L0003054	0.000955411	3.19528	up	401.685	377.859	403.566	170.506	133.326	114.785	113.941	8.64068	8.55584	8.69182	6.66961	6.77449	7.33481	7.03509	noncoding	chr8:48104990-48105990-	lincRNA-POTEA-2	lincRNA	1001	chr8	-	48104990	48105990	AGTGACTACTGCTGTAATTGCTTAGGCTGCTGTTAGTTTCTCTTAATCAAAATTACTATG	intergenic							133.14	8.62944	6.9535
ASHG19A3A029224	0.0201047	3.26872	up	1189.9	1111.67	1158.16	445.313	154.738	416.884	419.435	10.0894	9.99582	10.1153	8.64835	8.72329	8.80045	7.26036	noncoding	ENST00000457776	RP11-423O2.6	Ensembl	1746	chr1	+	142803531	142827235	CAAAGAAAGAAAGATTGGGAAAACGTATCCTCAGCAATTTCCCAAGAAACTGAAGGAAGA	intergenic							359.093	10.0668	8.35811
ASHG19A3A052796	1.45361e-05	2.29185	up	8214.12	7967.15	7210.31	2709.49	2740.99	2840.92	2957.2	12.8095	12.782	12.6798	11.5875	11.5859	11.5072	11.5615	noncoding	NR_026757	LOC729082	RefSeq_NR	1894	chr15	+	41576200	41591794	TCCAAATCAGCAGAGGACCATTGTATGTATTGTCAGGTCTTTATATAAGAGTGAAACCTT	intergenic							2812.15	12.7571	11.5605
ASHG19A3A018502	0.00119973	11.1746	up	788.169	800.893	773.79	43.0415	77.2552	79.6817	106.745	9.53424	9.55914	9.56653	6.57224	6.23227	5.26281	6.2173	noncoding	BC002831		misc_RNA	1013	chr20	+	57209827	57210789	CTTCCCTATTCCATCCTTTGATGGGTGGCCTGTTACACGTTTGGAAATAAAAACAAGTGG	intergenic							76.6809	9.55331	6.07116
ASHG19A3A026524	0.000558661	4.63114	up	112.869	94.5428	102.392	27.4968	23.4739	31.7889	26.9297	6.92011	6.67878	6.81858	4.48976	4.86486	4.59448	4.42871	noncoding	BC043160		misc_RNA	2454	chr5	-	10195298	10197734	TCATTTGGTGACTGGAGAGGTGGATTGTAGCTACATGAGGACTCCAGACATTCACCAATA	intergenic							27.4223	6.80582	4.59446
ASHG19A3L0002977	3.86696e-05	5.44992	up	327.746	305.441	326.048	76.1836	61.692	57.0953	64.905	8.36754	8.26075	8.39779	5.82751	5.74145	6.12869	5.88551	noncoding	BM956062	lincRNA-PGS1	lincRNA	174	chr17	+	76360558	76360732	AAAGGAATGAAGACGAAAACGTTTCTGAAAATGTGGGTGGAGACACCTGGGCCTTTACAG	intergenic							64.969	8.34202	5.89579
ASHG19A3A041285	0.00571425	2.02454	up	2658.93	2408.81	2838.94	961.661	1116.93	1270.73	1155.85	11.2184	11.0929	11.3784	10.2025	10.4171	9.98956	10.2401	noncoding	ENST00000395772	EEF1A1P15	Ensembl	1352	chrX	+	97644507	97645918	ATCATGGCAACATTGCTGGTGACAGCAAACATAATCAACCAATTGGCTTCACTGCTCAGG	intergenic							1126.29	11.2299	10.2123
ASHG19A3A039320	0.000256108	2.4014	up	1155.91	1223.11	1204.67	475.414	444.114	416.775	503.953	10.0517	10.1396	10.1651	8.93527	8.7229	8.9067	8.85496	noncoding	ENST00000423122	RP11-65J3.1	Ensembl	545	chr9	+	132104121	132121817	TTCTTTCCCTGAGGACCATCTGGAGTGGACGCGTGCACTACCCCTCTCTGAATACACCCT	intergenic							460.064	10.1188	8.85496
ASHG19A3L0002106	0.000239913	27.1663	up	252.313	253.578	223.169	14.9715	6.92087	13.2372	10.3438	8.00604	8.00877	7.87099	2.98614	3.49621	3.64857	2.66184	noncoding	AL137390	lincRNA-NKAIN3	lincRNA	1202	chr8	+	62791440	62798121	ATTAAGGCTGTGTTCGAGCCATGATCTTCCTCTGAAGAAGAAATGAAGAAGAAATTTATC	intergenic							11.3683	7.96194	3.19819
ASHG19A3A013611	0.00499874	8.05097	up	428.511	360.481	322.703	81.1109	29.5805	70.8614	38.178	8.73198	8.49252	8.37936	5.02662	6.06872	6.2274	4.77907	noncoding	ENST00000447571	AC079807.4	Ensembl	1808	chr2	-	48168834	48468122	ACTGGTTGAAGGAAATCCATGTTGGGCTTCTGTGGATGCTGGATTCTTTCCTTCTGAGAA	intergenic							54.9327	8.53462	5.52545
ASHG19A3L0001648	7.30475e-05	2.24415	up	1773.48	1728.66	1488.4	623.025	647.07	655.193	709.343	10.6449	10.607	10.4622	9.46079	9.41384	9.31764	9.42857	noncoding	AK297077	lincRNA-FYB	lincRNA	2747	chr5	-	39107403	39270759	GCCAATGTGAAGTCTGGATTTTAATTGGCATGTTATTGGGTATCAAGAAAATTAATGCAC	exon sense-overlapping	NM_199335	FYB	FYN-binding protein isoform 2	-	39105356	39219667	658.658	10.5714	9.40521
ASHG19A3L0001648	7.30475e-05	2.24415	up	1773.48	1728.66	1488.4	623.025	647.07	655.193	709.343	10.6449	10.607	10.4622	9.46079	9.41384	9.31764	9.42857	noncoding	AK297077	lincRNA-FYB	lincRNA	2747	chr5	-	39107403	39270759	GCCAATGTGAAGTCTGGATTTTAATTGGCATGTTATTGGGTATCAAGAAAATTAATGCAC	exon sense-overlapping	NM_001465	FYB	FYN-binding protein isoform 1	-	39105356	39219667	658.658	10.5714	9.40521
ASHG19A3A000059	0.000862914	2.87045	up	51.2762	44.0179	42.4555	18.793	17.5321	24.3759	22.2523	5.81673	5.63657	5.60487	4.19537	4.46672	4.00766	3.98938	noncoding	ENST00000339037	AC017048.3	Ensembl	838	chr2	-	177494892	177502290	ACTCACCTGGTTGAAGCCATAAAGAGTTCAATATTTCAAGTGAAAATCTGCCTGTTCGAA	intergenic							20.7383	5.68606	4.16478
ASHG19A3A046574	0.00271582	3.81672	up	258.165	247.477	251.394	49.3703	75.6067	85.8994	90.8228	8.03806	7.97628	8.03145	6.32554	6.34159	5.47709	6.1875	noncoding	ENST00000439156	RP11-776H12.1	Ensembl	1796	chr1	-	61005920	61106163	ACCAAGTTTAGCCTGCCTTTGCTATTTTGGCGTATCTCCAATTCTTCATGATTTTCTCAT	intergenic							75.4248	8.01526	6.08293
ASHG19A3A030746	6.50215e-05	2.44063	up	2521.65	2468.32	2454.11	840.407	888.117	920.22	911.046	11.1543	11.1257	11.171	9.84307	9.92591	9.78038	9.90306	noncoding	ENST00000344851	RP1-274L14.2	Ensembl	1979	chr6	-	158658367	158663829	TTATTTCTGCTTACTCACTTGCAGATCCAGAGAAAGGCACAGCTCTTAGTAAACATTTGC	intergenic							889.948	11.1504	9.8631
ASHG19A3A008479	0.00134849	2.71306	up	29.5623	24.4709	34.4181	14.9896	15.563	15.2187	13.2793	5.04883	4.85956	5.31037	3.35358	3.72566	3.65059	3.80217	noncoding	uc010wkn.1	DQ577523	UCSC_knowngene	2097	chr17	-	45129891	45131988	CATCATGAGACAGCACATTCCTACAATGTCGTACAGATGTAAATTCTCAAATTAATCTAC	intergenic							14.7627	5.07292	3.633
ASHG19A3A014288	4.26698e-05	18.1727	up	8416.36	8402.52	8123.97	438.676	425.571	323.006	459.703	12.8497	12.862	12.8574	8.78913	8.34102	8.7781	8.78257	noncoding	ENST00000393071	AC013474.3	Ensembl	732	chr2	-	127315006	127315739	AATTACTGAGAGACAACTTGACATTGTGGACATCGGATACCCAAGGAGACGAAGCTGAAG	intergenic							411.739	12.8564	8.6727
ASHG19A3A055089	0.0231366	2.6073	up	91.2191	86.018	77.4773	55.5001	25.032	55.7523	31.3678	6.62616	6.54101	6.43351	4.72824	5.70557	5.64686	4.52334	noncoding	uc001ldf.2	EMX2	UCSC_knowngene	7024	chr10	-	119243804	119301924	AACTGGGATCGCCCCAAGAGCACCGCGAGGggtcatctcaggctggctgcatgcctcagc	bidirectional	NM_001165924	EMX2	homeobox protein EMX2 isoform 2	+	119301955	119309057	41.913	6.53356	5.15101
ASHG19A3A055089	0.0231366	2.6073	up	91.2191	86.018	77.4773	55.5001	25.032	55.7523	31.3678	6.62616	6.54101	6.43351	4.72824	5.70557	5.64686	4.52334	noncoding	uc001ldf.2	EMX2	UCSC_knowngene	7024	chr10	-	119243804	119301924	AACTGGGATCGCCCCAAGAGCACCGCGAGGggtcatctcaggctggctgcatgcctcagc	bidirectional	NM_004098	EMX2	homeobox protein EMX2 isoform 1	+	119301955	119309057	41.913	6.53356	5.15101
ASHG19A3A028580	0.00236765	2.3125	up	77.9907	71.6187	71.9919	31.425	42.1009	42.31	41.4667	6.419	6.29426	6.33094	5.15541	5.29451	4.7963	5.30823	noncoding	BC017431		misc_RNA	2097	chr5	+	102183195	102185259	TATATACTGACTTATGAGCGTCCCACAAAGAAAAGACCAACTTGATGCTCAGGCCTCCTC	intergenic							39.3257	6.34807	5.13861
ASHG19A3A051789	0.008326	3.27485	up	82.0379	82.1984	82.9941	51.7457	24.6253	31.6154	23.0143	6.48586	6.4802	6.5342	4.24948	4.85593	5.54865	4.50057	noncoding	ENST00000414488	AL132709.5	Ensembl	800	chr14	+	101415314	101424887	ATGCAATGAGCTGATCATTTTGCTGTGATCAAGGCTATGTTGCCTCTGTGTTAGGCCAAT	intergenic							32.7502	6.50009	4.78866
ASHG19A3A050106	0.000132021	29.8249	up	1474.23	1359.99	1031	52.4064	40.1246	43.2963	40.1238	10.3876	10.2792	9.95267	5.10306	5.32849	5.56703	5.23365	noncoding	ENST00000419514	RP11-366O17.2	Ensembl	192	chr13	+	43385972	43386428	TTTTTTTAAAAGCCACAGTTTCATTGTCTTAGTCAAAGCAAGATTATTACGTGATTATTT	intergenic							43.9878	10.2065	5.30806
ASHG19A3L0002331	0.00554794	3.19489	up	36.9691	29.7522	36.207	12.3761	16.6066	17.7945	12.2479	5.3592	5.1157	5.38569	3.22671	3.97659	3.33647	3.90462	noncoding	AL538236	lincRNA-MAGEE1-1	lincRNA	1127	chrX	+	75404868	75405949	AACAACTATTTATTCGGAATGTGGTAGCATTCCAATAAGACATCTTTTGGAGGCAGGAAA	intergenic							14.7563	5.28686	3.6111
ASHG19A3A007567	0.0279761	2.19829	up	29.8959	26.8456	37.5883	12.779	20.2783	21.0312	23.182	5.0651	4.98392	5.43842	4.26158	4.23845	3.38719	4.21716	noncoding	NR_027697	FLJ39653	RefSeq_NR	2496	chr4	+	16228285	16259810	CCTTAGGGAGCTCCCGGTCCTGCAGTCAAAACTTCTTTGAGACGATGCTGTCGGCCTTGG	bidirectional	NM_153365	TAPT1	transmembrane anterior posterior transformation	-	16162127	16228161	19.3176	5.16248	4.02609
ASHG19A3A043676	0.000198921	41.744	up	5231.75	4633.84	5098.39	154.616	96.5227	138.32	84.3527	12.1808	12.0261	12.2015	6.22074	7.05681	7.18234	6.55065	noncoding	ENST00000419987	RP11-188P8.2	Ensembl	799	chr10	+	20036751	20037550	GTAATGTCTGGTATACTTCTGATATGACAAAAACTAGCCCCTATCTCGATTATGTTTCAA	intergenic							118.453	12.1361	6.75263
ASHG19A3A047893	0.0220741	2.03557	up	611.513	615.385	604.987	378.062	190.647	372.303	285.681	9.20302	9.20433	9.22617	8.07197	8.55049	8.54754	7.57297	noncoding	uc001tcu.2	AK098304	UCSC_knowngene	3324	chr12	-	93936239	93965544	CAAGAGAAGCAGGCTCTCCCCTTCTGAAATGATGAGTGATAATGACCATACAGGTCAACT	intronic antisense	NM_003877	SOCS2	suppressor of cytokine signaling 2	+	93963597	93969978	306.673	9.21118	8.18574
ASHG19A3L0000348	2.83738e-06	4.51524	up	2907.83	2723.97	2965.94	600.921	561.407	501.063	605.405	11.3508	11.2584	11.4406	9.21066	9.01496	9.26382	9.21112	noncoding	DA922283	lincRNA-TH	lincRNA	568	chr11	-	2229882	2230451	TTTCTGCTTGGCACCTGGCTTGCCATCCCGCTCTACCCCAGGGCACTCAGACCTCAAACT	intergenic							567.199	11.3499	9.17514
ASHG19A3A039319	0.00172114	2.53598	up	356.808	330.412	315.159	132.929	125.615	118.012	197.876	8.48221	8.36888	8.34852	7.50824	6.82119	6.95349	6.94638	noncoding	uc004bxt.1	AX747401	UCSC_knowngene	1772	chr9	+	132098802	132100574	TTTCCTAATTTGTCAGGATTTTAGGCCACATGGCAGCTGGGGGCAGAAACATTTCTGAGA	intergenic							143.608	8.39987	7.05732
ASHG19A3A039805	0.00318188	3.07772	up	44.5645	26.0757	27.8393	11.5682	11.8949	16.9098	17.3111	5.62057	4.94154	5.02355	3.79869	3.89653	3.23751	3.3607	noncoding	BC038573		misc_RNA	556	chrX	-	46746855	46759139	TTCCATGGCACTAGGCTGTACCACAGTCATAGAAAGAGGAACTTTAAGAAGACTAAAGAG	intergenic							14.421	5.19522	3.57336
ASHG19A3L0000970	0.00121834	2.8066	up	397.426	419.926	379.421	169.096	141.234	170.923	124.227	8.62545	8.69671	8.61331	6.80135	7.3775	7.32238	7.12412	noncoding	AK303027	lincRNA-SMAD4	lincRNA	1207	chr18	+	48494409	48584514	ATTCAATTCAAACCATCCAGCATCCACCAAGTAATCGTGCATCGACAGAGACATACAGCA	exon sense-overlapping	NM_005359	SMAD4	mothers against decapentaplegic homolog 4	+	48556582	48611411	151.37	8.64516	7.15634
ASHG19A3L0000970	0.00121834	2.8066	up	397.426	419.926	379.421	169.096	141.234	170.923	124.227	8.62545	8.69671	8.61331	6.80135	7.3775	7.32238	7.12412	noncoding	AK303027	lincRNA-SMAD4	lincRNA	1207	chr18	+	48494409	48584514	ATTCAATTCAAACCATCCAGCATCCACCAAGTAATCGTGCATCGACAGAGACATACAGCA	exon sense-overlapping	NM_018696	ELAC1	zinc phosphodiesterase ELAC protein 1	+	48494386	48514490	151.37	8.64516	7.15634
ASHG19A3A029632	9.15372e-05	2.53363	up	47152.5	46279.4	43459.4	14494.1	13274.9	14383	13505.5	15.2623	15.2648	15.2341	13.8004	13.9712	13.9879	13.8907	noncoding	ENST00000441380	IFITM4P	Ensembl	420	chr6	-	29718505	29718925	ATCATGACCATTCTGCTCACCGTCATCATCCTAGTGTTGATCTTCCAAGTCTGTCGATAG	intergenic							13914.4	15.2537	13.9125
ASHG19A3L0002366	0.000476544	8.23087	up	108.871	111.29	106.19	12.2737	15.8015	18.6648	21.6833	6.87132	6.89919	6.87048	4.15738	4.05358	3.32224	3.82395	noncoding	AK291502	lincRNA-HIST2H2BF	lincRNA	1686	chr1	+	149369293	149763584	CACACACAGCCAGGAGTGGGTAGATTTCAGGGAGACAAGAGGGAATAGTATAGACAATAA	intron sense-overlapping	NM_001135789	PPIAL4C	peptidylprolyl cis-trans isomerase A-like	+	149553002	149553787	17.1058	6.88033	3.83929
ASHG19A3L0002366	0.000476544	8.23087	up	108.871	111.29	106.19	12.2737	15.8015	18.6648	21.6833	6.87132	6.89919	6.87048	4.15738	4.05358	3.32224	3.82395	noncoding	AK291502	lincRNA-HIST2H2BF	lincRNA	1686	chr1	+	149369293	149763584	CACACACAGCCAGGAGTGGGTAGATTTCAGGGAGACAAGAGGGAATAGTATAGACAATAA	intron sense-overlapping	NM_001143883	PPIAL4B	peptidylprolyl cis-trans isomerase A-like	+	149553002	149553787	17.1058	6.88033	3.83929
ASHG19A3L0002366	0.000476544	8.23087	up	108.871	111.29	106.19	12.2737	15.8015	18.6648	21.6833	6.87132	6.89919	6.87048	4.15738	4.05358	3.32224	3.82395	noncoding	AK291502	lincRNA-HIST2H2BF	lincRNA	1686	chr1	+	149369293	149763584	CACACACAGCCAGGAGTGGGTAGATTTCAGGGAGACAAGAGGGAATAGTATAGACAATAA	intron sense-overlapping	NM_178230	PPIAL4A	peptidylprolyl cis-trans isomerase A-like 4B	+	149553002	149553662	17.1058	6.88033	3.83929
ASHG19A3L0002366	0.000476544	8.23087	up	108.871	111.29	106.19	12.2737	15.8015	18.6648	21.6833	6.87132	6.89919	6.87048	4.15738	4.05358	3.32224	3.82395	noncoding	AK291502	lincRNA-HIST2H2BF	lincRNA	1686	chr1	+	149369293	149763584	CACACACAGCCAGGAGTGGGTAGATTTCAGGGAGACAAGAGGGAATAGTATAGACAATAA	exon sense-overlapping	NM_000566	FCGR1A	high affinity immunoglobulin gamma Fc receptor I	+	149754249	149764074	17.1058	6.88033	3.83929
ASHG19A3L0002366	0.000476544	8.23087	up	108.871	111.29	106.19	12.2737	15.8015	18.6648	21.6833	6.87132	6.89919	6.87048	4.15738	4.05358	3.32224	3.82395	noncoding	AK291502	lincRNA-HIST2H2BF	lincRNA	1686	chr1	+	149369293	149763584	CACACACAGCCAGGAGTGGGTAGATTTCAGGGAGACAAGAGGGAATAGTATAGACAATAA	intronic antisense	NM_001161334	HIST2H2BF	histone H2B type 2-F isoform b	-	149754244	149783928	17.1058	6.88033	3.83929
ASHG19A3L0002366	0.000476544	8.23087	up	108.871	111.29	106.19	12.2737	15.8015	18.6648	21.6833	6.87132	6.89919	6.87048	4.15738	4.05358	3.32224	3.82395	noncoding	AK291502	lincRNA-HIST2H2BF	lincRNA	1686	chr1	+	149369293	149763584	CACACACAGCCAGGAGTGGGTAGATTTCAGGGAGACAAGAGGGAATAGTATAGACAATAA	intronic antisense	NM_001024599	HIST2H2BF	histone H2B type 2-F isoform a	-	149397113	149399229	17.1058	6.88033	3.83929
ASHG19A3L0000085	0.00741043	5.78172	up	48.2723	113.196	57.8859	20.3995	11.9633	12.7078	17.9266	5.73312	6.91939	6.03229	3.85595	3.4303	4.13309	3.36774	noncoding	BQ302800	lincRNA-PRSS38	lincRNA	740	chr1	-	227890324	228285713	CACCATGAGGATGCGCATTTCTTTTTTGCCAAAAAGGCCCTTGAATGCGTGTCGAAGTTG	natural antisense	NM_001024226	ARF1	ADP-ribosylation factor 1	+	228270360	228286913	15.7493	6.22827	3.69677
ASHG19A3L0000085	0.00741043	5.78172	up	48.2723	113.196	57.8859	20.3995	11.9633	12.7078	17.9266	5.73312	6.91939	6.03229	3.85595	3.4303	4.13309	3.36774	noncoding	BQ302800	lincRNA-PRSS38	lincRNA	740	chr1	-	227890324	228285713	CACCATGAGGATGCGCATTTCTTTTTTGCCAAAAAGGCCCTTGAATGCGTGTCGAAGTTG	intron sense-overlapping	NM_003395	WNT9A	protein Wnt-9a precursor	-	228109164	228135676	15.7493	6.22827	3.69677
ASHG19A3L0000085	0.00741043	5.78172	up	48.2723	113.196	57.8859	20.3995	11.9633	12.7078	17.9266	5.73312	6.91939	6.03229	3.85595	3.4303	4.13309	3.36774	noncoding	BQ302800	lincRNA-PRSS38	lincRNA	740	chr1	-	227890324	228285713	CACCATGAGGATGCGCATTTCTTTTTTGCCAAAAAGGCCCTTGAATGCGTGTCGAAGTTG	intron sense-overlapping	NM_001161465	JMJD4	jmjC domain-containing protein 4 isoform 2	-	227918889	227923112	15.7493	6.22827	3.69677
ASHG19A3L0000085	0.00741043	5.78172	up	48.2723	113.196	57.8859	20.3995	11.9633	12.7078	17.9266	5.73312	6.91939	6.03229	3.85595	3.4303	4.13309	3.36774	noncoding	BQ302800	lincRNA-PRSS38	lincRNA	740	chr1	-	227890324	228285713	CACCATGAGGATGCGCATTTCTTTTTTGCCAAAAAGGCCCTTGAATGCGTGTCGAAGTTG	natural antisense	NM_001024227	ARF1	ADP-ribosylation factor 1	+	228270850	228286913	15.7493	6.22827	3.69677
ASHG19A3L0000085	0.00741043	5.78172	up	48.2723	113.196	57.8859	20.3995	11.9633	12.7078	17.9266	5.73312	6.91939	6.03229	3.85595	3.4303	4.13309	3.36774	noncoding	BQ302800	lincRNA-PRSS38	lincRNA	740	chr1	-	227890324	228285713	CACCATGAGGATGCGCATTTCTTTTTTGCCAAAAAGGCCCTTGAATGCGTGTCGAAGTTG	natural antisense	NM_001024228	ARF1	ADP-ribosylation factor 1	+	228270850	228286913	15.7493	6.22827	3.69677
ASHG19A3L0000085	0.00741043	5.78172	up	48.2723	113.196	57.8859	20.3995	11.9633	12.7078	17.9266	5.73312	6.91939	6.03229	3.85595	3.4303	4.13309	3.36774	noncoding	BQ302800	lincRNA-PRSS38	lincRNA	740	chr1	-	227890324	228285713	CACCATGAGGATGCGCATTTCTTTTTTGCCAAAAAGGCCCTTGAATGCGTGTCGAAGTTG	intron sense-overlapping	NM_023007	JMJD4	jmjC domain-containing protein 4 isoform 1	-	227918889	227923112	15.7493	6.22827	3.69677
ASHG19A3L0000085	0.00741043	5.78172	up	48.2723	113.196	57.8859	20.3995	11.9633	12.7078	17.9266	5.73312	6.91939	6.03229	3.85595	3.4303	4.13309	3.36774	noncoding	BQ302800	lincRNA-PRSS38	lincRNA	740	chr1	-	227890324	228285713	CACCATGAGGATGCGCATTTCTTTTTTGCCAAAAAGGCCCTTGAATGCGTGTCGAAGTTG	intronic antisense	NM_053052	SNAP47	synaptosomal-associated protein 47	+	227922696	227968932	15.7493	6.22827	3.69677
ASHG19A3L0000085	0.00741043	5.78172	up	48.2723	113.196	57.8859	20.3995	11.9633	12.7078	17.9266	5.73312	6.91939	6.03229	3.85595	3.4303	4.13309	3.36774	noncoding	BQ302800	lincRNA-PRSS38	lincRNA	740	chr1	-	227890324	228285713	CACCATGAGGATGCGCATTTCTTTTTTGCCAAAAAGGCCCTTGAATGCGTGTCGAAGTTG	natural antisense	NM_001658	ARF1	ADP-ribosylation factor 1	+	228270360	228286913	15.7493	6.22827	3.69677
ASHG19A3L0000085	0.00741043	5.78172	up	48.2723	113.196	57.8859	20.3995	11.9633	12.7078	17.9266	5.73312	6.91939	6.03229	3.85595	3.4303	4.13309	3.36774	noncoding	BQ302800	lincRNA-PRSS38	lincRNA	740	chr1	-	227890324	228285713	CACCATGAGGATGCGCATTTCTTTTTTGCCAAAAAGGCCCTTGAATGCGTGTCGAAGTTG	intronic antisense	NM_033131	WNT3A	protein Wnt-3a precursor	+	228194722	228248972	15.7493	6.22827	3.69677
ASHG19A3L0000085	0.00741043	5.78172	up	48.2723	113.196	57.8859	20.3995	11.9633	12.7078	17.9266	5.73312	6.91939	6.03229	3.85595	3.4303	4.13309	3.36774	noncoding	BQ302800	lincRNA-PRSS38	lincRNA	740	chr1	-	227890324	228285713	CACCATGAGGATGCGCATTTCTTTTTTGCCAAAAAGGCCCTTGAATGCGTGTCGAAGTTG	intronic antisense	NM_183062	PRSS38	serine protease 38 precursor	+	228003417	228034171	15.7493	6.22827	3.69677
ASHG19A3A032463	0.00018903	22.0357	up	890.725	900.291	1063.49	35.2821	44.1609	50.8641	50.6263	9.69434	9.72179	9.99435	5.45288	5.56764	4.96796	5.37842	noncoding	ENST00000399411	AC006465.4	Ensembl	1150	chr7	-	7948930	7950080	CGTGGCCAAAAATGTGCTGAAAGTAAATGAAAACTTAACTAAATTCATCGCCATCAAGAA	intergenic							45.2334	9.80349	5.34172
ASHG19A3A040192	0.000111145	5.50824	up	7314.69	6781.65	6964.72	979.203	1075.05	1214.28	1059.09	12.6465	12.5633	12.6314	10.0663	10.3471	10.0103	10.1849	noncoding	ENST00000414193	RP1-164F3.8	Ensembl	469	chrX	-	100698685	100699154	GGGTGGTGACTTCACATGCCTTAATAGTTGATGGCAATTCCAACTATGGGGAGAAATTTG	intergenic							1081.91	12.6137	10.1521
ASHG19A3A041423	0.00310208	2.28105	up	975.514	925.949	937.026	314.937	431.145	438.386	400.911	9.82876	9.75625	9.82223	8.57699	8.80256	8.26785	8.80347	noncoding	ENST00000449911	CTD-2230M5.2	Ensembl	585	chrX	+	113625126	113625711	TTGTGAAGAGAGCATTTATGACCAGGTGGTGGAAGATCTAAATTCCAGAGAACAGGAGAC	intergenic							396.345	9.80241	8.61272
ASHG19A3A008082	1.26945e-05	5.73178	up	3351.66	3309.92	3379.24	529.704	483.433	500.852	573.605	11.5553	11.5396	11.6262	9.13781	9.01452	9.07885	8.98769	noncoding	CR595169		RNAdb	1493	chr1	-	173833394	173836186	GAAACAGTAGTTGGGAAATCTTTTAGAAATCCACCTATTACTACCTATTGGTAAAGGAGA	intergenic							521.899	11.5737	9.05472
ASHG19A3A022402	0.00116784	4.77908	up	5926.64	5653.43	6524.76	817.439	1109.72	1225.85	1209.71	12.3615	12.3125	12.5436	10.2673	10.3609	9.7384	10.23	noncoding	ENST00000427353	AC115283.1	Ensembl	400	chr3	+	31310498	31310898	CAAATGTGTAACAATTAGACCAAAAGGCATCCAGCTAGCACGTGGAGAACGTAATTAAGA	intergenic							1090.68	12.4059	10.1492
ASHG19A3A008480	0.000290613	3.14479	up	256.841	294.396	257.368	97.8406	93.0331	84.1094	101.277	8.03145	8.20546	8.06736	6.48709	6.3098	6.50089	6.49604	noncoding	uc002ilc.1	CR602880	UCSC_knowngene	2080	chr17	-	45132466	45177627	TGTGTTTTCTGAAATACAGTCCCGCAGAGGGCAGTCTTGGGAAATTACTGTTCTCACACA	intergenic							94.0649	8.10142	6.44846
ASHG19A3L0000166	0.00129442	2.27115	up	109.807	104.079	108.546	66.0481	50.7678	57.6169	51.3076	6.88178	6.80574	6.90136	5.47167	5.75219	5.90868	5.58562	noncoding	DN918055	lincRNA-SGIP1	lincRNA	399	chr1	+	66890612	67423817	TTCATGAACTTCTCAGCCTTTATGGTTATGGTAGTACTGTTCGACTACCTGAAGAAGATG	intronic antisense	NM_207014	WDR78	WD repeat-containing protein 78 isoform 2	-	67303281	67390570	56.4351	6.86296	5.67954
ASHG19A3L0000166	0.00129442	2.27115	up	109.807	104.079	108.546	66.0481	50.7678	57.6169	51.3076	6.88178	6.80574	6.90136	5.47167	5.75219	5.90868	5.58562	noncoding	DN918055	lincRNA-SGIP1	lincRNA	399	chr1	+	66890612	67423817	TTCATGAACTTCTCAGCCTTTATGGTTATGGTAGTACTGTTCGACTACCTGAAGAAGATG	exon sense-overlapping	NM_001077704	MIER1	mesoderm induction early response protein 1	+	67395925	67454302	56.4351	6.86296	5.67954
ASHG19A3L0000166	0.00129442	2.27115	up	109.807	104.079	108.546	66.0481	50.7678	57.6169	51.3076	6.88178	6.80574	6.90136	5.47167	5.75219	5.90868	5.58562	noncoding	DN918055	lincRNA-SGIP1	lincRNA	399	chr1	+	66890612	67423817	TTCATGAACTTCTCAGCCTTTATGGTTATGGTAGTACTGTTCGACTACCTGAAGAAGATG	intronic antisense	NM_024763	WDR78	WD repeat-containing protein 78 isoform 1	-	67278571	67390570	56.4351	6.86296	5.67954
ASHG19A3L0000166	0.00129442	2.27115	up	109.807	104.079	108.546	66.0481	50.7678	57.6169	51.3076	6.88178	6.80574	6.90136	5.47167	5.75219	5.90868	5.58562	noncoding	DN918055	lincRNA-SGIP1	lincRNA	399	chr1	+	66890612	67423817	TTCATGAACTTCTCAGCCTTTATGGTTATGGTAGTACTGTTCGACTACCTGAAGAAGATG	exon sense-overlapping	NM_001146111	MIER1	mesoderm induction early response protein 1	+	67390577	67454302	56.4351	6.86296	5.67954
ASHG19A3L0000166	0.00129442	2.27115	up	109.807	104.079	108.546	66.0481	50.7678	57.6169	51.3076	6.88178	6.80574	6.90136	5.47167	5.75219	5.90868	5.58562	noncoding	DN918055	lincRNA-SGIP1	lincRNA	399	chr1	+	66890612	67423817	TTCATGAACTTCTCAGCCTTTATGGTTATGGTAGTACTGTTCGACTACCTGAAGAAGATG	exon sense-overlapping	NM_001146110	MIER1	mesoderm induction early response protein 1	+	67390577	67454302	56.4351	6.86296	5.67954
ASHG19A3L0000166	0.00129442	2.27115	up	109.807	104.079	108.546	66.0481	50.7678	57.6169	51.3076	6.88178	6.80574	6.90136	5.47167	5.75219	5.90868	5.58562	noncoding	DN918055	lincRNA-SGIP1	lincRNA	399	chr1	+	66890612	67423817	TTCATGAACTTCTCAGCCTTTATGGTTATGGTAGTACTGTTCGACTACCTGAAGAAGATG	intron sense-overlapping	NM_152665	TCTEX1D1	tctex1 domain-containing protein 1	+	67218139	67244730	56.4351	6.86296	5.67954
ASHG19A3L0000166	0.00129442	2.27115	up	109.807	104.079	108.546	66.0481	50.7678	57.6169	51.3076	6.88178	6.80574	6.90136	5.47167	5.75219	5.90868	5.58562	noncoding	DN918055	lincRNA-SGIP1	lincRNA	399	chr1	+	66890612	67423817	TTCATGAACTTCTCAGCCTTTATGGTTATGGTAGTACTGTTCGACTACCTGAAGAAGATG	exon sense-overlapping	NM_001146113	MIER1	mesoderm induction early response protein 1	+	67390577	67454302	56.4351	6.86296	5.67954
ASHG19A3L0000166	0.00129442	2.27115	up	109.807	104.079	108.546	66.0481	50.7678	57.6169	51.3076	6.88178	6.80574	6.90136	5.47167	5.75219	5.90868	5.58562	noncoding	DN918055	lincRNA-SGIP1	lincRNA	399	chr1	+	66890612	67423817	TTCATGAACTTCTCAGCCTTTATGGTTATGGTAGTACTGTTCGACTACCTGAAGAAGATG	exon sense-overlapping	NM_020948	MIER1	mesoderm induction early response protein 1	+	67390577	67454302	56.4351	6.86296	5.67954
ASHG19A3L0000166	0.00129442	2.27115	up	109.807	104.079	108.546	66.0481	50.7678	57.6169	51.3076	6.88178	6.80574	6.90136	5.47167	5.75219	5.90868	5.58562	noncoding	DN918055	lincRNA-SGIP1	lincRNA	399	chr1	+	66890612	67423817	TTCATGAACTTCTCAGCCTTTATGGTTATGGTAGTACTGTTCGACTACCTGAAGAAGATG	exon sense-overlapping	NM_001077701	MIER1	mesoderm induction early response protein 1	+	67395925	67454302	56.4351	6.86296	5.67954
ASHG19A3L0000166	0.00129442	2.27115	up	109.807	104.079	108.546	66.0481	50.7678	57.6169	51.3076	6.88178	6.80574	6.90136	5.47167	5.75219	5.90868	5.58562	noncoding	DN918055	lincRNA-SGIP1	lincRNA	399	chr1	+	66890612	67423817	TTCATGAACTTCTCAGCCTTTATGGTTATGGTAGTACTGTTCGACTACCTGAAGAAGATG	exon sense-overlapping	NM_001146112	MIER1	mesoderm induction early response protein 1	+	67390577	67454302	56.4351	6.86296	5.67954
ASHG19A3L0000166	0.00129442	2.27115	up	109.807	104.079	108.546	66.0481	50.7678	57.6169	51.3076	6.88178	6.80574	6.90136	5.47167	5.75219	5.90868	5.58562	noncoding	DN918055	lincRNA-SGIP1	lincRNA	399	chr1	+	66890612	67423817	TTCATGAACTTCTCAGCCTTTATGGTTATGGTAGTACTGTTCGACTACCTGAAGAAGATG	exon sense-overlapping	NM_001077700	MIER1	mesoderm induction early response protein 1	+	67390577	67454302	56.4351	6.86296	5.67954
ASHG19A3L0000166	0.00129442	2.27115	up	109.807	104.079	108.546	66.0481	50.7678	57.6169	51.3076	6.88178	6.80574	6.90136	5.47167	5.75219	5.90868	5.58562	noncoding	DN918055	lincRNA-SGIP1	lincRNA	399	chr1	+	66890612	67423817	TTCATGAACTTCTCAGCCTTTATGGTTATGGTAGTACTGTTCGACTACCTGAAGAAGATG	intronic antisense	NM_005478	INSL5	insulin-like peptide INSL5 precursor	-	67263423	67266942	56.4351	6.86296	5.67954
ASHG19A3L0000166	0.00129442	2.27115	up	109.807	104.079	108.546	66.0481	50.7678	57.6169	51.3076	6.88178	6.80574	6.90136	5.47167	5.75219	5.90868	5.58562	noncoding	DN918055	lincRNA-SGIP1	lincRNA	399	chr1	+	66890612	67423817	TTCATGAACTTCTCAGCCTTTATGGTTATGGTAGTACTGTTCGACTACCTGAAGAAGATG	exon sense-overlapping	NM_001077703	MIER1	mesoderm induction early response protein 1	+	67390577	67454302	56.4351	6.86296	5.67954
ASHG19A3L0000166	0.00129442	2.27115	up	109.807	104.079	108.546	66.0481	50.7678	57.6169	51.3076	6.88178	6.80574	6.90136	5.47167	5.75219	5.90868	5.58562	noncoding	DN918055	lincRNA-SGIP1	lincRNA	399	chr1	+	66890612	67423817	TTCATGAACTTCTCAGCCTTTATGGTTATGGTAGTACTGTTCGACTACCTGAAGAAGATG	intron sense-overlapping	NM_032291	SGIP1	SH3-containing GRB2-like protein 3-interacting	+	66999824	67210768	56.4351	6.86296	5.67954
ASHG19A3L0000166	0.00129442	2.27115	up	109.807	104.079	108.546	66.0481	50.7678	57.6169	51.3076	6.88178	6.80574	6.90136	5.47167	5.75219	5.90868	5.58562	noncoding	DN918055	lincRNA-SGIP1	lincRNA	399	chr1	+	66890612	67423817	TTCATGAACTTCTCAGCCTTTATGGTTATGGTAGTACTGTTCGACTACCTGAAGAAGATG	exon sense-overlapping	NM_001077702	MIER1	mesoderm induction early response protein 1	+	67390577	67454302	56.4351	6.86296	5.67954
ASHG19A3A028830	1.29121e-05	20.6512	up	1447.52	1457.01	1404.65	61.2042	69.197	76.1932	72.6052	10.3609	10.3734	10.3805	5.99199	6.16704	5.7972	6.05763	noncoding	AK131003		misc_RNA	689	chr5	+	134973225	134973914	ATTCCTGGCATCAGAAAAGCCCAAATCTAGATCAAGAATGAGTATGTTTTTCATCACTTA	intergenic							69.7999	10.3716	6.00346
ASHG19A3A050352	0.00163415	6.38486	up	134.069	120.464	136.937	22.0887	19.9261	35.6092	24.0605	7.15341	7.00284	7.21687	4.31947	5.03491	4.25417	4.19034	noncoding	ENST00000426437	RP11-49F20.1	Ensembl	1006	chr13	+	83397265	83398271	CCAGGTTGATTATATGGGACCAGATTCCTTTGACATCAAGAGGACACGTGACACTTACCT	intergenic							25.4211	7.12438	4.44972
ASHG19A3A041084	0.000134079	3.34638	up	5605.45	5677.49	5586.03	1342.92	1318.92	1412.57	1646.78	12.2821	12.3185	12.3364	10.7282	10.5703	10.4888	10.4917	noncoding	ENST00000455793	RP11-3D23.1	Ensembl	1077	chrX	+	61998719	61999796	GGATGCTTGTTGAAATTTTCGGGTGATTTACACATACTTTTCTCAAGTCATGGTGAAATA	intergenic							1430.3	12.3123	10.5697
ASHG19A3L0002457	5.79679e-06	2.51887	up	873.741	869.932	863.127	328.593	324.61	319.43	352.035	9.67225	9.67713	9.71613	8.38006	8.32845	8.33454	8.37986	noncoding	AW086055	lincRNA-PRRC2C	lincRNA	378	chr1	-	171562278	171562866	CAGGTTCTGCAGTCATCTGAATAAAATTATAGAGACATCCAGCACACTCCATTTAAAAAA	natural antisense	NM_015172	PRRC2C	protein PRRC2C	+	171454665	171562650	331.167	9.6885	8.35573
ASHG19A3A036505	0.0255327	8.67396	up	81.0072	85.7023	1058.89	25.0445	35.9329	22.6268	24.0566	6.47006	6.53661	9.98631	4.31896	4.35295	4.44865	5.06998	noncoding	AK056779		misc_RNA	1969	chr8	+	30044816	30047775	TAATTCTCATGTAGACCTGCTGTTTTAACACAAGAGGGCACCAGTAGACAGGATAGTCCC	intergenic							26.9152	7.66433	4.54764
ASHG19A3A008477	6.82172e-06	4.59741	up	3006.75	2882.17	2794.78	592.973	517.09	532.308	604.718	11.3959	11.3371	11.3589	9.20948	9.09958	9.2439	9.09958	noncoding	uc010wkm.1	CR624169	UCSC_knowngene	416	chr17	-	45128651	45129168	ATGCCAAGATGAGTTTGTCAGTATAGCCATATCCTGGAACTTATTTTGTGAGCTAAAAAA	intergenic							561.772	11.364	9.16313
ASHG19A3L0001125	1.97697e-05	9.72023	up	3232.03	3263.65	3320.96	314.916	279.7	295.165	355.268	11.5025	11.5187	11.6011	8.39405	8.21232	8.26772	8.16501	noncoding	BX952962	lincRNA-OBFC2A-2	lincRNA	428	chr2	-	192564056	192564732	CTCTGGTTTTCAAAGGTAATATGGAATATTTGACACTTGGTAAAAGGTGAACTACCTTTG	intergenic							311.262	11.5408	8.25977
ASHG19A3A041103	0.00265668	3.25704	up	1696.73	1610.7	1592.32	321.45	487.018	506.023	541.819	10.5767	10.5125	10.5545	9.04561	9.03058	8.29921	9.00196	noncoding	ENST00000430422	RP11-314A15.1	Ensembl	1160	chrX	+	65014186	65015677	GGAAATGGGAGCTGTAGAGTCTAATAGTCTATGAAAATCTGGATATAATGAGATATGTTC	intergenic							464.077	10.5479	8.84434
ASHG19A3A046944	0.0265067	2.45538	up	29.5966	24.7068	26.3089	7.83747	18.2444	16.0464	20.5674	5.05038	4.87187	4.94654	4.06817	3.81373	2.7083	4.05108	noncoding	ENST00000426952	RP5-817C23.1	Ensembl	862	chr1	-	68125836	68126698	ACTGAATGTGGGGGTGACCAACTGTAGATAATCAAGGATGATGAAAAAGAGGCTGAGAGA	intergenic							15.6739	4.95626	3.66032
ASHG19A3A018873	0.000126747	2.00861	up	3904.9	3826.27	3741.54	1675.14	1605.79	1633.67	1548.39	11.7628	11.7389	11.7684	10.6387	10.7781	10.8083	10.777	noncoding	ENST00000423089	AP001434.1	Ensembl	438	chr21	-	39610148	39610586	ATCAAGCCTGCTCAATGCTCATCATGGATCCCTGTGAATTACGAAAACTGCTACATCCGT	intergenic							1615.75	11.7567	10.7505
ASHG19A3L0002222	0.00459761	2.00284	up	102.489	115.24	104.293	75.1033	68.0812	56.1347	54.8726	6.79403	6.94213	6.8436	5.57615	5.7165	6.10556	6.03327	noncoding	AK021739	lincRNA-JAK2-2	lincRNA	1879	chr9	+	4860453	4885917	GTTCCCATTTGCCAGAGCTCATTTATTGTCCTGAAGGTCTGTGAAAAGATGACAAAGTCG	exon sense-overlapping	NM_005772	RCL1	RNA 3'-terminal phosphate cyclase-like protein	+	4792833	4861064	63.548	6.85992	5.85787
ASHG19A3A030765	0.000263132	2.20936	up	219.345	234.535	210.203	102.431	112.388	107.286	121.001	7.82122	7.90571	7.79594	6.7661	6.67624	6.56879	6.77817	noncoding	AK097171		misc_RNA	2511	chr6	-	160043563	160045633	ACATTCCCCTGGGTAAATAGATAGAAGAGATTTGTGCAAATGCAAGAGAAATTTCAGTGT	intergenic							110.776	7.84096	6.69733
ASHG19A3L0001791	0.00777014	3.17656	up	40.1336	98.2535	32.1776	12.8959	17.4219	28.7348	26.5241	5.47149	6.73092	5.22055	4.46672	4.71343	3.40136	3.97924	noncoding	chr6:34524172-34539872+	lincRNA-C6orf106	lincRNA	15701	chr6	+	34524172	34539872	AGAAAAATGGAGGCAGGGCAGGGGCTGTGCAGTAGCAGAACTGATTGGCCTGCTTGACCA	bidirectional	NM_012391	SPDEF	SAM pointed domain-containing Ets transcription	-	34505579	34524091	21.3942	5.80765	4.14019
ASHG19A3L0000209	7.89963e-05	3.81511	up	2395.43	2506.41	2541.86	623.169	513.273	573.789	619.479	11.0813	11.1469	11.2217	9.2487	9.21714	9.31803	9.08909	noncoding	AK097728	lincRNA-PRLHR-1	lincRNA	1798	chr10	-	120433633	120514558	CTCAGGAGCTCTGTCACAAAGCTGTTCATGGAAGAGGATGTTGGACTTCTTACTTGCTTT	exon sense-overlapping	NM_153810	C10orf46	chromosome 10 open reading frame 46	-	120440493	120514758	582.428	11.15	9.21824
ASHG19A3A041412	0.00153992	2.12562	up	1806.49	1779.7	1899.81	805.197	638.871	776.022	835.655	10.6732	10.6552	10.8091	9.70435	9.67046	9.71314	9.41055	noncoding	ENST00000438679	RP5-1065P14.1	Ensembl	415	chr1	+	229177917	229178332	CAGTGAGTTTTTGTTCAATAACCCAAACATCAAAGGAACTTGTGGCTGTCGAGAAACCTT	intergenic							763.936	10.7125	9.62463
ASHG19A3L0000459	1.49807e-05	5.13586	up	104.986	105.111	108.659	24.2215	25.4788	25.0318	27.136	6.82302	6.81881	6.90296	4.499	4.50576	4.39614	4.54973	noncoding	AA666059	lincRNA-ERC1	lincRNA	395	chr12	-	1650285	1650679	GTTAATGTTAACAACATTTTACCCCATATTTTCCAGTGCCAAGGCAGTGAAACAGGAAAG	intergenic							25.467	6.84826	4.48766
ASHG19A3A020212	0.00575543	2.21717	up	87.3041	90.3662	99.2914	45.5953	43.4265	63.2531	49.2447	6.56808	6.61332	6.77522	5.40969	5.89648	5.3546	5.3532	noncoding	ENST00000439492	AP000350.6	Ensembl	1763	chr22	+	24269086	24271761	TGAACATTCCTGATGAGACAATATTGACTCCACTTCTTACTTGGGTCTGTCATGATTTGG	intergenic							50.3799	6.65221	5.50349
ASHG19A3L0000866	0.0218727	2.35214	up	57.788	55.5166	43.8474	33.2483	33.3531	24.9412	21.9659	5.98648	5.94716	5.64943	4.17709	4.50057	4.87579	4.95476	noncoding	DA330000	lincRNA-CBLN1-2	lincRNA	417	chr16	+	48705761	48706178	AAGGTATAGTTTGGCCAAGACCCGGGAAAACCAAAATTCTACCCATTCTTTCTGAGTGTG	intergenic							28.3771	5.86102	4.62705
ASHG19A3A026010	0.000125633	2.25124	up	12310.2	10751.2	10303	4161.44	3746.58	3974.75	4280.87	13.3783	13.2071	13.1842	12.1174	12.0726	12.1382	12.0152	noncoding	AK090904		RNAdb	2547	chr4	+	128759331	128761879	GCATCTTTATGCTAGTGAACAAAGTAGCAATAAATGTTCATTTTTGGATGGCAGTACACA	intergenic							4040.91	13.2566	12.0858
ASHG19A3A030996	2.39762e-05	3.64094	up	27947.6	27057.8	27198.9	6371.62	5676.94	5450.65	6346.57	14.524	14.5019	14.5562	12.7005	12.5381	12.7733	12.6402	noncoding	ENST00000405924	RP3-451B15.3	Ensembl	140	chr6	+	12319684	12319824	AACAGACACACCCTCACAGTTGGAAATGGAGGATGAAGATACAATTGATGTGCTCCAGCA	intergenic							5961.44	14.5273	12.663
ASHG19A3L0002417	0.000761834	2.76198	up	180.161	173.325	160.904	58.077	67.6458	82.4038	77.9	7.55541	7.50003	7.43258	6.10139	6.27987	5.71591	6.02405	noncoding	BE048920	lincRNA-FBXL4	lincRNA	329	chr6	+	99293092	99293421	AAGTGGGGCCAGGGGCCGGGAGGTTGGGCGGGGTCTATGGTTTGTATGTGTTGGGTGGCG	intergenic							71.5066	7.49601	6.0303
ASHG19A3A028650	3.92335e-05	3.3145	up	26191.3	23449	22065.3	5880.71	5361.62	5716.31	5928.46	14.4248	14.3017	14.2637	12.5953	12.6129	12.6499	12.547	noncoding	ENST00000502314	CCT5P1	Ensembl	1618	chr5	+	114847773	114849391	CAAATGGTTAGAATGATTTTGAAGATTGACGACATTCATAAGCCTGGAGAATCTGAAGAA	intergenic							5721.77	14.3301	12.6013
ASHG19A3L0001434	0.0233307	3.08239	up	27.7763	19.4284	39.1836	14.1583	11.5361	18.3192	7.84356	4.96016	4.57112	5.49557	2.64559	4.0245	3.55726	3.31223	noncoding	BQ922369	lincRNA-CLNK-2	lincRNA	853	chr4	-	10971582	10972252	TTACTGAGAAAAAGGGACGAGAGAGAGATGTGGGATCAGAGATCGCTTCAAAAAACCTAG	intergenic							12.9643	5.00895	3.3849
ASHG19A3A033570	0.00107066	2.04833	up	336.28	349.402	324.677	171.007	147.466	172.123	209.419	8.40469	8.44284	8.39055	7.59645	7.3883	7.33923	7.18901	noncoding	AK024938		NRED	1864	chr7	-	132384193	132644331	ACGTGCCAACTGGGCTTTTCATTTTCAAAAGTTTATTGAAGAAAGAAAATTGAGGGCTGG	intron sense-overlapping	NM_017812	CHCHD3	coiled-coil-helix-coiled-coil-helix	-	132469622	132766828	175.004	8.41269	7.37825
ASHG19A3A046515	0.0079912	7.82862	up	91.3425	80.172	81.4438	22.0522	19.6111	13.0971	5.14935	6.62887	6.44684	6.50655	2.34267	3.47825	4.25112	4.16261	noncoding	ENST00000422198	RP11-145M4.1	Ensembl	171	chr1	-	59520068	59521721	ACTCAATGCAACTATAACAATGAGGGAAATGTCTTGGCAGCTCTTGAAATCCATGGAAGA	intergenic							14.9774	6.52742	3.55866
ASHG19A3L0001441	0.00328796	2.34362	up	34.2142	37.4317	29.1347	15.4238	18.7199	25.1012	17.3337	5.25475	5.42283	5.08746	3.79996	4.51	3.69655	4.0986	noncoding	BU686812	lincRNA-PAPSS1	lincRNA	642	chr4	+	108304064	108552960	TGCAACTCGAAAGGGAACTATTTCCAAAGTGATTAAACCAGGGGCCATCGTCAGCACTTT	natural antisense	NM_005443	PAPSS1	bifunctional 3'-phosphoadenosine	-	108534821	108641419	19.1447	5.25502	4.02628
ASHG19A3L0000325	0.000509465	4.95114	up	1189.83	1119.17	1098.52	229.011	239.546	238.155	180.475	10.0892	10.0096	10.04	7.36749	7.88077	7.78209	7.92378	noncoding	AK302893	lincRNA-MICAL2-1	lincRNA	3585	chr11	+	12115542	12284466	CCTTGATCATGAAACAATACCATGAGGGGGCCTCTGTCACCTTTGAAAAGAACACTTTTT	exon sense-overlapping	NM_014632	MICAL2	protein MICAL-2	+	12132137	12285331	221.797	10.0463	7.73853
ASHG19A3A049079	9.8063e-06	3.81114	up	7153.23	7077.31	6773.53	1619.17	1446.82	1479.26	1603.52	12.6099	12.6151	12.5953	10.6827	10.6317	10.7566	10.6353	noncoding	NR_027345	NCRNA00173	RefSeq_NR	1597	chr12	+	116971226	116973326	TTATGTCCTGTGTAGCAGCAGGTAGTGTGGCTTTGAGAAAATAAAATGGCCACCTTGCTC	intergenic							1537.19	12.6068	10.6766
ASHG19A3L0001569	0.000458171	2.34059	up	92.5776	95.7954	86.2504	53.0549	42.6158	46.9721	46.1536	6.64983	6.69633	6.58847	5.313	5.45116	5.58385	5.324	noncoding	BX483760	lincRNA-SEMA6A-4	lincRNA	683	chr5	+	115659166	115660890	CTAAAGAGAGACAACAAAATTGAGCACTCTGCAATGTGAAATTCACCATGTCTGAGTATC	intergenic							47.1991	6.64488	5.418
ASHG19A3A014897	0.00062174	4.60284	up	25253	24300.1	28574.8	4160.99	4112.55	5158.47	4736.14	14.3799	14.3455	14.6387	12.2594	12.4556	12.1379	12.1557	noncoding	ENST00000396848	AC010138.3	Ensembl	867	chr2	-	204637353	204638225	ATCCTTCAAAAAACAAGAAAAAACTCCCAAAACACCAAAAGGACCTAGTTCTGTAGAAGA	intergenic							4542.04	14.4547	12.2522
ASHG19A3A019635	0.000290746	5.88572	up	216.122	194.143	223.811	46.9828	33.036	43.6401	42.5281	7.80158	7.65104	7.87458	5.19375	5.33978	5.399	4.94154	noncoding	ENST00000444114	RP5-1172A22.1	Ensembl	637	chr22	-	27617309	27620688	GACCTTCATCACTGTGAACAGTGATGCAGTGGCTTTATAAACTCTAGAATGTGCTACAAT	intergenic							41.5467	7.77574	5.21852
ASHG19A3A039974	0.000261345	3.78739	up	366.696	324.484	311.334	97.1408	88.9565	104.328	93.2204	8.52103	8.34406	8.33334	6.36359	6.63372	6.49163	6.42415	noncoding	ENST00000440184	RP13-34C21.1	Ensembl	427	chrX	-	62519125	62519552	ATTGGAGCTACAGACTCCAGTGGAGAGGTCATGTTCCTGATGAAATGGAAAAACTCATGA	intergenic							95.9114	8.39948	6.47827
ASHG19A3L0000373	7.36023e-05	2.90707	up	20302.5	19927.7	18277.7	5597.48	5050.34	5556.23	5310.65	14.0713	14.0776	13.9927	12.424	12.572	12.5835	12.451	noncoding	EC464921	lincRNA-LRRC4C-5	lincRNA	89	chr11	+	37649926	37649992	GTACTGATAGAAATCTCTAGTGATAATCATAACACTCTCGGTCACATTCGTTTTTCCTTC	intergenic							5378.68	14.0472	12.5076
ASHG19A3A040155	7.85564e-07	9.01342	up	2477.71	2434.37	2434.63	257.038	246.577	257.255	257.683	11.1296	11.1097	11.1603	7.91505	7.99664	7.9621	7.97085	noncoding	ENST00000419829	RP11-465C5.1	Ensembl	959	chrX	-	93891664	93894569	TATAGATAGTCCAGGACAAGTCCTCCTACAGTCCAAGGACCAGATTATAGCTGGAAATGC	intergenic							254.638	11.1332	7.96116
ASHG19A3A044020	0.000342192	4.03756	up	322.603	331.904	344.914	77.6569	86.8953	98.0458	99.1526	8.34535	8.3767	8.47708	6.45526	6.54154	6.15828	6.38983	noncoding	ENST00000433152	RP11-222A11.1	Ensembl	744	chr10	+	67345445	67441220	GAGAACTACTCAAGAGAACAAAACCACCAGCAATATCCACCTGTATTTGTCTTTTCATAA	intergenic							90.4377	8.39971	6.38623
ASHG19A3A042807	0.00854144	4.18107	up	308.387	290.213	232.534	90.0202	86.3289	74.7357	47.5007	8.28049	8.1882	7.92343	5.35906	6.14216	6.38453	6.38156	noncoding	ENST00000443523	RP11-556E13.1	Ensembl	369	chr10	-	54316742	54515169	TGTATTCTGGGATCAAACCACCTGGCTGGAGATGCTTACTAACCTCAGTTTCTTCATCTG	intergenic							74.6464	8.1307	6.06683
ASHG19A3A047792	7.37665e-05	13.3933	up	4571.03	4164.42	3741.15	320.899	290.744	254.226	281.695	11.9946	11.8753	11.7677	8.04938	7.97956	8.29741	8.21669	noncoding	BC017416		misc_RNA	1439	chr12	-	68820110	68821517	GCAGGGCTTTGTCTCATTCCTTTTTGGAACAAGCACAAAGTAGATGCTCAATGAATTTAT	intergenic							286.891	11.8792	8.13576
ASHG19A3L0003403	1.69355e-05	2.37725	up	6438.54	6106.47	6121.77	2234.3	2066.08	2134.13	2384.64	12.4721	12.4252	12.4596	11.2717	11.1675	11.2296	11.1432	noncoding	AK128058	lincRNA-ZNF532	lincRNA	6183	chr18	+	56529831	56653197	TGAAACACATTTCATATGTAAATAAACGTGGGACATTTGGCCCTTGTGCTTCTGTGAGAG	exon sense-overlapping	NM_018181	ZNF532	zinc finger protein 532	+	56530060	56653709	2204.79	12.4523	11.203
ASHG19A3A031238	0.00182015	2.14118	up	91.686	84.6664	75.3145	51.7721	46.0847	41.3313	49.5839	6.63467	6.51909	6.3947	5.41909	5.25728	5.54965	5.44496	noncoding	ENST00000482052	HLA-L	Ensembl	1765	chr6	+	30227360	30260791	GCAATGCCCAAAGTCATCCTTGGTCACAATAAAGGAGAATAAAGGGAAAAAAGTATGATT	intergenic							47.193	6.51615	5.41774
ASHG19A3L0000398	0.000748327	2.43968	up	160.306	169.886	158.935	83.7004	75.5892	64.357	82.1155	7.39714	7.47036	7.4159	6.18018	5.92276	6.27448	6.18701	noncoding	CU444927	lincRNA-MYEOV-2	lincRNA	742	chr11	-	69059868	69182303	ACAGAGGCTTTAAATGCTTTAAACCAGGAATCTCCAAACTTCTTTTGCTGTCTTCCATTA	intronic antisense	NM_138768	MYEOV	hypothetical protein LOC26579	+	69061621	69064754	76.4405	7.4278	6.14111
ASHG19A3A029835	0.00381426	2.00871	up	30.5402	30.0574	30.1148	16.5872	22.0894	18.4688	23.1658	5.09211	5.12846	5.13261	4.26064	4.03581	3.8107	4.33867	noncoding	uc003olu.2	BC042825	UCSC_knowngene	1098	chr6	-	36125845	36163947	AGAGGGTTATACTGTGAAGAAGAATGAAAAAGCCAAACATTTCATTCAGGTAAGCATATC	bidirectional	NM_015695	BRPF3	bromodomain and PHD finger-containing protein 3	+	36164549	36200567	20.0778	5.11773	4.11146
ASHG19A3A008347	4.81237e-05	4.57527	up	377.516	342.291	319.069	81.3175	84.0847	76.2649	87.5434	8.56064	8.41886	8.36399	6.27179	6.16848	6.23227	6.34335	noncoding	AK095243		misc_RNA	2460	chr17	-	39805306	39807765	CTAGAGAGGGCTCGGAGGCCTTTATTTTGAAAAGAGTAATACTGAATAGATTCAAAATAA	intergenic							82.3026	8.44783	6.25397
ASHG19A3A050378	0.000121176	5.70755	up	285.008	276.71	273.925	49.0124	47.7798	56.2197	66.7943	8.16738	8.12836	8.15582	5.86936	5.71928	5.46342	5.49852	noncoding	NR_027350	MIR17HG	RefSeq_NR	5018	chr13	+	92000073	92006829	GGAAAGAAAGCACTTAACATTTTAGGAATTCTTTTTAAAGCTGCTTGCAAAGTGTTGGTG	intergenic							54.9515	8.15052	5.63765
ASHG19A3A019191	0.00789119	2.51672	up	50.7737	37.3962	43.1998	28.0578	25.4095	13.1845	26.9582	5.80427	5.42205	5.62976	4.49089	3.48868	4.62299	4.54604	noncoding	NR_027267	C21orf82	RefSeq_NR	673	chr21	+	35552977	35555545	TGGGTATGTGTGACATCAACAAGAAGCAGCAGACAAAACAAAATATTTTCACAAACATTC	intergenic							23.4025	5.61869	4.28715
ASHG19A3L0001458	1.1204e-06	10.3392	up	52358.3	47791.5	47386.5	3797.18	3719.01	3751.78	3867.71	15.409	15.3105	15.3554	11.9618	11.9862	11.9987	12.0062	noncoding	AK021484	lincRNA-SYNPO2	lincRNA	3422	chr4	+	119672345	119956974	TGAGAATTATCACATAGCCTAAATTCTAGCCTGGCAGCAAGAGTCACATCTGAGATGTCC	intron sense-overlapping	NM_001128934	SYNPO2	synaptopodin-2 isoform c	+	119809995	119959669	3783.92	15.3583	11.9882
ASHG19A3L0001458	1.1204e-06	10.3392	up	52358.3	47791.5	47386.5	3797.18	3719.01	3751.78	3867.71	15.409	15.3105	15.3554	11.9618	11.9862	11.9987	12.0062	noncoding	AK021484	lincRNA-SYNPO2	lincRNA	3422	chr4	+	119672345	119956974	TGAGAATTATCACATAGCCTAAATTCTAGCCTGGCAGCAAGAGTCACATCTGAGATGTCC	exon sense-overlapping	NM_001128933	SYNPO2	synaptopodin-2 isoform b	+	119809995	119959669	3783.92	15.3583	11.9882
ASHG19A3L0001458	1.1204e-06	10.3392	up	52358.3	47791.5	47386.5	3797.18	3719.01	3751.78	3867.71	15.409	15.3105	15.3554	11.9618	11.9862	11.9987	12.0062	noncoding	AK021484	lincRNA-SYNPO2	lincRNA	3422	chr4	+	119672345	119956974	TGAGAATTATCACATAGCCTAAATTCTAGCCTGGCAGCAAGAGTCACATCTGAGATGTCC	intron sense-overlapping	NM_133477	SYNPO2	synaptopodin-2 isoform a	+	119809995	119982402	3783.92	15.3583	11.9882
ASHG19A3L0001458	1.1204e-06	10.3392	up	52358.3	47791.5	47386.5	3797.18	3719.01	3751.78	3867.71	15.409	15.3105	15.3554	11.9618	11.9862	11.9987	12.0062	noncoding	AK021484	lincRNA-SYNPO2	lincRNA	3422	chr4	+	119672345	119956974	TGAGAATTATCACATAGCCTAAATTCTAGCCTGGCAGCAAGAGTCACATCTGAGATGTCC	intronic antisense	NM_014822	SEC24D	protein transport protein Sec24D	-	119643977	119757326	3783.92	15.3583	11.9882
ASHG19A3A024405	9.18752e-05	2.72156	up	36.4648	38.3485	35.9018	17.9783	15.9735	19.9265	17.8781	5.34143	5.45559	5.37329	3.85173	4.15299	3.93758	3.84037	noncoding	ENST00000514050	RP11-689K5.3	Ensembl	472	chr4	-	82523950	82965397	GAGAAGCCAATAGGCAAAGTAAGAATGAACCTACTTTTATCAGACACTATGATTCGAGCC	intergenic							17.9391	5.3901	3.94567
ASHG19A3A007394	0.000201343	2.0324	up	35.2085	42.8818	36.9365	26.039	22.8649	26.5006	21.8351	5.29655	5.60518	5.41264	4.16857	4.59102	4.50935	4.39082	noncoding	NR_026680	MGC57346	RefSeq_NR	2110	chr17	+	43697711	43715327	ACTTCTAGGCTTGGTTGAACCGTGCAGATACCTTCTCGAAACAAAAGATTTTCCTACCTG	intergenic							24.3099	5.43812	4.41494
ASHG19A3A039795	3.56372e-05	4.64059	up	23424	21002.8	21318.5	3970.09	3658.21	3866.67	3701.08	14.2716	14.1468	14.2103	11.906	12.0303	12.0662	11.9786	noncoding	ENST00000397222	RP4-774G10.1	Ensembl	778	chrX	-	45918185	45918963	TAAAATTGCTGATGTGGGACACTTAAAGTACTACTTGGCTCCCAAGATGGAGGATGAAGA	intergenic							3799.01	14.2096	11.9953
ASHG19A3A051787	0.00194942	2.67357	up	47.6915	44.5453	40.409	26.2479	19.3873	18.6172	21.5253	5.7167	5.65406	5.53692	4.1455	4.05023	4.52259	4.15018	noncoding	AF422192		misc_RNA	1422	chr14	+	101359264	101360646	GCCCTTGGTGGACAACCATTTTGCTCTCTAGCAAATGGATAGAAAAGTTTATGTGAGTCT	intergenic							21.4444	5.63589	4.21712
ASHG19A3L0000943	1.1102e-05	17.582	up	585.947	547.032	569.101	32.5724	34.65	31.1653	42.0637	9.1346	9.03955	9.13862	5.17584	4.83506	4.84578	5.01622	noncoding	BP312547	lincRNA-RBBP8-1	lincRNA	581	chr18	+	20494080	20548814	AAAGTTTTAGAAGATCGGTTAAGAGCAGGCTTATGTGATCGCTGTGCAGTAACTGAAGAA	exon sense-overlapping	NM_203291	RBBP8	DNA endonuclease RBBP8 isoform a	+	20513838	20606449	35.1128	9.10425	4.96822
ASHG19A3L0000943	1.1102e-05	17.582	up	585.947	547.032	569.101	32.5724	34.65	31.1653	42.0637	9.1346	9.03955	9.13862	5.17584	4.83506	4.84578	5.01622	noncoding	BP312547	lincRNA-RBBP8-1	lincRNA	581	chr18	+	20494080	20548814	AAAGTTTTAGAAGATCGGTTAAGAGCAGGCTTATGTGATCGCTGTGCAGTAACTGAAGAA	exon sense-overlapping	NM_002894	RBBP8	DNA endonuclease RBBP8 isoform a	+	20513294	20606449	35.1128	9.10425	4.96822
ASHG19A3L0000943	1.1102e-05	17.582	up	585.947	547.032	569.101	32.5724	34.65	31.1653	42.0637	9.1346	9.03955	9.13862	5.17584	4.83506	4.84578	5.01622	noncoding	BP312547	lincRNA-RBBP8-1	lincRNA	581	chr18	+	20494080	20548814	AAAGTTTTAGAAGATCGGTTAAGAGCAGGCTTATGTGATCGCTGTGCAGTAACTGAAGAA	exon sense-overlapping	NM_203292	RBBP8	DNA endonuclease RBBP8 isoform b	+	20513838	20606449	35.1128	9.10425	4.96822
ASHG19A3L0001684	3.24212e-05	6.99007	up	545.367	524.186	546.343	74.5748	77.3613	80.9523	92.7234	9.04087	8.98508	9.08441	6.35646	6.25494	6.09459	6.21994	noncoding	CF135687	lincRNA-LHFPL2	lincRNA	600	chr5	-	77806192	78065844	AAGTTGTTCATTAAGACTTCCCAGCATTCCTACAGATATAAATAGGTGAGGCCGCAGGCG	exon sense-overlapping	NM_005779	LHFPL2	lipoma HMGIC fusion partner-like 2 protein	-	77781037	77944648	81.4029	9.03679	6.23148
ASHG19A3L0000764	0.00183442	6.72044	up	76.4083	61.1812	75.7455	9.56857	18.7365	10.281	19.5207	6.38875	6.07697	6.40213	3.98528	3.11339	2.96448	4.09976	noncoding	DA697045	lincRNA-RGS6-2	lincRNA	565	chr14	+	72315325	72382763	AGAAATAGGGACCGGCTGCTTTGGAAGAAACATGCTAGGAAATGTGGACACAGAGAAACA	intergenic							14.5267	6.28928	3.54073
ASHG19A3A051791	0.0105588	3.1708	up	66.2985	53.56	50.5694	28.409	28.0939	18.7065	17.7446	6.18185	5.89715	5.84503	3.83685	4.05834	4.64165	4.70249	noncoding	ENST00000442197	AL132709.9	Ensembl	625	chr14	+	101427363	101433377	AAACTGATTTAAGCACGCTTCCATGGTCAGAAGCCTTATGGTTGCCACAGGGTATTAGGA	intergenic							23.2385	5.97468	4.30983
ASHG19A3L0003578	0.000777518	3.52805	up	53.9065	43.5761	44.3053	13.5404	17.7074	17.582	22.1481	5.89061	5.62338	5.66544	4.18918	3.95786	3.47825	4.00512	noncoding	chr1:200231279-200242758-	lincRNA-FAM58B-1	lincRNA	11480	chr1	-	200231279	200242758	TCCCCAGAGTTCAACAAGTGTTTATTTGTAACTAACATGAAAGATTATGGCCAGTGCACA	intergenic							17.7445	5.72647	3.9076
ASHG19A3A021365	0.010208	2.56786	up	589.741	472.095	498.006	263.611	217.295	200.24	152.426	9.14794	8.85075	8.96258	7.11607	7.61558	8.00102	7.77342	noncoding	ENST00000468320	MT-ND4L	Ensembl	276	chr3	-	106614575	106615255	GGTTTAGCCTTACTAGTTACAGTCTCCAACACCTTTGGCCTAGATTATGTACAAACCTAA	intergenic							208.393	8.98709	7.62652
ASHG19A3L0001591	0.00603206	2.44939	up	35.6562	65.2866	47.3651	22.8835	23.5943	25.4029	27.8088	5.31376	6.16704	5.75485	4.53893	4.52693	4.30977	4.43553	noncoding	AK293746	lincRNA-NDST1-2	lincRNA	3451	chr5	+	149877339	149933276	AAAGGATTTTGGTGCCAACTGCTTGAAGGAGGAAAAACCAAGTGTCTGGGCAAAAGCAAG	exon sense-overlapping	NM_001543	NDST1	bifunctional heparan sulfate	+	149887673	149937773	24.9224	5.74522	4.45279
ASHG19A3A025631	0.000292515	4.12654	up	279.042	229.125	217.9	62.4741	70.7422	52.4252	77.7277	8.13564	7.87535	7.8424	6.09751	5.61396	5.82775	6.08557	noncoding	NR_003133	LOC400759	RefSeq_NR	1234	chr1	+	89873237	89890493	TCACACAGCTAGTAAATGTATCAAAGCTGTCTTCATCACTTAGTGGAATCCACAATGATT	intergenic							65.8423	7.95113	5.9062
ASHG19A3L0003326	0.00014044	4.56474	up	694.582	617.208	723.368	158.943	131.988	150.804	161.937	9.36989	9.20888	9.46881	7.20241	7.18682	7.22508	7.02032	noncoding	AK097798	lincRNA-ZNF676	lincRNA	2091	chr19	-	22361892	23158666	CCTTTAAATGGCTGTCACACTTGATTGTAGGTAAGATAATATACTGGAGAAAACTACTAG	intronic antisense	NM_020855	ZNF492	zinc finger protein 492	+	22817125	22850472	150.918	9.34919	7.15866
ASHG19A3L0003326	0.00014044	4.56474	up	694.582	617.208	723.368	158.943	131.988	150.804	161.937	9.36989	9.20888	9.46881	7.20241	7.18682	7.22508	7.02032	noncoding	AK097798	lincRNA-ZNF676	lincRNA	2091	chr19	-	22361892	23158666	CCTTTAAATGGCTGTCACACTTGATTGTAGGTAAGATAATATACTGGAGAAAACTACTAG	exon sense-overlapping	NM_001001411	ZNF676	zinc finger protein 676	-	22361902	22379753	150.918	9.34919	7.15866
ASHG19A3L0003326	0.00014044	4.56474	up	694.582	617.208	723.368	158.943	131.988	150.804	161.937	9.36989	9.20888	9.46881	7.20241	7.18682	7.22508	7.02032	noncoding	AK097798	lincRNA-ZNF676	lincRNA	2091	chr19	-	22361892	23158666	CCTTTAAATGGCTGTCACACTTGATTGTAGGTAAGATAATATACTGGAGAAAACTACTAG	intron sense-overlapping	NM_001080409	ZNF99	zinc finger protein 99	-	22939006	22952784	150.918	9.34919	7.15866
ASHG19A3L0003326	0.00014044	4.56474	up	694.582	617.208	723.368	158.943	131.988	150.804	161.937	9.36989	9.20888	9.46881	7.20241	7.18682	7.22508	7.02032	noncoding	AK097798	lincRNA-ZNF676	lincRNA	2091	chr19	-	22361892	23158666	CCTTTAAATGGCTGTCACACTTGATTGTAGGTAAGATAATATACTGGAGAAAACTACTAG	exon sense-overlapping	NM_001098626	ZNF98	zinc finger protein 98	-	22573898	22605148	150.918	9.34919	7.15866
ASHG19A3A029895	0.000571939	6.79223	up	92.8023	96.0159	101.061	13.7533	18.2632	20.523	20.4292	6.65326	6.69923	6.79993	4.05763	4.20138	3.50271	4.05263	noncoding	ENST00000440194	RP11-328M4.2	Ensembl	196	chr6	-	41462590	41513981	CCGCTGAGAGCGAGAGAAAACCACGTGCACCAAACTTTAGGGGAGGAAAAATGGGAACGT	bidirectional	NM_001012427	FOXP4	forkhead box protein P4 isoform 3	+	41514163	41570122	18.2422	6.71747	3.95359
ASHG19A3A029895	0.000571939	6.79223	up	92.8023	96.0159	101.061	13.7533	18.2632	20.523	20.4292	6.65326	6.69923	6.79993	4.05763	4.20138	3.50271	4.05263	noncoding	ENST00000440194	RP11-328M4.2	Ensembl	196	chr6	-	41462590	41513981	CCGCTGAGAGCGAGAGAAAACCACGTGCACCAAACTTTAGGGGAGGAAAAATGGGAACGT	bidirectional	NM_138457	FOXP4	forkhead box protein P4 isoform 2	+	41514163	41570122	18.2422	6.71747	3.95359
ASHG19A3A029895	0.000571939	6.79223	up	92.8023	96.0159	101.061	13.7533	18.2632	20.523	20.4292	6.65326	6.69923	6.79993	4.05763	4.20138	3.50271	4.05263	noncoding	ENST00000440194	RP11-328M4.2	Ensembl	196	chr6	-	41462590	41513981	CCGCTGAGAGCGAGAGAAAACCACGTGCACCAAACTTTAGGGGAGGAAAAATGGGAACGT	bidirectional	NM_001012426	FOXP4	forkhead box protein P4 isoform 1	+	41514163	41570122	18.2422	6.71747	3.95359
ASHG19A3A000013	0.000271626	2.3094	up	69.2848	56.8824	60.1511	32.4329	30.6469	33.8223	36.3095	6.24588	5.98112	6.08319	4.9547	4.95586	4.83992	4.83305	noncoding	AK091713		NRED	1932	chr11	-	121959812	122051108	AATGGAAAGGAAGGAGAAAATGGAGTTCACTATCAGTAGCTTTTGCACTGGTCTGCCCTT	intron sense-overlapping	NM_001001786	BLID	BH3-like motif-containing cell death inducer	-	121986061	121986923	33.3029	6.1034	4.89588
ASHG19A3L0001824	0.000434124	3.74551	up	195.424	189.752	197.28	58.1936	49.3891	57.5738	74.6522	7.67112	7.61957	7.71276	6.03592	5.75101	5.71807	5.54562	noncoding	BX091318	lincRNA-SH3BGRL2	lincRNA	662	chr6	+	80256854	80257950	TTTCAATGATGAGACTCTGGAGTTCCCCTATGCATAGTTGAAAGCAGTGATTAGAAAAAA	intergenic							59.9522	7.66782	5.76266
ASHG19A3A051394	0.000223282	2.73695	up	90.3517	97.465	96.7609	48.8699	38.6718	38.1527	42.0806	6.61314	6.71955	6.74177	5.17654	5.13913	5.45853	5.18146	noncoding	uc001wvl.1	BX248273	UCSC_knowngene	871	chr14	+	41423915	41445070	CAGGCAAGCCTTTCAGAACTAATGCCTGTTGTAATTCCCTTATTTCTTATGTGATTTAAA	intergenic							41.9438	6.69148	5.23892
ASHG19A3A040421	2.32905e-05	4.18129	up	1819.35	1817.77	1771.48	414.865	362.708	378.602	437.941	10.6808	10.6873	10.7104	8.71119	8.57574	8.69042	8.53818	noncoding	uc004exm.2	BC007360	UCSC_knowngene	646	chrX	-	133678458	133680653	TTGCAGTGTGCCTAGATTTTCCTCCAAGGACAAAAATGTGAATAAAGCAATATTTTAGCC	intergenic							398.529	10.6928	8.62888
ASHG19A3A009611	0.0030724	2.10145	up	1217.63	1137.75	1112.31	397.8	516.31	538.154	580.242	10.1175	10.0345	10.057	9.15281	9.11607	8.62672	9.09752	noncoding	NR_026905	C17orf69	RefSeq_NR	2477	chr17	+	43716340	43719669	GCTGTTCTGTAGGCACTTTGAGAAGAGGAAGAGTAGCATCTCGGTTTTAATAAAAGAAAG	intergenic							508.126	10.0697	8.99828
ASHG19A3A017849	0.000107068	9.28255	up	429.202	381.496	366.282	54.4808	43.6545	45.7983	43.5012	8.73407	8.56658	8.56141	5.22743	5.41442	5.62162	5.36118	noncoding	NR_002785	GNASAS	RefSeq_NR	1158	chr20	-	57393973	57425958	TTTCTGCACATGTCCATTAGAATTGGAGATGGGGCGTATCTAGTGTTGAATAAAGGCCCG	intronic antisense	NM_016592	GNAS	protein ALEX NESP55	+	57414794	57486250	46.8587	8.62069	5.40616
ASHG19A3A021809	0.000733976	2.05756	up	3851.6	3736.41	4066.82	1735.98	1408.76	1578.15	1713.27	11.7438	11.7109	11.8874	10.7756	10.7273	10.8558	10.6003	noncoding	ENST00000464731	RP11-451G4.4	Ensembl	381	chr3	-	155027215	155027596	CTTCGCAAAAGTCGAGTGGGCAACATATTCATTAAAAATCTGGACAAATCCATTGATAAT	intergenic							1609.04	11.7807	10.7398
ASHG19A3A018562	1.91804e-05	2.98764	up	27529.5	26741.4	27648.2	7037.97	7192.41	7376.86	7373.32	14.5038	14.4853	14.5861	12.9124	12.9759	12.9175	12.9785	noncoding	ENST00000438350	RP11-40H20.3	Ensembl	221	chr1	+	27537754	27537975	GTATTAGATGATGCAGAAGGGATTCATTCTAAAACAAAGTCAAGAAAACAACTGGGTTGA	intergenic							7245.14	14.5251	12.9461
ASHG19A3L0002364	3.68246e-05	5.15972	up	344.168	328.11	341.398	73.251	63.903	67.2698	83.7858	8.43371	8.36033	8.46115	6.20931	5.98811	6.06709	5.93992	noncoding	BF724558	lincRNA-MCL1	lincRNA	428	chr1	+	150544341	150545215	CAAATTTCCACATACTTCACATAGATAACACTGTAACAACTTTGAAACTAAGAGGGAGAG	intergenic							72.0524	8.4184	6.05111
ASHG19A3A008508	0.000263904	24.6013	up	394.698	361.016	326.304	24.7551	13.9077	16.9436	15.1878	8.61624	8.49464	8.39892	3.58387	3.8994	4.43038	3.61676	noncoding	AK000839		misc_RNA	1951	chr17	-	46657698	46659621	ATATCTAGATATTCGTTTGATCACAAACTAAAGGCTTGGAGGGGCACGGAGGAGCCGATT	intergenic							17.6985	8.50327	3.8826
ASHG19A3L0003311	7.79575e-05	3.88055	up	174.965	163.614	161.38	47.0331	48.7428	53.0134	50.4635	7.51657	7.42106	7.4371	5.44771	5.63271	5.40058	5.52692	noncoding	AF279774	lincRNA-GAP43	lincRNA	1205	chr3	+	115036855	115439886	AAAGAAGAGGAACCTGAGGCTGACCAAGAACATGCCTGAACTCTAAGAAATGGCTTTCCA	exon sense-overlapping	NM_002045	GAP43	neuromodulin isoform 2	+	115342150	115440334	49.8132	7.45824	5.50198
ASHG19A3L0003311	7.79575e-05	3.88055	up	174.965	163.614	161.38	47.0331	48.7428	53.0134	50.4635	7.51657	7.42106	7.4371	5.44771	5.63271	5.40058	5.52692	noncoding	AF279774	lincRNA-GAP43	lincRNA	1205	chr3	+	115036855	115439886	AAAGAAGAGGAACCTGAGGCTGACCAAGAACATGCCTGAACTCTAAGAAATGGCTTTCCA	exon sense-overlapping	NM_001130064	GAP43	neuromodulin isoform 1	+	115342150	115440334	49.8132	7.45824	5.50198
ASHG19A3A009517	1.70669e-05	12.8509	up	918.881	774.162	786.023	67.208	62.2055	68.1938	67.175	9.73865	9.51398	9.58887	5.87745	6.00716	5.93504	5.90052	noncoding	AK094723		misc_RNA	2466	chr17	+	39821817	39824283	CGTCCTTCAGGAAGCCAGAAAGAATACATTAATAAAAGAGGAAGTAATAGTTATTGCTCA	intergenic							66.1956	9.61384	5.93004
ASHG19A3A030785	0.000139148	9.99923	up	271.082	271.008	292.951	27.8873	32.3235	37.2844	30.3918	8.09669	8.0988	8.25068	4.67684	5.10485	4.61404	4.9119	noncoding	AK094629		misc_RNA	2028	chr6	-	161411345	161413374	TACACTGAGGGGATGGGGGGAAGAAGAAATGCTAAAGATTATTTCAGAGTTACAGAAATC	natural antisense	NM_005922	MAP3K4	mitogen-activated protein kinase kinase kinase 4	+	161412821	161538417	31.9717	8.14872	4.82691
ASHG19A3A030785	0.000139148	9.99923	up	271.082	271.008	292.951	27.8873	32.3235	37.2844	30.3918	8.09669	8.0988	8.25068	4.67684	5.10485	4.61404	4.9119	noncoding	AK094629		misc_RNA	2028	chr6	-	161411345	161413374	TACACTGAGGGGATGGGGGGAAGAAGAAATGCTAAAGATTATTTCAGAGTTACAGAAATC	natural antisense	NM_006724	MAP3K4	mitogen-activated protein kinase kinase kinase 4	+	161412821	161538417	31.9717	8.14872	4.82691
ASHG19A3A049492	1.87536e-05	2.71626	up	59559.6	53418	54205.2	15313.4	15253.5	15866.9	16350.2	15.5802	15.4679	15.5438	14.0858	14.1086	14.0789	14.0827	noncoding	ENST00000454403	RP11-396A22.4	Ensembl	411	chr13	-	41958908	41959319	TTAACGTGCAGAACAAGAACAGCAGCTACTTTGTGGAATGGATCCCCAACAACGTCAAGA	intergenic							15696	15.5306	14.089
ASHG19A3A007104	0.000142411	4.21392	up	132.004	125.637	134.709	33.2585	36.3522	36.1433	42.6547	7.13104	7.06258	7.19551	5.19789	5.05842	4.87646	5.08542	noncoding	NR_002766	MEG3	RefSeq_NR	1595	chr14	+	101292444	101327358	ACTCCGTGGAAGCACGCTCACAAAGGCACGTGGGCCGTGGCCCGGCTGGGTCGGCTGAAG	intergenic							37.1022	7.12971	5.05455
ASHG19A3A008476	1.4609e-05	2.15633	up	462.662	472.146	464.928	231.514	215.591	208.869	228.982	8.83139	8.85097	8.87051	7.72827	7.68048	7.80044	7.76031	noncoding	BC065911		NRED	2987	chr17	-	45125430	45128397	AGTTCTGAGTCTTCCATTGGTCCGTATCCCATTCTATCTCAGATGCCTTTACTTCCTGCT	intergenic							221.239	8.85096	7.74238
ASHG19A3A025590	0.000116523	2.89868	up	1371.7	1240.08	1182.92	414.801	398.222	404.071	405.365	10.2889	10.1568	10.1431	8.59573	8.67996	8.69008	8.67767	noncoding	ENST00000508720	RP11-584P21.4	Ensembl	297	chr4	+	68312001	68312298	ATATAATTACGTTGCTATGGACACGAGTTTCCAGCTGTGGTTGCAAAACCCATTGGAGAA	intergenic							405.615	10.1963	8.66086
ASHG19A3A013997	0.000721855	2.00223	up	45.46	52.6531	44.7795	28.5905	30.5795	28.7879	31.59	5.65172	5.87774	5.6809	4.74022	4.71674	4.65338	4.83036	noncoding	ENST00000432762	AC018696.3	Ensembl	139	chr2	-	91685385	91685524	TGAGGAGGATCAAAATGTTGGAGTATGCTCTTGAACAGGAAAGGTAATTCAGTAAAATGA	intergenic							29.887	5.73679	4.73518
ASHG19A3A014675	9.96316e-07	3.79141	up	3912.78	3790.04	3792.47	902.844	843.827	855.999	899.463	11.7662	11.7279	11.7889	9.8255	9.81137	9.89226	9.82393	noncoding	uc002ukz.1	LOC375295	UCSC_knowngene	1156	chr2	-	177494567	177502659	CTGTGATTGGCATCCCCATCATGCTGTAACTGACACAAAATAAACTTAGGGTAATTGCCG	intergenic							875.533	11.761	9.83826
ASHG19A3A031188	0.00197808	2.13012	up	432.468	335.136	441.437	202.261	188.445	196.727	194.716	8.74482	8.38922	8.80412	7.48625	7.58832	7.58989	7.55601	noncoding	ENST00000416785	RPSAP2	Ensembl	888	chr6	+	28699793	28700681	ATTGAAAAAGAAAAGCAAGCTGCTGCTGAAAAGGCTGTGACCAACGAGGAATTTCAGGGT	intergenic							195.537	8.64605	7.55512
ASHG19A3A040404	4.90851e-05	2.86684	up	983.201	1081.04	935.642	320.706	312.336	327.06	366.527	9.84035	9.96054	9.81943	8.44307	8.35739	8.29653	8.31894	noncoding	ENST00000394346	RP11-512H23.2	Ensembl	511	chrX	-	130929684	130930195	AGAACTTCGTGCCCATTGACTTGGACGAGTGGTGGGCGCAGCACTTCCTGGCTAGAATCA	intergenic							331.657	9.87344	8.35398
ASHG19A3A047882	2.1209e-05	6.01055	up	341.097	300.851	326.71	55.3584	58.6516	56.6152	67.0897	8.42044	8.23575	8.40049	5.87514	5.73013	5.64328	5.81038	noncoding	AK057683		misc_RNA	3087	chr1	-	88270968	88274055	CGAACTGCATTTCAAGTAATTCACCCTGGCAGTTTTATTCTCAAAATGGAAATCTTAGTA	intergenic							59.4287	8.35223	5.76473
ASHG19A3A034480	0.00179324	2.24807	up	133.021	120.588	123.31	58.8735	72.9328	67.3286	62.2489	7.14245	7.00448	7.07465	5.76364	5.98895	5.73823	6.12987	noncoding	ENST00000448776	GS1-124K5.10	Ensembl	712	chr7	+	65976542	66010053	TCCCAGAACCTGGAGAGGATTCTTGCCATGGCCAACAAGATCACGTTCACAGTCACCAGG	intergenic							65.3459	7.07386	5.90517
ASHG19A3A015010	0.00743793	2.43	up	41.9375	34.8692	36.4151	14.4244	19.6381	24.443	24.2142	5.53383	5.32912	5.39442	4.33016	4.47059	3.58754	4.16439	noncoding	uc002vje.1	BC038542	UCSC_knowngene	1008	chr2	-	219765535	219795358	AATGACACTCCAGGAACAATGACACTCCAGAAACAATGACACTCCAGGAACAATGACACT	intergenic							20.6799	5.41913	4.13817
ASHG19A3A044949	1.68089e-05	2.64766	up	2514.41	2536.97	2546.61	867.056	831.662	777.249	883.001	11.1517	11.1626	11.224	9.79452	9.67302	9.8285	9.80275	noncoding	uc001mkl.1	AK001432	UCSC_knowngene	1558	chr11	-	13001081	13011095	AAGGGAAGGCTGCTGCCTCTCACTTCTCCCTGTTTTGTTGTTCTTTTAAGTAGCATGTGT	intergenic							839.742	11.1794	9.7747
ASHG19A3A042589	0.000172289	2.18713	up	1058.5	1010.55	1095.08	473.284	445.108	449.787	425.212	9.93332	9.87026	10.0351	8.668	8.84245	8.90034	8.85794	noncoding	ENST00000450834	RP11-192P3.1	Ensembl	564	chr10	-	31596657	31607964	CCAACTGAGTTATTCAATAAAGCCTGCCTTGTTGAATCTGTTTTCCCATGTATAGTTTAT	bidirectional	NM_001174096	ZEB1	zinc finger E-box-binding homeobox 1 isoform f	+	31608100	31818742	448.348	9.94623	8.81718
ASHG19A3A042589	0.000172289	2.18713	up	1058.5	1010.55	1095.08	473.284	445.108	449.787	425.212	9.93332	9.87026	10.0351	8.668	8.84245	8.90034	8.85794	noncoding	ENST00000450834	RP11-192P3.1	Ensembl	564	chr10	-	31596657	31607964	CCAACTGAGTTATTCAATAAAGCCTGCCTTGTTGAATCTGTTTTCCCATGTATAGTTTAT	bidirectional	NM_030751	ZEB1	zinc finger E-box-binding homeobox 1 isoform b	+	31608100	31818742	448.348	9.94623	8.81718
ASHG19A3A042589	0.000172289	2.18713	up	1058.5	1010.55	1095.08	473.284	445.108	449.787	425.212	9.93332	9.87026	10.0351	8.668	8.84245	8.90034	8.85794	noncoding	ENST00000450834	RP11-192P3.1	Ensembl	564	chr10	-	31596657	31607964	CCAACTGAGTTATTCAATAAAGCCTGCCTTGTTGAATCTGTTTTCCCATGTATAGTTTAT	bidirectional	NM_001174095	ZEB1	zinc finger E-box-binding homeobox 1 isoform e	+	31608100	31818742	448.348	9.94623	8.81718
ASHG19A3A042589	0.000172289	2.18713	up	1058.5	1010.55	1095.08	473.284	445.108	449.787	425.212	9.93332	9.87026	10.0351	8.668	8.84245	8.90034	8.85794	noncoding	ENST00000450834	RP11-192P3.1	Ensembl	564	chr10	-	31596657	31607964	CCAACTGAGTTATTCAATAAAGCCTGCCTTGTTGAATCTGTTTTCCCATGTATAGTTTAT	bidirectional	NM_001174093	ZEB1	zinc finger E-box-binding homeobox 1 isoform c	+	31608100	31818742	448.348	9.94623	8.81718
ASHG19A3L0002515	3.28609e-06	3.9419	up	4707.67	4399.76	4449.39	1036.33	934.059	949.114	1044.92	12.0378	11.9532	12.0223	10.0484	9.97522	10.0945	9.98406	noncoding	AF191495	lincRNA-F11R	lincRNA	2187	chr1	-	160967605	161008711	GCATAGTAAATTTTCAGAGAACTTGAAGCCAAAAGGATTTAAAACCGCTGCTCTAAAGAA	exon sense-overlapping	NM_001113207	TSTD1	thiosulfate sulfurtransferase/rhodanese-like	-	161007421	161008774	991.108	12.0044	10.0255
ASHG19A3L0002515	3.28609e-06	3.9419	up	4707.67	4399.76	4449.39	1036.33	934.059	949.114	1044.92	12.0378	11.9532	12.0223	10.0484	9.97522	10.0945	9.98406	noncoding	AF191495	lincRNA-F11R	lincRNA	2187	chr1	-	160967605	161008711	GCATAGTAAATTTTCAGAGAACTTGAAGCCAAAAGGATTTAAAACCGCTGCTCTAAAGAA	exon sense-overlapping	NM_001113205	TSTD1	thiosulfate sulfurtransferase/rhodanese-like	-	161007421	161008774	991.108	12.0044	10.0255
ASHG19A3L0002515	3.28609e-06	3.9419	up	4707.67	4399.76	4449.39	1036.33	934.059	949.114	1044.92	12.0378	11.9532	12.0223	10.0484	9.97522	10.0945	9.98406	noncoding	AF191495	lincRNA-F11R	lincRNA	2187	chr1	-	160967605	161008711	GCATAGTAAATTTTCAGAGAACTTGAAGCCAAAAGGATTTAAAACCGCTGCTCTAAAGAA	exon sense-overlapping	NM_001113206	TSTD1	thiosulfate sulfurtransferase/rhodanese-like	-	161007421	161008774	991.108	12.0044	10.0255
ASHG19A3L0002515	3.28609e-06	3.9419	up	4707.67	4399.76	4449.39	1036.33	934.059	949.114	1044.92	12.0378	11.9532	12.0223	10.0484	9.97522	10.0945	9.98406	noncoding	AF191495	lincRNA-F11R	lincRNA	2187	chr1	-	160967605	161008711	GCATAGTAAATTTTCAGAGAACTTGAAGCCAAAAGGATTTAAAACCGCTGCTCTAAAGAA	exon sense-overlapping	NM_016946	F11R	junctional adhesion molecule A precursor	-	160965000	160991133	991.108	12.0044	10.0255
ASHG19A3L0000268	0.00429489	2.15855	up	96.8591	95.9904	100.505	74.6043	47.273	46.7004	51.5965	6.71493	6.69904	6.79278	5.48119	5.44318	6.09503	5.48269	noncoding	BX647904	lincRNA-ZNF365-2	lincRNA	2954	chr10	+	64018915	64161151	CGTAATTAACATTGGCAGAATTATGATTGTTACTGCAATAAGCATCAAATTAGCAGCGCA	exon sense-overlapping	NM_014951	ZNF365	protein ZNF365 isoform A	+	64133915	64162217	55.0436	6.73558	5.62552
ASHG19A3L0000268	0.00429489	2.15855	up	96.8591	95.9904	100.505	74.6043	47.273	46.7004	51.5965	6.71493	6.69904	6.79278	5.48119	5.44318	6.09503	5.48269	noncoding	BX647904	lincRNA-ZNF365-2	lincRNA	2954	chr10	+	64018915	64161151	CGTAATTAACATTGGCAGAATTATGATTGTTACTGCAATAAGCATCAAATTAGCAGCGCA	intronic antisense	NM_145307	RTKN2	rhotekin-2	-	63952952	64028466	55.0436	6.73558	5.62552
ASHG19A3L0000268	0.00429489	2.15855	up	96.8591	95.9904	100.505	74.6043	47.273	46.7004	51.5965	6.71493	6.69904	6.79278	5.48119	5.44318	6.09503	5.48269	noncoding	BX647904	lincRNA-ZNF365-2	lincRNA	2954	chr10	+	64018915	64161151	CGTAATTAACATTGGCAGAATTATGATTGTTACTGCAATAAGCATCAAATTAGCAGCGCA	exon sense-overlapping	NM_199451	ZNF365	protein ZNF365 isoform C	+	64133915	64431771	55.0436	6.73558	5.62552
ASHG19A3L0000268	0.00429489	2.15855	up	96.8591	95.9904	100.505	74.6043	47.273	46.7004	51.5965	6.71493	6.69904	6.79278	5.48119	5.44318	6.09503	5.48269	noncoding	BX647904	lincRNA-ZNF365-2	lincRNA	2954	chr10	+	64018915	64161151	CGTAATTAACATTGGCAGAATTATGATTGTTACTGCAATAAGCATCAAATTAGCAGCGCA	exon sense-overlapping	NM_199450	ZNF365	protein ZNF365 isoform B	+	64133915	64240048	55.0436	6.73558	5.62552
ASHG19A3L0000620	0.00257639	4.08118	up	784.362	763.196	814.241	177.314	157.694	273.497	174.48	9.5287	9.49587	9.63468	7.31395	8.09733	7.39499	7.2901	noncoding	DA687098	lincRNA-TRPC4-2	lincRNA	544	chr13	-	38764994	38924385	TACTGCTCATTTTGAAGACTTGGAGCAGTGTTACTTTTCTACAAGGATGTCTCGTATCTC	natural antisense	NM_016617	UFM1	ubiquitin-fold modifier 1 precursor	+	38923941	38937143	195.746	9.55308	7.52409
ASHG19A3A026874	1.39143e-05	6.42897	up	154.235	149.537	152.292	28.2131	26.3846	29.5175	29.0621	7.34275	7.2978	7.36347	4.61181	4.75402	4.63043	4.60407	noncoding	uc003juq.2	BC028670	UCSC_knowngene	1649	chr5	-	65500951	65505274	CAATTAATGACAGCCTGTAGAGTTCTGTATTCATAGAAGCAGTAGGGGTACATGCTGCAG	intergenic							28.2943	7.33467	4.65008
ASHG19A3A014202	5.87479e-05	2.09802	up	1562.1	1521.13	1559.39	663.52	620.457	651.972	698.611	10.4634	10.4361	10.5237	9.43773	9.40592	9.41236	9.36544	noncoding	uc002the.2	LOC541471	UCSC_knowngene	1583	chr2	-	111965358	112252692	TAGGATAAAGCAACAAGCCTGGACTTTGCTCTACAACAGGGTTTTGCATAGGGAGTGGTA	intergenic							658.64	10.4744	9.40536
ASHG19A3A051292	4.29928e-05	2.17512	up	10070.1	8652.3	9557.95	3549	3780.11	3277	3720.25	13.0981	12.9045	13.0918	11.9114	11.7938	11.906	12.0303	noncoding	AK057381		misc_RNA	1873	chr14	+	23763060	23764935	AGCAGATTGCTCACAAATTGACTGAAGGTAAAGCACCCAGGAAGCAACTGCCTACAAAAG	intergenic							3581.59	13.0315	11.9104
ASHG19A3L0002223	0.001659	6.38976	up	107.919	184.696	92.3811	15.4883	27.4367	26.7845	26.7491	6.86012	7.5833	6.67505	4.48027	4.6062	3.70312	4.66533	noncoding	BX098775	lincRNA-JAK2-1	lincRNA	478	chr9	-	5132032	5165921	GAAGGTAAAACTCAGTTTCAAGTTTCTTTGTCAACAACAACCTTTACTCCTATTACCAAG	exon sense-overlapping	NM_007179	INSL6	insulin-like peptide INSL6 precursor	-	5163862	5185618	24.1146	7.03949	4.36373
ASHG19A3A042428	0.00261164	2.2696	up	47.3561	36.0349	42.0384	20.0549	28.3486	21.043	25.9701	5.70773	5.37306	5.59097	4.43542	4.23949	4.1076	4.71674	noncoding	ENST00000419836	RP5-1051H14.2	Ensembl	344	chr10	-	9800745	9801200	TGGGGAACTTTGGTGGGTGCTTGATAATGGGGACTGGAATAAAAACTGGCTAAGCAAAAA	intergenic							23.8542	5.55725	4.37481
ASHG19A3A014684	0.0116766	2.84517	up	25.0952	21.4622	67.8796	21.7613	15.0609	14.4632	13.3044	4.81904	4.69362	6.24852	3.35728	3.64675	4.22905	3.74777	noncoding	ENST00000456746	AC074286.1	Ensembl	5147	chr2	-	178148239	178257419	CGGTAACCACCAACAGTCTTGGAGTAACAAGTCTTAAATTCTGATTCTCAGTCGGCTAAA	bidirectional	NM_003659	AGPS	alkyldihydroxyacetonephosphate synthase,	+	178257470	178408564	16.1475	5.25373	3.74521
ASHG19A3L0001218	9.88194e-06	2.3648	up	5131.25	4552.33	4857.36	1727.47	1732.15	1579.38	1942.54	12.1532	12.0062	12.1331	10.9598	10.7282	10.8499	10.8853	noncoding	AY034104	lincRNA-TACR1-2	lincRNA	306	chr2	+	75186481	75252012	TGCAATAGAAGCTGTGGATGAATCTGCTTTTCTGGAAGGAAATAACCAGGAATGCAAAGA	exon sense-overlapping	NM_019896	POLE4	DNA polymerase epsilon subunit 4	+	75185774	75196859	1745.39	12.0975	10.8558
ASHG19A3A028826	3.67191e-05	8.06368	up	420.833	451.815	408.619	56.4805	54.5694	52.7317	68.4458	8.70727	8.79566	8.70892	5.90777	5.62489	5.67239	5.69833	noncoding	uc003laj.1	AK026965	UCSC_knowngene	2474	chr5	+	134368969	134680370	TAAACTATGCATAGAAAACGACTGGAAAGAAACATTAACAGTGACTATCTTTGCACAGTG	natural antisense	NM_138610	H2AFY	core histone macro-H2A.1 isoform 3	-	134670070	134734928	58.0568	8.73728	5.72584
ASHG19A3A028826	3.67191e-05	8.06368	up	420.833	451.815	408.619	56.4805	54.5694	52.7317	68.4458	8.70727	8.79566	8.70892	5.90777	5.62489	5.67239	5.69833	noncoding	uc003laj.1	AK026965	UCSC_knowngene	2474	chr5	+	134368969	134680370	TAAACTATGCATAGAAAACGACTGGAAAGAAACATTAACAGTGACTATCTTTGCACAGTG	natural antisense	NM_138609	H2AFY	core histone macro-H2A.1 isoform 1	-	134670070	134734928	58.0568	8.73728	5.72584
ASHG19A3A028826	3.67191e-05	8.06368	up	420.833	451.815	408.619	56.4805	54.5694	52.7317	68.4458	8.70727	8.79566	8.70892	5.90777	5.62489	5.67239	5.69833	noncoding	uc003laj.1	AK026965	UCSC_knowngene	2474	chr5	+	134368969	134680370	TAAACTATGCATAGAAAACGACTGGAAAGAAACATTAACAGTGACTATCTTTGCACAGTG	natural antisense	NM_004893	H2AFY	core histone macro-H2A.1 isoform 2	-	134670070	134735577	58.0568	8.73728	5.72584
ASHG19A3A028826	3.67191e-05	8.06368	up	420.833	451.815	408.619	56.4805	54.5694	52.7317	68.4458	8.70727	8.79566	8.70892	5.90777	5.62489	5.67239	5.69833	noncoding	uc003laj.1	AK026965	UCSC_knowngene	2474	chr5	+	134368969	134680370	TAAACTATGCATAGAAAACGACTGGAAAGAAACATTAACAGTGACTATCTTTGCACAGTG	natural antisense	NM_001040158	H2AFY	core histone macro-H2A.1 isoform 2	-	134670070	134734928	58.0568	8.73728	5.72584
ASHG19A3A028826	3.67191e-05	8.06368	up	420.833	451.815	408.619	56.4805	54.5694	52.7317	68.4458	8.70727	8.79566	8.70892	5.90777	5.62489	5.67239	5.69833	noncoding	uc003laj.1	AK026965	UCSC_knowngene	2474	chr5	+	134368969	134680370	TAAACTATGCATAGAAAACGACTGGAAAGAAACATTAACAGTGACTATCTTTGCACAGTG	intronic antisense	NM_002653	PITX1	pituitary homeobox 1	-	134363423	134369964	58.0568	8.73728	5.72584
ASHG19A3A045797	0.000257458	3.24097	up	669.626	697.171	656.616	228.189	170.498	209.207	227.816	9.31926	9.37055	9.33936	7.72023	7.6832	7.77598	7.40712	noncoding	ENST00000451822	AP002959.1	Ensembl	1071	chr11	-	121232558	121233631	GCGTTGAGAATTAAGAAGATGCTTGCCAAGATGGTTGAATCCCAAGATGTAAAAATCTGA	intergenic							208.928	9.34305	7.64663
ASHG19A3A020653	2.01206e-05	3.54634	up	11771.9	12655.1	11964.4	2849.38	2643.29	2754.99	2951.47	13.3148	13.4371	13.3928	11.5854	11.539	11.5826	11.5139	noncoding	ENST00000450418	AC023480.1	Ensembl	2315	chr3	-	4023664	4025979	CCCTAGGATTAGAAGTTGGCCAAGAAATTCAGGTGAAATACTTTGGATGTGACCCAGCTG	intergenic							2799.78	13.3816	11.5552
ASHG19A3A014743	0.00100945	2.76563	up	140.599	139.848	137.292	59.105	70.1731	51.9375	54.8887	7.21957	7.21023	7.22055	5.57674	5.60003	5.74326	6.07667	noncoding	ENST00000456653	AC097500.2	Ensembl	825	chr2	-	186897871	186947960	AGAAAGCTGAAAACACACTGAGGATTATGGGAGAGGGGCAAGTGCATGAAGCTTCTCAAT	intergenic							59.0261	7.21678	5.74918
ASHG19A3A026882	0.00141454	3.194	up	2344.53	2522.04	2818.33	611.612	684.051	762.663	784.722	11.0491	11.154	11.369	9.60739	9.64557	9.28866	9.51968	noncoding	ENST00000515142	RP11-83M16.3	Ensembl	405	chr5	-	66985860	66986265	GAGCACGTTTTACGATATGGGATAAGCTATTGGAAAGATCTCATAAAATGGTAACTGAAG	intergenic							710.762	11.1907	9.51532
ASHG19A3L0000863	0.000588537	2.077	up	366.485	411.391	410.896	226.456	198.026	174.127	199.597	8.52029	8.67249	8.71572	7.52158	7.40624	7.7654	7.63343	noncoding	CR739801	lincRNA-PARN	lincRNA	746	chr16	+	14399103	14399849	CTGAATATATTTTGGCTTTTCTCTTTTTGCCTCTGTGTGAGAAACTTCATTAAGCAGTTG	intergenic							199.552	8.63617	7.58166
ASHG19A3A030623	0.00161309	2.63794	up	5135.2	4977.34	5731.46	1595.19	2251.86	1617.51	1420.41	12.1553	12.1281	12.373	10.5071	10.7667	10.7312	11.2724	noncoding	ENST00000402768	RP11-15H7.1	Ensembl	767	chr6	-	139935574	139936341	ACTGGGAACGACTGCATAGACTATATAAGGAAGTAAAGAATCACCTGGACTATCATATAA	intergenic							1721.24	12.2188	10.8194
ASHG19A3A043933	8.49021e-05	8.39518	up	861.647	919.948	901.612	95.3256	100.531	109.97	127.399	9.65334	9.74791	9.77368	6.83661	6.71089	6.46602	6.60815	noncoding	ENST00000420752	RP11-507K13.4	Ensembl	1053	chr10	+	50979886	50981345	ATGTGAAAGGAATGGATTGGTTAAAGCCAGATAGCACTAAAGGAAGCATCACAGCAACTG	intergenic							108.306	9.72498	6.65542
ASHG19A3A026813	0.0171838	3.30722	up	442.149	418.491	402.809	118.371	255.035	98.2741	110.288	8.77654	8.69307	8.68794	6.62075	6.54544	6.77865	8.02941	noncoding	ENST00000515236	RP11-365H8.3	Ensembl	1327	chr5	-	55571130	55572457	CAAAAAATCTATAGAAAGTGTTCTTTATAAGAAACACGAAGGCATCCCTGAGGGGCTTTA	intergenic							145.492	8.71919	6.99356
ASHG19A3A055183	0.00265826	2.3215	up	70.8097	67.2925	89.1238	38.8338	48.3835	40.6419	32.2404	6.28076	6.2067	6.63099	4.77146	5.2305	5.11302	5.51605	noncoding	uc003adh.2	BC015159	UCSC_knowngene	687	chr22	-	27619258	27622760	AATGCACACCTGAGCTCCGGATTCACAGTGGAGGAAGCCAGATGCCATGTCATGAGGGTG	intergenic							40.0249	6.37282	5.15776
ASHG19A3L0000271	0.000597718	4.18109	up	417.534	395.853	322.288	99.6138	100.578	82.1033	107.884	8.6962	8.61986	8.3767	6.58978	6.27441	6.52788	6.60944	noncoding	BM680929	lincRNA-PLA2G12B	lincRNA	520	chr10	-	74761774	74762435	ATAGATGAGCTGCCGTGGGGTTTCTTGTCCACAAAGGCATTTACATCAAAATAAAAATAA	intergenic							97.5447	8.56425	6.50038
ASHG19A3L0001809	0.000703309	2.657	up	87.0639	97.3875	83.5933	39.1598	37.1918	37.6844	49.8803	6.56424	6.71803	6.54544	5.42961	5.12097	5.12462	5.12257	noncoding	AK300335	lincRNA-C6orf138-1	lincRNA	2328	chr6	-	47845987	48078943	CAGTATGAGGGGTATAGACCAGTGGATTATTTTTCTTTTCCAGTATTGCACAATGATGCA	exon sense-overlapping	NM_207499	C6orf138	patched domain-containing protein C6orf138	-	47867344	48036425	40.9791	6.60924	5.19944
ASHG19A3L0001809	0.000703309	2.657	up	87.0639	97.3875	83.5933	39.1598	37.1918	37.6844	49.8803	6.56424	6.71803	6.54544	5.42961	5.12097	5.12462	5.12257	noncoding	AK300335	lincRNA-C6orf138-1	lincRNA	2328	chr6	-	47845987	48078943	CAGTATGAGGGGTATAGACCAGTGGATTATTTTTCTTTTCCAGTATTGCACAATGATGCA	exon sense-overlapping	NM_001013732	C6orf138	patched domain-containing protein C6orf138	-	47845763	48036425	40.9791	6.60924	5.19944
ASHG19A3L0002368	0.000421327	2.27261	up	5576.28	4996.36	4971.66	1977.25	2006.43	1872.39	1861.36	12.2747	12.1331	12.1663	10.8989	10.9844	11.0445	11.1003	noncoding	AX747492	lincRNA-HFE2	lincRNA	4510	chr1	+	145209144	146424095	AGGACTCACTGGGTAGATGTTATTCGACTCCTTCAGGTTATCTTGAACTGCCTGACTTAG	exon sense-overlapping	NM_203458	NOTCH2NL	notch homolog 2 N-terminal-like protein	+	145209110	145285912	1929.36	12.1914	11.007
ASHG19A3L0002368	0.000421327	2.27261	up	5576.28	4996.36	4971.66	1977.25	2006.43	1872.39	1861.36	12.2747	12.1331	12.1663	10.8989	10.9844	11.0445	11.1003	noncoding	AX747492	lincRNA-HFE2	lincRNA	4510	chr1	+	145209144	146424095	AGGACTCACTGGGTAGATGTTATTCGACTCCTTCAGGTTATCTTGAACTGCCTGACTTAG	intron sense-overlapping	NM_001097616	GPR89C	putative Golgi pH regulator C	+	145883867	145924049	1929.36	12.1914	11.007
ASHG19A3L0002368	0.000421327	2.27261	up	5576.28	4996.36	4971.66	1977.25	2006.43	1872.39	1861.36	12.2747	12.1331	12.1663	10.8989	10.9844	11.0445	11.1003	noncoding	AX747492	lincRNA-HFE2	lincRNA	4510	chr1	+	145209144	146424095	AGGACTCACTGGGTAGATGTTATTCGACTCCTTCAGGTTATCTTGAACTGCCTGACTTAG	intron sense-overlapping	NM_145277	HFE2	hemojuvelin isoform b	+	145413190	145417545	1929.36	12.1914	11.007
ASHG19A3L0002368	0.000421327	2.27261	up	5576.28	4996.36	4971.66	1977.25	2006.43	1872.39	1861.36	12.2747	12.1331	12.1663	10.8989	10.9844	11.0445	11.1003	noncoding	AX747492	lincRNA-HFE2	lincRNA	4510	chr1	+	145209144	146424095	AGGACTCACTGGGTAGATGTTATTCGACTCCTTCAGGTTATCTTGAACTGCCTGACTTAG	intronic antisense	NM_001012758	NUDT17	nucleoside diphosphate-linked moiety X motif 17	-	145586492	145589435	1929.36	12.1914	11.007
ASHG19A3L0002368	0.000421327	2.27261	up	5576.28	4996.36	4971.66	1977.25	2006.43	1872.39	1861.36	12.2747	12.1331	12.1663	10.8989	10.9844	11.0445	11.1003	noncoding	AX747492	lincRNA-HFE2	lincRNA	4510	chr1	+	145209144	146424095	AGGACTCACTGGGTAGATGTTATTCGACTCCTTCAGGTTATCTTGAACTGCCTGACTTAG	intron sense-overlapping	NM_003637	ITGA10	integrin alpha-10 precursor	+	145524989	145543868	1929.36	12.1914	11.007
ASHG19A3L0002368	0.000421327	2.27261	up	5576.28	4996.36	4971.66	1977.25	2006.43	1872.39	1861.36	12.2747	12.1331	12.1663	10.8989	10.9844	11.0445	11.1003	noncoding	AX747492	lincRNA-HFE2	lincRNA	4510	chr1	+	145209144	146424095	AGGACTCACTGGGTAGATGTTATTCGACTCCTTCAGGTTATCTTGAACTGCCTGACTTAG	intronic antisense	NM_007053	CD160	CD160 antigen precursor	-	145695797	145715565	1929.36	12.1914	11.007
ASHG19A3L0002368	0.000421327	2.27261	up	5576.28	4996.36	4971.66	1977.25	2006.43	1872.39	1861.36	12.2747	12.1331	12.1663	10.8989	10.9844	11.0445	11.1003	noncoding	AX747492	lincRNA-HFE2	lincRNA	4510	chr1	+	145209144	146424095	AGGACTCACTGGGTAGATGTTATTCGACTCCTTCAGGTTATCTTGAACTGCCTGACTTAG	intron sense-overlapping	NM_006472	TXNIP	thioredoxin-interacting protein	+	145438461	145442628	1929.36	12.1914	11.007
ASHG19A3L0002368	0.000421327	2.27261	up	5576.28	4996.36	4971.66	1977.25	2006.43	1872.39	1861.36	12.2747	12.1331	12.1663	10.8989	10.9844	11.0445	11.1003	noncoding	AX747492	lincRNA-HFE2	lincRNA	4510	chr1	+	145209144	146424095	AGGACTCACTGGGTAGATGTTATTCGACTCCTTCAGGTTATCTTGAACTGCCTGACTTAG	intron sense-overlapping	NM_014455	RNF115	E3 ubiquitin-protein ligase RNF115	+	145611035	145688776	1929.36	12.1914	11.007
ASHG19A3L0002368	0.000421327	2.27261	up	5576.28	4996.36	4971.66	1977.25	2006.43	1872.39	1861.36	12.2747	12.1331	12.1663	10.8989	10.9844	11.0445	11.1003	noncoding	AX747492	lincRNA-HFE2	lincRNA	4510	chr1	+	145209144	146424095	AGGACTCACTGGGTAGATGTTATTCGACTCCTTCAGGTTATCTTGAACTGCCTGACTTAG	intron sense-overlapping	NM_001201325	PDZK1	Na(+)/H(+) exchange regulatory cofactor NHE-RF3	+	145727665	145764206	1929.36	12.1914	11.007
ASHG19A3L0002368	0.000421327	2.27261	up	5576.28	4996.36	4971.66	1977.25	2006.43	1872.39	1861.36	12.2747	12.1331	12.1663	10.8989	10.9844	11.0445	11.1003	noncoding	AX747492	lincRNA-HFE2	lincRNA	4510	chr1	+	145209144	146424095	AGGACTCACTGGGTAGATGTTATTCGACTCCTTCAGGTTATCTTGAACTGCCTGACTTAG	intron sense-overlapping	NM_003846	PEX11B	peroxisomal membrane protein 11B isoform 1	+	145516164	145523732	1929.36	12.1914	11.007
ASHG19A3L0002368	0.000421327	2.27261	up	5576.28	4996.36	4971.66	1977.25	2006.43	1872.39	1861.36	12.2747	12.1331	12.1663	10.8989	10.9844	11.0445	11.1003	noncoding	AX747492	lincRNA-HFE2	lincRNA	4510	chr1	+	145209144	146424095	AGGACTCACTGGGTAGATGTTATTCGACTCCTTCAGGTTATCTTGAACTGCCTGACTTAG	intronic antisense	NM_032305	POLR3GL	DNA-directed RNA polymerase III subunit	-	145456235	145470387	1929.36	12.1914	11.007
ASHG19A3L0002368	0.000421327	2.27261	up	5576.28	4996.36	4971.66	1977.25	2006.43	1872.39	1861.36	12.2747	12.1331	12.1663	10.8989	10.9844	11.0445	11.1003	noncoding	AX747492	lincRNA-HFE2	lincRNA	4510	chr1	+	145209144	146424095	AGGACTCACTGGGTAGATGTTATTCGACTCCTTCAGGTTATCTTGAACTGCCTGACTTAG	intron sense-overlapping	NM_213653	HFE2	hemojuvelin isoform a precursor	+	145413190	145417545	1929.36	12.1914	11.007
ASHG19A3L0002368	0.000421327	2.27261	up	5576.28	4996.36	4971.66	1977.25	2006.43	1872.39	1861.36	12.2747	12.1331	12.1663	10.8989	10.9844	11.0445	11.1003	noncoding	AX747492	lincRNA-HFE2	lincRNA	4510	chr1	+	145209144	146424095	AGGACTCACTGGGTAGATGTTATTCGACTCCTTCAGGTTATCTTGAACTGCCTGACTTAG	intron sense-overlapping	NM_153713	LIX1L	LIX1-like protein	+	145477084	145499091	1929.36	12.1914	11.007
ASHG19A3L0002368	0.000421327	2.27261	up	5576.28	4996.36	4971.66	1977.25	2006.43	1872.39	1861.36	12.2747	12.1331	12.1663	10.8989	10.9844	11.0445	11.1003	noncoding	AX747492	lincRNA-HFE2	lincRNA	4510	chr1	+	145209144	146424095	AGGACTCACTGGGTAGATGTTATTCGACTCCTTCAGGTTATCTTGAACTGCCTGACTTAG	intron sense-overlapping	NM_144698	ANKRD35	ankyrin repeat domain-containing protein 35	+	145549208	145568526	1929.36	12.1914	11.007
ASHG19A3L0002368	0.000421327	2.27261	up	5576.28	4996.36	4971.66	1977.25	2006.43	1872.39	1861.36	12.2747	12.1331	12.1663	10.8989	10.9844	11.0445	11.1003	noncoding	AX747492	lincRNA-HFE2	lincRNA	4510	chr1	+	145209144	146424095	AGGACTCACTGGGTAGATGTTATTCGACTCCTTCAGGTTATCTTGAACTGCCTGACTTAG	exon sense-overlapping	NM_001039703	NBPF10	neuroblastoma breakpoint family member 10	+	145293370	145368684	1929.36	12.1914	11.007
ASHG19A3L0002368	0.000421327	2.27261	up	5576.28	4996.36	4971.66	1977.25	2006.43	1872.39	1861.36	12.2747	12.1331	12.1663	10.8989	10.9844	11.0445	11.1003	noncoding	AX747492	lincRNA-HFE2	lincRNA	4510	chr1	+	145209144	146424095	AGGACTCACTGGGTAGATGTTATTCGACTCCTTCAGGTTATCTTGAACTGCCTGACTTAG	intronic antisense	NM_001097612	GPR89A	Golgi pH regulator A isoform 1	-	145764594	145827103	1929.36	12.1914	11.007
ASHG19A3L0002368	0.000421327	2.27261	up	5576.28	4996.36	4971.66	1977.25	2006.43	1872.39	1861.36	12.2747	12.1331	12.1663	10.8989	10.9844	11.0445	11.1003	noncoding	AX747492	lincRNA-HFE2	lincRNA	4510	chr1	+	145209144	146424095	AGGACTCACTGGGTAGATGTTATTCGACTCCTTCAGGTTATCTTGAACTGCCTGACTTAG	intron sense-overlapping	NM_005105	RBM8A	RNA-binding protein 8A	+	145507556	145513535	1929.36	12.1914	11.007
ASHG19A3L0002368	0.000421327	2.27261	up	5576.28	4996.36	4971.66	1977.25	2006.43	1872.39	1861.36	12.2747	12.1331	12.1663	10.8989	10.9844	11.0445	11.1003	noncoding	AX747492	lincRNA-HFE2	lincRNA	4510	chr1	+	145209144	146424095	AGGACTCACTGGGTAGATGTTATTCGACTCCTTCAGGTTATCTTGAACTGCCTGACTTAG	intronic antisense	NM_001097613	GPR89A	Golgi pH regulator A isoform 2	-	145764594	145827103	1929.36	12.1914	11.007
ASHG19A3L0002368	0.000421327	2.27261	up	5576.28	4996.36	4971.66	1977.25	2006.43	1872.39	1861.36	12.2747	12.1331	12.1663	10.8989	10.9844	11.0445	11.1003	noncoding	AX747492	lincRNA-HFE2	lincRNA	4510	chr1	+	145209144	146424095	AGGACTCACTGGGTAGATGTTATTCGACTCCTTCAGGTTATCTTGAACTGCCTGACTTAG	intron sense-overlapping	NM_213652	HFE2	hemojuvelin isoform c	+	145413190	145417545	1929.36	12.1914	11.007
ASHG19A3L0002368	0.000421327	2.27261	up	5576.28	4996.36	4971.66	1977.25	2006.43	1872.39	1861.36	12.2747	12.1331	12.1663	10.8989	10.9844	11.0445	11.1003	noncoding	AX747492	lincRNA-HFE2	lincRNA	4510	chr1	+	145209144	146424095	AGGACTCACTGGGTAGATGTTATTCGACTCCTTCAGGTTATCTTGAACTGCCTGACTTAG	intronic antisense	NM_183372	NBPF11	hypothetical protein LOC200030	-	146032541	146082633	1929.36	12.1914	11.007
ASHG19A3L0002368	0.000421327	2.27261	up	5576.28	4996.36	4971.66	1977.25	2006.43	1872.39	1861.36	12.2747	12.1331	12.1663	10.8989	10.9844	11.0445	11.1003	noncoding	AX747492	lincRNA-HFE2	lincRNA	4510	chr1	+	145209144	146424095	AGGACTCACTGGGTAGATGTTATTCGACTCCTTCAGGTTATCTTGAACTGCCTGACTTAG	intron sense-overlapping	NM_202004	HFE2	hemojuvelin isoform c	+	145413190	145417545	1929.36	12.1914	11.007
ASHG19A3L0002368	0.000421327	2.27261	up	5576.28	4996.36	4971.66	1977.25	2006.43	1872.39	1861.36	12.2747	12.1331	12.1663	10.8989	10.9844	11.0445	11.1003	noncoding	AX747492	lincRNA-HFE2	lincRNA	4510	chr1	+	145209144	146424095	AGGACTCACTGGGTAGATGTTATTCGACTCCTTCAGGTTATCTTGAACTGCCTGACTTAG	intron sense-overlapping	NM_002614	PDZK1	Na(+)/H(+) exchange regulatory cofactor NHE-RF3	+	145727665	145764206	1929.36	12.1914	11.007
ASHG19A3L0002368	0.000421327	2.27261	up	5576.28	4996.36	4971.66	1977.25	2006.43	1872.39	1861.36	12.2747	12.1331	12.1663	10.8989	10.9844	11.0445	11.1003	noncoding	AX747492	lincRNA-HFE2	lincRNA	4510	chr1	+	145209144	146424095	AGGACTCACTGGGTAGATGTTATTCGACTCCTTCAGGTTATCTTGAACTGCCTGACTTAG	intron sense-overlapping	NM_001039888	ANKRD34A	ankyrin repeat domain-containing protein 34A	+	145470507	145475647	1929.36	12.1914	11.007
ASHG19A3L0002368	0.000421327	2.27261	up	5576.28	4996.36	4971.66	1977.25	2006.43	1872.39	1861.36	12.2747	12.1331	12.1663	10.8989	10.9844	11.0445	11.1003	noncoding	AX747492	lincRNA-HFE2	lincRNA	4510	chr1	+	145209144	146424095	AGGACTCACTGGGTAGATGTTATTCGACTCCTTCAGGTTATCTTGAACTGCCTGACTTAG	intronic antisense	NM_001101663	NBPF24	hypothetical protein LOC728912	-	146034018	146068245	1929.36	12.1914	11.007
ASHG19A3L0002368	0.000421327	2.27261	up	5576.28	4996.36	4971.66	1977.25	2006.43	1872.39	1861.36	12.2747	12.1331	12.1663	10.8989	10.9844	11.0445	11.1003	noncoding	AX747492	lincRNA-HFE2	lincRNA	4510	chr1	+	145209144	146424095	AGGACTCACTGGGTAGATGTTATTCGACTCCTTCAGGTTATCTTGAACTGCCTGACTTAG	intron sense-overlapping	NM_001201326	PDZK1	Na(+)/H(+) exchange regulatory cofactor NHE-RF3	+	145727665	145764206	1929.36	12.1914	11.007
ASHG19A3L0002368	0.000421327	2.27261	up	5576.28	4996.36	4971.66	1977.25	2006.43	1872.39	1861.36	12.2747	12.1331	12.1663	10.8989	10.9844	11.0445	11.1003	noncoding	AX747492	lincRNA-HFE2	lincRNA	4510	chr1	+	145209144	146424095	AGGACTCACTGGGTAGATGTTATTCGACTCCTTCAGGTTATCTTGAACTGCCTGACTTAG	intron sense-overlapping	NM_001184795	PEX11B	peroxisomal membrane protein 11B isoform 2	+	145516559	145523732	1929.36	12.1914	11.007
ASHG19A3L0002368	0.000421327	2.27261	up	5576.28	4996.36	4971.66	1977.25	2006.43	1872.39	1861.36	12.2747	12.1331	12.1663	10.8989	10.9844	11.0445	11.1003	noncoding	AX747492	lincRNA-HFE2	lincRNA	4510	chr1	+	145209144	146424095	AGGACTCACTGGGTAGATGTTATTCGACTCCTTCAGGTTATCTTGAACTGCCTGACTTAG	intronic antisense	NM_006468	POLR3C	DNA-directed RNA polymerase III subunit RPC3	-	145592604	145610884	1929.36	12.1914	11.007
ASHG19A3L0002368	0.000421327	2.27261	up	5576.28	4996.36	4971.66	1977.25	2006.43	1872.39	1861.36	12.2747	12.1331	12.1663	10.8989	10.9844	11.0445	11.1003	noncoding	AX747492	lincRNA-HFE2	lincRNA	4510	chr1	+	145209144	146424095	AGGACTCACTGGGTAGATGTTATTCGACTCCTTCAGGTTATCTTGAACTGCCTGACTTAG	intron sense-overlapping	NM_006099	PIAS3	E3 SUMO-protein ligase PIAS3	+	145575987	145586546	1929.36	12.1914	11.007
ASHG19A3L0002610	6.19078e-06	6.83374	up	2419.65	2434.33	2371.55	348.739	297.446	330.544	331.854	11.0962	11.1094	11.1229	8.29564	8.37268	8.42941	8.24963	noncoding	CR599308	lincRNA-AEBP2-2	lincRNA	2138	chr12	+	19556999	19672288	GTTGGTCTTGAAAAGGAAAATAAAATCACTTTCTTGCTTGGTAAGCAAGAAGCCATATCG	exon sense-overlapping	NM_001114176	AEBP2	zinc finger protein AEBP2 isoform b	+	19592607	19675173	327.146	11.1095	8.33684
ASHG19A3L0002610	6.19078e-06	6.83374	up	2419.65	2434.33	2371.55	348.739	297.446	330.544	331.854	11.0962	11.1094	11.1229	8.29564	8.37268	8.42941	8.24963	noncoding	CR599308	lincRNA-AEBP2-2	lincRNA	2138	chr12	+	19556999	19672288	GTTGGTCTTGAAAAGGAAAATAAAATCACTTTCTTGCTTGGTAAGCAAGAAGCCATATCG	exon sense-overlapping	NM_153207	AEBP2	zinc finger protein AEBP2 isoform a	+	19592607	19675173	327.146	11.1095	8.33684
ASHG19A3L0002720	0.000105062	10.0268	up	299.451	310.532	280.167	27.0269	31.8512	34.1644	43.0395	8.24103	8.28049	8.18713	5.21157	4.97243	4.56906	4.88864	noncoding	BX102989	lincRNA-SPATA19-2	lincRNA	350	chr11	-	133778893	133781850	AAGAAGCCCAAAAAGTCATCCAAGGGCTCTTCGAAGTCAAAGAAACGATCCGACGATTCT	intergenic							34.0205	8.23622	4.91042
ASHG19A3L0000994	0.000152203	2.76674	up	488.412	494.625	486.705	172.115	182.543	167.938	205.798	8.89608	8.91007	8.93032	7.57028	7.34952	7.34767	7.50842	noncoding	chr18:71300370-71356620-	lincRNA-NETO1-3	lincRNA	56251	chr18	-	71300370	71356620	CCATTGAAAAGTATGTATTTAAATAGAAAATATTGTGTGTGTGTGTATGAATCCTAAGGT	intergenic							182.099	8.91216	7.44397
ASHG19A3A024697	0.00245893	2.19982	up	67.0496	51.5816	63.4031	38.1711	33.645	33.7207	31.2043	6.19836	5.85159	6.15522	4.71934	4.95115	5.0851	4.96843	noncoding	ENST00000504523	RP11-107E21.1	Ensembl	150	chr4	-	124783020	124783170	ATATTGACTGGAGCAGGCTACCCTCAGATTCTGAGGCCTGGTATAAAGCTTACATTGTCT	intergenic							34.1852	6.06839	4.931
ASHG19A3A049327	0.000436622	5.64087	up	73.7864	80.7815	67.8584	14.601	12.6267	20.7374	21.3082	6.33881	6.45669	6.24834	4.12654	4.21662	3.60589	3.4591	noncoding	ENST00000432147	RP4-735C1.5	Ensembl	355	chr1	-	110353265	110353620	GGTGGCCAAATAGAAGAGGTGATTCTTCAGGCTAAAAATGAATGAAGTCTGGTGAAAAAA	intergenic							17.3183	6.34795	3.85203
ASHG19A3A042726	4.46069e-05	9.59179	up	502.86	557.167	520.005	51.0881	56.2072	59.9126	67.4892	8.93237	9.0642	9.01561	5.88412	5.81055	5.53165	5.74272	noncoding	uc001jef.2	LOC643650	UCSC_knowngene	2876	chr10	-	47096454	47151400	TCTTAACAGCTGAGCAGTCTGTTTCTCCAATCAGGTTTCAAAGCCACTTCAACTGCACTG	intergenic							58.6743	9.00406	5.74226
ASHG19A3A000259	0.000168911	3.61863	up	134.728	138.026	184.776	57.2702	47.0958	42.6579	49.1305	7.16044	7.19199	7.6259	5.40603	5.30743	5.69258	5.4766	noncoding	ENST00000440570	AC004383.4	Ensembl	760	chrX	-	133677366	133680662	TCCAGTGGACGCCTGCAGGACCCAGGAACACTACATCAACACTGTTGGCGGGGACCTGGA	intergenic							49.0386	7.32611	5.47066
ASHG19A3A023202	0.0018039	2.23296	up	101.788	108.721	94.5809	63.8707	48.5542	55.9172	49.4597	6.78329	6.8646	6.70933	5.41579	5.70986	5.86078	5.52068	noncoding	ENST00000438195	RP4-794H19.4	Ensembl	306	chr1	+	59486259	59510286	ATCAGAAAGTCTGATTAAAGTAGAAGCATCATATTTCTATCAACGTATCCACTGTGCTTG	intergenic							54.4504	6.78574	5.62678
ASHG19A3A007504	0.00054789	3.92461	up	196.705	192.734	314.992	77.7777	63.817	60.0357	61.9843	7.68064	7.64167	8.34775	5.75734	5.81424	6.16052	5.93779	noncoding	NR_027349	MIR17HG	RefSeq_NR	927	chr13	+	92000073	92006829	TGGATGTGAAGATTTCCTCTAAAAGGCAGACCTGTCTAACTACAAGCCAGACTTGGGTTT	intergenic							65.9037	7.89002	5.91747
ASHG19A3A049135	3.76437e-06	4.70447	up	1408.31	1477.28	1352	284.671	264.675	273.467	302.019	10.3229	10.3901	10.3273	8.15561	8.09716	8.11679	8.08143	noncoding	AK096174		misc_RNA	2220	chr12	+	122232715	122234935	AGTGCTAAAAGTTCCCGTCACAAAAGCCAGACTCAGCAACAGCTCAAAACATTATTGTCC	intergenic							281.208	10.3468	8.11275
ASHG19A3A040165	0.00855997	2.08634	up	55.2349	47.2777	45.8146	21.3394	32.9105	32.979	34.2726	5.92464	5.73675	5.71062	4.86348	4.91872	4.20044	4.93614	noncoding	ENST00000442570	RP13-130D24.1	Ensembl	2450	chrX	-	97230879	97233640	ACAAAACAAAACCCTTGCTTCATGGGCAGCAGTATAACTGAAGAAGCTGAAGAACCAAGG	intergenic							30.3754	5.79067	4.72969
ASHG19A3A028448	0.000394436	3.14289	up	42.8915	37.6503	36.4816	16.5527	17.6698	14.2409	17.6027	5.56675	5.43099	5.39753	3.82473	3.61778	3.80732	4.00215	noncoding	CR749501		misc_RNA	4374	chr5	+	80201444	80205745	AATATAGTTCTAAGTAAAACTAAATTATGTTTCACAGTGAAGGAAGGGAAAGAAGGCAGG	intergenic							16.5165	5.46509	3.813
ASHG19A3A025628	0.000350898	8.35732	up	1934.67	1870.86	1626.31	194.187	174.259	284.63	185.793	10.7736	10.7338	10.583	7.41035	8.15382	7.5307	7.44015	noncoding	ENST00000394662	RP4-644F6.3	Ensembl	1740	chr1	+	89875877	89891802	ATTCAGAAGTTACAAGACCTGGAGAAAAAGTACTATGAGGAACCGAGGAAGGGGATACAG	intergenic							209.717	10.6968	7.63376
ASHG19A3A048669	0.000133047	4.48828	up	475.738	506.188	451.411	109.184	118.293	99.2848	121.76	8.8629	8.94018	8.83449	6.77449	6.56047	6.66214	6.85502	noncoding	NR_026656	LOC400043	RefSeq_NR	1411	chr12	+	54519854	54526619	AATCGTTTGAGAGAAGGACAAACTTTTGGCAGGATGGAAATCTAGATGAGCCTGTCCGGA	intergenic							112.131	8.87919	6.71303
ASHG19A3A029058	0.000181209	6.17729	up	99.0792	100.96	99.2038	25.3802	16.9798	18.4133	21.0786	6.74857	6.76744	6.77419	4.10817	4.03122	4.46698	3.93933	noncoding	AK128316		misc_RNA	4595	chr5	+	151186315	151190911	TTGAGTCTGGAATACATTCAGAACAAGGTTAACATTACAGTTCTTAATTTCCTTTAGGGC	intergenic							20.463	6.7634	4.13642
ASHG19A3A014420	0.0127934	4.93863	up	149.136	194.906	143.428	16.4692	48.2513	46.2588	59.1818	7.29531	7.6561	7.28313	5.68969	5.4291	3.79883	5.51199	noncoding	ENST00000427150	AC097721.1	Ensembl	1253	chr2	-	139169635	139170888	TGGGCTGTTTCATGCTGTGGATGTTAATGGAGATATTTGGGAAGATGGGATTGAAGACTA	intergenic							42.5403	7.41151	5.1074
ASHG19A3A025289	3.67244e-05	2.03119	down	20.1203	17.2827	15.1494	43.7306	41.8148	45.951	54.327	4.49697	4.42613	4.18646	5.55987	5.41909	5.2918	5.29795	noncoding	ENST00000505494	RP11-61G19.1	Ensembl	640	chr4	+	10686626	10699285	AGTTCAGCAGTCCAACAAGAATGGCTTCTCATGCCAGAGTAGACTCTTCTTGTATTTAGG	bidirectional	NM_052964	CLNK	cytokine-dependent hematopoietic cell linker	-	10491837	10686386	46.4559	4.36986	5.39218
ASHG19A3A038476	3.04809e-05	12.9078	down	347.447	342.976	281.682	3297.38	4186.12	4219.76	4111.36	8.44729	8.42265	8.19488	12.0494	12.1632	11.7931	12.1748	noncoding	ENST00000452496	ASS1P12	Ensembl	1227	chr9	+	32945993	32947220	TTGAAATTTGCTGAGCTGGTGTATACCGGTTTCTGGCATAGCCCTGAGTGTGAATTTGTC	intergenic							3953.66	8.35494	12.0451
ASHG19A3A019269	0.00079875	2.18854	down	8.72642	6.81538	6.16042	22.0651	19.6401	22.458	31.0505	3.33139	3.36675	3.01411	4.71206	4.34077	4.25208	4.16464	noncoding	uc002yyn.1	CR624487	UCSC_knowngene	1542	chr21	+	41099681	41102607	AACAATAACATCCAGGGAGTTCGTTTCTTGAGCAACGACCAGCTCTTTGCATAGCACGAA	intergenic							23.8034	3.23742	4.36739
ASHG19A3A050999	3.97093e-05	7.45905	down	7.94647	5.48155	5	47.1972	50.4276	44.3892	76.0754	3.19954	2.52095	2.39437	6.06608	5.36656	5.40555	5.57759	noncoding	uc001xsz.2	BC038792	UCSC_knowngene	364	chr14	-	77514515	77547598	TGAAGTTATGAAGAGATAGTTACTGGATCAAAATAGAAGAAATGATGCCTGGCAGCTAGA	intergenic							54.5224	2.70495	5.60394
ASHG19A3A029630	0.000698844	9.69881	down	18.0013	15.3057	11.8738	183.677	198.781	134.046	213.458	4.33586	4.27361	3.84998	7.62309	7.01126	7.4504	7.63907	noncoding	ENST00000458236	DAQB-335A13.8	Ensembl	2835	chr6	-	29702804	29716770	GGTTTAAAAGAAAATGCCCATTGACTAATGAATGAATAAACAACATGTAGTGTATTTCTA	intergenic							182.491	4.15315	7.43096
ASHG19A3A033174	3.85879e-05	2.6098	down	185.966	192.011	170.557	457.514	491.365	498.176	528.988	7.60186	7.6359	7.51394	9.00727	9.00548	8.84418	9.01442	noncoding	ENST00000424151	AC006378.3	Ensembl	314	chr7	-	93594721	93597702	GGGTACAAACTGTATTTCCAACACTTCTAGCCCTATATATACCTGTCAATGATATTATAC	intergenic							494.011	7.5839	8.96784
ASHG19A3A053974	0.00282382	2.68361	down	30.3495	19.6458	19.0009	79.8614	72.4093	76.9172	76.8611	5.08376	4.58441	4.49741	6.07983	6.18271	6.20338	6.11822	noncoding	AK021766		misc_RNA	2030	chr16	-	79709581	79711612	CTGAGTTCTTCTATACTTCACCATGGATACATGAACCTTAGCCCTAATGGAGCCTTAGAA	intergenic							76.5123	4.72186	6.14603
ASHG19A3L0000103	0.0109176	2.19186	down	453.793	432.159	400.085	710.923	1110.92	689.745	1192.79	8.80794	8.73297	8.67935	10.2467	9.49632	9.51497	10.231	noncoding	BF511988	lincRNA-TOMM20-1	lincRNA	521	chr1	+	235062091	235062598	ATTTACTTGAAAGAGACCTCATGCCAAAAAATGCATAGCATCATCCCCCACCTGCTCAGT	intergenic							926.095	8.74009	9.87224
ASHG19A3L0001078	3.83064e-05	2.31657	down	387.857	372.343	372.681	801.005	828.405	841.162	914.604	8.59457	8.5376	8.58581	9.85024	9.7865	9.70534	9.79653	noncoding	DC428746	lincRNA-ARHGAP15	lincRNA	577	chr2	+	143828536	143986326	TTCTAGTCGAAGAATTGAATTTTACAAAGAATCCAAGCAACAGGCTCTGTCCAATATGAA	exon sense-overlapping	NM_018460	ARHGAP15	rho GTPase-activating protein 15	+	143886898	144525921	846.294	8.57266	9.78465
ASHG19A3A045566	0.000253914	2.04007	down	78.1928	86.4085	79.4167	185.826	188.467	179.785	204.503	6.42295	6.54711	6.47215	7.55974	7.4561	7.46522	7.55636	noncoding	AK129753		misc_RNA	2007	chr11	-	86620031	86622038	TGTCCTCTTTTTACTGAAATAGGGGCCCTTGTTGATGGTAGTCACTGCCCATGCTGTTTA	intergenic							189.645	6.48074	7.50935
ASHG19A3A046958	0.00241558	2.55848	down	16.1773	7.53954	13.0202	43.6584	37.6973	39.7353	45.4084	4.17859	3.47281	3.97242	5.28885	5.19949	5.28987	5.14136	noncoding	BC029570		misc_RNA	883	chr11	+	112263840	112412637	GAGACAGAAGAACTAAAACTCAGAGTGACCACCAATGCAGCTATGAAACAGGTGGCAACA	intergenic							41.6249	3.8746	5.22989
ASHG19A3A010912	0.000959985	2.35962	down	1433.55	1346.37	1143.33	2675.43	2711.94	2300.14	2961.64	10.3486	10.2667	10.0963	11.5912	11.2796	11.4866	11.5457	noncoding	NR_027064	PLAC2	RefSeq_NR	3693	chr19	-	5558179	5568005	CAGCTTGGAACTAGATACAGAAATGCTGTTTTGAGAGTGTACTGAATAAAAGATTACATG	intergenic							2662.29	10.2372	11.4758
ASHG19A3A027345	0.0014785	2.02457	down	2391.83	1985.8	2012.71	3247.16	3469.69	4064.16	3996.89	11.0773	10.8179	10.89	12.007	12.1058	11.7723	11.8989	noncoding	NR_015360	FLJ33630	RefSeq_NR	2977	chr5	-	127357245	127418766	GAGCCAATACACTGAGGTCACTGGATAAATAAACAGATTCTTGCAAGTGCTTTGGAAATG	bidirectional	NM_001046	SLC12A2	solute carrier family 12 member 2	+	127419482	127525380	3694.48	10.9284	11.946
ASHG19A3L0000384	0.0204959	4.80807	down	60.986	59.8109	37.6301	523.088	140.008	460.163	184.436	6.05695	6.04586	5.43927	7.39936	8.87929	9.06046	7.11217	noncoding	chr11:44557524-44573924-	lincRNA-ALX4	lincRNA	16401	chr11	-	44557524	44573924	GTATAAGCACCCAGCACCTTACATACATATTGCTAGATCCTTTCTTTTCTCTCTCTATCT	intergenic							326.924	5.84736	8.11282
ASHG19A3A023200	0.00044151	6.27196	down	42.9047	22.5834	35.4476	239.013	242.278	226.769	255.007	5.56715	4.75476	5.35254	7.8997	7.80445	7.84821	7.94257	noncoding	ENST00000419531	RP4-794H19.2	Ensembl	2273	chr1	+	59250831	59366668	CCAATTCTGATCACTGCTCTTATGGTTTGTAATACATTATTTTGGGTTTGGATGATCCTG	intergenic							240.767	5.22482	7.87373
ASHG19A3A025216	4.43711e-05	2.54841	down	148.314	129.021	136.53	361.292	367.575	371.438	412.084	7.28845	7.10073	7.21371	8.61717	8.54548	8.48182	8.55777	noncoding	uc003gid.2	BC025734	UCSC_knowngene	2403	chr4	+	4543930	4712662	CTGCATCTTTTTTGTTCTTTCTGCTGTGAAAATAATTTTGTCGGAAAATGTAACCAGTGC	bidirectional	NM_016930	STX18	syntaxin-18	-	4420695	4543775	378.097	7.20096	8.55056
ASHG19A3L0003324	5.36825e-05	25.2882	down	7.13579	8.9746	7.7981	245.718	252.01	259.568	289.585	3.08192	3.65369	3.28585	8.09302	8.01182	7.89013	8.00853	noncoding	DN930364	lincRNA-C6orf70-2	lincRNA	387	chr6	-	170394056	170395067	GAAGGACCTTGGTGTTGAACGACCTTGGTGAAGGACCATGGTGATGAAGGACCTTGGTGA	intergenic							261.72	3.34048	8.00088
ASHG19A3L0000058	0.000222298	3.57848	down	18005.9	22476.9	18559.6	50548.9	50035.9	56343.4	60233.5	13.9066	14.2467	14.0136	15.9999	15.9396	15.8498	15.7905	noncoding	Y00062	lincRNA-ATP6V1G3-2	lincRNA	4597	chr1	+	198284952	198726330	GCTGTCTTTACATGGGGTTTTCAATTTTGCATGCTCGATTATTCCCTGTACAATATTTAA	intronic antisense	NM_133262	ATP6V1G3	V-type proton ATPase subunit G 3 isoform a	-	198492351	198510075	54290.4	14.0556	15.895
ASHG19A3L0000058	0.000222298	3.57848	down	18005.9	22476.9	18559.6	50548.9	50035.9	56343.4	60233.5	13.9066	14.2467	14.0136	15.9999	15.9396	15.8498	15.7905	noncoding	Y00062	lincRNA-ATP6V1G3-2	lincRNA	4597	chr1	+	198284952	198726330	GCTGTCTTTACATGGGGTTTTCAATTTTGCATGCTCGATTATTCCCTGTACAATATTTAA	exon sense-overlapping	NM_080921	PTPRC	receptor-type tyrosine-protein phosphatase C	+	198608136	198726545	54290.4	14.0556	15.895
ASHG19A3L0000058	0.000222298	3.57848	down	18005.9	22476.9	18559.6	50548.9	50035.9	56343.4	60233.5	13.9066	14.2467	14.0136	15.9999	15.9396	15.8498	15.7905	noncoding	Y00062	lincRNA-ATP6V1G3-2	lincRNA	4597	chr1	+	198284952	198726330	GCTGTCTTTACATGGGGTTTTCAATTTTGCATGCTCGATTATTCCCTGTACAATATTTAA	intron sense-overlapping	NM_133494	NEK7	serine/threonine-protein kinase Nek7	+	198126107	198291548	54290.4	14.0556	15.895
ASHG19A3L0000058	0.000222298	3.57848	down	18005.9	22476.9	18559.6	50548.9	50035.9	56343.4	60233.5	13.9066	14.2467	14.0136	15.9999	15.9396	15.8498	15.7905	noncoding	Y00062	lincRNA-ATP6V1G3-2	lincRNA	4597	chr1	+	198284952	198726330	GCTGTCTTTACATGGGGTTTTCAATTTTGCATGCTCGATTATTCCCTGTACAATATTTAA	exon sense-overlapping	NM_080923	PTPRC	receptor-type tyrosine-protein phosphatase C	+	198608136	198662334	54290.4	14.0556	15.895
ASHG19A3L0000058	0.000222298	3.57848	down	18005.9	22476.9	18559.6	50548.9	50035.9	56343.4	60233.5	13.9066	14.2467	14.0136	15.9999	15.9396	15.8498	15.7905	noncoding	Y00062	lincRNA-ATP6V1G3-2	lincRNA	4597	chr1	+	198284952	198726330	GCTGTCTTTACATGGGGTTTTCAATTTTGCATGCTCGATTATTCCCTGTACAATATTTAA	exon sense-overlapping	NM_002838	PTPRC	receptor-type tyrosine-protein phosphatase C	+	198608136	198726545	54290.4	14.0556	15.895
ASHG19A3L0000058	0.000222298	3.57848	down	18005.9	22476.9	18559.6	50548.9	50035.9	56343.4	60233.5	13.9066	14.2467	14.0136	15.9999	15.9396	15.8498	15.7905	noncoding	Y00062	lincRNA-ATP6V1G3-2	lincRNA	4597	chr1	+	198284952	198726330	GCTGTCTTTACATGGGGTTTTCAATTTTGCATGCTCGATTATTCCCTGTACAATATTTAA	intronic antisense	NM_133326	ATP6V1G3	V-type proton ATPase subunit G 3 isoform b	-	198492351	198510075	54290.4	14.0556	15.895
ASHG19A3L0003228	1.10662e-05	3.72629	down	90.1999	88.0494	76.9094	349.094	318.308	359.697	370.942	6.61135	6.57532	6.42173	8.45896	8.49583	8.43068	8.35001	noncoding	AK289744	lincRNA-SUN2	lincRNA	2725	chr22	-	39131913	39190148	ATGTAGCATATCATGGGGGACTGGGAAGTTGGGAGAGGTAGGACCTGACTGGTCTTGGCT	exon sense-overlapping	NM_005740	DNAL4	dynein light chain 4, axonemal	-	39174512	39190161	349.51	6.53613	8.43387
ASHG19A3L0003228	1.10662e-05	3.72629	down	90.1999	88.0494	76.9094	349.094	318.308	359.697	370.942	6.61135	6.57532	6.42173	8.45896	8.49583	8.43068	8.35001	noncoding	AK289744	lincRNA-SUN2	lincRNA	2725	chr22	-	39131913	39190148	ATGTAGCATATCATGGGGGACTGGGAAGTTGGGAGAGGTAGGACCTGACTGGTCTTGGCT	exon sense-overlapping	NM_001199579	SUN2	SUN domain-containing protein 2 isoform a	-	39130718	39152024	349.51	6.53613	8.43387
ASHG19A3L0003228	1.10662e-05	3.72629	down	90.1999	88.0494	76.9094	349.094	318.308	359.697	370.942	6.61135	6.57532	6.42173	8.45896	8.49583	8.43068	8.35001	noncoding	AK289744	lincRNA-SUN2	lincRNA	2725	chr22	-	39131913	39190148	ATGTAGCATATCATGGGGGACTGGGAAGTTGGGAGAGGTAGGACCTGACTGGTCTTGGCT	exon sense-overlapping	NM_001199580	SUN2	SUN domain-containing protein 2 isoform b	-	39130718	39151467	349.51	6.53613	8.43387
ASHG19A3L0003228	1.10662e-05	3.72629	down	90.1999	88.0494	76.9094	349.094	318.308	359.697	370.942	6.61135	6.57532	6.42173	8.45896	8.49583	8.43068	8.35001	noncoding	AK289744	lincRNA-SUN2	lincRNA	2725	chr22	-	39131913	39190148	ATGTAGCATATCATGGGGGACTGGGAAGTTGGGAGAGGTAGGACCTGACTGGTCTTGGCT	exon sense-overlapping	NM_015374	SUN2	SUN domain-containing protein 2 isoform b	-	39130718	39152024	349.51	6.53613	8.43387
ASHG19A3A014896	6.78585e-05	2.00226	down	23242.3	22823.5	21202.3	33506.1	34831.4	35250.8	34995.6	14.263	14.2678	14.202	15.1858	15.2804	15.2502	15.2673	noncoding	ENST00000415349	AC125238.4	Ensembl	1299	chr2	-	204629017	204630316	CCAACAGTGGATGGCAAAGTGGTGTCTGAGACCAATGACACCAAAGTTCTGAGACATTAA	intergenic							34646	14.2443	15.2459
ASHG19A3L0001378	0.000238538	3.01969	down	125.066	135.391	104.522	383.733	388.803	385.018	423.569	7.06105	7.16262	6.84741	8.66073	8.60006	8.56802	8.64358	noncoding	AJ493605	lincRNA-C3orf35	lincRNA	981	chr3	+	37427759	37459039	AAGGTGATTGCATGCTGGTGTCTTTAGCTAAAAATAAAGTTAATGTCTTTGGGGCAATCA	exon sense-overlapping	NM_178342	C3orf35	AP20 region protein 1 isoform E	+	37440967	37459865	395.281	7.0237	8.6181
ASHG19A3L0001378	0.000238538	3.01969	down	125.066	135.391	104.522	383.733	388.803	385.018	423.569	7.06105	7.16262	6.84741	8.66073	8.60006	8.56802	8.64358	noncoding	AJ493605	lincRNA-C3orf35	lincRNA	981	chr3	+	37427759	37459039	AAGGTGATTGCATGCTGGTGTCTTTAGCTAAAAATAAAGTTAATGTCTTTGGGGCAATCA	exon sense-overlapping	NM_178339	C3orf35	AP20 region protein 1 isoform B	+	37440967	37476988	395.281	7.0237	8.6181
ASHG19A3L0000165	0.0322989	2.05443	down	20.9875	18.5065	16.3548	77.0266	43.9343	45.1034	38.9775	4.55629	4.51103	4.2908	5.05871	5.39091	6.14613	5.37002	noncoding	DN918054	lincRNA-PDE4B	lincRNA	400	chr1	-	66890612	67423817	TCATCTGATGTTGCTGAACCTCCTGGACTTGAAGATTCAACAGATGGCTCCGCCATATTT	intron sense-overlapping	NM_207014	WDR78	WD repeat-containing protein 78 isoform 2	-	67303281	67390570	51.2605	4.4527	5.49144
ASHG19A3L0000165	0.0322989	2.05443	down	20.9875	18.5065	16.3548	77.0266	43.9343	45.1034	38.9775	4.55629	4.51103	4.2908	5.05871	5.39091	6.14613	5.37002	noncoding	DN918054	lincRNA-PDE4B	lincRNA	400	chr1	-	66890612	67423817	TCATCTGATGTTGCTGAACCTCCTGGACTTGAAGATTCAACAGATGGCTCCGCCATATTT	natural antisense	NM_001077704	MIER1	mesoderm induction early response protein 1	+	67395925	67454302	51.2605	4.4527	5.49144
ASHG19A3L0000165	0.0322989	2.05443	down	20.9875	18.5065	16.3548	77.0266	43.9343	45.1034	38.9775	4.55629	4.51103	4.2908	5.05871	5.39091	6.14613	5.37002	noncoding	DN918054	lincRNA-PDE4B	lincRNA	400	chr1	-	66890612	67423817	TCATCTGATGTTGCTGAACCTCCTGGACTTGAAGATTCAACAGATGGCTCCGCCATATTT	intron sense-overlapping	NM_024763	WDR78	WD repeat-containing protein 78 isoform 1	-	67278571	67390570	51.2605	4.4527	5.49144
ASHG19A3L0000165	0.0322989	2.05443	down	20.9875	18.5065	16.3548	77.0266	43.9343	45.1034	38.9775	4.55629	4.51103	4.2908	5.05871	5.39091	6.14613	5.37002	noncoding	DN918054	lincRNA-PDE4B	lincRNA	400	chr1	-	66890612	67423817	TCATCTGATGTTGCTGAACCTCCTGGACTTGAAGATTCAACAGATGGCTCCGCCATATTT	natural antisense	NM_001146111	MIER1	mesoderm induction early response protein 1	+	67390577	67454302	51.2605	4.4527	5.49144
ASHG19A3L0000165	0.0322989	2.05443	down	20.9875	18.5065	16.3548	77.0266	43.9343	45.1034	38.9775	4.55629	4.51103	4.2908	5.05871	5.39091	6.14613	5.37002	noncoding	DN918054	lincRNA-PDE4B	lincRNA	400	chr1	-	66890612	67423817	TCATCTGATGTTGCTGAACCTCCTGGACTTGAAGATTCAACAGATGGCTCCGCCATATTT	natural antisense	NM_001146110	MIER1	mesoderm induction early response protein 1	+	67390577	67454302	51.2605	4.4527	5.49144
ASHG19A3L0000165	0.0322989	2.05443	down	20.9875	18.5065	16.3548	77.0266	43.9343	45.1034	38.9775	4.55629	4.51103	4.2908	5.05871	5.39091	6.14613	5.37002	noncoding	DN918054	lincRNA-PDE4B	lincRNA	400	chr1	-	66890612	67423817	TCATCTGATGTTGCTGAACCTCCTGGACTTGAAGATTCAACAGATGGCTCCGCCATATTT	intronic antisense	NM_152665	TCTEX1D1	tctex1 domain-containing protein 1	+	67218139	67244730	51.2605	4.4527	5.49144
ASHG19A3L0000165	0.0322989	2.05443	down	20.9875	18.5065	16.3548	77.0266	43.9343	45.1034	38.9775	4.55629	4.51103	4.2908	5.05871	5.39091	6.14613	5.37002	noncoding	DN918054	lincRNA-PDE4B	lincRNA	400	chr1	-	66890612	67423817	TCATCTGATGTTGCTGAACCTCCTGGACTTGAAGATTCAACAGATGGCTCCGCCATATTT	natural antisense	NM_001146113	MIER1	mesoderm induction early response protein 1	+	67390577	67454302	51.2605	4.4527	5.49144
ASHG19A3L0000165	0.0322989	2.05443	down	20.9875	18.5065	16.3548	77.0266	43.9343	45.1034	38.9775	4.55629	4.51103	4.2908	5.05871	5.39091	6.14613	5.37002	noncoding	DN918054	lincRNA-PDE4B	lincRNA	400	chr1	-	66890612	67423817	TCATCTGATGTTGCTGAACCTCCTGGACTTGAAGATTCAACAGATGGCTCCGCCATATTT	natural antisense	NM_020948	MIER1	mesoderm induction early response protein 1	+	67390577	67454302	51.2605	4.4527	5.49144
ASHG19A3L0000165	0.0322989	2.05443	down	20.9875	18.5065	16.3548	77.0266	43.9343	45.1034	38.9775	4.55629	4.51103	4.2908	5.05871	5.39091	6.14613	5.37002	noncoding	DN918054	lincRNA-PDE4B	lincRNA	400	chr1	-	66890612	67423817	TCATCTGATGTTGCTGAACCTCCTGGACTTGAAGATTCAACAGATGGCTCCGCCATATTT	natural antisense	NM_001077701	MIER1	mesoderm induction early response protein 1	+	67395925	67454302	51.2605	4.4527	5.49144
ASHG19A3L0000165	0.0322989	2.05443	down	20.9875	18.5065	16.3548	77.0266	43.9343	45.1034	38.9775	4.55629	4.51103	4.2908	5.05871	5.39091	6.14613	5.37002	noncoding	DN918054	lincRNA-PDE4B	lincRNA	400	chr1	-	66890612	67423817	TCATCTGATGTTGCTGAACCTCCTGGACTTGAAGATTCAACAGATGGCTCCGCCATATTT	natural antisense	NM_001146112	MIER1	mesoderm induction early response protein 1	+	67390577	67454302	51.2605	4.4527	5.49144
ASHG19A3L0000165	0.0322989	2.05443	down	20.9875	18.5065	16.3548	77.0266	43.9343	45.1034	38.9775	4.55629	4.51103	4.2908	5.05871	5.39091	6.14613	5.37002	noncoding	DN918054	lincRNA-PDE4B	lincRNA	400	chr1	-	66890612	67423817	TCATCTGATGTTGCTGAACCTCCTGGACTTGAAGATTCAACAGATGGCTCCGCCATATTT	natural antisense	NM_001077700	MIER1	mesoderm induction early response protein 1	+	67390577	67454302	51.2605	4.4527	5.49144
ASHG19A3L0000165	0.0322989	2.05443	down	20.9875	18.5065	16.3548	77.0266	43.9343	45.1034	38.9775	4.55629	4.51103	4.2908	5.05871	5.39091	6.14613	5.37002	noncoding	DN918054	lincRNA-PDE4B	lincRNA	400	chr1	-	66890612	67423817	TCATCTGATGTTGCTGAACCTCCTGGACTTGAAGATTCAACAGATGGCTCCGCCATATTT	intron sense-overlapping	NM_005478	INSL5	insulin-like peptide INSL5 precursor	-	67263423	67266942	51.2605	4.4527	5.49144
ASHG19A3L0000165	0.0322989	2.05443	down	20.9875	18.5065	16.3548	77.0266	43.9343	45.1034	38.9775	4.55629	4.51103	4.2908	5.05871	5.39091	6.14613	5.37002	noncoding	DN918054	lincRNA-PDE4B	lincRNA	400	chr1	-	66890612	67423817	TCATCTGATGTTGCTGAACCTCCTGGACTTGAAGATTCAACAGATGGCTCCGCCATATTT	natural antisense	NM_001077703	MIER1	mesoderm induction early response protein 1	+	67390577	67454302	51.2605	4.4527	5.49144
ASHG19A3L0000165	0.0322989	2.05443	down	20.9875	18.5065	16.3548	77.0266	43.9343	45.1034	38.9775	4.55629	4.51103	4.2908	5.05871	5.39091	6.14613	5.37002	noncoding	DN918054	lincRNA-PDE4B	lincRNA	400	chr1	-	66890612	67423817	TCATCTGATGTTGCTGAACCTCCTGGACTTGAAGATTCAACAGATGGCTCCGCCATATTT	intronic antisense	NM_032291	SGIP1	SH3-containing GRB2-like protein 3-interacting	+	66999824	67210768	51.2605	4.4527	5.49144
ASHG19A3L0000165	0.0322989	2.05443	down	20.9875	18.5065	16.3548	77.0266	43.9343	45.1034	38.9775	4.55629	4.51103	4.2908	5.05871	5.39091	6.14613	5.37002	noncoding	DN918054	lincRNA-PDE4B	lincRNA	400	chr1	-	66890612	67423817	TCATCTGATGTTGCTGAACCTCCTGGACTTGAAGATTCAACAGATGGCTCCGCCATATTT	natural antisense	NM_001077702	MIER1	mesoderm induction early response protein 1	+	67390577	67454302	51.2605	4.4527	5.49144
ASHG19A3A048479	0.000116033	3.05941	down	19.2166	18.1723	15.8199	60.7095	69.1355	70.1331	78.5577	4.43246	4.48751	4.2463	6.11328	6.05459	5.78405	6.05612	noncoding	ENST00000500076	AC010198.2	Ensembl	1551	chr12	+	30908007	30933672	TACCTGTTAGAAAGCAATGTGCTTGATACTAGATACTGCCTGTTAAATGTGTTACATGAA	bidirectional	NM_032156	CAPRIN2	caprin-2 isoform 3	-	30862485	30907448	69.634	4.38876	6.00201
ASHG19A3A048479	0.000116033	3.05941	down	19.2166	18.1723	15.8199	60.7095	69.1355	70.1331	78.5577	4.43246	4.48751	4.2463	6.11328	6.05459	5.78405	6.05612	noncoding	ENST00000500076	AC010198.2	Ensembl	1551	chr12	+	30908007	30933672	TACCTGTTAGAAAGCAATGTGCTTGATACTAGATACTGCCTGTTAAATGTGTTACATGAA	bidirectional	NM_001002259	CAPRIN2	caprin-2 isoform 1	-	30862485	30907448	69.634	4.38876	6.00201
ASHG19A3A048479	0.000116033	3.05941	down	19.2166	18.1723	15.8199	60.7095	69.1355	70.1331	78.5577	4.43246	4.48751	4.2463	6.11328	6.05459	5.78405	6.05612	noncoding	ENST00000500076	AC010198.2	Ensembl	1551	chr12	+	30908007	30933672	TACCTGTTAGAAAGCAATGTGCTTGATACTAGATACTGCCTGTTAAATGTGTTACATGAA	bidirectional	NM_001206856	CAPRIN2	caprin-2 isoform 4	-	30862485	30907448	69.634	4.38876	6.00201
ASHG19A3A048479	0.000116033	3.05941	down	19.2166	18.1723	15.8199	60.7095	69.1355	70.1331	78.5577	4.43246	4.48751	4.2463	6.11328	6.05459	5.78405	6.05612	noncoding	ENST00000500076	AC010198.2	Ensembl	1551	chr12	+	30908007	30933672	TACCTGTTAGAAAGCAATGTGCTTGATACTAGATACTGCCTGTTAAATGTGTTACATGAA	bidirectional	NM_023925	CAPRIN2	caprin-2 isoform 2	-	30862485	30907448	69.634	4.38876	6.00201
ASHG19A3A032333	0.000779396	2.31334	down	26.954	27.1382	18.9239	66.1971	63.9552	70.2856	79.877	4.92094	4.99723	4.49041	6.14015	6.05793	5.91265	5.94062	noncoding	ENST00000439207	RP11-568A7.2	Ensembl	205	chr6	+	167655378	167659404	AAGAAAGAAAAGGCAAGAACGTCAGCGATGGCTCCACTGACTGATTAAGGCAAAGGAAGT	intergenic							70.0787	4.80286	6.01284
ASHG19A3A026461	0.0163415	3.12756	down	5	5.8861	5	18.8898	26.719	16.3566	28.6602	2.37766	3.09633	2.39437	4.58945	3.84442	4.01524	4.62217	noncoding	ENST00000503113	CTD-2245E15.3	Ensembl	692	chr5	-	1544221	1551825	TATGCAACCAAAATGTCCTGGGAATTCAGAGCCAAAGGCAGCATTCTTAGGAAATGCCTC	intergenic							22.6564	2.62278	4.26782
ASHG19A3L0001479	1.74964e-05	4.78454	down	1289.27	1147.13	1272.43	5040.36	5401.22	4826.59	5042.75	10.2064	10.0491	10.2385	12.3467	12.3584	12.4274	12.5598	noncoding	chr4:25089927-25101952+	lincRNA-SEPSECS-1	lincRNA	12026	chr4	+	25089927	25101952	TTTACTCATGAAAAAGAAAACAGTGAAGGCCCCCTCCTCATGGCTTTCTTCCAACAAACT	intergenic							5077.73	10.1647	12.423
ASHG19A3L0000856	0.00124476	2.61427	down	5	5.7831	5	16.6756	15.8322	19.6197	21.0949	2.37766	2.98474	2.39437	4.10989	4.13174	3.81992	3.82643	noncoding	DY655635	lincRNA-C16orf75-2	lincRNA	379	chr16	-	11477618	11478868	TCTGGGCACCAATGACAACGAAGCAGGCAATGAGCTGATGTTGCCGGATGGCTCTATGGC	intergenic							18.3056	2.58559	3.972
ASHG19A3A034256	0.0323971	2.9248	down	9.23159	5.23793	9.90054	29.3205	23.8653	31.7205	29.882	3.41071	2.33151	3.60478	4.65303	4.8622	4.68887	4.45192	noncoding	ENST00000424084	RP4-799D16.1	Ensembl	490	chr1	-	25370197	25439610	AGCGTTCTCTAGAGCGGTGGATCCCAAATGCCATCTGAGGACCAGCAACAGCAGCAGCAT	intergenic							28.6971	3.11567	4.664
ASHG19A3L0001803	0.000413174	3.11679	down	5	5.23226	5	19.4816	16.3958	20.7403	18.0648	2.37766	2.33129	2.39437	3.86803	4.21716	4.06102	3.88511	noncoding	DA877320	lincRNA-SUPT3H-2	lincRNA	582	chr6	+	44698872	44797742	TGTTTTGTAGACTCTGCTGGCTACAATCTAATAGAATGCTTAATCTGAATATTTCTGGTG	natural antisense	NM_003599	SUPT3H	transcription initiation protein SPT3 homolog	-	44797449	45345575	18.6706	2.36777	4.00783
ASHG19A3L0001803	0.000413174	3.11679	down	5	5.23226	5	19.4816	16.3958	20.7403	18.0648	2.37766	2.33129	2.39437	3.86803	4.21716	4.06102	3.88511	noncoding	DA877320	lincRNA-SUPT3H-2	lincRNA	582	chr6	+	44698872	44797742	TGTTTTGTAGACTCTGCTGGCTACAATCTAATAGAATGCTTAATCTGAATATTTCTGGTG	natural antisense	NM_181356	SUPT3H	transcription initiation protein SPT3 homolog	-	44796469	45345670	18.6706	2.36777	4.00783
ASHG19A3A048455	0.000774325	4.23224	down	5	5.43646	5	32.4938	23.968	20.0266	26.6869	2.37766	2.43889	2.39437	4.4758	4.16306	4.84224	4.45914	noncoding	uc001rhc.2	BC041929	UCSC_knowngene	1355	chr12	+	26287896	26334216	GAGGTCGTATCAGTAGATAAACTGCGATCTCTGTGGAAATCTTTTTCCTTATTTTTAAAG	intergenic							25.7938	2.40364	4.48506
ASHG19A3A033216	0.0113389	2.45427	down	120.359	92.37	97.837	367.864	214.363	315.425	243.855	7.01077	6.64689	6.75669	7.83053	8.30847	8.50852	7.75279	noncoding	uc001fuu.2	AF088076	UCSC_knowngene	423	chr1	+	159931073	159946734	TAAAAGGCCAAACCTTTGCTCCAACTTTCTCCTTAGCTTCCCTTTGGATCTGGAAAGCTG	intergenic							285.377	6.80478	8.10008
ASHG19A3A049512	0.00102705	2.16072	down	24.0893	19.1095	16.5192	49.1313	54.3775	56.9767	59.8279	4.76092	4.5503	4.30504	5.70244	5.73843	5.46713	5.69306	noncoding	ENST00000432701	RP11-269C23.3	Ensembl	858	chr13	-	44974486	44980002	ATTATTCTCCTCTATAGAGCCTCAAAAGTCAAGTCAAGTAGCAAGCACACTGTGCTCCAG	intergenic							55.0783	4.53875	5.65027
ASHG19A3A050297	0.000165532	13.429	down	90.6363	49.3112	64.3822	908.195	940.9	908.398	988.143	6.61777	5.78778	6.17516	9.96416	9.90306	9.90068	9.99551	noncoding	ENST00000419499	RP11-459P23.1	Ensembl	3340	chr13	+	74805593	74834113	AGGTCTGTCCTTTTTAATGCTCACCACACTTGAGGTTTCTGTTCACACTTCAAAGGCTGT	intergenic							936.409	6.19357	9.94085
ASHG19A3A016890	3.76509e-06	8.90326	down	327.165	322.621	302.238	2786.56	2590.42	2611.78	2712.91	8.36307	8.33693	8.29272	11.4474	11.4635	11.5511	11.479	noncoding	ENST00000429730	AC079767.4	Ensembl	492	chr2	+	208527098	208531748	TGATTTGGAGGCGTGTTCTCATTCAAAACCTTGCAAAATATAATTTCTTCTTGTCTGGGA	intergenic							2675.42	8.33091	11.4852
ASHG19A3L0000909	2.35415e-05	8.77859	down	1653.99	1554.77	1440.37	9568.86	11640.2	11774.1	12205.4	10.5424	10.4626	10.4107	13.6581	13.6796	13.3825	13.7034	noncoding	AB074181	lincRNA-CDRT4	lincRNA	2838	chr17	-	15339337	15466875	TTTGTGTCCATGGAACGTTTATAGACATGGAGGCAGGCAATAAATTCCTCCAATAATTAA	exon sense-overlapping	NM_145301	FAM18B2	hypothetical protein LOC201158 isoform 1	-	15405577	15466945	11297.1	10.4719	13.6059
ASHG19A3L0000909	2.35415e-05	8.77859	down	1653.99	1554.77	1440.37	9568.86	11640.2	11774.1	12205.4	10.5424	10.4626	10.4107	13.6581	13.6796	13.3825	13.7034	noncoding	AB074181	lincRNA-CDRT4	lincRNA	2838	chr17	-	15339337	15466875	TTTGTGTCCATGGAACGTTTATAGACATGGAGGCAGGCAATAAATTCCTCCAATAATTAA	exon sense-overlapping	NM_001135036	FAM18B2	hypothetical protein LOC201158 isoform 2	-	15440293	15466945	11297.1	10.4719	13.6059
ASHG19A3L0000909	2.35415e-05	8.77859	down	1653.99	1554.77	1440.37	9568.86	11640.2	11774.1	12205.4	10.5424	10.4626	10.4107	13.6581	13.6796	13.3825	13.7034	noncoding	AB074181	lincRNA-CDRT4	lincRNA	2838	chr17	-	15339337	15466875	TTTGTGTCCATGGAACGTTTATAGACATGGAGGCAGGCAATAAATTCCTCCAATAATTAA	exon sense-overlapping	NM_001204477	CDRT4	CMT1A duplicated region transcript 4 protein	-	15339331	15370925	11297.1	10.4719	13.6059
ASHG19A3L0000909	2.35415e-05	8.77859	down	1653.99	1554.77	1440.37	9568.86	11640.2	11774.1	12205.4	10.5424	10.4626	10.4107	13.6581	13.6796	13.3825	13.7034	noncoding	AB074181	lincRNA-CDRT4	lincRNA	2838	chr17	-	15339337	15466875	TTTGTGTCCATGGAACGTTTATAGACATGGAGGCAGGCAATAAATTCCTCCAATAATTAA	exon sense-overlapping	NM_001204478	FAM18B2-CDRT4	hypothetical protein LOC100533496	-	15339331	15466945	11297.1	10.4719	13.6059
ASHG19A3L0000605	0.0105392	2.16931	down	20.4736	11.8882	12.1023	46.7474	42.9423	36.8541	41.2774	4.52352	3.97632	3.87178	5.14829	5.08918	5.39166	5.33532	noncoding	AW361687	lincRNA-LNX2	lincRNA	601	chr13	+	28003341	28423867	AAAGCCAAGATGCCAAAATAAGGGGAACCAAAATGGTTTGTTGTGCAGCCAATGGGTTTT	intronic antisense	NM_001166263	MTIF3	translation initiation factor IF-3,	-	28009775	28024739	41.9553	4.12387	5.24111
ASHG19A3L0000605	0.0105392	2.16931	down	20.4736	11.8882	12.1023	46.7474	42.9423	36.8541	41.2774	4.52352	3.97632	3.87178	5.14829	5.08918	5.39166	5.33532	noncoding	AW361687	lincRNA-LNX2	lincRNA	601	chr13	+	28003341	28423867	AAAGCCAAGATGCCAAAATAAGGGGAACCAAAATGGTTTGTTGTGCAGCCAATGGGTTTT	intron sense-overlapping	NM_001206559	POLR1D	DNA-directed RNA polymerases I and III subunit	+	28194879	28241559	41.9553	4.12387	5.24111
ASHG19A3L0000605	0.0105392	2.16931	down	20.4736	11.8882	12.1023	46.7474	42.9423	36.8541	41.2774	4.52352	3.97632	3.87178	5.14829	5.08918	5.39166	5.33532	noncoding	AW361687	lincRNA-LNX2	lincRNA	601	chr13	+	28003341	28423867	AAAGCCAAGATGCCAAAATAAGGGGAACCAAAATGGTTTGTTGTGCAGCCAATGGGTTTT	intronic antisense	NM_001166261	MTIF3	translation initiation factor IF-3,	-	28009775	28024334	41.9553	4.12387	5.24111
ASHG19A3L0000605	0.0105392	2.16931	down	20.4736	11.8882	12.1023	46.7474	42.9423	36.8541	41.2774	4.52352	3.97632	3.87178	5.14829	5.08918	5.39166	5.33532	noncoding	AW361687	lincRNA-LNX2	lincRNA	601	chr13	+	28003341	28423867	AAAGCCAAGATGCCAAAATAAGGGGAACCAAAATGGTTTGTTGTGCAGCCAATGGGTTTT	intron sense-overlapping	NM_145657	GSX1	GS homeobox 1	+	28366779	28368089	41.9553	4.12387	5.24111
ASHG19A3L0000605	0.0105392	2.16931	down	20.4736	11.8882	12.1023	46.7474	42.9423	36.8541	41.2774	4.52352	3.97632	3.87178	5.14829	5.08918	5.39166	5.33532	noncoding	AW361687	lincRNA-LNX2	lincRNA	601	chr13	+	28003341	28423867	AAAGCCAAGATGCCAAAATAAGGGGAACCAAAATGGTTTGTTGTGCAGCCAATGGGTTTT	intronic antisense	NM_153371	LNX2	ligand of Numb protein X 2	-	28120049	28194720	41.9553	4.12387	5.24111
ASHG19A3L0000605	0.0105392	2.16931	down	20.4736	11.8882	12.1023	46.7474	42.9423	36.8541	41.2774	4.52352	3.97632	3.87178	5.14829	5.08918	5.39166	5.33532	noncoding	AW361687	lincRNA-LNX2	lincRNA	601	chr13	+	28003341	28423867	AAAGCCAAGATGCCAAAATAAGGGGAACCAAAATGGTTTGTTGTGCAGCCAATGGGTTTT	intronic antisense	NM_001166262	MTIF3	translation initiation factor IF-3,	-	28009775	28024326	41.9553	4.12387	5.24111
ASHG19A3L0000605	0.0105392	2.16931	down	20.4736	11.8882	12.1023	46.7474	42.9423	36.8541	41.2774	4.52352	3.97632	3.87178	5.14829	5.08918	5.39166	5.33532	noncoding	AW361687	lincRNA-LNX2	lincRNA	601	chr13	+	28003341	28423867	AAAGCCAAGATGCCAAAATAAGGGGAACCAAAATGGTTTGTTGTGCAGCCAATGGGTTTT	intronic antisense	NM_152912	MTIF3	translation initiation factor IF-3,	-	28009775	28024739	41.9553	4.12387	5.24111
ASHG19A3L0000605	0.0105392	2.16931	down	20.4736	11.8882	12.1023	46.7474	42.9423	36.8541	41.2774	4.52352	3.97632	3.87178	5.14829	5.08918	5.39166	5.33532	noncoding	AW361687	lincRNA-LNX2	lincRNA	601	chr13	+	28003341	28423867	AAAGCCAAGATGCCAAAATAAGGGGAACCAAAATGGTTTGTTGTGCAGCCAATGGGTTTT	intron sense-overlapping	NM_152705	POLR1D	DNA-directed RNA polymerases I and III subunit	+	28195915	28241559	41.9553	4.12387	5.24111
ASHG19A3L0000605	0.0105392	2.16931	down	20.4736	11.8882	12.1023	46.7474	42.9423	36.8541	41.2774	4.52352	3.97632	3.87178	5.14829	5.08918	5.39166	5.33532	noncoding	AW361687	lincRNA-LNX2	lincRNA	601	chr13	+	28003341	28423867	AAAGCCAAGATGCCAAAATAAGGGGAACCAAAATGGTTTGTTGTGCAGCCAATGGGTTTT	exon sense-overlapping	NM_002097	GTF3A	transcription factor IIIA	+	27998680	28009846	41.9553	4.12387	5.24111
ASHG19A3L0000605	0.0105392	2.16931	down	20.4736	11.8882	12.1023	46.7474	42.9423	36.8541	41.2774	4.52352	3.97632	3.87178	5.14829	5.08918	5.39166	5.33532	noncoding	AW361687	lincRNA-LNX2	lincRNA	601	chr13	+	28003341	28423867	AAAGCCAAGATGCCAAAATAAGGGGAACCAAAATGGTTTGTTGTGCAGCCAATGGGTTTT	intron sense-overlapping	NM_015972	POLR1D	DNA-directed RNA polymerases I and III subunit	+	28195915	28197590	41.9553	4.12387	5.24111
ASHG19A3L0002365	0.000942043	5.09017	down	5	5.69786	5	34.6033	30.4333	29.2155	39.5321	2.37766	2.86753	2.39437	5.07836	4.737	4.93883	4.82275	noncoding	chr1:149731347-149744257-	lincRNA-PPIAL4B-1	lincRNA	12911	chr1	-	149731347	149744257	GGTCAAATTATCATGCAGAAGGAGAAAAGGGTTTTGTTAACAATTTACACACCAATTGGA	intergenic							33.4461	2.54652	4.89423
ASHG19A3L0003163	0.0258132	2.59991	down	319.596	317.569	304.829	1318.05	502.131	987.971	613.539	8.32933	8.31595	8.30487	9.23137	10.0362	10.4603	9.05281	noncoding	chr2:223964483-223968702-	lincRNA-KCNE4-1	lincRNA	4220	chr2	-	223964483	223968702	GATTTGATGTCATAGCTTAAGCCCAAAGGCAAAAGAAAGTCCCTTCTCCTCATCCTCCAC	intergenic							855.422	8.31672	9.69518
ASHG19A3L0000490	5.08998e-05	27.6454	down	105.595	96.9641	71.8605	2623.55	2410.9	2587.22	2544.82	6.82949	6.71191	6.32879	11.3624	11.4513	11.4625	11.3733	noncoding	BX096603	lincRNA-CCND2-3	lincRNA	733	chr12	+	3980899	4019676	TGCAGTCTGTGCCTTTCATTGCCTTCCTGGAAAATAATAACTAAACTCTTCCTCAAAAAA	intronic antisense	NM_020367	PARP11	poly [ADP-ribose] polymerase 11	-	3918026	3982608	2541.62	6.6234	11.4124
ASHG19A3A040076	0.00047812	21.1257	down	16.4266	11.8877	25.5555	416.725	427.946	455.702	429.851	4.19985	3.97611	4.90178	8.68516	8.86374	8.69975	8.79204	noncoding	NR_001564	XIST	RefSeq_NR	19271	chrX	-	73040494	73072588	TTCGTAAATTAAATAGGTCTGGCCCAGAAGACCCACTCAATTGCCTTTGAGATTAAAAAA	intergenic							432.556	4.35925	8.76017
ASHG19A3L0002523	0.0100682	2.68084	down	11.5543	5.19078	5	25.1901	18.7085	16.4874	27.6515	3.71306	2.32965	2.39437	4.52772	3.85897	4.45607	4.0974	noncoding	CR742860	lincRNA-RBM19-3	lincRNA	474	chr12	-	114676774	114679575	GTGCCTGAAGCCTGGATAATAATAGAATGACAGCTGATGATTCATCAGTGCTCTTCAGAG	intergenic							22.0093	2.81236	4.23504
ASHG19A3A049932	0.000980581	2.64838	down	133.854	128.817	138.619	362.409	381.064	434.964	350.794	7.15153	7.09818	7.23557	8.3767	8.78835	8.4878	8.61464	noncoding	uc001uoi.2	AK054845	UCSC_knowngene	2406	chr13	+	22615113	22850657	CCTTCCAAATATATGTATGTTTCTTTTCTGAAGATAGACGTGTGTGTGTTTGTGTGTATC	intergenic							382.308	7.16176	8.56687
ASHG19A3A028497	1.14886e-05	6.05389	down	5	5.24721	5	34.7534	32.6402	32.3051	40.1135	2.37766	2.33187	2.39437	5.10271	4.88895	4.94589	4.92576	noncoding	ENST00000514092	CTC-454M9.1	Ensembl	501	chr5	+	88185261	88761799	TGAAGTGAAGTCCACTATGTGCTGGGCACACAGAGAATAGAGCATGAAACAAAAGCAACA	intronic antisense	NM_001131005	MEF2C	myocyte-specific enhancer factor 2C isoform 2	-	88014057	88199922	34.9531	2.36797	4.96583
ASHG19A3A028497	1.14886e-05	6.05389	down	5	5.24721	5	34.7534	32.6402	32.3051	40.1135	2.37766	2.33187	2.39437	5.10271	4.88895	4.94589	4.92576	noncoding	ENST00000514092	CTC-454M9.1	Ensembl	501	chr5	+	88185261	88761799	TGAAGTGAAGTCCACTATGTGCTGGGCACACAGAGAATAGAGCATGAAACAAAAGCAACA	intronic antisense	NM_001193347	MEF2C	myocyte-specific enhancer factor 2C isoform 3	-	88014057	88199922	34.9531	2.36797	4.96583
ASHG19A3L0000562	0.00175639	4.27915	down	9.23601	5.38474	6.34919	31.8396	42.0178	32.0639	40.9273	3.41139	2.35243	3.04468	5.13594	4.87719	4.81636	5.30448	noncoding	AX747187	lincRNA-NEDD1-2	lincRNA	2205	chr12	+	96933914	97024344	CCAGGATGCAAGTCTCTGTTTGATGGTAGTAATGAACAAGAAGAAATGCCAGAGGAGGAT	intergenic							36.7121	2.93617	5.03349
ASHG19A3L0000352	0.00716599	2.00678	down	160.058	133.855	157.946	256.871	366.289	286.226	411.222	7.39523	7.14891	7.40798	8.61483	8.16254	7.96038	8.55129	noncoding	chr11:2448349-2458849-	lincRNA-TRPM5	lincRNA	10501	chr11	-	2448349	2458849	TCTTGCCTCAGTTTCCTTATCTTTAGCAGGGAGGATCCCCGCTTCCCTGGGCTGTGAAGG	intergenic							330.152	7.31737	8.32226
ASHG19A3A031496	0.000409105	3.45189	down	12.7892	9.48917	13.8304	56.16	55.7968	57.6978	52.3649	3.85888	3.71509	4.0548	5.50601	5.75412	5.66242	5.73201	noncoding	NR_026938	LOC221442	RefSeq_NR	4585	chr6	+	41068772	41108567	TAGTTTTCAGTTCCAGACAAAACCATCCAGAACTCAGGAGGCCTTCTCAAGTGAATGCTG	exon sense-overlapping	NM_002505	NFYA	nuclear transcription factor Y subunit alpha	+	41040706	41070146	55.5049	3.87625	5.66364
ASHG19A3A031496	0.000409105	3.45189	down	12.7892	9.48917	13.8304	56.16	55.7968	57.6978	52.3649	3.85888	3.71509	4.0548	5.50601	5.75412	5.66242	5.73201	noncoding	NR_026938	LOC221442	RefSeq_NR	4585	chr6	+	41068772	41108567	TAGTTTTCAGTTCCAGACAAAACCATCCAGAACTCAGGAGGCCTTCTCAAGTGAATGCTG	exon sense-overlapping	NM_021705	NFYA	nuclear transcription factor Y subunit alpha	+	41040706	41070146	55.5049	3.87625	5.66364
ASHG19A3A022520	0.00024939	64.2619	down	14.2631	12.8157	28.4711	1304.69	1208.38	1257.41	1247.89	4.01182	4.06203	5.0539	10.3256	10.3994	10.4442	10.358	noncoding	uc003cmy.1	AK124776	UCSC_knowngene	4060	chr3	+	44159797	44163857	TATGGGTTGCTCTGAAATTAGCCTTTACACTTGGCATTGTGAAAAATCTTTCCAAATCAT	intergenic							1254.59	4.37592	10.3818
ASHG19A3L0000245	0.00265586	3.98449	down	17.3242	6.99338	11.1691	74.9549	60.176	52.7025	57.6588	4.27517	3.38947	3.77148	5.65046	5.62374	6.10317	5.84836	noncoding	DQ345519	lincRNA-ZNF32-4	lincRNA	628	chr10	-	44793037	44880497	GTGCAGTTGTTGAATTGTATGATCTGCCACTGAAGTAATTAGTGTGATAATTACTTGGAT	exon sense-overlapping	NM_001178134	CXCL12	stromal cell-derived factor 1 isoform delta	-	44872509	44880545	61.373	3.81204	5.80643
ASHG19A3L0000245	0.00265586	3.98449	down	17.3242	6.99338	11.1691	74.9549	60.176	52.7025	57.6588	4.27517	3.38947	3.77148	5.65046	5.62374	6.10317	5.84836	noncoding	DQ345519	lincRNA-ZNF32-4	lincRNA	628	chr10	-	44793037	44880497	GTGCAGTTGTTGAATTGTATGATCTGCCACTGAAGTAATTAGTGTGATAATTACTTGGAT	exon sense-overlapping	NM_001033886	CXCL12	stromal cell-derived factor 1 isoform gamma	-	44871314	44880545	61.373	3.81204	5.80643
ASHG19A3L0000245	0.00265586	3.98449	down	17.3242	6.99338	11.1691	74.9549	60.176	52.7025	57.6588	4.27517	3.38947	3.77148	5.65046	5.62374	6.10317	5.84836	noncoding	DQ345519	lincRNA-ZNF32-4	lincRNA	628	chr10	-	44793037	44880497	GTGCAGTTGTTGAATTGTATGATCTGCCACTGAAGTAATTAGTGTGATAATTACTTGGAT	exon sense-overlapping	NM_199168	CXCL12	stromal cell-derived factor 1 isoform alpha	-	44872509	44880545	61.373	3.81204	5.80643
ASHG19A3L0000245	0.00265586	3.98449	down	17.3242	6.99338	11.1691	74.9549	60.176	52.7025	57.6588	4.27517	3.38947	3.77148	5.65046	5.62374	6.10317	5.84836	noncoding	DQ345519	lincRNA-ZNF32-4	lincRNA	628	chr10	-	44793037	44880497	GTGCAGTTGTTGAATTGTATGATCTGCCACTGAAGTAATTAGTGTGATAATTACTTGGAT	exon sense-overlapping	NM_000609	CXCL12	stromal cell-derived factor 1 isoform beta	-	44865604	44880545	61.373	3.81204	5.80643
ASHG19A3L0003024	0.00138762	2.21875	down	345.052	286.645	264.625	704.672	567.218	674.019	667.638	8.43656	8.17203	8.10491	9.36498	9.45699	9.50325	9.22511	noncoding	DB325375	lincRNA-SIX6	lincRNA	551	chr14	-	61110277	61110827	TCGCATATTCCAGATGTGTTTAATAAGAAATTGCACAATGTGCCTCCTTCCGCCATCCTC	intergenic							653.386	8.23784	9.38758
ASHG19A3A033220	1.02981e-06	8.46551	down	53.605	55.855	53.0176	516.979	473.656	495.394	524.467	5.88168	5.95659	5.90828	8.99675	8.99475	9.04164	8.95532	noncoding	ENST00000423943	RP11-48O20.4	Ensembl	1113	chr1	+	159931013	159948851	AAGATGAACAACATGACCGGGAAGATTTCCTAATCTCACCACAGCCTGGCTCTACCTTAA	intergenic							502.624	5.91552	8.99711
ASHG19A3L0002479	0.0158641	2.29631	down	11.3126	11.4734	13.6868	26.411	49.9715	37.4412	40.8476	3.68491	3.93354	4.0399	5.13272	5.11095	4.53298	5.56508	noncoding	AW139121	lincRNA-DUSP27	lincRNA	577	chr1	-	167390174	167390743	TGCTTTCCACACACACATAAAAGCAAACTCATATCAGTTATGAGCAAATTAACCCATCAA	natural antisense	NM_001198786	POU2F1	POU domain, class 2, transcription factor 1	+	167190065	167396582	38.6678	3.88612	5.08543
ASHG19A3L0002479	0.0158641	2.29631	down	11.3126	11.4734	13.6868	26.411	49.9715	37.4412	40.8476	3.68491	3.93354	4.0399	5.13272	5.11095	4.53298	5.56508	noncoding	AW139121	lincRNA-DUSP27	lincRNA	577	chr1	-	167390174	167390743	TGCTTTCCACACACACATAAAAGCAAACTCATATCAGTTATGAGCAAATTAACCCATCAA	natural antisense	NM_001198783	POU2F1	POU domain, class 2, transcription factor 1	+	167298280	167396582	38.6678	3.88612	5.08543
ASHG19A3L0002479	0.0158641	2.29631	down	11.3126	11.4734	13.6868	26.411	49.9715	37.4412	40.8476	3.68491	3.93354	4.0399	5.13272	5.11095	4.53298	5.56508	noncoding	AW139121	lincRNA-DUSP27	lincRNA	577	chr1	-	167390174	167390743	TGCTTTCCACACACACATAAAAGCAAACTCATATCAGTTATGAGCAAATTAACCCATCAA	natural antisense	NM_002697	POU2F1	POU domain, class 2, transcription factor 1	+	167190065	167396582	38.6678	3.88612	5.08543
ASHG19A3L0002118	1.07873e-05	3.84057	down	19.5915	20.2242	20.4872	95.2132	92.827	103.798	97.0836	4.46132	4.62043	4.60062	6.4255	6.62692	6.46459	6.49142	noncoding	DN991958	lincRNA-DNAJC5B	lincRNA	662	chr8	+	66891455	66992718	AATACTTACCGACATTTCAAAGAGAAGCATATACGACAAGTACGGATCGCTGGGACTCTA	exon sense-overlapping	NM_033105	DNAJC5B	dnaJ homolog subfamily C member 5B	+	66933790	67012755	97.2303	4.56079	6.50211
ASHG19A3L0001430	3.71765e-06	54.27	down	538.84	496.491	443.979	24387.3	23040.1	21665	25259.6	9.02392	8.91664	8.81132	14.7228	14.5638	14.7486	14.6823	noncoding	AX747038	lincRNA-BANK1-2	lincRNA	3544	chr4	+	102341117	102995967	CAGAGTTCCAGTCATTATTGTTACATCATGTTTGCAGAAACCTTGTCTTATTTAGTGTCT	exon sense-overlapping	NM_001127507	BANK1	B-cell scaffold protein with ankyrin repeats	+	102711763	102995969	23588	8.91729	14.6794
ASHG19A3L0001430	3.71765e-06	54.27	down	538.84	496.491	443.979	24387.3	23040.1	21665	25259.6	9.02392	8.91664	8.81132	14.7228	14.5638	14.7486	14.6823	noncoding	AX747038	lincRNA-BANK1-2	lincRNA	3544	chr4	+	102341117	102995967	CAGAGTTCCAGTCATTATTGTTACATCATGTTTGCAGAAACCTTGTCTTATTTAGTGTCT	exon sense-overlapping	NM_017935	BANK1	B-cell scaffold protein with ankyrin repeats	+	102711763	102995969	23588	8.91729	14.6794
ASHG19A3L0001430	3.71765e-06	54.27	down	538.84	496.491	443.979	24387.3	23040.1	21665	25259.6	9.02392	8.91664	8.81132	14.7228	14.5638	14.7486	14.6823	noncoding	AX747038	lincRNA-BANK1-2	lincRNA	3544	chr4	+	102341117	102995967	CAGAGTTCCAGTCATTATTGTTACATCATGTTTGCAGAAACCTTGTCTTATTTAGTGTCT	exon sense-overlapping	NM_001083907	BANK1	B-cell scaffold protein with ankyrin repeats	+	102734982	102995969	23588	8.91729	14.6794
ASHG19A3L0001133	3.22552e-05	3.36136	down	91.3	81.4342	81.7563	312.355	312.733	312.791	325.834	6.62819	6.46754	6.51203	8.266	8.29642	8.25709	8.32037	noncoding	AL133087	lincRNA-PGAP1	lincRNA	2825	chr2	-	197831742	197987457	TTCCTATCATTGGTAACGCCCCAAGTAAAGCCTTTTTAATTAAAAATCTCTGGATGCTAT	exon sense-overlapping	NM_153697	ANKRD44	serine/threonine-protein phosphatase 6	-	197964194	198175521	315.928	6.53592	8.28497
ASHG19A3L0001133	3.22552e-05	3.36136	down	91.3	81.4342	81.7563	312.355	312.733	312.791	325.834	6.62819	6.46754	6.51203	8.266	8.29642	8.25709	8.32037	noncoding	AL133087	lincRNA-PGAP1	lincRNA	2825	chr2	-	197831742	197987457	TTCCTATCATTGGTAACGCCCCAAGTAAAGCCTTTTTAATTAAAAATCTCTGGATGCTAT	exon sense-overlapping	NM_001195144	ANKRD44	serine/threonine-protein phosphatase 6	-	197851385	198175521	315.928	6.53592	8.28497
ASHG19A3A007195	0.000862996	2.40036	down	46.2107	51.315	49.2654	131.935	138.337	128.55	159.427	5.67423	5.84526	5.81159	7.17999	6.94612	6.94365	7.09136	noncoding	NR_021491	FLJ42709	RefSeq_NR	1184	chr5	-	92746501	92916953	AACTTGCAGCTCATCTCTATTGATGGTGAAACAGTCGCAAATGGAATTCCAAGAAACATT	intergenic							139.562	5.77703	7.04028
ASHG19A3L0003451	0.0103206	2.83103	down	421.464	339.384	447.635	1336.96	725.387	867.643	1597.04	8.70971	8.4063	8.82231	10.677	9.82803	10.484	9.60074	noncoding	chr10:112147868-112175330+	lincRNA-DUSP5-3	lincRNA	27463	chr10	+	112147868	112175330	TTCTACTTCAGTCTGTATCCAGCCCCTGCACCCAGTATAATGTAGTAGAGTATTTCTCGG	intergenic							1131.76	8.64611	10.1474
ASHG19A3A015365	3.8843e-05	8.38916	down	44.9228	45.5485	39.567	427.825	414.022	392.612	405.671	5.63296	5.68451	5.50569	8.59713	8.62965	8.73748	8.74072	noncoding	ENST00000438692	AC013400.2	Ensembl	2239	chr2	+	20068620	20077154	TGAAGAGTGAAAGCATGTTGAACACCAAGATGCTCTCCAAAGATGGAGTCCTTCTCTTCT	intergenic							410.032	5.60772	8.67625
ASHG19A3A029629	4.79008e-05	6.17942	down	21.0399	20.421	20.6306	177.339	157.745	139.804	156.731	4.55993	4.63443	4.60992	7.15608	7.07299	7.39543	7.2911	noncoding	NR_026972	LOC285830	RefSeq_NR	1914	chr6	-	29694377	29716826	TGCCCTGTAATGAAGTCATGTGTGCACATATCATCACTTCTGCATGCAGTCTCATGGGAA	natural antisense	NM_001098479	HLA-F	HLA class I histocompatibility antigen, alpha	+	29691116	29695073	157.905	4.60143	7.2289
ASHG19A3L0003199	0.0327612	2.03622	down	32.7751	28.173	26.9574	56.4808	88.7816	48.7416	123.24	5.19096	5.04528	4.98005	6.79117	5.5063	5.67255	6.42195	noncoding	chr8:108001782-108008049+	lincRNA-ANGPT1-2	lincRNA	6268	chr8	+	108001782	108008049	CCCTGTCTCAATATAAGCAATGCATTAATACATGTGAGTGACTGGATATAATCTAAACAG	intergenic							79.3111	5.0721	6.09799
ASHG19A3A051743	7.69875e-05	8.20149	down	5	5.19296	5	45.8557	46.8063	52.0851	42.1204	2.37766	2.32973	2.39437	5.17769	5.60352	5.36349	5.46786	noncoding	uc001yfd.1	BX247990	UCSC_knowngene	1858	chr14	+	96181819	96223116	ATCAATGGCCCTAGGATCCAGAATGCCACAAACAATGGAGCAAGAATCAGATCTGTGTGT	intergenic							46.7169	2.36725	5.40314
ASHG19A3L0000967	0.00196152	4.88638	down	159.431	185.912	165.288	546.208	1022.44	915.046	969.261	7.38779	7.59406	7.46875	9.9345	9.91516	9.12429	10.1153	noncoding	chr18:47271277-47283077-	lincRNA-LIPG-2	lincRNA	11801	chr18	-	47271277	47283077	TTAGTCCTGACCACCCTTCCTTCTCTTGGAGGAAGACTTTCCTTCATTCAGGTACTTACA	intergenic							863.238	7.48353	9.7723
ASHG19A3L0001357	0.0260063	7.74396	down	5	10.3288	5	129.338	57.7997	30.1626	62.3081	2.37766	3.80989	2.39437	5.76566	4.78799	6.91227	5.78891	noncoding	chr3:187039181-187056506-	lincRNA-MASP1	lincRNA	17326	chr3	-	187039181	187056506	CAGGCTCTGCACAGTCTGTCAGGATATTCCAGTGATCAGTAGAAAATACAAATCATTTAA	intergenic							69.902	2.86064	5.81371
ASHG19A3L0001770	0.0265845	2.65745	down	21.9814	30.6847	19.7245	135.107	74.0746	72.0819	52.7185	4.62261	5.15636	4.55021	5.51655	6.09562	6.97866	6.1549	noncoding	AA317289	lincRNA-DLL1-1	lincRNA	416	chr6	+	170241398	170241810	TTACGGTATGCCCTTAGTCTGGCTGAGTGAAACCAACCAGGGCGGAGGAAGCATTCCGAT	intergenic							83.4954	4.77639	6.18643
ASHG19A3A029945	5.95258e-05	2.07834	down	2291.27	2317.13	2134.44	4121.72	3782.87	3948.81	4072.53	11.0206	11.0381	10.9679	12.036	12.0642	12.1241	12.0328	noncoding	AL832122		misc_RNA	5572	chr1	-	23607802	23613245	GGTAGGTAATTTACTTTCTATTGTACTCATAGTTTGTTTGAAACCTCTTCACCTCTATCC	intergenic							3981.48	11.0089	12.0643
ASHG19A3A025724	6.73005e-05	5.1362	down	50.2949	41.7968	49.0338	268.873	270.019	278.449	284.477	5.79134	5.5689	5.80419	8.06589	8.12235	8.02817	8.11232	noncoding	uc003hlr.1	BC036848	UCSC_knowngene	756	chr4	+	79892901	80229698	CCTGGCTATCCTGGAGTTTTCCAGTTCATCAGCCATCCAATAAAAATGATGTCAAGCCTG	intergenic							275.455	5.72148	8.08218
ASHG19A3L0002327	0.000515834	2.01597	down	72.9448	77.8049	73.7724	157.266	177.368	172.985	188.936	6.32187	6.40627	6.36785	7.43337	7.3975	7.20938	7.46697	noncoding	BX096636	lincRNA-STARD8	lincRNA	670	chrX	+	67791644	67792306	TGGCAAGATGTTAGTGAATCTAACTGGTGTGTATATGGGTGTTCAATGTGCTATTTTTTC	intergenic							174.139	6.36533	7.3768
ASHG19A3L0003057	0.0412495	2.15848	down	96.4631	143.947	117.091	490.439	250.525	204.02	237.372	6.70949	7.24906	7.00127	7.78787	7.64361	8.95734	7.99767	noncoding	FN091184	lincRNA-INHBA-1	lincRNA	83	chr7	+	41046322	41046402	GAAAGGCCTGTTGTAAAATACTTGGTTCTGTCTTGGATACTCACCCTTCTCCTTCTTGAC	intergenic							295.589	6.98661	8.09662
ASHG19A3A044503	0.00286372	5.64905	down	90.8247	73.6401	92.2253	909.667	475.978	416.371	397.126	6.6206	6.3302	6.67214	8.56544	8.72174	9.90386	8.96491	noncoding	AK130806		misc_RNA	1439	chr10	+	114590927	114592210	TACAACACGTAAAATGTGAAAAAGACCTCTGACCCTGAAAGTCTCATTCTGCCCAGGCCA	intergenic							549.785	6.54098	9.03899
ASHG19A3A055200	0.00318571	2.37593	down	70.1313	43.9827	43.4751	149.944	130.625	143.511	153.404	6.26524	5.63541	5.6376	7.12615	7.11209	7.13517	7.0049	noncoding	ENST00000508111	RP11-93L9.1	Ensembl	645	chr4	+	124571445	124851561	AGACCAGCGTTCTCAAATGAAGGTGCCAGATCTGCTGTTAGAGGAGAATTCTTCTGTCCT	intergenic							144.371	5.84609	7.09458
ASHG19A3L0002151	0.00117937	4.47395	down	11.5866	10.7091	15.9084	81.4041	62.3579	80.8071	73.6515	3.71699	3.84737	4.25468	6.01495	6.25213	6.23363	5.9042	noncoding	CD518212	lincRNA-PPP1R3B-2	lincRNA	594	chr8	+	8978376	8978955	TCAAAGTAGGGGTGTTGATGTTCTTCCGGAATGTGCAGCAGTTGCTGATAATATTGGCTG	intergenic							74.5552	3.93968	6.10123
ASHG19A3L0001132	0.0443588	4.08882	down	5	19.3126	5	35.6596	42.5505	30.693	50.7951	2.37766	4.56402	2.39437	5.4566	4.81368	4.9821	5.32241	noncoding	chr2:196006180-196035580+	lincRNA-SLC39A10-4	lincRNA	29401	chr2	+	196006180	196035580	TCCTAGTAAAGAAGTCCTTTTATTGTTTCAAAGTCTTCTCATGATCTTAAAGGTGCAGCC	intergenic							39.9246	3.11201	5.1437
ASHG19A3A019187	0.000129432	2.36318	down	331.537	303.01	328.399	756.035	718.872	743.997	745.36	8.38399	8.24781	8.40705	9.53061	9.61122	9.61624	9.58998	noncoding	ENST00000427447	AP000569.8	Ensembl	9124	chr21	+	35303463	35349992	CTATGTGAGATTGTATTGCAGGGCTCACATTTATTCTCTCAGCAGCTCATTGCACAGACA	intergenic							741.066	8.34628	9.58702
ASHG19A3A041680	6.97846e-05	2.72964	down	183.341	156.63	169.546	521.221	478.41	436.402	494.267	7.57948	7.36227	7.5059	8.9067	8.79324	9.05378	8.97131	noncoding	NR_027456	LOC100272228	RefSeq_NR	3285	chrX	+	149106765	149185018	ATGGATTTCCAAATCTGACACACCATAGCCTGAATTCTCACCAGTTTGCTCCTGGAAAGG	bidirectional	NM_001013845	CXorf40B	protein CXorf40B	-	149100414	149106716	482.575	7.48255	8.93126
ASHG19A3A045869	0.00139591	3.05884	down	7.6927	8.15899	7.93871	36.3316	39.0535	29.9369	33.6151	3.1607	3.55211	3.3095	4.83234	4.77653	5.0104	5.19574	noncoding	ENST00000511090	AP003500.1	Ensembl	973	chr11	-	129482019	129487164	CTCTAAAGGGCCCAGTAGTCATTCCTCAGTGAAAAGTGCCAATTCATTGCTTGGTAGATT	intergenic							34.7343	3.34077	4.95375
ASHG19A3L0001759	0.0467907	2.75614	down	457.507	462.149	416.44	1801.59	616.506	2126.3	777.375	8.81871	8.82406	8.7316	9.59277	11.1612	10.9074	9.35506	noncoding	AI354683	lincRNA-FRMD1-1	lincRNA	439	chr6	-	168501721	168502166	TGGGGTCCCTGCCCCGGGCTAAGTGCACCCTGCCTGCCTTCTGGAGGGAGCATTGGGCTT	intergenic							1330.44	8.79146	10.2541
ASHG19A3A040585	0.0002098	2.54464	down	78.2656	70.0542	69.9568	222.347	214.779	195.899	213.16	6.42403	6.26385	6.29063	7.62079	7.58367	7.73489	7.75517	noncoding	uc001hor.1	CR625980	UCSC_knowngene	1385	chr1	+	224622613	224709674	CTAGCAATGGAGTGTTACAAGTAATAGACCCTAAAATGTGGATTGGCAAATTGCAGGTAG	bidirectional	NM_001115113	WDR26	WD repeat-containing protein 26 isoform b	-	224572844	224622001	211.546	6.32617	7.67363
ASHG19A3A040585	0.0002098	2.54464	down	78.2656	70.0542	69.9568	222.347	214.779	195.899	213.16	6.42403	6.26385	6.29063	7.62079	7.58367	7.73489	7.75517	noncoding	uc001hor.1	CR625980	UCSC_knowngene	1385	chr1	+	224622613	224709674	CTAGCAATGGAGTGTTACAAGTAATAGACCCTAAAATGTGGATTGGCAAATTGCAGGTAG	bidirectional	NM_025160	WDR26	WD repeat-containing protein 26 isoform a	-	224572844	224622001	211.546	6.32617	7.67363
ASHG19A3A049571	0.015617	2.63082	down	17.7088	16.7131	23.6714	48.6322	62.9474	72.757	77.3256	4.31066	4.38338	4.79121	6.08883	6.10579	5.44927	5.91849	noncoding	CR625221		misc_RNA	1009	chr13	-	50952494	50953503	TAATTCGATGCTACTGCTGCCAAAGCCACATGGGATGCAAATGAAACTGGGTTCACCTTT	intergenic							65.4155	4.49508	5.8906
ASHG19A3L0001662	0.0229776	2.25886	down	63.0578	48.3134	79.7397	123.024	200.268	136.665	215.501	6.10737	5.76215	6.47879	7.63629	7.03767	6.84326	7.64955	noncoding	AW845646	lincRNA-MAP3K1-3	lincRNA	612	chr5	+	55896358	55896968	TGATGCTTCTTTGGCCTCATTCTTCTCTGGCTTTCAGAGACCAGCCAGAAAATCACACAT	intergenic							168.864	6.1161	7.29169
ASHG19A3A032615	8.73144e-05	8.13758	down	5	5.1781	5	50.1194	39.3343	51.6924	44.6357	2.37766	2.32914	2.39437	5.26734	5.59292	5.50053	5.20582	noncoding	ENST00000447171	AC007255.8	Ensembl	889	chr7	-	29554384	29603279	ATGTTTGCGAGTTTCAGGCGCCCTTAGTTGAAAGGCTGTAATTAACAAGTCCGCTGTTTG	bidirectional	NM_175887	PRR15	proline-rich protein 15	+	29603426	29606911	46.4454	2.36706	5.39165
ASHG19A3A020284	2.7745e-06	3.47407	down	484.832	470.295	453.497	1517.05	1485.65	1502.41	1540.97	8.88666	8.84558	8.83925	10.6305	10.6556	10.6633	10.6658	noncoding	NR_026963	LOC284900	RefSeq_NR	5125	chr22	+	28315363	28398665	AACCCAAAGTGACACATGCCTGGCGGGATGTTCAGTCTCTGTAAACCCATATGGTTTTTT	bidirectional	NM_012399	PITPNB	phosphatidylinositol transfer protein beta	-	28247656	28315255	1511.52	8.85716	10.6538
ASHG19A3A020284	2.7745e-06	3.47407	down	484.832	470.295	453.497	1517.05	1485.65	1502.41	1540.97	8.88666	8.84558	8.83925	10.6305	10.6556	10.6633	10.6658	noncoding	NR_026963	LOC284900	RefSeq_NR	5125	chr22	+	28315363	28398665	AACCCAAAGTGACACATGCCTGGCGGGATGTTCAGTCTCTGTAAACCCATATGGTTTTTT	natural antisense	NM_001145418	TTC28	tetratricopeptide repeat protein 28	-	28374001	29075853	1511.52	8.85716	10.6538
ASHG19A3L0003381	0.0131678	2.4618	down	207.778	169.889	229.838	512.223	633.397	278.928	724.014	7.74912	7.47048	7.90875	9.48898	8.12447	9.02624	9.39697	noncoding	chr5:141438289-141445854+	lincRNA-NDFIP1	lincRNA	7566	chr5	+	141438289	141445854	ACCCCTACCTTGAGTATCTCCTCAGACCATATATTCCCCTGGGATTTCCTCTTCATTTTC	intergenic							537.14	7.70945	9.00916
ASHG19A3L0000636	0.00707059	3.47943	down	129.729	113.972	115.627	463.977	468.005	252.136	702.622	7.10871	6.92925	6.98373	9.44623	7.97018	8.86903	8.93888	noncoding	BE048608	lincRNA-RCBTB2-2	lincRNA	282	chr13	-	49130167	49130440	GACCTCAATTCTCATTGTCAGCTCAATTCCTCAGTTCTCTTCCATGTGATCTCAAGGCTT	intergenic							471.685	7.00723	8.80608
ASHG19A3L0000012	1.06082e-06	39.0053	down	90.6409	91.8084	95.8392	3798.18	3429.11	3615.53	3881.99	6.61784	6.63671	6.72953	11.9693	11.9343	11.999	11.8852	noncoding	BC043564	lincRNA-KCNA2-1	lincRNA	2022	chr1	-	111136202	111174096	CATGGGTGTACATAGACTTCATAGAGCTCCACAGTCTTTTGTAAATATTGACACAAGTAA	exon sense-overlapping	NM_004974	KCNA2	potassium voltage-gated channel subfamily A	-	111145775	111148975	3681.2	6.66136	11.947
ASHG19A3L0000012	1.06082e-06	39.0053	down	90.6409	91.8084	95.8392	3798.18	3429.11	3615.53	3881.99	6.61784	6.63671	6.72953	11.9693	11.9343	11.999	11.8852	noncoding	BC043564	lincRNA-KCNA2-1	lincRNA	2022	chr1	-	111136202	111174096	CATGGGTGTACATAGACTTCATAGAGCTCCACAGTCTTTTGTAAATATTGACACAAGTAA	exon sense-overlapping	NM_001204269	KCNA2	potassium voltage-gated channel subfamily A	-	111136201	111174096	3681.2	6.66136	11.947
ASHG19A3A048670	2.7211e-07	5.51886	down	48.7047	46.0731	43.5974	287.55	272.312	292.269	309.321	5.74809	5.70035	5.64167	8.19036	8.19796	8.13165	8.12433	noncoding	ENST00000504210	RP11-834C11.8	Ensembl	403	chr12	+	54556922	54562379	CCAACAGGGAAACTGAATGCCTAAGACATTCATTCATTCATTTACCCATTCAATAAATAC	intergenic							290.363	5.6967	8.16107
ASHG19A3L0001722	3.09277e-06	3.02364	down	1329.91	1392.39	1253.22	3329.82	3325.5	3477.53	3661.16	10.2487	10.3104	10.2184	11.894	11.8753	11.8084	11.8443	noncoding	AX746929	lincRNA-SAMD3	lincRNA	2376	chr6	-	130465462	130686570	GGTTGTGGTAGAGGTAGGTATGAGAAAGTCATCTTGTATTTATAGATGCTAATGAATTTC	exon sense-overlapping	NM_001017373	SAMD3	sterile alpha motif domain-containing protein 3	-	130465460	130544099	3448.5	10.2592	11.8555
ASHG19A3L0001722	3.09277e-06	3.02364	down	1329.91	1392.39	1253.22	3329.82	3325.5	3477.53	3661.16	10.2487	10.3104	10.2184	11.894	11.8753	11.8084	11.8443	noncoding	AX746929	lincRNA-SAMD3	lincRNA	2376	chr6	-	130465462	130686570	GGTTGTGGTAGAGGTAGGTATGAGAAAGTCATCTTGTATTTATAGATGCTAATGAATTTC	exon sense-overlapping	NM_152552	SAMD3	sterile alpha motif domain-containing protein 3	-	130504132	130536494	3448.5	10.2592	11.8555
ASHG19A3L0002044	0.00957825	2.58603	down	10.7258	8.66816	14.579	36.8775	35.6411	38.5531	48.3338	3.61676	3.61595	4.12575	5.38271	5.15508	5.03116	5.05863	noncoding	BG195666	lincRNA-NAT1-1	lincRNA	580	chr8	+	17984343	17984911	GTATAACTCTAGTGAATCCCCAGTAAGTGCAAATTAAAATGGTGACCTGTATCTTTAAAG	intergenic							39.8514	3.78615	5.15689
ASHG19A3L0000422	0.0169328	2.3393	down	16.7723	20.7934	20.3874	63.3354	57.8174	40.4885	73.7194	4.23117	4.65508	4.59556	6.01698	5.22578	5.84813	5.78916	noncoding	CD174643	lincRNA-AMOTL1-2	lincRNA	690	chr11	+	94380374	94384794	CAAAGGAAGATCAGCCAAGCCTCAACATAATCTCATAAAAATTCATCAAATATCCCATTG	intergenic							58.8402	4.49394	5.72001
ASHG19A3A050759	0.00137759	4.23393	down	41.423	25.8471	41.4498	185.421	169.07	182.195	178.473	5.51507	4.92922	5.57158	7.34995	7.47474	7.46225	7.39554	noncoding	uc001wxl.2	BC084561	UCSC_knowngene	2301	chr14	-	50504312	50507947	AATATGACCTGAAGCAGATGGATGCACTCACATAAGAAACATCACCTGTGGCCTTCATCG	intergenic							178.79	5.33862	7.42062
ASHG19A3L0001451	0.017482	2.44041	down	8.59679	8.77228	7.2797	21.31	22.1548	27.746	51.3815	3.31094	3.62942	3.20425	5.47437	4.661	4.19747	4.34182	noncoding	chr4:114709776-114720551+	lincRNA-ARSJ-1	lincRNA	10776	chr4	+	114709776	114720551	GAAATGTTTTGGGCCAAAATACCATCACCACTGTTGTTTGAATAACAATTTAAATGGCCT	intergenic							30.6481	3.38154	4.66866
ASHG19A3L0000855	0.00290954	2.4875	down	2001.13	1877.4	1591.23	2924.08	4549.91	4256.57	3961.74	10.8251	10.7398	10.552	11.993	12.1756	11.6204	12.2923	noncoding	AA587541	lincRNA-MEF2A	lincRNA	441	chr15	+	99976938	99977379	ATGAAGAGAGCCCTTCCCTCCCTGGCACTAGGCTGAGAGGGTTGGCTCTGGAAGTCAAAT	intergenic							3923.07	10.7056	12.0203
ASHG19A3L0003012	0.000181938	4.25935	down	29.0247	22.268	25.2543	140.576	113.022	138.163	142.359	5.02271	4.73958	4.88514	7.01391	7.0543	7.03777	6.78646	noncoding	BX110651	lincRNA-EGLN3-2	lincRNA	724	chr14	-	34528165	34528892	TTATAGGATCTTGACTGTATACACAGTTAAGCCATTTGTAGAGTTTTCCCTATTTGGGGG	intergenic							133.53	4.88248	6.97311
ASHG19A3A032464	1.64128e-05	4.41277	down	89.9462	83.1526	86.9979	416.523	418.465	419.073	419.757	6.60766	6.49474	6.60045	8.64967	8.7316	8.69869	8.75725	noncoding	ENST00000451066	AC009473.1	Ensembl	692	chr7	-	7989483	7990340	GCTCCCACTTAGAGACTGCAATGTAAGGTATGGAAACAGAATATTCTCTATAGAAACATA	intergenic							418.455	6.56761	8.7093
ASHG19A3A021837	1.40833e-06	10.3773	down	29.085	31.7744	28.8174	350.301	360.006	366.213	361.652	5.02576	5.20423	5.07096	8.4195	8.52029	8.43633	8.52661	noncoding	uc003fbc.2	AK311218	UCSC_knowngene	2015	chr3	-	156799456	156840791	GCGACCATGGTAACCAAAGTATACAGCCTGGAGTGAATGTTAATAAACAGGAAAGAAATG	intergenic							359.543	5.10032	8.47568
ASHG19A3A039611	0.00127491	12.2074	down	12.0364	22.9148	31.8471	343.277	279.831	283.622	282.572	3.76781	4.77421	5.20841	8.05316	8.14877	8.40406	8.16665	noncoding	ENST00000391359	RP1-122K4.3	Ensembl	544	chrX	-	13998184	14006939	TCAGAAAAATCAGAAACTTTGGGGGACCTGAAACATCATCTCTCTGGACTTGTTGCAAAG	intergenic							297.325	4.58348	8.19316
ASHG19A3L0002752	4.05391e-05	3.0039	down	577.125	596.886	605.953	1695.57	1501.48	1666.58	1620.09	9.11408	9.15783	9.22846	10.7015	10.8045	10.8271	10.6815	noncoding	EC495588	lincRNA-RCN2	lincRNA	90	chr15	-	77271632	77272065	ATTCCGGGTAGTCTGCAGTCCCCAGATCTCGGACACATCTGTGGTGCTGTCCATGGACAA	intergenic							1620.93	9.16679	10.7536
ASHG19A3A025860	0.00572422	5.10962	down	497.627	520.575	620.455	1819.06	3610.32	1697.28	3732.35	8.92025	8.97702	9.264	11.9143	10.8286	10.921	11.964	noncoding	ENST00000506148	RP11-556I14.1	Ensembl	472	chr4	+	105828513	106038002	TAATGCCTCTCCCTGGATACTAAATTTACTGACCCTGCCTAGGACCGAGAAGATTGATGA	intergenic							2714.75	9.05376	11.407
ASHG19A3A018644	5.82176e-06	8.16969	down	55.897	56.0677	55.9396	522.145	498.723	506.381	476.362	5.94114	5.96138	5.98358	8.84103	9.03129	9.05653	9.04042	noncoding	ENST00000449602	AJ006998.2	Ensembl	1000	chr21	-	16742840	16774624	TTGCTATAAAGAGTAGGCAAATGGAAATCTTTCCCCAAAGGGCACACTGGGATTGTTAGG	intergenic							500.903	5.96203	8.99232
ASHG19A3L0002089	1.14982e-07	84.7919	down	5	5.41045	5	436.233	446.956	423.908	454.85	2.37766	2.37922	2.39437	8.7737	8.75056	8.76687	8.86727	noncoding	BC029586	lincRNA-UBE2V2-2	lincRNA	1671	chr8	-	49623350	49647793	GGCACAGGTCACATGAACTTTGAAAGTGTGATATAAGTGAAAAGTGATTATAGGTTGGTA	exon sense-overlapping	NM_001142857	EFCAB1	EF-hand calcium-binding domain-containing	-	49627473	49647870	440.487	2.38375	8.7896
ASHG19A3L0002089	1.14982e-07	84.7919	down	5	5.41045	5	436.233	446.956	423.908	454.85	2.37766	2.37922	2.39437	8.7737	8.75056	8.76687	8.86727	noncoding	BC029586	lincRNA-UBE2V2-2	lincRNA	1671	chr8	-	49623350	49647793	GGCACAGGTCACATGAACTTTGAAAGTGTGATATAAGTGAAAAGTGATTATAGGTTGGTA	exon sense-overlapping	NM_024593	EFCAB1	EF-hand calcium-binding domain-containing	-	49635952	49647870	440.487	2.38375	8.7896
ASHG19A3L0000922	0.0456718	2.45376	down	269.43	367.363	368.962	640.926	1016.63	500.851	1210.78	8.091	8.5175	8.57119	10.2685	9.01442	9.36148	10.1085	noncoding	AA594021	lincRNA-GNA13	lincRNA	359	chr17	-	63099542	63099901	CTCCCTCTGACCCCATGAAAAGCTGTCATTTCCTAGGTAACTGGAGTTGCAGACAGCACA	intergenic							842.296	8.39323	9.68823
ASHG19A3A023002	5.79566e-05	15.5556	down	22.6577	16.9851	14.5471	292.101	332.949	355.518	353.088	4.66958	4.40495	4.12223	8.38373	8.47889	8.15215	8.41836	noncoding	ENST00000496067	RP11-180K7.1	Ensembl	2632	chr3	+	112521423	112541911	ACAAAAAGAGAGAGTTTCACATAAAGAATGATCAGTAAGGACAACGCTGGAGATCCTGAG	natural antisense	NM_001008784	CD200R1L	cell surface glycoprotein CD200 receptor 2	-	112534555	112564797	333.414	4.39892	8.35828
ASHG19A3A023002	5.79566e-05	15.5556	down	22.6577	16.9851	14.5471	292.101	332.949	355.518	353.088	4.66958	4.40495	4.12223	8.38373	8.47889	8.15215	8.41836	noncoding	ENST00000496067	RP11-180K7.1	Ensembl	2632	chr3	+	112521423	112541911	ACAAAAAGAGAGAGTTTCACATAAAGAATGATCAGTAAGGACAACGCTGGAGATCCTGAG	natural antisense	NM_001199215	CD200R1L	cell surface glycoprotein CD200 receptor 2	-	112534555	112564797	333.414	4.39892	8.35828
ASHG19A3L0001363	2.99562e-06	4.62082	down	238.717	236.561	230.586	1072.06	978.514	1052.3	1144.22	7.93602	7.91772	7.91448	10.1871	10.1336	10.1484	10.0545	noncoding	BQ187752	lincRNA-ATP13A3	lincRNA	642	chr3	-	194197527	194198173	TGTTGTGCGTTTGTAGACTTCAAACTTTGCTAGTGAGAGGCTGCTTATATTATTATCTAG	intergenic							1061.78	7.92274	10.1309
ASHG19A3A010250	0.0116707	3.05985	down	330.813	312.964	327.921	552.403	1140.17	1141.91	1170.39	8.3809	8.29272	8.40573	10.2179	10.2578	9.14197	10.2753	noncoding	uc010dmv.2	DM004440	UCSC_knowngene	109	chr18	-	33484780	33484889	CCCGGGCGCTGCTCTGACCCCTCGTGTCTTGTGTTGCAGCCGGAGGGACGCAGGTCCGCA	intergenic							1001.22	8.35978	9.97324
ASHG19A3L0002739	0.0259201	2.00497	down	8.96909	14.5203	11.4473	45.2225	19.7602	38.6544	27.3983	3.37199	4.21133	3.80217	4.51585	5.16024	5.34369	4.1752	noncoding	CV311274	lincRNA-BLID-3	lincRNA	153	chr11	+	121701145	121701295	AGTTAGGGTAGTCAGCAATTTAACAACGTCCTTGGTTTTGAAGAAAGTCTCCAGCCTTGG	intergenic							32.7589	3.79516	4.79874
ASHG19A3A038774	0.0014432	2.57736	down	38.8378	26.5119	26.1053	92.4687	91.2506	98.3683	100.383	5.42863	4.96561	4.93561	6.47224	6.54678	6.42212	6.46224	noncoding	uc004aiu.1	AK095210	UCSC_knowngene	2078	chr9	+	74920351	74958126	CAGGGGAAGTGTGACTGTAGCTTTAAATAGTTTAAATAGTCCTTCAAATACGGCAAATAA	intergenic							95.6177	5.10995	6.47584
ASHG19A3A040686	0.0237395	2.23592	down	17.2074	20.4688	25.7769	57.1589	57.7728	47.96	78.362	4.26497	4.63855	4.91547	6.10929	5.4822	5.68911	5.7882	noncoding	AL079309		misc_RNA	956	chrX	+	13111778	13112691	TGCTTATTAATAGTAATCCCATACTTGCTGTAAGCCCTGCAACAACTATCATTATCCATG	intergenic							60.3134	4.60633	5.7672
ASHG19A3L0000418	0.0157144	2.34373	down	813.961	727.373	839.003	2130	1925.37	911.978	2060.65	9.57501	9.43284	9.68064	11.0534	9.91175	11.1584	11.043	noncoding	BE080482	lincRNA-CTSC	lincRNA	506	chr11	-	88123120	88123615	ATTAGTAGTTTTAGACATACTTCATTAACCTGCCCTCTGCCTCCAATGTGGATACACTCC	intergenic							1757	9.56283	10.7916
ASHG19A3L0000504	4.88731e-05	4.05951	down	32.3776	26.315	31.003	139.948	148.186	141.049	159.166	5.17474	4.95548	5.1721	7.17715	7.08631	7.02913	7.19574	noncoding	AK299029	lincRNA-RAPGEF3	lincRNA	2776	chr12	-	48131323	48164823	AACCACACACTAGTGGAGAATCTCATCAACTTTGAGAAGATGAGAATGATGGCCAGAGCC	exon sense-overlapping	NM_001098531	RAPGEF3	rap guanine nucleotide exchange factor 3 isoform	-	48128452	48152889	147.087	5.10077	7.12208
ASHG19A3L0000504	4.88731e-05	4.05951	down	32.3776	26.315	31.003	139.948	148.186	141.049	159.166	5.17474	4.95548	5.1721	7.17715	7.08631	7.02913	7.19574	noncoding	AK299029	lincRNA-RAPGEF3	lincRNA	2776	chr12	-	48131323	48164823	AACCACACACTAGTGGAGAATCTCATCAACTTTGAGAAGATGAGAATGATGGCCAGAGCC	exon sense-overlapping	NM_006105	RAPGEF3	rap guanine nucleotide exchange factor 3 isoform	-	48128452	48152244	147.087	5.10077	7.12208
ASHG19A3L0000504	4.88731e-05	4.05951	down	32.3776	26.315	31.003	139.948	148.186	141.049	159.166	5.17474	4.95548	5.1721	7.17715	7.08631	7.02913	7.19574	noncoding	AK299029	lincRNA-RAPGEF3	lincRNA	2776	chr12	-	48131323	48164823	AACCACACACTAGTGGAGAATCTCATCAACTTTGAGAAGATGAGAATGATGGCCAGAGCC	exon sense-overlapping	NM_001098532	RAPGEF3	rap guanine nucleotide exchange factor 3 isoform	-	48128452	48152181	147.087	5.10077	7.12208
ASHG19A3A028484	0.0477038	2.14315	down	10.1305	5.0363	12.3191	20.992	26.2341	17.3632	31.1403	3.54591	2.32342	3.89825	4.7157	3.93721	4.17552	4.59394	noncoding	ENST00000503349	RP11-72L22.1	Ensembl	602	chr5	+	86263137	86433529	TTTCTGAGGTGTAGGTAAGAAAGATTGAGATTCCATCCGCACGAGACAAACCCAGCAGTT	intergenic							23.9324	3.25586	4.35559
ASHG19A3L0002712	0.00421514	2.01027	down	23.8834	20.3969	21.7563	46.577	52.3827	65.7642	63.7435	4.74807	4.63303	4.67975	5.80049	5.9565	5.38591	5.63448	noncoding	BM909110	lincRNA-KLHDC4	lincRNA	1172	chr16	-	87813676	87840082	TGCTATGTCTGCACCAAAGTCCCTGCTTAAAACTTTGGAACAAGAATGTAGCTTCAACGG	intergenic							57.1168	4.68695	5.69434
ASHG19A3A033810	0.000220259	2.75954	down	84.4877	79.5236	74.0525	256.335	246.728	236.836	243.789	6.52331	6.43479	6.37269	7.82974	7.87305	7.95688	7.97243	noncoding	ENST00000447933	AC073871.2	Ensembl	766	chr7	-	156264939	156398458	TTAAAATCCTCAAGAATAAGGAACATAGGCATGTGTCGTAACGGTCTCCACAGTGGGGGA	intergenic							245.922	6.4436	7.90802
ASHG19A3A009621	8.87698e-05	3.10576	down	765.911	782.33	744.783	2241.42	1981.96	2273.85	2005.46	9.49312	9.52573	9.50989	11.004	11.2612	11.2339	11.079	noncoding	uc002ike.2	LOC644246	UCSC_knowngene	513	chr17	+	44270938	44274080	AATGATGGAGGAAAAAACAGTCCCTCTTCCTCAGACAGTGACACCTCAAACTGCTACAGT	bidirectional	NM_001193466	KIAA1267	hypothetical protein LOC284058 isoform 1	-	44107281	44270166	2125.67	9.50958	11.1445
ASHG19A3A009621	8.87698e-05	3.10576	down	765.911	782.33	744.783	2241.42	1981.96	2273.85	2005.46	9.49312	9.52573	9.50989	11.004	11.2612	11.2339	11.079	noncoding	uc002ike.2	LOC644246	UCSC_knowngene	513	chr17	+	44270938	44274080	AATGATGGAGGAAAAAACAGTCCCTCTTCCTCAGACAGTGACACCTCAAACTGCTACAGT	intronic antisense	NM_001193465	KIAA1267	hypothetical protein LOC284058 isoform 2	-	44107281	44302740	2125.67	9.50958	11.1445
ASHG19A3A009621	8.87698e-05	3.10576	down	765.911	782.33	744.783	2241.42	1981.96	2273.85	2005.46	9.49312	9.52573	9.50989	11.004	11.2612	11.2339	11.079	noncoding	uc002ike.2	LOC644246	UCSC_knowngene	513	chr17	+	44270938	44274080	AATGATGGAGGAAAAAACAGTCCCTCTTCCTCAGACAGTGACACCTCAAACTGCTACAGT	bidirectional	NM_015443	KIAA1267	hypothetical protein LOC284058 isoform 1	-	44107281	44270272	2125.67	9.50958	11.1445
ASHG19A3A021366	0.00137463	3.33042	down	16.9654	11.8992	13.0642	63.0458	67.6257	42.7724	74.4567	4.24562	3.97743	3.97611	6.03247	5.31158	5.84106	6.02325	noncoding	ENST00000485242	MT-ND3	Ensembl	339	chr3	-	106615329	106615668	CCCACCATGAGCTTTTCAGACAACTGACCTAAAATTAATAATTAGTACAGCTCTCATATT	intergenic							61.9751	4.06639	5.80209
ASHG19A3L0001098	0.00572313	4.88412	down	8.62426	5.6487	9.74802	55.851	43.3514	63.2238	41.8957	3.31423	2.7894	3.5865	5.17087	5.89627	5.65477	5.35066	noncoding	BX101114	lincRNA-ERMN	lincRNA	796	chr2	-	158215198	158215993	CCTAATCTCTAGCAGAGAGAAATAGTGTTGGCTGGTTCTCAAAAATTTTATTATGGAACT	intergenic							51.0805	3.23005	5.51815
ASHG19A3A009936	0.0454646	2.42149	down	345.55	205.64	330.132	1078.41	494.342	790.561	527.358	8.44004	7.73203	8.41525	9.00432	9.70023	10.1574	9.02476	noncoding	uc010wse.1	KIAA1783	UCSC_knowngene	9651	chr17	+	73584138	73622925	GCTTGTTCTGAACCCCCACCGGTCCTTGCCTCTTTTTTCACCTGAGGTCCAGGCAAGCTA	intergenic							722.668	8.19577	9.47167
ASHG19A3L0001532	1.46772e-05	70.3504	down	136.58	92.9895	88.2472	6996.98	7173.02	7056.68	7941.95	7.1808	6.65646	6.61863	13.0234	12.918	12.9031	12.9759	noncoding	AK124936	lincRNA-FAM47E	lincRNA	1624	chr4	+	77135192	77204933	CTTTATCACCCATGAGATCAATATTCACATGTAATCTTCTCATATTTTTGTGGCACGTGA	bidirectional	NM_001204255	SCARB2	lysosome membrane protein 2 isoform 2	-	77079891	77135052	7292.16	6.81863	12.9551
ASHG19A3L0001532	1.46772e-05	70.3504	down	136.58	92.9895	88.2472	6996.98	7173.02	7056.68	7941.95	7.1808	6.65646	6.61863	13.0234	12.918	12.9031	12.9759	noncoding	AK124936	lincRNA-FAM47E	lincRNA	1624	chr4	+	77135192	77204933	CTTTATCACCCATGAGATCAATATTCACATGTAATCTTCTCATATTTTTGTGGCACGTGA	exon sense-overlapping	NM_001136570	FAM47E	hypothetical protein LOC100129583 isoform a	+	77172852	77204929	7292.16	6.81863	12.9551
ASHG19A3L0001532	1.46772e-05	70.3504	down	136.58	92.9895	88.2472	6996.98	7173.02	7056.68	7941.95	7.1808	6.65646	6.61863	13.0234	12.918	12.9031	12.9759	noncoding	AK124936	lincRNA-FAM47E	lincRNA	1624	chr4	+	77135192	77204933	CTTTATCACCCATGAGATCAATATTCACATGTAATCTTCTCATATTTTTGTGGCACGTGA	bidirectional	NM_005506	SCARB2	lysosome membrane protein 2 isoform 1	-	77079891	77135052	7292.16	6.81863	12.9551
ASHG19A3A030823	0.000179924	31.3018	down	6.13043	5.08404	6.82645	218.464	215.17	229.459	231.607	2.91297	2.32536	3.13139	7.74644	7.82241	7.70588	7.75759	noncoding	ENST00000454185	RP11-568A7.3	Ensembl	579	chr6	-	167650995	167653968	TCCACCTAATGACAGACATACTTGAGTCCCACAGTCATAAGGAGGATGAAGTCTCTCTCT	intergenic							223.675	2.78991	7.75808
ASHG19A3A041074	7.87915e-05	2.71132	down	3645.97	3434.74	3411.64	8284.26	7021.7	7798.38	8502.39	11.6636	11.589	11.6399	13.1288	13.0546	13.1567	12.9392	noncoding	NR_015367	LOC550643	RefSeq_NR	722	chrX	+	56755717	56844002	TATTTACAATGCTACCCTGCTTTTTCTGGTGTCCTGAACCTGGAAGTTGTGCTTTTTAAG	intergenic							7901.68	11.6308	13.0698
ASHG19A3A039645	0.0226116	2.53664	down	5.91176	17.4744	9.13385	53.8801	24.0484	39.0871	27.7707	2.87414	4.43942	3.49621	4.53591	5.17603	5.6075	4.46525	noncoding	ENST00000445666	RP3-389A20.2	Ensembl	394	chrX	-	17787124	17787518	CACCTCATCCAGACCATGAGCAAGGCAAGGAAGGTGTCTCTCTTATCCACTGGGAAATAA	intergenic							36.1966	3.60326	4.94617
ASHG19A3L0000933	0.00740199	2.60765	down	59.8253	38.9908	51.8273	109.204	163.148	158.07	190.02	6.03247	5.47696	5.87745	7.44434	7.26512	6.66243	7.34161	noncoding	exon1960-	lincRNA-CTAGE1-2	lincRNA	231	chr18	-	20047237	20047467	GCTCTTCTTCATGACTCCTCGCCAATGCACAGATGTAAACTATTGTCTGATTATTAAAAG								155.111	5.79563	7.17837
ASHG19A3A030645	0.00818517	3.36247	down	14.8106	16.7562	12.105	35.9637	65.1801	66.1697	101.926	4.06138	4.38751	3.87284	6.4978	5.96588	4.99661	5.96677	noncoding	NR_027113	LOC285740	RefSeq_NR	1514	chr6	-	143875466	143890476	ATGTGCCTGTTGATCTACTATTCCGTGGAAATACTGGAATCACCAGCTCAATAATAAGAG	intergenic							67.3099	4.10724	5.85677
ASHG19A3A050299	0.00660181	5.09959	down	11.7806	6.88267	5	55.2799	48.9457	43.709	54.4978	3.74072	3.37471	2.39437	5.56521	5.34202	5.64187	5.53214	noncoding	ENST00000423629	RP11-512C24.2	Ensembl	727	chr13	+	74993309	75009296	CAACAGGAGAGAGGACAAAGAAAGGCAGCAAAAGACTATTTCCAATGCGAAATATGATCA	intergenic							50.6081	3.16993	5.52031
ASHG19A3L0001454	0.00469971	2.86969	down	275.186	266.763	168.712	689.424	670.974	580.189	719.491	8.11756	8.07829	7.49846	9.4797	9.23507	9.47052	9.4907	noncoding	DT216591	lincRNA-RAB28-4	lincRNA	636	chr4	+	12129003	12129639	ATAGTATCACTGTTAAACACATTGCCCACCTTTAGCCCTCAGTCCCATCCAAAGTTGTTA	intergenic							665.02	7.8981	9.419
ASHG19A3A021538	0.00515087	4.2269	down	5	7.43977	5.6682	55.2297	39.0439	31.1347	24.2414	2.37766	3.4591	2.92578	4.3328	4.83314	5.64032	5.19552	noncoding	uc003ejk.2	BX537548	UCSC_knowngene	3078	chr3	-	127199533	127255803	AGGCCAAGCCACTGGTGAATATGCTGCAAAAAATATGCTGGAACTTCTATGAATACCACA	intergenic							37.4124	2.92085	5.00044
ASHG19A3A012252	0.000106636	5.71562	down	88.7928	77.5947	82.0863	518.531	549.721	397.597	596.051	6.5897	6.40213	6.51764	9.19233	8.65129	9.04678	9.18187	noncoding	uc002msx.1	AX747405	UCSC_knowngene	1801	chr19	+	12098431	12138553	TCCTGGACTGCTCACGGGAGTTCTGCAGGAGACGCCGGAATATCTGGAAGCTGAAAAATG	intronic antisense	NM_001080411	ZNF433	zinc finger protein 433	-	12125531	12146525	515.475	6.50316	9.01807
ASHG19A3A049511	5.56942e-07	32.7811	down	585.151	542.614	606.886	17120.8	16326.6	16030.7	16548	9.13212	9.02932	9.23149	14.0992	14.1293	14.2386	14.1959	noncoding	uc001uzl.2	BC025370	UCSC_knowngene	976	chr13	-	44974387	44980021	AGGTGTGCGGCATTGCCTCTGGGTCCCTGCTTTGGTTTAATTAAACTAAGTCTGGTGGTG	intergenic							16506.5	9.13098	14.1658
ASHG19A3L0001176	1.4454e-06	3.11253	down	951.379	927.999	891.786	2463.13	2516.04	2496.16	2680.1	9.79518	9.75851	9.76002	11.4323	11.4001	11.3677	11.4372	noncoding	BM704421	lincRNA-NDUFA10	lincRNA	436	chr2	+	240323441	240324049	CCTGTGATTCTTGGTGGGGGAAACTAGTTATGTGGATAAAAATACAGTTAGCAAAATAAA	bidirectional	NM_006037	HDAC4	histone deacetylase 4	-	239969863	240322643	2538.86	9.77124	11.4093
ASHG19A3A043533	0.00382504	3.97796	down	5	5.12196	6.24612	26.6967	24.4912	28.7317	27.6359	2.37766	2.32689	3.02983	4.52667	4.71313	4.54888	4.49194	noncoding	ENST00000450152	RP11-464C19.3	Ensembl	403	chr10	+	3974895	3978004	GCCTGAACATCATCTATTTAGTTAGCTTGTGTTGTTTAGATGTGCTTCAGATCTCAAAAA	intergenic							26.8889	2.57813	4.57016
ASHG19A3A027376	0.01561	2.05057	down	63.0572	48.9557	51.3501	114.002	122.504	175.363	121.128	6.1073	5.77874	5.86581	6.76774	7.41554	6.7225	6.90746	noncoding	ENST00000417795	AC034220.3	Ensembl	1792	chr5	-	131646977	131705608	GGGCACCCGCCGCCGACCAGGCAAGCCAGGCAGCAGGCGACCCAAGACCGTCCGCGGAGG	natural antisense	NM_003059	SLC22A4	solute carrier family 22 member 4	+	131630144	131679899	133.249	5.91728	6.95331
ASHG19A3A027376	0.01561	2.05057	down	63.0572	48.9557	51.3501	114.002	122.504	175.363	121.128	6.1073	5.77874	5.86581	6.76774	7.41554	6.7225	6.90746	noncoding	ENST00000417795	AC034220.3	Ensembl	1792	chr5	-	131646977	131705608	GGGCACCCGCCGCCGACCAGGCAAGCCAGGCAGCAGGCGACCCAAGACCGTCCGCGGAGG	natural antisense	NM_003060	SLC22A5	solute carrier family 22 member 5	+	131705400	131731306	133.249	5.91728	6.95331
ASHG19A3A023020	5.23488e-07	41.4909	down	62.243	54.1177	55.9705	2620.83	2342.46	2233.32	2722.31	6.08787	5.91024	5.9853	11.4513	11.2348	11.4593	11.3313	noncoding	uc003ebe.1	AX747798	UCSC_knowngene	3023	chr3	+	113933237	113955051	TAGAGTTTATCTCTGGAAGGAATTCTTCAATGCCAAGTGAGGATGAGCTGCAGGTCACAG	natural antisense	NM_007136	ZNF80	zinc finger protein 80	-	113953479	113956425	2479.73	5.99447	11.3692
ASHG19A3A029357	0.000260265	3.06868	down	96.911	87.4109	80.1062	313.059	287.766	299.605	295.718	6.71609	6.56482	6.48487	8.12545	8.23653	8.25954	8.20334	noncoding	ENST00000512710	AL359643.3	Ensembl	3273	chr6	-	5031989	5054657	AATAACAGGAAACAAGAAGAACTGCTGGCCTTATTCATAGTTAATAAAGAGAACCAGATG	intergenic							299.037	6.58859	8.20621
ASHG19A3L0002611	0.00016719	3.06092	down	1178.19	1140.51	968.723	3050.7	2790.9	2793.7	3011.63	10.077	10.0394	9.8721	11.6121	11.5613	11.6787	11.5884	noncoding	BC043232	lincRNA-ZSCAN5A	lincRNA	2472	chr19	-	56732680	56879752	TTTGAGTAAATATGTGTCCTCCCCACTGAGCTTTGTTTTCTGTTTCATTATGTCCATTGT	exon sense-overlapping	NM_024303	ZSCAN5A	zinc finger and SCAN domain-containing protein	-	56732678	56739659	2911.73	9.99617	11.6101
ASHG19A3A000150	0.000851636	5.3166	down	21.7238	20.1805	21.7672	101.401	150.688	153.506	160.534	4.60455	4.61756	4.68022	7.18901	7.21732	6.55318	7.21896	noncoding	ENST00000421322	XIST	Ensembl	446	chrX	-	73040487	73046641	TGGATAGAGGACCCAAGCGAAAAAGTTTCTGGCATCACTACCACTACTGATTAAACAAGA	intergenic							141.532	4.63411	7.04461
ASHG19A3L0002840	9.34422e-06	5.82011	down	224.582	221.628	217.294	1280.07	1168.24	1323.51	1248.62	7.85243	7.83137	7.83799	10.3262	10.4732	10.4143	10.3128	noncoding	AA234012	lincRNA-AIFM1	lincRNA	486	chrX	+	129251231	129318597	AGATGACATCTTTCACCAACCTCAAAATGTGGATCCAAGAATGCAATGGGCATGCTGTGC	intronic antisense	NM_145813	AIFM1	apoptosis-inducing factor 1, mitochondrial	-	129263337	129299861	1255.11	7.8406	10.3816
ASHG19A3L0002840	9.34422e-06	5.82011	down	224.582	221.628	217.294	1280.07	1168.24	1323.51	1248.62	7.85243	7.83137	7.83799	10.3262	10.4732	10.4143	10.3128	noncoding	AA234012	lincRNA-AIFM1	lincRNA	486	chrX	+	129251231	129318597	AGATGACATCTTTCACCAACCTCAAAATGTGGATCCAAGAATGCAATGGGCATGCTGTGC	intronic antisense	NM_145812	AIFM1	apoptosis-inducing factor 1, mitochondrial	-	129263337	129299861	1255.11	7.8406	10.3816
ASHG19A3L0002840	9.34422e-06	5.82011	down	224.582	221.628	217.294	1280.07	1168.24	1323.51	1248.62	7.85243	7.83137	7.83799	10.3262	10.4732	10.4143	10.3128	noncoding	AA234012	lincRNA-AIFM1	lincRNA	486	chrX	+	129251231	129318597	AGATGACATCTTTCACCAACCTCAAAATGTGGATCCAAGAATGCAATGGGCATGCTGTGC	intronic antisense	NM_004208	AIFM1	apoptosis-inducing factor 1, mitochondrial	-	129263337	129299861	1255.11	7.8406	10.3816
ASHG19A3L0002840	9.34422e-06	5.82011	down	224.582	221.628	217.294	1280.07	1168.24	1323.51	1248.62	7.85243	7.83137	7.83799	10.3262	10.4732	10.4143	10.3128	noncoding	AA234012	lincRNA-AIFM1	lincRNA	486	chrX	+	129251231	129318597	AGATGACATCTTTCACCAACCTCAAAATGTGGATCCAAGAATGCAATGGGCATGCTGTGC	exon sense-overlapping	NM_004794	RAB33A	ras-related protein Rab-33A	+	129305772	129318844	1255.11	7.8406	10.3816
ASHG19A3L0002840	9.34422e-06	5.82011	down	224.582	221.628	217.294	1280.07	1168.24	1323.51	1248.62	7.85243	7.83137	7.83799	10.3262	10.4732	10.4143	10.3128	noncoding	AA234012	lincRNA-AIFM1	lincRNA	486	chrX	+	129251231	129318597	AGATGACATCTTTCACCAACCTCAAAATGTGGATCCAAGAATGCAATGGGCATGCTGTGC	intronic antisense	NM_001130846	AIFM1	apoptosis-inducing factor 1, mitochondrial	-	129263337	129272015	1255.11	7.8406	10.3816
ASHG19A3L0002840	9.34422e-06	5.82011	down	224.582	221.628	217.294	1280.07	1168.24	1323.51	1248.62	7.85243	7.83137	7.83799	10.3262	10.4732	10.4143	10.3128	noncoding	AA234012	lincRNA-AIFM1	lincRNA	486	chrX	+	129251231	129318597	AGATGACATCTTTCACCAACCTCAAAATGTGGATCCAAGAATGCAATGGGCATGCTGTGC	intronic antisense	NM_001130847	AIFM1	apoptosis-inducing factor 1, mitochondrial	-	129263337	129299861	1255.11	7.8406	10.3816
ASHG19A3L0000904	0.0018713	3.75946	down	11.5856	19.5956	13.9535	80.3994	49.5851	86.1211	73.6592	3.71676	4.58092	4.06697	6.01539	6.34743	6.21317	5.5523	noncoding	BE551986	lincRNA-PIRT	lincRNA	455	chr17	+	10671491	10672306	GAGAGACCCCTTAGTACTGATTGCTTATGTGGGGCTCTGGCACTCCGCAGTGATCACCTA	intergenic							72.4412	4.12155	6.03207
ASHG19A3L0000471	0.0103243	2.57919	down	12.7394	8.75463	5.21468	31.9307	29.6862	26.5368	38.12	3.85304	3.62804	2.83635	5.02505	4.5931	4.82121	4.78488	noncoding	BG399904	lincRNA-PTHLH-1	lincRNA	473	chr12	-	28173729	28174202	GAGAACCCCAATATGCAAATAAGCAGTCATAGTTATTCCCAAAATACCTATTATATTCCC	intergenic							31.5684	3.43914	4.80606
ASHG19A3L0001044	4.13512e-06	8.88852	down	54.1982	54.3353	50.2565	502.269	514.506	528.06	516.005	5.89905	5.91524	5.83499	8.96565	9.08626	8.99583	9.09241	noncoding	AK057313	lincRNA-PTPN4	lincRNA	2048	chr2	+	120436774	120481191	TTGTCACTTGGGTGCCAGGATCTGCTGATCAATTAGCCAAACATCCAACGTGAGAAAAAG	exon sense-overlapping	NM_001105198	TMEM177	transmembrane protein 177	+	120436742	120439694	515.21	5.8831	9.03504
ASHG19A3L0001044	4.13512e-06	8.88852	down	54.1982	54.3353	50.2565	502.269	514.506	528.06	516.005	5.89905	5.91524	5.83499	8.96565	9.08626	8.99583	9.09241	noncoding	AK057313	lincRNA-PTPN4	lincRNA	2048	chr2	+	120436774	120481191	TTGTCACTTGGGTGCCAGGATCTGCTGATCAATTAGCCAAACATCCAACGTGAGAAAAAG	exon sense-overlapping	NM_030577	TMEM177	transmembrane protein 177	+	120436742	120439694	515.21	5.8831	9.03504
ASHG19A3L0001044	4.13512e-06	8.88852	down	54.1982	54.3353	50.2565	502.269	514.506	528.06	516.005	5.89905	5.91524	5.83499	8.96565	9.08626	8.99583	9.09241	noncoding	AK057313	lincRNA-PTPN4	lincRNA	2048	chr2	+	120436774	120481191	TTGTCACTTGGGTGCCAGGATCTGCTGATCAATTAGCCAAACATCCAACGTGAGAAAAAG	exon sense-overlapping	NM_001105199	TMEM177	transmembrane protein 177	+	120436742	120439694	515.21	5.8831	9.03504
ASHG19A3A050296	0.00224574	8.0788	down	5	5.02466	6.86834	48.8176	51.081	61.1447	56.3857	2.37766	2.32294	3.13923	5.61625	5.84235	5.45655	5.59452	noncoding	uc001vji.1	AK056689	UCSC_knowngene	1518	chr13	+	74805593	74832291	ATTACAGGAAACCTTGAAGTGGATATGGAAGCTTGGCAGCCAGCTTGGATCTTCCTAAGA	intergenic							54.3572	2.61328	5.62742
ASHG19A3A055233	0.0177991	3.43037	down	151.158	169.606	161.027	926.749	345.347	846.134	390.602	7.31476	7.46714	7.43337	8.53792	9.79518	9.93001	8.47072	noncoding	uc003tdd.2	RP9P	UCSC_knowngene	1403	chr7	-	32956427	32982782	CTACAGCTATTCAACTGAGGACAGAGTAGTTATGAAAAACCTCCTCCTGGGCTTATCAAG	intergenic							627.208	7.40509	9.18346
ASHG19A3A017145	0.00298015	2.33926	down	12.5067	16.0743	16.7389	56.7342	42.7388	59.3402	31.5585	3.82331	4.3325	4.32251	4.73861	5.79622	5.67939	5.32775	noncoding	ENST00000418025	AC097713.3	Ensembl	562	chr2	+	235346971	235370771	GACTGGTATGGCTCTTCCTACAAACCAGCTCATCGGCATTATAGTCTTGATCAGTTCTTG	intergenic							47.5929	4.15944	5.38549
ASHG19A3A046228	0.000181441	4.15189	down	90.8681	92.1819	96.906	369.398	440.866	430.479	451.017	6.621	6.64287	6.744	8.75976	8.77316	8.51404	8.84527	noncoding	NR_033314	BDNFOS	RefSeq_NR	1478	chr11	+	27528398	27699348	TATTGGGGGATACTGAGGTGAGCAGGGTATAAGTGGGGCAAGACTTTTCAGTGTAAACTT	natural antisense	NM_001143811	BDNF	brain-derived neurotrophic factor isoform a	-	27676441	27722600	422.94	6.66929	8.72306
ASHG19A3A046228	0.000181441	4.15189	down	90.8681	92.1819	96.906	369.398	440.866	430.479	451.017	6.621	6.64287	6.744	8.75976	8.77316	8.51404	8.84527	noncoding	NR_033314	BDNFOS	RefSeq_NR	1478	chr11	+	27528398	27699348	TATTGGGGGATACTGAGGTGAGCAGGGTATAAGTGGGGCAAGACTTTTCAGTGTAAACTT	natural antisense	NM_001143814	BDNF	brain-derived neurotrophic factor isoform a	-	27676441	27722035	422.94	6.66929	8.72306
ASHG19A3A046228	0.000181441	4.15189	down	90.8681	92.1819	96.906	369.398	440.866	430.479	451.017	6.621	6.64287	6.744	8.75976	8.77316	8.51404	8.84527	noncoding	NR_033314	BDNFOS	RefSeq_NR	1478	chr11	+	27528398	27699348	TATTGGGGGATACTGAGGTGAGCAGGGTATAAGTGGGGCAAGACTTTTCAGTGTAAACTT	natural antisense	NM_001143807	BDNF	brain-derived neurotrophic factor isoform a	-	27676441	27741294	422.94	6.66929	8.72306
ASHG19A3A046228	0.000181441	4.15189	down	90.8681	92.1819	96.906	369.398	440.866	430.479	451.017	6.621	6.64287	6.744	8.75976	8.77316	8.51404	8.84527	noncoding	NR_033314	BDNFOS	RefSeq_NR	1478	chr11	+	27528398	27699348	TATTGGGGGATACTGAGGTGAGCAGGGTATAAGTGGGGCAAGACTTTTCAGTGTAAACTT	natural antisense	NM_170735	BDNF	brain-derived neurotrophic factor isoform a	-	27676441	27681196	422.94	6.66929	8.72306
ASHG19A3A046228	0.000181441	4.15189	down	90.8681	92.1819	96.906	369.398	440.866	430.479	451.017	6.621	6.64287	6.744	8.75976	8.77316	8.51404	8.84527	noncoding	NR_033314	BDNFOS	RefSeq_NR	1478	chr11	+	27528398	27699348	TATTGGGGGATACTGAGGTGAGCAGGGTATAAGTGGGGCAAGACTTTTCAGTGTAAACTT	natural antisense	NM_170732	BDNF	brain-derived neurotrophic factor isoform a	-	27676441	27742326	422.94	6.66929	8.72306
ASHG19A3A046228	0.000181441	4.15189	down	90.8681	92.1819	96.906	369.398	440.866	430.479	451.017	6.621	6.64287	6.744	8.75976	8.77316	8.51404	8.84527	noncoding	NR_033314	BDNFOS	RefSeq_NR	1478	chr11	+	27528398	27699348	TATTGGGGGATACTGAGGTGAGCAGGGTATAAGTGGGGCAAGACTTTTCAGTGTAAACTT	natural antisense	NM_001143813	BDNF	brain-derived neurotrophic factor isoform a	-	27676441	27722035	422.94	6.66929	8.72306
ASHG19A3A046228	0.000181441	4.15189	down	90.8681	92.1819	96.906	369.398	440.866	430.479	451.017	6.621	6.64287	6.744	8.75976	8.77316	8.51404	8.84527	noncoding	NR_033314	BDNFOS	RefSeq_NR	1478	chr11	+	27528398	27699348	TATTGGGGGATACTGAGGTGAGCAGGGTATAAGTGGGGCAAGACTTTTCAGTGTAAACTT	natural antisense	NM_001143810	BDNF	brain-derived neurotrophic factor isoform e	-	27676441	27722600	422.94	6.66929	8.72306
ASHG19A3A046228	0.000181441	4.15189	down	90.8681	92.1819	96.906	369.398	440.866	430.479	451.017	6.621	6.64287	6.744	8.75976	8.77316	8.51404	8.84527	noncoding	NR_033314	BDNFOS	RefSeq_NR	1478	chr11	+	27528398	27699348	TATTGGGGGATACTGAGGTGAGCAGGGTATAAGTGGGGCAAGACTTTTCAGTGTAAACTT	natural antisense	NM_170733	BDNF	brain-derived neurotrophic factor isoform a	-	27676441	27723180	422.94	6.66929	8.72306
ASHG19A3A046228	0.000181441	4.15189	down	90.8681	92.1819	96.906	369.398	440.866	430.479	451.017	6.621	6.64287	6.744	8.75976	8.77316	8.51404	8.84527	noncoding	NR_033314	BDNFOS	RefSeq_NR	1478	chr11	+	27528398	27699348	TATTGGGGGATACTGAGGTGAGCAGGGTATAAGTGGGGCAAGACTTTTCAGTGTAAACTT	natural antisense	NM_001143816	BDNF	brain-derived neurotrophic factor isoform a	-	27676441	27681196	422.94	6.66929	8.72306
ASHG19A3A046228	0.000181441	4.15189	down	90.8681	92.1819	96.906	369.398	440.866	430.479	451.017	6.621	6.64287	6.744	8.75976	8.77316	8.51404	8.84527	noncoding	NR_033314	BDNFOS	RefSeq_NR	1478	chr11	+	27528398	27699348	TATTGGGGGATACTGAGGTGAGCAGGGTATAAGTGGGGCAAGACTTTTCAGTGTAAACTT	natural antisense	NM_001143806	BDNF	brain-derived neurotrophic factor isoform a	-	27676441	27742326	422.94	6.66929	8.72306
ASHG19A3A046228	0.000181441	4.15189	down	90.8681	92.1819	96.906	369.398	440.866	430.479	451.017	6.621	6.64287	6.744	8.75976	8.77316	8.51404	8.84527	noncoding	NR_033314	BDNFOS	RefSeq_NR	1478	chr11	+	27528398	27699348	TATTGGGGGATACTGAGGTGAGCAGGGTATAAGTGGGGCAAGACTTTTCAGTGTAAACTT	natural antisense	NM_170734	BDNF	brain-derived neurotrophic factor isoform c	-	27676441	27721214	422.94	6.66929	8.72306
ASHG19A3A046228	0.000181441	4.15189	down	90.8681	92.1819	96.906	369.398	440.866	430.479	451.017	6.621	6.64287	6.744	8.75976	8.77316	8.51404	8.84527	noncoding	NR_033314	BDNFOS	RefSeq_NR	1478	chr11	+	27528398	27699348	TATTGGGGGATACTGAGGTGAGCAGGGTATAAGTGGGGCAAGACTTTTCAGTGTAAACTT	natural antisense	NM_001143809	BDNF	brain-derived neurotrophic factor isoform d	-	27676441	27722600	422.94	6.66929	8.72306
ASHG19A3A046228	0.000181441	4.15189	down	90.8681	92.1819	96.906	369.398	440.866	430.479	451.017	6.621	6.64287	6.744	8.75976	8.77316	8.51404	8.84527	noncoding	NR_033314	BDNFOS	RefSeq_NR	1478	chr11	+	27528398	27699348	TATTGGGGGATACTGAGGTGAGCAGGGTATAAGTGGGGCAAGACTTTTCAGTGTAAACTT	natural antisense	NM_170731	BDNF	brain-derived neurotrophic factor isoform b	-	27676441	27743605	422.94	6.66929	8.72306
ASHG19A3A046228	0.000181441	4.15189	down	90.8681	92.1819	96.906	369.398	440.866	430.479	451.017	6.621	6.64287	6.744	8.75976	8.77316	8.51404	8.84527	noncoding	NR_033314	BDNFOS	RefSeq_NR	1478	chr11	+	27528398	27699348	TATTGGGGGATACTGAGGTGAGCAGGGTATAAGTGGGGCAAGACTTTTCAGTGTAAACTT	natural antisense	NM_001709	BDNF	brain-derived neurotrophic factor isoform a	-	27676441	27722035	422.94	6.66929	8.72306
ASHG19A3A046228	0.000181441	4.15189	down	90.8681	92.1819	96.906	369.398	440.866	430.479	451.017	6.621	6.64287	6.744	8.75976	8.77316	8.51404	8.84527	noncoding	NR_033314	BDNFOS	RefSeq_NR	1478	chr11	+	27528398	27699348	TATTGGGGGATACTGAGGTGAGCAGGGTATAAGTGGGGCAAGACTTTTCAGTGTAAACTT	bidirectional	NM_018362	LIN7C	protein lin-7 homolog C	-	27515964	27528326	422.94	6.66929	8.72306
ASHG19A3A046228	0.000181441	4.15189	down	90.8681	92.1819	96.906	369.398	440.866	430.479	451.017	6.621	6.64287	6.744	8.75976	8.77316	8.51404	8.84527	noncoding	NR_033314	BDNFOS	RefSeq_NR	1478	chr11	+	27528398	27699348	TATTGGGGGATACTGAGGTGAGCAGGGTATAAGTGGGGCAAGACTTTTCAGTGTAAACTT	natural antisense	NM_001143808	BDNF	brain-derived neurotrophic factor isoform a	-	27676441	27722600	422.94	6.66929	8.72306
ASHG19A3A046228	0.000181441	4.15189	down	90.8681	92.1819	96.906	369.398	440.866	430.479	451.017	6.621	6.64287	6.744	8.75976	8.77316	8.51404	8.84527	noncoding	NR_033314	BDNFOS	RefSeq_NR	1478	chr11	+	27528398	27699348	TATTGGGGGATACTGAGGTGAGCAGGGTATAAGTGGGGCAAGACTTTTCAGTGTAAACTT	natural antisense	NM_001143812	BDNF	brain-derived neurotrophic factor isoform a	-	27676441	27722447	422.94	6.66929	8.72306
ASHG19A3A046228	0.000181441	4.15189	down	90.8681	92.1819	96.906	369.398	440.866	430.479	451.017	6.621	6.64287	6.744	8.75976	8.77316	8.51404	8.84527	noncoding	NR_033314	BDNFOS	RefSeq_NR	1478	chr11	+	27528398	27699348	TATTGGGGGATACTGAGGTGAGCAGGGTATAAGTGGGGCAAGACTTTTCAGTGTAAACTT	natural antisense	NM_001143805	BDNF	brain-derived neurotrophic factor isoform a	-	27676441	27742326	422.94	6.66929	8.72306
ASHG19A3L0001476	0.000355108	2.50658	down	305.629	301.414	310.992	823.724	663.198	686.1	841.406	8.26962	8.23801	8.33164	9.71314	9.48574	9.74963	9.47339	noncoding	BU621051	lincRNA-PPARGC1A-2	lincRNA	726	chr4	-	24337862	24338571	TTTTAGGAGAAAATATCCCAGCTCGAGATGTACCTTCACCATCCCTGTCTCTTCTCAGCA	intergenic							753.607	8.27976	9.60548
ASHG19A3A049382	0.000393743	2.60099	down	76.6049	81.2371	99.3532	265.172	242.385	250.051	236.761	6.39152	6.46424	6.77658	7.78233	7.95897	8.00838	7.94302	noncoding	uc001usr.2	CR592782	UCSC_knowngene	2567	chr13	-	30677365	30683005	TTGGAATGCATCCTCCACTTTAGCAAAAGAATTATGTGTTTTGTTTGCTCTTCATCATGT	intergenic							248.592	6.54412	7.92318
ASHG19A3A014455	0.00266932	2.37466	down	5.71315	5.54054	5	19.5603	15.1894	14.9337	18.7873	2.83694	2.6177	2.39437	3.9263	3.6972	4.06873	3.764	noncoding	ENST00000420880	AC023128.2	Ensembl	1223	chr2	-	145512342	145513565	AATTTGTGACATCCAATTCAGGTTCCTCAACAACAAAGTACAAGTAAATGTCATCCCTGA	intergenic							17.1177	2.61633	3.86406
ASHG19A3L0000831	3.22796e-06	5.76369	down	1494.49	1394.48	1386.98	6966.97	6713.78	7036.31	7153.57	10.4081	10.312	10.3661	12.8732	12.914	12.8961	12.8729	noncoding	BU690073	lincRNA-CCDC33	lincRNA	416	chr15	+	74513616	74513896	TCCTGGAGACTCGGGAACTAAAACAATCAATTCCCCTGAGCAATAAAATTATGGACAGTG	intergenic							6967.66	10.3621	12.889
ASHG19A3L0003444	0.0112251	2.2283	down	16.3242	7.45094	10.8527	22.435	36.7073	30.3906	56.6064	4.19235	3.46112	3.72861	5.62374	4.79875	4.27609	5.1013	noncoding	chr10:95567958-95575624-	lincRNA-LGI1	lincRNA	7667	chr10	-	95567958	95575624	AACTCATCTACTATAAAGAAGGTGGTATTGGGTCAAGGTCTCCAAACTTTCAAGCTGTTT	intergenic							36.5348	3.79403	4.94997
ASHG19A3A051125	0.000734624	4.92291	down	15.6331	14.155	10.8228	90.8823	85.5051	80.9831	84.6692	4.13253	4.17867	3.72579	6.22528	6.25605	6.3987	6.36735	noncoding	NR_015430	C14orf64	RefSeq_NR	1496	chr14	-	98391946	98444461	AGAAAATCACAGTAATAGGGGAAAATAAGGGCTGAGAAAAAAGTCCATGCACTGCAGCGG	intergenic							85.5099	4.01233	6.31184
ASHG19A3A029517	0.00219602	2.26196	down	35.1831	49.1724	39.7767	106.635	108.603	109.113	122.608	5.2957	5.78457	5.51426	6.78487	6.69937	6.62773	6.72439	noncoding	ENST00000455966	RP1-224A6.3	Ensembl	615	chr1	-	22350486	22351461	GATGCCGCTTGAGTCCCAGAGCAACTCCAATTTCATAGGCACATAAATTTATGTGAAAGT	intergenic							111.74	5.53151	6.70909
ASHG19A3A028539	0.0229709	3.36627	down	186.568	190.003	170.079	275.015	748.16	776.922	973.889	7.60797	7.62126	7.5109	9.94544	9.67252	8.06225	9.64458	noncoding	uc003klp.2	FIS	UCSC_knowngene	2049	chr5	+	95187935	95195834	GGATTCTAAAAACTGACAACAAACCACTTACCCCTATTGCTCTTCTTCCTAAAGCTAAAG	intergenic							693.496	7.58005	9.3312
ASHG19A3A034136	0.00642841	2.11137	down	193.887	189.872	206.823	412.488	343.743	462.574	531.839	7.66042	7.62016	7.77254	9.01729	8.88494	8.68224	8.46574	noncoding	ENST00000414621	AC006027.2	Ensembl	230	chr7	+	30430523	30451991	AAACACTTGTCTGCTGTTTCTGTGGCCTGGCTGAGCCAAGAAAACATGTTAAAGCACAGA	intergenic							437.661	7.68437	8.76255
ASHG19A3L0000869	4.24557e-06	2.33643	down	403.401	333.417	372.854	872.925	812.589	741.141	910.683	8.64638	8.38246	8.58713	9.84225	9.60618	9.83577	9.76767	noncoding	DN604327	lincRNA-CDH11-1	lincRNA	160	chr16	-	65261807	65261927	TTCCCCAGCCTGGACAACACACTTCAAGAGTAAAACTTTGCTGTAAATAAATGAATCAAC	intergenic							834.334	8.53866	9.76297
ASHG19A3A011300	2.99335e-05	4.13022	down	165.027	178.808	163.968	702.454	648.177	708.747	797.28	7.43944	7.54099	7.4579	9.63185	9.54053	9.49907	9.43119	noncoding	BC045720		RNAdb	1844	chr19	-	28281401	28284607	GTGGACATCTGTCTGGAGGAGCAATTTTACTGCGACATTTTAAAGAAACAAATTTAATTG	intergenic							714.164	7.47944	9.52566
ASHG19A3A019071	5.56163e-06	3.84901	down	145.7	129.055	140.531	551.593	557.935	532.695	583.443	7.26332	7.10114	7.25301	9.1598	9.1007	9.13831	9.20244	noncoding	ENST00000413645	AP000473.5	Ensembl	550	chr21	+	18003145	18012952	TCTGGGAAAAGTCTGCAAAGCTAGTTAGGACATTCAGAAATTCATTTCATTTCAATCCTA	intergenic							556.416	7.20582	9.15031
ASHG19A3A049414	5.53295e-05	4.1584	down	371.143	359.372	397.849	1546.87	1356.42	1420.38	1593.43	8.53711	8.48586	8.67197	10.6745	10.5772	10.695	10.5373	noncoding	ENST00000421002	RP11-380B4.2	Ensembl	903	chr13	-	33451568	33485788	TGAAAGTGGACATTTTTGCCTTGACAACTCCATCTGCTCCTCCTCTATGAAAGCTCCATC	intergenic							1479.28	8.56498	10.621
ASHG19A3L0003401	0.0141472	2.33194	down	12.8942	10.0224	7.46116	41.5632	27.5113	31.2812	30.1884	3.87017	3.7752	3.23225	4.66709	4.84111	5.21136	4.67005	noncoding	BG926920	lincRNA-CSNK1A1	lincRNA	665	chr5	+	148836893	148837488	TCAATAAATCAGAATGTAAGCCAAGCAGCCACCAGAGGCTGACAAGCATATCTGTGGACT	intergenic							32.636	3.62588	4.8474
ASHG19A3A035881	1.20806e-05	14.388	down	27.5433	24.0036	29.2603	455.348	421.832	442.13	465.597	4.94885	4.83643	5.09284	8.80755	8.81629	8.83289	8.76794	noncoding	uc003yao.3	BC062758	UCSC_knowngene	1142	chr8	-	76135660	76190696	ACACATTTGCTGCTTCCATTCTAAACATAAGTTAGAAGAACCTTTCAACTGGATTCCAAC	intergenic							446.227	4.95938	8.80617
ASHG19A3L0002443	0.00412786	3.20958	down	497.472	445.843	530.943	1046.85	1565.76	1683.79	1630.89	8.9197	8.77678	9.04478	10.7124	10.8184	10.1127	10.741	noncoding	DB303228	lincRNA-MYSM1-3	lincRNA	551	chr1	-	59230418	59230967	AAATCAGTAATATATTCACATGGTTTAGTCACCTTCCTCCATCCTGCTGCCTAGAATGTG	intergenic							1481.82	8.91375	10.5961
ASHG19A3L0001607	0.000310276	11.0174	down	11.1982	8.96974	12.9036	167.475	122.237	173.715	171.046	3.67203	3.65279	3.96204	7.28343	7.40272	7.30677	6.90304	noncoding	chr5:159020122-159031247+	lincRNA-ADRA1B-2	lincRNA	11126	chr5	+	159020122	159031247	AGAAATCTGCTGATACACTGAGTATCCATCTGTCTACCAGTGCAGTATGAGACATGAGAC	intergenic							158.618	3.76228	7.22399
ASHG19A3A039563	0.000999887	2.01397	down	22.8179	24.2963	23.4506	54.1974	54.7273	65.6513	66.0369	4.6804	4.85125	4.78017	5.85148	5.95368	5.61449	5.70295	noncoding	ENST00000438499	RP11-1M18.1	Ensembl	517	chrX	-	6585905	6639585	TAGAGATTAACCCTTTCCTGGAAAATGAACGTCTATTGCTTCTTTTGGGGACAGCATGCT	intergenic							60.1532	4.77061	5.78065
ASHG19A3L0001717	0.0252594	2.30003	down	117.963	87.604	105.85	363.284	266.75	272.791	178.627	6.98262	6.56871	6.86547	7.35217	8.09302	8.49152	8.0923	noncoding	DB525109	lincRNA-CENPW-1	lincRNA	483	chr6	+	126397593	126398803	AAGAGTGACTTTCCTTTAACTTTGTCATCACTACAGCATCCAACCTGCCCTGTTCCAGAT	intergenic							270.363	6.8056	8.00725
ASHG19A3L0001016	0.00147314	2.80695	down	30.4415	31.1883	39.6911	123.029	102.063	112.491	121.982	5.08844	5.17921	5.51094	6.77713	6.74232	6.84344	6.63126	noncoding	BI029614	lincRNA-ERF	lincRNA	493	chr19	-	42777698	42778182	TTTAGTCACACCAGAGTCTAAGCTGTCACTCTTGGAAAGTCTGGGGCGGCTCCTCCACCC	intergenic							114.891	5.25953	6.74854
ASHG19A3A029496	0.000316475	2.67985	down	48.8475	85.8428	75.0463	257.119	205.096	223.534	157.843	5.75382	6.53897	6.38924	7.16545	7.78512	7.96222	7.68519	noncoding	ENST00000510784	AL160400.1	Ensembl	1029	chr6	-	25015180	25042398	ACTTAACTTCCAGGATAGCTGCAAGACCCTTTTGTTCCTTTGCCATGAGCAGGTTTTAGG	intergenic							210.898	6.22734	7.6495
ASHG19A3L0000694	0.0075622	4.32292	down	51.8253	104.751	65.8496	593.6	206.306	480.866	224.713	5.83382	6.81454	6.20493	7.69792	8.9467	9.24643	7.6947	noncoding	chr13:95301199-95328649-	lincRNA-GPR180	lincRNA	27451	chr13	-	95301199	95328649	AATTGCCCTTCTTCATGTACTTTCTGTTTTAATTCATGACACACTCTCTGTGGTAGGCAG	intergenic							376.371	6.28443	8.39644
ASHG19A3L0001053	0.048559	4.14646	down	5	5.30499	16.1128	46.5667	32.0665	44.2694	27.8178	2.37766	2.33413	4.27308	4.53981	5.36253	5.38544	4.89957	noncoding	AI017477	lincRNA-TSN-2	lincRNA	464	chr2	-	122660411	122964834	AGTTGTCTTTTATTCTTTTGGATGAGTTCCAACTCTGTTCCCACGGCAGTGCTCCATCCA	intergenic							37.6801	2.99496	5.04684
ASHG19A3A034495	2.03321e-05	2.215	down	294.578	278.121	267.539	627.512	597.447	587.614	654.246	8.21567	8.13609	8.11904	9.33331	9.24922	9.32728	9.30716	noncoding	uc003tvu.2	BC017910	UCSC_knowngene	487	chr7	+	66800962	66805009	CCTGAGAATGGGTCATTTGCAAAGTAAATAAAGGCAATGCCAAACGTCAGTACAACAAGC	intergenic							616.705	8.15693	9.30424
ASHG19A3A049510	7.70772e-05	9.21666	down	8.52999	9.23485	10.9404	117.805	111.042	118.664	120.542	3.29879	3.68465	3.7433	6.75929	6.8292	6.77112	6.75969	noncoding	uc001uzi.1	AX748251	UCSC_knowngene	1961	chr13	-	44835105	44837066	GTGGGGGGTCATGGAATAGGGATGTTAGAGATTAGCAGAAAAGAACTGCAATGATTTAAA	intergenic							117.013	3.57558	6.77982
ASHG19A3A050328	0.00182127	12.2372	down	5	5.53243	5	121.29	61.7296	90.9166	41.3876	2.37766	2.60617	2.39437	5.15311	6.42898	6.82131	5.88698	noncoding	uc001vks.2	BX647243	UCSC_knowngene	6000	chr13	+	78493823	79158296	AAGGCTCTGCACTGAACGTGATAATTGAACTTTTAATGCCAAGTGTCACTTTTCTTTCAG	bidirectional	NM_001122659	EDNRB	endothelin B receptor isoform 1 precursor	-	78469615	78492966	78.831	2.4594	6.07259
ASHG19A3A050328	0.00182127	12.2372	down	5	5.53243	5	121.29	61.7296	90.9166	41.3876	2.37766	2.60617	2.39437	5.15311	6.42898	6.82131	5.88698	noncoding	uc001vks.2	BX647243	UCSC_knowngene	6000	chr13	+	78493823	79158296	AAGGCTCTGCACTGAACGTGATAATTGAACTTTTAATGCCAAGTGTCACTTTTCTTTCAG	bidirectional	NM_003991	EDNRB	endothelin B receptor isoform 2 precursor	-	78469615	78492966	78.831	2.4594	6.07259
ASHG19A3A050328	0.00182127	12.2372	down	5	5.53243	5	121.29	61.7296	90.9166	41.3876	2.37766	2.60617	2.39437	5.15311	6.42898	6.82131	5.88698	noncoding	uc001vks.2	BX647243	UCSC_knowngene	6000	chr13	+	78493823	79158296	AAGGCTCTGCACTGAACGTGATAATTGAACTTTTAATGCCAAGTGTCACTTTTCTTTCAG	natural antisense	NM_001201397	EDNRB	endothelin B receptor isoform 3	-	78469615	78493903	78.831	2.4594	6.07259
ASHG19A3A050328	0.00182127	12.2372	down	5	5.53243	5	121.29	61.7296	90.9166	41.3876	2.37766	2.60617	2.39437	5.15311	6.42898	6.82131	5.88698	noncoding	uc001vks.2	BX647243	UCSC_knowngene	6000	chr13	+	78493823	79158296	AAGGCTCTGCACTGAACGTGATAATTGAACTTTTAATGCCAAGTGTCACTTTTCTTTCAG	intronic antisense	NM_000115	EDNRB	endothelin B receptor isoform 1 precursor	-	78469615	78549664	78.831	2.4594	6.07259
ASHG19A3L0001672	0.00077547	2.3521	down	9.41184	11.2128	14.757	41.8555	37.4888	36.898	33.025	3.43714	3.90585	4.14625	4.80656	5.09035	5.22325	5.13463	noncoding	chr5:67603294-67617869-	lincRNA-PIK3R1-10	lincRNA	14576	chr5	-	67603294	67617869	ACACTGGCATCCAATGCATTTCCCAAAGCATCCTTAAACTTAAGATTTTGCCCCTTCTAA	intergenic							37.3168	3.82974	5.0637
ASHG19A3L0003151	0.00624501	4.52013	down	32.2555	27.2185	31.0138	214.392	191.568	186.575	94.9114	5.16759	5.00066	5.17248	6.39161	7.51133	7.67607	7.58075	noncoding	AA384551	lincRNA-KIF13B	lincRNA	304	chr8	-	29146752	29147056	TTTCGTGCCATTGGTGTTGACAATGACATAATCCTAGCTCTAAGTCGTCTAAGTGTGTTT	intergenic							171.862	5.11358	7.28994
ASHG19A3A030625	0.00325844	4.50011	down	5	5.03577	5	26.2119	17.3387	24.4354	42.1333	2.37766	2.3234	2.39437	5.17826	4.47031	4.52034	3.97149	noncoding	ENST00000455011	RP3-460G2.2	Ensembl	453	chr6	-	141167094	141174061	CTTGTAATACTTTGTTCAAGTTCTGATCAGAAGGATGAATGATGGAGCCCAAGAAGCCAG	intergenic							27.5298	2.36514	4.5351
ASHG19A3A026179	0.0421498	2.66611	down	8.97205	5.34781	11.253	26.7738	21.4227	23.7842	38.1953	3.37286	2.33579	3.78022	5.02797	4.43038	4.55422	4.2982	noncoding	BC043287		misc_RNA	2924	chr1	+	95143530	95146436	TCCCCAAGCCTGTTTATGGCAACAGTCCTTTAATTGTAACCATGTAATTTACTTGAGTAT	intergenic							27.544	3.16296	4.57769
ASHG19A3L0002891	0.0326447	3.42337	down	5.18715	12.5214	5	43.7852	37.9465	34.7491	18.3214	2.74384	4.03447	2.39437	3.88865	4.99635	5.29418	5.15273	noncoding	BI033022	lincRNA-FAM13C	lincRNA	434	chr10	-	61191357	61191768	CATTTAATGCAACAACTTGAACAGAGGTGGGCTCTTTCCACTGGTAACTTAAAGTGGCCA	intergenic							33.7006	3.05756	4.83298
ASHG19A3A045655	0.000243217	2.05151	down	912.924	948.964	879.395	1774.97	1614.07	1728.98	1543.63	9.72928	9.78894	9.74085	10.634	10.8552	10.8857	10.7839	noncoding	AK125021		misc_RNA	4140	chr11	-	107182857	107186997	TAGTACTGGGCATCACATGCTGCTTCCCTTTGTGGCTTTGAATAAACCCTTATTTTCTTG	intergenic							1665.41	9.75302	10.7897
ASHG19A3A015555	0.000256085	2.99674	down	5.04739	5.0199	5	17.6966	17.6233	15.8459	27.899	2.71953	2.32275	2.39437	4.5446	3.79314	3.91332	3.99803	noncoding	ENST00000446698	AC007246.3	Ensembl	593	chr2	+	39681062	39851496	GTGCCAGCTGAACTGTGAACCTCTAAGAATAAGTGAATAAAACGATTTTATGCACTACAA	intergenic							19.7662	2.47888	4.06227
ASHG19A3L0001983	0.000672234	4.93738	down	5	5.11717	5	22.5684	33.9673	30.6009	28.8365	2.37766	2.3267	2.39437	4.59896	4.81004	4.2868	4.98415	noncoding	DB518879	lincRNA-SNTB1-2	lincRNA	458	chr8	-	122348965	122349422	CATGTCCACCAGGAATTCAGATGTTGTAGGTGGTAAGTAAATTCATTGAAAGGATTGAAA	intergenic							28.9933	2.36624	4.66999
ASHG19A3A031860	0.00154745	2.10631	down	12.0292	23.6204	19.6932	57.1321	55.9694	51.633	32.6399	3.76662	4.81554	4.54742	4.7897	5.59025	5.68844	5.73658	noncoding	ENST00000439279	RP11-436D23.1	Ensembl	226	chr6	+	98723021	98727735	GTCGCTTCTTAGGCTTCCTGCCAGATTTTGAAAACCACTATAACTAGTCGTTTCTGCCAA	intergenic							49.3436	4.37653	5.45125
ASHG19A3A051788	0.000469817	7.27426	down	42.3662	41.4128	55.9692	375.765	339.5	410.548	394.89	5.54865	5.55543	5.98523	8.55377	8.69921	8.5385	8.44547	noncoding	NR_024149	MEG8	RefSeq_NR	501	chr14	+	101361106	101373305	TAGATTCTTTAGAATAGAACTAACTCAAGCCCTTCATTCTGCAGCTGAGGCTCACTGCCC	intergenic							380.176	5.69644	8.55924
ASHG19A3L0000407	0.00219401	2.08303	down	11.2414	7.76226	8.06618	28.2199	22.1748	22.3957	36.0407	3.67587	3.50484	3.33266	4.94411	4.33457	4.6309	4.34297	noncoding	DB307107	lincRNA-LRRC32-2	lincRNA	548	chr11	+	76336505	76337049	TGGGGATGAAGCATGGGTTGGCGAGCTTGCCTGTACCTGGGGAGAGCTGCAGAGGAAGAG	intergenic							27.2078	3.50446	4.56314
ASHG19A3L0000360	0.00294104	7.28352	down	11.8535	14.8199	12.6941	175.58	135.022	154.478	59.8402	3.74987	4.23566	3.93987	5.70284	7.22658	7.37732	7.05233	noncoding	exon680-	lincRNA-METT5D1-4	lincRNA	225	chr11	-	29339607	29339831	TCTTTAATTGAAATGATCTCTATGAACAGCTGCCAGGTGAGTTGGGTGAGTGTGGGTGAG								131.23	3.97513	6.83977
ASHG19A3A050269	4.36987e-05	3.90479	down	207.864	247.696	216.552	799.886	815.005	921.187	930.036	7.7498	7.97712	7.83366	9.87098	9.9271	9.70369	9.7733	noncoding	ENST00000437705	RP11-248N6.2	Ensembl	862	chr13	+	68485218	68486080	TGGTTTGCTGATTTTATGGAACAGGCGTTGGAGGGTACCTCAGTTCAGATGTGTCATCTT	intergenic							866.528	7.85352	9.81877
ASHG19A3L0001365	0.000431446	4.40116	down	20.2508	21.3868	23.2064	102.962	114.774	122.818	132.82	4.50744	4.68983	4.76537	6.90237	6.88076	6.57643	6.80883	noncoding	AK310298	lincRNA-ZNF385D	lincRNA	1050	chr3	-	21478503	22414123	ATAGCTCATGTCCTTCTACTGAGACCGAGGAAGAAAAGGCAAAACGGCTTCTTTACTGGT	exon sense-overlapping	NM_024697	ZNF385D	zinc finger protein 385D	-	21462489	21792816	118.344	4.65421	6.79209
ASHG19A3A023754	0.000189595	3.04856	down	22.8394	18.6096	19.2424	84.2909	73.543	76.977	78.3324	4.68175	4.51854	4.51499	6.10821	6.1838	6.28416	6.14338	noncoding	uc003fux.1	AK128346	UCSC_knowngene	2732	chr3	+	195426821	195438745	ATGTCAAAATTACCTCTGCTTGGGTGAGCTATTTCAAGCAGCTGGGATACCTGTGTCACT	intergenic							78.2858	4.57176	6.17988
ASHG19A3L0002974	0.0113988	2.4275	down	5	9.32459	7.23895	24.5176	31.87	22.4477	17.7316	2.37766	3.69517	3.19735	3.8352	4.33971	4.41386	4.88934	noncoding	chr17:72383376-72409968-	lincRNA-GPR142	lincRNA	26593	chr17	-	72383376	72409968	ATAAATCCCTTTCACTGTGTAGCCCTATAATATGGTCAAGGGAGTAACTCTGGGGACAGG	intergenic							24.1417	3.09006	4.36953
ASHG19A3A036917	0.00385664	5.03264	down	10.0916	5.2782	5	39.1054	39.1711	33.6282	39.5526	3.54042	2.33309	2.39437	5.0791	4.9469	5.12311	5.19997	noncoding	AF086468		misc_RNA	639	chr8	+	126964460	126965089	GTATATGCTAGGCTGGTAGTTTTACGTTGAGGATTCACTTCACTTATCTATGCATTTTTA	intergenic							37.8643	2.75596	5.08727
ASHG19A3L0002318	1.4867e-05	8.31804	down	5	5.00685	5	52.4238	43.2786	41.6984	52.1081	2.37766	2.32221	2.39437	5.49791	5.27172	5.56781	5.34652	noncoding	BI495452	lincRNA-KLF8-1	lincRNA	600	chrX	-	56522481	56523074	GCCCAGGTTAGAATGTATTTAGTGGATGGACATGCAAAACATGATTCACAGCATGCACAG	intergenic							47.3772	2.36474	5.42099
ASHG19A3L0002806	0.00664007	2.03702	down	44.7387	45.422	54.2546	111.039	104.07	118.671	134.662	5.62565	5.68036	5.94114	6.92392	6.82955	6.68694	6.66164	noncoding	chr3:46129526-46140202+	lincRNA-CCR1	lincRNA	10677	chr3	+	46129526	46140202	TTTCAACATACTTCCTGCTTTTCTTGCAAAACAGAGAAGACTCACTCCTCTGTGGGAGGC	intergenic							117.11	5.74905	6.77551
ASHG19A3L0001258	0.0123129	5.18635	down	5	31.0029	11.7135	124.15	114.048	84.4174	30.935	2.37766	5.17069	3.83425	4.7058	6.31477	6.85543	6.79967	noncoding	exon2440-	lincRNA-CEBPB-1	lincRNA	141	chr20	-	49051596	49051736	TTTTTTTTGGCTCGCTTGTTCACTTGTGTGTGCTTAGTGTTTGTCTTCCACAGGAGAAAG								88.3875	3.7942	6.16892
ASHG19A3A041604	6.44053e-07	9.03094	down	298.656	298.506	295.132	2582.31	2403.43	2517.25	2694.93	8.23678	8.22508	8.25902	11.4406	11.4148	11.4372	11.3681	noncoding	ENST00000431464	RP11-308D16.4	Ensembl	646	chrX	+	135991633	136103777	GCCCTTGAATATCTGTATATCTATATGAACATCAATTGAGATATATATGTGTGTGCCCCT	intergenic							2549.48	8.2403	11.4152
ASHG19A3L0002206	0.00641886	2.11651	down	406.237	391.419	447.184	672.926	880.231	915.653	917.118	8.65552	8.6017	8.82024	9.85452	9.91677	9.43382	9.89158	noncoding	chr9:137160729-137173954-	lincRNA-WDR5-2	lincRNA	13226	chr9	-	137160729	137173954	AAACACACACACACACACACAGTCTTGAATCCTGCTCTCGGGGTCCGTCTCAGGCACTGT	intergenic							846.482	8.69249	9.77417
ASHG19A3A012639	0.000388587	3.11389	down	5	5.1223	5	18.376	17.7802	15.7015	23.2117	2.37766	2.32691	2.39437	4.2629	3.77497	3.97198	4.01028	noncoding	CR591832		misc_RNA	1228	chr1	-	234794726	234795953	TTTAATAAGAAGGAAGCCCTGATGAATGTCACAAAGCCAATAAATGTGGCCACCACCACG	intergenic							18.7674	2.36631	4.00503
ASHG19A3L0002153	0.000229278	2.05416	down	2365.63	1975.1	2263.49	3890.25	3787.53	3706.75	4020.31	11.0605	10.8088	11.0574	12.0152	11.9699	12.0348	12.0366	noncoding	BF803219	lincRNA-RIPK2-4	lincRNA	175	chr8	+	90226145	90226296	TCCTAGCTGTGATTTTCTTGCTCCCCCTTGCTATATTTATTCTGGGCACACATTATGGAG	intergenic							3851.21	10.9756	12.0141
ASHG19A3A025001	0.000287653	3.41418	down	23.5976	25.6595	25.1417	117.265	91.6549	98.2947	114.174	4.72783	4.91842	4.87871	6.67414	6.54575	6.76335	6.46953	noncoding	AK091103		misc_RNA	1924	chr4	-	174289045	174290964	GCTGCATCTTTACTAGTTAGCTACCATGCGTCATTATTTATCAAAAGATATATGCTGCTT	intergenic							105.347	4.84165	6.61319
ASHG19A3A049262	7.11812e-05	2.24511	down	1848.45	1898.06	1857.98	3518.31	3407.14	3587.19	3876.56	10.7068	10.7555	10.781	11.9666	11.9214	11.8931	11.8772	noncoding	NR_003272	PSPC1	RefSeq_NR	1716	chr13	-	20248895	20357083	GCTTGCAGTGTAATTCAGAAGAGTTAAGACCAGAAGTACTGGAATCATACTTCCTTTCAG	exon sense-overlapping	NM_001042414	PSPC1	paraspeckle component 1	-	20277008	20357083	3597.3	10.7478	11.9146
ASHG19A3A047500	4.47433e-05	3.01771	down	1127.21	1104.6	1050.64	2978.3	2531.12	2922.72	3046.64	10.0159	9.98743	9.97612	11.6266	11.6273	11.6446	11.4479	noncoding	NR_028408	LOC400027	RefSeq_NR	2202	chr12	-	46119502	46121704	CCTGACAAAGTAATGTTAGAGATGTGCTGACAGCTTTACAATAGATATTCTCCAACTAAT	intergenic							2869.69	9.99315	11.5866
ASHG19A3L0000256	2.01327e-06	11.3018	down	265.333	265.267	273.8	2972.57	2713.22	2910.66	2943.33	8.07118	8.06955	8.15509	11.5786	11.6219	11.6409	11.5469	noncoding	DQ269985	lincRNA-AKR1C3-2	lincRNA	972	chr10	+	5005636	5149693	CAGCCTTGGAAAGGTCACTGAAAAAAGCTCAATTGGACTATGTTGACCTCTATCTTATTC	intronic antisense	NM_001354	AKR1C2	aldo-keto reductase family 1 member C2 isoform	-	5031964	5060207	2884.95	8.09861	11.5971
ASHG19A3L0000256	2.01327e-06	11.3018	down	265.333	265.267	273.8	2972.57	2713.22	2910.66	2943.33	8.07118	8.06955	8.15509	11.5786	11.6219	11.6409	11.5469	noncoding	DQ269985	lincRNA-AKR1C3-2	lincRNA	972	chr10	+	5005636	5149693	CAGCCTTGGAAAGGTCACTGAAAAAAGCTCAATTGGACTATGTTGACCTCTATCTTATTC	intronic antisense	NM_001135241	AKR1C2	aldo-keto reductase family 1 member C2 isoform	-	5042102	5046053	2884.95	8.09861	11.5971
ASHG19A3L0000256	2.01327e-06	11.3018	down	265.333	265.267	273.8	2972.57	2713.22	2910.66	2943.33	8.07118	8.06955	8.15509	11.5786	11.6219	11.6409	11.5469	noncoding	DQ269985	lincRNA-AKR1C3-2	lincRNA	972	chr10	+	5005636	5149693	CAGCCTTGGAAAGGTCACTGAAAAAAGCTCAATTGGACTATGTTGACCTCTATCTTATTC	exon sense-overlapping	NM_003739	AKR1C3	aldo-keto reductase family 1 member C3	+	5136567	5149878	2884.95	8.09861	11.5971
ASHG19A3L0000256	2.01327e-06	11.3018	down	265.333	265.267	273.8	2972.57	2713.22	2910.66	2943.33	8.07118	8.06955	8.15509	11.5786	11.6219	11.6409	11.5469	noncoding	DQ269985	lincRNA-AKR1C3-2	lincRNA	972	chr10	+	5005636	5149693	CAGCCTTGGAAAGGTCACTGAAAAAAGCTCAATTGGACTATGTTGACCTCTATCTTATTC	exon sense-overlapping	NM_001353	AKR1C1	aldo-keto reductase family 1 member C1	+	5005453	5020158	2884.95	8.09861	11.5971
ASHG19A3L0000256	2.01327e-06	11.3018	down	265.333	265.267	273.8	2972.57	2713.22	2910.66	2943.33	8.07118	8.06955	8.15509	11.5786	11.6219	11.6409	11.5469	noncoding	DQ269985	lincRNA-AKR1C3-2	lincRNA	972	chr10	+	5005636	5149693	CAGCCTTGGAAAGGTCACTGAAAAAAGCTCAATTGGACTATGTTGACCTCTATCTTATTC	intronic antisense	NM_205845	AKR1C2	aldo-keto reductase family 1 member C2 isoform	-	5031964	5060207	2884.95	8.09861	11.5971
ASHG19A3L0001977	0.00485686	4.31755	down	16.3276	30.5213	19.2953	153.71	137.688	132.705	58.462	4.19249	5.14903	4.52034	5.66947	6.99813	7.17209	7.08366	noncoding	CD357052	lincRNA-MED30-2	lincRNA	743	chr8	-	118758199	118758929	TGATAAACCGGGCCACAAACCCCTTTTATCACTTTTATTATGTAGGTCCAACCTTAGCCT	intergenic							120.641	4.62062	6.73084
ASHG19A3L0003526	0.00093116	2.15308	down	172.821	159.302	196.672	394.687	390.851	374.776	439.958	7.49854	7.38394	7.7082	8.72127	8.55952	8.61356	8.65217	noncoding	CR745936	lincRNA-BANF2-1	lincRNA	532	chr20	-	17806254	17807629	ATCACTCGTGTTTTGTGCCTCTGCTTCTACCACTTCATAGCACTGTGGTGTTTAATCTCG	intergenic							400.068	7.53023	8.63663
ASHG19A3A013747	0.000117396	19.2229	down	5.63611	5.77721	5	144.814	123.404	126.141	146.519	2.82147	2.97611	2.39437	7.05763	6.92152	7.08378	6.91871	noncoding	ENST00000449259	AC007386.2	Ensembl	2928	chr2	-	65128973	65132271	GGGAGACCTCTGTAATTGTGTACCATGTGCATATATTACCTATTCAGAGAATAATAAAAC	intergenic							135.22	2.73065	6.99541
ASHG19A3A026748	0.000313474	2.24821	down	701.166	658.365	757.752	1427.45	1384.02	1417.08	1473.65	9.38135	9.293	9.53531	10.5666	10.5737	10.5796	10.568	noncoding	uc003jnb.1	AK056817	UCSC_knowngene	2757	chr5	-	42985502	42993435	ATATTTCAATAAAAATCTGCACTTTGTGAGTTGAGCCCCCTCAAAGAGACCTACAGACCC	intergenic							1425.55	9.40322	10.572
ASHG19A3L0003348	0.00648586	3.79672	down	8.25614	6.25392	5	31.066	34.1325	24.6801	46.7883	3.25177	3.27065	2.39437	5.33552	4.48427	4.77662	4.99165	noncoding	AI248355	lincRNA-HAAO-2	lincRNA	426	chr2	-	43306642	43307067	AAATGTATTAGGGTGCATTCCAGGGTGCAGTAGCTATAGATAAATAGGGTGCTGGGGTTG	intergenic							34.1667	2.97226	4.89702
ASHG19A3A026815	3.07384e-06	4.98422	down	40.5926	46.3324	48.3708	267.946	256.281	261.093	243.95	5.48658	5.70781	5.78619	7.83103	8.02003	8.02271	8.03649	noncoding	ENST00000502919	CTC-236F12.2	Ensembl	473	chr5	-	55750098	55750571	ACATGCGCTGGATTGACCTAAACTGCAACATGGCCCTTGTAATTATACCGTGCTTTTGCT	intergenic							257.318	5.6602	7.97756
ASHG19A3A012632	7.84137e-05	3.0481	down	845.764	823.279	804.336	2272.13	2243.24	1980.68	2470.82	9.62694	9.60181	9.61806	11.3192	11.0546	11.2527	11.2675	noncoding	NR_024279	FLJ37453	RefSeq_NR	2732	chr1	-	16160709	16174642	CGGGTTTATAGCCCATTATTTATATCGGAGCCATAAACTTGAACAATAGATTGGAATATC	natural antisense	NM_015001	SPEN	msx2-interacting protein	+	16174358	16266950	2241.72	9.6156	11.2235
ASHG19A3L0001225	5.05692e-06	10.4707	down	38.7179	41.5012	36.8097	466.661	402.385	478.47	491.613	5.42378	5.55862	5.40914	8.89817	8.93935	8.87813	8.6929	noncoding	T93829	lincRNA-DNAH6	lincRNA	232	chr2	+	84686762	84745135	AGACAATGAATCTGATACACAAATCCTAACGTTTAGGCACATTACACATGCTCAGGTGAA	bidirectional	NM_003849	SUCLG1	succinyl-CoA ligase [GDP-forming] subunit alpha,	-	84650646	84686586	459.782	5.46385	8.85214
ASHG19A3L0001225	5.05692e-06	10.4707	down	38.7179	41.5012	36.8097	466.661	402.385	478.47	491.613	5.42378	5.55862	5.40914	8.89817	8.93935	8.87813	8.6929	noncoding	T93829	lincRNA-DNAH6	lincRNA	232	chr2	+	84686762	84745135	AGACAATGAATCTGATACACAAATCCTAACGTTTAGGCACATTACACATGCTCAGGTGAA	exon sense-overlapping	NM_001370	DNAH6	dynein heavy chain 6, axonemal	+	84743578	85046713	459.782	5.46385	8.85214
ASHG19A3L0000432	0.0229441	2.11502	down	28.0785	34.5035	21.7458	87.6464	78.3644	75.4586	53.6183	4.97405	5.31376	4.67905	5.54246	6.1549	6.34343	6.23771	noncoding	CN284611	lincRNA-CUX2	lincRNA	731	chr12	+	111378154	111378886	AAGAAGTTGAAGAAAAAGGGTACACACAAGCCAGGTCACCTAACCCATAACCCATGCATG	intergenic							73.7719	4.98895	6.06962
ASHG19A3L0001525	0.0196971	2.18595	down	19.4658	13.617	19.4485	86.2175	48.6691	32.2969	44.7033	4.45132	4.1336	4.53051	5.2695	4.8885	6.31801	5.52428	noncoding	exon2911-	lincRNA-AREG	lincRNA	160	chr4	-	75585748	75585907	GGTTTTACCCTGGGGCCCATCTTTTATCACATTATTTTGAAAATCCTAAATTACCTGTAA								52.9717	4.37181	5.50007
ASHG19A3A018944	0.0200117	7.35786	down	5	9.77543	5	104.41	87.2028	67.0001	18.4699	2.37766	3.7464	2.39437	3.90069	5.98358	6.59544	6.39533	noncoding	ENST00000442815	AP001046.5	Ensembl	2798	chr21	-	44778026	44782229	ATCCAGATGTGAACTGTGGCTGTTGTTTGCAATTGAAGCAGAGATGCAGAGGATGGAACA	intergenic							69.2706	2.83948	5.71876
ASHG19A3L0000081	3.48728e-05	3.65927	down	68.6773	62.0996	66.5092	278.466	244.154	267.438	295.646	6.23176	6.10004	6.21994	8.12495	8.05928	8.08156	7.95609	noncoding	AW572416	lincRNA-WNT4	lincRNA	350	chr1	-	22585663	22585982	TTGTTGCCTTCTCTAGAGCCTTCCAGAATTATCCAAGAACCACACAAAGCCTTTGTGGGT	intergenic							271.426	6.18391	8.05547
ASHG19A3A032074	0.000226057	5.8161	down	37.2943	38.318	26.3124	205.548	233.162	227.51	252.847	5.37159	5.45461	4.94675	7.8873	7.81008	7.61356	7.87986	noncoding	ENST00000435287	RP11-69I8.3	Ensembl	495	chr6	+	132272085	132398533	CAACTTCAATAAGAGTAACTTGGACAACCTGAGGCATTAATTGAGGATCAATATGATGAC	natural antisense	NM_001901	CTGF	connective tissue growth factor precursor	-	132269316	132272518	229.767	5.25765	7.7977
ASHG19A3L0000526	1.93609e-06	137.802	down	101.073	88.344	83.9538	12941.9	11478.5	12277.5	12679.5	6.77359	6.57929	6.55245	13.7171	13.7389	13.8248	13.6854	noncoding	BC070168	lincRNA-TSPAN8	lincRNA	1543	chr12	-	71518868	71835678	CTAGACCACAGATATCTTCTAGACATATTGAACACATTTAAGATTTGAGGGATATAAGGG	intronic antisense	NM_003667	LGR5	leucine-rich repeat-containing G-protein coupled	+	71833812	71978621	12344.4	6.63511	13.7416
ASHG19A3L0000526	1.93609e-06	137.802	down	101.073	88.344	83.9538	12941.9	11478.5	12277.5	12679.5	6.77359	6.57929	6.55245	13.7171	13.7389	13.8248	13.6854	noncoding	BC070168	lincRNA-TSPAN8	lincRNA	1543	chr12	-	71518868	71835678	CTAGACCACAGATATCTTCTAGACATATTGAACACATTTAAGATTTGAGGGATATAAGGG	exon sense-overlapping	NM_004616	TSPAN8	tetraspanin-8	-	71518876	71551779	12344.4	6.63511	13.7416
ASHG19A3L0003269	0.0225231	2.24637	down	9.11709	9.17302	14.0386	41.3454	46.5852	37.4058	16.8601	3.39534	3.67627	4.07417	3.75614	5.10941	5.20446	5.46143	noncoding	AW364455	lincRNA-C16orf45	lincRNA	535	chr16	+	15462374	16047393	AGGAAACAACTTGGTATTAAGCAGTATAGTGTGGTGGCTCAGAGCAAATTCGCCTCTGCT	intronic antisense	NM_022844	MYH11	myosin-11 isoform SM2A	-	15796991	15950887	35.5491	3.71526	4.88286
ASHG19A3L0003269	0.0225231	2.24637	down	9.11709	9.17302	14.0386	41.3454	46.5852	37.4058	16.8601	3.39534	3.67627	4.07417	3.75614	5.10941	5.20446	5.46143	noncoding	AW364455	lincRNA-C16orf45	lincRNA	535	chr16	+	15462374	16047393	AGGAAACAACTTGGTATTAAGCAGTATAGTGTGGTGGCTCAGAGCAAATTCGCCTCTGCT	intron sense-overlapping	NM_004996	ABCC1	multidrug resistance-associated protein 1	+	16043433	16236930	35.5491	3.71526	4.88286
ASHG19A3L0003269	0.0225231	2.24637	down	9.11709	9.17302	14.0386	41.3454	46.5852	37.4058	16.8601	3.39534	3.67627	4.07417	3.75614	5.10941	5.20446	5.46143	noncoding	AW364455	lincRNA-C16orf45	lincRNA	535	chr16	+	15462374	16047393	AGGAAACAACTTGGTATTAAGCAGTATAGTGTGGTGGCTCAGAGCAAATTCGCCTCTGCT	intron sense-overlapping	NM_019899	ABCC1	multidrug resistance-associated protein 1	+	16043433	16236930	35.5491	3.71526	4.88286
ASHG19A3L0003269	0.0225231	2.24637	down	9.11709	9.17302	14.0386	41.3454	46.5852	37.4058	16.8601	3.39534	3.67627	4.07417	3.75614	5.10941	5.20446	5.46143	noncoding	AW364455	lincRNA-C16orf45	lincRNA	535	chr16	+	15462374	16047393	AGGAAACAACTTGGTATTAAGCAGTATAGTGTGGTGGCTCAGAGCAAATTCGCCTCTGCT	intron sense-overlapping	NM_001143979	NDE1	nuclear distribution protein nudE homolog 1	+	15737123	15820208	35.5491	3.71526	4.88286
ASHG19A3L0003269	0.0225231	2.24637	down	9.11709	9.17302	14.0386	41.3454	46.5852	37.4058	16.8601	3.39534	3.67627	4.07417	3.75614	5.10941	5.20446	5.46143	noncoding	AW364455	lincRNA-C16orf45	lincRNA	535	chr16	+	15462374	16047393	AGGAAACAACTTGGTATTAAGCAGTATAGTGTGGTGGCTCAGAGCAAATTCGCCTCTGCT	intronic antisense	NM_002474	MYH11	myosin-11 isoform SM1A	-	15796991	15950887	35.5491	3.71526	4.88286
ASHG19A3L0003269	0.0225231	2.24637	down	9.11709	9.17302	14.0386	41.3454	46.5852	37.4058	16.8601	3.39534	3.67627	4.07417	3.75614	5.10941	5.20446	5.46143	noncoding	AW364455	lincRNA-C16orf45	lincRNA	535	chr16	+	15462374	16047393	AGGAAACAACTTGGTATTAAGCAGTATAGTGTGGTGGCTCAGAGCAAATTCGCCTCTGCT	intron sense-overlapping	NM_033201	C16orf45	hypothetical protein LOC89927 isoform 1	+	15528324	15682116	35.5491	3.71526	4.88286
ASHG19A3L0003269	0.0225231	2.24637	down	9.11709	9.17302	14.0386	41.3454	46.5852	37.4058	16.8601	3.39534	3.67627	4.07417	3.75614	5.10941	5.20446	5.46143	noncoding	AW364455	lincRNA-C16orf45	lincRNA	535	chr16	+	15462374	16047393	AGGAAACAACTTGGTATTAAGCAGTATAGTGTGGTGGCTCAGAGCAAATTCGCCTCTGCT	intron sense-overlapping	NM_017668	NDE1	nuclear distribution protein nudE homolog 1	+	15744082	15820208	35.5491	3.71526	4.88286
ASHG19A3L0003269	0.0225231	2.24637	down	9.11709	9.17302	14.0386	41.3454	46.5852	37.4058	16.8601	3.39534	3.67627	4.07417	3.75614	5.10941	5.20446	5.46143	noncoding	AW364455	lincRNA-C16orf45	lincRNA	535	chr16	+	15462374	16047393	AGGAAACAACTTGGTATTAAGCAGTATAGTGTGGTGGCTCAGAGCAAATTCGCCTCTGCT	intron sense-overlapping	NM_001142469	C16orf45	hypothetical protein LOC89927 isoform 2	+	15596122	15682116	35.5491	3.71526	4.88286
ASHG19A3L0003269	0.0225231	2.24637	down	9.11709	9.17302	14.0386	41.3454	46.5852	37.4058	16.8601	3.39534	3.67627	4.07417	3.75614	5.10941	5.20446	5.46143	noncoding	AW364455	lincRNA-C16orf45	lincRNA	535	chr16	+	15462374	16047393	AGGAAACAACTTGGTATTAAGCAGTATAGTGTGGTGGCTCAGAGCAAATTCGCCTCTGCT	intron sense-overlapping	NM_019898	ABCC1	multidrug resistance-associated protein 1	+	16043433	16236930	35.5491	3.71526	4.88286
ASHG19A3L0003269	0.0225231	2.24637	down	9.11709	9.17302	14.0386	41.3454	46.5852	37.4058	16.8601	3.39534	3.67627	4.07417	3.75614	5.10941	5.20446	5.46143	noncoding	AW364455	lincRNA-C16orf45	lincRNA	535	chr16	+	15462374	16047393	AGGAAACAACTTGGTATTAAGCAGTATAGTGTGGTGGCTCAGAGCAAATTCGCCTCTGCT	intronic antisense	NM_001184999	KIAA0430	limkain-b1 isoform 3	-	15688225	15737023	35.5491	3.71526	4.88286
ASHG19A3L0003269	0.0225231	2.24637	down	9.11709	9.17302	14.0386	41.3454	46.5852	37.4058	16.8601	3.39534	3.67627	4.07417	3.75614	5.10941	5.20446	5.46143	noncoding	AW364455	lincRNA-C16orf45	lincRNA	535	chr16	+	15462374	16047393	AGGAAACAACTTGGTATTAAGCAGTATAGTGTGGTGGCTCAGAGCAAATTCGCCTCTGCT	intronic antisense	NM_001040113	MYH11	myosin-11 isoform SM2B	-	15796991	15950887	35.5491	3.71526	4.88286
ASHG19A3L0003269	0.0225231	2.24637	down	9.11709	9.17302	14.0386	41.3454	46.5852	37.4058	16.8601	3.39534	3.67627	4.07417	3.75614	5.10941	5.20446	5.46143	noncoding	AW364455	lincRNA-C16orf45	lincRNA	535	chr16	+	15462374	16047393	AGGAAACAACTTGGTATTAAGCAGTATAGTGTGGTGGCTCAGAGCAAATTCGCCTCTGCT	intron sense-overlapping	NM_019900	ABCC1	multidrug resistance-associated protein 1	+	16043433	16236930	35.5491	3.71526	4.88286
ASHG19A3L0003269	0.0225231	2.24637	down	9.11709	9.17302	14.0386	41.3454	46.5852	37.4058	16.8601	3.39534	3.67627	4.07417	3.75614	5.10941	5.20446	5.46143	noncoding	AW364455	lincRNA-C16orf45	lincRNA	535	chr16	+	15462374	16047393	AGGAAACAACTTGGTATTAAGCAGTATAGTGTGGTGGCTCAGAGCAAATTCGCCTCTGCT	intronic antisense	NM_144600	FOPNL	lisH domain-containing protein FOPNL	-	15959576	15982447	35.5491	3.71526	4.88286
ASHG19A3L0003269	0.0225231	2.24637	down	9.11709	9.17302	14.0386	41.3454	46.5852	37.4058	16.8601	3.39534	3.67627	4.07417	3.75614	5.10941	5.20446	5.46143	noncoding	AW364455	lincRNA-C16orf45	lincRNA	535	chr16	+	15462374	16047393	AGGAAACAACTTGGTATTAAGCAGTATAGTGTGGTGGCTCAGAGCAAATTCGCCTCTGCT	intron sense-overlapping	NM_019862	ABCC1	multidrug resistance-associated protein 1	+	16043433	16236930	35.5491	3.71526	4.88286
ASHG19A3L0003269	0.0225231	2.24637	down	9.11709	9.17302	14.0386	41.3454	46.5852	37.4058	16.8601	3.39534	3.67627	4.07417	3.75614	5.10941	5.20446	5.46143	noncoding	AW364455	lincRNA-C16orf45	lincRNA	535	chr16	+	15462374	16047393	AGGAAACAACTTGGTATTAAGCAGTATAGTGTGGTGGCTCAGAGCAAATTCGCCTCTGCT	intron sense-overlapping	NM_173803	MPV17L	mpv17-like protein isoform 2	+	15489610	15503543	35.5491	3.71526	4.88286
ASHG19A3L0003269	0.0225231	2.24637	down	9.11709	9.17302	14.0386	41.3454	46.5852	37.4058	16.8601	3.39534	3.67627	4.07417	3.75614	5.10941	5.20446	5.46143	noncoding	AW364455	lincRNA-C16orf45	lincRNA	535	chr16	+	15462374	16047393	AGGAAACAACTTGGTATTAAGCAGTATAGTGTGGTGGCTCAGAGCAAATTCGCCTCTGCT	intronic antisense	NM_014647	KIAA0430	limkain-b1 isoform 1	-	15688225	15737023	35.5491	3.71526	4.88286
ASHG19A3L0003269	0.0225231	2.24637	down	9.11709	9.17302	14.0386	41.3454	46.5852	37.4058	16.8601	3.39534	3.67627	4.07417	3.75614	5.10941	5.20446	5.46143	noncoding	AW364455	lincRNA-C16orf45	lincRNA	535	chr16	+	15462374	16047393	AGGAAACAACTTGGTATTAAGCAGTATAGTGTGGTGGCTCAGAGCAAATTCGCCTCTGCT	intronic antisense	NM_001184998	KIAA0430	limkain-b1 isoform 2	-	15688225	15737023	35.5491	3.71526	4.88286
ASHG19A3L0003269	0.0225231	2.24637	down	9.11709	9.17302	14.0386	41.3454	46.5852	37.4058	16.8601	3.39534	3.67627	4.07417	3.75614	5.10941	5.20446	5.46143	noncoding	AW364455	lincRNA-C16orf45	lincRNA	535	chr16	+	15462374	16047393	AGGAAACAACTTGGTATTAAGCAGTATAGTGTGGTGGCTCAGAGCAAATTCGCCTCTGCT	intronic antisense	NM_001040114	MYH11	myosin-11 isoform SM1B	-	15796991	15950887	35.5491	3.71526	4.88286
ASHG19A3L0003269	0.0225231	2.24637	down	9.11709	9.17302	14.0386	41.3454	46.5852	37.4058	16.8601	3.39534	3.67627	4.07417	3.75614	5.10941	5.20446	5.46143	noncoding	AW364455	lincRNA-C16orf45	lincRNA	535	chr16	+	15462374	16047393	AGGAAACAACTTGGTATTAAGCAGTATAGTGTGGTGGCTCAGAGCAAATTCGCCTCTGCT	intron sense-overlapping	NM_001128423	MPV17L	mpv17-like protein isoform 1	+	15489610	15503543	35.5491	3.71526	4.88286
ASHG19A3A029433	0.0020053	7.94225	down	8.15676	6.8547	5	72.2358	70.9034	65.0499	67.3512	3.23282	3.37129	2.39437	5.88168	5.93992	6.04555	6.08901	noncoding	ENST00000414740	RP11-330A16.1	Ensembl	147	chr6	-	14597744	14599921	AAGAAAAAGGAGAATTTGGGCTTGCACTGAGAGGATTACCTTTGGTGGTCTGGAAGTGGT	intergenic							68.8851	2.99949	5.98904
ASHG19A3A007112	0.000135273	2.14184	down	30596.5	30388	30236.3	51260.5	46081.3	50696	51875.3	14.6499	14.6854	14.7138	15.7661	15.8112	15.8717	15.6784	noncoding	NR_003038	SNHG5	RefSeq_NR	524	chr6	-	86386725	86388451	TGGTTAAAACCTGACACTTTTAACAGTGAACAGCGTTCTGAGTGTGGACGAGTAGCCAGT	intergenic							49978.3	14.683	15.7819
ASHG19A3L0001522	1.98476e-05	2.42182	down	65.9361	51.1375	56.4258	165.645	149.333	143.557	198.134	6.17368	5.84089	5.9967	7.51024	7.11287	7.29062	7.20564	noncoding	chr4:71997061-72013886+	lincRNA-SLC4A4	lincRNA	16826	chr4	+	71997061	72013886	CTTGCCCTCCAAAGTTCAGGTAAGTGACTAGATTCACAAACTTATTTCAGAATGCCAGGA	intergenic							164.167	6.00376	7.27984
ASHG19A3L0002290	0.00289651	3.11865	down	23.1639	18.2205	25.2211	94.7161	97.8088	93.9765	65.3121	4.70428	4.49156	4.88333	5.83586	6.4782	6.45648	6.56539	noncoding	chrX:38716431-38792681-	lincRNA-MID1IP1-9	lincRNA	76251	chrX	-	38716431	38792681	ATCACCACCACAACATACACTGTGTTTCAATCTATCAGGAGCTCAAATTTGATCAGCTTT	intergenic							87.9534	4.69306	6.33398
ASHG19A3A029432	4.38073e-06	17.2013	down	5	5.21401	5	99.239	96.0113	82.1607	105.134	2.37766	2.33057	2.39437	6.54678	6.2758	6.52236	6.54296	noncoding	ENST00000456440	RP3-448I9.2	Ensembl	489	chr6	-	14391461	14393519	GAGTCTTTTAATGAGCCGTTTCATAATGAGGGCTGAATCTACACACAGTATCTACATGCT	intergenic							95.6363	2.36753	6.47197
ASHG19A3L0000951	0.00398061	3.34714	down	456.541	608.85	572.693	1152.94	1844.44	1937.35	1879.95	8.81517	9.18993	9.14815	10.9152	11.0258	10.2561	10.979	noncoding	BM466146	lincRNA-ZNF396	lincRNA	793	chr18	-	33026128	33026905	GGGCATCCATCCTCTTCCTTCTTGGCCCAGTGAAGACTATCCGTGGACCCCCATTTACAA	intergenic							1703.67	9.05108	10.794
ASHG19A3A052917	7.35035e-06	17.3963	down	47.0755	43.15	39.2408	827.283	788.502	810.989	822.271	5.69907	5.61187	5.49723	9.68205	9.73342	9.75513	9.72314	noncoding	NR_024433	LOC283663	RefSeq_NR	2534	chr15	+	57592562	57599963	TCATTTAACCCCAAAATCAGTGATTCTACATCTCAAGCTCATATTTTGAAGTGTTTACGG	intergenic							812.261	5.60272	9.72343
ASHG19A3L0003044	0.000286815	2.07714	down	162.091	139.99	136.113	347.42	282.155	315.144	363.037	7.41572	7.21153	7.20877	8.4264	8.30685	8.42358	8.17625	noncoding	chr14:93595225-93603463-	lincRNA-ITPK1	lincRNA	8239	chr14	-	93595225	93603463	AGATTTCAAAACTCCAGGGTACTGCCTTGCTCTCTGAGTATTTCCTTCCTTCTTTCCTCT	intergenic							326.939	7.27867	8.33327
ASHG19A3L0000823	7.78481e-05	3.03477	down	25.953	20.0217	28.0583	103.833	90.0228	80.4545	100.66	4.86964	4.60799	5.03331	6.47733	6.24686	6.58811	6.44196	noncoding	AK074767	lincRNA-ALDH1A2	lincRNA	2922	chr15	+	57998909	58074960	TTTCTACACTTACAGCTCATTGATTGTTCTTCTCATAGCATTAAAGTCTTCAGCATCTGG	exon sense-overlapping	NM_001018090	GCOM1	GRINL1A combined protein isoform 1	+	57884101	58009755	93.7426	4.83698	6.43857
ASHG19A3L0000823	7.78481e-05	3.03477	down	25.953	20.0217	28.0583	103.833	90.0228	80.4545	100.66	4.86964	4.60799	5.03331	6.47733	6.24686	6.58811	6.44196	noncoding	AK074767	lincRNA-ALDH1A2	lincRNA	2922	chr15	+	57998909	58074960	TTTCTACACTTACAGCTCATTGATTGTTCTTCTCATAGCATTAAAGTCTTCAGCATCTGG	exon sense-overlapping	NM_001018102	GRINL1A	protein GRINL1A isoform 2	+	57998900	58009753	93.7426	4.83698	6.43857
ASHG19A3L0000823	7.78481e-05	3.03477	down	25.953	20.0217	28.0583	103.833	90.0228	80.4545	100.66	4.86964	4.60799	5.03331	6.47733	6.24686	6.58811	6.44196	noncoding	AK074767	lincRNA-ALDH1A2	lincRNA	2922	chr15	+	57998909	58074960	TTTCTACACTTACAGCTCATTGATTGTTCTTCTCATAGCATTAAAGTCTTCAGCATCTGG	intron sense-overlapping	NM_001018091	GCOM1	GRINL1A combined protein isoform 2	+	57884101	58009755	93.7426	4.83698	6.43857
ASHG19A3L0000823	7.78481e-05	3.03477	down	25.953	20.0217	28.0583	103.833	90.0228	80.4545	100.66	4.86964	4.60799	5.03331	6.47733	6.24686	6.58811	6.44196	noncoding	AK074767	lincRNA-ALDH1A2	lincRNA	2922	chr15	+	57998909	58074960	TTTCTACACTTACAGCTCATTGATTGTTCTTCTCATAGCATTAAAGTCTTCAGCATCTGG	exon sense-overlapping	NM_015532	GRINL1A	protein GRINL1A isoform 1	+	57998900	58009753	93.7426	4.83698	6.43857
ASHG19A3A000081	0.0031196	2.5727	down	1685.68	2197.18	1743.44	4223.86	3994.01	3524.36	4662.59	10.5657	10.9624	10.6868	12.2344	11.8943	12.1601	12.1176	noncoding	ENST00000400430	RP11-350A18.1	Ensembl	702	chr13	-	41025130	41055143	TGGAATCTTCCTCCTCCTCACTTCTCTGCCTTAAGGGCTCTGCCTGCCACAATTCATGAG	intergenic							4101.21	10.7383	12.1016
ASHG19A3L0003290	0.0353413	2.33761	down	69.271	64.444	59.8877	85.683	208.853	223.823	228.175	6.24555	6.14833	6.07723	7.7227	7.78654	6.30688	7.71216	noncoding	DR423683	lincRNA-DLG1	lincRNA	732	chr3	-	197090054	197090786	CCTCGCAGATGCCCGATTTCCTTCTCTACAAGACCAATCTTTCCCAGACTGGTCCTTGGA	intergenic							186.633	6.15703	7.38207
ASHG19A3A000190	0.000246097	4.57706	down	18.187	15.164	12.8656	89.1358	88.8282	87.0223	94.5968	4.3502	4.26329	3.95723	6.38523	6.36139	6.36953	6.42249	noncoding	ENST00000428474	AC104820.2	Ensembl	511	chr2	+	181988622	182227638	tgatcaagttatttcatctgaaaaattgagttgactgcaggtaactgaaactgcggaaag	intergenic							89.8958	4.19024	6.38466
ASHG19A3A046598	0.000526819	2.53549	down	15.0523	12.6276	14.6834	42.0797	48.5546	45.4779	54.5063	4.08241	4.04458	4.13624	5.56553	5.40259	5.23109	5.52081	noncoding	ENST00000421455	RP4-668G5.1	Ensembl	768	chr1	-	61419725	61436417	CTGTGCTGTGTATTGCACACATCTCAAACCTTGTGACAAATGTGTAAGATATTTTTTATG	intergenic							47.6546	4.08774	5.43001
ASHG19A3L0000917	2.75502e-05	3.90757	down	5	5.20652	5	24.1983	21.2154	23.3476	23.1124	2.37766	2.33027	2.39437	4.25697	4.39866	4.39502	4.28416	noncoding	AI124884	lincRNA-CRHR1-2	lincRNA	394	chr17	+	43657442	43657836	CTCAGAAGTCTCACATAAGACTGAGACTGAAACACAAGAACCATTCTGTTTTACATACAA	intergenic							22.9684	2.36743	4.3337
ASHG19A3A033329	0.00417453	3.89344	down	7.10739	15.3586	18.2484	74.9524	68.5733	60.2724	55.7812	3.0764	4.27786	4.43701	5.6002	5.81985	6.10299	6.04285	noncoding	ENST00000450686	RP11-325F22.3	Ensembl	538	chr7	-	104590761	104653491	CTCCAGCCAAAGAAAATAATTCAGGTATCAAGTTGGACTAGCTCAGATGACTACAAAATG	intergenic							64.8948	3.93043	5.89147
ASHG19A3A009395	0.0112378	2.47295	down	60.8218	69.7942	48.7754	209.758	183.431	159.809	135.198	6.0528	6.25938	5.79651	6.93142	7.27927	7.64428	7.51488	noncoding	HIT000395572		H-invDB	354	chr1	-	200443206	200443559	ATTAAGTAGGAGGTTCAGGGCTAAGCTAATAACTCGCCTGCCTTTCTGACTGATCACAGT	intergenic							172.049	6.03623	7.34246
ASHG19A3A036123	0.00340386	4.30869	down	107.305	150.731	106.193	679.54	624.685	603.133	345.799	6.85203	7.30791	6.87067	8.35439	9.28778	9.4488	9.37883	noncoding	uc003yry.2	BX648371	UCSC_knowngene	5325	chr8	-	126953377	126963433	ACAATAATGATGCCATGACTTGGACAAAATGCCCATTGCCTCTGGGTCCTGCTTTCTTCA	intergenic							563.289	7.0102	9.11745
ASHG19A3A016749	1.09684e-05	3.03124	down	330.771	330.971	294.771	922.437	868.644	915.404	1036.23	8.38054	8.37133	8.25748	10.0369	9.91585	9.92325	9.86943	noncoding	ENST00000452381	AC064834.2	Ensembl	850	chr2	+	196397758	196403405	GGCATTTCTATCATTCTAGCACCACTAGCATTATCGCCTCTTCTCCCATTGACATATTTT	intergenic							935.679	8.33645	9.93636
ASHG19A3L0000637	0.00807459	2.2053	down	108.04	103.691	105.086	189.067	246.28	295.817	322.245	6.86184	6.80156	6.85601	8.24809	8.21478	7.49139	7.96885	noncoding	chr13:49123374-49135499+	lincRNA-CYSLTR2-2	lincRNA	12126	chr13	+	49123374	49135499	CTATCTGTACTATCTTTCTACAGCTGCAAAATTGTTCTCTCCACTGCACTTGTAGTAATG	intergenic							263.352	6.8398	7.98078
ASHG19A3A052657	9.7319e-06	3.09106	down	1540.51	1623.82	1489.32	3900.06	3952.23	4132.22	4387.83	10.4456	10.5232	10.4631	12.148	12.1314	12.0401	12.102	noncoding	uc010ayj.1	HBT8	UCSC_knowngene	4100	chr15	+	25277533	25281633	AATCCAACAACTTTAGCAGTTTGTTTACCAGTTATTGAGTACCAACTGTGTTCAACATTG	intergenic							4093.09	10.4773	12.1054
ASHG19A3L0000368	0.00151181	2.92603	down	27.2571	31.2614	27.6407	112.791	92.7024	88.7912	122.334	4.93602	5.18271	5.01249	6.7821	6.39161	6.708	6.48905	noncoding	AK226157	lincRNA-EHF	lincRNA	4584	chr11	-	34874640	34912288	TATAGCCTATGTACCTGGAAATGTGGCAGTTGCTTGACTTTATTTTAAAAAATACATCCC	exon sense-overlapping	NM_015957	APIP	probable methylthioribulose-1-phosphate	-	34903842	34937939	104.155	5.04374	6.59269
ASHG19A3L0002705	0.00291443	9.96079	down	6.07039	8.40174	5	96.5055	93.5124	74.6584	71.8815	2.90345	3.58164	2.39437	5.97632	6.14075	6.48365	6.50359	noncoding	DA955413	lincRNA-FAM65A-1	lincRNA	562	chr16	+	67552113	67552675	AGATCTGGGACCTCTGAGTCTGGGAATTGGGCAGGGTGACAGAGTCAGGTGACTCAACCT	intergenic							84.1394	2.95982	6.27608
ASHG19A3A028394	0.000163418	25.4049	down	21.5129	19.4929	12.1552	519.106	474.729	474.801	566.457	4.58882	4.57481	3.87767	9.12195	8.92755	9.04848	8.95855	noncoding	ENST00000506596	ANKDD1B	Ensembl	1815	chr5	+	74907300	74967671	CAACTGCTATTTCTCTTTCAGTAAGAGAAACTGGGTTTGGAATTTATAGTCATTGTTGAC	intergenic							508.773	4.3471	9.01413
ASHG19A3L0001083	0.016182	2.10447	down	10.3337	6.95532	8.82077	30.2724	19.8201	18.9661	41.6947	3.56828	3.3851	3.44725	5.16349	4.07741	4.73793	4.18251	noncoding	AI767662	lincRNA-ZEB2-3	lincRNA	551	chr2	-	146007956	146008509	CTGGCTTGACTAGATAGTCCCAGCATTGCTTCTAATACCAATAGTAAATATACTATTAGT	intergenic							27.6883	3.46688	4.54034
ASHG19A3L0001405	0.00122054	4.23	down	5.65192	6.70738	6.04554	39.1259	31.889	38.0221	48.7792	2.82595	3.34897	2.99065	5.39585	5.13358	5.12371	4.89025	noncoding	CR737987	lincRNA-LRIG1	lincRNA	445	chr3	-	66831091	67022804	AATGAGAAGAAAGGTTGAATCATCAAAGATGACTATGGGGGCTTGCACTAAGAGTCTACA	intergenic							39.4541	3.05519	5.13585
ASHG19A3L0001904	0.000291453	2.24235	down	781.707	723.937	650.036	1456.29	1389.42	1487.4	1446.51	9.52399	9.42517	9.32628	10.5365	10.6375	10.6085	10.5782	noncoding	CB157495	lincRNA-NPVF-2	lincRNA	608	chr7	-	25988420	25989023	AATGGAGGAAGGCTCAATGAGGGAGAAAGTATTCAGCTGCTTGATGTTAGAGCTTAATGG	intergenic							1444.9	9.42515	10.5902
ASHG19A3L0002005	0.003146	2.84883	down	55.8563	34.6979	44.2143	171.296	162.289	133.398	135.019	5.93997	5.32307	5.66289	6.92895	7.0049	7.34123	7.33431	noncoding	AA528614	lincRNA-MYC-10	lincRNA	307	chr8	-	129306991	129307146	TCTTTCTTTTAGGACTTCACTTATAGCAAGCTCTTTCTTCCCAGACTTTGATAGTCGACG	intergenic							150.501	5.64198	7.15235
ASHG19A3A028623	0.0185231	5.26486	down	5	16.3703	5	32.9514	39.199	48.9665	82.3994	2.37766	4.35829	2.39437	6.184	5.5121	4.86248	5.20076	noncoding	ENST00000514243	RP11-159K7.1	Ensembl	533	chr5	+	111882669	111883202	TTATGATGCAGCTGTCATGAAGTCTGGATGGGTCTAGAAAGCCATTGCCCATGCTGTTTA	intergenic							50.8791	3.04344	5.43983
ASHG19A3A032077	0.00145148	8.75878	down	9.85392	5.31498	8.38645	73.9243	83.3911	76.537	84.5369	3.50495	2.33452	3.37913	6.22293	6.17447	6.08391	6.33307	noncoding	ENST00000443303	RP3-523C21.1	Ensembl	569	chr6	+	132455550	132490514	TCTGTCTGATGAGGAGAATAAGAGCCAGTTTGTGGTATTGACAGAAGAATGAAAGTAAAG	intergenic							79.5973	3.07287	6.20359
ASHG19A3A007141	1.00424e-06	3.10736	down	338.221	329.589	334.807	1018.72	961.437	973.398	1045.2	8.40977	8.36565	8.43588	10.0498	10.0148	10.0652	10.028	noncoding	NR_003500	RP9P	RefSeq_NR	1405	chr7	-	32956427	32982782	tttgagaggccgcggtggacagatcacgagTTATGAAAAACCTCCTCCTGGGCTTATCAA	intergenic							999.689	8.40377	10.0395
ASHG19A3L0000894	0.000794334	2.08966	down	41.7089	43.0457	42.2084	115.08	90.0485	106.457	117.308	5.52527	5.6087	5.59611	6.71588	6.66594	6.73535	6.44268	noncoding	CF129145	lincRNA-LOC100506581-1	lincRNA	521	chr16	+	86616548	86617070	CTTCATGGTGGCTGGAGTCTTGTTTCCATGAAATAAAGGTTGTTTCATAGAATGAAAAAC	intergenic							107.223	5.57669	6.63996
ASHG19A3L0000351	0.00314867	3.47584	down	5	5.31908	5.78858	28.6371	18.6792	22.2478	24.1901	2.37766	2.33468	2.94802	4.32666	4.3259	4.6558	4.0949	noncoding	CF139581	lincRNA-LUZP2-1	lincRNA	486	chr11	+	23188097	23224707	GTATGCAGAGAAGGGACTGAATGAATATGCCCAAAGATGTGTAACACTCATTGTCTCTGG	intergenic							23.4385	2.55345	4.35081
ASHG19A3L0001836	0.0219702	2.18386	down	22.9076	23.5794	15.4601	75.138	48.269	44.1254	64.376	4.68609	4.81286	4.21463	5.8168	5.35632	6.10645	5.51273	noncoding	chr6:91387079-91405854+	lincRNA-EPHA7-3	lincRNA	18776	chr6	+	91387079	91405854	TGGCAGCTTTCTGTGGAACACTTCTGACCCATGTAATCCTAGAAAACTCTACCATCCAGT	intergenic							57.9771	4.57119	5.69807
ASHG19A3A053957	3.88102e-05	2.18855	down	48.2762	44.841	47.2615	120.116	118.052	117.173	134.35	5.73318	5.66428	5.75132	6.92115	6.80872	6.80328	6.8518	noncoding	BX648197		misc_RNA	5122	chr16	-	75620136	75625237	TTCTTCAGCTTACCCAGTGCCACTGTGAATGTCCTTCTTTACTAACATGTCAGTAACTGC	intergenic							122.423	5.71626	6.84624
ASHG19A3L0003471	0.00721604	2.35378	down	5.47157	5	6.00388	15.3506	18.19	15.7147	22.6761	2.79165	2.32192	2.98327	4.22366	3.77805	3.68823	4.04576	noncoding	chr2:118805569-118808550+	lincRNA-INSIG2-5	lincRNA	2982	chr2	+	118805569	118808550	AATATTCCCCATGACTGGGAGTTGACATTGTTTCCTTGAAGATATTTTTAAGGAGATGTT	intergenic							17.9829	2.69894	3.93392
ASHG19A3A020886	4.36784e-06	5.0799	down	73.6194	66.6418	62.9067	353.577	372.432	365.981	441.979	6.33497	6.19507	6.14603	8.73032	8.51971	8.45205	8.57854	noncoding	uc003che.2	BC040563	UCSC_knowngene	3263	chr3	-	37847343	37903250	CAGGAAGGAGTTGGAGTTGGAGAAAAAGGAGAATTAAGAATCTATCTGGCGATGTGGATT	bidirectional	NM_001008392	CTDSPL	CTD small phosphatase-like protein isoform 1	+	37903668	38025960	383.492	6.22535	8.57016
ASHG19A3A020886	4.36784e-06	5.0799	down	73.6194	66.6418	62.9067	353.577	372.432	365.981	441.979	6.33497	6.19507	6.14603	8.73032	8.51971	8.45205	8.57854	noncoding	uc003che.2	BC040563	UCSC_knowngene	3263	chr3	-	37847343	37903250	CAGGAAGGAGTTGGAGTTGGAGAAAAAGGAGAATTAAGAATCTATCTGGCGATGTGGATT	bidirectional	NM_005808	CTDSPL	CTD small phosphatase-like protein isoform 2	+	37903668	38025960	383.492	6.22535	8.57016
ASHG19A3A020886	4.36784e-06	5.0799	down	73.6194	66.6418	62.9067	353.577	372.432	365.981	441.979	6.33497	6.19507	6.14603	8.73032	8.51971	8.45205	8.57854	noncoding	uc003che.2	BC040563	UCSC_knowngene	3263	chr3	-	37847343	37903250	CAGGAAGGAGTTGGAGTTGGAGAAAAAGGAGAATTAAGAATCTATCTGGCGATGTGGATT	intronic antisense	NM_002207	ITGA9	integrin alpha-9 precursor	+	37493812	37861281	383.492	6.22535	8.57016
ASHG19A3A036409	0.00455399	2.78671	down	5	7.12476	5	22.2817	20.3287	23.39	18.9564	2.37766	3.41234	2.39437	3.93911	4.4013	4.26609	4.22024	noncoding	AK058067		misc_RNA	1644	chr8	+	20831496	20852630	ATACACATCTCATTGAGTAAGGAAGGAAGCTGCCTGTGACTGAGACTCTGAAATGGACCA	intergenic							21.2392	2.72812	4.20668
ASHG19A3A028610	9.97617e-06	100.168	down	5.83874	5	5	516.35	554.683	571.542	618.118	2.8614	2.32192	2.39437	9.24571	9.21112	9.03887	9.19299	noncoding	ENST00000448680	RP4-666F24.3	Ensembl	491	chr1	+	115642292	115645279	TTATACCTGCTTGTGGGGACATGAGTGAAGAAAGAGAGGGGACTTTGAAACAAGAGAAGA	intergenic							565.173	2.52589	9.17217
ASHG19A3L0002174	0.0292937	2.31989	down	35.5342	37.1479	18.378	90.7934	89.597	77.2879	75.842	5.30856	5.4138	4.44833	6.06155	6.18995	6.39742	6.43491	noncoding	BU570390	lincRNA-GDF6-2	lincRNA	413	chr8	+	96281062	96822373	ACAATGACACAAAAACCTTTCAAAGGCATCATGGTCCTAAAGGGCTTTCCCCAAGGGACA	intronic antisense	NM_177965	C8orf37	hypothetical protein LOC157657	-	96257140	96281462	83.3801	5.0569	6.27096
ASHG19A3A026985	3.26147e-05	2.01736	down	402.158	359.819	350.774	746.51	676.204	682.691	803.837	8.64274	8.48859	8.49658	9.64391	9.47829	9.59529	9.50293	noncoding	AK022073		misc_RNA	1873	chr5	-	77293797	77295669	CCTGTGCCTTTGCAGGTTCTAAAATGATTCTTTTCAGACTTAGAGTCAAAGTAGCTAAAG	intergenic							727.311	8.54264	9.5551
ASHG19A3A050863	0.000902359	2.47375	down	67.4209	54.4626	54.0377	172.258	153.445	178.659	169.422	6.20816	5.92006	5.93425	7.26801	7.4447	7.3489	7.24849	noncoding	uc001ejn.1	BC070106	UCSC_knowngene	1888	chr1	-	143424332	143467651	GGATCCCAGCGGTGGTCGTGTAGCTGAGCAGGCCTGGGGCTTGGTTCTATGTCCCTGTGG	intergenic							168.446	6.02083	7.32753
ASHG19A3L0002620	0.000710049	10.3103	down	162.131	289.108	196.341	2611.26	2610.82	2428.4	1186.1	7.41602	8.18231	7.70615	10.238	11.3554	11.4554	11.488	noncoding	DB340468	lincRNA-KLF13-2	lincRNA	578	chr15	+	31598146	31598723	ACTTTGGGGTGATGTCCTCCAGCCTCTGCATCTTTCCTGGGTCAGACTGGGAGTTCTGAG	intergenic							2209.15	7.76816	11.1342
ASHG19A3L0001563	0.00108502	2.24913	down	257.36	225.833	285.332	608.807	522.113	541.207	638.808	8.0344	7.85514	8.21353	9.29947	9.12458	9.28079	9.11006	noncoding	chr5:100383976-100436626-	lincRNA-ST8SIA4-2	lincRNA	52651	chr5	-	100383976	100436626	GTAATTTTTTCCTCTTCTGCCTGGCCTTACATGGTTGGAGCATTTGGCAAAAGGTTATAC	intergenic							577.734	8.03436	9.20372
ASHG19A3A024392	0.000115767	2.07213	down	590.105	551.28	560.739	1060.1	1055.44	1105.09	1102	9.14967	9.05188	9.11902	10.1299	10.2122	10.1318	10.1579	noncoding	ENST00000502331	OR7E94P	Ensembl	364	chr4	-	80508914	80509278	ATGCAATCGCATAGCAGAGTCATCTCTTATGCGGGCTGCCTGACATAGATGTCTTTCTTT	intergenic							1080.66	9.10686	10.158
ASHG19A3A025994	3.83635e-05	6.68986	down	128.167	141.943	143.34	949.086	879.047	904.301	1023.28	7.09222	7.23049	7.28235	10.0195	9.8966	9.96939	9.88912	noncoding	NR_027105	LOC285419	RefSeq_NR	566	chr4	+	124573939	124851518	AAGACCCAAATCGGAGCTTCATCCCTGCATGGTTCATTTTGCTTATTTGGCAAACTTGCC	intergenic							938.929	7.20168	9.94366
ASHG19A3A030227	0.000312672	2.37971	down	2372.47	2636.94	2676.73	5202.47	4798.01	5191.71	5387.12	11.0639	11.2144	11.2955	12.4492	12.4653	12.4786	12.3751	noncoding	uc003plc.3	SNHG5	UCSC_knowngene	1078	chr6	-	86386725	86388440	TGGAAAAACGCCTTGGAGTGTGACATTTCTGCGAGAATGCTTAAATACCGATTTCCCGCA	intergenic							5144.83	11.1913	12.4421
ASHG19A3L0000734	0.0107729	5.63083	down	5	5.63127	5	26.2958	25.6604	28.7081	84.549	2.37766	2.76308	2.39437	6.22326	4.71167	4.52523	4.56003	noncoding	AW993564	lincRNA-MAPK1IP1L-1	lincRNA	503	chr14	-	55509240	55739892	AGACCAGTGAATTATTTGTAGAAGACAGACACAAATCTATGAGCTGGTATTTGAGAACTA	intronic antisense	NM_080867	SOCS4	suppressor of cytokine signaling 4	+	55493843	55516206	41.3033	2.5117	5.00505
ASHG19A3L0000734	0.0107729	5.63083	down	5	5.63127	5	26.2958	25.6604	28.7081	84.549	2.37766	2.76308	2.39437	6.22326	4.71167	4.52523	4.56003	noncoding	AW993564	lincRNA-MAPK1IP1L-1	lincRNA	503	chr14	-	55509240	55739892	AGACCAGTGAATTATTTGTAGAAGACAGACACAAATCTATGAGCTGGTATTTGAGAACTA	intronic antisense	NM_002306	LGALS3	galectin-3 isoform 1	+	55595934	55612148	41.3033	2.5117	5.00505
ASHG19A3L0000734	0.0107729	5.63083	down	5	5.63127	5	26.2958	25.6604	28.7081	84.549	2.37766	2.76308	2.39437	6.22326	4.71167	4.52523	4.56003	noncoding	AW993564	lincRNA-MAPK1IP1L-1	lincRNA	503	chr14	-	55509240	55739892	AGACCAGTGAATTATTTGTAGAAGACAGACACAAATCTATGAGCTGGTATTTGAGAACTA	intronic antisense	NM_199421	SOCS4	suppressor of cytokine signaling 4	+	55493843	55516206	41.3033	2.5117	5.00505
ASHG19A3L0000734	0.0107729	5.63083	down	5	5.63127	5	26.2958	25.6604	28.7081	84.549	2.37766	2.76308	2.39437	6.22326	4.71167	4.52523	4.56003	noncoding	AW993564	lincRNA-MAPK1IP1L-1	lincRNA	503	chr14	-	55509240	55739892	AGACCAGTGAATTATTTGTAGAAGACAGACACAAATCTATGAGCTGGTATTTGAGAACTA	intronic antisense	NM_152231	FBXO34	protein CGI-301	+	55738871	55819801	41.3033	2.5117	5.00505
ASHG19A3L0000734	0.0107729	5.63083	down	5	5.63127	5	26.2958	25.6604	28.7081	84.549	2.37766	2.76308	2.39437	6.22326	4.71167	4.52523	4.56003	noncoding	AW993564	lincRNA-MAPK1IP1L-1	lincRNA	503	chr14	-	55509240	55739892	AGACCAGTGAATTATTTGTAGAAGACAGACACAAATCTATGAGCTGGTATTTGAGAACTA	intronic antisense	NM_017943	FBXO34	protein CGI-301	+	55738020	55820329	41.3033	2.5117	5.00505
ASHG19A3L0000734	0.0107729	5.63083	down	5	5.63127	5	26.2958	25.6604	28.7081	84.549	2.37766	2.76308	2.39437	6.22326	4.71167	4.52523	4.56003	noncoding	AW993564	lincRNA-MAPK1IP1L-1	lincRNA	503	chr14	-	55509240	55739892	AGACCAGTGAATTATTTGTAGAAGACAGACACAAATCTATGAGCTGGTATTTGAGAACTA	intron sense-overlapping	NM_014750	DLGAP5	disks large-associated protein 5 isoform a	-	55614833	55658396	41.3033	2.5117	5.00505
ASHG19A3L0000734	0.0107729	5.63083	down	5	5.63127	5	26.2958	25.6604	28.7081	84.549	2.37766	2.76308	2.39437	6.22326	4.71167	4.52523	4.56003	noncoding	AW993564	lincRNA-MAPK1IP1L-1	lincRNA	503	chr14	-	55509240	55739892	AGACCAGTGAATTATTTGTAGAAGACAGACACAAATCTATGAGCTGGTATTTGAGAACTA	intron sense-overlapping	NM_001146015	DLGAP5	disks large-associated protein 5 isoform b	-	55614833	55658396	41.3033	2.5117	5.00505
ASHG19A3L0000734	0.0107729	5.63083	down	5	5.63127	5	26.2958	25.6604	28.7081	84.549	2.37766	2.76308	2.39437	6.22326	4.71167	4.52523	4.56003	noncoding	AW993564	lincRNA-MAPK1IP1L-1	lincRNA	503	chr14	-	55509240	55739892	AGACCAGTGAATTATTTGTAGAAGACAGACACAAATCTATGAGCTGGTATTTGAGAACTA	intronic antisense	NM_001177388	LGALS3	galectin-3 isoform 2	+	55595934	55612148	41.3033	2.5117	5.00505
ASHG19A3L0000734	0.0107729	5.63083	down	5	5.63127	5	26.2958	25.6604	28.7081	84.549	2.37766	2.76308	2.39437	6.22326	4.71167	4.52523	4.56003	noncoding	AW993564	lincRNA-MAPK1IP1L-1	lincRNA	503	chr14	-	55509240	55739892	AGACCAGTGAATTATTTGTAGAAGACAGACACAAATCTATGAGCTGGTATTTGAGAACTA	intronic antisense	NM_144578	MAPK1IP1L	MAPK-interacting and spindle-stabilizing	+	55518361	55536912	41.3033	2.5117	5.00505
ASHG19A3A010465	0.00882979	2.03681	down	23.7077	29.1506	22.8139	78.4294	66.4701	63.9913	50.273	4.7354	5.08942	4.74113	5.44183	5.91339	6.17432	5.99697	noncoding	ENST00000416112	AP001793.1	Ensembl	1595	chr18	+	8459155	8513727	TTACATCAATTCCTTAAACCAGAACTCCTTGCCTGGATAAGTGGAGGTGACCAGGGGAAA	intergenic							64.7909	4.85532	5.88163
ASHG19A3L0003027	0.00229194	2.17358	down	7.56857	5	6.05146	18.1868	17.2834	15.2484	20.9926	3.13991	2.32192	2.99175	4.10013	3.72966	3.95651	3.96542	noncoding	chr14:65072296-65092272+	lincRNA-PLEKHG3	lincRNA	19977	chr14	+	65072296	65092272	AACAGGCTGCTCTGTTTGTCTTGTAGGTAGGGGCAGAAAGGCAAATAGAAGGAAAGAATC	intergenic							17.9278	2.81786	3.93793
ASHG19A3A030827	0.00286775	3.81682	down	30.3138	23.4411	35.4597	136.563	111.844	146.163	155.316	5.08178	4.80528	5.35344	7.14436	7.14121	6.99304	6.77154	noncoding	uc003qvy.1	AL832737	UCSC_knowngene	3867	chr6	-	168080305	168096970	TTTTAGATTTCAGCTACAGAAGGCAGGAATCCTTTGGACTTGGCCCTTTATCAGTGGAAT	intergenic							137.472	5.08017	7.01254
ASHG19A3L0001155	0.00762354	2.28468	down	39.2393	37.8396	26.957	101.692	101.317	87.4643	93.383	5.44134	5.43771	4.97991	6.36581	6.36844	6.55867	6.62032	noncoding	chr2:232219356-232231081-	lincRNA-ARMC9	lincRNA	11726	chr2	-	232219356	232231081	CTCATGCCTGCCTAGGGCTGGACCCTGCAAATGGTTGTTTTTGAATGTCAATTTCATATG	intergenic							95.964	5.28632	6.47831
ASHG19A3L0000505	4.00401e-06	2.35548	down	702.721	643.567	652.584	1433.54	1348.51	1367.6	1524.8	9.38455	9.26085	9.33169	10.6095	10.5227	10.5867	10.5279	noncoding	BC002759	lincRNA-SLC48A1	lincRNA	1041	chr12	+	48165369	48176533	TTCTGGGGGGCCCTTTCAGAGGCACTTTTAAAGCAAATAAAACATTTATTGTTCAAAAAA	natural antisense	NM_015401	HDAC7	histone deacetylase 7 isoform a	-	48176506	48213763	1418.61	9.3257	10.5617
ASHG19A3L0000505	4.00401e-06	2.35548	down	702.721	643.567	652.584	1433.54	1348.51	1367.6	1524.8	9.38455	9.26085	9.33169	10.6095	10.5227	10.5867	10.5279	noncoding	BC002759	lincRNA-SLC48A1	lincRNA	1041	chr12	+	48165369	48176533	TTCTGGGGGGCCCTTTCAGAGGCACTTTTAAAGCAAATAAAACATTTATTGTTCAAAAAA	exon sense-overlapping	NM_017842	SLC48A1	heme transporter HRG1	+	48166966	48176536	1418.61	9.3257	10.5617
ASHG19A3L0000505	4.00401e-06	2.35548	down	702.721	643.567	652.584	1433.54	1348.51	1367.6	1524.8	9.38455	9.26085	9.33169	10.6095	10.5227	10.5867	10.5279	noncoding	BC002759	lincRNA-SLC48A1	lincRNA	1041	chr12	+	48165369	48176533	TTCTGGGGGGCCCTTTCAGAGGCACTTTTAAAGCAAATAAAACATTTATTGTTCAAAAAA	natural antisense	NM_001098416	HDAC7	histone deacetylase 7 isoform d	-	48176506	48213763	1418.61	9.3257	10.5617
ASHG19A3L0003498	0.00018164	2.2201	down	140.356	137.657	126.806	344.101	289.214	305.22	359.357	7.21617	7.18787	7.11141	8.40977	8.26118	8.40844	8.21039	noncoding	CK905913	lincRNA-TTC17-2	lincRNA	587	chr11	-	43606137	43694943	TTCTAAGTTTATTCATCCAAGCTCTTCATCACCTGTGGCCTTTGAGAACTCCTCCTTCAG	intergenic							324.473	7.17182	8.32244
ASHG19A3L0002660	0.00373072	2.50315	down	29.957	44.3114	37.667	105.181	105.605	109.484	127.684	5.06756	5.64666	5.44123	6.84023	6.70528	6.60815	6.68193	noncoding	chr8:16980864-16988341-	lincRNA-EFHA2-1	lincRNA	7478	chr8	-	16980864	16988341	CCCCCATGCTCAATACTATACATTATATAACTATCCTTTCAATGTGCAAGGTGAAAAGAT	intergenic							111.988	5.38515	6.7089
ASHG19A3A049546	0.00011773	7.19713	down	29.0362	30.4357	23.5469	251.107	222.385	230.692	233.907	5.02327	5.14555	4.78449	7.76373	7.83269	7.92488	7.80613	noncoding	uc001vca.2	BC039553	UCSC_knowngene	1141	chr13	-	48870650	48877797	CCTCTTTTTTGTTTTCTTAATGGCTTGATGAGCCACACATGTTTCTCTAAATGCATGATT	bidirectional	NM_000321	RB1	retinoblastoma-associated protein	+	48877882	49056026	234.523	4.98444	7.83186
ASHG19A3L0000891	0.00611502	2.18898	down	12.159	14.5968	10.752	33.6169	35.5643	33.1106	44.7759	3.78284	4.21729	3.7164	5.27127	4.92357	4.8933	5.05495	noncoding	chr16:86071999-86088974-	lincRNA-IRF8	lincRNA	16976	chr16	-	86071999	86088974	CAGCCTCGGAGTTCTAGGTGGTTTCCATGGCTTGGAACTTATAACCTCATTTTCTTTTTT	intergenic							36.767	3.90551	5.03577
ASHG19A3L0003355	3.33757e-05	8.67803	down	110.483	122.961	95.6311	999.568	842.225	965.909	1114.6	6.88884	7.0342	6.72661	10.1434	10.0014	10.0375	9.82004	noncoding	BG219312	lincRNA-SOCS5-1	lincRNA	371	chr2	+	46908201	46908884	TTTCCTGGAGTGTGCAAGCTTTGCTTAGGCTTAGTTTTAATAAATAATAAGGAGACACAA	intergenic							980.576	6.88322	10.0006
ASHG19A3A032935	9.66842e-06	16.4129	down	5	5.2046	5	105.793	83.0867	82.7495	94.5941	2.37766	2.33019	2.39437	6.38512	6.28557	6.61692	6.32905	noncoding	ENST00000509603	AC104073.1	Ensembl	2001	chr7	-	64600748	65235797	GTGTTAACGACCACACATTTTACACAAATGCCATGAATCCTTAAGGTGTTCCAATTTATA	intronic antisense	NM_007139	ZNF92	zinc finger protein 92 isoform 1	+	64838767	64865998	91.5558	2.36741	6.40417
ASHG19A3A032935	9.66842e-06	16.4129	down	5	5.2046	5	105.793	83.0867	82.7495	94.5941	2.37766	2.33019	2.39437	6.38512	6.28557	6.61692	6.32905	noncoding	ENST00000509603	AC104073.1	Ensembl	2001	chr7	-	64600748	65235797	GTGTTAACGACCACACATTTTACACAAATGCCATGAATCCTTAAGGTGTTCCAATTTATA	intronic antisense	NM_152626	ZNF92	zinc finger protein 92 isoform 2	+	64838767	64865998	91.5558	2.36741	6.40417
ASHG19A3L0001858	6.22777e-05	3.29701	down	13.5846	13.078	12.8118	61.527	54.9727	54.9401	57.7882	3.94005	4.08548	3.95266	5.65406	5.68409	5.80532	5.71208	noncoding	BC075797	lincRNA-SCIN	lincRNA	6925	chr7	+	12596186	12616811	ACACTGGTTCTTAGGAATTGTTTTGACCTTAGTGAAGTTACCTGGATGTGATGTGTATTA	exon sense-overlapping	NM_001112706	SCIN	adseverin isoform 1	+	12610202	12693228	57.307	3.99273	5.71389
ASHG19A3A007443	0.000200544	5.95672	down	31.9567	26.4675	34.8043	207.119	206.593	209.232	252.946	5.15605	4.96301	5.32626	7.88761	7.6834	7.62502	7.6958	noncoding	NR_026936	C5orf27	RefSeq_NR	1931	chr5	+	95187935	95195834	GCTGGCACCCAGCTCTGCTTCACATGATCAAACTGCATCACGGAAGCTGCACACGATGAC	intergenic							218.973	5.14844	7.72296
ASHG19A3L0002321	0.00191483	4.19852	down	6.28381	5.21032	5	31.0234	28.737	25.5531	26.2764	2.94187	2.33042	2.39437	4.45192	4.53628	4.77431	4.73922	noncoding	chrX:57896050-57926300+	lincRNA-ZXDA-3	lincRNA	30251	chrX	+	57896050	57926300	CCTCACAACTAACAATCTATAGGTTGGTATCTGGAAGCTTATTGAATTGAATAATCCAAC	intergenic							27.8975	2.55555	4.62543
ASHG19A3A027054	0.00612424	2.78828	down	7.42099	9.37827	6.98154	24.3481	34.1294	29.5212	39.3527	3.12077	3.70067	3.15572	5.07096	4.75433	4.40358	4.99152	noncoding	AK022427		NRED	2554	chr5	-	82323780	82326924	GATGAGATTCCCATGCTTACTCTGAAATCATCATTTTGGAATCAGTCATTAAAGCTTCGT	intergenic							31.8378	3.32572	4.8051
ASHG19A3A023728	0.0335484	2.8997	down	27.5571	69.2593	25.7211	175.027	141.886	112.954	93.7432	4.95003	6.24734	4.91298	6.37221	6.7492	7.37269	7.12999	noncoding	ENST00000447462	RP11-528A4.3	Ensembl	323	chr3	+	193483469	193483792	CCATGCTCTAGTCAATAACCCTCAGTTAATCTGCTTCCAGCCAGCTATGAAGATGAATAA	intergenic							130.902	5.37012	6.90602
ASHG19A3A046559	0.000428231	3.51908	down	5.62023	5.24818	5	24.1748	17.0418	22.4895	29.5861	2.81876	2.33191	2.39437	4.63915	4.34374	4.39234	3.9456	noncoding	ENST00000444862	AP005273.1	Ensembl	522	chr11	+	64268324	64272858	TGTGAGCCCTTTGAAGACCTGATGGAAGCTATTGGACAGTAGAAGACACAGAGTGTACAT	intergenic							23.3231	2.51501	4.33021
ASHG19A3L0002527	0.00426369	2.57351	down	69.954	53.2865	64.9045	267.315	161.215	154.128	177.405	6.2609	5.89092	6.18666	7.34081	7.22243	8.01825	7.32477	noncoding	chr7:73684091-73687309-	lincRNA-RFC2	lincRNA	3219	chr7	-	73684091	73687309	TCAGGGGATATTGATTGCTTAACCTTCCCGGTGCATTCCATTTTCCCAATCATTGAGGTC	intergenic							190.016	6.11283	7.47656
ASHG19A3A016247	0.00338787	2.96963	down	17.4427	14.0205	10.2503	54.7924	53.2662	52.5549	52.5381	4.28601	4.16774	3.64958	5.51094	5.61822	5.62976	5.65998	noncoding	uc002tkz.1	CR601322	UCSC_knowngene	844	chr2	+	114737145	114764879	AAGTTTTCAACTGCAGATACAAACATCAGGACGTCAATGTATCTGCTAGGAGACACCCGG	intergenic							53.2879	4.03444	5.60473
ASHG19A3A054674	0.000252048	4.37629	down	19.7753	16.2343	15.7022	101.093	100.161	84.5342	99.2062	4.47202	4.34587	4.23524	6.45601	6.31735	6.54806	6.60158	noncoding	uc002eoo.1	AK056683	UCSC_knowngene	2147	chr16	+	66442426	66446038	ATTTTGCAAAGCATAGGGAAGAGTGAAAGTCATCCGGGGCATTTGCAGACACAGCACTAA	intergenic							96.2484	4.35104	6.48075
ASHG19A3L0001638	1.48464e-05	3.08782	down	508.196	549.817	522.706	1592.4	1414.87	1458.94	1488.27	8.94901	9.04678	9.02237	10.5778	10.6165	10.7288	10.6074	noncoding	chr5:3223050-3239025-	lincRNA-C5orf38-2	lincRNA	15976	chr5	-	3223050	3239025	TGAAGTTACCTGATGATATATGGCTTTTCCCCCACCTGCATCTGACTCTAAGGTTGTTGC	intergenic							1488.62	9.00605	10.6326
ASHG19A3L0002837	2.56117e-05	6.52508	down	123.571	116.752	130.234	828.718	785.905	851.68	856.932	7.04365	6.96155	7.14891	9.74735	9.80462	9.76002	9.71746	noncoding	CK819477	lincRNA-APLN-2	lincRNA	356	chrX	-	128809864	128812318	GGGGACTGTTCCGTCAGAATGAGCAGCTTAAAAAATGTCGCCTGTGAGGTCTCAGCTCGT	intergenic							830.809	7.05137	9.75736
ASHG19A3A022335	0.00819376	3.04891	down	50.4146	66.4891	41.7992	201.207	174.184	139.672	234.423	5.79467	6.19121	5.58345	7.76685	7.07077	7.58149	7.43982	noncoding	ENST00000448265	AC139618.1	Ensembl	2329	chr3	+	18004063	18310408	CTTCCTTGATGACCCAGCTACTTTACATCTCTGGATGGAATCCTCCTCTTTGCTCTAATG	intergenic							187.372	5.85644	7.46473
ASHG19A3A027128	7.57216e-05	12.9653	down	12.8628	15.5985	14.5768	239.195	205.34	219.453	251.221	3.86698	4.29634	4.12525	7.87736	7.75648	7.84978	7.6875	noncoding	ENST00000411846	RP11-483I13.4	Ensembl	1570	chr1	+	108815564	108880475	ACTTGTGGTCAGTTAGCCAGTTTCTCTGTGAACCTTATTAGAACTCGCATGCAGGCTTCA	intergenic							228.802	4.09619	7.79278
ASHG19A3A050012	0.000944667	2.02727	down	153.958	139.562	154.074	346.757	278.169	313.596	365.209	7.34036	7.20638	7.3796	8.43723	8.29907	8.42044	8.15654	noncoding	uc010aav.2	BC132836	UCSC_knowngene	390	chr13	+	30512060	30524588	GTTGATGCTGAAATGTTTCCTTCCTCTACATATTCCATGATGCGTCCTGTGGGGTTATGC	intergenic							325.933	7.30878	8.32832
ASHG19A3L0003398	5.66868e-06	5.93691	down	178.624	187.32	169.469	1062.6	968.704	1039.19	1149.91	7.54305	7.60326	7.50539	10.1953	10.113	10.1357	10.0372	noncoding	AI218855	lincRNA-RPS14-2	lincRNA	269	chr5	-	149855120	149864849	GCTTGACTAAGAGAACAGGAATGGAGGCCAAAAGATCTACAAAATGCTCACACAGAGAAG	intergenic							1055.1	7.55056	10.1203
ASHG19A3L0001088	0.00186659	2.54124	down	61.4747	75.6849	66.0749	216.782	173.297	176.346	224.694	6.06872	6.36856	6.2092	7.69757	7.42367	7.69263	7.43023	noncoding	chr2:148345005-148356555+	lincRNA-ACVR2A-4	lincRNA	11551	chr2	+	148345005	148356555	TATAAAATGCCCTGAAATGTTGTGCTGCCATGGTGGGCCCTGGAAAAGTCTCAGGTTATT	intergenic							197.78	6.21549	7.56103
ASHG19A3L0001410	0.00226468	2.53491	down	23.0086	25.8069	18.4154	79.9501	63.9457	68.5722	71.4985	4.69373	4.92735	4.45115	5.96873	6.01606	6.20547	5.94046	noncoding	BJ997865	lincRNA-SUCLG2-1	lincRNA	540	chr3	+	67321285	67321825	CTAAGTAACCCGTTTTCAATAATTACCCCTGGGACACTCATGGCACTTTTTATTAGCCAT	intergenic							70.9916	4.69074	6.03268
ASHG19A3L0003277	0.00424038	2.3389	down	26.9176	30.112	34.7611	88.7047	78.1871	83.2816	102.978	4.91949	5.1312	5.32479	6.51472	6.29418	6.36033	6.23473	noncoding	BG900305	lincRNA-LPP-1	lincRNA	381	chr3	+	187467858	187468152	CTCTACTACCTAAGGCTAGAAGTGGAAAAACTTGATTTGCGTGTTGTGCCTGCATTTTTT	intergenic							88.2878	5.12516	6.35099
ASHG19A3L0002148	0.000340587	3.69087	down	13.2882	7.99293	12.1282	49.6555	59.5292	43.2709	71.9817	3.90986	3.53117	3.87492	5.97899	5.327	5.48467	5.8331	noncoding	DB298687	lincRNA-ERI1-2	lincRNA	507	chr8	-	8902238	8902745	TCTCTATCTGCACATTGAGGAAAAGGAGAACTCCACTGGGAAAATACCGTCTTGGAGACT	intergenic							56.1093	3.77198	5.65594
ASHG19A3L0001003	0.00075255	2.44122	down	85.4301	90.4436	88.1898	261.893	204.191	231.132	274.456	6.53915	6.61508	6.61792	8.01071	7.83618	7.98929	7.67711	noncoding	CB069168	lincRNA-GALR1-4	lincRNA	507	chr18	-	75008831	75009338	ACGCATTTTGTTACCTTCCTTTCCTGCTTGAAGTCCATGAAGTCTGACTTCCCACTATTC	intergenic							242.918	6.59072	7.87832
ASHG19A3A042372	0.00179598	7.97615	down	5	8.21367	5	61.0581	59.5593	58.6816	59.0253	2.37766	3.56013	2.39437	5.68474	5.78026	5.79328	5.83402	noncoding	ENST00000427165	RP11-499O7.5	Ensembl	609	chr10	-	5164278	5177418	TTTGACTTTGAGTTGACTCCAGAGGACATGAAAGCCATTGACAGCCTCAACGGAAATCTC	intergenic							59.5811	2.77738	5.77308
ASHG19A3A028496	0.00523396	2.33345	down	16.7462	17.5581	10.2953	42.0116	39.9069	41.1074	56.721	4.22953	4.44497	3.65607	5.62729	5.24855	5.22834	5.22642	noncoding	uc003kjn.1	AL050132	UCSC_knowngene	1754	chr5	+	88185151	88263096	GTGTACTCTTTATTACTCTGTTGGACCATGATGAGAGCAACTTATTGTATGGCTATTTAA	intronic antisense	NM_001131005	MEF2C	myocyte-specific enhancer factor 2C isoform 2	-	88014057	88199922	44.9367	4.11019	5.33265
ASHG19A3A028496	0.00523396	2.33345	down	16.7462	17.5581	10.2953	42.0116	39.9069	41.1074	56.721	4.22953	4.44497	3.65607	5.62729	5.24855	5.22834	5.22642	noncoding	uc003kjn.1	AL050132	UCSC_knowngene	1754	chr5	+	88185151	88263096	GTGTACTCTTTATTACTCTGTTGGACCATGATGAGAGCAACTTATTGTATGGCTATTTAA	intronic antisense	NM_001193347	MEF2C	myocyte-specific enhancer factor 2C isoform 3	-	88014057	88199922	44.9367	4.11019	5.33265
ASHG19A3L0003404	0.0292116	2.73308	down	10.7398	5.18584	5.4594	26.5315	19.2483	28.4022	22.4041	3.61876	2.32945	2.88403	4.20562	4.69576	4.53837	4.1387	noncoding	chr18:53870419-53881113-	lincRNA-TCF4-6	lincRNA	10695	chr18	-	53870419	53881113	CAGTTGGCTATGCTGAAGTAGATACATAAGTTAATGCTCTTACCTCTGTAGCAATATTCC	intergenic							24.1465	2.94408	4.39461
ASHG19A3A012611	0.00217909	2.26515	down	25.5775	17.8951	17.9539	67.4965	55.3624	50.0989	64.7133	4.84791	4.47039	4.41528	5.82271	5.54562	5.94046	5.72108	noncoding	uc010efh.1	ZNF568	UCSC_knowngene	1901	chr19	+	37464114	37471218	CGGTTATATGTGCTGTGCATGCTTTCTTACTTTAACCTTTAAATGATGGTAGATATTCTC	exon sense-overlapping	NM_001204838	ZNF568	zinc finger protein 568 isoform 5	+	37407230	37488834	59.4178	4.57786	5.75747
ASHG19A3A012611	0.00217909	2.26515	down	25.5775	17.8951	17.9539	67.4965	55.3624	50.0989	64.7133	4.84791	4.47039	4.41528	5.82271	5.54562	5.94046	5.72108	noncoding	uc010efh.1	ZNF568	UCSC_knowngene	1901	chr19	+	37464114	37471218	CGGTTATATGTGCTGTGCATGCTTTCTTACTTTAACCTTTAAATGATGGTAGATATTCTC	exon sense-overlapping	NM_001204839	ZNF568	zinc finger protein 568 isoform 6	+	37407230	37488834	59.4178	4.57786	5.75747
ASHG19A3A021807	6.12918e-05	3.70919	down	76.0498	76.9433	68.0874	326.843	279.388	290.473	323.148	6.38181	6.38896	6.25321	8.25231	8.18832	8.32639	8.16271	noncoding	uc003fah.1	BC015836	UCSC_knowngene	777	chr3	-	155008020	155011471	TCCTGATTGGCTGGATTGTGGGCTGCATCATAATGATTTATGTTGTCTTCTCTTAGAAAG	intergenic							304.963	6.34133	8.23243
ASHG19A3L0000888	0.0275671	2.28714	down	29.6039	55.7291	25.9961	108.824	83.8814	83.7673	117.399	5.0506	5.95392	4.92887	6.71677	6.30434	6.65739	6.34017	noncoding	chr16:84296674-84307824+	lincRNA-WFDC1	lincRNA	11151	chr16	+	84296674	84307824	TGTTTTGCCATCCATTAACCCTTTAATCCATTAATCAATTTTCCTTCCATCCACCAGTTT	intergenic							98.4679	5.31113	6.50467
ASHG19A3L0001982	0.0221437	3.50467	down	27.9535	70.2683	29.8627	192.21	144.577	124.222	193.515	4.96772	6.2678	5.12061	7.47544	6.89686	7.5156	7.1574	noncoding	BU624419	lincRNA-HAS2-3	lincRNA	656	chr8	+	122152288	122157412	ATTCTTGTTCTGTTCTTCCTACTGATACTTCTGGTCTCTGTATCTGGTTCTGGTTAGTCT	intergenic							163.631	5.45204	7.26132
ASHG19A3L0000650	0.0089321	2.05612	down	41.3071	40.1291	25.5919	74.2315	97.397	86.4203	95.3433	5.51067	5.51426	4.90473	6.39805	6.35207	6.08901	6.56014	noncoding	exon1338+	lincRNA-PRR20A-4	lincRNA	181	chr13	+	55163215	55163395	CCTTCTCCCAGGAGATGATTTAATTACCTGCTGAGAATATCTAAGAAACCTACTTCCTCT								88.348	5.30989	6.34982
ASHG19A3L0001817	0.00112138	2.00848	down	36.2234	36.8498	40.2913	95.9096	90.1698	80.9314	104.649	5.3331	5.40259	5.53254	6.54115	6.25466	6.47438	6.4452	noncoding	chr6:63073666-63086291-	lincRNA-KHDRBS2	lincRNA	12626	chr6	-	63073666	63086291	GCAGCCTGTACCTTTAATGCTAAATTGATTTTACTCATCTTTGCATATGTGATCAAGATC	intergenic							92.9149	5.42274	6.42885
ASHG19A3L0002906	0.000552602	4.47451	down	431.35	498.572	357.654	1875.19	1762.86	1589.59	1931.33	8.74122	8.92154	8.52727	10.9533	10.7391	10.9664	10.9082	noncoding	CF887548	lincRNA-NEDD1-3	lincRNA	738	chr12	+	97211559	97269292	ATCTATTTCTTTATCAAGTTGCTTTGGCTTCCCCACTCTCTCCTGCGTTTTGAAAAGAAT	intergenic							1789.74	8.73001	10.8917
ASHG19A3A019799	5.24089e-05	2.09449	down	93.044	99.5345	103.831	247.48	226.596	217.336	236.206	6.65782	6.74728	6.8374	7.77883	7.74166	7.9002	7.8357	noncoding	ENST00000428294	RP3-449O17.1	Ensembl	700	chr22	-	38731766	38794921	GGAGAAGGAAACAGGCCTTTCGGAGGCTCCTCATCCCTCGGAGGTCATCCCTTACTCCAG	intergenic							231.904	6.7475	7.8141
ASHG19A3L0001254	0.0185912	3.45953	down	9.73204	5.18433	10.2269	34.979	29.348	35.7099	37.8696	3.48629	2.32939	3.64649	5.01586	5.03952	4.95535	4.76781	noncoding	DA631333	lincRNA-B4GALT5-2	lincRNA	571	chr20	+	48232411	48237700	GGACTTGCCACTGAGTGGTGTGTTCTACTTGTACCGCTCTTCTGATCGATCAGCGTCTTT	intergenic							34.4766	3.15406	4.94463
ASHG19A3A050618	8.23074e-05	2.08289	down	496.693	503.801	537.535	999.784	968.337	992.761	1009.85	8.91786	8.93577	9.06046	10.0006	10.0444	10.0382	10.0367	noncoding	NR_026862	PPP1R3E	RefSeq_NR	4521	chr14	-	23765112	23772057	ATAGTGAGGGCTCACATTTACTTAACACTTGTGTGCGCAAATCTGGGTTTTTCTTCCTTT	intergenic							992.682	8.97137	10.03
ASHG19A3L0001846	4.06237e-05	195.012	down	6.39501	6.09444	5	1278.67	1337.66	1362.33	1333.03	2.96113	3.22263	2.39437	10.4214	10.5163	10.4125	10.517	noncoding	AK125261	lincRNA-CDHR3	lincRNA	2199	chr7	+	105517266	105672911	ATATGAATTCAACTCAAAAACTGGAGCCAGAAAGTGGAAAGATCCACTAACCCAAATGCC	exon sense-overlapping	NM_152750	CDHR3	cadherin-related family member 3 precursor	+	105603656	105676877	1327.92	2.85938	10.4668
ASHG19A3L0001846	4.06237e-05	195.012	down	6.39501	6.09444	5	1278.67	1337.66	1362.33	1333.03	2.96113	3.22263	2.39437	10.4214	10.5163	10.4125	10.517	noncoding	AK125261	lincRNA-CDHR3	lincRNA	2199	chr7	+	105517266	105672911	ATATGAATTCAACTCAAAAACTGGAGCCAGAAAGTGGAAAGATCCACTAACCCAAATGCC	bidirectional	NM_152749	ATXN7L1	ataxin-7-like protein 1 isoform 2	-	105400635	105517031	1327.92	2.85938	10.4668
ASHG19A3L0001846	4.06237e-05	195.012	down	6.39501	6.09444	5	1278.67	1337.66	1362.33	1333.03	2.96113	3.22263	2.39437	10.4214	10.5163	10.4125	10.517	noncoding	AK125261	lincRNA-CDHR3	lincRNA	2199	chr7	+	105517266	105672911	ATATGAATTCAACTCAAAAACTGGAGCCAGAAAGTGGAAAGATCCACTAACCCAAATGCC	bidirectional	NM_020725	ATXN7L1	ataxin-7-like protein 1 isoform 1	-	105245220	105517031	1327.92	2.85938	10.4668
ASHG19A3L0002317	0.000454563	4.31441	down	84.6168	94.2236	88.4824	426.691	390.556	365.352	516.487	6.52632	6.67451	6.62173	8.96762	8.51835	8.73084	8.64993	noncoding	chrX:55801375-55812875-	lincRNA-RRAGB-1	lincRNA	11501	chrX	-	55801375	55812875	AGCCCCTGCTAGACTCTGTTCCATAATGGTAAACCTGTATGATCACTTGATATTAACATT	intergenic							424.771	6.60752	8.71668
ASHG19A3L0003063	0.00870587	2.18831	down	44.8746	60.9336	36.9433	118.964	118.178	108.32	142.193	5.63083	6.07249	5.41285	7.0111	6.68901	6.78709	6.85364	noncoding	BG197454	lincRNA-NRSN1-4	lincRNA	501	chr6	+	22860365	23017049	ATTTAGTGCCTCCAAATGTGCTGAGCTGGCAAGGGTGTCAAGTGTCATTTTATTCTTGGG	intergenic							121.914	5.70539	6.83521
ASHG19A3A050585	0.00739916	2.58126	down	12.3922	7.33317	5	24.4686	21.1513	32.297	31.94	3.80966	3.4425	2.39437	4.75558	4.88864	4.41131	4.27881	noncoding	uc001wds.1	AK093552	UCSC_knowngene	1951	chr14	-	22849082	22951948	CAGAAATAAACCAAATCACAAGAAGCTTTCAGGTCTGGAGGCTGACATTTCTCAAGACAG	intergenic							27.4642	3.21551	4.58358
ASHG19A3L0001063	0.00503911	2.25362	down	42.1656	25.8242	38.8166	96.0006	87.8195	96.154	106.343	5.54221	4.92841	5.48269	6.56632	6.51153	6.47586	6.40634	noncoding	chr2:134460980-134475605-	lincRNA-NCKAP5-2	lincRNA	14626	chr2	-	134460980	134475605	AGCTCAAAGTAGAAGTTCCCTTTTTCTGTGCGTAAGGAAACACCCCACTGATGAATTCAT	intergenic							96.5792	5.31777	6.49001
ASHG19A3L0001811	0.00328587	2.24137	down	83.9892	96.7541	84.7168	236.272	195.924	195.545	275.646	6.51655	6.70877	6.56413	8.01805	7.58126	7.83038	7.61376	noncoding	chr6:48505291-48527891-	lincRNA-C6orf138-3	lincRNA	22601	chr6	-	48505291	48527891	GGAAACCTTCCCTATTCTTATAATAACTACTAATGCTGGACAAGTAGTCATCTATAGTGA	intergenic							225.847	6.59648	7.76086
ASHG19A3A048829	0.00986423	2.02669	down	65.0515	104.435	71.163	189.426	144.9	184.011	215.35	6.15392	6.81038	6.31378	7.63508	7.48831	7.49473	7.16248	noncoding	ENST00000309884	RP4-575N6.3	Ensembl	492	chr1	-	101736430	101736924	AACAGCCAGTCCTTGGGCCTCATCTTTTTCAAGCTGTTTGCAGACAAATTTCCAAAAACA	intergenic							183.422	6.42603	7.44515
ASHG19A3L0002807	0.000940549	2.10775	down	424.62	476.172	387.379	939.362	820.062	876.741	820.023	8.72052	8.86156	8.63712	9.67682	9.84596	9.95481	9.78417	noncoding	AW387651	lincRNA-TFE3	lincRNA	232	chrX	-	48903267	49031062	AAAGAGGCACGTAGCCGATTAGGCCCAGTACCCCTCCTCTTTCTTCTTTTGTATTTCCTC	natural antisense	NM_002668	PLP2	proteolipid protein 2	+	49028183	49031468	864.047	8.73973	9.81544
ASHG19A3L0002807	0.000940549	2.10775	down	424.62	476.172	387.379	939.362	820.062	876.741	820.023	8.72052	8.86156	8.63712	9.67682	9.84596	9.95481	9.78417	noncoding	AW387651	lincRNA-TFE3	lincRNA	232	chrX	-	48903267	49031062	AAAGAGGCACGTAGCCGATTAGGCCCAGTACCCCTCCTCTTTCTTCTTTTGTATTTCCTC	intronic antisense	NM_001099681	MAGIX	PDZ domain-containing protein MAGIX isoform c	+	49019180	49023836	864.047	8.73973	9.81544
ASHG19A3L0002807	0.000940549	2.10775	down	424.62	476.172	387.379	939.362	820.062	876.741	820.023	8.72052	8.86156	8.63712	9.67682	9.84596	9.95481	9.78417	noncoding	AW387651	lincRNA-TFE3	lincRNA	232	chrX	-	48903267	49031062	AAAGAGGCACGTAGCCGATTAGGCCCAGTACCCCTCCTCTTTCTTCTTTTGTATTTCCTC	intron sense-overlapping	NM_007075	WDR45	WD repeat domain phosphoinositide-interacting	-	48932091	48958059	864.047	8.73973	9.81544
ASHG19A3L0002807	0.000940549	2.10775	down	424.62	476.172	387.379	939.362	820.062	876.741	820.023	8.72052	8.86156	8.63712	9.67682	9.84596	9.95481	9.78417	noncoding	AW387651	lincRNA-TFE3	lincRNA	232	chrX	-	48903267	49031062	AAAGAGGCACGTAGCCGATTAGGCCCAGTACCCCTCCTCTTTCTTCTTTTGTATTTCCTC	intronic antisense	NM_001099682	MAGIX	PDZ domain-containing protein MAGIX isoform d	+	49019180	49023836	864.047	8.73973	9.81544
ASHG19A3L0002807	0.000940549	2.10775	down	424.62	476.172	387.379	939.362	820.062	876.741	820.023	8.72052	8.86156	8.63712	9.67682	9.84596	9.95481	9.78417	noncoding	AW387651	lincRNA-TFE3	lincRNA	232	chrX	-	48903267	49031062	AAAGAGGCACGTAGCCGATTAGGCCCAGTACCCCTCCTCTTTCTTCTTTTGTATTTCCTC	intronic antisense	NM_033626	CCDC120	coiled-coil domain-containing protein 120	+	48916515	48927510	864.047	8.73973	9.81544
ASHG19A3L0002807	0.000940549	2.10775	down	424.62	476.172	387.379	939.362	820.062	876.741	820.023	8.72052	8.86156	8.63712	9.67682	9.84596	9.95481	9.78417	noncoding	AW387651	lincRNA-TFE3	lincRNA	232	chrX	-	48903267	49031062	AAAGAGGCACGTAGCCGATTAGGCCCAGTACCCCTCCTCTTTCTTCTTTTGTATTTCCTC	intron sense-overlapping	NM_007213	PRAF2	PRA1 family protein 2	-	48928817	48931662	864.047	8.73973	9.81544
ASHG19A3L0002807	0.000940549	2.10775	down	424.62	476.172	387.379	939.362	820.062	876.741	820.023	8.72052	8.86156	8.63712	9.67682	9.84596	9.95481	9.78417	noncoding	AW387651	lincRNA-TFE3	lincRNA	232	chrX	-	48903267	49031062	AAAGAGGCACGTAGCCGATTAGGCCCAGTACCCCTCCTCTTTCTTCTTTTGTATTTCCTC	intron sense-overlapping	NM_001029896	WDR45	WD repeat domain phosphoinositide-interacting	-	48932091	48937564	864.047	8.73973	9.81544
ASHG19A3L0002807	0.000940549	2.10775	down	424.62	476.172	387.379	939.362	820.062	876.741	820.023	8.72052	8.86156	8.63712	9.67682	9.84596	9.95481	9.78417	noncoding	AW387651	lincRNA-TFE3	lincRNA	232	chrX	-	48903267	49031062	AAAGAGGCACGTAGCCGATTAGGCCCAGTACCCCTCCTCTTTCTTCTTTTGTATTTCCTC	intronic antisense	NM_001163321	CCDC120	coiled-coil domain-containing protein 120	+	48916522	48927510	864.047	8.73973	9.81544
ASHG19A3L0002807	0.000940549	2.10775	down	424.62	476.172	387.379	939.362	820.062	876.741	820.023	8.72052	8.86156	8.63712	9.67682	9.84596	9.95481	9.78417	noncoding	AW387651	lincRNA-TFE3	lincRNA	232	chrX	-	48903267	49031062	AAAGAGGCACGTAGCCGATTAGGCCCAGTACCCCTCCTCTTTCTTCTTTTGTATTTCCTC	intronic antisense	NM_001099680	MAGIX	PDZ domain-containing protein MAGIX isoform b	+	49020269	49023836	864.047	8.73973	9.81544
ASHG19A3L0002807	0.000940549	2.10775	down	424.62	476.172	387.379	939.362	820.062	876.741	820.023	8.72052	8.86156	8.63712	9.67682	9.84596	9.95481	9.78417	noncoding	AW387651	lincRNA-TFE3	lincRNA	232	chrX	-	48903267	49031062	AAAGAGGCACGTAGCCGATTAGGCCCAGTACCCCTCCTCTTTCTTCTTTTGTATTTCCTC	intronic antisense	NM_001163322	CCDC120	coiled-coil domain-containing protein 120	+	48916515	48927510	864.047	8.73973	9.81544
ASHG19A3L0002807	0.000940549	2.10775	down	424.62	476.172	387.379	939.362	820.062	876.741	820.023	8.72052	8.86156	8.63712	9.67682	9.84596	9.95481	9.78417	noncoding	AW387651	lincRNA-TFE3	lincRNA	232	chrX	-	48903267	49031062	AAAGAGGCACGTAGCCGATTAGGCCCAGTACCCCTCCTCTTTCTTCTTTTGTATTTCCTC	intronic antisense	NM_024859	MAGIX	PDZ domain-containing protein MAGIX isoform a	+	49019180	49023836	864.047	8.73973	9.81544
ASHG19A3L0002807	0.000940549	2.10775	down	424.62	476.172	387.379	939.362	820.062	876.741	820.023	8.72052	8.86156	8.63712	9.67682	9.84596	9.95481	9.78417	noncoding	AW387651	lincRNA-TFE3	lincRNA	232	chrX	-	48903267	49031062	AAAGAGGCACGTAGCCGATTAGGCCCAGTACCCCTCCTCTTTCTTCTTTTGTATTTCCTC	intronic antisense	NM_001163323	CCDC120	coiled-coil domain-containing protein 120	+	48916522	48927510	864.047	8.73973	9.81544
ASHG19A3L0002807	0.000940549	2.10775	down	424.62	476.172	387.379	939.362	820.062	876.741	820.023	8.72052	8.86156	8.63712	9.67682	9.84596	9.95481	9.78417	noncoding	AW387651	lincRNA-TFE3	lincRNA	232	chrX	-	48903267	49031062	AAAGAGGCACGTAGCCGATTAGGCCCAGTACCCCTCCTCTTTCTTCTTTTGTATTTCCTC	intron sense-overlapping	NM_015698	GPKOW	G patch domain and KOW motifs-containing	-	48969021	48980079	864.047	8.73973	9.81544
ASHG19A3L0001550	0.0241882	2.46253	down	12.2737	5.00358	5	20.6917	21.828	16.2711	22.8878	3.79671	2.32208	2.39437	4.23968	3.83685	4.15199	4.32293	noncoding	chr4:97016802-97027502+	lincRNA-C4orf37-3	lincRNA	10701	chr4	+	97016802	97027502	AAGGACATACAATGACCTGGTGCTTTGACTTTGAAAGCTGAGATAGTACTTCACATATTT	intergenic							20.4196	2.83772	4.13786
ASHG19A3A048823	0.000204804	5.0991	down	5	5	5	25.0193	32.2455	30.6708	30.672	2.37766	2.32192	2.39437	4.69187	4.81309	4.44736	4.90724	noncoding	uc001stv.1	AK124066	UCSC_knowngene	1791	chr12	+	68383224	68415107	TAGTCATTTGGGAAGGAATAAGCCTGGAAGAAAAAGATACAACGAACTAGCACAACGAGG	intergenic							29.6519	2.36465	4.71489
ASHG19A3L0001259	0.00056033	6.17375	down	188.922	211.74	145.451	1218.27	1102.3	1008.46	1116.45	7.62486	7.77061	7.30048	10.1451	10.069	10.3364	10.2153	noncoding	exon2436+	lincRNA-PTPN1-2	lincRNA	264	chr20	+	49047223	49047486	GCAAGGGATTTTCATCAAGAGGAATCTCTAACCTCAGCCCATCCCTGCAACTCACCCCTG								1111.37	7.56532	10.1915
ASHG19A3A029493	0.00344679	2.08394	down	12.5408	13.6586	17.8755	39.2712	43.5463	37.9916	40.4214	3.82796	4.13813	4.40799	5.11649	5.13272	5.12886	5.35796	noncoding	ENST00000407157	RP3-369A17.2	Ensembl	560	chr6	-	24750899	24751852	TGTGAACTGGATTTCATCTTCCATGTGGCTCACATTATTCTTGTAGAAATGATATTGGGA	intergenic							40.3076	4.12469	5.18401
ASHG19A3L0002704	0.00914839	2.70641	down	193.364	320.578	195.502	673.931	612.29	525.997	710.055	7.65631	8.32734	7.70184	9.46252	9.07999	9.43773	9.34594	noncoding	BG210561	lincRNA-AGRP-2	lincRNA	697	chr16	-	67551608	67552290	AAAGAACTCATCTAGACTTTTCTTGTACCTCTGCTCCCCAAACAGCTTCTCTTTTCAGGT	intergenic							630.568	7.89516	9.33154
ASHG19A3A012163	0.0246714	2.54243	down	15.4595	5.40406	5.52519	27.5895	17.1438	25.7176	32.7138	4.11844	2.36572	2.89535	4.79349	4.54473	4.59998	3.95266	noncoding	uc001htg.1	AX748369	UCSC_knowngene	2575	chr1	-	229050379	229052954	TTGGAGGTGAACAAGCTAGTAACAAACAAAAGCCAATGTGTGTATGTGTATGTTTGTATA	intergenic							25.7912	3.12651	4.47272
ASHG19A3L0001712	0.0112389	2.98708	down	85.0412	132.717	70.5793	321.11	325.478	245.462	340.853	6.53287	7.13758	6.30187	8.33164	7.93014	8.29843	8.38449	noncoding	AA935188	lincRNA-MCM9	lincRNA	178	chr6	+	119110701	119110864	TTCTGATTGATGTGAATCCTCCTCACTGCACGTCTCCTCATTCTTACTGATTTGGCCAAG	intergenic							308.226	6.65744	8.23618
ASHG19A3A008380	0.0105585	2.10986	down	13.4497	19.2561	11.8619	40.725	41.4958	37.5824	41.8856	3.92552	4.55981	3.84909	5.17026	5.11601	5.18085	5.28733	noncoding	ENST00000476232	RP11-568K15.1	Ensembl	2921	chr1	-	177975270	178007085	CGGGGTGAATGTGGCCATCGACATGGTGGGAGGAGACATCTGCCTGGAGGCTCTCCGCAG	intergenic							40.4222	4.11147	5.18861
ASHG19A3L0003060	7.36512e-07	22.7865	down	129.107	149.231	148.552	3368.75	3081.09	3260.27	3113.45	7.10221	7.29606	7.32787	11.6574	11.7878	11.8306	11.7328	noncoding	AK300950	lincRNA-FAM65B-1	lincRNA	2415	chr6	-	24840552	25042246	TTTTGCTTGTAATGTTTCTGCATGTGGCCAGCATTATAGAATGCTCCAGGCCAGAGAATG	exon sense-overlapping	NM_015864	FAM65B	family with sequence similarity 65, member B	-	24839594	24877583	3205.89	7.24204	11.7522
ASHG19A3L0003060	7.36512e-07	22.7865	down	129.107	149.231	148.552	3368.75	3081.09	3260.27	3113.45	7.10221	7.29606	7.32787	11.6574	11.7878	11.8306	11.7328	noncoding	AK300950	lincRNA-FAM65B-1	lincRNA	2415	chr6	-	24840552	25042246	TTTTGCTTGTAATGTTTCTGCATGTGGCCAGCATTATAGAATGCTCCAGGCCAGAGAATG	exon sense-overlapping	NM_014722	FAM65B	family with sequence similarity 65, member B	-	24804512	24911195	3205.89	7.24204	11.7522
ASHG19A3L0000627	0.0100771	2.95688	down	15.3583	7.80485	8.12353	30.5673	54.7449	41.5681	41.2016	4.10989	3.51027	3.33911	5.14565	5.26668	4.75302	5.70331	noncoding	CA502833	lincRNA-C13orf31-2	lincRNA	725	chr13	-	44649456	44650165	AGATTTATCTTTGCCATCCAAACACGTTTGCAGTCCACACCAGATGAGAACATATATGCT	intergenic							42.0205	3.65309	5.21717
ASHG19A3L0000910	0.0236311	3.21749	down	13.4689	7.24546	5	45.4341	23.4834	41.2977	31.0532	3.92712	3.43077	2.39437	4.71216	5.25571	5.34946	4.42943	noncoding	chr17:15385375-15392225+	lincRNA-FAM18B2	lincRNA	6851	chr17	+	15385375	15392225	CTCTTATCATGGTCATTGCTCCAGCTGTCATCAACAGCTGTCATCAACTGGTGTCTTCAA	intronic antisense	NM_001204478	FAM18B2-CDRT4	hypothetical protein LOC100533496	-	15339331	15466945	35.3171	3.25075	4.93669
ASHG19A3L0002320	0.00262769	4.00601	down	13.5912	11.3447	16.4975	59.024	70.3248	83.4169	78.4202	3.94143	3.92052	4.30299	6.11033	6.29757	5.74152	6.07916	noncoding	FN096908	lincRNA-ZXDB	lincRNA	104	chrX	-	57926299	57926409	GGGCCTGACTATGAATGCCAAAATGTTATGAAATTGGAGGCTATTGATATTTACATGAAA	intergenic							72.7965	4.05498	6.05715
ASHG19A3A038376	0.000143275	7.42007	down	5	5.45403	5	39.1597	43.0218	39.1685	55.1912	2.37766	2.4741	2.39437	5.58482	5.17874	5.12443	5.33923	noncoding	ENST00000416996	RP11-120J1.1	Ensembl	964	chr9	+	14317083	14357853	ATTGACAAGTATTACACAGAAGAGCCCACAAAAGCTTCAGCAACACCAAGGGCGAAGAAG	intronic antisense	NM_001190738	NFIB	nuclear factor 1 B-type isoform 2	-	14081841	14398982	44.1353	2.41537	5.30681
ASHG19A3A051112	0.000125468	2.60443	down	964.557	1013.76	990.572	2350.75	2049.7	2252.41	2423.68	9.81413	9.87505	9.90306	11.2934	11.2477	11.3085	11.1306	noncoding	NR_003138	SNHG10	RefSeq_NR	1972	chr14	-	95999252	96001209	GATTGCTCATTTTCTAATGTGGGACCTGAAATTTACCAGGTGCTTAAAGAATCTTTTTGT	bidirectional	NM_016417	GLRX5	glutaredoxin-related protein 5, mitochondrial	+	96001322	96011055	2269.13	9.86408	11.245
ASHG19A3A050767	0.00392202	5.74981	down	5	11.3083	5	54.3396	35.6387	53.5038	47.3381	2.37766	3.91662	2.39437	5.35382	5.6477	5.61885	5.05855	noncoding	uc001eix.1	FLJ00310	UCSC_knowngene	5786	chr1	-	142620644	142714605	GGGGCATCAAAGACTCAAGTTAAGATAAGATACATCTACAAGTACATTAATTGGTAGACA	intergenic							47.7051	2.89622	5.41973
ASHG19A3L0002636	0.00544199	4.50146	down	5	10.1925	5	36.7524	34.0499	38.0324	36.3323	2.37766	3.79524	2.39437	4.95548	5.13404	5.0264	4.98866	noncoding	AK310900	lincRNA-SYT9	lincRNA	4074	chr11	+	7041699	7159136	GTGAAGTTATATAAAGTCTTGAAGTCTCCTAAGTGTAAACTACAAGTTCTAGGCCTCACC	bidirectional	NM_013249	ZNF214	zinc finger protein 214	-	7020548	7041586	36.2917	2.85575	5.02615
ASHG19A3L0002636	0.00544199	4.50146	down	5	10.1925	5	36.7524	34.0499	38.0324	36.3323	2.37766	3.79524	2.39437	4.95548	5.13404	5.0264	4.98866	noncoding	AK310900	lincRNA-SYT9	lincRNA	4074	chr11	+	7041699	7159136	GTGAAGTTATATAAAGTCTTGAAGTCTCCTAAGTGTAAACTACAAGTTCTAGGCCTCACC	intron sense-overlapping	NM_014469	RBMXL2	RNA-binding motif protein, X-linked-like-2	+	7110164	7112379	36.2917	2.85575	5.02615
ASHG19A3L0002636	0.00544199	4.50146	down	5	10.1925	5	36.7524	34.0499	38.0324	36.3323	2.37766	3.79524	2.39437	4.95548	5.13404	5.0264	4.98866	noncoding	AK310900	lincRNA-SYT9	lincRNA	4074	chr11	+	7041699	7159136	GTGAAGTTATATAAAGTCTTGAAGTCTCCTAAGTGTAAACTACAAGTTCTAGGCCTCACC	exon sense-overlapping	NM_176822	NLRP14	NACHT, LRR and PYD domains-containing protein	+	7041699	7092757	36.2917	2.85575	5.02615
ASHG19A3A050100	7.26178e-05	3.98986	down	4056.73	4137.35	4045.56	13984.4	11737.1	12864.8	14839	11.8222	11.864	11.8787	13.9487	13.8096	13.9336	13.7133	noncoding	uc001uyq.1	AK054970	UCSC_knowngene	3681	chr13	+	42813345	42817026	CATCTTTCCCAAAGGGCACTGCCTTGAGATCATCCTTCTCAAATAAAAAGAATGCATTTG	intergenic							13356.3	11.855	13.8513
ASHG19A3A025747	0.0017339	2.69792	down	62.9399	46.8454	63.3668	185.425	156.741	181.091	195.654	6.10398	5.72252	6.15466	7.49298	7.46665	7.46242	7.28023	noncoding	ENST00000450559	RP11-576N17.3	Ensembl	1004	chr4	+	84168330	84169334	AGTTACATGCCCTGCCAGTAGTCAGCCAGGGATAATGCTGCTGGTAGAGGTGCGGCAGAA	intergenic							179.728	5.99372	7.42557
ASHG19A3A043449	9.75587e-05	3.80583	down	184.428	191.926	200.166	746.736	662.549	753.744	795.597	7.58873	7.63538	7.73243	9.62769	9.62694	9.59594	9.471	noncoding	ENST00000456581	RP11-500G10.1	Ensembl	2843	chr10	-	131864637	131909081	GGGCAAAAGGTCTAAAGAGCAATTTCTAAAGGTTCCTTTGTGTCTAAGATTCTGGGTCTT	intergenic							739.656	7.65218	9.58039
ASHG19A3L0000035	0.00937945	2.25189	down	27.6872	38.0015	27.1347	102.537	71.8667	73.3715	95.7294	4.95535	5.44327	4.98866	6.40375	6.11832	6.57006	6.10877	noncoding	BF477013	lincRNA-CACNA1E-4	lincRNA	168	chr1	+	181065777	181065895	AATGAATCACAGAGCTGCTCAGATGGAGAAATCCAAAAGTGCCTCTTTGCCTTATCTCCC	intergenic							85.8761	5.12909	6.30023
ASHG19A3A048512	0.000343526	2.96234	down	47.8076	45.8097	46.7909	186.415	145.035	142.348	184.766	5.72029	5.69258	5.73777	7.40104	7.09936	7.46952	7.16453	noncoding	ENST00000442418	RP11-86H7.1	Ensembl	748	chr1	-	95104016	95285652	AAATTGTGGCCTGCCATGAAGTTGTGAGAGAAAAGCATCCCTCATTTCTTCAGGAAAGGC	bidirectional	NM_152369	SLC44A3	choline transporter-like protein 3 isoform 2	+	95286099	95360802	164.641	5.71688	7.28361
ASHG19A3A048512	0.000343526	2.96234	down	47.8076	45.8097	46.7909	186.415	145.035	142.348	184.766	5.72029	5.69258	5.73777	7.40104	7.09936	7.46952	7.16453	noncoding	ENST00000442418	RP11-86H7.1	Ensembl	748	chr1	-	95104016	95285652	AAATTGTGGCCTGCCATGAAGTTGTGAGAGAAAAGCATCCCTCATTTCTTCAGGAAAGGC	bidirectional	NM_001114106	SLC44A3	choline transporter-like protein 3 isoform 1	+	95285900	95360802	164.641	5.71688	7.28361
ASHG19A3L0001758	1.20243e-05	33.595	down	543.784	524.611	604.637	17336.8	14437.4	16483.1	17300.1	9.03621	8.98587	9.22434	14.1656	14.1742	14.2587	14.0106	noncoding	BX647686	lincRNA-CCR6	lincRNA	5327	chr6	+	167412892	167552626	GGAATGAACTGTCATGTAAACATACCGACATGTTTAAACCTGACAATGGTGTTATTTGAA	exon sense-overlapping	NM_031409	CCR6	C-C chemokine receptor type 6	+	167536240	167552629	16389.4	9.08214	14.1523
ASHG19A3L0001758	1.20243e-05	33.595	down	543.784	524.611	604.637	17336.8	14437.4	16483.1	17300.1	9.03621	8.98587	9.22434	14.1656	14.1742	14.2587	14.0106	noncoding	BX647686	lincRNA-CCR6	lincRNA	5327	chr6	+	167412892	167552626	GGAATGAACTGTCATGTAAACATACCGACATGTTTAAACCTGACAATGGTGTTATTTGAA	exon sense-overlapping	NM_194429	FGFR1OP	FGFR1 oncogene partner isoform b	+	167412815	167454066	16389.4	9.08214	14.1523
ASHG19A3L0001758	1.20243e-05	33.595	down	543.784	524.611	604.637	17336.8	14437.4	16483.1	17300.1	9.03621	8.98587	9.22434	14.1656	14.1742	14.2587	14.0106	noncoding	BX647686	lincRNA-CCR6	lincRNA	5327	chr6	+	167412892	167552626	GGAATGAACTGTCATGTAAACATACCGACATGTTTAAACCTGACAATGGTGTTATTTGAA	exon sense-overlapping	NM_007045	FGFR1OP	FGFR1 oncogene partner isoform a	+	167412815	167454066	16389.4	9.08214	14.1523
ASHG19A3L0001758	1.20243e-05	33.595	down	543.784	524.611	604.637	17336.8	14437.4	16483.1	17300.1	9.03621	8.98587	9.22434	14.1656	14.1742	14.2587	14.0106	noncoding	BX647686	lincRNA-CCR6	lincRNA	5327	chr6	+	167412892	167552626	GGAATGAACTGTCATGTAAACATACCGACATGTTTAAACCTGACAATGGTGTTATTTGAA	exon sense-overlapping	NM_004367	CCR6	C-C chemokine receptor type 6	+	167525294	167552629	16389.4	9.08214	14.1523
ASHG19A3L0001207	0.0477379	4.71402	down	5	5	8.14712	21.2351	28.846	72.6407	29.3802	2.37766	2.32192	3.34215	4.62849	6.10398	4.19267	4.74498	noncoding	chr2:68206296-68223571-	lincRNA-ETAA1-2	lincRNA	17276	chr2	-	68206296	68223571	GTTTCTACAAATAGGAGTTGGGTGTTTCTGAAACATATGTCTTCCAAGCTCATTATTGTC	intergenic							38.0255	2.68058	4.91753
ASHG19A3A042734	0.00149762	4.31163	down	39.5665	31.6917	35.4908	130.006	182.817	198.969	230.916	5.45164	5.20027	5.35426	7.74188	7.60364	6.91885	7.51012	noncoding	ENST00000423803	RP11-292F22.2	Ensembl	1604	chr10	-	47605126	47644791	AAGTCAGCTTGAACAACGGCAAAACATTCAAGAGCAATGTCAGCATCACCAGCACCACAT	intergenic							185.677	5.33539	7.44362
ASHG19A3A009497	5.55801e-05	6.19656	down	34.8091	40.337	30.3739	237.89	249.751	255.381	266.789	5.27972	5.52025	5.14418	7.96459	7.98722	7.84023	7.99268	noncoding	uc002huv.2	CR597260	UCSC_knowngene	1013	chr17	+	38673277	38683253	TTTGATTTGAACCTTGAAGAACAAGCAGAGACCCAAGAAGTACAGAAGAGGGGAGGTGGA	intergenic							252.453	5.31471	7.94618
ASHG19A3A048266	0.000523977	2.53708	down	42.3328	48.341	39.4204	115.447	140.851	137.678	131.082	5.54773	5.76312	5.50167	6.88098	7.04941	6.73974	7.11924	noncoding	uc001dps.2	CR609342	UCSC_knowngene	1003	chr1	-	93730202	93811374	AGTTCTCATCATGATACTTTAAGGATGAGGACAGCTGATGTGGCTGGCCTGAAAAATAAG	bidirectional	NM_001938	DR1	protein Dr1	+	93811477	93828148	131.264	5.60417	6.94734
ASHG19A3A048266	0.000523977	2.53708	down	42.3328	48.341	39.4204	115.447	140.851	137.678	131.082	5.54773	5.76312	5.50167	6.88098	7.04941	6.73974	7.11924	noncoding	uc001dps.2	CR609342	UCSC_knowngene	1003	chr1	-	93730202	93811374	AGTTCTCATCATGATACTTTAAGGATGAGGACAGCTGATGTGGCTGGCCTGAAAAATAAG	natural antisense	NM_206886	CCDC18	coiled-coil domain-containing protein 18	+	93646280	93744287	131.264	5.60417	6.94734
ASHG19A3L0003432	0.000369093	4.0468	down	89.6254	100.1	69.2423	370.474	370.752	373.044	406.85	6.60312	6.75499	6.27571	8.60145	8.55327	8.51819	8.57265	noncoding	chr9:81993205-81999034-	lincRNA-PSAT1-1	lincRNA	5830	chr9	-	81993205	81999034	TACAAAGAGGGCTCTCCTTACCCTACCAAATGCAGATCTTTTGTGAAGAGAAATGGTCAG	intergenic							380.28	6.54461	8.56139
ASHG19A3A022574	9.06102e-06	5.80489	down	785.949	775.361	834.657	4235.24	3931.37	4125.46	4124.75	9.53061	9.51539	9.6734	12.0542	12.1295	12.1644	12.0935	noncoding	uc003cqw.1	AK096853	UCSC_knowngene	2353	chr3	+	47205986	47285546	TAGAAAATCTGTTTCTTCCTCTTTCCTCCTCCTTGCAACGAGTATGGCTCAGGGAACTGA	natural antisense	NM_182902	KIF9	kinesin-like protein KIF9 isoform 2	-	47269515	47324337	4104.21	9.57313	12.1104
ASHG19A3A022574	9.06102e-06	5.80489	down	785.949	775.361	834.657	4235.24	3931.37	4125.46	4124.75	9.53061	9.51539	9.6734	12.0542	12.1295	12.1644	12.0935	noncoding	uc003cqw.1	AK096853	UCSC_knowngene	2353	chr3	+	47205986	47285546	TAGAAAATCTGTTTCTTCCTCTTTCCTCCTCCTTGCAACGAGTATGGCTCAGGGAACTGA	natural antisense	NM_022342	KIF9	kinesin-like protein KIF9 isoform 1	-	47269515	47324337	4104.21	9.57313	12.1104
ASHG19A3A022574	9.06102e-06	5.80489	down	785.949	775.361	834.657	4235.24	3931.37	4125.46	4124.75	9.53061	9.51539	9.6734	12.0542	12.1295	12.1644	12.0935	noncoding	uc003cqw.1	AK096853	UCSC_knowngene	2353	chr3	+	47205986	47285546	TAGAAAATCTGTTTCTTCCTCTTTCCTCCTCCTTGCAACGAGTATGGCTCAGGGAACTGA	bidirectional	NM_014159	SETD2	histone-lysine N-methyltransferase SETD2	-	47057897	47205467	4104.21	9.57313	12.1104
ASHG19A3A022574	9.06102e-06	5.80489	down	785.949	775.361	834.657	4235.24	3931.37	4125.46	4124.75	9.53061	9.51539	9.6734	12.0542	12.1295	12.1644	12.0935	noncoding	uc003cqw.1	AK096853	UCSC_knowngene	2353	chr3	+	47205986	47285546	TAGAAAATCTGTTTCTTCCTCTTTCCTCCTCCTTGCAACGAGTATGGCTCAGGGAACTGA	natural antisense	NM_001134878	KIF9	kinesin-like protein KIF9 isoform 2	-	47269515	47324337	4104.21	9.57313	12.1104
ASHG19A3A050268	6.02985e-05	2.92261	down	655.331	695.962	707.687	1888.21	1691.77	1782.25	1900.9	9.29239	9.36746	9.44165	10.9282	10.9008	10.9766	10.8521	noncoding	ENST00000442229	RP11-248N6.1	Ensembl	888	chr13	+	68476486	68477374	GTCGAATCTCATGATCTGTTCCATCCTTTTTCTTGTGTGGGTAAGAAAGGGCAACCACAT	intergenic							1815.78	9.36717	10.9144
ASHG19A3A051786	0.00670267	3.48492	down	272.615	278.704	273.727	1612.15	732.978	803.379	807.173	8.10598	8.13857	8.15443	9.65165	9.72025	10.7474	9.61718	noncoding	BC036602		RNAdb	1336	chr14	+	101319252	101320560	AATTCTGTCTCTTGACATTGTCATTTGCATGCTCCCCACACACAAATCCTTTCCTGGTGA	intergenic							988.921	8.13299	9.93412
ASHG19A3A024331	0.0160913	4.51119	down	5	9.32128	11.7747	62.8888	39.1148	41.9159	55.6176	2.37766	3.6946	3.84037	5.5959	5.28025	5.83683	5.19789	noncoding	NR_026769	PPBPL2	RefSeq_NR	1362	chr4	-	74919754	74921116	CTCAAGAGGAAGTCTTCAGGCTCTAGAAACATCTTTAACTTCGGCTTCTGCACCATAAGC	intergenic							49.8843	3.30421	5.47772
ASHG19A3L0000299	1.91615e-05	2.10225	down	40.1129	41.2354	38.3032	97.4857	98.8311	106.726	103.453	5.4712	5.55108	5.46399	6.52243	6.66904	6.49655	6.5814	noncoding	BC058549	lincRNA-PLCE1	lincRNA	737	chr10	+	95653757	95713998	TTGTGGATCAGGAAAGGTCCTAAACAAAGCACAGGGGAATGGCACTAATCTCACCAGTAA	exon sense-overlapping	NM_153226	TMEM20	transmembrane protein 20 isoform 2	+	95653729	95662491	101.624	5.49542	6.56736
ASHG19A3L0000299	1.91615e-05	2.10225	down	40.1129	41.2354	38.3032	97.4857	98.8311	106.726	103.453	5.4712	5.55108	5.46399	6.52243	6.66904	6.49655	6.5814	noncoding	BC058549	lincRNA-PLCE1	lincRNA	737	chr10	+	95653757	95713998	TTGTGGATCAGGAAAGGTCCTAAACAAAGCACAGGGGAATGGCACTAATCTCACCAGTAA	exon sense-overlapping	NM_001134658	TMEM20	transmembrane protein 20 isoform 1	+	95653729	95662491	101.624	5.49542	6.56736
ASHG19A3A018445	0.0101322	5.52362	down	5	14.5375	8.0423	67.1005	63.0039	49.0824	60.4415	2.37766	4.21284	3.32816	5.71739	5.51677	5.93345	5.91971	noncoding	ENST00000452336	RP4-530I15.6	Ensembl	638	chr20	+	49262007	49276828	ACACAGGATGTTCCTGTTGGTCCAGATACTTGAGCTAAAAGGTGATGGATACCTGGATGT	intergenic							59.9071	3.30622	5.77183
ASHG19A3L0000376	0.021321	2.66476	down	5	6.5658	13.1663	35.4809	25.8425	30.2987	22.7738	2.37766	3.32572	3.98425	4.23138	4.79452	4.97574	4.57121	noncoding	BF832319	lincRNA-C11orf74-1	lincRNA	677	chr11	-	38156256	38156915	CCAGTTTTTGTTTGTTTGTTATATTTGAGTTCTGCATACATGTGCTGAAATGTGGCTTTG	intergenic							28.599	3.22921	4.64321
ASHG19A3L0001819	0.0414108	2.22852	down	8.3824	18.2355	12.1695	30.8504	43.2593	31.6342	42.1765	3.27158	4.49281	3.87916	5.18012	4.85782	4.76549	5.34562	noncoding	DB340628	lincRNA-CD109	lincRNA	543	chr6	-	74571998	74572540	TTTAGCTGAAGATTTCAAACAAAGCCGTCAGAGCACAGGTCTCCATGGCTTGTAGGACAA	intergenic							36.9801	3.88118	5.03726
ASHG19A3L0000740	0.00109037	2.47416	down	86.9988	96.5045	101.355	279.597	233.37	241.293	294.791	6.56325	6.70674	6.8034	8.12021	7.90185	8.08842	7.88178	noncoding	chr14:59616072-59635747-	lincRNA-DACT1	lincRNA	19676	chr14	-	59616072	59635747	GCTGTTCCTCATCAGTTCCTCTGACCTTGGTCTTTTCTATTGTTCATTGAAAGTGCAGCT	intergenic							262.263	6.69113	7.99807
ASHG19A3A031975	0.000496526	2.34507	down	98.9074	101.372	98.0112	268.585	222.76	250.837	302.073	6.74637	6.77236	6.75886	8.15597	7.96459	8.02661	7.80815	noncoding	uc003pwf.2	BC042098	UCSC_knowngene	2007	chr6	+	114290864	114661893	AGCCTGCCAACTCCTGATTTTGTCATTACCCTCAGAACTCCAGAATGTAAGCTCCATGAA	intronic antisense	NM_001527	HDAC2	histone deacetylase 2	-	114257319	114292359	261.064	6.7592	7.98883
ASHG19A3A031975	0.000496526	2.34507	down	98.9074	101.372	98.0112	268.585	222.76	250.837	302.073	6.74637	6.77236	6.75886	8.15597	7.96459	8.02661	7.80815	noncoding	uc003pwf.2	BC042098	UCSC_knowngene	2007	chr6	+	114290864	114661893	AGCCTGCCAACTCCTGATTTTGTCATTACCCTCAGAACTCCAGAATGTAAGCTCCATGAA	intronic antisense	NM_153612	HS3ST5	heparan sulfate glucosamine 3-O-sulfotransferase	-	114376749	114384041	261.064	6.7592	7.98883
ASHG19A3A015614	9.87068e-05	4.83717	down	147.422	149.256	113.632	620.765	682.787	691.079	722.287	7.28023	7.29623	6.96141	9.48618	9.50073	9.31009	9.5168	noncoding	AK123196		RNAdb	1909	chr2	+	46896008	46897917	CATATGGTGCAGTCTAACCCAATGCATATGGAACTGTTTGGACAGAATAAAATAGTTTAA	intergenic							679.23	7.17929	9.45345
ASHG19A3A015154	0.00750175	2.26257	down	88.7159	84.0053	64.9579	238.98	200.112	171.484	202.558	6.58847	6.50865	6.18734	7.54527	7.38281	7.84805	7.64833	noncoding	uc002vwf.1	AK056246	UCSC_knowngene	2341	chr2	-	237968076	237994460	ATATTTGTGTTTTACATCCCTCACTAGACCCCCAGGAAAGAGGCTTTGATGTGTTGCCTG	natural antisense	NM_006710	COPS8	COP9 signalosome complex subunit 8 isoform 1	+	237994083	238007489	203.283	6.42815	7.60611
ASHG19A3A015154	0.00750175	2.26257	down	88.7159	84.0053	64.9579	238.98	200.112	171.484	202.558	6.58847	6.50865	6.18734	7.54527	7.38281	7.84805	7.64833	noncoding	uc002vwf.1	AK056246	UCSC_knowngene	2341	chr2	-	237968076	237994460	ATATTTGTGTTTTACATCCCTCACTAGACCCCCAGGAAAGAGGCTTTGATGTGTTGCCTG	natural antisense	NM_198189	COPS8	COP9 signalosome complex subunit 8 isoform 2	+	237994083	238007489	203.283	6.42815	7.60611
ASHG19A3L0001860	0.00325728	2.30053	down	144.49	184.567	169.451	446.883	332.729	385.05	454.111	7.25301	7.58229	7.50497	8.77151	8.60028	8.80529	8.4178	noncoding	chr7:127179214-127190764+	lincRNA-GCC1	lincRNA	11551	chr7	+	127179214	127190764	TTTTGTGCTGCAGTCCAATTTGATGTGTCAAAATTCTGTCTTTCATCTGCCCTTCTACAA	intergenic							404.693	7.44675	8.64872
ASHG19A3L0002776	5.21402e-06	4.67848	down	635.216	663.455	653.521	2683.63	2640	2783.78	2865.94	9.25374	9.30487	9.33313	11.5341	11.5582	11.4905	11.5104	noncoding	BP264199	lincRNA-GCNT3	lincRNA	578	chr15	+	59848253	59911852	TTATAAGGCCATCTATGGGACTGAACTTTGAGACACACTATGAGAGCGTTGCTACCTGTG	exon sense-overlapping	NM_004751	GCNT3	beta-1,3-galactosyl-O-glycosyl-glycoprotein	+	59903981	59912210	2743.34	9.29725	11.5233
ASHG19A3L0000982	0.0279956	2.5153	down	6.03861	16.9193	9.13616	37.801	29.1945	32.221	37.4763	2.89535	4.40115	3.49689	4.99889	4.88321	5.07081	4.76119	noncoding	BQ720489	lincRNA-CDH19	lincRNA	965	chr18	-	64349494	64350305	TTTGGGTTTACCCAAATTCCTTTGTGCCTTTTCGGCAAGCCTTTAACATATATATTTCTC	intergenic							34.1732	3.5978	4.92853
ASHG19A3A024597	0.00626014	2.68619	down	23.5545	45.8296	28.2132	126.073	93.115	99.2127	94.4296	4.72566	5.69356	5.04164	6.38205	6.55915	6.87865	6.49687	noncoding	NR_026968	LOC285456	RefSeq_NR	3773	chr4	-	109459345	109541613	TAAAAATCTGTCCATGGGCCCTAAACATATTGTGAGTCTCTAGTCGCTGTGCCCTTTGTG	bidirectional	NM_033625	RPL34	60S ribosomal protein L34	+	109541748	109551639	103.208	5.15362	6.57918
ASHG19A3A024597	0.00626014	2.68619	down	23.5545	45.8296	28.2132	126.073	93.115	99.2127	94.4296	4.72566	5.69356	5.04164	6.38205	6.55915	6.87865	6.49687	noncoding	NR_026968	LOC285456	RefSeq_NR	3773	chr4	-	109459345	109541613	TAAAAATCTGTCCATGGGCCCTAAACATATTGTGAGTCTCTAGTCGCTGTGCCCTTTGTG	bidirectional	NM_000995	RPL34	60S ribosomal protein L34	+	109541721	109551639	103.208	5.15362	6.57918
ASHG19A3A039797	3.74069e-05	2.75984	down	5	5.51079	5	17.6738	17.0561	17.4746	17.8128	2.37766	2.57168	2.39437	3.84298	3.94907	3.91102	3.94689	noncoding	ENST00000446884	RP1-30G7.2	Ensembl	626	chrX	-	46185358	46187080	GGCTGAACTTCAAAACAAAATCATGTTGGAGAATTAAGTCTCGTTCCCAGATTTAATTTC	intergenic							17.5043	2.4479	3.91249
ASHG19A3A015693	0.0169781	3.34094	down	5	9.98869	5	26.0657	25.0988	24.8486	33.3676	2.37766	3.77172	2.39437	4.82013	4.49473	4.51038	4.52743	noncoding	ENST00000501118	AC010733.1	Ensembl	2828	chr2	+	61159962	61163467	GATACACTGAAATGAAAGTCTCTAAGAGAAAATGTCTTCCTTAGGACAAGAAGGGATAAT	intergenic							27.3452	2.84791	4.58817
ASHG19A3L0000579	0.00223136	2.99867	down	15.551	12.1133	9.88454	49.0364	52.4436	44.2659	52.5145	4.12654	3.99644	3.60332	5.51037	5.36232	5.46364	5.63601	noncoding	chr13:106073699-106106224-	lincRNA-SLC10A2-4	lincRNA	32526	chr13	-	106073699	106106224	GAAAAATCAGCTGAAGGGCACTTGGAAATTCCCTACTCTGACCCAGATAGTCTTTTGATT	intergenic							49.5651	3.90876	5.49308
ASHG19A3A039749	0.00183615	3.92437	down	135.882	161.739	108.473	584.933	560.703	467.471	597.475	7.17342	7.40491	6.9004	9.19496	8.89974	9.22383	9.20962	noncoding	ENST00000431646	RP11-157D23.1	Ensembl	880	chrX	-	39226538	39251028	AAAGATCTTCAAACCTGGAAGGCTTGCTTCAAACCCCAGCTCTACTCCAACTACAGGATT	intergenic							552.645	7.15958	9.13204
ASHG19A3A009462	0.000721404	2.53808	down	181.857	159.933	138.935	454.657	411.89	378.716	472.455	7.56806	7.39108	7.23811	8.83081	8.57615	8.8315	8.73281	noncoding	AK024617		misc_RNA	1862	chr17	+	37710439	37712286	TATAGAAGTAGTATTGTGAGGGGGATCTTGGGTCTTCCAGGCCAGGTGTAAGCAAATGTA	intergenic							429.429	7.39908	8.74282
ASHG19A3L0000231	0.00672311	2.63418	down	19.4931	11.842	20.383	51.7147	52.6985	57.1945	73.6841	4.45347	3.97149	4.59504	6.01619	5.74383	5.54773	5.64167	noncoding	DB068425	lincRNA-NEBL-1	lincRNA	536	chr10	-	21250680	21661879	GCCTGAAGCAGCAAAGTGAATTGCAGAGTCAGGTCAAGTACAAAAGAGATTTTGAAGAAA	intron sense-overlapping	NM_001177483	C10orf113	putative uncharacterized protein C10orf113	-	21414691	21435488	58.8229	4.34	5.73736
ASHG19A3L0000231	0.00672311	2.63418	down	19.4931	11.842	20.383	51.7147	52.6985	57.1945	73.6841	4.45347	3.97149	4.59504	6.01619	5.74383	5.54773	5.64167	noncoding	DB068425	lincRNA-NEBL-1	lincRNA	536	chr10	-	21250680	21661879	GCCTGAAGCAGCAAAGTGAATTGCAGAGTCAGGTCAAGTACAAAAGAGATTTTGAAGAAA	intron sense-overlapping	NM_001010896	C10orf113	putative uncharacterized protein C10orf113	-	21414691	21435488	58.8229	4.34	5.73736
ASHG19A3L0000231	0.00672311	2.63418	down	19.4931	11.842	20.383	51.7147	52.6985	57.1945	73.6841	4.45347	3.97149	4.59504	6.01619	5.74383	5.54773	5.64167	noncoding	DB068425	lincRNA-NEBL-1	lincRNA	536	chr10	-	21250680	21661879	GCCTGAAGCAGCAAAGTGAATTGCAGAGTCAGGTCAAGTACAAAAGAGATTTTGAAGAAA	exon sense-overlapping	NM_001173484	NEBL	nebulette isoform 3	-	21068902	21463116	58.8229	4.34	5.73736
ASHG19A3L0000231	0.00672311	2.63418	down	19.4931	11.842	20.383	51.7147	52.6985	57.1945	73.6841	4.45347	3.97149	4.59504	6.01619	5.74383	5.54773	5.64167	noncoding	DB068425	lincRNA-NEBL-1	lincRNA	536	chr10	-	21250680	21661879	GCCTGAAGCAGCAAAGTGAATTGCAGAGTCAGGTCAAGTACAAAAGAGATTTTGAAGAAA	exon sense-overlapping	NM_213569	NEBL	nebulette isoform 2	-	21068902	21463116	58.8229	4.34	5.73736
ASHG19A3A010088	4.67951e-05	3.63612	down	20.8248	18.5641	20.135	101.252	81.527	88.0857	95.8208	4.54576	4.51499	4.57814	6.40487	6.3797	6.5505	6.29971	noncoding	ENST00000441225	RP11-739N20.1	Ensembl	218	chr1	-	204336926	204346793	AAAGTCAACCAGCTGGGTGCACCCTGGAACAAAGTCACCCATCCAGAGTGGACACACCTC	intergenic							91.6714	4.5463	6.40869
ASHG19A3A051792	0.00197348	2.89995	down	423.178	598.641	436.947	1341.4	1286.9	1153.24	1404.89	8.7162	9.1628	8.78942	10.489	10.2726	10.4876	10.4528	noncoding	uc001yjz.1	AK094562	UCSC_knowngene	2638	chr14	+	101536247	101539271	AGGATTCAGAGAACCCCCAAATGTCAGGGCTGCTCCCTTCTTGTCCTGCCTCTCTGCTCA	intergenic							1296.61	8.88947	10.4255
ASHG19A3A034176	0.0201951	3.04746	down	5	5.11323	7.34822	19.5011	20.0454	20.4136	27.7771	2.37766	2.32654	3.21587	4.53644	4.19214	4.06297	4.19897	noncoding	ENST00000366310	AC008080.2	Ensembl	309	chr7	+	33847392	33847706	AGTGGGTGTTTAGGAGGTTTTCAAGCTGGGCCCAAAGTCCAACTTGGGTAAGACCACCTG	intergenic							21.9343	2.64003	4.24763
ASHG19A3L0002957	0.00649407	2.04482	down	28.1995	41.4437	24.7376	82.3039	63.1568	78.8116	86.8477	4.9805	5.5563	4.85519	6.26133	6.21635	6.24996	5.92292	noncoding	chr17:8905860-8924601+	lincRNA-NTN1	lincRNA	18742	chr17	+	8905860	8924601	AAGATGACCAAAGGATGCTGTCACTGTCCTCAGTCTTTTTATTGGGGCGATGGAGAATGA	intergenic							77.78	5.13067	6.16264
ASHG19A3L0001126	6.91041e-05	5.77516	down	77.6365	95.4736	79.737	518.586	488.443	507.264	576.317	6.41135	6.69097	6.4787	9.14344	9.03259	9.04713	9.00432	noncoding	DB027866	lincRNA-SDPR-2	lincRNA	595	chr2	+	192557927	192573896	GTAGACTCAAGTTAATGTGAGTTATGTGATGCCTGTCTGTCATTGGATGAAGATCTACAC	intergenic							522.653	6.52701	9.05687
ASHG19A3L0001825	0.00210054	4.89093	down	5	5.55152	8.54772	40.089	39.7521	34.977	37.5588	2.37766	2.63673	3.40582	5.00276	5.00665	5.15757	5.22041	noncoding	chr6:83087506-83099056-	lincRNA-TPBG-1	lincRNA	11551	chr6	-	83087506	83099056	TATTTTGTCAGTCAAGGACTACTCCAGCTCTGATACTATCAGAAAACAATTAGTGGCCCT	intergenic							38.0942	2.80674	5.09685
ASHG19A3L0002094	0.000209445	25.0044	down	5	5.51898	8.19641	191.395	179.928	166.913	175.111	2.37766	2.58345	3.34968	7.31933	7.34103	7.50899	7.48814	noncoding	BP432371	lincRNA-SNTG1	lincRNA	377	chr8	+	50149754	50150129	CACTTCTCTTCCAAGGGCTTTGTAAGCACAAACGTTATTTAGTGCTTTAAATAAGTATAG	intergenic							178.337	2.77026	7.41437
ASHG19A3L0002968	0.0105122	2.848	down	33.6595	65.5384	34.3387	186.819	122.258	134.167	135.342	5.2317	6.1724	5.30775	6.93335	7.01244	7.47295	6.90354	noncoding	chr2:202788106-202795396-	lincRNA-CDK15-2	lincRNA	7291	chr2	-	202788106	202795396	TAGGTCTTCTGGTCATGATGAACGTCTCACTTGGTCTTTTCTTCTCTGTATTGCTGTGGG	intergenic							144.647	5.57062	7.08057
ASHG19A3L0002679	0.0136323	2.23601	down	9.20048	8.15703	13.7123	29.4177	30.4347	33.9795	33.5979	3.40729	3.55175	4.04291	4.83108	4.96356	4.6955	4.82284	noncoding	DB344658	lincRNA-SH2D4A-1	lincRNA	568	chr8	+	18899540	18900108	TAGCAAAGTAGGGTTTTTGTGTTTTGTTTTTCAATAAAGTTGACCATGTCTGGATACCAG	intergenic							31.8575	3.66732	4.82825
ASHG19A3L0000828	0.00496261	3.99183	down	5	5.55494	5	33.8327	24.0784	16.9137	29.0275	2.37766	2.64415	2.39437	4.60981	3.89744	4.90246	4.46672	noncoding	BI835799	lincRNA-TLE3-2	lincRNA	802	chr15	-	70827275	70828070	CCTTTATGCAGTCTGTCCATTCATGATTTCAATGCTTATAAGCATATCGTAAAGTTGAGA	intergenic							25.9631	2.47206	4.46911
ASHG19A3A023910	1.13688e-05	9.58563	down	19.2788	13.9158	18.1755	197.698	203.991	191.542	214.858	4.43755	4.15965	4.43182	7.63168	7.54978	7.55808	7.67598	noncoding	ENST00000504402	RP11-367J11.3	Ensembl	292	chr4	-	7096297	7105056	GCCTCAGCCAAGTGAAATGGGAATCAGGACCATTACAAAGAAATTCAATTAAAATAAAAG	intergenic							202.022	4.34301	7.60388
ASHG19A3A021585	0.00346966	2.49096	down	5.80936	6.72619	8.10851	22.7866	27.5605	24.8352	27.6165	2.85577	3.35223	3.33816	4.52567	4.49398	4.30236	4.673	noncoding	ENST00000509201	RP11-93K22.6	Ensembl	466	chr3	-	129672947	129688137	ATTGGGGAAGTGACCCAAAGTCTCATGTGTCTCTGGGAGATAAATCAAGATCAAGGCTAG	intergenic							25.6997	3.18205	4.49875
ASHG19A3A047038	0.000237547	3.66403	down	12.4433	12.4892	10.2281	57.2861	56.4506	57.8828	56.4111	3.81571	4.03095	3.64662	5.61691	5.75847	5.69306	5.74965	noncoding	ENST00000498979	AP003395.1	Ensembl	2471	chr11	+	119252534	119371306	TTATTTTTTCTCATTTTCACAATAATCTATTCTACATGGGGGAAACTGAGGCTCAGAGAC	intronic antisense	NM_006288	THY1	thy-1 membrane glycoprotein preproprotein	-	119288654	119294246	57.0077	3.83109	5.70452
ASHG19A3A047038	0.000237547	3.66403	down	12.4433	12.4892	10.2281	57.2861	56.4506	57.8828	56.4111	3.81571	4.03095	3.64662	5.61691	5.75847	5.69306	5.74965	noncoding	ENST00000498979	AP003395.1	Ensembl	2471	chr11	+	119252534	119371306	TTATTTTTTCTCATTTTCACAATAATCTATTCTACATGGGGGAAACTGAGGCTCAGAGAC	bidirectional	NM_004205	USP2	ubiquitin carboxyl-terminal hydrolase 2 isoform	-	119225924	119252436	57.0077	3.83109	5.70452
ASHG19A3A013723	3.64614e-05	2.77925	down	34.1061	35.3201	35.1795	112.168	118.164	121.38	118.483	5.25098	5.34562	5.34143	6.7328	6.86419	6.69928	6.85322	noncoding	ENST00000449995	AC016734.3	Ensembl	1334	chr2	-	63869588	63870922	AACAGAGAAGTGGGTGAAATGGTCTCTAGAGACATGTTAGAAAGCTTTTTGTACTTAATT	intergenic							117.549	5.31268	6.78737
ASHG19A3A014509	0.0145471	2.02709	down	45.0297	56.1949	65.6105	129.919	116.573	129.692	150.953	5.6376	5.96458	6.20056	7.10016	6.96096	6.91825	6.83525	noncoding	uc002tyw.2	BC032407	UCSC_knowngene	1745	chr2	-	156877047	157111432	ATTTGGTATCAGTACCCTCAGTAAATCAGAGTTGCTGTGACCTGGGCTTTGATGTAAGGG	intergenic							131.784	5.93425	6.95366
ASHG19A3A045221	0.00381868	4.19478	down	13.2923	9.89547	6.53957	60.9419	54.0669	48.6016	56.9672	3.9109	3.76162	3.07988	5.63448	5.50137	5.7907	5.68437	noncoding	uc001nng.1	AX746988	UCSC_knowngene	2603	chr11	-	58701115	58825925	ATGGTGAGATCAGCAGCATCTCTAGGACCCTTCTGATTGACATGAAGTCACCATCAAGTA	intronic antisense	NM_080661	GLYATL1	glycine N-acyltransferase-like protein 1 isoform	+	58710721	58724516	55.1444	3.58414	5.65273
ASHG19A3L0001686	0.000345221	2.59611	down	405.359	466.214	454.479	1115.53	1027.33	1007.57	1170.67	8.65321	8.83548	8.84306	10.2184	10.0674	10.2054	10.1232	noncoding	AW452601	lincRNA-MTX3	lincRNA	524	chr5	-	79307192	79307717	AGCTGAACAAATCAGAGAATGATTTTCCTTCCCTCTTGTGATTGCTCCCCAGTATCCCTT	intergenic							1080.27	8.77725	10.1536
ASHG19A3L0001491	0.0330283	2.45264	down	19.9345	40.3899	15.3427	79.9041	71.3954	61.9486	71.0226	4.48246	5.52186	4.20409	5.95857	5.8602	6.20426	6.09886	noncoding	chr4:35754355-35766755+	lincRNA-ARAP2-2	lincRNA	12401	chr4	+	35754355	35766755	CACACATTCCTTTTACAAATGGTGATATAATTTGCATATCCTTCTGTGCCTGGCTTTTTT	intergenic							71.0677	4.73614	6.03047
ASHG19A3A024766	0.0184235	2.79762	down	8.38237	13.1435	6.47654	41.9504	32.9028	28.477	37.0543	3.27139	4.09143	3.06884	4.98415	4.69942	5.22642	4.93571	noncoding	ENST00000511951	RP11-371F15.3	Ensembl	282	chr4	-	139741110	139933800	GTCTTTTCCACACCTGGGAAGATGTGGGTATAGGCCACTATGTGTTTTCCTTTCAAAATG	intergenic							35.0961	3.47722	4.96142
ASHG19A3A019104	0.000672145	2.18776	down	37.4702	42.2713	52.5247	125.491	117.706	104.249	112.121	5.37842	5.58676	5.89587	6.64579	6.63309	6.87241	6.84793	noncoding	uc002yli.1	AK124194	UCSC_knowngene	2908	chr21	+	25801053	25862621	TAGGATCACCTCTGTCCAGTAGCTGTTATCCAACATCTGCATACTTAGATTTCTGGAGAG	intergenic							114.892	5.62035	6.74981
ASHG19A3A033072	0.000102181	2.84706	down	217.104	245.223	226.759	709.197	618.037	624.442	672.344	7.80747	7.96611	7.8912	9.37648	9.34232	9.51202	9.36011	noncoding	ENST00000440088	AC090421.1	Ensembl	2029	chr7	-	77286976	77325582	TTGCTGTGCTAAAGTGTTCAGGTGTGAAGTGTACTCATGTTTGCAAATCACTTTGAAATA	bidirectional	NM_198467	RSBN1L	round spermatid basic protein 1-like protein	+	77325742	77409120	656.005	7.88826	9.39773
ASHG19A3A023755	1.4043e-05	2.56367	down	125.961	122.325	124.62	357.154	338.855	342.842	345.169	7.06979	7.02714	7.08897	8.3505	8.42191	8.4659	8.44239	noncoding	AK126698		RNAdb	3826	chr3	+	195442310	195446106	CAGTGGGGACCCATTCGGACCCCAAGAGTTGGTATTAGAGATCATTTTAAAGTGAAAACT	intergenic							346.005	7.06197	8.42018
ASHG19A3A028217	0.000355563	2.00684	down	18.2905	17.3134	16.5215	40.5303	43.2775	47.2136	52.0093	4.35843	4.4279	4.30541	5.49496	5.4603	5.17362	5.34647	noncoding	ENST00000512349	CTD-2313F11.2	Ensembl	591	chr5	+	54350255	54350968	TTATGAACACAGCCTTTGTCATTCCTGACCACAGCTTCAATGTGGAGAGGAAACCTCTCT	intergenic							45.7577	4.36391	5.36884
ASHG19A3L0002395	0.000436242	2.63201	down	397.904	404.437	344.491	1032.53	929.61	901.742	984.303	8.62784	8.64753	8.47402	9.95847	9.89265	10.088	9.97801	noncoding	BQ184470	lincRNA-EDEM3	lincRNA	542	chr1	+	184633040	184633560	TGTCCCTTCAAGGCCTCTTCCTCGTCCCAGGTCGAGTCTCCTCCTTGCTGACCAGGCATC	intergenic							962.046	8.58313	9.97929
ASHG19A3A024375	0.000317429	2.50468	down	74.3743	83.7641	59.4913	200.926	187.238	210.983	225.673	6.34825	6.50559	6.06829	7.70562	7.69553	7.57948	7.54737	noncoding	ENST00000505100	CTB-179I1.3	Ensembl	463	chr4	-	78137565	78138028	TTACAGTGCAGACAAGTGGCCCCAGAATAGAAGGTACCTTTTCTAAAAGCTCTACCTCAG	intergenic							206.205	6.30738	7.632
ASHG19A3L0001402	0.000805946	3.43638	down	162.726	186.883	138.221	617.452	559.685	524.497	603.967	7.42137	7.60087	7.23032	9.20794	9.07652	9.30218	9.20701	noncoding	BM699739	lincRNA-FHIT-1	lincRNA	246	chr3	+	59542105	59542351	AGTGTCTTCCATAGTTTGGCATTAAGAATTGCTGCCTGCCTGTCTAAAGTCTTAAAAATA	intergenic							576.4	7.41752	9.19841
ASHG19A3A025301	0.000425271	2.43047	down	344.124	395.222	395.801	874.899	834.108	886.77	949.127	8.43322	8.61677	8.66502	9.90031	9.86243	9.84147	9.80741	noncoding	ENST00000503532	RP11-341G5.1	Ensembl	582	chr4	+	13821733	13978699	GGAGAATTGAAGAAATCTTAAAATGCAAGCATATTAAGCCCTTTTCCCCCAAATCACTTA	intergenic							886.226	8.57167	9.8529
ASHG19A3A047149	0.000218399	3.8055	down	63.7814	72.3816	71.3333	295.564	267.862	282.64	331.675	6.12185	6.30779	6.31722	8.29507	8.14342	8.16955	8.10012	noncoding	G43210		misc_RNA	283	chr11	+	130736198	130736481	TGAGTTACCCAATCAAGCCCTTTTACCTCCTTAAGATGGCAGATTAGAAGACCCTCTTCC	intergenic							294.435	6.24895	8.17704
ASHG19A3A027530	0.0352279	2.36952	down	7.62696	5.74628	13.3103	28.659	26.2961	30.5619	24.7884	3.1504	2.93746	4.00005	4.36797	4.80706	4.65639	4.59749	noncoding	ENST00000340585	CTD-2050E21.1	Ensembl	560	chr5	-	142869419	142910915	AAGCAAGATAAAGAGGTTTGGGATCTTTTCTGGGATTTTGCTGAACAGGGCGTGGTGACA	intergenic							27.5764	3.36264	4.60723
ASHG19A3L0001198	6.53863e-05	5.49953	down	136.96	146.193	123.052	808.337	744.311	721.35	790.335	7.18522	7.26873	7.07198	9.61545	9.56624	9.72039	9.6364	noncoding	BE669623	lincRNA-CCDC85A-1	lincRNA	540	chr2	-	57541455	58113368	CCAGGTTTATTGTAAAACCACTGATCCCTTCATTTGAGCTCGACTTCCCTGCACTTTTTT	intergenic							766.083	7.17531	9.63462
ASHG19A3L0002074	0.00485062	2.98455	down	5.18002	5.10647	7.55084	23.1172	23.6699	20.9369	25.3096	2.7423	2.32627	3.24478	4.39835	4.2309	4.32515	4.44011	noncoding	chr8:29836333-29857783+	lincRNA-TMEM66-3	lincRNA	21451	chr8	+	29836333	29857783	AGAGAAATTCAGATCGAACACTGAAAAGGCTTCAAGGCTCTGGGGAAGACCTGAGTTTAT	intergenic							23.2584	2.77112	4.34863
ASHG19A3L0002261	0.00983984	2.17485	down	112.457	160.205	100.867	321.031	297.073	260.644	283.672	6.91475	7.39241	6.79748	8.05969	8.01791	8.29788	8.24771	noncoding	BF509048	lincRNA-FAM9C-3	lincRNA	740	chrX	-	13062942	13158595	GATACCTTCATTCCTGGAGACCTGGTATCTTGTCCACTCCCGAGTCCTTGCTTCCTTCAC	intergenic							290.605	7.03488	8.1558
ASHG19A3A014272	0.0135051	2.32362	down	89.7416	123.475	64.3418	220.513	253.295	211.478	247.344	6.60476	7.03956	6.17447	7.85193	7.7	7.72055	8.01805	noncoding	ENST00000441053	AC067960.1	Ensembl	812	chr2	-	121839012	121846302	AATATCCCTTTCCCATTCAGCAACTGTGCAACACCTGACTTCAGAAACAGACGTCTAGAG	intergenic							233.157	6.60626	7.82263
ASHG19A3L0003099	0.0353193	2.06758	down	43.6321	71.8536	39.9836	144.443	126.8	96.5907	128.089	5.59147	6.29768	5.52053	6.84542	6.51812	7.0788	6.96233	noncoding	BQ303919	lincRNA-RGNEF-3	lincRNA	549	chr5	-	72797022	73644097	CCTATTCCTATTCATCCTTTAAAATCTTATTCAAGTCATTACCTCCTGTTTGCCTTTCCT	intron sense-overlapping	NM_023039	ANKRA2	ankyrin repeat family A protein 2	-	72848024	72861511	123.981	5.80322	6.85117
ASHG19A3L0003099	0.0353193	2.06758	down	43.6321	71.8536	39.9836	144.443	126.8	96.5907	128.089	5.59147	6.29768	5.52053	6.84542	6.51812	7.0788	6.96233	noncoding	BQ303919	lincRNA-RGNEF-3	lincRNA	549	chr5	-	72797022	73644097	CCTATTCCTATTCATCCTTTAAAATCTTATTCAAGTCATTACCTCCTGTTTGCCTTTCCT	intronic antisense	NM_001080479	RGNEF	rho-guanine nucleotide exchange factor isoform	+	72921982	73237818	123.981	5.80322	6.85117
ASHG19A3L0003099	0.0353193	2.06758	down	43.6321	71.8536	39.9836	144.443	126.8	96.5907	128.089	5.59147	6.29768	5.52053	6.84542	6.51812	7.0788	6.96233	noncoding	BQ303919	lincRNA-RGNEF-3	lincRNA	549	chr5	-	72797022	73644097	CCTATTCCTATTCATCCTTTAAAATCTTATTCAAGTCATTACCTCCTGTTTGCCTTTCCT	intronic antisense	NM_032175	UTP15	U3 small nucleolar RNA-associated protein 15	+	72861597	72877794	123.981	5.80322	6.85117
ASHG19A3L0003099	0.0353193	2.06758	down	43.6321	71.8536	39.9836	144.443	126.8	96.5907	128.089	5.59147	6.29768	5.52053	6.84542	6.51812	7.0788	6.96233	noncoding	BQ303919	lincRNA-RGNEF-3	lincRNA	549	chr5	-	72797022	73644097	CCTATTCCTATTCATCCTTTAAAATCTTATTCAAGTCATTACCTCCTGTTTGCCTTTCCT	intronic antisense	NM_001177693	RGNEF	rho-guanine nucleotide exchange factor isoform	+	72921982	73237818	123.981	5.80322	6.85117
ASHG19A3L0003099	0.0353193	2.06758	down	43.6321	71.8536	39.9836	144.443	126.8	96.5907	128.089	5.59147	6.29768	5.52053	6.84542	6.51812	7.0788	6.96233	noncoding	BQ303919	lincRNA-RGNEF-3	lincRNA	549	chr5	-	72797022	73644097	CCTATTCCTATTCATCCTTTAAAATCTTATTCAAGTCATTACCTCCTGTTTGCCTTTCCT	intronic antisense	NM_001037637	BTF3	transcription factor BTF3 isoform A	+	72794249	72801448	123.981	5.80322	6.85117
ASHG19A3L0003099	0.0353193	2.06758	down	43.6321	71.8536	39.9836	144.443	126.8	96.5907	128.089	5.59147	6.29768	5.52053	6.84542	6.51812	7.0788	6.96233	noncoding	BQ303919	lincRNA-RGNEF-3	lincRNA	549	chr5	-	72797022	73644097	CCTATTCCTATTCATCCTTTAAAATCTTATTCAAGTCATTACCTCCTGTTTGCCTTTCCT	intronic antisense	NM_001207	BTF3	transcription factor BTF3 isoform B	+	72794249	72801448	123.981	5.80322	6.85117
ASHG19A3L0000441	0.0101798	5.09828	down	15.2502	45.6575	19.2251	177.787	135.435	123.598	152.886	4.10033	5.68679	4.51354	7.12136	6.88969	7.3996	7.05694	noncoding	CR738571	lincRNA-NCOR2	lincRNA	504	chr12	-	125108953	125167838	AGCAGACTTGGGTGACACCTTTTGTTTCTCTGTGTTCACTTTCACCATCACCTACTCTTC	intergenic							147.427	4.76689	7.1169
ASHG19A3A013559	0.00474293	8.3075	down	5	7.12311	11.5375	77.0176	83.9806	74.21	95.5144	2.37766	3.41139	3.81358	6.40037	6.13317	6.14594	6.34169	noncoding	ENST00000434020	AC093609.1	Ensembl	952	chr2	-	43324883	43329829	AGATGGCATGTTCCTAAAACAGAGGAAGTAGAACCGAATAAAGCGAAATCCAACTTCCCA	intergenic							82.6807	3.20088	6.25529
ASHG19A3A021633	0.0338455	2.65357	down	19.9306	51.7858	32.9857	133.458	92.5229	83.3089	114.727	4.48223	5.85671	5.25358	6.68193	6.29495	6.95964	6.48523	noncoding	ENST00000466206	RP11-657O9.1	Ensembl	562	chr3	-	135074908	135158671	TGAAGTTTTCTGACTCTATCTTTCTTTTCCCGTGGCCACTGTTACCTCTCCAGAACAGAC	intergenic							106.004	5.19751	6.60544
ASHG19A3L0002592	0.00543782	2.34916	down	21.2458	24.4553	19.4944	80.2257	64.4011	58.397	56.3631	4.57209	4.85888	4.53368	5.61572	5.77218	6.21034	5.94986	noncoding	BM728564	lincRNA-HHAT	lincRNA	568	chr1	+	210425878	210426445	TACAGGAAGGAAATGTGACAGCACAAGCCGTTCGCCATCACCCAGGAGCTGTCAGCAGCT	intergenic							64.8467	4.65488	5.88702
ASHG19A3L0003214	0.000471804	2.05916	down	328.006	360.477	332.757	731.697	637.839	644.016	742.079	8.36826	8.49224	8.42566	9.52448	9.38766	9.56268	9.4083	noncoding	chr8:129188666-129196194-	lincRNA-MYC-5	lincRNA	7529	chr8	-	129188666	129196194	ATTAAGAATGTGAATTAACTTCCTCCTTCTCTGGGCTTCTACTTGGCAGTCTGAGACAGA	intergenic							688.908	8.42872	9.47078
ASHG19A3L0001377	0.0276985	3.44317	down	7.10141	5.13386	5	15.6877	49.438	18.6751	22.3666	3.07459	2.32737	2.39437	4.20258	4.05437	3.72537	5.54773	noncoding	DB342819	lincRNA-GOLGA4	lincRNA	579	chr3	-	37432860	37433435	CTTCTTAAAAGAGATGCCCAAGGTGCACAAGGAAGCTGTGTCTTTGATATGTTTCAAGGT	intergenic							26.5418	2.59878	4.38251
ASHG19A3A027790	8.3464e-05	2.03063	down	91.5969	96.1004	85.3086	203.743	193.404	206.948	234.277	6.63309	6.70045	6.57375	7.76614	7.66624	7.60341	7.59497	noncoding	BC037953		misc_RNA	1378	chr5	-	179345911	179347229	GCCCTGTTCTCACTGACTGTGGAATATACGTTTGAAGTGAACACTTGCCATTTTTCCACG	intergenic							209.593	6.63577	7.65769
ASHG19A3A013748	0.00111273	3.3596	down	304.266	365.89	240.674	1031.13	916.92	942.834	1000.24	8.26285	8.51205	7.97304	9.98553	9.96537	10.0844	9.95509	noncoding	ENST00000455212	AC007386.3	Ensembl	582	chr2	-	65187186	65187768	ATTATTCTTCCTGGTAAAAAAGTTCCCGTTTCTACCCAAAAGGCCAATACAAAGTTTTCA	intergenic							972.781	8.24932	9.99761
ASHG19A3L0000592	2.23474e-05	5.09634	down	33.9018	29.0191	31.7073	203.353	191.219	159.486	216.891	5.24149	5.08376	5.20076	7.64618	7.27572	7.5995	7.5778	noncoding	BE780050	lincRNA-MPHOSPH8-2	lincRNA	727	chr13	+	20198359	20199082	CCGTTACATATTACTGGAAACAAATACAGTGGTCCTCCAACTGCAGATCATTATGCGTAT	intergenic							192.738	5.17534	7.5248
ASHG19A3A035126	0.0345696	2.52687	down	13.877	16.215	8.13356	51.282	42.8564	29.9272	44.0513	3.96955	4.34498	3.34061	5.24521	4.77607	5.53671	5.33159	noncoding	ENST00000435996	AC009784.3	Ensembl	733	chr7	+	135777704	136122174	GGAAGTCCTTGCAGCCATCCAATAGAGTCAGAAGACTTTGGATTTTGGAGTCTGTGAGAT	intergenic							42.0292	3.88505	5.2224
ASHG19A3L0000688	0.0110194	2.1661	down	7.67855	6.38946	7.83391	31.2658	20.3711	27.525	17.2997	3.15866	3.29614	3.29158	3.79769	4.64626	4.78756	4.22406	noncoding	chr13:86214299-86278949+	lincRNA-SLITRK6-5	lincRNA	64651	chr13	+	86214299	86278949	GTGCATTACAGGTATCTCGTGTCTCTAATTACTCAGCATTTGGGGCAGGGTTCTAAAGAG	intergenic							24.1154	3.24879	4.36389
ASHG19A3A026927	0.00212059	2.12914	down	19.8974	16.5711	21.2406	50.5133	48.8183	53.4822	58.5636	4.48027	4.37291	4.64738	5.67239	5.64737	5.51336	5.52871	noncoding	ENST00000512573	CTC-347C20.2	Ensembl	594	chr5	-	71869946	71956496	TAGTTGATAACGTCTTCCAGGAGACCTACGGCCATCCTACTGATATGAACCAGATCATAC	intergenic							52.8444	4.50019	5.59046
ASHG19A3L0000839	0.0139056	2.01192	down	17.7919	18.1098	11.547	46.5528	37.2087	36.4835	44.9718	4.31873	4.48391	3.8149	5.27589	5.07313	5.38485	5.1238	noncoding	DB297898	lincRNA-ANKRD34C-1	lincRNA	528	chr15	+	79518905	79519430	ATGCCAAGAGCTTGCTTTCCTGCTGAAGAAAATGTCAGGCTCTAATAATATTCCATTATT	intergenic							41.3042	4.20585	5.21442
ASHG19A3A025665	3.73649e-05	2.65741	down	100.701	113.113	126.328	353.993	325.172	321.883	309.675	6.76898	6.91863	7.1078	8.19204	8.33834	8.45402	8.3829	noncoding	ENST00000502790	RP11-692D12.1	Ensembl	685	chr4	+	74124925	74183670	ATATTTTAACCTGATCTGCCTGATTCTGGAGCCTGCACCATCATTCCATTGTCGTGCTTG	bidirectional	NM_032217	ANKRD17	ankyrin repeat domain-containing protein 17	-	73940501	74124502	327.681	6.9318	8.34182
ASHG19A3A025665	3.73649e-05	2.65741	down	100.701	113.113	126.328	353.993	325.172	321.883	309.675	6.76898	6.91863	7.1078	8.19204	8.33834	8.45402	8.3829	noncoding	ENST00000502790	RP11-692D12.1	Ensembl	685	chr4	+	74124925	74183670	ATATTTTAACCTGATCTGCCTGATTCTGGAGCCTGCACCATCATTCCATTGTCGTGCTTG	bidirectional	NM_198889	ANKRD17	ankyrin repeat domain-containing protein 17	-	73940501	74124502	327.681	6.9318	8.34182
ASHG19A3A046276	0.00244415	3.51747	down	46.2106	56.0697	38.8988	197.023	203.853	158.249	209.127	5.67415	5.96145	5.48619	7.59375	7.26676	7.55201	7.67471	noncoding	ENST00000421994	RP4-633H17.2	Ensembl	653	chr1	-	55838380	55839033	ATGCCCATTGTTCTTGAACTGGTACCTCTAAAATGCTTTGAAAATTGAGCAACGTCTATA	intergenic							192.063	5.70727	7.52181
ASHG19A3A051126	5.16058e-05	7.72092	down	23.0104	18.6988	24.5707	216.883	188.749	201.497	220.266	4.69405	4.52325	4.84556	7.66932	7.62399	7.69365	7.55862	noncoding	uc001yfx.2	C14orf64	UCSC_knowngene	2166	chr14	-	98399398	98444461	TGTGGACACACACAGCCAGTTTTCCTGCTGGTTTACCAGGTAAAATCAAAAGACCCTCAT	intergenic							206.848	4.68762	7.63639
ASHG19A3L0000344	0.00164802	2.74653	down	5	5.46657	5	16.8921	17.6939	14.0294	20.7734	2.37766	2.49643	2.39437	4.08423	3.5918	3.84151	4.00418	noncoding	chr11:13920449-13932999-	lincRNA-FAR1	lincRNA	12551	chr11	-	13920449	13932999	GAGGGCAAGGGTTTACCACCCATAAAAAATGCATGTCTCTGTGTGAACAGAAATTCACAT	intergenic							17.3472	2.42282	3.88043
ASHG19A3L0003538	0.00578805	3.74181	down	5	5.5226	5	38.0867	20.3373	22.3343	17.2972	2.37766	2.58906	2.39437	3.79737	4.32948	5.08197	4.22089	noncoding	chr20:541348-562112-	lincRNA-CSNK2A1	lincRNA	20765	chr20	-	541348	562112	TTTTTAATCAGACATCACCCAAGATCAGTAAGTCAGCAGTTGTGGGTTCTGCAGGAGAGG	intergenic							24.5139	2.45369	4.35743
ASHG19A3L0000456	0.0102322	2.14264	down	12.3077	11.213	8.09413	31.2202	33.2356	27.7696	31.3389	3.80036	3.90604	3.33661	4.72681	4.66184	4.78407	4.94885	noncoding	FN143838	lincRNA-MMP17	lincRNA	91	chr12	+	132296541	132296622	TAGAGGGACTCAGGAAGCTGTCTTCCTGGGCTCCACAGTTGGGATTGAGGGAGAGCAAGA	intergenic							30.8911	3.681	4.78039
ASHG19A3A032420	0.0269654	4.02359	down	62.4376	105.77	40.3663	326.573	352.928	179.413	347.665	6.09209	6.82652	5.53567	8.36285	7.45257	8.32504	8.49918	noncoding	ENST00000415726	RP11-336K24.5	Ensembl	401	chr1	+	155961180	155971578	CTTCCTGTCCACTGCCAGAGAGTGGTGCCACAATTCCAAAAATGAAAGGAAAGTAAAAGA	intergenic							301.645	6.15143	8.15991
ASHG19A3A023141	0.00188302	2.77938	down	8.55743	7.56855	5.18858	29.1294	26.9048	30.8491	28.5103	3.30503	3.47744	2.82982	4.58092	4.82035	4.6804	4.63374	noncoding	ENST00000511512	RP11-71E19.1	Ensembl	501	chr3	+	125985638	126010122	AACCTTAAGACCAGAGCAGCCCACGATATTTTTTAATGAGGGCAAAAATAGAAGACTTGC	intergenic							28.8484	3.20409	4.67885
ASHG19A3L0000229	0.0346143	3.92214	down	5	20.6227	14.3249	67.9083	55.1016	46.6364	56.3971	2.37766	4.64703	4.10372	5.61655	5.441	5.9514	5.71551	noncoding	EB386294	lincRNA-PLXDC2-1	lincRNA	795	chr10	-	20678507	20679302	CCTGGAATTCCATTTCTTTTCCATGCCACGTAACTGCATCCTGATGCCCTGATGATTTTG	intergenic							56.5109	3.70947	5.68111
ASHG19A3A032076	0.000137402	2.51823	down	43.4025	42.4778	39.6848	136.497	109.341	124.927	136.447	5.58497	5.59327	5.51083	6.94638	6.90643	6.9926	6.73632	noncoding	uc003qdd.2	AF086187	UCSC_knowngene	990	chr6	+	132455117	132490502	TATTATTTAACCCACTAGAACCTGTGACTGCATCAGCTTTATATCCTGGACCTCAGCCTG	intergenic							126.803	5.56302	6.89543
ASHG19A3L0001530	3.91291e-05	2.74437	down	948.102	853.882	811.748	2101.18	2131.69	2034.3	2237.08	9.78954	9.65434	9.63026	11.1713	11.0943	11.1386	11.1873	noncoding	AK056959	lincRNA-C4orf26	lincRNA	1122	chr4	+	76439682	76472540	AACTATTTGCTGAGTGTCACTGTGCCAAGCCCTGGGGCTAAAACTAATCAAGATTTGGTT	bidirectional	NM_001009922	RCHY1	RING finger and CHY zinc finger	-	76404246	76439640	2126.06	9.69138	11.1479
ASHG19A3L0001530	3.91291e-05	2.74437	down	948.102	853.882	811.748	2101.18	2131.69	2034.3	2237.08	9.78954	9.65434	9.63026	11.1713	11.0943	11.1386	11.1873	noncoding	AK056959	lincRNA-C4orf26	lincRNA	1122	chr4	+	76439682	76472540	AACTATTTGCTGAGTGTCACTGTGCCAAGCCCTGGGGCTAAAACTAATCAAGATTTGGTT	bidirectional	NM_015436	RCHY1	RING finger and CHY zinc finger	-	76404246	76439640	2126.06	9.69138	11.1479
ASHG19A3L0001530	3.91291e-05	2.74437	down	948.102	853.882	811.748	2101.18	2131.69	2034.3	2237.08	9.78954	9.65434	9.63026	11.1713	11.0943	11.1386	11.1873	noncoding	AK056959	lincRNA-C4orf26	lincRNA	1122	chr4	+	76439682	76472540	AACTATTTGCTGAGTGTCACTGTGCCAAGCCCTGGGGCTAAAACTAATCAAGATTTGGTT	exon sense-overlapping	NM_144721	THAP6	THAP domain-containing protein 6	+	76439653	76455236	2126.06	9.69138	11.1479
ASHG19A3L0001530	3.91291e-05	2.74437	down	948.102	853.882	811.748	2101.18	2131.69	2034.3	2237.08	9.78954	9.65434	9.63026	11.1713	11.0943	11.1386	11.1873	noncoding	AK056959	lincRNA-C4orf26	lincRNA	1122	chr4	+	76439682	76472540	AACTATTTGCTGAGTGTCACTGTGCCAAGCCCTGGGGCTAAAACTAATCAAGATTTGGTT	bidirectional	NM_001008925	RCHY1	RING finger and CHY zinc finger	-	76404246	76439640	2126.06	9.69138	11.1479
ASHG19A3L0001498	0.0187172	2.54081	down	9.23339	22.9329	13.5631	73.1854	41.3308	45.6494	35.3113	3.41096	4.77548	4.02662	4.91016	5.40842	6.06519	5.28146	noncoding	chr4:53257568-53279668-	lincRNA-SPATA18-1	lincRNA	22101	chr4	-	53257568	53279668	CCAATTCCTGTGGAAATTGTTTTCATGTCTTGAGACAACAGCACATTCTGCCTCTGCTCT	intergenic							48.8692	4.07102	5.41631
ASHG19A3L0003077	0.019271	3.65042	down	5	17.4574	11.034	56.7884	40.0465	46.3997	43.3019	2.37766	4.43814	3.75435	5.22027	5.43278	5.68129	5.23144	noncoding	chr9:92444412-92448012-	lincRNA-GADD45G-2	lincRNA	3601	chr9	-	92444412	92448012	AAAGGATGTCTTTCTTCTGGTTTGGTAAGAGAGAGACCTTCTCAGCAGCCATCAGGATCA	intergenic							46.6341	3.52338	5.39145
ASHG19A3A036393	0.000435974	2.32128	down	58.5895	65.1256	54.4555	172.062	146.536	153.159	170.469	6.00523	6.16353	5.94689	7.27689	7.21291	7.34658	7.17751	noncoding	uc003wyp.1	CR613267	UCSC_knowngene	2275	chr8	+	17942376	17955126	GATAAGCAGTGAACAACAACAAAAAGACAAACTTCTTCCACCCTGAGGCGTATGTTCTCG	bidirectional	NM_177924	ASAH1	acid ceramidase isoform a preproprotein	-	17913924	17941879	160.557	6.03855	7.25348
ASHG19A3A036393	0.000435974	2.32128	down	58.5895	65.1256	54.4555	172.062	146.536	153.159	170.469	6.00523	6.16353	5.94689	7.27689	7.21291	7.34658	7.17751	noncoding	uc003wyp.1	CR613267	UCSC_knowngene	2275	chr8	+	17942376	17955126	GATAAGCAGTGAACAACAACAAAAAGACAAACTTCTTCCACCCTGAGGCGTATGTTCTCG	natural antisense	NM_001127505	ASAH1	acid ceramidase isoform c	-	17913924	17942507	160.557	6.03855	7.25348
ASHG19A3A036393	0.000435974	2.32128	down	58.5895	65.1256	54.4555	172.062	146.536	153.159	170.469	6.00523	6.16353	5.94689	7.27689	7.21291	7.34658	7.17751	noncoding	uc003wyp.1	CR613267	UCSC_knowngene	2275	chr8	+	17942376	17955126	GATAAGCAGTGAACAACAACAAAAAGACAAACTTCTTCCACCCTGAGGCGTATGTTCTCG	natural antisense	NM_004315	ASAH1	acid ceramidase isoform b	-	17913924	17942507	160.557	6.03855	7.25348
ASHG19A3A048036	2.1387e-05	16.4581	down	12.5953	11.3652	14.5612	255.815	254.368	254.82	281.069	3.83585	3.92282	4.1236	8.04672	7.98301	7.95204	8.02417	noncoding	uc001tvk.1	AK096932	UCSC_knowngene	2088	chr12	-	114182381	114211488	ACAGATAATCATCACTACGAGTATATTGTGTGCCTGCTAAGCACCACACCTGAGATAAGC	intergenic							261.518	3.96076	8.00149
ASHG19A3L0001042	0.00336145	2.3545	down	14.9164	18.9154	18.0681	69.3479	53.8211	45.6145	44.1479	4.07217	4.5373	4.42328	5.24987	5.40706	5.98548	5.67626	noncoding	chr2:118353605-118365655+	lincRNA-DDX18	lincRNA	12051	chr2	+	118353605	118365655	AGCCTCCAATAAATACATATAAGTAAAGTACATTCACTTCACTAGCACTGCCTGCTCATG	intergenic							53.2329	4.34425	5.57967
ASHG19A3A015728	0.00211883	3.92915	down	94.3834	45.5829	52.9965	273.818	268.752	257.256	291.743	6.67961	5.68527	5.90777	8.10338	7.99683	8.05529	8.10491	noncoding	uc002scv.1	CR605149	UCSC_knowngene	1471	chr2	+	64455601	64479960	ATTTCGTAACCTGACTCTCTATAAGAAAAAGTAGGAGAAAGACTGAAGAACCCGAGAGAA	intergenic							272.892	6.09088	8.0651
ASHG19A3L0002350	9.00956e-05	2.42163	down	9.59704	8.44714	11.832	36.4731	37.9464	28.8959	31.7869	3.46617	3.58849	3.84609	4.74829	4.72204	5.01538	5.15255	noncoding	chr4:158983666-159005030-	lincRNA-GRIA2-1	lincRNA	21365	chr4	-	158983666	159005030	TGAGCCCCTTAGCATCTAGAGATCCTTGGCTATTTAAAATTGAAAATGCTGGTGTATATC	intergenic							33.7756	3.63358	4.90957
ASHG19A3L0002229	0.00837814	3.74944	down	6.36907	9.58238	14.0585	47.9917	45.4895	52.1129	52.6991	2.95673	3.72629	4.07779	5.51578	5.60419	5.4279	5.42657	noncoding	chrX:102236694-102253244-	lincRNA-RAB40AL-1	lincRNA	16551	chrX	-	102236694	102253244	AAATGTGGTCCAATCTCAGCACTTTGAGCAAGGCAAGATTCAATGAGTGCAAGTGACTTA	intergenic							49.5733	3.58694	5.49361
ASHG19A3L0000589	0.00395162	2.10279	down	216.936	265.891	221.755	585.315	445.307	444.561	538.182	7.80683	8.07291	7.86218	9.03581	8.82548	9.22486	8.85895	noncoding	chr13:112169174-112181374-	lincRNA-C13orf16-3	lincRNA	12201	chr13	-	112169174	112181374	ATGAAAGCACAAAAGCCTTTGCCTTTTTTGCCTCATTCCTGTTGCTCCCCAGGAAAGAAG	intergenic							503.341	7.91397	8.98627
ASHG19A3A027708	0.00441136	2.32855	down	5	5.70294	6.01602	22.7587	19.197	14.2515	17.3722	2.37766	2.87343	2.98474	3.80407	3.61978	4.29996	4.13501	noncoding	AK074818		misc_RNA	2352	chr5	-	173137442	173146695	TCTTGGAGGCTGAAAGAACACATGGAGAGCAGTGTTTTTCCAGCTTCTGTGTTGGTAAGA	intergenic							18.3949	2.74528	3.96471
ASHG19A3L0003400	0.0148556	2.35878	down	29.3926	43.8179	26.2766	102.85	90.6583	76.1691	107.145	5.04042	5.63104	4.94453	6.57901	6.16631	6.57499	6.45318	noncoding	chr5:148834826-148846630-	lincRNA-IL17B	lincRNA	11805	chr5	-	148834826	148846630	GCAAGAAATATAGGCTAGTTTACCAATAATTGTTTCCCCATTACCCATTGAATCTGTTTC	intergenic							94.2055	5.20533	6.44337
ASHG19A3L0002916	2.96391e-05	5.05773	down	54.5525	59.9588	53.3652	321.497	329.081	307.617	313.983	5.90785	6.04951	5.917	8.21353	8.27172	8.29957	8.40163	noncoding	chr12:89710086-89721197+	lincRNA-DUSP6-1	lincRNA	11112	chr12	+	89710086	89721197	GATGCCCCTGCAAAGATGGTGAAGTGTGGAAAATCAAGTTGCACATGATGTTAAATCATG	intergenic							318.044	5.95812	8.29661
ASHG19A3A052465	1.09634e-06	82.1556	down	5	5.30428	5	411.303	393.062	416.237	481.269	2.37766	2.3341	2.39437	8.8591	8.721	8.67646	8.65942	noncoding	AK055989		misc_RNA	2012	chr15	-	82108948	82110962	TTTGGCCAAGCCTCGTGATCTAATTGGAAGTGTCAGTAGGATTGGACAGATAAGAATACA	intergenic							425.468	2.36871	8.729
ASHG19A3L0002212	0.00213551	2.20091	down	22.9706	8.48602	14.6899	38.8488	40.9037	36.1654	58.7294	4.69086	3.59407	4.1369	5.67626	5.05884	5.11401	5.26574	noncoding	BM920543	lincRNA-SLC24A2-1	lincRNA	1100	chr9	-	19903993	20309074	TTGAATTCAATTAAATTCCCGGCATTTTGGGGGCCCTACTCCACAGGGGAATTGGGAAAA	intergenic							43.6618	4.14061	5.27871
ASHG19A3A040254	0.00198568	2.24706	down	29.2131	32.1977	33.1183	90.2882	91.7274	71.186	96.839	5.03093	5.22397	5.25967	6.4211	6.07646	6.38959	6.4711	noncoding	ENST00000415252	RP1-3D11.2	Ensembl	457	chrX	-	106756212	106789051	AAATACCTGGAAACCTGGAGTCACCTTGCAAAAGACCAACCCCATAATGCTTCAAAGAGG	intergenic							87.5101	5.17153	6.33956
ASHG19A3L0000147	6.69476e-05	5.35841	down	5	6.17062	8.21296	51.528	56.6735	47.9007	34.61	2.37766	3.24709	3.35279	4.87871	5.48029	5.54246	5.75581	noncoding	AA164337	lincRNA-AJAP1-2	lincRNA	585	chr1	-	5423082	5423648	ATCTCATGTCCTTGACAGCATGTATGCTAAGATGGCAGCCATTGCCTTTGCCTTTTCACT	intergenic							47.6781	2.99251	5.41432
ASHG19A3L0002429	0.0195682	2.81556	down	23.7369	45.2436	20.8844	109.214	93.9338	79.5358	110.451	4.73774	5.67599	4.6263	6.62285	6.22952	6.66274	6.51194	noncoding	DA096519	lincRNA-TLE4-2	lincRNA	553	chr9	-	84189582	84190134	ATTTCTTCTGATGTTGTGTGTAGTGACCCATATCCTTCTGCATAAAAGACAGTCGAGAAA	intergenic							98.2835	5.01334	6.50676
ASHG19A3L0000087	0.00797747	3.60119	down	6.57596	19.0658	14.8972	85.74	42.3359	68.8458	47.0867	2.98925	4.54773	4.16261	5.34678	6.02253	6.30779	5.31625	noncoding	chr1:228917027-228938752-	lincRNA-RHOU-6	lincRNA	21726	chr1	-	228917027	228938752	AAGCAGTGACTATCACCAGTGTTCTCGCTCTATTTCACCCGTCAAGTTAAGCACCTTCTT	intergenic							61.0021	3.89986	5.74834
ASHG19A3L0002518	0.0413296	2.07716	down	7.25517	9.23522	8.03323	31.3061	34.3657	18.1251	18.4756	3.09908	3.68482	3.32627	3.9013	4.00611	4.78944	5.00182	noncoding	T50632	lincRNA-MAP1LC3B2-2	lincRNA	290	chr12	+	116863737	116864027	CAATTCTAATATGGAAACATCTAGACAACGCCACCGTGGTCTGTGCAAATGTGCTCCTAG	intergenic							25.5681	3.37006	4.42467
ASHG19A3A036828	0.0215327	2.41848	down	11.5995	26.5806	12.5936	60.7462	38.6823	48.2234	50.9889	3.71919	4.96969	3.92865	5.46307	5.48979	5.78525	5.18166	noncoding	ENST00000507589	AC025370.2	Ensembl	2742	chr8	+	104255772	104258560	TCATCCTAGTTAAGTGATTTGAGGGCAATTACCTTCCATTTGAGGATGCTGCCTGCTCCA	intergenic							49.6602	4.20584	5.47994
ASHG19A3L0000753	0.00682024	5.09376	down	5.62691	12.5382	7.99884	75.8762	52.0732	46.2124	63.1828	2.82018	4.03572	3.32073	5.78707	5.42821	6.12298	5.62551	noncoding	BX113459	lincRNA-FUT8-2	lincRNA	744	chr14	-	66897354	66898101	TGCCATTTGTGTGTTTCATTTTTCCTAGAGGGTTTGCCAAGTGCTCTGTATGATTTATTC	intergenic							59.3361	3.39221	5.74094
ASHG19A3A029675	0.00161792	2.12053	down	50.1998	54.4871	52.0489	130.304	142.668	112.357	141.157	5.78795	5.92114	5.88474	6.99857	6.74025	6.92214	7.13517	noncoding	ENST00000419357	C6orf214	Ensembl	264	chr6	-	30766430	30798436	CATCCTGGCCCCAGAAGATTTTGCGTAGCCTCACCAAGAGAAGAAGTTGGAAAGAAAAAA	intergenic							131.621	5.86461	6.94903
ASHG19A3L0000354	2.04145e-05	8.68883	down	103.57	102.877	92.5407	837.98	939.288	844.811	977.597	6.80695	6.79143	6.67773	9.95066	9.79127	9.77626	9.99328	noncoding	BX096431	lincRNA-BBOX1-2	lincRNA	738	chr11	-	27238707	27241649	AATCCGGGCTGCCAGTTTCATTTGGTTTGGGTGTCAGTAGCATGATGGAAAGACAAAAAA	intergenic							899.919	6.75871	9.87787
ASHG19A3A054863	6.26334e-05	2.43173	down	158.479	160.788	151.666	415.347	370.05	391.408	447.991	7.3782	7.39599	7.35708	8.74991	8.6243	8.69261	8.56947	noncoding	AF052103		NRED	1329	chr16	+	85399033	85400344	TCCCTTGCTAGCGTGTGACTCTGTGTGTCTGTCTGTGACTGGTTTAGATTTGTATGAAAT	intergenic							406.199	7.37709	8.65907
ASHG19A3L0002824	6.72873e-05	3.8508	down	998.832	1266.38	1063.08	3748.66	3694.19	3675.1	3685.3	9.86196	10.1837	9.99354	11.9006	11.9535	11.9816	11.9972	noncoding	chrX:40874482-40878593+	lincRNA-USP9X-7	lincRNA	4112	chrX	+	40874482	40878593	CAGGGGTCCCTTCTCCCCTTATGCTCACATTAGAATTTTCCCTTGACCTATTGAATGATG	intergenic							3700.81	10.0131	11.9582
ASHG19A3L0002403	0.00130711	6.53316	down	12.8676	28.5285	17.4989	137.912	149.731	153.843	154.437	3.86755	5.06245	4.37791	7.13689	7.22039	7.00791	7.20981	noncoding	chr1:181081092-181121244+	lincRNA-CACNA1E-3	lincRNA	40153	chr1	+	181081092	181121244	TGTTTATGTGGTAGCCCTACCATGACTCACACATCCAAATGAGGATTGCAGCCGTATAAG	intergenic							148.981	4.43597	7.14375
ASHG19A3A027118	0.00189603	3.27681	down	15.3848	14.0897	7.9092	48.2133	47.6271	56.1562	57.8938	4.11184	4.17331	3.30375	5.65697	5.71697	5.4344	5.4927	noncoding	uc003kkf.2	FLJ42709	UCSC_knowngene	2792	chr5	-	92745064	92917003	TTAGGGGTTGGTAGCTTACAATCAATCTACTTGGAACGTATCCAAATAAACTGGATATTT	intergenic							52.4726	3.86297	5.57526
ASHG19A3A012478	2.88192e-05	4.00422	down	222.818	210.224	227.716	883.792	844.878	786.757	990.733	7.84395	7.76062	7.89674	9.96858	9.69056	9.85593	9.8261	noncoding	ENST00000444167	AC006504.1	Ensembl	1329	chr19	+	28284401	28297684	CCTGAATTCCACGCTGGGACCTTAATTTGGTTTTAACACAAATAAAGATCTCACATAAAG	intergenic							876.54	7.83377	9.83529
ASHG19A3A049699	0.00984305	3.17584	down	22.6683	33.1173	12.2857	84.854	77.7121	87.4253	83.8975	4.67019	5.26139	3.89339	6.21269	6.36771	6.29384	6.22761	noncoding	BC016673		misc_RNA	1443	chr13	-	83493028	83494456	GACCTGTTGCACCCCAAATTTAATTATGATCACTGTAGAAGTATGACTATCATGAGAACA	intergenic							83.4722	4.60832	6.27546
ASHG19A3L0000488	0.00800727	5.668	down	7.77441	17.6158	16.5117	104.449	80.8967	84.5914	116.885	3.17312	4.44852	4.30443	6.71106	6.31854	6.59648	6.2867	noncoding	AW974611	lincRNA-PARP11-4	lincRNA	620	chr12	+	3900214	3900821	TTTGTGGGATGATGTTTGGGGCTTCTTTCTATCCTTGGGTTGAAAAATGTACTTTCCATC	intergenic							96.7057	3.97536	6.47819
ASHG19A3L0000893	0.0081321	2.80646	down	9.27186	21.8815	14.5792	54.7834	57.2537	49.9988	47.295	3.41586	4.71577	4.12596	5.35224	5.54237	5.62939	5.77444	noncoding	chr16:86616024-86626124-	lincRNA-FOXL1-2	lincRNA	10101	chr16	-	86616024	86626124	AGATCTGTTCCCTTTGTTTAGATGAGAGCAGAGAGGTATTCCTTCAGATTGCCTAAGAGT	intergenic							52.3327	4.08586	5.57461
ASHG19A3A019575	0.000257491	2.41018	down	136.779	140.887	127.849	386.389	331.867	335.56	354.517	7.18286	7.21974	7.12353	8.39114	8.39341	8.57915	8.41437	noncoding	AK126983		misc_RNA	5637	chr22	-	24243618	24249255	GCTCTATGAAACCCACTTTTCTGTACTCTGTTGCTCTAATAAACTTGCTTTGCTTTCACT	intergenic							352.083	7.17538	8.44452
ASHG19A3A035424	0.00176466	2.33242	down	17.3002	25.6999	17.6049	60.1144	57.2514	60.4178	56.7881	4.27277	4.92023	4.38857	5.62841	5.82365	5.76966	5.77433	noncoding	ENST00000457217	RP11-222A5.1	Ensembl	1809	chr1	+	175846478	175849604	TATTCAGGTAGCTCAATGAGCCATTTTCTTCCCAGGTGGCTCATTCCTTAGGGCATAATC	intergenic							58.6429	4.52719	5.74902
ASHG19A3L0001859	0.00309826	2.17568	down	6.97286	7.70515	7.74601	27.3514	27.1632	23.8041	18.7764	3.05641	3.49653	3.27832	3.92572	4.43255	4.58732	4.64863	noncoding	BF969023	lincRNA-ZNF800	lincRNA	778	chr7	-	127188015	127188758	AACTTGTACACTGCTGTGTTCACTGCTGGAATGATTCAAACTTGGTGGACTGTGACAACG	intergenic							24.2738	3.27709	4.39855
ASHG19A3L0000041	0.0141026	2.37824	down	12.0945	16.0512	15.0206	50.7237	36.7757	37.7419	56.6769	3.77434	4.33061	4.17456	5.62571	5.12302	5.51923	5.1043	noncoding	chr1:186710802-186723077+	lincRNA-PLA2G4A-2	lincRNA	12276	chr1	+	186710802	186723077	CTTGGCGATCCTTATACCAACTTTCTCAGTGTTCAGGTGACAAAGGCTAAGTTGCTCCAA	intergenic							45.4796	4.09317	5.34306
ASHG19A3L0002076	0.00304229	2.11408	down	399.935	499.998	339.574	839.654	750.103	783.126	945.741	8.63535	8.92545	8.45359	9.89511	9.68346	9.77796	9.64943	noncoding	DW444236	lincRNA-ZNF703-2	lincRNA	227	chr8	+	37001355	37001513	TCTGTCTCATTCCCCATCTCTCTATTCCAATCCCGCTCTTACTATGTGAATAAAAGATGG	intergenic							829.656	8.67146	9.75149
ASHG19A3A048169	5.16188e-05	2.69973	down	34.6988	33.6772	31.2828	108.66	109.471	106.618	112.848	5.27376	5.28242	5.18247	6.65455	6.66771	6.65587	6.73798	noncoding	uc001uih.1	AK056047	UCSC_knowngene	2922	chr12	-	130636130	130646768	TGTGTTTCTTCAATAATTCAGTGGATGACTTATTCTGCACGGACACTGCACACACTCGGC	bidirectional	NM_007197	FZD10	frizzled-10 precursor	+	130647003	130650285	109.399	5.24622	6.67903
ASHG19A3L0002816	0.000357479	2.14685	down	202.886	215.816	190.945	469.308	438.665	420.338	482.529	7.72134	7.79472	7.66954	8.86426	8.73472	8.8888	8.83525	noncoding	BM923628	lincRNA-BCOR-5	lincRNA	1670	chrX	+	39633448	39667369	TTATTTTTCCTGGTAATAAATGAACCAACTTTTCCCTGCCTTATTCCGTAAGCCCCCAAC	intergenic							452.71	7.72853	8.83076
ASHG19A3A040075	6.10854e-05	12.8296	down	5	5.39548	5	72.5625	75.2408	56.7217	87.3095	2.37766	2.35783	2.39437	6.26854	5.73318	6.05085	6.1795	noncoding	AK054860		NRED	2659	chrX	-	73040494	73043154	GGGATGGGGAATGGATTATTGGAAAATGGAAAGAAGAAAGTAACTAAAAGCCTTCCTTTC	intergenic							72.9586	2.37662	6.05802
ASHG19A3A021367	0.00220197	2.09678	down	380.167	427.992	434.904	921.854	759.699	729.089	931.45	8.57265	8.72082	8.78482	9.87336	9.58306	9.92164	9.6657	noncoding	ENST00000485582	MT-CO3	Ensembl	781	chr3	-	106615737	106616518	TCTGCCTACTCCGCCAACTAAAATTTCAGTATACATCTAACTGCCATTGTGGATTTGAAG	intergenic							835.523	8.69277	9.76094
ASHG19A3A030531	5.28532e-05	8.81593	down	23.7374	18.3751	17.3251	221.155	203.101	198.773	225.28	4.73793	4.50163	4.36487	7.70221	7.60186	7.72591	7.66971	noncoding	AK098583		misc_RNA	1544	chr6	-	132451391	132452935	GGTCTCCAAGCTTCTTCAATCGTGTGTTTCAACCACTAAAATAAATCCAAATATTTGTCC	intergenic							212.077	4.53481	7.67492
ASHG19A3A039798	0.00401787	6.64785	down	16.8634	5.57461	11.2582	81.016	79.4467	85.0453	94.2809	4.23891	2.67414	3.78122	6.38003	6.3263	6.22559	6.25866	noncoding	uc004dgl.1	BC015977	UCSC_knowngene	271	chrX	-	46185713	46187080	AAACCAGCAAGTTGAGAGAGGATCCAGAAGTAACCCCTTCTAAAACGGGAAAGATGCCTT	intergenic							84.9472	3.56476	6.29765
ASHG19A3L0000478	0.0351746	2.6389	down	5	5.23114	11.5739	23.3476	26.5436	21.5459	16.6579	2.37766	2.33124	3.81771	3.73802	4.27664	4.34113	4.61275	noncoding	chr12:32192533-32208358-	lincRNA-C12orf35-1	lincRNA	15826	chr12	-	32192533	32208358	AAACTTCTTTTCAAAGAACAGCCTCTCTGACAGGTTGATTCAGTGCAGGCGCACTGCATT	intergenic							22.0237	2.8422	4.24214
ASHG19A3L0000042	0.0338964	2.02686	down	16.3937	14.6376	17.3157	44.597	27.2006	44.7964	62.2868	4.19664	4.22153	4.36406	5.76444	5.38154	5.32267	4.65132	noncoding	chr1:188356202-188401002-	lincRNA-PLA2G4A-3	lincRNA	44801	chr1	-	188356202	188401002	CAGGAGTATCCCTTTTTATATGCAAATGATAATATGCCCTCGTCAAATTTTAATGGTTGC	intergenic							44.7202	4.26074	5.27999
ASHG19A3A043864	0.00362182	4.84511	down	11.8398	5.61419	11.7967	62.0399	54.4079	55.1122	58.4921	3.74752	2.73349	3.84291	5.67034	5.68933	5.81755	5.69413	noncoding	ENST00000446107	RP11-168P8.3	Ensembl	513	chr10	+	44407891	44409684	TGATTTATGGCACACAGCAGGGAAGGGCCTGAGCTTGAGCCCTGACCATCGTTATCATCA	intergenic							57.513	3.4413	5.71783
ASHG19A3L0002080	0.00485289	3.50012	down	124.974	91.0474	62.8612	372.17	351.623	283.253	380.849	7.05947	6.6245	6.14496	8.50195	8.14646	8.5263	8.49348	noncoding	chr8:37531517-37542367+	lincRNA-ZNF703-1	lincRNA	10851	chr8	+	37531517	37542367	AAGATACTGACCAGTCCTGATCCTTCTTCCCAGTGTCACAGAGTCAAAGTCACTCACAAA	intergenic							346.974	6.60965	8.41705
ASHG19A3A043394	0.0282146	2.73801	down	7.849	5.41326	9.66534	28.5983	25.812	28.3612	20.8464	3.18365	2.38408	3.57688	4.08952	4.69299	4.65397	4.56884	noncoding	ENST00000415509	RP11-338O1.2	Ensembl	416	chr10	-	125185228	125187156	GGGCCAGTGGTGCTGGATTTTATTTGCACTTTTCTGGGTTTAAATATTTTGAGAATTTTT	intergenic							25.9045	3.0482	4.50133
ASHG19A3A047039	9.2571e-05	5.53337	down	13.1939	7.19128	9.88136	73.1374	71.0489	73.158	81.3776	3.89971	3.42346	3.60267	6.16906	6.11432	6.06435	6.09269	noncoding	uc001pwp.1	AK097820	UCSC_knowngene	1784	chr11	+	119252519	119397374	AAACTCCTGAACGTAGCAAGGATGCTGGCAGCCAAGCCAATGACTACAAACATGATAAAG	intronic antisense	NM_006288	THY1	thy-1 membrane glycoprotein preproprotein	-	119288654	119294246	74.6805	3.64195	6.1101
ASHG19A3A047039	9.2571e-05	5.53337	down	13.1939	7.19128	9.88136	73.1374	71.0489	73.158	81.3776	3.89971	3.42346	3.60267	6.16906	6.11432	6.06435	6.09269	noncoding	uc001pwp.1	AK097820	UCSC_knowngene	1784	chr11	+	119252519	119397374	AAACTCCTGAACGTAGCAAGGATGCTGGCAGCCAAGCCAATGACTACAAACATGATAAAG	bidirectional	NM_004205	USP2	ubiquitin carboxyl-terminal hydrolase 2 isoform	-	119225924	119252436	74.6805	3.64195	6.1101
ASHG19A3L0002270	0.0115429	3.33051	down	7.85789	19.8063	11.1387	56.2142	47.1362	49.8128	58.0839	3.1852	4.59382	3.76738	5.66042	5.53567	5.66414	5.47794	noncoding	chrX:137339159-137368434-	lincRNA-ZIC3-3	lincRNA	29276	chrX	-	137339159	137368434	AATGCATTTGAAGAGGGAGCTCCTTACTGTCCTCCAAGTGCCTAGGATTGAAAAATAATC	intergenic							52.8118	3.8488	5.58454
ASHG19A3L0001226	0.00391295	3.61406	down	326.28	481.061	253.061	1214	1166.44	1052.35	1270.17	8.36033	8.87546	8.04134	10.3469	10.1342	10.3275	10.3087	noncoding	DA330754	lincRNA-TMSB10	lincRNA	558	chr2	-	85191205	85192095	TTGTGTTTCCCTTTTTAACCCCATTCTCTACCTTATGCAACTGGTGCCCTGTGGTCAACT	intergenic							1175.74	8.42571	10.2793
ASHG19A3L0003410	0.00687589	3.82454	down	21.8397	31.2209	30.8992	241.886	105.6	106.579	100.145	4.61111	5.18114	5.16759	6.46908	6.66752	7.86927	6.68174	noncoding	chr18:46516702-46521932-	lincRNA-SMAD7-2	lincRNA	5231	chr18	-	46516702	46521932	AGAGGGCACCCAGGCATTCGCTTTTAGAGTTGTCTTTAGGGTTGTGGAAATGGAGAGAAA	intergenic							138.552	4.98662	6.9219
ASHG19A3A050298	4.85651e-06	7.09373	down	240.849	246.459	254.29	1714.32	1597.74	1673.74	1789.17	7.94651	7.97304	8.04938	10.8405	10.811	10.8431	10.7701	noncoding	AK095282		misc_RNA	2401	chr13	+	74862163	74982939	AAGCGTTCATTTTCAAAGCAGCTAATGTAAACCATGATAATCACTAGTAGCACTATGCCA	intergenic							1693.74	7.98965	10.8162
ASHG19A3A052629	0.041989	2.93246	down	11.7055	5.60784	14.8694	87.8831	24.6683	26.6041	35.4495	3.73194	2.72396	4.15875	4.9153	4.59736	6.34646	4.5022	noncoding	uc001ytw.1	BC047459	UCSC_knowngene	3399	chr15	+	21145766	21198630	TACAGTGCTACCCTGAAAGCAGATCCAGAGACTAAGATTCACCTGCAGGTGATTCATTTG	intergenic							43.6512	3.53822	5.09033
ASHG19A3L0003225	0.00730677	2.92859	down	5	5.82995	5	21.9758	18.1199	17.4048	25.1455	2.37766	3.03973	2.39437	4.38996	3.94103	4.24562	4.0399	noncoding	BG221985	lincRNA-APOL3	lincRNA	776	chr22	+	36521981	36524915	ATCAGTATCCATCCTGACTGGACCCAAGTGGACAGTTTGAGTTTCCAGTTCAATCCAGTT	intergenic							20.6615	2.60392	4.15413
ASHG19A3L0000258	0.0149856	2.74934	down	36.9053	44.081	18.5007	121.394	90.0138	105.794	103.58	5.35784	5.63814	4.45898	6.52385	6.65481	6.8227	6.4416	noncoding	chr10:55003944-55021494+	lincRNA-PCDH15-1	lincRNA	17551	chr10	+	55003944	55021494	CAGTCCTGTCTTTCAAATTAGGTCTGTTTTTCTCTATTCCTTCTGTACTGAAACATACAC	intergenic							105.195	5.15165	6.61074
ASHG19A3L0002086	0.00339103	2.06084	down	108.234	136.39	126.299	283.117	274.995	244.034	311.118	6.86378	7.17464	7.1075	8.19885	7.92056	8.10731	8.14076	noncoding	DA942624	lincRNA-KIAA0146-1	lincRNA	581	chr8	+	47834211	47840458	AACTTTTGTCAAAAATCAGAATGCACCAGCCTTGCCTTTGGAGCCACCTACATCGACTTC	intergenic							278.316	7.04864	8.09187
ASHG19A3L0000140	0.00173903	2.53978	down	806.527	933.938	686.619	1931.46	1781.5	1641.52	1942.77	9.56153	9.76559	9.40057	10.961	10.7869	11.0069	10.9277	noncoding	exon90+	lincRNA-KNCN	lincRNA	643	chr1	+	46985867	46986509	TGCACTGGACCACACAATCCCAGGGTGTCTGTCTCCCTGTCTCTCATGCCTGTGTACACA								1824.31	9.5759	10.9206
ASHG19A3A031484	0.00389964	2.30204	down	24.8332	26.5285	19.3931	68.9637	62.5831	58.1399	84.582	4.80317	4.96732	4.52737	6.22353	5.76545	5.9768	5.90968	noncoding	ENST00000405234	RP1-278E11.5	Ensembl	1099	chr6	+	39960553	39967972	CAAGAACAGTCTGACATCCCATCTCATGGCCTGAAAATGTCATTCACTGGTATTGTCAAC	intergenic							68.5672	4.76595	5.96886
ASHG19A3L0001280	0.0463654	2.63985	down	11.393	5.64922	12.8113	22.8524	35.1474	35.3399	41.3812	3.69478	2.79052	3.95252	5.15255	5.022	4.30692	5.03745	noncoding	chr21:24098079-24121804-	lincRNA-NCAM2-3	lincRNA	23726	chr21	-	24098079	24121804	GCTCTACCTGGGTGAACATCATCAGACACTATTTTATATATGGCTTTTATTTGGGAGGAA	intergenic							33.6802	3.47927	4.87973
ASHG19A3A020672	0.00285076	2.5712	down	309.24	354.019	415.146	924.488	789.542	846.014	990.831	8.28517	8.46281	8.72743	9.96939	9.79452	9.92591	9.72718	noncoding	NR_033378	LOC100288428	RefSeq_NR	2147	chr3	-	8262834	8543344	AGAATCATCCAGCTCTTTTCTCCTCTTCAAAGTTGCCCTTCTTTTCTCTGAACATTAATG	bidirectional	NM_014583	LMCD1	LIM and cysteine-rich domains protein 1	+	8543510	8609806	887.718	8.49181	9.85425
ASHG19A3L0001346	0.0086244	2.18591	down	25.2835	31.5568	28.8633	79.8621	62.4326	71.2375	99.2948	4.83069	5.19477	5.07355	6.45755	6.0778	6.20358	5.90601	noncoding	chr3:16757321-16768646+	lincRNA-PLCL2	lincRNA	11326	chr3	+	16757321	16768646	GAGGGCCATTTTGTGGATATTGTGCTCTCTAAACTTGTAGTTGGCTCCAAATTATCACAG	intergenic							78.2067	5.033	6.16124
ASHG19A3A035810	6.33328e-05	9.14738	down	87.4252	73.1246	63.385	690.18	740.996	621.721	847.782	6.57046	6.3209	6.1549	9.72781	9.33685	9.47371	9.63008	noncoding	AK097857		misc_RNA	1950	chr8	-	61878391	61880338	TTCACATCTCCAAAGGTCCTCTACCTTAGAAGAAGAAAGAAAGAGGGAAAGAGAAATAAA	intergenic							725.17	6.34875	9.54211
ASHG19A3L0000183	8.16595e-06	2.46645	down	119.685	125.957	122.205	329.42	311.387	332.983	344.372	7.00225	7.06624	7.06012	8.34584	8.38317	8.33946	8.31275	noncoding	BC036122	lincRNA-LRRC8D-2	lincRNA	3001	chr1	+	90098630	90230061	AAAGACAACTGGTTTGCTCACAGTTCTGATACCGGCCTTGAACTGAACTTTCCATCTCTG	exon sense-overlapping	NM_032270	LRRC8C	leucine-rich repeat-containing protein 8C	+	90098643	90185094	329.541	7.04287	8.3453
ASHG19A3L0002172	0.00119601	2.18156	down	42.8376	53.5009	41.2624	107.352	122.673	118.105	127.101	5.56521	5.89599	5.56508	6.83315	6.82263	6.63738	6.91001	noncoding	BE617381	lincRNA-GDF6-1	lincRNA	1097	chr8	+	96387622	96388412	ACATACAACACGAAGAACACAAGCGGAGGGGGCATCAGTACACCACCACCACGACGCGAA	intergenic							118.808	5.67543	6.80079
ASHG19A3L0002117	0.00322675	4.41801	down	12.6332	28.1003	16.5216	105.716	94.6034	96.4128	102.279	3.8399	5.04179	4.30558	6.50263	6.51597	6.61542	6.52259	noncoding	AV731505	lincRNA-PDE7A	lincRNA	403	chr8	-	66865963	66866366	ATAAATGCAGCCAATGGCAACTAACACATGCTTCTTGTTGTCATCCAACCTCTTTCCCTG	intergenic							99.7528	4.39576	6.53915
ASHG19A3A026541	0.0128773	3.00827	down	18.9308	22.6347	16.1803	55.1092	116.272	66.6095	65.4688	4.40951	4.75817	4.27761	5.83856	5.9764	5.6374	6.83045	noncoding	ENST00000503953	CTD-2154B17.1	Ensembl	342	chr5	-	10775169	10777174	CTGGTGTTAGATCAAGTCTGGCCTTTACTATTCCATTAAAAAATGACCATTTGTGATTAG	intergenic							75.8649	4.48177	6.0707
ASHG19A3L0000129	0.000780214	4.14332	down	37.2069	39.3691	44.2011	204.921	181.446	164.42	239.308	5.36782	5.48979	5.66242	7.80158	7.32049	7.60912	7.49868	noncoding	BU663229	lincRNA-POU3F1-1	lincRNA	555	chr1	-	39183439	39183984	AAGGTGAAGGAAATGGGTTTATGAAAACTGCCTCTGATTGCCATCGGGTGTGAGGTTGTT	intergenic							197.524	5.50668	7.55747
ASHG19A3A042513	7.04902e-05	24.2387	down	7.29967	8.71489	7.88449	257.877	257.932	227.047	263.527	3.10489	3.62216	3.30119	7.94857	7.80599	7.96816	8.04522	noncoding	ENST00000431157	RP11-354E11.2	Ensembl	823	chr10	-	20010625	20017479	ATGGCCTTTCTATCTATTTCTACTATGGAGAAGCTGAAAAAGCTATATGGCTGGAAAAAA	intergenic							251.596	3.34275	7.94199
ASHG19A3L0000876	0.00798124	2.00774	down	22.561	23.0719	18.8069	50.395	65.8849	56.36	48.1784	4.66204	4.78424	4.48246	5.37794	5.72345	5.50912	5.98344	noncoding	CN315150	lincRNA-FAM65A-3	lincRNA	705	chr16	+	67536554	67537247	GAGGGAGAAGGAGAGAAATGTAAAAACTTTAGAAAAACTTCAGTGCTTCTTAGTTGGTTT	intergenic							55.2046	4.64291	5.64849
ASHG19A3L0002903	0.0038997	2.12501	down	10.2713	5.7328	5.20746	18.5635	18.0612	23.37	24.467	3.561	2.91966	2.83434	4.34834	4.39941	3.98814	4.03399	noncoding	AV718641	lincRNA-PMCH	lincRNA	636	chr12	-	102604245	102604880	ACTGGTTTGCCTTCTATATACTAGAGTTGATAGTGGTTATACTTCTGGCAGGCCAAAAAA	intergenic							21.1154	3.105	4.19247
ASHG19A3L0002188	0.00023217	4.49508	down	28.3731	31.9399	24.3027	121.189	161.299	171.264	160.649	4.98956	5.21213	4.83016	7.19024	7.38051	6.81965	7.32545	noncoding	chr9:111547504-111559779-	lincRNA-KLF4-4	lincRNA	12276	chr9	-	111547504	111559779	GGCTTGGCTGACTTATTTGTTTCTCATCGTACTATGCACTTCTCTTTAAAGTAACCTGTT	intergenic							153.6	5.01062	7.17896
ASHG19A3L0000057	0.0182538	2.1637	down	95.0114	100.841	55.6855	222.21	194.245	184.325	200.761	6.68735	6.76509	5.97661	7.53303	7.49163	7.73368	7.60106	noncoding	chr1:198335952-198347302-	lincRNA-NEK7	lincRNA	11351	chr1	-	198335952	198347302	AATGCCTCCTTCTTAAGCAAATAGCTATGCACTCTTCAGGATGTCAGTCCCTTCTTCAAA	intergenic							200.385	6.47635	7.58985
ASHG19A3A048534	7.8351e-05	7.66527	down	31.1054	32.5801	36.8612	279.717	298.398	289.482	322.819	5.11557	5.24073	5.41096	8.25068	8.18242	8.08955	8.25371	noncoding	BC014370		NRED	1587	chr12	+	46781527	47269938	GCAGCCCTGGTTAAGCATTGAAAAGATGATATTACCAATAAGTTGACTCTAATTGTAAAC	intronic antisense	NM_018018	SLC38A4	sodium-coupled neutral amino acid transporter 4	-	47158543	47219780	297.604	5.25575	8.19409
ASHG19A3A048534	7.8351e-05	7.66527	down	31.1054	32.5801	36.8612	279.717	298.398	289.482	322.819	5.11557	5.24073	5.41096	8.25068	8.18242	8.08955	8.25371	noncoding	BC014370		NRED	1587	chr12	+	46781527	47269938	GCAGCCCTGGTTAAGCATTGAAAAGATGATATTACCAATAAGTTGACTCTAATTGTAAAC	intronic antisense	NM_001143824	SLC38A4	sodium-coupled neutral amino acid transporter 4	-	47158543	47219780	297.604	5.25575	8.19409
ASHG19A3A034020	8.34243e-06	2.07866	down	38293	38674.4	36838.4	58889.9	60371	63319.2	60052.5	14.9786	15.0232	14.9929	15.9912	16.1149	16.0586	16.0508	noncoding	ENST00000396599	AC005062.3	Ensembl	483	chr7	+	20042387	20042870	AGTTAAGGGCAAGATTCTTGCCAAGAGAATTAATGTGCGTATTGAGCACATTAAGCACTC	intergenic							60658.2	14.9982	16.0539
ASHG19A3L0003388	0.00410773	2.11799	down	27.9768	31.7955	22.9523	74.1292	74.2767	68.0526	71.9787	4.96884	5.20549	4.7506	5.97878	6.00448	6.08787	6.15955	noncoding	chr5:116378824-116397091-	lincRNA-SEMA6A-6	lincRNA	18268	chr5	-	116378824	116397091	CTCATACCCTAGAGGGAAACCTCATCTCTCTTTTGAGAAGAGGAAATTAATATATGTTTA	intergenic							72.1093	4.97497	6.05767
ASHG19A3A041075	9.80069e-05	3.0407	down	812.126	796.647	669.865	2041.94	2024.9	2070.96	2098.05	9.57105	9.55154	9.36989	11.0784	11.1212	11.0938	11.1142	noncoding	ENST00000374922	RP11-622K12.1	Ensembl	1529	chrX	+	56755691	56844813	CTGAGTATTTTACCCAATCCTCTGAAATTAGTCCCTAGCATCAGAATTAAAGAATCTGAA	intergenic							2058.96	9.49749	11.1019
ASHG19A3L0000347	2.66049e-05	2.3593	down	32.7565	32.8274	36.8041	101.718	99.5639	92.9316	100.257	5.18965	5.24965	5.40865	6.4706	6.46116	6.55892	6.59334	noncoding	AK054728	lincRNA-CALCA	lincRNA	2258	chr11	+	14926542	15100182	GAGGACACATGGTAATGGTGATGCTGTGCCTTGTTATCTAAGAACATGATTGTATAATTT	intronic antisense	NM_001033952	CALCA	calcitonin CT preproprotein	-	14990047	14993832	98.6176	5.28265	6.521
ASHG19A3L0000347	2.66049e-05	2.3593	down	32.7565	32.8274	36.8041	101.718	99.5639	92.9316	100.257	5.18965	5.24965	5.40865	6.4706	6.46116	6.55892	6.59334	noncoding	AK054728	lincRNA-CALCA	lincRNA	2258	chr11	+	14926542	15100182	GAGGACACATGGTAATGGTGATGCTGTGCCTTGTTATCTAAGAACATGATTGTATAATTT	intronic antisense	NM_001033953	CALCA	calcitonin gene-related peptide 1 alpha-CGRP	-	14988214	14993832	98.6176	5.28265	6.521
ASHG19A3L0000347	2.66049e-05	2.3593	down	32.7565	32.8274	36.8041	101.718	99.5639	92.9316	100.257	5.18965	5.24965	5.40865	6.4706	6.46116	6.55892	6.59334	noncoding	AK054728	lincRNA-CALCA	lincRNA	2258	chr11	+	14926542	15100182	GAGGACACATGGTAATGGTGATGCTGTGCCTTGTTATCTAAGAACATGATTGTATAATTT	intronic antisense	NM_001741	CALCA	calcitonin CT preproprotein	-	14990047	14993832	98.6176	5.28265	6.521
ASHG19A3L0000347	2.66049e-05	2.3593	down	32.7565	32.8274	36.8041	101.718	99.5639	92.9316	100.257	5.18965	5.24965	5.40865	6.4706	6.46116	6.55892	6.59334	noncoding	AK054728	lincRNA-CALCA	lincRNA	2258	chr11	+	14926542	15100182	GAGGACACATGGTAATGGTGATGCTGTGCCTTGTTATCTAAGAACATGATTGTATAATTT	exon sense-overlapping	NM_000728	CALCB	calcitonin gene-related peptide 2 precursor	+	15095145	15100177	98.6176	5.28265	6.521
ASHG19A3L0001395	6.03791e-05	5.75385	down	41.9065	34.287	41.3131	252.126	258.773	260.782	268.177	5.53254	5.3056	5.56722	7.97273	8.01898	7.92983	8.05039	noncoding	EU831898	lincRNA-RPL29	lincRNA	3142	chr3	-	51965892	52258329	CAAAACCCTCTTTGAGAACCTGTGGGCCTCGGTCTATGGCAGCCGCAAGACGCTGTTTGT	exon sense-overlapping	NM_017442	TLR9	toll-like receptor 9 precursor	-	52255095	52260179	259.964	5.46845	7.99298
ASHG19A3L0001395	6.03791e-05	5.75385	down	41.9065	34.287	41.3131	252.126	258.773	260.782	268.177	5.53254	5.3056	5.56722	7.97273	8.01898	7.92983	8.05039	noncoding	EU831898	lincRNA-RPL29	lincRNA	3142	chr3	-	51965892	52258329	CAAAACCCTCTTTGAGAACCTGTGGGCCTCGGTCTATGGCAGCCGCAAGACGCTGTTTGT	intronic antisense	NM_001198898	ACY1	aminoacylase-1 isoform d	+	52017299	52023218	259.964	5.46845	7.99298
ASHG19A3L0001395	6.03791e-05	5.75385	down	41.9065	34.287	41.3131	252.126	258.773	260.782	268.177	5.53254	5.3056	5.56722	7.97273	8.01898	7.92983	8.05039	noncoding	EU831898	lincRNA-RPL29	lincRNA	3142	chr3	-	51965892	52258329	CAAAACCCTCTTTGAGAACCTGTGGGCCTCGGTCTATGGCAGCCGCAAGACGCTGTTTGT	intron sense-overlapping	NM_000992	RPL29	60S ribosomal protein L29	-	52027643	52029958	259.964	5.46845	7.99298
ASHG19A3L0001395	6.03791e-05	5.75385	down	41.9065	34.287	41.3131	252.126	258.773	260.782	268.177	5.53254	5.3056	5.56722	7.97273	8.01898	7.92983	8.05039	noncoding	EU831898	lincRNA-RPL29	lincRNA	3142	chr3	-	51965892	52258329	CAAAACCCTCTTTGAGAACCTGTGGGCCTCGGTCTATGGCAGCCGCAAGACGCTGTTTGT	intronic antisense	NM_000688	ALAS1	5-aminolevulinate synthase, nonspecific,	+	52232143	52248343	259.964	5.46845	7.99298
ASHG19A3L0001395	6.03791e-05	5.75385	down	41.9065	34.287	41.3131	252.126	258.773	260.782	268.177	5.53254	5.3056	5.56722	7.97273	8.01898	7.92983	8.05039	noncoding	EU831898	lincRNA-RPL29	lincRNA	3142	chr3	-	51965892	52258329	CAAAACCCTCTTTGAGAACCTGTGGGCCTCGGTCTATGGCAGCCGCAAGACGCTGTTTGT	intronic antisense	NM_000666	ACY1	aminoacylase-1 isoform a	+	52017299	52023218	259.964	5.46845	7.99298
ASHG19A3L0001395	6.03791e-05	5.75385	down	41.9065	34.287	41.3131	252.126	258.773	260.782	268.177	5.53254	5.3056	5.56722	7.97273	8.01898	7.92983	8.05039	noncoding	EU831898	lincRNA-RPL29	lincRNA	3142	chr3	-	51965892	52258329	CAAAACCCTCTTTGAGAACCTGTGGGCCTCGGTCTATGGCAGCCGCAAGACGCTGTTTGT	intronic antisense	NM_001198897	ACY1	aminoacylase-1 isoform c	+	52017299	52023218	259.964	5.46845	7.99298
ASHG19A3L0001395	6.03791e-05	5.75385	down	41.9065	34.287	41.3131	252.126	258.773	260.782	268.177	5.53254	5.3056	5.56722	7.97273	8.01898	7.92983	8.05039	noncoding	EU831898	lincRNA-RPL29	lincRNA	3142	chr3	-	51965892	52258329	CAAAACCCTCTTTGAGAACCTGTGGGCCTCGGTCTATGGCAGCCGCAAGACGCTGTTTGT	intronic antisense	NM_199166	ALAS1	5-aminolevulinate synthase, nonspecific,	+	52232115	52248343	259.964	5.46845	7.99298
ASHG19A3L0001395	6.03791e-05	5.75385	down	41.9065	34.287	41.3131	252.126	258.773	260.782	268.177	5.53254	5.3056	5.56722	7.97273	8.01898	7.92983	8.05039	noncoding	EU831898	lincRNA-RPL29	lincRNA	3142	chr3	-	51965892	52258329	CAAAACCCTCTTTGAGAACCTGTGGGCCTCGGTCTATGGCAGCCGCAAGACGCTGTTTGT	intronic antisense	NM_001198895	ACY1	aminoacylase-1 isoform a	+	52017299	52023218	259.964	5.46845	7.99298
ASHG19A3L0001395	6.03791e-05	5.75385	down	41.9065	34.287	41.3131	252.126	258.773	260.782	268.177	5.53254	5.3056	5.56722	7.97273	8.01898	7.92983	8.05039	noncoding	EU831898	lincRNA-RPL29	lincRNA	3142	chr3	-	51965892	52258329	CAAAACCCTCTTTGAGAACCTGTGGGCCTCGGTCTATGGCAGCCGCAAGACGCTGTTTGT	intron sense-overlapping	NM_001947	DUSP7	dual specificity protein phosphatase 7	-	52082936	52090461	259.964	5.46845	7.99298
ASHG19A3L0001395	6.03791e-05	5.75385	down	41.9065	34.287	41.3131	252.126	258.773	260.782	268.177	5.53254	5.3056	5.56722	7.97273	8.01898	7.92983	8.05039	noncoding	EU831898	lincRNA-RPL29	lincRNA	3142	chr3	-	51965892	52258329	CAAAACCCTCTTTGAGAACCTGTGGGCCTCGGTCTATGGCAGCCGCAAGACGCTGTTTGT	intron sense-overlapping	NM_001161581	POC1A	POC1 centriolar protein homolog A isoform 3	-	52109248	52188706	259.964	5.46845	7.99298
ASHG19A3L0001395	6.03791e-05	5.75385	down	41.9065	34.287	41.3131	252.126	258.773	260.782	268.177	5.53254	5.3056	5.56722	7.97273	8.01898	7.92983	8.05039	noncoding	EU831898	lincRNA-RPL29	lincRNA	3142	chr3	-	51965892	52258329	CAAAACCCTCTTTGAGAACCTGTGGGCCTCGGTCTATGGCAGCCGCAAGACGCTGTTTGT	intron sense-overlapping	NM_001146314	ABHD14B	abhydrolase domain-containing protein 14B	-	52002525	52008646	259.964	5.46845	7.99298
ASHG19A3L0001395	6.03791e-05	5.75385	down	41.9065	34.287	41.3131	252.126	258.773	260.782	268.177	5.53254	5.3056	5.56722	7.97273	8.01898	7.92983	8.05039	noncoding	EU831898	lincRNA-RPL29	lincRNA	3142	chr3	-	51965892	52258329	CAAAACCCTCTTTGAGAACCTGTGGGCCTCGGTCTATGGCAGCCGCAAGACGCTGTTTGT	intron sense-overlapping	NM_004704	RRP9	U3 small nucleolar RNA-interacting protein 2	-	51967445	51975922	259.964	5.46845	7.99298
ASHG19A3L0001395	6.03791e-05	5.75385	down	41.9065	34.287	41.3131	252.126	258.773	260.782	268.177	5.53254	5.3056	5.56722	7.97273	8.01898	7.92983	8.05039	noncoding	EU831898	lincRNA-RPL29	lincRNA	3142	chr3	-	51965892	52258329	CAAAACCCTCTTTGAGAACCTGTGGGCCTCGGTCTATGGCAGCCGCAAGACGCTGTTTGT	intronic antisense	NM_001198896	ACY1	aminoacylase-1 isoform b	+	52017299	52023218	259.964	5.46845	7.99298
ASHG19A3L0001395	6.03791e-05	5.75385	down	41.9065	34.287	41.3131	252.126	258.773	260.782	268.177	5.53254	5.3056	5.56722	7.97273	8.01898	7.92983	8.05039	noncoding	EU831898	lincRNA-RPL29	lincRNA	3142	chr3	-	51965892	52258329	CAAAACCCTCTTTGAGAACCTGTGGGCCTCGGTCTATGGCAGCCGCAAGACGCTGTTTGT	intron sense-overlapping	NM_020418	PCBP4	poly(rC)-binding protein 4 isoform a	-	51991469	52001450	259.964	5.46845	7.99298
ASHG19A3L0001395	6.03791e-05	5.75385	down	41.9065	34.287	41.3131	252.126	258.773	260.782	268.177	5.53254	5.3056	5.56722	7.97273	8.01898	7.92983	8.05039	noncoding	EU831898	lincRNA-RPL29	lincRNA	3142	chr3	-	51965892	52258329	CAAAACCCTCTTTGAGAACCTGTGGGCCTCGGTCTATGGCAGCCGCAAGACGCTGTTTGT	intron sense-overlapping	NM_015426	POC1A	POC1 centriolar protein homolog A isoform 1	-	52109248	52188706	259.964	5.46845	7.99298
ASHG19A3L0001395	6.03791e-05	5.75385	down	41.9065	34.287	41.3131	252.126	258.773	260.782	268.177	5.53254	5.3056	5.56722	7.97273	8.01898	7.92983	8.05039	noncoding	EU831898	lincRNA-RPL29	lincRNA	3142	chr3	-	51965892	52258329	CAAAACCCTCTTTGAGAACCTGTGGGCCTCGGTCTATGGCAGCCGCAAGACGCTGTTTGT	intron sense-overlapping	NM_001161580	POC1A	POC1 centriolar protein homolog A isoform 2	-	52109248	52188706	259.964	5.46845	7.99298
ASHG19A3L0001395	6.03791e-05	5.75385	down	41.9065	34.287	41.3131	252.126	258.773	260.782	268.177	5.53254	5.3056	5.56722	7.97273	8.01898	7.92983	8.05039	noncoding	EU831898	lincRNA-RPL29	lincRNA	3142	chr3	-	51965892	52258329	CAAAACCCTCTTTGAGAACCTGTGGGCCTCGGTCTATGGCAGCCGCAAGACGCTGTTTGT	intron sense-overlapping	NM_033010	PCBP4	poly(rC)-binding protein 4 isoform c	-	51991469	51996908	259.964	5.46845	7.99298
ASHG19A3L0001395	6.03791e-05	5.75385	down	41.9065	34.287	41.3131	252.126	258.773	260.782	268.177	5.53254	5.3056	5.56722	7.97273	8.01898	7.92983	8.05039	noncoding	EU831898	lincRNA-RPL29	lincRNA	3142	chr3	-	51965892	52258329	CAAAACCCTCTTTGAGAACCTGTGGGCCTCGGTCTATGGCAGCCGCAAGACGCTGTTTGT	intron sense-overlapping	NM_032750	ABHD14B	abhydrolase domain-containing protein 14B	-	52002525	52008646	259.964	5.46845	7.99298
ASHG19A3L0001395	6.03791e-05	5.75385	down	41.9065	34.287	41.3131	252.126	258.773	260.782	268.177	5.53254	5.3056	5.56722	7.97273	8.01898	7.92983	8.05039	noncoding	EU831898	lincRNA-RPL29	lincRNA	3142	chr3	-	51965892	52258329	CAAAACCCTCTTTGAGAACCTGTGGGCCTCGGTCTATGGCAGCCGCAAGACGCTGTTTGT	intronic antisense	NM_015407	ABHD14A	abhydrolase domain-containing protein 14A	+	52009041	52015216	259.964	5.46845	7.99298
ASHG19A3L0001395	6.03791e-05	5.75385	down	41.9065	34.287	41.3131	252.126	258.773	260.782	268.177	5.53254	5.3056	5.56722	7.97273	8.01898	7.92983	8.05039	noncoding	EU831898	lincRNA-RPL29	lincRNA	3142	chr3	-	51965892	52258329	CAAAACCCTCTTTGAGAACCTGTGGGCCTCGGTCTATGGCAGCCGCAAGACGCTGTTTGT	intronic antisense	NM_005485	PARP3	poly [ADP-ribose] polymerase 3 isoform b	+	51976360	51982883	259.964	5.46845	7.99298
ASHG19A3L0001395	6.03791e-05	5.75385	down	41.9065	34.287	41.3131	252.126	258.773	260.782	268.177	5.53254	5.3056	5.56722	7.97273	8.01898	7.92983	8.05039	noncoding	EU831898	lincRNA-RPL29	lincRNA	3142	chr3	-	51965892	52258329	CAAAACCCTCTTTGAGAACCTGTGGGCCTCGGTCTATGGCAGCCGCAAGACGCTGTTTGT	intronic antisense	NM_001003931	PARP3	poly [ADP-ribose] polymerase 3 isoform a	+	51976360	51982883	259.964	5.46845	7.99298
ASHG19A3L0001395	6.03791e-05	5.75385	down	41.9065	34.287	41.3131	252.126	258.773	260.782	268.177	5.53254	5.3056	5.56722	7.97273	8.01898	7.92983	8.05039	noncoding	EU831898	lincRNA-RPL29	lincRNA	3142	chr3	-	51965892	52258329	CAAAACCCTCTTTGAGAACCTGTGGGCCTCGGTCTATGGCAGCCGCAAGACGCTGTTTGT	intron sense-overlapping	NM_033008	PCBP4	poly(rC)-binding protein 4 isoform c	-	51991469	52001482	259.964	5.46845	7.99298
ASHG19A3L0001395	6.03791e-05	5.75385	down	41.9065	34.287	41.3131	252.126	258.773	260.782	268.177	5.53254	5.3056	5.56722	7.97273	8.01898	7.92983	8.05039	noncoding	EU831898	lincRNA-RPL29	lincRNA	3142	chr3	-	51965892	52258329	CAAAACCCTCTTTGAGAACCTGTGGGCCTCGGTCTATGGCAGCCGCAAGACGCTGTTTGT	intronic antisense	NM_080865	GPR62	probable G-protein coupled receptor 62	+	51989329	51991520	259.964	5.46845	7.99298
ASHG19A3L0001395	6.03791e-05	5.75385	down	41.9065	34.287	41.3131	252.126	258.773	260.782	268.177	5.53254	5.3056	5.56722	7.97273	8.01898	7.92983	8.05039	noncoding	EU831898	lincRNA-RPL29	lincRNA	3142	chr3	-	51965892	52258329	CAAAACCCTCTTTGAGAACCTGTGGGCCTCGGTCTATGGCAGCCGCAAGACGCTGTTTGT	intron sense-overlapping	NM_001174100	PCBP4	poly(rC)-binding protein 4 isoform c	-	51991469	52001482	259.964	5.46845	7.99298
ASHG19A3A012477	0.00253009	3.02649	down	34.3873	16.7756	22.3604	93.6941	82.7639	87.3163	96.6394	5.26077	4.38913	4.71774	6.41803	6.36631	6.44076	6.32233	noncoding	uc002nry.1	BC024732	UCSC_knowngene	827	chr19	+	28284401	28297182	TATGAGAGCCTCTTGGCTTTTACCTGGTCTGCGAGAAATCAAACTTTGGGCACAAGTCAT	intergenic							90.1034	4.78921	6.38686
ASHG19A3L0002757	0.0158469	2.61328	down	14.7007	11.2167	7.42992	43.1926	39.4207	38.5904	33.4201	4.05192	3.90659	3.22611	4.82275	5.15687	5.26781	5.20885	noncoding	DA857280	lincRNA-SEMA7A	lincRNA	581	chr15	+	74683148	74683728	TTCTTAGGAAACCTTAGTTCCATCCCAGGCAAGTGGCTCTGATGATTCAGTAGGTGACTT	intergenic							38.6559	3.72821	5.11407
ASHG19A3A054827	6.57508e-05	2.6202	down	2283.67	2538.98	2179.74	5001.4	5090.47	5116.9	5491.74	11.0166	11.1638	11.0014	12.4838	12.4426	12.4138	12.4608	noncoding	AK095707		misc_RNA	2984	chr16	+	81421429	81424413	CCATCATGCTGTTCTCTTGTACCAAGGATCAGTGAAAGTGTTTTATCTTTTTTATGTAGT	intergenic							5175.13	11.0606	12.4503
ASHG19A3L0003181	0.000328258	7.30714	down	5	5.62596	5	47.8829	38.6576	42.0326	56.5257	2.37766	2.75428	2.39437	5.62122	5.28459	5.42595	5.18055	noncoding	AI359363	lincRNA-SOX21-3	lincRNA	412	chr13	-	95619577	95619989	CCCCAACAGGGGATTTCAATGTAACGCAATTCAAATAAGTAAAAACCACTTTATTGCTTT	intergenic							46.2747	2.50877	5.37808
ASHG19A3L0001935	0.000338373	3.04402	down	23.6945	15.6331	19.5969	80.5679	62.1407	70.069	92.5834	4.73425	4.29907	4.54153	6.35425	6.0533	6.21738	5.89878	noncoding	CK905565	lincRNA-HGF-2	lincRNA	575	chr7	-	81449297	81449864	CCTCCAGCCATTGCTGTTCACAATTAAGTACCACATGAACTAAAATGATATTTTGGCTTG	intergenic							76.3403	4.52495	6.13093
ASHG19A3L0002585	0.00825304	3.04803	down	17.5201	27.1017	17.9281	101.948	70.0104	63.8897	80.5036	4.29313	4.99446	4.41256	6.15325	5.91056	6.56171	6.07286	noncoding	chr3:13577339-13583378-	lincRNA-HDAC11-1	lincRNA	6040	chr3	-	13577339	13583378	ACAGATGAGAAATGCAGGATGCTTGGAGGTGGTGGTGTAAGCCCTTGGGCTCAGCCAGGA	intergenic							79.088	4.56672	6.17459
ASHG19A3A028300	0.00160491	4.06913	down	48.3563	88.5738	55.3015	336.263	249.246	280.547	270.296	5.73723	6.58373	5.96663	7.98652	8.1325	8.37365	7.98966	noncoding	ENST00000515077	CTD-2187J20.1	Ensembl	509	chr5	+	66563849	66566010	GTGTAAATAGATGCTTGACCTTCATCCTGCCATTCATCCATATGGACCCTAAACGCTCTC	intergenic							284.088	6.09586	8.12058
ASHG19A3L0001880	0.00241752	2.02583	down	8.68984	5.82712	6.72184	18.6969	16.7955	21.7814	27.007	3.32627	3.03574	3.1104	4.49269	4.29282	3.99873	3.9197	noncoding	chr7:149053542-149080742+	lincRNA-ZNF777	lincRNA	27201	chr7	+	149053542	149080742	GATATTCCCAAGTCTTGGCTTTCTCATCTGGAAAATGAGAGAAGGAAAGACCTTCTTATC	intergenic							21.0702	3.15747	4.17599
ASHG19A3L0000711	0.00837859	2.27514	down	110.201	140.163	107.871	281.591	303.554	239.543	373.379	6.88608	7.2139	6.89346	8.46928	7.88935	8.09786	8.27859	noncoding	chr14:25152560-25164885-	lincRNA-GZMB	lincRNA	12326	chr14	-	25152560	25164885	GTCTTCCCTCTTCGGAGAGACAATGTGTCTCCACTTCACATATTTGGATACATGAAATAA	intergenic							299.517	6.99782	8.18377
ASHG19A3A026890	0.000370543	2.96032	down	195.275	225.291	212.958	679.922	579.127	582.067	696.576	7.67088	7.85206	7.81449	9.43154	9.23896	9.45002	9.25906	noncoding	ENST00000503268	CTC-340D7.1	Ensembl	499	chr5	-	68128411	68257985	CTTCGACTTCTGACCTCTGGCCCTGTTTGAAAACCAACTCAAATCGTTTTTCTTTTTCAG	intergenic							634.423	7.77914	9.3449
ASHG19A3L0000696	0.000519181	2.57481	down	45.1957	53.6479	60.701	165.089	164.56	146.514	160.854	5.64295	5.89983	6.09748	7.19254	7.14574	7.28513	7.35479	noncoding	AI902205	lincRNA-OXGR1-2	lincRNA	448	chr13	-	97778688	97779138	ATTCTTACTGCCATGTAATAGAAATAGCAACCTCTCACTTGTAGGGCCCCTGTCTGCTTC	intergenic							159.254	5.88009	7.24455
ASHG19A3L0001818	0.00423246	3.0658	down	44.6228	98.4482	58.8709	241.13	212.796	222.497	214.283	5.62242	6.73249	6.05491	7.62805	7.77972	7.86343	7.74028	noncoding	chr6:63073666-63086291+	lincRNA-LGSN	lincRNA	12626	chr6	+	63073666	63086291	GAGGTTGAAATTGTTGATTTTCTCTTTCACGTCTTTCCCTTTGTCTCAAATATCCTACGT	intergenic							222.676	6.13661	7.75287
ASHG19A3L0000868	0.00770905	3.40259	down	32.1168	42.5435	21.3682	162.498	109.191	118.976	123.117	5.16163	5.59575	4.65545	6.78988	6.83284	7.26064	6.7336	noncoding	AF289584	lincRNA-NKD1	lincRNA	2142	chr16	+	50369047	50668127	TTTATATGTTGTGGGGACTGCATAACTAGCCCAGGAAATGACTCTGGTTTTGAGTGGCCT	intronic antisense	NM_013263	BRD7	bromodomain-containing protein 7 isoform 2	-	50352928	50402845	128.446	5.13761	6.90424
ASHG19A3L0000868	0.00770905	3.40259	down	32.1168	42.5435	21.3682	162.498	109.191	118.976	123.117	5.16163	5.59575	4.65545	6.78988	6.83284	7.26064	6.7336	noncoding	AF289584	lincRNA-NKD1	lincRNA	2142	chr16	+	50369047	50668127	TTTATATGTTGTGGGGACTGCATAACTAGCCCAGGAAATGACTCTGGTTTTGAGTGGCCT	intronic antisense	NM_001173984	BRD7	bromodomain-containing protein 7 isoform 1	-	50352928	50402845	128.446	5.13761	6.90424
ASHG19A3L0000868	0.00770905	3.40259	down	32.1168	42.5435	21.3682	162.498	109.191	118.976	123.117	5.16163	5.59575	4.65545	6.78988	6.83284	7.26064	6.7336	noncoding	AF289584	lincRNA-NKD1	lincRNA	2142	chr16	+	50369047	50668127	TTTATATGTTGTGGGGACTGCATAACTAGCCCAGGAAATGACTCTGGTTTTGAGTGGCCT	exon sense-overlapping	NM_033119	NKD1	protein naked cuticle homolog 1	+	50582240	50668641	128.446	5.13761	6.90424
ASHG19A3L0000705	0.00506226	2.15416	down	208.03	298.887	210.056	491.451	532.736	473.97	558.669	7.75084	8.22695	7.79552	9.09874	8.92362	8.96258	9.14132	noncoding	exon1607+	lincRNA-PPP2R5C-2	lincRNA	191	chr14	+	102051986	102052176	CACTTTCCCCATCCAAGCAATTCCATCTCTTTCCTCTTTCAGTGGCAGACTCTAACTGCT								514.207	7.92444	9.03156
ASHG19A3L0001619	0.00849717	2.65455	down	35.8209	83.3092	46.03	186.75	145.09	159.626	151	5.32081	6.49815	5.71787	7.10073	7.27823	7.47243	7.16492	noncoding	chr5:171991045-172004045-	lincRNA-SH3PXD2B	lincRNA	13001	chr5	-	171991045	172004045	TTTGCTTGTTTATTTGGCTTATAACCTTCTGGGATGTTCATCTGCTGGCTCTGTTCCCCC	intergenic							160.616	5.84561	7.25408
ASHG19A3A023197	0.00134618	2.04075	down	275.111	314.996	304.744	633.55	570.198	548.326	666.203	8.11706	8.30366	8.30453	9.36032	9.14494	9.34433	9.2338	noncoding	uc001czf.2	AK055150	UCSC_knowngene	1123	chr1	+	59250822	59365384	TATTCTCCCACAAAATCCAGAGCTGCCAAACACATCCTCCTCCATGAGTCTTGCTTTGTG	intergenic							604.569	8.24175	9.27085
ASHG19A3L0002138	0.0158534	2.09987	down	22.5031	23.3733	31.7085	72.6542	57.4269	85.4674	58.1071	4.65686	4.80212	5.20086	5.66087	6.33445	6.0525	5.77984	noncoding	BX110722	lincRNA-SGK223-2	lincRNA	397	chr8	-	8413247	8418475	TTTAATTGGTGGCTTTACTCAGCCATGTTTCTGTTTTTCAAACCCCGGAGTCAGTTGGAC	intergenic							68.4139	4.88662	5.95692
ASHG19A3A029873	6.79999e-05	3.71914	down	321.556	346.881	319.424	1115.83	1107.14	1139.15	1327.51	8.33893	8.43482	8.36582	10.4147	10.2547	10.2064	10.2234	noncoding	ENST00000373171	RP11-552E20.3	Ensembl	554	chr6	-	40312082	40313890	TCTAGGCCCTCTGATCCCTCTGTAAGTCGCTATTTCCCTTATTAAATCTCTTTCTGCTGG	intergenic							1172.41	8.37986	10.2748
ASHG19A3L0002759	0.0227653	2.14238	down	29.8132	30.5966	27.1106	73.2199	68.6362	55.2294	129.363	5.06051	5.15229	4.98718	6.85966	5.69258	6.06649	6.04477	noncoding	chr15:74197716-74198633-	lincRNA-TBC1D21-1	lincRNA	918	chr15	-	74197716	74198633	AGAAACAGACTGCTGAGTCGGCACATCCCTTTCTCAGGTTGATTTAAGAAGGGAGAATAA	intergenic							81.6121	5.06666	6.16587
ASHG19A3L0001652	0.0023009	2.09098	down	5.42104	5.89113	7.27042	20.5419	21.7683	16.6381	20.1854	2.78337	3.10005	3.20249	4.03797	3.87284	4.14193	4.31852	noncoding	chr5:41879793-41892193-	lincRNA-OXCT1	lincRNA	12401	chr5	-	41879793	41892193	TATTCACTGCATACTTATGGTCCTAGGCTGTGATCTTCAGAGTGGACTGCATACCCTGTA	intergenic							19.7835	3.02864	4.09281
ASHG19A3A022745	0.00944073	2.11391	down	33.3527	56.9449	37.9106	110.744	104.027	98.4122	110.925	5.21799	5.98209	5.45052	6.6294	6.54765	6.6825	6.66089	noncoding	ENST00000475886	RP11-129K20.2	Ensembl	758	chr3	+	62936104	63109888	AATTGTATCTTCTTGTAAAGCATACAGTCTTGGTGGTCCTACCCCATGAACTGGCTGTCC	intergenic							106.027	5.5502	6.63011
ASHG19A3L0002550	0.0082686	2.22189	down	25.4196	35.6907	23.5588	78.3333	79.5163	67.5755	80.8307	4.83814	5.36077	4.78514	6.15983	5.99449	6.17209	6.25949	noncoding	AI609057	lincRNA-LUZP6-1	lincRNA	417	chr7	+	135585964	135586381	AATAACTCTTCTCTTCCCATAAGGCCCATTTGTGTAGGGGAAGGTTCATGTCTGAGCTTG	intergenic							76.564	4.99468	6.14647
ASHG19A3L0002956	0.0138095	2.54758	down	11.2642	5.93214	5.71065	17.2065	37.828	23.496	36.6098	3.67917	3.13245	2.93264	4.96569	4.41022	3.8664	5.14655	noncoding	chr17:8905860-8924601-	lincRNA-PIK3R5	lincRNA	18742	chr17	-	8905860	8924601	ACTGAAGAGATAAAATAGAGGGAGAACTGTCGCCACTTAACACTAGGGGAATGCGTCATT	bidirectional	NM_004822	NTN1	netrin-1 precursor	+	8924858	9147317	28.7851	3.24809	4.59722

## Sheet: M1 vs T4
# Condition pairs: M1 vs T4 # Fold Change cut-off: 2.0 This table contains profiling data of all probes for lincRNAs based on John Rinn's papers (Guttman, M., et al. 2009, Khalil, A.M., et al. 2009). # Column A: ProbeName, it represents the probe name. # Column B: Fold change, positive value indicates up-regulation and negative value indicates down-regulation. # Column C: Log Fold change, log2 va…
	Fold Change and Regulation				Raw Intensities		Normalized Intensities		Annotations
ProbeName	Fold change([M1] vs [T4])	Log Fold change([M1] vs [T4])	Absolute Fold change([M1] vs [T4])	Regulation([M1] vs [T4])	[M1](raw)	[T4](raw)	[M1](normalized)	[T4](normalized)	type	seqname	GeneSymbol	source	RNAlength	chrom	strand	txStart	txEnd	probeSeq	relationship	Associated_gene_acc	Associated_gene_name	Associated_protein_name	Associated_gene_strand	Associated_gene_start	Associated_gene_end
ASHG19A3L0000337	2.49616	1.31971	2.49616	up	36.0878	19.7896	5.3287	4.00899	noncoding	W19582	lincRNA-ETS1-2	lincRNA	540	chr11	+	128050349	128053029	AGATATCTGGTTGAGACCAAGTAAGAGATAAACCTGTAGATTCCACTGTGCCACCACAGT	intergenic
ASHG19A3A000094	2.10763	1.07562	2.10763	up	1866.03	803.369	10.7186	9.64301	noncoding	ENST00000412736	MEG3	Ensembl	1670	chr14	+	101292454	101327308	TGACTTGAGTAAGAACACGAATTATGCATTACCACTCCCCTGCCCCAGGAGCCACTCCCA	intergenic
ASHG19A3L0003536	6.72617	2.74979	6.72617	up	649.912	104.163	9.2822	6.53242	noncoding	BE244504	lincRNA-FAM110A	lincRNA	447	chr20	-	837118	837565	GTGCTGTGTGTGTGGAAACCCAAATATGACCGTAGAGGGTGGAGCCACAAAACCAAGCTG	intergenic
ASHG19A3A027940	6.18651	2.62912	6.18651	up	142.038	28.9464	7.23384	4.60472	noncoding	ENST00000508179	CTD-2001E22.2	Ensembl	1799	chr5	+	9546311	9550721	CCAGGGTGTTATTTTCCGACATTGAGTCTTGTATATATCTTGAATGTCTATAAGCAAAGA	bidirectional	NM_003966	SEMA5A	semaphorin-5A precursor	-	9035137	9546233
ASHG19A3A034290	2.32598	1.21784	2.32598	up	85.1023	46.2118	6.53377	5.31593	noncoding	ENST00000436056	AC073115.7	Ensembl	532	chr7	+	46030503	46040497	CCTAAAAAATGGAAGCACAAACTGTACAACAAATACTCTCCATTCAAGTTGAAGTTCTCA	intergenic
ASHG19A3L0000453	4.15076	2.05338	4.15076	up	101.307	31.2721	6.77641	4.72303	noncoding	BC007632	lincRNA-RIMBP2-1	lincRNA	3902	chr12	-	130916193	131200826	AGAGATGACTTTTCTAGAGAAGAGTAGAAACACAGCGGCAGAAACACAGCTCTGCACTTC	exon sense-overlapping	NM_015347	RIMBP2	RIMS-binding protein 2	-	130880680	131002410
ASHG19A3A048668	3.62653	1.85859	3.62653	up	95.3311	33.6377	6.69221	4.83362	noncoding	AK022887		RNAdb	2629	chr12	+	54513394	54516023	AAAGACCACCCTTTTGTCCATCTTCTTCACATGGGTGGATGTGAGAAAAGTTTCTCTCCC	intergenic
ASHG19A3L0003312	2.08345	1.05897	2.08345	up	69.0288	42.2084	6.24012	5.18114	noncoding	BE796744	lincRNA-ZPLD1-1	lincRNA	961	chr3	-	104348945	104626311	TTTTTTAGCGACAGAAAATCTCACCCTATATCCAATGGGGGTTCACCACCATGATGGCGT	intergenic
ASHG19A3L0002225	2.54609	1.34828	2.54609	up	34039.9	10660.8	14.8027	13.4545	noncoding	BC036853	lincRNA-PDCD1LG2-2	lincRNA	1660	chr9	-	5357968	5630071	GGAGGTGCTCTAAATAACTTTTAGATTTCCTCTCTCTGTGTGCATTACCAATATCTAAGT	exon sense-overlapping	NM_018465	C9orf46	transmembrane protein C9orf46	-	5357966	5437937
ASHG19A3L0002225	2.54609	1.34828	2.54609	up	34039.9	10660.8	14.8027	13.4545	noncoding	BC036853	lincRNA-PDCD1LG2-2	lincRNA	1660	chr9	-	5357968	5630071	GGAGGTGCTCTAAATAACTTTTAGATTTCCTCTCTCTGTGTGCATTACCAATATCTAAGT	intronic antisense	NM_025239	PDCD1LG2	programmed cell death 1 ligand 2 precursor	+	5510544	5571282
ASHG19A3L0002225	2.54609	1.34828	2.54609	up	34039.9	10660.8	14.8027	13.4545	noncoding	BC036853	lincRNA-PDCD1LG2-2	lincRNA	1660	chr9	-	5357968	5630071	GGAGGTGCTCTAAATAACTTTTAGATTTCCTCTCTCTGTGTGCATTACCAATATCTAAGT	intronic antisense	NM_001135920	KIAA1432	protein RIC1 homolog isoform b	+	5629118	5769454
ASHG19A3L0002225	2.54609	1.34828	2.54609	up	34039.9	10660.8	14.8027	13.4545	noncoding	BC036853	lincRNA-PDCD1LG2-2	lincRNA	1660	chr9	-	5357968	5630071	GGAGGTGCTCTAAATAACTTTTAGATTTCCTCTCTCTGTGTGCATTACCAATATCTAAGT	intronic antisense	NM_001206557	KIAA1432	protein RIC1 homolog isoform c	+	5629118	5776556
ASHG19A3L0002225	2.54609	1.34828	2.54609	up	34039.9	10660.8	14.8027	13.4545	noncoding	BC036853	lincRNA-PDCD1LG2-2	lincRNA	1660	chr9	-	5357968	5630071	GGAGGTGCTCTAAATAACTTTTAGATTTCCTCTCTCTGTGTGCATTACCAATATCTAAGT	intronic antisense	NM_020829	KIAA1432	protein RIC1 homolog isoform a	+	5629118	5776556
ASHG19A3L0002225	2.54609	1.34828	2.54609	up	34039.9	10660.8	14.8027	13.4545	noncoding	BC036853	lincRNA-PDCD1LG2-2	lincRNA	1660	chr9	-	5357968	5630071	GGAGGTGCTCTAAATAACTTTTAGATTTCCTCTCTCTGTGTGCATTACCAATATCTAAGT	intronic antisense	NM_014143	CD274	programmed cell death 1 ligand 1 precursor	+	5450502	5470567
ASHG19A3A026163	2.0908	1.06405	2.0908	up	935.894	435.969	9.76947	8.70542	noncoding	BC034819		NRED	2882	chr4	+	153457444	153460292	GTGGCTTTTACTGTCAAAGATTGTGTAAGCTAAATTATCTGGCAAAATTTTGCTTTCCAG	intergenic
ASHG19A3L0001219	4.82805	2.27144	4.82805	up	138.214	35.585	7.19501	4.92357	noncoding	BX101700	lincRNA-TACR1-1	lincRNA	720	chr2	-	75555040	75555760	AAATGAATAGCTGATACTCCTCCTTCATCAGAGAACTTGTGAGGCAGAAAGCGGGGAAAG	intergenic
ASHG19A3A008475	2.29368	1.19767	2.29368	up	3516.13	1327.75	11.6127	10.415	noncoding	uc010wkl.1	DQ589083	UCSC_knowngene	1661	chr17	-	45126240	45127901	AACTCTGCTTAGGATTATTTCATTGATCCCCAGGGTCCAATTGCCCAGTGCTCAGTCAAA	intergenic
ASHG19A3L0001531	4.30013	2.10438	4.30013	up	1275.03	287.957	10.188	8.08364	noncoding	DN920247	lincRNA-SCARB2	lincRNA	527	chr4	-	77102106	77155656	GCCTATGTTTTTGAACAAGACCAATCTGTTGGAGACCCTAAAATTGACTTAAATAGAACA	exon sense-overlapping	NM_001204255	SCARB2	lysosome membrane protein 2 isoform 2	-	77079891	77135052
ASHG19A3L0001531	4.30013	2.10438	4.30013	up	1275.03	287.957	10.188	8.08364	noncoding	DN920247	lincRNA-SCARB2	lincRNA	527	chr4	-	77102106	77155656	GCCTATGTTTTTGAACAAGACCAATCTGTTGGAGACCCTAAAATTGACTTAAATAGAACA	exon sense-overlapping	NM_005506	SCARB2	lysosome membrane protein 2 isoform 1	-	77079891	77135052
ASHG19A3L0002146	2.54767	1.34918	2.54767	up	87.2297	43.2195	6.5674	5.21823	noncoding	DB239440	lincRNA-SLC7A13	lincRNA	578	chr8	-	87229854	87333375	GGCCAGCTGCCTTTGCTATTTAATACACTTAATAGTCACTCTTCTCCATTTACAGCTGTG	exon sense-overlapping	NM_138817	SLC7A13	solute carrier family 7 member 13	-	87226287	87242604
ASHG19A3A030636	3.46616	1.79334	3.46616	up	54.472	21.1377	5.9065	4.11316	noncoding	ENST00000454588	RP1-45I4.3	Ensembl	552	chr6	-	143360561	143363461	GGTCCAAGTCAATCATCTTTGCTTCTCTCACATTGTCATCGACATTTACCCCAGCATTAT	intergenic
ASHG19A3L0003378	4.10065	2.03585	4.10065	up	96.8942	30.4438	6.71577	4.67992	noncoding	BF116112	lincRNA-C5orf53-1	lincRNA	588	chr5	-	139527790	139528378	AATGTCTGTGTCCCCTATAAACCATGACTCTACACGGTGGCATTCTAAGGATGGCAGAAT	intergenic
ASHG19A3A036632	2.08079	1.05713	2.08079	up	25.2882	17.0344	4.83102	3.77389	noncoding	uc003xth.2	BC048118	UCSC_knowngene	1829	chr8	+	58256345	58277413	ATGGAATGACTGTGGTTTCCCCTGAAAGAAGCATCACTGATCTCTGCACAGGAGAAACAA	intergenic
ASHG19A3L0001781	5.19421	2.3769	5.19421	up	41.6937	11.6058	5.52485	3.14795	noncoding	BE877397	lincRNA-ZNF184-1	lincRNA	910	chr6	+	27375649	27376276	ATGAACTTCAGACATTCGGATTATAAACCTATGCCGACCCTGATATAATTGGCGCGCACC	intergenic
ASHG19A3L0002833	3.13896	1.65029	3.13896	up	5063.3	1394.94	12.1314	10.4811	noncoding	chrX:118607438-118617354+	lincRNA-CXorf56-3	lincRNA	9917	chrX	+	118607438	118617354	ATGGGACAAATCTTGGCTCAACAATATCATACTTTGCATTTCTCCCCCGAGTCACACACG	intergenic
ASHG19A3A039998	2.29204	1.19663	2.29204	up	411.931	193.711	8.67461	7.47798	noncoding	ENST00000426799	RP11-314A15.2	Ensembl	995	chrX	-	65041096	65042091	CTTCGCTCCTTAGCAGATGACAATAACCTGAATTTTCTATTTGCTCCTCTTAGCAAAAAA	intergenic
ASHG19A3L0001732	2.67436	1.41919	2.67436	up	36.0834	18.5697	5.32828	3.90909	noncoding	chr6:137421307-137441782-	lincRNA-IL20RA	lincRNA	20476	chr6	-	137421307	137441782	AAATTAGCAGAAGATTATGCACGGCCAGCTGTACCATGGAACTGCCCAGGTTTTATACCA	intergenic
ASHG19A3A046506	2.41748	1.2735	2.41748	up	63.9921	34.0915	6.12735	4.85385	noncoding	AF083120		misc_RNA	158	chr11	+	62321164	62321291	TACCAAGCTACCCTTACCAAGCTACGGGTGCAGGAAGCCTTTAGATGCCTCGCTCTCCCT	intergenic
ASHG19A3L0002482	4.77074	2.25421	4.77074	up	38.3468	11.6556	5.40931	3.1551	noncoding	AI432427	lincRNA-CA6	lincRNA	619	chr1	+	8906748	9229411	AATGGGTGGTGCCGCAGGAGAACTCATCTCAGTGGATTCTGCATTTGAATATGGAATACA	intron sense-overlapping	NM_001215	CA6	carbonic anhydrase 6 precursor	+	9005921	9035148
ASHG19A3L0002482	4.77074	2.25421	4.77074	up	38.3468	11.6556	5.40931	3.1551	noncoding	AI432427	lincRNA-CA6	lincRNA	619	chr1	+	8906748	9229411	AATGGGTGGTGCCGCAGGAGAACTCATCTCAGTGGATTCTGCATTTGAATATGGAATACA	intronic antisense	NM_024980	GPR157	probable G-protein coupled receptor 157	-	9164475	9189229
ASHG19A3L0002482	4.77074	2.25421	4.77074	up	38.3468	11.6556	5.40931	3.1551	noncoding	AI432427	lincRNA-CA6	lincRNA	619	chr1	+	8906748	9229411	AATGGGTGGTGCCGCAGGAGAACTCATCTCAGTGGATTCTGCATTTGAATATGGAATACA	intronic antisense	NM_207420	SLC2A7	solute carrier family 2, facilitated glucose	-	9063358	9086404
ASHG19A3L0002482	4.77074	2.25421	4.77074	up	38.3468	11.6556	5.40931	3.1551	noncoding	AI432427	lincRNA-CA6	lincRNA	619	chr1	+	8906748	9229411	AATGGGTGGTGCCGCAGGAGAACTCATCTCAGTGGATTCTGCATTTGAATATGGAATACA	intronic antisense	NM_001201483	ENO1	c-myc promoter-binding protein-1 isoform MBP-1	-	8921058	8931635
ASHG19A3L0002482	4.77074	2.25421	4.77074	up	38.3468	11.6556	5.40931	3.1551	noncoding	AI432427	lincRNA-CA6	lincRNA	619	chr1	+	8906748	9229411	AATGGGTGGTGCCGCAGGAGAACTCATCTCAGTGGATTCTGCATTTGAATATGGAATACA	intronic antisense	NM_001428	ENO1	alpha-enolase isoform 1	-	8921058	8939151
ASHG19A3L0002482	4.77074	2.25421	4.77074	up	38.3468	11.6556	5.40931	3.1551	noncoding	AI432427	lincRNA-CA6	lincRNA	619	chr1	+	8906748	9229411	AATGGGTGGTGCCGCAGGAGAACTCATCTCAGTGGATTCTGCATTTGAATATGGAATACA	intronic antisense	NM_001135585	SLC2A5	solute carrier family 2, facilitated glucose	-	9101426	9129887
ASHG19A3L0002482	4.77074	2.25421	4.77074	up	38.3468	11.6556	5.40931	3.1551	noncoding	AI432427	lincRNA-CA6	lincRNA	619	chr1	+	8906748	9229411	AATGGGTGGTGCCGCAGGAGAACTCATCTCAGTGGATTCTGCATTTGAATATGGAATACA	intronic antisense	NM_003039	SLC2A5	solute carrier family 2, facilitated glucose	-	9097004	9129887
[truncated: 1,306 more rows]

## Sheet: M2 vs T3
# Condition pairs: M2 vs T3 # Fold Change cut-off: 2.0 This table contains profiling data of all probes for lincRNAs based on John Rinn's papers (Guttman, M., et al. 2009, Khalil, A.M., et al. 2009). # Column A: ProbeName, it represents the probe name. # Column B: Fold change, positive value indicates up-regulation and negative value indicates down-regulation. # Column C: Log Fold change, log2 va…
[truncated: 1,235 more rows]

[truncated: 2 more sheets: M3 vs T1, M3 vs T2]
