# Supplementary material for: Long Noncoding RNA Expression Signatures of Metastatic Nasopharyngeal Carcinoma and Their Prognostic Value
Source: Biomed Res Int. 2015 Sep 13;2015:618924. doi: 10.1155/2015/618924 (PMC4584063; doi:10.1155/2015/618924)
Supplement: Supplementary file 1 — Table S01. The clinical information corresponding to the seven NPC patient samples used for microarray analysis. Table S02. Four different lncRNA members (LOC84740, ENST00000498296, AL359062, and ENST00000438550) were selected to verify their expression levels via QPCR. This table supply the primer sequences used for Real-time PCR of the four lncRNAs. Table S03. lncRNA Expression Profiling Data. A total of 33,045 lncRNA probes were used in our lncRNA microarray. Up to 30,610 lncRNAs were detected in all seven samples. Table S04. Differentially Expressed lncRNAs. A total of 8,088 lncRNAs were identified to be significantly differentially expressed(≥2-fold) between the metastatic and primary NPC tumors in the microarray. Among these, 3,778 lncRNAs were found to be consistently upregulated; 4,310 lncRNAs were downregulated. Table S05. HOX cluster profiling. In this study, we detected the transcripts in HOX loci, 477 transcribed regions were found. Among them, 257 were ncRNAs and 220 were HOX coding transcripts. Table S06. Differentially expressed IncRNAs at HOX locus. In the four randomly paired groups, the number of differentially expressed lncRNAs differed, but several lncRNAs displayed similar changes in expression. Compared with the NPC primary tumors, 70 lncRNAs were found to be differentially expressed in metastatic tissues; 51 coding transcripts were differentially expressed. Table S07. Rinn lincRNA expression profiles. A total of 4,199 Rinn lincRNAs were detected in this microarray analysis. Table S08. Differentially expressed Rinn lincRNAs. A total of 1,069 Rinn lincRNAs were found to be differentially expressed. Table S09. Enhancer lncRNAs profiles. A total of 1,598 enhancer lncRNAs were detected, of which 468 lncRNAs were differentially expressed. Table S10. Data for enhancer lncRNAs regulating a nearby coding gene. The differentially expressed enhancer lncRNAs and their nearby coding genes (distance < 300 kb) were presented. Table S11. Data for lincRNAs reg [file 618924.f1.zip › S09 Enhancer lncRNAs profiles.xls]

## Sheet: Enhancer LncRNAs profiling
Enhancer LncRNAs profiling (Entities where at least 4 out of 7 samples have flags in Present or Marginal). This table contains profiling data of all probes for LncRNAs with enhancer-like function (Harrow, Denoeud et al. 2006). # Column A: ProbeName, it represents the probe name. # Column B ~ H: Raw Intensity of each sample. # Column I ~ O: Normalized Intensity of each sample (log2 transformed). #…
	Raw Intensity							Normalized Intensity							Flags							Annotations
ProbeName	[M1](raw)	[M2](raw)	[M3](raw)	[T1](raw)	[T2](raw)	[T3](raw)	[T4](raw)	[M1](normalized)	[M2](normalized)	[M3](normalized)	[T1](normalized)	[T2](normalized)	[T3](normalized)	[T4](normalized)	[M2]	[M1]	[M3]	[T4]	[T2]	[T3]	[T1]	chrom	GeneSymbol	probeSeq	RNAlength	seqname	source	strand	txEnd	txStart	type
ASHG19A3A032313	24.5957	24.4993	23.2513	22.5114	24.5721	15.5602	46.961	4.78888	4.86083	4.76835	4.28277	4.49765	3.76003	5.34154	A	M	P	P	M	M	M	chr6	RP11-252P19.1	GAAACATCTTCCCAGAAAACAGACTACAACAAATCATTTCCCTGGTATGAAGGAATGAAG	1122	ENST00000435810	Ensembl	+	166189268	166167676	noncoding
ASHG19A3A031964	14.5959	8.03532	7.32624	49.0563	16.7368	15.5997	69.9944	4.04369	3.53682	3.21242	5.46447	3.91482	3.76468	5.93938	A	A	A	M	M	M	M	chr6	RP11-346D19.1	CCCTGCTGTCTTTATATGTACAACTTGCATTTTGCAAGAGTTTAGAAAGTTGTAACCTTA	597	ENST00000415883	Ensembl	+	113864995	113852319	noncoding
ASHG19A3A044751	49.0275	53.4411	50.3838	56.2516	77.5862	61.3013	78.4067	5.75914	5.8943	5.83866	5.66581	6.2249	5.84548	6.11007	P	M	P	M	M	M	M	chr11	AC068580.7	AAATGGCAGCGTTGTGGGTAAAATAACACCTCCTTCAGAGACATTGACATCCTCATCCCT	338	ENST00000449749	Ensembl	-	1799618	1798159	noncoding
ASHG19A3A031389	97.7969	101.595	86.9642	212.31	201.164	213.655	232.196	6.72716	6.77488	6.59983	7.66172	7.65685	7.71438	7.75009	P	P	P	M	M	M	M	chr6	RP11-513I15.6	GCCCTTGATATTAGAGAATATTAAAATCACACAGTTGTGGCAAAAATCACATTGTGGCTA	4785	ENST00000429998	Ensembl	+	34252266	34247481	noncoding
ASHG19A3A032510	128.364	173.53	128.048	219.92	197.631	232.03	230.848	7.09472	7.50122	7.12482	7.71645	7.63018	7.84195	7.74137	P	P	P	M	M	M	M	chr7	AC017060.1	AATTATTTCTGAACCTTCCCATCAGCCTTGTCTCTGATAGAATTGGCCTGTTGTGGACGG	442	ENST00000451792	Ensembl	-	17598533	17503068	noncoding
ASHG19A3A019269	8.72642	6.81538	6.16042	22.0651	19.6401	22.458	31.0505	3.33139	3.36675	3.01411	4.25208	4.16464	4.34077	4.71206	A	A	A	P	M	M	M	chr21	CR624487	AACAATAACATCCAGGGAGTTCGTTTCTTGAGCAACGACCAGCTCTTTGCATAGCACGAA	1542	uc002yyn.1	UCSC_knowngene	+	41102607	41099681	noncoding
ASHG19A3A034043	235.839	217.227	201.354	119.624	67.4674	70.8648	66.0125	7.92108	7.80487	7.74103	6.79526	6.02053	6.06897	5.85089	P	P	P	P	M	M	M	chr7	AC002480.4	CAGTTCCTATGATATGACTACCTCAGGGCAAGAAAGTCACTGTGTCCCTGCTACAACAAA	557	ENST00000439823	Ensembl	+	22631241	22629323	noncoding
ASHG19A3A050303	26.6712	24.3543	21.1117	36.7373	19.4835	12.3537	29.099	4.90809	4.85439	4.64066	5.0255	4.15617	3.38896	4.61275	A	P	P	P	M	A	M	chr13	RP11-159J2.2	CCACCGTGCTCTGCTGGACATCATTTAGCATATATGACAAGGTAACTGACGAAGGACAAT	387	ENST00000434832	Ensembl	+	75826148	75824615	noncoding
ASHG19A3A037042	30.892	30.8704	34.8645	169.952	164.064	166.673	165.912	5.10737	5.16513	5.32912	7.33064	7.34839	7.33908	7.23671	P	P	P	M	M	M	M	chr1	RP11-452J13.1	AGATTGTGGTGCTTGATGATGGAATGGTGCATAAATAAATAAACACGGGCTCTCAATCAA	779	ENST00000420807	Ensembl	+	193335083	193273874	noncoding
ASHG19A3A040083	597.345	611.97	519.374	153.43	149.865	155.308	152.41	9.16919	9.19558	9.01421	7.16903	7.21096	7.23504	7.11593	P	P	P	M	M	M	M	chrX	AK057701	ATCCCACTTGACAGTTTAGAAGTGGATTGATAATACTCTTCTGGCTTAAAACCCTTCTTC	2597	uc004ebr.1	UCSC_knowngene	-	73512435	73498208	noncoding
ASHG19A3A018856	94.19	81.8002	89.9705	141.529	144.441	133.054	168.246	6.67624	6.47375	6.64248	7.04836	7.15576	7.002	7.25759	P	P	P	M	M	M	M	chr21	AP000696.2	ATGGGTTTATCTTTTGGGACCAAGACATTGGGTCCCTACATGTTTTCCCCTACCCTTCTT	1133	ENST00000457669	Ensembl	-	38009331	38004978	noncoding
ASHG19A3A018364	178.949	150.842	165.456	163.532	246.533	152.047	245.909	7.54708	7.30926	7.47014	7.26974	7.97056	7.20089	7.84264	P	P	P	P	M	M	M	chr20	RP1-300I2.2	TTATGAAGCTGAGCGGCTTCTTTCTACTCTCTGTGAACATCCTCCTTTGCCTCTGAATGA	556	ENST00000461248	Ensembl	+	43861972	43859508	noncoding
ASHG19A3A029234	69.368	60.5124	62.6438	37.834	37.1417	44.9166	53.0187	6.24752	6.0627	6.1406	5.07186	5.11997	5.38544	5.5258	P	P	P	P	M	M	M	chr1	BX571672.1	TCATTCCAAGATTCCTTAAAATTCTGTAATTCTATGTCCTCTTGATTCTGTCTATAGAAA	614	ENST00000428930	Ensembl	+	143232318	143119060	noncoding
ASHG19A3A030631	848.168	822.065	827.526	640.561	992.538	690.709	1063.56	9.63249	9.59883	9.65878	9.3608	10.0731	9.49957	10.0731	P	P	P	M	M	M	M	chr6	LOC153910	AAGGTCTTAGCACTGTTTCATCTTCCCAGAAGGCTTTTCCCTCTTCCACCCTGCTTCTAG	2290	NR_027311	RefSeq_NR	-	142958973	142847591	noncoding
ASHG19A3A049735	21.2957	20.3429	10.8753	19.7026	27.9072	52.6002	25.3012	4.57522	4.62861	3.73298	4.07958	4.69117	5.62009	4.39787	A	P	A	M	M	M	M	chr13	RP11-477B16.4	TTTGGGTCTACTGGCGAAAGAGGAGAAAGACCTTTCTGCTGGGAAAATGCTGTCTCATAA	1844	ENST00000433569	Ensembl	-	95355116	95351947	noncoding
ASHG19A3A037844	27.7339	23.3996	24.406	52.709	28.3465	12.6904	27.5871	4.95747	4.80341	4.8363	5.57575	4.71637	3.42755	4.52493	A	P	P	P	M	A	M	chr9	RP11-217B7.3	TTTTTAACTGGCAAGGTTTCGAGTTCCCAACCACAGCACCCTCAGTGATGGTTTTCAGAA	606	ENST00000457720	Ensembl	-	107754062	107753076	noncoding
ASHG19A3A031643	406.953	395.084	333.545	706.43	663.294	689.605	695.803	8.65782	8.6161	8.4297	9.50645	9.47371	9.49602	9.43077	P	P	P	P	M	M	M	chr6	AK056584	CCCAGTCTTTGCTTTATGTACAAATACCCTGGTTTCTAAATGCTACTTATTTTCTTCAGA	3102	uc003pce.2	UCSC_knowngene	+	53862463	53794843	noncoding
ASHG19A3A013556	32.5658	19.3859	18.7356	132.538	409.337	110.2	453.963	5.18234	4.56737	4.4758	6.94892	8.72194	6.71296	8.77116	A	P	P	P	M	M	M	chr2	CR600703	AGAGTGAAAAAATGTTAAGCAGTGGAAAAACATGAACCAAACTGTGGCTGCATCTTCCCA	2156	uc002rsu.1	UCSC_knowngene	-	43266682	43254991	noncoding
ASHG19A3A052493	29.4265	18.7446	24.9224	61.154	21.9854	19.0758	26.0902	5.04211	4.52693	4.86458	5.79587	4.33192	4.08758	4.44167	A	M	P	P	P	M	M	chr15	AC103965.1	GTGTGTCCTTGCATGGCCTATGAAGTGTGTTGTGGGATAACCGTGTGTATTGAACTCTCA	2545	ENST00000400817	Ensembl	-	84898722	84868063	noncoding
ASHG19A3A015758	34.5733	18.6014	26.0951	61.5976	26.2254	15.7712	10.2442	5.26851	4.51771	4.93508	5.80716	4.59354	3.78494	2.97043	A	P	P	A	M	M	M	chr2	AC023115.3	AGACTTGAATGGACTGAAACCACCTGGTCACCACTAGAAGCTACATCAAGGAAAAGAAAG	1074	ENST00000452716	Ensembl	+	67523207	67313577	noncoding
ASHG19A3A042850	23.081	21.8148	10.2603	33.4361	18.6862	16.0613	45.588	4.69854	4.71216	3.65135	4.88474	4.09556	3.81652	5.29472	A	P	A	M	M	M	M	chr10	RP11-491H19.1	AAAGGTAGCTAGATGGAGGATGGTTCTCCTCATTCCGCAGATGATGAACTTGAAACCAGT	477	ENST00000441001	Ensembl	-	63581004	63541513	noncoding
ASHG19A3A043572	218.419	209.167	222.933	402.432	185.899	217.404	385.682	7.81429	7.75504	7.87009	8.6443	7.53612	7.74228	8.52229	P	P	P	P	M	M	P	chr10	RP11-554I8.2	TGACTTTTGGAAATCTGATTGACTGGCACACTCTCTCTGCCTCTTTCTTTCTCAACATTT	917	ENST00000417112	Ensembl	+	6780988	6779343	noncoding
ASHG19A3A018483	53.0883	40.5826	46.1523	34.5195	80.8599	47.9862	84.0322	5.86727	5.52835	5.72154	4.935	6.286	5.48309	6.215	P	P	P	P	M	M	M	chr20	RP11-560A15.3	TCAGGTGGAGTCTGTGGTTCCCATGGTTCCTAGAGTGAGGACTCATCCTGCCAGATGGAG	770	ENST00000366097	Ensembl	+	55697148	55689970	noncoding
ASHG19A3A015510	28.6519	14.2234	29.463	21.6984	33.9664	19.7057	50.9509	5.00526	4.18461	5.10198	4.22463	4.98392	4.13913	5.46154	A	P	P	P	M	M	M	chr2	AC012593.1	CTTTTCTGACCACGGTTTTCTGGAGTTTTTTCGTATGGAGTTTGTAAGCTTCCTGACATG	580	ENST00000453451	Ensembl	+	35388178	35024916	noncoding
ASHG19A3A029430	119.216	112.968	94.702	195.529	81.5043	128.096	89.5331	6.99744	6.91678	6.71191	7.54093	6.29958	6.94242	6.30591	P	P	P	P	M	P	P	chr6	RP11-359N11.1	TAGGCTCTGCAAATTTCATCCCCACCTTTGGCCCTTCAGGCCTAGGGCAAGTCACAGCTC	470	ENST00000455973	Ensembl	-	14231801	14230005	noncoding
ASHG19A3A032566	10.9686	9.57104	17.6357	27.1728	23.5863	14.6494	9.00108	3.64561	3.72362	4.39082	4.57729	4.43445	3.66678	2.78775	A	A	P	A	P	M	P	chr7	AC003985.1	TGGAGGCGACAGCACAGGCTTCTGATTAGTTCACACATCACTCACCAATTAGAATAGAAG	362	ENST00000414127	Ensembl	-	25366434	25360920	noncoding
ASHG19A3A012293	120.911	104.727	103.08	135.735	107.195	58.9371	81.7941	7.01595	6.81396	6.82818	6.98507	6.70528	5.78695	6.17477	P	P	P	P	M	M	P	chr1	RP11-286M16.1	TAAGAAGAATAACTCCCATTCCTCATGCATGAGACCCTCTGCTAAATGCTTCCTGTGCAC	385	ENST00000435973	Ensembl	-	230021499	230011296	noncoding
ASHG19A3A049628	73.8267	63.5875	60.7739	99.4566	73.386	54.4471	109.213	6.33962	6.13126	6.09932	6.52585	6.14	5.67255	6.60668	P	P	P	P	P	P	P	chr13	RP11-527N12.1	GCCTTTGCTACTCCTTGCTGACATTTGGAATTTAACTGAAGTGTCTTGTTAAAAAACATT	348	ENST00000439454	Ensembl	-	63801189	63757233	noncoding
ASHG19A3A040695	19.6379	5.36428	18.2186	13.8262	23.4801	17.8715	22.0363	4.46412	2.33947	4.43472	3.5124	4.42906	3.98458	4.18142	A	P	P	P	P	M	A	chrX	RP1-122K4.2	CCAGCTCCTTCTCTGGAGAAGTTAATTATCAAATCCTAGCAAGAAGGGCAAGTGGTGATG	696	ENST00000448948	Ensembl	+	13982023	13973511	noncoding
ASHG19A3A016139	58.191	82.6266	54.4086	43.3013	60.1888	55.2989	65.3526	5.99654	6.48729	5.94517	5.27327	5.84851	5.69445	5.83648	P	P	P	P	P	P	M	chr2	AC019100.5	ATATTGAGAAAAGCAGGCGCGCTTCCATTCAACTTCAACACCCTTTCCTGGAGTGGATAA	1875	ENST00000427208	Ensembl	+	108970255	108938693	noncoding
ASHG19A3A055251	29.4089	29.9393	23.326	34.3946	9.68552	5	7.47563	5.04118	5.12371	4.77342	4.92866	3.06522	2.32995	2.60525	P	P	P	A	A	A	P	chr9	BC017988	TGAGCTCTCCTCAGATTACAGATTGGGAGTGGCAAATCAAAGGCATTGCAGCCTCTTTCA	1311	uc004bcx.2	UCSC_knowngene	+	109367074	109213096	noncoding
ASHG19A3A014203	1553.31	1418.42	1465.85	384.213	624.352	385.229	727.969	10.4555	10.3368	10.4334	8.57004	9.37648	8.60129	9.49448	P	P	P	P	M	M	M	chr2	LOC541471	TTATAAATCTTCAATACATCCTGTCCCCCTAAAACGGCATCTGGGTCTTTTGAGGGTTAA	809	NR_015395	RefSeq_NR	-	112252692	112124590	noncoding
ASHG19A3A000365	44.0015	45.0889	30.0878	23.5508	46.6058	35.4678	40.8948	5.60381	5.67169	5.13135	4.35274	5.46257	5.02832	5.13443	P	P	P	P	P	P	P	chr14	AL163953.3	AGCATGTTGTCACCTCTCAATACATAAAACTACTGGAGGGTGGTTCCAAGATGGCCAAAT	562	ENST00000456100	Ensembl	+	54153976	53684429	noncoding
ASHG19A3A040079	142.18	119.076	125.338	181.714	129.994	133.845	127.956	7.23524	6.98753	7.09562	7.43479	6.99881	7.00917	6.84344	P	P	P	P	P	M	M	chrX	NCRNA00182	GCTTCCTTCTGTAAAATTTGGACTGTTTGTTCTTCCCATTATATTAATAGTTGCTTCAGG	2356	NR_028379	RefSeq_NR	-	73513409	73247970	noncoding
ASHG19A3A018524	42.2764	41.0523	37.4252	60.343	54.7871	45.5455	53.5886	5.54602	5.54428	5.43211	5.7749	5.70455	5.40555	5.54153	P	P	P	P	P	P	P	chr20	AK309218	GAGAAAAGACGTCCTTGCTGTGTTCCTGATATGAAGAGGAAAGCAGTCCTTCTCCATTAA	3684	uc010gjw.1	UCSC_knowngene	+	59228976	58713536	noncoding
ASHG19A3A036232	120.411	107.416	117.765	234.667	113.957	144.409	240.698	7.01142	6.84878	7.00822	7.82023	6.79824	7.12228	7.80898	P	P	P	P	M	M	P	chr1	RP11-317P15.3	AAGCTCCCACTAACACCTTACCACTCTCTACCATGTCAACTTATTTTATTATAACAATTG	259	ENST00000435492	Ensembl	+	182683679	182681996	noncoding
ASHG19A3A049461	13.1341	19.9447	12.1725	19.3988	19.9523	21.0263	24.4465	3.89443	4.60244	3.87948	4.05494	4.19199	4.23761	4.34682	A	A	A	P	P	P	P	chr13	RP11-196I2.1	CATAATCTGCCTAAGATCATTGCATTTACAAGTGACGAACCCACTGCACAAATTTTGGCA	521	ENST00000434565	Ensembl	-	38717369	38624953	noncoding
ASHG19A3A049685	48.9284	47.0633	40.2504	45.2351	40.4924	36.9785	51.8701	5.75588	5.73052	5.53023	5.34407	5.24833	5.09332	5.48932	P	P	P	P	P	P	P	chr13	RP11-318G21.2	CCTTTTTCCAAACTATAGCATAAATCACAGAAAAGTATCTCCTCATTTGTTTGGGATGAG	546	ENST00000452933	Ensembl	-	78564781	78563506	noncoding
ASHG19A3A038303	47.5206	30.4229	43.6318	44.2996	72.645	44.6204	105.515	5.71202	5.14488	5.64278	5.31236	6.12357	5.37613	6.55404	P	P	P	P	P	P	P	chr9	RP11-91N2.3	CTCTGAAAGAATCCAGTTATGGGAACACAAATTACCTCATCCTCAGTTTCACTTTAAAAT	206	ENST00000445631	Ensembl	+	2541635	2541096	noncoding
ASHG19A3A038676	40.6828	31.7851	29.6401	51.8288	39.6666	39.1248	32.6855	5.48921	5.2048	5.11249	5.55056	5.2171	5.17735	4.79162	P	P	P	P	P	P	P	chr9	LOC643648	CGCTAGGCGGGAGGCTGGAGCAGTAAGATGGCAGCCGGAGCGGTAGGGGGGTGGCTGGCA	1168	uc004ads.2	UCSC_knowngene	+	46833318	46763790	noncoding
ASHG19A3A030410	37.4948	27.5843	31.2807	34.4291	38.3674	28.2215	45.904	5.37908	5.01757	5.18217	4.93056	5.16924	4.68598	5.30448	A	P	P	P	P	P	P	chr6	RP1-124C6.1	CCATCTTTCCAAATCATCTCTGTCTGCAGTGACCATGTCTTAATCCTGAAGGAAAACAAG	524	ENST00000421737	Ensembl	-	113754623	113749741	noncoding
ASHG19A3A018723	36.5599	30.5528	39.5593	59.3611	66.34	62.2778	74.9635	5.34562	5.15032	5.50546	5.75047	5.99372	5.87047	6.04364	P	P	P	P	P	P	P	chr21	AF131217.1	TTGTGGAGTAAGTGAGTGGGCCTGAGTTGAGAAGATCCTGGCCTTGGATTTTAAAACTGT	900	ENST00000433310	Ensembl	-	30047170	29816869	noncoding
ASHG19A3A029872	8097.31	11200.1	8850.6	2259.38	8923.66	9651.58	10631.9	12.7881	13.2566	12.9806	11.2454	13.3104	13.3811	13.4476	P	P	P	P	P	P	P	chr6	RP11-552E20.1	AGGCTGTGTCTCCCTCCTCAGACTGAAGGATCTTTGTGATCAGATGCTGTGTCTATATCC	539	ENST00000444731	Ensembl	-	40243976	40239304	noncoding
ASHG19A3A025660	233.324	531.084	173.995	340.482	235.359	730.672	237.923	7.90683	9	7.54155	8.39055	7.89552	9.58467	7.79246	P	P	P	P	P	P	P	chr1	RP5-943J3.1	ATGAAGTTTTGCCATGAACGTAGATCCTCCCTTACAAATCCCTCCATTTTCAAACCCGAG	509	ENST00000432395	Ensembl	+	90256051	90254472	noncoding
ASHG19A3A023231	200.828	207.213	178.198	83.0758	75.6309	69.0633	54.808	7.70752	7.74435	7.57737	6.26243	6.18806	6.02735	5.57405	P	P	P	P	P	P	P	chr1	BC042048	CACCCAAGATGTCCGGCTGAAGTTCTTAACCATTACCTTACACTAATCAACAGCAACAAT	526	uc001czn.2	UCSC_knowngene	+	60254499	60238466	noncoding
ASHG19A3A018478	16.2931	8.23115	15.7038	16.4032	28.256	20.886	19.0828	4.18933	3.56369	4.23566	3.79173	4.71061	4.2281	3.94877	A	A	A	P	P	P	P	chr20	RP5-843L14.1	TTGCTGGAAATACCCCAGCCCTGAAGGTTGCTGGCAAAACCACCATTTAATTCAGAACAA	698	ENST00000434176	Ensembl	+	55171182	55152618	noncoding
ASHG19A3A049938	309.561	249.321	257.69	67.3475	52.55	61.8947	50.1364	8.28577	7.98738	8.06882	5.93744	5.63814	5.85921	5.43785	P	P	P	P	P	P	P	chr13	RP11-363G2.4	TGGTGTTGGGGGCAATAGGTTTGTGAATATTCTGTGGATATGTCCATGCATAGGTGTATA	533	ENST00000445646	Ensembl	+	23426991	23426134	noncoding
ASHG19A3A030636	54.472	27.7358	67.7614	77.3215	36.5053	19.505	21.1377	5.9065	5.02709	6.24654	6.152	5.09211	4.12234	4.11316	A	P	P	P	P	P	P	chr6	RP1-45I4.3	GGTCCAAGTCAATCATCTTTGCTTCTCTCACATTGTCATCGACATTTACCCCAGCATTAT	552	ENST00000454588	Ensembl	-	143363461	143360561	noncoding
ASHG19A3A029808	174.464	167.948	152.081	132.819	84.9957	101.584	125.015	7.51212	7.45314	7.36121	6.9525	6.35923	6.59325	6.80961	P	P	P	P	P	P	P	chr6		AGCTAAAGCAGTGACAGATCCACGTAGCCTCTTTAACCTCTTTATTATCTTGCCAAAAAA	2638	AK026168	NRED	-	34250085	34247460	noncoding
ASHG19A3A026277	17.8231	10.7254	17.4321	23.4973	23.0468	17.4301	36.927	4.32033	3.8498	4.37268	4.35001	4.40208	3.94509	4.97754	A	A	A	P	P	P	P	chr1	RP4-617C6.1	ATGGGGAGCAATAAATTATTGGCCTAATTCGTGCCTGGTTCCAAAGAAAAGGGGCAGTTG	2755	ENST00000424943	Ensembl	+	95944912	95940292	noncoding
ASHG19A3A032328	113.086	97.2887	72.823	266.642	97.3127	250.743	102.535	6.92283	6.71662	6.34842	8.01415	6.55867	7.96361	6.50679	P	P	P	P	P	P	P	chr6	RP11-514O12.2	TTGCGGTTTCTTCCTTGCTCCTTGCAGGTTATATTTGAAATGAATGTCAGAGCCATGCGG	627	ENST00000455390	Ensembl	+	167318323	167317185	noncoding
ASHG19A3A048980	66.3781	62.0774	50.134	152.476	28.4551	54.8419	46.4568	6.18433	6.09918	5.83245	7.16051	4.72313	5.68104	5.32365	P	P	P	P	P	P	P	chr1	BC043293	ATCGTCTGCTCCAGACAACAGCCTTTCCCTAGTTTATACCATTAACATTTTATTAATGGT	1824	uc001dva.2	UCSC_knowngene	-	106161557	106144775	noncoding
ASHG19A3A043893	63.9963	56.8809	41.9641	24.0125	31.1557	42.0062	32.192	6.12745	5.981	5.58858	4.38307	4.85875	5.28391	4.76883	P	P	P	P	P	P	M	chr10	RP11-292F22.4	GAGAGAGAAAAAAGTAAAAGAAAAGAAACCCAAAAGGGAAAATATAGCTAAGGTGAACTG	159	ENST00000453605	Ensembl	+	47566804	47556164	noncoding
ASHG19A3A031383	34.8029	21.562	26.7351	32.6531	33.1073	22.2799	27.713	5.27935	4.69942	4.96796	4.851	4.94444	4.32715	4.53127	A	P	P	P	P	M	M	chr6	AL832447	CCTTCCCTTGAAAATGTGTCTGCTGGGCAATGCTGAGCAAAATTCCACAAAGGAGAGAAA	6592	uc003oin.2	UCSC_knowngene	+	33885984	33878878	noncoding
ASHG19A3A014428	24.5016	21.6949	34.2579	76.904	30.5768	31.969	28.7812	4.78424	4.7058	5.30469	6.14405	4.83001	4.87305	4.59609	A	P	P	P	P	P	P	chr2	AC073928.2	AACCTGAACAGTCTGCTGAAGCACCTGATGTTTGGCCTTCCTGAATGTCATGTAATACGT	444	ENST00000417715	Ensembl	-	140889349	140861151	noncoding
ASHG19A3A000065	35.0854	26.9444	24.4562	43.8404	26.3903	12.5245	21.0595	5.29109	4.98818	4.83915	5.29547	4.60447	3.40757	4.10711	A	P	P	P	P	A	P	chr1	RP11-296A18.3	ACCACCTGGGAAGACAAGTAATCAGGTCCAGCTTCGGTGTGAGGCCCTCAATCCAGAACA	2366	ENST00000366181	Ensembl	-	51700768	51660766	noncoding
ASHG19A3A030461	28.0411	25.5465	39.6017	48.8545	28.4894	22.4885	23.0336	4.9726	4.91398	5.50718	5.45781	4.72442	4.34345	4.25112	A	P	P	P	P	P	P	chr1	LOC728855	TCGACTAATCGTGTTGTTCCACGTTAGAAACGCTTGCATTGCCTGACTCTGAAACCAGAA	1230	uc009wlc.2	UCSC_knowngene	+	149672983	149576452	noncoding
ASHG19A3A023200	42.9047	22.5834	35.4476	239.013	242.278	226.769	255.007	5.56715	4.75476	5.35254	7.84821	7.94257	7.80445	7.8997	A	P	P	P	P	P	P	chr1	RP4-794H19.2	CCAATTCTGATCACTGCTCTTATGGTTTGTAATACATTATTTTGGGTTTGGATGATCCTG	2273	ENST00000419531	Ensembl	+	59366668	59250831	noncoding
ASHG19A3A034004	320.645	353.698	340.698	256.498	310.384	270.397	337.845	8.33492	8.46115	8.45761	7.95816	8.30968	8.07641	8.31798	P	P	P	P	P	P	P	chr7	AC019117.1	ATAACATGAAGTGAAGTCTTCATCTCCATTCCCAACAGTCCCCATTCTACTTGCAGAAAG	837	ENST00000419463	Ensembl	+	17506288	17414490	noncoding
ASHG19A3A040875	26.5082	23.0105	38.8694	9.79014	10.9341	13.8925	23.2811	4.89967	4.78074	5.48467	2.9979	3.22859	3.57558	4.26926	A	P	P	P	A	P	A	chrX	RP1-154K9.2	CCTTGGAGCAGAAAGTGAAAGTGTTCTGGAGCCAAAAGTAGTAACAAAGATGGAGGGCAA	895	ENST00000411879	Ensembl	+	42558542	42111711	noncoding
ASHG19A3A049554	22.9754	23.5852	23.1906	14.491	25.8298	32.086	27.413	4.69156	4.81327	4.76386	3.59468	4.57043	4.87809	4.51675	A	P	P	P	P	P	P	chr13	RP11-165D7.3	TTTCATTATTTTCCTGAAGAATTACCACTACCCTTTGAGGTGAACCCCTAAGCTGGGATG	413	ENST00000452288	Ensembl	-	49147453	49144774	noncoding
ASHG19A3A030634	434.16	575.157	470.212	354.673	442.24	519.464	536.463	8.75056	9.10726	8.8832	8.4565	8.84945	9.06378	9.03058	P	P	P	P	P	P	P	chr6	RP11-439L18.3	GCAGCAACATCAGAAAGCCCCTCTGCTGTGCTTCAGGATCACTCTTATCACTGCATAAAG	783	ENST00000446115	Ensembl	-	143343090	143288169	noncoding
ASHG19A3A038531	1151.63	1685.27	942.402	817.065	388.841	1062.49	321.56	10.0463	10.5729	9.8304	9.73709	8.6443	10.1514	8.24512	P	P	P	P	P	P	P	chr9		GGTTCCTCCTCTGTGGCTTCCTGTGGCACTCCAAGTGGGAAGAAGAGAAGCTTGGAAGTG	964	BC042185	RNAdb	+	35647470	35646266	noncoding
ASHG19A3A038843	128.242	111.982	92.6785	55.2381	13.4399	25.8831	22.2548	7.09321	6.90717	6.6802	5.64076	3.55375	4.55497	4.1955	P	P	P	P	A	P	P	chr9	RP11-15B24.4	TCCTTTCCGTGCTGTGCTATCATTGTTCAGGTGCTAAAGTGAAATAAATGTGTCGTCTAA	599	ENST00000422010	Ensembl	+	85070140	85068259	noncoding
ASHG19A3A029809	2184.35	2001.27	1768.61	2027.86	1943.84	1769.96	2019.42	10.9429	10.8314	10.7071	11.0865	11.0539	10.8904	11.0159	P	P	P	P	P	P	P	chr6		GAGAAAATGATACCTCTCACCTTCAAATTAATCAAATAGTTTGTCCTTCTAGTCCCCTTA	2209	AK025759	NRED	-	34253191	34250999	noncoding
ASHG19A3A015507	52.6407	42.1989	27.8178	33.3301	48.0373	45.6837	47.6932	5.85476	5.58375	5.02283	4.87932	5.50641	5.40931	5.36508	P	P	P	P	P	P	P	chr2	AC009499.1	ATATTGACGCTGAGACCCATGGGATGTAGGAGTGCTGAGCACATTTGCAAGACATAAAGA	779	ENST00000366209	Ensembl	+	34522820	33931952	noncoding
ASHG19A3A017808	18.4167	19.8932	28.3198	21.0585	32.6354	34.5869	43.844	4.36662	4.59982	5.04657	4.17988	4.92562	4.98905	5.23892	A	A	P	P	M	P	P	chr20	RP5-1022J11.2	TCAAAAGCATCATTCAAGCCACAAGGCTCTTCTGTTCCTGGTAAAAGGCAGGCAGGAAAA	573	ENST00000416237	Ensembl	-	51117130	51104460	noncoding
ASHG19A3A041575	101.498	88.3177	80.7788	344.483	301.404	329.627	319.753	6.77925	6.57879	6.49559	8.41005	8.26903	8.36844	8.23909	P	P	P	P	P	P	P	chrX	NCRNA00086	AGACACTGACCGGAATGACATACTTTTCTGTGTGTGATTCACTGTGTACTGGTCAGCACA	2913	ENST00000417443	Ensembl	+	134559682	134555867	noncoding
ASHG19A3A039081	90.3939	77.3883	72.1499	111.916	72.1814	46.1961	61.9393	6.61332	6.39843	6.33413	6.69678	6.11371	5.4278	5.75623	P	P	P	P	P	P	P	chr9	RP11-308N19.1	TGTGTCTTAAGCTGGGTCATTGAAGTGGAATGTTTTCACAAGACCTCCTCCACTTGCTAC	1686	ENST00000435485	Ensembl	+	109367076	109040672	noncoding
ASHG19A3A055160	44.165	41.8716	44.0979	29.7028	33.5437	23.2322	18.1788	5.60965	5.57173	5.65958	4.70818	4.9645	4.39076	3.87767	P	P	P	P	P	P	P	chr2	BC035112	AGGAAGCAAGAACACCTCGAGACAGGAGGCATGGCTGGGAGGCCTCAGGAAACGTATAAT	3502	uc002rby.2	UCSC_knowngene	-	14541082	14368998	noncoding
ASHG19A3A049694	27.4346	13.1048	17.8522	26.6729	37.6349	29.1111	40.9394	4.94299	4.08808	4.40665	4.54706	5.13994	4.73353	5.13634	A	P	P	P	P	P	P	chr13	RP11-25J23.3	CTAGCAAATAGGTGTAAGTAGTCCCAGACTTTTTCTATGCATCTCAACTGCATTCTGCGG	348	ENST00000450187	Ensembl	-	80144983	80140880	noncoding
ASHG19A3A017418	36.3681	18.3829	36.147	45.2492	20.2146	11.75	8.79798	5.3383	4.50232	5.38285	5.3448	4.21195	3.30678	2.76077	A	P	P	A	P	A	P	chr20	HSPC072	AAGAGAGAAATCAACAGTAAACGCTGCACATCCTCTGTCTGGTAAATGTGCATCACTGAT	1574	NR_026883	RefSeq_NR	-	18775228	18768614	noncoding
ASHG19A3A055059	23.3697	10.4773	28.305	81.1432	29.0157	63.4566	34.9702	4.71602	3.82543	5.04607	6.22854	4.75356	5.90028	4.89485	A	P	P	P	P	P	P	chr1	AK125078	TGGAAAAGAAAACCCCATTTCCAAGGCTCATAGGTGAAGAGACTTTTGCCTTGTCTGAGA	847	uc001alp.1	UCSC_knowngene	-	5728315	5621768	noncoding
ASHG19A3A028350	84.4794	73.1618	66.1835	523.569	298.75	207.63	294.694	6.5231	6.32164	6.21125	9.06165	8.25748	7.67253	8.11951	P	P	P	P	P	P	P	chr5	PMCHL2	CCCTCCTTGGTTTACCTCCATCATTAAAAAACAACAATGACAACGACAACAAAAAACAAA	1917	ENST00000450213	Ensembl	+	70681621	70671612	noncoding
ASHG19A3A000151	20.3185	12.0948	18.3653	125.431	108.738	101.504	110.608	4.5124	3.99442	4.44697	6.87159	6.7259	6.59185	6.62541	A	P	P	P	P	P	P	chr9	CDKN2BAS	ACACCCGGCGGATAGAGAGAATTTTGACAGATTGGCTTCTCTCACATGGCAAGAAACATT	678	ENST00000421632	Ensembl	+	22118701	22046749	noncoding
ASHG19A3A018220	18.3258	15.3769	18.003	17.7268	32.3688	12.3266	42.8085	4.3607	4.27881	4.4196	3.91584	4.91382	3.38495	5.20262	A	M	M	P	P	A	P	chr20	BASE	GCCCTGTGATTAATAAATGGCTCTACAACCTGGACCAGCATGTGGTTAAAGAGTTGATTA	1203	NR_026760	RefSeq_NR	+	31798268	31781410	noncoding
ASHG19A3A007468	721.514	446.392	515.568	97.46	34.6382	5.5417	49.6223	9.4182	8.7798	9.00662	6.4957	5.01538	2.44686	5.42088	P	P	P	P	P	A	P	chr10	SFTA1P	TTCCCTGTGACCTCCTGCAAATAAGGGAGAGACAAAGAGAAGAGCAGAAGAACAGAAGAA	693	NR_027082	RefSeq_NR	-	10836877	10826401	noncoding
ASHG19A3A013555	41.5815	38.1987	41.7562	68.6986	37.3253	56.3316	39.9401	5.52148	5.45037	5.58203	5.9707	5.12796	5.72215	5.09532	P	P	M	P	P	P	P	chr2	AC016735.1	AAAGATGTCACAGAGAGTAAAATGAGAAAAATCCAGTAGCCCGTGCCCAGAGCAGTTCCT	400	ENST00000457457	Ensembl	-	43233380	43228461	noncoding
ASHG19A3A051092	356.912	353.67	301.485	521.23	302.753	299.444	325.755	8.48239	8.46055	8.28907	9.05393	8.27515	8.23543	8.26509	P	P	P	P	P	P	P	chr1	AX747132	GAAAAATGTGTCTTCCTTAATTTTTCCCATAAGAACCACCCTACTTCATGCCCTGTCTCT	1711	uc001eng.1	UCSC_knowngene	-	145373798	145372087	noncoding
ASHG19A3A030800	95.874	55.4393	94.6353	196.519	76.2744	49.7075	28.462	6.69963	5.94506	6.71041	7.54757	6.20021	5.53324	4.57754	P	P	P	P	P	P	M	chr6	RP11-347L18.1	GAAGAGTCTTAAATGCCTTCTTTACCCTTTTACTCCATGTCCATGCAGTCTACCTGCTTT	466	ENST00000434356	Ensembl	-	164769677	164767521	noncoding
ASHG19A3A050762	71.9061	75.4878	71.8156	205.525	186.821	188.668	198.284	6.30174	6.36517	6.3269	7.61343	7.54429	7.52734	7.51133	P	P	P	P	P	P	P	chr1	AL592494.1	GCAAAAACATGACTTTGCCAGCTTCTCTTACAATTTGTGAATCATACTTTTGAATGCCAA	426	ENST00000450546	Ensembl	-	121322322	121315743	noncoding
ASHG19A3A000147	615.161	575.49	635.933	637.081	818.066	568.201	947.148	9.21084	9.10813	9.29856	9.35288	9.77971	9.20122	9.89815	P	P	P	P	P	P	P	chr2	AC080094.1	TAACCCTGATACTCCCATGTCTCAAAAGTTCTCATTCTTCTCCTTCCTGCTGCCACATGA	201	ENST00000421181	Ensembl	+	17155764	17151300	noncoding
ASHG19A3A037201	44.415	37.3666	41.6671	177.568	26.5243	46.0078	55.1597	5.61613	5.42134	5.57907	7.39726	4.61156	5.42088	5.58317	P	P	P	P	P	P	P	chr9	CR627240	GTCAAGTGACTCTTAGCTTGCGCTGTTGTCATCCTCTCTGGACTATTGCTACATTTCTAG	4804	uc003zpr.2	UCSC_knowngene	-	23672385	23500689	noncoding
ASHG19A3A053272	87.4805	60.5157	89.9167	89.3529	159.138	115.685	198.429	6.57192	6.06279	6.64165	6.37269	7.30478	6.78646	7.51258	P	P	P	P	P	P	P	chr1	RP11-336K24.4	TGTCATCCATCTGCTGGCCCTTTGGACCACTCGGCCACTGGCATGCTTTCCAAGTCTGTA	420	ENST00000423422	Ensembl	-	155976861	155955165	noncoding
ASHG19A3A013665	32.5161	23.7844	33.1756	37.6257	55.3431	40.8016	80.8785	5.18012	4.82378	5.26176	5.06306	5.72021	5.2369	6.16058	A	P	P	P	P	P	P	chr2	DL231926	GATTGGATAAGAATCAGTCACCATCAGTTCCTAATGCATTGCCTTCAGCATCTAAACAAG	110	uc010ypd.1	UCSC_knowngene	-	56210211	56210101	noncoding
ASHG19A3A024647	11854.8	11840.9	11284.8	5690.05	5787.41	5836.63	6230.15	13.3236	13.3319	13.3057	12.6069	12.6675	12.6431	12.6731	P	P	P	P	P	P	P	chr4	AC092661.2	AGACATGGTGAATGCATCGACTGGAAGCTCCTTTTTCTCCACCTCTCTCAATACATTCCT	1663	ENST00000441170	Ensembl	-	118497329	118495666	noncoding
ASHG19A3A030420	3216.19	3229.35	3020.82	179.352	200.728	148.979	181.849	11.4939	11.5035	11.4714	7.41277	7.65374	7.17035	7.37886	P	P	P	P	P	P	P	chr1	FCGR1C	GCTCAGGCAAGGGAAAGCATCACTACACATCAGCAGGAATATCACAATACACTGTGAAAG	566	uc009wkz.1	UCSC_knowngene	+	149375252	149370546	noncoding
ASHG19A3A041331	22.3571	17.1121	14.4156	14.7471	11.9065	15.1409	16.5958	4.64758	4.4148	4.10976	3.62228	3.36191	3.71856	3.73167	A	P	A	P	A	P	P	chrX	LL0XNC01-237H1.2	ATATATTAACATACCAAGTAGTCTAGGAGCAGCCACTGGGCGAACACCAAACCTTGCATC	1133	ENST00000426528	Ensembl	+	102161086	102139341	noncoding
ASHG19A3A017439	45.474	38.17	40.4569	29.2315	36.4523	35.6877	34.2383	5.6522	5.44954	5.53816	4.68538	5.08968	5.03832	4.86172	P	P	P	P	P	P	P	chr20	RP11-23O13.1	GGTGGGAGCTGAAATCAAAGTATGCATTTGTATACATTCTCCTCAATCATCTGTCTCATG	390	ENST00000417696	Ensembl	-	20703034	20702316	noncoding
ASHG19A3A019617	269.274	234.989	245.613	215.944	304.181	159.363	324.646	8.08922	7.90928	8.00055	7.68588	8.28155	7.27412	8.25973	P	P	P	P	P	P	P	chr22	CTA-796E4.4	CACTGCCATCCCCACCTATTAAAATAATGGCATGAAAAATAAACAGCCTTTATGTACAAT	357	ENST00000434510	Ensembl	-	26559180	26557875	noncoding
ASHG19A3A018415	39.7906	36.8664	34.181	43.5808	47.5545	36.5702	55.5784	5.45917	5.40344	5.30151	5.28666	5.49071	5.07623	5.59475	P	P	P	P	P	P	P	chr20	RP1-66N13.3	GACATTCTAGAGCTAGAGAGTAAACCAAATTAGAGTTGTCTTTTCTGGGCTTCTTGTTAA	508	ENST00000420477	Ensembl	+	46995507	46983956	noncoding
ASHG19A3A032333	26.954	27.1382	18.9239	66.1971	63.9552	70.2856	79.877	4.92094	4.99723	4.49041	5.91265	5.94062	6.05793	6.14015	P	P	P	P	P	P	P	chr6	RP11-568A7.2	AAGAAAGAAAAGGCAAGAACGTCAGCGATGGCTCCACTGACTGATTAAGGCAAAGGAAGT	205	ENST00000439207	Ensembl	+	167659404	167655378	noncoding
ASHG19A3A012847	333.611	253.152	314.212	267.693	377.655	247.152	422.539	8.39317	8.00739	8.34535	8.02064	8.60061	7.94083	8.65694	P	P	P	P	P	P	P	chr1	RP4-580N22.2	CCCAAAAGAAGCTATGCTCGGGCCTTCCCATCGTCCCACTCAAGAGCTTTCTTCATATTG	190	ENST00000443207	Ensembl	-	236135125	236121178	noncoding
ASHG19A3A039316	110.204	111.597	115.854	450.186	192.867	167.498	212.442	6.88618	6.90252	6.98645	8.81718	7.59169	7.3465	7.61513	P	P	P	P	P	P	P	chr9	RP11-344B5.2	GGAGGAGCATGTGATTCCAGACCCTCCTCTCTGCAACGAAAGTGAGGTTGACACCTGCAG	583	ENST00000455981	Ensembl	+	132048007	132044736	noncoding
ASHG19A3A040607	34.4666	32.5025	30.5719	33.3981	24.0996	30.2475	36.1392	5.26387	5.23721	5.15218	4.88362	4.46788	4.79197	4.94783	P	P	P	P	P	P	P	chr1	RP11-449J1.1	GAAAATTTCTCCATTTTCCTGAAACTATTCTGCATCATAAAATTCATTGCAGGTGGTACC	423	ENST00000416908	Ensembl	+	224961043	224954601	noncoding
ASHG19A3A043527	63.4078	53.621	60.3416	65.6792	88.7293	62.4082	89.0168	6.11416	5.89924	6.08851	5.90052	6.4211	5.87368	6.29757	P	P	P	P	P	P	P	chr10	RP11-298E9.5	AATGTGTTTCCCAAGAAGCAAGTCTGGATTCATCTTATGTACACTCCTGGCCTGTCTCTG	597	ENST00000445932	Ensembl	+	3269599	3266007	noncoding
ASHG19A3A039845	43.4631	33.1557	40.0637	37.6742	53.0399	38.1128	55.8891	5.58662	5.26281	5.52375	5.06598	5.65172	5.1377	5.60312	P	P	P	P	P	P	P	chr1	RP11-478J18.2	ATGTAGGAAGCTTTGGATGATGTCTGCGTATCCTCAGAACAGTCTCCTAACCATTCCTCT	476	ENST00000451396	Ensembl	+	214159496	214139236	noncoding
ASHG19A3A043586	19.2802	14.3598	15.318	24.2725	12.2761	22.4668	20.3457	4.43783	4.19664	4.20245	4.39891	3.41432	4.34174	4.05126	A	P	A	P	A	P	P	chr10	RP5-1119O21.2	TTATGGCAATCATATATTACGTTCATTATCAGAGACTCTGGATCCTTTGTGCTTTTGTGA	901	ENST00000413941	Ensembl	+	8343630	8340859	noncoding
ASHG19A3A051793	105.945	73.9111	95.4381	143.857	93.4478	41.7714	68.6669	6.83399	6.33632	6.72336	7.0722	6.50209	5.27464	5.91326	P	P	P	P	P	P	P	chr14	BC148240	TAAGATCCAGCCTTTGTCATTTACTGGTACTGTGGTTTTCTTGTATCTGGCCTCCACCTC	557	uc010awi.1	UCSC_knowngene	+	101540920	101540363	noncoding
ASHG19A3A014121	94.3795	70.6244	75.5385	241.37	108.022	121.817	270.788	6.67924	6.27571	6.39833	7.86585	6.71631	6.86923	7.98929	P	P	P	P	P	P	P	chr2	AC108051.1	GCAGCATTTGTGAAAATACCTCCCGATCATCTTTCACAGGAATTCTTTCCAAGTGAGAAA	437	ENST00000431897	Ensembl	-	103600887	103583865	noncoding
ASHG19A3A040275	181.339	169.665	195.45	260.154	380.369	243.336	426.757	7.56382	7.46765	7.70151	7.98089	8.6122	7.91571	8.67252	P	P	P	P	P	P	P	chr1	BC045735	AAAGCAAGGGCAGGTCTCTGTGCCCCATCTCTAGCTTTTCCTCAACTTAGGCTTTATAAA	959	uc001hmu.2	UCSC_knowngene	+	221005768	221002596	noncoding
ASHG19A3A000092	41.7416	36.0452	39.0234	99.5778	32.901	40.1309	28.3852	5.52625	5.37335	5.49055	6.52756	4.9355	5.21453	4.57236	P	P	P	P	P	P	P	chrX	RP4-562J12.2	TAAAGTAATCCCTCTTTTTCCTGGGCTATACCATCTGGAACAGATGACTTCCAAGGACAC	2290	ENST00000412422	Ensembl	+	117991849	117973518	noncoding
ASHG19A3A039323	144.011	122.783	98.7796	224.016	206.904	227.981	218.074	7.24861	7.03191	6.76694	7.74666	7.69812	7.8128	7.6531	P	P	P	P	P	P	P	chr9	AK024177	CCAGACACTGAACTGCCTTTGGAAGCAAGTAGGAGCAACAGCGAAGGTTTGCTGGCTCAG	1670	uc004bxy.1	UCSC_knowngene	+	132275963	132251385	noncoding
ASHG19A3A013587	36.5788	25.7111	32.5539	35.1254	45.7631	29.8177	57.5385	5.34652	4.92131	5.23647	4.9611	5.43522	4.76997	5.647	A	P	P	P	P	P	P	chr2	AC016912.3	ACAAACAAACACAAACCCACTTTGCGTTCTGTGAGTGTGCATGTATGTTGGTCCCTAGGT	570	ENST00000418415	Ensembl	-	46621306	46619435	noncoding
ASHG19A3A048979	56.4756	67.3704	48.9896	28.9217	47.938	44.0647	51.3168	5.95359	6.20864	5.80279	4.67144	5.50382	5.35485	5.47246	P	P	P	P	P	P	P	chr1	RP11-251P6.1	CTGAGGAAATATGCATTGATCTTGCAGTACTTTTCTCCTCCAAATAAAAGTCAGTATGAT	410	ENST00000420901	Ensembl	-	106161540	106132315	noncoding
ASHG19A3A015253	83.461	93.0043	77.3395	105.301	126.173	128.58	125.6	6.50949	6.65663	6.43007	6.60968	6.95426	6.94673	6.81649	P	P	P	P	P	P	P	chr1	RP3-510D11.2	TGAGAACGGGGGACTCATTCCTCCGGCACTGGGAGAAGACGATTCTTTAGGAGGAGGACA	269	ENST00000412639	Ensembl	+	9243855	9242270	noncoding
ASHG19A3A013307	47.4776	37.89	39.3998	77.8972	29.8636	46.3925	34.218	5.71118	5.43983	5.50148	6.16434	4.79388	5.43264	4.86012	P	P	P	P	P	P	P	chr2	AC008278.3	ATTAACTTGTTATTCTAAGTAATCCTCTGTTGAAAGCTGTGAGCCGCCTGGGGTGGACGA	568	ENST00000431117	Ensembl	-	15820608	15808807	noncoding
ASHG19A3A031753	33.2706	24.8574	23.0987	49.0572	35.8097	23.756	34.7985	5.21417	4.88042	4.75943	5.46454	5.06478	4.4279	4.88712	A	P	P	P	P	P	P	chr6	RP1-232L24.3	AAATCAGTTTGTGTCCCTGAGTTGCTAAGTGGAGAAGAAACGTCCACCAACCAGGAAACA	474	ENST00000429444	Ensembl	+	80131022	80130013	noncoding
ASHG19A3A045233	22.1116	15.9795	17.3587	24.3144	16.7795	20.1144	22.7243	4.63043	4.32421	4.36814	4.40151	3.91803	4.17038	4.22737	A	P	A	P	P	P	P	chr1	RP4-669L17.2	CAATCCTGGGGCAGGGAGGGGAGGCCCAGCTGAGTTTGGATCATAATCCTGAAAGACACA	607	ENST00000450983	Ensembl	-	460480	453632	noncoding
ASHG19A3A049555	84.6083	70.3482	57.4757	87.2838	110.169	54.9007	130.706	6.526	6.26954	6.02106	6.33677	6.7474	5.68264	6.87584	P	P	P	P	P	P	P	chr13	RP11-165D7.4	CCTTTCTTCCCATAGCTTCCAGCCTGGTGGGGAATAAAGGAATTAAATAAGCAATTACAA	962	ENST00000425350	Ensembl	-	49152224	49151109	noncoding
ASHG19A3A046002	27.2427	17.802	26.6255	24.5449	42.1995	9.74277	54.8401	4.93527	4.4617	4.96246	4.41547	5.31192	3.03663	5.57495	A	P	P	P	P	A	P	chr11	AC108448.3	GAGAAGCCTGAGTGCTGGTGGCTGTAGGCTGCTAAACTGTAAATACAGATAATGTCCAAA	293	ENST00000455154	Ensembl	+	3211159	3210775	noncoding
ASHG19A3A007421	70.7751	79.2774	67.2655	69.5677	74.4559	84.913	73.9526	6.2795	6.43107	6.23693	5.9917	6.16353	6.32339	6.02187	P	P	P	P	P	P	P	chr10	LOC84856	CAGAGTACTCTTAAGCAATCCCTTGGCCAAAACCAGCAACTGATTTGGATACCATCAAGA	2322	NR_026827	RefSeq_NR	+	42990784	42970938	noncoding
ASHG19A3A024560	11.3394	14.4107	18.8278	19.5936	22.5014	28.7344	25.201	3.68929	4.20226	4.48405	4.07146	4.36868	4.71326	4.39311	A	A	P	P	P	P	P	chr1	RP11-93N20.1	CTACACTTTGTGTCCGTTCCTGTTCTATATCTTAATAATTTCTGGAAGACACTCTCTACT	339	ENST00000438619	Ensembl	+	75430802	75428997	noncoding
ASHG19A3A039193	55.6169	26.7915	31.7966	129.977	95.677	88.2857	106.582	5.93425	4.98086	5.2048	6.91871	6.53722	6.38254	6.57006	P	P	P	P	P	P	P	chr9	RP11-542K23.7	AAAGAGGGAAAATGAAATCCTGGCCCTATGGATACTGGGAAGCATACTCAAGTATCTCTG	830	ENST00000433572	Ensembl	+	125211256	125165685	noncoding
ASHG19A3A008001	53.0917	30.775	52.0261	48.1323	119.86	49.2093	97.3686	5.8676	5.15984	5.88363	5.43159	6.87449	5.52041	6.42762	P	P	P	P	P	P	P	chr17	AC104024.1	TTCAATGCCTCTGCTTTCCTATTTATAAATGGGCAGACTGGACCTGAAGTCCTGAAGGCT	2201	ENST00000428142	Ensembl	-	16884667	16879312	noncoding
ASHG19A3A044468	33.4236	15.6157	26.4859	24.6169	36.4844	25.1382	39.7092	5.22083	4.29847	4.95517	4.4205	5.09086	4.51159	5.08631	A	P	P	P	P	P	P	chr10	RP11-432B10.1	TTTGGAATAGCGGCATCAACAGCTACATGGACCTGCTTCTGGGAAAAACAAGTGTAACTG	528	ENST00000429110	Ensembl	+	109160994	109136307	noncoding
ASHG19A3A032483	42.5672	32.928	35.1684	54.7572	113.971	42.2915	137.504	5.55705	5.25431	5.3411	5.62887	6.79852	5.29391	6.96023	P	P	P	P	P	P	P	chr7		TGCTTGTTTGCTTTTGCTTTGTTTCGTTTTCAAACCATAGTAGTATATTGGGTCACCAGT	366	G36891	misc_RNA	-	13565122	13564756	noncoding
ASHG19A3A015714	76.7964	65.2817	62.9569	142.316	120.416	109.939	140.348	6.39511	6.16691	6.14742	7.05888	6.88178	6.71041	6.98824	P	P	P	P	P	P	P	chr2	AC093159.1	ACAAGAGGTGCCATGAGACAGTATATAGTTCATTTCCCCACCGCAAGAGTAAAGGGCTTA	424	ENST00000416845	Ensembl	+	62691205	62690261	noncoding
ASHG19A3A013359	43.5108	32.8351	41.3051	51.1088	86.8245	49.0433	103.119	5.58851	5.25028	5.56675	5.53228	6.38904	5.51605	6.51711	P	P	P	P	P	P	P	chr2	AK090620	AAACCACATCTGATGTCATTCCAATCACTGTGTGTGTCTGCACTTGTGGGTTGTCTGCAT	2098	uc002ree.1	UCSC_knowngene	-	21933495	21910305	noncoding
ASHG19A3A044191	52.1833	54.0467	59.4547	72.8174	100.089	69.1516	103.998	5.84263	5.90868	6.06692	6.05668	6.60053	6.02976	6.52958	P	P	P	P	P	P	P	chr10	RP11-36D19.8	GATGTCATCCAGCAACAGAAAGCTTGTCAAAATAGGAACCATTTCCATCCCTACCACTGG	339	ENST00000416657	Ensembl	+	82094182	82093526	noncoding
ASHG19A3A038371	19.4588	10.6432	18.7991	103.253	78.9899	71.8998	84.8504	4.45069	3.84179	4.48194	6.58037	6.25186	6.09209	6.22816	A	A	P	P	P	P	P	chr9	RP11-536O18.1	CTGTTTCAAGATTCCTGCGCCAGCTCCTTCGTTGTTATAGAAGTTGGACTAAATAAAAGG	477	ENST00000428006	Ensembl	+	13487510	13446524	noncoding
ASHG19A3A053693	30.4315	26.1731	27.1273	46.4216	30.0048	15.6364	34.1791	5.08801	4.94638	4.98802	5.37945	4.79988	3.76824	4.85819	A	P	P	P	P	P	P	chr1	RP11-85G21.1	GCTAATTTAGAAGTTCTAAGGTATTCTCCACCTGTAATCTATTGCTCCAGAATTCTGCAG	399	ENST00000449345	Ensembl	-	157206926	157202020	noncoding
ASHG19A3A050606	19.1383	25.7576	17.7513	54.4578	19.7047	23.9491	23.1854	4.42601	4.92335	4.39857	5.62122	4.16968	4.44136	4.26182	A	P	P	P	P	P	P	chr1	RP11-418J17.3	TTCACATCACGTCCTCTTTGCAGCTACTTTGGGAGGATTGAAAGCTACAAAGGACGTTTG	898	ENST00000457719	Ensembl	-	119869926	119802887	noncoding
ASHG19A3A032628	7625.24	7092.88	7769.74	3476.06	4861.7	3659.66	5126.27	12.7047	12.6193	12.7903	11.8722	12.3916	11.9458	12.3749	P	P	P	P	P	P	P	chr7	AC005154.5	GAAACGTAGTAAGTTTATGTTTTTAAGGTCTGCCCCTCCCTTCTTGCATTATATCATAAA	752	ENST00000454922	Ensembl	-	30625588	30624315	noncoding
ASHG19A3A034256	9.23159	5.23793	9.90054	29.3205	23.8653	31.7205	29.882	3.41071	2.33151	3.60478	4.68887	4.45192	4.8622	4.65303	A	A	A	P	P	P	P	chr1	RP4-799D16.1	AGCGTTCTCTAGAGCGGTGGATCCCAAATGCCATCTGAGGACCAGCAACAGCAGCAGCAT	490	ENST00000424084	Ensembl	-	25439610	25370197	noncoding
ASHG19A3A018032	171.56	164.521	148.1	104.598	158.019	124.616	178.645	7.48943	7.42776	7.32433	6.59964	7.29408	6.90263	7.35245	P	P	P	P	P	P	P	chr20	RP11-199O14.1	ATAACCAACATGGTGCTCATTAATTGGTCATGTGAGCACTAAGGATAACCACCCTCCCCT	1484	ENST00000415932	Ensembl	+	6509106	6427369	noncoding
ASHG19A3A038650	545.601	618.245	528.873	352.64	406.334	393.984	414.118	9.04164	9.21162	9.04024	8.44886	8.70865	8.63535	8.62477	P	P	P	P	P	P	P	chr9	RP11-160N1.9	AAGACAAAGCAAAGGTATGAAAGGAACACACATCCCTGACTGACTAGGAGGAACAGAGCT	719	ENST00000419207	Ensembl	+	44835521	44823712	noncoding
ASHG19A3A049724	15.4504	14.4215	9.14557	22.1889	16.2657	24.3491	24.8236	4.11817	4.20324	3.49929	4.25984	3.87109	4.46461	4.37076	A	A	A	P	P	M	M	chr13	RP11-51B13.2	CAGGAAATCTAAGGAAAAAGTTCAAGCTCTTAATCATTTCATACCCTTCTTGTTGCTAAC	431	ENST00000427717	Ensembl	-	91783661	91779866	noncoding
ASHG19A3A035157	67.7349	49.9006	67.9548	104.037	86.2803	87.6461	130.608	6.21396	5.80482	6.25092	6.59077	6.38064	6.37093	6.87506	P	P	P	P	P	P	P	chr1		TTTCCAACGCTTTCCTTTCCAGCCTCACTTAGGCACATTGCAGTTAAAGAATATGGCCAC	1871	AK057967	misc_RNA	+	173391465	173389593	noncoding
ASHG19A3A042626	113.537	87.459	126.457	141.579	245.216	138.965	275.626	6.92711	6.56632	7.10915	7.04904	7.9627	7.06285	8.01791	P	P	P	P	P	P	P	chr10	RP11-810B23.1	TTCCTGGAACTTTACTTCGGCCTCTTTCCCTGTAATGTGAGACAGTCTGATACATCTGCA	187	ENST00000412439	Ensembl	-	36378317	36378013	noncoding
ASHG19A3A030679	5	5.36229	5.62263	20.1477	19.6932	20.2664	17.7397	2.37766	2.3378	2.91449	4.11615	4.16848	4.18237	3.83634	A	A	A	P	P	M	P	chr6	RP1-111D6.2	GAGGATCATTTCAAAGAATCTATTCTGAGGAAGTGCCTTCAGCCAATCAAAAAGCTAAAG	562	ENST00000424421	Ensembl	-	149565137	149564434	noncoding
ASHG19A3A041185	33.4527	14.2297	22.4328	25.2854	51.1187	23.5035	56.1873	5.22247	4.18537	4.72232	4.4617	5.59552	4.41088	5.61122	A	P	P	P	P	P	P	chrX	TSIX	TCAGCTCTCTGCACTGCTTGTAGGAAGTATAATGATTTGGCAGATAGGAACAATGAAGAG	37027	NR_003255	RefSeq_NR	+	73049066	73012039	noncoding
ASHG19A3A049664	377.639	538.333	400.7	247.687	429.013	446.506	485.727	8.56093	9.01842	8.68224	7.90185	8.79566	8.83139	8.87753	P	P	P	P	P	P	P	chr13	RP11-30C8.2	TTGACAACTTGAGAACTGCGTTCAAGGAAAGTCTTTAACAATTCTCCTCCTCACCTCCAC	282	ENST00000443621	Ensembl	-	74120978	73987609	noncoding
ASHG19A3A033216	120.359	92.37	97.837	367.864	214.363	315.425	243.855	7.01077	6.64689	6.75669	8.50852	7.75279	8.30847	7.83053	P	P	P	P	P	P	P	chr1	AF088076	TAAAAGGCCAAACCTTTGCTCCAACTTTCTCCTTAGCTTCCCTTTGGATCTGGAAAGCTG	423	uc001fuu.2	UCSC_knowngene	+	159946734	159931073	noncoding
ASHG19A3A055257	66.6948	62.8417	73.2763	77.7636	140.67	79.0153	171.562	6.19046	6.11482	6.35811	6.16004	7.11744	6.21998	7.28894	P	P	P	P	P	P	P	chrX	AK057519	CTAAAGTAATCCCTCTTTTTCCTGGCTATACCATCTGGAACAGATGACTTCCAAGGACAC	2146	uc004eqv.2	UCSC_knowngene	+	117991706	117973518	noncoding
ASHG19A3A049512	24.0893	19.1095	16.5192	49.1313	54.3775	56.9767	59.8279	4.76092	4.5503	4.30504	5.46713	5.69306	5.73843	5.70244	A	P	A	P	P	P	P	chr13	RP11-269C23.3	ATTATTCTCCTCTATAGAGCCTCAAAAGTCAAGTCAAGTAGCAAGCACACTGTGCTCCAG	858	ENST00000432701	Ensembl	-	44980002	44974486	noncoding
ASHG19A3A030339	25.9977	13.8181	27.5962	5.93064	32.0701	36.2907	38.0938	4.87245	4.15199	5.0104	2.47815	4.89967	5.0629	5.02373	A	P	P	P	P	P	A	chr6	RP1-60O19.1	AAGACTTCTTCAAGGAGGTGCTCAAGCCATGTTTTGGAAAAGAGAACTCAAGGTCTGGCA	805	ENST00000428750	Ensembl	-	107235306	107165866	noncoding
ASHG19A3A014456	21.5325	10.9939	8.56212	24.3035	20.9721	23.7569	24.2114	4.59034	3.88084	3.40957	4.40086	4.26653	4.42797	4.32948	A	P	A	P	P	M	M	chr2	AC064865.1	AAACTAAAGGGAGCCTTAATACATTCACCCTATGTGAGACCAGCCAGAATGAGGACTCCT	348	ENST00000454965	Ensembl	-	146089415	146051844	noncoding
ASHG19A3A013239	86.2718	61.6399	70.0734	153.131	70.6386	130.857	56.264	6.55103	6.08862	6.29257	7.16671	6.08337	6.97436	5.61298	P	P	P	P	P	P	P	chr2	AC105253.1	TGTACAGACATAGAGCCCTTTCCACTTCCTTTTTGTAAGAAATAGTATTCTTTCCCACAG	4209	ENST00000448901	Ensembl	-	6515554	6506141	noncoding
ASHG19A3A050297	90.6363	49.3112	64.3822	908.195	940.9	908.398	988.143	6.61777	5.78778	6.17516	9.90068	9.99551	9.90306	9.96416	P	P	P	P	P	P	P	chr13	RP11-459P23.1	AGGTCTGTCCTTTTTAATGCTCACCACACTTGAGGTTTCTGTTCACACTTCAAAGGCTGT	3340	ENST00000419499	Ensembl	+	74834113	74805593	noncoding
ASHG19A3A041849	17.3175	11.9036	19.2813	5.82359	26.6083	25.1699	27.9355	4.27422	3.97783	4.51885	2.46454	4.61572	4.51306	4.54673	A	P	P	P	P	P	A	chr1	RP5-865N13.2	TCAGGTTTACAGTTCCTCCAATTCTCAGATCGCAGAAGAAGCATCTGGAAGGAAATGACC	818	ENST00000428673	Ensembl	+	232321389	232295836	noncoding
ASHG19A3A032192	29.5022	36.9232	38.8577	62.2012	25.7541	26.502	29.244	5.04554	5.40555	5.48424	5.82117	4.56545	4.59119	4.6213	P	P	P	P	P	P	P	chr6	RP1-12G14.5	AGGAAAGACACCCTACACTCTGCTTCTGCTTCCAAGTGGAGGCTTCTTTCATTTCTAAAG	378	ENST00000446392	Ensembl	+	149885085	149882287	noncoding
ASHG19A3A012508	53.0572	21.8151	21.5437	48.8867	33.6337	43.012	24.5241	5.8667	4.71223	4.66505	5.45905	4.9678	5.31731	4.35184	A	P	P	P	P	P	P	chr1	RP11-66A2.2	TGATATCTTCCCACTAATCCCAAGTCAGGAGAGAGAGAGAATGAAGATCCATTGCTGTAG	2042	ENST00000457698	Ensembl	-	232878461	232862999	noncoding
ASHG19A3A007980	3465.41	3578.36	2658.63	3954.76	3531.4	2333.92	3127.22	11.5954	11.6492	11.2826	12.06	11.9253	11.3006	11.6655	P	P	P	P	P	P	P	chr1	RP11-296O14.3	CCTCCCACCCCCAGTTAAAAAGGTAATACACCTCATTGAAATAATTTAAACTTTACAGAA	1815	ENST00000367716	Ensembl	-	173430501	173386931	noncoding
ASHG19A3A042242	38.1179	20.4637	29.5095	39.984	46.7492	33.0379	47.6878	5.40046	4.63793	5.105	5.15405	5.46578	4.92068	5.36475	A	P	P	P	P	P	P	chr1	RP11-527D7.1	TGGGCCTGGGGCCCGCAATCTACTCCGGAGGCTTTCCCACTGGGCAGGGTCGCTAGCAGG	473	ENST00000413994	Ensembl	+	241596792	241587697	noncoding
ASHG19A3A044210	765.503	754.209	818.052	607.856	1388.33	1409.34	1495.15	9.4924	9.4819	9.64072	9.27936	10.577	10.5676	10.5832	P	P	P	P	P	P	P	chr10	RP11-124L5.7	ATCCAGCCCCCATTCCTCACTTTTGTCCTACTGGTAATAAGACATTCATCGTGTATCTTT	674	ENST00000437892	Ensembl	+	86048751	86039746	noncoding
ASHG19A3A038094	51567.7	58154.4	50402.5	20906.6	22853.5	22402.3	23031	15.3857	15.5863	15.4459	14.539	14.673	14.6105	14.5843	P	P	P	P	P	P	P	chr9	RP11-216B9.7	TTTGTCCCAGCCTGGGGCTCCCCCTCTGGTTTCCTATTTGTAGTTACTAGAATGAAAAAA	334	ENST00000428643	Ensembl	-	131425857	131425412	noncoding
ASHG19A3A000076	22378.9	23042.1	20285.7	17936.5	18395.4	20567.5	19502.2	14.207	14.2785	14.1362	14.3215	14.3573	14.5067	14.3441	P	P	P	P	P	M	M	chr1	RP11-54O7.2	GCCAGACCCCCATCCCGCCAGGGTCACCAGctgggcatggtggcgcatgcctgtaatcct	443	ENST00000398216	Ensembl	+	850351	849550	noncoding
ASHG19A3A018539	70.1949	57.5169	61.3029	69.3095	37.8011	70.5354	52.956	6.26643	5.99557	6.11255	5.98443	5.14525	6.06214	5.52303	P	P	P	P	P	M	M	chr20	RP5-908M14.5	TTGGGGTGAGCATGCTTCCTGCTGGATGCTTCTCTATGTAAGCACCTGCCTGAGTGTCAG	477	ENST00000433121	Ensembl	+	61006568	61004603	noncoding
ASHG19A3A031571	78.1269	78.7397	82.3661	115.243	103.538	105.964	137.715	6.42148	6.42349	6.52331	6.7372	6.65421	6.65663	6.96242	P	P	P	P	P	P	P	chr6	RP5-1120P11.3	AAGTGATCACAAAATTTTCAACATCACAGTCTAAAATAAAAACCTGCCTCTTGTCTGCCT	1608	ENST00000455005	Ensembl	+	44045689	44041649	noncoding
ASHG19A3A041858	122.38	91.2166	114.239	153.522	160.588	134.486	178.856	7.03114	6.62838	6.96792	7.17002	7.31888	7.01476	7.35471	P	P	P	P	P	P	P	chr1	RP11-66A2.1	TGCTCAGCAAACAGAGAGAGACTATTCTTGTTCCCTGTGCCTAGGATGTGCTTGATGTAT	372	ENST00000430921	Ensembl	+	232857996	232853816	noncoding
ASHG19A3A040770	86.1213	69.1923	88.6643	78.7618	150.08	77.7882	168.42	6.5492	6.24555	6.62399	6.18116	7.21247	6.19876	7.25977	P	P	P	P	P	P	P	chr1	AK124056	TGAAGAGCCTTTCTGCAGTTCTGCATTGAACTCTTCATGTGGCCCCATCTAGTAATGAGT	1530	uc001hpe.1	UCSC_knowngene	+	225939945	225888305	noncoding
ASHG19A3A040046	156.263	172.234	161.142	149.638	98.1818	61.1648	107.481	7.36092	7.49032	7.43449	7.1316	6.57202	5.84301	6.58418	P	P	P	P	P	P	P	chrX	CXorf49B	GTCCATCCCCCAAGACCGGAAAGGCAGCAATAGCCCCCGGGAGCCCAGGGCTGTCCTCGG	697	ENST00000422194	Ensembl	-	70885603	70882844	noncoding
ASHG19A3A038554	96.7807	52.687	93.7424	87.0783	47.1116	55.4522	53.4242	6.71395	5.87822	6.69678	6.33349	5.47709	5.69892	5.53692	P	P	P	P	P	P	P	chr9	RP11-84P7.2	GGTAGTTCCTACACAGCTTGATTTTCTTAACACTAACAGCAGTCTTCTGCCCTTCCAACA	504	ENST00000417311	Ensembl	+	36315276	36307038	noncoding
ASHG19A3A013387	100.807	93.0347	87.5853	369.999	425.327	420.455	450.826	6.7704	6.65707	6.60944	8.51616	8.78142	8.73533	8.75897	P	P	P	P	P	P	P	chr2	AC012074.2	AAACGCAATCGCACAAAGCAATTGTTCAGCACCAAATATGGGGGACAGAAGAGTGCTAAG	419	ENST00000431557	Ensembl	-	25598714	25592041	noncoding
ASHG19A3A039167	126.605	131.686	128.474	198.063	204.879	142.844	268.639	7.07575	7.12801	7.1303	7.56104	7.6834	7.10413	7.9761	P	P	P	P	P	P	P	chr9	RP11-127L21.1	AGGGTCAACTCAATAATATGTCTTTACAATCCCTTTTTCTCTGTCTCTAACTTCCTTCAG	256	ENST00000456032	Ensembl	+	121507590	121502840	noncoding
ASHG19A3A031463	49.6189	33.626	37.517	207.172	213.218	191.942	204.492	5.77404	5.28001	5.43573	7.62564	7.7427	7.55387	7.55934	P	P	P	P	P	P	P	chr6	RP1-153P14.5	GTGCTGGGCACTGGGCTACACAACGGACACTGAATACTTTCCATAGACAACCCTGCACGA	442	ENST00000414875	Ensembl	+	37518636	37517779	noncoding
ASHG19A3A030896	142.65	153.829	125.824	384.474	149.98	282.413	238.933	7.23749	7.33671	7.10016	8.57135	7.21153	8.14204	7.79902	P	P	P	P	P	P	P	chr6	RP1-40E16.2	ATTGGTTCATTCATTCGTTCATTTTGCTGTAACTCACAGTGGCCCCCATCCTAAGGTGCA	398	ENST00000433761	Ensembl	+	3056995	3056123	noncoding
ASHG19A3A015174	30.8844	28.5481	43.5653	46.3743	26.3849	21.0664	30.8518	5.1068	5.06306	5.64113	5.37747	4.60421	4.24083	4.701	P	P	P	P	P	P	P	chr2	AC144525.1	ATGTCTGAACACTGGGACACCAGTTCTCCTCCAAACATCTTGGACTACTTAAATGCAAAG	592	ENST00000441444	Ensembl	-	239698357	239697288	noncoding
ASHG19A3A014286	14.7093	21.5934	25.8157	27.8176	29.4852	19.6285	38.6435	4.05263	4.7009	4.91897	4.6114	4.77474	4.13293	5.0454	A	A	P	P	P	P	P	chr2	AC114813.1	TCTGTCATCTATTCAAATGTCAAAACCTTTTCCTGGAAGAATGTGCTACACCTGCTGCAG	624	ENST00000455174	Ensembl	-	126875562	126867675	noncoding
ASHG19A3A019526	11.8716	9.16761	12.8417	83.876	74.7974	96.8479	111.121	3.75138	3.67564	3.95547	6.27783	6.17097	6.52227	6.63274	A	A	A	P	P	P	P	chr22	KB-1183D5.13	GCTCCAAGGAAGGGACTCTCTACATATCTACATTGTTTGCAGATTTTACAATAATCATTT	3215	ENST00000447720	Ensembl	-	21679331	21655278	noncoding
ASHG19A3A043463	10.8227	10.2253	11.5036	20.422	18.2769	15.7205	23.4425	3.62698	3.7994	3.80941	4.13424	4.05459	3.77908	4.27855	A	A	A	P	P	P	P	chr10	RP11-432J24.6	CCTCCTAGTCCATGTAAGAGAAGATAAGTTTATGGAACAAACCCAGTATTTACTTAACTT	1623	ENST00000445190	Ensembl	-	134335953	134334330	noncoding
ASHG19A3A030722	48.365	48.6449	56.1386	101.353	103.729	114.441	106.163	5.73753	5.77052	5.98965	6.55227	6.65698	6.76931	6.56413	P	P	P	P	P	P	P	chr1	RP11-54A4.8	CTCTTAATGTATTTCTGCACTCTACACTAGCAGCCTATTACACAGGACACTTGGATGTCT	566	ENST00000416894	Ensembl	+	150490508	150488232	noncoding
ASHG19A3A032364	101.455	92.9565	84.4722	274.721	237.742	291.101	278.682	6.77899	6.65527	6.56063	8.06093	7.91012	8.19131	8.03364	P	P	P	P	P	P	P	chr6	XX-C2158C12.2	CAATTTGGAAGAAAACATTTCCATCTGTTAATAAAGAGCAAGGGCCTCTGGTCATAAGTG	758	ENST00000438217	Ensembl	+	171037576	171034284	noncoding
ASHG19A3A040334	35.2567	26.7145	29.5025	63.3836	43.9227	45.5726	60.4673	5.2985	4.97673	5.10443	5.84992	5.36942	5.40603	5.71832	P	P	P	P	P	P	P	chrX	GS1-421I3.2	ATGAAAGCAATTGGTCAGAGTAGCCACTCTGAAACCTGCCTCAGACCTTGGATACTTTGT	772	ENST00000454625	Ensembl	-	119149501	119144674	noncoding
ASHG19A3A032178	1574.02	1429.4	1547.01	1699.39	3049.6	1724.37	3049.11	10.475	10.3469	10.5129	10.8305	11.7131	10.8492	11.6292	P	P	P	P	P	P	P	chr6	RP3-337D23.3	TAACAGTGCTGGACCTAAAAAAGGTGTTGGCCCACGAGTGCCTCTCTCTCCCTGCCTGAG	453	ENST00000359838	Ensembl	+	147502128	147480060	noncoding
ASHG19A3A029850	119.28	80.8641	109.177	204.646	83.8697	117.731	198.332	6.99782	6.45783	6.90922	7.60768	6.34003	6.81732	7.51191	P	P	P	P	P	P	P	chr6	RP1-153P14.3	ATAGTAACAAATGGGCATGTTTGCTGCCTCCAAAGCTGTGGTGTCCCTGGATAAATAGAC	735	ENST00000445172	Ensembl	-	37514531	37511328	noncoding
ASHG19A3A044558	32.328	19.3478	28.3786	53.2619	49.7935	50.5764	55.034	5.17138	4.56553	5.04927	5.58999	5.55958	5.55971	5.57957	A	P	P	P	P	P	P	chr10	RP11-319I23.2	AAACAATCAAAACTGCTTTGGGGATGAGGATGAAGTTGGGACATTACTGCCTTGTATACC	488	ENST00000415417	Ensembl	+	120124615	120117070	noncoding
ASHG19A3A013313	19.0406	17.0973	23.3787	57.1483	54.3497	42.6603	46.6498	4.41924	4.41359	4.77686	5.68882	5.69275	5.30765	5.33065	A	P	P	P	P	P	P	chr2	AC010745.3	TCAACAAAGGAAAGGAACCAAATTACCCGGGCGGCTTTGGCAGGCTGCACCACTGTCAGC	415	ENST00000439745	Ensembl	-	16409462	16408294	noncoding
ASHG19A3A039249	622.278	595.158	586.273	370.492	387.773	312.331	313.179	9.22617	9.1544	9.18012	8.51861	8.63973	8.29365	8.20921	P	P	P	P	P	P	P	chr9	RP11-205K6.2	AAGGGATTCCACCCCCCATTCCAAGTCCCCTCCAAAAATATATATTGAAAGAAAACAAAA	339	ENST00000425153	Ensembl	+	129292622	129289896	noncoding
ASHG19A3A030387	29.2275	30.3468	34.0113	57.9557	61.5848	63.0643	59.0225	5.03163	5.14147	5.29355	5.71257	5.88296	5.8921	5.68451	P	P	P	P	P	P	P	chr1	LOC388692	TGACTGTGGTACCATCGCTTTGACGTCCTAGTGCTGATTTTTACACCTGCATTCTGCTTA	12267	NR_027002	RefSeq_NR	+	149291742	149279475	noncoding
ASHG19A3A032388	41.5083	67.3585	52.2761	34.3722	152.887	55.4452	56.3532	5.51847	6.2084	5.89092	4.92768	7.24314	5.69872	5.61527	P	P	P	M	M	M	M	chr7	AC102953.6	CAGTGGCCCCATAGCCCACGTCCACCGGAGCCACAGGATGGGAGCTTATTTGCAAACAAG	242	ENST00000416100	Ensembl	-	1549063	1548290	noncoding
ASHG19A3A022259	80.2208	73.3835	59.3473	65.9611	60.2215	73.9581	60.5185	6.45797	6.32587	6.06435	5.90585	5.8493	6.1289	5.7198	P	P	P	P	P	P	P	chr1	RP1-18D14.4	TATAGAGCCAATTTTACCGGCAAAGGAATGGAAGATCTGAAAGGCTAGGCGATCCCACAA	479	ENST00000429328	Ensembl	+	47645829	47644921	noncoding
ASHG19A3A039315	45.5101	45.0428	43.5468	86.6513	23.2097	67.8481	53.8062	5.65351	5.66989	5.64057	6.32644	4.41256	6.00083	5.54616	P	P	P	P	P	P	P	chr9	RP11-344B5.3	TCCATTCGCCTATCCATCCTACAGCAGCGACTGCACCCCTGATTGTGATGACGAATGCAC	395	ENST00000435157	Ensembl	+	132023860	132021340	noncoding
ASHG19A3A029330	35.6096	32.1824	37.0886	52.3536	45.8589	35.6997	46.0045	5.31158	5.22345	5.41787	5.56579	5.43785	5.03917	5.30702	P	P	P	P	P	P	P	chr6	RP1-40E16.3	CAGCTGGAGATAAGGAGTGGGCCCTGGAAGATGCTCAGTCAGGCCCTGCTCCAGATTTTA	335	ENST00000455327	Ensembl	-	3053987	3051334	noncoding
ASHG19A3A010729	117.3	96.2263	98.6826	107.085	109.395	91.0853	136.755	6.97332	6.70225	6.76541	6.63379	6.73669	6.43124	6.95236	P	P	P	P	P	P	P	chr18	AC100848.1	ATTTGCTACAGCTCCCGTTATGGTGCCTTTAGAAGAAATAAAGATCTCCTGCCTCACTTC	637	ENST00000417298	Ensembl	+	61826528	61814442	noncoding
ASHG19A3A030191	990.538	566.241	1085.42	796.853	1461.27	485.848	1485	9.84905	9.0864	10.0233	9.69737	10.6459	8.96375	10.5758	P	P	P	P	P	P	P	chr6	BC038576	TTGTAGTTGGTTTTTGAGTCTCCAGCTTCACCTCTCAACTCCTGCCACTTTATGGAACAC	553	uc003pji.2	UCSC_knowngene	-	82523909	82523004	noncoding
ASHG19A3A031704	546.131	506.393	442.95	527.587	120.092	472.752	188.853	9.04291	8.94129	8.80878	9.07298	6.8769	8.91806	7.4323	P	P	P	P	P	P	P	chr6	RP3-331H24.4	GCAGCCCTTTAAGTTGGGTTCACCTATCCCACCCTATTCCTGTATCTATTTTATTCTATA	352	ENST00000456795	Ensembl	+	72039509	72038644	noncoding
ASHG19A3A040076	16.4266	11.8877	25.5555	416.725	427.946	455.702	429.851	4.19985	3.97611	4.90178	8.69975	8.79204	8.86374	8.68516	A	A	P	P	P	P	P	chrX	XIST	TTCGTAAATTAAATAGGTCTGGCCCAGAAGACCCACTCAATTGCCTTTGAGATTAAAAAA	19271	NR_001564	RefSeq_NR	-	73072588	73040494	noncoding
ASHG19A3A016747	24.1655	14.3393	16.9245	31.4575	20.8165	33.6076	40.309	4.76543	4.19537	4.33717	4.79878	4.25526	4.94565	5.11058	A	P	A	P	P	P	P	chr1	RP11-276H7.3	TTATAGTGACATAATCAGCCCTAATGGAGATGGAATTACCCCATAAAGGCCCCAAGGAGC	544	ENST00000426353	Ensembl	+	16488378	16485760	noncoding
ASHG19A3A031050	172.794	171.462	160.091	44.0799	23.8805	25.1379	44.3781	7.49813	7.48471	7.42562	5.30416	4.45251	4.5115	5.25757	P	P	P	P	P	P	P	chr6	FLJ22536	AAAGTGTCCGAACGCCTCGTGGACTGCAGCGGGGGAAATGTCCCTTAAAAGTGCGACGAA	1904	NR_015410	RefSeq_NR	+	22194614	21666674	noncoding
ASHG19A3A030277	59.6726	49.5618	52.2207	67.5595	103.233	79.784	112.574	6.03003	5.79558	5.88987	5.94263	6.64794	6.23463	6.65076	P	P	P	P	P	P	P	chr6	RP1-177I10.1	AGATAGACCCCCATTCCATGGAATCCAATATTCCCAGACATTATCCTCAATATGTGTCCT	442	ENST00000434493	Ensembl	-	92102718	92100030	noncoding
ASHG19A3A035264	18.1837	14.6316	14.8525	16.3773	22.1097	12.1304	23.7961	4.34964	4.221	4.15717	3.78891	4.34009	3.35711	4.30318	A	P	A	P	P	A	P	chr1	RP5-1198E17.1	ACATAATAGGTCATGGTGGTCACATGAAAAGTAAAGGGTAACCGATTGGGGTAGGTGGTG	853	ENST00000416578	Ensembl	+	173833079	173831289	noncoding
ASHG19A3A018432	38.43	40.8151	35.997	34.6109	40.0501	48.2765	39.864	5.41226	5.5361	5.3774	4.93975	5.23162	5.49108	5.09321	P	P	P	P	P	P	P	chr20	RP11-112L6.3	TTCATTTGTACTCACTAGCAGAGGGATAAGATTACTCTTTGACTCATCCGGCCCTCCAAG	733	ENST00000435301	Ensembl	+	48782639	48780000	noncoding
ASHG19A3A034781	44.5738	44.486	45.2818	76.9826	52.3529	22.5596	46.3669	5.62093	5.65235	5.69534	6.14526	5.63329	4.3477	5.32081	P	P	P	P	P	P	P	chr1	RP1-79C4.1	TATGGGCAATAAGAATGTTTTAATCCTCACTTCTTGTGCTGTCTGACTCAGTATTTATAC	1923	ENST00000413005	Ensembl	+	170616480	170567994	noncoding
ASHG19A3A011377	60.3552	83.5626	71.0867	57.6936	175.389	117	110.675	6.04265	6.50209	6.312	5.70469	7.44912	6.8068	6.62616	P	P	P	P	M	M	M	chr1	RP11-191N8.2	ATTTGATGAATGAAAACTCCTCACTTGTGCTCTGGTGGTGTTTTAGGACAATGGGCCCCT	423	ENST00000431729	Ensembl	-	222014008	222001007	noncoding
ASHG19A3A018718	5.81357	5.66799	8.33191	143.59	148.016	154.571	161.561	2.85631	2.82402	3.37066	7.0704	7.19412	7.22758	7.19968	A	A	A	P	P	P	P	chr21		GAAATGATGATCTGTAGTTCGTCTGAGAGAGTTGCAAGATTCTAAACAGAGAGCTTTTTC	2110	AL109791	misc_RNA	-	29329576	29327484	noncoding
ASHG19A3A051098	491.414	501.109	536.523	894.434	476.658	453.216	498.543	8.90299	8.92923	9.05842	9.87756	8.96704	8.85607	8.91881	P	P	P	P	P	P	P	chr1	RP11-458D21.2	AGTCTCTGGATCTGAAGTCATCCACTTTCCCATTCCTAGCTCACCTCACCCATCGTGAAG	666	ENST00000421937	Ensembl	-	145375554	145373053	noncoding
ASHG19A3A043528	208.261	189.435	208.443	276.859	316.395	229.306	342.102	7.75336	7.61755	7.7843	8.07402	8.34054	7.8217	8.3375	P	P	P	P	P	P	P	chr10	RP11-195B3.1	ATATGAGGAACTTAGCAAATGGACTCATTCTTCATTTTCTTCTTCCTCTCTCTCCTGATT	463	ENST00000436340	Ensembl	+	3309207	3308194	noncoding
ASHG19A3A050292	128.007	139.311	133.945	54.0594	58.8799	72.4432	68.1051	7.09054	7.20384	7.18822	5.61122	5.81416	6.10116	5.89847	P	P	P	P	P	P	P	chr13	RP11-474L7.4	CACAGGTGCATGCAGCTTTGCAATATAAGATTAAACTGTACAATGTTCTATAATCTCCAT	557	ENST00000430033	Ensembl	+	74162207	74138380	noncoding
ASHG19A3A041324	117.797	79.6813	106.885	89.4031	110.095	89.5293	128.229	6.9802	6.43766	6.87997	6.37348	6.74669	6.40464	6.84818	P	P	P	P	P	P	P	chr1	RP1-212P9.3	AAGGAGATGGTTAAAAGAGAAAAGCCTTTCTCCGGACCCACCTGCAGCATTAAGAACCAT	1085	ENST00000418471	Ensembl	-	29203848	29196994	noncoding
ASHG19A3A031047	245.283	294.937	242.034	109.878	355.074	324.118	418.181	7.96862	8.20778	7.98211	6.67107	8.50717	8.34652	8.64347	P	P	P	P	P	P	P	chr6	RP1-135L22.1	TGTGCCATGTGATCCTCCCTGCAAAACCACAAATCTCCAGTAAAATCTGTAAAGAAAAAA	387	ENST00000426374	Ensembl	+	21355527	21354641	noncoding
ASHG19A3A047152	900.63	902.491	836.888	339.007	216.797	179.506	208.094	9.71407	9.72407	9.67723	8.38486	7.76986	7.45385	7.58769	P	P	P	P	P	P	P	chr11	AP002856.7	ACTACCTGCAAAAACACTACTTAAGGTGTCGCCCCCTCTTCATGGGAGTAGACATATTCT	569	ENST00000441638	Ensembl	+	131121711	131104432	noncoding
ASHG19A3A032043	69.9089	73.06	78.0859	152.905	60.0986	63.2161	57.9201	6.25975	6.31975	6.44557	7.16446	5.84604	5.89609	5.6577	P	P	P	P	P	P	P	chr6	RP11-527F13.1	AAGATAGAATTTTGGACCTGGATCACCTGTAGCCTGCCTAGCAATGAAGACCTCATCAGT	583	ENST00000444229	Ensembl	+	126523385	126498338	noncoding
ASHG19A3A013598	37.9337	21.8198	35.653	73.1963	42.1681	35.8117	25.5684	5.39382	4.71237	5.36091	6.06554	5.31059	5.04415	4.41211	A	P	P	P	P	P	P	chr2	AK094343	AGCTGTCTGTGTGCCTTGCATTTCAATCAGCAGCCTTACAAATGATGATGAGGAGAAGGA	1892	uc002rvu.1	UCSC_knowngene	-	47572105	47441087	noncoding
ASHG19A3A050753	166.23	92.2657	165.685	293.195	89.9	79.6976	78.1749	7.44912	6.64391	7.47243	8.15766	6.43993	6.23249	6.10579	P	M	P	P	P	P	P	chr1	AL358175.1	AATGCCTTTCATCTGTGATCTCACATACCAGCCTGTCCTTTCCATTGAGAGGAAAGCTGA	2504	ENST00000437515	Ensembl	-	121139765	121102016	noncoding
ASHG19A3A031191	82.493	67.8992	83.1081	72.3286	54.4807	26.1306	19.7313	6.4939	6.22017	6.53635	6.04716	5.69638	4.56938	4.00284	P	P	P	P	P	P	P	chr6	HCG16	TTTAAATGATTCGAATCTTGAGGTTTCAAACTGAACCGTCTTGTGCCTTTTGCCCGGCGG	317	ENST00000445544	Ensembl	+	28956313	28954576	noncoding
ASHG19A3A020069	213.017	170.612	224.699	330.893	224.336	155.334	174.014	7.78041	7.47691	7.87986	8.34732	7.82089	7.23524	7.30876	P	P	P	P	P	P	P	chr22	DGCR5	GCATGGGATTAAGCAAATGTTTCCTAATCATGTTTGTCCCTGTGCTCTGGCTTCTTGACC	5427	NR_002733	RefSeq_NR	+	18982141	18958026	noncoding
ASHG19A3A052539	149.676	111.144	148.705	105.865	197.386	126.68	218.633	7.30004	6.89647	7.32941	6.61829	7.62734	6.92739	7.65801	P	P	P	P	P	P	P	chr1	RP11-431K24.4	TCTACCTGAAAACAAAACAGGCACAGAGCACCTCCTGCTTGCTTGTGTGGTCGCAGGGCC	477	ENST00000424689	Ensembl	-	8280589	8278249	noncoding
ASHG19A3A045244	53.6973	38.8589	55.1692	42.5955	67.1084	40.7879	69.7689	5.88393	5.47285	5.96418	5.24833	6.01256	5.23647	5.93414	P	P	P	P	P	P	P	chr1	RP1-18D14.3	TTGAGGCATCAGCACAATGGACCTGGCCACACCAGTTTATTCCACACCGCTGAGGCTGGT	363	ENST00000444042	Ensembl	-	47644943	47643840	noncoding
ASHG19A3A000125	273.163	260.198	233.337	532.893	580.943	561.917	604.968	8.10786	8.04408	7.92845	9.0861	9.2635	9.18383	9.20987	P	P	P	P	P	P	P	chr2	AC092580.4	CAACTACAGTCATTTGTTCTCAGAGGTCTGGACCAAAGAGAAACAAGAAAAGCTGGAGTC	243	ENST00000417930	Ensembl	+	7870836	7865931	noncoding
ASHG19A3A031899	24.489	19.4039	12.2609	481.804	469.926	484.572	572.941	4.78353	4.56906	3.8897	8.92774	8.94428	8.9602	9.13599	A	P	A	P	P	P	P	chr6	RP1-60O19.2	TACTGACGAATTTCACGGACAAAATACTAAGAAGGAAATCAAGTGAATCAAGCGGAGAAG	419	ENST00000424162	Ensembl	+	107147869	107143409	noncoding
ASHG19A3A030705	7.97978	16.1685	13.2627	16.5537	16.6609	33.7704	36.9508	3.20544	4.33983	3.99442	3.80748	3.90995	4.95249	4.97906	A	A	A	P	P	P	P	chr6	BC031960	CTATAGCTGTATTGCTCAATCCTTTCCTGGGATCTGGGAGAAAATAAATTTCATTTTTGG	883	uc003qod.2	UCSC_knowngene	-	151549592	151517809	noncoding
ASHG19A3A028161	44.2206	59.585	52.7741	46.9726	56.6081	73.4365	72.5195	5.6109	6.04121	5.90224	5.39847	5.7539	6.12006	5.98943	P	P	P	P	P	P	P	chr5	LOC153684	TAGGACTAAGAAACTTGAGGCTAGGCTGACCCCATGGTTGTTATGATTAGAAATCCGAGG	1222	uc003jng.2	UCSC_knowngene	+	43045370	43041676	noncoding
ASHG19A3A037573	22.2204	13.8183	13.4319	50.2706	38.7476	45.3816	53.876	4.63734	4.15232	4.01406	5.50484	5.18437	5.39983	5.54856	A	P	A	P	P	P	P	chr9	RP11-151D14.1	AAGAGAAATAAGAGTGACCATATGTTCCTTAAGAGAAGCAAAGAGCAGCTCCTGTTCCTG	583	ENST00000453787	Ensembl	-	75489025	75486643	noncoding
ASHG19A3A017470	38.5285	16.4748	21.2458	94.8671	11.231	53.0573	22.2444	5.41571	4.36596	4.64783	6.45933	3.26791	5.63489	4.19477	A	P	P	P	A	P	P	chr20	RP4-737E23.4	AGTTCATTCTGAATTGTAAGGTAACCACTGCAGAACACGAGCCTTTCCTGGGTATGTGTG	1896	ENST00000443744	Ensembl	-	23113258	23105704	noncoding
ASHG19A3A054960	62.6015	58.6495	61.9512	85.6099	28.4482	95.0233	47.975	6.09562	6.0204	6.12593	6.30609	4.72272	6.4949	5.3722	P	P	P	P	P	P	P	chr17	AC108004.2	ATAGAAGAAAGACTCACATTTCTTTGCACCATTGAGCCCATCACTGCAGCACCAGAGCAT	787	ENST00000477499	Ensembl	-	37038	33614	noncoding
ASHG19A3A013745	13.2611	11.572	10.0971	28.582	27.2072	21.6866	23.5921	3.90604	3.94386	3.63023	4.65268	4.65184	4.28661	4.28796	A	A	A	P	P	P	P	chr2	AK097952	AAAGGTTATGGCAAACTGTGTCTGCAGCCCACAGTAAAATCCAGTTTAAGGCTCTCCACA	1977	uc002sdf.1	UCSC_knowngene	-	65090760	65073263	noncoding
ASHG19A3A045884	161.542	141.097	179.358	221.942	108.177	92.4774	109.093	7.41186	7.22224	7.58673	7.73118	6.71919	6.45392	6.60538	P	P	P	P	P	P	P	chr1	RP11-117D22.1	CGCCAGCATTTACTTCATACCTCCCTTTAATCAACTCACTTTTCTCTAAAAGCTTTAAAA	383	ENST00000429099	Ensembl	-	53814905	53814159	noncoding
ASHG19A3A050111	158.607	133.383	155.199	568.798	229.096	195.735	874.696	7.37919	7.14378	7.38687	9.18318	7.85453	7.58277	9.77855	P	P	P	P	P	P	P	chr13	RP11-460G11.1	TAAACCATCTGTCTTCCCTTCCTGGGGAGTAGCAGGTTATGAATAAATTATGCTGCCAGA	547	ENST00000425609	Ensembl	+	43733602	43732766	noncoding
ASHG19A3A037830	30.8101	36.8355	34.304	30.3367	42.4182	35.5949	59.9526	5.10409	5.4018	5.30702	4.7406	5.31842	5.03463	5.70606	P	P	P	P	P	P	P	chr9	BC035187	ATTGCAGCTATACCCTTTAGACAGGAAACACACTTTCCAGTTCTCCTTGACAGAGAGGCT	3729	uc004bbt.2	UCSC_knowngene	-	106087312	105902809	noncoding
ASHG19A3A012431	69.397	61.3724	72.0028	603.378	599.998	606.958	652.493	6.24812	6.08138	6.33117	9.27008	9.31303	9.29918	9.32842	P	P	P	P	P	P	P	chr1	RP11-17H4.2	GCCTGAGTTAAATAAGCATCTGCATGCAGAAATAAATAAGTGAGGGAATTTGTACTTTTC	597	ENST00000448058	Ensembl	-	231747836	231727037	noncoding
ASHG19A3A015597	310.732	339.34	306.18	625.024	244.995	219.654	262.538	8.29199	8.40614	8.31199	9.3225	7.96115	7.75751	7.94068	P	P	P	P	P	P	P	chr2	AC012354.6	TTCATCCCTGCTCATTAGTCTCCTCCTCGGTTGTTTGGTTGAATGTTTCCTAATGCCAAG	2681	ENST00000425325	Ensembl	+	45195897	45181802	noncoding
ASHG19A3A000366	23.101	33.5117	18.8248	39.9421	10.7392	7.9443	11.4388	4.69988	5.27464	4.48361	5.15255	3.207	2.75902	3.12626	P	P	P	A	A	A	P	chr1	RP13-614K11.1	GATGCTGGGAAAAATGCACATAAAAGGGTCCTGTCTTTGTGATGTCAGCGTGAAGTGGAA	561	ENST00000456897	Ensembl	+	4009411	4000672	noncoding
ASHG19A3A036799	36.3756	22.2627	64.2458	115	88.6366	112.241	100.93	5.33868	4.73861	6.17272	6.73383	6.41944	6.73837	6.48165	A	P	P	P	P	P	P	chr1	RP11-108M21.1	AATCAGGAAGTATATCTAAGTCACCTCCAGTAGCCGTAACTCTACCTTGTCCAGTAAAAG	858	ENST00000458683	Ensembl	+	187329455	187061973	noncoding
ASHG19A3A015875	68.925	51.0915	69.845	66.7145	86.4123	74.3169	100.317	6.23807	5.83933	6.2888	5.92448	6.3828	6.13581	6.47128	P	P	P	P	P	P	P	chr2	AC073628.1	AGTATGTGGTGGTATCCACTTACTGTCTACTGCCTCCATAACTCCTAAAGTCTTCTGAAG	635	ENST00000443419	Ensembl	+	78145135	78143059	noncoding
ASHG19A3A029463	24.9247	26.7367	20.7538	109.533	101.126	93.5797	119.081	4.80949	4.97804	4.61841	6.66638	6.61692	6.47265	6.74169	P	P	P	P	P	P	P	chr6	AK092541	ATCTTCCACCAGACTTACAGGTGTTCCACCTGCTTGTAGTTTCGGTAATAATACCAGCTG	1930	uc003ncv.1	UCSC_knowngene	-	19804981	19802394	noncoding
ASHG19A3A038537	1869.14	1868.97	1839.67	1748.83	1807.53	1779.62	1822.07	10.7219	10.7312	10.765	10.8674	10.9486	10.8992	10.8664	P	P	P	P	P	P	P	chr9	RP11-112J3.16	TCACAGGTACAGCTTGTGCTAGGCAGCCGGTGTTCAATAAATATCGTGCCTAAGGATAAA	407	ENST00000431981	Ensembl	+	35790429	35786642	noncoding
ASHG19A3A007229	376.905	321.3	366.649	225.249	444.367	344.746	520.226	8.55834	8.33034	8.56284	7.75504	8.85575	8.4311	8.98087	P	P	P	P	P	P	P	chr21	C21orf131	tgctgctgtgtccttcccctattggctaaggcttctgacagctttggagattgtgacatt	2014	NR_024090	RefSeq_NR	-	22175426	22114913	noncoding
ASHG19A3A014866	124.75	90.7232	90.9282	67.7409	115.319	124.471	123.855	7.05694	6.61852	6.65431	5.94725	6.81699	6.89984	6.79716	P	P	P	P	P	P	P	chr1	RP1-37J18.2	AAACCAGAGTAAAAGCAACCAAAACAGAGTCCAAGTCAGGGTCCTTCCATCCTCAAACCA	682	ENST00000420522	Ensembl	+	4643481	4631607	noncoding
ASHG19A3A043461	280.567	238.106	230.049	278.616	212.382	261.843	250.602	8.14483	7.92766	7.9107	8.0825	7.73743	8.02373	7.87242	P	P	P	P	P	M	M	chr10	RP11-432J24.3	CCCTCCCTGGGAGAAGCTGCAGCTCTGAGGCTACGGTCTTGCAGGTCAGCCACCACCTGG	1013	ENST00000450206	Ensembl	-	134254988	134247236	noncoding
ASHG19A3A031707	105.846	118.124	109.275	185.612	78.9846	51.2516	69.4255	6.83326	6.9767	6.91084	7.46393	6.2517	5.57857	5.92856	P	P	P	P	P	P	P	chr6	RP1-288M22.2	TCCCTTGTCTTCATGGCCCAGTTTCTCTGACACCGTGTTTATTCTTATGATGACCATGGT	454	ENST00000431997	Ensembl	+	72168577	72160536	noncoding
ASHG19A3A032300	275.861	272.94	255.494	639.508	295.779	276.951	291.347	8.12058	8.10731	8.05529	9.35843	8.24052	8.11395	8.10181	P	P	P	P	P	P	P	chr6	RP11-235G24.3	TTGGCCTCCTGGCTCATCATCCTGCCGGAAGCATCTCCAGCTTGGGGATGTTGGAGGGTC	379	ENST00000420601	Ensembl	+	161348194	161347400	noncoding
ASHG19A3A050033	166.747	161.906	167.436	373.563	255.118	221.368	238.831	7.45342	7.40624	7.4868	8.53105	8.02983	7.77119	7.79844	P	P	P	P	P	P	P	chr13	RP11-37E23.5	TCAATAGCTTACACGTGCTTCCTGATGCCTGCCTTAACAACAAAAAATTCGTGTCCATAG	437	ENST00000418076	Ensembl	+	32872849	32872290	noncoding
ASHG19A3A032105	24.661	16.1261	17.6745	14.8096	10.66	13.7749	11.6202	4.79232	4.33635	4.39285	3.63104	3.19549	3.56206	3.14903	A	P	P	A	A	P	P	chr6	RP1-32B1.4	TACATGATAGAGTGGAAGCCACAAAGGAAGAAGAAGAAGAGATTCTATCTGGGTATGGAG	216	ENST00000434255	Ensembl	+	135582071	135581133	noncoding
ASHG19A3A050072	31.7979	24.1706	26.0595	31.9083	46.5069	34.7532	56.5156	5.14903	4.84511	4.93274	4.8196	5.45836	4.99651	5.62078	A	P	P	P	P	P	P	chr13	RP11-571G1.2	CCAAAGCTCTCATCTGTTCTGTATTCTGTTATTTAATATCCACAAGGCTTCATTGCTAAA	435	ENST00000441430	Ensembl	+	39153131	39150776	noncoding
ASHG19A3A037384	56.8743	46.8383	55.9466	34.8964	55.2638	57.8849	65.266	5.96483	5.72215	5.98392	4.95159	5.71861	5.75861	5.83454	P	P	P	P	P	P	P	chr1	RP11-16L9.4	AGTGAACAAGTATTTGTGACTCTCCTTCCAAATGAAATGTTCTACAGAAAGGTGGAAGTG	662	ENST00000432488	Ensembl	+	199045864	198985261	noncoding
ASHG19A3A031390	2140.18	2229.75	2064.44	956.939	1028.4	977.603	1120.01	10.918	10.9833	10.9238	9.98263	10.1249	10.0216	10.1518	P	P	P	P	P	P	P	chr6	RP1-187N21.2	ATAACTGCTCTTTGGCTCTGTGTGTGAAGATTGGGGGAGAGGATGTAAACTAAGAGTATA	2279	ENST00000419956	Ensembl	+	34254545	34252266	noncoding
ASHG19A3A013666	21.1134	21.5182	24.0705	95.4337	26.8296	21.5224	34.6155	4.56402	4.69668	4.81523	6.46766	4.62838	4.27506	4.87901	A	P	P	P	P	P	P	chr2	DM004471	ATACAATCCCTCACAGTGGTCTCTGGGATTATGCTAAACAGAGCAATTTCCTAGCCCTCA	110	uc010ype.1	UCSC_knowngene	-	56216194	56216084	noncoding
ASHG19A3A039412	174.125	165.224	167.932	15.0228	20.0866	26.6707	21.0342	7.50974	7.43368	7.49198	3.65429	4.20191	4.60072	4.10407	P	P	P	P	P	P	P	chr1	RP11-288L9.1	ACAGACGGACGGATAAATGGCTGGAAGAGGAGTGATTGAAAAAATACATTTTAAAATGCC	441	ENST00000440492	Ensembl	-	27989233	27986838	noncoding
ASHG19A3A029459	376.588	387.454	393.639	474.329	464.334	413.415	523.925	8.55714	8.58743	8.65757	8.90351	8.92705	8.71215	8.99475	P	P	P	P	P	P	P	chr6	RP11-686D16.1	ATTGCAAAGGTTTCCCCCGCTGATTCTGCCAACAGAAATGTTTTTATTGTGCTGCTTTGG	381	ENST00000443504	Ensembl	-	19321252	19290549	noncoding
ASHG19A3A028162	12.1429	7.76724	11.7263	24.8431	25.452	32.3653	37.5806	3.77908	3.50522	3.83576	4.43486	4.54797	4.8915	5.00385	A	A	A	P	P	P	P	chr5	LOC153684	TAGCAAATGTCTGTGCAGTTGCAAAAGATAATTTTTGGCCGTGAGAAGGTTGCCGCCAGA	2261	NR_015447	RefSeq_NR	+	43045370	43042235	noncoding
ASHG19A3A031134	68.3428	78.518	61.2305	73.7998	93.8103	97.4527	107.096	6.22483	6.41907	6.11097	6.08066	6.50928	6.53229	6.57842	P	P	P	P	P	P	P	chr6	C6orf41	GAGGCCAGAAGTCAGAAAACAAGGTGTCTGCAGGACCAACCTCTCCTCTGGATGCTCTAG	983	NR_026775	RefSeq_NR	+	26991752	26924771	noncoding
ASHG19A3A033220	53.605	55.855	53.0176	516.979	473.656	495.394	524.467	5.88168	5.95659	5.90828	9.04164	8.95532	8.99475	8.99675	P	P	P	P	P	P	P	chr1	RP11-48O20.4	AAGATGAACAACATGACCGGGAAGATTTCCTAATCTCACCACAGCCTGGCTCTACCTTAA	1113	ENST00000423943	Ensembl	+	159948851	159931013	noncoding
ASHG19A3A047888	49.7108	48.6975	47.5379	85.5687	34.7507	27.3595	41.3772	5.77587	5.77187	5.7599	6.30562	5.02009	4.63701	5.15229	P	P	P	P	P	P	P	chr1	RP5-1027O11.1	AGAATCTATTGCCCTCTTTACTTCACAGTGCTACAGAGAGGATTACATGAGCCAATATTT	787	ENST00000437598	Ensembl	-	88371397	88365591	noncoding
ASHG19A3A055220	178.707	144.895	194.594	228.598	317.63	213.578	356.954	7.54377	7.2566	7.6958	7.77905	8.34616	7.7139	8.3999	P	P	P	P	P	P	P	chr6	AK094433	CTTTGTTGGATTGGGCTTCATTGTGAAAGAGTGTTTCCTGCCTCCATTAAATCCATCCAC	1980	uc003nsj.1	UCSC_knowngene	+	31027653	31021983	noncoding
ASHG19A3A038890	80.2178	82.6415	86.534	103.57	106.974	124.294	108.917	6.45755	6.48761	6.59267	6.5848	6.70225	6.89783	6.60199	P	P	P	P	P	P	P	chr9	XXyac-YM21GA2.4	TCCATGGAAAGACCTGGAGAGATTGGCTCACTGCTGAGGAGGCTGCTGCTCTTCCCTTAG	452	ENST00000447524	Ensembl	+	90481205	90479080	noncoding
ASHG19A3A030837	19.3622	14.8066	20.2025	16.2852	24.5843	26.8537	30.7629	4.44391	4.23451	4.58352	3.7801	4.49819	4.61181	4.69622	A	P	P	P	P	P	P	chr6	RP11-503C24.2	AAATGGTTTGCTGTGACCAGAGAAGAAGAAGGAAACACGTTGAAGTCCTTGTCCTGGAAG	455	ENST00000424343	Ensembl	-	168627197	168625958	noncoding
ASHG19A3A000270	30.3075	27.2344	30.1439	79.6086	51.8128	44.555	44.0894	5.0814	5.00135	5.13443	6.19814	5.61777	5.37379	5.24686	A	P	P	P	P	P	P	chr19	AC002511.1	GAAAACCCACCCATCTACCTGCAGGAAAAGagacagggtttcactatgttggccaggatg	474	ENST00000441942	Ensembl	+	35900395	35897486	noncoding
ASHG19A3A016157	24.6989	14.8773	15.891	27.4565	25.0724	21.186	16.0353	4.79421	4.23891	4.25382	4.592	4.52622	4.24885	3.67285	A	P	A	A	P	P	P	chr1	RP13-221M14.2	TTAGCCAAGAGCCTCAGCTTCCTGTAAAATGAGGATGATGATGTCCAACAGCTTATGGGA	384	ENST00000437631	Ensembl	+	13147256	13146776	noncoding
ASHG19A3A039138	176.418	98.6019	199.803	105.721	328.298	137.445	345.841	7.52806	6.73468	7.7301	6.61577	8.39767	7.04597	8.35481	P	P	P	P	P	P	P	chr9	RP11-18B16.2	TATAAAACCTGATGGGAGGGGAGGTTGCAGTAAAAGCCTTGGAGATGAAAACACTGGACA	1223	ENST00000428292	Ensembl	+	116445135	116413235	noncoding
ASHG19A3A055331	21.2691	25.1261	24.187	39.8356	57.0911	47.3187	71.0854	4.57341	4.89381	4.82241	5.14876	5.76939	5.46325	5.95955	A	P	P	P	P	P	P	chr9	CR615666	TCACTTTTATTTGTGAAGAACTGCTTTGGCAGCCGTACCCTCAAGAACTGCACCTTCCAA	891	uc011lre.1	UCSC_knowngene	-	67627731	67579806	noncoding
ASHG19A3A015363	22.3855	26.7365	26.6598	60.2641	13.596	43.8955	34.6674	4.6495	4.97795	4.96441	5.77286	3.57542	5.34869	4.88193	A	P	P	P	A	P	P	chr2	AC019055.1	AACATATCTCAAGGAGCTCATGAAGTCATCCTCATGCACACAGTTTCCCAGGTGTCAGAT	443	ENST00000432822	Ensembl	+	19917337	19911475	noncoding
ASHG19A3A017661	20.2208	22.1941	30.8756	76.2206	40.5489	65.5204	42.6456	4.50537	4.73504	5.16656	6.12929	5.25056	5.95093	5.19767	A	A	M	P	P	P	P	chr20	LOC339568	ATTCCACCAACCACCAGACAGCTCTCTACAACAAAGAGTTAATTGGCAGCTGTGAGACTT	1624	NR_027124	RefSeq_NR	-	37853391	37842423	noncoding
ASHG19A3A029875	77.858	54.9382	78.689	144.017	89.1741	99.9497	147.409	6.41623	5.93198	6.45683	7.07485	6.42807	6.57006	7.06711	P	P	P	P	P	P	P	chr6	RP11-552E20.4	TGTCACATCAGGGAACCCGACTCCAGAACCCTCTGTAAATATCCCATGGCTTGGCCCTGC	824	ENST00000447315	Ensembl	-	40337213	40326482	noncoding
ASHG19A3A053898	26.3684	16.3171	22.5838	63.6047	34.4574	34.2904	46.4529	4.89129	4.35295	4.72978	5.85436	5.00685	4.97728	5.32338	A	P	P	P	P	P	P	chr1	RP3-510D11.1	ATCCGCCCTTTCGTTTTGCGCAGGTGGAGATCTCGCGGGCCCAGTTCGGAGTCCTGCAAA	548	ENST00000437157	Ensembl	-	9262678	9228326	noncoding
ASHG19A3A038145	2157.95	2078.39	2171.48	2622.78	2630.05	2565.33	2739	10.9299	10.8942	10.9943	11.4622	11.5016	11.4382	11.4613	P	P	P	P	P	P	P	chr1	RP11-480I12.3	TATTTTGTGTAGTCCTACAACGTCTTGTTACTACCCCCTATTACAACACTTATAACTCAG	748	ENST00000417262	Ensembl	+	202781041	202780089	noncoding
ASHG19A3A034933	22.8389	17.3137	22.6678	15.0066	8.62394	16.3628	9.65977	4.68159	4.42797	4.73359	3.65245	2.91109	3.84511	2.88937	A	P	P	A	A	P	P	chr7	BC022431	GCCTATTGTTGAAGGTCGGCTCTTTAATGTGCAAATTAAGGTGTTTTATTTCCTTCATAT	1187	uc003vhh.1	UCSC_knowngene	+	114766368	114719011	noncoding
ASHG19A3A014132	643.94	663.173	620.256	1090.08	547.208	817.189	666.383	9.26932	9.30399	9.26279	10.1716	9.1751	9.74585	9.36105	P	P	P	P	P	P	P	chr2	AC068057.2	ACATGTTATATTGTGGCCCATGCCCTCCTCCTGAGTTCTTCAGTTTTAATCATTTCATTT	482	ENST00000421071	Ensembl	-	105371333	105365841	noncoding
ASHG19A3A018063	15.784	19.8666	18.811	43.7597	39.4331	26.8103	45.5314	4.14413	4.59788	4.48314	5.29297	5.2092	4.60799	5.2929	A	A	P	P	P	P	P	chr20	RP11-157E14.1	TCAAAGGGTAAAACATTGGCTCACTCCTAATGCAATAAATGACACATAAGGTCACAATTC	601	ENST00000432244	Ensembl	+	12932275	12930985	noncoding
ASHG19A3A014624	41.8838	36.7954	34.1474	48.2865	59.1617	48.6562	73.6753	5.53195	5.40046	5.29953	5.43652	5.82264	5.50391	6.01581	P	P	P	P	P	P	P	chr1	RP4-740C4.4	AGCAGGTGGCTTTTCTTGAGCGCCAACATTCTGCCCGTGGGTGAGTGAGGCCCTGGCTAC	371	ENST00000420406	Ensembl	+	2362089	2357418	noncoding
ASHG19A3A009877	122.206	148.708	130.903	123.277	66.9824	79.4406	135.308	7.02913	7.28881	7.15729	6.84632	6.0092	6.22798	6.93287	P	P	P	P	P	P	P	chr17	AC118653.2	AAGCAAAGGGCTTGGTGGAGAGCAGAGAGCAAATAGATAATATAAGAATCTCACCCCCAA	561	ENST00000442627	Ensembl	+	69593419	69592478	noncoding
ASHG19A3A037678	63.8345	54.5994	56.632	34.3316	36.7769	38.4409	37.3805	6.12338	5.92353	6.00196	4.92562	5.10443	5.15106	4.99606	P	P	P	P	P	P	P	chr9	RP11-389K14.3	TGGCAGGGGGTGGGTATAACCTATGTCAGTGTTTTTCAATGTGAGCAAATTTTAATAAAC	1013	ENST00000425666	Ensembl	-	93195771	93063183	noncoding
ASHG19A3A055332	368.821	310.853	347.146	768.851	991.775	609.497	1123.81	8.52822	8.28182	8.48617	9.6418	10.0725	9.30422	10.1574	P	P	P	P	P	P	P	chr9	RP11-38P6.1	ATTGACCTCCAGCTCCCAGTTTCAGAGAGTTCTCCCAGTCTCCTGGATCACACTGGTCGG	792	ENST00000441326	Ensembl	-	67583159	67579806	noncoding
ASHG19A3A012296	81.4097	69.3539	83.7383	102.106	139.731	106.908	153.109	6.47549	6.24958	6.54782	6.56404	7.10824	6.6713	7.12344	P	P	P	P	P	P	P	chr1		TTCTTGGTGGATCTTGCCTCTGCAGCCTCCAGTGGATGGAGCGATGTGTGAGTGTGAGCA	205	G65685	misc_RNA	-	230142829	230142624	noncoding
ASHG19A3A013896	58.2795	93.5916	50.529	67.0293	35.9564	68.645	52.4514	5.99881	6.66403	5.84369	5.93169	5.07151	6.01742	5.50853	P	P	P	P	P	P	P	chr2	AC084149.2	CATTTCTGATGGCTTTTATCCATCCTGCCCAAATAAAATAAACAAATTACCCTGCTACTT	284	ENST00000437233	Ensembl	-	77881794	77879538	noncoding
ASHG19A3A031012	30.0643	48.1188	38.6998	57.8388	19.3419	26.1803	146.907	5.07259	5.75847	5.47794	5.70846	4.1465	4.5723	7.06206	P	P	P	P	P	P	P	chr6	RP3-448I9.1	AACAGAGCTTGGAAGACCGACAAGTGAACAGTTGATAGTGTCCTGTTCTCCTGTTGTGTA	405	ENST00000434947	Ensembl	+	14404520	14394556	noncoding
ASHG19A3A017223	12.4927	7.69873	22.8785	14.3382	23.8406	13.3223	27.3986	3.82125	3.49545	4.74564	3.57747	4.4496	3.50631	4.51599	A	A	P	P	P	A	P	chr2	AC114730.2	AATTTGGCATTGTTTGATGCTCAGACTGCTGCCGTGTCATTTTCACACGACAGCAAGTTG	571	ENST00000442867	Ensembl	+	242787188	242786531	noncoding
ASHG19A3A017452	330.378	299.872	335	707.914	850.048	572.126	891.185	8.37866	8.23186	8.43656	9.50923	9.83747	9.21349	9.80949	P	P	P	P	P	P	P	chr20	CR627206	TAAGTTGTGTAGTGAGTTCTTGTTGTGTGTTCAATGCTTCACCTCCACCTCCTCATCGGT	4392	uc002wsk.1	UCSC_knowngene	-	22263124	22255045	noncoding
ASHG19A3A018170	5	5.18403	5	47.5525	50.116	55.6941	53.4499	2.37766	2.32938	2.39437	5.41594	5.5697	5.70445	5.53772	A	A	A	P	P	P	P	chr1	RP11-70P17.1	AAGTGTTCCAAGACAGCAGTGTCAGCAAAGGCTGCGCAGATTTGAGGAGTGGGACCGGCA	483	ENST00000412797	Ensembl	+	25916847	25907968	noncoding
ASHG19A3A009654	22.5453	24.9345	21.2687	19.3117	24.3705	44.4659	40.1048	4.66081	4.88487	4.64931	4.04938	4.48405	5.36906	5.10218	A	P	P	P	P	P	P	chr17	RP11-357H14.4	CCAAATTCTCTACTAGGCCTCCGAACCAAAACGAAGGAAAATCCGTTTTCTTCTTGGGCT	566	ENST00000480386	Ensembl	+	46712294	46706036	noncoding
ASHG19A3A041998	32.6721	39.5567	30.5265	23.1807	34.9241	33.7223	39.5974	5.18565	5.49482	5.15069	4.32988	5.02847	4.9514	5.08101	P	P	P	P	P	P	P	chr1	RP4-781K5.7	CGCATAATGCAAACAATTCAGGTTTCACCCTTTGCAGTGAACTTTGTACAGCTCTCCCAG	1008	ENST00000422414	Ensembl	+	234855723	234845134	noncoding
ASHG19A3A037264	79.1343	62.3287	64.7673	110.846	87.0891	112.052	104.362	6.44044	6.1043	6.1838	6.6838	6.393	6.73581	6.53619	P	P	P	P	P	M	P	chr9	RP11-384P7.6	CCCACCATTGGCCTTATTTACTGGAATGTTTTTATAACCTTTATTTGACACCTCTTCCCA	486	ENST00000444956	Ensembl	-	33738414	33732972	noncoding
ASHG19A3A037951	297.743	216.497	283.059	331.344	625.59	413.069	708.876	8.23165	7.7996	8.20218	8.34935	9.38196	8.71142	9.45997	P	P	P	P	P	P	P	chr9	RP11-402G3.5	AAGACGTCTGAGCCATCCCTGTGCCACCACCAAGAGTCACTCCAGCTTCTGAAAAAGCCA	404	ENST00000415101	Ensembl	-	117424654	117418583	noncoding
ASHG19A3A015365	44.9228	45.5485	39.567	427.825	414.022	392.612	405.671	5.63296	5.68451	5.50569	8.73748	8.74072	8.62965	8.59713	P	P	P	P	P	P	P	chr2	AC013400.2	TGAAGAGTGAAAGCATGTTGAACACCAAGATGCTCTCCAAAGATGGAGTCCTTCTCTTCT	2239	ENST00000438692	Ensembl	+	20077154	20068620	noncoding
ASHG19A3A015325	664.641	680.602	662.836	649.081	909.469	975.709	1044.4	9.31009	9.33892	9.35379	9.37936	9.94107	10.0195	10.0473	P	P	P	P	P	P	P	chr2	AC099344.4	GAACCTTCTCAGCTTATTCAGAGAGGCTTCTTCTTCCTATTTAGTCTCCCTCTGGCTTTC	499	ENST00000417473	Ensembl	+	11542372	11534106	noncoding
ASHG19A3A020538	50.566	30.5193	45.6778	53.1709	24.3136	50.5545	31.6813	5.7992	5.14855	5.70758	5.58722	4.4807	5.55902	4.74398	A	P	P	P	P	M	M	chr22	RP4-754E20__A.5	ATTTTACAAATTTAGCCACTGTCACCGGAGGCCTGGCTGAACTTCAGAGTTTCTTCTCCA	951	ENST00000450750	Ensembl	+	43805687	43796336	noncoding
ASHG19A3A014169	84.5517	130.373	79.5021	152.446	59.4271	51.5222	117.923	6.52521	7.11435	6.47375	7.16002	5.83004	5.58676	6.72474	P	P	P	P	P	P	P	chr2	AC019100.3	TACTAGAATGTTCTCTGCCATCCACTAAGCATTGAATCCCTCCAGACACTGTTACAACAG	611	ENST00000445083	Ensembl	-	108834297	108784203	noncoding
ASHG19A3A029594	18.1881	7.9281	23.9243	41.4169	31.638	24.6685	34.9294	4.35064	3.52424	4.80636	5.20665	4.87888	4.48391	4.89264	A	P	P	P	P	P	P	chr6	C6orf38	ATTGAAGCTTGAAGAACCAAAATGAGGAAGGCAGAATTAGGAAAGACCCTGTCCGGTGAC	537	ENST00000456103	Ensembl	-	28616843	28616062	noncoding
ASHG19A3A017909	72.7543	61.337	68.577	89.2334	115.15	91.616	135.481	6.31801	6.08036	6.26316	6.37102	6.81371	6.43982	6.93563	P	P	P	P	P	P	P	chr20	RP5-963E22.4	AGAAGAGCAGAGAGATGAAGGCCTCCATGCCACAGCCCAGGCCGTGCACATTTGTGTTGA	542	ENST00000423020	Ensembl	-	61812255	61798148	noncoding
ASHG19A3A044647	339.657	385.796	378.914	298.208	612.789	646.951	668.748	8.41504	8.58104	8.61056	8.18558	9.34781	9.39437	9.36746	P	P	P	P	P	P	P	chr10	AK124226	TGTCCTCATGTTAACCCCCTTATGCTGTCTCCTCCAATAATGCATGTGGTTTGGTCTCTA	3086	uc001lkg.1	UCSC_knowngene	+	130115990	129979399	noncoding
ASHG19A3A039705	10.2447	5.11005	8.23362	20.8258	19.473	13.8401	24.2293	3.55811	2.32641	3.35648	4.16419	4.15544	3.56847	4.33114	A	A	A	P	P	P	P	chrX	RP11-149B9.2	CAAAAGAGTTCGCTGCTGGTTTCTGAGATGAATTTGTGATGAAGAAAGAGGGTCAAAGTA	756	ENST00000456037	Ensembl	-	28604512	28589648	noncoding
ASHG19A3A014252	54.6274	31.647	39.6135	43.5236	76.4263	51.5263	83.7827	5.90982	5.19803	5.50833	5.28308	6.20261	5.58708	6.20911	P	P	P	P	P	P	P	chr2	AC009312.1	CCAACACCACTGCCTACAAGATGAACTGCTTCCAAATGATGATAGAGGAAAAACTTTCAG	592	ENST00000457110	Ensembl	-	118561750	118515138	noncoding
ASHG19A3A013253	275.497	318.714	301.987	531.508	304.22	184.235	367.183	8.11864	8.3213	8.2911	9.08236	8.28206	7.49054	8.4457	P	P	P	P	P	P	P	chr2	AC092580.3	TTGTTCTTTTTCTACCCATAAGGGAATGATTCAAAATGTCCCTCCACCTGGGTCCAACCG	469	ENST00000414654	Ensembl	-	7812377	7811734	noncoding
ASHG19A3A050342	45.8359	41.7161	40.5138	95.2127	68.9094	61.8504	52.1089	5.66254	5.56593	5.54061	6.4645	6.05115	5.85786	5.49803	P	P	P	P	P	P	P	chr13	RP11-276G3.1	ATCCTCAGGCCTCTGCCTTGTAGGAAGATCCTTTCTTTTAATAAATTACAGAGCTGAGAA	428	ENST00000457858	Ensembl	+	80379820	80378552	noncoding
ASHG19A3A017424	17.6314	21.5228	18.2735	42.7356	34.8702	33.5518	32.129	4.30318	4.69707	4.43859	5.25294	5.02587	4.94243	4.76582	A	P	P	P	P	P	P	chr20		CAAGAAAAAGAATATGGGGGCCCAGAGTGCTTGTGTCTGGAGCAGGTCACAGAATTAAAT	1665	BC004382	NRED	-	19738681	19737034	noncoding
ASHG19A3A039433	25.8445	21.2922	16.3436	8.178	34.4058	35.0674	40.7481	4.86348	4.6846	4.2892	2.75456	5.004	5.01029	5.12925	A	P	A	P	P	P	A	chr9	RP11-98L5.5	TCCATCCGGACCAGGGACGGCGGGGACGTGGACTTCGTGCTGTTCTGGAAGTAAGCACGG	202	ENST00000430816	Ensembl	+	138507354	138506141	noncoding
ASHG19A3A015244	13.3517	17.7115	90.1945	14.6618	13.4142	23.5775	22.5665	3.91662	4.45573	6.64448	3.61241	3.55193	4.41595	4.21716	A	A	P	M	A	M	M	chr2	AC105393.2	CACAGCTTCAGATATTGTTATTGCTTCTATCCATTCTGCTAAACTGAGCCATGGTTAATA	598	ENST00000449621	Ensembl	+	422303	421132	noncoding
ASHG19A3A013749	159.101	127.544	161.143	220.303	311.459	223.697	345.829	7.38415	7.08366	7.43461	7.71921	8.31371	7.78599	8.35473	P	P	P	P	P	P	P	chr2	AC007386.4	ATCCAGTTCTCCAAGGTGTTCATTTTGACATCCAGCCTGACACTTCCTTCGCACTTTTGT	1018	ENST00000430134	Ensembl	-	65280151	65257880	noncoding
ASHG19A3A038657	28.001	22.7547	28.283	44.0239	51.0091	42.2881	53.8366	4.97006	4.76615	5.04503	5.30252	5.59147	5.29383	5.54737	A	P	P	P	P	P	P	chr9	RP11-374M1.2	TGTGACAGAGGCTCCTAGAATCCTGTCTCAAGTGGCCGCCTTCACAGAGGGAGTCACTGA	747	ENST00000439760	Ensembl	+	45112467	45108580	noncoding
ASHG19A3A030866	3379.67	3033.14	3497.94	1909.67	2364.34	1482.79	2501.95	11.564	11.4148	11.6749	10.994	11.3459	10.634	11.3392	P	P	P	P	P	P	P	chr6	XX-C2158C6.3	AGTCCCTCTGTCCCTCTGTCTCTGCCAACCAGTTAACCTGCTGCTTCCTGGAGGAAGACA	439	ENST00000415530	Ensembl	-	171046865	171045260	noncoding
ASHG19A3A045319	52.3084	39.829	45.8935	172.641	210.504	210.242	210.154	5.84537	5.50569	5.7125	7.351	7.72461	7.69001	7.60087	P	P	P	P	P	P	P	chr11	AP003774.6	AAGATCGCCGGCCACTATGGTTATTGACATGTTGTGCTGTCATCTTCCAAAAACTGACGA	985	ENST00000457725	Ensembl	-	64163303	64161813	noncoding
ASHG19A3A012747	42.056	36.4494	42.6105	40.8545	72.4617	51.675	67.6916	5.53784	5.38791	5.61137	5.18643	6.11953	5.59207	5.8886	P	P	P	P	P	P	P	chr19	AC005392.13	TTCCAACACTGAGACCATTCCACAGCCTCTGAATGACAAGACAGGCCTTCAAAATCAAGA	500	ENST00000419624	Ensembl	+	43665014	43657430	noncoding
ASHG19A3A016424	70.1909	57.1889	49.2251	104.841	82.9562	95.8234	70.6929	6.26612	5.98869	5.81004	6.60378	6.32615	6.50758	5.95186	P	P	P	P	P	P	P	chr2	AC092620.3	GTGGAACTGTATTCTCTAATCAATATTAGCACATACATATTGCCCCAGACTGTACCTCCT	680	ENST00000453636	Ensembl	+	139370737	139362079	noncoding
ASHG19A3A043847	44.7736	16.8454	35.7885	100.672	103.164	86.781	100.252	5.62687	4.3955	5.36812	6.54115	6.64629	6.3571	6.47033	A	P	P	P	P	P	P	chr10	RP11-168L22.2	GGTATTGACCCTTGGCCAATGCTGTGCAATGGATTAACTAAAGATAAAGATGTTCTATAA	391	ENST00000451438	Ensembl	+	43823380	43819112	noncoding
ASHG19A3A049390	12.4614	10.4145	11.3628	45.2468	45.0142	44.3778	55.4046	3.81666	3.81947	3.79292	5.34455	5.40941	5.36626	5.59074	A	A	A	P	P	P	P	chr13	RP11-374F3.4	TCCACAAAAGAGAATTTTCTGATGTGAGAATGGAGGGTGTTGCCTGCAACTACCCCAGAT	508	ENST00000420210	Ensembl	-	30941804	30915495	noncoding
ASHG19A3A037751	29.1119	30.3635	29.8125	15.9186	35.645	34.2254	37.6742	5.02677	5.14241	5.11939	3.74683	5.05871	4.9745	5.00673	P	P	P	P	P	P	P	chr9	RP11-332M4.1	AAATTCAAATTCTCCTGAGGCAAAGGCAGTTAACACCAGTATATAAGGCCAGCCTGGTGG	395	ENST00000419620	Ensembl	-	98368568	98361826	noncoding
ASHG19A3A011706	34.629	21.4544	27.7111	38.7467	39.0561	25.5671	47.4857	5.27092	4.69322	5.01654	5.10962	5.1958	4.53724	5.35838	A	P	P	P	P	P	P	chr1	RP11-145A3.2	ATTGTTTTGGATTACTTAGTGGACTCAGCATGGAAACTGCTTGTGTGGCCCAGCTAGGTA	534	ENST00000428148	Ensembl	-	225923976	225898669	noncoding
ASHG19A3A013208	121.113	109.344	121.458	101.483	148.856	152.798	161.554	7.01742	6.87305	7.05283	6.55494	7.20182	7.20848	7.19942	P	P	P	P	P	P	P	chr2	AC011995.1	TTTTTCAGTCCCTGAAGCTGCTGCTCTGCCCACTCAGGAAGGTGAGGAAGGCAGACGACA	574	ENST00000452701	Ensembl	-	2842163	2838035	noncoding
ASHG19A3A008756	799.446	781.262	660.423	1125.7	367.517	549.677	613.246	9.55189	9.52359	9.34832	10.2214	8.55764	9.1487	9.2304	P	P	P	P	P	P	P	chr17	AK094963	AAACTCTGGATCTGAAGGGAATGTTCATGACTATTTCATCCCTCCTGCTGCCTTGGAGAA	3032	uc002jiu.1	UCSC_knowngene	-	70112157	70067183	noncoding
ASHG19A3A037037	40.9314	30.8911	20.8106	117.495	83.5972	95.7687	80.5306	5.49723	5.16619	4.62089	6.76679	6.33632	6.50655	6.15376	P	P	P	P	P	P	P	chr9	RP11-143M1.7	AGCCACTGCCCTGGAGGACCAGGGGGAGAGTTTGGAGTGAAGTTTAATGTTGCCAATGGA	369	ENST00000272546	Ensembl	-	73344	52452	noncoding
ASHG19A3A015246	10.1117	15.1168	7.9471	95.2958	61.0701	60.2782	52.3368	3.5429	4.25864	3.31094	6.46553	5.86978	5.82009	5.50503	A	A	A	P	P	P	P	chr2	AC093326.3	TCAGAATGCTAGGCTGTCGCTGGTTGTGGATTGAACTCTAGCATCTTATCTCTATTCTAG	762	ENST00000444079	Ensembl	+	578145	558203	noncoding
ASHG19A3A018126	55.2223	77.9667	62.7234	214.719	122.192	95.2977	121.442	5.92395	6.4089	6.14216	7.67775	6.90276	6.49864	6.77087	M	M	P	P	P	P	P	chr20	RP5-1097P24.1	CTTCAATAGTGAATTAGGTTCCCTCTACCATCTGAAATGTTACAGTTCGATAAAATAGGT	439	ENST00000439450	Ensembl	+	22203921	22201191	noncoding
ASHG19A3A039244	67.1603	54.276	55.4109	59.1419	70.3817	57.6138	78.7872	6.20146	5.91405	5.96904	5.74444	6.07983	5.75209	6.1185	P	P	P	P	P	P	P	chr9	RP11-343J18.2	ATTCTGTGGCAGAGATTAAAACAATTTCAGAAGCAGGCACCCAATCCTTCTCTTTGGATG	316	ENST00000441473	Ensembl	+	128921892	128819858	noncoding
ASHG19A3A049893	44.5607	24.3023	22.5592	49.3838	5.9961	26.1159	16.3186	5.61995	4.85185	4.72834	5.47737	2.54255	4.56884	3.7043	A	P	P	P	A	P	P	chr13	RP11-442J17.3	ATGGTACTGTTATTACCCACACCTGATGTCCAGCATATTGGGAACATAGGAGAAGCATAA	746	ENST00000422082	Ensembl	+	19497905	19496028	noncoding
ASHG19A3A051319	21.9574	16.1315	16.8105	22.4963	46.2017	25.6532	44.5466	4.6211	4.33694	4.32988	4.28205	5.44891	4.5414	5.26381	A	P	A	P	P	P	P	chr1	RP4-565E6.1	TTCTGCTTCTGGAGCCTAAGATGGGAAAATGGCAGGTGTCGCAGGTTGCAGGGGAAGGTC	669	ENST00000488578	Ensembl	-	146130539	146093233	noncoding
ASHG19A3A017496	12.1608	15.9045	26.7591	52.0697	20.2441	35.317	42.9955	3.7831	4.31769	4.96884	5.55849	4.21463	5.02105	5.2092	A	A	P	P	P	P	P	chr20	LOC284798	ATGTTACTGATGACATATCGGTAAGGTTCTCCAGGCCCAATTCTTTTTGGGGGACTTTGG	770	uc010gdi.2	UCSC_knowngene	-	25129361	25123633	noncoding
ASHG19A3A037062	83.545	102.551	94.855	201.095	44.0065	188.549	66.5716	6.51089	6.78709	6.71461	7.58085	5.37265	7.52664	5.86334	P	P	P	P	P	P	P	chr9	RP11-125B21.2	ATATGAGAAATGTCACCTCCTGGCTACCACAATAATGCAACTAGGAGTTCTGGTTCTCCG	746	ENST00000424605	Ensembl	-	2570754	2535651	noncoding
ASHG19A3A032891	16.7563	14.0307	15.2226	212.783	233.218	212.178	218.426	4.23042	4.16885	4.19333	7.66419	7.88077	7.70512	7.65599	A	A	A	P	P	P	P	chr1	RP11-71G12.1	GAGTTAACATGTCCAAGATATTTGTTACTGGAAAAAACTGAACAGCAATGCATGGTATGA	471	ENST00000457239	Ensembl	+	157157195	157155177	noncoding
ASHG19A3A017758	5	5.40261	5	29.6328	22.6962	34.298	28.7888	2.37766	2.36371	2.39437	4.7049	4.37996	4.97764	4.59698	A	A	A	P	P	P	P	chr20	RP1-148H17.1	ATTTAAGGAGAAAGGAAGCAGCACAAGTTCGACTCAGCCAAGAAACAGAGGAAGGACATC	750	ENST00000437920	Ensembl	-	46041071	46020672	noncoding
ASHG19A3A037445	481.378	454.76	448.069	597.185	576.466	555.199	579.07	8.87943	8.80423	8.82317	9.25543	9.25248	9.16709	9.14945	P	P	P	P	P	P	P	chr9	RP11-374M1.5	GATCCGTTCACATCTGGAGAGTTTATTTATAACTCCCTCTATAACTCTCTGTTTGGAGGC	439	ENST00000377547	Ensembl	-	45003117	45001906	noncoding
ASHG19A3A037807	96.3859	72.7017	81.4527	89.5155	131.59	82.6872	158.487	6.70772	6.31394	6.50679	6.37524	7.01561	6.28398	7.17149	P	P	P	P	P	P	P	chr9	AK057451	TTCGAGAAGATTTTGTGGCCTTTCTCAGCTGTCTAGGTGCTGTAGGTGCTGTGTTTCTAT	1544	uc004bad.1	UCSC_knowngene	-	102582171	102348067	noncoding
ASHG19A3A013734	57.8402	54.9704	50.8161	48.2591	73.6082	98.2469	105.846	5.98836	5.93273	5.85122	5.43573	6.14526	6.54501	6.55942	P	P	P	P	P	P	P	chr2	AC114752.1	TGCCCTTTACTCTGCGGAGCCCAGCTTCCTACTGCAGTAAACTCTCACATGGCCAAGAAG	289	ENST00000448204	Ensembl	-	64559265	64557619	noncoding
ASHG19A3A039304	33.0333	27.1129	17.9803	40.4151	15.5305	31.1549	21.95	5.20318	4.99563	4.41716	5.16945	3.79838	4.83433	4.17606	A	P	P	P	P	P	P	chr1	RP11-372M18.1	TGAGAGACTGACTCCACACAGCTTTATCTCACCTCAAGGAAATGCTAACATACGCCATCA	492	ENST00000448988	Ensembl	+	209501877	209498800	noncoding
ASHG19A3A000052	48.4627	36.2673	40.5669	86.4834	74.3369	60.8863	59.5267	5.73976	5.38154	5.54237	6.32299	6.16058	5.83571	5.69643	P	P	P	P	P	P	P	chr20		CTGGAACCACCCACTCTGCAACCAGCCGTGAGGCGTGAGGCTCACTCGGAAGCTCCCGGA	773	DQ860411	RNAdb	-	61733671	61726844	noncoding
ASHG19A3A010827	2789.84	2635.56	2660.68	4072.06	5172.09	5108.76	4763.11	11.2894	11.2135	11.2832	12.1039	12.4865	12.4411	12.2686	P	P	P	P	P	P	P	chr1	RP11-122M14.3	TTCCTTAGAATGAGGACCCTGCTCAGTTGCCCCCTCCCAGTCATGTGGTGAGTACTGGGA	174	ENST00000458662	Ensembl	-	211898744	211889269	noncoding
ASHG19A3A031281	31.7878	56.6959	47.3435	57.4326	28.3256	20.9456	23.2476	5.1487	5.9768	5.7539	5.69731	4.71525	4.23194	4.26595	P	P	P	P	P	P	P	chr6	XXbac-BPG181B23.4	TTGATATGAACGTTTTCTCCCACAACTGATTGACTGGACTTTTGTCTCAGGGCAGAGGGA	2141	ENST00000430364	Ensembl	+	31414750	31409443	noncoding
ASHG19A3A015366	263.878	207.247	262.779	348.232	325.102	216.761	321.894	8.06534	7.74531	8.09472	8.42763	8.38213	7.73738	8.24715	P	P	P	P	P	P	P	chr2	BC068572	ACAAAACACAGTCTGACTTAGAGATTCTCTGGCATGACTCTCTTCCCCACTGTGTACACT	3008	uc002rdf.2	UCSC_knowngene	+	20084807	20068620	noncoding
ASHG19A3A040632	11.3519	11.7638	7.22146	251.027	238.077	239.068	267.584	3.6909	3.96395	3.19417	7.92378	7.91224	7.88632	7.96801	A	A	A	P	P	P	P	chrX	RP11-309M23.1	CCGTCAACAAAACGCTAATAAGTGCAGAAAGACTGTTTAGCAGGAAACATGTCCAAAAAA	588	ENST00000420865	Ensembl	+	955100	950955	noncoding
ASHG19A3A018009	46.8448	40.6402	49.7885	46.5352	78.6856	46.0823	91.1642	5.69107	5.53008	5.82392	5.38374	6.24528	5.42359	6.33034	P	P	P	P	P	P	P	chr20	RP4-779E11.3	TTTGTGCAAACCTCAGAACTGTGTCCTCCAAGGGCCTGGGGTATTTGGCAGGCGCTGTCT	480	ENST00000419003	Ensembl	+	4176375	4173713	noncoding
ASHG19A3A013597	19.5305	20.9663	18.7085	17.1333	35.1078	25.7922	45.1149	4.45648	4.66483	4.47413	3.86058	5.03623	4.54994	5.28036	A	P	P	P	P	P	P	chr2	AC073283.4	GGCAGACAGTGAGGGCAGGATGGTAGAAAATGTGTTGACTCAGTGCCAGACCCTGAACTA	577	ENST00000448713	Ensembl	-	47572128	47419543	noncoding
ASHG19A3A042806	23.7392	23.5427	29.4341	46.9664	14.3619	167.596	5.10368	4.73839	4.81004	5.10083	5.39807	3.67056	7.34705	2.34072	A	P	P	A	A	P	P	chr10	RP11-346D6.6	ATTGTACCCTTCAAGCAGCCCTGGAGAGTTTATCTCTGCATGCTGGAGCTAATAATAATA	570	ENST00000422763	Ensembl	-	54230293	54211073	noncoding
ASHG19A3A037038	23.6518	40.1259	31.3177	224.382	261.417	269.166	299.619	4.73149	5.51407	5.18373	7.74925	8.06274	8.06807	8.14342	P	P	P	P	P	P	P	chr9	RP11-143M1.3	GGTGTGTGGATACTGTTCAACCTGGGACATGGAGTAAATAAATGGCAAGGAAGATTACAG	612	ENST00000435421	Ensembl	-	102850	100803	noncoding
ASHG19A3A014131	149.188	68.6188	138.273	172.66	114.232	147.847	112.043	7.29623	6.23428	7.23083	7.35137	6.80214	7.15948	6.64448	P	P	P	P	P	P	P	chr2	AK096621	CAGGAAAATGTAAGGAAAATTGAAGGTGTTCTCAAGTGTGTCTGCTGCTGCCTGACACAG	2436	uc002tcj.1	UCSC_knowngene	-	105374177	105363095	noncoding
ASHG19A3A043863	19.0887	15.4601	21.1621	42.7632	35.4431	38.3889	44.6928	4.4227	4.28589	4.64294	5.25415	5.05104	5.14883	5.26913	A	P	P	P	P	P	P	chr10	RP11-168P8.2	TGAATTGCGCACGAATTTTTACACAGCGCCAAAGGAAACTGCCTGTACTTACTGTTGTAG	1974	ENST00000431737	Ensembl	+	44390881	44354858	noncoding
ASHG19A3A052048	27.5026	30.5033	24.3611	631.816	640.859	551.618	683.253	4.94577	5.14803	4.83297	9.33685	9.41444	9.15499	9.4013	P	P	P	P	P	P	P	chr1	RP11-54O7.3	CTTAGGGCAGACCCCGACTTCAGAATTTATACAAATAAATGCAATGAAAAGTGCTGGCAA	1389	ENST00000417705	Ensembl	-	855072	852249	noncoding
ASHG19A3A012637	41.4583	35.7512	37.1546	330.895	331.537	320.145	347.717	5.51677	5.36294	5.42069	8.34749	8.41272	8.33175	8.36316	P	P	P	P	P	P	P	chr1	BC040195	CTACACTACGGATTTCTTAGGATAATTTTGCCCTTACTTAAAAGAAACTGACAGATGTAC	2856	uc001hwe.2	UCSC_knowngene	-	234667522	234663637	noncoding
ASHG19A3A046702	182.649	190.621	193.1	106.956	169.902	195.169	237.156	7.57407	7.626	7.68603	6.63126	7.40199	7.5787	7.78599	P	P	P	P	P	P	P	chr1	AL162400.1	GAAAACTTTGGGCACAAGCTGGAAGGTCATTTACTGCAAACCACTATCTCCCAGCTAATC	157	ENST00000427547	Ensembl	-	63544702	63543751	noncoding
ASHG19A3A016939	109.226	44.6421	95.1195	180.086	144.447	123.011	125.057	6.8743	5.65671	6.71884	7.41962	7.1559	6.88328	6.81015	P	P	P	P	P	P	P	chr1	RP11-380J14.1	CAGCGAAATCTACCAACCAAAGAGGATGTCCATACCTGTCTTTTTCTTTCTTCCTTCATT	4676	ENST00000412427	Ensembl	+	17524112	17516277	noncoding
ASHG19A3A013881	1045.66	992.658	966.832	1335.65	1386.7	1373.39	1435.29	9.91927	9.84844	9.86909	10.4824	10.5747	10.5293	10.5247	P	P	P	P	P	P	P	chr2		GGAAATGAATCCTCTTGTCACATTTGAAGTTATCAGTCATCAATAAAATGGGGATTTGTT	1390	AL832916	RNAdb	-	75156763	75155396	noncoding
ASHG19A3A038350	95.4762	107.07	99.9824	74.3407	147.109	167.507	161.333	6.69336	6.8446	6.78516	6.09053	7.18357	7.34658	7.19726	P	P	P	P	P	P	P	chr9	RP11-390F4.3	ATCTAGTCAATTTGAACCACCTCCTCAACCACCTATGAGGGCCTAAACACTCTTTCACTC	472	ENST00000443688	Ensembl	+	6719370	6718809	noncoding
ASHG19A3A034013	25.4664	13.5755	19.128	23.6161	18.1984	23.5236	28.1327	4.8405	4.13073	4.50689	4.35741	4.04657	4.41174	4.55717	A	P	P	P	P	P	P	chr7	CR623750	CTCCAAGCTTTCACTAACCTTTTAATACAAGTCAATGCTGCAGACTCCTTATTGTAAAAT	1708	uc003sul.2	UCSC_knowngene	+	19153891	19152096	noncoding
ASHG19A3A019187	331.537	303.01	328.399	756.035	718.872	743.997	745.36	8.38399	8.24781	8.40705	9.61624	9.58998	9.61122	9.53061	P	P	P	P	P	P	P	chr21	AP000569.8	CTATGTGAGATTGTATTGCAGGGCTCACATTTATTCTCTCAGCAGCTCATTGCACAGACA	9124	ENST00000427447	Ensembl	+	35349992	35303463	noncoding
ASHG19A3A007301	58.0644	89.361	61.75	78.0371	63.0514	52.2315	62.1336	5.99315	6.59707	6.1219	6.16743	5.92108	5.60675	5.76109	P	P	P	P	P	P	P	chr10	LOC254312	CGTGCAGAAGACCGAGGAGCCATTGGAAAAGAAAAAGAGAACATATATCCCCCTACCTTT	946	NR_024411	RefSeq_NR	-	10994126	10976903	noncoding
ASHG19A3A018142	29.3459	26.6236	16.5052	19.0771	30.945	24.0875	43.1436	5.03757	4.9726	4.30366	4.03095	4.84992	4.44998	5.21488	P	P	A	P	P	P	P	chr20	XXyac-YX60D10.1	TCATAAACCGATCCCTAGCTGGAAATGATCCTAACCTGTGGAAGCTCCTGAATTGAGTGA	797	ENST00000437012	Ensembl	+	23786300	23778777	noncoding
ASHG19A3A043020	83.8265	62.4164	61.9151	88.5682	135.43	69.2857	147.379	6.51443	6.10601	6.12535	6.35854	7.05681	6.03327	7.06675	P	P	P	P	P	P	P	chr10	RP11-589B3.6	AGCATCCCACCATCCATTGCTGCTGCATCAAGGTATTAAAAAGAGAGACAGAAGGAAGAG	606	ENST00000429070	Ensembl	-	81391944	81388512	noncoding
ASHG19A3A036809	58.4751	61.8514	66.651	67.6026	99.6024	99.7473	114.12	6.00295	6.09382	6.22373	5.94359	6.59471	6.56703	6.67274	P	P	P	P	P	P	P	chr1	RP11-445P19.1	ATGTGGAGAAGAAAGAACACTCAGATGTGCCCTGGAGACTTTCCTTTTATTTTTAAACAG	424	ENST00000427337	Ensembl	+	187446354	187412759	noncoding
ASHG19A3A037460	55.809	36.4734	37.4446	29.2231	132.022	139.805	145.877	5.93919	5.3892	5.43333	4.68496	7.02087	7.07315	7.05045	P	P	P	P	P	P	P	chr9	RP11-292F9.1	TCACCGTGAGGTGTGTGACCCATGCTCACATCCAGGGGCCACTCATTCATTCAGGAAACA	931	ENST00000418666	Ensembl	-	46274928	46270785	noncoding
ASHG19A3A040640	218.134	208.444	179.708	124.434	111.724	117.59	139.398	7.81257	7.75217	7.5886	6.86012	6.76976	6.81494	6.97913	P	P	P	P	P	M	P	chrX	RP13-297E16.4	GAAAATCAAAGAGGAACCAACCCAGAAGTATCCCCCAGGACAAATCATTAAGGGGGAAAA	382	ENST00000432272	Ensembl	+	1874878	1853009	noncoding
ASHG19A3A050457	13.669	7.69247	18.4251	27.1733	7.57274	15.9409	16.624	3.94907	3.49416	4.45262	4.57739	2.74443	3.80217	3.73471	A	A	P	P	A	P	P	chr13	RP11-165M6.1	GACGAGGCATGTGGTTGCCATTTCTGTATTACATCCAATTCATATTTCATTTAGAAAATG	631	ENST00000435024	Ensembl	+	107030565	107028910	noncoding
ASHG19A3A000294	243.67	200.297	242.575	76.896	27.4756	60.8701	32.9675	7.9621	7.6954	7.98497	6.14372	4.66799	5.83538	4.80469	P	P	P	P	P	P	P	chr10	SFTA1P	TTCCCTGTGACCTCCTGCAAATAAGGACAGGGACATACTAGGTAGGAGAAGGCAGTTACC	873	ENST00000446372	Ensembl	-	10836877	10826401	noncoding
ASHG19A3A049455	289.49	295.623	322.688	520.01	182.943	147.884	153.651	8.18944	8.2106	8.37912	9.05107	7.5109	7.16002	7.12879	P	P	P	P	P	P	P	chr13	RP11-14O22.1	TGTATCATCTCCTTTTCCTTGCTCCATCCTGCTACCTGAAAAATGGATGTGGTGACAAGC	511	ENST00000414480	Ensembl	-	38058906	38055603	noncoding
ASHG19A3A037076	28.3178	8.78506	26.1283	44.8938	30.5014	23.821	29.5406	4.98564	3.63087	4.93709	5.33298	4.82612	4.43381	4.63718	A	P	P	P	P	P	P	chr9	RP11-509J21.4	GTTTTGCTTTATTTGCTCCTGGTAAAGTCCGCATTTAAAAATAACAGTCAGCTGGGCGCA	676	ENST00000438147	Ensembl	-	3689626	3684075	noncoding
ASHG19A3A029477	18.5753	11.8772	9.81677	22.2695	20.7681	15.795	24.956	4.37963	3.9748	3.59452	4.26427	4.25262	3.78807	4.37963	A	P	A	P	P	P	P	chr6	RP1-309H15.2	ACATTAGTGCAGTCAAGGATCAGGAAACCCCTTTCTAATTTGAGCAACACACATATGAAG	742	ENST00000427775	Ensembl	-	22594062	22589365	noncoding
ASHG19A3A013922	35.3914	30.2934	33.9192	38.3471	54.0938	33.9719	58.9895	5.30335	5.13805	5.28954	5.09284	5.6854	4.96288	5.68253	P	P	P	P	P	P	P	chr2	AC010105.1	CCTTATCCAGCCAATAATGGAGTCATAAAAGTGTACAATATTCTAGGCCTCCTGCTTCAG	687	ENST00000437290	Ensembl	-	82765835	82704258	noncoding
ASHG19A3A042612	5	14.2706	19.9462	51.6248	39.1177	42.9577	53.4837	2.37766	4.18933	4.5646	5.54591	5.19803	5.3157	5.53855	A	A	P	P	P	P	P	chr10	RP11-342D11.3	TTGACCAGAAGCCGTGTTTTGTGGGATTGCCACTTTAATCGCTCCTGTTCATCATTAGGA	552	ENST00000414308	Ensembl	-	33405600	33385184	noncoding
ASHG19A3A042374	5	7.07354	6.26119	39.5453	24.3014	32.2474	30.7819	2.37766	3.40307	3.03183	5.13879	4.4796	4.88555	4.69767	A	A	A	P	P	P	P	chr10	RP11-445P17.8	AACATTGGCAGTTTCAGTTAGGAACTCATATTCCTGTTGGGTCAGAGATTGAGCCCTGGA	692	ENST00000449457	Ensembl	-	5313199	5307995	noncoding
ASHG19A3A031751	64.7329	64.7666	69.5654	180.731	168.499	153.569	167.808	6.14635	6.15548	6.2822	7.42653	7.39025	7.21756	7.254	P	P	P	P	P	P	P	chr6	RP11-46B11.4	GGATTTATAGGCTATAGCTTGGAGCAGATAGTATGAATGGTGATATATGATAAGAGTATC	260	ENST00000435151	Ensembl	+	79980669	79980094	noncoding
ASHG19A3A017416	57.2411	54.6313	63.4092	135.256	101.2	69.1961	111.907	5.97288	5.92464	6.15548	6.98045	6.61809	6.03072	6.64248	P	P	P	P	P	P	P	chr20	HSPC072	TGTCTTCTTGGATGGGCTCTCCACATCTTCCACCACGAAGTAAAAACAATTCTTGTGGGT	1951	uc002wrh.3	UCSC_knowngene	-	18775228	18768614	noncoding
ASHG19A3A044197	76.6658	68.4542	75.1607	145.277	123.44	90.9394	147.423	6.393	6.23176	6.39125	7.08842	6.91952	6.42938	7.06729	P	P	P	P	P	P	P	chr10	RP11-514F8.2	CACGCTACCTCATCCTTTATGACACCCTTTGATATGTTGCTTTTGATGCATTTCTTTGTA	370	ENST00000436500	Ensembl	+	82413488	82409552	noncoding
ASHG19A3A014204	33260.4	33168.5	33462.4	15238.7	14490.5	15015.8	16296.6	14.7765	14.7974	14.8721	14.0713	14.0145	14.0263	14.0811	P	P	P	P	P	P	P	chr2	LOC541471	TGGCCAGTCTCTGTGTGTCTTAATCCCTTGTCCTTCATTAAAAGCAAAACTAAAGAAAAC	557	NR_024373	RefSeq_NR	-	112252692	112186889	noncoding
ASHG19A3A018700	14.8564	26.6982	17.1371	27.1225	27.5519	22.9857	36.0086	4.06697	4.97606	4.35132	4.57429	4.67241	4.37605	4.94253	P	A	A	P	P	P	P	chr21	NCRNA00158	TACAGTCAAGTTCCTGTTGACTAATTCTGTGACCACCAGTGACAGTCTTTGAGTCCGTGA	631	ENST00000439840	Ensembl	-	26802321	26768798	noncoding
ASHG19A3A037578	39.2399	33.5669	37.344	80.4669	64.439	61.1287	78.2808	5.4414	5.27666	5.42845	6.21421	5.95093	5.84191	6.10737	P	P	P	P	P	P	P	chr1	RP11-180A14.5	TATGAACAGATGCGGGCCTTGGGCACTATTTCCTGGCTGCTGAGGTTTATTTGCAATTTT	2625	ENST00000435735	Ensembl	+	200935658	200890121	noncoding
ASHG19A3A043537	32.0546	25.1524	26.6914	22.872	38.7151	18.6455	30.7976	5.15908	4.89524	4.96523	4.30865	5.18283	4.05204	4.69793	A	P	P	P	P	P	P	chr10	AK095699	ACTCCCGGTCCGCATTTGGGATTCTGTATGTAAACCTCAGAATAAATTCAACAAAATTTG	2390	uc001ihd.1	UCSC_knowngene	+	4452804	4426437	noncoding
ASHG19A3A041574	61.9324	59.5309	55.6783	98.8841	117.902	87.6239	118.565	6.0805	6.03968	5.97632	6.51748	6.8498	6.37069	6.73375	P	P	P	P	P	P	P	chrX	RP11-265D19.6	AGAGTCATGTGGCTTATGTGCTGAGGCCTGCCCAGAATTCTGAGATATTAATTATAATTA	405	ENST00000439434	Ensembl	+	134531689	134530353	noncoding
ASHG19A3A044402	44.8774	31.8662	34.0991	40.1649	57.2005	60.6995	58.7171	5.63097	5.2085	5.2973	5.16058	5.77224	5.83067	5.67599	P	P	P	P	P	P	P	chr10	RP11-107I14.2	TCACATTCCCTAAATACTAATGGCAGGGATTTGCTGTGCCCCATGGCTCAGTTAAGTTCT	382	ENST00000442188	Ensembl	+	103071262	103070774	noncoding
ASHG19A3A038782	24.9795	10.636	10.975	44.8252	16.3546	17.6756	19.6762	4.81216	3.8411	3.74777	5.33065	3.88159	3.96607	3.99822	A	P	A	P	P	P	P	chr9	RP11-171A24.2	AGTGATCCTGAAGGGCCACCAAATAAACCTTTGGATGCTTACCTCTATACTTCCTATTGA	648	ENST00000423681	Ensembl	+	76998446	76986446	noncoding
ASHG19A3A017858	19.3689	16.854	20.0942	21.6772	27.6063	15.5636	39.3377	4.44427	4.39676	4.57561	4.22278	4.67632	3.76043	5.06958	A	P	P	P	P	P	P	chr20	RP4-614C15.2	ATTCCATGCCAAGCTTTGTCTCCTCAACAAAGTTGCTCTGCTTGAGCCAGTGAATTCTGT	593	ENST00000424662	Ensembl	-	57932829	57927249	noncoding
ASHG19A3A015751	19.5329	11.7877	15.0673	12.3278	26.9049	21.1188	29.2833	4.45654	3.96711	4.17897	3.32999	4.63385	4.24397	4.62395	A	P	A	P	P	P	A	chr2	AC092669.3	GAGGAAGAAAGCCCTCTGTTAATTTGAAGCTGAGCATCTGATCCACTAAAATTGACAAAA	1679	ENST00000428647	Ensembl	+	66619582	66610437	noncoding
ASHG19A3A041790	50.0432	41.1301	46.7388	62.8513	28.0824	62.0015	27.3019	5.78314	5.54721	5.73675	5.83586	4.70135	5.86192	4.50894	P	P	P	P	P	P	P	chrX	U00684	GGAGCCTTCCTACCGCTGGTGAAATCTAGGAGTGGCAGTTGAGGGCTTCTGTTCACAAAG	552	uc004fnm.2	UCSC_knowngene	+	154716706	154697946	noncoding
ASHG19A3A030059	113.773	118.278	118.04	57.9829	41.0796	35.1831	47.121	6.92945	6.97843	7.01225	5.71296	5.27327	5.01636	5.34763	P	P	P	P	P	P	P	chr6	RP11-524H19.2	AAATGTTACGATGATTGAGGGCTGTACTGGTATTTGGTGGGCAGGGAATGACAATGTCCT	586	ENST00000425089	Ensembl	-	54705653	54704915	noncoding
ASHG19A3A015759	1944.83	1743.48	1632.32	1836.86	1026.13	854.016	1218.02	10.7832	10.6185	10.5919	10.9363	10.1198	9.80784	10.2788	P	P	P	P	P	P	P	chr2	AC023115.4	AATATTATGTCAGTGAAACCAAATAATGTGTCTCGGTTCCTCCCCCTGAGCATTCCACCC	574	ENST00000450944	Ensembl	+	67552436	67551758	noncoding
ASHG19A3A015480	71.7707	63.9427	63.4534	109.108	92.0877	95.6577	107.634	6.29921	6.13805	6.15606	6.66089	6.47644	6.50486	6.58613	P	P	P	P	P	P	P	chr2	AK123934	CATGAGAATTGGGAAGAGAGAAAGCCTATAGTGATAATAAAGTCAAATTATCCTAAACGC	1512	uc002rng.2	UCSC_knowngene	+	30575295	30573783	noncoding
ASHG19A3A044180	84.444	65.2723	77.4727	50.7984	37.1819	27.4952	44.0013	6.52275	6.1668	6.43329	5.5224	5.12232	4.64461	5.2438	P	P	P	P	P	P	P	chr10	MBL1P1	CTTTGATATAATGCCTCATTCAGAACTTCATTGGCAGAAGTTGACTGAGATCAGAGGCCC	818	ENST00000453174	Ensembl	+	81691557	81664653	noncoding
ASHG19A3A013209	58.748	46.8393	62.6843	57.8167	74.3026	44.578	78.5926	6.00881	5.72236	6.14098	5.70793	6.16004	5.37504	6.11381	P	P	P	P	P	P	P	chr2	AC011995.3	CTGCATGGAATAATGAACCCACAGCTTTGGTGAATAGGCAGCCACCTCTGCCACATATCA	578	ENST00000437610	Ensembl	-	2875003	2874329	noncoding
ASHG19A3A016183	23.8616	27.1867	21.0224	26.0211	28.4811	27.4256	32.7682	4.74661	4.99904	4.63563	4.50769	4.72397	4.6409	4.79582	P	P	P	P	P	P	P	chr2	AX747531	TCTGTTGTATTTCCGAACGAATGAGTACGTACGTAACAGTTATCGTGTCTCCTTGTAACT	732	uc002thg.1	UCSC_knowngene	+	112249838	112249106	noncoding
ASHG19A3A043038	20.577	26.0191	17.7281	10.5887	13.7538	21.2114	20.1841	4.52959	4.93883	4.39614	3.10918	3.59468	4.25139	4.03783	A	P	P	P	A	P	A	chr10	RP11-137H2.4	TCACAATGAAGTCGACTGTTTCGTCGAGGGAAGTGGCCACCGTTGATAAAATGAAAAGAC	598	ENST00000417559	Ensembl	-	82295698	82289352	noncoding
ASHG19A3A049911	16.3176	28.3655	13.1176	33.5301	23.5456	15.5426	13.132	4.19199	5.05507	3.98059	4.88886	4.43182	3.75797	3.33661	P	A	A	A	P	P	P	chr13	RP11-264J4.5	GTTGATTTTATCACTGAAAGCCCAGCTCTGTGGTACATTCTAGAAGCTCTCAACATCTAA	431	ENST00000455848	Ensembl	+	20677369	20676839	noncoding
ASHG19A3A040577	258.015	184.363	278.832	202.079	474.624	505.021	554.471	8.03738	7.58085	8.1809	7.58844	8.95808	9.02698	9.08365	P	P	P	P	P	P	P	chrX	XX-FW83128A1.2	GGGTTGTAGCTTCTTCCTTCACCAACTCTGTTACTTCAGTATCCCTTTTGCACTTTCAGC	341	ENST00000433825	Ensembl	-	153563387	153562309	noncoding
ASHG19A3A000272	33.1983	29.8386	24.1412	31.2426	41.7336	51.6024	61.9311	5.21086	5.11919	4.81868	4.78594	5.29463	5.58918	5.75561	P	M	P	M	M	M	M	chr1	RP11-404O13.1	TGGTCAGCTTTTCCTCAGTGGAGTGGTCAGCAGTCCAACTACCAGGGCCAGAGCCCCATC	649	ENST00000442358	Ensembl	-	158110420	158101833	noncoding
ASHG19A3A049607	252.843	262.15	240.115	453.463	109.529	351.323	149.051	8.00877	8.05241	7.96939	8.82825	6.73891	8.46167	7.08275	P	P	P	P	P	P	P	chr13	RP11-168P6.1	GCATCCTGTCTCCCATTTTTGCTAAAATTCTATCTAGAGAAAGAGCTCATTTTTAGCTAA	1058	ENST00000423442	Ensembl	-	54707001	54689923	noncoding
ASHG19A3A018418	101.632	58.7305	85.4252	168.109	137.293	105.556	130.448	6.78114	6.02223	6.5752	7.31234	7.07816	6.6512	6.87282	P	P	P	P	P	P	P	chr20	RP5-991B18.1	TGAATCTCCAGCTCAACAACTCTCAGACTTGAGAGGCAGCACCGGCAACTCCCCAAGGCT	277	ENST00000457536	Ensembl	+	47130447	47100222	noncoding
ASHG19A3A030621	24.8943	30.844	29.2128	39.9224	28.3225	19.7376	39.7817	4.80667	5.16359	5.09091	5.15162	4.71484	4.14088	5.08918	P	P	P	P	P	P	P	chr6	AK123801	GTTTTCAAAAAACTTCTCCAAGGGAAACTCTTTGAAGTGTTTTTACTGCCATTTGATCAG	1690	uc003qiq.1	UCSC_knowngene	-	139795733	139790131	noncoding
ASHG19A3A029982	12.3887	11.7582	12.1593	33.7532	41.3924	40.5548	46.9	3.80896	3.96305	3.87808	4.89934	5.28362	5.22752	5.33956	A	A	A	P	P	P	P	chr6	RP11-550C4.6	GAAAGAAGCAGCTCTTCCTTGAAATCTTCTGAGACCTCAACAGAGGAAGCTTATGGGAAT	197	ENST00000446733	Ensembl	-	47708477	47697562	noncoding
ASHG19A3A030920	38.1391	27.4645	41.1781	35.4905	44.2673	42.524	54.4918	5.40123	5.01291	5.56146	4.97629	5.38339	5.30261	5.56508	P	P	P	P	P	P	P	chr6	RP3-400B16.1	GTGCATCTGAGATCTAGCAAATTTCCCTGTTGGCCACATACTGATAATGATGTATTAAAA	477	ENST00000427049	Ensembl	+	4156133	4155169	noncoding
ASHG19A3A015672	249.362	251.724	216.375	322.191	296.325	281.588	343.41	7.99248	7.99909	7.8325	8.30366	8.24388	8.13759	8.34382	P	P	P	P	P	P	P	chr2		AAAGGCTGTTGGCTGTTGTATCTTGTAAACAATTCAACGCAATGCCAAGTGAAAATGAAG	2409	AL110130	misc_RNA	+	55858573	55852072	noncoding
ASHG19A3A015267	11.302	5.05496	5	62.5145	58.9181	64.584	75.9961	3.68364	2.32418	2.39437	5.82968	5.81531	5.92898	6.06435	A	A	A	P	P	P	P	chr2	AC019172.2	GGTAACAAAACAACAAACACCATGAGAACAAAATGTGAACCATGTTGTGAAGAAACAGTC	717	ENST00000451101	Ensembl	+	3895001	3891773	noncoding
ASHG19A3A041626	24.1826	18.9091	42.6546	115.774	30.9031	72.6012	57.163	4.76615	4.53689	5.61366	6.74305	4.84734	6.10317	5.63926	A	P	P	P	P	P	P	chrX	RP11-298A8.2	GTTCATGACCCGTCATCTGCATGGTGGTGCAGGAAGCTCTTCTTTCTCTTCGTACATGAG	217	ENST00000413328	Ensembl	+	140079613	140013902	noncoding
ASHG19A3A000288	193.243	155.648	151.98	275.534	142.853	131.083	163.216	7.65545	7.35479	7.3597	8.06572	7.13763	6.97777	7.21435	P	P	P	P	P	P	P	chr6	DAQB-12N14.5	ACTGAGAAGCATGCACTGTGACCTGCACACCCAGCCAAACCTGAGCAAGCACCCCCACCA	399	ENST00000445296	Ensembl	+	29499934	29497252	noncoding
ASHG19A3A050256	45.7171	46.8443	45.5806	48.7899	44.2395	45.6796	69.3699	5.65946	5.72246	5.70507	5.45578	5.38213	5.40895	5.9279	P	P	P	P	P	P	P	chr13	RP11-473M10.3	CAGTCTTTTGTATTACATTTCTCCTGTCTAAATCAACTGTGTGGTTTCTACTCATTATGG	776	ENST00000418943	Ensembl	+	64325213	64322131	noncoding
ASHG19A3A028885	21.1325	16.5971	17.2005	26.3688	32.023	21.0199	30.7668	4.56529	4.37521	4.35594	4.52977	4.89712	4.23693	4.69694	A	P	A	P	P	P	P	chr1	RP11-39H13.1	TTTTGAAAAACCCAGCTGGACAATGGGCATATTCAATGGCCAAGGCCTCCTCTAATTGCT	511	ENST00000442182	Ensembl	+	117863958	117838141	noncoding
ASHG19A3A015837	22.1761	20.4349	32.8526	31.0709	39.2451	43.7991	49.9802	4.63385	4.63541	5.24864	4.77686	5.20318	5.34581	5.43401	A	P	P	P	P	P	P	chr2	AC073046.25	CTTCACCCTTGTAGACTCTTGACTGTTCTAGGCGAGAAGGACCTGTTGGTGGCCTTTGGA	390	ENST00000441217	Ensembl	+	74213470	74212258	noncoding
ASHG19A3A040065	596.592	521.191	577.191	132.737	211.868	229.497	255.885	9.16624	8.9787	9.15693	6.95113	7.73436	7.82316	7.90571	P	P	P	P	P	P	P	chrX	RP11-69A21.2	TGAAGTCCTGTTGGTCCCTACCGGCACATCACACACTCCTGGAAGCATGATCTTCACTCC	451	ENST00000458170	Ensembl	-	72028044	72027258	noncoding
ASHG19A3A019206	86.2485	77.983	75.0004	81.0233	117.39	116.916	120.793	6.55065	6.40965	6.38861	6.22563	6.84448	6.80494	6.76279	P	P	P	P	P	P	P	chr21	AF015262.2	TTTACAAACAAATGTTCTCAAGGGGCAGACAGCACACCCTTGCCTCATGACATTGCTCTA	698	ENST00000455028	Ensembl	+	36511519	36508934	noncoding
ASHG19A3A013962	426.831	434.376	413.99	87.8781	89.099	86.8015	82.0841	8.72627	8.74162	8.72311	6.34632	6.4267	6.35728	6.1795	P	P	P	P	P	P	P	chr1	FAM87B	CAGATCAGACAACCAACCACACAAAGTTTCTAAGAGCAAACTGTTCAGGTCGGCAAGTCA	1944	ENST00000326734	Ensembl	+	755214	752750	noncoding
ASHG19A3A041099	76.3229	68.0237	54.0629	136.18	59.2779	45.913	44.1262	6.38702	6.22236	5.93492	6.98877	5.82673	5.41757	5.24844	P	P	P	P	P	P	P	chrX	RP11-368D24__A.1	GGGAATCTTTTTTGCAAACAAAACTCTGGCCCATTAAGAACTCTCTGCTGCCTTGTGAAG	487	ENST00000429601	Ensembl	+	64820630	64808277	noncoding
ASHG19A3A050192	235.651	257.628	265.985	224.181	315.624	242.364	345.487	7.91977	8.02959	8.11295	7.74757	8.33712	7.90875	8.352	P	P	P	P	P	P	P	chr13	XTP6	TGCTTAAGAGGCATCACTGGAATCCTACGGTACCACAGACCAGAGCCTTCCCTTCCCTTC	1348	uc010tgn.1	UCSC_knowngene	+	51102670	50656413	noncoding
ASHG19A3A010907	38.1333	36.0794	35.943	19.8542	59.2342	35.4944	68.0783	5.4009	5.37572	5.37437	4.0908	5.82522	5.02939	5.89763	P	P	P	P	P	P	P	chr1	RP11-338C15.3	TTGTATCTGTAATGGTGGAGTCTCAGGCATTGACTTCCCAGGTGAAGGAAGGGTGATTTT	473	ENST00000446962	Ensembl	-	212838776	212827340	noncoding
ASHG19A3A045978	29.3002	15.2906	21.8379	40.1208	41.5211	42.962	39.6101	5.03502	4.27205	4.68496	5.15937	5.28778	5.31583	5.08197	A	P	P	P	P	P	P	chr11	AC051649.6	TGAAAACGTGCTCCTGGGTCACGGAATTCATGCTGAGACACAGCCACACACAGCCAGGCT	722	ENST00000418612	Ensembl	+	2014699	2012325	noncoding
ASHG19A3A046525	29.1613	32.5107	30.9436	46.8069	57.1407	44.5177	67.0266	5.02896	5.23745	5.16959	5.39358	5.76998	5.37199	5.8741	P	P	P	P	P	P	P	chr1	LOC729467	ATCATGGAGGTTAAATGTCCAACCTGTTGTCACTGTGCACCTCAAAATAATAAATAAAAC	1043	NR_027120	RefSeq_NR	-	59612479	59597609	noncoding
ASHG19A3A030889	39.3176	28.5973	29.8957	116.66	32.2874	102.207	69.1978	5.44436	5.06415	5.122	6.75465	4.90929	6.60331	5.92353	A	P	P	P	P	P	P	chr6	RP1-90J20.2	ACAGAGACCCAAATAACATTTGAATTGGACTCTACCTGCAAGTGGAGCTTTACCATCCAG	484	ENST00000437718	Ensembl	+	2917967	2917127	noncoding
ASHG19A3A000230	26.5768	23.6111	25.9754	35.4357	50.0606	31.8958	46.1155	4.90293	4.81497	4.92726	4.97336	5.56818	4.87009	5.31172	A	P	P	P	P	P	P	chr9	C9orf44	AGCAGGCAGCTTCTTCTACACTCATGCCAAATTCCATGTCAGTAGTGGCAAACCTTTACA	796	ENST00000434944	Ensembl	+	94920770	94914875	noncoding
ASHG19A3A048313	65.932	50.663	63.9199	75.52	83.4924	62.534	104.101	6.17338	5.82603	6.16571	6.11583	6.33515	5.87706	6.53162	P	P	P	P	P	P	P	chr1	RP13-614K11.2	AACACTGCTTTCACTGAGTGTATGAAGTGGTTTCTCCATCCGTGTGGCTTTACCTGAACT	937	ENST00000425194	Ensembl	-	4009040	4007208	noncoding
ASHG19A3A014697	56.067	41.3064	45.2277	221.513	236.726	275.553	264.861	5.94647	5.55288	5.69413	7.72908	7.90481	8.10698	7.95403	P	P	P	P	P	P	P	chr1	RP3-395M20.9	TGCTACTGAGTGGACAAGCTTACATGAAATGACTGTTTTCACATATGTGGCACCAGGCAG	626	ENST00000424215	Ensembl	+	2515972	2512998	noncoding
ASHG19A3A030986	166.549	150.997	132.552	114.094	162.177	196.168	180.204	7.45144	7.31041	7.17352	6.72383	7.33319	7.58544	7.36564	P	P	P	P	P	P	P	chr6	RP11-716O23.1	TCTAGTAGTTCTTTCATCTCAGTCTTTTGAAAGCAACTTCCCCTCTTTAACCAACACCTG	699	ENST00000419796	Ensembl	+	11481472	11417582	noncoding
ASHG19A3A047519	38.2786	39.32	35.115	37.949	20.5183	29.609	27.1309	5.40722	5.48852	5.3388	5.07659	4.23451	4.75884	4.49841	P	P	P	P	P	P	P	chr1	RP11-475O6.1	GAAGCCTCTGTGAGGTCCAGCTGACTACTTCATTCTCATAAATACTTTCTTTGAAATCTC	1991	ENST00000457273	Ensembl	-	84326229	84267198	noncoding
ASHG19A3A011792	314.947	303.256	314.888	496.379	325.714	314.137	593.5	8.30935	8.24963	8.34732	8.98021	8.38499	8.30192	9.18545	P	P	P	P	P	P	P	chr1	RP11-344F13.1	TTATTCATGACCTTCATCTACCTTCCCTTTCATCAAGTAAATGGAAATGTGTCATTCTGA	282	ENST00000449215	Ensembl	-	14549613	14548385	noncoding
ASHG19A3A036854	85.0439	63.5599	63.0629	81.3499	98.7076	48.6444	128.372	6.53295	6.13049	6.14895	6.23249	6.57939	5.50315	6.8498	P	P	P	P	P	P	P	chr1	RP11-373J16.1	CCCTGTTCTTATTATGCAAAACGTAAGAACTATCCTTTTCCACCATCTCTTTGAAAAATC	784	ENST00000445072	Ensembl	+	189006393	188874818	noncoding
ASHG19A3A014255	25.4788	8.98756	25.8082	9.23998	25.2151	25.5946	14.9632	4.8416	3.6555	4.91862	2.91837	4.53556	4.53837	3.55913	A	P	P	A	P	P	A	chr2	AC093901.1	AACACGTGCGGTGGCTTCAAAGGAGGAGGGAGAGTTGAGTTTAAACTAATGAAGTAAAGG	778	ENST00000414886	Ensembl	-	118943962	118889703	noncoding
ASHG19A3A013245	638.045	590.331	601.207	207.555	122.142	177.714	132.337	9.25894	9.14197	9.21631	7.62869	6.90227	7.4364	6.89686	P	P	P	P	P	P	P	chr2	AC017076.5	CATCCAGTGAAGACTTCCTCTGGATTATTGCAGCAGACACCTCTAACCTCCTTAATCTGT	506	ENST00000414795	Ensembl	-	6980595	6969010	noncoding
ASHG19A3A049881	35.4572	34.426	30.5971	29.4759	36.9288	35.6494	42.294	5.30633	5.3095	5.15311	4.69767	5.11025	5.03638	5.18537	P	P	P	P	P	P	P	chr13	AL845154.2	TGGTATTTGCAGATCCTCTCCAAAAAGAGTTCACCGATCTCCTAAGACTGCAAACCTGAC	514	ENST00000446989	Ensembl	-	115099423	115095033	noncoding
ASHG19A3A050252	98.267	94.1808	104.181	155.143	43.8022	133.256	60.1836	6.73554	6.6737	6.84278	7.18842	5.3659	7.00345	5.71094	P	P	P	P	P	P	P	chr13	OR7E156P	ATTTACTGATTGTGTATTGGTGAATTGGTGCTGGCTCTCAGTTCCCGCCTCGCGGCGGGG	2647	NR_002171	RefSeq_NR	+	64316701	64311567	noncoding
ASHG19A3A033489	837.631	842.434	819.031	732.091	665.859	674.718	706.387	9.61058	9.63408	9.64278	9.56387	9.47854	9.45957	9.45552	P	P	P	P	P	P	P	chr7	AC000123.2	TCCAGTCTAAAATAGTTTTGGTTTGGATATTGTCTTCCATTAAAGTTTCAGTACGCAGAG	4975	ENST00000491363	Ensembl	-	127004813	126999838	noncoding
ASHG19A3A050135	75.8922	78.1894	87.7027	122.932	165.401	107.921	207.227	6.37825	6.41283	6.61135	6.84084	7.36166	6.6838	7.58114	P	P	P	P	P	P	P	chr13	RP11-290D2.3	CAAAAGTCAATCACAATATCAGTTCCTTCCTCTACAGAGTGTTAAAAGTTTCTCGGCTGG	310	ENST00000420693	Ensembl	+	45925485	45924457	noncoding
ASHG19A3A048491	945.139	883.75	869.032	633.86	877.476	539.653	864.43	9.78442	9.69979	9.72608	9.34561	9.88657	9.1197	9.76162	P	P	P	P	P	P	P	chr1	RP11-148B18.4	ATGTGTGATCCCCCTCCAGAAAAGACTTGAGTCTTTACAGTTGGAATTTCCGTGTCGTGA	592	ENST00000414039	Ensembl	-	94790125	94784034	noncoding
ASHG19A3A051103	253.541	257.015	240.952	129.231	130.805	122.276	148.524	8.01477	8.02661	7.97554	6.91108	7.00703	6.87366	7.07751	P	P	P	P	P	P	P	chr1	RP11-458D21.1	ATGTATAGGACCATGCATGGTGATCTCCTCCAGACAAAAGTAAATGCTGGTGCAGAACAG	814	ENST00000433081	Ensembl	-	145382397	145376124	noncoding
ASHG19A3A032509	34.2747	41.1358	30.2422	50.3879	51.0531	69.2849	53.0009	5.25744	5.54751	5.13913	5.50853	5.59336	6.03314	5.52485	P	P	P	P	P	P	P	chr7	AC019117.2	TTGACAACACATTATTTCCTGAGGAAACTTTTGACTTCTGGTGACTTGGGCCCCAGGCAA	589	ENST00000439046	Ensembl	-	17500296	17474100	noncoding
ASHG19A3A039325	874.595	817.778	784.512	1195.23	1268.7	1253.76	1260.42	9.67302	9.59107	9.58467	10.3077	10.4319	10.395	10.3368	P	P	P	P	P	P	P	chr9		GTTTTATTTCTTATAACTGTACAGGAATCTACAATGATTGTAACAAAAATTTCAATTAAG	1971	AK057050	NRED	+	132269222	132267249	noncoding
ASHG19A3A040464	51.3529	64.0806	54.736	21.7159	86.5069	93.3982	105.34	5.81832	6.14137	5.95351	4.22632	6.38445	6.46928	6.55032	P	P	P	P	P	P	P	chrX	RP1-137H15.2	TTAGAAATGACCCTTGCCCTGATCTGAGGTGGAAGAAATAAAGGTCTGGTAAAGAAATGA	304	ENST00000456631	Ensembl	-	136646084	136638349	noncoding
ASHG19A3A019380	37.5946	44.4551	47.3801	114.707	43.8168	83.0187	52.6598	5.38271	5.65195	5.75561	6.73007	5.36626	6.28946	5.51407	P	P	P	P	M	P	P	chr21	AP001476.3	TTTTACCAACAGAGAATCTCCAAATCCAGCCTTTTACCAGAAGCCTCTCCGAGAAACTGG	355	ENST00000435738	Ensembl	+	47477481	47476429	noncoding
ASHG19A3A037390	5	5.59073	5	512.037	475.564	517.289	539.207	2.37766	2.69913	2.39437	9.02564	8.96339	9.05779	9.03955	A	A	A	P	P	P	P	chr9	RP11-144A16.5	TTTAGCAAGCATTTCCTTAGCAAACACGCTCCTAGCAACAGAGAGTAAGTTTTGTAAGGG	482	ENST00000415013	Ensembl	-	41550387	41529582	noncoding
ASHG19A3A012653	17.8817	7.00168	13.4855	37.3257	50.2022	34.0631	23.6411	4.32694	3.39116	4.01999	5.05074	5.57142	4.96857	4.29193	A	A	A	P	P	P	P	chr1	BC016972	AGGAATACTGCTGTGACCGCAAAACTGTTTCTGTAGAATTTTCTCCGGTGTGGTCATCCT	886	uc001hwk.3	UCSC_knowngene	-	235099746	235093091	noncoding
ASHG19A3A038432	34.4633	22.5333	30.278	21.1827	15.6876	8.13415	5	5.26381	4.75162	5.14104	4.18839	3.81381	2.78418	2.32841	A	P	P	A	P	A	P	chr9	AX747623	AGAGAATTCTACTTTGACCCTGGCTTAAGAGTGGAACATAGATGTCTATAAAACTATGTG	2347	uc003zpq.1	UCSC_knowngene	+	22824212	22646198	noncoding
ASHG19A3A019881	397.232	367.915	385.571	460.371	397.859	444.678	494.153	8.6243	8.51971	8.63195	8.85589	8.67617	8.82657	8.9065	P	P	P	P	P	P	P	chr22	BC038245	GTTTTCAGGTTTCTGCCTGACATTTAATATCACAAACATTGAGCCTGCTCCTGTCCCCCA	1074	uc003bcm.2	UCSC_knowngene	-	42765180	42760536	noncoding
ASHG19A3A000160	5	5.96724	5	31.2244	17.8564	19.4664	20.3833	2.37766	3.15572	2.39437	4.78431	4.01847	4.11781	4.05437	A	A	A	P	P	P	P	chr2	AC073218.2	GGCCAACTAGTCATCAGTTTATTCATGTTTCTGGGATTGGATTCATGAACTCATCCTTTG	1109	ENST00000423663	Ensembl	+	34947630	34902645	noncoding
ASHG19A3A050013	74.8423	64.6804	78.5866	152.078	51.2396	142.063	51.4456	6.35695	6.15325	6.4537	7.15633	5.59932	7.09583	5.47632	P	P	P	P	P	P	P	chr13	RP11-490N5.1	ATCTCGTCACGCTCCTAGTTTCCAAGCCCACACACCTGAGGGTCAATGTCCCTTATTGCA	374	ENST00000435044	Ensembl	+	30728723	30728202	noncoding
ASHG19A3A016047	50.6935	18.0377	50.6081	82.5569	33.2962	23.6562	32.9084	5.8026	4.47847	5.84621	6.25308	4.95159	4.42063	4.8012	A	P	P	P	P	P	P	chr2		CAGTCTCCATTCTCTCTTCAGGAAAGAGGCCTACTCGCAGATGAACGCACCAAGGCTCAG	339	BC105019	NRED	+	100865566	100825111	noncoding
ASHG19A3A044131	264.174	246.962	252.729	400.689	468.082	255.209	442.601	8.06736	7.97475	8.03856	8.63804	8.93928	7.98569	8.73385	P	P	P	P	P	P	P	chr10	AK023445	ACTTCTTTATGAAGGACTCCAGCCTGGTGGAGATGAATGAGTCCTGAAGATGGAATCGAA	1860	uc001jxd.1	UCSC_knowngene	+	77121436	77056147	noncoding
ASHG19A3A041609	17.0861	21.9967	16.5072	16.0981	21.9241	18.8888	27.2285	4.25472	4.72173	4.30395	3.7618	4.32816	4.07273	4.50406	A	A	A	P	P	P	P	chrX	RP6-27P15.2	TACTCAATCATTATCCCATACGTTTCTCTTACTCTAATTGCTAACTTTACACAGCATTAA	142	ENST00000411940	Ensembl	+	137709504	137709237	noncoding
ASHG19A3A017262	58.1062	53.1393	62.6338	54.5802	73.0365	41.9955	82.7945	5.99389	5.888	6.14029	5.62413	6.1309	5.28308	6.19138	P	P	P	P	P	P	P	chr20	RP4-673D20.3	AAGAAGAATAATGATAGGTCCTACACCCTGGAAAAGCTGCTGCTGGTGAATGCATCAGTG	1372	ENST00000418979	Ensembl	-	1760643	1748605	noncoding
ASHG19A3A017809	17.7693	13.4322	21.3842	22.6487	25.0056	27.5788	22.462	4.31726	4.11711	4.65686	4.293	4.52115	4.64939	4.21069	A	P	P	P	P	P	P	chr20	RP11-80K6.2	GGAAAACAAAGCAGGAGATGAAGGGTTCATAGAGATAAACTTCTTCCTATTTTGCCTGGG	459	ENST00000426963	Ensembl	-	51479394	51474876	noncoding
ASHG19A3A040641	40.4485	25.9807	37.6542	31.1465	47.5987	49.7232	50.4969	5.48207	4.93657	5.44059	4.78049	5.4917	5.53351	5.44891	A	P	P	P	P	P	P	chrX	RP13-297E16.5	AATGGGACCTATTTCACCTGGAGTGTCGCATCCACCAATATCAATGCTGCTGAAATGAAG	548	ENST00000453953	Ensembl	+	1887669	1886239	noncoding
ASHG19A3A018374	95.4026	84.8466	85.8462	258.75	285.744	291.612	308.167	6.6927	6.52236	6.58223	7.97222	8.19251	8.19409	8.1857	P	P	P	P	P	P	P	chr20	RP3-461P17.10	TCTGAGGATGCCCCAGACAGGGCCTGTGGCTGCTTTCTGAAATAGTGCAGCACCTTCTCT	514	ENST00000424705	Ensembl	+	44076982	44076041	noncoding
ASHG19A3A049718	40.1737	31.4314	33.5012	69.6692	16.0542	56.4104	22.3414	5.47246	5.19033	5.27473	5.99332	3.84933	5.72469	4.20074	P	P	M	P	P	P	P	chr13	RP11-75N6.2	CTGTCTCTTGGCTTCCTGAGAATCTGTCGTGATTAAATAGTGAATGAAAGAAACTGAATG	685	ENST00000435401	Ensembl	-	90206058	90200944	noncoding
ASHG19A3A007876	415.503	338.3	339.691	1083.7	731.238	1036.01	838.562	8.69022	8.40231	8.45402	10.1649	9.61237	10.1085	9.70917	P	P	P	M	P	P	P	chr17	C17orf44	AAAGTCTCAGATCAAGGATTCGGAGAAAGGTCTCTACAGGTCCCTCCTCGTTAGTATAGT	2115	NR_026951	RefSeq_NR	-	8127361	8123948	noncoding
ASHG19A3A019379	77.1941	60.3942	80.6217	102.047	117.175	127.01	120.148	6.40313	6.0599	6.49264	6.56333	6.84228	6.93158	6.75499	P	P	P	P	P	P	P	chr21	AP001476.4	TGGTTTCTCCACAGCCGCTGCAGCCACGAGGAGAAGGCCACCCTCTCGCGTTCAAACACA	415	ENST00000429512	Ensembl	+	47473019	47472509	noncoding
ASHG19A3A014101	61.6892	50.5317	34.6281	28.3074	57.2902	58.422	76.4085	6.07434	5.82308	5.31825	4.63579	5.77563	5.77326	6.07242	P	P	P	P	P	P	P	chr2	AC092168.4	ACAACATCCCGACTCCATTCCAGAGCAGCTGGGAGCCTACAGCAGCCTAGGAATCTCCAT	236	ENST00000443030	Ensembl	-	101339344	101338682	noncoding
ASHG19A3A039082	100.967	74.6385	99.5393	121.708	135.135	92.7851	168.163	6.77198	6.34868	6.77899	6.82683	7.05332	6.45906	7.25703	P	P	P	P	P	P	P	chr9	AK093363	ATTGTATCACATGGACTCGGTGTTGCCTCCTTATTGAAAGACATTTCCAGCCTTTGCAAG	2054	uc004bcy.1	UCSC_knowngene	+	109442079	109378338	noncoding
ASHG19A3A031416	36.6338	30.1398	29.3612	35.6038	28.1214	25.3728	28.5966	5.34797	5.13201	5.09746	4.97991	4.70449	4.52399	4.58484	P	P	M	P	P	P	P	chr6	RP3-340B19.3	TAAAAAAGTGATGTGAACCTTAAGATCACATATGTCATATGGGGGTGAAGGTGGGGGTGG	595	ENST00000450618	Ensembl	+	35513446	35512408	noncoding
ASHG19A3A029197	30.4639	15.7912	29.6366	19.4469	55.8458	57.5495	63.9376	5.08942	4.30977	5.11222	4.05753	5.73318	5.75047	5.80513	A	P	P	P	P	P	P	chr1	AL583842.1	CCACAGTGGGTTAGTGGATATTACAAAACCTCTGGTCCCACCTTATTAAGATGGAAAAAA	965	ENST00000445662	Ensembl	+	142559170	142553292	noncoding
ASHG19A3A032464	89.9462	83.1526	86.9979	416.523	418.465	419.073	419.757	6.60766	6.49474	6.60045	8.69869	8.75725	8.7316	8.64967	P	P	P	P	P	P	P	chr7	AC009473.1	GCTCCCACTTAGAGACTGCAATGTAAGGTATGGAAACAGAATATTCTCTATAGAAACATA	692	ENST00000451066	Ensembl	-	7990340	7989483	noncoding
ASHG19A3A015864	675.646	640.694	673.118	875.453	624.837	353.627	703.955	9.33195	9.25347	9.37702	9.84225	9.37936	8.47129	9.45029	P	P	P	P	P	P	P	chr2	AC104135.4	GGTAATAGCAAATGTTAACAGCCTGCTACCTCTGCACATCTTCCTTCCTTCATGATTTCC	1266	ENST00000453951	Ensembl	+	75169797	75167384	noncoding
ASHG19A3A049569	10.6568	11.3283	11.6908	31.3301	28.5621	23.6581	32.0323	3.60896	3.91849	3.83248	4.791	4.7291	4.42074	4.76119	A	A	A	P	P	P	P	chr13	DLEU2	TTCTCCTTTTCGCAATGTTGACGCAATCTATAAATAGTGGAACAAAAGGACCAACTTCCT	1267	ENST00000425586	Ensembl	-	50699856	50601268	noncoding
ASHG19A3A054911	167.917	161.886	153.781	150.338	325.151	379.937	393.838	7.46177	7.40576	7.37732	7.1396	8.38277	8.5816	8.54923	P	P	P	P	P	P	P	chr1	RP5-968D22.3	AGAACAAGTCCTCATCTCTCCAAAGACCCTTCATCCTTCATTTCACAATAGTCTTTATTG	519	ENST00000422253	Ensembl	-	168464882	168433451	noncoding
ASHG19A3A050372	20.5141	25.1513	22.5342	75.2514	17.9273	47.6316	35.124	4.52556	4.89506	4.72766	6.10973	4.02337	5.47184	4.90213	A	P	P	P	P	P	P	chr13	RP11-309H8.3	GTAACGGGATCAAACCCTTCTATTTACTTCTCCTTACTCATCCAAAGATGCAGTCAACCA	734	ENST00000446579	Ensembl	+	89932494	89925456	noncoding
ASHG19A3A042359	37.7432	22.8878	25.7801	81.0602	29.627	60.9749	38.7281	5.38716	4.77229	4.91577	6.2268	4.78174	5.83819	5.04797	A	P	P	P	P	P	P	chr10	RP11-298E9.6	TAATCGCTAAGTAAAAACCACTGAAGAACAGGACAGAAGCCAATGACCACCTCACCTCCA	390	ENST00000417149	Ensembl	-	3299402	3282562	noncoding
ASHG19A3A016105	495.276	399.151	489.513	360.877	547.293	350.593	597.135	8.91302	8.63005	8.93935	8.47983	9.17572	8.45881	9.19424	P	P	P	P	P	P	P	chr2	AC104655.3	ACAAGCTCTTAAACCCTCCGCCTTTTCCCCTATTGGTTAGAAAGTGAATCTTAAACTGTG	415	ENST00000438148	Ensembl	+	105761882	105760599	noncoding
ASHG19A3A018998	18.4519	21.7112	15.0643	13.5318	15.9403	23.127	24.7784	4.36994	4.70696	4.17849	3.47701	3.83717	4.38597	4.36753	A	P	A	P	P	P	A	chr21	C21orf93	ATCTCCAAGTAAATATTTTCACTGCTAAGCACAGGCAGCACTTCGAGGCTTCGTGACGAA	2323	ENST00000441947	Ensembl	-	46725172	46720159	noncoding
ASHG19A3A017535	22.9572	13.6059	25.4929	45.7708	25.4461	17.506	44.0423	4.69021	4.13253	4.89805	5.3606	4.54762	3.95158	5.24491	A	P	P	P	P	P	P	chr20	DEFB122	ATAAACTTGCCTTAAGTCTGATGTCAGTAGATTCCTGGGCTTTATTAAAACATCTTTGGC	496	uc002wvx.1	UCSC_knowngene	-	30016983	30009241	noncoding
ASHG19A3A037608	145.885	133.627	150.705	226.333	244.975	161.539	290.358	7.26549	7.14613	7.34802	7.76429	7.961	7.29531	8.09777	P	P	P	P	P	P	P	chr9	RP11-375O18.2	GCTTCCGTGCCCAACTTAGAACTACACATCTGCTGCCTCTTGGTAACATGTCATTATAAG	328	ENST00000424980	Ensembl	-	82147257	82120718	noncoding
ASHG19A3A031539	9.15478	9.70225	5.43034	16.6692	32.5228	32.0072	30.9949	3.40014	3.73851	2.87806	3.81898	4.92119	4.87476	4.70818	A	A	A	P	P	P	P	chr6	RP3-475N16.1	TTCCTAAAAGGCGAATAGGAAGCAGCTGTGGCTTATTGGAAGGAAAGAATGGCAGCAAGT	679	ENST00000450671	Ensembl	+	42911708	42908101	noncoding
ASHG19A3A034015	113.738	104.366	103.091	80.1188	114.847	115.714	117.216	6.92875	6.80935	6.82844	6.20761	6.80974	6.78709	6.71519	P	P	P	P	P	P	P	chr7	AC003986.7	TTACCTAACAATTTTCTTTTCCACATTTGCAAGGATGGCTCCCTTTTTACTTGTTGACAG	692	ENST00000417460	Ensembl	+	19161539	19159555	noncoding
ASHG19A3A000350	25.8284	28.2149	32.7998	29.3544	14.8223	20.1942	11.0546	4.86248	5.04727	5.24643	4.69139	3.72261	4.1777	3.0778	A	P	P	A	A	P	P	chr17	AC007639.1	TGCTTTGAACCAGGAAAGGACAAGAAAGAGgctggagtgcagtggcgtgatcatggctca	1747	ENST00000453722	Ensembl	-	70588943	70380442	noncoding
ASHG19A3A013764	31.6026	23.5663	21.4468	28.5071	31.9166	28.3818	39.5906	5.1382	4.81203	4.65965	4.64796	4.89179	4.69432	5.08029	A	P	P	P	P	P	P	chr2		CCAGGCTGGAACTATTACAAACAAATATTAATAACACTCCATTACTCTGGCTACATTTTC	2736	AK091143	RNAdb	-	66557390	66554654	noncoding
ASHG19A3A030412	41.5483	40.0184	30.1035	39.4219	36.0955	32.7314	45.3676	5.52025	5.5116	5.13182	5.13388	5.07688	4.90797	5.28771	P	P	P	P	P	P	P	chr6	RP1-249H1.4	GACACTTAAATGTAACTACAATGCAGTAATTCGAAGGTAAGAAAAAGTTGCCATGACTCT	413	ENST00000434296	Ensembl	-	114191899	114191161	noncoding
ASHG19A3A019066	18.6343	21.0651	21.3236	36.9016	21.4802	31.097	30.4021	4.38513	4.67144	4.65303	5.03238	4.30106	4.83069	4.6778	A	A	P	P	P	P	P	chr21	AF127577.12	ATATTCTTTCTAGGTGTTAGGAATGCTCCCAGGAGGTACAAAAGCTATCAGTCGCTGCAC	446	ENST00000449746	Ensembl	+	16440158	16439390	noncoding
ASHG19A3A039611	12.0364	22.9148	31.8471	343.277	279.831	283.622	282.572	3.76781	4.77421	5.20841	8.40406	8.16665	8.14877	8.05316	A	A	P	P	P	P	P	chrX	RP1-122K4.3	TCAGAAAAATCAGAAACTTTGGGGGACCTGAAACATCATCTCTCTGGACTTGTTGCAAAG	544	ENST00000391359	Ensembl	-	14006939	13998184	noncoding
ASHG19A3A054728	17.026	9.87857	8.82995	24.4444	16.5762	16.1625	22.8777	4.25028	3.75986	3.4486	4.40951	3.90171	3.82543	4.23874	A	A	A	P	P	P	P	chr1	RP4-782G3.1	AAGACATAGGAACATCGAGAAGAATGGAGTATGCTTATCTATGAAGACATGAGAACACAG	562	ENST00000414590	Ensembl	-	166877317	166864947	noncoding
ASHG19A3A018434	308.337	360.026	297.04	130.075	68.5533	112.941	89.5955	8.28017	8.4897	8.26962	6.91939	6.04242	6.749	6.30732	P	P	P	P	P	P	P	chr20	RP11-112L6.4	AATAAATATATGAAGAAATACAACCCCCTCGGGCAGTGCCTGGCACAGCATAAATGCCCA	573	ENST00000411453	Ensembl	+	48793096	48789126	noncoding
ASHG19A3A054977	165.779	164.099	155.859	304.35	290.448	186.46	308.307	7.44625	7.42543	7.39063	8.21605	8.2152	7.51012	8.18658	P	P	P	P	P	P	P	chr1	RP1-206D15.3	GTTTATAAAGCCCTAACTGTGCCGATGTTGACCGTTTTCTGAAACTCCTCCTCCAAAACC	1491	ENST00000445428	Ensembl	-	169429690	169411875	noncoding
ASHG19A3A026379	97.1117	70.218	85.3011	159.19	180.442	92.2286	206.277	6.71864	6.26648	6.57284	7.2272	7.49116	6.4492	7.57381	P	P	P	P	P	P	P	chr1	RP5-1070A16.1	TGCCTTTTCCTCTGCCAATGCTATGAGAATACCTTGGTTCACTAGAAGAAATGCTGACAG	2229	ENST00000418344	Ensembl	+	98738214	98676302	noncoding
ASHG19A3A024149	42.3918	19.3676	34.2836	22.1644	39.7989	30.0013	53.5538	5.54965	4.56628	5.30619	4.25875	5.22298	4.77907	5.54051	A	P	P	P	P	P	P	chr1	RP4-763G1.2	TTTTCTAAGGCACCAACTACTTCCTTCAAGCAGCAGCCAGAGATCTTTGCTTAATGGCTG	408	ENST00000230113	Ensembl	+	67998012	67995312	noncoding
ASHG19A3A031401	18.1471	6.61396	15.3092	283.868	272.513	294.25	304.995	4.34682	3.33266	4.20191	8.11232	8.12564	8.20711	8.17111	A	P	A	P	P	M	P	chr1	C1orf46	GAAGTTTGGATGTGATTGCTCTGAACAAGCTGCTTTGCCACAATAAATATTTTCAAGTTT	302	ENST00000444515	Ensembl	+	152629280	152627952	noncoding
ASHG19A3A020279	139.8	127.412	148.727	98.1271	137.557	146.244	149.86	7.2105	7.08189	7.33008	6.50573	7.08119	7.14239	7.08966	P	P	P	P	P	P	P	chr22	CR936633	GAGAGCTCTTAAACCAAAGGTCAGGACACACCCAGTGAATGTTTCCCTTCCAGATAAGAA	5051	uc003adi.2	UCSC_knowngene	+	27713416	27706611	noncoding
ASHG19A3A018086	22694.9	23160.1	22486.9	1498.12	3690.82	3367.93	3702.85	14.2236	14.2862	14.2895	10.6497	11.9941	11.8364	11.9062	P	P	P	P	P	P	P	chr20	RP4-726N1.2	GGTGTCTCATCGTCCCCACCCCACTGTAATTCAAAATAAAAACAATGCTAAACCACAAAA	400	ENST00000429853	Ensembl	+	18051652	18040136	noncoding
ASHG19A3A000194	70.1997	87.7467	88.5122	196.05	104.91	175.03	100.409	6.2666	6.57046	6.62242	7.54429	6.67169	7.41301	6.4729	P	P	P	P	P	P	P	chrX	RP11-265P11.2	TGCAGTGGACCCTGTTGCCTACCCGAGTGAAGATAAGAATACCTATTTTAAAGTTCTGTT	673	ENST00000429281	Ensembl	-	39186615	39164887	noncoding
ASHG19A3A015495	75.405	72.0988	77.8248	48.9785	119.334	117.97	141.275	6.36718	6.30194	6.44067	5.46196	6.86758	6.82033	7.00005	P	P	P	P	P	P	P	chr2	AL121656.4	AGTCCTTTTGGGGACTAGAATAATTTCTAGAGAGCCACCCTTTCTACATGATACGGCGCA	1794	ENST00000414054	Ensembl	+	33151760	33050509	noncoding
ASHG19A3A033875	26.051	33.1252	46.0106	93.2009	29.3119	67.8605	40.2301	4.87554	5.26158	5.71725	6.43354	4.76631	6.00137	5.10655	P	P	P	P	P	P	P	chr7	BC034268	TTCTTGTTTCCTTCTTCCAGAGGGTGTAGGAGTTGTGTTCCAAGTTTGTTCCTGCAAACC	2066	uc003sme.2	UCSC_knowngene	+	2487484	2477397	noncoding
ASHG19A3A029251	308.916	313.491	243.937	540.115	497.15	531.125	519.742	8.28328	8.2968	7.99137	9.10614	9.03259	9.09618	8.97823	P	P	P	P	P	P	P	chr1	CR936796	GGCAAAGGTTCAGACATACGACGTTTGTTTTTAAAATCTTTCTACAGCCTTGTATCCTTT	4096	uc001eiw.1	UCSC_knowngene	+	143257763	142618798	noncoding
ASHG19A3A018644	55.897	56.0677	55.9396	522.145	498.723	506.381	476.362	5.94114	5.96138	5.98358	9.05653	9.04042	9.03129	8.84103	P	P	P	P	P	P	P	chr21	AJ006998.2	TTGCTATAAAGAGTAGGCAAATGGAAATCTTTCCCCAAAGGGCACACTGGGATTGTTAGG	1000	ENST00000449602	Ensembl	-	16774624	16742840	noncoding
ASHG19A3A050080	18.5645	9.90771	11.6612	19.2911	28.1256	21.9511	26.8127	4.37908	3.76279	3.82807	4.04796	4.70476	4.30532	4.48278	A	P	A	P	P	P	P	chr13	RP11-518D7.1	AGAGACGAAATATATCTACAAAAGGGTCACTGCCCTTGCAAGGAAAATGCGATCCCAGCA	834	ENST00000455241	Ensembl	+	40763165	40755945	noncoding
ASHG19A3A038741	242.279	288.26	290.56	389.205	132.758	323.111	276.996	7.95491	8.17934	8.23986	8.5897	7.03045	8.34189	8.02417	P	P	P	P	P	M	P	chr9	RP11-561O23.7	TCACGCCTGACTAGAGCACTCTGCTTCACAGAGGGGCGTTCTGCGCGTTCTTCCTCCCTG	416	ENST00000419576	Ensembl	+	70923361	70922308	noncoding
ASHG19A3A017807	33.8949	31.3984	29.1957	91.9288	35.9271	83.7275	49.8749	5.24109	5.18907	5.0903	6.41355	5.06977	6.30337	5.42945	P	P	P	P	P	P	P	chr20	RP4-583K8.1	AAGCAATTGGTTCATCAATGGGTTGGTAAGAAGCCCTCCAAACCTTAATTATCTGAGTGC	431	ENST00000414598	Ensembl	-	51072158	51068002	noncoding
ASHG19A3A015678	390.403	477.104	410.544	458.846	196.901	354.484	209.207	8.60271	8.86454	8.7139	8.84976	7.6227	8.47621	7.59458	P	P	P	P	P	P	P	chr2	AC007250.4	TGAATGGGTCCCCTGTTTTTTCTCTTCTGCTCTTGTTGAACCATATCTCTGTTCCTTGTG	813	ENST00000454367	Ensembl	+	58523683	58503011	noncoding
ASHG19A3A015282	77.5354	867.075	75.0757	133.641	72.2375	56.5407	77.9007	6.40915	9.67194	6.38983	6.96155	6.11525	5.72797	6.10149	P	P	P	P	P	P	P	chr2	U91324.1	GTGCCCCGTGAAGCCCTTGAACAAAACCAGAAGAAAGTGAAAAATAAACAGCCTTATACG	447	ENST00000442864	Ensembl	+	8283399	8279531	noncoding
ASHG19A3A020169	427.514	386.894	465.105	1172.15	454.956	453.073	496.177	8.7286	8.58503	8.87093	10.2784	8.89304	8.85589	8.91302	P	P	P	P	P	P	P	chr22	LL22NC03-2H8.4	ATCGCTGTAAGCCTGAACCCCAACCCTGGCTGCAGCCACCTGCCCTCCTAGTGCGGCCGC	524	ENST00000412149	Ensembl	+	22649159	22648097	noncoding
ASHG19A3A030374	55.2244	65.0066	47.7764	95.0783	100.32	102.693	227.756	5.92416	6.16135	5.7673	6.46264	6.60409	6.61123	7.71975	P	P	P	P	P	P	P	chr1	BC062745	TTGTAAGAATGGCATAAAGCCGGTTTCTTGCGGTGGTTATATAATTTTCAGAATGTGTAC	1072	uc010pbe.1	UCSC_knowngene	+	149232553	149230715	noncoding
ASHG19A3A014162	125.684	49.8866	51.2441	120.811	37.0096	84.2571	62.9871	7.06663	5.80448	5.86298	6.81441	5.11369	6.31219	5.78227	P	P	P	M	P	P	P	chr2	AC006227.1	GTGTTTAAGAACATTTGCCTGTGCATGCATGTGTTTTCCTTTGCATCCCACAAGAGGAAG	860	ENST00000443123	Ensembl	-	107982329	107871146	noncoding
ASHG19A3A040745	673.629	181.248	201.899	503.706	116.58	416.142	173.499	9.32754	7.55879	7.74405	8.99977	6.83548	8.72082	7.30597	P	P	P	P	P	P	P	chrX	RP11-147O5.1	TTCTTTCATTCAAAGACAGGACTTACATGAGCCTTCCTTTCTGCTGTTCCTTTTCTTAAA	7619	ENST00000449605	Ensembl	+	21920026	21911717	noncoding
ASHG19A3A039320	1155.91	1223.11	1204.67	475.414	444.114	416.775	503.953	10.0517	10.1396	10.1651	8.9067	8.85496	8.7229	8.93527	P	P	P	P	P	P	P	chr9	RP11-65J3.1	TTCTTTCCCTGAGGACCATCTGGAGTGGACGCGTGCACTACCCCTCTCTGAATACACCCT	545	ENST00000423122	Ensembl	+	132121817	132104121	noncoding
ASHG19A3A018101	61.448	57.2746	65.3694	62.6761	65.4236	61.1218	77.5969	6.06777	5.99009	6.19551	5.83245	5.9721	5.8414	6.09454	P	P	P	P	P	P	P	chr20	RP1-122P22.2	TCGTCTTTGGGGCCACCGGTCGCCCCCGCCTCCGGGACCTGCGGGGAGGGCCCGCGAGAG	415	ENST00000412571	Ensembl	+	19789926	19738791	noncoding
ASHG19A3A043571	195.862	173.99	212.807	331.999	453.526	441.685	517.622	7.67446	7.50406	7.81336	8.35265	8.88726	8.81431	8.97115	P	P	P	P	P	P	P	chr10	RP11-554I8.1	TTACAAAAGGATTTGGATACCTCATCTCTCCTGTTTCGCCAAGGTCTTGACTCATCGCTG	499	ENST00000448835	Ensembl	+	6667308	6660677	noncoding
ASHG19A3A044674	249.962	243.969	220.635	682.362	690.75	564.652	764.098	7.99585	7.95897	7.85608	9.45478	9.53264	9.1901	9.56866	P	P	P	P	P	P	P	chr10	RP11-432J24.2	GGTTTTCTGTTTCTTTGATTATAAAATAACCCCTGTTGGTGGGGGGAAAAAATTAGCAAA	297	ENST00000428814	Ensembl	+	134234457	134232586	noncoding
ASHG19A3A017605	110.737	120.595	118.366	199.585	76.127	143.791	118.781	6.89327	7.0047	7.01672	7.56955	6.19807	7.11581	6.73779	P	P	P	P	P	P	P	chr1	HSPC157	TTCCTGGAGTCATTTGTGGGAGTTAGGGTCTTATCCTGATCTTTCCTCGTCCCCCGCTCC	1039	NR_023919	RefSeq_NR	+	22357713	22352041	noncoding
ASHG19A3A013238	57.1469	82.6448	67.9032	82.8563	48.3779	71.6568	78.7768	5.9707	6.48766	6.24921	6.25897	5.51578	6.08694	6.11794	P	P	P	P	P	P	P	chr2	AC017053.1	ATATGAAAAGGCTTTCCCAAAGAAGCCATGGAGTAGAATCCAGGTCTCCCAGTTCGTGAT	579	ENST00000425125	Ensembl	-	6465778	6453085	noncoding
ASHG19A3A000203	441.72	300.455	698.876	593.615	251.725	205.551	284.538	8.77436	8.23437	9.42456	9.24703	8.00604	7.6561	8.06638	P	P	P	P	P	P	P	chrX	NCRNA00182	CTGGACAAAGGAACAGGTATCTCAGATTCCCAGTTCTCAATCTTCCTTCCTCCTTACAAG	708	ENST00000430772	Ensembl	-	73513362	73467698	noncoding
ASHG19A3A037206	44.7095	38.3499	55.2908	59.6621	63.9227	44.8145	92.8263	5.62474	5.45573	5.96635	5.75799	5.94022	5.38213	6.35811	P	P	P	P	P	P	P	chr9	RP11-321L2.2	GGCATTAGAAATCCTGGCGTTTTGCTGATGTTCTGCTTCTTGATGTAGATGCTTATACTG	689	ENST00000446754	Ensembl	-	23898054	23894987	noncoding
ASHG19A3A008341	24.876	23.1672	21.9288	25.0396	42.2616	38.3476	58.0237	4.80561	4.79061	4.68976	4.44799	5.31376	5.14655	5.65946	A	P	P	P	P	P	P	chr1	RP1-35C21.2	AAGAAAGTGAAGATAACTGCAAGTCAGCTGGAAGTGCTGCCAAGATATGACCTCCAGGAA	546	ENST00000458070	Ensembl	-	177566844	177362814	noncoding
ASHG19A3A031267	145.183	115.022	143.683	124.388	191.85	200.75	216.322	7.25882	6.93964	7.28455	6.85953	7.58246	7.61913	7.64081	P	P	P	P	P	P	P	chr6	HCG22	GACTCATCTCTTCTTTGTACTTATACCTGACTCAGTGTTGCCCTCAGTCCAACTAGATCA	5670	NR_003948	RefSeq_NR	+	31027653	31021983	noncoding
ASHG19A3A019393	33.5425	20.8453	38.8318	23.989	52.5346	60.5867	61.8005	5.22681	4.65817	5.48309	4.3818	5.63793	5.82737	5.75173	A	P	P	P	P	P	P	chr1		GGCCCCAGACTACGTCCTTCAGATGCTGTAAAAGTGATAAAAATTATATTTATCTCGTGG	859	BC062773	misc_RNA	+	32321713	32320889	noncoding
ASHG19A3A019094	23.7009	20.4106	26.7321	21.5876	36.0891	47.1223	40.3388	4.7352	4.63395	4.9678	4.21729	5.07676	5.45625	5.11183	A	P	P	P	P	P	P	chr21	AF241725.4	AATAGCTAATACAAATAAGTGGTGCAGACCCCGGACACAGAGCTGATACACAGGATGTCA	609	ENST00000428205	Ensembl	+	22987758	22939083	noncoding
ASHG19A3A043602	45.8242	46.2445	41.0337	81.763	62.6555	70.1635	66.379	5.66209	5.70569	5.55774	6.23942	5.91139	6.05542	5.85935	P	P	P	P	P	P	P	chr10	RP1-251M9.2	TCTTCTTCAGGAATTGAACTGAATGTGCTGCCATCCTAGGCAAAAACTCCCAACTGACTG	537	ENST00000420825	Ensembl	+	11012779	11002113	noncoding
ASHG19A3A044610	112.592	117.511	119.327	281.554	134.364	238.504	112.522	6.91678	6.96878	7.0285	8.09765	7.04616	7.88267	6.65016	P	P	P	P	P	P	P	chr10	RP11-282I1.1	ATGCTTGAAAATAAATGGCACCTGTGGAGAAAGTGCCCCATCCCTGATTATGTCATCGGA	831	ENST00000448347	Ensembl	+	125277224	125115965	noncoding
ASHG19A3A016313	393.512	384.11	381.137	49.1204	41.5349	50.4247	48.3517	8.61148	8.57526	8.61778	5.46639	5.28876	5.55499	5.38339	P	P	P	P	P	P	P	chr2	AC068282.3	TACCAATCAAGGACCTTTGACTCCAAAAATTACCTTTTTTGTACAAGTGACTACCTGGTG	2690	ENST00000433673	Ensembl	+	128158156	128146705	noncoding
ASHG19A3A049922	8.42222	5.10074	5	21.9389	17.4492	15.1351	24.1997	3.27946	2.32604	2.39437	4.24297	3.98145	3.71781	4.32791	A	A	A	P	P	P	P	chr13	RP11-101P17.10	TGGCTTCTGACGTTTCAGTACAATCTTCTATTGTGCATCTGGATGACATCACTGTTGTGT	405	ENST00000443719	Ensembl	+	21809343	21808706	noncoding
ASHG19A3A022187	42.5994	36.3045	39.2631	29.4513	48.0587	44.6743	73.0222	5.55789	5.38319	5.49743	4.69694	5.50673	5.37805	5.99932	P	P	P	P	P	P	P	chr1	RP11-8J9.6	TCTGCAAGTTTACCAAGCATTGCCACAGTGCTCTTCAGTTTATACTCCTCATAGAAATAG	488	ENST00000413093	Ensembl	+	47233300	47223946	noncoding
ASHG19A3A009744	45.7365	69.3097	64.3729	165.316	31.9467	114.055	62.2241	5.66007	6.24806	6.17501	7.28722	4.89361	6.76393	5.76312	P	M	P	P	P	M	P	chr17	AC102948.2	CATGACATATATTTGTATTTATGGTCCTCTGGAGAATCTTGCCTTTTCCCACCAATTTTT	682	ENST00000412360	Ensembl	+	50976948	50939480	noncoding
ASHG19A3A035619	111.244	94.5438	104.118	80.8712	71.7036	71.5238	92.8879	6.89919	6.67887	6.84172	6.22315	6.10574	6.0835	6.35912	P	P	P	P	P	P	P	chr1	RP11-34P13.14	TTGACCACTGTGAAGACTGGTGTGGGAAGGGTCGTTTTGGATGCACTTGAGCAGGGGTCC	323	ENST00000493797	Ensembl	-	140339	139789	noncoding
ASHG19A3A042404	89.2875	31.5189	37.0553	59.5906	66.4789	45.6168	87.3264	6.5979	5.19352	5.41675	5.75588	5.99742	5.40716	6.2687	P	P	P	P	P	P	P	chr10	RP11-414H17.6	TGTGAATTCAGACCCCCACTTCGCTTGAGCAGTGACGGGAAGCTGGTGACTTCAGGCTCT	409	ENST00000435526	Ensembl	-	6179520	6168004	noncoding
ASHG19A3A043406	18.3679	17.7563	17.4572	52.6578	39.0573	29.1729	49.9736	4.36298	4.45862	4.3744	5.57405	5.19609	4.7354	5.43355	A	P	A	P	P	P	P	chr10	RP11-298J20.1	AGTATTTAAAATGACACAGGGCTGGAGCAGTAGGAACCACTGCTGTAATCCTAGCACCTT	430	ENST00000446713	Ensembl	-	126619962	126617451	noncoding
ASHG19A3A051632	143.904	140.145	149.588	143.531	143.868	144.975	154.79	7.24694	7.21359	7.33884	7.06965	7.15005	7.12808	7.14002	P	P	P	P	P	P	P	chr1	RP11-353N4.1	ATCTGACAGTATGACAAATGGTCCCATGTGCGATATTCACACTGCATTGCAGTCAAACCT	398	ENST00000428508	Ensembl	-	149591762	149590751	noncoding
ASHG19A3A013471	67.1411	52.5139	67.7335	57.0402	106.285	95.2983	120.545	6.20065	5.874	6.24588	5.68679	6.69346	6.4988	6.75949	P	P	P	P	P	P	P	chr2	AL133249.1	AGCTGCTTACCCCTCACTGGGTTGTGGCATGAACAATAAATACACTTTTAAGATACTGAA	418	ENST00000416279	Ensembl	-	32029049	32018891	noncoding
ASHG19A3A038774	38.8378	26.5119	26.1053	92.4687	91.2506	98.3683	100.383	5.42863	4.96561	4.93561	6.42212	6.46224	6.54678	6.47224	P	P	P	P	P	P	P	chr9	AK095210	CAGGGGAAGTGTGACTGTAGCTTTAAATAGTTTAAATAGTCCTTCAAATACGGCAAATAA	2078	uc004aiu.1	UCSC_knowngene	+	74958126	74920351	noncoding
ASHG19A3A025674	18.0161	14.2694	14.9576	13.1247	30.8914	29.5817	28.5529	4.33717	4.18918	4.16848	3.43139	4.84607	4.75691	4.58317	A	P	A	P	P	P	A	chr4	AC112518.3	AAGTTGGAAATGGCTCCTCTCAAACACTGGAGATAGAGCAGCCCAAATGTATCTGCTACT	575	ENST00000436089	Ensembl	+	74580244	74576018	noncoding
ASHG19A3A000271	49.3508	53.1355	49.6711	37.5356	22.1093	19.7971	21.3865	5.76777	5.88788	5.82133	5.05884	4.33983	4.14507	4.13309	P	P	P	P	P	P	P	chr2	AC104654.1	AAGAACCACCGCAAAGAGAGATGGCAACAAAGTCTGAGGCCCAGGGTCACCACAAACCCG	741	ENST00000442214	Ensembl	+	42120186	42104695	noncoding
ASHG19A3A026104	32.7606	23.3036	34.2917	29.5478	27.7799	34.0924	41.8058	5.1899	4.79667	5.30641	4.70147	4.68426	4.96991	5.16759	A	P	P	P	P	P	P	chr1	RP11-78O9.1	CTTGGGACCCTATGTGTACACCAGCATTTTCCTGAGTTCTCTAATTGTTTGTAGTTTGTC	352	ENST00000439455	Ensembl	+	94611175	94610666	noncoding
ASHG19A3A049576	31.6891	27.6298	36.1802	30.8814	53.7158	27.3657	58.2311	5.14337	5.02069	5.3842	4.76727	5.67239	4.63784	5.66384	P	P	P	P	P	P	P	chr13	RP11-547C18.3	ATATCGCTGCCCACACTGTGCATACTGTAGACGGCCAGTTTCGAAGGAGCACCGAGCACA	431	ENST00000433280	Ensembl	-	51685078	51659559	noncoding
ASHG19A3A040892	50.6318	58.1802	55.9637	52.4343	68.0165	52.0651	71.6916	5.80058	6.01132	5.98492	5.56802	6.0321	5.60298	5.97246	P	P	P	P	P	P	P	chrX	RP11-245M24.1	TCCATGCCATGTGTGCCAATGGTAACCAAACCTTTCATCCTGACCATCACTAACTGGATT	639	ENST00000422047	Ensembl	+	45489447	45369728	noncoding
ASHG19A3A017040	19.9265	14.6126	21.752	22.3905	18.8554	23.6476	18.5858	4.48208	4.21868	4.6795	4.27361	4.11028	4.4196	3.90986	A	P	P	P	P	P	P	chr2	AC013448.1	CAAAATCAGAGAGAATCAAAGTTCATTTTGCAAATTGGCTGGGACCCTCATAGCCTTAAA	808	ENST00000422118	Ensembl	+	224369329	224363490	noncoding
ASHG19A3A015599	356.15	328.83	385.067	252.075	451.769	442.751	480.958	8.47957	8.36386	8.63049	7.92952	8.87978	8.81839	8.85721	P	P	P	P	P	P	P	chr2	AC009236.2	ACTGGAAGCTGTTTTATCACTTTGTATTTTGAGAACCGCTCCCTTTCCCGCACACGCATT	553	ENST00000442821	Ensembl	+	45396553	45395721	noncoding
ASHG19A3A008339	42.4172	50.6109	38.3595	72.0996	44.0285	56.337	46.6187	5.55056	5.82482	5.46608	6.04337	5.37343	5.72246	5.32981	P	P	P	P	P	P	P	chr17	AC019349.2	AACAATTACAGACACCTCCCACGAGCAGGAAAGCTCTGGAAATGTCTTCTTGGAAAGCAA	2141	ENST00000456403	Ensembl	-	39710747	39705857	noncoding
ASHG19A3A013677	38.9358	37.1951	54.525	66.7915	71.9795	66.4188	78.6577	5.43211	5.41603	5.94864	5.92584	6.1115	5.9721	6.11532	P	P	P	P	P	P	P	chr2	AC007381.3	GATGGGGTGGGGGTGAGATTTTTGTCCTTTGTACCTTTTAATTACAAAATTATTTTGAAC	2005	ENST00000457668	Ensembl	-	60580151	60577729	noncoding
ASHG19A3A013193	63.1083	43.2269	53.2184	101.085	73.9998	42.6385	92.2428	6.10858	5.61435	5.91405	6.54792	6.15325	5.30633	6.34896	P	P	P	P	P	P	P	chr2	AC113607.2	AGTGCACCTTCCTCTCTTATTTTGTTTTATTTCCAGGGAAAGGGAAAGGAAGACATGCAG	694	ENST00000445279	Ensembl	-	901137	895901	noncoding
ASHG19A3A023564	18.8238	16.1615	14.3222	20.9109	23.3391	23.9875	33.8072	4.40115	4.33937	4.10359	4.17038	4.42004	4.44378	4.84058	A	P	A	P	P	P	P	chr1	RP11-5P4.2	TATTTCACATTCACTGACCTTTTGTGTAATTTGATATGCTCCTTCAGGAAGTCAGCCATG	359	ENST00000418091	Ensembl	+	63491329	63489877	noncoding
ASHG19A3A054913	47.1446	49.2704	48.1553	65.3467	76.2768	53.9242	94.3428	5.70082	5.78675	5.78008	5.89339	6.20043	5.65845	6.38079	P	P	P	M	M	M	M	chr16	C16orf81	GCTTGCCTTTGACTTCGTTTGTTCTATCGAAGCATGTGCAGAATTGTTAAATTTTAATGT	2243	NR_024347	RefSeq_NR	+	89230083	89225627	noncoding
ASHG19A3A020248	22.1983	17.7365	11.4207	21.8598	21.559	15.7282	24.2685	4.63554	4.45727	3.79957	4.2374	4.30601	3.7801	4.33509	A	P	A	P	P	P	P	chr22	CTA-221G9.7	ATTCTCCTCGTGGGAGCAAGAAGATGAAGTGGAGAGGAAGGTTTGAGTCCTTTCTCTCTA	482	ENST00000454253	Ensembl	+	25609652	25608708	noncoding
ASHG19A3A010012	90.6097	58.5719	81.1172	80.4722	140.121	159.535	153.757	6.61741	6.01848	6.50194	6.21438	7.11316	7.27689	7.1303	P	P	P	P	P	P	P	chr17	AC061992.2	TCTTGCTGCAGCTGGGCCAGTTTGCTGACCTTCTCAGCTCCTTCTCTTAGACTGGAGAGG	799	ENST00000439041	Ensembl	+	76343879	76311809	noncoding
ASHG19A3A020583	753.359	826.119	753.227	1024.7	1177.83	964.342	1223.55	9.46954	9.60739	9.5266	10.0743	10.3265	9.99923	10.2904	P	P	P	P	P	P	P	chr22	RP3-439F8.1	AAATTTGCTCGCCTGCACACCCAGAGAAATGGACTTGGCTTGGTTTTTCTGAACTTTTGC	2949	ENST00000426112	Ensembl	+	46944093	46937391	noncoding
ASHG19A3A013611	428.511	360.481	322.703	81.1109	29.5805	70.8614	38.178	8.73198	8.49252	8.37936	6.2274	4.77907	6.06872	5.02662	P	P	P	P	P	P	P	chr2	AC079807.4	ACTGGTTGAAGGAAATCCATGTTGGGCTTCTGTGGATGCTGGATTCTTTCCTTCTGAGAA	1808	ENST00000447571	Ensembl	-	48468122	48168834	noncoding
ASHG19A3A043022	894.269	821.106	829.348	2117.23	1575.22	2003.68	2149.31	9.70039	9.59646	9.66315	11.1507	10.7488	11.0708	11.1108	P	P	P	P	P	P	P	chr10	CR592318	TTACTTCCATGGGATATAGTCTCCATAAGAGAGTAGTCATCATTGTATTTGTTGATGCTT	1146	uc001kat.2	UCSC_knowngene	-	81586183	81451255	noncoding
ASHG19A3A041491	64.1993	50.4366	63.9783	48.6177	24.8703	33.2483	33.5314	6.13225	5.82073	6.16704	5.44891	4.5138	4.92777	4.82753	P	P	P	P	P	P	P	chr1	RP11-552D4.1	CCTTCCCTGAGAGAAGTGTATTTAATCTTAAATTCAGATGTTTGTTTGTCTACCCACTTA	654	ENST00000445339	Ensembl	+	230142909	230138476	noncoding
ASHG19A3A015637	32.5159	26.4039	28.265	30.0708	53.7459	30.8961	58.2206	5.18002	4.95965	5.04402	4.72727	5.67346	4.82304	5.66345	P	P	P	P	P	P	P	chr2		AAAGAAATACTGGGTGCAGTGGGGTGCTTAAACATCAACATGGGCTTTTAAATGTGGGCC	4850	BC042523	misc_RNA	+	48344953	48340113	noncoding
ASHG19A3A043842	303.294	251.66	314.088	195.35	451.876	500.259	514.559	8.25709	7.99844	8.34382	7.5394	8.88045	9.01266	8.96217	P	P	P	P	P	P	P	chr10	RP11-124O11.1	TGTTGTGGATCTTTTCCCCCTTTTACCTTGGCTTCCAGGAAGCTCAGTGCCAAGTTTTAT	1714	ENST00000421320	Ensembl	+	43369508	43366968	noncoding
ASHG19A3A029461	24.7692	44.7028	58.6627	144.495	74.5191	124.803	66.039	4.79906	5.65907	6.05034	7.0796	6.16444	6.90508	5.85182	P	P	P	P	P	P	P	chr6	RP3-471C18.2	GAATATCCTCTAAAAGGCAGCTAAGCACTCGCTGTCTTCTTCCTTTTGCCTCATCAAGCA	191	ENST00000450310	Ensembl	-	19753344	19690055	noncoding
ASHG19A3A055227	54.4557	40.5489	31.3246	25.7705	29.9656	19.6668	19.37	5.90622	5.52715	5.18413	4.49398	4.7983	4.13648	3.97391	P	P	P	P	P	P	P	chr6	CR598940	AAGGCAGGAGGGCAGAAGGGCAGAGGTGCAAGCAGGGGCCACCTCCTGGATGAGTTTAGA	1339	uc003pvl.1	UCSC_knowngene	-	112230600	112221561	noncoding
ASHG19A3A017869	48.0786	52.8723	46.1413	138.951	103.912	86.3173	134.661	5.72845	5.88259	5.72092	7.01851	6.65947	6.35056	6.92375	P	P	P	P	P	P	P	chr20	RP5-827L5.2	TGCTTATGTTCCATTGGCCTGAACAAGCTACTTATCCAAGCCCTACTTCAGTGAGATGAG	500	ENST00000420710	Ensembl	-	59652872	59652279	noncoding
ASHG19A3A034688	24.1947	27.4246	21.045	30.0204	26.3143	29.0445	28.4083	4.76652	5.01084	4.63658	4.72546	4.59846	4.73073	4.57384	A	P	P	P	P	P	P	chr7	AC002064.5	ATGATGCCTACCCGATCCTGCCGGCTGAGAGAAGGATGGTATATTTTCTTACATTAGTCA	733	ENST00000445784	Ensembl	+	89951906	89941809	noncoding
ASHG19A3A049634	252.774	282.582	229.672	88.1132	131.404	94.1362	115.624	8.00853	8.15399	7.90733	6.35076	7.0133	6.48066	6.695	P	P	P	P	P	P	P	chr13	AK127969	TCGTGGGGGTGCCTCCCCCCCTGGGATGGGGGTCCCAAGAGCCAGGGGGGGAAGAGGGGC	3223	uc010aeh.1	UCSC_knowngene	-	64418258	64402979	noncoding
ASHG19A3A044239	110.165	97.5213	103.917	71.9437	66.764	61.0123	82.9624	6.88553	6.72022	6.83901	6.03991	6.00408	5.83947	6.19322	P	P	P	P	P	P	P	chr10	LOC439994	TGCCATTCGTGGGACCGAGTTTCAGGCAGCTGGAATAAAGAGAGACATCGGGGGAAAGCC	1179	NR_029408	RefSeq_NR	+	89103330	89102167	noncoding
ASHG19A3A046574	258.165	247.477	251.394	49.3703	75.6067	85.8994	90.8228	8.03806	7.97628	8.03145	5.47709	6.1875	6.34159	6.32554	P	P	P	P	P	P	P	chr1	RP11-776H12.1	ACCAAGTTTAGCCTGCCTTTGCTATTTTGGCGTATCTCCAATTCTTCATGATTTTCTCAT	1796	ENST00000439156	Ensembl	-	61106163	61005920	noncoding
ASHG19A3A019202	326.179	202.338	335.164	201.925	562.615	521.902	629.524	8.36009	7.71031	8.43709	7.58698	9.21373	9.07076	9.27274	P	P	P	P	P	P	P	chr21	NCRNA00160	ACTTAAGCAAATCCTTAGTAAAGGAAAGAACCCAGCAGCCTCTCCTCAAACCAGTAGGCA	694	NR_024351	RefSeq_NR	+	36109479	36096104	noncoding
ASHG19A3A000239	70.2657	54.0209	68.2639	136.114	96.2469	129.046	105.244	6.2678	5.90802	6.25634	6.98838	6.54689	6.95236	6.54852	P	P	P	P	P	P	P	chr22	XXbac-B33L19.3	GTGGCCCCTCTGAGGCATGAATCTAGAGCCATTGACACTGGAGAATGATACCTACCCTGA	1069	ENST00000436162	Ensembl	+	20350461	20325665	noncoding
ASHG19A3A040308	12.8978	6.07789	12.2768	21.7786	24.3105	15.5637	27.3116	3.87064	3.21627	3.89217	4.23018	4.48027	3.76057	4.51015	A	A	A	P	P	P	P	chrX	RP11-232D9.3	AATATTTTCTAGTTAGCGAGGGTTTGAGAGGTGCGTCAGGTCTCCAGAAATTCACCTCAA	512	ENST00000446495	Ensembl	-	115828156	115826877	noncoding
ASHG19A3A033984	91.2917	70.2386	88.6824	81.3826	109.976	143.786	159.78	6.62784	6.26745	6.62437	6.23317	6.74439	7.11568	7.18211	P	P	P	P	P	P	P	chr7	AC011288.2	ACTTTGAGATTTTATGGATATGAAACCTGCTATCATTTAGCATCCTGCCTCTGGGAATAG	526	ENST00000411542	Ensembl	+	13743774	13141096	noncoding
ASHG19A3A018811	37.9465	7.1541	33.4245	55.3675	42.8872	33.1343	39.4673	5.39415	3.41761	5.27172	5.64354	5.3331	4.9244	5.07623	A	P	P	P	P	P	P	chr21	AP000302.58	CAAACCTGAAAATGGTCCTGAAGTCACAATGTCTCCAGAATCTAGGAGTGCCTCTCTGAA	666	ENST00000450928	Ensembl	-	34856565	34854805	noncoding
ASHG19A3A025152	287.626	249.586	280.63	570.982	485.972	287.132	606.55	8.17934	7.98878	8.18985	9.18796	8.99681	8.16906	9.21438	P	P	P	P	P	P	P	chr4	AX747945	TCCTCTTCTTCTGCCCCTTCAACTGCAGGCTGGAAAATTCATATGTTACCAGGAAAACAG	2165	uc003gcl.1	UCSC_knowngene	+	1147489	1145159	noncoding
ASHG19A3A018638	585.019	634.885	556.091	594.431	511.097	529.254	626.89	9.13164	9.24472	9.10813	9.24922	9.08053	9.09081	9.26757	P	P	P	P	P	P	P	chr21	AF127936.3	TCTCCTTCCCTCTTGAAGGAGAAGCCTTGAGTTGTGCATCTTCTCTTGATTTTACTGAGG	743	ENST00000455253	Ensembl	-	16126186	16120065	noncoding
ASHG19A3A019186	830.708	791.617	778.912	615.848	528.278	568.53	538.439	9.60013	9.54268	9.57366	9.29822	9.12896	9.2021	9.03689	P	P	P	P	P	P	P	chr21	CR626360	TCTGTCACCTCTTTCTAAAAGCTGGGAAATGGTTATTGTCAACGCCAGCCCCATTTTGGA	2657	uc002ytn.2	UCSC_knowngene	+	35343487	35303425	noncoding
ASHG19A3A048964	74.0251	74.3118	65.8845	83.7455	71.3102	61.4397	90.1937	6.34315	6.34271	6.20561	6.27499	6.09727	5.84985	6.31664	P	P	P	P	P	P	P	chr1	RP11-347K2.2	AAACCCAACCTGAATGTCCCCTAAAAGTGAAGAAATGTCCACACTTCTATGTGCAGATTG	439	ENST00000455771	Ensembl	-	103835986	103820968	noncoding
ASHG19A3A013452	88.2526	100.174	89.4232	159.503	159.147	172.922	166.839	6.58199	6.7558	6.63493	7.22984	7.30496	7.39652	7.24599	P	P	P	P	P	P	P	chr2	AC097724.3	AAGGAACTCTGAGCAGCTAAACTCTGACTAATCCCAGGGTATACCTGCGTTTTCTCTTCA	726	ENST00000452212	Ensembl	-	28959071	28931818	noncoding
ASHG19A3A016260	348.235	335.873	313.443	505.818	428.804	407.895	465.882	8.45118	8.39165	8.34171	9.00727	8.79525	8.69086	8.80878	P	P	P	P	P	P	P	chr2	AC009404.2	TCCTCTGATCCTTCCAGGTGGATTAAGCCCTTTCTAATCTGTCATGGACAGAGCAATGTA	3090	ENST00000420330	Ensembl	+	118599234	118591512	noncoding
ASHG19A3A051692	170.569	141.85	159.016	113.839	236.538	269.303	268.433	7.48336	7.22925	7.41685	6.72012	7.90369	8.06955	7.97475	P	P	P	P	P	P	P	chr14	BC036259	ATTTTTGAGAAAACTGCCTCCTCTTTAGGACTTGGCATCCCCTAACCTGCATCAGGAAAG	1375	uc001xyn.2	UCSC_knowngene	+	90925248	90921672	noncoding
ASHG19A3A043069	15.8421	5.16425	11.6027	15.5252	26.5547	19.5428	25.9931	4.14942	2.32859	3.82125	3.70789	4.6134	4.12641	4.43684	A	A	A	P	P	P	P	chr10	RP11-57C13.4	CTGTGTGCTTTGGGTCAGGCACCAAGGTCCAGACCAGCCAATAGTGAACAGGAAATCAAG	168	ENST00000446794	Ensembl	-	89365781	89351363	noncoding
ASHG19A3A050792	17.9022	5.60196	13.1377	13.1611	18.8739	21.3606	23.5478	4.32835	2.71466	3.9816	3.43755	4.11184	4.2629	4.28436	A	P	A	P	P	P	A	chr14	AL163953.2	TTGAGGTAAAACTGAGAGACAGTGTTTGCAGTGAACCATGCAGTAACCTTCATCTTGCCC	726	ENST00000436530	Ensembl	-	54080744	54066549	noncoding
ASHG19A3A017323	42.1747	42.2259	42.7422	34.725	60.5673	54.1821	65.641	5.54278	5.58497	5.61638	4.94424	5.85935	5.66558	5.84263	P	P	P	P	P	P	P	chr20	RP5-1022P6.4	AGTCACAGCAACTCTCCAAATCATGACGCTCAAAATGCCACATCTAAAAAGAACATCCGG	358	ENST00000450640	Ensembl	-	5490648	5488520	noncoding
ASHG19A3A014319	161.428	134.75	185.586	102.477	207.836	208.118	215.501	7.41059	7.15676	7.63186	6.56948	7.70423	7.67551	7.63644	P	P	P	P	P	P	P	chr2	LOC151121	AACTTTCCTACTCAGTGGTGCCTTATTGAAATGGAGCATATTCCTGCCACCCATAGGTTG	2213	uc002tpv.1	UCSC_knowngene	-	130031421	129999745	noncoding
ASHG19A3A015568	135.524	139.379	131.911	92.157	144.227	162.233	191.054	7.16991	7.20506	7.16763	6.41718	7.15351	7.30148	7.45401	P	P	P	P	P	P	P	chr2	DKFZp781C08198	AGTGGTGTTCCCCTTTTTTGCATGTATCAGGTATAATTAATCAGGTTGACATCACATATG	1809	uc002rse.2	UCSC_knowngene	+	42121185	42104694	noncoding
ASHG19A3A036878	140.345	98.8508	131.877	623.129	151.669	195.114	68.2432	7.21604	6.73779	7.16712	9.31782	7.22977	7.57796	5.90262	P	P	P	P	P	P	P	chr1	RP11-161I10.1	GGTCACCTTGCTTTCTTTGCTCTTGATTGTTTTCTAGCCCTACTTCTGTGACTACATTAA	506	ENST00000417409	Ensembl	+	190463427	190449508	noncoding
ASHG19A3A050818	202.694	213.142	194.982	332.175	299.476	300.381	334.518	7.71956	7.77905	7.69866	8.35399	8.25973	8.23879	8.30552	P	P	P	P	P	P	P	chr1	BX571672.2	CGTAAGAATTCCTACTTCAAACCTCAGACTTCAAATAACTGCCAGAACTACTTGACTGAG	697	ENST00000422129	Ensembl	-	143194342	143118703	noncoding
ASHG19A3A047523	82.2309	49.2543	71.4832	48.7355	69.0742	41.8147	69.0515	6.48855	5.7865	6.32081	5.45407	6.05459	5.27666	5.92056	P	P	P	P	P	P	P	chr1	BC036594	TAAGTTCCACAGCTTCACCCTTGTCGGTGTGATATGGGCGTGAAAGAAGACATAAAACAG	3162	uc001diz.3	UCSC_knowngene	-	84326679	84041473	noncoding
ASHG19A3A019083	21.5844	18.8717	21.5898	15.0441	22.9866	29.8262	40.1116	4.59368	4.53376	4.66729	3.65607	4.39808	4.77051	5.10248	A	P	P	P	P	P	P	chr21	AP000431.1	GCAGGTTTCATGCAGGAAACAAGTCTCCTGTTTTATGCTGGATCTCAGTACTCAACATAG	790	ENST00000450653	Ensembl	+	20420003	20418628	noncoding
ASHG19A3A013207	49.2426	39.5628	45.4969	76.0225	72.8864	58.6619	79.5331	5.76411	5.49496	5.70244	6.12579	6.1291	5.77941	6.13408	P	P	P	P	P	P	P	chr2	AC018685.2	AATGAAGAGATGAGAAGCTGGAGCTTCTTATGTGAAAAATAACCCTCCAGCCATGGCTGC	368	ENST00000457813	Ensembl	-	2734729	2733679	noncoding
ASHG19A3A042921	63.2414	38.7739	42.4292	116.968	111.526	101.309	152.493	6.11055	5.46985	5.60392	6.7591	6.76666	6.58886	7.11729	P	P	P	P	P	P	P	chr10		ACCTCAAAACTGTTTCGGATGCTAGAAATCCATGGCTTAGAAGTTCCAGCCCTCCATGAA	1974	AK055023	misc_RNA	-	72695453	72689681	noncoding
ASHG19A3A013308	15.1449	9.01508	18.5362	11.7268	26.0859	22.6856	21.0403	4.0908	3.6584	4.46084	3.2574	4.58457	4.35705	4.10465	A	A	P	P	P	P	A	chr2	AC113608.1	TTGAGGTGGAGCATGAGCTGCCCCTGAGCAGACAGAACAACACAAAGGGGCTGGGAATTG	487	ENST00000448379	Ensembl	-	15951001	15941870	noncoding
ASHG19A3A013259	324.834	318.168	357.179	356.296	567.003	740.602	675.549	8.35439	8.31856	8.52506	8.46189	9.22408	9.60487	9.38428	P	P	P	P	P	P	P	chr2	AC007464.1	TTTAAAATATCCTTCTTTGAAGTCCATCCTGCTCTGCCCACTATTTGTCCCCGGTGGTCA	746	ENST00000456681	Ensembl	-	8418214	8064284	noncoding
ASHG19A3A014831	572.422	510.615	539.572	328.354	504.273	555.667	568.799	9.10154	8.95098	9.06485	8.33334	9.05961	9.1683	9.12742	P	P	P	P	P	P	P	chr1		TTGTACACTAATTTTGAGGACCTGGAGCTGGTTTTGAGGACCCTCCCTAGCAAGTACTTA	2021	AK055120	RNAdb	+	4009925	4007904	noncoding
ASHG19A3A030126	1628.07	1478.59	1363.48	1192.11	617.807	1293.22	660.225	10.5256	10.3916	10.3412	10.3053	9.35865	10.4417	9.3472	P	P	P	P	P	P	P	chr6	C6orf155	ACTCCACCCCATCCCCTTATTGAACAATTACGATGCCTATAAATATTGTATTGAGAAAGA	662	ENST00000413945	Ensembl	-	72129806	72054046	noncoding
ASHG19A3A050471	11.5818	9.60435	15.8615	16.8367	26.2612	26.2774	33.3736	3.71622	3.72817	4.25067	3.83425	4.59556	4.57717	4.82041	A	A	A	P	P	P	P	chr13	RP11-460H14.1	AATCCTTCTCGCTCTTCATACACTGAGACAGGTTGAAATCTAAGACCATGGCAGGGAGAA	414	ENST00000439008	Ensembl	+	110053988	110053042	noncoding
ASHG19A3A018649	107.81	101.11	119.947	157.308	235.229	270.908	260.732	6.85831	6.76866	7.03577	7.21001	7.89439	8.07997	7.93047	P	P	P	P	P	P	P	chr1	RP1-159A19.4	TCTGTGTGTCTGTCTACCTGGCAAGGAGATATGGCCCCCATCAGACTGGAGCTCCACAGA	283	ENST00000443579	Ensembl	+	27857072	27852315	noncoding
ASHG19A3A038739	184.872	170.332	178.607	271.11	234.419	339.281	374.496	7.59269	7.47419	7.58114	8.03949	7.88839	8.40772	8.47464	P	P	P	P	P	P	P	chr9	RP11-561O23.8	TTAATAACAAGAAATTAATGGTGAAGTGGTGACGAAAATTCTACATTGCTTAGAAAGCAA	340	ENST00000425587	Ensembl	+	70844228	70843566	noncoding
ASHG19A3A038493	56.0097	58.2852	61.4738	123.139	115.571	102.466	133.761	5.94462	6.01301	6.11691	6.84448	6.82045	6.60636	6.91447	P	P	P	P	P	P	P	chr9	RP11-384P7.5	GGGTAGCGATTATCTGAATAATATGTGCTTCCTGTCTGTAGTGAGGTGTGAACATGGTGG	1144	ENST00000449144	Ensembl	+	33722553	33719687	noncoding
ASHG19A3A040232	27.1141	13.7564	19.9282	33.8204	26.2162	33.4927	31.9488	4.92951	4.14643	4.56342	4.90154	4.5926	4.93906	4.7559	A	P	P	P	P	P	P	chrX	LL0XNC01-116E7.2	AACATAATGGAAGAGGCAGGAGGTATTCCCACCTACAACTCAGGATTCCTATGTCCTATG	1229	ENST00000447281	Ensembl	-	103174131	103172004	noncoding
ASHG19A3A019687	16.6202	16.7416	29.301	32.6886	21.0421	24.7215	39.2984	4.21698	4.38611	5.09553	4.85253	4.27253	4.48698	5.06815	A	A	P	P	P	P	P	chr22		TATTTGGCTTGAGGACTCTGACTTCACTATAAAGGGCTGTGCTGAATCTGGGTAGAACAA	1944	AK025129	misc_RNA	-	31372067	31368886	noncoding
ASHG19A3A010958	185.162	168.568	166.677	101.048	147.38	136.149	176.387	7.59583	7.45868	7.48004	6.54723	7.18772	7.03221	7.33086	P	P	P	P	P	P	P	chr1		TTCTCCAACCCCACCCATCGTTTTGAGGGTTAGCATTTGGAGAGGCCGTGATTTAAAAAA	2617	AK096113	misc_RNA	-	214159762	214157145	noncoding
ASHG19A3A038311	116.551	127.263	118.082	926.758	877.649	959.199	997.184	6.9627	7.07983	7.01281	9.93052	9.88702	9.98979	9.97951	P	P	P	P	P	P	P	chr9	RP11-509J21.3	GCCAGAATTATTCATATGTCTCACTACAGGATGGGCCGGGAGTGTACCTTCATTATGTAG	537	ENST00000427722	Ensembl	+	3691814	3674545	noncoding
ASHG19A3A015657	67.4132	76.0879	87.8256	84.2332	131.173	107.199	139.256	6.20803	6.37561	6.61314	6.28354	7.0105	6.67468	6.97804	P	P	P	P	P	P	P	chr2	AC008280.4	TTATGGGCTGACATTCATGGTCTTGCAGGCAAAACTCAAGTTCCTAGGTAGGACTGAGAA	732	ENST00000422346	Ensembl	+	54312203	54309690	noncoding
ASHG19A3A018991	36.2439	37.4899	45.2773	43.2804	80.8548	96.305	110.216	5.33416	5.42468	5.69518	5.27172	6.28583	6.51454	6.61993	P	P	P	P	P	P	P	chr21	NCRNA00163	CCTCTGGGCTTATAGTGGTTTTCTTTTCTACTGTCTGAAATTGAATGTTTAGTTCATCTA	2155	ENST00000434081	Ensembl	-	46414001	46409778	noncoding
ASHG19A3A016419	1133.69	1077.11	1180.56	481.836	918.006	939.344	1012.8	10.0255	9.95481	10.1403	8.92791	9.95692	9.95757	10.0056	P	P	P	P	P	P	P	chr2	AC069394.1	AAATGAACGAAGTCAAAATTATGCCCTAAGGCAAGCCTTCCCCTCCATGCTTAGAGCTAG	553	ENST00000446520	Ensembl	+	138863475	138859453	noncoding
ASHG19A3A050022	17.7739	30.7332	30.0769	67.3906	24.5897	43.8447	28.6277	4.31762	5.15864	5.13058	5.93862	4.49861	5.34797	4.58708	P	A	P	P	P	P	P	chr13	RP11-252M21.1	TATTCCTTCCAGAAGGAAATTACAGACCACTCTCTGTTTCTACTCAACTGCTTTTCACTC	411	ENST00000440633	Ensembl	+	31457532	31456687	noncoding
ASHG19A3A051789	82.0379	82.1984	82.9941	51.7457	24.6253	31.6154	23.0143	6.48586	6.4802	6.5342	5.54865	4.50057	4.85593	4.24948	P	P	P	P	P	P	P	chr14	AL132709.5	ATGCAATGAGCTGATCATTTTGCTGTGATCAAGGCTATGTTGCCTCTGTGTTAGGCCAAT	800	ENST00000414488	Ensembl	+	101424887	101415314	noncoding
ASHG19A3A043982	39.9077	32.5887	40.0606	37.658	30.7304	34.6066	33.2991	5.4635	5.24087	5.52351	5.0653	4.83656	4.99045	4.81736	P	P	P	P	P	P	P	chr10	RP11-456A18.1	GCAATGTCCAGTTATATCTCCATGATATTTTCTTTGTGGAAGTTGATTGTTCTTCCTTAC	477	ENST00000432535	Ensembl	+	60761303	60759385	noncoding
ASHG19A3A030411	707.678	665.431	679.172	548.525	537.155	564.84	606.826	9.39287	9.30853	9.38852	9.12995	9.15192	9.19111	9.21519	P	P	P	P	P	P	P	chr6	RP11-367G18.1	CCAGGTGATTTGAACAGCCAAATAAGAAACAGGTCCTCTTCAATGTACAATCTGCCAAGT	327	ENST00000427157	Ensembl	-	113971276	113944736	noncoding
ASHG19A3A029434	29.8278	31.3153	35.3208	90.7419	43.9625	121.878	49.9374	5.06229	5.18537	5.34848	6.39664	5.37126	6.8697	5.43211	P	P	P	P	P	P	P	chr6	RP11-146I2.1	AATTCTTGCGAGGATGAACTCAAGATACAAAATATGCTTGGCAACTCACCCCTGAGTGGC	1017	ENST00000437648	Ensembl	-	15090234	14977018	noncoding
ASHG19A3A050106	1474.23	1359.99	1031	52.4064	40.1246	43.2963	40.1238	10.3876	10.2792	9.95267	5.56703	5.23365	5.32849	5.10306	P	P	P	P	P	P	P	chr13	RP11-366O17.2	TTTTTTTAAAAGCCACAGTTTCATTGTCTTAGTCAAAGCAAGATTATTACGTGATTATTT	192	ENST00000419514	Ensembl	+	43386428	43385972	noncoding
ASHG19A3A018802	172.493	143.718	168.241	400.808	406.429	331.236	416.868	7.4958	7.24669	7.4944	8.63846	8.70892	8.3757	8.6386	P	P	P	P	P	P	P	chr21	AP000281.2	ATGCCTATGTTCACCTCTTCCACCTGGATGGATGCTGAGCTCTTAGAAATTGACTTTCCA	384	ENST00000427911	Ensembl	-	34222244	34216676	noncoding
ASHG19A3A030823	6.13043	5.08404	6.82645	218.464	215.17	229.459	231.607	2.91297	2.32536	3.13139	7.70588	7.75759	7.82241	7.74644	A	A	A	P	P	P	P	chr6	RP11-568A7.3	TCCACCTAATGACAGACATACTTGAGTCCCACAGTCATAAGGAGGATGAAGTCTCTCTCT	579	ENST00000454185	Ensembl	-	167653968	167650995	noncoding
ASHG19A3A044240	534.672	458.941	565.707	567.58	891.033	835.425	1018.73	9.01496	8.81375	9.13134	9.1794	9.90839	9.77626	10.0154	P	P	P	P	P	P	P	chr10	BC082979	ACCTCCATGACCCTGCCTCTGAGAAACCAGCGCGTCCGCAACGATCACTCCTAATTTTCG	888	uc001ker.1	UCSC_knowngene	+	89115182	89102678	noncoding
ASHG19A3A042331	16.2811	7.38067	9.49994	23.3598	32.6496	32.5988	35.9154	4.18823	3.45072	3.55128	4.34159	4.92643	4.90168	4.93783	A	A	A	P	P	P	P	chr1	XX-CR54.1	TTCATGGAGCTCTGGCAAGAGCCTAGCCACTTCCATTTATGAATTAAACCTGAATTTTTT	580	ENST00000437830	Ensembl	+	248862411	248855491	noncoding
ASHG19A3A042355	15.3414	7.43896	13.6995	14.3411	21.0412	24.3897	34.7043	4.10808	3.45864	4.04151	3.57824	4.27228	4.46761	4.88307	A	A	A	P	P	P	P	chr10	RP11-69C17.4	TGTACATTCCTTGAAGTCAGGTGCTCTGCTCAACAGAAGGTGTGCTGAATAACGTTACAG	298	ENST00000418524	Ensembl	-	2218626	2211333	noncoding
ASHG19A3A016092	13.694	11.1469	21.191	13.7198	19.0825	19.7459	24.6713	3.95394	3.89744	4.6448	3.49929	4.1261	4.14193	4.36055	A	A	P	P	P	P	A	chr2	AC068535.2	AGTGTTCCTCAGTACTCATCAATTTGTGAGCCACAAGAAATTCTAGCTCTGGAGGCGGAT	471	ENST00000416008	Ensembl	+	105032070	105027658	noncoding
ASHG19A3A030734	816.116	813.691	822.496	784.481	665.971	1220.75	548.293	9.57782	9.5822	9.64943	9.6713	9.47893	10.3566	9.06581	P	P	P	P	P	P	P	chr6	RP1-257I9.2	AAGCCTCCATTGCCCCTCCTAAGCCATGCTTTCCAGCACTGTAATAAAACTGGATTTTTT	554	ENST00000453579	Ensembl	-	155702317	155701644	noncoding
ASHG19A3A039113	973.514	905.179	522.97	1665.56	1608.91	1476.09	1570.81	9.82562	9.72928	9.02308	10.7987	10.7794	10.6286	10.6569	P	P	P	P	P	P	P	chr1	RP11-6J21.2	AATAAGATAGACATGACCTCCTTCCTCCTGGACCTGACAATTGTTCCTTCAAATCACTTC	917	ENST00000417084	Ensembl	+	207482466	207422411	noncoding
ASHG19A3A032568	198.1	194.532	186.741	164.113	197.403	186.18	220.191	7.68888	7.65374	7.64066	7.2762	7.62805	7.50771	7.66849	P	P	P	P	P	P	P	chr7	AC091705.1	GAAAAAGCTATTATTGAACTTCCCAGGAATCTCCCAGGCTGAGAAGTCTACACAATATTC	209	ENST00000412197	Ensembl	-	25590682	25587381	noncoding
ASHG19A3A040430	213.897	186.72	203.995	168.288	222.675	219.919	246.033	7.78579	7.59974	7.75559	7.31395	7.80747	7.76031	7.84351	P	P	P	P	P	P	P	chrX	NCRNA00087	AGGAAAGTTCTTTGCTGATTGCATGTGTGATACAGTGGGGGGTGCCTGAGCCCTCCCCAT	2808	NR_024493	RefSeq_NR	-	134232733	134229014	noncoding
ASHG19A3A055281	133.748	116.76	134.709	105.598	200.295	203.609	235.815	7.15005	6.96193	7.1956	6.61314	7.65015	7.64066	7.77641	P	P	P	P	P	P	P	chr20	BASE	GGAGTTTCTTCCCAGCTCCTTAATGCCTGCAGACAACTGGCCTCCAGAAACCATTGAGTA	558	uc010gei.1	UCSC_knowngene	+	31793009	31786003	noncoding
ASHG19A3A008515	27.0332	5.13842	34.4049	22.3489	20.467	15.7393	16.0651	4.92543	2.32756	5.31014	4.2706	4.23109	3.78122	3.67812	A	P	P	A	P	P	P	chr17	AC036222.1	TTCATCAACACGGTGAAGTTTTATTGTATTTCCGGTCCCCAAGATTTATACCCGGGAGGG	595	ENST00000438772	Ensembl	-	46724152	46710868	noncoding
ASHG19A3A044464	162.184	128.054	77.7545	206.925	190.687	177.264	242.356	7.41685	7.09033	6.43946	7.62332	7.57362	7.43258	7.81968	P	P	P	P	P	P	P	chr10	BC036309	AAACCTAACAAAACAGAAATGAACCCTTGATGAACCTCTTGCTCTGGACTGGTGCCCTGA	2093	uc001kyk.2	UCSC_knowngene	+	107923511	107899923	noncoding
ASHG19A3A000152	19.6717	7.71607	9.08349	9.41799	30.6663	30.2145	36.8569	4.46584	3.49811	3.4889	2.94115	4.83379	4.79075	4.97477	A	P	A	P	P	P	A	chr20	RP5-828H9.3	AGCTGCTTCTGAGCTAACCCACTGAAACCACAGTTGGCATCTGTGTGAAGATGTGAATGG	675	ENST00000422352	Ensembl	-	5426392	5414518	noncoding
ASHG19A3A055266	10254.8	8738.45	10389.1	3551.29	8150.66	7961.59	9164.23	13.1288	12.9168	13.1954	11.9067	13.1617	13.0922	13.2378	P	P	P	P	P	P	P	chr1	BC039493	AAGGCCACTCCCTCCCCAGCCTGAGGAACACTCTACTGGTAAGGGGAGAAATGCCTCAAA	538	uc009wxq.1	UCSC_knowngene	+	181151340	181143619	noncoding
ASHG19A3A019123	5	14.9147	5	280.659	261.885	281.869	336.823	2.37766	4.24263	2.39437	8.09302	8.06471	8.13943	8.31454	A	A	A	P	P	P	P	chr21	AL035610.1	CAGACCTATTAATTCTGAGAGGAAGGAGGTGTCAGGATTTTCACAGAAGAAGAGCACTAA	1122	ENST00000458316	Ensembl	+	29475899	29420765	noncoding
ASHG19A3A050214	5552.4	4030.98	5036.57	7075.32	6783.42	5860.06	5364.05	12.2679	11.8188	12.1836	12.9295	12.8932	12.6496	12.4411	P	P	P	P	P	P	P	chr13	RP11-78J21.4	GTTCTCCCCGACCCCATGCCCTTTTCCCTCATCTTTAATGAGTATCTGTATGTGTGGCAG	721	ENST00000446689	Ensembl	+	53073440	53063127	noncoding
ASHG19A3A050472	19.6355	10.8756	13.6092	19.1273	25.0012	28.769	21.1624	4.46388	3.86677	4.03258	4.03558	4.52079	4.71525	4.11595	A	P	A	P	P	P	P	chr13	RP11-313L9.1	ACTTAACTCTGCTCAGGATTTTAGATCTCAACCCAGGAAATGAGCTACAGTCTCACCCCA	474	ENST00000416090	Ensembl	+	110382354	110380628	noncoding
ASHG19A3A038189	37.2471	59.3252	56.9735	168.332	80.6891	121.738	73.9677	5.36952	6.03458	6.00946	7.31476	6.2821	6.86847	6.02223	P	P	P	P	P	P	P	chr9	RP11-399H11.3	TGTAGAGTCTTGCCTTGGGCCTTCTCGAGTATCCCTTGATGTTCTGCCCAGGAGGAGGGT	527	ENST00000452377	Ensembl	-	138129443	138096567	noncoding
ASHG19A3A029882	10.5967	5.31016	7.74175	31.8753	16.0182	31.1325	23.4214	3.60187	2.33433	3.27743	4.81789	3.84478	4.83297	4.27736	A	A	A	P	P	P	P	chr6	RP1-238O23.4	TCTCTTTTCACATCTCATTACAGAGGCCTTAAGCTCAGATACCCACTGGTGATAGACAGG	449	ENST00000440573	Ensembl	-	41108570	41107593	noncoding
ASHG19A3A013365	142.828	151.275	101.238	344.55	288.084	277.59	383.918	7.2389	7.31375	6.8023	8.41118	8.20523	8.11756	8.51569	P	P	P	P	P	P	P	chr2	AC012506.4	TTGGAGTGAGACTACATCTCCCAGCATCCTGGCAGTTAGACAATTTTCTAGTCTCCTTTG	541	ENST00000421563	Ensembl	-	23604170	23598099	noncoding
ASHG19A3A014418	52.6621	47.7874	40.7563	45.132	87.4914	130.018	86.9107	5.85556	5.75101	5.54887	5.34034	6.40022	6.96414	6.26222	P	M	P	M	M	M	M	chr2	AC020601.1	TTCTATGACTGCACATATATAGTCGCTTCAGAATAGAAAGCCGCTTTCTCCCTTAGCAAG	1269	ENST00000458351	Ensembl	-	138683977	138636323	noncoding
ASHG19A3A039319	356.808	330.412	315.159	132.929	125.615	118.012	197.876	8.48221	8.36888	8.34852	6.95349	6.94638	6.82119	7.50824	P	P	P	P	P	P	P	chr9	AX747401	TTTCCTAATTTGTCAGGATTTTAGGCCACATGGCAGCTGGGGGCAGAAACATTTCTGAGA	1772	uc004bxt.1	UCSC_knowngene	+	132100574	132098802	noncoding
ASHG19A3A043054	81.2524	66.8914	88.6501	120.688	90.5925	82.1547	112.987	6.47334	6.19951	6.62366	6.81229	6.4522	6.27553	6.65658	P	P	P	P	P	P	P	chr10	RP11-475D12.1	TTACATTCTTTCCTCTCATCCCATTGCAATGTTTCCATGCTGAGAGGGCTCCAGAGAGAT	403	ENST00000444137	Ensembl	-	87192271	87191698	noncoding
ASHG19A3A050299	11.7806	6.88267	5	55.2799	48.9457	43.709	54.4978	3.74072	3.37471	2.39437	5.64187	5.53214	5.34202	5.56521	A	A	A	P	P	P	P	chr13	RP11-512C24.2	CAACAGGAGAGAGGACAAAGAAAGGCAGCAAAAGACTATTTCCAATGCGAAATATGATCA	727	ENST00000423629	Ensembl	+	75009296	74993309	noncoding
ASHG19A3A049380	70.0061	7.06346	46.2833	23.4508	31.2313	29.8564	34.1567	6.26255	3.40165	5.72508	4.34803	4.86309	4.7725	4.85658	A	P	P	P	P	P	P	chr13	RP11-90M5.4	TTCAAAACAGAGTCTTACAACTCAGCCACATTTTCTGCTGAGCCAGCCAGTGGGAACAAA	575	ENST00000450264	Ensembl	-	30500788	30492783	noncoding
ASHG19A3A037039	467.983	376.6	367.308	1501.45	1344.53	1183.63	1546.28	8.84397	8.55244	8.56581	10.6515	10.5237	10.3065	10.6378	P	P	P	P	P	P	P	chr9	AY343902	GGACATATTTGTACCCCATCTCTATTTAATGCCTTTATACAATTCTTAATTCTACCAGCC	581	uc003zfy.2	UCSC_knowngene	-	102941	100994	noncoding
ASHG19A3A035081	82.4981	79.3555	64.0104	161	175.378	159.936	171.039	6.49413	6.43239	6.16787	7.2457	7.44904	7.28085	7.28333	P	P	P	P	P	P	P	chr7	CR618431	TAACAATATGTGCAGGCAGGACCGAAAAAAGGTGTGGTGCCTTCCAGCCCATAAATCAAA	1618	uc003vql.1	UCSC_knowngene	+	130613408	130538478	noncoding
ASHG19A3A017227	21.9588	10.7417	18.3641	18.4816	17.1276	14.2669	30.0353	4.6212	3.85121	4.44667	3.9812	3.95111	3.62175	4.66013	A	P	P	P	P	P	P	chr2	AC131097.3	TATGCATTACTCATGGATCAGAGAGCAGAAAGAAACCAGACATTGCCAAGTCCCACCTAG	573	ENST00000415434	Ensembl	+	243020873	242823516	noncoding
ASHG19A3A015233	133.776	129.911	64.4626	195.578	196.095	188.826	230.517	7.1505	7.10871	6.17703	7.54155	7.61547	7.52882	7.73947	P	P	P	P	P	P	P	chr2	AC093642.6	AGCAAAAACAAAACACACACATGCTCCTCTCAAGAGTCACTGGCATCCCAGCTGAAAAGT	561	ENST00000446593	Ensembl	-	243026289	242989845	noncoding
ASHG19A3A049705	23.44	23.4525	23.9255	44.2238	16.8959	42.1255	23.7205	4.71934	4.80599	4.80656	5.30987	3.93025	5.28794	4.29763	A	P	P	P	P	P	P	chr13	RP11-342C20.2	TATAGCCGTTCTGGACATACACATGGGCAGAAGATGTAGCCGCCTTGTGTGAAAATTTGA	510	ENST00000450888	Ensembl	-	88080528	88079468	noncoding
ASHG19A3A043226	195.616	178.132	213.97	284.741	245.279	248.017	272.014	7.67239	7.53551	7.81968	8.11706	7.96334	7.94558	7.9971	P	P	P	P	P	P	P	chr10	AX747408	TTTCTTGATTTTAATCTTGGCAGCCACCCTCCATGACAGCCTTAGGTCTGCACATTCATC	2222	uc001ksy.1	UCSC_knowngene	-	103023307	103012577	noncoding
ASHG19A3A030885	39.8739	38.6464	41.768	36.9089	67.995	60.1285	89.9923	5.46211	5.4656	5.5825	5.03291	6.03117	5.8168	6.31337	P	P	P	P	P	P	P	chr6	RP11-145H9.3	TTCTCTTTTCTCTCTTTCCAAAATCTGGACACACCATGGCCCAGTGATGGAGAAGAAGTC	834	ENST00000440848	Ensembl	+	2640235	2637169	noncoding
ASHG19A3A018417	100.544	88.0333	105.414	71.0455	120.359	132.211	139.503	6.76744	6.5752	6.86085	6.02187	6.88122	6.99242	6.98033	P	P	P	P	P	P	P	chr20	LOC284749	TGTCAGCGTAATCCAAAGAGGACACAAACACCCCTGCTATTTTCTTGTCACCAGGAAAAG	3080	uc010zye.1	UCSC_knowngene	+	46999381	46994389	noncoding
ASHG19A3A025080	13.9467	19.6115	14.7148	26.8574	24.6843	19.6453	29.1925	3.97854	4.58235	4.1402	4.55936	4.50271	4.1347	4.61804	A	A	A	P	P	P	P	chr1	RP4-601K24.1	TTGAAGTGGGTGGTTTGACCTCTCTTTATTGTGGAAGCAAAGCAAATGGCCCCAAACCAT	1712	ENST00000452901	Ensembl	+	83632498	83368865	noncoding
ASHG19A3A049511	585.151	542.614	606.886	17120.8	16326.6	16030.7	16548	9.13212	9.02932	9.23149	14.2386	14.1959	14.1293	14.0992	P	P	P	P	P	P	P	chr13	BC025370	AGGTGTGCGGCATTGCCTCTGGGTCCCTGCTTTGGTTTAATTAAACTAAGTCTGGTGGTG	976	uc001uzl.2	UCSC_knowngene	-	44980021	44974387	noncoding
ASHG19A3A030845	194.498	185.604	191.538	35.6392	18.2325	26.064	67.311	7.66611	7.59095	7.67393	4.98105	4.04976	4.56645	5.88087	P	P	P	P	P	P	P	chr6	RP11-417E7.1	ATTGAAAATAAGACCTTGGAAGAACCCCTTGCAAAGCTGACATTGTACGAGCCAAGGCAG	647	ENST00000439703	Ensembl	-	169563019	169558186	noncoding
ASHG19A3A032373	18.4828	19.5353	18.7303	23.7124	30.9407	28.0632	34.2141	4.3731	4.57807	4.47533	4.36459	4.84963	4.67716	4.86002	A	P	P	P	P	P	P	chr7	AC147651.1	CTGCAGCCTCAAGATTATAACTTCCCAAGCAATGAAGACAATAAATGGATTTTTCACAAA	420	ENST00000434541	Ensembl	-	535755	523743	noncoding
ASHG19A3A020324	437.538	411.697	437.583	235.835	246.502	296.626	302.342	8.76091	8.67321	8.7908	7.82745	7.97018	8.21988	8.15692	P	P	P	P	P	P	P	chr22	TUG1	TTAGAGTCCTGTGTTTGTAATTCCATGCATTTGTTATTTTACCTGTTTTGTCCCTGCCCC	5561	uc003ajj.2	UCSC_knowngene	+	31375377	31368248	noncoding
ASHG19A3A043533	5	5.12196	6.24612	26.6967	24.4912	28.7317	27.6359	2.37766	2.32689	3.02983	4.54888	4.49194	4.71313	4.52667	A	A	A	P	P	P	P	chr10	RP11-464C19.3	GCCTGAACATCATCTATTTAGTTAGCTTGTGTTGTTTAGATGTGCTTCAGATCTCAAAAA	403	ENST00000450152	Ensembl	+	3978004	3974895	noncoding
ASHG19A3A030805	53.3151	51.2784	55.8166	128.466	105.393	153.163	113.172	5.87583	5.84454	5.97999	6.90326	6.6785	7.21305	6.66032	P	P	P	P	P	P	P	chr6	RP11-252P19.2	TCGAAGGTCTTCAAATCATTGTTCCTCCATATCATATTCAGAGCTAGTGCTTTCATGCTG	359	ENST00000431017	Ensembl	-	166188674	166186688	noncoding
ASHG19A3A054761	25.9182	29.5085	57.7061	50.5319	41.8739	24.2961	27.7822	4.86792	5.1059	6.02705	5.51382	5.29953	4.46132	4.53669	P	P	P	P	P	P	P	chr1	RP11-277B15.2	ATTCCAGGCAACGGAAGAGCCTGAATGTGTCCTGACTTCTTGCTTAGCAAAATTGGATCA	971	ENST00000426709	Ensembl	-	167165026	167145153	noncoding
ASHG19A3A017453	21.2815	22.3407	13.5734	41.0844	23.6042	25.2824	43.0326	4.57429	4.74216	4.02843	5.19552	4.43624	4.51929	5.21099	A	P	A	P	P	P	P	chr20	RP5-828K20.2	AACAAACCGTCTCTAGAACGTATGCATTTGAGCACTCCAGTACTCGAGTATCCAAGGAAG	504	ENST00000420928	Ensembl	-	22263310	22260865	noncoding
ASHG19A3A019043	125.782	111.974	123.035	176.235	156.209	135.914	171.213	7.06793	6.90656	7.07134	7.38394	7.27556	7.02949	7.28489	P	P	P	P	P	P	P	chr21	AL050303.7	TGAAACCTTAAACTCTTACTGATTCTTTAAACTGTCCCCATTCCAGTTTTCTCTACAGCA	458	ENST00000444356	Ensembl	+	15144061	15142252	noncoding
ASHG19A3A007319	37.8876	35.7379	43.435	89.9696	42.5157	74.6958	38.1601	5.39236	5.36242	5.63589	6.3835	5.32091	6.14137	5.02609	P	P	P	P	P	P	P	chr13	LOC646982	CCTGGGGAATGTGCCTCAGCTTCTGAATACCATCGGAGCTCCTCTGGAACATGTCCTTGT	3834	NR_024506	RefSeq_NR	-	41055143	40921272	noncoding
ASHG19A3A019639	118.445	98.6538	110.142	184.864	155.237	150.833	205.973	6.98865	6.73544	6.92273	7.45935	7.26549	7.18738	7.57187	P	P	P	P	P	P	P	chr22	RP11-46E17.6	TGATTATCCTTGTTCTGGTCCCATGTATACTCTGTGGGCTACTCCTTTTTACTGGGGGAT	770	ENST00000440477	Ensembl	-	27856021	27853207	noncoding
ASHG19A3A038190	26.8199	21.2206	33.6193	26.815	29.0357	37.2784	39.4678	4.91492	4.6795	5.2785	4.55689	4.75451	5.10471	5.0764	A	P	P	P	P	P	P	chr9	RP11-399H11.2	TTTGGATGTTTCTTAGACCACCGGGGATGCAAGTCTTCTAGTCCTTTCTATTCAGACCAG	886	ENST00000420883	Ensembl	-	138144554	138137541	noncoding
ASHG19A3A031472	60.5984	49.4859	50.6696	71.1782	84.3579	88.376	98.312	6.04806	5.79382	5.84824	6.02405	6.34781	6.38445	6.44288	P	P	P	P	P	P	P	chr6	RP3-503A6.2	GACAGACCTTTCAGTCCTCATTCCACATTGATCTGCTCTACATTCAAAGACTGACTTTCA	400	ENST00000439844	Ensembl	+	38682993	38681826	noncoding
ASHG19A3A030761	192.194	166.656	197.557	309.116	1001.29	1068.42	1158.38	7.64903	7.44349	7.7138	8.23879	10.0866	10.1602	10.2054	P	P	P	P	P	P	P	chr6	RP1-111C20.3	ATCTCACTATCAGTTTAGGAAATTCTCTGGTCTTCATGCTGGCTTCTGACCCTTGTGTCG	331	ENST00000446887	Ensembl	-	159486305	159485759	noncoding
ASHG19A3A043851	452.135	435.945	422.067	93.7794	115.894	195.23	139.649	8.80358	8.74763	8.74552	6.44239	6.825	7.5793	6.9817	P	P	P	P	P	P	P	chr10	RP11-517P14.2	GAAGCTGTTTCTACACTCTCCTGAATGACCATTTTATAGATGCTGGGAAAAAATTGTATT	303	ENST00000442526	Ensembl	+	43917254	43916046	noncoding
ASHG19A3A030839	303.971	304.652	312.188	583.551	227.477	525.195	246.202	8.26118	8.25572	8.33583	9.21888	7.84129	9.07795	7.84436	P	P	P	P	P	P	P	chr6	RP11-503C24.6	AAATGTTTGTTCCTGCAAATGCATCTTCCATCCTGGGTGACAGGAAGTGTCTGGTTCCAT	445	ENST00000445442	Ensembl	-	168702794	168700862	noncoding
ASHG19A3A026688	38.9383	28.039	49.0071	48.1496	49.6985	43.974	55.9104	5.43233	5.03943	5.80352	5.43211	5.55654	5.35113	5.60368	P	P	P	P	P	P	P	chr1	RP5-837M10.2	GTACCCTGTGGAATTGTCTTCAGTTGATAAAAAGGACTTCTCTGTGAGTGTATATTTTAA	467	ENST00000446055	Ensembl	+	100810798	100810032	noncoding
ASHG19A3A018676	203.45	190.797	230.157	207.512	198.8	180.01	213.065	7.72496	7.62765	7.91143	7.62805	7.6392	7.45749	7.62	P	P	P	P	P	P	P	chr21	C21orf131	TGGCAAAGGACGATGGCTGCTCTCCCGCTAACTTTAAATAAGTCATGTCACAAATTGCAT	2124	uc002yky.3	UCSC_knowngene	-	22175426	22114913	noncoding
ASHG19A3A055244	56.8841	45.7446	56.098	96.2987	75.1798	73.451	102.739	5.96516	5.6898	5.98836	6.48088	6.17832	6.1205	6.51005	P	P	P	P	P	P	P	chr9	BC043546	AAAGATAACACCCTCTTTCATCAGAGCGAGCGAGCTTTCTTCATGGTGGCAATTTCCAGT	1234	uc003zpy.2	UCSC_knowngene	+	25812963	25780053	noncoding
ASHG19A3A000321	499.778	514.218	505.402	143.892	150.619	163.677	153.986	8.92545	8.96086	8.98293	7.07315	7.21807	7.31375	7.13352	P	P	P	P	P	P	P	chr22	TUG1	AACTGAGGATGCTCCATCCAAAGTGAATTATGCCTACAGACCTGGTACCTGGATTTTTGC	6477	ENST00000450248	Ensembl	+	31374831	31365642	noncoding
ASHG19A3A039080	479.453	509.133	470.293	425.918	279.273	383.116	275.787	8.87435	8.94813	8.88366	8.72731	8.16201	8.59384	8.01916	P	P	P	P	P	P	P	chr9	BC039487	TCCTGAGATGGCCCCGGCCCTGTTCATGTTACCTGTGTGTTGCTGAGTGGTCTTCTGTTG	1005	uc004bcw.2	UCSC_knowngene	+	109173662	108870331	noncoding
ASHG19A3A037418	60.7949	77.9545	65.4001	82.8483	87.2038	81.8925	92.3157	6.05232	6.40864	6.19604	6.25874	6.39545	6.27141	6.35071	P	P	P	P	P	P	P	chr9	RP11-327I22.5	AACTACAGAATCATTGCTTACATTGACACCGGCCCTGTTGTCCCAATGGATGGGTTTTTT	957	ENST00000447613	Ensembl	-	43160008	43144979	noncoding
ASHG19A3A013085	48.8146	27.434	45.9111	28.5415	60.7167	61.302	68.635	5.7527	5.01143	5.71369	4.65024	5.86311	5.84559	5.91249	P	P	P	P	P	P	P	chr1	RP11-80B9.4	GTTTAACTGCTAATCTGGATCTTATATTCTGAGCCCCAGCTTTTTTCTAAAGCAAAGAAA	446	ENST00000431139	Ensembl	-	240906911	240902728	noncoding
ASHG19A3A038990	37.4665	12.1783	20.4884	39.2013	28.8346	29.2009	21.6792	5.37834	4.00251	4.60072	5.12718	4.7443	4.73656	4.15701	A	P	P	P	P	P	P	chr9	RP11-535M15.1	ATTTGCATGGCCAGAAGCAATTCTTGATCCTCTTGGCTAGATTCGAAGATTTGGCCACCT	425	ENST00000423924	Ensembl	+	99483403	99449337	noncoding
ASHG19A3A044653	10.421	77.5782	17.9829	19.4996	19.9866	16.5656	20.9666	3.58089	6.40156	4.4175	4.06247	4.19522	3.86703	4.09807	P	A	P	P	P	P	P	chr10	RP11-109A6.4	AAGAACACACTTACTGGGTGAAGAGGAAGGACCCTGACACATGTACTAAGAAGACAGCAT	2705	ENST00000430326	Ensembl	+	131584811	131581116	noncoding
ASHG19A3A029323	115.744	113.122	127.196	117.742	157.73	168.404	198.588	6.9559	6.91885	7.11555	6.77001	7.29062	7.35457	7.51369	P	P	P	P	P	P	P	chr6	RP11-420G6.4	ATAACCTTGCTTATGTCTGTTGTTGTATGTCTCAAATACCCTGTCCTCAGGAAGGCCCAC	1588	ENST00000420981	Ensembl	-	2876744	2854890	noncoding
ASHG19A3A038349	417.841	420.568	458.733	294.746	421.448	435.862	493.09	8.69785	8.69869	8.85436	8.16568	8.76662	8.79127	8.90351	P	P	P	P	P	P	P	chr9	RP11-390F4.10	AAGAAACGCGGAGACAGACTACTGGGACTGCGACGTCTCCTCTCCTGTTCGCTGCGATAT	422	ENST00000412339	Ensembl	+	6707780	6704470	noncoding
ASHG19A3A043047	179.829	139.558	184.215	79.3344	157.402	184.411	172.038	7.55272	7.20629	7.62332	6.19287	7.28782	7.49261	7.29432	P	P	P	P	P	P	P	chr10	RP11-219F10.1	TGTTTTGAAGGGGCTGGAAGTCTTTTCTGTCACCACCTTTACCTACCTGTCATCTGTGAA	309	ENST00000432108	Ensembl	-	85672678	85671409	noncoding
ASHG19A3A053834	29.7034	24.2425	21.932	17.8418	42.11	41.1903	59.0181	5.05459	4.84873	4.69006	3.92648	5.3084	5.25121	5.68402	A	P	P	P	P	P	P	chr1	BC029599	CAGTGTGACTCAGTTTCCAGACTCTTTCTCTTTAGACATAAATGAAGAACAAGTCAACCT	834	uc001frq.2	UCSC_knowngene	-	158110429	158101833	noncoding
ASHG19A3A020608	32.4137	41.7763	40.8125	55.7405	19.1471	41.9085	24.4286	5.17595	5.56802	5.55093	5.65212	4.13021	5.27991	4.34537	P	P	P	P	P	P	P	chr22	RP3-355C18.7	CTCATGCAAAGGTCAGCTCCATGATCCCAGTTTGCCTGGGACTGTCCTGGTGTCAGCACT	1016	ENST00000450408	Ensembl	+	50431528	50427792	noncoding
ASHG19A3A030331	670.327	709.162	646.294	431.619	312.033	400.841	323.285	9.32092	9.39437	9.31902	8.75109	8.31798	8.66538	8.25303	P	P	P	P	P	P	P	chr1	LOC645166	GATTCCTTTTATCATTTTGTCCAAAGGCTCCACCTTCCTGAATATTACTGCTTTATACCC	1104	NR_027354	RefSeq_NR	+	148953054	148930404	noncoding
ASHG19A3A039750	25.1208	13.5564	18.618	27.3111	29.089	20.32	13.2367	4.82062	4.12862	4.46698	4.58498	4.75633	4.18562	3.34835	A	P	P	A	P	P	P	chrX	RP11-157D23.2	AATCAAGGAGAACTGTAAACATAGGAAAAGAGGGCTGAACCCATGCTTCCAGGGAAGGAA	786	ENST00000438867	Ensembl	-	39294078	39260505	noncoding
ASHG19A3A000526	51.6215	39.0391	36.2494	46.7458	36.9348	34.4253	43.2988	5.82701	5.47849	5.38773	5.39153	5.11058	4.98244	5.21997	P	P	P	P	P	P	P	chr1		TGCAGCAGAATCCCTAGCTGAAATGGCAATCTTGTGCTAACTGGAAAAAAAGAAAAAAAA	225	HIT000393267	H-invDB	-	148945776	148945552	noncoding
ASHG19A3A053843	28.9658	42.0525	43.7082	31.2171	44.9924	44.1665	46.467	5.02058	5.57907	5.64525	4.78376	5.40858	5.35784	5.32414	P	P	P	P	P	P	P	chr1	RP11-404O13.5	TAAAATTCCATGTGATCTAAAATTCCATCATTCTATCATGAGCCCAGGAGCTCCTGCTAC	1999	ENST00000415019	Ensembl	-	158173667	158167711	noncoding
ASHG19A3A055255	77.8682	97.5085	99.6712	217.05	132.778	190.733	131.908	6.41668	6.72008	6.78099	7.6958	7.03064	7.54337	6.89039	P	P	P	P	P	P	P	chrX	LOC92249	GCAGTTGGATGGCGGTGACTGCGTGGTCCTGCAACCCTGGTTCCAGTCTGGCAAGCATTG	2713	uc004dvh.2	UCSC_knowngene	-	62780873	62646438	noncoding
ASHG19A3A043628	18.0203	15.2923	21.8356	36.269	34.5131	37.0638	39.3451	4.33803	4.27228	4.6846	5.00837	5.0096	5.09631	5.07013	A	P	P	P	P	P	P	chr10	RP11-445K13.2	ACGCAGACATGTTTTAGAATACAAAAGACACCAAGCTTTCTTTGGGAAACACGTCCTGTT	454	ENST00000448272	Ensembl	+	13465133	13457201	noncoding
ASHG19A3A051325	139.517	113.819	151.078	43.8634	48.6216	58.8847	60.9497	7.20886	6.92752	7.351	5.29621	5.52247	5.78533	5.72961	P	P	M	P	P	P	P	chr1	RP4-704D21.2	ATACAAGTTATAACAATGTAGCAATTGACCCAGCAAACGAGGACACAAACGTGTTGAAGG	727	ENST00000425109	Ensembl	-	146475178	146473498	noncoding
ASHG19A3A007500	33.854	32.269	35.6264	57.9075	51.8712	60.6978	56.937	5.24003	5.22628	5.36019	5.71094	5.61995	5.83049	5.63329	P	P	P	P	P	P	P	chr6	LOC153910	CTTCTCATCAGCACGTGTCTACAGTTGCAAgttctcactctgtagcccagtctggagtgc	2293	NR_027312	RefSeq_NR	-	142959026	142847591	noncoding
ASHG19A3A018465	72.985	54.1025	74.2233	53.2018	98.0664	91.626	106.39	6.32248	5.90982	6.37595	5.58858	6.57006	6.43993	6.56695	P	P	P	P	P	P	P	chr20	RP5-1010E17.1	AGACTGTGCCCCACACAACTCTGCAGCATAACCTTGCAGTATGAAAATAATGCCTCTCAT	1340	ENST00000416190	Ensembl	+	54084752	54039580	noncoding
ASHG19A3A015354	40.2873	25.6255	31.8262	33.8751	43.3554	36.2463	45.0139	5.47668	4.91718	5.20655	4.90473	5.35093	5.06118	5.27766	P	P	P	P	P	P	P	chr2	AC008069.1	AGCCTTCTTAGCTTGGATTCTTTGATGAAACACCACCATATTGGAGCATTCCACCTGCCA	596	ENST00000448650	Ensembl	+	16948822	16909390	noncoding
ASHG19A3A000339	429.074	393.44	355.357	113.506	227.283	246.203	263.933	8.73363	8.60949	8.51714	6.71656	7.84062	7.93506	7.95012	P	P	P	P	P	P	P	chr1	RP11-403I13.7	CCCCCTTCGTGACCACGGTCTCTTTCCTGCCAGGGCACTGGCAACAGTTTTCCGTTTGTG	695	ENST00000452637	Ensembl	+	149287106	149284644	noncoding
ASHG19A3A026922	49.1211	42.8846	44.6637	38.1601	44.6117	50.022	54.5829	5.76199	5.60534	5.67718	5.08455	5.39509	5.54296	5.56722	P	P	P	P	P	P	P	chr5	AK123868	TCATTTACTCACTGGGAACCTCGGAGGATTTCAGCTGATGTTTTTCTCTCCTTAGACAGT	2767	uc003kbl.1	UCSC_knowngene	-	70742169	70647681	noncoding
ASHG19A3A042732	11.6743	28.9962	22.2487	26.5954	5.52343	17.9049	21.0386	3.7291	5.08285	4.7105	4.54206	2.47786	3.98777	4.10441	P	A	P	P	A	P	P	chr10	RP11-144G6.10	TTGAGTCAATGAGCTCTTTGGTCTGCTCTTCTGCTCAAGCAGAAAAGGATTGGCACTTCA	709	ENST00000439776	Ensembl	-	47289833	47279191	noncoding
ASHG19A3A045322	13.4474	5.47049	6.4137	29.7259	27.409	25.1611	27.7226	3.92528	2.50236	3.05731	4.70906	4.66413	4.5124	4.53251	A	A	A	P	P	P	P	chr1	SKINTL	ACTTGCTACCTTCAAAACCCTGTAACCGGTCAAGAGGAAAGGACAAGCATTGTCTTACCA	1526	NR_026749	RefSeq_NR	-	48648100	48567386	noncoding
ASHG19A3A050485	219.799	214.582	223.997	330.592	312.734	266.344	284.667	7.82397	7.78767	7.87554	8.34535	8.32051	8.05178	8.06736	P	P	P	P	P	P	P	chr13	RP11-365P13.3	GTGTGTTCCCTTGCCCTTAGATGAAGAAATGCTTTCAAAACCTCTGAAGATGCCTGAATG	684	ENST00000440735	Ensembl	+	111642911	111635653	noncoding
ASHG19A3A041003	8.74382	264.106	15.0011	25.1609	25.888	31.3941	36.0203	3.33349	8.06319	4.17248	4.45457	4.57457	4.84541	4.94334	P	A	A	P	P	P	P	chrX	RP11-348F1.2	ATCTGAAATAGTTATTCAGCAATACAAAAATGGTATTGCGGGGTTCTGGGGCAGCCCCTT	406	ENST00000455931	Ensembl	+	51208513	51139382	noncoding
ASHG19A3A007949	144.77	146.43	145.521	819.826	844.885	926.843	929.949	7.2549	7.27052	7.30118	9.74462	9.82646	9.93559	9.8707	P	P	P	P	P	P	P	chr17	AC015842.1	GCCTGGAACTTAAAACAACGACAACAACAATGTCCAGATAAACCCAATAAAATAGGTTTT	2998	ENST00000423323	Ensembl	-	13695867	13679950	noncoding
ASHG19A3A031055	17.7501	11.4265	20.74	32.1965	30.5299	28.3043	27.4198	4.31518	3.92847	4.61776	4.83147	4.82801	4.69077	4.5171	A	P	P	P	P	P	P	chr6	RP11-439H9.1	TACTTTCCATTGAGGAAACAGGTTGGAGGTGGGAGGCTGTAACCATGCTTGATTTTGTAC	312	ENST00000431001	Ensembl	+	23346788	23337938	noncoding
ASHG19A3A030167	183.655	170.523	197.093	129.331	247.383	281.647	314.794	7.58157	7.47571	7.71126	6.91199	7.97657	8.13816	8.21784	P	P	P	P	P	P	P	chr6	RP3-390M24.1	GTGAAGATTTTACAGGTAACACTTCCTTTCCTTCCTTTGTTTTGATAACAGATGGAGATA	387	ENST00000449463	Ensembl	-	79315753	79314183	noncoding
ASHG19A3A000150	21.7238	20.1805	21.7672	101.401	150.688	153.506	160.534	4.60455	4.61756	4.68022	6.55318	7.21896	7.21732	7.18901	A	P	P	P	P	P	P	chrX	XIST	TGGATAGAGGACCCAAGCGAAAAAGTTTCTGGCATCACTACCACTACTGATTAAACAAGA	446	ENST00000421322	Ensembl	-	73046641	73040487	noncoding
ASHG19A3A016126	114.028	100.209	121.984	83.237	138.321	142.739	158.551	6.93398	6.75602	7.05827	6.26524	7.09099	7.10265	7.17209	P	P	P	P	P	P	P	chr2	AC096669.1	TCTTTTTGTATTAATGCATCATGTGACTCCCTCGTTTGGACTTCTGCAGGAACATGTCAG	616	ENST00000413708	Ensembl	+	108023785	107978774	noncoding
ASHG19A3A014241	11.8846	32.5328	14.71	43.0514	29.0861	40.7336	34.0268	3.75275	5.23833	4.1396	5.26312	4.75606	5.23502	4.85021	P	A	A	P	P	P	P	chr2	AC104653.1	GTGAAATACCAGAAGCCATCTTTGTTTCTGGCGATGTCACTAAATAAGTATTTGTTGATA	390	ENST00000446401	Ensembl	-	114600933	114588764	noncoding
ASHG19A3A034249	41.7946	32.8962	38.3144	15.2433	62.0995	66.1246	79.7473	5.52871	5.2528	5.46447	3.67627	5.89799	5.96418	6.13724	P	P	P	P	P	P	P	chr1	RP11-479J7.2	AGGAGGTTTATGATCACCTCGGAGTTGTTCAGCAATGAGACACTTGCCTTGAACAAAAAG	423	ENST00000425271	Ensembl	+	166304999	166304120	noncoding
ASHG19A3A051630	12039.6	11528.7	11488.2	27880.9	26539.6	25383.1	27173.5	13.3465	13.2991	13.3367	14.9652	14.8776	14.7961	14.8239	P	P	P	P	P	P	P	chr1	RP11-277L2.3	TCCTTCTGAATTCGGTCTTGCCTTGAACACATCCCCATTAAATAAATCCTTGGAAAAGAA	561	ENST00000447883	Ensembl	-	149577296	149576590	noncoding
ASHG19A3A050296	5	5.02466	6.86834	48.8176	51.081	61.1447	56.3857	2.37766	2.32294	3.13923	5.45655	5.59452	5.84235	5.61625	A	A	A	P	P	P	P	chr13	AK056689	ATTACAGGAAACCTTGAAGTGGATATGGAAGCTTGGCAGCCAGCTTGGATCTTCCTAAGA	1518	uc001vji.1	UCSC_knowngene	+	74832291	74805593	noncoding
ASHG19A3A030457	540.783	584.929	590.624	336.044	311.483	350.018	353.619	9.02858	9.13108	9.18878	8.37248	8.31418	8.45615	8.38747	P	P	P	P	P	P	P	chr1	RP11-277L2.2	CATACTTACTTCTGGAAATATATGCCTTTCCTAAAACTTAACCACACATCCACTACCATG	5730	ENST00000445225	Ensembl	+	149651107	149576489	noncoding
ASHG19A3A019487	105.016	95.2253	114.513	87.3596	87.2231	85.4877	96.5637	6.8234	6.6868	6.97148	6.33816	6.39571	6.33474	6.41637	P	P	P	P	P	P	P	chr22	XXbac-B33L19.4	AACTGGAAAAGTGGCCGTGTGGGCTGGTGCTTTGGTGATTTAATGAGTAAAGTCTACAAC	446	ENST00000458154	Ensembl	-	20331888	20330725	noncoding
ASHG19A3A009237	19.8185	5.03613	9.24109	34.5201	49.1885	53.5104	57.1255	4.47502	2.32341	3.51409	4.93508	5.53995	5.64798	5.6386	A	P	A	P	P	P	P	chr17	AC115989.1	CAAGCCCTTTTCTATCTGGTGTACATCTTGAGGATAAACTGGAGCAAAGTTGTGGAGCAG	1150	ENST00000452153	Ensembl	+	19537138	19532763	noncoding
ASHG19A3A049948	185.482	161.056	199.393	97.4047	327.743	349.151	391.96	7.5988	7.39996	7.72715	6.49465	8.3943	8.45205	8.54232	P	P	P	P	P	P	P	chr13	RP11-760M1.2	TGCTCTTAATCCTCCCTTGGCGACCTTCTACTCAGACATCATCTTTTATGCAGAGAAGCA	398	ENST00000443778	Ensembl	+	24060449	24044185	noncoding
ASHG19A3A049509	43.6837	27.3185	33.9268	22.0973	33.258	36.87	52.0283	5.59349	5.00579	5.28964	4.25511	4.94972	5.08993	5.49576	P	P	P	P	P	P	P	chr13	RP11-478K15.5	TCTTTCATCGGAAAACTATGACATGCTTCATTTTGTTTCCCAGGGTGGTAGCCACAGTCG	323	ENST00000421190	Ensembl	-	44810195	44806060	noncoding
ASHG19A3A017804	94.8949	100.783	101.105	10.7316	12.2133	12.1641	19.9188	6.68562	6.76424	6.80067	3.12612	3.40729	3.36151	4.01807	P	P	P	P	A	A	A	chr20	RP5-1112F19.2	GAATTGTGCATGCAACTTCCAATCTGACTTTTCTGAGACATTAATAAAAACACATGCGTC	2326	ENST00000438154	Ensembl	-	50479451	50448335	noncoding
ASHG19A3A017461	168.095	161.003	189.631	387.371	356.838	386.641	445.673	7.46404	7.39858	7.66051	8.58219	8.51404	8.60774	8.74306	P	P	P	P	P	P	P	chr20	RP11-359G22.2	AACTATACCAGTCCTCTGTTCCTGGTCTCTGGAGCTTCAATTTGGGAAAGTGACCCATTA	565	ENST00000437696	Ensembl	-	22665982	22664299	noncoding
ASHG19A3A016422	48.8423	41.7276	46.6982	41.0299	61.6463	73.158	79.6357	5.75362	5.56643	5.73554	5.19332	5.88458	6.11416	6.13574	P	P	P	P	P	P	P	chr2	AC114763.1	AAATAAAGCACACATTCCCTTTGGCACTAAATTTGACTCGGCAGCGTCTGTACAGGGATC	826	ENST00000412593	Ensembl	+	139231502	139228225	noncoding
ASHG19A3A023095	9.61404	21.6799	18.7644	291.105	38.9239	250.535	60.2409	3.46823	4.70476	4.47847	8.14724	5.19168	7.96149	5.71202	A	A	P	P	P	P	P	chr1	RP1-158P9.1	AAACATTCCTTTGGGTTCAGTTCAATCGCCTGCAAGTCACGTTTCCACACAAACATGTCC	731	ENST00000435828	Ensembl	+	56620896	56611392	noncoding
ASHG19A3A050377	97.2483	140.007	91.922	585.089	141.629	477.12	162.091	6.72132	7.21169	6.66814	9.22434	7.12707	8.93507	7.20375	P	P	P	P	P	P	P	chr13	BC038529	GTTTTTAAGATGCATCAGTTCCCCTTTCCAGCCTGAAGCCTCATCATCAAACAATGCTTC	1000	uc001vlo.2	UCSC_knowngene	+	91187593	91145541	noncoding
ASHG19A3A038656	728.633	724.188	721.425	120.059	90.0871	107.865	106.217	9.42857	9.42581	9.46593	6.8018	6.44325	6.68323	6.56482	P	P	P	P	P	P	P	chr9	RP11-374M1.4	TCTAACACTAGTTTTACCCTTGTCAGCACTTTGCCGAAAACCTCAAATAAAGACTTTTTT	492	ENST00000421848	Ensembl	+	45023236	45004878	noncoding
ASHG19A3A040914	54.2845	53.3532	77.4292	107.097	43.2763	92.817	41.1542	5.90155	5.89248	6.43228	6.63413	5.34637	6.45933	5.14361	P	P	P	P	P	P	P	chrX	RP11-571E6.3	CATAAGTTCTGGGTCTTTATTCAGTTAGTTAACATTATTACCTTGTTCCCTCAACCATGA	477	ENST00000366224	Ensembl	+	47158120	47157250	noncoding
ASHG19A3A018526	108.06	84.9667	106.1	156.066	157.465	152.025	127.074	6.86242	6.52462	6.86923	7.19771	7.28831	7.20049	6.83262	P	P	P	P	P	P	P	chr20	RP5-1043L13.1	TTAAAGGGCCCCATTTCCCATTTGCTGCAGAAGATGTTTAATTGGAAGTCTCTCCCTGTC	499	ENST00000437035	Ensembl	+	59102516	58755935	noncoding
ASHG19A3A040303	19.2581	14.8265	19.4061	16.4879	23.8939	16.4969	22.8831	4.43542	4.23619	4.52855	3.80036	4.4537	3.85998	4.239	A	P	P	P	P	P	P	chrX	LOC642776	TGAACAGAAAAAGAGGATACCTCTGCGATCCCGGGTCATCTCCAGATGCTAGGGTTATGG	2079	uc004eqg.1	UCSC_knowngene	-	115085422	115033603	noncoding
ASHG19A3A019926	34.1364	35.4451	41.644	48.0354	47.1241	60.4153	68.4913	5.25238	5.35164	5.57778	5.42917	5.47754	5.82358	5.90888	P	P	P	P	P	P	P	chr22	RP1-102D24.5	TTCCCATGGACTGGGCCTTTGCACACACATTGCACCAAATTCTCACAGCAGCCGAGCCAG	545	ENST00000454439	Ensembl	-	45844624	45831743	noncoding
ASHG19A3A019435	14.8408	8.47918	14.6134	14.6692	16.5015	28.2245	26.3496	4.06547	3.59282	4.13058	3.61348	3.89324	4.6862	4.45654	A	A	A	P	P	P	P	chr22	CECR3	ATTTCTCATAACCCTGGGAAGTTGCATGCTGTTTCCTTAGCAGCAGAGTAAGCCTCAAAG	1915	ENST00000428828	Ensembl	-	17747623	17737748	noncoding
ASHG19A3A000041	37.2065	45.7274	503.907	85.5835	44.5079	53.9467	26.0613	5.36764	5.68939	8.97823	6.30591	5.39144	5.65902	4.44002	P	P	M	P	P	P	P	chr9		GCTTCGCCTCTCACTGGAATTACAGATGGTGGATTGGAAACAGTGTCAGCATGACTCTCC	1271	BC045813	RNAdb	-	96966848	96938888	noncoding
ASHG19A3A015595	940.431	832.851	906.904	1033.03	905.709	932.606	633.844	9.77796	9.6188	9.78166	10.0886	9.93559	9.94696	9.28601	P	P	M	P	P	P	P	chr2		AAATTCTCTCTCAACCTCTCTTTCTCTCTTCCCTCATTGAGATCACCAAAGTGGTGTGGA	2195	BC024156	misc_RNA	+	45167235	45165058	noncoding
ASHG19A3A038842	14.778	19.3016	10.3734	59.6675	44.7939	45.3423	120.308	4.05826	4.56278	3.66931	5.75815	5.40117	5.3987	6.75615	A	A	A	P	P	P	P	chr9	RP11-15B24.5	ATGGACAGACCATGTGCCTTACAGCAAGAAAATTCTGTGAATAAACAGGAAGCCAGCCAG	394	ENST00000457558	Ensembl	+	85043202	84888320	noncoding
ASHG19A3A043762	145.996	127.233	151.575	100.505	400.18	358.165	505.526	7.26634	7.07914	7.35594	6.5399	8.68279	8.48735	8.94018	P	P	P	P	P	P	P	chr10	RP11-253D19.2	TTTCAAGACCAGCCTGCTTTCAAGGTGTCAACTGATCGTGTAGACAATGTCTCAAAAAAC	378	ENST00000426067	Ensembl	+	30869111	30865627	noncoding
ASHG19A3A023576	35.6112	162.526	41.1696	42.696	38.2272	36.1321	59.5253	5.31181	7.41076	5.56126	5.25135	5.16422	5.05824	5.69638	P	P	P	P	P	P	P	chr1	RP11-335E6.3	GGCCTAGACCTGATCCAAAGTCAGTTTTGTGCTTTGTTCCTATGACGTTGGCCCATAATA	754	ENST00000449140	Ensembl	+	63717442	63715693	noncoding
ASHG19A3A020523	53.8848	58.475	45.2247	37.6197	31.4987	42.506	48.916	5.89001	6.01658	5.69405	5.06245	4.87338	5.30175	5.39983	P	P	P	P	P	P	P	chr22	CTA-126B4.7	TTTCCCTTAATGCGCAGGTGAAAAGGGCACCTCGGTGGATTCTACTAAATTTAATAGAAG	572	ENST00000428765	Ensembl	+	42842201	42834028	noncoding
ASHG19A3A039106	81.3075	91.6806	91.9918	85.1451	121.998	145.386	137.881	6.47425	6.63493	6.66918	6.29875	6.90089	7.13243	6.96404	P	P	P	P	P	P	P	chr9	RP11-410K21.2	ACAAAATTCATCCTCAATGCTGGTTACCTGCCCCATGCAGATGCTGGCATTTAAAATGTT	635	ENST00000451108	Ensembl	+	113367499	113361754	noncoding
ASHG19A3A026854	11.8425	9.54145	8.54823	33.277	29.7996	27.9408	41.1089	3.74825	3.72054	3.40594	4.87732	4.79068	4.67054	5.14225	A	A	A	P	P	P	P	chr1	RP11-153F1.2	GAGGTCTCCAACTCATTTGATCTGAATTTCTGTCAGAAATAATGGTTTTCATTATGACTC	418	ENST00000414923	Ensembl	+	103968087	103957500	noncoding
ASHG19A3A030127	24.205	24.5453	25.9603	35.4381	33.1098	39.0574	42.8151	4.76727	4.86348	4.92665	4.97357	4.94453	5.17521	5.20318	A	P	P	P	P	P	P	chr6	C6orf155	GGTACTCCACTGGGCATTTTCTCTTCATGGAGCTTATAGCAACAAAAGTGTTTTACAAAA	2933	NR_026807	RefSeq_NR	-	72130448	72124148	noncoding
ASHG19A3A031974	26.6964	19.8904	29.8744	32.5016	34.2187	40.473	45.1277	4.90929	4.5996	5.12126	4.84256	4.99527	5.22492	5.28113	A	P	P	P	P	P	P	chr6	RP11-112L15.4	GCCAAAGGAAACCTTCATTTTATTGCTTGTTCCCACAATAAATTAGAGCTTATCAGCAAA	343	ENST00000431399	Ensembl	+	114453467	114437279	noncoding
ASHG19A3A013690	61.3083	53.154	59.8678	26.9755	66.191	84.662	96.3114	6.06446	5.88853	6.07674	4.56583	5.98907	6.32013	6.41251	P	P	P	P	P	P	P	chr1	RP11-978I15.9	ACACACTTCCTGAAGTAAGATGCATTTCACAAAGCTCCCAGTTTCCAGAAGGATGGAGCA	1638	ENST00000420469	Ensembl	-	247690054	247687980	noncoding
ASHG19A3A042518	287.235	318.691	295.472	201.53	328.765	367.457	383.079	8.17792	8.32078	8.26075	7.58404	8.39971	8.52727	8.51272	P	P	P	P	P	P	P	chr10	RP11-275N1.1	AGTGAGTAAAGGGAAAATTTTCACTTCTTCCTATGGAAGCCTGTCACCCCCCAACTCCAT	439	ENST00000433460	Ensembl	-	21661879	21629161	noncoding
ASHG19A3A049382	76.6049	81.2371	99.3532	265.172	242.385	250.051	236.761	6.39152	6.46424	6.77658	8.00838	7.94302	7.95897	7.78233	P	P	P	P	P	P	P	chr13	CR592782	TTGGAATGCATCCTCCACTTTAGCAAAAGAATTATGTGTTTTGTTTGCTCTTCATCATGT	2567	uc001usr.2	UCSC_knowngene	-	30683005	30677365	noncoding
ASHG19A3A048648	26.1231	12.9767	20.4925	140.989	105.334	127.182	134.876	4.87911	4.07779	4.60096	7.04279	6.67762	6.93367	6.92542	A	P	P	P	P	P	P	chr1	RP11-413P11.1	GTAGAACAGTGTTCCTTCCTCTGAACATGGCTACAGAAGAACAAATCAGTTAGTCTGAAG	495	ENST00000438829	Ensembl	-	99999571	99937917	noncoding
ASHG19A3A032188	397.807	315.422	382.748	141.011	367.207	363.66	442.046	8.62764	8.30563	8.62305	7.04353	8.55516	8.51379	8.7306	P	P	P	P	P	P	P	chr6	BC041998	GCCCCCTTCTATTCATTATTTCCTGTACCAAACTCATTTTGTAAACTAAGATCAAGTCTA	2592	uc003qmi.2	UCSC_knowngene	+	149544216	149539061	noncoding
ASHG19A3A007506	1426.14	1453.09	1432.9	790.408	804.741	818.798	841.378	10.3417	10.3692	10.4025	9.68031	9.75513	9.74836	9.71285	P	P	P	P	P	P	P	chr1	LOC645166	CTCCAAGACCTCATCAACAATTAAGACTCTTTGGCAGTTGCACTGGGTACTGGCTGAGTT	670	NR_027355	RefSeq_NR	+	148951595	148928285	noncoding
ASHG19A3A055229	39.0153	23.1756	35.2893	15.5427	40.9561	50.2764	54.5302	5.43451	4.791	5.34691	3.70963	5.26711	5.55079	5.56637	A	P	P	P	P	P	P	chr6	BC039503	TCCTACAGATGATGACAGTTCTCATTCTCCAGCAGCAAATAATCCCAAAGGAGGTAAACA	1292	uc003qir.2	UCSC_knowngene	+	140181606	140092209	noncoding
ASHG19A3A018696	38.0817	76.4294	47.9202	192.169	51.6074	137.105	49.1681	5.399	6.38156	5.77295	7.51488	5.61228	7.04251	5.40706	P	P	P	P	P	P	P	chr21	AP000402.3	ATATGACCCAAAATCCACTCCTCACTTGGACACTGCTCTGGTTATGATGGCTGACAAGAA	540	ENST00000446404	Ensembl	-	26275070	26258989	noncoding
ASHG19A3A038936	61.7305	53.067	50.5238	166.627	148.755	138.551	176.876	6.07576	5.88638	5.84343	7.29819	7.20075	7.05888	7.33524	P	P	P	P	P	P	P	chr9	C9orf44	CAGGGAAGGGAAGGTAATTGAAAGTTTACAAAAACAAAACCCCATTCACATTCTTAAAGT	2000	NR_027341	RefSeq_NR	+	94921890	94903748	noncoding
ASHG19A3A043233	43.0194	48.3297	51.2961	64.4721	76.8685	74.7221	101.304	5.57046	5.7626	5.86451	5.8741	6.21047	6.14189	6.48739	P	P	P	P	P	P	P	chr10	RP11-190J1.3	AAGTTCTGTGGAGGTTTCTAATCCTTTCTGCCAAAGAAGAGAAGAGAGAGAATCACTCAG	291	ENST00000458489	Ensembl	-	103468158	103464408	noncoding
ASHG19A3A017276	75.4099	67.1418	71.5551	160.436	137.224	128.116	144.904	6.36723	6.20419	6.32248	7.2389	7.07729	6.94257	7.03956	P	P	P	P	P	P	P	chr1	RP3-340N1.6	AGGAGAGAGTGACCCAGTCAACATCCAGCCCCATCAGCATGTGACTTATCCAGCCCCAGT	480	ENST00000435552	Ensembl	+	20571148	20569587	noncoding
ASHG19A3A049332	104.114	91.437	98.4955	55.6175	61.9653	61.1453	72.8839	6.81371	6.6311	6.76424	5.64935	5.89492	5.84244	5.9972	P	P	P	P	P	P	P	chr1	RP11-195M16.1	CAAAAAATAAAAGACCAGAAGCCAGTGTTTAGGCACAGTGGATAGGACATTCCCTACCCC	450	ENST00000415166	Ensembl	-	110428886	110426797	noncoding
ASHG19A3A016048	421.428	514.176	453.719	596.578	384.805	525.325	470.009	8.70945	8.9602	8.8403	9.25396	8.63005	9.07862	8.82209	P	P	P	P	M	P	P	chr2	AC104782.3	ACAGAAAATGCTGTGCTGGCCTGGCCCTCCCACAAACACTCCAGTTTCACGGGCTGAAGA	581	ENST00000441036	Ensembl	+	100865724	100859092	noncoding
ASHG19A3A009077	67.1092	74.5463	61.3847	91.7452	84.3929	84.5919	127.598	6.19991	6.34646	6.11474	6.41076	6.34825	6.31868	6.83901	P	P	P	P	P	P	P	chr1	RP5-1011O1.2	CAATTATTCTCCTGTTTTATCCAAATTATTCCCTTCTGCAAGACTCACATCAAGTACGAT	396	ENST00000434300	Ensembl	-	192536347	192486768	noncoding
ASHG19A3A042675	16.92	39.6691	12.1892	19.9042	19.3027	23.3706	19.7401	4.24263	5.49919	3.88217	4.09412	4.14266	4.39956	4.00444	P	A	A	P	P	P	P	chr10	RP11-272J7.4	TGAAAGCCTGCCAGGAAACACATCCCGGAAATGAGATCTACTCTAGAAAATACAAGGAAG	408	ENST00000419406	Ensembl	-	44274273	44273009	noncoding
ASHG19A3A049381	12.5807	42.2951	13.4219	17.3949	16.1477	19.9453	24.2083	3.83333	5.58737	4.01289	3.88602	3.85897	4.15465	4.32873	P	A	A	P	P	P	P	chr13	RP11-629E24.2	GTATGGGCTCAGCATGTTCTTGGGAGACTGCTTTAAATCTTATTATTTTATAGTCTTCTG	1780	ENST00000492894	Ensembl	-	30597937	30596157	noncoding
ASHG19A3A055179	39.5866	55.3414	44.7617	79.966	48.0771	52.7395	56.9589	5.45235	5.94196	5.68025	6.20591	5.50763	5.62537	5.63433	P	P	P	P	P	P	P	chr21	BC046564	TCACCTGACAGGCTCACCAGAACCAGCACAGCTGCTGAGTTTTGGCTCCCGGACCCTGGA	744	uc002zgn.1	UCSC_knowngene	-	46414001	46411186	noncoding
ASHG19A3A030868	64.5091	55.9616	65.0452	124.288	105.013	118.278	140.462	6.14015	5.95857	6.18925	6.85795	6.67326	6.82431	6.98953	P	P	P	P	P	P	P	chr6	RP3-416J7.3	AACAACACGTGTCCCTGCAGTTTGCTGAATTTCAGGGCATCACCACCTTTTTTCAAGAGT	751	ENST00000458006	Ensembl	+	156639	155134	noncoding
ASHG19A3A032368	41.8317	28.0229	39.5766	36.3306	49.8196	62.0496	70.7496	5.52923	5.03837	5.5063	5.01029	5.56045	5.86285	5.95351	P	P	P	P	P	P	P	chr7	AC093627.7	TTCTGTGGGTGGATTATCTCTCTGGATCTTTCTAAGTGAGTCCTGTGTTTCACCACAGCT	759	ENST00000465755	Ensembl	-	71835	70971	noncoding
ASHG19A3A020108	106.912	102.05	115.547	73.2377	147.213	170.858	182.634	6.84653	6.78045	6.98262	6.06672	7.18471	7.37663	7.38583	P	P	P	P	P	P	P	chr22	XXbac-B444P24.8	TGGTTTAAGTTATTTTCTGTCAGCATCAACTTATTCCCCAGCCCATATCCGCAGGCCTCA	2183	ENST00000424052	Ensembl	+	20192440	20186295	noncoding
ASHG19A3A013546	41.7355	40.1167	44.3892	36.5768	82.2236	94.9537	106.153	5.52591	5.51399	5.66805	5.01931	6.31356	6.49361	6.56404	P	P	P	P	P	P	P	chr2	AC006038.4	CAACTCTGTGCCACATCCTCTTCATTTTAGAATCCAGGATGAAGGATATGCCCTTATCTG	603	ENST00000423797	Ensembl	-	42652228	42592809	noncoding
ASHG19A3A042543	17.2815	18.109	25.1453	78.9483	32.6568	61.3803	36.2743	4.2708	4.48385	4.87911	6.1851	4.92665	5.84799	4.95341	A	A	P	P	P	P	P	chr10	NCRNA00202	TCTCAGGCTTGTTGCATCCAGGCCCTTCTAAAATAAACCAGACAGGTTGGCAGGTTTTTT	1787	ENST00000458084	Ensembl	-	27226788	27220134	noncoding
ASHG19A3A043896	280.572	370.526	336.646	883.82	462.585	754.173	470.714	8.1449	8.5306	8.44239	9.85625	8.92044	9.6273	8.82491	P	P	P	P	P	P	P	chr10	ANTXRL	ATAATGGGGAGCCATGAGTCCCTGGGGCCCTACTTCCTGGTCTTCCTGCTGCTGCTGCTG	634	ENST00000441923	Ensembl	+	47665128	47658248	noncoding
ASHG19A3A018515	260.101	327.806	315.543	1391.78	1197.99	1173.39	629.706	8.04648	8.35864	8.3505	10.539	10.3462	10.2947	9.27385	P	P	M	P	P	P	P	chr20	RP11-164D18.2	AATAGAAAGTAATTCTCCATGTGTCTTCCTCCAGCTCCAATCTAGTTTAAAACCATCCCC	566	ENST00000443747	Ensembl	+	58091094	58090245	noncoding
ASHG19A3A020595	21.6816	19.0512	22.0853	25.7568	21.7904	27.6869	37.9725	4.60072	4.54673	4.69949	4.49334	4.32033	4.65697	5.01946	A	P	P	P	P	P	P	chr22	RP11-536P6.3	AGAAAGAAGACACGGTGGGCGGATTCAACAGTCTTATGGGGTCACAATGCACAGGGCTTG	568	ENST00000453866	Ensembl	+	48847029	48844701	noncoding
ASHG19A3A031051	218.99	200.979	217.417	68.0182	62.9724	76.7887	84.9724	7.8182	7.7012	7.83928	5.95392	5.91882	6.18039	6.23005	P	P	P	P	P	P	P	chr6	RP1-67M12.1	TTGAGTCTCATTTTGTTTCCCTCTGGAAACCACATGTGTACCTTGTTTGCAACAGTATGG	327	ENST00000444265	Ensembl	+	22111157	22056774	noncoding
ASHG19A3A029517	35.1831	49.1724	39.7767	106.635	108.603	109.113	122.608	5.2957	5.78457	5.51426	6.62773	6.72439	6.69937	6.78487	P	P	P	P	P	P	P	chr1	RP1-224A6.3	GATGCCGCTTGAGTCCCAGAGCAACTCCAATTTCATAGGCACATAAATTTATGTGAAAGT	615	ENST00000455966	Ensembl	-	22351461	22350486	noncoding
ASHG19A3A032065	3897.29	3977.63	3468.72	1657.06	3567.98	3049.52	4134.86	11.7606	11.8015	11.6659	10.7901	11.9408	11.6913	12.0562	P	P	P	P	P	P	P	chr6	RP11-102N11.1	AACCTCCCCCTTATAAATAAGAAGAGTCATTCAGAAATAGAGTGTTGCAATGAAGTCCCT	335	ENST00000454262	Ensembl	+	131018923	131018456	noncoding
ASHG19A3A030370	11.0378	21.2328	14.1882	57.595	37.6043	53.0083	26.82	3.65464	4.6804	4.08917	5.70186	5.13913	5.6324	4.48349	A	A	A	P	M	P	P	chr1	RP11-403I13.2	CCTAGACCCCGAGATTCCTTTCACCCGGGAAATCTCTTAATCGCATCCTTTGTCATTTTG	905	ENST00000421174	Ensembl	+	149187373	149186302	noncoding
ASHG19A3A013311	122.567	159.052	140.536	246.783	191.633	232.16	148.22	7.03431	7.38227	7.25327	7.89627	7.58126	7.84278	7.07485	P	P	P	P	P	P	P	chr2	AC010145.4	ATGCCTCTCAAGGCTCCTTTTCCTCCTTACAAACAAAATAAAACAAATCCTTCCTATGGA	517	ENST00000422415	Ensembl	-	16203007	16137170	noncoding
ASHG19A3A042655	90.9188	86.5039	106.502	134.732	121.855	144.771	136.255	6.62185	6.54845	6.87449	6.97509	6.89902	7.12669	6.94321	P	P	P	P	P	P	P	chr10	AK123067	ACCTTGGAGTCTCCAGTTCACTGAAACCTGTCACTGCCACCCAGTGGCCACCATGACAAG	1298	uc001jah.1	UCSC_knowngene	-	43187207	43169007	noncoding
ASHG19A3A042868	13.4437	12.1865	15.9752	19.3548	20.2377	20.2446	27.3483	3.92479	4.00304	4.26064	4.05222	4.21387	4.1815	4.5124	A	A	A	P	P	P	P	chr10	RP11-179K3.2	GAAGACCAACAAGATCAGAACAGAAACCCTCAGGCTACAAATACATGGAAATAGCAAATA	581	ENST00000425902	Ensembl	-	66684276	66662884	noncoding
ASHG19A3A042591	97.4472	102.931	105.589	81.0401	39.5613	90.1731	92.5414	6.72336	6.79222	6.8625	6.22637	5.21403	6.41603	6.35339	P	P	P	P	P	P	P	chr10	RP11-472N13.3	ATAAGTGTTCCAATGGTTTTATTTGGGGAAAGCCAACGCTTTCCCCAAAAAGACTTTTTC	347	ENST00000433770	Ensembl	-	31996316	31982011	noncoding
ASHG19A3A008045	22.2044	7.32356	16.597	28.1955	56.8	26.5214	15.1104	4.63607	3.44059	4.31138	4.62979	5.7592	4.59232	3.57453	A	P	A	A	P	P	P	chr17	AC004448.5	CGTCCCTTTGGGCCCTGAGGAATAATACTGCTGGTTTAATTCAAGATATAAAACCAATAA	441	ENST00000456537	Ensembl	-	19364048	19342455	noncoding
ASHG19A3A017120	64.8316	55.7866	66.4864	136.163	131.737	120.833	153.689	6.14762	5.95531	6.21953	6.98865	7.01795	6.8567	7.12936	P	P	P	P	P	P	P	chr1	RP11-422P22.1	AAAGCCCTTCCTTAAATCCTTTAAAGCCTAGGCTTAGGGGATTGGGCTCCTGCTTTAAGA	491	ENST00000420211	Ensembl	+	18715008	18712322	noncoding
ASHG19A3A041434	22.7751	38.0279	23.9303	55.0671	52.4787	58.6086	85.374	4.6778	5.44436	4.80687	5.63631	5.63657	5.77838	6.23724	P	P	P	P	P	P	P	chrX	RP1-241P17.1	GTGACATGTAAAAACCCAATTCCCGTAACAGCTTTCCCAACGTTGATTTTTTAGACATGA	444	ENST00000451869	Ensembl	+	114959381	114957296	noncoding
ASHG19A3A051145	46.689	36.5179	55.5021	63.2678	68.703	75.5806	75.86	5.68759	5.39072	5.97175	5.84654	6.04698	6.15703	6.06182	P	P	P	P	P	P	P	chr14	AL132709.1	AAGTCCTCCGACTCTGAAGGCCATACCCAACAGGTCCCATTTTATTTGTTTTACTTTTTT	520	ENST00000448840	Ensembl	-	101544008	101540300	noncoding
ASHG19A3A038183	9.48433	5.24837	9.5317	17.2599	16.05	21.04	20.7498	3.44866	2.33192	3.55555	3.87262	3.84863	4.23937	4.08245	A	A	A	P	P	P	P	chr9	RP11-145E17.2	GGGCTCACTGGAGTGCAAACTGCTTTCACTTGTTTGAAATGGAAATTTTTTCGTCTCTTT	743	ENST00000417135	Ensembl	-	137187243	137185776	noncoding
ASHG19A3A019071	145.7	129.055	140.531	551.593	557.935	532.695	583.443	7.26332	7.10114	7.25301	9.13831	9.20244	9.1007	9.1598	P	P	P	M	M	M	P	chr21	AP000473.5	TCTGGGAAAAGTCTGCAAAGCTAGTTAGGACATTCAGAAATTCATTTCATTTCAATCCTA	550	ENST00000413645	Ensembl	+	18012952	18003145	noncoding
ASHG19A3A049414	371.143	359.372	397.849	1546.87	1356.42	1420.38	1593.43	8.53711	8.48586	8.67197	10.695	10.5373	10.5772	10.6745	P	P	P	P	P	P	P	chr13	RP11-380B4.2	TGAAAGTGGACATTTTTGCCTTGACAACTCCATCTGCTCCTCCTCTATGAAAGCTCCATC	903	ENST00000421002	Ensembl	-	33485788	33451568	noncoding
ASHG19A3A014122	154.179	173.684	174.856	39.4971	45.3863	35.3253	42.6249	7.34198	7.50273	7.54865	5.13657	5.42359	5.02166	5.197	P	P	P	P	P	P	P	chr2	AC073987.1	CTGCTGCCTAATTTGTGAAAGTTTACACAACCTTTCTACGTGAAGAATATTGCAACTTTA	638	ENST00000422683	Ensembl	-	103792718	103726216	noncoding
ASHG19A3A038921	8.10181	5.22359	11.358	26.7314	24.1604	26.1551	30.0532	3.22611	2.33094	3.79206	4.55123	4.47214	4.57058	4.66081	A	A	A	P	P	P	P	chr9	AK095132	ATGGGCCATGATTTACCTGAATTCTCACAGTGGCTTAGACAATGGAGACCTTGTCCACAA	2745	uc004are.1	UCSC_knowngene	+	93927858	93922050	noncoding
ASHG19A3A040030	73.8268	68.0954	76.2887	42.8999	87.2566	101.568	126.659	6.33973	6.2243	6.41176	5.25808	6.39622	6.59279	6.82767	P	P	P	P	P	P	P	chr1	NCRNA00210	ATTAAATAGTGATGCTACCCAAATCCAGGCTTGTCCTGTGCTTGATGGCTGCTGCTATTG	1586	ENST00000431637	Ensembl	+	218094146	218066242	noncoding
ASHG19A3A039837	26.0629	49.5363	24.9661	95.7159	28.5661	70.7305	41.1434	4.87596	5.79488	4.86764	6.47154	4.72928	6.06645	5.14337	P	P	P	P	P	P	P	chr1	RP11-323I1.1	TTAAGAGTCTCCAGTGCTTGTTAGGAAAGTGTGGAAGATGAACCCCTTCTTCATCCACAG	347	ENST00000456240	Ensembl	+	213967930	213904758	noncoding
ASHG19A3A012617	20.6845	26.4952	22.0061	62.0996	33.4163	54.413	43.3648	4.53509	4.9645	4.69457	5.81851	4.95887	5.67149	5.22247	A	P	P	P	P	P	P	chr19	AC012309.5	CACCTCTCAAGATCATTAGGAGCTTCTTTTCCAATTCCTCTGTTTTGCATGCATTGGAAG	462	ENST00000438770	Ensembl	+	37747421	37742827	noncoding
ASHG19A3A040180	682.913	788.369	706.089	1001.58	414.371	875.406	421.929	9.34561	9.53582	9.43844	10.0421	8.7419	9.84307	8.65538	P	P	P	P	P	P	P	chrX	RP3-341D10.4	GAAAGTTTTAAAATCTTTTTCTCCAACTTGGGCAATATGGCAAAACCCTATCTCCACAAA	3216	ENST00000456301	Ensembl	-	100262962	100258820	noncoding
ASHG19A3A018479	81.1838	90.2631	85.1505	148.961	140.578	141.581	180.714	6.47283	6.61017	6.57086	7.12482	7.1168	7.09033	7.36983	P	P	P	P	P	P	P	chr20	RP5-843L14.1	TTCTCTTGTGCCCCAATTACCACATGCGTCATGGGGAGAAGAGCTTGAACCCCCCAGAGG	298	ENST00000437350	Ensembl	+	55173677	55171365	noncoding
ASHG19A3A044506	70.139	72.0116	62.8273	75.8736	71.2305	274.27	81.8034	6.26545	6.30031	6.14453	6.12284	6.09562	8.10047	6.17488	P	P	P	P	P	P	P	chr1	AK054708	ATTTATAAAATGCCGTGATTCAGGTCTCAGGGCACTGTCGCCCCTACTCACTTTGATGAA	1954	uc001aio.1	UCSC_knowngene	-	1946969	1944651	noncoding
ASHG19A3A007100	900.074	868.762	884.228	341.893	526.19	572.432	602.842	9.71247	9.67439	9.74654	8.39779	9.12031	9.21403	9.20636	P	P	P	P	P	M	P	chr22	TUG1	AAACTGAGGATGCTCCATCCAAAGTGAATTATGTCCTGTGCCTCCTGATTGCTGAGTGTT	7115	NR_002323	RefSeq_NR	+	31375377	31365633	noncoding
ASHG19A3A019299	37.6978	102.491	51.0136	390.925	155.431	342.215	155.694	5.38591	6.78629	5.85745	8.5975	7.26695	8.42044	7.14708	P	P	P	P	P	P	P	chr1	LOC284551	TATAGTCACTTCCAATATCATGTGTTTCAACAAGCCCGTGTTCCTTCCTGGTCAGTTCCC	2741	NR_027085	RefSeq_NR	+	31989846	31984035	noncoding
ASHG19A3A014148	64.6828	89.4393	73.8978	120.165	48.9658	113.548	58.7546	6.14496	6.59801	6.36932	6.80424	5.53228	6.75652	5.67733	P	P	P	P	P	P	P	chr2	AC009505.4	TAACACACCGCTAAGAAAAAGACTTGTTCTGAGAGTGAGGACTGCCCCCGGATTTTGTAA	424	ENST00000413151	Ensembl	-	106578462	106575539	noncoding
ASHG19A3A043721	84.8568	58.9536	78.9786	130.821	208.81	102.401	136.625	6.52958	6.02721	6.46288	6.92937	7.71063	6.60538	6.95088	P	P	P	P	P	P	P	chr10	RP11-307B23.1	ATTTCTGGCATCTCTTTCCACAGCACAGGCAGCCTTGCAGAATGAAAAGTATTTCTCCCA	441	ENST00000450270	Ensembl	+	25971574	25940703	noncoding
ASHG19A3A038044	15.3842	7.63702	12.3291	15.1851	34.8701	16.2086	22.433	4.11166	3.486	3.8999	3.67028	5.02576	3.83069	4.20759	A	A	A	P	P	P	P	chr9	BC031239	TAAAGTGGCTGTCTTGTGGGAGAGGAAACTGAAGACATAGTGGAGACTATTGTTTTTGTT	2096	uc004bqf.1	UCSC_knowngene	-	129038194	129032402	noncoding
ASHG19A3A030424	6168.77	5984.97	6149.32	486.543	437.856	465.087	486.079	12.4149	12.3916	12.4677	8.94369	8.831	8.89217	8.87997	P	P	P	P	P	P	P	chr1	FCGR1C	TACTAAATACTAACTGCTAGAAGAGAAGACTCTGGGTTATACTGGTGCGAGGCTGCCACA	1338	NR_027484	RefSeq_NR	+	149378295	149369293	noncoding
ASHG19A3A043209	18.481	48.0767	20.1604	19.4367	23.2611	27.7623	21.8776	4.37278	5.75721	4.5797	4.05695	4.4148	4.66145	4.17142	P	P	P	P	P	P	P	chr1	RP11-34P13.13	ATGCCAGGTGCATCTGTGGACAGGGGCCATGCCCCTGGGCTTCCAAAGTTGGAGAGAGCT	972	ENST00000466557	Ensembl	-	173864	164404	noncoding
ASHG19A3A013235	44.0285	31.6484	42.5386	51.4379	49.0786	66.2332	70.7425	5.60495	5.19813	5.6087	5.54011	5.53631	5.96713	5.95324	P	P	P	P	P	P	P	chr2	AC107057.1	GAATGCATTTGGAGTAGGTGATGTTTAATGATCCTTTCTGTTCTCAATTCCTGTAATACA	319	ENST00000425763	Ensembl	-	5696163	5689911	noncoding
ASHG19A3A039563	22.8179	24.2963	23.4506	54.1974	54.7273	65.6513	66.0369	4.6804	4.85125	4.78017	5.61449	5.70295	5.95368	5.85148	A	P	P	P	P	P	P	chrX	RP11-1M18.1	TAGAGATTAACCCTTTCCTGGAAAATGAACGTCTATTGCTTCTTTTGGGGACAGCATGCT	517	ENST00000438499	Ensembl	-	6639585	6585905	noncoding
ASHG19A3A019932	152.648	150.52	163.942	423.687	352.539	663.872	428.627	7.32978	7.3061	7.45714	8.72194	8.49736	9.43474	8.67996	P	P	P	P	P	P	P	chr22	LOC100271722	ACCCATGAGGTAATTACTGAATGCATTTGGTTGAAAGTCCTTCTGCTATATTTTCCAAAC	1625	NR_027036	RefSeq_NR	-	46440748	46435788	noncoding
ASHG19A3A008236	13.0958	39.265	19.2596	21.3412	17.9918	13.1113	26.5672	3.89093	5.48619	4.51675	4.20085	4.029	3.48057	4.46916	P	A	P	P	P	A	P	chr17	AC091199.1	ACTGGATAAAATCATGGCTTGTCTCTTTGAGGGAAAGAGGTTGATTGGGTTTGGTGTGGA	478	ENST00000420946	Ensembl	-	36162759	36158868	noncoding
ASHG19A3A019258	30.5956	25.9504	44.3277	24.7567	49.2681	64.5807	78.3049	5.09499	4.9355	5.66649	4.43055	5.54175	5.92869	6.10774	P	P	P	P	P	P	P	chr21	AP001042.1	AGACTTGGGCAAACTCTACTCCTCAATTTGTGGAAAAATCTCAGTATTGATCTATGCATG	487	ENST00000416842	Ensembl	+	40220568	40218170	noncoding
ASHG19A3A039227	38.3477	85.3535	42.5604	22.5135	26.8618	32.323	32.1511	5.40941	6.53242	5.60978	4.28306	4.63106	4.8896	4.76754	P	P	P	P	P	P	P	chr9	RP11-10J18.3	AAGATTACTGAGACGACATGCGTGAAGCACCAATTACGGCGCCTGGACTCACGAGGCGGT	266	ENST00000369027	Ensembl	+	127278335	127277216	noncoding
ASHG19A3A038559	6233.42	5564.92	3293.98	5104.88	4837.26	4846.4	5250.89	12.4268	12.2849	11.5868	12.4484	12.3851	12.3628	12.409	P	P	P	P	M	P	P	chr9	RP11-220I1.1	GGATCTCAAATGTGGGAAGGATTGTTATATAAGACAACCAAATGATGACATGAGACAATA	4375	ENST00000429493	Ensembl	+	37090398	37079892	noncoding
ASHG19A3A024207	19.2021	28.8562	23.3813	84.0841	52.3349	62.8565	42.4854	4.43155	5.07714	4.77699	6.28052	5.63286	5.88698	5.19296	P	P	P	P	P	P	P	chr1	RP11-424D14.1	GGATCACAGAAAACACCCCTACACCAACTTATAGCCAATCTATTCAACCTGCATTGTTAG	627	ENST00000425517	Ensembl	+	69650686	69521580	noncoding
ASHG19A3A029496	48.8475	85.8428	75.0463	257.119	205.096	223.534	157.843	5.75382	6.53897	6.38924	7.96222	7.68519	7.78512	7.16545	P	P	P	P	P	P	P	chr6	AL160400.1	ACTTAACTTCCAGGATAGCTGCAAGACCCTTTTGTTCCTTTGCCATGAGCAGGTTTTAGG	1029	ENST00000510784	Ensembl	-	25042398	25015180	noncoding
ASHG19A3A050871	48.9873	54.789	39.7707	28.4495	70.0856	79.0096	92.9485	5.7575	5.92898	5.51407	4.6448	6.0748	6.21984	6.36027	P	P	P	P	P	P	P	chr1	BX004987.7	CCACAGTGGATTAGTGGATATTACAAAACCTCTGGTCCCACCTCATTAAGATGGAAAAAA	964	ENST00000418607	Ensembl	-	143533272	143527404	noncoding
ASHG19A3A035290	164.751	182.252	131.043	358.252	151.578	325.517	151.033	7.4371	7.56695	7.15957	8.46982	7.22875	8.35179	7.10114	P	P	P	P	P	P	P	chr7	AC004941.3	TTCTGTGCCAATCTTTATTGCCTGAGTCCCCCAGCACCCAGACTGCTGAAATTAAAAGAT	3120	ENST00000417506	Ensembl	+	149098547	149095294	noncoding
ASHG19A3A031190	1138.33	1493.18	1102.71	1721.78	950.365	1511.8	1033.49	10.0321	10.4064	10.047	10.8477	10.0093	10.665	10.0341	P	P	P	P	P	P	P	chr6	HCG14	ATGTTTACTGAAATCTTGATCGTGGTTAGCCTCCCCCAGGACTTCATTGTTTGGAAGATG	413	ENST00000444986	Ensembl	+	28865099	28864306	noncoding
ASHG19A3A017828	50.2019	37.6749	37.9722	53.738	67.094	63.1651	87.3313	5.78805	5.43173	5.45263	5.60238	6.01193	5.89457	6.26889	P	P	P	P	P	P	P	chr20	RP5-897D18.1	TTCTCTACTGAGAGTCTTACAGACATTTTCTCCAGCCATCAGTATCCACAAAGGTCCGGT	483	ENST00000458293	Ensembl	-	55306516	55305452	noncoding
ASHG19A3A050860	39.2771	24.9033	34.8504	52.8253	44.3685	49.1881	55.4277	5.44318	4.88321	5.32849	5.57803	5.386	5.51959	5.59147	A	P	P	P	P	P	P	chr1	BX004987.4	GGGGGGCCAGACCAGTGTTCCCCATTTGTGGGGGCAGACGCGTGGGCGCATCGCGGGCAG	681	ENST00000443548	Ensembl	-	143467532	143356064	noncoding
ASHG19A3A019498	53.6983	67.5373	50.7114	114.205	97.9596	106.393	123.324	5.88405	6.21269	5.8488	6.72565	6.56808	6.66376	6.79288	P	P	P	P	P	P	P	chr22	AC011718.2	ATCATTCCAGACATACATGCAGATGTTGGAACTCCCTTGCACAGTGACTCATGATCCCAA	727	ENST00000412656	Ensembl	-	20661407	20640967	noncoding
ASHG19A3A043746	51.6116	123.914	38.2896	20.5456	31.1797	33.639	31.539	5.82667	7.04418	5.46316	4.14266	4.86037	4.94783	4.73793	P	P	P	P	P	P	P	chr10	RP11-478H13.1	AAGGAGAAAAGAAAAGAACAAAATCCACCGGGAACCAGAGACTTCCAGGCTCCAAAGACA	517	ENST00000456082	Ensembl	+	29033592	29032673	noncoding
ASHG19A3A050126	37.2458	54.5166	34.7214	118.955	45.9246	112.263	42.9749	5.36929	5.92188	5.32277	6.78698	5.44059	6.7385	5.2085	P	P	P	P	P	P	P	chr13	RP11-442J21.1	TCAGGACAAAGCCAGCTCTGTCTCCTGTACCAACCTTGCATGAAAAACAACCAAGGAAAT	295	ENST00000426509	Ensembl	+	45275152	45225947	noncoding
ASHG19A3A017186	19.2321	22.6295	18.1565	30.5798	19.2292	20.5103	21.3711	4.43358	4.75784	4.42933	4.75369	4.1379	4.20015	4.13133	A	A	P	P	M	P	P	chr2	AC079612.2	GTGATTCATAACCAAAGCAGGGCTCCCACAGCGACGCTGAGCAGACACAGAACTATTTTT	348	ENST00000446029	Ensembl	+	240552533	240547391	noncoding
ASHG19A3A031944	953.058	962.313	951.983	426.877	562.043	537.611	617.202	9.79841	9.81	9.84541	8.73264	9.2129	9.11444	9.24351	P	P	P	P	P	P	P	chr6	RP5-1112D6.4	TTAGAAAAGGAAAAGTTTACCTGCAAAGAGAGCAAGAGAATGACTGGCTTGCCTAATAAA	557	ENST00000444259	Ensembl	+	111599945	111599134	noncoding
ASHG19A3A032137	223.12	197.493	194.834	91.7309	184.769	203.39	236.779	7.846	7.6764	7.69757	6.41055	7.5265	7.63894	7.78241	P	P	P	P	P	P	P	chr6	BC038188	GCTTTCTCTCTCTCCATGCTCAGGTACTGAGGAAAGATCATATGAGCACACAGCAAAAAG	1351	uc003qis.2	UCSC_knowngene	+	140414856	140297466	noncoding
ASHG19A3A042680	51.9679	92.3341	67.2985	154.73	93.792	120.939	88.0454	5.83713	6.64608	6.23788	7.18375	6.50911	6.85776	6.28091	P	P	P	P	M	M	P	chr10	RP11-20J15.2	TAAGGAGACCAAGACATTGTGAAAACCAAGTGTCTCCCACCTTGCCAGGACCTATAAAGT	841	ENST00000437014	Ensembl	-	44757261	44755049	noncoding
ASHG19A3A042545	14.8356	8.99714	14.1187	15.7809	24.2851	24.8488	35.6681	4.06437	3.6567	4.08245	3.73272	4.47847	4.49478	4.92753	A	A	A	P	P	P	P	chr10	C10orf52	TGCCCTGTCTGATTCAGGAGACATGACTAGCAGCACATCGGCACCAGAAGACGCCAGAAG	645	ENST00000433966	Ensembl	-	27233347	27232251	noncoding
ASHG19A3A038558	1337.88	1241.41	1308.22	728.418	1126.34	1141.98	1228.13	10.2564	10.1597	10.2784	9.55619	10.2547	10.2579	10.2987	P	P	P	P	P	P	P	chr9	BC067112	AAACAGCATCCACAGCTATTTTGTGTTGTTTCCCTGACCCCACCCTGAAGAAAAGAAAAA	1868	uc003zzp.1	UCSC_knowngene	+	37087992	37079993	noncoding
ASHG19A3A011351	18.1224	29.1925	17.6896	83.5081	46.3211	69.9708	21.8882	4.34537	5.09176	4.39388	6.26965	5.45209	6.05085	4.17205	P	A	P	P	M	P	M	chr19	AC002511.3	AGGCATCCTCTGTCAAGACCATCTGCGCATGTGCTGTGCAGTCTCCAGTCTGCACTGTGA	376	ENST00000428426	Ensembl	-	35924720	35923858	noncoding
ASHG19A3A009075	60.0981	48.6101	55.9354	33.2233	61.5208	60.6645	82.3278	6.03709	5.76939	5.98332	4.87425	5.8813	5.82983	6.18295	P	P	P	P	P	P	P	chr1	RP11-541F9.1	GATGTTCTTTTTCTTTCCCCCGGCCAGGGATCTGAAACTAACTCGGACTTACTTGAAAAG	583	ENST00000428569	Ensembl	-	191859359	191827892	noncoding
ASHG19A3A019728	15.2812	12.6174	20.4991	16.2888	25.6952	28.0213	43.2616	4.10259	4.04354	4.60137	3.78056	4.56177	4.67412	5.21931	A	A	P	P	P	P	P	chr22	RP1-302D9.1	GCGGGTGGGCCCCGCTGTAAGAAAGCCTGCCATTTGGAAATGAGAATTAGAGCAAAAGGA	437	ENST00000447396	Ensembl	-	33502045	33501368	noncoding
ASHG19A3A017480	22.6586	27.143	24.721	45.996	49.6681	44.9156	40.8612	4.66973	4.99755	4.85372	5.36686	5.55566	5.38532	5.13369	A	P	P	P	P	P	P	chr20	RP11-218C14.5	CGGGGTAAGATTTTGATTCCCACCACTGATCATATCATTAAAAAGTGTATTCTCTGCACT	436	ENST00000450971	Ensembl	-	23637027	23635861	noncoding
ASHG19A3A013035	150.637	175.165	161.146	124.402	90.2043	108.667	81.3295	7.31041	7.5141	7.43486	6.85966	6.44625	6.69433	6.16778	P	P	P	P	P	P	P	chr19	AC006293.3	GTGCCTGTAGAGAACGCTTCCTCCATTAAACTTCCATTAAATGGCAGTGCTTTCAGTCCA	2127	ENST00000413439	Ensembl	+	55224955	55219699	noncoding
ASHG19A3A043462	8.35144	7.54341	5	16.6072	21.2754	21.9891	24.6327	3.26698	3.47373	2.39437	3.81222	4.2882	4.30738	4.35791	A	A	A	P	P	P	P	chr10	AF086154	CACTCCAAGGACCACGGCCTGGACATGAGCGGCAGCGGTGAGCTGGGAGCTGCTGGCCTG	632	uc001lln.2	UCSC_knowngene	-	134331695	134325131	noncoding
ASHG19A3A043771	54.7563	44.5489	43.2076	73.866	81.1783	81.1744	81.3935	5.91225	5.65433	5.63	6.08288	6.29286	6.25934	6.16935	P	P	P	P	P	P	P	chr10	RP11-472N13.2	CCATGGTTGGACTCCTAAAATACTCAAGATGAGAGACATGTTACTTTTCTTTACTATAGT	421	ENST00000420945	Ensembl	+	31895146	31893527	noncoding
ASHG19A3A007950	687.092	671.046	658.137	3168.53	3394	3446.13	3615.88	9.35522	9.32169	9.34339	11.7402	11.8726	11.8647	11.8726	P	P	P	P	P	P	P	chr17	AK123263	GGCAGAATATTTTGTTCCTTTATGGGTCAGCCTGGGATACAAAATTAGAGAAACTTTGCA	2800	uc002goc.1	UCSC_knowngene	-	13695867	13680148	noncoding
ASHG19A3A055162	136.682	146.831	141.722	98.4314	169.113	186.337	198.879	7.18211	7.27447	7.26624	6.50976	7.39573	7.50917	7.5162	P	P	P	P	P	P	P	chr2	LOC285045	GCTCCTGACCCATGCTGGGCCCTCAACTTAATTGCTGCCTAGAGCTCATAGAAGGATCTC	868	uc002rop.1	UCSC_knowngene	+	33162270	33066079	noncoding
ASHG19A3A016447	63.574	92.1735	77.5353	172.09	161.009	174.221	83.8874	6.11702	6.64274	6.43504	7.34705	7.32204	7.40747	6.21242	P	P	P	P	P	P	P	chr2	AC062031.1	TAGAACTCTCACATTTGTTTTGCTGGTTCACTCTGCCCGTGTTCTACAAAAGCCCCAGTT	747	ENST00000414967	Ensembl	+	146688714	146672657	noncoding
ASHG19A3A032310	215.056	218.226	232.327	296.352	210.602	265.134	317.912	7.79396	7.81269	7.92222	8.17474	7.72496	8.04392	8.23086	P	P	P	P	P	P	P	chr6	RP1-230L10.1	GTTGTTTCCAATAGTTGACTAGTTTTCTTCCCCAGCACTTACGAGTACACAGCCAGTCAC	719	ENST00000452944	Ensembl	+	164180873	164124935	noncoding
ASHG19A3A020113	105.264	102.589	106.497	196.839	181.938	171.008	187.262	6.82589	6.78774	6.87441	7.54978	7.50132	7.37838	7.4207	P	P	P	P	P	P	P	chr22	AC023490.2	ACGTGCAGGAGATGGGAGGGCCTGTCTCTTGGTTCCTCTCGGAAGTCCTGCCCTTGTCCT	853	ENST00000426653	Ensembl	+	20378803	20377668	noncoding
ASHG19A3A015540	15.68	12.4136	12.5723	22.3959	27.3874	23.0258	30.198	4.13648	4.02352	3.92648	4.2741	4.66221	4.37963	4.66746	A	A	A	P	P	P	P	chr2	AC093822.1	ATGTACACTATGAATGCCAAGTGCTGTGAATACCAACCCATGCTTTCAAAGAGCCTGCTG	380	ENST00000457385	Ensembl	+	38660715	38658435	noncoding
ASHG19A3A037200	105.108	97.1082	120.563	76.5221	138.391	136.076	131.307	6.82418	6.71395	7.04269	6.13606	7.09227	7.03127	6.88328	P	P	P	P	P	P	P	chr9	RP11-408N14.1	TTCTACGTGTTTGTGTCTTAGATCTGTTAAACTCAGCTGACCCACCACACCCAAGCAGAA	443	ENST00000435092	Ensembl	-	22214671	22203988	noncoding
ASHG19A3A030625	5	5.03577	5	26.2119	17.3387	24.4354	42.1333	2.37766	2.3234	2.39437	4.52034	3.97149	4.47031	5.17826	A	A	A	P	P	P	P	chr6	RP3-460G2.2	CTTGTAATACTTTGTTCAAGTTCTGATCAGAAGGATGAATGATGGAGCCCAAGAAGCCAG	453	ENST00000455011	Ensembl	-	141174061	141167094	noncoding
ASHG19A3A018011	28.8858	28.5314	37.356	14.0134	24.3827	27.212	20.9938	5.01622	5.06259	5.42871	3.53604	4.4851	4.6309	4.10033	P	P	P	P	P	P	A	chr20	RP5-1164C1.2	AGCTGAGACCACAGGTAGTTGGTCAGACTCTATACTGCAGGAGGTACCCTGTGCACATGA	168	ENST00000419863	Ensembl	+	4505846	4456284	noncoding
ASHG19A3A008245	193.33	198.656	159.294	377.277	376.556	396.046	369.397	7.6561	7.68421	7.41938	8.54505	8.59633	8.64358	8.45359	P	P	P	P	P	P	P	chr1	RP11-318C24.2	CCTGGCTGTTCTGTTCATGACGGTGGTTATTCCAATTACTTTGAGAATTATATTTATTAG	657	ENST00000426575	Ensembl	-	175889649	175873897	noncoding
ASHG19A3A042412	17.1966	10.7214	21.4955	21.3269	20.0858	24.0936	15.7771	4.26427	3.84909	4.66204	4.19897	4.20152	4.45046	3.64908	A	A	P	A	P	P	P	chr10	RP5-1031D4.2	TTTGTAAAATGTTGGCTGACGGCTAAGGGTGTTTATTCCTCTAAAATCACCTAATTAGAA	557	ENST00000420395	Ensembl	-	7513904	7487519	noncoding
ASHG19A3A016127	29.5228	39.4012	35.902	359.548	253.934	224.421	125.426	5.04675	5.49083	5.37335	8.47512	8.02189	7.78913	6.81474	P	P	P	P	P	P	P	chr2	AC096669.3	ATTTTCTAGGTTTGGGACCTCTGCGTACCTCCTGTGGCTTTATGGTACCTGGTATTGTTT	1539	ENST00000443205	Ensembl	+	108172782	108145942	noncoding
ASHG19A3A039410	8.54351	19.4272	12.3817	50.2753	37.5279	38.1075	21.424	3.30174	4.57097	3.90364	5.50529	5.13613	5.13743	4.13577	A	A	A	P	P	P	P	chr9	RP11-54A22.2	ATTCTGCCTCATTTTCCTTGGCGCGAGGCGTGGGTTTTCCTAAGCCGAGAGGTGAGACGT	599	ENST00000454160	Ensembl	+	137521252	137519675	noncoding
ASHG19A3A055143	62.5634	51.0126	56.7848	98.4022	68.3621	71.1225	89.9187	6.09471	5.83707	6.00516	6.50928	6.03961	6.0748	6.31219	P	P	P	P	P	P	P	chr17	AK000477	CACAGTTGTATGCCATCATGCCCAGACCAGATTTCGCCATATTGCTCAGGATGGTCTTGA	1697	uc002jix.2	UCSC_knowngene	-	70588943	70380461	noncoding
ASHG19A3A044648	106.034	89.7077	111.825	169.146	126.457	148.284	186.498	6.83548	6.60269	6.94229	7.3232	6.95819	7.16366	7.4159	P	P	P	P	P	P	P	chr10	RP11-442O18.2	TAAGAAACTCTTATGAAGTTGTCGGGGTTCAAGTTGGCCTTCCTGTTGTTCAACCTGGTG	450	ENST00000446589	Ensembl	+	130714535	130711142	noncoding
ASHG19A3A044276	21.9407	24.6932	18.8347	51.1263	41.2844	48.8554	72.528	4.61986	4.8713	4.48445	5.53311	5.28001	5.50893	5.99009	A	P	P	P	P	P	P	chr10	BC035398	AGGGCAGTGTGACTCAGCTAGAAAAGGATGAACTTTCCCCAAAGATAAAGTGACCTATGC	4272	uc001kgv.1	UCSC_knowngene	+	91600618	91589266	noncoding
ASHG19A3A009363	97.7713	91.4507	96.588	7.91142	8.90035	13.9292	11.2674	6.7269	6.63137	6.73955	2.7168	2.9503	3.58006	3.10562	P	P	P	A	A	P	A	chr1	EF413001	AGGGATTACCCAGAAGAAAAGAAGGTAAGCTATTTCATCAGTTTTGGTGGAAATCAGAAG	2280	uc001guz.2	UCSC_knowngene	-	198906558	198867622	noncoding
ASHG19A3A036889	3551.1	4216.43	2527.05	3248.97	3870.96	3536.26	1400.45	11.6252	11.89	11.2139	11.773	12.0682	11.9	10.4847	P	P	P	P	P	P	P	chr1	RP11-309H21.2	ACTCTTTCCCCTCCCATTTACTTGATTTACTTGTTCTCCAGGAAAAGGCAACATGAACTC	299	ENST00000434983	Ensembl	+	191197597	191190288	noncoding
ASHG19A3A031860	12.0292	23.6204	19.6932	57.1321	55.9694	51.633	32.6399	3.76662	4.81554	4.54742	5.68844	5.73658	5.59025	4.7897	A	A	P	P	P	P	P	chr6	RP11-436D23.1	GTCGCTTCTTAGGCTTCCTGCCAGATTTTGAAAACCACTATAACTAGTCGTTTCTGCCAA	226	ENST00000439279	Ensembl	+	98727735	98723021	noncoding
ASHG19A3A048738	41.7858	40.4824	52.7661	51.9088	57.8012	60.0258	66.1881	5.52849	5.52493	5.90211	5.55371	5.78902	5.81372	5.85527	P	P	P	P	P	P	P	chr1	RP11-206L10.5	TTTCTACTAATGGAATTCCTGGCCTTGAGAGGATGTTACTTTAGAAGGAAAGGATTTTTT	295	ENST00000417659	Ensembl	-	700305	694411	noncoding
ASHG19A3A018697	17.6173	18.054	22.7996	113.872	128.168	126.898	150.561	4.30246	4.47926	4.7406	6.72063	6.97832	6.92937	7.09612	A	P	P	P	P	P	P	chr21	AP000146.2	CACACTCCTTTACTACAACAATTCGGGAAACTAAATTTTCAATGATGGAAGGAATGGTTA	309	ENST00000444178	Ensembl	-	26365129	26310744	noncoding
ASHG19A3A039137	306.807	396.113	392.626	553.757	481.103	462.497	223.858	8.27422	8.6208	8.65381	9.14521	8.97798	8.88471	7.69235	P	P	P	P	P	P	P	chr9	RP11-168K11.3	TGAATGTCCCCCAAGCTGCTTAGCCCTTGTGTCTGCTTTTAAAAGTTCTGCTTTGCTTCT	3043	ENST00000437712	Ensembl	+	116384914	116381507	noncoding
ASHG19A3A031861	42.9455	33.271	54.1287	63.2964	52.4797	59.2342	73.0208	5.56837	5.26746	5.93677	5.84706	5.63674	5.79339	5.99917	P	P	P	P	P	P	P	chr6	RP3-453D15.1	GGAGTTGGTTTTTACTCCCAAGCCCTTTGCTACTTAAATAAAGTTATTGGCTGCCTAATG	138	ENST00000424521	Ensembl	+	99006447	99006309	noncoding
ASHG19A3A018527	34.5729	36.7603	41.4193	63.0506	54.0944	60.845	73.8515	5.26841	5.39947	5.57069	5.8414	5.6856	5.83422	6.02006	P	P	P	P	P	P	P	chr20	RP5-827L5.1	TCAGAGCAAAATGGCCTGCTCTTCAATGTAGCTTAGTTTAGTTCAATTGTCCTGCCCACC	391	ENST00000441660	Ensembl	+	59655235	59654195	noncoding
ASHG19A3A019000	10.3668	10.9594	18.3104	15.3785	26.7933	22.0987	35.2209	3.57281	3.87648	4.442	3.69059	4.62647	4.31726	4.90672	A	A	P	P	P	P	P	chr21	C21orf111	TGGATTTTCTACAAACACAATGCACTTCCTGCCGTGCTTGTGTTGGGAAATCTGCCAGAA	455	ENST00000416722	Ensembl	-	46761905	46758504	noncoding
ASHG19A3A025658	6.66922	10.2583	7.04341	29.4434	31.9254	32.6609	32.2089	3.00549	3.80263	3.16732	4.69643	4.89221	4.90455	4.7694	A	A	A	P	P	P	P	chr1	RP11-413E1.3	GGGTGAACTGTATTCATCCAAGGCAGGAAAAGATTACCATACAAAATAAACTTTATAGGA	1835	ENST00000416805	Ensembl	+	90235462	90229103	noncoding
ASHG19A3A030601	94.2134	75.0947	68.0174	23.9271	25.1007	20.4372	17.8611	6.67641	6.35719	6.25157	4.37773	4.52756	4.19418	3.84909	P	P	P	P	P	P	P	chr6	RP11-10J5.1	CTCCATATGCAAACCCATGTAAAAAGAAACCTAGAGAAACAGATGCCCAGATGAAGAGGG	573	ENST00000417932	Ensembl	-	138266939	138264215	noncoding
ASHG19A3A032523	129.631	139.212	97.1069	347.247	328.995	293.897	88.4499	7.10814	7.20297	6.74756	8.42283	8.401	8.20546	6.28643	P	P	P	P	M	P	P	chr7	AC004543.2	TGATCATCATCCTCTCTTCTTCTCCACAAGCTCAAACACTTTCAGTGACTGATTTGAAAC	655	ENST00000418764	Ensembl	-	19871039	19853307	noncoding
ASHG19A3A043805	31.373	28.9585	27.5898	27.0804	30.1298	26.584	39.4046	5.12774	5.08156	5.00973	4.57185	4.80593	4.59512	5.07296	P	P	P	P	P	P	P	chr10	RP11-92J19.3	ATGGTGGTGTCTCGTCCATTCTTTCAGACACGTATTTCACATAAATGCACTAAATAAAAC	321	ENST00000418875	Ensembl	+	36731320	36727543	noncoding
ASHG19A3A044282	500.079	435.379	548	284.818	660.561	698.579	808.85	8.92646	8.74552	9.08848	8.11756	9.46449	9.51575	9.6539	P	P	P	P	P	P	P	chr10	RP11-236B18.2	TCTTTGCTTCTCACTTCCTGTGCCTTCTCCCAGAGAAACGGAGCTTTTGGAATTCTTTCA	380	ENST00000412362	Ensembl	+	92766147	92754376	noncoding
ASHG19A3A052674	23.7235	46.6053	37.6923	91.4349	79.0597	84.6279	43.0972	4.73656	5.71631	5.44227	6.4058	6.25358	6.31939	5.21269	P	P	P	P	P	P	P	chr15	AC009878.2	ATTAATAGCAGAGCCAGTCATGTCCTACCAGCATTCCTTTTATACAGGCTGGATATATGT	606	ENST00000451579	Ensembl	+	26691921	26640218	noncoding
ASHG19A3A019080	26.1724	24.0288	25.7397	30.9855	35.7923	33.0588	45.1299	4.88193	4.83799	4.91408	4.77236	5.06401	4.92119	5.28125	A	P	P	P	P	P	P	chr21	AF240627.2	ATGTCATCATGTCAGCGTATGCTAGGAAGGATTTGCTTAGACCCCGGTCCTTTTAGTATG	879	ENST00000416002	Ensembl	+	20022678	19986748	noncoding
ASHG19A3A015734	226.18	205.221	255.386	292.187	267.892	284.319	313.225	7.86294	7.72908	8.05439	8.1527	8.10031	8.15167	8.2097	P	P	P	P	P	P	P	chr2	BC041356	TTGGAGAAGACTGGAGCCAGCCTTGCCTTCTCCTCTCCTGAAGGAATGGATACATGAATG	1720	uc002sdd.2	UCSC_knowngene	+	64843614	64834494	noncoding
ASHG19A3A030936	21.5651	28.9304	25.7436	51.8061	58.0414	60.436	68.2054	4.5926	5.08044	4.91432	5.55017	5.7943	5.82406	5.90119	P	P	P	P	P	P	P	chr6	RP3-380B8.4	GCCCACACATAAGCTGAAGTATTGCCTTATGACATATTCTGAATATTCCAATTATTTTGC	412	ENST00000454882	Ensembl	+	5870453	5851738	noncoding
ASHG19A3A016428	20.8799	17.089	21.0774	21.6713	23.2042	24.3768	40.6598	4.54905	4.41275	4.63876	4.22248	4.41204	4.46698	5.12549	A	P	P	P	P	P	P	chr2	AC016710.1	CAGCTTCTCCATTGTTCTTGAGTATCATTTTTCAGGGCAATCATAAAAATGGGCAGGGCA	466	ENST00000421326	Ensembl	+	140235317	140227344	noncoding
ASHG19A3A032343	34.8297	49.8275	25.8625	56.5528	45.0492	45.953	24.1065	5.28073	5.80279	4.92151	5.67415	5.41086	5.41929	4.32168	P	P	P	P	P	P	P	chr6	RP11-503C24.1	AGTCATCCTCCAACACTATCACGTCGGCAACGCCTGGGTCTTGGAGGGGACACATTCGAA	449	ENST00000457340	Ensembl	+	168605181	168595037	noncoding
ASHG19A3A038307	350.306	360.481	357.714	713.639	599.022	595.329	751.256	8.45837	8.4924	8.52822	9.52329	9.31152	9.27056	9.54333	P	P	P	P	P	P	P	chr9	RP11-32F11.2	CAAACTACTTGATCACATTCCTCCTTTTGGTTTTGCTTCCTCTACCTGTCAGTTGTCCTG	886	ENST00000452746	Ensembl	+	3198517	3181588	noncoding
ASHG19A3A018543	20.8363	26.219	12.487	50.4873	45.0092	42.1964	57.3142	4.54673	4.94979	3.91662	5.51247	5.40931	5.29047	5.64241	P	P	A	P	P	P	P	chr20	RP13-30A9.2	CCTTGGGCCTTCAGCAAATTTTCTCCTTTAAAAATTTCCTTTAATACTGTGTAATGTTGC	461	ENST00000418953	Ensembl	+	61267214	61265123	noncoding
ASHG19A3A034585	129.474	110.844	136.23	166.722	234.793	253.359	260.301	7.10636	6.89336	7.21066	7.29959	7.8914	7.97505	7.92738	P	P	P	P	P	P	P	chr1	RP11-335G20.5	TTTTCACTGCAATCAGCTGCTCCAACTTTGTCTTGTACATGGCTCTTTGACCTTGGGCTT	777	ENST00000450820	Ensembl	-	25594376	25579797	noncoding
ASHG19A3A040642	484.085	492.073	502.205	482.485	456.944	466.375	372.818	8.88494	8.90617	8.97486	8.93001	8.89947	8.89568	8.46464	P	P	P	P	P	P	P	chrX	NCRNA00103	ACCCGGCCCGTGGGGGAGGTTCCGTCCCGCCGCCTTCGCCCGCGCGCTGCACTCGCGGAC	2915	NR_033380	RefSeq_NR	+	2575270	2527305	noncoding
ASHG19A3A034155	25.699	19.8976	21.1824	27.9256	29.7766	30.4915	38.5977	4.85579	4.59998	4.64422	4.6162	4.78925	4.80361	5.04402	A	P	P	P	P	P	P	chr1	RP11-306I1.2	GACTGGATCTCGACTCCAGAGTTTGCTCCTGAGATCGAAAAACAAAACAACCCAATAATA	492	ENST00000452618	Ensembl	+	165592568	165567699	noncoding
ASHG19A3A029365	30.3273	25.767	21.7255	13.0983	20.7719	21.2116	23.3641	5.08245	4.92414	4.67699	3.42808	4.25299	4.25148	4.27321	P	P	P	P	P	P	A	chr6	RP3-380B8.3	CCCTGTGAAGATATTGCAAATGCTGCACCACTTTGACACAGACGAATATTGCCTTAATGC	361	ENST00000444978	Ensembl	-	5876103	5875163	noncoding
ASHG19A3A030299	24.9798	7.52684	23.6383	5	33.0682	26.2033	31.3378	4.81228	3.47083	4.78888	2.32974	4.94319	4.57366	4.72666	A	P	P	P	P	P	A	chr6	RP1-104O17.3	TTGAATCATCTTGATCCTTGAGCTTGGGTTAAGGCGATCCCAGATTGCAAGTTTCTCTGG	499	ENST00000432438	Ensembl	-	98165073	98158828	noncoding
ASHG19A3A042733	28.3163	25.2123	34.6916	232.39	221.537	233.033	248.062	4.9855	4.89795	5.32126	7.80599	7.80101	7.84938	7.85527	P	P	P	P	P	P	P	chr10	RP11-292F22.5	CCGTAGCTGTCATACAGAGTGTGATTTATGACTTGTAAGTTGTGCTATGGAGCTTGACAA	167	ENST00000418196	Ensembl	-	47573855	47570512	noncoding
ASHG19A3A012639	5	5.1223	5	18.376	17.7802	15.7015	23.2117	2.37766	2.32691	2.39437	3.97198	4.01028	3.77497	4.2629	A	A	A	P	P	P	P	chr1		TTTAATAAGAAGGAAGCCCTGATGAATGTCACAAAGCCAATAAATGTGGCCACCACCACG	1228	CR591832	misc_RNA	-	234795953	234794726	noncoding
ASHG19A3A009341	53.3031	51.8565	45.8122	58.3882	64.1655	61.1237	73.7495	5.8757	5.85838	5.71053	5.72345	5.94462	5.84169	6.01768	P	P	P	P	P	P	P	chr1	RP11-553K8.2	GATCTCTGAGTGACTACAGTGAACAAAGAAAGAAAGACTCCTGCCAAACCTTGTGGACAG	363	ENST00000429469	Ensembl	-	198567998	198566853	noncoding
ASHG19A3A039424	26.1996	64.9117	33.4222	121.946	110.314	97.7475	18.0759	4.88333	6.15915	5.27138	6.82979	6.749	6.53686	3.86871	P	P	P	P	P	P	P	chr9	RP11-426A6.7	TTTTTTACTGGCCAACCTCCTTTTGCCTTTCAGGAGTGTGACTGAGCAACCTCTTTGGTT	795	ENST00000455039	Ensembl	+	138364095	138359933	noncoding
ASHG19A3A030338	39.6691	51.1021	48.8062	100.99	91.4471	90.1076	53.9845	5.45473	5.83975	5.79755	6.54664	6.46616	6.41491	5.55079	P	P	P	P	P	P	P	chr6	LOC553137	TAGGAATAAAGGCAAAACCAAGATAGGCCCACCCTGACAAAGCCTAAAACCAACTCTTCA	2491	NR_015365	RefSeq_NR	-	107222877	107218006	noncoding
ASHG19A3A042773	31.0904	33.3033	35.5459	102.963	82.9373	78.6799	44.4613	5.11483	5.26858	5.35643	6.57665	6.32577	6.21443	5.26067	P	P	P	P	P	P	P	chr1	RP4-811H24.9	TTTCTGTGTCTTTTTTGTTTGTAGTCTGTGATCCTGGGAGCCCTGGGGCCAGTTTAAACA	687	ENST00000448134	Ensembl	-	32816264	32814794	noncoding
ASHG19A3A013262	22.5346	22.4528	24.3915	41.6335	36.659	37.4734	40.5218	4.65951	4.74807	4.83506	5.21417	5.09836	5.11183	5.12061	A	P	P	P	P	P	P	chr2	AC011747.3	ATTTCCTGCCAGCTGCTACTGGTTTTTTAGTCAGCTCTGACAGCTACGGTAATTGGGAAA	1036	ENST00000418358	Ensembl	-	8715631	8683721	noncoding
ASHG19A3A041348	14.2122	26.2512	18.4199	26.282	28.8299	31.0366	35.6498	4.00706	4.951	4.4518	4.52438	4.74412	4.82846	4.92684	P	A	P	P	P	P	P	chrX	AK090973	TCAGTCTCTGCCCATTGAGACAAAAGAGCGTGACAAGCCGCGCGACGCGGCCAATCAGCG	2293	uc004eln.1	UCSC_knowngene	+	103187485	103173478	noncoding
ASHG19A3A009362	32.3426	22.9388	23.4455	59.6121	54.5785	51.259	62.4008	5.1723	4.77592	4.78003	5.7568	5.69844	5.57891	5.76737	A	P	P	P	P	P	P	chr1	DM004468	GAATTAAAATCAAAACCATCGACCGTTGATTGTACCCTATGGCTAACCATCATCTACTCC	109	uc001guy.2	UCSC_knowngene	-	198828282	198828173	noncoding
ASHG19A3A013041	19.7375	10.7721	23.6698	17.8976	40.5907	43.8968	59.9773	4.47014	3.85359	4.791	3.93136	5.25259	5.34886	5.70744	A	P	P	P	P	P	P	chr1	RP11-544D21.1	GGAAGTGTTCCTGGTTTGGCAGTATATGACATTAAGGTTTAAAAGTCAGTGTTTTCATTT	448	ENST00000442410	Ensembl	-	239461237	239433024	noncoding
ASHG19A3A000217	9.55214	5.02887	10.3283	21.1728	19.941	14.6111	18.4953	3.4591	2.32311	3.66289	4.18783	4.19144	3.66212	3.90411	A	A	A	P	P	P	P	chr1	RP11-426L16.8	TGCCACGCACGCGCTCGGCTCCGCGCTTAATGCAACGCGAATGAAATTTGGTGCCATCAC	767	ENST00000433505	Ensembl	-	113392437	113362791	noncoding
ASHG19A3A038487	264.323	253.909	287.953	2007.9	2167.09	2200.5	2214.49	8.06788	8.01071	8.22769	11.0713	11.2171	11.2144	11.154	P	P	P	P	P	P	P	chr9	RP11-255A11.21	AGCTGGTCTGGCCCTGGACGTGCCTTCAGGTGCTGGTTATGCTTTATGACCTGTGTTGTG	902	ENST00000433357	Ensembl	+	33605291	33602498	noncoding
ASHG19A3A020278	61.9526	57.4785	60.676	49.5919	59.6208	76.687	90.8369	6.08126	5.99456	6.09636	5.48281	5.83648	6.17753	6.32577	P	P	P	P	P	P	P	chr22	CTA-929C8.5	ATCTGTTTGAAGAGGAAAGCAAATGGCAGAGCATCTCACCTCTAGACCAACTGACCTTTG	274	ENST00000449126	Ensembl	+	27682310	27672200	noncoding
ASHG19A3A049392	39.9246	30.6108	33.9607	61.2468	54.0327	47.0672	52.419	5.4642	5.15342	5.29095	5.79857	5.68291	5.45505	5.50736	P	P	P	P	P	P	P	chr13	RP11-223E19.2	TGCTAAGGAATTCCTACTCCTACTGGGGCCTAATGTCAGGCTTTCCTTATATTGTGGAGT	448	ENST00000420694	Ensembl	-	30996374	30993655	noncoding
ASHG19A3A018882	65.6589	70.3142	68.7034	28.9059	27.1328	24.752	25.7951	6.16647	6.26854	6.26674	4.67054	4.64637	4.48946	4.42574	P	P	P	P	P	P	P	chr21	AF064858.11	GGGCCAGCAGGACAGAGGAAACAGAAAGTACATGACCGATGATGTCTTTCGACCACAGAA	509	ENST00000419664	Ensembl	-	40383255	40378573	noncoding
ASHG19A3A012647	257.476	285.227	243.403	316.767	360.376	354.086	416.076	8.03497	8.16501	7.98767	8.27963	8.52778	8.47402	8.63426	P	P	P	P	P	P	P	chr1	RP11-443B7.1	GACAGCACTTCCTCATTAAATGCAGAGATCTGCAAAAAGGGAAAATAAAAACACAAGAAG	426	ENST00000451766	Ensembl	-	235105809	235095412	noncoding
ASHG19A3A007962	314.573	271.395	331.065	249.61	365.127	478.46	554.183	8.30847	8.10061	8.42004	7.91615	8.54772	8.93928	9.08268	P	P	P	P	P	P	P	chr17	AC005703.3	ATTTCTCTTCAATGTTGGCTTCTATGGATGTTTTCTGTTCCCTCTTCGCTGGCCTGGAGT	1773	ENST00000431343	Ensembl	-	15175607	15170777	noncoding
ASHG19A3A049850	280.055	276.398	302.707	146.079	312.527	361.025	363.279	8.14076	8.1263	8.29471	7.0978	8.3197	8.50159	8.42724	P	P	P	P	P	P	P	chr13	RP11-315H15.1	GAAGGTTTTCTAACCTTCTATCAGATTTTCTAACCTCCCCAAGCCACAGGATGAGAAAAG	657	ENST00000413637	Ensembl	-	112985539	112976880	noncoding
ASHG19A3A015771	20.1138	6.44638	10.698	41.0561	32.9148	36.7234	33.3247	4.496	3.3058	3.70989	5.19477	4.93626	5.08293	4.81817	A	A	A	P	P	M	P	chr2	AC097495.2	GAGTTGGAAACTCAGTTCTACTCTATTGGTATCAGGTTGCATTCTGTATCATCATTAAAA	436	ENST00000415138	Ensembl	+	69064840	69059175	noncoding
ASHG19A3A039326	227.712	239.336	235.199	218.362	256.14	222.427	233.47	7.87009	7.93488	7.93957	7.70543	8.03565	7.7793	7.75989	P	P	P	P	P	P	P	chr9	BC037833	AGAGAAACCCAGCAACGCTACTTTCTAAGGGCATTTTTCCCTCTCATTTGGAATCCTGAG	2449	uc004bya.1	UCSC_knowngene	+	132346835	132337687	noncoding
ASHG19A3A013747	5.63611	5.77721	5	144.814	123.404	126.141	146.519	2.82147	2.97611	2.39437	7.08378	6.91871	6.92152	7.05763	A	A	A	P	P	M	P	chr2	AC007386.2	GGGAGACCTCTGTAATTGTGTACCATGTGCATATATTACCTATTCAGAGAATAATAAAAC	2928	ENST00000449259	Ensembl	-	65132271	65128973	noncoding
ASHG19A3A009454	63.7775	66.1082	68.2354	69.5271	63.8826	69.2355	76.3673	6.12166	6.18361	6.25605	5.99029	5.93928	6.03184	6.07147	P	P	P	P	P	P	P	chr17	AC091178.1	TTCTGGACAGACATGGAGAGCTTCTGAAAGTCCCGCATGCTTGGAATTATTTTCAAGACC	3239	ENST00000425901	Ensembl	+	37201194	37186158	noncoding
ASHG19A3A027103	61.7335	64.9735	62.4747	30.574	32.3186	25.7254	29.2335	6.07589	6.16076	6.13714	4.75356	4.91137	4.54543	4.6206	P	P	P	P	P	P	P	chr1	RP11-356N1.2	TATTCAAAACCATGTGTGGCTCAGTCCAACTGGAGAGACCAAGTCAAAGAGCCTCATTTC	432	ENST00000419428	Ensembl	+	108617141	108614103	noncoding
ASHG19A3A013191	8.77863	11.078	8.43247	26.8442	33.3926	30.5961	26.1744	3.33796	3.89033	3.38657	4.5586	4.95747	4.80967	4.44697	A	A	A	P	P	P	P	chr2	BC043553	AAAGGGGAAGGCATCGCAAGTTTCCAGCTCCATGGATTTTTGCAAACTGAGCACATTTGT	776	uc002qwn.1	UCSC_knowngene	-	863877	780346	noncoding
ASHG19A3A017887	122.491	125.009	125.899	173.259	164.227	155.291	171.119	7.03313	7.05589	7.10073	7.35479	7.35089	7.23459	7.28408	P	P	P	P	P	P	P	chr20	RP13-30A9.1	AATGCACGTTCCAGGGCCCTCTTTCAGCCTCTCTCAAGCCTGAATTTGGGAAGACTGCGG	499	ENST00000427132	Ensembl	-	61266856	61265032	noncoding
ASHG19A3A042352	24.4291	25.7086	14.2587	26.6548	21.2291	20.6137	31.8365	4.77963	4.921	4.09639	4.54562	4.28489	4.20781	4.7506	P	P	A	P	P	P	P	chr10	AK097474	TGCCATCACACAGAAGAGAGAACTTACCAAGCAATACCAACACATTCATTCTCCAATAAA	2097	uc001igo.1	UCSC_knowngene	-	2056542	2047666	noncoding
ASHG19A3A030563	13.0218	5	5	41.4177	32.3898	37.7092	40.6202	3.88201	2.32192	2.39437	5.20676	4.91464	5.122	5.12371	A	A	A	P	P	P	P	chr6	RP1-287H17.1	GATCTCCATGTGTAGCATCAAAAAGCATTAAGTAAATTGCTGTGGAATGTGTCTTCAATG	929	ENST00000447557	Ensembl	-	135028487	135027197	noncoding
ASHG19A3A020072	45.8984	49.8232	42.9115	58.064	50.4416	48.4236	60.8213	5.66428	5.80269	5.62167	5.71561	5.57803	5.49542	5.7256	P	P	P	P	P	P	P	chr22		GCACGGTGTCCCTGGGTTGGCCACCCAGCTTAGTTTTAAAATAAAATAATGTAATCTTGG	1284	X91348	RNAdb	+	19018742	18958141	noncoding
ASHG19A3A043717	39.3603	38.4858	41.6977	25.4599	42.0341	52.6036	57.9914	5.44552	5.4603	5.58037	4.47354	5.30518	5.62019	5.65892	P	P	P	P	P	P	P	chr10	RP11-80K21.3	GTTTGAAAGTGGGCATCACTCTTGGGCTCCCACATTGACTGTAGTTTTACGGAATGTTTG	789	ENST00000436140	Ensembl	+	25406286	25401986	noncoding
ASHG19A3A018454	44.987	49.7608	50.2826	40.1567	66.7378	70.0693	75.1531	5.63531	5.80058	5.83554	5.16038	6.00295	6.05347	6.04865	P	P	P	P	P	P	P	chr20	RP4-723E3.1	AAGAGACACGAAGTGATAAACCGAGCACCCTCTTTGAAGATTTCCCAGTATATTTGTCCC	745	ENST00000454600	Ensembl	+	51263280	50827183	noncoding
ASHG19A3A049783	92.9459	80.5372	86.5663	146.974	141.415	152.072	180.184	6.65596	6.45247	6.59342	7.10608	7.12542	7.20103	7.3651	P	P	P	P	P	P	P	chr13	AK123584	TACTTTTCAAAGTCCTCTTCTCTGTTCCAGACCACTATGGGCAACTCTCTATCTATTCGA	2796	uc001voi.1	UCSC_knowngene	-	100148992	100143728	noncoding
ASHG19A3A019345	136.639	132.268	140.626	376.351	321.913	318.999	403.188	7.18119	7.13352	7.25385	8.54121	8.36628	8.32687	8.58666	P	P	P	P	P	P	P	chr21	AP001065.15	CTGGAATCTCGGAAGGTGAATGTCTGCCTTCGAAAACCCTACCACCTGTCTTTCTTGTGG	912	ENST00000449713	Ensembl	+	45910171	45905459	noncoding
ASHG19A3A054980	4185.26	3989.55	4584.68	5870.4	5562.34	5502.27	6720.52	11.8679	11.8068	12.06	12.6485	12.6108	12.5551	12.7744	P	P	P	P	P	P	P	chr1	BC041451	ACTCCCTCCTTCTGGGTGTGCGGCTGAAGACTGGAAGCAGGTTGCCTTGCCTGCTGCAAG	1707	uc001ggd.2	UCSC_knowngene	-	169429907	169411876	noncoding
ASHG19A3A030192	196.639	200.065	202.383	11.2119	18.8386	29.1012	38.269	7.68034	7.69306	7.74594	3.191	4.10835	4.73293	5.03116	P	P	P	P	P	P	A	chr6	RP11-379B8.1	CTTGAGAAAAGCACAGTTCTCTGTCTTACTCTTACTCTAAACTTGGAGATAAATGCATTT	822	ENST00000418567	Ensembl	-	82643197	82554901	noncoding
ASHG19A3A031927	154.718	144.093	148.507	153.348	214.036	222.902	238.127	7.34802	7.25047	7.32741	7.16813	7.7499	7.78128	7.79396	P	P	P	P	P	P	P	chr6	RP1-249I4.2	GTTTGGCCCCCTAGCATTTTTTATATGTTCTGTTGAGATAAGTATTGCTTAAATGAATCG	465	ENST00000458693	Ensembl	+	110149988	110147724	noncoding
ASHG19A3A020282	158.67	151.522	173.435	127.773	187.447	224.755	253.434	7.3796	7.31529	7.53603	6.89647	7.54946	7.79137	7.8912	P	P	P	P	P	P	P	chr22	RP11-375H17.1	CATACTGTCTCGATTTCTATCTCTTCCTAAATGCCTTTTCCCAGCTTGATACATTAAAAA	451	ENST00000417957	Ensembl	+	28117665	28112467	noncoding
ASHG19A3A009134	152.125	150.704	138.751	127.1	250.351	261.371	329.925	7.32408	7.30733	7.23663	6.88974	7.99724	8.02084	8.28607	P	P	P	P	P	P	P	chr17	CDRT15P	TCTGTGTTTGGAAATTCCAGTGGAAAGTGACTGATGCTGGTGACCCTTTCTCCTTTCTCA	1101	NR_003261	RefSeq_NR	+	13928915	13927814	noncoding
ASHG19A3A017944	15.4336	39.7154	12.0043	34.5189	267.638	22.0331	12.7278	4.11694	5.5012	3.86361	4.93468	8.09866	4.31138	3.28182	P	A	A	A	P	P	P	chr1	LOC284632	AAAGGCAGGGACCTGTTCCACGATGCTCCCAAGCTCAGATCACAGCGAGCTAAAGGGAAC	1863	NR_027087	RefSeq_NR	+	24538180	24526729	noncoding
ASHG19A3A043526	18.6793	37.5369	17.9954	53.6866	41.4929	41.5891	54.7382	4.38949	5.42643	4.41909	5.6002	5.28722	5.26799	5.57142	P	P	P	P	P	P	P	chr10	RP11-298E9.4	GACTCTTTACTGCTTTCAACTCTGGGGTCATGTTCTACTAAAAGTTTTATGAAAACAACA	465	ENST00000421821	Ensembl	+	3248816	3247907	noncoding
ASHG19A3A000225	12678	11813.8	12347.5	9902.12	9158.26	9586.3	10116.2	13.4163	13.3273	13.445	13.4303	13.3429	13.3705	13.3767	P	P	P	P	P	P	P	chr6	RP11-557H15.4	gccgcagggacctctgcctaggaaagccagGTTGTCTGCCAACGCTAACTGGCCAGCTCT	534	ENST00000434593	Ensembl	-	134980974	134846462	noncoding
ASHG19A3A000166	28.8592	15.7954	26.7914	17.6726	21.5151	30.1575	27.5574	5.01478	4.31025	4.97109	3.91061	4.30331	4.78756	4.52269	A	P	P	P	P	P	P	chr10	RP13-16H11.1	tcagcctcctgagtagctgggattagaggtGGAGAGGAGTGGAAGACCTTCTGGTGTGGG	1220	ENST00000423917	Ensembl	+	26942375	26936914	noncoding
ASHG19A3A007932	128.612	109.389	116.199	40.2784	56.4982	67.4912	78.0473	7.0984	6.87465	6.99075	5.16433	5.75124	5.99259	6.10368	P	P	P	P	P	P	P	chr17	BC041634	AACATTGAGGTGTCTCCTGAAAAACTGGACCTGTAATTTGGCCATGGGAAGAGGAGAAGA	1466	uc002gmz.2	UCSC_knowngene	-	10707354	10698231	noncoding
ASHG19A3A031248	5	9.43301	5	81.4253	72.6766	64.4604	18.7827	2.37766	3.70739	2.39437	6.23412	6.12459	5.92501	3.92615	A	A	A	P	P	P	P	chr6	XXbac-BPG249D20.9	TTTCCTGGATAGGAGACTACGTCTGTATCTTGTATCACAGGAGGCACCTTCTTCCTGTTT	851	ENST00000415195	Ensembl	+	30486994	30484042	noncoding
ASHG19A3A007507	3747.18	3853.12	3875.56	3213.67	2803.33	3359.52	3437.19	11.7035	11.7495	11.8222	11.7584	11.5943	11.8307	11.8054	P	P	P	P	P	P	P	chr1	LOC645166	TGCGGCCAAGACTCCGTCCTGCAAGACTCTTTGGCAGTTGCACTGGGTACTGGCTGAGTT	592	NR_027356	RefSeq_NR	+	148951595	148928285	noncoding
ASHG19A3A045972	222.466	223.693	224.147	174.605	256.389	294.335	311.758	7.84153	7.84395	7.87711	7.36838	8.03721	8.20758	8.20237	P	P	P	P	P	P	P	chr11	AC051649.16	GCATACCTGATTTTCTCGACCTCTTTTATGAAATATCCCCGCCAGACTCCCTCGACCGTG	315	ENST00000455671	Ensembl	+	1929145	1923876	noncoding
ASHG19A3A033859	23.0491	26.3311	28.2746	38.611	36.6389	23.7374	51.5915	4.69634	4.95608	5.04479	5.10409	5.09741	4.42636	5.48107	P	P	P	P	P	P	P	chr7	AC073094.4	AGGGAAGAGAAAGGCTCCAACCTTGACCCTGTCAAATAAATATCTCTAACTTTTTCTGTC	433	ENST00000453798	Ensembl	+	1308903	1306988	noncoding
ASHG19A3A047151	36.8144	38.8349	38.9519	50.1959	40.9883	32.4852	51.4686	5.35445	5.47227	5.48863	5.50268	5.2683	4.8966	5.47709	P	P	P	P	P	P	P	chr11	AP002856.6	AATGGACATTTGAGCATGCTCTGATTCTCAGCACTCCCTGGGGAAAAGAAAGAAGAAACC	562	ENST00000447864	Ensembl	+	131085058	131074893	noncoding
ASHG19A3A013913	253.473	229.483	261.876	558.253	499.282	489.165	591.896	8.01334	7.87807	8.08922	9.15533	9.04247	8.97352	9.18115	P	P	P	P	P	P	P	chr2	AC084193.1	ATCATTCCATTGCCTCTCGCTGCTCTGCTGTTGCTTTCCACCAGCGTAAAATCAATTAAG	769	ENST00000450290	Ensembl	-	81097315	80926512	noncoding
ASHG19A3A013730	45.4537	50.2825	43.972	43.0734	34.3607	30.8615	20.7534	5.65142	5.81553	5.65477	5.26387	5.00149	4.8208	4.0828	P	P	P	P	P	P	P	chr2	AC012368.1	TGCCTATGTCTATCCTCCAAGACTCAGTTATATTTCCACGTTTTGTTTGTTGAAGCAGAG	563	ENST00000423539	Ensembl	-	64315380	64313483	noncoding
ASHG19A3A018482	413.696	390.319	424.542	700.915	639.405	632.646	754.715	8.68224	8.59713	8.75274	9.49632	9.41192	9.36032	9.5507	P	P	P	P	P	P	P	chr20	RP11-560A15.4	AGATGGTTCAAGGGTTGTGTGTGTTTCCTCTGCCTGCTGTAATAAATTACTACAAACTAA	377	ENST00000442780	Ensembl	+	55682184	55680796	noncoding
ASHG19A3A038645	13.5562	11.4691	8.33776	26.238	24.6502	29.2839	25.7859	3.93558	3.93292	3.37159	4.52196	4.50132	4.74036	4.42505	A	A	A	P	P	P	P	chr9	RP11-475I24.8	TAATATTCTTCTCTTTCTGAAGTAGTTGAATTGGGAGAGACAGCTTGCCAGGCCTGCTGC	3614	ENST00000425493	Ensembl	+	44391705	44384584	noncoding
ASHG19A3A050120	11.2744	25.7783	12.5714	280.42	263.395	256.882	234.991	3.68027	4.92562	3.9263	8.09162	8.07457	7.99428	7.77169	A	A	A	P	P	P	P	chr13	LOC121838	TCAGTGAAATCCATGCCTTCTGGAGGACTGCTTGTAAATAAATATTAAGCACAACCATTA	2564	NR_026955	RefSeq_NR	+	44604598	44596470	noncoding
ASHG19A3A020280	5.62426	5.22911	5.72525	70.9069	66.9837	62.7051	38.0128	2.81959	2.33116	2.93471	6.01894	6.00933	5.88259	5.02069	A	A	A	P	P	P	P	chr22	CTA-929C8.8	TCAGAACTTTCCCCATGGGAGCATTTATAAAAAGGGGACACCCAGCGCAGAAGATGTTTT	571	ENST00000413244	Ensembl	+	27775226	27727747	noncoding
ASHG19A3A015888	37.2895	55.432	34.1485	40.8323	37.2013	26.2434	46.6455	5.37126	5.94493	5.29965	5.18546	5.12311	4.57561	5.33041	P	P	P	P	P	P	P	chr2	AC010744.1	ACACAGGCACAAAGCAGAAGCATTTTCTTCCACTTCAACAGAGCTCCTATGCCTAAACAG	303	ENST00000448431	Ensembl	+	83750626	83749937	noncoding
ASHG19A3A029373	20.0462	15.9288	22.9154	60.5934	63.1466	68.7783	73.5675	4.4906	4.32088	4.74786	5.78062	5.92276	6.02053	6.01301	A	P	P	P	P	P	P	chr6	AL031123.1	ATTAACAACCATGGCTCATTCACAGCCAGGCAGCCAAATGGACAGCTCTATAAGACTCAA	2641	ENST00000512967	Ensembl	-	6700720	6695026	noncoding
ASHG19A3A029433	8.15676	6.8547	5	72.2358	70.9034	65.0499	67.3512	3.23282	3.37129	2.39437	6.04555	6.08901	5.93992	5.88168	A	A	A	P	P	P	P	chr6	RP11-330A16.1	AAGAAAAAGGAGAATTTGGGCTTGCACTGAGAGGATTACCTTTGGTGGTCTGGAAGTGGT	147	ENST00000414740	Ensembl	-	14599921	14597744	noncoding
ASHG19A3A019635	216.122	194.143	223.811	46.9828	33.036	43.6401	42.5281	7.80158	7.65104	7.87458	5.399	4.94154	5.33978	5.19375	P	P	P	P	P	P	P	chr22	RP5-1172A22.1	GACCTTCATCACTGTGAACAGTGATGCAGTGGCTTTATAAACTCTAGAATGTGCTACAAT	637	ENST00000444114	Ensembl	-	27620688	27617309	noncoding
ASHG19A3A049877	17.4494	20.9669	21.1308	42.7362	47.5795	47.3037	53.7022	4.28631	4.66505	4.64165	5.25312	5.49108	5.46257	5.54413	A	P	P	P	P	P	P	chr13	RP11-199F6.5	TAATCCAGGTTCAGTTTCTGCCAGCACTAATTTGGTTTATTCCACATGGCTGGAGCCACT	563	ENST00000430978	Ensembl	-	114586528	114582225	noncoding
ASHG19A3A018721	29.888	21.4719	31.857	30.7675	84.2309	93.8852	105.594	5.06466	4.69405	5.20866	4.76119	6.34615	6.47716	6.55487	A	P	P	P	P	P	P	chr21	BC047600	GAAAATAACAGAAAAACTGACCTCTGTGGCTTAAACAAGTAAGGATTTATTTTCCTTCCG	4482	uc002yml.2	UCSC_knowngene	-	29600986	29488416	noncoding
ASHG19A3A009230	8.07797	5.02534	5	30.8209	37.8794	30.9825	46.9909	3.22189	2.32297	2.39437	4.76408	5.14876	4.82612	5.3436	A	A	A	P	P	P	P	chr17	AC004448.2	CCCTACTCTAACACACACAGAAATGGGTTCTTTGAAATGGAGTGATGCTGTATCAGACAG	520	ENST00000437646	Ensembl	+	19327670	19322347	noncoding
ASHG19A3A016411	49.9237	42.0321	51.3419	51.9292	37.66	55.4754	48.8509	5.78026	5.57759	5.86569	5.55432	5.14071	5.69965	5.39788	P	P	P	P	P	P	P	chr2	AC068492.1	GACAGTCAAAGAAATCATGAAGGTCTACTATATGTATTTCCACTCCTGACCTAACTGAAT	469	ENST00000448672	Ensembl	+	136836083	136835461	noncoding
ASHG19A3A000088	143.221	117.765	161.146	104.746	191.38	248.259	282.368	7.24131	6.97218	7.43479	6.60269	7.5793	7.94739	8.05241	P	P	P	P	P	P	P	chr20	RP4-737E23.2	GCTTCAGCCCTTCTTGCTCTCCATGGCAGAAGTCCTAGCAGAGTATGCCCACGCTGGTTA	556	ENST00000411595	Ensembl	+	23170944	23168764	noncoding
ASHG19A3A013542	85.0336	85.9866	80.9527	52.1562	52.8369	65.9265	79.3556	6.53277	6.54024	6.49915	5.56029	5.64686	5.96081	6.13071	P	P	P	P	P	P	P	chr2	AC104654.2	ATTCCTGATTTCCATAATCTGTACCTGGAGGTTTATACAGGAGAGGATCACTGGGGCAGA	769	ENST00000436551	Ensembl	-	42160863	42158758	noncoding
ASHG19A3A032095	19.673	45.7691	21.0741	106.477	87.7229	83.2221	24.0596	4.46596	5.69078	4.63825	6.62551	6.40375	6.2927	4.31931	P	A	P	P	P	P	P	chr6	MGC34034	CAACATCCTGGCCATCTGCATTCATATAAAGTGGTTATTTTCATGGATAATTCACCTTAT	3517	NR_027029	RefSeq_NR	+	134175130	134142284	noncoding
ASHG19A3A018698	23.1314	59.1452	23.3216	143.416	125.828	96.2947	38.3761	4.70193	6.03057	4.77306	7.06882	6.94998	6.51436	5.03491	P	P	P	P	P	P	M	chr21	AP001342.1	TCAAGTTCCAGTTTTTCCCAAAGGACCCTTTTGTTTCTGCTGCTCCACATGCAGCTTATA	525	ENST00000423389	Ensembl	-	26403842	26403317	noncoding
ASHG19A3A029432	5	5.21401	5	99.239	96.0113	82.1607	105.134	2.37766	2.33057	2.39437	6.52236	6.54296	6.2758	6.54678	A	A	A	P	P	P	P	chr6	RP3-448I9.2	GAGTCTTTTAATGAGCCGTTTCATAATGAGGGCTGAATCTACACACAGTATCTACATGCT	489	ENST00000456440	Ensembl	-	14393519	14391461	noncoding
ASHG19A3A014184	16941.3	16531.9	16672.5	13710.2	12419.6	13217.2	13856.9	13.8224	13.8031	13.8598	13.9073	13.7914	13.85	13.8429	P	P	P	P	P	P	P	chr2	NCRNA00116	GTTGAAGATGCATATAGACTACCGGAAAGAAATGACTTCTTCTTGCACTTTATGAATCAA	461	ENST00000426713	Ensembl	-	110970400	110969106	noncoding
ASHG19A3A044373	37.1521	27.9576	40.674	20.3724	17.0224	21.994	16.125	5.3656	5.03613	5.54591	4.13105	3.94372	4.30772	3.68394	P	P	P	A	P	P	P	chr10	RP11-129J12.1	TAAAAATCAGCAATCCGCACAGAGCAGGCAGCCGCTTTGGTTCGAATGAATTAATTTGCC	392	ENST00000452494	Ensembl	+	101288018	101286837	noncoding
ASHG19A3A029431	36.8585	27.7268	42.629	30.0604	33.5803	42.5474	43.1043	5.35646	5.02604	5.61169	4.72666	4.96595	5.30354	5.21287	P	P	P	P	P	P	P	chr6	RP11-359N11.2	ACCAAGAACCAATGAGCCATATTTGCTCTTCACACCTCAACAAAGATGCTGCTTCCAGGA	3152	ENST00000427276	Ensembl	-	14285376	14280357	noncoding
ASHG19A3A013938	32.1532	34.6537	29.1295	44.8136	35.6713	36.5623	51.1555	5.16328	5.32091	5.08728	5.33041	5.05952	5.07578	5.46798	P	P	P	P	P	P	P	chr1	RP5-857K21.15	TCCTGATTAATGGCCGATGAATTTCTCCTTAAGGCCCTGAAACTGCCTACTCAGAACCAA	676	ENST00000441866	Ensembl	+	461954	459655	noncoding
ASHG19A3A044162	78.9283	86.4614	77.9673	115.74	98.3585	76.8669	143.701	6.43684	6.54752	6.44299	6.74278	6.5752	6.18168	7.02799	P	P	P	P	P	P	P	chr10	AK126491	GGGCTTGACATAGGCTCTCTCATCTCCACACAGTTAATATGGTTTTACGATAAAACAAAG	3842	uc001jzw.1	UCSC_knowngene	+	80159502	80027098	noncoding
ASHG19A3A037342	44.7492	40.0967	42.9923	25.8461	56.9235	59.5561	63.3624	5.62633	5.51336	5.62374	4.49819	5.76364	5.80165	5.79075	P	P	P	P	P	P	P	chr9	RP11-397D12.4	TTTGTCCAGAAAGAAGAAAGAGTGGCTGCTTGGCCCGGGGGCTGTCAAAGGGCAAACCAG	243	ENST00000452923	Ensembl	-	37384431	37383174	noncoding
ASHG19A3A044020	322.603	331.904	344.914	77.6569	86.8953	98.0458	99.1526	8.34535	8.3767	8.47708	6.15828	6.38983	6.54154	6.45526	P	P	P	P	P	P	P	chr10	RP11-222A11.1	GAGAACTACTCAAGAGAACAAAACCACCAGCAATATCCACCTGTATTTGTCTTTTCATAA	744	ENST00000433152	Ensembl	+	67441220	67345445	noncoding
ASHG19A3A043515	18.2217	46.2845	22.3039	106.008	93.0322	75.0327	9.48036	4.35359	5.70621	4.71304	6.61968	6.49586	6.14706	2.86331	P	A	P	A	P	P	P	chr10	RP11-526P5.2	TAGAATCATTATTCCTGAAGGTTTTGCTGTCCTTTGCGCTCAGAGATGGTCCCACTGACT	918	ENST00000438753	Ensembl	+	2609431	2543974	noncoding
ASHG19A3A013260	25.753	24.6667	24.1751	118.612	120.974	112.607	127.617	4.85848	4.86948	4.8215	6.7821	6.88906	6.74411	6.83931	A	P	P	P	P	P	P	chr2	BC043563	ACTGACTGCTGGGTTCGATGGTTCAAAGAGAAAAAGCACGTGATAACTTTGAAGGAGGCT	1813	uc010eww.1	UCSC_knowngene	-	8464814	8147901	noncoding
ASHG19A3A042512	13.6379	17.7203	16.9227	16.7632	23.7639	15.9344	21.7364	3.94591	4.45634	4.33694	3.82796	4.44507	3.8016	4.16146	A	A	A	P	P	P	P	chr10	BC014575	CACACCAAAGAAGTGTGCATTATTCAATAAATGTGTTCCTGATATGTTGCATGTAAACTG	1397	uc001iqf.2	UCSC_knowngene	-	20017479	19999263	noncoding
ASHG19A3A019408	36.0081	28.8429	28.9151	48.2949	47.0477	49.5632	57.881	5.32661	5.07615	5.07669	5.43713	5.47538	5.53008	5.6566	P	P	P	P	P	P	P	chr22	LA16c-83F12.6	TTAGATGAGAAGCTCTGCTATGCAATCAAGAATCTCAGCCACTCATTTCTGTAGGGGCTG	624	ENST00000453395	Ensembl	-	16231333	16199665	noncoding
ASHG19A3A028504	44.8327	42.6742	54.1487	78.3902	67.8371	64.4017	66.1859	5.62926	5.59968	5.93764	6.17319	6.02735	5.92321	5.85503	P	P	P	P	P	P	P	chr1	RP4-543J13.1	AAGGCATACAGGGAAGTCTTACCCCCTGCAAAGTGATGAGCACTAGACATCCTTTTCTGT	332	ENST00000420156	Ensembl	+	114804900	114749048	noncoding
ASHG19A3A030723	30.9244	14.4512	16.2865	16.4297	16.8458	15.4667	22.2844	5.10845	4.20648	4.28646	3.79493	3.92513	3.75086	4.19735	A	P	A	P	P	P	P	chr6	RP11-475C16.2	GAGAGACCAAAAATAAACATAATGAAATAGAGGACATTCTCGCGCCTCAAAAAATTGAAC	438	ENST00000436953	Ensembl	-	153630117	153625729	noncoding
ASHG19A3A042807	308.387	290.213	232.534	90.0202	86.3289	74.7357	47.5007	8.28049	8.1882	7.92343	6.38453	6.38156	6.14216	5.35906	P	P	P	P	P	P	P	chr10	RP11-556E13.1	TGTATTCTGGGATCAAACCACCTGGCTGGAGATGCTTACTAACCTCAGTTTCTTCATCTG	369	ENST00000443523	Ensembl	-	54515169	54316742	noncoding
ASHG19A3A043574	98.7011	101.852	100.102	152.798	133.449	120.208	168.152	6.74297	6.7775	6.78671	7.16397	7.03616	6.8478	7.25679	P	P	P	P	P	P	P	chr10	RP11-393K12.2	TCAGTTGTGTCCTATTAGGTGCTCCGCTAACATTCTGCTTTCTCTTCTGAGCCGTCAATA	436	ENST00000420049	Ensembl	+	7139637	7139113	noncoding
ASHG19A3A015085	22.0176	71.6502	5.91781	25.7489	31.4488	24.2678	37.5073	4.62521	6.29464	2.96911	4.49306	4.87206	4.45939	5.0005	P	P	A	P	P	P	P	chr2	AC074019.1	GGTCTGAGCTACCATAGAAAAGCTTCCCGCAACCAAATGAATTACAGACACTCAGCAAAA	427	ENST00000442062	Ensembl	-	229549296	229548252	noncoding
ASHG19A3A030965	24.008	19.9725	23.4948	148.712	213.202	152.726	165.423	4.75558	4.60407	4.7819	7.12273	7.74258	7.2082	7.23239	A	P	P	P	P	P	P	chr6	RP11-314C16.1	AGCCTCAAAGAGCGGTCTTGTTGACCCCAACTATATCATTTTTCATCAAAATCATTCTTG	489	ENST00000429060	Ensembl	+	8785678	8784410	noncoding
ASHG19A3A049990	92.2184	88.538	108.88	201.808	163.759	145.417	191.854	6.6436	6.58315	6.90631	7.58567	7.34532	7.13289	7.46215	P	P	P	P	P	P	P	chr13	RP11-125I23.3	TAAAATGGGGCTCATTGAATAAGGCTTACAAAGATGATGAGCTCCTGCCTGGGTTTGCAC	580	ENST00000431171	Ensembl	+	27948503	27947484	noncoding
ASHG19A3A040676	46.174	34.1059	40.98	64.8965	48.9331	68.2417	82.7308	5.67325	5.29763	5.5563	5.88327	5.53187	6.00847	6.18995	P	P	P	P	P	P	P	chrX	RP6-1O2.1	ACCTGCTATTTTGCTGCTGAGGTTTCTTCTGGGCCTATATGACATGCCCGTAATTTTGAG	611	ENST00000454113	Ensembl	+	10333363	10210378	noncoding
ASHG19A3A039601	177.284	188.499	186.29	179.097	276.739	308.81	317.426	7.53453	7.61232	7.63697	7.41003	8.15049	8.27727	8.22884	P	P	P	P	P	P	P	chrX	GS1-600G8.5	ACTAGTATTGTTAACCATTGCAAAGAAATACTGTTGCCCTCCATTAAAACCTGAACTGCC	1497	ENST00000412485	Ensembl	-	13321511	13284166	noncoding
ASHG19A3A011584	13.9309	30.1697	17.0548	71.4085	61.8982	51.2255	11.7142	3.97632	5.13342	4.34682	6.03003	5.89263	5.57778	3.16374	P	A	A	A	P	P	P	chr1	RP11-365O16.3	TTGTACATGAAGATAAAAATGCTCAGGTGTGCCCAGGTTGAAGAAGATGAAAGGCCCTGC	790	ENST00000436706	Ensembl	-	224400981	224396448	noncoding
ASHG19A3A000081	1685.68	2197.18	1743.44	4223.86	3994.01	3524.36	4662.59	10.5657	10.9624	10.6868	12.1601	12.1176	11.8943	12.2344	P	P	P	P	P	P	P	chr13	RP11-350A18.1	TGGAATCTTCCTCCTCCTCACTTCTCTGCCTTAAGGGCTCTGCCTGCCACAATTCATGAG	702	ENST00000400430	Ensembl	-	41055143	41025130	noncoding
ASHG19A3A018565	10.0297	6.17125	18.578	11.7793	16.8373	14.6936	16.8962	3.53257	3.24786	4.46472	3.26352	3.92393	3.67219	3.76043	A	A	P	P	P	P	A	chr20	HAR1A	TGTTTAGAGATTTTCCTCAAGTTTCAAATGAGGCGAATCCCGTTTTCCGCGATGCTGCAG	1882	ENST00000433161	Ensembl	+	61735738	61733556	noncoding
ASHG19A3A010806	52.0921	41.1725	53.102	31.6969	53.7829	73.1729	67.8848	5.84064	5.54895	5.91102	4.81019	5.67492	6.11466	5.8936	P	P	P	P	P	P	P	chr1	RP5-845O24.8	AAGATCAAAATTTCCAATCCGTATGTCTCGGGTGCCATCTGCTGATAGATCGGACCAGAT	378	ENST00000438401	Ensembl	-	12883022	12882548	noncoding
ASHG19A3A038935	384.396	412.922	321.607	188.556	184.728	166.361	122.837	8.58524	8.67599	8.37333	7.48611	7.5262	7.33653	6.78692	P	P	P	P	P	P	M	chr9	C9orf44	GCCGCCAGGTGACCCAGCAGCCCGGCCGCCGAGATGCCCAACCCGCCCAGGCTCCGGGCG	738	ENST00000367276	Ensembl	+	94910588	94903579	noncoding
ASHG19A3A012557	62.2541	45.7237	57.2127	129.562	117.018	121.199	129.522	6.08851	5.68933	6.01606	6.91393	6.84071	6.86105	6.86085	P	P	P	P	P	P	P	chr19	AK128099	TTCACAGGCACATCCAACCTCCATCCTTACATTCCACAAGGATTTGAGTGTCTGTTATAG	3312	uc002nzf.1	UCSC_knowngene	+	35907742	35896508	noncoding
ASHG19A3A012041	22.5972	19.5934	14.3884	30.6398	26.6669	37.2412	37.9153	4.66543	4.58063	4.10808	4.75575	4.61857	5.10319	5.01785	A	P	A	P	P	P	P	chr1	RP11-275O4.3	TATACAGTGACCTGGCTCAAATAATTCCAGGCTGTCATTAACCAGGTGAGCTCCTCTAGA	619	ENST00000422837	Ensembl	-	227708178	227698296	noncoding
ASHG19A3A008625	76.6659	111.012	72.2917	181.74	167.973	153.054	44.6314	6.39326	6.89479	6.33677	7.43544	7.38627	7.21169	5.26711	P	P	P	P	P	P	P	chr1	RP11-540K16.2	TCAAGTCACCGTCCACCCTTCAGCTCTGAGCTAGAATCTCAGCAGACACATCTGGGCCAG	532	ENST00000456771	Ensembl	-	181160285	181159606	noncoding
ASHG19A3A015258	72.5311	73.4855	56.2792	156.664	128.699	119.867	36.4472	6.31308	6.32742	5.99259	7.20297	6.98521	6.84405	4.95979	P	P	P	P	P	P	P	chr2	AC011995.2	GCTCCAGTTTCTTCGTTTGCAAAATGGGATCCTCAGAGACACCCACCTGGCCCTTTCACA	472	ENST00000440268	Ensembl	+	2876529	2875862	noncoding
ASHG19A3A050469	32.6454	29.5174	35.5297	69.071	71.8121	70.7377	73.8594	5.1849	5.10655	5.35545	5.97888	6.10759	6.06655	6.02021	P	P	P	P	P	P	P	chr13	RP11-54H7.2	TAAAAGGAAGCAACTCTGGAGAACAGAATGAGAAATCAGAAAGCAAGGCCCTGTCCTCTG	698	ENST00000455487	Ensembl	+	109940081	109934320	noncoding
ASHG19A3A017526	708.259	661.389	623.954	915.264	827.719	787.546	997.786	9.39507	9.29947	9.27165	9.91233	9.79586	9.69276	9.981	P	P	P	P	P	P	P	chr20	RP4-610C12.1	AATGGACTTATCGACCTCAAACCAATGGGACATATTCCTACATGGCCTTCTCCCCTGTTA	460	ENST00000432067	Ensembl	-	29596406	29565755	noncoding
ASHG19A3A018682	58.2628	63.2923	46.7231	76.6516	179.426	198.199	247.19	5.99821	6.12459	5.73618	6.13889	7.48316	7.59724	7.85111	P	P	P	P	P	P	P	chr21	AP000472.3	GAATGATGCCCCAAATGTTGATATGAATTACATAGTGTGTCCTGCTGTGAGCATCAGAAG	530	ENST00000452500	Ensembl	-	23348000	23305634	noncoding
ASHG19A3A042537	7.87538	22.8309	21.6683	52.6742	60.8418	46.4548	10.7519	3.18742	4.76997	4.673	5.57469	5.86569	5.43422	3.04227	A	A	P	A	P	P	P	chr10	RP11-128B16.3	AAGGATCCTCTTTCGCCCATGTTGGGGTTTTCGAAACTGGAAAGAAGACTGATTTCTGCA	422	ENST00000449071	Ensembl	-	26868236	26866604	noncoding
ASHG19A3A039884	225.106	376.176	261.513	310.516	321.295	269.829	115.329	7.85728	8.55171	8.08801	8.24567	8.36374	8.07218	6.69075	P	P	P	P	P	P	P	chrX	RP11-348F1.3	TCCTAGAACCTCAGAGGCATGAAGCTAGAATATCTTCCCCTTCAAGGAGAATAAGCCAAG	451	ENST00000425150	Ensembl	-	51139314	51099795	noncoding
ASHG19A3A040032	50.2389	36.8928	43.6912	193.618	211.268	220.274	251.23	5.79013	5.40502	5.64482	7.52734	7.73129	7.763	7.87747	P	P	P	P	P	P	P	chrX	RP5-1091N2.9	AAATGCCTCAGAAATGTTTTGTGATGAAGATGAAGGAGAGGCGCTGGAAGCAGAAACTGG	726	ENST00000450860	Ensembl	-	70418025	70403408	noncoding
ASHG19A3A037686	74.5457	68.9835	68.1965	214.699	208.469	212.985	228.609	6.35207	6.24226	6.25494	7.67759	7.70799	7.71094	7.72536	P	P	P	P	P	P	P	chr9	RP11-305L7.3	TCAGCCTCTTTGGGGTTTGGGTTCTGACCAAGTAAATCGGGAATGTTGTTAACATATCAA	506	ENST00000457976	Ensembl	-	93925369	93881419	noncoding
ASHG19A3A049388	5	5.57805	5	23.7972	20.1516	13.9755	24.808	2.37766	2.67965	2.39437	4.37045	4.20673	3.5865	4.36927	A	A	A	P	P	P	P	chr13	RP11-374F3.3	TAATTAGGGGCCAGAGGAAAAGGGTGTGAAGACCATGTCAAGATTTATGCCTGTGAGATG	430	ENST00000412722	Ensembl	-	30894040	30890496	noncoding
ASHG19A3A016519	69.4492	70.0365	72.0359	885.049	895.551	927.926	968.485	6.24892	6.26359	6.33178	9.85985	9.91901	9.93817	9.93359	P	P	P	P	P	P	P	chr2	AC009299.3	GCATTTATTGGTACATAGTTAATGCTTATACACAGGCTTCAGTGTAACACCTATACACTA	2333	ENST00000439050	Ensembl	+	162105561	162101249	noncoding
ASHG19A3A038042	15.4628	28.8959	27.7324	75.1152	58.9154	51.3619	15.5547	4.11857	5.0791	5.01757	6.10574	5.8152	5.58216	3.62464	P	A	P	A	P	P	P	chr9	RP11-423C15.3	AGATTCATTGAGCTCACCCTAGATGAGTCCTTTGGTTCGGTGGTTCGGAAAAGTCTCTTT	509	ENST00000444800	Ensembl	-	128508019	128506032	noncoding
ASHG19A3A055256	584.786	560.516	520.201	394.947	388.406	386.211	253.073	9.13083	9.0742	9.01633	8.61453	8.64166	8.60586	7.88864	P	P	P	P	P	P	P	chrX	LOC554203	ATTGTTTGTTTGAAATTGCATTGACGACTGGTACTGGCTCCTGTATCACCCAGCTCTGGA	2212	uc004ebo.2	UCSC_knowngene	+	73220326	73164158	noncoding
ASHG19A3A039746	24.2618	36.7914	16.6227	44.294	41.2238	39.3197	34.4653	4.7712	5.40014	4.3131	5.31218	5.27805	5.18478	4.87376	P	P	A	P	P	P	P	chrX	RP11-265P11.1	AATAAAAAGTCCAGGAGGTTCTAAGGGAGCCCTGGGTCTTACCTGGAATTGTGTGTTACT	828	ENST00000438026	Ensembl	-	39159040	39085355	noncoding
ASHG19A3A009395	60.8218	69.7942	48.7754	209.758	183.431	159.809	135.198	6.0528	6.25938	5.79651	7.64428	7.51488	7.27927	6.93142	P	P	P	P	P	P	P	chr1		ATTAAGTAGGAGGTTCAGGGCTAAGCTAATAACTCGCCTGCCTTTCTGACTGATCACAGT	354	HIT000395572	H-invDB	-	200443559	200443206	noncoding
ASHG19A3A050378	285.008	276.71	273.925	49.0124	47.7798	56.2197	66.7943	8.16738	8.12836	8.15582	5.46342	5.49852	5.71928	5.86936	P	P	P	P	P	P	P	chr13	MIR17HG	GGAAAGAAAGCACTTAACATTTTAGGAATTCTTTTTAAAGCTGCTTGCAAAGTGTTGGTG	5018	NR_027350	RefSeq_NR	+	92006829	92000073	noncoding
ASHG19A3A037109	168.81	149.93	161.484	271.545	250.109	261.71	307.301	7.47014	7.30118	7.4382	8.04248	7.99492	8.02299	8.1809	P	P	P	P	P	P	P	chr9	RP11-29B9.2	GAACTAAGAATGAGAGCCTTTCCTGCCAAGCCCATTCTGTGCCAGTCATCATAAAATACT	501	ENST00000435444	Ensembl	-	7961080	7960412	noncoding
ASHG19A3A044505	105.693	96.292	105.735	162.403	156.83	169.075	178.549	6.83083	6.70328	6.86441	7.26027	7.28085	7.36157	7.35137	P	P	P	P	P	P	P	chr10	RP11-57H14.3	GGAAAGATCAGCTCTGCCATTTGAAACACCCAACTGCTACCTTCTCTCAGAAATCAAAAG	317	ENST00000428766	Ensembl	+	114665870	114648491	noncoding
ASHG19A3A000387	351.826	361.669	392.769	676.519	581.672	638.198	713.121	8.46442	8.49675	8.65509	9.44336	9.26575	9.37136	9.46954	P	P	P	P	P	P	P	chr7	AC068610.3	ACTAACCATCCAGCACCACTTAAAGCCACACTCTCCTCTTTGGTCTTTCCTGGTACGCAG	685	ENST00000467677	Ensembl	+	114765997	114719072	noncoding
ASHG19A3A044557	76.3623	70.0782	66.5837	137.19	120.492	120.115	147.211	6.38782	6.26444	6.22253	6.99919	6.88268	6.84678	7.06442	P	P	P	P	P	P	P	chr10	RP11-245J24.1	ATACCTCCGTGTGCATAATGGTTGTACCTGCTCCAGGAAGGCGCTGGATCCTCCCAACTC	556	ENST00000436430	Ensembl	+	120027222	120001163	noncoding
ASHG19A3A046504	109.804	99.1144	104.036	430.118	423.214	463.607	457.912	6.88169	6.74163	6.84071	8.7451	8.77237	8.88905	8.78327	P	P	P	P	P	P	P	chr1	RP4-794H19.1	ACTGAGGCTTCAGAAGAGTTTGGGAGCTGCAATTCATCCACACACGCATTCATTTTCAAG	1211	ENST00000423408	Ensembl	-	59362337	59348539	noncoding
ASHG19A3A018102	45.3912	56.1207	42.5445	119.753	101.679	109.027	128.908	5.64922	5.96287	5.60895	6.79716	6.62637	6.6981	6.85432	P	P	P	P	P	P	P	chr20	BC090059	AAATTGAAGAAAGACACTTCCAGTTTTCAGAGGGAGATCCTCTGCCACAAGAGAACAGCC	1294	uc002wrm.1	UCSC_knowngene	+	19790937	19780217	noncoding
ASHG19A3A018720	18.4424	10.7932	5.3505	25.7923	15.8481	22.8365	28.6767	4.36901	3.85683	2.8641	4.49491	3.82807	4.36673	4.59096	A	P	A	P	P	P	P	chr21	AL035610.2	AACTTGCATGGATGCTCTGAAGCAACTTTGAGGTCTCCTTGATGAGGAAAGTTGGCTCAA	443	ENST00000437194	Ensembl	-	29600799	29584624	noncoding
ASHG19A3A039083	90.0906	90.3149	82.0712	60.3595	52.9467	51.4429	19.3174	6.60944	6.61171	6.5174	5.77517	5.64965	5.58482	3.97072	P	P	P	P	P	P	P	chr9	RP11-308N19.4	TACAAACACGCCCACAGAACCAAACCAAGCGGACAAGGCTTCAAGGAGAGCTTCTGGGCG	690	ENST00000411451	Ensembl	+	109464943	109427030	noncoding
ASHG19A3A048574	14.5718	19.6284	9.9197	19.0575	24.7387	18.4203	25.8187	4.04184	4.58367	3.60858	4.029	4.50654	4.03179	4.42735	A	A	A	P	P	P	P	chr1	RP5-898J17.1	AAAGGGTGATTACTAGAGATAATAAGGGGGAGAAGCCTTGGTGAGCATCCTGGACCATTT	1994	ENST00000435311	Ensembl	-	96839681	96719624	noncoding
ASHG19A3A050121	28.1275	21.3315	18.3642	228.92	226.306	253.553	238.783	4.9764	4.68698	4.44685	7.78128	7.83396	7.97657	7.7982	A	P	P	P	P	P	P	chr13	RP11-478K15.2	TACTCGCTTAGAGGGTGAAAAAAGTGAATTTGCCTACAGGGCCAATTTGGAAGCACCTCT	266	ENST00000437867	Ensembl	+	44813010	44717728	noncoding
ASHG19A3A017142	21.7236	15.7576	9.37868	31.9358	34.9683	33.0148	5	4.60447	4.30751	3.53211	4.8215	5.03014	4.92007	2.32841	A	P	A	A	P	P	P	chr2	AC006037.2	TACTGTTCTCTTCTGTCATGTAAGAGTGGGCCTTGGGCATGAAGGCTGAAGAATTTAGAG	598	ENST00000437967	Ensembl	+	235018125	235017359	noncoding
ASHG19A3A020257	110.276	109.643	139.105	168.725	176.037	114.47	200.881	6.887	6.87742	7.23951	7.31871	7.45427	6.77022	7.53372	P	P	P	P	P	P	P	chr22	CTA-796E4.3	GCTCACTTTGTATTCTGTAAACTTTCAGTTGGAAAATAAACACACTGTCTCCCTGTCAAA	188	ENST00000420391	Ensembl	+	26560269	26557799	noncoding
ASHG19A3A030413	88.2915	78.5328	81.6548	102.212	99.9662	123.443	122.666	6.58241	6.41956	6.50976	6.56563	6.59919	6.8879	6.7855	P	P	P	P	P	P	P	chr6	BC037331	CGACACATTATCAAAGGACTATCTTGGACCTTCTCATCCCAGCAAACATCCAATGGAGAA	2746	uc003pwa.2	UCSC_knowngene	-	114194512	114189182	noncoding
ASHG19A3A019191	50.7737	37.3962	43.1998	28.0578	25.4095	13.1845	26.9582	5.80427	5.42205	5.62976	4.62299	4.54604	3.48868	4.49089	P	M	P	M	M	A	M	chr21	C21orf82	TGGGTATGTGTGACATCAACAAGAAGCAGCAGACAAAACAAAATATTTTCACAAACATTC	673	NR_027267	RefSeq_NR	+	35555545	35552977	noncoding
ASHG19A3A042710	324.098	413.539	261.317	1646.55	1585.45	1509.25	1293.77	8.35179	8.67787	8.0871	10.7806	10.756	10.6616	10.3763	P	P	P	P	P	P	P	chr10	FAM25E	GAATGCACCTGCTACCATGGCCCACCCTTCCCAAGTCTCAATAAAAAGCCATGAAATATG	322	ENST00000411791	Ensembl	-	46312772	46310875	noncoding
ASHG19A3A016235	793.419	877.693	699.134	1498.25	1412.23	1432.16	1626.45	9.54333	9.69185	9.42534	10.6499	10.6043	10.5894	10.708	P	P	P	P	P	P	P	chr2	FAM138B	TGTGGTCTTGTCTATTCCCACTCCCTGCCTGACTGAACATTTTCTCCACCTCCTGATCAT	1130	NR_026821	RefSeq_NR	+	114336428	114334958	noncoding
ASHG19A3A016444	27.439	23.6389	26.5206	40.2716	41.705	33.9615	41.0788	4.94364	4.81654	4.95735	5.16411	5.29383	4.96208	5.14136	A	P	P	P	P	P	P	chr2	AC074093.1	GATTGTTGAGATCTGGCGACTTGTTTAAATTTCATCAGCCTCACTTCTATGAACTCTCAG	2098	ENST00000451774	Ensembl	+	145831662	145425592	noncoding
ASHG19A3A039324	3070.92	3051.25	2982.67	6358.85	5512.3	5984.09	6349.57	11.4272	11.4255	11.4517	12.7707	12.6003	12.6883	12.7011	P	P	P	P	P	P	P	chr9	RP11-492E3.1	AATGTAGTGTCTTTAGACCGTGCAATGTTGTGCTCCTGTTAGTCTGATATCAGGGGCTTG	1959	ENST00000419300	Ensembl	+	132267360	132251378	noncoding
ASHG19A3A011680	48.4101	22.8627	47.9816	80.0756	76.6519	79.7858	89.6517	5.73905	4.7712	5.77433	6.20706	6.20684	6.23494	6.30855	A	P	P	P	P	P	P	chr1	RP11-496N12.6	TCTGTAGCATTTTCTTTCTGGCAACAACGGTTGGGGTCATTAAAAGTGTCTTTGAAATGC	397	ENST00000428642	Ensembl	-	225653045	225634944	noncoding
ASHG19A3A044181	64.9812	55.6047	57.9124	140.254	134.428	129.31	174.069	6.15159	5.95121	6.03314	7.03357	7.04675	6.95633	7.30926	P	P	P	P	P	P	P	chr10	MBL1P	TAAAATGCCATTGCCTCCAAAACAAAGCTGTTCGTGGACTCTCTGGGATCCCATATTTCC	1424	NR_002724	RefSeq_NR	+	81682875	81679933	noncoding
ASHG19A3A031644	18.8011	22.3791	25.601	80.9875	50.1265	57.4932	45.1689	4.39956	4.74398	4.90491	6.22519	5.57005	5.74976	5.28242	A	A	P	P	P	P	P	chr6	RP11-411K7.5	AAGTCAGTTTGTATGCATGCCTTGGATTGAGAGACATGAACATTTTGGACTGGAGGTGCG	643	ENST00000441845	Ensembl	+	53871950	53863687	noncoding
ASHG19A3A032557	4135.62	4108.9	4362.27	3895.23	3651.24	3767.58	3943.35	11.8506	11.8506	11.9953	12.0393	11.9739	11.9924	11.9875	P	P	P	P	P	P	P	chr7	AC004485.3	AAATCAATGTTAGTTCCTGACCGCTCCCCCTCTCTGTGTATTGGTCAATCACTGTCTGAT	527	ENST00000439839	Ensembl	-	24295338	24236280	noncoding
ASHG19A3A032077	9.85392	5.31498	8.38645	73.9243	83.3911	76.537	84.5369	3.50495	2.33452	3.37913	6.08391	6.33307	6.17447	6.22293	A	A	A	P	P	P	P	chr6	RP3-523C21.1	TCTGTCTGATGAGGAGAATAAGAGCCAGTTTGTGGTATTGACAGAAGAATGAAAGTAAAG	569	ENST00000443303	Ensembl	+	132490514	132455550	noncoding
ASHG19A3A031764	185.45	186.323	198.58	268.116	247.371	266.304	290.348	7.59853	7.59662	7.72151	8.02442	7.97646	8.05132	8.09765	P	P	P	P	P	P	P	chr6	RP11-250B2.3	AAGCTTTCACTGGGAGATTATGAAGGGTAGATGCTTTGTGTCTCCATTGCCTCCTGTGAT	682	ENST00000452402	Ensembl	+	81175644	81153060	noncoding
ASHG19A3A030851	96.1445	88.7521	94.3876	206.462	189.023	188.257	213.256	6.70352	6.58725	6.70674	7.62	7.56071	7.52435	7.6221	P	P	P	P	P	P	P	chr6	RP1-137D17.1	AAGCACTTTTGCATCTCTTTCCTGCCCAGAAGCGACCAGAGAGGCCAGGCATTGTCACCT	588	ENST00000433388	Ensembl	-	169788480	169770092	noncoding
ASHG19A3A045288	158.597	167.127	172.939	150.567	132.827	154.148	153.796	7.37899	7.4473	7.53195	7.14163	7.03139	7.22297	7.13084	P	P	P	P	P	P	P	chr1	MGC12982	GAAAAGTTATCCAGAGACTTTTAACCTCCGGACTCCACTCTTCGCTTATGTTTGCTTTTT	2527	NR_026878	RefSeq_NR	-	47900313	47897807	noncoding
ASHG19A3A013363	56.7765	41.9316	43.6857	67.4579	57.3603	59.7288	82.9857	5.96138	5.5742	5.64468	5.93938	5.778	5.80546	6.1938	P	P	P	P	P	P	P	chr2	AC012506.1	ATCCTGGATCACTCTGAGAGGTCACTGGAAAAGAACGAGAACAGCTTTCCCCATTTCTTA	525	ENST00000423706	Ensembl	-	23554915	23553534	noncoding
ASHG19A3A033488	1198.31	1245.29	1224.64	2683.89	2514.15	2361.73	2738	10.0992	10.1624	10.1877	11.491	11.4364	11.3204	11.4605	P	P	P	P	P	P	P	chr7	AC000123.3	AAATCACTGTATGAATAGTGAAAGCTGGACTGTAGCACCAATAATAAATGCTCTTCTGTC	461	ENST00000467630	Ensembl	-	126990347	126989886	noncoding
ASHG19A3A031483	16.1997	10.6368	11.0707	19.7969	26.899	26.0448	31.7478	4.18057	3.8412	3.75885	4.08689	4.63303	4.56566	4.74689	A	A	A	P	P	P	P	chr1	RP1-140J1.1	TACCAACAACAGTTTACCCTTACCTGGAAGAAGAGCCTTGGAGGAGAAAACACACCATGT	2254	ENST00000427145	Ensembl	+	153164152	153146993	noncoding
ASHG19A3A018061	66.1043	85.334	69.9428	129.763	117.761	123.564	136.735	6.17719	6.53204	6.29032	6.91629	6.84909	6.88922	6.95211	P	P	P	P	P	P	P	chr20	RP5-1069C8.1	AATCTGCTCACCTGAAAGGCTCACTCCTGTTGTAATAAATGACACATAAGGTCACAATTC	484	ENST00000449841	Ensembl	+	12917842	12916686	noncoding
ASHG19A3A013244	112.235	97.5723	59.3649	173.414	153.21	134.49	38.4512	6.91048	6.7208	6.06468	7.35708	7.24599	7.01499	5.03808	P	P	P	P	P	P	P	chr2	AK124409	ATGCTCTCTGTTCCCTGTGAGAAGAAGGGGTTTCTTTTCTTCTGGGATGATTCATCCCTT	2130	uc002qym.1	UCSC_knowngene	-	6910442	6869300	noncoding
ASHG19A3A019121	27.6938	29.2961	92.4183	48.5045	40.7417	34.8749	58.3818	4.95565	5.09581	6.67543	5.44496	5.25898	5.00149	5.66805	P	P	P	P	P	P	P	chr21	AJ006995.3	AGAAATGGAATGCAGCTGAGAGAATCTAAACTCTTCCTCAACCCTTGGAGGAGGTCTCTT	572	ENST00000433344	Ensembl	+	29357614	29327239	noncoding
ASHG19A3A030574	873.505	848.56	830.418	873.164	896.562	785.985	1033.55	9.67194	9.64576	9.6657	9.83703	9.92164	9.68711	10.0343	P	P	P	P	P	P	P	chr6	RP11-394G3.2	TCTATTCTCCCTACTCCCATATTCTTCCAGTGGGACAAAGTGCCCCAAAGTATAAGTCAG	777	ENST00000447848	Ensembl	-	136129604	136128285	noncoding
ASHG19A3A032120	3742.28	3614.45	3240.38	75.063	79.3433	72.0404	68.0303	11.7005	11.6616	11.5615	6.10496	6.25689	6.09486	5.89648	P	P	P	P	P	P	P	chr6	RP11-95M15.1	AACAGATAATGCAACTCAGTCTACTTGGATGTTCACACCTGAGACTGGAGAAGACCTGCT	523	ENST00000440397	Ensembl	+	137995691	137994596	noncoding
ASHG19A3A038829	37.0976	45.28	19.3773	93.1306	88.5233	87.9833	52.6629	5.36358	5.67718	4.52679	6.4318	6.41694	6.37666	5.51439	P	P	P	P	P	P	P	chr9	RP11-394O9.1	TCCAGGAATGCGATGAAAAGATCTGTAAGAGAGCACAGCCCCTGTTGATTGACTTGTCTT	446	ENST00000417801	Ensembl	+	82649470	82645493	noncoding
ASHG19A3A017525	460.605	457.686	443.191	628.797	570.649	574.132	656.303	8.82472	8.81132	8.80927	9.33107	9.23452	9.21787	9.33892	P	P	P	P	P	P	P	chr20	RP4-610C12.3	TATTTATAACTCCCTCTATAACTCTCTGTTTGGAGACACTGTGGCTCTATTGACAGACTG	553	ENST00000454331	Ensembl	-	29522987	29521636	noncoding
ASHG19A3A042681	91.7532	394.94	88.4913	172.103	150.706	170.423	162.216	6.63579	8.61533	6.62208	7.3474	7.21926	7.37327	7.2052	P	P	P	P	P	P	P	chr10	RP11-20J15.3	CCTGGCCAGTCTGTAGAATTTGGCAAAGATGAGGCACCTTATAGCCTTACATGTTCTTAT	915	ENST00000452578	Ensembl	-	44789157	44787705	noncoding
ASHG19A3A053526	8.66472	15.9061	15.4797	34.2069	31.3666	27.3871	30.3204	3.3214	4.31799	4.21595	4.92062	4.86825	4.63876	4.673	A	A	A	P	P	P	P	chr1	RP11-66D17.5	AGATAGCTTATGAGGAGATTTGGCCCACAGAGACCATAAGTGCCCTCAAGCAACAAGAAA	433	ENST00000428641	Ensembl	-	156682966	156682003	noncoding
ASHG19A3A017155	675.198	780.237	629.261	854.903	789.905	805.665	549.598	9.33083	9.52168	9.28336	9.80536	9.72781	9.72489	9.06906	P	P	P	P	P	P	P	chr2	AC011286.1	AATTGGAATGTATTTTGAAGCCCCCCATACAGCCCCCTGTTGTCATTGACCCTAAATCTG	561	ENST00000455068	Ensembl	+	237661449	237642024	noncoding
ASHG19A3A050383	14.0583	7.17296	24.0949	31.2412	33.3451	28.3542	34.9829	3.99287	3.42036	4.81629	4.78543	4.9543	4.69286	4.89524	A	A	P	P	P	P	P	chr13	RP11-632L2.1	CAGAATTCAAGCAGTGAAGGATAATGTTTTGTTTAAGTTGTCAGTGTTCACCCTTCAAAA	210	ENST00000443228	Ensembl	+	93710179	93708909	noncoding
ASHG19A3A042284	19.164	18.8755	15.4578	46.6317	48.8633	65.8255	53.3889	4.42797	4.53423	4.21422	5.38773	5.53001	5.9587	5.53622	A	P	A	P	P	P	P	chr1	RP11-439E19.7	TGACAACCACCAGCAGCTACAATCATGCCGAACCAAGAACCAGAGGATTCAGTAACTTTA	522	ENST00000442712	Ensembl	+	246855123	246853348	noncoding
ASHG19A3A018703	45.1217	37.8195	37.6898	54.3368	75.2047	79.9942	94.8899	5.64069	5.43713	5.44214	5.61878	6.17896	6.23874	6.39144	P	P	P	P	P	P	P	chr21	AP000221.1	GTCTGCTTCAGATTCTTCTACTTCTTGGCCATCTTTATTGGGAAAATAAGTATGTGAAAT	1046	ENST00000419694	Ensembl	-	26890650	26887784	noncoding
ASHG19A3A031204	20.146	36.1923	16.9297	74.5728	61.3741	56.3487	36.6862	4.49861	5.37868	4.33786	6.09446	5.8789	5.72294	4.96804	P	A	A	P	P	P	P	chr6	XXbac-BPG13B8.10	TAATCAAATCGTATAACAGAAGAGGAAGTCCCATCCTGCCGAGGATCCTGGATGTGAGAA	877	ENST00000436804	Ensembl	+	29478333	29465285	noncoding
ASHG19A3A020014	156.68	180.635	149.503	283.817	330.993	240.645	339.908	7.36458	7.55359	7.33811	8.11216	8.41024	7.89504	8.32829	P	P	P	P	P	P	P	chr22	CR605662	CCTGTTCCACATCTATGCATTCCCCATCTATCTAATGTATATTCAGACACAAATGTATAT	1732	uc002zll.1	UCSC_knowngene	+	16377057	16373080	noncoding
ASHG19A3A028610	5.83874	5	5	516.35	554.683	571.542	618.118	2.8614	2.32192	2.39437	9.03887	9.19299	9.21112	9.24571	A	A	A	P	P	P	P	chr1	RP4-666F24.3	TTATACCTGCTTGTGGGGACATGAGTGAAGAAAGAGAGGGGACTTTGAAACAAGAGAAGA	491	ENST00000448680	Ensembl	+	115645279	115642292	noncoding
ASHG19A3A043356	51.117	53.178	63.5745	78.5817	74.3662	68.4983	79.9736	5.81298	5.889	6.15828	6.17753	6.1611	6.01403	6.1426	P	P	P	P	P	P	P	chr10	RP11-498J9.2	GCTGCCTGCAGCTGGAGGCCACAGGCCCCCCATGTTGAAGAAGTGTCACCTTCAAAGGGA	229	ENST00000437838	Ensembl	-	120763396	120763047	noncoding
ASHG19A3A031705	31.3077	32.2862	36.3685	65.243	52.4618	60.3684	66.6066	5.12498	5.22732	5.39178	5.89061	5.63641	5.82252	5.86473	P	P	P	P	P	P	P	chr6		TTTGTGGTCTCAGCAGAGTCGGTAGTTTTCTTCATGTTGGTCTTCATGTAATACTTGTAT	1241	L08443	misc_RNA	+	72072825	72071634	noncoding
ASHG19A3A042007	29.723	16.1294	20.1706	56.9471	40.0647	93.3598	45.6651	5.05606	4.33653	4.58082	5.68474	5.23237	6.46869	5.29689	A	P	P	P	P	P	P	chr1	AK125357	TTCCTGTAAAACAAATTGGCAAATTGTCACCTTCAGATGGACCACAGCTGGCCCTCTGAA	3574	uc001hwj.1	UCSC_knowngene	+	234867390	234861147	noncoding
ASHG19A3A044092	507.719	577.491	449.581	538.26	527.436	488.092	389.618	8.94702	9.11266	8.82895	9.0998	9.12509	8.97023	8.53407	P	P	P	P	P	P	P	chr10	RP11-472G21.2	GGCTGTGCAGCCAAAATTTGCAATTCTTCCCCCAGCTTTTAAAATTGTAGTAAAATATAT	525	ENST00000441348	Ensembl	+	73638865	73638113	noncoding
ASHG19A3A031976	21.0544	17.9868	24.2547	47.2423	48.0762	40.6662	59.6196	4.56032	4.47602	4.82741	5.4078	5.50748	5.23127	5.69844	A	P	P	P	P	P	P	chr6	RP3-446I19.1	AGGAAGACTCTCATCTTTGCCTCGGTGACAAAGCTATGTATGACATTACTCAAAATCTCA	559	ENST00000451415	Ensembl	+	114560363	114551304	noncoding
ASHG19A3A049788	22.8031	62.4642	22.0796	38.1736	49.0104	38.1062	46.2519	4.67992	6.10684	4.69909	5.08542	5.53394	5.13719	5.31731	P	P	P	P	P	P	P	chr1	BC006361	ATCTGTGGACAGGGGCCATGCTCCTGGGCTTCCAAAGTTGGAGAAAGCTGCCAGGCTCAG	1317	uc001abo.2	UCSC_knowngene	-	714006	700236	noncoding
ASHG19A3A030150	75.4196	80.4921	72.3306	146.147	124.385	126.668	134.244	6.36742	6.45182	6.33816	7.0984	6.93158	6.92694	6.92011	P	P	P	P	P	P	P	chr1	RP6-74O6.3	TTCCTCAGAAGAAGAGTTCCAAACAAAAGATCTACTACCCTGAGAAGCGGTGAAGTGCTC	439	ENST00000422157	Ensembl	+	147498172	147496675	noncoding
ASHG19A3A031856	20.9467	33.1622	19.9663	39.514	29.6876	36.8245	39.8281	4.55331	5.26312	4.56618	5.13763	4.78514	5.08728	5.09091	P	P	P	P	P	P	P	chr6	AK091365	TGTCAGAAGGCATCAGAGGTGGTTTTGACTCCTTATGTCTTGGACCTGTGCACAAAAAGT	1984	uc003ppd.1	UCSC_knowngene	+	98156726	97753512	noncoding
ASHG19A3A050243	60.8569	61.6757	68.787	186.555	123.575	103.025	144.61	6.05376	6.08971	6.26836	7.47048	6.92092	6.61613	7.03577	P	P	P	P	P	P	P	chr13	RP11-521H3.1	ACAAAACACTTTCGACGAAGGTCCTGCTGCTTGTCTTCAGCTTGGTACCAATTAGAGCTT	324	ENST00000455894	Ensembl	+	61268662	61259332	noncoding
ASHG19A3A019880	1385.68	1116.36	1056.55	2288.51	2134.54	2029.13	2218.88	10.3029	10.003	9.98182	11.2647	11.1918	11.0911	11.1589	P	P	P	P	P	P	P	chr22	Z83851.1	TTTAATAGAAATGCTGAGTTTTATGAAACTAAAGTGGCTAATAAATCAGACCTGAAGCTT	475	ENST00000412060	Ensembl	-	42765214	42760407	noncoding
ASHG19A3A043987	5	5.53552	5	16.914	17.1491	13.8428	18.8229	2.37766	2.61123	2.39437	3.84454	3.95295	3.56885	3.92865	A	A	A	P	P	P	P	chr10	RP11-135D11.2	CAGGAAGAAGAGACAGCATGAGCAAAAGCATGAAGATCAGAATTCAAAGAGGATGCTGCT	537	ENST00000450677	Ensembl	+	61371006	61348907	noncoding
ASHG19A3A018901	6.33694	5.52453	5	19.1172	27.9292	18.3562	16.9117	2.95138	2.5926	2.39437	4.03472	4.69236	4.02662	3.76195	A	A	A	P	P	P	P	chr21	C21orf130	AACAATCGTAGGACGATGACAAGGTTTTGGCAGCTGCAATCTTAAAGACCAGGAAGTGAG	349	ENST00000435493	Ensembl	-	42519350	42515068	noncoding
ASHG19A3A030423	12.0425	9.15549	9.09338	15.4822	27.8344	20.3654	24.7714	3.76879	3.67452	3.49064	3.70272	4.68652	4.18783	4.36697	A	A	A	P	P	P	P	chr6	RP11-282C5.1	GGGAATAAACTCAAGTAAGGGGTCATGTCCTGTTTAGAAGAAACAATCATTTTAAGAGTA	283	ENST00000446525	Ensembl	-	115955355	115954705	noncoding
ASHG19A3A043452	28.2205	30.7886	36.8443	41.9024	37.34	39.6748	53.0796	4.98169	5.16052	5.4104	5.22456	5.12886	5.19728	5.52737	P	P	P	P	P	P	P	chr10	RP11-540N6.1	TTTCTTTTTCAAAAGCGAACAGCTACAGTATCCATCATACTCCAGAGCAGCCCTCAAAGC	297	ENST00000439421	Ensembl	-	132281418	132237330	noncoding
ASHG19A3A044279	64.2358	54.0569	57.5553	175.098	140.91	156.009	167.289	6.13317	5.90926	6.02325	7.37327	7.1201	7.24303	7.24978	P	P	P	P	P	P	P	chr10	RP11-94M14.2	AATGAAAAAGTATCACAGCTGAGACAAAGCTCCTCAGCCTCAGCATGTTTGTCAGTGTGC	784	ENST00000439157	Ensembl	+	92290873	92214454	noncoding
ASHG19A3A007409	1192.12	1181.44	1214.35	428.922	424.622	413.402	513.672	10.0917	10.0864	10.1751	8.74021	8.77784	8.71211	8.95926	P	P	P	P	P	P	P	chr10	C10orf75	ccaaggaacatcttgccaatttcaaatcggataggaGtgtcaggcctctgagtccaagct	1003	NR_026762	RefSeq_NR	+	102148110	102133332	noncoding
ASHG19A3A032309	772.837	788.414	849.414	908.985	894.701	938.028	889.207	9.50673	9.53645	9.69475	9.90246	9.91713	9.95626	9.80475	P	P	P	P	P	P	P	chr6	RP5-826L7.1	AGTATTAGGAATAAGGCCCCACCACCACCCCAACACACTTTTAAATAATAAGACGTTCAG	600	ENST00000446476	Ensembl	+	164009197	164007614	noncoding
ASHG19A3A050863	67.4209	54.4626	54.0377	172.258	153.445	178.659	169.422	6.20816	5.92006	5.93425	7.3489	7.24849	7.4447	7.26801	P	P	P	P	P	P	P	chr1	BC070106	GGATCCCAGCGGTGGTCGTGTAGCTGAGCAGGCCTGGGGCTTGGTTCTATGTCCCTGTGG	1888	uc001ejn.1	UCSC_knowngene	-	143467651	143424332	noncoding
ASHG19A3A000302	92.6754	102.09	64.5172	218.139	245.532	218.233	182.008	6.65157	6.78099	6.17832	7.7035	7.96512	7.74767	7.38162	P	P	P	P	P	P	P	chr10	ANTXRL	TGTCAGCATCACCAGCACCACATGTACTGTCAAGGAGCCACCACCTGTGCAGAAGCCAGA	506	ENST00000447511	Ensembl	+	47681735	47668556	noncoding
ASHG19A3A042360	67.3664	43.9901	49.925	94.4998	71.5022	70.6006	90.743	6.20639	5.63576	5.82751	6.45392	6.10027	6.06417	6.32471	P	P	P	P	P	P	P	chr10	RP11-482E14.1	TATTCCTGTGACTGCTGCACATTTGCCTTATCTCAGCAGTATGCCTGTGTCACTTTTTTG	832	ENST00000413993	Ensembl	-	3545030	3529085	noncoding
ASHG19A3A009269	81.0966	87.8979	73.1765	107.205	93.3404	97.0311	109.005	6.47149	6.57268	6.35666	6.63546	6.50046	6.52456	6.60342	P	P	P	P	P	P	P	chr17	AC087393.1	ACTGCTCAGCAATTTTCTTGGAGACCTCAGTGCTCATGTTATTCTTTCCTCTATCTTATG	750	ENST00000456235	Ensembl	+	20993928	20978868	noncoding
ASHG19A3A011163	17.7515	14.28	13.4154	49.305	30.6861	72.9297	48.7704	4.31542	4.19015	4.01134	5.47437	4.83469	6.10858	5.39556	A	A	A	P	P	P	P	chr1	RP11-392O17.1	AGTGAAAATGGAAGAGACTGCTTGCTGGGTGTTCGTCAAAATGGAGTTAGATGGTCTGTC	811	ENST00000441790	Ensembl	-	219585283	219583022	noncoding
ASHG19A3A038291	24.1016	16.6872	14.8795	48.2624	58.4485	49.258	46.8472	4.76178	4.38145	4.16003	5.43581	5.80513	5.5223	5.33748	A	P	A	P	P	P	P	chr9	RP11-143M1.2	AGTGAACGCGTTGGGAACAATATGGAAAACTGGGAGCCGCCTTGGAATCTACAGGGCCGG	394	ENST00000429980	Ensembl	+	88826	72700	noncoding
ASHG19A3A049606	159.529	143.039	153.701	366.793	370.701	362.455	395.38	7.38922	7.24105	7.37658	8.50592	8.57237	8.50886	8.55649	P	P	P	P	P	P	P	chr13	RP11-24H2.2	AATGACATCCACAAACCTCTTCTGCTGTATACCTGGATGAAAGCAAGGCTAGCTGTGTGT	577	ENST00000417989	Ensembl	-	53725943	53720673	noncoding
ASHG19A3A032355	64.515	66.5573	61.0231	101.477	103.047	91.2345	105.793	6.14029	6.19344	6.10645	6.55469	6.64515	6.43329	6.55892	P	P	P	P	P	P	P	chr6	RP11-302L19.1	CAGTCACTTCCGCTTGTACTAATTCTGGCCCAACCGTTCATTATATTTTTACAATTCTTA	429	ENST00000429305	Ensembl	+	170478251	170477740	noncoding
ASHG19A3A053413	114.7	108.622	83.3391	36.9039	37.0969	29.5474	24.8269	6.94268	6.86318	6.54024	5.03264	5.11776	4.75575	4.37094	P	P	P	P	P	P	P	chr1	RP11-98G7.1	AGATCACTTTGTGCTCCTGTGATCTGAAGGCTGCGTGAAGAAGATGAGGCTTGGAAAATA	523	ENST00000441085	Ensembl	-	156426258	156416203	noncoding
ASHG19A3A016046	23.0572	18.9608	11.0391	47.8341	45.0814	39.9793	42.757	4.69681	4.53981	3.75554	5.42444	5.41285	5.20866	5.20117	A	P	A	P	P	P	P	chr2	BC105019	AAAGGAATTATTTCCACGAGACAAGCACGCCAGCCATTGGCTCATAATGAGCTGAAAGAC	3115	uc002taj.1	UCSC_knowngene	+	100867946	100824715	noncoding
ASHG19A3A016128	25.2782	12.5798	25.9629	36.4699	36.4587	28.9554	44.6599	4.83036	4.03864	4.92684	5.01504	5.08993	4.72505	5.2683	A	P	P	P	P	P	P	chr2	AC096655.1	GCTTGTTCTGACAGCCTTCTCATTTGAAATCCCAGGAAATATAGATAATTCACTCTGATT	540	ENST00000441383	Ensembl	+	108438585	108370567	noncoding
ASHG19A3A017907	18.94	11.0342	18.5707	25.1775	32.09	30.1857	29.6259	4.41005	3.88592	4.46297	4.45541	4.90066	4.78935	4.64152	A	P	P	P	P	P	P	chr20	HAR1B	ATTCAGGGATGAGGTCCCCTGGGGCTAAATGAATGAACAGATTCTGAAAAGCAGAAGCTA	896	NR_003245	RefSeq_NR	-	61733671	61726844	noncoding
ASHG19A3A042643	15.5513	18.7446	17.0719	29.6493	33.5714	36.6895	45.5374	4.12665	4.52709	4.34834	4.70613	4.96569	5.08178	5.29322	A	A	A	P	P	P	P	chr10	NHEDC1P1	TTAAGAAGCATTGCCCTTAACATTATTCTAATACGAGCTGGGCTTGGACTCGATCCACAG	1524	ENST00000452667	Ensembl	-	38982200	38933912	noncoding
ASHG19A3A031356	25.783	50.6732	23.8491	71.3442	65.5685	62.637	119.887	4.85992	5.82673	4.80159	6.02858	5.97545	5.88039	6.75126	P	P	P	P	P	P	P	chr6	HCG24	ACATTTGCTTTATTTCATGGTGCTGCCCAAATTCATGCTGTACCCTCAGCAGCAAGGAGT	717	ENST00000414398	Ensembl	+	33115544	33112559	noncoding
ASHG19A3A033808	50.9524	58.8597	46.8834	89.6587	68.6451	72.7327	102.57	5.8082	6.02618	5.74107	6.37825	6.04518	6.10539	6.50758	P	P	P	P	P	P	P	chr7	AC073133.2	GAAAATCTCCTTGCAGTACCGGCCTACAAATGTACCGTTAGGAAGCTGTTCTCTTCAAGA	432	ENST00000426187	Ensembl	-	156228527	156225216	noncoding
ASHG19A3A050448	84.6676	84.2679	86.0058	269.281	249.566	282.833	294.941	6.52765	6.51266	6.58469	8.03032	7.99155	8.14438	8.12185	P	P	P	P	P	P	P	chr13	RP11-484I6.6	CTGTCAGAATCCTAATCCCTTCTGCCTGGACTCGTTACCAGTGGTAGCGAGTGTGTATAG	361	ENST00000416924	Ensembl	+	103533517	103532285	noncoding
ASHG19A3A044206	25.3238	26.5927	27.701	41.3374	35.9429	36.8718	43.1162	4.8327	4.97006	5.01577	5.20423	5.07009	5.08998	5.21342	P	P	P	P	P	P	P	chr1	RP4-739H11.3	AGAAGAAGGAAAATTCAGCAGAACCTAGGAAGTGCAACTGCTATTGCCTGGGCCTTTGTT	471	ENST00000440100	Ensembl	-	41153260	41134760	noncoding
ASHG19A3A033963	56.1282	55.1513	63.4396	86.0651	91.6962	89.8654	99.4126	5.94753	5.93737	6.15564	6.31418	6.4706	6.41122	6.45906	P	P	P	P	P	P	P	chr7	AC060834.3	CTCTACTATCATCCTGTACTGGATAGGCCCCCACAAATAATCCTGTATTTTGGTAAACCG	618	ENST00000447999	Ensembl	+	9809142	9776950	noncoding
ASHG19A3A049497	9.67055	20.0522	13.7159	14.727	20.4985	15.425	17.8964	3.47577	4.60953	4.04369	3.62072	4.23319	3.74738	3.85275	A	A	A	P	P	P	P	chr13	RP11-187A9.3	ATAGTTCCACGCAGAATCACACCATCATGTTTTAGGTTCCATCAAAAATGAATGAGGAGA	363	ENST00000413246	Ensembl	-	42618383	42617862	noncoding
ASHG19A3A015787	9.56727	10.782	10.0915	27.9371	17.8432	17.8267	23.9711	3.46084	3.85494	3.62893	4.61667	4.01697	3.9812	4.31369	A	A	A	P	P	P	P	chr2		TCAGATCCAAGTAGAGAAAACCGGGAACGGTTCCGGCTCTGGGGACTGACATTCATCGCG	341	BC127846	misc_RNA	+	70352384	70351426	noncoding
ASHG19A3A013808	375.455	388.21	377.908	669.839	633.233	613.519	683.548	8.55171	8.59036	8.60545	9.42681	9.39621	9.31743	9.40223	P	P	P	P	P	P	P	chr2	LOC100133985	TTTTCTCTACTTGGATCTGAGAACTCTGTCCCTCCAGCCCTGCGAGCGCTTTGCCAGGGT	661	NR_024444	RefSeq_NR	-	70352448	70351168	noncoding
ASHG19A3A032276	49.107	42.2467	48.683	21.7491	18.0174	21.8993	27.4688	5.76139	5.58587	5.79445	4.22846	4.03069	4.29978	4.51917	P	P	P	P	P	P	P	chr6	RP11-13P5.2	TGACCACGTTGAGAACAGATGACTGACTCCGAGTTCCATTTTCTTTAAGATATTTTGAGC	385	ENST00000419064	Ensembl	+	159588385	159586940	noncoding
ASHG19A3A009455	106.276	91.7461	119.774	242.753	198.139	242.743	237.158	6.83767	6.6356	7.03375	7.87474	7.63452	7.91211	7.78618	P	P	P	P	P	P	P	chr17	FLJ43826	TACAAGTAAAACTGACCAGAGCCCCAGGAATAAATGGTTTTCTTGGCTTCCTCCTTGCTC	3580	uc002hrd.1	UCSC_knowngene	+	37209458	37186158	noncoding
ASHG19A3A042582	55.974	46.928	41.3822	31.7012	42.1538	39.5488	50.2402	5.94344	5.72578	5.56981	4.8106	5.31	5.19262	5.44065	P	P	P	P	P	P	P	chr10	RP11-253D19.1	TTCAAAGGAGTGCATGAAAGATATCACAGCCTCACAAATGCAGAGAAAAGCCTCCCTTGG	541	ENST00000440932	Ensembl	-	30843412	30842782	noncoding
ASHG19A3A010544	37.2363	15.3518	11.883	29.8579	38.1584	31.5511	34.6957	5.36892	4.27736	3.85145	4.71602	5.16194	4.85202	4.88291	A	P	A	P	P	P	P	chr1	RP11-328D5.1	GGGGTGGGGAATGACTTCCCTATAATCAGCTATTAAAGACTTGTACCACTAATTAGTCTA	565	ENST00000435542	Ensembl	-	208052418	208047139	noncoding
ASHG19A3A031966	42.7651	51.5542	29.6017	134.375	105.597	87.9177	64.8795	5.56331	5.85117	5.10962	6.97109	6.68157	6.37561	5.82724	P	P	P	P	P	P	P	chr6	RP1-249H1.2	AATTGGACCACCATGCAGCCTGCTAATTCCTGTGATCTTTCTTCTGCTTTTGAAGAAATT	375	ENST00000456424	Ensembl	+	114158556	114113031	noncoding
ASHG19A3A019930	14.0859	8.98572	15.1545	47.8021	42.5269	46.1204	53.964	3.99587	3.65516	4.18718	5.42328	5.32154	5.42572	5.54965	A	A	A	P	P	P	P	chr22	WI2-85898F10.1	TGGCATTTATTATTTGCCCCCAGGAAGGTCTGAAGGATTTTACTTTTAAAAACCATAGTC	805	ENST00000451118	Ensembl	-	46283628	46271878	noncoding
ASHG19A3A017267	72.7929	59.5883	73.3823	159.756	155.66	149.457	175.715	6.31963	6.04134	6.36008	7.23162	7.26873	7.1758	7.32501	P	P	P	P	P	P	P	chr1	RP3-340N1.2	TAAAAGTTGAAAAACAACAGGAATGAAGTCATTGGCAAGACCAGCCGGTGCCACTGATGA	1083	ENST00000417884	Ensembl	+	20487061	20480830	noncoding
ASHG19A3A037040	11.9626	7.08799	5	36.3972	26.1096	33.8529	35.3733	3.76162	3.40487	2.39437	5.01264	4.58609	4.95735	4.91208	A	A	A	P	P	P	P	chr9	RP11-143M1.4	GACACCTGATTACAGTCTAAATAGTAACCTTATTCTGATTGTTAATGTAACCCTCTCGTA	413	ENST00000416242	Ensembl	-	113754	112715	noncoding
ASHG19A3A013558	42.23	34.7277	27.9605	226.297	185.724	151.555	97.6111	5.54469	5.324	5.02832	7.7636	7.53418	7.19551	6.4318	P	P	P	P	P	P	P	chr2	AC016735.3	AAGCCTGAAAGAGCTGCACTCTAAGCACCACAGCAGGACTTGCCCCTGAATGGAGATGGG	569	ENST00000438736	Ensembl	-	43270921	43268331	noncoding
ASHG19A3A033991	33.5538	34.3367	33.7709	44.3323	43.2668	37.8051	44.4745	5.22705	5.30702	5.28362	5.31365	5.34592	5.12462	5.26133	P	P	P	P	P	P	P	chr7	AC005550.4	AACTAAATCTTTTGTTCACCAGCTGCTCAGCTTTTCAGTCTGGGTCTGAGCTGAAACCTG	697	ENST00000442176	Ensembl	+	15735116	15728002	noncoding
ASHG19A3A020070	70.5419	110.332	24.6391	96.8344	77.8021	79.0393	105.611	6.27418	6.88608	4.84943	6.48816	6.22871	6.22074	6.55546	P	P	P	P	P	P	P	chr22	DGCR9	ACATACTTTCCATAGGACCCAGTGCTTTCATCTCCGTGCAACTGACCAAGAGAAACCAAA	2434	NR_024159	RefSeq_NR	+	19007760	19005346	noncoding
ASHG19A3A012568	8.26529	10.9431	7.97203	17.9939	18.2831	19.1465	16.9171	3.2533	3.87532	3.31596	3.93924	4.05538	4.09428	3.76258	A	A	A	P	P	P	P	chr19	AC002314.2	AATCCCTTACACAAAATCAGGGTCTAGCGTGTGTGTACATCAGTCAGAGTCCACTCTCAT	347	ENST00000450758	Ensembl	+	36199158	36198271	noncoding
ASHG19A3A020453	62.5272	65.763	72.9539	169.677	161.042	164.619	184.865	6.09402	6.1776	6.35174	7.32758	7.32254	7.32238	7.40172	P	P	P	P	P	P	P	chr22	CTA-150C2.13	ATTTTTCCCTCATATTTGAACCCCACATGCACCAAGGGCTGTTTTATGCCTTGCACATGA	678	ENST00000450216	Ensembl	+	39320713	39317231	noncoding
ASHG19A3A000120	45.6516	82.7405	42.1596	237.424	189.636	160.416	78.1438	5.65697	6.48887	5.59475	7.83736	7.56629	7.28578	6.10486	P	P	P	P	P	P	P	chr1	RP11-439L8.4	GTCTGCTTCCTCAGTGGTTCTAGAGCTGCTCAGTCGCAGGCTCCAGATGTCTGCTTCAGA	1122	ENST00000417514	Ensembl	+	31989190	31987963	noncoding
ASHG19A3A037679	93.1483	108.317	74.537	192.259	184.991	155.982	199.244	6.6601	6.85912	6.38064	7.51657	7.52806	7.2426	7.5186	P	P	P	P	P	P	P	chr9	RP11-555F9.2	TTCATCTTGGCCCTGCTTTAAAATGATGCATCTACTGTCTTCATGCCTCAGCACAGCAGA	791	ENST00000449990	Ensembl	-	93345026	93225940	noncoding
ASHG19A3A039322	42.6952	43.0699	56.0892	101.405	77.7586	84.437	99.7768	5.56116	5.60919	5.98811	6.55331	6.22816	6.31546	6.46459	P	P	P	P	P	P	P	chr9	RP11-65J3.2	CCTTATTCATCCACGTAACCTCAGCCTCTAGTGCAGCGTCCTATTTTTTGGCTTGTATTA	800	ENST00000439014	Ensembl	+	132201397	132200494	noncoding
ASHG19A3A014127	139.953	177.865	174.897	158.412	171.939	173.655	200.57	7.21211	7.53342	7.54913	7.21926	7.41989	7.4012	7.53118	P	P	P	P	P	P	P	chr2	AC068535.3	TTGCGTATGCAAGATTCGCTAGCATGTAAACTCTGTCACTGTCTCCCAAGAACACAGAAA	493	ENST00000449772	Ensembl	-	105030466	105028684	noncoding
ASHG19A3A040475	51.7341	58.7845	60.8398	103.144	83.8828	98.4124	102.989	5.83004	6.02405	6.10139	6.5792	6.34029	6.54771	6.51523	P	P	P	P	P	P	P	chrX	AC004070.1	CCAAAGCTGAGCCCAACAGTGTTCCACCCATGCTGATGAATGCAATAAAATCAGCACAAT	582	ENST00000458577	Ensembl	-	139298956	139298186	noncoding
ASHG19A3A020115	148.597	246.135	177.364	353.883	286.984	230.505	241.583	7.29062	7.97156	7.57241	8.4535	8.19834	7.83137	7.81525	P	M	P	P	P	P	P	chr22	AK094309	TGTATTCTGGTATTCTTACTACTTGAGCTCAGCTCATCGCTGTCATCTTCCCCTAAACCG	2167	uc002zsa.1	UCSC_knowngene	+	20381779	20378629	noncoding
ASHG19A3A014385	76.362	86.6517	59.0844	136.234	126.604	100.617	81.5302	6.38765	6.55091	6.06008	6.98926	6.95907	6.57929	6.17156	P	P	P	P	P	P	P	chr2	AC103564.7	AAGCGCCCGCTTTCTCGGCCCAGGCCCGCAGCCAGGGCTGCTCCGCCCGCTGCGCCCCAG	562	ENST00000437330	Ensembl	-	132589604	132587373	noncoding
ASHG19A3A018683	23.8233	23.9489	14.4614	25.7601	20.7499	17.1329	25.1771	4.74398	4.83347	4.1133	4.49355	4.25094	3.91754	4.39234	A	P	A	P	P	P	P	chr21	AP000472.2	AGTTTCTTACACATCTCTACTTTAATTATAGCAAATGGCCCATCTGCTTCAAAACCAGAA	795	ENST00000416327	Ensembl	-	23390475	23381262	noncoding
ASHG19A3A038963	720.523	703.135	693.027	626.397	604.004	567.726	617.733	9.41692	9.38045	9.41361	9.32574	9.32513	9.19928	9.24513	P	P	P	P	P	P	P	chr9	DM004128	TAGTAGGTTGCATAGTTTTAGGGCAGGGATTTTGCCCACAAGGAGGTAACTATACGACCT	103	uc004aul.1	UCSC_knowngene	+	96941210	96941107	noncoding
ASHG19A3A013507	5	12.487	8.55321	58.8316	35.9439	32.4381	23.2742	2.37766	4.03062	3.4074	5.73743	5.07013	4.89473	4.26768	A	A	A	P	P	P	P	chr2	AK057187	TCCTAATTCCAGGGAATGGAGCTAGTCATGCCACACATCTTTGCTGTTTTCACGAACTGA	1889	uc002rqj.1	UCSC_knowngene	-	38056541	38053389	noncoding
ASHG19A3A031615	6.72943	5	7.62193	18.3245	15.2829	19.0589	17.0626	3.01428	2.32192	3.2566	3.96795	3.7755	4.08607	3.77668	A	A	A	P	P	P	P	chr6	RP11-524K22.1	TTCTTCTCTGGAATGTTAATCTGCTCTTATTGGAGTTAGCAACCCCAGGAGGATCGCTTC	285	ENST00000426547	Ensembl	+	50488817	50481747	noncoding
ASHG19A3A028163	1183.21	1080.72	1047.47	2068.38	2003.6	1973.38	2034.48	10.0803	9.95981	9.97248	11.1126	11.0973	11.0494	11.0328	P	P	P	P	P	P	P	chr5	AC025171.1	TCCAATTGCCTTCTGGTCTTACAGACGGGAGAATAAAGGAAAAATGGCATCGTTTCCACC	2423	ENST00000399543	Ensembl	+	43045492	43042194	noncoding
ASHG19A3A051791	66.2985	53.56	50.5694	28.409	28.0939	18.7065	17.7446	6.18185	5.89715	5.84503	4.64165	4.70249	4.05834	3.83685	P	P	P	P	P	P	P	chr14	AL132709.9	AAACTGATTTAAGCACGCTTCCATGGTCAGAAGCCTTATGGTTGCCACAGGGTATTAGGA	625	ENST00000442197	Ensembl	+	101433377	101427363	noncoding
ASHG19A3A020346	934.537	783.405	861.935	1343.07	1117.26	1008.4	1191.13	9.76738	9.52751	9.71433	10.4893	10.2411	10.0686	10.2443	P	P	P	P	P	P	P	chr22	CTA-342B11.1	ATGTGAGGATGTTTCTGCCACTCTGGACATTAGTTTTCTCCCCTAAGTGGCTCTATCTCT	473	ENST00000430449	Ensembl	+	32366387	32359343	noncoding
ASHG19A3A020549	67.5922	76.7647	52.7945	144.53	134.636	113.396	159.27	6.21109	6.38673	5.90262	7.07983	7.04904	6.75403	7.17818	P	P	P	P	P	P	P	chr22	CTA-397C4.2	ACCCTGGAGCCTGTCATGTTACTCCAAGGCTGACTAGTCCCAGTCCCCAGTGAGAAGCAA	630	ENST00000415702	Ensembl	+	44840668	44839206	noncoding
ASHG19A3A019640	211.953	235.314	218.898	227.441	221.887	202.114	223.263	7.77387	7.91035	7.84821	7.76991	7.80386	7.62805	7.68914	P	P	P	P	P	P	P	chr22	RP1-231P7P.1	GGGGCCCGGACACATTATTTTCTCCAAGGAATTTCTTCTTTTCATTATTTCCCTCCAAAG	577	ENST00000415655	Ensembl	-	27969534	27959799	noncoding
ASHG19A3A042565	20.8488	16.2369	16.5251	32.1824	30.0249	33.2585	33.4287	4.54742	4.34613	4.30636	4.83036	4.80071	4.92851	4.82378	A	P	A	P	P	P	P	chr10	RP11-478H13.2	TCATTAGGTAAAATGGAGATGATCCCCAGGGCCATCTTGGAAACAGTTTTTGAAGTTGGT	596	ENST00000446012	Ensembl	-	29085042	29081497	noncoding
ASHG19A3A042364	70.6381	61.9359	38.8163	187.284	127.332	109.206	143.16	6.27635	6.09636	5.48235	7.47615	6.96984	6.70113	7.02329	P	P	P	P	P	P	P	chr10	LOC100216001	TGACACAGACTTCCTTAGATGTGTTGTCTTCCTGTCACTGGTGCATTCCTTATCAATGTG	2553	uc001ihe.3	UCSC_knowngene	-	4720262	4621443	noncoding
ASHG19A3A046831	289.653	278.432	296.237	131.292	115.445	110.252	130.388	8.19036	8.13759	8.26442	6.93488	6.81881	6.71395	6.87166	P	P	P	P	P	P	P	chr1	LOC388312	AAACTTCGGGGTCTACAAACGCAGGCGGGAGCTGAGCCAAAAGAGCTTGTTTGCTGGGAG	4812	uc002khh.2	UCSC_knowngene	-	679736	661139	noncoding
ASHG19A3A016232	244.969	240.371	230.179	1874.47	1769.92	1776.04	1922.83	7.96693	7.94185	7.91164	10.966	10.9147	10.8963	10.947	P	P	P	P	P	P	P	chr2	AL078621.3	ATGGACAGAGAGACAGGAGATGGTCCTTTATAATGCAGTGTGATCTGTGCTGCAATAGAG	745	ENST00000449954	Ensembl	+	114273062	114270039	noncoding
ASHG19A3A032301	21.6012	30.3434	34.234	42.4352	42.302	35.7515	39.4598	4.59518	5.14136	5.30369	5.2434	5.31507	5.04105	5.07598	P	P	P	P	P	P	P	chr6	RP3-428L16.1	TATGACGTGTTCCAAATTCAGCCTCTCACTGAACACTTCCAGAGCAAGGCAACATAAACA	573	ENST00000417479	Ensembl	+	161390803	161352111	noncoding
ASHG19A3A044574	391.712	365.065	425.192	342.519	318.769	326.859	365.055	8.60631	8.50802	8.75486	8.40049	8.35217	8.35677	8.43689	P	P	P	P	P	P	P	chr10	RP11-254K3.1	TTCACCCCCTGCCAGGCCAGTAGAGGAGCTGAAGAGTCTTCGCCATGGTTTGAGAAAAAG	479	ENST00000411599	Ensembl	+	121968507	121940741	noncoding
ASHG19A3A018410	114.933	81.4191	132.978	93.6673	102.686	99.1689	117.689	6.94579	6.46735	7.17912	6.44044	6.64022	6.55796	6.72129	P	P	P	P	P	P	P	chr20	BX648826	CCAGCTGCAGTTCCCTGACAGTCCAGTGAATTCAGCCAAAGGAAATGGCCCCACATGGAG	4087	uc002xts.1	UCSC_knowngene	+	46589679	46585042	noncoding
ASHG19A3A020033	83.452	40.5215	38.2272	82.2786	90.3962	86.5938	82.9042	6.50928	5.52596	5.46143	6.24915	6.44928	6.35483	6.19256	P	P	P	P	P	P	P	chr22	AC007064.24	CATTTCTCACTGGATCAGTCAACAAGATTTGAGTACTTTCTGTGTGCTCTGCATCATTCT	500	ENST00000442403	Ensembl	+	17352016	17350367	noncoding
ASHG19A3A030178	5	10.2141	5	54.6575	39.1055	28.5609	46.1091	2.37766	3.79751	2.39437	5.62605	5.19774	4.70382	5.31114	A	A	A	P	P	P	P	chr6	RP1-159G19.1	CAGAAGATTCCCTGATCCAATCTTTCCTTGGCACAAACTTTTAGTTATTGTGTTTACATA	481	ENST00000438797	Ensembl	-	80516942	80513299	noncoding
ASHG19A3A046559	5.62023	5.24818	5	24.1748	17.0418	22.4895	29.5861	2.81876	2.33191	2.39437	4.39234	3.9456	4.34374	4.63915	A	A	A	P	P	P	P	chr11	AP005273.1	TGTGAGCCCTTTGAAGACCTGATGGAAGCTATTGGACAGTAGAAGACACAGAGTGTACAT	522	ENST00000444862	Ensembl	+	64272858	64268324	noncoding
ASHG19A3A017642	28.2704	29.1439	28.5204	109.098	137.402	106.44	118.015	4.98379	5.08918	5.05624	6.66057	7.07914	6.66537	6.72636	P	P	P	P	P	P	P	chr20	RP11-425M5.5	TGCTGCAACAACCCAAATCCTGCAAAGCTCTGACTGAATCAGGAAAAAGTGACCTTGGTA	714	ENST00000411780	Ensembl	-	36137633	36120873	noncoding
ASHG19A3A030597	84.3816	77.8869	77.536	67.5912	67.8036	77.5588	68.2742	6.52186	6.40788	6.43513	5.94344	6.02618	6.19507	5.90377	P	P	P	P	P	P	P	chr6	RP11-356I2.1	AGAACTAGAGGTGGTGGAGTGAACGCCGCACCAGGCAATGGAAGAAGCACTGGCCTAGAC	737	ENST00000411615	Ensembl	-	138060120	138051306	noncoding
ASHG19A3A016247	17.4427	14.0205	10.2503	54.7924	53.2662	52.5549	52.5381	4.28601	4.16774	3.64958	5.62976	5.65998	5.61822	5.51094	A	P	A	P	P	P	P	chr2	CR601322	AAGTTTTCAACTGCAGATACAAACATCAGGACGTCAATGTATCTGCTAGGAGACACCCGG	844	uc002tkz.1	UCSC_knowngene	+	114764879	114737145	noncoding
ASHG19A3A000103	23.455	152.673	15.0852	28.7254	38.145	36.5662	43.3564	4.71988	7.32529	4.18106	4.65965	5.1614	5.07598	5.22166	A	P	A	P	P	P	P	chr2	AC096559.2	GCTGATGGCTGCATTTGGGGAAGAGGAACAGAGAAGCCAGCTTGAGCAACATCTTCTGAG	399	ENST00000414086	Ensembl	+	12745271	12739112	noncoding
ASHG19A3A000353	14.3428	12.7945	18.5034	36.0646	33.1322	39.1713	41.4957	4.01939	4.0605	4.45914	5.00093	4.94532	5.17921	5.15605	A	A	P	P	P	P	P	chr10	GS1-756B1.2	CGCAGAAGATGCTGCCAATTGCGCGGAGGAAAAGTATTGCAAACCTGCTTCTCTTCTGTG	365	ENST00000454056	Ensembl	-	8302767	8301293	noncoding
ASHG19A3A042013	23.2361	16.3685	18.4032	32.3387	35.3668	22.0498	31.5316	4.70886	4.35816	4.45058	4.83703	5.04727	4.31224	4.73723	A	P	P	P	P	P	P	chr1	RP11-443B7.2	GACGTCCTGGAGAAACCTCTGGAAAAACAGAAATTTTATGACCCACAATTAAAATGATTT	423	ENST00000423963	Ensembl	+	235095736	235092977	noncoding
ASHG19A3A049717	5	9.50382	5	22.0941	19.2939	16.8935	28.4411	2.37766	3.71714	2.39437	4.25491	4.14164	3.89502	4.57603	A	A	A	P	P	P	P	chr13	RP11-114G1.2	ATTTCTAGATTACCAGCTCATCCAGGACTTGAGAGACCAAGACCCAGGAGAAAAGGAAAC	666	ENST00000425048	Ensembl	-	90152763	90129861	noncoding
ASHG19A3A049622	27.2562	27.39	22.4137	42.2409	39.003	40.9455	51.0895	4.93582	5.00889	4.72098	5.23681	5.19401	5.24279	5.46522	P	P	P	P	P	P	P	chr13	RP11-359P14.1	CAGCATAGTGAAACTTCAAGAACTAGGTTTTTCTGGACCATCCCAGTGCGCATGAATCAG	419	ENST00000423739	Ensembl	-	60789080	60788485	noncoding
ASHG19A3A016085	24.9084	12.2014	18.7685	34.422	24.5457	24.5491	28.2551	4.80886	4.00444	4.47882	4.93019	4.49634	4.47661	4.56426	A	P	P	P	P	P	P	chr2	AC108051.2	TAGTGAGCTCCTTGAAGCTACAACAATGCCATATGCATCCTGTCACAGTGTCTGGTAGAA	549	ENST00000435291	Ensembl	+	103605023	103603780	noncoding
ASHG19A3A040337	69.7918	85.0849	71.0717	164.36	136.341	165.228	153.6	6.25634	6.52646	6.31182	7.2788	7.06793	7.32705	7.12834	P	P	P	P	P	P	P	chrX	GS1-421I3.4	TGTGACAGCTTGATTTCTTCCACATCTCAGATTTCCACAGTGTACCCCGGTGTTTTCTCA	279	ENST00000422226	Ensembl	-	119253610	119251551	noncoding
ASHG19A3A038911	846.721	788.631	685.697	661.251	617.084	554.49	352.247	9.63067	9.5373	9.39908	9.40738	9.35685	9.16546	8.3809	P	P	P	P	P	P	P	chr9	RP11-316P17.2	GAGACAGAATTGGCCCCATTTTCTGCTAATTTCCATTCTCTGATTGTGCTGCCTGCTACA	822	ENST00000444374	Ensembl	+	92334585	92316565	noncoding
ASHG19A3A043443	5.12865	15.1169	12.1588	56.4278	49.4675	39.9998	49.0281	2.73422	4.25875	3.87798	5.67071	5.5484	5.20953	5.40344	A	A	A	P	P	P	P	chr10	RP11-442O18.3	TTTATGGCACCTTGGAAGAAACAAAAGCTTTACAGAGAAAAGGCTGGCTTGGCAGAGGGA	200	ENST00000443888	Ensembl	-	130696233	130695765	noncoding
ASHG19A3A040063	91.385	89.0013	90.5908	117.28	106.572	152.901	118.766	6.62968	6.59185	6.65006	6.76393	6.69699	7.2097	6.73739	P	P	P	P	P	P	P	chrX	RP1-172N19.1	AACGAAGTCCTGTCGGTCCCTACCGGCACATCACACACTCCTGGAAGCATGATCTTCACT	453	ENST00000445437	Ensembl	-	72002484	72001688	noncoding
ASHG19A3A020463	38.5208	32.8523	76.3644	77.8992	79.7645	86.053	87.7182	5.41509	5.25112	6.41308	6.16479	6.26399	6.34596	6.2753	P	P	P	P	P	P	P	chr22	RP4-742C19.12	ATTTGAACACTGTTGAGAAGACTGTGTACAAGAGAGATGTGCCATGTCAGCCTTGCAAGG	592	ENST00000424436	Ensembl	+	39488860	39487638	noncoding
ASHG19A3A037217	148.279	149.88	146.934	178.181	159.835	172.161	176.24	7.28798	7.3006	7.31506	7.40311	7.3112	7.38859	7.32978	P	P	P	P	P	P	P	chr9	NCRNA00032	ACTTCAGTTGTGGACATATCGGTTATGTTTCCTCATCAGCTTGGCTTGCCTCCCAAAAGA	2913	NR_026679	RefSeq_NR	-	27282791	27245683	noncoding
ASHG19A3A015479	43.1656	52.524	31.7906	68.1583	51.3013	50.4849	46.647	5.57575	5.87434	5.20466	5.95886	5.60127	5.55727	5.33057	P	P	P	P	P	P	P	chr2	AK123934	GAAAAGAAAACAGCTAAAGCAAAATCTAGAGCCCAGTTTTTGCCAAACCAGCCCCACGTG	679	uc002rnf.1	UCSC_knowngene	+	30573024	30569524	noncoding
ASHG19A3A032148	247.995	256.853	173.98	475.239	433.43	424.894	455.554	7.98523	8.02581	7.54145	8.9058	8.81475	8.75362	8.77582	P	P	P	P	P	P	P	chr6	RP11-439L18.1	ATGTCTAGTGACAGGCCAGAGATCAAAACCCAACACCCTCATTTACCTGACAGTGATTTG	554	ENST00000417650	Ensembl	+	143277783	143271347	noncoding
ASHG19A3A048508	85.8998	79.9182	85.6177	118.083	110.336	127.014	138.388	6.54689	6.44097	6.57947	6.77449	6.74983	6.93178	6.96836	P	P	P	P	P	P	P	chr1	RP11-86H7.7	ATTTTCATAAGGAAAGTTCTGTTAGGAGAGCTGCCTGAAACAACACCTCTGCCTGTGCTC	2272	ENST00000435559	Ensembl	-	95089740	95086706	noncoding
ASHG19A3A032624	5	13.6021	7.49786	25.5981	21.0927	20.8738	30.8338	2.37766	4.13236	3.2374	4.4829	4.2754	4.22693	4.69974	A	A	A	P	P	P	P	chr7	AC007036.6	TGTGCCCAAATCCCACGTGTTATGTCCTGTGTGGGTTGACACTGGGATGGCTGGTGACCT	674	ENST00000430537	Ensembl	-	30218630	30216002	noncoding
ASHG19A3A038967	173.15	155.128	121.22	180.129	161.322	125.494	129.473	7.50122	7.35113	7.05045	7.42012	7.32579	6.91363	6.86043	P	P	P	P	P	P	P	chr9	RP11-533K9.2	CACCCTGCCCGTTGTAGATGAGGAGTCCGTTGAAGATGAGGAGTCCATTGAAGATGAGGA	155	ENST00000417264	Ensembl	+	97250077	97247981	noncoding
ASHG19A3A050344	220.311	25.296	19.0341	39.2773	33.3506	39.5745	49.8316	7.82778	4.90178	4.50003	5.1291	4.95455	5.19401	5.4278	P	P	P	P	P	P	P	chr13	BC036310	CTGAAAAACACATGAAATCATCGTAACCCTGCTAAGTCTGTGCTTTGCAAAAATTAAAAC	981	uc001vlh.2	UCSC_knowngene	+	80492170	80446720	noncoding
ASHG19A3A031582	26.5141	33.1586	21.2334	50.4707	36.2461	33.8008	52.8508	4.90003	5.26295	4.64703	5.51189	5.08259	4.9543	5.52068	P	P	P	P	P	P	P	chr6	RP3-449H6.1	TTTATTGTGTGAGTTGAAGTGGAAGGTGATGAATGGCGGCTTCCCTTGGACAACAGATCT	473	ENST00000436113	Ensembl	+	44494491	44492995	noncoding
ASHG19A3A049902	159.044	135.007	103.66	285.372	209.5	189.129	248.018	7.38349	7.15908	6.8344	8.11996	7.71684	7.53153	7.85503	P	P	P	P	P	P	P	chr13	RP11-76K19.5	CTGTCATGTCGGGCCGTTTCCTTGCCTTCTTGCACACAGCACTATCTGAAATAATCTCCT	422	ENST00000438640	Ensembl	+	20162490	20161257	noncoding
ASHG19A3A031013	730.574	635.821	649.348	755.666	720.447	669.451	785.821	9.43077	9.24723	9.32493	9.61581	9.59224	9.44623	9.60886	P	P	P	P	P	P	P	chr6	RP11-146I2.2	ATCCTCCCCACTACAAGCCATTTTCTAATGTGTTTGATGTGTATCCTTCTATTTCGTTAA	177	ENST00000447179	Ensembl	+	14871959	14841454	noncoding
ASHG19A3A042641	105.117	102.739	94.8997	149.809	141.507	122.081	134.877	6.82431	6.78988	6.71533	7.13352	7.12604	6.87182	6.92567	P	P	P	P	P	P	P	chr1	RP11-84A19.2	TTATGAAGTTCGCATAACTGAGACATACCTACCGCACCTCTGTATCTGCCAACGCATACT	2257	ENST00000453837	Ensembl	-	32321169	32307619	noncoding
ASHG19A3A016227	152.036	132.343	146.943	270.512	296.975	306.109	326.417	7.3232	7.13399	7.31529	8.03663	8.24694	8.26385	8.26997	P	P	P	P	P	P	P	chr2	AC016745.3	CGGCAATGGATTAATAACAAGAAATTAATGGTGAAGTGGTGACGAAAATTCTACATTGCT	508	ENST00000422178	Ensembl	+	114182901	114182071	noncoding
ASHG19A3A038675	80.6361	90.7687	94.0234	46.2899	34.7366	49.9397	48.1656	6.46459	6.61944	6.70086	5.37528	5.01958	5.54011	5.37747	P	P	P	P	P	P	P	chr9	KGFLP1	ACCAATATTTAGTGGTAAATCCATTCCTGGTAGTATAAGTCACCTAAAAAAGACTTCCAG	3612	NR_003674	RefSeq_NR	+	46748385	46687565	noncoding
ASHG19A3A015242	18.7347	28.1008	15.2711	16.8054	30.104	26.4451	27.3017	4.39311	5.04194	4.19824	3.83121	4.80528	4.58672	4.50885	P	P	A	P	P	P	P	chr2	AC079779.6	TGGCCTCCAAAGACATCCTGAGAACCTGGGAATGTTGCATGGATGAAGGAATTTGCAAAA	852	ENST00000436808	Ensembl	+	342118	318052	noncoding
ASHG19A3A046113	64.4585	55.5511	53.3912	54.8659	53.5122	67.4682	59.7375	6.139	5.94854	5.91744	5.63164	5.66669	5.99199	5.70073	P	P	P	P	P	P	P	chr1	RP5-866L20.1	AGAAGACCACAAGTCAGATGACTCATATATTCACCTATTCAATAAACACTCCAGAGCATT	683	ENST00000433377	Ensembl	-	54982932	54982084	noncoding
ASHG19A3A037066	5	31.3269	11.4884	103.368	73.3688	54.8855	85.767	2.37766	5.18597	3.80773	6.58223	6.1396	5.68178	6.24371	P	A	A	P	P	P	P	chr1	RP11-476H20.1	GAATCACCTGTCTCTAACATTCTACTATCAAAACCTGAGATCAGAAGTTCCATGTAAAAA	440	ENST00000435554	Ensembl	+	194321556	194320072	noncoding
ASHG19A3A029309	37.0839	46.2126	42.2273	72.6166	78.5407	68.6218	80.6103	5.36323	5.70438	5.59678	6.05194	6.24214	6.01723	6.15508	P	P	P	P	P	P	P	chr6	RP5-1077H22.1	AGCTTCAGTGTGACCTGACCCTGAGCTTTCCAATCCAAAAATAGAAGTAATGTCTATGTC	403	ENST00000434292	Ensembl	-	962511	958562	noncoding
ASHG19A3A018563	5	5.024	5	22.8835	20.918	17.2424	20.2189	2.37766	2.32292	2.39437	4.30969	4.26308	3.92897	4.04134	A	A	A	P	P	P	P	chr20	LOC63930	TTCACTGAGGGGTTCGTCATCACCAAGCCTCAGCCAGAGATGTTAAACTGGAAAAACAAT	3366	NR_033370	RefSeq_NR	+	61716423	61640734	noncoding
ASHG19A3A032402	33.0818	32.6475	25.6057	72.4825	64.2976	52.5711	80.4153	5.20564	5.24293	4.90512	6.04951	5.94678	5.61885	6.15081	P	P	P	P	P	P	P	chr7	AC006028.9	GACCCCAGGACGCTTCTTGGAAATTGCTTTTTAAAATAAACCCCTGACATCAGCCTGTTT	3288	ENST00000412266	Ensembl	-	2762622	2757466	noncoding
ASHG19A3A008755	179.908	175.06	169.216	142.706	140.752	132.883	130.449	7.55318	7.51369	7.50303	7.06148	7.11826	6.99957	6.87292	P	P	P	P	P	P	P	chr17	AC005152.3	TTCAAAGGGGAGTCAGATGGTTTCGCAGACCGCTACATCATTTATTTTTTCATCACTCAG	381	ENST00000430908	Ensembl	-	70022138	70017991	noncoding
ASHG19A3A044385	3011.54	3037.82	2726.34	1389.1	1363.4	1214.9	1515.59	11.3975	11.4173	11.32	10.5347	10.5468	10.3477	10.6014	P	P	P	P	P	P	P	chr10	C10orf75	GTCAAACAGAAGGTAAACAGTCTTACGAATGTAATTCCTTAGGAAGACTTGTACAAACTT	2551	ENST00000454935	Ensembl	+	102143125	102133371	noncoding
ASHG19A3A000111	36953.5	27607.5	27243.2	17899.5	18379.5	18613.1	20753	14.9207	14.5477	14.5612	14.3149	14.3563	14.3529	14.4342	P	M	P	P	M	P	P	chr1	RP4-726F1.1	AAATTAGCTGGGTGTGGTGGTTCAGGCTCTGAAAATGATTGATTTTTTTCCTATATTTCA	342	ENST00000415629	Ensembl	+	79790534	79789453	noncoding
ASHG19A3A055154	176.658	276.623	157.987	683.628	727.525	679.459	777.872	7.52972	8.12767	7.40824	9.45699	9.60487	9.46999	9.59304	P	P	P	P	P	P	P	chr19	BC131616	CAAAACAAGACAGACTCCAAGACTGCCTCACACCCCCAGGATTACACAGTGGAGAATCTC	2014	uc002qgt.1	UCSC_knowngene	+	55224842	55219699	noncoding
ASHG19A3A013358	90.9116	108.222	72.9347	292.999	241.778	212.603	202.647	6.62173	6.85816	6.35113	8.15654	7.93929	7.70842	7.54592	P	P	P	P	P	P	P	chr2	AC009411.1	AGCATATCCTGATCGCCACCTCCAGACCCTTCTGATAGATTCATTACCTGAATCTATTTG	548	ENST00000412424	Ensembl	-	21872435	21861302	noncoding
ASHG19A3A044683	81.8094	83.5313	83.1117	119.62	127.468	130.697	136.51	6.48237	6.50112	6.53661	6.79516	6.97052	6.97269	6.94781	P	P	P	P	M	P	P	chr10	RP13-49I15.3	CTGGATCCACCGCCACCCGCTTGTATAAAAAGTGGGCCCCACACGGTGCAGCTTCGTAGT	258	ENST00000300167	Ensembl	+	135061389	135060391	noncoding
ASHG19A3A000198	174.708	164.651	150.942	93.5736	88.1471	89.3163	118.343	7.51456	7.42881	7.34995	6.43877	6.41122	6.40139	6.73058	P	P	P	P	P	P	P	chr1	RP11-354K1.1	GCTGGTCCTTGGGGTTTCTTGCAAGGCTGATAGCGGGGGAACCTCTCTCACAGGGCTGCT	357	ENST00000430123	Ensembl	+	211827518	211813149	noncoding
ASHG19A3A013449	15.5491	26.0572	21.5339	32.9591	26.9028	26.7703	43.448	4.12625	4.94093	4.66424	4.86289	4.63317	4.60564	5.22517	A	A	P	P	M	P	P	chr2	AC104695.4	CAAAAATCAAAATTTGAATCTTCTCCACCTATTGGAGAGCCCAGCGTTCATGGCACTTCC	849	ENST00000439700	Ensembl	-	28673051	28671033	noncoding
ASHG19A3A017138	42.2812	42.5103	32.0606	76.2942	71.8393	63.9138	80.0921	5.54616	5.59442	5.21522	6.13079	6.10858	5.91139	6.1455	P	P	P	P	P	P	P	chr2		TTTGTGCTCTGGATAAAAACCCACCACCTTGTTAATTTTTTACCTGGAACTCAGAACACC	396	EF212288	misc_RNA	+	234774741	234774345	noncoding
ASHG19A3A040418	3008.23	2939.3	2946.12	1372.73	1264.05	1340.27	1310.87	11.3965	11.3709	11.4306	10.5163	10.4266	10.4938	10.3976	P	P	P	P	P	P	P	chr1	RP11-452F19.3	TTAAGCTAGCCCATGACTACACAAGTGCAACTGTATTTCCCAGGTAGATGCCGGTAGATT	543	ENST00000450784	Ensembl	+	223010726	222988363	noncoding
ASHG19A3A016122	8.89682	5.18344	11.9602	28.4995	21.9715	18.4786	23.2633	3.35862	2.32935	3.85897	4.64758	4.33086	4.03755	4.26653	A	A	A	P	P	P	P	chr2	AC108868.6	TCCTGAGAAGAAGTAACTTCAATGCGGAAGGACCCGGGCTTCTCATGTTTCTCTTTGTAT	511	ENST00000451464	Ensembl	+	107160753	107159469	noncoding
ASHG19A3A042759	66.7985	132.864	79.9643	373.579	369.922	336.612	465.971	6.19241	7.139	6.48178	8.53136	8.56894	8.39684	8.80903	P	P	P	P	P	P	P	chr10	RP11-534L6.2	AGATGCTTTCTGCTCATGCACCTCAGTTTGGCCCAGTGAACACCTGCACCACCCAAGTGC	335	ENST00000440750	Ensembl	-	49880469	49872243	noncoding
ASHG19A3A038962	154.882	147.91	155.696	106.814	102.51	93.8192	244.614	7.34973	7.28249	7.38946	6.62947	6.63837	6.476	7.83498	P	P	P	P	P	P	P	chr9		AGCATAACGTTGCCACCTTCAGTTGGAAACGTATCCTTATCTAATAATTAAGCCCTGGAG	1448	BC064349	RNAdb	+	96940172	96938739	noncoding
ASHG19A3A037383	5	7.53622	10.4558	651.435	590.848	659.191	728.709	2.37766	3.47207	3.6799	9.38556	9.28961	9.42391	9.49632	A	A	A	P	P	P	P	chr9	RP11-395E19.7	AACAGGCAATTATTGCCTCAGTGTGTATTCTGATACATTTTCTCTCTAAATCTATTGTCC	847	ENST00000445963	Ensembl	-	40742447	40740775	noncoding
ASHG19A3A007437	1294.73	1279.11	1236.08	998.211	1019.14	1054.4	1090.33	10.2126	10.1951	10.2003	10.0357	10.1119	10.1388	10.1112	P	P	P	P	P	P	P	chr17	AMZ2P1	CGCAGTATTTATATACGGTCCATTGGATCTCTATGAAGCACCAGAATTATCAGTGAAGAA	3442	NR_026903	RefSeq_NR	-	62971703	62962667	noncoding
ASHG19A3A037402	76.8775	88.6049	61.156	276.939	243.953	214.621	308.566	6.39675	6.58469	6.10987	8.0743	7.95456	7.72074	8.18713	P	P	P	P	P	P	P	chr9	RP11-216M21.7	GTAGCTTCGAAGGCTTCTATCCCAACTCTACCTATTTCTATCTATCTTCTCTTGAGTTAT	3200	ENST00000450520	Ensembl	-	42367092	42363047	noncoding
ASHG19A3A030624	137.672	155.16	177.97	252.171	204.485	218.14	265.792	7.18987	7.35137	7.57557	7.93014	7.67954	7.74666	7.95816	P	P	P	P	P	P	P	chr6	RP5-899B16.2	CACATACACACACTAGAGAACAAGAAGGAATAGTAAACAGTTCCCTCCACTGCTAGAGGG	786	ENST00000445585	Ensembl	-	140198528	140177240	noncoding
ASHG19A3A017764	31.29	26.963	27.5311	52.2833	52.6182	54.7532	55.6476	5.12388	4.98866	5.00701	5.56474	5.63974	5.67879	5.59664	P	P	P	P	P	P	P	chr20	RP11-347D21.3	GACTTCCTAGAGCTACAGAGTAAGCCAAATTGGAGTTGCCTTTTCTGGACGTCTTGTTAA	429	ENST00000428999	Ensembl	-	46617488	46609231	noncoding
ASHG19A3A037720	42.5453	45.8435	48.1323	64.6838	49.7605	56.5162	70.1349	5.5563	5.6947	5.77863	5.87852	5.55814	5.72711	5.94196	P	P	P	P	P	P	P	chr9	RP11-165J3.5	TCCACAGAGTATGCCAGATCCTTTTTGGCATCTTTCCCCAAGTCTAAATTTCTTTAGTGT	641	ENST00000443716	Ensembl	-	96193581	96192623	noncoding
ASHG19A3A050015	13.1492	22.0337	13.4464	44.671	42.2673	32.5039	42.158	3.89549	4.72381	4.01601	5.32616	5.31395	4.89712	5.17953	A	A	A	P	P	P	P	chr13		ATTATTACCAACAAGGTCAACTGACAGTCTCCATATACTTGCCTCTAAATTTTGGAAGGT	2496	AK092065	RNAdb	+	30921304	30918808	noncoding
ASHG19A3A037238	60.589	52.0048	29.1923	79.1097	57.6163	52.6994	79.3654	6.04781	5.86192	5.08968	6.18789	5.78438	5.6235	6.131	P	P	P	P	P	P	P	chr9	RP11-555J4.3	TATCAGAATTCTCCAGCCACTCCTGGATACCATTGCCAACAAGCTGGAAAGAACTGTGTA	839	ENST00000413291	Ensembl	-	32645024	32643100	noncoding
ASHG19A3A039828	18.5495	9.02313	7.64882	23.8183	23.6573	31.191	29.1607	4.37773	3.65919	3.2607	4.37232	4.43942	4.83673	4.6155	A	A	A	P	P	P	P	chrX	RP11-344N17.8	GTGGCCCTTAGGCTTGGGATCTTAGTTCAAAATCATTGTACAAACTAAATTTATTCTACT	270	ENST00000422410	Ensembl	-	48193874	48193109	noncoding
ASHG19A3A011836	212.154	244.765	225.935	340.706	311.021	320.825	370.561	7.77544	7.9627	7.88592	8.39183	8.31147	8.33454	8.45761	P	P	P	P	P	P	P	chr1	RP4-704D23.1	TTGAAATCCCCTGCCTTAATCTCTCTTCGAAGACTTTTCTGCATTCATCTGAGTCCTCAT	579	ENST00000447908	Ensembl	-	14677518	14675449	noncoding
ASHG19A3A050495	66.3547	59.8947	62.9748	90.6819	81.739	78.4362	93.8461	6.18361	6.04829	6.14789	6.39533	6.30412	6.21141	6.37383	P	P	P	P	P	P	P	chr13	RP11-450H6.1	TAAAGCAAAACAGTTAAAACATCAGGCCACGCTCCTCAAACTGCAGGATTGCAAGCAGCT	545	ENST00000421423	Ensembl	+	112762329	112761432	noncoding
ASHG19A3A039093	17.1477	5	9.41155	20.8013	37.1666	27.6893	29.9855	4.26035	2.32192	3.53753	4.16133	5.12105	4.65721	4.65841	A	P	A	P	P	P	P	chr9	RP11-339N8.1	TAGAAGATCAGGTGGCAGAGAAGGGTCAGAGATGAATCCAGCCAGGCCTATAAAGATTAT	397	ENST00000415465	Ensembl	+	111465372	111463649	noncoding
ASHG19A3A014197	174.277	200.546	200.454	362.892	306.481	320.063	375.93	7.51112	7.69725	7.73456	8.4897	8.29309	8.33139	8.4806	P	P	P	P	P	P	P	chr2	AC114776.3	ATTTTTATTCTTCAGCTCTTTTGTTTTGGCTGGGGCTACCTGAGTCCTCCTTCCAGTTGT	4394	ENST00000414159	Ensembl	-	111474172	111467151	noncoding
ASHG19A3A041259	57.1624	54.1967	57.3901	106.038	105.649	105.755	107.736	5.97153	5.91249	6.01944	6.62032	6.68302	6.65441	6.58725	P	P	P	P	P	P	P	chrX	RP13-348B13.2	GAAATGTGCTACAACCACTCAAGGTCTGCAAACAGATTCCTATTTAGATGTTGTTGAGAG	308	ENST00000435867	Ensembl	+	88701982	88678736	noncoding
ASHG19A3A050450	24.8805	28.241	24.7055	59.3811	44.1803	55.0047	51.6255	4.80593	5.04828	4.85202	5.75124	5.37923	5.68644	5.48207	P	P	P	P	P	P	P	chr13	LOC121952	TACTGCATGTGAGTCTAGGATTGGGGTAACTTGTTCCTAGTTTGTCTCTATCAGCACCCA	2312	NR_026965	RefSeq_NR	+	103548383	103532448	noncoding
ASHG19A3A049706	226.533	216.621	240.002	237.813	223.894	227.327	263.228	7.8651	7.80014	7.96825	7.83988	7.81662	7.80883	7.94543	P	P	P	P	P	P	P	chr13	AF339814	AATTGACCTTGCCAAAAGATGCCTCCCTAAATCCACAAGAATCTCCTTGTTTGAACACAG	1670	uc001vlm.1	UCSC_knowngene	-	88323218	88096246	noncoding
ASHG19A3A037108	9.561	35.1231	15.7966	22.4226	20.1994	25.3846	25.0758	3.46028	5.33956	4.24411	4.27506	4.21069	4.52504	4.38622	P	A	A	P	P	P	P	chr9	RP11-29B9.1	GCTTCTGCAACATGGCAGTCGAGCCCCACATCAAAGAAGCAAAATATAGAATAACAGCAT	196	ENST00000413066	Ensembl	-	7935137	7930826	noncoding
ASHG19A3A049261	118.504	140.109	110.771	308.425	256.404	255.311	337.265	6.98918	7.21291	6.93006	8.23504	8.03738	7.9866	8.31689	P	P	P	P	P	P	P	chr13	RP11-523H24.3	TTGTTTTGCTAATCATCCTCCTTGAGCTCCACTGTTTTCATTCTGGGCATCCAATCCAGC	376	ENST00000423023	Ensembl	-	20250024	20248763	noncoding
ASHG19A3A042905	25.7894	13.9741	5	31.5582	16.5679	16.9579	21.856	4.86052	4.16381	2.39437	4.80341	3.90088	3.90088	4.17024	A	P	A	P	P	P	P	chr10	RP11-262I2.2	ACTTAAGACGCTGTCATTTTTCAGAAGAACCCAGCTTGCTTTGGAACTACAGTCAGCCCT	524	ENST00000427247	Ensembl	-	71767592	71754381	noncoding
ASHG19A3A017499	137.654	147.659	141.655	232.784	237.981	265.319	313.04	7.18948	7.28054	7.26478	7.80815	7.91164	8.04485	8.20855	P	P	P	P	P	P	P	chr20	RP4-738P15.1	ACAGAAAACTCCACAGGCCTGGGCTCGGCTCATCGCACAGCCTCCATCTCTGGATGCCCT	468	ENST00000438287	Ensembl	-	25129894	25123875	noncoding
ASHG19A3A037504	131.359	115.413	125.798	115.538	117.924	131.513	125.194	7.12353	6.94511	7.1	6.74068	6.85036	6.98262	6.81264	P	P	P	P	P	P	P	chr9	RP11-764K9.1	ATGTTCCAACACACCATCTAAGCATGAAGCAGGAGACACCCATAATTGAGTTTGCTGCCA	2818	ENST00000417843	Ensembl	-	68401759	68397877	noncoding
ASHG19A3A038922	209.039	209.52	125.058	354.002	344.652	281.274	364.512	7.75836	7.75648	7.09321	8.4542	8.46797	8.13541	8.43302	P	P	P	P	P	P	P	chr9	RP11-305L7.6	AATACACCCAGCCCACACCCTGACTTTACAACCTTTAATTAATTAGAGGAAAGAAAGAGA	454	ENST00000439438	Ensembl	+	93945044	93881343	noncoding
ASHG19A3A030419	10.8772	8.68947	8.21019	25.6212	20.6626	18.1027	25.4708	3.63484	3.61921	3.35207	4.48427	4.24487	4.00433	4.40726	A	A	A	P	P	P	P	chr6	RP3-399L15.1	ACCCAGAGATCGTTTGCTATGTGAATGCTTTTCTTGCTCAAATTTCAACAAACATGATTG	251	ENST00000438522	Ensembl	-	114809845	114798513	noncoding
ASHG19A3A029464	98.5236	167.855	106.147	83.691	100.19	99.7733	124.547	6.74	7.45274	6.86993	6.27418	6.60232	6.5673	6.8047	P	P	P	P	P	P	P	chr6	RP4-625H18.2	CTGTTTAAGAGAAGAATGTCTGAGTAGCTGTTGATTATCTCCCATAATCACAAAACAACT	1016	ENST00000447250	Ensembl	-	19804877	19803601	noncoding
ASHG19A3A046497	31.2725	28.2091	25.4518	58.4473	58.142	62.1139	71.997	5.12318	5.04697	4.89584	5.7256	5.79651	5.86473	5.97955	P	P	P	P	P	P	P	chr1	RP11-63G10.2	ACATGCACCCTTTCTAAGTAGCAAAACTGGGTTCAAATCCTCGGCTACATCACTTATGTG	395	ENST00000424592	Ensembl	-	59316926	59304119	noncoding
ASHG19A3A032616	1444.79	1610.99	1315.87	1507.47	1571.32	1444.26	1711.42	10.359	10.5131	10.2857	10.6552	10.7464	10.601	10.7745	P	P	P	P	P	P	P	chr7	AC007255.7	AGAAAATCAGCAGAGCTAGGCAATAAGTCAATCTAAAGTCTACATGCCCCTCCCTCTTCC	590	ENST00000442865	Ensembl	-	29724871	29638410	noncoding
ASHG19A3A018055	189.852	177.483	177.091	285.271	287.69	292.658	331.712	7.63276	7.53023	7.56915	8.11864	8.20304	8.19977	8.29524	P	M	P	P	P	P	P	chr20	RP1-278O22.1	GGCCTTAAGCTTGGTTTGTCTACATAGAAATCAAAATAACAATGTCAACCCATGAAAGAA	438	ENST00000417299	Ensembl	+	10734614	10733737	noncoding
ASHG19A3A018412	60.9025	63.3436	68.3637	22.8264	22.518	21.2131	15.723	6.05472	6.12638	6.25848	4.30483	4.36964	4.25178	3.64317	P	P	P	A	P	P	P	chr20	RP11-347D21.4	TAACATGCAAAGAAGCATCCAGGGATAATGTCTAAATACAGATGTGCTATTTCTCTCCTC	450	ENST00000425385	Ensembl	+	46613057	46612147	noncoding
ASHG19A3A042885	1497.04	1578.2	1574.86	2248.08	1794.06	2236.95	2403.78	10.4098	10.4866	10.5381	11.2364	10.9342	11.2387	11.2832	P	P	P	P	P	P	P	chr10	RP11-9E13.2	CATCTATTCTTTGAAACCCAGACACATTCTAGTATTGGGCACTAGAAACTGGTGATAAAT	1780	ENST00000439904	Ensembl	-	70240521	70237754	noncoding
ASHG19A3A019165	44.7944	54.4404	46.8383	77.9596	103.689	101.783	124.992	5.62766	5.91909	5.73915	6.16591	6.65658	6.59638	6.809	P	P	P	P	P	P	P	chr21	AP000282.3	GCCCCCAAAAGCCTGGATCAAATTAAGAGTTTTAATACTCAAAGTCATTTATATTGTGTC	576	ENST00000424837	Ensembl	+	34332874	34331195	noncoding
ASHG19A3A009355	48.0249	57.7461	36.4191	186.97	148.321	121.502	214.072	5.72615	6.00011	5.39456	7.47419	7.19689	6.86604	7.62693	P	P	P	P	P	P	P	chr1	RP11-31E23.1	GACTCCATTCTCATTGTGCTCTTACCTGTTTCACTTAGTTGGATTATTTCTGTTCAAAAA	930	ENST00000432296	Ensembl	-	198906539	198776786	noncoding
ASHG19A3A043347	10.7535	7.54201	10.1259	42.3895	35.1549	34.4033	34.8356	3.61978	3.47336	3.63393	5.24212	5.03757	4.98151	4.8885	A	A	A	P	P	P	P	chr10	CTA-109P11.1	GGGATAATTAATCAACACATCACCAACACCAAGGGATTGTTTTATATCAGAAGACGTATA	475	ENST00000450247	Ensembl	-	119331968	119321594	noncoding
ASHG19A3A043727	17.6588	8.27015	32.1538	25.2894	26.1268	29.407	21.4679	4.30582	3.56937	5.21921	4.46216	4.5881	4.74807	4.14088	A	A	P	P	P	P	P	chr10	C10orf50	TAATAGAGACTTCGGGGCTCATTTTATACCCGGTGAACCAGCCAACTTTCATGCAGTTGA	1117	NR_026793	RefSeq_NR	+	26883249	26878793	noncoding
ASHG19A3A000328	6.68693	10.9738	9.13166	19.5504	22.0472	17.7232	24.8044	3.00802	3.87855	3.49577	4.06782	4.33553	3.97037	4.3691	A	A	A	P	P	P	P	chr13	RP11-285E18.1	CGGGGTTTTCTCTCTTAGAGGGGAGGGCTCAGTAAACACTTAAGGAAGTTGCCGTGCACT	825	ENST00000451336	Ensembl	+	75130021	75126979	noncoding
ASHG19A3A037685	47.9026	47.2872	50.7135	115.295	127.232	122.198	126.415	5.72354	5.73706	5.84919	6.73788	6.96822	6.87305	6.8246	P	P	P	P	P	P	P	chr9	RP11-305L7.1	AAACTGAGCACCTAGAGAGCAACACCAAAAACCCATGGCCAATAATGGAGAGCCAAATCA	815	ENST00000423380	Ensembl	-	93869586	93867238	noncoding
ASHG19A3A055249	57.4702	58.741	41.3024	110.541	96.5749	83.3355	121.307	5.97824	6.02253	5.56657	6.67887	6.55136	6.29534	6.7697	P	P	P	P	P	P	P	chr9	BC128384	TTGATGGTTTGAAGAGCCCTAATCAGTGGTGGCTGTAGTCGGCTGGCTGAGGTCTCCCCA	1184	uc004arq.1	UCSC_knowngene	+	94921538	94919968	noncoding
ASHG19A3A048793	17.6445	18.8753	13.3829	27.5805	24.3882	19.3348	35.0211	4.30469	4.53411	4.00747	4.59917	4.48541	4.10794	4.89712	A	A	A	P	P	P	P	chr1	RP11-84O12.4	CCCCTGGTGCAGGATGGGTTCTTCATAAACCTTTATTAAATAAGTGTTCAATAAATCAAT	374	ENST00000416343	Ensembl	-	101094500	101092604	noncoding
ASHG19A3A030635	93.8811	94.6928	92.6551	90.7648	77.4387	75.9253	85.6414	6.67169	6.68078	6.67995	6.39716	6.22157	6.16135	6.24129	P	P	P	P	P	P	P	chr6	AK057490	TGTACTTCAGCAGGAGCAACCAGATGAATTGGCTTCTCTATATCCCCGTATTAGCCACAA	1900	uc003qje.1	UCSC_knowngene	-	143358719	143287560	noncoding
ASHG19A3A013733	11.2869	10.6228	9.43021	22.8007	35.6189	20.2247	27.9069	3.68194	3.83891	3.54017	4.30331	5.05774	4.17988	4.54504	A	A	A	P	P	P	P	chr2	AC012368.2	GAAGTTGAGTTGTGCCTTTAGGAATATTTTCCCACTACATCACTGTAATGAGTGTTACAA	3307	ENST00000431020	Ensembl	-	64432619	64412211	noncoding
ASHG19A3A044530	29.4555	27.7073	24.7117	26.6691	47.0494	31.8585	45.7099	5.04362	5.02487	4.85292	4.54645	5.47548	4.86865	5.2985	P	P	P	P	P	P	P	chr10	RP11-383C6.2	AAACCTCTGGAGCTGTGATATTACAAACGTGAAAAGATGACGAGCACTCAGCAACTTTCA	344	ENST00000433085	Ensembl	+	116756352	116754415	noncoding
ASHG19A3A018529	81.6303	75.6749	75.2074	124.949	112.67	126.088	131.648	6.4791	6.36809	6.39236	6.86575	6.78171	6.92092	6.887	P	P	P	P	P	P	P	chr1	RP1-50O24.6	CAGTTGCAAGAGCAAAGAAAAAACTTCCAAGCCCTCTTGATTTTTGCCACACTCTCATAG	306	ENST00000448791	Ensembl	+	27204736	27202623	noncoding
ASHG19A3A030714	16.548	24.135	12.9543	25.7134	21.0522	32.1079	27.161	4.21089	4.84385	3.96668	4.49074	4.27321	4.87925	4.50035	A	A	A	P	P	P	P	chr6	RP1-200K18.1	GAGGCACTTTTTCTGCATTTTTGTAATTGATTATGAGACTCGCTACTTGTATCTTCCTTT	442	ENST00000456715	Ensembl	-	153153048	153115630	noncoding
ASHG19A3A046549	21.1424	21.0066	25.7056	44.4098	30.2109	42.5316	45.2055	4.56628	4.66736	4.9119	5.31658	4.80991	5.30306	5.28344	A	P	P	P	P	P	P	chr1	RP11-740P5.3	ATCAGTGAAGGAGACATTTGTGACCCACTACTGGGGCAGGTGGTTTCACTTTCCCACCAT	429	ENST00000429389	Ensembl	-	2731563	2730996	noncoding
ASHG19A3A047091	19.7765	21.6037	20.3651	41.2117	27.0476	41.5354	51.7851	4.47234	4.70135	4.59354	5.20045	4.64136	5.26558	5.48696	A	P	P	P	P	P	P	chr1		CCAAACTCAAGTAATATCCCTTTCTTCTAGGCAAGAACTGCATTCTTTCTGAATAAAATG	1761	AK130929	misc_RNA	-	71247581	71246140	noncoding
ASHG19A3A017390	151.555	145.988	144.939	216.121	203.543	233.366	232.109	7.31853	7.26634	7.2942	7.68739	7.67239	7.85281	7.74925	P	P	P	P	P	P	P	chr20	RP5-1195D24.1	ATGACAACCATATTTGCAAGCCAGTCCCCACACTACCAATGTTCTTTCTACAAGAAGTAG	833	ENST00000422574	Ensembl	-	16844793	16838606	noncoding
ASHG19A3A017473	38.5531	39.4069	38.317	53.8137	43.5247	51.658	61.5129	5.41683	5.4912	5.46476	5.60475	5.35692	5.5913	5.74424	P	P	P	P	P	P	P	chr20	RP3-322G13.5	TGCAACAGACCACATTCAGAAGCTTGATTTCTTGTTGTTCTGGGAATATCTGGATCAGAG	514	ENST00000442440	Ensembl	-	23338642	23337230	noncoding
ASHG19A3A042879	9.42155	7.19232	5	22.0778	15.4258	14.4184	32.3533	3.43895	3.42372	2.39437	4.25315	3.78771	3.64255	4.77686	A	A	A	P	P	P	P	chr10	RP11-153K11.3	AATTGAAGCAAAAATAAGCAGGAGTGGGTGACTATTCTACACCCTGGAAAACTGCAACAG	465	ENST00000444086	Ensembl	-	70002136	69993007	noncoding
ASHG19A3A043501	153.836	155.315	155.025	183.622	187.122	153.373	176.966	7.33903	7.35278	7.38598	7.44968	7.54561	7.21584	7.33597	P	P	P	P	P	P	P	chr10	RP11-363N22.2	TATAGCAGCATACTCTACCTACCCCTGATCAGTTTATGGAAGAAAAGGAAACCAAACAAA	407	ENST00000435531	Ensembl	+	988683	978965	noncoding
ASHG19A3A033967	53.8047	45.7518	53.3933	127.406	116.728	107.023	134.964	5.88713	5.69025	5.91761	6.89265	6.83696	6.67282	6.92752	P	P	P	P	P	P	P	chr7	AC004535.2	TCACCTGCATGACATTTCTTCACTTGAGATGCTGTTTGCCCTTTAAATGGCATCTTAGCA	449	ENST00000422697	Ensembl	+	10747033	10742302	noncoding
ASHG19A3A016172	8.77896	5	5	45.2887	46.3434	43.1873	51.6944	3.33816	2.32192	2.39437	5.34562	5.45294	5.32241	5.48424	A	A	A	P	P	P	P	chr2	AC123886.2	CAGGTGGACATGAGAACTGTTGGTCTTTGGTACATATGTGTTGCAATGAGTAAGGATGAG	747	ENST00000458252	Ensembl	+	111369981	111368492	noncoding
ASHG19A3A041973	79.8707	91.5538	72.4822	95.2602	102.968	93.862	128.458	6.45247	6.63286	6.34074	6.46516	6.64378	6.47668	6.85025	P	P	P	P	P	P	P	chr1	NCRNA00184	ATCTCCCAAGGTTCTTTCTTTGTAACAGAACCCTAGTTTTTGGCTGGACTCATTTCCCCA	2270	ENST00000429269	Ensembl	+	234770526	234765056	noncoding
ASHG19A3A048071	70.7001	62.1639	71.3236	72.5316	76.3134	71.6472	88.8654	6.27803	6.10116	6.31707	6.05018	6.20075	6.08643	6.29426	P	P	P	P	P	P	P	chr1	AK022898	CAGCGAAGCTAGATTGTATAATTTATTAGTTTTCTCCACCTGGTAACACATCCTTAAGAA	2786	uc001dnu.1	UCSC_knowngene	-	91317175	91295103	noncoding
ASHG19A3A020272	8.22841	8.19084	11.577	142.215	132.162	138.751	153.895	3.2478	3.55726	3.81824	7.05763	7.02292	7.06105	7.13226	A	A	A	P	P	P	P	chr22	RP1-90L6.2	TCAGAATCAAGAGAGAGTGAGTTCTTGACATCACGGAGCGGTCTACATTCTAGTTCATGC	6043	ENST00000434868	Ensembl	+	27261749	27254596	noncoding
ASHG19A3A045893	22.9466	30.2708	18.9523	150.052	137.405	140.576	161.73	4.68983	5.13743	4.49281	7.1363	7.07924	7.08161	7.20123	P	P	P	P	P	P	P	chr1	RP11-117D22.2	TTTCGTGAAGAAGGTTGCATCTGACTGGGACAGTTAGGCCTCTGTGTACCACTTTAAAAG	850	ENST00000449958	Ensembl	-	53833917	53832339	noncoding
ASHG19A3A037286	36.1699	32.9802	27.9439	31.8396	37.8779	46.5848	52.439	5.33159	5.25683	5.02763	4.81636	5.1487	5.43909	5.50833	M	M	M	M	M	M	M	chr9	RP11-195F19.5	CCCCCAAAAACCCATACTGTGAGTCGCCTATATGAAGAGAACTAAATAATCCTGCCTGTT	835	ENST00000421828	Ensembl	-	34665976	34664779	noncoding
ASHG19A3A032498	5	9.92221	5	51.0748	24.9811	26.5382	45.709	2.37766	3.76437	2.39437	5.53128	4.51936	4.59324	5.29831	A	A	A	P	P	P	P	chr7	AC006041.1	ACAATTTGCTCTTCTGGTATTATATGGAAGTATTTGATCCTGTTGATGGCACTGCCTTTG	328	ENST00000425322	Ensembl	-	15881985	15880921	noncoding
ASHG19A3A038773	84.024	77.3301	68.5846	137.083	125.243	128.015	152.776	6.51711	6.39716	6.26342	6.99782	6.94257	6.9416	7.11997	P	P	P	P	P	P	P	chr9	RP11-63P12.6	TAAAATTCCCCCAGGCTGAGTGTTTCAGGAAACACCATAAATAAATAAAATTGTCTGTGT	672	ENST00000451596	Ensembl	+	74930380	74920344	noncoding
ASHG19A3A020924	38.7996	46.5499	41.6884	157.279	61.1977	58.8633	72.6254	5.42713	5.71509	5.57989	7.2097	5.87334	5.7842	5.99259	P	P	P	P	P	P	P	chr1	RP5-1066H13.4	TTTTTGCAAAGTGTAAAAAGCTACACCCTGGAATTTATTCTCCTGAATCTTTCTCTACAG	471	ENST00000414199	Ensembl	+	41342342	41329585	noncoding
ASHG19A3A027699	14.3718	15.0689	13.3999	28.4059	29.8064	30.1647	34.2938	4.02205	4.25511	4.00969	4.64141	4.79094	4.78835	4.86486	A	A	A	P	P	P	P	chr1	RP4-735C1.6	TTTTTTAGGCAACTTTCTGTGGCTTTTTCAAGAGTGGAGATTTGGCTGGAGCAGGATTAG	476	ENST00000453347	Ensembl	+	110414058	110370976	noncoding
ASHG19A3A013773	5	5.1372	5	261.848	253.823	259.834	262.217	2.37766	2.32751	2.39437	7.98878	8.02115	8.01334	7.93896	A	A	A	P	P	P	P	chr2	AK123766	GTGTCTATTTGTGTATATGCATGTGTACACATTTGTGTGAGTTCACAAATGATTACTCTG	2100	uc002sdy.1	UCSC_knowngene	-	67442451	67350488	noncoding
ASHG19A3A043823	106.456	136.461	109.755	199.938	164.368	183.141	214.381	6.84012	7.17589	6.91778	7.57207	7.35311	7.4814	7.62931	P	P	P	P	P	P	P	chr10	RP11-508N22.8	AGTTGTGTCTCTCAGTGCTTGTTGGGTTCACACCTATTAAATAAGCTGGCTGGTCTTCAC	790	ENST00000423162	Ensembl	+	38501285	38464595	noncoding
ASHG19A3A040049	1436.75	1510.25	1449.75	1088.83	1021.02	1034.74	1194.14	10.3509	10.4251	10.4178	10.1693	10.114	10.1068	10.2487	P	P	P	P	P	P	P	chrX	RP11-402P6.11	TTTTTCTCTTCCGCTGCATTTGCCCCCTTCCCAACGCAGTTCAAAGCAGTGTGAAATAAA	220	ENST00000439926	Ensembl	-	70981509	70980624	noncoding
ASHG19A3A008213	300.459	296.887	190.314	888.144	796.582	650.001	765.332	8.24585	8.21805	7.66479	9.86417	9.74056	9.40325	9.57105	P	P	P	P	P	P	P	chr1	RP5-1114G22.2	GCAGTGTCCCCTGTGTTCCTGACCTCCTGAGGAGCTGCTGGATGGCTTAGCCCCTTGACA	775	ENST00000412357	Ensembl	-	175173985	175172363	noncoding
ASHG19A3A032293	16.8924	20.7203	12.6516	31.5284	30.3435	21.0647	33.3359	4.24115	4.65132	3.93524	4.80212	4.81759	4.24076	4.81895	A	A	A	P	P	P	P	chr6	RP1-276N6.2	ACAAAATCAAGCTGATGAATTAAAGAAATATGGCCTGGTCAGGATGCCTGGAGGCCTCAG	467	ENST00000419196	Ensembl	+	160697162	160693648	noncoding
ASHG19A3A042720	169.958	172.771	168.748	468.041	445.825	420.448	438.832	7.47852	7.4944	7.49881	8.88421	8.86224	8.735	8.71546	P	P	P	P	P	P	P	chr10	RP11-38L15.2	GACGAGTGCTCTTATCCATCCACAGTTCTTATCACAGTTACTTATGCATATATTCATTTT	369	ENST00000437899	Ensembl	-	46951699	46937462	noncoding
ASHG19A3A019259	47.5801	26.5361	26.1655	29.5271	18.6976	25.2269	30.8727	5.71358	4.9678	4.93906	4.70069	4.09697	4.51569	4.70211	P	P	P	P	P	P	P	chr21	AP001043.1	AAGAATAAAAATAGGGGCTGATCTACTCAAACGATCCTGGGAGATTAAAAGATTTTGAAG	288	ENST00000434589	Ensembl	+	40275829	40260695	noncoding
ASHG19A3A055212	400.769	399.692	392.467	396.267	341.54	328.451	409.252	8.63779	8.63195	8.65354	8.6208	8.45468	8.36307	8.60859	P	P	P	P	P	P	P	chr6	MGC39372	GTGCTGGTGTCCGTGGCGTGCCTGGGTGGAAAATGAGCTTATATATGAAGAAGTCAGCGA	1251	uc003mud.2	UCSC_knowngene	-	2876744	2854891	noncoding
ASHG19A3A015792	53.1828	5.01169	5	34.3801	31.9425	42.6818	32.8992	5.87095	2.32241	2.39437	4.92814	4.8933	5.30846	4.80057	A	P	A	P	P	P	P	chr2	AC022201.4	TTTAGAGAAGAGGCATCCAGAATGGCAGAAAGATGCATGGCAATGTCCTCATTGTGTCAG	577	ENST00000452525	Ensembl	+	70649810	70630065	noncoding
ASHG19A3A032142	18.9917	13.5889	9.73819	33.8771	26.1012	34.627	37.9139	4.4149	4.13152	3.5852	4.90512	4.58576	4.99175	5.01776	A	P	A	P	P	P	P	chr6	GJE1	CCAGACAAAAGAGAAGTAAACCTCTTCTGTTACAATCAGTTCAGGCCAATCACTCCACAA	913	ENST00000450456	Ensembl	+	142456288	142454226	noncoding
ASHG19A3A018010	41.1321	31.1317	39.9093	41.4904	37.504	41.6495	52.0894	5.50398	5.17674	5.51867	5.20885	5.13537	5.27007	5.49743	P	P	P	P	P	P	P	chr20	BC069037	GATTCTCCGTGAGCTTTTCTGAATTAAAACAAACAACATAAAATCATGGGAGTGCCTTTA	681	uc002wkq.2	UCSC_knowngene	+	4176599	4173736	noncoding
ASHG19A3A050492	43.4066	49.9345	37.1768	92.9836	97.3482	81.5901	100.687	5.58535	5.80568	5.42205	6.4299	6.55908	6.26648	6.47782	P	P	P	P	P	P	P	chr13	RP11-75F3.1	CTGTGTCTACTGGGATCTCCTGTTTTTATTGTTTTGGGATGAGATTTTAAAAACACCATT	376	ENST00000440860	Ensembl	+	112555490	112554298	noncoding
ASHG19A3A012561	45.6889	47.9169	54.2039	86.6688	87.173	82.4942	107.838	5.65801	5.7539	5.93919	6.32674	6.39433	6.28076	6.58898	P	P	P	P	P	P	P	chr19	AC002115.5	ATTGTAAACTGCTTCCCAGCTCTTGAACAAACCACCAAATATACACCACAGTGCAATTTA	362	ENST00000453968	Ensembl	+	36092403	36088808	noncoding
ASHG19A3A000205	1152.13	1245.21	1186.7	1821.16	1694.56	1767.46	2046.08	10.0473	10.1621	10.1484	10.9222	10.8546	10.886	11.0408	P	P	P	P	P	P	P	chr10	RP11-182L21.2	AACAGCCCCCTTCTCAGTTTTCCTGCTGCTCCTATCAGTGACAAATCAGTGTATTAGAAC	886	ENST00000431300	Ensembl	+	81598237	81586458	noncoding
ASHG19A3A037463	240.928	245.036	234.077	44.3329	44.5299	42.4183	47.8489	7.94739	7.96418	7.933	5.31376	5.39256	5.29905	5.36986	P	P	P	P	P	P	P	chr9	RP11-111F5.3	ATAAACTATTCTTATTCTTGTGTCTTGTCTATAGGAAGGGAGTGTATCCTGGTGTAAGAC	495	ENST00000448491	Ensembl	-	46662837	46661443	noncoding
ASHG19A3A044825	15.4314	12.6909	9.48958	21.4903	17.2157	21.4256	24.1255	4.1166	4.05063	3.54883	4.20981	3.95965	4.26653	4.32293	A	A	A	P	P	P	P	chr11	AC113331.9	ATTCACAAAATTGCCTTTGGCTCACAGGAGTTGTAGCAAAATTATGTCTTCATAGCTACA	869	ENST00000428160	Ensembl	-	5128760	5127291	noncoding
ASHG19A3A000153	67.568	84.5294	70.5522	130.847	123.186	127.172	144.872	6.21089	6.51696	6.30129	6.92968	6.91582	6.93346	7.03892	P	P	P	P	P	P	P	chr21	AP000688.29	GTGACAAGACCTACTGCTGGACAGAGTGCTGCCTTTGGACTTTCCAGTGCCTCAGCATCA	2336	ENST00000422473	Ensembl	+	37481988	37477178	noncoding
ASHG19A3A017320	222.728	226.451	224.044	242.044	236.21	210.268	281.115	7.84278	7.85858	7.87617	7.87035	7.8997	7.69053	8.04701	P	P	P	P	P	P	P	chr20	BC048109	TTAACATTCAGAAGCCTTCATCTCCCATCTGCAAAATGGGCATGTCCAACTCAGAAGCTG	1564	uc010gbl.1	UCSC_knowngene	-	5426394	5412655	noncoding
ASHG19A3A018884	27.5379	21.3702	31.4352	67.4718	47.123	52.9299	67.2304	4.94841	4.68855	5.18849	5.94008	5.47737	5.63064	5.87929	A	P	P	P	P	P	P	chr21	AF064858.10	TTGTTGAATCCAGCCATTCTGCAAGTGCCTGTTTTGACTTTAGGGATGGAAGTCCTTCCA	292	ENST00000440714	Ensembl	-	40401053	40400460	noncoding
ASHG19A3A040891	63.4541	90.8419	70.6774	126.567	88.5629	108.376	118.037	6.11482	6.62132	6.30412	6.88464	6.41768	6.69039	6.72661	P	P	P	P	P	P	P	chrX	AK127697	CATTTTAGCTTGCTTGTTGCTGGGGAAAAGACTTGCTGCTTTGTGTTTCATTTGATGAAG	2924	uc004dgj.1	UCSC_knowngene	+	45386484	45364632	noncoding
ASHG19A3A050134	206.016	138.898	131.501	210.926	192.194	204.054	190.971	7.73874	7.20009	7.16336	7.65296	7.58567	7.64399	7.45342	P	P	P	P	P	P	P	chr13	RP11-290D2.4	GAAAGTAACTTGAGGCAACTGCAGGAGGGCTGCATGGCGGGAAAGAAATTGCTGAAAACA	225	ENST00000412946	Ensembl	+	45919045	45918513	noncoding
ASHG19A3A049904	15.2466	138.536	10.9443	23.4833	25.0746	20.1619	21.5447	4.10013	7.19689	3.74414	4.34942	4.52642	4.17456	4.14706	P	A	A	P	P	P	P	chr13	RP11-523H24.4	AGGACCCATGGGGTCCCTATAATCAAATCTTTGGAGTTTTTGTTTTTGTTTTGAGAGAGG	263	ENST00000426340	Ensembl	+	20253837	20252829	noncoding
ASHG19A3A043764	17.3033	17.977	20.6276	40.5499	38.9757	41.1347	46.83	4.27308	4.47504	4.60938	5.17458	5.1932	5.24947	5.33707	A	P	P	P	P	P	P	chr10	RP11-14C22.3	TGTTCAGAAGCCCAGGGTTTTCCAGCTATTTGGGAGCTTTCAAATTCTCTGAGAAACAAG	486	ENST00000450581	Ensembl	+	30946464	30944417	noncoding
ASHG19A3A031462	37.8832	36.3511	43.8327	73.6076	78.7125	81.8651	83.4754	5.39218	5.38432	5.64903	6.07659	6.24598	6.27086	6.20316	P	P	P	P	P	P	P	chr6	RP1-153P14.4	TGGATTCTTATCTGGAAGACACCCTGCGTCTTAGAACCTGCACCACAAGTTTTTGTTGTT	514	ENST00000434901	Ensembl	+	37515490	37514327	noncoding
ASHG19A3A030992	122.868	119.716	141.728	268.006	242.487	225.542	253.418	7.03751	6.99442	7.26634	8.02332	7.94409	7.79641	7.89107	P	P	P	P	P	P	P	chr6	RP3-413H6.2	ATGCAAATATTTGTCCTGTTCTGAGACATCCTCCTGGGTCCCAGCTTCTTCTCTTGAAGA	554	ENST00000412132	Ensembl	+	11811481	11810834	noncoding
ASHG19A3A031136	387.346	366.159	386.755	270.633	241.91	273.447	250.064	8.59309	8.51342	8.63597	8.03738	7.94015	8.09691	7.86898	P	P	P	P	P	P	P	chr6	RP11-373D17.1	TTACCAACAAAATCCGTTGCGCCGCAGTGAGTTAGCTACCTTCTATCTCCACTTTGTTCT	507	ENST00000424968	Ensembl	+	26991703	26988231	noncoding
ASHG19A3A055324	58.2807	44.1421	53.849	11.3744	5	15.8961	17.0553	5.99894	5.64057	5.92944	3.21127	2.33128	3.79737	3.77573	P	P	P	P	A	P	A	chr6	FLJ22536	TGTGTACCTTGTTTGCAACAGTATGGTTCTCGATCTACACATAGGCTGGAATGCAGTGGT	1806	uc011djk.1	UCSC_knowngene	+	22194614	21668877	noncoding
ASHG19A3A014134	674.337	752.466	843.295	685.171	635.025	646.612	694.833	9.32878	9.478	9.68675	9.46096	9.40249	9.39362	9.42895	P	P	P	P	P	P	P	chr2	AC018730.1	AGCGGAGCCGTGCGATGTATTTGAAAAGCAATCAGTCCGACCTTCCCCCATAGATTCATC	607	ENST00000447876	Ensembl	-	105469641	105424030	noncoding
ASHG19A3A047087	1417.41	1401.84	1472.22	2150.67	2031.56	2154.96	2347.71	10.3312	10.3198	10.4399	11.1762	11.1198	11.1796	11.2454	P	P	P	P	P	P	P	chr1	RP11-99H8.1	GGCTCTTCCTCCTGCTCCTGTCACCACAACAACTAGTGTGTGGAGCACAACTAGCCTGAC	432	ENST00000423187	Ensembl	-	71185972	71181615	noncoding
ASHG19A3A013029	575.744	556.906	558.594	248.003	267.404	338.375	335.172	9.11006	9.06355	9.11381	7.90413	8.097	8.40326	8.30802	P	P	P	P	P	P	P	chr1	LOC339535	CTTCTTCATATTTAGTACTTTTACAATTTTAACAGTAAAATTAGTTTCATGTTTTATAGC	1540	NR_015407	RefSeq_NR	-	238649317	238643685	noncoding
ASHG19A3A050367	25.4963	22.7262	9.44017	50.9997	34.5758	43.8871	53.5075	4.84322	4.76408	3.54197	5.529	5.01264	5.34848	5.53912	A	P	A	P	P	P	P	chr13	RP11-471M2.2	ATTCACCTTTCAAAGGCACAGACACTCCTCTTATTTTGTACACATTGCAACACTTTGAAC	344	ENST00000422074	Ensembl	+	88456063	88453290	noncoding
ASHG19A3A039055	13.1779	12.9665	5	34.012	26.4846	30.1812	32.1136	3.89744	4.07716	2.39437	4.91239	4.61012	4.78925	4.76543	A	A	A	P	P	P	P	chr9	RP11-436F21.3	CCAGCTGAGCATAATGCAAATCAGTTGTCCCTCAGCTAACTCATGCACATAAACGAATTC	202	ENST00000425157	Ensembl	+	106015452	106006007	noncoding
ASHG19A3A032275	19.7987	25.8201	20.5925	18.7146	22.0208	36.4768	34.036	4.47377	4.92825	4.60742	3.99986	4.33348	5.07228	4.85117	P	P	P	P	P	P	P	chr6	RP11-13P5.1	TTAACTTTTCTCTAACTTGCTTCATGAAAGTTAATTCTGCTGGGACCCCACGAGGCAGCG	845	ENST00000421161	Ensembl	+	159537085	159528822	noncoding
ASHG19A3A013251	98.7603	107.662	102.615	73.3707	63.7618	62.2505	56.5412	6.74392	6.85138	6.82172	6.07026	5.93602	5.86964	5.62173	P	P	P	P	P	P	P	chr1	RP11-261C10.3	ACTTGACCACTGTGAAGACTGGTGTGGGAAGGGTCGTTTCGGATGCACTTGAGCAGGGGT	1715	ENST00000418377	Ensembl	-	243221165	243219130	noncoding
ASHG19A3A011325	55.1215	70.7822	51.0542	105.615	106.198	97.4106	111.025	5.92114	6.27835	5.85847	6.61367	6.69133	6.53143	6.6311	P	P	P	P	P	P	P	chr1	RP11-410C4.4	TATTCGAGTCTGCTGCCTCAGATATATGGGCTATCATTATCCTAAGTGCCTGCACACCTA	390	ENST00000446169	Ensembl	-	220660385	220658445	noncoding
ASHG19A3A017304	14.0163	10.0873	23.3635	47.9219	46.43	36.4386	47.8313	3.98814	3.78322	4.77607	5.42681	5.456	5.07081	5.36952	A	A	P	P	P	P	P	chr20	RP11-307O10.1	ATTCTGCAAGAAGACATCTACACAAAAGATACACACTCAACAGAAAGGGTGCCGTGGTGG	408	ENST00000448825	Ensembl	-	4412320	4411807	noncoding
ASHG19A3A018056	35.4812	33.8435	28.2046	122.198	117.79	115.373	133.606	5.30679	5.28783	5.04118	6.83326	6.84952	6.78237	6.91215	P	P	P	P	P	P	P	chr20	RP4-697P8.2	CCCCAGTAGAGAAAGCACTGGAGAACAACATTCATTCTTCCTTAATAAATCTTAGTTTTA	268	ENST00000421788	Ensembl	+	10847830	10845302	noncoding
ASHG19A3A049627	9.19723	6.80164	6.65793	34.5191	31.5558	30.4643	34.7619	3.40694	3.36497	3.09955	4.93483	4.87507	4.80196	4.88621	A	A	A	P	P	P	P	chr13	RP11-234O23.1	AGATGTCCAAATTTCTACCAAAGCAATGCTGTTCTGTCCGCAGTAGGCAGTTTGTGTGGA	433	ENST00000448411	Ensembl	-	63306313	63246417	noncoding
ASHG19A3A030598	54.4186	59.9931	57.1232	309.865	295.377	313.559	346.434	5.90486	6.05052	6.01308	8.24305	8.23791	8.29869	8.35772	P	P	P	P	P	P	P	chr6	RP11-356I2.2	ATATCAAAATTTGCCATGGTGCCCAGCATGGTTCAAGATCATAAGTGTCAAGCACATCAG	1025	ENST00000440578	Ensembl	-	138147031	138144809	noncoding
ASHG19A3A000066	75.1035	97.653	83.8791	795.181	734.849	758.823	798.448	6.3622	6.72179	6.55043	9.69383	9.62182	9.63866	9.63435	P	P	P	P	P	P	P	chr9	RP11-101E5.1	ATTGAACAAGGCAATTCCCAATCTCTTGAGCCCTGGCTGTGTTCACTGAATGGATCTAGT	419	ENST00000366195	Ensembl	+	65469026	65467782	noncoding
ASHG19A3A018324	41.7843	36.3038	34.84	63.0676	70.9092	57.9001	81.2327	5.52835	5.38285	5.32789	5.8418	6.08922	5.75902	6.16607	P	P	P	P	P	P	P	chr20	RP5-1121H13.4	AGTTCCTAGCTTGTCCTTCTGGTGAGAATTGAGCACACTATACTGTGGACATAAAGACAA	594	ENST00000431589	Ensembl	+	40692609	40619779	noncoding
ASHG19A3A007469	27.7586	28.2153	29.2976	52.7443	46.4987	82.1126	53.3858	4.95911	5.04742	5.09499	5.57641	5.4579	6.27476	5.5361	P	P	P	P	P	P	P	chr20	LOC284788	AAGCAAGTCTTCCTGAAGCAAGCAGAGTCCTTTCAGCCACAAGTCTTAATAGTTTGTGTG	1681	NR_027089	RefSeq_NR	-	22401281	22380988	noncoding
ASHG19A3A020593	142.745	148.818	147.081	287.349	253.088	263.222	292.498	7.23843	7.2898	7.31663	8.13011	8.01673	8.03145	8.10751	P	P	P	P	P	P	P	chr22	RP13-455A7.1	GAATCTGCCACCACAACTTCCAGCCTCCAGGGGACGGACACCCACTTTCAAGGATTTCTT	219	ENST00000449941	Ensembl	+	48257811	48256419	noncoding
ASHG19A3A055163	5	6.42255	5	25.5112	19.7307	22.4828	23.2972	2.37766	3.30119	2.39437	4.47732	4.17171	4.34314	4.27041	A	A	A	P	P	P	P	chr2	CR617033	AACTAGTCATCAGTTTATTCATGCAAGTTTCTGGGATTGGATTCATGAACTCATCCTTTG	1343	uc002rpc.1	UCSC_knowngene	+	34947861	34902646	noncoding
ASHG19A3A031805	204.28	255.188	113.579	45.0098	45.3616	49.0086	53.8611	7.7287	8.01693	6.96023	5.33639	5.42184	5.51399	5.5478	P	P	P	P	P	P	P	chr6	RP1-102H19.6	TTTTTGGACTTTAAGACCATAAAGGACTTCCTCTGCTGAGGACCCAAACTGAACCCCAAG	542	ENST00000448282	Ensembl	+	88102519	88081310	noncoding
ASHG19A3A019965	5	5.13877	5	28.6191	33.9121	28.7828	22.5171	2.37766	2.32757	2.39437	4.65483	4.98125	4.71602	4.2136	A	A	A	P	P	P	P	chr22		ATAGCCTAGAGATGGTTATGTAGCGGGGGACTGAGCTACTAAGTGAAGGCATAGATAGTT	1555	AK058075	misc_RNA	-	50231434	50226263	noncoding
ASHG19A3A044177	2528.95	2439.72	2528.61	3422.06	3077.03	3269.15	3428.86	11.1573	11.1126	11.2152	11.8474	11.73	11.7892	11.801	P	P	P	P	P	P	P	chr10	LOC642361	AAGGCGAGCCATGTTCTAGAGCAATGTCTTTCTTGTATTAAAATACAGCCCCATGCTCAC	1712	NR_029407	RefSeq_NR	+	81587355	81585657	noncoding
ASHG19A3A023118	23.7338	11.8853	15.2018	33.3695	27.364	24.5335	36.0184	4.73746	3.97581	4.19127	4.88159	4.66112	4.47502	4.94319	A	P	A	P	P	P	P	chr1	RP4-749H3.1	GTGTGGGTTCCAAGACAAGATGGTGGCTGGTAATGATTTTCAAATAAATATATTTTGTGA	2993	ENST00000426428	Ensembl	-	20755275	20687071	noncoding
ASHG19A3A016206	103.515	123.803	108.064	152.175	126.619	148.587	153.107	6.80574	7.04279	6.89539	7.15691	6.95955	7.16628	7.12323	P	P	P	P	P	P	P	chr2	AC012442.6	TCTATGCCATGCAACTAAAAGAAGTGTGATTAAAACAGACAAAATGGAGATCCAGACTAC	529	ENST00000436885	Ensembl	+	113349516	113348372	noncoding
ASHG19A3A050326	13.3607	11.6847	5	55.0728	48.9663	40.0202	58.5764	3.91721	3.95452	2.39437	5.63641	5.53244	5.20994	5.6726	A	A	A	P	P	P	P	chr13	RP11-318G21.3	ATTTGGTGCCAGTGTTCTTCATACGAAGTTAGTGATGCGCTGCCAGTATTGCAACAGCAT	601	ENST00000422405	Ensembl	+	78408085	78402356	noncoding
ASHG19A3A016787	2007.31	1770.6	1714.69	7049.94	6601.6	6845.41	7449.48	10.8286	10.6481	10.6626	12.9206	12.8467	12.8726	12.9271	P	P	P	P	P	P	P	chr1	RP4-798A10.4	GCTCCCATTGTTTGCTTGTTCAATTGTCTGTCCGTTAAATAAATAAAACCCTTTTCCTAT	342	ENST00000452795	Ensembl	+	16848303	16847188	noncoding
ASHG19A3A049686	40.6468	46.3873	44.0964	72.8817	74.6129	71.027	77.7871	5.48793	5.70932	5.65946	6.05763	6.1668	6.07263	6.0986	P	P	P	P	P	P	P	chr13	RP11-203P2.2	AAAGCCTATGTACAGTTAAAAGAGCACAACTGTCCCTGATCACATGGAAGCCTTCTCCAG	342	ENST00000435156	Ensembl	-	78851649	78849854	noncoding
ASHG19A3A038602	44.3513	46.4077	51.1005	125.6	107.736	113.204	123.684	5.61466	5.71062	5.85935	6.87398	6.71312	6.75225	6.79616	P	P	P	P	P	P	P	chr9	BC121813	CTGTCGTTACTGCTGCACTTGGCTGTTTTTCTTTGGATAATTATTGCAATCAATTTTAGT	1106	uc004abv.1	UCSC_knowngene	+	41522322	41516045	noncoding
ASHG19A3A037968	5	5.24481	5	401.866	411.083	394.839	436.548	2.37766	2.33178	2.39437	8.64143	8.7299	8.6382	8.70757	A	A	A	P	P	P	P	chr9	RP11-281A20.1	CTTGGAAATCAACACCTGTGAAAGCAAGAGGGTATAAGCAGAATTGTGCAGAGGAAGAAG	625	ENST00000449730	Ensembl	-	120659534	120602599	noncoding
ASHG19A3A029807	20210.2	18968.3	18720.8	31866.9	29741.3	29666.5	32328.7	14.0611	14.0087	14.0315	15.1757	15.0427	15.0232	15.0715	P	P	P	P	P	P	P	chr6	CR624291	TTTGAGCTGTGTGGGAGGGAAGGGCATTGAAATTGTAGGTTGTAATCTTGTGCCAACCAA	2513	uc003ojj.2	UCSC_knowngene	-	34249969	34247456	noncoding
ASHG19A3A010948	25.6126	22.9752	24.6235	5	13.1699	14.0798	18.249	4.85037	4.77861	4.84852	2.32974	3.52592	3.59738	3.88345	A	P	P	P	A	P	A	chr1	AK092251	AGCAGAGGAGTATACAGGACAAGAACTTGATGGTCTCGGGAAAATGGACAACATGACTCA	3300	uc001hkf.1	UCSC_knowngene	-	214139607	213992977	noncoding
ASHG19A3A035383	36.0599	40.8933	35.7588	75.2035	76.7125	62.1482	79.1868	5.32775	5.53956	5.3667	6.10831	6.20849	5.86597	6.12691	P	P	P	P	P	M	P	chr7	AC099552.3	ATGCCCAAGACTTCTAGGCCTCAGCAGTGCTCCCAAGGGTGTGGCACCAGGTGAAGCAGG	367	ENST00000454149	Ensembl	+	154996899	154995856	noncoding
ASHG19A3A000221	111.331	200.109	111.488	161.099	144.016	154.039	341.561	6.90089	7.69323	6.93824	7.24669	7.15136	7.2217	8.33454	P	P	P	P	P	P	P	chrX	AC004383.5	GGTGTCCTTTGAGCTGCCGGGACGGCGCAAGAAACCTGTTTATGCACCCTCCTGCAATCC	724	ENST00000434384	Ensembl	+	133693953	133684002	noncoding
ASHG19A3A029856	24.1652	17.9413	18.0222	43.5088	24.0828	28.1161	18.6812	4.76537	4.47288	4.42074	5.28232	4.46698	4.67985	3.91788	A	P	P	P	P	P	P	chr6	RP1-295F6.2	TGCCTGCATTTTTATTACAACATAGTCCTAACACTGCATTTCACTGTCAGGCACCTCCGT	439	ENST00000448738	Ensembl	-	38131580	38130576	noncoding
ASHG19A3A037378	9.8018	9.34569	11.4175	43.4602	47.9689	40.0577	38.2074	3.4971	3.69778	3.79883	5.28044	5.50457	5.21213	5.02823	A	A	A	P	P	P	P	chr9	RP11-95H8.5	GCTGAAAGAGTGAGCCAGGACAGCCTTTCGACATTGAACAAGGCAATTCCCAATCTCTTG	1125	ENST00000433614	Ensembl	-	39926970	39925025	noncoding
ASHG19A3A040446	57.9006	52.9034	45.9004	10.258	16.2398	15.5434	14.7915	5.98998	5.88346	5.71322	3.06381	3.86824	3.75819	3.53648	P	P	P	A	P	P	A	chr1	RP11-239E10.3	ATAATCATGAGGAAAGTGCAATTGTGGGATCATACAAGCTGAGGATGCCTAGAGGGATCC	487	ENST00000446145	Ensembl	+	223361496	223354485	noncoding
ASHG19A3A020732	75.8862	91.6046	70.5923	158.032	179.216	178.896	171.319	6.37804	6.63372	6.30223	7.21624	7.48186	7.44675	7.28602	P	P	P	P	P	P	P	chr1	AK125248	TCCTCCAGGAAGCAGCAGGTTAACTGATTGGCAGAGACAGAGGGACTGAGGGACTGTCTC	2373	uc010nxt.1	UCSC_knowngene	-	237877	89294	noncoding
ASHG19A3A053607	834.521	790.682	768.639	400.418	375.859	353.205	437.612	9.60487	9.54115	9.55887	8.63579	8.59309	8.46943	8.7099	P	P	P	P	P	P	P	chr16	AC002331.1	GGAGCACTTCCTTCTGCTGATGAACATGTGCTATGAAAAATAAACTTATTTTGTTTAGCA	294	ENST00000443373	Ensembl	-	26606134	26596075	noncoding
ASHG19A3A000107	95.7713	103.077	86.8659	237.878	241.746	207.908	287.131	6.6981	6.79349	6.5979	7.84	7.93896	7.67455	8.08026	P	P	P	P	P	P	P	chr20	RP5-828H9.3	TCCTCCTGGCTCTTCAGCTTAGCGGGATGTCACCTTCAGCGTCTGAAAGCTGGGTTTGAT	442	ENST00000414677	Ensembl	-	5413249	5412637	noncoding
ASHG19A3A034024	54.0082	52.2964	45.8783	68.7289	87.2327	90.5964	103.261	5.89263	5.86816	5.71226	5.97181	6.39585	6.42225	6.51957	P	P	P	P	P	P	P	chr7	AC099342.1	TTCCCTGAAATTGCTTTGAGCCTCTGCCAAACAGCCACTGAAGGACTCCGAAAAATACAA	1124	ENST00000446399	Ensembl	+	20351335	20336330	noncoding
ASHG19A3A042573	91.387	116.171	103.19	201.496	184.647	156.981	199.841	6.62977	6.95357	6.82955	7.58349	7.5252	7.25385	7.52412	P	P	P	P	P	P	P	chr10	RP11-305E6.1	CACCAGGAATACACCATTTAAACTCTTTTCTGCAGCCTCCTCAGTTTTATGTAAAAATAA	514	ENST00000411802	Ensembl	-	30569839	30569014	noncoding
ASHG19A3A044056	17.027	22.4517	17.8016	33.9782	32.5696	38.0685	40.0971	4.25067	4.74786	4.40237	4.91108	4.92335	5.1353	5.10198	A	P	P	P	P	P	P	chr10	RP11-343J3.2	AACTTGGAGCTTTTTTGGTCTGGGAAAGAAAATCCAAACCATGCTTCTCTAGGGCCTCCT	503	ENST00000428753	Ensembl	+	71336910	71335562	noncoding
ASHG19A3A033809	21.9561	23.0299	26.0728	40.3912	38.3593	37.615	53.9672	4.62089	4.7819	4.93345	5.1687	5.1687	5.11776	5.54994	A	P	P	P	P	P	P	chr7	AX746648	ATGAATATTTATTAGTGTGAAGACACCCCCAGGTCCTGGAACACTCAACACATGTAGAGC	2698	uc003wml.1	UCSC_knowngene	-	156238282	156230482	noncoding
ASHG19A3A042723	222.314	277.929	185.871	316.104	295.391	243.401	315.42	7.84023	8.13481	7.63362	8.27422	8.23801	7.91615	8.22083	P	P	P	P	P	P	P	chr10	RP11-314P12.2	CCCCATATTCTTCATCTTGTTCCCTGGGATCTTTCTCCCTAATAAAGGAAAAGCTCATAG	2444	ENST00000422732	Ensembl	-	47099716	47096453	noncoding
ASHG19A3A018445	5	14.5375	8.0423	67.1005	63.0039	49.0824	60.4415	2.37766	4.21284	3.32816	5.93345	5.91971	5.51677	5.71739	A	A	A	P	P	P	P	chr20	RP4-530I15.6	ACACAGGATGTTCCTGTTGGTCCAGATACTTGAGCTAAAAGGTGATGGATACCTGGATGT	638	ENST00000452336	Ensembl	+	49276828	49262007	noncoding
ASHG19A3A031693	18.7896	15.2623	10.7707	50.8912	56.542	56.2799	69.2146	4.39816	4.2701	3.71833	5.52555	5.75236	5.72021	5.92416	A	P	A	P	P	P	P	chr6	RP11-462G2.1	GCCGAACAGATGAAAAAATGCATTGTCAACGGAATCTTTTATGTTTGTTTGTCTTCCTTT	397	ENST00000418403	Ensembl	+	71109120	71104589	noncoding
ASHG19A3A012641	70.1925	68.1064	60.8069	208.812	184.267	156.082	221.657	6.26622	6.22461	6.10027	7.63697	7.52158	7.2437	7.6794	P	P	P	P	P	P	P	chr1	RP4-781K5.6	GGTCTGACACCCCATGACCTTTTTTGAGATTTGAGGTTATGCCATGTATTTGAGAATAAA	3564	ENST00000442382	Ensembl	-	234831900	234805268	noncoding
ASHG19A3A049311	22.9114	18.882	26.923	50.2519	36.6987	45.3661	46.9573	4.68637	4.53462	4.97826	5.50418	5.10099	5.39947	5.34121	A	P	P	P	P	P	P	chr13	AK127292	TATTATTAAATCCAGAAAGTCTGGGGTTCCATTTTTAGCACAAGGCAGGCAGCCCACGTG	4914	uc001upb.1	UCSC_knowngene	-	24523454	24481604	noncoding
ASHG19A3A039839	583.142	658.271	620.143	246.589	470.832	492.376	521.45	9.12635	9.29255	9.26245	7.89504	8.94659	8.98338	8.98546	P	P	P	P	P	P	P	chrX	RP11-1148L6.5	TAAGAATAATGGCATGAACTGCTTTTAACAATTTAGAAAAGACCCATTCCCCCCGCCCCC	450	ENST00000453810	Ensembl	-	48439545	48438161	noncoding
ASHG19A3A015651	308.736	308.369	248.82	551.934	541.739	501.232	610.023	8.28233	8.27205	8.01758	9.13938	9.16414	9.01561	9.22347	P	P	P	P	P	P	P	chr2	AC010967.3	AGAGACTCTCTGTATAGCTCTGCCCTCCTGAATTGCATGTCCAAATTGCATTGGAAAAAA	333	ENST00000418451	Ensembl	+	53093769	53091372	noncoding
ASHG19A3A024220	14.4982	16.9731	11.4097	33.7096	30.7759	29.3026	29.2861	4.03499	4.40384	3.79813	4.89754	4.83915	4.74084	4.62404	A	A	A	P	P	P	P	chr1	RP3-380B4.1	TTAGAAGGGTTTTGCTGCTTGCAAAATGAAATTAAACCTGCACACTTATTTCTGTTCTCT	458	ENST00000448001	Ensembl	+	69901092	69898937	noncoding
ASHG19A3A029676	60.3475	88.4167	58.8846	96.3444	82.0539	86	94.9258	6.04223	6.58064	6.05542	6.48165	6.3111	6.34455	6.39188	P	P	P	P	P	P	P	chr6	XXbac-BPG27H4.8	AGAATTTCCTTGTAGACACTTTTCAGGCCTTTGTTTGCTGGAGACTGGAGTTCCCTGAGA	799	ENST00000442852	Ensembl	-	30815936	30807302	noncoding
ASHG19A3A049630	28.4052	32.5413	27.9972	27.6979	42.9616	37.37	39.3869	4.99165	5.23892	5.02964	4.60492	5.33676	5.10808	5.07259	P	P	P	P	P	P	P	chr13	RP11-473M10.2	AAGTCAGAGACCTACAGGGAAATGGGGATCAAAAGCTCTCATCACTCCAGATGCTACAAA	415	ENST00000451570	Ensembl	-	64312151	64241814	noncoding
ASHG19A3A043529	23.0841	102.073	14.6172	17.0981	28.757	30.808	30.8373	4.6987	6.78085	4.13073	3.85723	4.74012	4.81842	4.70037	P	P	A	P	P	P	P	chr10	BC037918	AAATATAAAGGAAAGAGCAAAAGGTAGAGCAAGTAGGTTTCGGGCTTGGTGGAGTAGCTC	949	uc001igy.1	UCSC_knowngene	+	3791666	3360886	noncoding
ASHG19A3A051923	28.0041	28.8413	20.5363	55.4328	48.2302	45.6926	54.4224	4.97019	5.07598	4.60386	5.64525	5.5116	5.40983	5.56306	P	P	P	P	P	P	P	chr15	AC124997.1	AATAAAAGTGTTTGAAGCTGAAGCTGGGTCTTCCATCCAAATGTGGAAAGCGTGCCAGAG	2491	ENST00000422117	Ensembl	-	25823938	25729977	noncoding
ASHG19A3A009143	6.05545	12.4141	5.19435	47.4496	45.1341	41.2263	37.8667	2.90094	4.02364	2.8313	5.41319	5.41462	5.25225	5.01577	A	A	A	P	P	P	P	chr17	AC005863.2	TTGCATTTTCTGAGGCCCACGATAAGCACCCAACCGTTAATATTTCCATGCTTCTCTGTC	627	ENST00000445035	Ensembl	+	14803871	14741278	noncoding
ASHG19A3A030869	1132.85	1319.12	1238.46	1045.43	1088	1042.93	1234.61	10.0239	10.2407	10.2022	10.1089	10.2016	10.1172	10.3082	P	P	P	P	P	P	P	chr6	RP3-416J7.2	TTGAAAAATCTTCCCCACATTTATTATGCAAAAGCAACCGACGGAGGAGCGCCTGCTGAT	844	ENST00000441203	Ensembl	+	226400	224949	noncoding
ASHG19A3A019641	62.9496	75.4599	60.4275	66.8866	63.4404	66.8925	75.1444	6.10417	6.36411	6.09068	5.92812	5.92819	5.98131	6.04815	P	P	P	P	P	P	P	chr22	RP1-213J1P__B.1	ATTTCTCCTTTCCAAGCATCTCTCATGGAAGGCATCTTGGATGAAAAGACCTTTGGCAGC	819	ENST00000440255	Ensembl	-	28110959	28072555	noncoding
ASHG19A3A015385	21.2748	13.8371	19.3162	21.6088	17.4537	17.4269	20.8914	4.574	4.15342	4.52196	4.21837	3.98223	3.94377	4.09364	A	P	P	P	P	P	P	chr2	AC012506.2	AGAAATCTCAAAATGGAGAGGACAAAGGCAAAGACAGTGAGTTTCCCAGGAAGCCCCAAA	892	ENST00000415245	Ensembl	+	23574735	23570524	noncoding
ASHG19A3A040294	95.7518	97.6034	83.5379	92.9867	92.7525	93.048	115.166	6.69759	6.72132	6.54437	6.43021	6.48999	6.46344	6.68852	P	P	P	P	P	P	P	chr1	RP11-400N13.2	GGAAGAACCTGAGAGATAATCCATTTTATGAAATTTTCCCTACCCTGAAATGGGAGAATG	1148	ENST00000441160	Ensembl	+	222158306	222139751	noncoding
ASHG19A3A035288	21.3005	34.0128	19.2531	33.8265	28.5511	37.1105	36.3513	4.57561	5.29403	4.51599	4.90202	4.72834	5.09824	4.95599	P	P	P	P	P	P	P	chr1	RP11-160H22.3	ACAGGAAAAGATATGGCCCATAGAAGGGCTCCTGAAATCTAACCTTGCGACTCTTTAAAA	335	ENST00000424181	Ensembl	+	173992123	173991646	noncoding
ASHG19A3A000036	17.1913	14.5818	15.5079	26.7218	25.658	139.018	26.8849	4.26397	4.21618	4.21837	4.55089	4.55981	7.06368	4.48698	A	P	A	P	P	P	P	chr1		TTGCCCAAAGCCACAAGGATGAAAGGACTTTTCCAGTTGCTACCAGACTACGCACTGTCG	728	BC039533	RNAdb	-	22352541	22350487	noncoding
ASHG19A3A014074	7285.2	7163.96	5765.82	3470.25	3486.42	3561.87	3579.13	12.6418	12.6342	12.3851	11.8676	11.906	11.9093	11.8561	P	P	P	P	P	P	P	chr2	AC159540.3	TTCATGTTCCACCTTCCCCTCTTCCCCGCTATTCCACAGGGTCTGGAGGAGAAGAGCAGA	555	ENST00000422600	Ensembl	-	98071970	98069547	noncoding
ASHG19A3A039555	50.5944	74.3515	61.2381	78.2382	84.8583	76.3827	68.2643	5.79947	6.34335	6.11111	6.17024	6.35646	6.17123	5.90324	P	P	P	P	P	P	P	chrX	RP11-733O18.1	CTATGGAAAAAGCAACCTGGAGAAGAATTTTAGCCTCCCAAGCATCACCATAGTTGTCCT	860	ENST00000422914	Ensembl	-	5644346	5571461	noncoding
ASHG19A3A020355	21.7555	12.4545	6.11074	92.6453	82.6915	86.658	77.8357	4.60599	4.02798	3.00468	6.42506	6.32081	6.35535	6.09988	A	P	A	P	P	P	P	chr22	RP1-90G24.6	ATGCTCATGAGAAAACACAGTGATAGACGCCTTTTCTAAACAGTTTCTGCTTTGTTTGGG	590	ENST00000452181	Ensembl	+	32673173	32669406	noncoding
ASHG19A3A039529	255.439	292.512	262.484	583.84	511.144	516.44	568.227	8.0248	8.19849	8.09322	9.21983	9.08077	9.05543	9.12587	P	P	P	P	P	P	P	chrX	NCRNA00106	TGCCCGCCACAGGTGCTCTCTGCTCCATCTCAGGTGACCACTGGCCATCTCGGAAGAAAC	357	ENST00000434938	Ensembl	-	1517852	1515319	noncoding
ASHG19A3A022300	10.6052	29.3077	7.86385	17.5296	19.7325	10.3971	21.215	3.60277	5.0965	3.29796	3.89859	4.17205	3.1292	4.11958	P	A	A	P	P	A	P	chr1	RP4-683M8.2	TGATGAGATCCGTTGTAACAATCATTCTGGCAAAGGTGTGGAGATGGCTCAGAGGATTGA	789	ENST00000439795	Ensembl	+	48532873	48519880	noncoding
ASHG19A3A043600	6.06453	13.7574	6.8937	128.101	124.455	132.663	158.864	2.90283	4.1465	3.1425	6.89954	6.93301	6.99714	7.17446	A	A	A	P	P	P	P	chr10		GCAGAAGCTTCTCAAGCAGGAATGCATTAAGTTTTGTTTTGTCTTTTAAAAACCTCACCC	1712	CR616893	misc_RNA	+	10991763	10990055	noncoding
ASHG19A3A040866	17.8398	19.3673	13.5451	50.9541	42.5158	50.4458	51.2903	4.3222	4.56618	4.02534	5.52753	5.32104	5.55591	5.47092	A	P	A	P	P	P	P	chrX	RP5-1172N10.2	TTTTGCACACTAATTAATAAACTACTGCAACGGAAAAAGAGAAAGCAGGCAGAATGCAAA	835	ENST00000452501	Ensembl	+	41136031	41134991	noncoding
ASHG19A3A048563	12.7436	15.5014	18.9705	33.8267	32.5484	33.2966	33.6926	3.85359	4.28989	4.49457	4.90213	4.9222	4.93	4.83521	A	A	P	P	P	P	P	chr1	RP11-14O19.1	AACTTGAGATAAGTCCCAGAAAATTGGAGGATGTGGAGACCAGGATGCCTCATTGCACAA	602	ENST00000438093	Ensembl	-	95817810	95816806	noncoding
ASHG19A3A037461	623.584	619.885	602.628	42.1328	41.7659	40.8349	48.9825	9.22868	9.21582	9.22109	5.2333	5.29655	5.23858	5.40212	P	P	P	P	P	P	P	chr9	RP11-292F9.2	GTCAGCACTTTGCCGAAAACCTCAAATAAAGACTTTTTTAAAAATGTGCGATGGAAAACT	528	ENST00000452477	Ensembl	-	46380257	46359241	noncoding
ASHG19A3A045927	24.5096	158.391	32.1619	48.0207	39.6967	45.7505	46.9129	4.78464	7.37712	5.22011	5.42845	5.21829	5.41217	5.33978	P	P	P	P	P	P	P	chr1	RP5-857K21.1	TCCTGATTAATGGCCGATGAATTTCTCCTTAAGGCCCTGAAACTGCCTACTCAGAACCAA	842	ENST00000417636	Ensembl	-	523833	521368	noncoding
ASHG19A3A020117	14.5777	15.0005	11.9007	31.3157	32.7	35.1066	35.0623	4.04235	4.24932	3.85359	4.79021	4.92814	5.01225	4.89894	A	A	A	P	P	P	P	chr22	AC011718.3	ATATCTACGCTTGTTCAGGCCAGCCAACATACGACAGTTTACTTCAAGACAGGAGACATG	375	ENST00000413504	Ensembl	+	20645991	20644407	noncoding
ASHG19A3A039797	5	5.51079	5	17.6738	17.0561	17.4746	17.8128	2.37766	2.57168	2.39437	3.91102	3.94689	3.94907	3.84298	A	A	A	P	P	P	P	chrX	RP1-30G7.2	GGCTGAACTTCAAAACAAAATCATGTTGGAGAATTAAGTCTCGTTCCCAGATTTAATTTC	626	ENST00000446884	Ensembl	-	46187080	46185358	noncoding
ASHG19A3A031016	417.546	470.004	474.281	771.837	634.747	631.066	730.672	8.69639	8.84467	8.89568	9.64796	9.4013	9.35752	9.50073	P	P	P	P	P	P	P	chr6	RP11-401E14.2	TTAATTGGTTCAGTTTTCTTCCATTTCTCCTGAGCTCACCCTGACCCTATGCACTGCTGA	845	ENST00000451285	Ensembl	+	16000028	15995174	noncoding
ASHG19A3A052391	29.52	25.69	26.0258	29.5532	27.5467	16.9787	27.8863	5.04635	4.91967	4.93056	4.70176	4.67161	3.90313	4.54384	P	P	P	P	P	P	P	chr1	CTA-215D11.3	GGGAGGATGCAAATTTTCATGTTTGCTTTTCACCTGAATGTATCAAATTTCACTATGCTT	410	ENST00000423628	Ensembl	-	8066784	8066073	noncoding
ASHG19A3A047299	17.7954	14.8647	17.7467	37.2324	32.1546	32.549	47.4653	4.31912	4.23835	4.39756	5.04621	4.9039	4.89957	5.35759	A	P	P	P	P	P	P	chr1	RP11-415A20.1	ACTCACCTTGGACTCATCGCTGACTTGTCAACCAGAACTCCAATATCTGAGTTTGTCAAG	448	ENST00000427806	Ensembl	-	77244952	77223808	noncoding
ASHG19A3A042384	18.4611	19.9901	22.6834	15.4495	18.8016	18.0589	17.5079	4.37066	4.60555	4.73451	3.70028	4.10567	4.00054	3.81571	A	A	P	P	P	P	P	chr10	RP13-463N16.6	ATCACTTGCAGAAAACAAAAGAGAGCAAGAGAGAAGACAGTGGGTGAAGTCCTGGTTCCA	697	ENST00000478294	Ensembl	-	5638081	5636953	noncoding
ASHG19A3A039535	87.9536	92.2679	102.909	134.776	137.635	126.621	148.004	6.57731	6.644	6.82629	6.97588	7.08241	6.9263	7.07315	P	P	P	P	P	P	P	chrX	NCRNA00102	GAGAAAGAATGTCATTTGTAAATCAACTGTGCTGCCTGGACCCAGTTGGGACTCTGAATC	1340	ENST00000445785	Ensembl	-	2533388	2531028	noncoding
ASHG19A3A020068	43.4042	39.0583	46.8554	74.8953	63.8189	83.9203	64.9875	5.58525	5.47902	5.73964	6.10149	5.93788	6.30732	5.8285	P	P	P	P	P	P	P	chr22	DGCR5	ACTTCAGCAATGTGGCACGCAACGTGCAGTGGACGTACCTGCAGCCCTTTGTCATCGTCA	568	ENST00000421572	Ensembl	+	18978396	18958095	noncoding
ASHG19A3A038107	43.0858	45.2393	92.5678	93.794	91.2136	83.9307	94.7031	5.57361	5.67579	6.67804	6.4425	6.46174	6.30744	6.38792	P	P	P	P	P	P	P	chr9	RP11-65J3.3	ATAACTGGAAACAGTGACCAATCTGCTGCCGTTCACCATCTTGGTTGCAAATATCACTCC	1846	ENST00000436510	Ensembl	-	132209569	132192930	noncoding
ASHG19A3A015254	14.5117	13.687	10.8671	31.1921	21.307	20.1633	25.4595	4.03642	4.14088	3.73167	4.78245	4.29007	4.17483	4.4068	A	A	A	P	P	P	P	chr2	AC141930.2	AATCTGTGGTAACGAATGTGCAGCCAGCATTCTGTCTTGACTGAGTGGTTGTTGCTTGAA	555	ENST00000419028	Ensembl	+	1584083	1576325	noncoding
ASHG19A3A042230	25.9002	56.0881	25.3431	91.451	80.0084	80.5684	92.9953	4.86699	5.96229	4.8896	6.40627	6.26954	6.24868	6.36139	P	P	P	P	P	P	P	chr1	RP11-136B18.2	AAATTTGGGAGAACGAAATTATCATCTCACATCTGCCACCAACTGCTGTTAGCTGTAGAA	197	ENST00000422844	Ensembl	+	238450316	238439336	noncoding
ASHG19A3A039749	135.882	161.739	108.473	584.933	560.703	467.471	597.475	7.17342	7.40491	6.9004	9.22383	9.20962	8.89974	9.19496	P	P	P	P	P	P	P	chrX	RP11-157D23.1	AAAGATCTTCAAACCTGGAAGGCTTGCTTCAAACCCCAGCTCTACTCCAACTACAGGATT	880	ENST00000431646	Ensembl	-	39251028	39226538	noncoding
ASHG19A3A013772	5.52836	5.04441	5.19789	15.208	17.2676	16.1711	18.6329	2.8039	2.32375	2.83255	3.67211	3.96383	3.82689	3.91316	A	A	A	P	P	P	P	chr2	AC007403.1	GCTCAATGTTTTGGAGGAAATCCCTTCTATAGCAGTGGAAAGAAGGCAGCTCACTTTGGA	397	ENST00000444266	Ensembl	-	67149589	67148641	noncoding
ASHG19A3A029392	76.7724	62.4858	70.7567	145.653	138.564	121.613	151.657	6.3947	6.10722	6.30609	7.09181	7.09496	6.86721	7.1085	P	P	P	P	P	P	P	chr6	RP11-354I10.1	GTCACTTAAAATATGATCCTTGGATAAACATCACATGCTGCTGGCCTTCTTACAAAATGA	661	ENST00000431369	Ensembl	-	9162010	9124453	noncoding
ASHG19A3A000140	44.6367	47.1321	48.6103	92.8324	81.0534	79.7866	91.0981	5.62297	5.73277	5.79269	6.42772	6.29101	6.23505	6.32889	P	P	P	P	P	P	P	chr20	RP11-49G10.8	TGGAGTTTCTTCCCAGCTCCTTAATGTGGGGCATTCTTTACAGATTTGACTCAAGGACTC	570	ENST00000420169	Ensembl	+	31792975	31786014	noncoding
ASHG19A3A009398	11.7538	5.09006	39.8546	20.66	18.124	16.5431	22.7512	3.73832	2.32561	5.5162	4.1497	4.0402	3.86508	4.22953	A	A	P	P	P	P	P	chr17	AC011193.1	AAGAGAATAAACTGAAGTCCCTAGAGGCCAAGGGTCTCACCTAAGTGGTCATATCCTACA	323	ENST00000441287	Ensembl	+	32806976	32806352	noncoding
ASHG19A3A030911	5	83.9024	5	122.253	133.563	134.665	148.769	2.37766	6.5078	2.39437	6.83369	7.03791	7.01672	7.08063	P	A	A	P	P	P	P	chr6	RP1-140K8.1	TCCTACACGAGAATGCTTCTTGGATTTGCCGTAAAACAGACTAAAAGAACGACAGGTGAA	441	ENST00000450255	Ensembl	+	3894524	3893359	noncoding
ASHG19A3A049310	115.907	115.928	98.0268	33.137	29.0318	33.4148	34.2455	6.95832	6.95132	6.7591	4.86948	4.75427	4.935	4.86197	P	P	P	P	P	P	P	chr13	RP11-45B20.4	GGCAGTGAATATGTGGTGACAAAGTGAGAAACACTTTAGCAGAAGGCGGAACAAATTAAC	2796	ENST00000442969	Ensembl	-	24520921	24513695	noncoding
ASHG19A3A033834	10.8238	14.41	18.0506	415.116	390.631	379.314	409.802	3.62745	4.20204	4.42231	8.69182	8.65115	8.57854	8.60962	A	A	P	P	P	P	P	chr7	AC093627.10	AATGCAAGAGGCTGATGACTCCAGATCCCTTATATAAGCCAATAAAAAGTAGTTTCATTT	5008	ENST00000484550	Ensembl	+	155465	149596	noncoding
ASHG19A3A017099	19.2164	38.0718	15.828	21.5109	14.3084	21.3632	21.1959	4.43239	5.44583	4.24691	4.21103	3.66348	4.26301	4.11817	P	P	A	P	A	P	P	chr1	RP11-473A10.2	TTATAACTATTTTACAGTTCTGGGCGTCACGGAATCTTGCATGAAGAGCCCCTAACCTGG	610	ENST00000430540	Ensembl	+	18076473	18044181	noncoding
ASHG19A3A051792	423.178	598.641	436.947	1341.4	1286.9	1153.24	1404.89	8.7162	9.1628	8.78942	10.4876	10.4528	10.2726	10.489	P	P	P	P	P	P	P	chr14	AK094562	AGGATTCAGAGAACCCCCAAATGTCAGGGCTGCTCCCTTCTTGTCCTGCCTCTCTGCTCA	2638	uc001yjz.1	UCSC_knowngene	+	101539271	101536247	noncoding
ASHG19A3A040233	52.1114	42.7991	40.7125	80.174	66.2165	59.6387	82.704	5.84106	5.60298	5.54721	6.20887	5.98965	5.80337	6.18925	P	P	P	P	P	P	P	chrX	AK026512	GGTCATTTCTGTCTCTTATATTCCTAGGTTTCCCTTTATAAGGATTAGTCAGATCAACAT	994	uc004elm.1	UCSC_knowngene	-	103174131	103172239	noncoding
ASHG19A3A033964	5	10.7709	12.8092	19.1539	18.3229	21.288	16.5892	2.37766	3.85344	3.95205	4.03755	4.05919	4.25646	3.73101	A	A	A	P	P	P	P	chr7	AC006373.1	AGTTTCAGTAGAAGAAACTTCACCTAACCTCTTTAATTCCAACAGTTCTTGAATTTCCTG	361	ENST00000451755	Ensembl	+	10021444	10000650	noncoding
ASHG19A3A018669	5	26.6514	5	12.5507	19.6082	20.6325	21.6775	2.37766	4.97412	2.39437	3.35981	4.16246	4.20912	4.1567	P	A	A	P	P	P	A	chr21	AL157359.4	ATTCATTCCAATCTAGAAGACTGCCTGCAAGCAATGCGAACACGTGTGTCTAGTTTCTTG	784	ENST00000440372	Ensembl	-	20308177	20290251	noncoding
ASHG19A3A013190	20.0953	18.398	7.60377	28.3961	24.3839	20.7527	30.285	4.49398	4.50324	3.2533	4.64021	4.48523	4.21855	4.67114	A	P	A	P	P	P	P	chr2	AC116609.1	CAAAAGAAAGCAAGAGCCAGGCCTCACTCACTAAGCTAAAAGGAAATGTATAAAACAAAC	493	ENST00000433724	Ensembl	-	731195	724965	noncoding
ASHG19A3A009850	391.443	394.758	403.082	398.86	328.193	383.978	403.211	8.60597	8.61483	8.68905	8.63104	8.39642	8.59672	8.58713	P	P	P	P	P	P	P	chr17	AC005332.1	CACTGTAGCTCTCTACTGAAATGTTTTAAGGATCATTGTAATTCTGCTTTCCCTAATCTT	707	ENST00000435469	Ensembl	+	66111659	66097707	noncoding
ASHG19A3A013817	177.164	217.994	164.165	398.409	337.801	343.678	364.162	7.53351	7.81092	7.46005	8.62949	8.43893	8.42578	8.43169	P	P	P	P	P	P	P	chr2		TATCTCTACTTCTACTTCTGTGGCACAGAAGGGCTCCCCAGCTCCTATTCCCTGAATCCT	1801	AK124090	misc_RNA	-	70630930	70629126	noncoding
ASHG19A3A038146	119.905	115.129	141.624	252.837	227.34	227.753	262.118	7.00576	6.94096	7.26449	7.93472	7.84105	7.81146	7.93849	P	P	P	P	P	P	P	chr1	LOC641515	TTTTCTGTCTCCTGCCTTTTCCAGAAGTCTGTTGAACTCAAAGGGCTGAATGACAGCAGT	2796	uc001gyh.2	UCSC_knowngene	+	202796339	202789393	noncoding
ASHG19A3A000095	52.8882	56.623	55.435	19.5336	88.2368	19.4153	24.0492	5.86223	5.97458	5.96987	4.06638	6.41294	4.11401	4.3186	P	P	P	P	P	P	P	chr1	RP11-396C23.2	GCACGTGCCCAATCCCGTGGCGGGGGCTGGAACACAAACGGGGTGGTGTTCCAGCTGCAA	407	ENST00000412855	Ensembl	+	226277993	226274581	noncoding
ASHG19A3A051430	39.0412	34.3058	43.6939	53.2329	55.6363	52.7108	58.9251	5.43522	5.30641	5.64501	5.58918	5.72856	5.62405	5.68158	P	P	P	P	P	P	P	chr1	RP11-441L11.1	AAGTTTGAACAAACACTGCCACCTGATGCATGAAAGCTCTACTGTGACCTACGTTAAAAG	701	ENST00000437831	Ensembl	-	146989699	146986157	noncoding
ASHG19A3A030482	17.8483	24.9849	25.9817	42.9256	34.9444	42.5072	41.4749	4.32316	4.88785	4.92794	5.25887	5.02964	5.30216	5.1557	A	P	P	P	P	P	P	chr6	RP11-138M12.1	TTCACAGGAACTGCATATGGGCCTGCTACTTGTGTCAAAATGTGACTGAACTCTCTTCCA	281	ENST00000430672	Ensembl	-	125766329	125746772	noncoding
ASHG19A3A043053	15.1242	9.40717	15.0491	23.863	21.3985	30.5871	26.1496	4.0893	3.70358	4.17675	4.37465	4.29667	4.80914	4.44507	A	A	A	P	P	P	P	chr10	AK097624	ACTGAGTAGCAACTCCATTCTTGAAAGGGAACCTGAGAAACCTATCTCTATGTCTGCCAC	2047	uc001kdj.1	UCSC_knowngene	-	86958694	86953176	noncoding
ASHG19A3A015269	34.4789	32.2913	26.1544	61.0323	44.4549	52.7753	68.2492	5.26474	5.22752	4.93821	5.79269	5.38874	5.62583	5.90282	P	P	P	P	P	P	P	chr2	AC010729.2	GTCTCCTGAGCATCTGTTGCCAGTGTAATTTCATGACAATCATCAATATGTATTGAATAA	1746	ENST00000413960	Ensembl	+	5870474	5866580	noncoding
ASHG19A3A050486	36.0979	38.7533	31.4715	63.7715	53.1348	48.8756	43.8698	5.32898	5.46891	5.19015	5.85831	5.65593	5.50967	5.23971	P	P	P	P	P	P	P	chr13	RP11-551M15.1	TTCTAAGGCAGTATTTGTTTCAGGCTTTGCGACCAATCAGCAGTTTTCACACCCAGTCCT	650	ENST00000422994	Ensembl	+	111755444	111748184	noncoding
ASHG19A3A042434	636.659	706.748	717.301	1161.52	1022.62	1070.45	1211.08	9.25689	9.38736	9.45957	10.2673	10.1156	10.1621	10.2691	P	P	P	P	P	P	P	chr10	LOC254312	CCCACCCTCTCGCAGCTACGTGCCAGTTCCAGAGCACCTGTTCCCCTCTACTTTGAAAAG	1127	NR_015413	RefSeq_NR	-	10994126	10976903	noncoding
ASHG19A3A047029	5	10.6902	5	36.8216	21.9089	31.4787	20.7022	2.37766	3.84539	2.39437	5.02868	4.32742	4.84867	4.07878	A	A	A	P	P	P	P	chr1	RP11-74K19.1	CCAATGATGTCATTTAACAGTTTGTTTGTTGGTGATCTCTACTGCTGAAATCTCATTAAC	434	ENST00000439878	Ensembl	-	69715106	69709054	noncoding
ASHG19A3A049626	40.36	46.8528	40.8328	70.0909	67.9968	60.0833	76.5502	5.47884	5.72285	5.5521	6.00083	6.03157	5.81559	6.07498	P	P	P	P	P	P	P	chr13	RP11-71L7.1	GGATTTAGAGTCAAATAGGCAGGTGTTTTGATTCTACCCTTGCTAACCCTGTGACCTTTG	708	ENST00000432697	Ensembl	-	62603681	62578225	noncoding
ASHG19A3A030849	534.536	626.558	590.058	1352.3	1250.6	1046.39	1357.18	9.01472	9.22753	9.18762	10.4969	10.41	10.1222	10.447	P	P	P	P	P	P	P	chr6	XXyac-YX65C7_A.3	ATAGAAAATGTTCTGTCTTTGAAGCACTCCAGCCATTTGTTCCCACTGAGCTTGGCTCTG	479	ENST00000435612	Ensembl	-	169689311	169686628	noncoding
ASHG19A3A029421	70.6715	72.0388	68.9595	153.417	111.362	131.556	153.188	6.27722	6.30091	6.27126	7.16859	6.76358	6.98357	7.12451	P	P	P	P	P	P	P	chr6	RP11-125M16.1	CCGTGCAAATCCTGTTTTCCTTGCATTGTTTCCTGCATGTGAATATCATCAGTCTAGCAG	894	ENST00000457945	Ensembl	-	12585636	12583146	noncoding
ASHG19A3A043825	17.5401	20.1603	14.7154	26.8533	23.9155	29.7168	36.6426	4.29586	4.6163	4.14039	4.55921	4.45573	4.76397	4.96657	A	P	A	P	P	P	P	chr10	LOC100129055	CCTCCTGAAAAAGTATCACTTATGGAATGCAGAGCTTAGAGATTGAAGTATTGATTGCAG	2799	NR_024524	RefSeq_NR	+	38503272	38464598	noncoding
ASHG19A3A040643	1783.57	1852.84	1815.72	2424.9	1791.42	2464.3	2682.17	10.6548	10.7183	10.7444	11.3478	10.9316	11.3805	11.4334	P	P	P	P	P	P	P	chrX	NCRNA00103	CCTTGTTCCCAGGGTCCACATTTAGTTTTATCTTTACTGCATTGCTTTTATGAAAAAGAA	984	ENST00000430562	Ensembl	+	2556370	2527434	noncoding
ASHG19A3A020058	17.7373	17.4688	17.8195	36.2527	22.0532	24.3385	27.4888	4.31369	4.43903	4.40358	5.00779	4.33623	4.46388	4.52026	A	P	P	P	P	P	P	chr22	FLJ41941	GGGACAGAAATGGAAAGGAGACTTATTTTTCACTGGATATGCTTTTGTACATTTTATGGC	2379	NR_024417	RefSeq_NR	+	18520734	18512150	noncoding
ASHG19A3A024967	65.2265	60.5224	58.6094	4852.02	5107.54	4501.55	5596.13	6.15793	6.0629	6.04865	12.3663	12.4672	12.2621	12.5158	P	P	P	P	P	P	P	chr1	RP5-887A10.1	CCATACCTTGGGCCAATGTAACTGTTAACAGCTTGAAGCTATTAAAAATGTACCAATGGA	591	ENST00000443104	Ensembl	+	81112473	81001439	noncoding
ASHG19A3A032347	634.11	565.706	521.98	25443.4	29346.9	28506.5	32240.2	9.25077	9.08518	9.02124	14.8282	15.0196	14.958	15.0671	P	P	P	P	P	P	P	chr6	RP1-125N5.2	TGCCCTGGGTCCCTTGGAATAAGCTTGATTTAATTATCAAATTACATGGAAAGAAATAAG	557	ENST00000436492	Ensembl	+	169123604	169116744	noncoding
ASHG19A3A043835	80.3131	99.1605	78.6943	265.888	216.552	213.524	268.689	6.45933	6.74209	6.45702	8.01182	7.76844	7.7135	7.97628	P	P	P	P	P	P	P	chr10	RP11-453N3.2	AACCTAATGGAACCTGGGCTTTGTGCTTCTGCTTGATAATCAGTTCTTTAGTTGAATGGC	493	ENST00000423877	Ensembl	+	39012607	39006325	noncoding
ASHG19A3A032357	10.0755	10.997	22.9185	134.108	131.513	118.401	132.186	3.53856	3.88114	4.74807	6.96822	7.0152	6.82583	6.89501	A	A	P	P	P	P	P	chr6	RP5-894D12.3	CAGTTGGGCTTCTCCAAAATGGAAATAGTCACTTGTTTGAGCAAATAAATGTAATGAAAG	318	ENST00000422894	Ensembl	+	170588557	170584461	noncoding
ASHG19A3A019019	56.8687	95.267	58.2055	221.784	195.406	180.558	194.483	5.96448	6.68812	6.04121	7.73049	7.61041	7.46225	7.4838	P	P	P	P	P	M	P	chr1	RP1-212P9.2	GTACCAAGTACTCAACCTTCTGTTTTCTCAATAAAGTGAGCCCTCTTCTCGGTGTCTGCA	1746	ENST00000443593	Ensembl	+	29197779	29194086	noncoding
ASHG19A3A029275	1255.58	1259.07	1267.02	675.931	534.882	656.662	633.21	10.1618	10.1771	10.2308	9.44302	9.14601	9.41692	9.28307	P	P	P	P	P	P	P	chr1	BX004987.3	AGAAAGAAAGATTGGGAAAACGTATCCTCAGCAATTTCCCAAGAAACTGAAGGAAAAGCA	943	ENST00000430699	Ensembl	+	143376699	143347969	noncoding
ASHG19A3A030852	39.9037	38.6327	33.748	59.2716	60.207	51.5206	78.3445	5.46325	5.46476	5.28308	5.74782	5.84895	5.58662	6.10877	P	P	P	P	P	P	P	chr6	AK055570	GTGCCGGGGAGGTGTGGCTCACTAAGCTAAACTCAACCTCATCAGATAAAATAATTAGTT	2282	uc003qwu.1	UCSC_knowngene	-	169788480	169773775	noncoding
ASHG19A3A017366	17.5237	25.9831	19.5115	31.9805	24.7161	28.9934	35.4531	4.29383	4.93698	4.53452	4.82284	4.50511	4.7279	4.91561	A	A	P	P	P	P	P	chr20	RP4-796I8.1	CATAGCACTCAAGATCCACCACACTGACTTCTTTAAGGGAAATAAAATGGAGCTCTCTGC	280	ENST00000455132	Ensembl	-	12224944	12224542	noncoding
ASHG19A3A037371	15.1964	20.6809	12.1788	40.2023	45.7821	41.7795	43.5564	4.09535	4.64972	3.88097	5.16163	5.43561	5.27499	5.22916	A	A	A	P	P	P	P	chr9	RP11-347J14.7	GAAAAGGTCCCTGATGATAGAACTCCCTGAGTATTCTTGCAGAAATGAATATCCACCAGG	1077	ENST00000423499	Ensembl	-	39397403	39395733	noncoding
ASHG19A3A016193	26.1058	20.8466	23.9528	36.9438	40.7137	37.0144	56.3907	4.87795	4.65841	4.80774	5.03448	5.25728	5.09461	5.61638	A	P	P	P	P	P	P	chr1	RP11-219C24.10	TTAGCCAAGAGCCTCAGCTTCCTGTAAAATGAGGATGATGATGTCCAACAGCTTATGGGA	378	ENST00000432559	Ensembl	+	13430107	13429633	noncoding
ASHG19A3A040855	80.0196	83.8561	86.4726	151.034	143.92	148.996	159.051	6.45432	6.50723	6.59185	7.1476	7.15065	7.17086	7.17632	P	P	P	P	P	P	P	chrX	RP11-320G24.1	AAATTGACCTCAAAATTTCAGTAGATGAGAGGACTGTGGCTGGCCTGTGTCTTTGGCACT	3000	ENST00000452690	Ensembl	+	40146973	40122169	noncoding
ASHG19A3A008919	15.3855	18.0195	12.7244	26.4027	23.9769	35.0036	36.4914	4.11202	4.4776	3.94294	4.5323	4.46021	5.00766	4.96208	A	A	A	P	P	P	P	chr1	AF510427	TCTAAAACATCATTCCCGTAATCCCTGATCAACAGAAAGGAAGCTCTGGAAGCATGAATG	601	uc001gro.2	UCSC_knowngene	-	185597620	185527513	noncoding
ASHG19A3A045318	69.3924	90.7122	93.5202	151.399	142.271	145.858	166.965	6.24806	6.61829	6.69336	7.15065	7.13243	7.13838	7.24642	P	P	P	P	P	P	P	chr11	AP003774.1	TGGAAACACCCAGCTCTCCACCAAGATAAACCACGCGAGCCACAGCTTGCGGGCAATATC	672	ENST00000447028	Ensembl	-	64096976	64092521	noncoding
ASHG19A3A045719	9.65237	15.5477	5	58.2376	28.3454	49.0192	23.3881	3.4738	4.29242	2.39437	5.7195	4.7163	5.51501	4.27517	A	A	A	P	P	P	P	chr11	AP001891.1	CCAGACCTTTTTCTGTCTTCAAATTCAGCTCAAGGTATGTTTTCCTTTTTCAACAACAAA	921	ENST00000452629	Ensembl	-	116371347	116367615	noncoding
ASHG19A3A019104	37.4702	42.2713	52.5247	125.491	117.706	104.249	112.121	5.37842	5.58676	5.89587	6.87241	6.84793	6.63309	6.64579	P	P	P	P	P	P	P	chr21	AK124194	TAGGATCACCTCTGTCCAGTAGCTGTTATCCAACATCTGCATACTTAGATTTCTGGAGAG	2908	uc002yli.1	UCSC_knowngene	+	25862621	25801053	noncoding
ASHG19A3A039834	582.243	646.702	662.438	825.176	757.854	701.481	854.528	9.12509	9.26757	9.3523	9.75102	9.66315	9.52295	9.74162	P	P	P	P	P	P	P	chr1	RP11-554K11.2	AAGTCAAAGAGGGTCTTTGTGTGAAGGATTCTCCACCTCCTTTTCCCTTTCTACGAAGGA	440	ENST00000417161	Ensembl	+	213719790	213665643	noncoding
ASHG19A3A013211	198.913	237.567	216.267	531.772	403.29	465.722	520.938	7.69516	7.92444	7.83176	9.08365	8.69671	8.89401	8.98338	P	P	P	P	P	P	P	chr2	AC019118.3	AGAATTTAAAGAGGCTGAGTTTTTCATCTCTCTCTGCTGTTTTCTCTCTGGTTTCCCTTT	416	ENST00000419347	Ensembl	-	3149551	3135756	noncoding
ASHG19A3A032016	216.302	234.666	223.21	403.635	314.226	375.34	381.917	7.80318	7.90786	7.87129	8.64865	8.32829	8.56093	8.50776	P	P	P	P	P	P	P	chr6	SIGLECP3	GGCCATCGGGGAGGCAACTGTGAAGATCTCGTTTCTCTGTCTCTGCCTCATCTTCCTCAG	271	ENST00000450059	Ensembl	+	121712027	121711035	noncoding
ASHG19A3A030114	28.9602	72.1043	29.4058	41.0149	34.2418	43.8183	47.7022	5.02032	6.30229	5.09923	5.19262	4.99606	5.34652	5.3656	P	P	P	P	P	P	P	chr6	RP11-406O16.1	ATAGATGATCACTGGGTTGTACCTCTCAAGTACTTTCTCAGAAGCCACATCCATGTTATT	674	ENST00000445346	Ensembl	-	69039791	68936863	noncoding
ASHG19A3A008721	56.833	57.4399	46.6896	61.8151	54.9166	61.3111	55.8491	5.96345	5.99389	5.7354	5.81136	5.71001	5.84604	5.6022	P	P	P	P	P	P	P	chr17	FLJ32065	GCACTATGAGACCAGGAGAAAAATCATCTAAGAAATCGTTCACTCTTGCTAAAAACTGAA	3756	uc002jfb.3	UCSC_knowngene	-	62971703	62962667	noncoding
ASHG19A3A017544	46.5216	49.9507	44.0759	23.1555	28.2767	37.0566	35.4293	5.6833	5.80599	5.65879	4.32776	4.71206	5.09616	4.91432	P	P	P	P	P	P	P	chr1	RP11-63N8.3	TCCTTGCCCAACCCATGGGGGCCTTGCAATGATTAATAATAATAATGATGATGATAATGG	821	ENST00000457706	Ensembl	+	21917680	21912964	noncoding
ASHG19A3A016184	74.7284	119.978	73.1961	45.6926	40.3226	44.6066	45.3707	6.35483	6.99834	6.35704	5.35796	5.24163	5.37565	5.28783	P	P	P	P	P	P	P	chr2	AX747531	CTACTTAAAACCTTAAAACATTACAGATGAAACTAAAGTCTCCTTTGGTGATGTTGTGGG	1221	uc002thh.1	UCSC_knowngene	+	112258585	112257364	noncoding
ASHG19A3A047150	36.8141	48.1014	30.2591	105.982	84.2679	76.1335	121.129	5.3544	5.75774	5.13994	6.61944	6.34665	6.16566	6.76795	P	P	P	P	P	P	P	chr11	AP002856.4	TGGGTGCTCTTTGGCCCTTTTGAATTTTGAACTACAAATGTATTGATTAGCTCTTCACAG	635	ENST00000441665	Ensembl	+	131059648	131056916	noncoding
ASHG19A3A043589	23.0312	22.2255	19.7741	48.0528	50.9684	51.4747	51.8324	4.69536	4.73709	4.55403	5.42945	5.59064	5.58562	5.48793	A	P	P	P	P	P	P	chr10	RP11-428L9.1	AACGATGAAGATGAACAACCTGAACTGGACTCCTGCCAAGTCCACAAACCGATTTTGCAA	366	ENST00000447297	Ensembl	+	8956559	8939951	noncoding
ASHG19A3A022142	47.1499	45.1836	33.4528	108.466	102.412	110.544	114.602	5.70114	5.67415	5.27266	6.65311	6.63671	6.71823	6.67995	P	P	P	P	P	P	P	chr1	RP5-1109J22.3	GAGCCCCTGGCAGGACCAAGACTCAGGGTCCTCATTGTGGGCCTCTGCAGCTTGTGGAAG	354	ENST00000455247	Ensembl	+	46948147	46921494	noncoding
ASHG19A3A032122	81.5198	86.8045	93.4008	56.805	59.6375	44.3468	40.0742	6.47682	6.55366	6.69161	5.68198	5.83676	5.36489	5.1015	P	P	P	P	P	P	P	chr6	RP11-240M16.1	TTCCATGACAGAACAGCTTGCCTGGTACTTGGAGATTCCCATCTTGTTGAGGTAATTTCC	381	ENST00000417800	Ensembl	+	138293659	138266502	noncoding
ASHG19A3A011168	30.483	29.0562	26.6273	39.0545	40.3724	28.2521	35.2711	5.09014	5.08525	4.96259	5.12113	5.2433	4.68751	4.90871	P	P	P	P	P	P	P	chr1	RP11-95P13.1	AAACTACAGCTACTTCAGAGGATAACACTAAACACCTAGTCCACTCTGTATACACTAGAG	451	ENST00000420762	Ensembl	-	219615984	219608493	noncoding
ASHG19A3A035015	18.4994	17.2196	49.1621	31.8824	25.5763	28.6134	30.2406	4.37465	4.42202	5.80793	4.81858	4.55527	4.70721	4.66948	A	P	P	P	P	P	P	chr7	AC000123.4	TTTGATAACCCATTACAACTTTTTCCCTATGGCAACAAGTGCTGAAATCCTTGACTCACA	516	ENST00000418215	Ensembl	+	126991577	126990181	noncoding
ASHG19A3A017019	323.39	365.299	382.447	692.186	567.466	636.513	710.802	8.34878	8.5095	8.62229	9.47829	9.22617	9.36796	9.46377	P	P	P	P	P	P	P	chr2	AC009502.3	AAAGGAGGATCTGCCTGCGTTCCTGACATCACCCTTGGGATTTCTCCTCTGCTCTCCAGG	361	ENST00000442416	Ensembl	+	220602464	220594831	noncoding
ASHG19A3A032345	5	14.3085	5	45.7752	25.9478	39.2464	34.3328	2.37766	4.19214	2.39437	5.36106	4.5769	5.18217	4.86728	A	A	A	P	P	P	P	chr6	RP11-503C24.4	ATGTGCTCTGTGAAGTTCAAACACTGTATCGACCATCTCAACTCTCAGGACAGCATGTGA	2246	ENST00000446811	Ensembl	+	168663261	168643617	noncoding
ASHG19A3A048073	33.9919	19.4205	22.3816	18.8426	20.4621	19.3061	20.9094	5.24655	4.57043	4.71948	4.01197	4.23071	4.10492	4.09463	A	P	P	P	P	P	P	chr1	RP4-665J23.1	AGCTGGTACAAGGAGGTGATGAACAAGGCTAAATGAAAATCATACATAAACTTCCCAATA	808	ENST00000435649	Ensembl	-	91317175	91297081	noncoding
ASHG19A3A019606	63.6009	61.9979	59.7784	111.299	93.0304	104.372	120.086	6.11822	6.09779	6.07434	6.68911	6.4957	6.63432	6.75437	P	P	P	P	P	P	P	chr22	RP3-462D8.2	TTTAGATTTCGGGCTTTACTAAGACTTCCTACACTCAATCTCTGGACTGTAAATGCTGGG	428	ENST00000411511	Ensembl	-	25678258	25675495	noncoding
ASHG19A3A029947	54.092	65.1773	63.8357	100.883	98.8027	96.1573	102.029	5.89569	6.16521	6.16419	6.54437	6.58107	6.51169	6.49938	P	P	P	P	P	P	P	chr6	RP11-344J7.2	TCCACCCCATTCTGGCATGGGAAGCATGTGTGGGCTTCTACTCTATGGGAGATTCATAGC	394	ENST00000451910	Ensembl	-	43820070	43819493	noncoding
ASHG19A3A041187	3259.95	3161.13	2930.09	2163.29	2379.2	2267.94	2554.25	11.5139	11.4738	11.4198	11.1861	11.3529	11.259	11.3701	P	P	P	P	P	P	P	chrX		CCTAACCCTTGGGAGAAGGCAAAACACTTGATGAAATCTACATAAAGACTAAAACATTTT	721	AV714079	RNAdb	+	73167168	73164173	noncoding
ASHG19A3A015038	692.881	582.004	764.117	602.44	564.599	543.221	683.789	9.3657	9.12337	9.5479	9.26784	9.21871	9.13059	9.40325	P	P	P	P	P	P	P	chr2	AC008281.1	TGATTTGATTTGATTTCTACTAGTCAAGTGGGCACCTGGATTAAGCAGACTCTCCCCCAG	613	ENST00000438659	Ensembl	-	220769610	220768771	noncoding
ASHG19A3A018902	400.815	409.267	403.16	813.577	649.832	633.604	769.587	8.6379	8.66587	8.69008	9.73082	9.43728	9.36231	9.57909	P	P	P	P	P	P	P	chr21	C21orf130	GGAAGAAACGCGTATTCCACATTTCCTGTTGATTTTCTTTCCTCCCTAAACACTGACCTC	2019	NR_024100	RefSeq_NR	-	42519991	42513426	noncoding
ASHG19A3A023557	37.8299	39.809	40.9618	81.2843	76.3944	62.3823	83.647	5.39005	5.50484	5.556	6.23141	6.20179	5.87318	6.20684	P	P	P	P	P	P	P	chr1	RP4-771M4.3	GCATCATCCTGGAGCCTCAAGTCTTGTTTGAAATTGAATAAAGGAGAAACATAGGGACGA	447	ENST00000450811	Ensembl	+	63367310	63361679	noncoding
ASHG19A3A038984	33.0109	32.9778	34.1152	66.3756	54.6912	57.0486	67.5313	5.20202	5.25606	5.29824	5.91598	5.70174	5.74033	5.88474	P	P	P	P	P	P	P	chr9	RP11-569G13.2	TCTCCTATCTCAAGCCATCCTTCAACTTATAGGGACTTTGCACATAGTTGCTGCAGGTTG	1577	ENST00000432783	Ensembl	+	98864194	98857492	noncoding
ASHG19A3A020199	123.392	119.231	106.981	134.082	109.253	139.262	276.351	7.04251	6.98965	6.8803	6.96734	6.73457	7.06663	8.02151	P	P	P	P	P	P	P	chr22	AP000343.2	AAACTCAAAAGAAAAACAACTCAGCTCAGGCATCACCTTTCCTGGAAGGCTTCCCTAGTC	346	ENST00000450776	Ensembl	+	23670680	23668802	noncoding
ASHG19A3A027847	36.7153	36.5434	32.8244	67.3127	48.8791	76.9645	54.59	5.35079	5.39178	5.24731	5.93689	5.53037	6.18361	5.56738	P	P	P	P	P	P	P	chr1	RP5-1003J2.4	AGGAAGCACTGTGCTCCCACTGAAGTGACCTGTGAACACCACTCTGCTCTGCAGGCATGT	221	ENST00000412512	Ensembl	+	110825722	110825155	noncoding
ASHG19A3A043518	334.398	343.121	283.254	656.974	538.346	536.318	589.343	8.39752	8.42303	8.20377	9.39826	9.15499	9.11091	9.1745	P	P	P	P	P	P	P	chr10	RP11-118K6.2	ATACAGCACATCATTCTGCCTGCTCCGTGGCTTCTGCTTCTCAAGCGACTTAAAATGATT	608	ENST00000439575	Ensembl	+	3055303	3052722	noncoding
ASHG19A3A032584	55.0459	50.3806	60.7308	79.7997	70.0119	63.1959	76.6454	5.91898	5.81866	6.09842	6.2023	6.07297	5.89537	6.0761	P	P	P	P	P	P	P	chr1	RP11-139I14.2	TGACTTACTCATGTGTACACAACTAGTGAGAATCCAGGTGCTCTGTCCACGATACCAACT	5586	ENST00000451362	Ensembl	+	156365401	156358017	noncoding
ASHG19A3A013185	58.1112	21.0492	20.1905	18.1377	27.9358	18.9167	16.8729	5.99418	4.67028	4.58283	3.95111	4.69271	4.07405	3.75797	A	P	P	P	P	P	P	chr2	AC079779.5	AGAAGAATAATGAAGACTCCACCTGAGGGCTGGAAAAACAAAACCTCAAGTGTGAGGCAG	590	ENST00000416685	Ensembl	-	309379	306058	noncoding
ASHG19A3A039551	737.863	678.062	686.327	385.16	349.662	369.758	356.77	9.4451	9.33495	9.39953	8.57388	8.48683	8.53803	8.39948	P	P	P	P	P	P	P	chrX	RP11-706O15.7	TAGTGCAGGCTGCCATTCAACAAACGCATTGTCAACAGTCAACCAAAAGAAACCCATTGG	2118	ENST00000381105	Ensembl	-	3855896	3847909	noncoding
ASHG19A3A039695	5	7.84205	5	33.6947	32.306	20.9555	20.9283	2.37766	3.51345	2.39437	4.8966	4.91038	4.23258	4.09556	A	A	A	P	P	P	P	chrX	BC024027	ATATTCTGCTTCGTTATTTCGGGCACTCCACAGATTCTGTTGCGAAGGCAGCCATCTTTA	1879	uc004dbt.2	UCSC_knowngene	-	27417114	27193036	noncoding
ASHG19A3A049389	238.679	239.899	241.376	1444.64	1293.99	1314.29	1447.39	7.93563	7.93943	7.97752	10.5992	10.461	10.4639	10.5376	P	P	P	P	P	P	P	chr13	LOC100188949	TATTTTTGAGAGATAGTTGAGTGCAAATGAGTCCTGTTCCTCTTGCATCAGGGCCTGCTC	1589	NR_024464	RefSeq_NR	-	30948036	30914408	noncoding
ASHG19A3A028346	22.1991	25.8539	24.8869	24.3627	19.8441	25.2835	28.8578	4.63579	4.93019	4.86275	4.40477	4.18425	4.51936	4.60013	A	P	P	P	P	P	P	chr1	RP11-389O22.1	ATGCTTCAGACAACTCTCGCAAACTTGTCATAGCTTTTGGTATTCCAGGCCACAGAAGAG	377	ENST00000413231	Ensembl	+	113589677	113550875	noncoding
ASHG19A3A015329	5.65893	8.54704	5	35.0457	24.1362	42.2214	25.9936	2.82683	3.60267	2.39437	4.95772	4.47031	5.29137	4.43693	A	A	A	P	P	P	P	chr2	CR593993	CCACTACACATAGGAAACCACCTGGAAACCCAACCACAGTGTCTGATGTGACTTTTCTTA	1168	uc002rbr.2	UCSC_knowngene	+	11823451	11821585	noncoding
ASHG19A3A013559	5	7.12311	11.5375	77.0176	83.9806	74.21	95.5144	2.37766	3.41139	3.81358	6.14594	6.34169	6.13317	6.40037	A	A	A	P	P	P	P	chr2	AC093609.1	AGATGGCATGTTCCTAAAACAGAGGAAGTAGAACCGAATAAAGCGAAATCCAACTTCCCA	952	ENST00000434020	Ensembl	-	43329829	43324883	noncoding
ASHG19A3A013541	33.026	23.6706	35.0128	51.6117	58.5595	55.6255	51.9398	5.20262	4.81858	5.33458	5.54562	5.80832	5.70284	5.49162	A	P	P	P	P	P	P	chr2	AC009413.3	TAAGGCACAGTTCTGAATCTTTGGTTCTGTAAAGAGGCGTGCCCATCTCTGTGCTTGATT	534	ENST00000418836	Ensembl	-	42105095	42104213	noncoding
ASHG19A3A050823	888.743	848.691	860.213	118.438	110.321	93.6341	106.315	9.69056	9.64631	9.71259	6.77971	6.7492	6.47344	6.56591	P	P	P	P	P	P	P	chr1	BX571672.5	CAAAGAAAGGTTGGGAAAACGTATCCTCAGCAATTTCCCAAGAAACTGAAGAAAGAGCAT	1163	ENST00000439302	Ensembl	-	143272754	143211527	noncoding
ASHG19A3A000234	127.586	136.717	89.9088	220.192	220.219	161.853	215.15	7.08464	7.17786	6.64152	7.71803	7.79246	7.29852	7.63398	P	P	P	P	P	P	P	chr6	RP3-470L22.1	CTGCTGCAGGCCCCAGATGCCACAGGTTGCCTTAAAGAAAAGTTTCTGTATATTAAATAT	388	ENST00000435429	Ensembl	-	6759524	6758510	noncoding
ASHG19A3A029874	90.2975	110.441	93.9904	141.238	132.457	104.757	140.048	6.61256	6.88749	6.70045	7.04597	7.02629	6.64005	6.98459	P	P	P	P	P	P	P	chr6	BC132805	AAGGACTCTGAAGGGGCCAGTTTCTCACACCTTTTAATCATCTTCCATTTCTCCAGGCAA	3122	uc003opf.1	UCSC_knowngene	-	40323745	40312083	noncoding
ASHG19A3A038373	1080.98	1210.98	1098.36	600.97	578.777	598.68	645.038	9.96236	10.1242	10.0397	9.264	9.25784	9.27891	9.31126	P	P	P	P	P	P	P	chr9	RP11-284P20.3	CATCCCAGATCTCTGCATAGCTGTATCTTCCTATCCCTCAAGTTGAAGCATTATCGAAAG	436	ENST00000442260	Ensembl	+	14030114	14025969	noncoding
ASHG19A3A050652	1783.25	1624.09	1444.19	826.772	734.731	716.559	768.201	10.6537	10.5234	10.4126	9.75392	9.62153	9.55619	9.57659	P	P	P	P	P	M	P	chr1	RP11-206L10.8	AATCGGTTAGACTTCTCAAGTGCAATTCAAGATATCCGAAGGTTCAATTATGTGGTCAAA	523	ENST00000447500	Ensembl	-	745541	736258	noncoding
ASHG19A3A020071	15.9201	15.8567	19.7852	16.8986	16.1065	14.3067	16.4449	4.15632	4.31447	4.5547	3.84252	3.85418	3.62838	3.71583	A	A	P	P	P	P	P	chr22	DGCR10	GGAAACTGAAGCATGAACACAACCCCAGACTGGAAATAAAAAGCCGTCATGTACTGTGTG	944	NR_026651	RefSeq_NR	+	19011062	19010136	noncoding
ASHG19A3A030766	17.8273	17.8579	20.4808	32.7212	37.3509	37.8432	49.3523	4.32061	4.46609	4.60031	4.85359	5.12925	5.12641	5.41264	A	P	P	P	P	P	P	chr6	RP1-56L9.7	CCTCTTCTTTCCACATTTGAGTATTTGATCAACCTGGTATTTATTTTGGAAGTATGCATC	741	ENST00000427974	Ensembl	-	160061133	160060338	noncoding
ASHG19A3A029401	7984.34	11105	6565.39	9490.1	10142.7	8519.52	11140.2	12.7716	13.2437	12.5508	13.3676	13.4915	13.1891	13.52	P	P	P	P	P	P	P	chr6	RP1-290I10.3	GACATACAGGAATTATGAAGGATGAAACCATCTCCCCCAGGCCTTCAATAAGTGCAAGTG	539	ENST00000420389	Ensembl	-	10426409	10423372	noncoding
ASHG19A3A037831	7.65363	6.73173	6.08394	33.5547	29.632	21.9037	39.1413	3.1551	3.35324	2.9979	4.89008	4.7819	4.30057	5.06327	A	A	A	P	P	P	P	chr9	RP11-341A22.2	ACTCAGATGTTCTGTGTTTGCCATGAGTATCGGACTTCAGTCTTCTGGAAAGATGGCTGT	588	ENST00000455051	Ensembl	-	106087060	106026892	noncoding
ASHG19A3A019204	35.0529	39.3139	29.4766	28.4801	19.7267	28.3911	34.3003	5.28964	5.48825	5.10288	4.64637	4.17115	4.69491	4.86522	P	P	P	P	P	P	P	chr21	AK025786	GGAGTATTTTATACCTATGTTATAGCCCCATATGTTATACTTTGGATGTCTGTTTACCTG	2525	uc002yug.2	UCSC_knowngene	+	36157166	36118143	noncoding
ASHG19A3A038529	353.151	399.634	407.571	599.115	489.761	542.547	588.447	8.46928	8.63126	8.70466	9.25947	9.00833	9.12896	9.17153	P	P	P	P	P	P	P	chr9	RP11-331F9.3	TCTGGGATTCCCATTCCATTTAGGCCTCCTGATTGCCCCATGTGTCCTTACAATAAACAA	679	ENST00000457044	Ensembl	+	35643514	35642510	noncoding
ASHG19A3A049515	41.8606	60.4694	46.345	49.1179	50.0178	46.6548	56.1519	5.53037	6.06155	5.72737	5.46619	5.56643	5.44165	5.60965	P	P	P	P	P	P	P	chr13	RP11-96M12.1	AAGTTCAGAACAATTCCCCGAGCAACTTTACCTCACAATCTCATTGGAACGGCTGCATCT	2036	ENST00000414562	Ensembl	-	45383766	45373638	noncoding
ASHG19A3A000178	4003.61	3546.73	3248.01	3138.29	3856.72	3912.33	3732.34	11.7996	11.6364	11.566	11.7243	12.0606	12.0502	11.914	P	P	P	P	P	P	P	chr21	AP000475.2	attctgaggcctccccagacatgtggaactAGTGATGCAGAGATGTGACCCAACGGGTCT	482	ENST00000425979	Ensembl	+	23169735	23119292	noncoding
ASHG19A3A000356	107.766	91.9422	92.9331	261.36	223.445	236.613	235.908	6.85776	6.63863	6.68408	7.98618	7.81308	7.87242	7.77735	P	P	P	P	P	P	P	chr18	C18orf20	ATGATCAACCTTCATAGACTGTGCATTATACATGTTGTTGCCACCTTGCTCTCCACTCTC	339	ENST00000454647	Ensembl	-	61765844	61747535	noncoding
ASHG19A3A039372	17.8756	22.9471	14.5425	10.2054	23.4358	14.3893	30.2854	4.32576	4.7763	4.12144	3.05596	4.42626	3.63859	4.67121	A	P	A	P	P	P	A	chr9	AJ011378	TCTCCCTATTAACTATCTATAGTGTAGCTCATTGGAAAAGAGTCATTAATTTTGATTATC	523	uc004ccf.2	UCSC_knowngene	+	135826940	135822455	noncoding
ASHG19A3A050021	9.20522	5.29821	19.2686	16.3946	17.2348	19.554	19.3509	3.40779	2.33387	4.51789	3.7912	3.96051	4.12744	3.97281	A	A	P	P	P	P	P	chr13	RP11-469L23.2	TTTCTAGTCATTTGACTGAGGCTGAACAAAGCCCAGATGGGAGTTTCATTCCCTTCACCT	906	ENST00000414407	Ensembl	+	31384782	31377342	noncoding
ASHG19A3A038605	1270.4	1503.45	1348.7	1893.53	1657.22	1377.8	2188.31	10.1825	10.4174	10.3235	10.9826	10.8236	10.5355	11.1389	P	P	P	P	P	P	P	chr1	RP11-576D8.4	AATCTCTTTCTTCCCTCCTTGTCCGATTCTCTGCTGTAGCTTCCAGTGGAGAAAAATAAT	2885	ENST00000442318	Ensembl	+	205438152	205425056	noncoding
ASHG19A3A020281	25.8756	54.6211	29.216	62.3098	75.3975	55.0786	92.9933	4.86504	5.92437	5.09111	5.8243	6.18276	5.68821	6.36099	P	P	P	P	P	P	P	chr22	RP1-213J1P__B.2	TGATCGATTCTCCCTGAACAGCCTATTACGGAGGCACTGCAGATCAAGCCCGCCTGGAGA	115	ENST00000422833	Ensembl	+	28105929	28103577	noncoding
ASHG19A3A032420	62.4376	105.77	40.3663	326.573	352.928	179.413	347.665	6.09209	6.82652	5.53567	8.32504	8.49918	7.45257	8.36285	P	P	P	P	P	P	P	chr1	RP11-336K24.5	CTTCCTGTCCACTGCCAGAGAGTGGTGCCACAATTCCAAAAATGAAAGGAAAGTAAAAGA	401	ENST00000415726	Ensembl	+	155971578	155961180	noncoding
ASHG19A3A042095	108.856	134.528	118.369	166.04	137.229	139.844	162.25	6.87099	7.15443	7.01683	7.29349	7.07751	7.07337	7.20605	P	P	P	P	P	P	P	chr1		CATGTAGATTAAAACCTTCCGTATGTCCCCAAATCCCCCAGAACAAAAAACCAACAAAAA	2007	AK096133	misc_RNA	+	236133945	236131937	noncoding
ASHG19A3A015349	92.3663	101.952	103.869	173.576	155.717	155.682	171.236	6.64616	6.77828	6.83804	7.35829	7.26912	7.23916	7.28521	P	P	P	P	P	P	P	chr2	AC130710.1	TTTACTTAATGCAGGTTAACTTCATCAACCCTGGTGAAAATGCCACCTCCTCATGAGGAA	1096	ENST00000426539	Ensembl	+	16225923	16190548	noncoding
ASHG19A3A030856	66.6507	68.7643	60.3283	87.4015	78.1043	78.791	86.9361	6.18945	6.23724	6.08798	6.3393	6.23389	6.21621	6.26267	P	P	P	P	P	P	P	chr6	RP1-266L20.2	TTGTACTTTAAATCCGAGAACATTCTCTACTCTCCAGAACAAGTCATCTGCAGGCGCAGG	403	ENST00000413088	Ensembl	-	170125950	170125186	noncoding
ASHG19A3A033876	125.528	130.861	133.142	96.4906	112.518	116.052	117.522	7.06509	7.11867	7.18105	6.48307	6.77945	6.79143	6.71907	P	P	P	P	P	P	P	chr7		TTGAATGGAATCGGGCTCCGTATTGTCCAGATACCTCCCATATTAAAAAAGAACTGGGGC	4665	AK024457	NRED	+	2489932	2485266	noncoding
ASHG19A3A000292	66.6321	52.5816	57.2229	85.0891	87.151	75.803	69.1493	6.18919	5.87508	6.01619	6.29768	6.3936	6.16029	5.9224	P	P	P	P	P	P	P	chrX	XIST	TAGCACTTGAGGATAGCTGAATGAATGTGTCTTACCCATTTCCATGTTTCTCTTGCTAAT	437	ENST00000445814	Ensembl	-	73051045	73047635	noncoding
ASHG19A3A014202	1562.1	1521.13	1559.39	663.52	620.457	651.972	698.611	10.4634	10.4361	10.5237	9.41236	9.36544	9.40592	9.43773	P	P	P	P	P	P	P	chr2	LOC541471	TAGGATAAAGCAACAAGCCTGGACTTTGCTCTACAACAGGGTTTTGCATAGGGAGTGGTA	1583	uc002the.2	UCSC_knowngene	-	112252692	111965358	noncoding
ASHG19A3A043789	202.656	219.877	206.827	382.749	334.491	358.263	368.35	7.71921	7.82103	7.77264	8.56462	8.42615	8.48826	8.44931	P	P	P	P	P	P	P	chr10	RP11-490O24.2	TAAAAGGAGCTCATTTCCTGTAGAGGAACAAACTCCTTTCCTGTCTTCCTGTCTCACTCC	631	ENST00000434552	Ensembl	+	34206732	34198165	noncoding
ASHG19A3A045089	10.5729	11.3164	5	24.1486	22.7462	28.8429	23.3749	3.59917	3.91736	2.39437	4.39076	4.38307	4.71934	4.27386	A	A	A	P	P	P	P	chr1	RP5-1109J22.2	TTCAGGAAACATTCAAGGACCTTCTTCCAAGGGCACAATACTGAGCAACATGGACAAGGT	1129	ENST00000416581	Ensembl	-	46915376	46912344	noncoding
ASHG19A3A008636	63.9612	81.964	68.8346	124.982	101.039	101.886	138.935	6.12663	6.47699	6.26989	6.86621	6.61531	6.59863	6.97413	P	P	P	P	P	P	P	chr1	GS1-122H1.1	CCTTGCATTTATCTTTCTCTCCTACATTGATCTTCACTGGAGAATAAAAATTAGAGACAG	628	ENST00000412174	Ensembl	-	182097800	182096431	noncoding
ASHG19A3A031613	15.3942	19.6821	10.7578	16.5695	18.2568	21.5547	24.5421	4.11299	4.58782	3.71699	3.80908	4.05222	4.27736	4.35322	A	A	A	P	P	P	P	chr6	RP3-417L20.4	TAGGAAACTGAGGCACAGATATGCTCTTGGGTACTTGTCAGCAGCAGTTGTTCTACAAGT	381	ENST00000437859	Ensembl	+	49788155	49785142	noncoding
ASHG19A3A014318	11.7361	9.01016	8.98331	17.1198	17.1106	14.3776	18.1248	3.73617	3.65796	3.47432	3.85897	3.95022	3.63665	3.87315	A	A	A	P	P	P	P	chr2	AC068483.1	CTGGTGAGTTTGTACCACTCAAGAGTCACCCTTAGGCTATGCCAATTTTCTACGCATGAA	660	ENST00000413403	Ensembl	-	129829298	129821418	noncoding
ASHG19A3A032076	43.4025	42.4778	39.6848	136.497	109.341	124.927	136.447	5.58497	5.59327	5.51083	6.9926	6.73632	6.90643	6.94638	P	P	P	P	P	P	P	chr6	AF086187	TATTATTTAACCCACTAGAACCTGTGACTGCATCAGCTTTATATCCTGGACCTCAGCCTG	990	uc003qdd.2	UCSC_knowngene	+	132490502	132455117	noncoding
ASHG19A3A037896	68.8817	68.8053	78.3733	14.6355	10.8973	16.5033	18.9946	6.23744	6.23795	6.44982	3.60896	3.22472	3.86058	3.94239	P	P	P	P	A	P	P	chr9	RP11-202G18.1	ATCTTACCTGTCTGTTATGGAAGAGTGAAGTGGAAAAGGCATGGAGGACTCAGAAGACCT	744	ENST00000426204	Ensembl	-	114047116	113901525	noncoding
ASHG19A3A043974	31.6307	34.9021	27.3299	100.68	125.011	91.4723	141.464	5.13949	5.33028	4.99833	6.54148	6.93913	6.43744	7.00332	P	P	P	P	P	P	P	chr10	RP11-179B15.5	CTGAAAGCTGTTGGACTCATGCTCAAAAGAATCATAGGCAAGTTGTGTTTGTCCCATTAA	328	ENST00000440189	Ensembl	+	60065381	60064312	noncoding
ASHG19A3A014841	13.8392	24.1823	7.0192	96.148	67.2672	71.331	66.626	3.96555	4.84607	3.16281	6.47849	6.01572	6.07992	5.8652	A	A	A	P	P	P	P	chr1	AK124708	CATAACTTTGCTGATCTGGTCTGTGACAAAATAACTTTTTCCTCTGTCAGTCTTTCTCTT	3242	uc001ali.1	UCSC_knowngene	+	4015322	4000676	noncoding
ASHG19A3A031620	71.4362	68.6005	73.1399	109.596	103.644	122.285	110.262	6.2927	6.23412	6.35563	6.66713	6.65571	6.8741	6.62032	P	P	P	P	P	P	P	chr6	DM004406	AAACGGAACCAAGTCCGTCTTCCTGAGAGGTTTGGTCCCCTTCAACCAGCTACAGCAGGG	118	uc010jzo.2	UCSC_knowngene	+	52013838	52013720	noncoding
ASHG19A3A055283	74.5421	148.837	65.4207	86.1576	82.3037	68.2243	97.7672	6.35196	7.2901	6.19631	6.31664	6.3151	6.00809	6.43538	P	P	P	P	P	P	P	chr21	NCRNA00158	AATAAAGAAGAAAACACCCTCAAAGGGAACCCTGAGCAGAACACATGCACAAACTCATGC	1379	uc010glg.2	UCSC_knowngene	-	26804013	26758133	noncoding
ASHG19A3A017654	179.069	41.5077	46.1446	30.6693	27.8832	30.5234	30.1586	7.54823	5.55917	5.72117	4.75717	4.68976	4.80546	4.66543	P	P	P	P	P	P	P	chr20	AX746690	CTGAATATCAGCCCCAGATCTGTAGGAAGTCCACTTGAGTCTTCAGTAAATGCTGATATG	2002	uc002xid.1	UCSC_knowngene	-	37045444	37034659	noncoding
ASHG19A3A043629	11.2381	18.344	11.4296	23.7024	22.1941	24.2596	24.9597	3.67544	4.49972	3.8008	4.364	4.34391	4.45881	4.37996	A	A	A	P	P	P	P	chr10	RP11-214D15.2	TAGCGTGGAGGGGAGAGGGAGAACTGTTTCTTCCGTTCAATAAAGCAAACCCTTCAACAA	380	ENST00000438431	Ensembl	+	13572262	13570515	noncoding
ASHG19A3A030736	172.283	197.84	183.081	440.551	418.194	428.68	482.429	7.49417	7.67902	7.61528	8.78311	8.75587	8.76731	8.86405	P	P	P	P	P	P	P	chr6	RP11-518I13.1	GAAATCTTGAACTTCTACACCCATCCTTGGCTGGCTTTTTCCATGTGAGGCCATATAGAG	533	ENST00000449072	Ensembl	-	156820905	156814359	noncoding
ASHG19A3A045312	6.63074	7.16217	8.9052	19.0235	15.7134	18.9713	21.4595	2.99965	3.419	3.46193	4.02729	3.81601	4.07799	4.14001	A	A	A	P	P	P	P	chr1	SKINTL	ACTGAAGTAACAACCAGCTCTCACAGTGAGTGATTCACATCAGCGTAAAGTCAAGCCAAG	645	ENST00000452503	Ensembl	-	48627543	48567386	noncoding
ASHG19A3A013774	8.558	10.2663	12.5816	35.0873	27.1615	33.6772	31.0091	3.3054	3.80361	3.92774	4.95911	4.64849	4.94972	4.70984	A	A	A	P	P	P	P	chr2	AC078941.1	GTATTAATGGGTAAAGACACCGTGGATATGAAGGAAATCACCTATGGGAGAATATTAAGA	750	ENST00000447453	Ensembl	-	67405124	67351801	noncoding
ASHG19A3A043530	43.0544	41.5998	49.0941	90.802	91.0252	85.9218	105.834	5.57239	5.56207	5.80562	6.39751	6.45888	6.34211	6.55915	P	P	P	P	P	P	P	chr10	RP11-184A2.3	AAGCTAATAATAATAGCCACCACCTGTGGAGAGCTTCTCTTGGACCACGCATTCTGCTAA	758	ENST00000421629	Ensembl	+	3805418	3793258	noncoding
ASHG19A3A000134	23.5038	131.066	19.5223	18.7201	17.8162	25.2628	28.2631	4.7225	7.1219	4.53517	4.00031	4.01487	4.51758	4.56467	P	P	P	P	P	P	P	chr21	AP000472.2	AAGTGTTCATCTCCTTAGAAAACACAGAGTTGTTGTTATGATGAGTCTCCAATGAACCTG	465	ENST00000419467	Ensembl	-	23426688	23413492	noncoding
ASHG19A3A050119	5	10.3398	6.44916	52.7795	44.5486	43.9797	47.7457	2.37766	3.81156	3.06416	5.57716	5.39342	5.35202	5.36717	A	A	A	P	P	P	P	chr13	RP11-65B7.1	AGAAATCTAAAGGTGAAGGAAAGGCAGCGTTCAGCACTGAGCAAGTCCATGTTGGAGAAA	1885	ENST00000439707	Ensembl	+	44604073	44596623	noncoding
ASHG19A3A000363	4190.14	4284.47	2698.88	4158.94	4459.09	3127.86	4716.99	11.8692	11.9174	11.3047	12.1365	12.2642	11.7267	12.2544	P	P	P	P	P	P	P	chr2	AC106875.1	TTCCCCTTCGCCTTCTGCCGTCATTTGACAGGAAATTAGGATGAGCACGAGCAAAGTCGG	1059	ENST00000455754	Ensembl	+	11823449	11821585	noncoding
ASHG19A3A055301	16.8851	27.5124	26.7843	67.0676	51.9722	52.939	64.1629	4.23999	5.01504	4.97039	5.93226	5.62297	5.63083	5.81136	P	A	P	P	P	P	P	chr1	FLJ39609	ATCTTCAGCAGACATTGCCCAGTGCAAGGGGAGTCCAGCCCCAGACTGACTTTCTGAGGT	436	uc010nxz.1	UCSC_knowngene	-	854817	852952	noncoding
ASHG19A3A042337	159.81	182.859	166.609	305.559	271.361	273.001	331.579	7.39199	7.57014	7.47953	8.22056	8.12021	8.09451	8.29431	P	P	P	P	P	P	P	chr10	RP11-631M21.1	ATTCAGAAATAACAACAACAAAACCAGAGCACCCCGATGCATTTAGGCCTCAAGGAATTC	347	ENST00000449585	Ensembl	-	60544	60000	noncoding
ASHG19A3A042428	47.3561	36.0349	42.0384	20.0549	28.3486	21.043	25.9701	5.70773	5.37306	5.59097	4.1076	4.71674	4.23949	4.43542	P	P	P	P	P	P	P	chr10	RP5-1051H14.2	TGGGGAACTTTGGTGGGTGCTTGATAATGGGGACTGGAATAAAAACTGGCTAAGCAAAAA	344	ENST00000419836	Ensembl	-	9801200	9800745	noncoding
ASHG19A3A049542	6.5396	10.9343	16.3822	25.5539	63.079	31.3029	32.6738	2.9838	3.87409	4.29362	4.4807	5.92143	4.84195	4.79094	A	A	A	P	P	P	P	chr13	RP11-279N8.2	TCATGAAAACAATTGCAGTGATGAGAACCAGTTACTAATGGCATACATCACACATTTCAG	215	ENST00000435617	Ensembl	-	48481492	48479463	noncoding
ASHG19A3A039153	11.9181	14.4694	11.1896	44.9033	23.5713	26.6667	46.0684	3.75667	4.20723	3.77457	5.3334	4.43376	4.60052	5.30987	A	A	A	P	P	P	P	chr9	RP11-787B4.2	CTCCTAGTGCCTGCAGCCACGCAATACATATTTGAAAAGTAAGTGGAAATCTGTCAAGTG	509	ENST00000416507	Ensembl	+	118775244	118774639	noncoding
ASHG19A3A014458	21.6168	24.9624	26.0396	30.8216	34.743	33.6209	27.0399	4.59632	4.88643	4.93119	4.76436	5.01983	4.94621	4.49398	A	M	P	P	P	P	P	chr2	AC079163.1	TTTGACCACTTTCTCACACCTAAAGCTGTTTAATAGGAGCAGCACTTTCAACTATCAGAG	407	ENST00000418416	Ensembl	-	146360991	146358474	noncoding
ASHG19A3A017368	38.4763	52.6087	35.8002	80.8998	73.1249	79.6273	86.7248	5.41387	5.87603	5.36878	6.22377	6.13341	6.23103	6.25925	P	P	P	P	P	P	P	chr20	RP5-1069C8.2	TGTAAAAATTTAAGTGCATCTGAAGGCTCTCCAGCTTGAAACCCTGCAGAGCGGGATGAA	3033	ENST00000456265	Ensembl	-	12933167	12845849	noncoding
ASHG19A3A051485	22.7378	16.6824	17.3834	26.1668	34.5946	29.4641	42.8322	4.67504	4.38114	4.36946	4.51721	5.01374	4.75121	5.20374	A	P	A	P	P	P	P	chr14	AK128037	ACATCAGAATATTGCATCTCCTACTGCACAAATATACCAGAGCAACCAAGATAAGAGAAG	4915	uc001xep.1	UCSC_knowngene	+	60530277	60386430	noncoding
ASHG19A3A030480	8.44361	166.83	8.45378	19.1932	22.2908	20.7514	22.2384	3.28275	7.4447	3.39161	4.0402	4.35095	4.21837	4.1943	P	A	A	P	P	P	P	chr6	RP11-735G4.1	AACTTCTTCATTCCTGAGGGAGGACTTATGATTTCATGAGAAATGCCCTAGGAAAGGGGC	821	ENST00000422227	Ensembl	-	125695470	125691356	noncoding
ASHG19A3A017652	154.79	170.226	164.475	29.8911	23.9948	31.6873	32.0722	7.34848	7.47312	7.46215	4.71827	4.46119	4.86025	4.76326	P	P	P	P	P	P	P	chr20		CTTACCGTGTAATTGAATGGTGGCATTATAACGCTATTTTTCAGGAGGCTTGTGAAAAAA	2133	AK024410	NRED	-	37041070	37038939	noncoding
ASHG19A3A044662	32.0518	28.0475	38.652	60.7682	63.3071	59.0054	68.1831	5.15892	5.03973	5.47646	5.78566	5.92605	5.78854	5.90035	P	P	P	P	P	P	P	chr10	RP11-500G10.5	TCTTATCCCAGAATCAAAGGCTCCTGGTGGGTAGGAGCGTGTCCCATGTGCAGCACGCTT	552	ENST00000440388	Ensembl	+	131985130	131984444	noncoding
ASHG19A3A013409	80.7952	67.9101	140.405	95.0712	100.949	99.1346	105.198	6.46655	6.22026	7.25233	6.46237	6.61409	6.55768	6.54806	P	P	P	P	P	P	P	chr2	AC013472.6	TTTTTTCCACAACCTTTTGTTCACCGGGTTTTTAACAACAGAAATAAACCTAACCCCCAA	407	ENST00000444217	Ensembl	-	27273132	27272550	noncoding
ASHG19A3A020203	113.141	120.371	113.587	119.873	110.483	129.651	119.248	6.92316	7.00183	6.96061	6.79887	6.75138	6.95993	6.74364	P	P	P	P	P	P	P	chr22	AP000345.4	TTCATCGAAGCAAAGCATCTCCTGCCACCAAGCACGTCCACGGTATTGGGGATTGATTGC	477	ENST00000432249	Ensembl	+	23855789	23854680	noncoding
ASHG19A3A013186	18.311	24.4779	9.58275	18.7869	18.0798	20.9413	29.1821	4.35943	4.86012	3.5633	4.00706	4.03581	4.23127	4.61697	A	A	A	P	P	P	P	chr2	AC093326.1	CTGGCCATATTAACTCCTGCACAATACTAAGAAAAATAAATTGCACTAGCTGTGGAATAA	510	ENST00000427398	Ensembl	-	492655	490943	noncoding
ASHG19A3A043277	6.61185	5.56249	10.8137	27.515	87.8475	24.0548	30.5419	2.99598	2.65718	3.72433	4.59518	6.40683	4.44799	4.68483	A	A	A	P	P	P	P	chr10	RP11-56I23.1	GAATGACTCAGATCATCCTCTTGGGCAGCCCTTTTTGGATATCTCTATGAAATTCTGCAG	456	ENST00000447757	Ensembl	-	107578955	107568532	noncoding
ASHG19A3A017211	35.0507	48.3225	40.5402	81.2724	83.0413	70.8622	87.3728	5.28954	5.76245	5.54133	6.23112	6.32816	6.06888	6.26943	P	P	P	P	P	P	P	chr2	AC110299.2	TTTAACTCACGGAGGTTGGTTGCTCCAGGTTCCCTAGTAGAGTAGAGCTAAAATCCAAGT	822	ENST00000416835	Ensembl	+	242459662	242458386	noncoding
ASHG19A3A017334	2647.95	3487.39	1544.54	5344.4	5458.72	4325.8	7743.83	11.2125	11.6127	10.5099	12.5143	12.5799	12.2007	12.9835	P	P	P	P	M	P	P	chr20	RP5-859D4.3	TTCTTCCTCCCTTCTATTTGGCCTTGGAATACCCTGCAGACAAAGATGGACTTCCTTTAG	932	ENST00000445589	Ensembl	-	6716783	6711904	noncoding
ASHG19A3A042353	71.6848	98.5598	69.709	251.491	188.295	197.433	193.622	6.29737	6.73431	6.28557	7.92634	7.55463	7.59288	7.47624	P	P	P	P	P	P	P	chr10	RP11-69C17.1	GGACTGACCGCTTCCTGTCTGGACACCAGTCCTGTAATGCTCTCATCCTTGCTGTCTGAG	777	ENST00000438372	Ensembl	-	2056542	2054458	noncoding
ASHG19A3A030993	1085.99	1053.82	820.684	1828.39	1654.39	1419.55	1950.19	9.96995	9.92325	9.64557	10.9277	10.822	10.5758	10.9672	P	P	P	P	P	P	P	chr6	RP11-456H18.2	TTCAAGTTATTTCCCTCCTCTAGAATGCTGTACTTCCACCACTGCCAAATCGTGAACTTT	784	ENST00000437559	Ensembl	+	12009089	12007902	noncoding
ASHG19A3A015342	9.08241	19.3215	9.44527	115.495	98.2861	102.686	112.955	3.38947	4.56477	3.54247	6.74025	6.57344	6.61102	6.65646	A	A	A	P	P	P	P	chr2	AC008278.2	ACTTCATCTGATACAAGCATGCTTGAAACAAGAGACACCTGTATGATTCCATCTTCCCAG	409	ENST00000438178	Ensembl	+	15713992	15704293	noncoding
ASHG19A3A049946	17.8429	12.2376	18.4507	11.4979	22.2715	19.6633	20.3509	4.32251	4.00747	4.45457	3.22785	4.34868	4.13636	4.05175	A	P	P	P	P	P	A	chr13		TGATTGTTAAGATAGGATCATGAAAGAAGACAGAAGACGGATGTGAGTGGCCCTCAGAAA	1308	AY927579	RNAdb	+	24044781	24040709	noncoding
ASHG19A3A045898	570.212	606.18	568.889	579.067	585.236	568.605	626.533	9.0968	9.18159	9.13803	9.20761	9.27679	9.20233	9.26709	P	P	P	P	P	P	P	chr1	LOC115110	ACAAAAATGCCAGGTGATCAAAGCGGTCACAGCACAATGTCCACATCCAACGAGAAATTG	2216	NR_026927	RefSeq_NR	-	2484284	2481358	noncoding
ASHG19A3A046347	5.39646	13.2803	10.1552	35.7764	28.2603	21.0216	46.8409	2.77944	4.10304	3.6377	4.98792	4.71102	4.2374	5.33738	A	A	A	P	P	P	P	chr1	BC048114	TACAGAACTAAGTAAATCACCTTCTGCTGTCATCAGAGAAGGCTCAATGCAGGGGCATCA	1815	uc001cyn.2	UCSC_knowngene	-	57292593	57289360	noncoding
ASHG19A3A031686	15.7514	31.8274	25.6313	27.4546	22.7406	23.9918	26.6643	4.14178	5.20676	4.90672	4.59182	4.38263	4.44422	4.47502	P	A	P	P	P	P	P	chr6	RP11-542F9.1	CCGTAAATTACAAGATTTTCCAGTTTGACCACTGGCGCTTAACCTAACTACATACTGAAG	492	ENST00000449928	Ensembl	+	68770394	68765242	noncoding
ASHG19A3A009138	60.9507	17.0489	66.2338	21.9809	26.1896	24.8686	31.9417	6.05581	4.40997	6.21329	4.24599	4.59078	4.49563	4.75566	A	P	P	P	P	P	P	chr17	AC005224.2	TCCATCAATGATGAAAGGAATGAATGAGTACCTTTTATGGCATGGTGGGAGGTGGAGGTG	1537	ENST00000458492	Ensembl	+	14121239	14113804	noncoding
ASHG19A3A000184	5	5.627	5	34.3142	36.2981	27.0122	39.0347	2.37766	2.75509	2.39437	4.92478	5.08422	4.62151	5.0602	A	A	A	P	P	P	P	chr1	RP11-14O19.2	CCTATCATGGGACTTACCTAGTGATCATGAATGCTGTGACCTCTGAGATAATTCACCCAC	1013	ENST00000426881	Ensembl	-	95846556	95821574	noncoding
ASHG19A3A017322	8.45022	8.85621	15.6616	54.1164	39.192	45.3105	52.559	3.28395	3.63822	4.23032	5.61228	5.20055	5.39778	5.51145	A	A	A	P	P	P	P	chr20	RP5-1022P6.6	TCTAGACTGAGCTGTCTCGGTCACTCAGGAGGCAGTTGGCAGAGTATTCGTGGTCAGGGA	1857	ENST00000379053	Ensembl	-	5485259	5480968	noncoding
ASHG19A3A013285	9.50447	24.8926	22.8157	45.3723	34.8619	35.9882	38.3809	3.45178	4.88259	4.74178	5.34797	5.02525	5.05227	5.03525	A	A	P	P	P	P	P	chr1	LOC731275	ATCTGTGGACAGGGGCCACGCTCCTGGGCTTCCAAAGTTGGAGAAAGCTGCCAGGCTCAG	3834	NR_029401	RefSeq_NR	-	243265046	243219615	noncoding
ASHG19A3A031641	5	5.2483	5	64.5984	65.5145	67.7368	67.2106	2.37766	2.33192	2.39437	5.87706	5.97402	5.99843	5.8789	A	A	A	P	P	P	P	chr6	RP11-345L23.1	AAACTTACTGGAAGGATGTGAGGACATGTTCGGGAATCTATTTGCAGAAAACATATTCAG	566	ENST00000448327	Ensembl	+	53496192	53493177	noncoding
ASHG19A3A039401	7112.46	7499.34	7244.82	16976.4	15688.4	16446.7	17510	12.6012	12.6925	12.6896	14.2267	14.1417	14.171	14.1758	P	P	P	P	P	P	P	chr9	NCRNA00094	TCTCCTTGGCTACACAAATGTGCAGGTGTCTCTTGTCAAAGCTAATTTTTCTTTTCTAAA	2239	ENST00000430633	Ensembl	+	136893224	136890560	noncoding
ASHG19A3A029338	49.3351	52.4876	39.5792	96.5213	67.5164	81.427	86.2282	5.76746	5.87294	5.50662	6.48388	6.0214	6.2637	6.25008	P	P	P	P	P	P	P	chr6	RP1-223B1.1	TTGCTACATCTCACTATGGGTTTCCTGTGACATTTTGAGCAAGTATGCCTCTGTGACTGG	789	ENST00000443445	Ensembl	-	3624981	3594480	noncoding
ASHG19A3A031614	5	6.26861	5	20.2211	19.1089	16.0482	23.3091	2.37766	3.27373	2.39437	4.12144	4.12842	3.81466	4.2708	A	A	A	P	P	P	P	chr6	RP11-397G17.1	GACTCCAGATTTCAGACTACATAGCCTGGCAGTTTTCTACAAGAACCAACTTTTTTGCAG	692	ENST00000415106	Ensembl	+	50066995	50061423	noncoding
ASHG19A3A042136	93.9703	106.895	100.392	160.921	150.145	175.699	186.682	6.67326	6.84203	6.79094	7.24491	7.2132	7.41871	7.41775	P	P	P	P	P	P	P	chr1	RP4-656G21.1	GCTAGGCACAGACTCCATCTGCCTCTGCCAGGGAGTTTATTAAATAGTTTATTAAATCTC	498	ENST00000422638	Ensembl	-	30182394	30181697	noncoding
ASHG19A3A029687	17.7552	12.2791	11.5809	58.7413	51.1357	61.0689	71.7533	4.31597	4.01099	3.81876	5.73445	5.5959	5.84033	5.97374	A	P	A	P	P	P	P	chr6	PSORS1C3	CAGTGCTCTGTGAAGGGTCTTGACATTGCACTGTAATAATAAAGGTGTGTGTGAAGTATC	600	NR_026816	RefSeq_NR	-	31145676	31141511	noncoding
ASHG19A3A041497	5.48262	5.24992	14.3158	22.6073	22.65	24.8735	23.9044	2.79333	2.33198	4.10235	4.28946	4.37708	4.49634	4.30977	A	A	A	P	P	P	P	chrX	RP11-13E5.2	GAGCATGGGAACTATGTCTTATTATCTTTTTTATGCTCAATCCCTATCAGAAGTTGTGTA	639	ENST00000438994	Ensembl	+	125249545	125243744	noncoding
ASHG19A3A019374	21.4549	11.2206	15.2933	35.8061	29.2052	38.2991	39.5572	4.58561	3.90713	4.19999	4.98939	4.76178	5.14488	5.07944	A	P	A	P	P	P	P	chr21	AL133492.3	TTCATGATGGTGGGATGATGACGTAGTTTACGATATTTTGCAGTTACACCCAGTGCAGTG	749	ENST00000423045	Ensembl	+	47172900	47170541	noncoding
ASHG19A3A010367	74.6252	50.9615	44.8074	67.4627	68.2084	55.4472	75.6854	6.35357	5.83554	5.68158	5.93967	6.03644	5.69885	6.05817	P	P	P	P	P	P	P	chr18	C18orf20	TTAATTTCTCCCTAGTGCTACTTCTCAGATTGGCCAGTGACTCACAGAGTGGCACAAGTA	885	NR_027245	RefSeq_NR	-	61816260	61747242	noncoding
ASHG19A3A018259	1219.82	1198.68	1151.59	2241.76	2245.93	2278.41	2415.45	10.1196	10.11	10.1074	11.2344	11.2681	11.2647	11.2885	P	P	P	P	P	P	P	chr20	RP3-477O4.15	AAGCAAGAGCTTTTTGGTTCCTCTTGAGGATAGAATCTATAGGAAAATGTAAGAGGGTTA	3965	ENST00000466530	Ensembl	+	34105360	34101395	noncoding
ASHG19A3A050322	23.3243	39.1618	17.0618	35.0144	29.5642	33.7951	26.3736	4.71446	5.48269	4.34751	4.9568	4.77837	4.95378	4.4577	P	P	A	P	P	P	P	chr13	RP11-408O13.2	TCAAAGGGCAAAGGGTGAGACCCTTCCACCGGTCCAGCTGGACTCTAGCCTCAGGGACGT	518	ENST00000420956	Ensembl	+	78237275	78236634	noncoding
ASHG19A3A019208	164.028	204.096	166.714	2591.4	2472.65	2514.98	2525.53	7.43152	7.72183	7.48044	11.4406	11.4084	11.4125	11.3519	P	P	P	P	P	P	P	chr21	AP000688.8	TTCAAAAGCAAAAGTCCCCTACCAGCCAGTGAAGCTACCTGATTTCTCAGTATCTTACGC	811	ENST00000457157	Ensembl	+	37379899	37377635	noncoding
ASHG19A3A015673	46.2295	44.068	51.3146	125.566	122.48	115.323	120.274	5.67483	5.6376	5.86499	6.8732	6.90698	6.78189	6.75563	P	P	P	P	P	P	P	chr2	BC043355	AGCCGTCAAAACATGAGAGCCCTCTTTCTAATCATCTCACTTCTTGGAAAAAATAGAATG	1275	uc002rzk.2	UCSC_knowngene	+	56408787	56179292	noncoding
ASHG19A3A038771	79.5866	82.0481	87.2903	206.703	182.068	172.599	184.292	6.44795	6.47782	6.60453	7.62113	7.50257	7.39305	7.39845	P	P	P	P	P	P	P	chr9	RP11-63P12.7	GTTTCTGTCACTGCAAATCAAAGAGCCCAGCCTAAAATCCTCTGTAGCCTTCTTATTTCC	361	ENST00000427901	Ensembl	+	74872699	74872251	noncoding
ASHG19A3A026303	47.8596	63.4859	58.6316	98.2122	61.9576	74.3406	96.3003	5.72215	6.1291	6.04951	6.50667	5.89473	6.13652	6.41224	P	P	P	P	P	P	P	chr1	RP11-147C23.1	TTTGCTCATCTGCTTCTCCAAGTCATCTTTAGTGTGGAGACCTGAACTCATGGAATCATG	479	ENST00000442558	Ensembl	+	96488422	96403456	noncoding
ASHG19A3A037148	78.5203	96.4195	93.1931	141.869	126.626	125.895	160.974	6.42898	6.70574	6.68901	7.05283	6.95964	6.91825	7.19398	P	P	P	P	P	P	P	chr9	RP11-570H19.2	ATGTGCAACTGCCCCACTTTGAAGAGTGTTAATGTCTCTGTTCCCATAACCAGTAACAGC	237	ENST00000443359	Ensembl	-	18362218	18360594	noncoding
ASHG19A3A013625	43.4344	71.541	57.6296	205.429	139.116	168.402	189.556	5.58587	6.29314	6.02527	7.6127	7.10126	7.35424	7.43944	P	P	P	P	P	P	P	chr2	AC139712.4	TTTGGCTGACTACCAAATTTTAATCTCTGTGTTTGTTTTCCGCCCTTTGGCCCACTTTCT	639	ENST00000443926	Ensembl	-	52727890	52721825	noncoding
ASHG19A3A043091	454.556	509.089	482.496	479.358	402.827	402.381	480.297	8.81	8.94795	8.91729	8.92264	8.6944	8.67093	8.85551	P	P	P	P	P	P	P	chr10	FLJ37201	GCTGTTATTAGCCTGATGAATGTGAATTGATTCCTGTGGCCTTGTCTTCTTTGTTTTGTT	3662	NR_026835	RefSeq_NR	-	91457685	91451056	noncoding
ASHG19A3A018307	22.5784	19.9866	24.2158	26.92	45.1191	40.3616	40.4485	4.66362	4.60484	4.82475	4.56304	5.41433	5.22135	5.11766	A	P	P	P	P	P	P	chr20	RP5-1031J8.1	ATTTGACAGGAAAGGGAGAAAAGAGAGAACGAGGCATAAATCTCTGGCCTTCTGCCTCTT	480	ENST00000444436	Ensembl	+	38441871	38414362	noncoding
ASHG19A3A017522	279.055	308.117	282.154	92.6169	95.6302	85.1871	96.4407	8.13587	8.27047	8.19849	6.4246	6.53661	6.32939	6.41386	P	P	P	P	P	P	P	chr20	BC036544	TCTGCCTCCGACCGGTCGTGTGTGGGTTTACTCGGAGGTGCTTTGCCTCTGAAGAAAAGA	1212	uc002wvk.2	UCSC_knowngene	-	26189869	26167655	noncoding
ASHG19A3A044216	13.6504	5.90839	15.1405	21.395	26.6845	26.7301	29.3225	3.94689	3.11568	4.18562	4.20409	4.62007	4.60407	4.626	A	A	A	P	P	P	P	chr10	RP11-475D12.2	ATGGCTGGGAAAGGCCACTTGTTTTTCTTCAGTTAATGCTGAGACTGTTTGTCTGCCAGA	500	ENST00000435367	Ensembl	+	87204685	87192618	noncoding
ASHG19A3A026106	68.5925	69.4634	65.0227	84.155	77.8216	123.6	110.622	6.23015	6.25253	6.18894	6.28178	6.22952	6.88974	6.62564	M	M	M	P	P	M	M	chr1	RP11-148B18.1	TTTTTGTACCCTCCTGCAGGGAGCAGGTTCTCTGTCCTTGTTTAATTAGACATTTCTCAG	212	ENST00000413103	Ensembl	+	94715048	94713463	noncoding
ASHG19A3A031342	10.3074	21.0544	18.7493	147.038	124.549	115.439	148.533	3.5653	4.67054	4.47695	7.10636	6.93447	6.78317	7.07788	A	A	P	P	P	P	P	chr6	XXbac-BPG254F23.7	GGAGTCTTCTTATGCATCTGTTTTCCCTAGAGCATTCAATTCAAGCTCATGAAATATCAG	381	ENST00000448198	Ensembl	+	32686604	32685781	noncoding
ASHG19A3A038876	1235.01	1484.97	1359.56	1735.36	1506.96	1362.14	1655.34	10.1344	10.3968	10.3358	10.8552	10.687	10.516	10.7343	P	P	P	P	P	P	P	chr9	RP11-276H19.1	ATCAACTCCATCTGTCACAAAAATTAAGGCTAAATCTCCTCTCCAGAAGCAGAGGGAGCC	4387	ENST00000415801	Ensembl	+	89616948	89563613	noncoding
ASHG19A3A026125	185.889	213.236	171.86	408.568	322.205	376.258	421.09	7.60087	7.77972	7.52476	8.66619	8.36888	8.56544	8.65273	P	P	P	P	P	P	P	chr1	RP11-148B18.3	GTTTGATGTCCTTCTTCTGTTCCCTATTCTAGGTCTGGGCTTGATGTTCACCGATTTTCC	480	ENST00000418242	Ensembl	+	94800404	94798822	noncoding
ASHG19A3A019612	39.3536	84.0619	44.9062	202.772	171.886	164.669	185.715	5.44522	6.50976	5.68451	7.59446	7.41911	7.3232	7.40984	P	P	P	P	P	P	P	chr1	RP4-811H24.8	CAGTGAAAAGCCAAAAGTAAAACCTAGGCTTTCTACAACTCTGCCTGCTCCTACAAAAGG	267	ENST00000421153	Ensembl	+	32819143	32817121	noncoding
ASHG19A3A016298	5	6.45501	10.3364	47.9051	44.816	38.3257	40.017	2.37766	3.30738	3.66511	5.42631	5.40259	5.1458	5.09845	A	A	A	P	P	P	P	chr2	AC018737.3	TTGACTCTGAGCAGTTTCTGTGCAGCCACAAAGATTCTTATGTGAGACACACTGCTGCTT	794	ENST00000438722	Ensembl	+	122554278	122548019	noncoding
ASHG19A3A014280	89.8718	97.7233	72.4869	89.5256	91.7476	89.4197	96.9152	6.60698	6.72328	6.34097	6.37544	6.47149	6.40313	6.42225	P	P	P	P	P	P	P	chr2	AC073409.1	GTGTAGAAAAAACAAGAAAATTGTGTACCTAACTCTCCATGGTAACCTCTCTCACTTTTT	269	ENST00000451749	Ensembl	-	124202021	124200841	noncoding
ASHG19A3A033552	10.6129	11.5677	48.0635	31.6045	32.1543	27.5664	38.9641	3.60441	3.94339	5.77644	4.80507	4.90368	4.64863	5.05811	A	A	P	P	P	P	P	chr7	AK095549	TGGAGACTTATTTTCAGGAAACTAGCCTCTTGCTTTATGTGAAAACAAGGACCCAACTCA	2227	uc003vqn.3	UCSC_knowngene	-	130598069	130565751	noncoding
ASHG19A3A037793	90.0567	91.3311	95.5921	213.444	184.035	180.654	201.024	6.60907	6.62977	6.72581	7.66971	7.52033	7.46281	7.53436	P	P	P	P	P	P	P	chr9	RP11-23B15.1	ATGTTCCCTGTCTTGGGAGCCTTTCTTCAGGGAGCTTGATGGTTCCAACCCACCCAGGAG	204	ENST00000430058	Ensembl	-	100572290	100568216	noncoding
ASHG19A3A017417	33.7803	36.5258	46.9213	38.3441	65.1535	35.4303	37.1684	5.23618	5.39119	5.74184	5.09252	5.96588	5.02662	4.98752	P	P	P	P	P	P	P	chr20	HSPC072	GACCTTTAGCTATTCTGGAGGAACATGTCACTTTCACTTATTTTCTTTCATGTTTTCCCA	1397	NR_026884	RefSeq_NR	-	18774626	18768614	noncoding
ASHG19A3A040075	5	5.39548	5	72.5625	75.2408	56.7217	87.3095	2.37766	2.35783	2.39437	6.05085	6.1795	5.73318	6.26854	A	A	A	P	P	P	P	chrX		GGGATGGGGAATGGATTATTGGAAAATGGAAAGAAGAAAGTAACTAAAAGCCTTCCTTTC	2659	AK054860	NRED	-	73043154	73040494	noncoding
ASHG19A3A028681	21.348	21.0256	87.9688	31.3978	38.798	33.9969	53.7014	4.57855	4.66845	6.61482	4.79452	5.18659	4.96471	5.54404	A	P	P	P	P	P	P	chr1	BC043254	ATCGCTTCTTCCTTTAAGGAGTATTAGAACACTGCTGGGGATGGGCTGACAAACATACCA	1395	uc001efz.2	UCSC_knowngene	+	116468528	116461996	noncoding
[truncated: 169 more rows]
