# Supplementary material for: Long Noncoding RNA Expression Signatures of Metastatic Nasopharyngeal Carcinoma and Their Prognostic Value
Source: Biomed Res Int. 2015 Sep 13;2015:618924. doi: 10.1155/2015/618924 (PMC4584063; doi:10.1155/2015/618924)
Supplement: Supplementary file 1 — Table S01. The clinical information corresponding to the seven NPC patient samples used for microarray analysis. Table S02. Four different lncRNA members (LOC84740, ENST00000498296, AL359062, and ENST00000438550) were selected to verify their expression levels via QPCR. This table supply the primer sequences used for Real-time PCR of the four lncRNAs. Table S03. lncRNA Expression Profiling Data. A total of 33,045 lncRNA probes were used in our lncRNA microarray. Up to 30,610 lncRNAs were detected in all seven samples. Table S04. Differentially Expressed lncRNAs. A total of 8,088 lncRNAs were identified to be significantly differentially expressed(≥2-fold) between the metastatic and primary NPC tumors in the microarray. Among these, 3,778 lncRNAs were found to be consistently upregulated; 4,310 lncRNAs were downregulated. Table S05. HOX cluster profiling. In this study, we detected the transcripts in HOX loci, 477 transcribed regions were found. Among them, 257 were ncRNAs and 220 were HOX coding transcripts. Table S06. Differentially expressed IncRNAs at HOX locus. In the four randomly paired groups, the number of differentially expressed lncRNAs differed, but several lncRNAs displayed similar changes in expression. Compared with the NPC primary tumors, 70 lncRNAs were found to be differentially expressed in metastatic tissues; 51 coding transcripts were differentially expressed. Table S07. Rinn lincRNA expression profiles. A total of 4,199 Rinn lincRNAs were detected in this microarray analysis. Table S08. Differentially expressed Rinn lincRNAs. A total of 1,069 Rinn lincRNAs were found to be differentially expressed. Table S09. Enhancer lncRNAs profiles. A total of 1,598 enhancer lncRNAs were detected, of which 468 lncRNAs were differentially expressed. Table S10. Data for enhancer lncRNAs regulating a nearby coding gene. The differentially expressed enhancer lncRNAs and their nearby coding genes (distance < 300 kb) were presented. Table S11. Data for lincRNAs reg [file 618924.f1.zip › S10 Data for enhancer lncRNAs regulating a nearby coding gene.xls]

## Sheet: M vs T
# Condition pairs: M vs T # Fold Change cut-off: 2.0 # P-value cut-off: 0.05 This table contains the differentially expressed enhancer-like LncRNAs and their nearby coding genes (distance < 300 kb). # Column A: seqname, the sequence identifier. # Column B: GeneSymbol, the symbol of the LncRNA. # Column C: P-value - LncRNAs, it is calculated by t-test. # Column D: Fold change - LncRNAs, the ratio …
seqname	GeneSymbol	P-value - LncRNAs	Fold change - LncRNAs	Regulation - LncRNAs	source	RNAlength	Chrom	Strand	txStart	txEnd	GenomeRelationship	NearbyGene	NearbyGeneSymbol	NearbyProteinName	P-value - mRNAs	Fold change - mRNAs	Regulation - mRNAs	NearbyGeneChrom	NearbyGeneStrand	NearbyGenetxStart	NearbyGenetxEnd
uc002khh.2	LOC388312	2.82e-05	2.57153	up	UCSC_knowngene	4812	chr1	-	661139	679736	downstream	NM_001005221	OR4F29	olfactory receptor 4F3/4F16/4F29	0.0237	2.73578	down	chr1	+	367658	368597
uc002khh.2	LOC388312	2.82e-05	2.57153	up	UCSC_knowngene	4812	chr1	-	661139	679736	upstream	NM_198576	AGRN	agrin precursor	5.09e-05	2.58116	up	chr1	+	955502	991492
NR_026790	HCG11	0.000143	2.22629	up	RefSeq_NR	5688	chr6	+	26521933	26527610	upstream	NM_003532	HIST1H3E	histone H3.1	9.8e-05	4.33728	up	chr6	+	26225382	26225844
NR_026790	HCG11	0.000143	2.22629	up	RefSeq_NR	5688	chr6	+	26521933	26527610	upstream	NM_003524	HIST1H2BH	histone H2B type 1-H	1.63e-06	7.88742	up	chr6	+	26251878	26252303
ENST00000434868	RP1-90L6.2	0.000205003	11.5304	down	Ensembl	6043	chr22	+	27254596	27261749	upstream	NM_001886	CRYBA4	beta-crystallin A4	0.00314572	4.05431	down	chr22	+	27017927	27026636
ENST00000450248	TUG1	6.12e-05	3.41477	up	Ensembl	6477	chr22	+	31365642	31374831	downstream	NM_134269	SMTN	smoothelin isoform b	0.00112	3.37564	up	chr22	+	31477304	31500609
ENST00000450248	TUG1	6.12e-05	3.41477	up	Ensembl	6477	chr22	+	31365642	31374831	downstream	NM_134270	SMTN	smoothelin isoform a	0.00246	2.71942	up	chr22	+	31477304	31500609
uc003ojj.2	CR624291	6.96358e-05	2.06263	down	UCSC_knowngene	2513	chr6	-	34247456	34249969	upstream	NM_012391	SPDEF	SAM pointed domain-containing Ets transcription	0.0013769	3.98804	down	chr6	-	34505579	34524091
AB073661		0.000154	2.11741	up	NRED	2686	chr22	+	31371385	31374065	downstream	NM_001002837	INPP5J	phosphatidylinositol 4,5-bisphosphate	8.89e-05	2.44041	up	chr22	+	31518960	31530683
ENST00000433673	AC068282.3	1.88e-05	9.05125	up	Ensembl	2690	chr2	+	128146705	128158156	upstream	NM_006609	MAP3K2	mitogen-activated protein kinase kinase kinase	0.00145987	2.31843	up	chr2	-	128062138	128100770
ENST00000417443	NCRNA00086	0.000379	3.25753	down	Ensembl	2913	chrX	+	134555867	134559682	downstream	NM_182540	DDX26B	protein DDX26B	6.66e-05	2.38895	down	chrX	+	134654554	134716460
ENST00000450520	RP11-216M21.7	0.00285539	3.07463	down	Ensembl	3200	chr9	-	42363047	42367092	upstream	NM_001012421	ANKRD20A2	ankyrin repeat domain 20 family, member A2	7.52e-07	6.70403	up	chr9	+	42368302	42411410
ENST00000447720	KB-1183D5.13	0.000668	6.09146	down	Ensembl	3215	chr22	-	21655278	21679331	upstream	NM_001128635	RIMBP3B	RIMS-binding protein 3B	0.000128046	3.55906	down	chr22	+	21738039	21743455
NR_033370	LOC63930	0.000173705	3.41241	down	RefSeq_NR	3366	chr20	+	61640734	61716423	upstream	NM_002531	NTSR1	neurotensin receptor type 1	0.0286456	2.1937	down	chr20	+	61340188	61394123
NR_033370	LOC63930	0.000173705	3.41241	down	RefSeq_NR	3366	chr20	+	61640734	61716423	upstream	NM_001853	COL9A3	collagen alpha-3(IX) chain precursor	0.000285222	3.92665	down	chr20	+	61448413	61472511
uc002qgt.1	BC131616	0.00218627	3.58674	down	UCSC_knowngene	2014	chr19	+	55219699	55224842	upstream	NM_006863	LILRA1	leukocyte immunoglobulin-like receptor subfamily	0.0014935	2.17566	down	chr19	+	55105112	55112540
uc002qgt.1	BC131616	0.00218627	3.58674	down	UCSC_knowngene	2014	chr19	+	55219699	55224842	downstream	NM_001080770	KIR2DL4	killer cell immunoglobulin-like receptor 2DL4	0.0147189	2.35871	up	chr19	+	55315066	55325972
uc002sdy.1	AK123766	2.32341e-07	49.3182	down	UCSC_knowngene	2100	chr2	-	67350488	67442451	upstream	NM_019002	ETAA1	ewing's tumor-associated antigen 1	0.000482	3.41111	up	chr2	+	67624441	67637533
NR_026951	C17orf44	0.00452044	2.60847	down	RefSeq_NR	2115	chr17	-	8123948	8127361	upstream	NM_001177802	RANGRF	ran guanine nucleotide release factor isoform C	0.00727127	2.91811	down	chr17	+	8191968	8193409
NR_026951	C17orf44	0.00452044	2.60847	down	RefSeq_NR	2115	chr17	-	8123948	8127361	upstream	NM_001146684	RNF222	RING finger protein 222	5.14e-06	14.9093	down	chr17	-	8294022	8301144
NR_015447	LOC153684	0.0145	2.0179	down	RefSeq_NR	2261	chr5	+	43042235	43045370	downstream	NM_003432	ZNF131	zinc finger protein 131	0.000125	4.79034	up	chr5	+	43121641	43175823
ENST00000439050	AC009299.3	2.41076e-06	12.3911	down	Ensembl	2333	chr2	+	162101249	162105561	upstream	NM_133484	TANK	TRAF family member-associated NF-kappa-B	0.000494	2.20444	up	chr2	+	161993465	162061490
ENST00000439050	AC009299.3	2.41076e-06	12.3911	down	Ensembl	2333	chr2	+	162101249	162105561	upstream	NM_004180	TANK	TRAF family member-associated NF-kappa-B	9.05e-05	2.4006	up	chr2	+	161993465	162092682
ENST00000399543	AC025171.1	0.000137101	2.09772	down	Ensembl	2423	chr5	+	43042194	43045492	downstream	NM_003432	ZNF131	zinc finger protein 131	0.000125	4.79034	up	chr5	+	43121641	43175823
NR_027036	LOC100271722	0.008821	2.7686	down	RefSeq_NR	1625	chr22	-	46435788	46440748	downstream	NM_001167621	ATXN10	ataxin-10 isoform 2	4.39e-05	3.41253	up	chr22	+	46067677	46241187
NR_033376	NCRNA00222	0.00789817	2.84221	down	RefSeq_NR	1753	chr6	+	109072856	109091145	downstream	NM_032131	ARMC2	armadillo repeat-containing protein 2	0.000654	12.0703	down	chr6	+	109169618	109295352
uc011djk.1	FLJ22536	0.00638	5.96864	up	UCSC_knowngene	1806	chr6	+	21668877	22194614	upstream	NM_003107	SOX4	transcription factor SOX-4	7.89e-05	3.9809	up	chr6	+	21593971	21598849
ENST00000416805	RP11-413E1.3	0.00207374	2.80987	down	Ensembl	1835	chr1	+	90229103	90235462	downstream	NM_182975	ZNF326	zinc finger protein 326 isoform 3	0.00447	3.86147	up	chr1	+	90460677	90472000
ENST00000416805	RP11-413E1.3	0.00207374	2.80987	down	Ensembl	1835	chr1	+	90229103	90235462	downstream	NM_182976	ZNF326	zinc finger protein 326 isoform 1	0.000107	3.63608	up	chr1	+	90460677	90494094
uc002rqj.1	AK057187	0.0118853	3.29574	down	UCSC_knowngene	1889	chr2	-	38053389	38056541	upstream	NM_000104	CYP1B1	cytochrome P450 1B1	4.49e-05	3.6177	up	chr2	-	38294745	38303323
ENST00000326734	FAM87B	2.3e-05	5.28859	up	Ensembl	1944	chr1	+	752750	755214	downstream	NM_198576	AGRN	agrin precursor	5.09e-05	2.58116	up	chr1	+	955502	991492
AK055023		7.4847e-05	2.11385	down	misc_RNA	1974	chr10	-	72689681	72695453	downstream	NM_080722	ADAMTS14	A disintegrin and metalloproteinase with	1.76e-05	6.32605	up	chr10	+	72432558	72522195
ENST00000423943	RP11-48O20.4	1.03e-06	8.46551	down	Ensembl	1113	chr1	+	159931013	159948851	upstream	NM_003564	TAGLN2	transgelin-2	0.000135	4.478	up	chr1	-	159887902	159895284
ENST00000417705	RP11-54O7.3	5.6284e-05	20.4114	down	Ensembl	1389	chr1	-	852249	855072	upstream	NM_152486	SAMD11	sterile alpha motif domain-containing protein	0.000565153	6.25666	down	chr1	+	861120	879961
ENST00000417705	RP11-54O7.3	5.6284e-05	20.4114	down	Ensembl	1389	chr1	-	852249	855072	upstream	NM_198576	AGRN	agrin precursor	5.09e-05	2.58116	up	chr1	+	955502	991492
ENST00000433572	RP11-542K23.7	0.0113	2.34376	down	Ensembl	830	chr9	+	125165685	125211256	upstream	NM_198469	MORN5	MORN repeat-containing protein 5	2.55594e-06	680.497	down	chr9	+	124922189	124962367
ENST00000433572	RP11-542K23.7	0.0113	2.34376	down	Ensembl	830	chr9	+	125165685	125211256	upstream	NM_001173512	MRRF	ribosome-recycling factor, mitochondrial isoform	0.000101	2.3289	up	chr9	+	125026881	125085742
uc002tkz.1	CR601322	0.00338787	2.96963	down	UCSC_knowngene	844	chr2	+	114737145	114764879	upstream	NM_025181	SLC35F5	solute carrier family 35 member F5	0.000107	2.13466	up	chr2	-	114471932	114514400
ENST00000415195	XXbac-BPG249D20.9	0.0153487	6.61618	down	Ensembl	851	chr6	+	30484042	30486994	downstream	NM_001090	ABCF1	ATP-binding cassette sub-family F member 1	0.00344776	2.60909	up	chr6	+	30539169	30559309
ENST00000432701	RP11-269C23.3	0.00103	2.16072	down	Ensembl	858	chr13	-	44974486	44980002	downstream	NM_001010897	SERP2	stress-associated endoplasmic reticulum protein	0.0336964	2.05743	down	chr13	+	44947977	44971850
ENST00000449713	AP001065.15	0.000280622	2.4045	down	Ensembl	912	chr21	+	45905459	45910171	upstream	NM_013369	DNMT3L	DNA (cytosine-5)-methyltransferase 3-like	1.34e-07	104.407	up	chr21	-	45666222	45682099
ENST00000449713	AP001065.15	0.000280622	2.4045	down	Ensembl	912	chr21	+	45905459	45910171	downstream	NM_198691	KRTAP10-1	keratin-associated protein 10-1	0.000146696	3.40657	down	chr21	-	45959067	45960078
ENST00000449713	AP001065.15	0.000280622	2.4045	down	Ensembl	912	chr21	+	45905459	45910171	downstream	NM_198690	KRTAP10-9	keratin-associated protein 10-9	0.0404	2.53159	down	chr21	+	46047039	46048295
ENST00000449713	AP001065.15	0.000280622	2.4045	down	Ensembl	912	chr21	+	45905459	45910171	downstream	NM_181688	KRTAP10-10	keratin-associated protein 10-10	4.92e-05	3.01715	up	chr21	+	46057272	46058372
ENST00000417084	RP11-6J21.2	0.0149584	2.28141	down	Ensembl	917	chr1	+	207422411	207482466	downstream	NM_001114752	CD55	complement decay-accelerating factor isoform 2	0.000168	2.98707	down	chr1	+	207494816	207534311
ENST00000417084	RP11-6J21.2	0.0149584	2.28141	down	Ensembl	917	chr1	+	207422411	207482466	downstream	NM_001006658	CR2	complement receptor type 2 isoform 1 precursor	0.00019	37.0649	down	chr1	+	207627644	207663240
ENST00000417084	RP11-6J21.2	0.0149584	2.28141	down	Ensembl	917	chr1	+	207422411	207482466	downstream	NM_000573	CR1	complement receptor type 1 isoform F precursor	0.00188713	2.1036	down	chr1	+	207669472	207815110
ENST00000432296	RP11-31E23.1	0.00876487	2.99815	down	Ensembl	930	chr1	-	198776786	198906539	downstream	NM_002838	PTPRC	receptor-type tyrosine-protein phosphatase C	0.0246	2.53026	down	chr1	+	198608136	198726545
uc001uzl.2	BC025370	5.56942e-07	32.7811	down	UCSC_knowngene	976	chr13	-	44974387	44980021	downstream	NM_001010897	SERP2	stress-associated endoplasmic reticulum protein	0.0336964	2.05743	down	chr13	+	44947977	44971850
ENST00000457725	AP003774.6	0.000597	3.7419	down	Ensembl	985	chr11	-	64161813	64163303	downstream	NM_001039496	C11orf20	hypothetical protein LOC25858	0.000610645	4.41806	down	chr11	+	64067862	64072239
ENST00000457725	AP003774.6	0.000597	3.7419	down	Ensembl	985	chr11	-	64161813	64163303	downstream	NM_001006944	RPS6KA4	ribosomal protein S6 kinase alpha-4 isoform b	0.000476	2.31079	up	chr11	+	64126624	64139687
ENST00000451101	AC019172.2	0.0014196	8.62695	down	Ensembl	717	chr2	+	3891773	3895001	upstream	NM_001011	RPS7	40S ribosomal protein S7	4.5435e-06	4.76194	up	chr2	+	3622852	3628509
ENST00000450860	RP5-1091N2.9	0.0002181	4.32125	down	Ensembl	726	chrX	-	70403408	70418025	downstream	NM_013346	SNX12	sorting nexin-12	0.00776	2.01563	up	chrX	-	70280787	70288231
ENST00000450860	RP5-1091N2.9	0.0002181	4.32125	down	Ensembl	726	chrX	-	70403408	70418025	upstream	NM_007363	NONO	non-POU domain-containing octamer-binding	9.09e-05	5.09641	up	chrX	+	70503041	70521018
ENST00000367276	C9orf44	0.0121082	2.39647	up	Ensembl	738	chr9	+	94903579	94910588	upstream	NM_006415	SPTLC1	serine palmitoyltransferase 1 isoform a	1.19277e-05	2.11081	up	chr9	-	94793426	94877690
ENST00000367276	C9orf44	0.0121082	2.39647	up	Ensembl	738	chr9	+	94903579	94910588	downstream	NM_013417	IARS	isoleucyl-tRNA synthetase, cytoplasmic	0.00635	2.28645	up	chr9	-	94972624	95055972
ENST00000442214	AC104654.1	0.00786	2.65084	up	Ensembl	741	chr2	+	42104695	42120186	downstream	NM_001145076	EML4	echinoderm microtubule-associated protein-like 4	0.000109	4.10442	up	chr2	+	42396489	42559688
ENST00000468538	RP1-149M18.4	0.00579884	2.61363	down	Ensembl	743	chr6	+	41373556	41374299	upstream	NM_018965	TREM2	triggering receptor expressed on myeloid cells 2	2.25e-05	11.8787	up	chr6	-	41126245	41130922
ENST00000468538	RP1-149M18.4	0.00579884	2.61363	down	Ensembl	743	chr6	+	41373556	41374299	upstream	NM_004828	NCR2	natural cytotoxicity triggering receptor 2	0.0158	2.0655	down	chr6	+	41303527	41318625
ENST00000449954	AL078621.3	7.85847e-07	7.94961	down	Ensembl	745	chr2	+	114270039	114273062	downstream	NM_007082	RABL2A	rab-like protein 2A	8.83638e-05	2.98545	down	chr2	+	114384816	114400975
ENST00000449954	AL078621.3	7.85847e-07	7.94961	down	Ensembl	745	chr2	+	114270039	114273062	downstream	NM_025181	SLC35F5	solute carrier family 35 member F5	0.000107	2.13466	up	chr2	-	114471932	114514400
ENST00000437920	RP1-148H17.1	0.000402746	4.878	down	Ensembl	750	chr20	-	46020672	46041071	downstream	NM_005244	EYA2	eyes absent homolog 2 isoform a	0.0163337	2.07163	down	chr20	+	45523262	45817492
ENST00000412357	RP5-1114G22.2	0.00712198	3.03534	down	Ensembl	775	chr1	-	175172363	175173985	downstream	NM_014857	RABGAP1L	rab GTPase-activating protein 1-like isoform A	0.000971233	2.00589	down	chr1	+	174128633	174927327
ENST00000412357	RP5-1114G22.2	0.00712198	3.03534	down	Ensembl	775	chr1	-	175172363	175173985	downstream	NM_014656	KIAA0040	hypothetical protein LOC9674	0.000139927	2.77635	down	chr1	-	175126122	175161949
ENST00000412772	RP11-134P9.3	0.00390526	2.43526	down	Ensembl	775	chr1	+	203256279	203257929	upstream	NM_004997	MYBPH	myosin-binding protein H	0.00944303	3.50549	up	chr1	-	203136938	203144942
ENST00000412772	RP11-134P9.3	0.00390526	2.43526	down	Ensembl	775	chr1	+	203256279	203257929	upstream	NM_003465	CHIT1	chitotriosidase-1 precursor	0.000384	4.00022	up	chr1	-	203185206	203198860
uc002qwn.1	BC043553	0.0031882	2.22667	down	UCSC_knowngene	776	chr2	-	780346	863877	upstream	NM_018968	SNTG2	gamma-2-syntrophin	3.78e-06	2.56668	down	chr2	+	946553	1371384
ENST00000414488	AL132709.5	0.00833	3.27485	up	Ensembl	800	chr14	+	101415314	101424887	upstream	NM_001134888	RTL1	retrotransposon-like protein 1	0.000568062	2.48633	down	chr14	-	101346991	101351184
ENST00000451118	WI2-85898F10.1	0.0022958	2.79719	down	Ensembl	805	chr22	-	46271878	46283628	downstream	NM_006486	FBLN1	fibulin-1 isoform D precursor	1e-05	2.39903	up	chr22	+	45898718	45997014
ENST00000451118	WI2-85898F10.1	0.0022958	2.79719	down	Ensembl	805	chr22	-	46271878	46283628	downstream	NM_013236	ATXN10	ataxin-10 isoform 1	4.2e-05	2.37811	up	chr22	+	46067677	46241187
NR_015395	LOC541471	0.00889	2.63529	up	RefSeq_NR	809	chr2	-	112124590	112252692	downstream	NM_138621	BCL2L11	bcl-2-like protein 11 isoform 1	0.00436	2.13869	down	chr2	+	111878490	111926022
ENST00000457157	AP000688.8	9.01448e-06	14.508	down	Ensembl	811	chr21	+	37377635	37379899	downstream	NM_001236	CBR3	carbonyl reductase [NADPH] 3	5.2e-05	2.10613	down	chr21	+	37507262	37518860
ENST00000433081	RP11-458D21.1	0.000233	2.05383	up	Ensembl	814	chr1	-	145376124	145382397	upstream	NM_144698	ANKRD35	ankyrin repeat domain-containing protein 35	1.08821e-05	13.1348	down	chr1	+	145549208	145568526
ENST00000435421	RP11-143M1.3	0.000759	7.27413	down	Ensembl	612	chr9	-	100803	102850	upstream	NM_203447	DOCK8	dedicator of cytokinesis protein 8 isoform 1	0.00103168	3.53115	down	chr9	+	214864	465259
ENST00000455966	RP1-224A6.3	0.00219602	2.26196	down	Ensembl	615	chr1	-	22350486	22351461	downstream	NM_005747	CELA3A	chymotrypsin-like elastase family member 3A	0.0119093	2.68099	up	chr1	+	22328148	22339035
ENST00000442197	AL132709.9	0.0106	3.1708	up	Ensembl	625	chr14	+	101427363	101433377	upstream	NM_001134888	RTL1	retrotransposon-like protein 1	0.000568062	2.48633	down	chr14	-	101346991	101351184
uc001lln.2	AF086154	0.0105772	2.21361	down	UCSC_knowngene	632	chr10	-	134325131	134331695	downstream	NM_173575	STK32C	serine/threonine-protein kinase 32C	1.34798e-05	5.66175	down	chr10	-	134020995	134121477
uc001lln.2	AF086154	0.0105772	2.21361	down	UCSC_knowngene	632	chr10	-	134325131	134331695	downstream	NM_030626	LRRC27	leucine-rich repeat-containing protein 27	5.3398e-05	4.00169	down	chr10	+	134145613	134195010
ENST00000437113	RP11-214F16.4	0.0179527	4.18735	down	Ensembl	652	chr13	+	100229365	100232622	downstream	NM_206808	CLYBL	citrate lyase subunit beta-like protein,	5.65717e-06	5.63801	down	chr13	+	100258918	100549388
ENST00000450671	RP3-475N16.1	0.011035	2.36506	down	Ensembl	679	chr6	+	42908101	42911708	downstream	NM_018960	GNMT	glycine N-methyltransferase	0.014067	4.26132	down	chr6	+	42928499	42931618
ENST00000449457	RP11-445P17.8	0.00361	3.63734	down	Ensembl	692	chr10	-	5307995	5313199	upstream	NM_017422	CALML5	calmodulin-like protein 5	5.3445e-06	7.83711	down	chr10	-	5540657	5541533
ENST00000447883	RP11-277L2.3	2.30405e-05	2.90445	down	Ensembl	561	chr1	-	149576590	149577296	upstream	NM_001040874	HIST2H2AA4	histone H2A type 2-A	5.82e-05	3.05078	down	chr1	+	149822627	149823161
ENST00000443303	RP3-523C21.1	0.00145148	8.75878	down	Ensembl	569	chr6	+	132455550	132490514	upstream	NM_006208	ENPP1	ectonucleotide pyrophosphatase/phosphodiesterase	0.000369008	2.83833	down	chr6	+	132129155	132216295
ENST00000417932	RP11-10J5.1	0.00310617	4.56702	up	Ensembl	573	chr6	-	138264215	138266939	downstream	NM_006290	TNFAIP3	tumor necrosis factor alpha-induced protein 3	0.00226	2.04225	up	chr6	+	138188580	138204449
ENST00000454185	RP11-568A7.3	0.000179924	31.3018	down	Ensembl	579	chr6	-	167650995	167653968	downstream	NM_004367	CCR6	C-C chemokine receptor type 6	0.00138	2.34451	down	chr6	+	167525294	167552629
ENST00000437830	XX-CR54.1	0.00994044	2.06595	down	Ensembl	580	chr1	+	248855491	248862411	upstream	NM_001013355	OR2G6	olfactory receptor 2G6	1.48286e-05	4.69524	down	chr1	+	248684947	248685898
ENST00000437830	XX-CR54.1	0.00994044	2.06595	down	Ensembl	580	chr1	+	248855491	248862411	downstream	NM_030645	SH3BP5L	SH3 domain-binding protein 5-like	0.00337595	2.39666	down	chr1	-	249104650	249120154
uc003zfy.2	AY343902	0.000144123	3.67004	down	UCSC_knowngene	581	chr9	-	100994	102941	upstream	NM_203447	DOCK8	dedicator of cytokinesis protein 8 isoform 1	0.00103168	3.53115	down	chr9	+	214864	465259
ENST00000452181	RP1-90G24.6	0.0101548	5.3544	down	Ensembl	590	chr22	+	32669406	32673173	upstream	NM_006605	RFPL2	ret finger protein-like 2 isoform 1	0.00893062	3.24264	down	chr22	-	32586421	32589466
ENST00000452181	RP1-90G24.6	0.0101548	5.3544	down	Ensembl	590	chr22	+	32669406	32673173	downstream	NM_012179	FBXO7	F-box only protein 7 isoform 1	8.83e-05	2.11373	up	chr22	+	32870706	32894818
ENST00000424705	RP3-461P17.10	0.000146769	2.90197	down	Ensembl	514	chr20	+	44076041	44076982	upstream	NM_002638	PI3	elafin preproprotein	3.09826e-06	118.957	down	chr20	+	43803539	43805185
ENST00000424705	RP3-461P17.10	0.000146769	2.90197	down	Ensembl	514	chr20	+	44076041	44076982	upstream	NM_003064	SLPI	antileukoproteinase precursor	8.71498e-07	253.232	down	chr20	-	43880878	43883206
ENST00000424705	RP3-461P17.10	0.000146769	2.90197	down	Ensembl	514	chr20	+	44076041	44076982	upstream	NM_030590	MATN4	matrilin-4 isoform 2 precursor	0.0322513	2.41199	down	chr20	-	43922086	43936967
ENST00000424705	RP3-461P17.10	0.000146769	2.90197	down	Ensembl	514	chr20	+	44076041	44076982	downstream	NM_006652	SPINT3	kunitz-type protease inhibitor 3 precursor	0.00103338	3.066	down	chr20	-	44141100	44144264
ENST00000424705	RP3-461P17.10	0.000146769	2.90197	down	Ensembl	514	chr20	+	44076041	44076982	downstream	NM_080753	WFDC10A	WAP four-disulfide core domain protein 10A	0.0367848	2.22988	up	chr20	+	44258384	44259831
ENST00000424705	RP3-461P17.10	0.000146769	2.90197	down	Ensembl	514	chr20	+	44076041	44076982	downstream	NM_178455	SPINT4	kunitz-type protease inhibitor 4 precursor	0.00178	3.79839	down	chr20	+	44350987	44354335
ENST00000456082	RP11-478H13.1	0.0262187	2.71159	up	Ensembl	517	chr10	+	29032673	29033592	upstream	NM_016628	WAC	WW domain-containing adapter protein with	0.00452	2.50154	up	chr10	+	28822423	28909923
ENST00000444862	AP005273.1	0.000428231	3.51908	down	Ensembl	522	chr11	+	64268324	64272858	upstream	NM_001177358	GPR137	integral membrane protein GPR137 isoform 5	0.00728	2.52368	up	chr11	+	64052282	64056972
ENST00000444862	AP005273.1	0.000428231	3.51908	down	Ensembl	522	chr11	+	64268324	64272858	downstream	NM_153378	SLC22A12	solute carrier family 22 member 12 isoform b	0.0174	2.59957	down	chr11	+	64358281	64369820
ENST00000442712	RP11-439E19.7	0.000395264	2.31502	down	Ensembl	522	chr1	+	246853348	246855123	downstream	NM_020394	ZNF695	zinc finger protein 695 isoform 1	2.2649e-05	8.99627	up	chr1	-	247148624	247171395
ENST00000440397	RP11-95M15.1	1.51e-05	46.9447	up	Ensembl	523	chr6	+	137994596	137995691	downstream	NM_006290	TNFAIP3	tumor necrosis factor alpha-induced protein 3	0.00226	2.04225	up	chr6	+	138188580	138204449
ENST00000441085	RP11-98G7.1	0.00589	3.89807	up	Ensembl	523	chr1	-	156416203	156426258	downstream	NM_198406	PAQR6	progestin and adipoQ receptor family member 6	0.00052	2.37546	up	chr1	-	156213208	156217792
ENST00000441085	RP11-98G7.1	0.00589	3.89807	up	Ensembl	523	chr1	-	156416203	156426258	upstream	NM_198427	BCAN	brevican core protein isoform 2	0.00608224	4.49371	down	chr1	+	156611739	156623264
ENST00000448282	RP1-102H19.6	0.00338	4.32775	up	Ensembl	542	chr6	+	88081310	88102519	downstream	NM_001031743	C6orf165	hypothetical protein LOC154313	1.22813e-05	32.4942	down	chr6	+	88117689	88174191
ENST00000439823	AC002480.4	0.00652087	3.11324	up	Ensembl	557	chr7	+	22629323	22631241	downstream	NM_000600	IL6	interleukin-6 precursor	0.000592	4.80249	up	chr7	+	22766765	22771621
ENST00000457239	RP11-71G12.1	9.36e-06	11.5433	down	Ensembl	471	chr1	+	157155177	157157195	upstream	NM_144702	LRRC71	leucine-rich repeat-containing protein 71	0.0369979	42.366	down	chr1	+	156890423	156902880
ENST00000412060	Z83851.1	0.00128773	2.11508	down	Ensembl	475	chr22	-	42760407	42765214	downstream	NM_181492	TCF20	transcription factor 20 isoform 2	0.000259	2.36798	up	chr22	-	42556018	42611445
ENST00000412797	RP11-70P17.1	2.62952e-05	9.12495	down	Ensembl	483	chr1	+	25907968	25916847	downstream	NM_020379	MAN1C1	mannosyl-oligosaccharide 1,2-alpha-mannosidase	3.36757e-05	2.04597	down	chr1	+	25943958	26111258
ENST00000420876	RP11-511I2.2	0.000470146	5.11442	down	Ensembl	483	chr1	-	47846599	47874149	downstream	NM_001136140	CMPK1	UMP-CMP kinase isoform b	0.000164705	2.74799	up	chr1	+	47799468	47844511
ENST00000420876	RP11-511I2.2	0.000470146	5.11442	down	Ensembl	483	chr1	-	47846599	47874149	downstream	NM_016308	CMPK1	UMP-CMP kinase isoform a	1.36e-05	2.10859	up	chr1	+	47799468	47844511
ENST00000446145	RP11-239E10.3	0.00104	4.94351	up	Ensembl	487	chr1	+	223354485	223361496	upstream	NM_003268	TLR5	toll-like receptor 5 precursor	0.0116	17.0262	up	chr1	-	223282747	223316624
ENST00000438829	RP11-413P11.1	0.00112354	5.18947	down	Ensembl	495	chr1	-	99937917	99999571	upstream	NM_017734	PALMD	palmdelphin	7.24011e-06	6.49584	down	chr1	+	100111430	100160097
uc001hpx.2	BC032899	0.00605	4.50848	up	UCSC_knowngene	502	chr1	+	226271655	226277990	upstream	NM_003133	SRP9	signal recognition particle 9 kDa protein	1.92e-05	3.48554	up	chr1	+	225965514	225978168
uc001hpx.2	BC032899	0.00605	4.50848	up	UCSC_knowngene	502	chr1	+	226271655	226277990	downstream	NM_173083	LIN9	protein lin-9 homolog	0.000312	13.8227	up	chr1	-	226418860	226497198
ENST00000414795	AC017076.5	0.00219	3.9715	up	Ensembl	506	chr2	-	6969010	6980595	upstream	NM_080657	RSAD2	radical S-adenosyl methionine domain-containing	0.00035	12.2504	up	chr2	+	7017795	7038363
uc001fuu.2	AF088076	0.0113	2.45427	down	UCSC_knowngene	423	chr1	+	159931073	159946734	downstream	NM_000702	ATP1A2	sodium/potassium-transporting ATPase subunit	1.88582e-06	17.7696	down	chr1	+	160085519	160113374
uc010nxz.1	FLJ39609	0.02315	2.01049	down	UCSC_knowngene	436	chr1	-	852952	854817	upstream	NM_005101	ISG15	ubiquitin-like protein ISG15 precursor	2.45152e-06	6.81599	up	chr1	+	948846	949919
uc010nxz.1	FLJ39609	0.02315	2.01049	down	UCSC_knowngene	436	chr1	-	852952	854817	upstream	NM_001130045	TTLL10	inactive polyglycylase TTLL10 isoform 1	5.63938e-07	7.97736	down	chr1	+	1109285	1133313
uc010nxz.1	FLJ39609	0.02315	2.01049	down	UCSC_knowngene	436	chr1	-	852952	854817	upstream	NM_153254	TTLL10	inactive polyglycylase TTLL10 isoform 2	0.000750884	5.01106	down	chr1	+	1115076	1121243
ENST00000415138	AC097495.2	0.03144	2.25136	down	Ensembl	436	chr2	+	69059175	69064840	upstream	NM_173545	APLF	aprataxin and PNK-like factor	0.000484626	2.21356	up	chr2	+	68694690	68807294
ENST00000440492	RP11-288L9.1	0.000513	10.1136	up	Ensembl	441	chr1	-	27986838	27989233	upstream	NM_022872	IFI6	interferon alpha-inducible protein 6 isoform b	9.9e-06	6.26185	up	chr1	-	27992571	27998724
ENST00000440492	RP11-288L9.1	0.000513	10.1136	up	Ensembl	441	chr1	-	27986838	27989233	upstream	NM_018053	XKR8	XK-related protein 8	0.00105	2.28097	down	chr1	+	28286503	28294604
ENST00000451438	RP11-168L22.2	0.0112787	2.59108	down	Ensembl	391	chr10	+	43819112	43823380	upstream	NM_020630	RET	proto-oncogene tyrosine-protein kinase receptor	5.09e-07	4.3986	down	chr10	+	43572516	43622952
ENST00000451438	RP11-168L22.2	0.0112787	2.59108	down	Ensembl	391	chr10	+	43819112	43823380	upstream	NM_020975	RET	proto-oncogene tyrosine-protein kinase receptor	2.49e-06	6.46801	down	chr10	+	43572516	43625797
ENST00000451438	RP11-168L22.2	0.0112787	2.59108	down	Ensembl	391	chr10	+	43819112	43823380	downstream	NM_001098205	HNRNPF	heterogeneous nuclear ribonucleoprotein F	0.00508	3.00107	down	chr10	-	43881064	43904332
ENST00000451438	RP11-168L22.2	0.0112787	2.59108	down	Ensembl	391	chr10	+	43819112	43823380	downstream	NM_001098204	HNRNPF	heterogeneous nuclear ribonucleoprotein F	0.00128439	2.19397	up	chr10	-	43881064	43904696
ENST00000451438	RP11-168L22.2	0.0112787	2.59108	down	Ensembl	391	chr10	+	43819112	43823380	downstream	NM_145312	ZNF485	zinc finger protein 485	0.00109	2.17833	up	chr10	+	44101854	44113352
ENST00000418403	RP11-462G2.1	0.00105015	3.03503	down	Ensembl	397	chr6	+	71104589	71109120	downstream	NM_001105531	FAM135A	hypothetical protein LOC57579 isoform a	0.00125	2.71191	up	chr6	+	71123106	71270877
ENST00000429853	RP4-726N1.2	0.00369	6.36354	up	Ensembl	400	chr20	+	18040136	18051652	upstream	NM_052865	C20orf72	hypothetical protein LOC92667	0.000553	2.02878	up	chr20	+	17949761	17971762
ENST00000415726	RP11-336K24.5	0.0269654	4.02359	down	Ensembl	401	chr1	+	155961180	155971578	downstream	NM_198406	PAQR6	progestin and adipoQ receptor family member 6	0.00052	2.37546	up	chr1	-	156213208	156217792
ENST00000438178	AC008278.2	0.00203363	7.02771	down	Ensembl	409	chr2	+	15704293	15713992	downstream	NM_004939	DDX1	ATP-dependent RNA helicase DDX1	0.000281	2.48085	up	chr2	+	15731769	15771225
uc001fuu.2	AF088076	0.0113	2.45427	down	UCSC_knowngene	423	chr1	+	159931073	159946734	upstream	NM_003564	TAGLN2	transgelin-2	0.000135	4.478	up	chr1	-	159887902	159895284
ENST00000455247	RP5-1109J22.3	0.00146921	2.17751	down	Ensembl	354	chr1	+	46921494	46948147	upstream	NM_005727	TSPAN1	tetraspanin-1	2.56e-06	13.084	down	chr1	+	46640748	46651634
ENST00000416924	RP11-484I6.6	0.000104152	2.88857	down	Ensembl	361	chr13	+	103532285	103533517	upstream	NM_001159596	BIVM	basic immunoglobulin-like variable	0.000818877	2.07858	up	chr13	+	103451398	103493888
ENST00000437899	RP11-38L15.2	6.03656e-05	2.47709	down	Ensembl	369	chr10	-	46937462	46951699	upstream	NM_181519	SYT15	synaptotagmin-15 isoform b	3.23593e-05	3.1	down	chr10	-	46955443	46970601
ENST00000437899	RP11-38L15.2	6.03656e-05	2.47709	down	Ensembl	369	chr10	-	46937462	46951699	upstream	NM_014696	GPRIN2	G protein-regulated inducer of neurite outgrowth	5.18521e-05	30.0045	down	chr10	+	46993545	47000568
ENST00000417800	RP11-240M16.1	0.00223	2.11074	up	Ensembl	381	chr6	+	138266502	138293659	upstream	NM_006290	TNFAIP3	tumor necrosis factor alpha-induced protein 3	0.00226	2.04225	up	chr6	+	138188580	138204449
ENST00000437867	RP11-478K15.2	0.000147013	8.84028	down	Ensembl	266	chr13	+	44717728	44813010	downstream	NM_001010897	SERP2	stress-associated endoplasmic reticulum protein	0.0336964	2.05743	down	chr13	+	44947977	44971850
ENST00000421153	RP4-811H24.8	0.00936846	2.94205	down	Ensembl	267	chr1	+	32817121	32819143	upstream	NM_024296	CCDC28B	coiled-coil domain-containing protein 28B	3.05e-06	2.98542	up	chr1	+	32666201	32670991
ENST00000421153	RP4-811H24.8	0.00936846	2.94205	down	Ensembl	267	chr1	+	32817121	32819143	upstream	NM_001099434	DCDC2B	doublecortin domain-containing protein 2B	7.92332e-06	952.162	down	chr1	+	32674694	32681797
ENST00000428814	RP11-432J24.2	0.000595279	2.82759	down	Ensembl	297	chr10	+	134232586	134234457	upstream	NM_173575	STK32C	serine/threonine-protein kinase 32C	1.34798e-05	5.66175	down	chr10	-	134020995	134121477
ENST00000428814	RP11-432J24.2	0.000595279	2.82759	down	Ensembl	297	chr10	+	134232586	134234457	upstream	NM_030626	LRRC27	leucine-rich repeat-containing protein 27	5.3398e-05	4.00169	down	chr10	+	134145613	134195010
ENST00000428814	RP11-432J24.2	0.000595279	2.82759	down	Ensembl	297	chr10	+	134232586	134234457	upstream	NM_001143757	LRRC27	leucine-rich repeat-containing protein 27	0.00538	2.58215	down	chr10	+	134145740	134195010
ENST00000444515	C1orf46	0.000470605	18.2976	down	Ensembl	302	chr1	+	152627952	152629280	upstream	NM_019060	CRCT1	cysteine-rich C-terminal protein 1	1.59027e-06	882.6	down	chr1	+	152486977	152488481
ENST00000444515	C1orf46	0.000470605	18.2976	down	Ensembl	302	chr1	+	152627952	152629280	downstream	NM_001025231	KPRP	keratinocyte proline-rich protein	0.000214465	88.2132	down	chr1	+	152730505	152734529
ENST00000444515	C1orf46	0.000470605	18.2976	down	Ensembl	302	chr1	+	152627952	152629280	downstream	NM_178351	LCE1C	late cornified envelope protein 1C	8.35e-05	2.44568	up	chr1	-	152777310	152779107
ENST00000442526	RP11-517P14.2	0.00464	3.50272	up	Ensembl	303	chr10	+	43916046	43917254	upstream	NM_020630	RET	proto-oncogene tyrosine-protein kinase receptor	5.09e-07	4.3986	down	chr10	+	43572516	43622952
ENST00000442526	RP11-517P14.2	0.00464	3.50272	up	Ensembl	303	chr10	+	43916046	43917254	upstream	NM_020975	RET	proto-oncogene tyrosine-protein kinase receptor	2.49e-06	6.46801	down	chr10	+	43572516	43625797
ENST00000442526	RP11-517P14.2	0.00464	3.50272	up	Ensembl	303	chr10	+	43916046	43917254	upstream	NM_018590	CSGALNACT2	chondroitin sulfate	0.00161	3.12273	up	chr10	+	43633933	43680749
ENST00000442526	RP11-517P14.2	0.00464	3.50272	up	Ensembl	303	chr10	+	43916046	43917254	upstream	NM_001098205	HNRNPF	heterogeneous nuclear ribonucleoprotein F	0.00508	3.00107	down	chr10	-	43881064	43904332
ENST00000442526	RP11-517P14.2	0.00464	3.50272	up	Ensembl	303	chr10	+	43916046	43917254	upstream	NM_001098204	HNRNPF	heterogeneous nuclear ribonucleoprotein F	0.00128439	2.19397	up	chr10	-	43881064	43904696
ENST00000442526	RP11-517P14.2	0.00464	3.50272	up	Ensembl	303	chr10	+	43916046	43917254	downstream	NM_145312	ZNF485	zinc finger protein 485	0.00109	2.17833	up	chr10	+	44101854	44113352
ENST00000440189	RP11-179B15.5	0.00340355	2.97792	down	Ensembl	328	chr10	+	60064312	60065381	downstream	NM_003338	UBE2D1	ubiquitin-conjugating enzyme E2 D1 isoform 1	0.00173	2.45592	up	chr10	+	60094738	60130513
ENST00000440189	RP11-179B15.5	0.00340355	2.97792	down	Ensembl	328	chr10	+	60064312	60065381	downstream	NM_003201	TFAM	transcription factor A, mitochondrial precursor	8.67e-06	4.21629	up	chr10	+	60145175	60155897
ENST00000440189	RP11-179B15.5	0.00340355	2.97792	down	Ensembl	328	chr10	+	60064312	60065381	downstream	NM_001080512	BICC1	protein bicaudal C homolog 1	0.00823	2.95001	up	chr10	+	60272903	60588845
ENST00000454647	C18orf20	0.000836085	2.19685	down	Ensembl	339	chr18	-	61747535	61765844	downstream	NM_001123366	HMSD	serpin-like protein HMSD precursor	3.13e-06	3.04596	up	chr18	+	61616587	61627645
ENST00000452795	RP4-798A10.4	8.54375e-06	4.52732	down	Ensembl	342	chr1	+	16847188	16848303	upstream	NM_001145278	NECAP2	adaptin ear-binding coat-associated protein 2	0.0159	2.14944	up	chr1	+	16767166	16786584
ENST00000417443	NCRNA00086	0.000379	3.25753	down	Ensembl	2913	chrX	+	134555867	134559682	upstream	NM_152695	ZNF449	zinc finger protein 449	6.19e-06	2.37726	up	chrX	+	134478695	134497338
NR_033370	LOC63930	0.000173705	3.41241	down	RefSeq_NR	3366	chr20	+	61640734	61716423	upstream	NM_017896	C20orf11	protein C20orf11	3.71e-05	4.75982	up	chr20	+	61569440	61579827
NR_033370	LOC63930	0.000173705	3.41241	down	RefSeq_NR	3366	chr20	+	61640734	61716423	downstream	NM_000744	CHRNA4	neuronal acetylcholine receptor subunit alpha-4	0.0016658	7.72327	down	chr20	-	61974664	61992695
uc002khh.2	LOC388312	2.82e-05	2.57153	up	UCSC_knowngene	4812	chr1	-	661139	679736	upstream	NM_005101	ISG15	ubiquitin-like protein ISG15 precursor	2.45152e-06	6.81599	up	chr1	+	948846	949919
NR_026790	HCG11	0.000143	2.22629	up	RefSeq_NR	5688	chr6	+	26521933	26527610	upstream	NM_003540	HIST1H4F	histone H4	0.00761	2.64179	down	chr6	+	26240653	26241021
ENST00000450248	TUG1	6.12e-05	3.41477	up	Ensembl	6477	chr22	+	31365642	31374831	downstream	NM_006932	SMTN	smoothelin isoform c	0.00217	3.09889	up	chr22	+	31477304	31500609
ENST00000450248	TUG1	6.12e-05	3.41477	up	Ensembl	6477	chr22	+	31365642	31374831	downstream	NM_001002837	INPP5J	phosphatidylinositol 4,5-bisphosphate	8.89e-05	2.44041	up	chr22	+	31518960	31530683
ENST00000450248	TUG1	6.12e-05	3.41477	up	Ensembl	6477	chr22	+	31365642	31374831	downstream	NM_005569	LIMK2	LIM domain kinase 2 isoform 2a	0.000292348	2.3909	down	chr22	+	31608249	31676066
NR_027418	LOC651250	0.000106995	2.26881	down	RefSeq_NR	11210	chr17	+	66097695	66132068	upstream	NM_004459	BPTF	nucleosome-remodeling factor subunit BPTF	0.0004009	2.25472	up	chr17	+	65821779	65980494
NR_027418	LOC651250	0.000106995	2.26881	down	RefSeq_NR	11210	chr17	+	66097695	66132068	downstream	NM_001033574	AMZ2	archaemetzincin-2 isoform 2	0.0021849	3.6481	up	chr17	+	66244144	66253305
ENST00000439207	RP11-568A7.2	0.000779	2.31334	down	Ensembl	205	chr6	+	167655378	167659404	upstream	NM_004367	CCR6	C-C chemokine receptor type 6	0.00138	2.34451	down	chr6	+	167525294	167552629
ENST00000439207	RP11-568A7.2	0.000779	2.31334	down	Ensembl	205	chr6	+	167655378	167659404	upstream	NM_031409	CCR6	C-C chemokine receptor type 6	2.34e-05	9.84353	down	chr6	+	167536240	167552629
ENST00000434255	RP1-32B1.4	0.0135912	2.17765	up	Ensembl	216	chr6	+	135581133	135582071	upstream	NM_001145207	HBS1L	HBS1-like protein isoform 3	0.000153321	2.65015	up	chr6	-	135356994	135376036
uc001ihe.3	LOC100216001	0.0340174	2.13009	down	UCSC_knowngene	2553	chr10	-	4621443	4720262	upstream	NM_001353	AKR1C1	aldo-keto reductase family 1 member C1	3.46594e-07	39.5143	down	chr10	+	5005453	5020158
ENST00000512967	AL031123.1	0.00305276	2.66558	down	Ensembl	2641	chr6	-	6695026	6700720	downstream	NM_004271	LY86	lymphocyte antigen 86 precursor	7.33e-06	3.27246	down	chr6	+	6588933	6655216
ENST00000433673	AC068282.3	1.88e-05	9.05125	up	Ensembl	2690	chr2	+	128146705	128158156	upstream	NM_139348	BIN1	myc box-dependent-interacting protein 1 isoform	0.000459	3.60941	down	chr2	-	127805606	127864864
uc001jef.2	LOC643650	4.46e-05	9.59179	up	UCSC_knowngene	2876	chr10	-	47096454	47151400	downstream	NM_181519	SYT15	synaptotagmin-15 isoform b	3.23593e-05	3.1	down	chr10	-	46955443	46970601
uc002khh.2	LOC388312	2.82e-05	2.57153	up	UCSC_knowngene	4812	chr1	-	661139	679736	upstream	NM_152486	SAMD11	sterile alpha motif domain-containing protein	0.000565153	6.25666	down	chr1	+	861120	879961
uc002khh.2	LOC388312	2.82e-05	2.57153	up	UCSC_knowngene	4812	chr1	-	661139	679736	upstream	NM_021170	HES4	transcription factor HES-4 isoform 2	0.000239	3.43637	up	chr1	-	934341	935552
ENST00000484550	AC093627.10	0.000133075	23.4067	down	Ensembl	5008	chr7	+	149596	155465	downstream	NM_020223	FAM20C	dentin matrix protein 4	0.000291	2.6359	up	chr7	+	192968	300711
AK055023		7.4847e-05	2.11385	down	misc_RNA	1974	chr10	-	72689681	72695453	upstream	NM_170744	UNC5B	netrin receptor UNC5B precursor	0.0284	2.18573	up	chr10	+	72972297	73060749
NR_027341	C9orf44	0.000220406	2.44202	down	RefSeq_NR	2000	chr9	+	94903748	94921890	downstream	NM_017680	ASPN	asporin isoform 1 preproprotein	6.03e-05	88.5951	up	chr9	-	95218488	95244844
uc002ubt.1	AK027541	4.78602e-05	9.66434	down	UCSC_knowngene	2013	chr2	+	162101249	162105241	upstream	NM_133484	TANK	TRAF family member-associated NF-kappa-B	0.000494	2.20444	up	chr2	+	161993465	162061490
uc002qgt.1	BC131616	0.00218627	3.58674	down	UCSC_knowngene	2014	chr19	+	55219699	55224842	upstream	NM_021270	LAIR2	leukocyte-associated immunoglobulin-like	9.14e-05	3.10868	down	chr19	+	55014012	55021900
uc002qgt.1	BC131616	0.00218627	3.58674	down	UCSC_knowngene	2014	chr19	+	55219699	55224842	upstream	NM_001130917	LILRA2	leukocyte immunoglobulin-like receptor subfamily	0.00226818	2.07878	down	chr19	+	55085256	55099027
uc002qgt.1	BC131616	0.00218627	3.58674	down	UCSC_knowngene	2014	chr19	+	55219699	55224842	downstream	NM_013289	KIR3DL1	killer cell immunoglobulin-like receptor 3DL1	0.0151	3.56375	down	chr19	+	55327892	55342233
NR_027418	LOC651250	0.000106995	2.26881	down	RefSeq_NR	11210	chr17	+	66097695	66132068	upstream	NM_002266	KPNA2	importin subunit alpha-2	0.000253	2.34463	up	chr17	+	66031847	66042970
NR_026951	C17orf44	0.00452044	2.60847	down	RefSeq_NR	2115	chr17	-	8123948	8127361	downstream	NM_014232	VAMP2	vesicle-associated membrane protein 2	0.000523975	3.26394	down	chr17	-	8062464	8066293
NR_026951	C17orf44	0.00452044	2.60847	down	RefSeq_NR	2115	chr17	-	8123948	8127361	upstream	NM_001177801	RANGRF	ran guanine nucleotide release factor isoform B	0.00104845	3.86263	down	chr17	+	8191968	8193409
NR_026951	C17orf44	0.00452044	2.60847	down	RefSeq_NR	2115	chr17	-	8123948	8127361	upstream	NM_000987	RPL26	60S ribosomal protein L26	0.000218221	2.40543	up	chr17	-	8280833	8286565
NR_033370	LOC63930	0.000173705	3.41241	down	RefSeq_NR	3366	chr20	+	61640734	61716423	upstream	NM_022082	SLC17A9	solute carrier family 17 member 9	4.17581e-05	5.87888	down	chr20	+	61583998	61599949
uc002rby.2	BC035112	0.0141183	2.18612	up	UCSC_knowngene	3502	chr2	-	14368998	14541082	upstream	NM_145175	FAM84A	neurologic sensory protein 1	5.99265e-06	7.60061	down	chr2	+	14772809	14780168
ENST00000466530	RP3-477O4.15	1.07984e-06	2.22163	down	Ensembl	3965	chr20	+	34101395	34105360	downstream	NM_003116	SPAG4	sperm-associated antigen 4 protein	8.04e-07	11.6444	down	chr20	+	34203808	34208965
ENST00000326734	FAM87B	2.3e-05	5.28859	up	Ensembl	1944	chr1	+	752750	755214	downstream	NM_152486	SAMD11	sterile alpha motif domain-containing protein	0.000565153	6.25666	down	chr1	+	861120	879961
ENST00000326734	FAM87B	2.3e-05	5.28859	up	Ensembl	1944	chr1	+	752750	755214	downstream	NM_021170	HES4	transcription factor HES-4 isoform 2	0.000239	3.43637	up	chr1	-	934341	935552
uc001yjz.1	AK094562	0.00197348	2.89995	down	UCSC_knowngene	2638	chr14	+	101536247	101539271	upstream	NM_001134888	RTL1	retrotransposon-like protein 1	0.000568062	2.48633	down	chr14	-	101346991	101351184
AB073661		0.000154	2.11741	up	NRED	2686	chr22	+	31371385	31374065	downstream	NM_006932	SMTN	smoothelin isoform c	0.00217	3.09889	up	chr22	+	31477304	31500609
AB073661		0.000154	2.11741	up	NRED	2686	chr22	+	31371385	31374065	downstream	NM_134269	SMTN	smoothelin isoform b	0.00112	3.37564	up	chr22	+	31477304	31500609
AB073661		0.000154	2.11741	up	NRED	2686	chr22	+	31371385	31374065	downstream	NM_134270	SMTN	smoothelin isoform a	0.00246	2.71942	up	chr22	+	31477304	31500609
AB073661		0.000154	2.11741	up	NRED	2686	chr22	+	31371385	31374065	downstream	NM_005569	LIMK2	LIM domain kinase 2 isoform 2a	0.000292348	2.3909	down	chr22	+	31608249	31676066
ENST00000433673	AC068282.3	1.88e-05	9.05125	up	Ensembl	2690	chr2	+	128146705	128158156	upstream	NM_001001665	CYP27C1	cytochrome P450 27C1	0.000351	4.43537	up	chr2	-	127941411	127963343
NR_027085	LOC284551	0.00765501	3.60028	down	RefSeq_NR	2741	chr1	+	31984035	31989846	upstream	NM_178865	SERINC2	serine incorporator 2 isoform 1	0.000365	3.73663	down	chr1	+	31885962	31907527
NR_027085	LOC284551	0.00765501	3.60028	down	RefSeq_NR	2741	chr1	+	31984035	31989846	downstream	NM_144569	SPOCD1	SPOC domain-containing protein 1	0.00022618	10.1538	up	chr1	-	32256024	32281580
uc002the.2	LOC541471	5.87e-05	2.09802	up	UCSC_knowngene	1583	chr2	-	111965358	112252692	downstream	NM_207002	BCL2L11	bcl-2-like protein 11 isoform 9	6.60465e-05	6.18781	up	chr2	+	111878490	111886423
uc002goc.1	AK123263	5.41403e-06	5.64679	down	UCSC_knowngene	2800	chr17	-	13680148	13695867	upstream	NM_001303	COX10	protoheme IX farnesyltransferase, mitochondrial	0.000116524	2.23718	up	chr17	+	13972718	14111996
NR_027036	LOC100271722	0.008821	2.7686	down	RefSeq_NR	1625	chr22	-	46435788	46440748	downstream	NM_013236	ATXN10	ataxin-10 isoform 1	4.2e-05	2.37811	up	chr22	+	46067677	46241187
NR_027036	LOC100271722	0.008821	2.7686	down	RefSeq_NR	1625	chr22	-	46435788	46440748	upstream	NM_016426	GTSE1	G2 and S phase-expressed protein 1	0.0100721	2.06082	up	chr22	+	46692637	46726707
NR_027036	LOC100271722	0.008821	2.7686	down	RefSeq_NR	1625	chr22	-	46435788	46440748	upstream	NM_018006	TRMU	mitochondrial tRNA-specific 2-thiouridylase 1	7.53e-05	3.07711	up	chr22	+	46731297	46753237
uc001jef.2	LOC643650	4.46e-05	9.59179	up	UCSC_knowngene	2876	chr10	-	47096454	47151400	downstream	NM_014696	GPRIN2	G protein-regulated inducer of neurite outgrowth	5.18521e-05	30.0045	down	chr10	+	46993545	47000568
ENST00000423323	AC015842.1	1.54868e-05	5.93318	down	Ensembl	2998	chr17	-	13679950	13695867	upstream	NM_001303	COX10	protoheme IX farnesyltransferase, mitochondrial	0.000116524	2.23718	up	chr17	+	13972718	14111996
ENST00000446811	RP11-503C24.4	0.0144074	4.02446	down	Ensembl	2246	chr6	+	168643617	168663261	upstream	NM_030615	KIF25	kinesin-like protein KIF25 isoform 1	0.00165	3.49586	down	chr6	+	168418552	168445769
uc001guz.2	EF413001	0.000407	12.2192	up	UCSC_knowngene	2280	chr1	-	198867622	198906558	downstream	NM_002838	PTPRC	receptor-type tyrosine-protein phosphatase C	0.0246	2.53026	down	chr1	+	198608136	198726545
ENST00000439050	AC009299.3	2.41076e-06	12.3911	down	Ensembl	2333	chr2	+	162101249	162105561	downstream	NM_005805	PSMD14	26S proteasome non-ATPase regulatory subunit 14	0.000343	2.03458	up	chr2	+	162164785	162268226
uc002wrm.1	BC090059	0.00246608	2.00505	down	UCSC_knowngene	1294	chr20	+	19780217	19790937	upstream	NM_020689	SLC24A3	sodium/potassium/calcium exchanger 3 precursor	0.00726	2.44366	down	chr20	+	19193289	19703541
uc002wrm.1	BC090059	0.00246608	2.00505	down	UCSC_knowngene	1294	chr20	+	19780217	19790937	downstream	NM_015585	C20orf26	hypothetical protein LOC26074 isoform 1	0.000515	9.65651	down	chr20	+	20033157	20341346
uc003ojj.2	CR624291	6.96358e-05	2.06263	down	UCSC_knowngene	2513	chr6	-	34247456	34249969	downstream	NM_145902	HMGA1	high mobility group protein HMG-I/HMG-Y isoform	1.33e-05	4.05951	up	chr6	+	34204649	34214008
ENST00000417705	RP11-54O7.3	5.6284e-05	20.4114	down	Ensembl	1389	chr1	-	852249	855072	upstream	NM_005101	ISG15	ubiquitin-like protein ISG15 precursor	2.45152e-06	6.81599	up	chr1	+	948846	949919
ENST00000417705	RP11-54O7.3	5.6284e-05	20.4114	down	Ensembl	1389	chr1	-	852249	855072	upstream	NM_001130045	TTLL10	inactive polyglycylase TTLL10 isoform 1	5.63938e-07	7.97736	down	chr1	+	1109285	1133313
ENST00000417705	RP11-54O7.3	5.6284e-05	20.4114	down	Ensembl	1389	chr1	-	852249	855072	upstream	NM_153254	TTLL10	inactive polyglycylase TTLL10 isoform 2	0.000750884	5.01106	down	chr1	+	1115076	1121243
uc002ubt.1	AK027541	4.78602e-05	9.66434	down	UCSC_knowngene	2013	chr2	+	162101249	162105241	upstream	NM_004180	TANK	TRAF family member-associated NF-kappa-B	9.05e-05	2.4006	up	chr2	+	161993465	162092682
uc002ubt.1	AK027541	4.78602e-05	9.66434	down	UCSC_knowngene	2013	chr2	+	162101249	162105241	downstream	NM_005805	PSMD14	26S proteasome non-ATPase regulatory subunit 14	0.000343	2.03458	up	chr2	+	162164785	162268226
uc002qgt.1	BC131616	0.00218627	3.58674	down	UCSC_knowngene	2014	chr19	+	55219699	55224842	downstream	NM_133277	FCAR	immunoglobulin alpha Fc receptor isoform g	0.00151	2.96864	up	chr19	+	55385548	55401839
uc002qgt.1	BC131616	0.00218627	3.58674	down	UCSC_knowngene	2014	chr19	+	55219699	55224842	downstream	NM_001145458	NCR1	natural cytotoxicity triggering receptor 1	0.0119	2.06483	up	chr19	+	55417507	55424439
uc004aiu.1	AK095210	0.0014432	2.57736	down	UCSC_knowngene	2078	chr9	+	74920351	74958126	downstream	NM_001102420	ZFAND5	AN1-type zinc finger protein 5	3.17e-06	2.84144	up	chr9	-	74966340	74980163
uc004aiu.1	AK095210	0.0014432	2.57736	down	UCSC_knowngene	2078	chr9	+	74920351	74958126	downstream	NM_001102421	ZFAND5	AN1-type zinc finger protein 5	0.000122	3.40871	up	chr9	-	74966340	74980163
NR_026951	C17orf44	0.00452044	2.60847	down	RefSeq_NR	2115	chr17	-	8123948	8127361	upstream	NM_201520	SLC25A35	solute carrier family 25 member 35	7.06006e-05	3.51291	down	chr17	-	8191081	8198170
NR_026951	C17orf44	0.00452044	2.60847	down	RefSeq_NR	2115	chr17	-	8123948	8127361	upstream	NM_016492	RANGRF	ran guanine nucleotide release factor isoform A	5.50867e-05	2.53516	down	chr17	+	8191968	8193409
ENST00000423943	RP11-48O20.4	1.03e-06	8.46551	down	Ensembl	1113	chr1	+	159931013	159948851	upstream	NM_001135050	IGSF9	protein turtle homolog A isoform a	0.00908313	2.21097	down	chr1	-	159896828	159915386
ENST00000416581	RP5-1109J22.2	0.0328544	2.20094	down	Ensembl	1129	chr1	-	46912344	46915376	downstream	NM_005727	TSPAN1	tetraspanin-1	2.56e-06	13.084	down	chr1	+	46640748	46651634
ENST00000416581	RP5-1109J22.2	0.0328544	2.20094	down	Ensembl	1129	chr1	-	46912344	46915376	downstream	NM_001441	FAAH	fatty-acid amide hydrolase 1	2.32871e-05	4.26426	up	chr1	+	46859938	46879520
NR_026951	C17orf44	0.00452044	2.60847	down	RefSeq_NR	2115	chr17	-	8123948	8127361	upstream	NM_030808	NDEL1	nuclear distribution protein nudE-like 1 isoform	1.18e-07	16.1502	down	chr17	+	8339178	8371481
NR_026821	FAM138B	0.000634295	2.12047	down	RefSeq_NR	1130	chr2	+	114334958	114336428	downstream	NM_007082	RABL2A	rab-like protein 2A	8.83638e-05	2.98545	down	chr2	+	114384816	114400975
NR_026821	FAM138B	0.000634295	2.12047	down	RefSeq_NR	1130	chr2	+	114334958	114336428	downstream	NM_025181	SLC35F5	solute carrier family 35 member F5	0.000107	2.13466	up	chr2	-	114471932	114514400
ENST00000452153	AC115989.1	0.026001	4.00803	down	Ensembl	1150	chr17	+	19532763	19537138	upstream	NM_007148	RNF112	RING finger protein 112	1.02e-06	5.74477	down	chr17	+	19314490	19320589
ENST00000452153	AC115989.1	0.026001	4.00803	down	Ensembl	1150	chr17	+	19532763	19537138	downstream	NM_000382	ALDH3A2	fatty aldehyde dehydrogenase isoform 2	0.000258	2.48837	down	chr17	+	19552063	19580908
uc002rbr.2	CR593993	0.00280693	3.5995	down	UCSC_knowngene	1168	chr2	+	11821585	11823451	downstream	NM_145693	LPIN1	phosphatidate phosphatase LPIN1	0.0299863	3.46847	up	chr2	+	11886739	11967533
ENST00000417084	RP11-6J21.2	0.0149584	2.28141	down	Ensembl	917	chr1	+	207422411	207482466	downstream	NM_001877	CR2	complement receptor type 2 isoform 2 precursor	7.62637e-05	43.6164	down	chr1	+	207627644	207663240
ENST00000447557	RP1-287H17.1	0.00816877	4.67732	down	Ensembl	929	chr6	-	135027197	135028487	upstream	NM_001145158	HBS1L	HBS1-like protein isoform 2	0.00373	2.42152	up	chr6	-	135281516	135376036
ENST00000447571	AC079807.4	0.005	8.05097	up	Ensembl	1808	chr2	-	48168834	48468122	upstream	NM_001135629	KLRAQ1	KLRAQ motif-containing protein 1 isoform 1	0.00246	3.06411	up	chr2	+	48667907	48742531
ENST00000379053	RP5-1022P6.6	0.00966815	3.27846	down	Ensembl	1857	chr20	-	5480968	5485259	upstream	NM_152504	C20orf196	hypothetical protein LOC149840	2.47935e-05	3.33446	down	chr20	+	5731042	5844559
ENST00000457725	AP003774.6	0.000597	3.7419	down	Ensembl	985	chr11	-	64161813	64163303	downstream	NM_057092	FKBP2	peptidyl-prolyl cis-trans isomerase FKBP2	1.33e-05	4.95266	down	chr11	+	64009587	64011607
ENST00000457725	AP003774.6	0.000597	3.7419	down	Ensembl	985	chr11	-	64161813	64163303	downstream	NM_032251	CCDC88B	coiled-coil domain-containing protein 88B	0.000644976	8.56786	down	chr11	+	64107689	64125006
uc003qdd.2	AF086187	0.000137402	2.51823	down	UCSC_knowngene	990	chr6	+	132455117	132490502	upstream	NM_006208	ENPP1	ectonucleotide pyrophosphatase/phosphodiesterase	0.000369008	2.83833	down	chr6	+	132129155	132216295
NR_026762	C10orf75	0.000296115	2.49732	up	RefSeq_NR	1003	chr10	+	102133332	102148110	upstream	NM_018294	CWF19L1	CWF19-like protein 1	0.0105	2.33034	up	chr10	-	101992054	102027437
NR_015410	FLJ22536	0.00152	6.01287	up	RefSeq_NR	1904	chr6	+	21666674	22194614	upstream	NM_003107	SOX4	transcription factor SOX-4	7.89e-05	3.9809	up	chr6	+	21593971	21598849
ENST00000326734	FAM87B	2.3e-05	5.28859	up	Ensembl	1944	chr1	+	752750	755214	downstream	NM_005101	ISG15	ubiquitin-like protein ISG15 precursor	2.45152e-06	6.81599	up	chr1	+	948846	949919
ENST00000440578	RP11-356I2.2	3.03035e-05	4.90705	down	Ensembl	1025	chr6	-	138144809	138147031	upstream	NM_006290	TNFAIP3	tumor necrosis factor alpha-induced protein 3	0.00226	2.04225	up	chr6	+	138188580	138204449
ENST00000510784	AL160400.1	0.000316475	2.67985	down	Ensembl	1029	chr6	-	25015180	25042398	downstream	NM_014722	FAM65B	family with sequence similarity 65, member B	0.00129	6.88976	down	chr6	-	24804512	24911195
NR_027341	C9orf44	0.000220406	2.44202	down	RefSeq_NR	2000	chr9	+	94903748	94921890	upstream	NM_006415	SPTLC1	serine palmitoyltransferase 1 isoform a	1.19277e-05	2.11081	up	chr9	-	94793426	94877690
NR_027341	C9orf44	0.000220406	2.44202	down	RefSeq_NR	2000	chr9	+	94903748	94921890	downstream	NM_013417	IARS	isoleucyl-tRNA synthetase, cytoplasmic	0.00635	2.28645	up	chr9	-	94972624	95055972
ENST00000417705	RP11-54O7.3	5.6284e-05	20.4114	down	Ensembl	1389	chr1	-	852249	855072	upstream	NM_021170	HES4	transcription factor HES-4 isoform 2	0.000239	3.43637	up	chr1	-	934341	935552
NR_002724	MBL1P	0.000105118	2.05789	down	RefSeq_NR	1424	chr10	+	81679933	81682875	downstream	NM_025125	C10orf57	transmembrane protein C10orf57	3.99855e-05	2.05816	down	chr10	+	81838425	81852307
ENST00000415195	XXbac-BPG249D20.9	0.0153487	6.61618	down	Ensembl	851	chr6	+	30484042	30486994	downstream	NM_001025091	ABCF1	ATP-binding cassette sub-family F member 1	0.00231	4.32043	up	chr6	+	30539169	30559309
ENST00000415195	XXbac-BPG249D20.9	0.0153487	6.61618	down	Ensembl	851	chr6	+	30484042	30486994	downstream	NM_002714	PPP1R10	serine/threonine-protein phosphatase 1	0.000755	11.9269	up	chr6	-	30568181	30585020
AK058075		0.000745064	4.83962	down	misc_RNA	1555	chr22	-	50226263	50231434	upstream	NM_001164104	MOV10L1	putative helicase Mov10l1 isoform 2	0.0108517	2.10064	down	chr22	+	50528434	50600116
uc002the.2	LOC541471	5.87e-05	2.09802	up	UCSC_knowngene	1583	chr2	-	111965358	112252692	downstream	NM_138621	BCL2L11	bcl-2-like protein 11 isoform 1	0.00436	2.13869	down	chr2	+	111878490	111926022
ENST00000433357	RP11-255A11.21	3.49931e-05	8.35197	down	Ensembl	902	chr9	+	33602498	33605291	downstream	NM_002771	PRSS3	trypsin-3 isoform 2 preproprotein	0.0145412	2.013	down	chr9	+	33795558	33799229
uc001kat.2	CR592318	0.000718978	2.57925	down	UCSC_knowngene	1146	chr10	-	81451255	81586183	upstream	NM_025125	C10orf57	transmembrane protein C10orf57	3.99855e-05	2.05816	down	chr10	+	81838425	81852307
ENST00000433081	RP11-458D21.1	0.000233	2.05383	up	Ensembl	814	chr1	-	145376124	145382397	downstream	NM_001039703	NBPF10	neuroblastoma breakpoint family member 10	0.000314	2.40814	up	chr1	+	145293370	145368684
ENST00000453174	MBL1P1	0.0022	2.36362	up	Ensembl	818	chr10	+	81664653	81691557	downstream	NM_025125	C10orf57	transmembrane protein C10orf57	3.99855e-05	2.05816	down	chr10	+	81838425	81852307
uc002rzk.2	BC043355	4.4849e-05	2.14893	down	UCSC_knowngene	1275	chr2	+	56179292	56408787	upstream	NM_033109	PNPT1	polyribonucleotide nucleotidyltransferase 1,	1.74e-07	10.882	up	chr2	-	55861197	55921011
uc002wrm.1	BC090059	0.00246608	2.00505	down	UCSC_knowngene	1294	chr20	+	19780217	19790937	downstream	NM_001167816	C20orf26	hypothetical protein LOC26074 isoform 2	0.0103	2.3198	up	chr20	+	20037289	20152977
ENST00000426881	RP11-14O19.2	0.00110471	5.32816	down	Ensembl	1013	chr1	-	95821574	95846556	downstream	NM_152487	TMEM56	transmembrane protein 56	2.2e-06	19.6824	down	chr1	+	95582893	95663161
ENST00000442214	AC104654.1	0.00786	2.65084	up	Ensembl	741	chr2	+	42104695	42120186	downstream	NM_019063	EML4	echinoderm microtubule-associated protein-like 4	2.53232e-05	2.5276	down	chr2	+	42396489	42559688
ENST00000468538	RP1-149M18.4	0.00579884	2.61363	down	Ensembl	743	chr6	+	41373556	41374299	upstream	NM_018643	TREM1	triggering receptor expressed on myeloid cells 1	2.32e-06	27.3086	up	chr6	-	41243711	41254457
ENST00000510784	AL160400.1	0.000316475	2.67985	down	Ensembl	1029	chr6	-	25015180	25042398	downstream	NM_015895	GMNN	geminin	5.6e-06	4.37162	up	chr6	+	24775163	24786278
ENST00000449954	AL078621.3	7.85847e-07	7.94961	down	Ensembl	745	chr2	+	114270039	114273062	downstream	NM_013412	RABL2A	rab-like protein 2A	0.000698986	3.16122	down	chr2	+	114384816	114400975
ENST00000437920	RP1-148H17.1	0.000402746	4.878	down	Ensembl	750	chr20	-	46020672	46041071	downstream	NM_172110	EYA2	eyes absent homolog 2 isoform c	0.0001375	2.21253	down	chr20	+	45523262	45817492
ENST00000438217	XX-C2158C12.2	0.000222	2.60998	down	Ensembl	758	chr6	+	171034284	171037576	upstream	NM_001172085	TBP	TATA-box-binding protein isoform 2	0.0077	2.21688	up	chr6	+	170863420	170881958
ENST00000444079	AC093326.3	0.007	4.62979	down	Ensembl	762	chr2	+	558203	578145	upstream	NM_004300	ACP1	low molecular weight phosphotyrosine protein	2.22e-05	2.08171	up	chr2	+	264868	278282
ENST00000444079	AC093326.3	0.007	4.62979	down	Ensembl	762	chr2	+	558203	578145	upstream	NM_007099	ACP1	low molecular weight phosphotyrosine protein	0.000297	3.27213	up	chr2	+	264868	278282
ENST00000417884	RP3-340N1.2	0.000468003	2.01382	down	Ensembl	1083	chr1	+	20480830	20487061	downstream	NM_152376	UBXN10	UBX domain-containing protein 10	0.000149081	451.155	down	chr1	+	20512577	20519942
ENST00000412772	RP11-134P9.3	0.00390526	2.43526	down	Ensembl	775	chr1	+	203256279	203257929	upstream	NM_138391	TMEM183A	transmembrane protein 183A	0.00113	2.02434	up	chr1	+	202976533	202993197
ENST00000412772	RP11-134P9.3	0.00390526	2.43526	down	Ensembl	775	chr1	+	203256279	203257929	downstream	NM_006763	BTG2	protein BTG2	0.000395269	2.53471	down	chr1	+	203274663	203278729
ENST00000420807	RP11-452J13.1	1.8e-05	4.32641	down	Ensembl	779	chr1	+	193273874	193335083	upstream	NM_001173525	TROVE2	60 kDa SS-A/Ro ribonucleoprotein isoform 4	2.19e-05	7.65126	up	chr1	+	193029003	193060906
ENST00000420807	RP11-452J13.1	1.8e-05	4.32641	down	Ensembl	779	chr1	+	193273874	193335083	upstream	NM_024529	CDC73	parafibromin	0.000348	3.88491	up	chr1	+	193091087	193223942
ENST00000423943	RP11-48O20.4	1.03e-06	8.46551	down	Ensembl	1113	chr1	+	159931013	159948851	upstream	NM_001004310	FCRL6	Fc receptor-like protein 6 precursor	0.000268	12.1273	down	chr1	+	159772172	159786047
ENST00000423943	RP11-48O20.4	1.03e-06	8.46551	down	Ensembl	1113	chr1	+	159931013	159948851	upstream	NM_020789	IGSF9	protein turtle homolog A isoform b	0.00245853	2.0118	down	chr1	-	159896828	159915386
ENST00000423943	RP11-48O20.4	1.03e-06	8.46551	down	Ensembl	1113	chr1	+	159931013	159948851	downstream	NM_000702	ATP1A2	sodium/potassium-transporting ATPase subunit	1.88582e-06	17.7696	down	chr1	+	160085519	160113374
ENST00000423943	RP11-48O20.4	1.03e-06	8.46551	down	Ensembl	1113	chr1	+	159931013	159948851	downstream	NM_002857	PEX19	peroxisomal biogenesis factor 19 isoform a	3.02e-05	4.98832	up	chr1	-	160246598	160254941
ENST00000438722	AC018737.3	0.00339566	4.44311	down	Ensembl	794	chr2	+	122548019	122554278	upstream	NM_004622	TSN	translin	0.000204	2.82133	up	chr2	+	122513120	122525428
ENST00000416581	RP5-1109J22.2	0.0328544	2.20094	down	Ensembl	1129	chr1	-	46912344	46915376	downstream	NM_003579	RAD54L	DNA repair and recombination protein RAD54-like	0.0106	8.21604	up	chr1	+	46713366	46744145
NR_026821	FAM138B	0.000634295	2.12047	down	RefSeq_NR	1130	chr2	+	114334958	114336428	downstream	NM_013412	RABL2A	rab-like protein 2A	0.000698986	3.16122	down	chr2	+	114384816	114400975
ENST00000449457	RP11-445P17.8	0.00361	3.63734	down	Ensembl	692	chr10	-	5307995	5313199	downstream	NM_001818	AKR1C4	aldo-keto reductase family 1 member C4	2.81e-06	13.2213	down	chr10	+	5238797	5260910
ENST00000449457	RP11-445P17.8	0.00361	3.63734	down	Ensembl	692	chr10	-	5307995	5313199	upstream	NM_005863	NET1	neuroepithelial cell-transforming gene 1 protein	8.81e-06	8.62445	up	chr10	+	5488545	5500426
ENST00000449713	AP001065.15	0.000280622	2.4045	down	Ensembl	912	chr21	+	45905459	45910171	upstream	NM_004928	C21orf2	hypothetical protein LOC755	0.000287357	2.4394	down	chr21	-	45748826	45759285
ENST00000417084	RP11-6J21.2	0.0149584	2.28141	down	Ensembl	917	chr1	+	207422411	207482466	upstream	NM_001018053	PFKFB2	6-phosphofructo-2-kinase/fructose-2,	0.000513	2.0555	down	chr1	+	207226619	207254368
ENST00000411780	RP11-425M5.5	0.000443493	3.33985	down	Ensembl	714	chr20	-	36120873	36137633	downstream	NM_001003897	MANBAL	protein MANBAL	0.00616	2.98133	up	chr20	+	35918050	35945663
ENST00000447557	RP1-287H17.1	0.00816877	4.67732	down	Ensembl	929	chr6	-	135027197	135028487	upstream	NM_006620	HBS1L	HBS1-like protein isoform 1	0.00085	2.95027	up	chr6	-	135281516	135376036
ENST00000457725	AP003774.6	0.000597	3.7419	down	Ensembl	985	chr11	-	64161813	64163303	downstream	NM_031471	FERMT3	fermitin family homolog 3 short form	0.000546	3.07187	down	chr11	+	63974151	63991363
ENST00000457725	AP003774.6	0.000597	3.7419	down	Ensembl	985	chr11	-	64161813	64163303	downstream	NM_003377	VEGFB	vascular endothelial growth factor B precursor	5.74e-05	2.01975	down	chr11	+	64002265	64006259
ENST00000457725	AP003774.6	0.000597	3.7419	down	Ensembl	985	chr11	-	64161813	64163303	downstream	NM_004470	FKBP2	peptidyl-prolyl cis-trans isomerase FKBP2	0.0292	2.24836	down	chr11	+	64008412	64011607
ENST00000457725	AP003774.6	0.000597	3.7419	down	Ensembl	985	chr11	-	64161813	64163303	downstream	NM_001177358	GPR137	integral membrane protein GPR137 isoform 5	0.00728	2.52368	up	chr11	+	64052282	64056972
ENST00000457725	AP003774.6	0.000597	3.7419	down	Ensembl	985	chr11	-	64161813	64163303	downstream	NM_001170880	GPR137	integral membrane protein GPR137 isoform 2	5.52e-06	2.20622	up	chr11	+	64053581	64056972
ENST00000457725	AP003774.6	0.000597	3.7419	down	Ensembl	985	chr11	-	64161813	64163303	upstream	NM_153378	SLC22A12	solute carrier family 22 member 12 isoform b	0.0174	2.59957	down	chr11	+	64358281	64369820
NR_026762	C10orf75	0.000296115	2.49732	up	RefSeq_NR	1003	chr10	+	102133332	102148110	downstream	NM_003393	WNT8B	protein Wnt-8b precursor	0.00273216	2.18642	down	chr10	+	102222811	102243399
NR_015395	LOC541471	0.00889	2.63529	up	RefSeq_NR	809	chr2	-	112124590	112252692	downstream	NM_207002	BCL2L11	bcl-2-like protein 11 isoform 9	6.60465e-05	6.18781	up	chr2	+	111878490	111886423
ENST00000441790	RP11-392O17.1	0.0115988	2.43006	down	Ensembl	811	chr1	-	219583022	219585283	downstream	NM_138794	LYPLAL1	lysophospholipase-like protein 1	4.6e-06	2.6598	up	chr1	+	219347191	219386207
ENST00000433081	RP11-458D21.1	0.000233	2.05383	up	Ensembl	814	chr1	-	145376124	145382397	upstream	NM_006472	TXNIP	thioredoxin-interacting protein	2.45024e-06	2.75261	down	chr1	+	145438461	145442628
ENST00000433081	RP11-458D21.1	0.000233	2.05383	up	Ensembl	814	chr1	-	145376124	145382397	upstream	NM_032305	POLR3GL	DNA-directed RNA polymerase III subunit	0.000186285	2.08461	down	chr1	-	145456235	145470387
ENST00000431157	RP11-354E11.2	7.04902e-05	24.2387	down	Ensembl	823	chr10	-	20010625	20017479	upstream	NM_032812	PLXDC2	plexin domain-containing protein 2 precursor	0.000104	2.78461	up	chr10	+	20105371	20569115
ENST00000433572	RP11-542K23.7	0.0113	2.34376	down	Ensembl	830	chr9	+	125165685	125211256	upstream	NM_033117	RBM18	probable RNA-binding protein 18	8.54e-05	2.26136	up	chr9	-	125001833	125027143
ENST00000445963	RP11-395E19.7	0.000406337	74.6622	down	Ensembl	847	chr9	-	40740775	40742447	upstream	NM_033160	ZNF658	zinc finger protein 658	7.23324e-05	2.03347	up	chr9	-	40771401	40792112
ENST00000450216	CTA-150C2.13	0.000840184	2.19736	down	Ensembl	678	chr22	+	39317231	39320713	upstream	NM_020243	TOMM22	mitochondrial import receptor subunit TOM22	0.000149	3.18546	up	chr22	+	39077953	39080766
ENST00000448058	RP11-17H4.2	1.83e-05	8.47053	down	Ensembl	597	chr1	-	231727037	231747836	downstream	NM_022051	EGLN1	egl nine homolog 1	5.46e-05	3.31668	up	chr1	-	231499496	231560790
ENST00000454160	RP11-54A22.2	0.018584	2.07514	down	Ensembl	599	chr9	+	137519675	137521252	downstream	NM_004108	FCN2	ficolin-2 isoform a precursor	0.000735108	8.82503	down	chr9	+	137772657	137779366
ENST00000447453	AC078941.1	0.00474422	2.20056	down	Ensembl	750	chr2	-	67351801	67405124	upstream	NM_019002	ETAA1	ewing's tumor-associated antigen 1	0.000482	3.41111	up	chr2	+	67624441	67637533
ENST00000412772	RP11-134P9.3	0.00390526	2.43526	down	Ensembl	775	chr1	+	203256279	203257929	upstream	NM_000674	ADORA1	adenosine receptor A1	6.19e-07	26.8996	down	chr1	+	203096835	203136533
ENST00000412772	RP11-134P9.3	0.00390526	2.43526	down	Ensembl	775	chr1	+	203256279	203257929	upstream	NM_001276	CHI3L1	chitinase-3-like protein 1 precursor	6.45e-05	21.7398	up	chr1	-	203148058	203155922
ENST00000455966	RP1-224A6.3	0.00219602	2.26196	down	Ensembl	615	chr1	-	22350486	22351461	upstream	NM_044472	CDC42	cell division control protein 42 homolog isoform	0.00023	2.26531	down	chr1	+	22379119	22417296
ENST00000420807	RP11-452J13.1	1.8e-05	4.32641	down	Ensembl	779	chr1	+	193273874	193335083	upstream	NM_001042369	TROVE2	60 kDa SS-A/Ro ribonucleoprotein isoform 1	5.11e-05	5.59578	up	chr1	+	193029003	193060906
ENST00000420807	RP11-452J13.1	1.8e-05	4.32641	down	Ensembl	779	chr1	+	193273874	193335083	upstream	NM_001042370	TROVE2	60 kDa SS-A/Ro ribonucleoprotein isoform 3	4.12e-05	3.02002	up	chr1	+	193029003	193060906
ENST00000427890	RP11-101P17.6	4.05542e-06	7.68273	up	Ensembl	621	chr13	+	21834167	21867568	upstream	NM_005870	SAP18	histone deacetylase complex subunit SAP18	3.02456e-05	2.51681	down	chr13	+	21714652	21723224
ENST00000427890	RP11-101P17.6	4.05542e-06	7.68273	up	Ensembl	621	chr13	+	21834167	21867568	upstream	NM_024026	MRP63	ribosomal protein 63, mitochondrial	0.000609	2.31559	down	chr13	+	21750371	21753220
ENST00000442197	AL132709.9	0.0106	3.1708	up	Ensembl	625	chr14	+	101427363	101433377	upstream	NM_003836	DLK1	protein delta homolog 1 precursor	0.00358244	2.48873	down	chr14	+	101193201	101201467
ENST00000414488	AL132709.5	0.00833	3.27485	up	Ensembl	800	chr14	+	101415314	101424887	upstream	NM_003836	DLK1	protein delta homolog 1 precursor	0.00358244	2.48873	down	chr14	+	101193201	101201467
ENST00000451118	WI2-85898F10.1	0.0022958	2.79719	down	Ensembl	805	chr22	-	46271878	46283628	downstream	NM_001167621	ATXN10	ataxin-10 isoform 2	4.39e-05	3.41253	up	chr22	+	46067677	46241187
ENST00000425089	RP11-524H19.2	0.0013	3.10766	up	Ensembl	586	chr6	-	54704915	54705653	upstream	NM_001010872	FAM83B	hypothetical protein LOC222584	3.86e-05	2.96664	up	chr6	+	54711568	54806819
ENST00000452181	RP1-90G24.6	0.0101548	5.3544	down	Ensembl	590	chr22	+	32669406	32673173	upstream	NM_001159546	RFPL2	ret finger protein-like 2 isoform 3	5.4753e-06	3.757	down	chr22	-	32586421	32598537
ENST00000449457	RP11-445P17.8	0.00361	3.63734	down	Ensembl	692	chr10	-	5307995	5313199	downstream	NM_001353	AKR1C1	aldo-keto reductase family 1 member C1	3.46594e-07	39.5143	down	chr10	+	5005453	5020158
ENST00000449457	RP11-445P17.8	0.00361	3.63734	down	Ensembl	692	chr10	-	5307995	5313199	downstream	NM_003739	AKR1C3	aldo-keto reductase family 1 member C3	1.42e-05	6.74947	down	chr10	+	5136567	5149878
ENST00000451066	AC009473.1	1.64128e-05	4.41277	down	Ensembl	692	chr7	-	7989483	7990340	upstream	NM_138426	GLCCI1	glucocorticoid-induced transcript 1 protein	0.000109554	3.87643	down	chr7	+	8008422	8128709
ENST00000432530	RP11-258F22.1	0.00165419	2.65283	down	Ensembl	712	chr10	-	38064298	38073059	upstream	NM_021045	ZNF248	zinc finger protein 248	0.00197697	2.28805	up	chr10	-	38117898	38146486
ENST00000411780	RP11-425M5.5	0.000443493	3.33985	down	Ensembl	714	chr20	-	36120873	36137633	downstream	NM_001135771	RPN2	dolichyl-diphosphooligosaccharide--protein	9.09e-05	3.1772	up	chr20	+	35807455	35870025
ENST00000411780	RP11-425M5.5	0.000443493	3.33985	down	Ensembl	714	chr20	-	36120873	36137633	downstream	NM_002951	RPN2	dolichyl-diphosphooligosaccharide--protein	6.47e-05	2.05206	up	chr20	+	35807455	35870025
ENST00000451101	AC019172.2	0.0014196	8.62695	down	Ensembl	717	chr2	+	3891773	3895001	upstream	NM_018436	ALLC	probable allantoicase isoform a	0.000130953	2.67721	down	chr2	+	3705785	3750260
ENST00000450860	RP5-1091N2.9	0.0002181	4.32125	down	Ensembl	726	chrX	-	70403408	70418025	downstream	NM_001025265	CXorf65	hypothetical protein LOC158830	1.02e-05	19.6818	down	chrX	-	70323738	70326638
ENST00000450860	RP5-1091N2.9	0.0002181	4.32125	down	Ensembl	726	chrX	-	70403408	70418025	downstream	NM_005120	MED12	mediator of RNA polymerase II transcription	0.00178514	5.91537	down	chrX	+	70338405	70362304
ENST00000450860	RP5-1091N2.9	0.0002181	4.32125	down	Ensembl	726	chrX	-	70403408	70418025	upstream	NM_001145409	NONO	non-POU domain-containing octamer-binding	0.00394	5.27975	up	chrX	+	70503041	70521018
ENST00000450860	RP5-1091N2.9	0.0002181	4.32125	down	Ensembl	726	chrX	-	70403408	70418025	upstream	NM_004606	TAF1	transcription initiation factor TFIID subunit 1	8.70477e-06	2.07405	down	chrX	+	70586113	70685855
ENST00000426204	RP11-202G18.1	0.00113082	6.27337	up	Ensembl	744	chr9	-	113901525	114047116	upstream	NM_001146108	PTGR1	prostaglandin reductase 1 isoform 1	1.46e-05	2.51311	down	chr9	-	114325246	114362135
ENST00000448327	RP11-345L23.1	3.61892e-06	11.8279	down	Ensembl	566	chr6	+	53493177	53496192	upstream	NM_021814	ELOVL5	elongation of very long chain fatty acids	0.000195	3.36317	up	chr6	-	53132195	53213942
ENST00000446884	RP1-30G7.2	3.74069e-05	2.75984	down	Ensembl	626	chrX	-	46185358	46187080	upstream	NM_001129899	ZNF673	protein ZNF673 isoform 3	0.000315	2.95257	up	chrX	+	46306623	46334074
uc001lln.2	AF086154	0.0105772	2.21361	down	UCSC_knowngene	632	chr10	-	134325131	134331695	downstream	NM_001143757	LRRC27	leucine-rich repeat-containing protein 27	0.00538	2.58215	down	chr10	+	134145740	134195010
ENST00000452336	RP4-530I15.6	0.0101322	5.52362	down	Ensembl	638	chr20	+	49262007	49276828	downstream	NM_015339	ADNP	activity-dependent neuroprotector homeobox	6.82e-06	4.63735	up	chr20	-	49506882	49547527
ENST00000450216	CTA-150C2.13	0.000840184	2.19736	down	Ensembl	678	chr22	+	39317231	39320713	downstream	NM_004900	APOBEC3B	probable DNA dC->dU-editing enzyme APOBEC-3B	0.000198	3.63393	up	chr22	+	39378404	39388783
ENST00000450216	CTA-150C2.13	0.000840184	2.19736	down	Ensembl	678	chr22	+	39317231	39320713	downstream	NM_014508	APOBEC3C	probable DNA dC->dU-editing enzyme APOBEC-3C	1.30704e-05	3.10249	up	chr22	+	39410264	39414825
ENST00000450216	CTA-150C2.13	0.000840184	2.19736	down	Ensembl	678	chr22	+	39317231	39320713	downstream	NM_001166003	APOBEC3H	DNA dC->dU-editing enzyme APOBEC-3H isoform 1	0.000668	2.98447	up	chr22	+	39493228	39500072
ENST00000450671	RP3-475N16.1	0.011035	2.36506	down	Ensembl	679	chr6	+	42908101	42911708	upstream	NM_198486	RPL7L1	60S ribosomal protein L7-like 1	0.000188	3.04361	up	chr6	+	42847670	42854731
ENST00000450671	RP3-475N16.1	0.011035	2.36506	down	Ensembl	679	chr6	+	42908101	42911708	upstream	NM_138296	PTCRA	pre T-cell antigen receptor alpha precursor	1.48723e-07	24.5194	down	chr6	+	42883726	42893575
ENST00000450671	RP3-475N16.1	0.011035	2.36506	down	Ensembl	679	chr6	+	42908101	42911708	downstream	NM_057161	KLHDC3	kelch domain-containing protein 3 isoform 1	0.000255	4.0479	up	chr6	+	42981976	42989031
ENST00000450671	RP3-475N16.1	0.011035	2.36506	down	Ensembl	679	chr6	+	42908101	42911708	downstream	NM_032538	TTBK1	tau-tubulin kinase 1	0.000122	3.65954	up	chr6	+	43211221	43255997
ENST00000391359	RP1-122K4.3	0.00127491	12.2074	down	Ensembl	544	chrX	-	13998184	14006939	downstream	NM_001001994	GPM6B	neuronal membrane glycoprotein M6-b isoform 4	0.00278058	2.39796	down	chrX	-	13792092	13956831
ENST00000448058	RP11-17H4.2	1.83e-05	8.47053	down	Ensembl	597	chr1	-	231727037	231747836	downstream	NM_032018	C1orf124	zinc finger RAD18 domain-containing protein	0.000239	2.2388	up	chr1	+	231473681	231489989
ENST00000454160	RP11-54A22.2	0.018584	2.07514	down	Ensembl	599	chr9	+	137519675	137521252	downstream	NM_015837	FCN2	ficolin-2 isoform b precursor	1.36e-05	6.3536	up	chr9	+	137772657	137779366
NR_026816	PSORS1C3	5.96083e-05	3.33464	down	RefSeq_NR	600	chr6	-	31141511	31145676	downstream	NM_001010909	MUC21	mucin-21 precursor	5.68e-06	13.4532	down	chr6	+	30951484	30957675
NR_026816	PSORS1C3	5.96083e-05	3.33464	down	RefSeq_NR	600	chr6	-	31141511	31145676	downstream	NM_014070	C6orf15	STG protein precursor	0.00783631	3.27377	down	chr6	-	31078999	31080332
NR_026816	PSORS1C3	5.96083e-05	3.33464	down	RefSeq_NR	600	chr6	-	31141511	31145676	downstream	NM_014068	PSORS1C1	psoriasis susceptibility 1 candidate 1	0.000700499	2.18992	down	chr6	+	31082607	31107869
ENST00000422405	RP11-318G21.3	0.0180086	4.25989	down	Ensembl	601	chr13	+	78402356	78408085	upstream	NM_003843	SCEL	sciellin isoform 2	0.000274022	5.25172	down	chr13	+	78109808	78219398
ENST00000447883	RP11-277L2.3	2.30405e-05	2.90445	down	Ensembl	561	chr1	-	149576590	149577296	upstream	NM_000566	FCGR1A	high affinity immunoglobulin gamma Fc receptor I	4.48444e-06	15.9186	up	chr1	+	149754249	149764074
ENST00000447883	RP11-277L2.3	2.30405e-05	2.90445	down	Ensembl	561	chr1	-	149576590	149577296	upstream	NM_001005464	HIST2H3A	histone H3.2	0.000672	6.08045	up	chr1	+	149824180	149824687
ENST00000447883	RP11-277L2.3	2.30405e-05	2.90445	down	Ensembl	561	chr1	-	149576590	149577296	upstream	NM_003517	HIST2H2AC	histone H2A type 2-C	3.39e-05	5.44815	up	chr1	+	149858524	149858961
ENST00000444862	AP005273.1	0.000428231	3.51908	down	Ensembl	522	chr11	+	64268324	64272858	upstream	NM_031471	FERMT3	fermitin family homolog 3 short form	0.000546	3.07187	down	chr11	+	63974151	63991363
ENST00000444862	AP005273.1	0.000428231	3.51908	down	Ensembl	522	chr11	+	64268324	64272858	upstream	NM_032251	CCDC88B	coiled-coil domain-containing protein 88B	0.000644976	8.56786	down	chr11	+	64107689	64125006
ENST00000441085	RP11-98G7.1	0.00589	3.89807	up	Ensembl	523	chr1	-	156416203	156426258	downstream	NM_199173	BGLAP	osteocalcin preproprotein	0.000243487	3.22724	up	chr1	+	156211950	156213123
ENST00000441085	RP11-98G7.1	0.00589	3.89807	up	Ensembl	523	chr1	-	156416203	156426258	upstream	NM_021948	BCAN	brevican core protein isoform 1	0.00502967	2.45728	down	chr1	+	156611739	156629320
ENST00000454185	RP11-568A7.3	0.000179924	31.3018	down	Ensembl	579	chr6	-	167650995	167653968	downstream	NM_031409	CCR6	C-C chemokine receptor type 6	2.34e-05	9.84353	down	chr6	+	167536240	167552629
ENST00000437830	XX-CR54.1	0.00994044	2.06595	down	Ensembl	580	chr1	+	248855491	248862411	upstream	NM_001004697	OR2T5	olfactory receptor 2T5	0.00489776	2.03966	down	chr1	+	248651889	248652837
ENST00000453787	RP11-151D14.1	0.00207	2.20609	down	Ensembl	583	chr9	-	75486643	75489025	upstream	NM_000700	ANXA1	annexin A1	9.29587e-08	5.38887	down	chr9	+	75766780	75785307
uc001hpx.2	BC032899	0.00605	4.50848	up	UCSC_knowngene	502	chr1	+	226271655	226277990	upstream	NM_001130440	SRP9	signal recognition particle 9 kDa protein	0.00112	3.40519	up	chr1	+	225965514	225978168
uc001hpx.2	BC032899	0.00605	4.50848	up	UCSC_knowngene	502	chr1	+	226271655	226277990	downstream	NM_031944	MIXL1	homeobox protein MIXL1	0.000207	2.4052	down	chr1	+	226411382	226413513
ENST00000448282	RP1-102H19.6	0.00338	4.32775	up	Ensembl	542	chr6	+	88081310	88102519	upstream	NM_198568	GJB7	gap junction beta-7 protein	4.10324e-05	29.9922	down	chr6	-	87992696	88038996
ENST00000414795	AC017076.5	0.00219	3.9715	up	Ensembl	506	chr2	-	6969010	6980595	upstream	NM_014746	RNF144A	probable E3 ubiquitin-protein ligase RNF144A	0.00408	3.04418	down	chr2	+	7057522	7184309
ENST00000451464	AC108868.6	0.0346247	2.20124	down	Ensembl	511	chr2	+	107159469	107160753	downstream	NM_001142352	ST6GAL2	beta-galactoside alpha-2,6-sialyltransferase 2	0.00406	2.37118	up	chr2	-	107429531	107503563
ENST00000444464	AC084809.3	9.70599e-05	4.57946	down	Ensembl	512	chr17	+	31232679	31233602	downstream	NM_173847	SPACA3	sperm acrosome membrane-associated protein 3	0.000670754	2.81744	down	chr17	+	31318881	31324892
ENST00000446107	RP11-168P8.3	0.00362182	4.84511	down	Ensembl	513	chr10	+	44407891	44409684	upstream	NM_145312	ZNF485	zinc finger protein 485	0.00109	2.17833	up	chr10	+	44101854	44113352
ENST00000423568	RP11-556O15.1	0.000696068	17.9627	down	Ensembl	517	chr6	+	6993423	6995787	downstream	NM_001168344	RREB1	ras-responsive element-binding protein 1 isoform	8.79648e-05	6.82584	down	chr6	+	7107829	7252213
ENST00000437646	AC004448.2	0.000346578	5.1846	down	Ensembl	520	chr17	+	19322347	19327670	upstream	NM_007148	RNF112	RING finger protein 112	1.02e-06	5.74477	down	chr17	+	19314490	19320589
ENST00000437646	AC004448.2	0.000346578	5.1846	down	Ensembl	520	chr17	+	19322347	19327670	downstream	NM_000382	ALDH3A2	fatty aldehyde dehydrogenase isoform 2	0.000258	2.48837	down	chr17	+	19552063	19580908
ENST00000424705	RP3-461P17.10	0.000146769	2.90197	down	Ensembl	514	chr20	+	44076041	44076982	downstream	NM_006103	WFDC2	WAP four-disulfide core domain protein 2	8.65757e-07	17.2513	down	chr20	+	44098393	44110172
ENST00000424705	RP3-461P17.10	0.000146769	2.90197	down	Ensembl	514	chr20	+	44076041	44076982	downstream	NM_080827	WFDC6	WAP four-disulfide core domain protein 6	8.2e-07	18.7528	down	chr20	-	44162835	44168134
ENST00000412060	Z83851.1	0.00128773	2.11508	down	Ensembl	475	chr22	-	42760407	42765214	downstream	NM_033318	C22orf32	hypothetical protein LOC91689 precursor	0.00029806	2.46907	down	chr22	+	42475698	42480288
ENST00000412060	Z83851.1	0.00128773	2.11508	down	Ensembl	475	chr22	-	42760407	42765214	upstream	NM_014509	SERHL2	serine hydrolase-like protein 2	0.0198247	2.27337	down	chr22	+	42949924	42970388
ENST00000444862	AP005273.1	0.000428231	3.51908	down	Ensembl	522	chr11	+	64268324	64272858	upstream	NM_003377	VEGFB	vascular endothelial growth factor B precursor	5.74e-05	2.01975	down	chr11	+	64002265	64006259
ENST00000444862	AP005273.1	0.000428231	3.51908	down	Ensembl	522	chr11	+	64268324	64272858	upstream	NM_004470	FKBP2	peptidyl-prolyl cis-trans isomerase FKBP2	0.0292	2.24836	down	chr11	+	64008412	64011607
ENST00000444862	AP005273.1	0.000428231	3.51908	down	Ensembl	522	chr11	+	64268324	64272858	upstream	NM_057092	FKBP2	peptidyl-prolyl cis-trans isomerase FKBP2	1.33e-05	4.95266	down	chr11	+	64009587	64011607
ENST00000444862	AP005273.1	0.000428231	3.51908	down	Ensembl	522	chr11	+	64268324	64272858	upstream	NM_001170880	GPR137	integral membrane protein GPR137 isoform 2	5.52e-06	2.20622	up	chr11	+	64053581	64056972
ENST00000444862	AP005273.1	0.000428231	3.51908	down	Ensembl	522	chr11	+	64268324	64272858	upstream	NM_001039496	C11orf20	hypothetical protein LOC25858	0.000610645	4.41806	down	chr11	+	64067862	64072239
ENST00000444862	AP005273.1	0.000428231	3.51908	down	Ensembl	522	chr11	+	64268324	64272858	upstream	NM_001006944	RPS6KA4	ribosomal protein S6 kinase alpha-4 isoform b	0.000476	2.31079	up	chr11	+	64126624	64139687
ENST00000441085	RP11-98G7.1	0.00589	3.89807	up	Ensembl	523	chr1	-	156416203	156426258	downstream	NM_001008800	CCT3	T-complex protein 1 subunit gamma isoform c	9.21e-06	4.79008	up	chr1	-	156278751	156308206
ENST00000441085	RP11-98G7.1	0.00589	3.89807	up	Ensembl	523	chr1	-	156416203	156426258	upstream	NM_024540	MRPL24	39S ribosomal protein L24, mitochondrial	0.00036	2.00505	up	chr1	-	156707093	156710923
ENST00000412797	RP11-70P17.1	2.62952e-05	9.12495	down	Ensembl	483	chr1	+	25907968	25916847	upstream	NM_015627	LDLRAP1	low density lipoprotein receptor adapter protein	8.22414e-05	5.86896	down	chr1	+	25870075	25895377
ENST00000446145	RP11-239E10.3	0.00104	4.94351	up	Ensembl	487	chr1	+	223354485	223361496	downstream	NM_001037175	SUSD4	sushi domain-containing protein 4 isoform b	8.5e-06	3.86107	up	chr1	-	223408251	223537544
ENST00000458170	RP11-69A21.2	0.00790241	2.82262	up	Ensembl	451	chrX	-	72027258	72028044	upstream	NM_001012977	PABPC1L2A	polyadenylate-binding protein 1-like 2	0.00623762	4.8884	down	chrX	-	72297176	72299351
ENST00000412797	RP11-70P17.1	2.62952e-05	9.12495	down	Ensembl	483	chr1	+	25907968	25916847	downstream	NM_024037	C1orf135	aurora A-binding protein	0.00219	2.40053	up	chr1	-	26160496	26185848
ENST00000420876	RP11-511I2.2	0.000470146	5.11442	down	Ensembl	483	chr1	-	47846599	47874149	downstream	NM_001048166	STIL	SCL-interrupting locus protein isoform 1	0.00115	9.10111	up	chr1	-	47715810	47779819
ENST00000424084	RP4-799D16.1	0.0324	2.9248	down	Ensembl	490	chr1	-	25370197	25439610	upstream	NM_015484	SYF2	pre-mRNA-splicing factor SYF2 isoform 1	0.000135	2.00875	down	chr1	-	25548766	25559013
ENST00000416507	RP11-787B4.2	0.0410761	2.00912	down	Ensembl	509	chr9	+	118774639	118775244	downstream	NM_002581	PAPPA	pappalysin-1 preproprotein	0.00104	4.22887	up	chr9	+	118916070	119164600
uc010nxz.1	FLJ39609	0.02315	2.01049	down	UCSC_knowngene	436	chr1	-	852952	854817	upstream	NM_021170	HES4	transcription factor HES-4 isoform 2	0.000239	3.43637	up	chr1	-	934341	935552
ENST00000415138	AC097495.2	0.03144	2.25136	down	Ensembl	436	chr2	+	69059175	69064840	downstream	NM_018153	ANTXR1	anthrax toxin receptor 1 isoform 3 precursor	0.0163	2.01355	up	chr2	+	69240275	69373496
ENST00000457239	RP11-71G12.1	9.36e-06	11.5433	down	Ensembl	471	chr1	+	157155177	157157195	upstream	NM_001080471	PEAR1	platelet endothelial aggregation receptor 1	0.00026	2.09127	down	chr1	+	156863522	156886226
ENST00000450255	RP1-140K8.1	0.0396856	9.39764	down	Ensembl	441	chr6	+	3893359	3894524	downstream	NM_003913	PRPF4B	serine/threonine-protein kinase PRP4 homolog	0.000343	3.07112	up	chr6	+	4021568	4065217
ENST00000414875	RP1-153P14.5	0.000389	4.35838	down	Ensembl	442	chr6	+	37517779	37518636	upstream	NM_183078	RNF8	E3 ubiquitin-protein ligase RNF8 isoform 2	9.56e-05	3.23205	up	chr6	+	37321747	37362514
ENST00000438185	LL22NC03-102D1.18	0.0029785	2.15206	down	Ensembl	451	chr22	-	23035262	23035797	downstream	NM_199127	GGTLC2	gamma-glutamyltransferase light chain 2 isoform	0.000125	2.54831	down	chr22	+	22988781	22990368
ENST00000438185	LL22NC03-102D1.18	0.0029785	2.15206	down	Ensembl	451	chr22	-	23035262	23035797	upstream	NM_001178126	IGLL5	immunoglobulin lambda-like polypeptide 5	1.14e-05	16.3669	down	chr22	+	23229959	23238013
ENST00000447956	RP11-128M1.1	1.47704e-05	105.581	down	Ensembl	415	chr20	+	2187862	2193797	upstream	NM_001040023	SIRPA	tyrosine-protein phosphatase non-receptor type	0.0275045	2.48122	down	chr20	+	1875825	1920540
ENST00000447956	RP11-128M1.1	1.47704e-05	105.581	down	Ensembl	415	chr20	+	2187862	2193797	upstream	NM_080836	STK35	serine/threonine-protein kinase 35	0.0390773	2.83286	up	chr20	+	2082527	2129198
ENST00000414923	RP11-153F1.2	0.00161286	2.37066	down	Ensembl	418	chr1	+	103957500	103968087	downstream	NM_001008219	AMY1C	alpha-amylase 1 precursor	3.27e-07	69.0036	down	chr1	-	104230040	104238911
ENST00000424162	RP1-60O19.2	0.000155	23.8837	down	Ensembl	419	chr6	+	107143409	107147869	downstream	NM_001142470	C6orf203	hypothetical protein LOC51250 isoform b	0.000539	2.6346	up	chr6	+	107349406	107372547
uc001fuu.2	AF088076	0.0113	2.45427	down	UCSC_knowngene	423	chr1	+	159931073	159946734	upstream	NM_001004310	FCRL6	Fc receptor-like protein 6 precursor	0.000268	12.1273	down	chr1	+	159772172	159786047
uc001fuu.2	AF088076	0.0113	2.45427	down	UCSC_knowngene	423	chr1	+	159931073	159946734	upstream	NM_001135050	IGSF9	protein turtle homolog A isoform a	0.00908313	2.21097	down	chr1	-	159896828	159915386
uc001fuu.2	AF088076	0.0113	2.45427	down	UCSC_knowngene	423	chr1	+	159931073	159946734	upstream	NM_020789	IGSF9	protein turtle homolog A isoform b	0.00245853	2.0118	down	chr1	-	159896828	159915386
ENST00000419428	RP11-356N1.2	0.000402	2.67003	up	Ensembl	432	chr1	+	108614103	108617141	downstream	NM_001143989	NBPF4	neuroblastoma breakpoint family, member 4	0.00927	2.65626	down	chr1	-	108765962	108786703
ENST00000418403	RP11-462G2.1	0.00105015	3.03503	down	Ensembl	397	chr6	+	71104589	71109120	downstream	NM_020819	FAM135A	hypothetical protein LOC57579 isoform b	4.64e-05	3.451	up	chr6	+	71123106	71270877
ENST00000424162	RP1-60O19.2	0.000155	23.8837	down	Ensembl	419	chr6	+	107143409	107147869	upstream	NM_001624	AIM1	absent in melanoma 1 protein	0.00109	2.77451	up	chr6	+	106959729	107018334
ENST00000444744	RP11-428O18.4	0.000120239	2.39564	down	Ensembl	420	chr13	-	27810418	27810948	upstream	NM_002097	GTF3A	transcription factor IIIA	0.000248658	2.41808	down	chr13	+	27998680	28009846
uc001fuu.2	AF088076	0.0113	2.45427	down	UCSC_knowngene	423	chr1	+	159931073	159946734	downstream	NM_002857	PEX19	peroxisomal biogenesis factor 19 isoform a	3.02e-05	4.98832	up	chr1	-	160246598	160254941
ENST00000443719	RP11-101P17.10	0.00317936	2.64068	down	Ensembl	405	chr13	+	21808706	21809343	upstream	NM_024026	MRP63	ribosomal protein 63, mitochondrial	0.000609	2.31559	down	chr13	+	21750371	21753220
ENST00000419428	RP11-356N1.2	0.000402	2.67003	up	Ensembl	432	chr1	+	108614103	108617141	upstream	NM_006113	VAV3	guanine nucleotide exchange factor VAV3 isoform	0.00789732	2.28973	down	chr1	-	108113781	108507545
uc010nxz.1	FLJ39609	0.02315	2.01049	down	UCSC_knowngene	436	chr1	-	852952	854817	upstream	NM_152486	SAMD11	sterile alpha motif domain-containing protein	0.000565153	6.25666	down	chr1	+	861120	879961
uc010nxz.1	FLJ39609	0.02315	2.01049	down	UCSC_knowngene	436	chr1	-	852952	854817	upstream	NM_198576	AGRN	agrin precursor	5.09e-05	2.58116	up	chr1	+	955502	991492
ENST00000415138	AC097495.2	0.03144	2.25136	down	Ensembl	436	chr2	+	69059175	69064840	upstream	NM_138964	PROKR1	prokineticin receptor 1	0.0311646	2.44463	down	chr2	+	68872953	68882708
ENST00000450255	RP1-140K8.1	0.0396856	9.39764	down	Ensembl	441	chr6	+	3893359	3894524	upstream	NM_183373	C6orf145	PX domain-containing protein C6orf145	0.000809	2.40606	up	chr6	-	3722835	3752246
ENST00000416242	RP11-143M1.4	0.0104644	3.20447	down	Ensembl	413	chr9	-	112715	113754	upstream	NM_203447	DOCK8	dedicator of cytokinesis protein 8 isoform 1	0.00103168	3.53115	down	chr9	+	214864	465259
ENST00000440492	RP11-288L9.1	0.000513	10.1136	up	Ensembl	441	chr1	-	27986838	27989233	downstream	NM_004672	MAP3K6	mitogen-activated protein kinase kinase kinase	1.13389e-05	2.07745	down	chr1	-	27681669	27693337
ENST00000440492	RP11-288L9.1	0.000513	10.1136	up	Ensembl	441	chr1	-	27986838	27989233	upstream	NM_002038	IFI6	interferon alpha-inducible protein 6 isoform a	0.00329611	13.4634	up	chr1	-	27992571	27998724
ENST00000415726	RP11-336K24.5	0.0269654	4.02359	down	Ensembl	401	chr1	+	155961180	155971578	downstream	NM_199173	BGLAP	osteocalcin preproprotein	0.000243487	3.22724	up	chr1	+	156211950	156213123
ENST00000443719	RP11-101P17.10	0.00317936	2.64068	down	Ensembl	405	chr13	+	21808706	21809343	upstream	NM_005870	SAP18	histone deacetylase complex subunit SAP18	3.02456e-05	2.51681	down	chr13	+	21714652	21723224
ENST00000419064	RP11-13P5.2	0.00127	2.72144	up	Ensembl	385	chr6	+	159586940	159588385	downstream	NM_032532	FNDC1	fibronectin type III domain-containing protein	2.10107e-07	13.9484	up	chr6	+	159590428	159693140
ENST00000451438	RP11-168L22.2	0.0112787	2.59108	down	Ensembl	391	chr10	+	43819112	43823380	upstream	NM_018590	CSGALNACT2	chondroitin sulfate	0.00161	3.12273	up	chr10	+	43633933	43680749
ENST00000415509	RP11-338O1.2	0.0282146	2.73801	down	Ensembl	416	chr10	-	125185228	125187156	upstream	NM_153442	GPR26	G-protein coupled receptor 26	8.12e-05	3.35599	down	chr10	+	125425870	125456913
ENST00000414923	RP11-153F1.2	0.00161286	2.37066	down	Ensembl	418	chr1	+	103957500	103968087	downstream	NM_020978	AMY2B	alpha-amylase 2B precursor	1.4023e-07	70.0954	down	chr1	+	104097321	104122149
ENST00000414923	RP11-153F1.2	0.00161286	2.37066	down	Ensembl	418	chr1	+	103957500	103968087	downstream	NM_000699	AMY2A	pancreatic alpha-amylase precursor	1.13214e-07	79.6613	down	chr1	+	104159998	104168400
ENST00000448198	XXbac-BPG254F23.7	0.00291421	6.67086	down	Ensembl	381	chr6	+	32685781	32686604	downstream	NM_020056	HLA-DQA2	HLA class II histocompatibility antigen, DQ	0.000905	11.3162	down	chr6	+	32709162	32714664
ENST00000427911	AP000281.2	1.01766e-05	2.26282	down	Ensembl	384	chr21	-	34216676	34222244	upstream	NM_138983	OLIG1	oligodendrocyte transcription factor 1	0.00212948	3.55186	down	chr21	+	34442449	34444728
ENST00000451438	RP11-168L22.2	0.0112787	2.59108	down	Ensembl	391	chr10	+	43819112	43823380	upstream	NM_145313	RASGEF1A	ras-GEF domain-containing family member 1A	0.00606738	2.36408	down	chr10	-	43689983	43762367
ENST00000429980	RP11-143M1.2	0.0136272	2.12986	down	Ensembl	394	chr9	+	72700	88826	downstream	NM_203447	DOCK8	dedicator of cytokinesis protein 8 isoform 1	0.00103168	3.53115	down	chr9	+	214864	465259
ENST00000418403	RP11-462G2.1	0.00105015	3.03503	down	Ensembl	397	chr6	+	71104589	71109120	upstream	NM_001858	COL19A1	collagen alpha-1(XIX) chain precursor	0.000156	15.4692	up	chr6	+	70576447	70922157
ENST00000435493	C21orf130	0.0150426	2.7949	down	Ensembl	349	chr21	-	42515068	42519350	upstream	NM_058186	FAM3B	cytokine-like protein 2-21 isoform a	0.000412042	2.48553	down	chr21	+	42688660	42729654
ENST00000455247	RP5-1109J22.3	0.00146921	2.17751	down	Ensembl	354	chr1	+	46921494	46948147	upstream	NM_001441	FAAH	fatty-acid amide hydrolase 1	2.32871e-05	4.26426	up	chr1	+	46859938	46879520
HIT000395572		0.0112378	2.47295	down	H-invDB	354	chr1	-	200443206	200443559	downstream	NM_003822	NR5A2	nuclear receptor subfamily 5 group A member 2	0.0223502	3.20571	down	chr1	+	199996769	200146550
HIT000395572		0.0112378	2.47295	down	H-invDB	354	chr1	-	200443206	200443559	upstream	NM_203459	CAMSAP1L1	calmodulin-regulated spectrin-associated protein	2.6e-05	5.20314	up	chr1	+	200708685	200829831
ENST00000434938	NCRNA00106	0.00048267	2.02087	down	Ensembl	357	chrX	-	1515319	1517852	downstream	NM_006140	CSF2RA	granulocyte-macrophage colony-stimulating factor	0.000351928	2.26271	down	chrX	+	1387692	1428828
ENST00000434938	NCRNA00106	0.00048267	2.02087	down	Ensembl	357	chrX	-	1515319	1517852	downstream	NM_172245	CSF2RA	granulocyte-macrophage colony-stimulating factor	0.000549277	2.35514	down	chrX	+	1387692	1428828
ENST00000455247	RP5-1109J22.3	0.00146921	2.17751	down	Ensembl	354	chr1	+	46921494	46948147	upstream	NM_003579	RAD54L	DNA repair and recombination protein RAD54-like	0.0106	8.21604	up	chr1	+	46713366	46744145
ENST00000416924	RP11-484I6.6	0.000104152	2.88857	down	Ensembl	361	chr13	+	103532285	103533517	upstream	NM_017693	BIVM	basic immunoglobulin-like variable	0.000418	4.77606	up	chr13	+	103451398	103493888
ENST00000434938	NCRNA00106	0.00048267	2.02087	down	Ensembl	357	chrX	-	1515319	1517852	upstream	NM_178129	P2RY8	P2Y purinoceptor 8	4.75e-07	16.5786	down	chrX	-	1581465	1656037
ENST00000272546	RP11-143M1.7	0.0189	2.54222	down	Ensembl	369	chr9	-	52452	73344	upstream	NM_203447	DOCK8	dedicator of cytokinesis protein 8 isoform 1	0.00103168	3.53115	down	chr9	+	214864	465259
ENST00000422894	RP5-894D12.3	0.00225626	7.31136	down	Ensembl	318	chr6	+	170584461	170588557	downstream	NM_001172085	TBP	TATA-box-binding protein isoform 2	0.0077	2.21688	up	chr6	+	170863420	170881958
ENST00000425322	AC006041.1	0.0229316	4.40787	down	Ensembl	328	chr7	-	15880921	15881985	downstream	NM_001004320	AGMO	alkylglycerol monooxygenase	1.14e-05	17.7078	up	chr7	-	15239942	15601640
ENST00000446887	RP1-111C20.3	0.0280204	4.20072	down	Ensembl	331	chr6	-	159485759	159486305	upstream	NM_032532	FNDC1	fibronectin type III domain-containing protein	2.10107e-07	13.9484	up	chr6	+	159590428	159693140
ENST00000440750	RP11-534L6.2	0.0056293	3.92352	down	Ensembl	335	chr10	-	49872243	49880469	downstream	NM_002750	MAPK8	mitogen-activated protein kinase 8 isoform JNK1	0.0012255	4.49445	down	chr10	+	49609686	49643183
ENST00000446290	RP11-274B18.2	0.0038	4.02005	up	Ensembl	338	chr9	-	71158456	71161505	downstream	NM_021965	PGM5	phosphoglucomutase-like protein 5	0.0243483	3.38404	down	chr9	+	70971814	71145977
ENST00000432331	RP11-478K15.1	8.3459e-06	2.11445	down	Ensembl	340	chr13	-	44680513	44711372	upstream	NM_001010897	SERP2	stress-associated endoplasmic reticulum protein	0.0336964	2.05743	down	chr13	+	44947977	44971850
ENST00000454647	C18orf20	0.000836085	2.19685	down	Ensembl	339	chr18	-	61747535	61765844	downstream	NM_002575	SERPINB2	plasminogen activator inhibitor 2 precursor	1.80871e-06	27.396	down	chr18	+	61554938	61571124
ENST00000369027	RP11-10J18.3	0.0131	2.30972	up	Ensembl	266	chr9	+	127277216	127278335	upstream	NM_001166170	NEK6	serine/threonine-protein kinase Nek6 isoform 2	0.00688473	2.54212	up	chr9	+	127054249	127114719
uc004dgl.1	BC015977	0.00401787	6.64785	down	UCSC_knowngene	271	chrX	-	46185713	46187080	upstream	NM_001129899	ZNF673	protein ZNF673 isoform 3	0.000315	2.95257	up	chrX	+	46306623	46334074
ENST00000426547	RP11-524K22.1	0.0438941	2.05236	down	Ensembl	285	chr6	+	50481747	50488817	downstream	NM_003221	TFAP2B	transcription factor AP-2-beta	0.000669813	10.0327	up	chr6	+	50786438	50815326
ENST00000444515	C1orf46	0.000470605	18.2976	down	Ensembl	302	chr1	+	152627952	152629280	downstream	NM_178430	LCE2D	late cornified envelope protein 2D	0.000312	4.13562	down	chr1	+	152635871	152637135
ENST00000444515	C1orf46	0.000470605	18.2976	down	Ensembl	302	chr1	+	152627952	152629280	downstream	NM_178353	LCE1E	late cornified envelope protein 1E	0.000359	2.73719	up	chr1	+	152758752	152760901
ENST00000444515	C1orf46	0.000470605	18.2976	down	Ensembl	302	chr1	+	152627952	152629280	downstream	NM_005547	IVL	involucrin	9.58e-06	402.427	down	chr1	+	152881038	152884362
ENST00000442526	RP11-517P14.2	0.00464	3.50272	up	Ensembl	303	chr10	+	43916046	43917254	upstream	NM_145313	RASGEF1A	ras-GEF domain-containing family member 1A	0.00606738	2.36408	down	chr10	-	43689983	43762367
ENST00000444515	C1orf46	0.000470605	18.2976	down	Ensembl	302	chr1	+	152627952	152629280	upstream	NM_016190	CRNN	cornulin	0.00342209	6.71663	down	chr1	-	152381718	152386750
ENST00000444515	C1orf46	0.000470605	18.2976	down	Ensembl	302	chr1	+	152627952	152629280	upstream	NM_178433	LCE3B	late cornified envelope protein 3B	0.00599087	2.9926	down	chr1	+	152586286	152586574
ENST00000444515	C1orf46	0.000470605	18.2976	down	Ensembl	302	chr1	+	152627952	152629280	downstream	NM_178429	LCE2C	late cornified envelope protein 2C	0.00126	5.41364	down	chr1	+	152647770	152649049
ENST00000444515	C1orf46	0.000470605	18.2976	down	Ensembl	302	chr1	+	152627952	152629280	downstream	NM_014357	LCE2B	late cornified envelope protein 2B	0.000793	4.67063	down	chr1	+	152658598	152659876
ENST00000419514	RP11-366O17.2	0.000132	29.8249	up	Ensembl	192	chr13	+	43385972	43386428	upstream	NM_182508	C13orf30	hypothetical protein LOC144809	9.78627e-06	73.8128	down	chr13	+	43355685	43365685
ENST00000419514	RP11-366O17.2	0.000132	29.8249	up	Ensembl	192	chr13	+	43385972	43386428	downstream	NM_001002264	EPSTI1	epithelial-stromal interaction protein 1 isoform	2.09e-05	8.88592	up	chr13	-	43462121	43566377
ENST00000446733	RP11-550C4.6	0.00126	2.46937	down	Ensembl	197	chr6	-	47697562	47708477	downstream	NM_012120	CD2AP	CD2-associated protein	0.000489	2.081	up	chr6	+	47445524	47594996
ENST00000419514	RP11-366O17.2	0.000132	29.8249	up	Ensembl	192	chr13	+	43385972	43386428	downstream	NM_033255	EPSTI1	epithelial-stromal interaction protein 1 isoform	1.93e-06	4.38922	up	chr13	-	43462121	43566377
ENST00000434255	RP1-32B1.4	0.0135912	2.17765	up	Ensembl	216	chr6	+	135581133	135582071	upstream	NM_001145158	HBS1L	HBS1-like protein isoform 2	0.00373	2.42152	up	chr6	-	135281516	135376036
ENST00000434255	RP1-32B1.4	0.0135912	2.17765	up	Ensembl	216	chr6	+	135581133	135582071	upstream	NM_001161658	MYB	transcriptional activator Myb isoform 6	0.00317	2.32483	up	chr6	+	135502452	135540311
ENST00000434255	RP1-32B1.4	0.0135912	2.17765	up	Ensembl	216	chr6	+	135581133	135582071	upstream	NM_001161659	MYB	transcriptional activator Myb isoform 7	0.000653855	2.83933	up	chr6	+	135502452	135540311
ENST00000434255	RP1-32B1.4	0.0135912	2.17765	up	Ensembl	216	chr6	+	135581133	135582071	upstream	NM_006620	HBS1L	HBS1-like protein isoform 1	0.00085	2.95027	up	chr6	-	135281516	135376036
ENST00000369027	RP11-10J18.3	0.0131	2.30972	up	Ensembl	266	chr9	+	127277216	127278335	upstream	NM_001166168	NEK6	serine/threonine-protein kinase Nek6 isoform 2	0.0269	2.06945	up	chr9	+	127020529	127114719

## Sheet: M3 vs T2
# Condition pairs: M3vs T2 # Fold Change cut-off: 2.0 This table contains the differentially expressed enhancer-like LncRNAs and their nearby coding genes (distance < 300 kb). # Column A: seqname, the sequence identifier. # Column B: GeneSymbol, the symbol of the LncRNA. # Column C: Fold change - LncRNAs, the ratio of normalized intensities between two samples, positive value indicates up-regulat…
seqname	GeneSymbol	Fold change - LncRNAs	Log Fold change - LncRNAs	Absolute Fold change - LncRNAs	Regulation - LncRNAs	source	RNAlength	Chrom	Strand	txStart	txEnd	GenomeRelationship	NearbyGene	NearbyGeneSymbol	NearbyProteinName	Fold change - mRNAs	Log Fold change - mRNAs	Absolute Fold change - mRNAs	Regulation - mRNAs	NearbyGeneChrom	NearbyGeneStrand	NearbyGenetxStart	NearbyGenetxEnd
ENST00000429998	RP11-513I15.6	-2.08062	-1.05702	2.08062	down	Ensembl	4785	chr6	+	34247481	34252266	upstream	NM_145902	HMGA1	high mobility group protein HMG-I/HMG-Y isoform	3.90662	1.96592	3.90662	up	chr6	+	34204649	34214008
ENST00000429998	RP11-513I15.6	-2.08062	-1.05702	2.08062	down	Ensembl	4785	chr6	+	34247481	34252266	downstream	NM_012391	SPDEF	SAM pointed domain-containing Ets transcription	-4.69754	-2.2319	4.69754	down	chr6	-	34505579	34524091
uc002khh.2	LOC388312	2.72376	1.4456	2.72376	up	UCSC_knowngene	4812	chr1	-	661139	679736	downstream	NM_001005221	OR4F29	olfactory receptor 4F3/4F16/4F29	-4.50176	-2.17049	4.50176	down	chr1	+	367658	368597
uc002khh.2	LOC388312	2.72376	1.4456	2.72376	up	UCSC_knowngene	4812	chr1	-	661139	679736	upstream	NM_198576	AGRN	agrin precursor	2.49674	1.32005	2.49674	up	chr1	+	955502	991492
NR_026790	HCG11	2.34289	1.22829	2.34289	up	RefSeq_NR	5688	chr6	+	26521933	26527610	upstream	NM_003532	HIST1H3E	histone H3.1	4.12928	2.04589	4.12928	up	chr6	+	26225382	26225844
NR_026790	HCG11	2.34289	1.22829	2.34289	up	RefSeq_NR	5688	chr6	+	26521933	26527610	upstream	NM_003524	HIST1H2BH	histone H2B type 1-H	7.72648	2.94981	7.72648	up	chr6	+	26251878	26252303
NR_026790	HCG11	2.34289	1.22829	2.34289	up	RefSeq_NR	5688	chr6	+	26521933	26527610	upstream	NM_197974	BTN3A3	butyrophilin subfamily 3 member A3 isoform b	2.45537	1.29594	2.45537	up	chr6	+	26440699	26453643
ENST00000434868	RP1-90L6.2	-9.21945	-3.20468	9.21945	down	Ensembl	6043	chr22	+	27254596	27261749	upstream	NM_001886	CRYBA4	beta-crystallin A4	-6.20108	-2.63252	6.20108	down	chr22	+	27017927	27026636
ENST00000450248	TUG1	3.39841	1.76486	3.39841	up	Ensembl	6477	chr22	+	31365642	31374831	upstream	NM_030758	OSBP2	oxysterol-binding protein 2 isoform a	8.62354	3.10828	8.62354	up	chr22	+	31090792	31303811
ENST00000450248	TUG1	3.39841	1.76486	3.39841	up	Ensembl	6477	chr22	+	31365642	31374831	downstream	NM_134269	SMTN	smoothelin isoform b	3.6043	1.84972	3.6043	up	chr22	+	31477304	31500609
ENST00000450248	TUG1	3.39841	1.76486	3.39841	up	Ensembl	6477	chr22	+	31365642	31374831	downstream	NM_134270	SMTN	smoothelin isoform a	3.28502	1.7159	3.28502	up	chr22	+	31477304	31500609
uc003ojj.2	CR624291	-2.01563	-1.01123	2.01563	down	UCSC_knowngene	2513	chr6	-	34247456	34249969	upstream	NM_012391	SPDEF	SAM pointed domain-containing Ets transcription	-4.69754	-2.2319	4.69754	down	chr6	-	34505579	34524091
AK026168		2.00275	1.00199	2.00275	up	NRED	2638	chr6	-	34247460	34250085	downstream	NM_145902	HMGA1	high mobility group protein HMG-I/HMG-Y isoform	3.90662	1.96592	3.90662	up	chr6	+	34204649	34214008
AK026168		2.00275	1.00199	2.00275	up	NRED	2638	chr6	-	34247460	34250085	upstream	NM_012391	SPDEF	SAM pointed domain-containing Ets transcription	-4.69754	-2.2319	4.69754	down	chr6	-	34505579	34524091
ENST00000417443	NCRNA00086	-3.41868	-1.77344	3.41868	down	Ensembl	2913	chrX	+	134555867	134559682	downstream	NM_182540	DDX26B	protein DDX26B	-2.39538	-1.26026	2.39538	down	chrX	+	134654554	134716460
ENST00000450520	RP11-216M21.7	-3.59178	-1.8447	3.59178	down	Ensembl	3200	chr9	-	42363047	42367092	upstream	NM_001012421	ANKRD20A2	ankyrin repeat domain 20 family, member A2	6.55493	2.71258	6.55493	up	chr9	+	42368302	42411410
ENST00000447720	KB-1183D5.13	-4.64442	-2.2155	4.64442	down	Ensembl	3215	chr22	-	21655278	21679331	upstream	NM_001128635	RIMBP3B	RIMS-binding protein 3B	-3.29224	-1.71907	3.29224	down	chr22	+	21738039	21743455
ENST00000412266	AC006028.9	-2.05859	-1.04166	2.05859	down	Ensembl	3288	chr7	-	2757466	2762622	downstream	NM_025250	TTYH3	protein tweety homolog 3	2.21058	1.14443	2.21058	up	chr7	+	2671602	2704436
NR_033370	LOC63930	-3.65208	-1.86872	3.65208	down	RefSeq_NR	3366	chr20	+	61640734	61716423	upstream	NM_001853	COL9A3	collagen alpha-3(IX) chain precursor	-4.35149	-2.12151	4.35149	down	chr20	+	61448413	61472511
NR_027029	MGC34034	-3.39994	-1.76551	3.39994	down	RefSeq_NR	3517	chr6	+	134142284	134175130	upstream	NM_004100	EYA4	eyes absent homolog 4 isoform a	4.72972	2.24175	4.72972	up	chr6	+	133562494	133853258
ENST00000442382	RP4-781K5.6	-2.6783	-1.42132	2.6783	down	Ensembl	3564	chr1	-	234805268	234831900	downstream	NM_001012985	C1orf31	hypothetical protein LOC388753 isoform 1	2.08584	1.06063	2.08584	up	chr1	+	234509428	234519795
uc002xid.1	AX746690	2.04402	1.03141	2.04402	up	UCSC_knowngene	2002	chr20	-	37034659	37045444	upstream	NM_020336	RALGAPB	ral GTPase-activating protein subunit beta	7.97941	2.99628	7.97941	up	chr20	+	37101485	37207504
uc002qgt.1	BC131616	-4.58407	-2.19663	4.58407	down	UCSC_knowngene	2014	chr19	+	55219699	55224842	downstream	NM_001080770	KIR2DL4	killer cell immunoglobulin-like receptor 2DL4	2.95604	1.56367	2.95604	up	chr19	+	55315066	55325972
uc004aiu.1	AK095210	-2.88112	-1.52663	2.88112	down	UCSC_knowngene	2078	chr9	+	74920351	74958126	upstream	NM_004293	GDA	guanine deaminase isoform b	-6.74624	-2.75408	6.74624	down	chr9	+	74764292	74867140
uc002sdy.1	AK123766	-49.412	-5.62679	49.412	down	UCSC_knowngene	2100	chr2	-	67350488	67442451	upstream	NM_019002	ETAA1	ewing's tumor-associated antigen 1	2.76357	1.46653	2.76357	up	chr2	+	67624441	67637533
NR_026951	C17orf44	-2.23202	-1.15835	2.23202	down	RefSeq_NR	2115	chr17	-	8123948	8127361	upstream	NM_001177802	RANGRF	ran guanine nucleotide release factor isoform C	-2.78306	-1.47667	2.78306	down	chr17	+	8191968	8193409
NR_026951	C17orf44	-2.23202	-1.15835	2.23202	down	RefSeq_NR	2115	chr17	-	8123948	8127361	upstream	NM_001146684	RNF222	RING finger protein 222	-14.3122	-3.83918	14.3122	down	chr17	-	8294022	8301144
uc002qym.1	AK124409	-2.26783	-1.18131	2.26783	down	UCSC_knowngene	2130	chr2	-	6869300	6910442	upstream	NM_014746	RNF144A	probable E3 ubiquitin-protein ligase RNF144A	-2.91652	-1.54425	2.91652	down	chr2	+	7057522	7184309
ENST00000430364	XXbac-BPG181B23.4	2.0543	1.03865	2.0543	up	Ensembl	2141	chr6	+	31409443	31414750	downstream	NM_001011700	MCCD1	mitochondrial coiled-coil domain protein 1	-3.38759	-1.76026	3.38759	down	chr6	+	31496738	31498008
ENST00000430364	XXbac-BPG181B23.4	2.0543	1.03865	2.0543	up	Ensembl	2141	chr6	+	31409443	31414750	downstream	NM_000594	TNF	tumor necrosis factor	-8.05285	-3.0095	8.05285	down	chr6	+	31543349	31546112
ENST00000430364	XXbac-BPG181B23.4	2.0543	1.03865	2.0543	up	Ensembl	2141	chr6	+	31409443	31414750	downstream	NM_205837	LST1	leukocyte-specific transcript 1 protein isoform	-4.77633	-2.2559	4.77633	down	chr6	+	31554475	31556686
ENST00000430364	XXbac-BPG181B23.4	2.0543	1.03865	2.0543	up	Ensembl	2141	chr6	+	31409443	31414750	downstream	NM_147130	NCR3	natural cytotoxicity triggering receptor 3	-15.1309	-3.91943	15.1309	down	chr6	-	31556659	31560762
ENST00000439050	AC009299.3	-12.0188	-3.58723	12.0188	down	Ensembl	2333	chr2	+	162101249	162105561	upstream	NM_133484	TANK	TRAF family member-associated NF-kappa-B	2.13813	1.09635	2.13813	up	chr2	+	161993465	162061490
ENST00000439050	AC009299.3	-12.0188	-3.58723	12.0188	down	Ensembl	2333	chr2	+	162101249	162105561	upstream	NM_004180	TANK	TRAF family member-associated NF-kappa-B	2.4423	1.28824	2.4423	up	chr2	+	161993465	162092682
ENST00000399543	AC025171.1	-2.18073	-1.12481	2.18073	down	Ensembl	2423	chr5	+	43042194	43045492	downstream	NM_003432	ZNF131	zinc finger protein 131	4.03142	2.01129	4.03142	up	chr5	+	43121641	43175823
NR_026883	HSPC072	2.25153	1.17091	2.25153	up	RefSeq_NR	1574	chr20	-	18768614	18775228	downstream	NM_006363	SEC23B	protein transport protein Sec23B isoform 1	2.104	1.07313	2.104	up	chr20	+	18488187	18542050
NR_024464	LOC100188949	-5.59236	-2.48346	5.59236	down	RefSeq_NR	1589	chr13	-	30914408	30948036	upstream	NM_005800	USPL1	ubiquitin-specific peptidase-like protein 1	2.00103	1.00074	2.00103	up	chr13	+	31191829	31233686
NR_027036	LOC100271722	-2.05654	-1.04022	2.05654	down	RefSeq_NR	1625	chr22	-	46435788	46440748	downstream	NM_001167621	ATXN10	ataxin-10 isoform 2	3.61395	1.85357	3.61395	up	chr22	+	46067677	46241187
NR_033376	NCRNA00222	-2.04861	-1.03464	2.04861	down	RefSeq_NR	1753	chr6	+	109072856	109091145	downstream	NM_032131	ARMC2	armadillo repeat-containing protein 2	-17.1896	-4.10346	17.1896	down	chr6	+	109169618	109295352
uc011djk.1	FLJ22536	12.1103	3.59817	12.1103	up	UCSC_knowngene	1806	chr6	+	21668877	22194614	upstream	NM_003107	SOX4	transcription factor SOX-4	3.61823	1.85528	3.61823	up	chr6	+	21593971	21598849
ENST00000416805	RP11-413E1.3	-3.30556	-1.72489	3.30556	down	Ensembl	1835	chr1	+	90229103	90235462	downstream	NM_182975	ZNF326	zinc finger protein 326 isoform 3	6.19188	2.63038	6.19188	up	chr1	+	90460677	90472000
ENST00000416805	RP11-413E1.3	-3.30556	-1.72489	3.30556	down	Ensembl	1835	chr1	+	90229103	90235462	downstream	NM_182976	ZNF326	zinc finger protein 326 isoform 1	3.12492	1.64382	3.12492	up	chr1	+	90460677	90494094
uc002rqj.1	AK057187	-3.16615	-1.66273	3.16615	down	UCSC_knowngene	1889	chr2	-	38053389	38056541	upstream	NM_000104	CYP1B1	cytochrome P450 1B1	3.70534	1.88961	3.70534	up	chr2	-	38294745	38303323
ENST00000326734	FAM87B	4.91233	2.29641	4.91233	up	Ensembl	1944	chr1	+	752750	755214	downstream	NM_198576	AGRN	agrin precursor	2.49674	1.32005	2.49674	up	chr1	+	955502	991492
AK055023		-2.23883	-1.16274	2.23883	down	misc_RNA	1974	chr10	-	72689681	72695453	downstream	NM_080722	ADAMTS14	A disintegrin and metalloproteinase with	6.75147	2.7552	6.75147	up	chr10	+	72432558	72522195
ENST00000457273	RP11-475O6.1	2.14993	1.10429	2.14993	up	Ensembl	1991	chr1	-	84267198	84326229	upstream	NM_207578	PRKACB	cAMP-dependent protein kinase catalytic subunit	-3.05505	-1.6112	3.05505	down	chr1	+	84543744	84670979
ENST00000457273	RP11-475O6.1	2.14993	1.10429	2.14993	up	Ensembl	1991	chr1	-	84267198	84326229	upstream	NM_002731	PRKACB	cAMP-dependent protein kinase catalytic subunit	7.42495	2.89238	7.42495	up	chr1	+	84543744	84704181
ENST00000450408	RP3-355C18.7	2.67719	1.42072	2.67719	up	Ensembl	1016	chr22	+	50427792	50431528	downstream	NM_002969	MAPK12	mitogen-activated protein kinase 12	2.89753	1.53482	2.89753	up	chr22	-	50691330	50700089
ENST00000366185	RP11-258C19.5	6.37109	2.67154	6.37109	up	Ensembl	1063	chrX	+	53123338	53171889	upstream	NM_018969	GPR173	probable G-protein coupled receptor 173	3.65596	1.87025	3.65596	up	chrX	+	53078505	53109796
ENST00000366185	RP11-258C19.5	6.37109	2.67154	6.37109	up	Ensembl	1063	chrX	+	53123338	53171889	downstream	NM_001031745	RIBC1	RIB43A-like with coiled-coils protein 1 isoform	-24.4975	-4.61456	24.4975	down	chrX	+	53449889	53458057
ENST00000423943	RP11-48O20.4	-8.26514	-3.04704	8.26514	down	Ensembl	1113	chr1	+	159931013	159948851	upstream	NM_003564	TAGLN2	transgelin-2	4.37538	2.12941	4.37538	up	chr1	-	159887902	159895284
ENST00000452153	AC115989.1	-4.07233	-2.02586	4.07233	down	Ensembl	1150	chr17	+	19532763	19537138	downstream	NM_001031806	ALDH3A2	fatty aldehyde dehydrogenase isoform 1	-2.00856	-1.00616	2.00856	down	chr17	+	19552063	19580904
CR591832		-3.06506	-1.61592	3.06506	down	misc_RNA	1228	chr1	-	234794726	234795953	downstream	NM_001012985	C1orf31	hypothetical protein LOC388753 isoform 1	2.08584	1.06063	2.08584	up	chr1	+	234509428	234519795
ENST00000417705	RP11-54O7.3	-23.9421	-4.58148	23.9421	down	Ensembl	1389	chr1	-	852249	855072	upstream	NM_152486	SAMD11	sterile alpha motif domain-containing protein	-4.54638	-2.18472	4.54638	down	chr1	+	861120	879961
ENST00000417705	RP11-54O7.3	-23.9421	-4.58148	23.9421	down	Ensembl	1389	chr1	-	852249	855072	upstream	NM_032129	PLEKHN1	pleckstrin homology domain-containing family N	-2.04493	-1.03205	2.04493	down	chr1	+	901876	910484
ENST00000417705	RP11-54O7.3	-23.9421	-4.58148	23.9421	down	Ensembl	1389	chr1	-	852249	855072	upstream	NM_198576	AGRN	agrin precursor	2.49674	1.32005	2.49674	up	chr1	+	955502	991492
ENST00000433572	RP11-542K23.7	-2.51824	-1.33242	2.51824	down	Ensembl	830	chr9	+	125165685	125211256	upstream	NM_198469	MORN5	MORN repeat-containing protein 5	-752.452	-9.55546	752.452	down	chr9	+	124922189	124962367
ENST00000433572	RP11-542K23.7	-2.51824	-1.33242	2.51824	down	Ensembl	830	chr9	+	125165685	125211256	upstream	NM_001173512	MRRF	ribosome-recycling factor, mitochondrial isoform	2.23218	1.15845	2.23218	up	chr9	+	125026881	125085742
uc002tkz.1	CR601322	-4.02896	-2.01041	4.02896	down	UCSC_knowngene	844	chr2	+	114737145	114764879	upstream	NM_025181	SLC35F5	solute carrier family 35 member F5	2.22237	1.1521	2.22237	up	chr2	-	114471932	114514400
ENST00000432701	RP11-269C23.3	-2.6172	-1.38802	2.6172	down	Ensembl	858	chr13	-	44974486	44980002	downstream	NM_001010897	SERP2	stress-associated endoplasmic reticulum protein	-2.86536	-1.51871	2.86536	down	chr13	+	44947977	44971850
uc001hwk.3	BC016972	-2.93109	-1.55144	2.93109	down	UCSC_knowngene	886	chr1	-	235093091	235099746	upstream	NM_001161533	RBM34	RNA-binding protein 34 isoform 2	3.48311	1.80037	3.48311	up	chr1	-	235315802	235324571
ENST00000449713	AP001065.15	-2.16209	-1.11243	2.16209	down	Ensembl	912	chr21	+	45905459	45910171	upstream	NM_013369	DNMT3L	DNA (cytosine-5)-methyltransferase 3-like	105.143	6.71621	105.143	up	chr21	-	45666222	45682099
ENST00000449713	AP001065.15	-2.16209	-1.11243	2.16209	down	Ensembl	912	chr21	+	45905459	45910171	downstream	NM_198691	KRTAP10-1	keratin-associated protein 10-1	-3.28501	-1.7159	3.28501	down	chr21	-	45959067	45960078
ENST00000449713	AP001065.15	-2.16209	-1.11243	2.16209	down	Ensembl	912	chr21	+	45905459	45910171	downstream	NM_198690	KRTAP10-9	keratin-associated protein 10-9	-2.89748	-1.5348	2.89748	down	chr21	+	46047039	46048295
ENST00000449713	AP001065.15	-2.16209	-1.11243	2.16209	down	Ensembl	912	chr21	+	45905459	45910171	downstream	NM_181688	KRTAP10-10	keratin-associated protein 10-10	2.97433	1.57257	2.97433	up	chr21	+	46057272	46058372
ENST00000417084	RP11-6J21.2	-3.37843	-1.75635	3.37843	down	Ensembl	917	chr1	+	207422411	207482466	downstream	NM_001114752	CD55	complement decay-accelerating factor isoform 2	-3.09207	-1.62857	3.09207	down	chr1	+	207494816	207534311
ENST00000417084	RP11-6J21.2	-3.37843	-1.75635	3.37843	down	Ensembl	917	chr1	+	207422411	207482466	downstream	NM_001006658	CR2	complement receptor type 2 isoform 1 precursor	-25.0016	-4.64395	25.0016	down	chr1	+	207627644	207663240
ENST00000417084	RP11-6J21.2	-3.37843	-1.75635	3.37843	down	Ensembl	917	chr1	+	207422411	207482466	downstream	NM_000573	CR1	complement receptor type 1 isoform F precursor	-2.55061	-1.35084	2.55061	down	chr1	+	207669472	207815110
ENST00000432296	RP11-31E23.1	-3.48783	-1.80233	3.48783	down	Ensembl	930	chr1	-	198776786	198906539	downstream	NM_002838	PTPRC	receptor-type tyrosine-protein phosphatase C	-3.01015	-1.58983	3.01015	down	chr1	+	198608136	198726545
ENST00000450750	RP4-754E20__A.5	2.3406	1.22688	2.3406	up	Ensembl	951	chr22	+	43796336	43805687	upstream	NM_173050	SCUBE1	signal peptide, CUB and EGF-like	-2.14071	-1.09809	2.14071	down	chr22	-	43599229	43739355
BC042185		2.27537	1.1861	2.27537	up	RNAdb	964	chr9	+	35646266	35647470	downstream	NM_014450	SIT1	signaling threshold-regulating transmembrane	-12.4077	-3.63316	12.4077	down	chr9	-	35649296	35650947
BC042185		2.27537	1.1861	2.27537	up	RNAdb	964	chr9	+	35646266	35647470	downstream	NM_001012446	C9orf128	hypothetical protein LOC392307	-5.23461	-2.38808	5.23461	down	chr9	-	35817013	35828744
uc001uzl.2	BC025370	-31.2197	-4.96439	31.2197	down	UCSC_knowngene	976	chr13	-	44974387	44980021	downstream	NM_001010897	SERP2	stress-associated endoplasmic reticulum protein	-2.86536	-1.51871	2.86536	down	chr13	+	44947977	44971850
ENST00000457725	AP003774.6	-4.03372	-2.01211	4.03372	down	Ensembl	985	chr11	-	64161813	64163303	downstream	NM_001039496	C11orf20	hypothetical protein LOC25858	-5.50038	-2.45953	5.50038	down	chr11	+	64067862	64072239
ENST00000457725	AP003774.6	-4.03372	-2.01211	4.03372	down	Ensembl	985	chr11	-	64161813	64163303	downstream	NM_001006944	RPS6KA4	ribosomal protein S6 kinase alpha-4 isoform b	2.49356	1.3182	2.49356	up	chr11	+	64126624	64139687
ENST00000451101	AC019172.2	-10.7104	-3.42094	10.7104	down	Ensembl	717	chr2	+	3891773	3895001	upstream	NM_001011	RPS7	40S ribosomal protein S7	4.86472	2.28236	4.86472	up	chr2	+	3622852	3628509
ENST00000451101	AC019172.2	-10.7104	-3.42094	10.7104	down	Ensembl	717	chr2	+	3891773	3895001	upstream	NM_024027	COLEC11	collectin-11 isoform a	-2.89132	-1.53173	2.89132	down	chr2	+	3642636	3692047
ENST00000414398	HCG24	-2.25613	-1.17385	2.25613	down	Ensembl	717	chr6	+	33112559	33115544	downstream	NM_080679	COL11A2	collagen alpha-2(XI) chain isoform 3	-3.63803	-1.86316	3.63803	down	chr6	-	33130468	33160245
ENST00000450860	RP5-1091N2.9	-4.24707	-2.08647	4.24707	down	Ensembl	726	chrX	-	70403408	70418025	upstream	NM_007363	NONO	non-POU domain-containing octamer-binding	4.48298	2.16446	4.48298	up	chrX	+	70503041	70521018
ENST00000442214	AC104654.1	2.79238	1.4815	2.79238	up	Ensembl	741	chr2	+	42104695	42120186	downstream	NM_001145076	EML4	echinoderm microtubule-associated protein-like 4	3.81413	1.93135	3.81413	up	chr2	+	42396489	42559688
ENST00000468538	RP1-149M18.4	-3.2019	-1.67893	3.2019	down	Ensembl	743	chr6	+	41373556	41374299	upstream	NM_018965	TREM2	triggering receptor expressed on myeloid cells 2	12.1618	3.60429	12.1618	up	chr6	-	41126245	41130922
ENST00000468538	RP1-149M18.4	-3.2019	-1.67893	3.2019	down	Ensembl	743	chr6	+	41373556	41374299	upstream	NM_004828	NCR2	natural cytotoxicity triggering receptor 2	-2.37195	-1.24607	2.37195	down	chr6	+	41303527	41318625
ENST00000449954	AL078621.3	-8.01706	-3.00307	8.01706	down	Ensembl	745	chr2	+	114270039	114273062	downstream	NM_007082	RABL2A	rab-like protein 2A	-3.02059	-1.59483	3.02059	down	chr2	+	114384816	114400975
ENST00000449954	AL078621.3	-8.01706	-3.00307	8.01706	down	Ensembl	745	chr2	+	114270039	114273062	downstream	NM_025181	SLC35F5	solute carrier family 35 member F5	2.22237	1.1521	2.22237	up	chr2	-	114471932	114514400
ENST00000424605	RP11-125B21.2	2.53494	1.34195	2.53494	up	Ensembl	746	chr9	-	2535651	2570754	upstream	NM_003383	VLDLR	very low-density lipoprotein receptor isoform a	7.1525	2.83845	7.1525	up	chr9	+	2621792	2654485
ENST00000437920	RP1-148H17.1	-3.96025	-1.98559	3.96025	down	Ensembl	750	chr20	-	46020672	46041071	downstream	NM_005244	EYA2	eyes absent homolog 2 isoform a	-2.42182	-1.27609	2.42182	down	chr20	+	45523262	45817492
ENST00000412357	RP5-1114G22.2	-4.21569	-2.07577	4.21569	down	Ensembl	775	chr1	-	175172363	175173985	downstream	NM_014857	RABGAP1L	rab GTPase-activating protein 1-like isoform A	-2.26005	-1.17635	2.26005	down	chr1	+	174128633	174927327
ENST00000412357	RP5-1114G22.2	-4.21569	-2.07577	4.21569	down	Ensembl	775	chr1	-	175172363	175173985	downstream	NM_014656	KIAA0040	hypothetical protein LOC9674	-3.06068	-1.61385	3.06068	down	chr1	-	175126122	175161949
ENST00000412357	RP5-1114G22.2	-4.21569	-2.07577	4.21569	down	Ensembl	775	chr1	-	175172363	175173985	upstream	NM_003285	TNR	tenascin-R precursor	2.24636	1.16759	2.24636	up	chr1	-	175291934	175712752
uc002qwn.1	BC043553	-2.97089	-1.5709	2.97089	down	UCSC_knowngene	776	chr2	-	780346	863877	upstream	NM_018968	SNTG2	gamma-2-syntrophin	-2.53477	-1.34185	2.53477	down	chr2	+	946553	1371384
ENST00000430391	AF127577.8	-2.39193	-1.25817	2.39193	down	Ensembl	781	chr21	+	16290854	16319417	downstream	NM_003489	NRIP1	nuclear receptor-interacting protein 1	2.92868	1.55025	2.92868	up	chr21	-	16333555	16437126
ENST00000436706	RP11-365O16.3	-2.91968	-1.54581	2.91968	down	Ensembl	790	chr1	-	224396448	224400981	downstream	NM_001136115	FBXO28	F-box only protein 28 isoform b	3.9731	1.99026	3.9731	up	chr1	+	224301790	224349749
ENST00000455039	RP11-426A6.7	-2.78489	-1.47762	2.78489	down	Ensembl	795	chr9	+	138359933	138364095	downstream	NM_144654	C9orf116	hypothetical protein LOC138162 isoform 2	-10.294	-3.36373	10.294	down	chr9	-	138387025	138391761
ENST00000455039	RP11-426A6.7	-2.78489	-1.47762	2.78489	down	Ensembl	795	chr9	+	138359933	138364095	downstream	NM_001018049	PAEP	glycodelin precursor	3.03588	1.60211	3.03588	up	chr9	+	138453603	138458622
ENST00000414488	AL132709.5	4.09434	2.03363	4.09434	up	Ensembl	800	chr14	+	101415314	101424887	upstream	NM_001134888	RTL1	retrotransposon-like protein 1	-2.43959	-1.28664	2.43959	down	chr14	-	101346991	101351184
ENST00000451118	WI2-85898F10.1	-2.19522	-1.13436	2.19522	down	Ensembl	805	chr22	-	46271878	46283628	downstream	NM_006486	FBLN1	fibulin-1 isoform D precursor	2.31348	1.21007	2.31348	up	chr22	+	45898718	45997014
ENST00000451118	WI2-85898F10.1	-2.19522	-1.13436	2.19522	down	Ensembl	805	chr22	-	46271878	46283628	downstream	NM_013236	ATXN10	ataxin-10 isoform 1	2.54225	1.3461	2.54225	up	chr22	+	46067677	46241187
NR_015395	LOC541471	2.08045	1.0569	2.08045	up	RefSeq_NR	809	chr2	-	112124590	112252692	downstream	NM_138621	BCL2L11	bcl-2-like protein 11 isoform 1	-2.52461	-1.33606	2.52461	down	chr2	+	111878490	111926022
ENST00000457157	AP000688.8	-15.2209	-3.92798	15.2209	down	Ensembl	811	chr21	+	37377635	37379899	downstream	NM_001236	CBR3	carbonyl reductase [NADPH] 3	-2.12218	-1.08555	2.12218	down	chr21	+	37507262	37518860
ENST00000435421	RP11-143M1.3	-7.35647	-2.87901	7.35647	down	Ensembl	612	chr9	-	100803	102850	upstream	NM_203447	DOCK8	dedicator of cytokinesis protein 8 isoform 1	-4.38606	-2.13293	4.38606	down	chr9	+	214864	465259
ENST00000455966	RP1-224A6.3	-2.31358	-1.21012	2.31358	down	Ensembl	615	chr1	-	22350486	22351461	downstream	NM_005747	CELA3A	chymotrypsin-like elastase family member 3A	2.71381	1.44032	2.71381	up	chr1	+	22328148	22339035
ENST00000442197	AL132709.9	2.2077	1.14254	2.2077	up	Ensembl	625	chr14	+	101427363	101433377	upstream	NM_001134888	RTL1	retrotransposon-like protein 1	-2.43959	-1.28664	2.43959	down	chr14	-	101346991	101351184
ENST00000415702	CTA-397C4.2	-2.21365	-1.14642	2.21365	down	Ensembl	630	chr22	+	44839206	44840668	downstream	NM_001017530	PRR5	proline-rich protein 5 isoform 3	-5.33752	-2.41617	5.33752	down	chr22	+	45072687	45133561
ENST00000415702	CTA-397C4.2	-2.21365	-1.14642	2.21365	down	Ensembl	630	chr22	+	44839206	44840668	downstream	NM_015366	PRR5	proline-rich protein 5 isoform 2	-9.46551	-3.24268	9.46551	down	chr22	+	45072687	45133561
ENST00000415702	CTA-397C4.2	-2.21365	-1.14642	2.21365	down	Ensembl	630	chr22	+	44839206	44840668	downstream	NM_181334	PRR5-ARHGAP8	PRR5-ARHGAP8 fusion protein	2.38175	1.25202	2.38175	up	chr22	+	45098381	45258664
uc001lln.2	AF086154	-3.71622	-1.89383	3.71622	down	UCSC_knowngene	632	chr10	-	134325131	134331695	downstream	NM_173575	STK32C	serine/threonine-protein kinase 32C	-5.15345	-2.36554	5.15345	down	chr10	-	134020995	134121477
uc001lln.2	AF086154	-3.71622	-1.89383	3.71622	down	UCSC_knowngene	632	chr10	-	134325131	134331695	downstream	NM_030626	LRRC27	leucine-rich repeat-containing protein 27	-4.40637	-2.13959	4.40637	down	chr10	+	134145613	134195010
ENST00000441665	AP002856.4	-2.3081	-1.20671	2.3081	down	Ensembl	635	chr11	+	131056916	131059648	downstream	NM_001048209	NTM	neurotrimin isoform 2	-2.59805	-1.37743	2.59805	down	chr11	+	131240370	132206716
ENST00000437113	RP11-214F16.4	-6.79539	-2.76456	6.79539	down	Ensembl	652	chr13	+	100229365	100232622	downstream	NM_206808	CLYBL	citrate lyase subunit beta-like protein,	-5.58093	-2.4805	5.58093	down	chr13	+	100258918	100549388
ENST00000426575	RP11-318C24.2	-2.26099	-1.17695	2.26099	down	Ensembl	657	chr1	-	175873897	175889649	upstream	NM_001001740	RFWD2	E3 ubiquitin-protein ligase RFWD2 isoform d24	6.93967	2.79487	6.93967	up	chr1	-	175913966	176176370
ENST00000426575	RP11-318C24.2	-2.26099	-1.17695	2.26099	down	Ensembl	657	chr1	-	175873897	175889649	upstream	NM_022457	RFWD2	E3 ubiquitin-protein ligase RFWD2 isoform a	7.0983	2.82747	7.0983	up	chr1	-	175913966	176176370
ENST00000488578	RP4-565E6.1	-2.172	-1.11903	2.172	down	Ensembl	669	chr1	-	146093233	146130539	downstream	NM_001097612	GPR89A	Golgi pH regulator A isoform 1	3.22433	1.689	3.22433	up	chr1	-	145764594	145827103
ENST00000420549	RP11-147G16.1	-3.13738	-1.64956	3.13738	down	Ensembl	671	chr1	-	82680903	82726817	downstream	NM_012302	LPHN2	latrophilin-2 precursor	2.06681	1.04741	2.06681	up	chr1	+	82266081	82458107
ENST00000450671	RP3-475N16.1	-4.12139	-2.04313	4.12139	down	Ensembl	679	chr6	+	42908101	42911708	downstream	NM_018960	GNMT	glycine N-methyltransferase	-7.16902	-2.84178	7.16902	down	chr6	+	42928499	42931618
ENST00000449457	RP11-445P17.8	-2.72786	-1.44777	2.72786	down	Ensembl	692	chr10	-	5307995	5313199	upstream	NM_017422	CALML5	calmodulin-like protein 5	-7.21474	-2.85095	7.21474	down	chr10	-	5540657	5541533
ENST00000447883	RP11-277L2.3	-2.90976	-1.5409	2.90976	down	Ensembl	561	chr1	-	149576590	149577296	upstream	NM_001040874	HIST2H2AA4	histone H2A type 2-A	-3.28476	-1.71579	3.28476	down	chr1	+	149822627	149823161
ENST00000443303	RP3-523C21.1	-7.74865	-2.95394	7.74865	down	Ensembl	569	chr6	+	132455550	132490514	upstream	NM_006208	ENPP1	ectonucleotide pyrophosphatase/phosphodiesterase	-2.69189	-1.42862	2.69189	down	chr6	+	132129155	132216295
ENST00000454185	RP11-568A7.3	-24.696	-4.62621	24.696	down	Ensembl	579	chr6	-	167650995	167653968	downstream	NM_004367	CCR6	C-C chemokine receptor type 6	-2.69658	-1.43113	2.69658	down	chr6	+	167525294	167552629
ENST00000454185	RP11-568A7.3	-24.696	-4.62621	24.696	down	Ensembl	579	chr6	-	167650995	167653968	upstream	NM_031949	TTLL2	probable tubulin polyglutamylase TTLL2	4.09902	2.03528	4.09902	up	chr6	+	167738573	167756177
ENST00000437830	XX-CR54.1	-2.59395	-1.37515	2.59395	down	Ensembl	580	chr1	+	248855491	248862411	upstream	NM_030904	OR2T1	olfactory receptor 2T1	-4.04577	-2.01641	4.04577	down	chr1	+	248569295	248570405
ENST00000437830	XX-CR54.1	-2.59395	-1.37515	2.59395	down	Ensembl	580	chr1	+	248855491	248862411	upstream	NM_001013355	OR2G6	olfactory receptor 2G6	-4.97637	-2.31509	4.97637	down	chr1	+	248684947	248685898
ENST00000437830	XX-CR54.1	-2.59395	-1.37515	2.59395	down	Ensembl	580	chr1	+	248855491	248862411	downstream	NM_030645	SH3BP5L	SH3 domain-binding protein 5-like	-2.43678	-1.28498	2.43678	down	chr1	-	249104650	249120154
uc003zfy.2	AY343902	-3.88498	-1.95791	3.88498	down	UCSC_knowngene	581	chr9	-	100994	102941	upstream	NM_203447	DOCK8	dedicator of cytokinesis protein 8 isoform 1	-4.38606	-2.13293	4.38606	down	chr9	+	214864	465259
ENST00000452181	RP1-90G24.6	-9.95987	-3.31613	9.95987	down	Ensembl	590	chr22	+	32669406	32673173	upstream	NM_006605	RFPL2	ret finger protein-like 2 isoform 1	-4.20315	-2.07147	4.20315	down	chr22	-	32586421	32589466
ENST00000452181	RP1-90G24.6	-9.95987	-3.31613	9.95987	down	Ensembl	590	chr22	+	32669406	32673173	downstream	NM_012179	FBXO7	F-box only protein 7 isoform 1	2.23035	1.15727	2.23035	up	chr22	+	32870706	32894818
ENST00000448058	RP11-17H4.2	-7.90005	-2.98186	7.90005	down	Ensembl	597	chr1	-	231727037	231747836	upstream	NM_001164540	DISC1	disrupted in schizophrenia 1 protein isoform d	4.18051	2.06368	4.18051	up	chr1	+	231762560	232177019
ENST00000422405	RP11-318G21.3	-8.80349	-3.13808	8.80349	down	Ensembl	601	chr13	+	78402356	78408085	downstream	NM_003991	EDNRB	endothelin B receptor isoform 2 precursor	2.01782	1.0128	2.01782	up	chr13	-	78469615	78492966
ENST00000424705	RP3-461P17.10	-3.05311	-1.61028	3.05311	down	Ensembl	514	chr20	+	44076041	44076982	upstream	NM_002638	PI3	elafin preproprotein	-122.966	-6.94211	122.966	down	chr20	+	43803539	43805185
ENST00000424705	RP3-461P17.10	-3.05311	-1.61028	3.05311	down	Ensembl	514	chr20	+	44076041	44076982	upstream	NM_003064	SLPI	antileukoproteinase precursor	-269.954	-8.07657	269.954	down	chr20	-	43880878	43883206
ENST00000424705	RP3-461P17.10	-3.05311	-1.61028	3.05311	down	Ensembl	514	chr20	+	44076041	44076982	upstream	NM_030590	MATN4	matrilin-4 isoform 2 precursor	-4.94211	-2.30513	4.94211	down	chr20	-	43922086	43936967
ENST00000424705	RP3-461P17.10	-3.05311	-1.61028	3.05311	down	Ensembl	514	chr20	+	44076041	44076982	downstream	NM_006652	SPINT3	kunitz-type protease inhibitor 3 precursor	-3.5719	-1.83669	3.5719	down	chr20	-	44141100	44144264
ENST00000424705	RP3-461P17.10	-3.05311	-1.61028	3.05311	down	Ensembl	514	chr20	+	44076041	44076982	downstream	NM_080753	WFDC10A	WAP four-disulfide core domain protein 10A	2.86554	1.51881	2.86554	up	chr20	+	44258384	44259831
ENST00000424705	RP3-461P17.10	-3.05311	-1.61028	3.05311	down	Ensembl	514	chr20	+	44076041	44076982	downstream	NM_178455	SPINT4	kunitz-type protease inhibitor 4 precursor	-4.87257	-2.28468	4.87257	down	chr20	+	44350987	44354335
ENST00000418215	AC000123.4	2.38281	1.25266	2.38281	up	Ensembl	516	chr7	+	126990181	126991577	upstream	NM_000845	GRM8	metabotropic glutamate receptor 8 isoform a	2.26565	1.17992	2.26565	up	chr7	-	126078651	126883569
ENST00000422253	RP5-968D22.3	-2.00757	-1.00545	2.00757	down	Ensembl	519	chr1	-	168433451	168464882	downstream	NM_152902	TIPRL	TIP41-like protein isoform 1	3.43782	1.78149	3.43782	up	chr1	+	168148170	168171351
ENST00000437772	AF003626.1	-2.11275	-1.07913	2.11275	down	Ensembl	520	chrX	+	150084285	150089411	downstream	NM_005342	HMGB3	high mobility group protein B3	2.09576	1.06747	2.09576	up	chrX	+	150151762	150159248
ENST00000444862	AP005273.1	-2.93067	-1.55123	2.93067	down	Ensembl	522	chr11	+	64268324	64272858	upstream	NM_001177358	GPR137	integral membrane protein GPR137 isoform 5	2.37019	1.245	2.37019	up	chr11	+	64052282	64056972
ENST00000442712	RP11-439E19.7	-2.48938	-1.31579	2.48938	down	Ensembl	522	chr1	+	246853348	246855123	downstream	NM_020394	ZNF695	zinc finger protein 695 isoform 1	9.34056	3.22351	9.34056	up	chr1	-	247148624	247171395
ENST00000441085	RP11-98G7.1	2.68045	1.42247	2.68045	up	Ensembl	523	chr1	-	156416203	156426258	downstream	NM_198406	PAQR6	progestin and adipoQ receptor family member 6	2.7474	1.45806	2.7474	up	chr1	-	156213208	156217792
ENST00000441085	RP11-98G7.1	2.68045	1.42247	2.68045	up	Ensembl	523	chr1	-	156416203	156426258	downstream	NM_006365	C1orf61	protein CROC-4	2.48615	1.31391	2.48615	up	chr1	-	156374054	156399184
ENST00000441085	RP11-98G7.1	2.68045	1.42247	2.68045	up	Ensembl	523	chr1	-	156416203	156426258	upstream	NM_198427	BCAN	brevican core protein isoform 2	-3.16565	-1.6625	3.16565	down	chr1	+	156611739	156623264
ENST00000448282	RP1-102H19.6	2.9047	1.53839	2.9047	up	Ensembl	542	chr6	+	88081310	88102519	upstream	NM_015021	ZNF292	zinc finger protein 292	2.02897	1.02074	2.02897	up	chr6	+	87865268	87973406
ENST00000448282	RP1-102H19.6	2.9047	1.53839	2.9047	up	Ensembl	542	chr6	+	88081310	88102519	downstream	NM_001031743	C6orf165	hypothetical protein LOC154313	-28.163	-4.81573	28.163	down	chr6	+	88117689	88174191
ENST00000450784	RP11-452F19.3	2.00558	1.00402	2.00558	up	Ensembl	543	chr1	+	222988363	223010726	upstream	NM_207468	FAM177B	hypothetical protein LOC400823	-20.7003	-4.37158	20.7003	down	chr1	+	222910557	222924002
uc004fnm.2	U00684	2.04968	1.0354	2.04968	up	UCSC_knowngene	552	chrX	+	154697946	154716706	upstream	NM_003372	VBP1	prefoldin subunit 3	4.00171	2.00062	4.00171	up	chrX	+	154444700	154468098
uc004fnm.2	U00684	2.04968	1.0354	2.04968	up	UCSC_knowngene	552	chrX	+	154697946	154716706	upstream	NM_012151	F8A1	factor VIII intron 22 protein	-3.90362	-1.96481	3.90362	down	chrX	+	154611748	154613450
ENST00000439823	AC002480.4	3.29551	1.7205	3.29551	up	Ensembl	557	chr7	+	22629323	22631241	downstream	NM_000600	IL6	interleukin-6 precursor	5.43708	2.44283	5.43708	up	chr7	+	22766765	22771621
ENST00000455568	NCRNA00087	-2.31843	-1.21315	2.31843	down	Ensembl	471	chrX	-	134229142	134232388	upstream	NM_152695	ZNF449	zinc finger protein 449	2.47803	1.30919	2.47803	up	chrX	+	134478695	134497338
ENST00000457239	RP11-71G12.1	-12.8834	-3.68744	12.8834	down	Ensembl	471	chr1	+	157155177	157157195	upstream	NM_144702	LRRC71	leucine-rich repeat-containing protein 71	-6.18302	-2.62831	6.18302	down	chr1	+	156890423	156902880
ENST00000412060	Z83851.1	-2.31326	-1.20993	2.31326	down	Ensembl	475	chr22	-	42760407	42765214	downstream	NM_181492	TCF20	transcription factor 20 isoform 2	2.17979	1.12419	2.17979	up	chr22	-	42556018	42611445
ENST00000412060	Z83851.1	-2.31326	-1.20993	2.31326	down	Ensembl	475	chr22	-	42760407	42765214	upstream	NM_001165877	ATP5L2	ATP synthase subunit g 2, mitochondrial	-2.35782	-1.23746	2.35782	down	chr22	-	43035808	43036607
ENST00000412797	RP11-70P17.1	-9.03379	-3.17533	9.03379	down	Ensembl	483	chr1	+	25907968	25916847	downstream	NM_020379	MAN1C1	mannosyl-oligosaccharide 1,2-alpha-mannosidase	-2.09855	-1.0694	2.09855	down	chr1	+	25943958	26111258
ENST00000412797	RP11-70P17.1	-9.03379	-3.17533	9.03379	down	Ensembl	483	chr1	+	25907968	25916847	downstream	NM_020451	SEPN1	selenoprotein N isoform 1 precursor	-2.6422	-1.40174	2.6422	down	chr1	+	26126666	26144713
ENST00000420876	RP11-511I2.2	-4.22292	-2.07824	4.22292	down	Ensembl	483	chr1	-	47846599	47874149	downstream	NM_001136140	CMPK1	UMP-CMP kinase isoform b	2.42314	1.27688	2.42314	up	chr1	+	47799468	47844511
ENST00000420876	RP11-511I2.2	-4.22292	-2.07824	4.22292	down	Ensembl	483	chr1	-	47846599	47874149	downstream	NM_016308	CMPK1	UMP-CMP kinase isoform a	2.19628	1.13507	2.19628	up	chr1	+	47799468	47844511
ENST00000446145	RP11-239E10.3	3.59247	1.84498	3.59247	up	Ensembl	487	chr1	+	223354485	223361496	upstream	NM_003268	TLR5	toll-like receptor 5 precursor	32.7786	5.03468	32.7786	up	chr1	-	223282747	223316624
ENST00000438829	RP11-413P11.1	-4.21828	-2.07666	4.21828	down	Ensembl	495	chr1	-	99937917	99999571	upstream	NM_017734	PALMD	palmdelphin	-6.53918	-2.70911	6.53918	down	chr1	+	100111430	100160097
uc001hpx.2	BC032899	3.37364	1.7543	3.37364	up	UCSC_knowngene	502	chr1	+	226271655	226277990	upstream	NM_003133	SRP9	signal recognition particle 9 kDa protein	3.77802	1.91763	3.77802	up	chr1	+	225965514	225978168
uc001hpx.2	BC032899	3.37364	1.7543	3.37364	up	UCSC_knowngene	502	chr1	+	226271655	226277990	downstream	NM_173083	LIN9	protein lin-9 homolog	13.1344	3.71528	13.1344	up	chr1	-	226418860	226497198
ENST00000414795	AC017076.5	4.97275	2.31404	4.97275	up	Ensembl	506	chr2	-	6969010	6980595	upstream	NM_080657	RSAD2	radical S-adenosyl methionine domain-containing	14.5382	3.86178	14.5382	up	chr2	+	7017795	7038363
ENST00000420210	RP11-374F3.4	-3.06627	-1.61648	3.06627	down	Ensembl	508	chr13	-	30915495	30941804	upstream	NM_005800	USPL1	ubiquitin-specific peptidase-like protein 1	2.00103	1.00074	2.00103	up	chr13	+	31191829	31233686
ENST00000412722	RP11-374F3.3	-3.51218	-1.81237	3.51218	down	Ensembl	430	chr13	-	30890496	30894040	upstream	NM_005800	USPL1	ubiquitin-specific peptidase-like protein 1	2.00103	1.00074	2.00103	up	chr13	+	31191829	31233686
ENST00000456537	AC004448.5	-2.72794	-1.44781	2.72794	down	Ensembl	441	chr17	-	19342455	19364048	downstream	NM_007148	RNF112	RING finger protein 112	-5.74899	-2.52331	5.74899	down	chr17	+	19314490	19320589
ENST00000440492	RP11-288L9.1	9.78162	3.29007	9.78162	up	Ensembl	441	chr1	-	27986838	27989233	upstream	NM_022872	IFI6	interferon alpha-inducible protein 6 isoform b	5.98362	2.58102	5.98362	up	chr1	-	27992571	27998724
ENST00000440492	RP11-288L9.1	9.78162	3.29007	9.78162	up	Ensembl	441	chr1	-	27986838	27989233	upstream	NM_018053	XKR8	XK-related protein 8	-2.6276	-1.39375	2.6276	down	chr1	+	28286503	28294604
ENST00000414875	RP1-153P14.5	-4.94842	-2.30697	4.94842	down	Ensembl	442	chr6	+	37517779	37518636	downstream	NM_021943	ZFAND3	AN1-type zinc finger protein 3	2.15252	1.10603	2.15252	up	chr6	+	37787306	38122399
ENST00000451438	RP11-168L22.2	-2.42531	-1.27817	2.42531	down	Ensembl	391	chr10	+	43819112	43823380	upstream	NM_020630	RET	proto-oncogene tyrosine-protein kinase receptor	-4.38851	-2.13373	4.38851	down	chr10	+	43572516	43622952
ENST00000451438	RP11-168L22.2	-2.42531	-1.27817	2.42531	down	Ensembl	391	chr10	+	43819112	43823380	upstream	NM_020975	RET	proto-oncogene tyrosine-protein kinase receptor	-6.228	-2.63877	6.228	down	chr10	+	43572516	43625797
ENST00000451438	RP11-168L22.2	-2.42531	-1.27817	2.42531	down	Ensembl	391	chr10	+	43819112	43823380	downstream	NM_001098205	HNRNPF	heterogeneous nuclear ribonucleoprotein F	-3.07556	-1.62085	3.07556	down	chr10	-	43881064	43904332
ENST00000451438	RP11-168L22.2	-2.42531	-1.27817	2.42531	down	Ensembl	391	chr10	+	43819112	43823380	downstream	NM_001098204	HNRNPF	heterogeneous nuclear ribonucleoprotein F	2.47086	1.30502	2.47086	up	chr10	-	43881064	43904696
ENST00000418403	RP11-462G2.1	-4.09546	-2.03403	4.09546	down	Ensembl	397	chr6	+	71104589	71109120	downstream	NM_001105531	FAM135A	hypothetical protein LOC57579 isoform a	3.06428	1.61555	3.06428	up	chr6	+	71123106	71270877
ENST00000418403	RP11-462G2.1	-4.09546	-2.03403	4.09546	down	Ensembl	397	chr6	+	71104589	71109120	downstream	NM_021940	SMAP1	stromal membrane-associated protein 1 isoform B	2.43067	1.28136	2.43067	up	chr6	+	71377478	71571716
ENST00000415726	RP11-336K24.5	-7.80017	-2.9635	7.80017	down	Ensembl	401	chr1	+	155961180	155971578	downstream	NM_198406	PAQR6	progestin and adipoQ receptor family member 6	2.7474	1.45806	2.7474	up	chr1	-	156213208	156217792
ENST00000438178	AC008278.2	-8.17357	-3.03097	8.17357	down	Ensembl	409	chr2	+	15704293	15713992	downstream	NM_004939	DDX1	ATP-dependent RNA helicase DDX1	2.54448	1.34737	2.54448	up	chr2	+	15731769	15771225
ENST00000449071	RP11-128B16.3	-2.28577	-1.19268	2.28577	down	Ensembl	422	chr10	-	26866604	26868236	upstream	NM_014317	PDSS1	decaprenyl-diphosphate synthase subunit 1	5.27617	2.39949	5.27617	up	chr10	+	26986594	27035726
ENST00000455247	RP5-1109J22.3	-2.57406	-1.36405	2.57406	down	Ensembl	354	chr1	+	46921494	46948147	upstream	NM_005727	TSPAN1	tetraspanin-1	-13.0976	-3.71123	13.0976	down	chr1	+	46640748	46651634
ENST00000455247	RP5-1109J22.3	-2.57406	-1.36405	2.57406	down	Ensembl	354	chr1	+	46921494	46948147	downstream	NM_147192	DMBX1	diencephalon/mesencephalon homeobox protein 1	2.12507	1.08751	2.12507	up	chr1	+	46972667	46979886
ENST00000416924	RP11-484I6.6	-2.65158	-1.40685	2.65158	down	Ensembl	361	chr13	+	103532285	103533517	upstream	NM_001159596	BIVM	basic immunoglobulin-like variable	2.38948	1.2567	2.38948	up	chr13	+	103451398	103493888
ENST00000437899	RP11-38L15.2	-2.57295	-1.36343	2.57295	down	Ensembl	369	chr10	-	46937462	46951699	upstream	NM_181519	SYT15	synaptotagmin-15 isoform b	-3.00513	-1.58743	3.00513	down	chr10	-	46955443	46970601
ENST00000437899	RP11-38L15.2	-2.57295	-1.36343	2.57295	down	Ensembl	369	chr10	-	46937462	46951699	upstream	NM_014696	GPRIN2	G protein-regulated inducer of neurite outgrowth	-25.4839	-4.67151	25.4839	down	chr10	+	46993545	47000568
ENST00000428426	AC002511.3	-2.08235	-1.05821	2.08235	down	Ensembl	376	chr19	-	35923858	35924720	downstream	NM_139284	LGI4	leucine-rich repeat LGI family member 4	-3.15915	-1.65954	3.15915	down	chr19	-	35615416	35626178
ENST00000437867	RP11-478K15.2	-10.4622	-3.38711	10.4622	down	Ensembl	266	chr13	+	44717728	44813010	downstream	NM_001010897	SERP2	stress-associated endoplasmic reticulum protein	-2.86536	-1.51871	2.86536	down	chr13	+	44947977	44971850
ENST00000421153	RP4-811H24.8	-3.32788	-1.7346	3.32788	down	Ensembl	267	chr1	+	32817121	32819143	upstream	NM_024296	CCDC28B	coiled-coil domain-containing protein 28B	3.00752	1.58857	3.00752	up	chr1	+	32666201	32670991
ENST00000421153	RP4-811H24.8	-3.32788	-1.7346	3.32788	down	Ensembl	267	chr1	+	32817121	32819143	upstream	NM_018134	IQCC	IQ domain-containing protein C isoform 2	-2.30978	-1.20775	2.30978	down	chr1	+	32671235	32674288
ENST00000421153	RP4-811H24.8	-3.32788	-1.7346	3.32788	down	Ensembl	267	chr1	+	32817121	32819143	upstream	NM_001099434	DCDC2B	doublecortin domain-containing protein 2B	-1156.26	-10.1752	1156.26	down	chr1	+	32674694	32681797
ENST00000422410	RP11-344N17.8	-2.26376	-1.17872	2.26376	down	Ensembl	270	chrX	-	48193109	48193874	upstream	NM_001040612	SSX4B	protein SSX4 isoform b	-2.00577	-1.00416	2.00577	down	chrX	+	48242967	48252781
ENST00000422410	RP11-344N17.8	-2.26376	-1.17872	2.26376	down	Ensembl	270	chrX	-	48193109	48193874	upstream	NM_017883	WDR13	WD repeat-containing protein 13 isoform 1	2.213	1.146	2.213	up	chrX	+	48455879	48463582
ENST00000428814	RP11-432J24.2	-3.19664	-1.67656	3.19664	down	Ensembl	297	chr10	+	134232586	134234457	upstream	NM_173575	STK32C	serine/threonine-protein kinase 32C	-5.15345	-2.36554	5.15345	down	chr10	-	134020995	134121477
ENST00000428814	RP11-432J24.2	-3.19664	-1.67656	3.19664	down	Ensembl	297	chr10	+	134232586	134234457	upstream	NM_001143758	LRRC27	leucine-rich repeat-containing protein 27	-2.16251	-1.11271	2.16251	down	chr10	+	134145613	134166901
ENST00000428814	RP11-432J24.2	-3.19664	-1.67656	3.19664	down	Ensembl	297	chr10	+	134232586	134234457	upstream	NM_030626	LRRC27	leucine-rich repeat-containing protein 27	-4.40637	-2.13959	4.40637	down	chr10	+	134145613	134195010
ENST00000428814	RP11-432J24.2	-3.19664	-1.67656	3.19664	down	Ensembl	297	chr10	+	134232586	134234457	upstream	NM_001143757	LRRC27	leucine-rich repeat-containing protein 27	-2.78873	-1.47961	2.78873	down	chr10	+	134145740	134195010
ENST00000444515	C1orf46	-15.1761	-3.92373	15.1761	down	Ensembl	302	chr1	+	152627952	152629280	upstream	NM_019060	CRCT1	cysteine-rich C-terminal protein 1	-936.001	-9.87037	936.001	down	chr1	+	152486977	152488481
ENST00000444515	C1orf46	-15.1761	-3.92373	15.1761	down	Ensembl	302	chr1	+	152627952	152629280	downstream	NM_001025231	KPRP	keratinocyte proline-rich protein	-54.1285	-5.75832	54.1285	down	chr1	+	152730505	152734529
ENST00000444515	C1orf46	-15.1761	-3.92373	15.1761	down	Ensembl	302	chr1	+	152627952	152629280	downstream	NM_178351	LCE1C	late cornified envelope protein 1C	2.57268	1.36327	2.57268	up	chr1	-	152777310	152779107
ENST00000442526	RP11-517P14.2	3.78557	1.92051	3.78557	up	Ensembl	303	chr10	+	43916046	43917254	upstream	NM_020630	RET	proto-oncogene tyrosine-protein kinase receptor	-4.38851	-2.13373	4.38851	down	chr10	+	43572516	43622952
ENST00000442526	RP11-517P14.2	3.78557	1.92051	3.78557	up	Ensembl	303	chr10	+	43916046	43917254	upstream	NM_020975	RET	proto-oncogene tyrosine-protein kinase receptor	-6.228	-2.63877	6.228	down	chr10	+	43572516	43625797
ENST00000442526	RP11-517P14.2	3.78557	1.92051	3.78557	up	Ensembl	303	chr10	+	43916046	43917254	upstream	NM_018590	CSGALNACT2	chondroitin sulfate	2.4436	1.28901	2.4436	up	chr10	+	43633933	43680749
ENST00000442526	RP11-517P14.2	3.78557	1.92051	3.78557	up	Ensembl	303	chr10	+	43916046	43917254	upstream	NM_001098205	HNRNPF	heterogeneous nuclear ribonucleoprotein F	-3.07556	-1.62085	3.07556	down	chr10	-	43881064	43904332
ENST00000442526	RP11-517P14.2	3.78557	1.92051	3.78557	up	Ensembl	303	chr10	+	43916046	43917254	upstream	NM_001098204	HNRNPF	heterogeneous nuclear ribonucleoprotein F	2.47086	1.30502	2.47086	up	chr10	-	43881064	43904696
ENST00000441287	AC011193.1	2.78177	1.476	2.78177	up	Ensembl	323	chr17	+	32806352	32806976	upstream	NM_002982	CCL2	C-C motif chemokine 2 precursor	4.66824	2.22288	4.66824	up	chr17	+	32582295	32584220
ENST00000441287	AC011193.1	2.78177	1.476	2.78177	up	Ensembl	323	chr17	+	32806352	32806976	upstream	NM_005408	CCL13	C-C motif chemokine 13 precursor	2.89055	1.53135	2.89055	up	chr17	+	32683470	32685629
ENST00000440189	RP11-179B15.5	-3.83917	-1.9408	3.83917	down	Ensembl	328	chr10	+	60064312	60065381	downstream	NM_003338	UBE2D1	ubiquitin-conjugating enzyme E2 D1 isoform 1	2.26695	1.18075	2.26695	up	chr10	+	60094738	60130513
ENST00000440189	RP11-179B15.5	-3.83917	-1.9408	3.83917	down	Ensembl	328	chr10	+	60064312	60065381	downstream	NM_003201	TFAM	transcription factor A, mitochondrial precursor	4.06481	2.02319	4.06481	up	chr10	+	60145175	60155897
ENST00000440189	RP11-179B15.5	-3.83917	-1.9408	3.83917	down	Ensembl	328	chr10	+	60064312	60065381	downstream	NM_001080512	BICC1	protein bicaudal C homolog 1	2.23386	1.15954	2.23386	up	chr10	+	60272903	60588845
ENST00000454647	C18orf20	-2.18707	-1.129	2.18707	down	Ensembl	339	chr18	-	61747535	61765844	downstream	NM_001123366	HMSD	serpin-like protein HMSD precursor	3.03226	1.60039	3.03226	up	chr18	+	61616587	61627645
ENST00000452795	RP4-798A10.4	-4.54449	-2.18412	4.54449	down	Ensembl	342	chr1	+	16847188	16848303	upstream	NM_001145278	NECAP2	adaptin ear-binding coat-associated protein 2	2.29139	1.19622	2.29139	up	chr1	+	16767166	16786584
ENST00000417443	NCRNA00086	-3.41868	-1.77344	3.41868	down	Ensembl	2913	chrX	+	134555867	134559682	upstream	NM_152695	ZNF449	zinc finger protein 449	2.47803	1.30919	2.47803	up	chrX	+	134478695	134497338
ENST00000431020	AC012368.2	-2.8631	-1.51758	2.8631	down	Ensembl	3307	chr2	-	64412211	64432619	upstream	NM_014181	HSPC159	galectin-related protein	2.9511	1.56125	2.9511	up	chr2	+	64681326	64688517
NR_033370	LOC63930	-3.65208	-1.86872	3.65208	down	RefSeq_NR	3366	chr20	+	61640734	61716423	upstream	NM_017896	C20orf11	protein C20orf11	4.58269	2.1962	4.58269	up	chr20	+	61569440	61579827
NR_033370	LOC63930	-3.65208	-1.86872	3.65208	down	RefSeq_NR	3366	chr20	+	61640734	61716423	downstream	NM_000744	CHRNA4	neuronal acetylcholine receptor subunit alpha-4	-4.61075	-2.205	4.61075	down	chr20	-	61974664	61992695
NR_027029	MGC34034	-3.39994	-1.76551	3.39994	down	RefSeq_NR	3517	chr6	+	134142284	134175130	downstream	NM_003206	TCF21	transcription factor 21	-3.64301	-1.86513	3.64301	down	chr6	+	134210259	134213393
uc002khh.2	LOC388312	2.72376	1.4456	2.72376	up	UCSC_knowngene	4812	chr1	-	661139	679736	upstream	NM_005101	ISG15	ubiquitin-like protein ISG15 precursor	7.09086	2.82596	7.09086	up	chr1	+	948846	949919
NR_026790	HCG11	2.34289	1.22829	2.34289	up	RefSeq_NR	5688	chr6	+	26521933	26527610	upstream	NM_003540	HIST1H4F	histone H4	-2.65727	-1.40994	2.65727	down	chr6	+	26240653	26241021
NR_026790	HCG11	2.34289	1.22829	2.34289	up	RefSeq_NR	5688	chr6	+	26521933	26527610	upstream	NM_001145009	BTN3A1	butyrophilin subfamily 3 member A1 isoform d	-2.01633	-1.01173	2.01633	down	chr6	+	26402464	26415444
ENST00000450248	TUG1	3.39841	1.76486	3.39841	up	Ensembl	6477	chr22	+	31365642	31374831	downstream	NM_006932	SMTN	smoothelin isoform c	3.99201	1.99711	3.99201	up	chr22	+	31477304	31500609
ENST00000450248	TUG1	3.39841	1.76486	3.39841	up	Ensembl	6477	chr22	+	31365642	31374831	downstream	NM_001002837	INPP5J	phosphatidylinositol 4,5-bisphosphate	2.53125	1.33985	2.53125	up	chr22	+	31518960	31530683
ENST00000450248	TUG1	3.39841	1.76486	3.39841	up	Ensembl	6477	chr22	+	31365642	31374831	downstream	NM_005569	LIMK2	LIM domain kinase 2 isoform 2a	-2.54148	-1.34567	2.54148	down	chr22	+	31608249	31676066
NR_027418	LOC651250	-2.31292	-1.20972	2.31292	down	RefSeq_NR	11210	chr17	+	66097695	66132068	upstream	NM_004459	BPTF	nucleosome-remodeling factor subunit BPTF	2.18212	1.12573	2.18212	up	chr17	+	65821779	65980494
NR_027418	LOC651250	-2.31292	-1.20972	2.31292	down	RefSeq_NR	11210	chr17	+	66097695	66132068	downstream	NM_001033574	AMZ2	archaemetzincin-2 isoform 2	2.95502	1.56317	2.95502	up	chr17	+	66244144	66253305
ENST00000439207	RP11-568A7.2	-2.73248	-1.45021	2.73248	down	Ensembl	205	chr6	+	167655378	167659404	upstream	NM_004367	CCR6	C-C chemokine receptor type 6	-2.69658	-1.43113	2.69658	down	chr6	+	167525294	167552629
ENST00000439207	RP11-568A7.2	-2.73248	-1.45021	2.73248	down	Ensembl	205	chr6	+	167655378	167659404	upstream	NM_031409	CCR6	C-C chemokine receptor type 6	-9.41627	-3.23515	9.41627	down	chr6	+	167536240	167552629
ENST00000439207	RP11-568A7.2	-2.73248	-1.45021	2.73248	down	Ensembl	205	chr6	+	167655378	167659404	downstream	NM_031949	TTLL2	probable tubulin polyglutamylase TTLL2	4.09902	2.03528	4.09902	up	chr6	+	167738573	167756177
ENST00000415471	RP11-100G15.10	-2.47865	-1.30956	2.47865	down	Ensembl	211	chr9	-	94912662	94919727	downstream	NM_006415	SPTLC1	serine palmitoyltransferase 1 isoform a	2.15495	1.10765	2.15495	up	chr9	-	94793426	94877690
ENST00000415471	RP11-100G15.10	-2.47865	-1.30956	2.47865	down	Ensembl	211	chr9	-	94912662	94919727	upstream	NM_017680	ASPN	asporin isoform 1 preproprotein	66.2644	6.05016	66.2644	up	chr9	-	95218488	95244844
ENST00000435617	RP11-279N8.2	-3.09043	-1.62781	3.09043	down	Ensembl	215	chr13	-	48479463	48481492	upstream	NM_018283	NUDT15	probable 7,8-dihydro-8-oxoguanine triphosphatase	2.98433	1.57741	2.98433	up	chr13	+	48611702	48621282
ENST00000434255	RP1-32B1.4	2.29321	1.19737	2.29321	up	Ensembl	216	chr6	+	135581133	135582071	upstream	NM_001145207	HBS1L	HBS1-like protein isoform 3	2.80052	1.4857	2.80052	up	chr6	-	135356994	135376036
uc010nxt.1	AK125248	-2.26518	-1.17962	2.26518	down	UCSC_knowngene	2373	chr1	-	89294	237877	upstream	NM_001005221	OR4F29	olfactory receptor 4F3/4F16/4F29	-4.50176	-2.17049	4.50176	down	chr1	+	367658	368597
ENST00000437515	AL358175.1	2.04557	1.0325	2.04557	up	Ensembl	2504	chr1	-	121102016	121139765	downstream	NM_001100910	FAM72B	amyloid-beta peptide-induced protein p17	11.689	3.54708	11.689	up	chr1	+	120839004	120855681
uc001ihe.3	LOC100216001	-2.804	-1.48749	2.804	down	UCSC_knowngene	2553	chr10	-	4621443	4720262	upstream	NM_001353	AKR1C1	aldo-keto reductase family 1 member C1	-37.1991	-5.21719	37.1991	down	chr10	+	5005453	5020158
ENST00000512967	AL031123.1	-2.25778	-1.1749	2.25778	down	Ensembl	2641	chr6	-	6695026	6700720	downstream	NM_004271	LY86	lymphocyte antigen 86 precursor	-3.28085	-1.71407	3.28085	down	chr6	+	6588933	6655216
ENST00000433673	AC068282.3	10.0492	3.32901	10.0492	up	Ensembl	2690	chr2	+	128146705	128158156	upstream	NM_139348	BIN1	myc box-dependent-interacting protein 1 isoform	-4.12381	-2.04398	4.12381	down	chr2	-	127805606	127864864
uc001jef.2	LOC643650	9.66581	3.27289	9.66581	up	UCSC_knowngene	2876	chr10	-	47096454	47151400	downstream	NM_181519	SYT15	synaptotagmin-15 isoform b	-3.00513	-1.58743	3.00513	down	chr10	-	46955443	46970601
uc002khh.2	LOC388312	2.72376	1.4456	2.72376	up	UCSC_knowngene	4812	chr1	-	661139	679736	upstream	NM_152486	SAMD11	sterile alpha motif domain-containing protein	-4.54638	-2.18472	4.54638	down	chr1	+	861120	879961
uc002khh.2	LOC388312	2.72376	1.4456	2.72376	up	UCSC_knowngene	4812	chr1	-	661139	679736	upstream	NM_032129	PLEKHN1	pleckstrin homology domain-containing family N	-2.04493	-1.03205	2.04493	down	chr1	+	901876	910484
uc002khh.2	LOC388312	2.72376	1.4456	2.72376	up	UCSC_knowngene	4812	chr1	-	661139	679736	upstream	NM_021170	HES4	transcription factor HES-4 isoform 2	3.57128	1.83644	3.57128	up	chr1	-	934341	935552
ENST00000484550	AC093627.10	-18.7503	-4.22884	18.7503	down	Ensembl	5008	chr7	+	149596	155465	downstream	NM_020223	FAM20C	dentin matrix protein 4	2.29778	1.20024	2.29778	up	chr7	+	192968	300711
AK055023		-2.23883	-1.16274	2.23883	down	misc_RNA	1974	chr10	-	72689681	72695453	upstream	NM_170744	UNC5B	netrin receptor UNC5B precursor	2.36135	1.23961	2.36135	up	chr10	+	72972297	73060749
NR_027341	C9orf44	-2.56209	-1.35732	2.56209	down	RefSeq_NR	2000	chr9	+	94903748	94921890	downstream	NM_017680	ASPN	asporin isoform 1 preproprotein	66.2644	6.05016	66.2644	up	chr9	-	95218488	95244844
uc002ubt.1	AK027541	-10.0696	-3.33194	10.0696	down	UCSC_knowngene	2013	chr2	+	162101249	162105241	upstream	NM_133484	TANK	TRAF family member-associated NF-kappa-B	2.13813	1.09635	2.13813	up	chr2	+	161993465	162061490
uc002qgt.1	BC131616	-4.58407	-2.19663	4.58407	down	UCSC_knowngene	2014	chr19	+	55219699	55224842	upstream	NM_021270	LAIR2	leukocyte-associated immunoglobulin-like	-2.85284	-1.5124	2.85284	down	chr19	+	55014012	55021900
uc002qgt.1	BC131616	-4.58407	-2.19663	4.58407	down	UCSC_knowngene	2014	chr19	+	55219699	55224842	downstream	NM_013289	KIR3DL1	killer cell immunoglobulin-like receptor 3DL1	-2.43431	-1.28351	2.43431	down	chr19	+	55327892	55342233
NR_027418	LOC651250	-2.31292	-1.20972	2.31292	down	RefSeq_NR	11210	chr17	+	66097695	66132068	upstream	NM_002266	KPNA2	importin subunit alpha-2	2.61554	1.38711	2.61554	up	chr17	+	66031847	66042970
uc004bqf.1	BC031239	-2.18231	-1.12586	2.18231	down	UCSC_knowngene	2096	chr9	-	129032402	129038194	upstream	NM_001011703	FAM125B	multivesicular body subunit 12B isoform 2	2.76124	1.46531	2.76124	up	chr9	+	129089127	129159912
NR_026951	C17orf44	-2.23202	-1.15835	2.23202	down	RefSeq_NR	2115	chr17	-	8123948	8127361	downstream	NM_014232	VAMP2	vesicle-associated membrane protein 2	-2.61821	-1.38858	2.61821	down	chr17	-	8062464	8066293
NR_026951	C17orf44	-2.23202	-1.15835	2.23202	down	RefSeq_NR	2115	chr17	-	8123948	8127361	upstream	NM_001177801	RANGRF	ran guanine nucleotide release factor isoform B	-4.4989	-2.16957	4.4989	down	chr17	+	8191968	8193409
NR_026951	C17orf44	-2.23202	-1.15835	2.23202	down	RefSeq_NR	2115	chr17	-	8123948	8127361	upstream	NM_000987	RPL26	60S ribosomal protein L26	2.20438	1.14037	2.20438	up	chr17	-	8280833	8286565
AK024410		8.00532	3.00096	8.00532	up	NRED	2133	chr20	-	37038939	37041070	upstream	NM_020336	RALGAPB	ral GTPase-activating protein subunit beta	7.97941	2.99628	7.97941	up	chr20	+	37101485	37207504
ENST00000430364	XXbac-BPG181B23.4	2.0543	1.03865	2.0543	up	Ensembl	2141	chr6	+	31409443	31414750	downstream	NM_001166538	LST1	leukocyte-specific transcript 1 protein isoform	-2.71424	-1.44055	2.71424	down	chr6	+	31554976	31556686
ENST00000430364	XXbac-BPG181B23.4	2.0543	1.03865	2.0543	up	Ensembl	2141	chr6	+	31409443	31414750	downstream	NM_001145466	NCR3	natural cytotoxicity triggering receptor 3	-2.87437	-1.52325	2.87437	down	chr6	-	31556659	31560762
ENST00000430364	XXbac-BPG181B23.4	2.0543	1.03865	2.0543	up	Ensembl	2141	chr6	+	31409443	31414750	downstream	NM_025262	LY6G5C	lymphocyte antigen 6 complex locus protein G5c	-4.15806	-2.05591	4.15806	down	chr6	-	31644460	31648150
NR_033370	LOC63930	-3.65208	-1.86872	3.65208	down	RefSeq_NR	3366	chr20	+	61640734	61716423	upstream	NM_007346	OGFR	opioid growth factor receptor	2.88811	1.53012	2.88811	up	chr20	+	61436176	61445352
NR_033370	LOC63930	-3.65208	-1.86872	3.65208	down	RefSeq_NR	3366	chr20	+	61640734	61716423	upstream	NM_022082	SLC17A9	solute carrier family 17 member 9	-6.26675	-2.64772	6.26675	down	chr20	+	61583998	61599949
NR_027029	MGC34034	-3.39994	-1.76551	3.39994	down	RefSeq_NR	3517	chr6	+	134142284	134175130	downstream	NM_198392	TCF21	transcription factor 21	-6.64937	-2.73322	6.64937	down	chr6	+	134210258	134216675
NR_027087	LOC284632	-18.8311	-4.23504	18.8311	down	RefSeq_NR	1863	chr1	+	24526729	24538180	upstream	NM_021258	IL22RA1	interleukin-22 receptor subunit alpha-1	-3.07515	-1.62066	3.07515	down	chr1	-	24446260	24469775
ENST00000466530	RP3-477O4.15	-2.23572	-1.16074	2.23572	down	Ensembl	3965	chr20	+	34101395	34105360	downstream	NM_003116	SPAG4	sperm-associated antigen 4 protein	-11.2588	-3.49298	11.2588	down	chr20	+	34203808	34208965
ENST00000326734	FAM87B	4.91233	2.29641	4.91233	up	Ensembl	1944	chr1	+	752750	755214	downstream	NM_152486	SAMD11	sterile alpha motif domain-containing protein	-4.54638	-2.18472	4.54638	down	chr1	+	861120	879961
ENST00000326734	FAM87B	4.91233	2.29641	4.91233	up	Ensembl	1944	chr1	+	752750	755214	downstream	NM_021170	HES4	transcription factor HES-4 isoform 2	3.57128	1.83644	3.57128	up	chr1	-	934341	935552
uc001yjz.1	AK094562	-3.16747	-1.66333	3.16747	down	UCSC_knowngene	2638	chr14	+	101536247	101539271	upstream	NM_001134888	RTL1	retrotransposon-like protein 1	-2.43959	-1.28664	2.43959	down	chr14	-	101346991	101351184
ENST00000433673	AC068282.3	10.0492	3.32901	10.0492	up	Ensembl	2690	chr2	+	128146705	128158156	upstream	NM_001001665	CYP27C1	cytochrome P450 27C1	4.25768	2.09007	4.25768	up	chr2	-	127941411	127963343
ENST00000458492	AC005224.2	3.07911	1.62251	3.07911	up	Ensembl	1537	chr17	+	14113804	14121239	upstream	NM_001303	COX10	protoheme IX farnesyltransferase, mitochondrial	2.22421	1.15329	2.22421	up	chr17	+	13972718	14111996
ENST00000458492	AC005224.2	3.07911	1.62251	3.07911	up	Ensembl	1537	chr17	+	14113804	14121239	downstream	NM_006041	HS3ST3B1	heparan sulfate glucosamine 3-O-sulfotransferase	-2.84593	-1.5089	2.84593	down	chr17	+	14204505	14249492
NR_027085	LOC284551	-2.65645	-1.4095	2.65645	down	RefSeq_NR	2741	chr1	+	31984035	31989846	upstream	NM_178865	SERINC2	serine incorporator 2 isoform 1	-4.3694	-2.12744	4.3694	down	chr1	+	31885962	31907527
NR_027085	LOC284551	-2.65645	-1.4095	2.65645	down	RefSeq_NR	2741	chr1	+	31984035	31989846	downstream	NM_144569	SPOCD1	SPOC domain-containing protein 1	9.76097	3.28702	9.76097	up	chr1	-	32256024	32281580
uc002the.2	LOC541471	2.23191	1.15828	2.23191	up	UCSC_knowngene	1583	chr2	-	111965358	112252692	downstream	NM_207002	BCL2L11	bcl-2-like protein 11 isoform 9	6.34247	2.66505	6.34247	up	chr2	+	111878490	111886423
uc002goc.1	AK123263	-5.77272	-2.52925	5.77272	down	UCSC_knowngene	2800	chr17	-	13680148	13695867	upstream	NM_001303	COX10	protoheme IX farnesyltransferase, mitochondrial	2.22421	1.15329	2.22421	up	chr17	+	13972718	14111996
NR_027036	LOC100271722	-2.05654	-1.04022	2.05654	down	RefSeq_NR	1625	chr22	-	46435788	46440748	downstream	NM_013236	ATXN10	ataxin-10 isoform 1	2.54225	1.3461	2.54225	up	chr22	+	46067677	46241187
NR_027036	LOC100271722	-2.05654	-1.04022	2.05654	down	RefSeq_NR	1625	chr22	-	46435788	46440748	upstream	NM_016426	GTSE1	G2 and S phase-expressed protein 1	2.22635	1.15468	2.22635	up	chr22	+	46692637	46726707
NR_027036	LOC100271722	-2.05654	-1.04022	2.05654	down	RefSeq_NR	1625	chr22	-	46435788	46440748	upstream	NM_018006	TRMU	mitochondrial tRNA-specific 2-thiouridylase 1	3.04911	1.60839	3.04911	up	chr22	+	46731297	46753237
uc001hwe.2	BC040195	-7.95593	-2.99203	7.95593	down	UCSC_knowngene	2856	chr1	-	234663637	234667522	downstream	NM_001012985	C1orf31	hypothetical protein LOC388753 isoform 1	2.08584	1.06063	2.08584	up	chr1	+	234509428	234519795
uc001jef.2	LOC643650	9.66581	3.27289	9.66581	up	UCSC_knowngene	2876	chr10	-	47096454	47151400	downstream	NM_014696	GPRIN2	G protein-regulated inducer of neurite outgrowth	-25.4839	-4.67151	25.4839	down	chr10	+	46993545	47000568
ENST00000423323	AC015842.1	-5.75688	-2.52529	5.75688	down	Ensembl	2998	chr17	-	13679950	13695867	upstream	NM_001303	COX10	protoheme IX farnesyltransferase, mitochondrial	2.22421	1.15329	2.22421	up	chr17	+	13972718	14111996
ENST00000446811	RP11-503C24.4	-4.5395	-2.18253	4.5395	down	Ensembl	2246	chr6	+	168643617	168663261	upstream	NM_030615	KIF25	kinesin-like protein KIF25 isoform 1	-3.23892	-1.69551	3.23892	down	chr6	+	168418552	168445769
uc001guz.2	EF413001	13.8254	3.78925	13.8254	up	UCSC_knowngene	2280	chr1	-	198867622	198906558	downstream	NM_002838	PTPRC	receptor-type tyrosine-protein phosphatase C	-3.01015	-1.58983	3.01015	down	chr1	+	198608136	198726545
ENST00000439050	AC009299.3	-12.0188	-3.58723	12.0188	down	Ensembl	2333	chr2	+	162101249	162105561	downstream	NM_005805	PSMD14	26S proteasome non-ATPase regulatory subunit 14	2.04396	1.03137	2.04396	up	chr2	+	162164785	162268226
BC045813		12.0152	3.58679	12.0152	up	RNAdb	1271	chr9	-	96938888	96966848	upstream	NM_032558	HIATL1	hippocampus abundant transcript-like 1	2.78366	1.47698	2.78366	up	chr9	+	97136832	97223202
uc002wrm.1	BC090059	-2.02429	-1.01742	2.02429	down	UCSC_knowngene	1294	chr20	+	19780217	19790937	upstream	NM_020689	SLC24A3	sodium/potassium/calcium exchanger 3 precursor	-2.47574	-1.30786	2.47574	down	chr20	+	19193289	19703541
uc002wrm.1	BC090059	-2.02429	-1.01742	2.02429	down	UCSC_knowngene	1294	chr20	+	19780217	19790937	downstream	NM_015585	C20orf26	hypothetical protein LOC26074 isoform 1	-8.06949	-3.01248	8.06949	down	chr20	+	20033157	20341346
AK092065		-2.45877	-1.29794	2.45877	down	RNAdb	2496	chr13	+	30918808	30921304	downstream	NM_005800	USPL1	ubiquitin-specific peptidase-like protein 1	2.00103	1.00074	2.00103	up	chr13	+	31191829	31233686
uc003ojj.2	CR624291	-2.01563	-1.01123	2.01563	down	UCSC_knowngene	2513	chr6	-	34247456	34249969	downstream	NM_145902	HMGA1	high mobility group protein HMG-I/HMG-Y isoform	3.90662	1.96592	3.90662	up	chr6	+	34204649	34214008
ENST00000417705	RP11-54O7.3	-23.9421	-4.58148	23.9421	down	Ensembl	1389	chr1	-	852249	855072	upstream	NM_005101	ISG15	ubiquitin-like protein ISG15 precursor	7.09086	2.82596	7.09086	up	chr1	+	948846	949919
ENST00000417705	RP11-54O7.3	-23.9421	-4.58148	23.9421	down	Ensembl	1389	chr1	-	852249	855072	upstream	NM_001130045	TTLL10	inactive polyglycylase TTLL10 isoform 1	-7.70291	-2.9454	7.70291	down	chr1	+	1109285	1133313
ENST00000417705	RP11-54O7.3	-23.9421	-4.58148	23.9421	down	Ensembl	1389	chr1	-	852249	855072	upstream	NM_153254	TTLL10	inactive polyglycylase TTLL10 isoform 2	-6.42606	-2.68394	6.42606	down	chr1	+	1115076	1121243
uc002ubt.1	AK027541	-10.0696	-3.33194	10.0696	down	UCSC_knowngene	2013	chr2	+	162101249	162105241	upstream	NM_004180	TANK	TRAF family member-associated NF-kappa-B	2.4423	1.28824	2.4423	up	chr2	+	161993465	162092682
uc002ubt.1	AK027541	-10.0696	-3.33194	10.0696	down	UCSC_knowngene	2013	chr2	+	162101249	162105241	downstream	NM_005805	PSMD14	26S proteasome non-ATPase regulatory subunit 14	2.04396	1.03137	2.04396	up	chr2	+	162164785	162268226
uc002qgt.1	BC131616	-4.58407	-2.19663	4.58407	down	UCSC_knowngene	2014	chr19	+	55219699	55224842	downstream	NM_133277	FCAR	immunoglobulin alpha Fc receptor isoform g	3.34196	1.7407	3.34196	up	chr19	+	55385548	55401839
uc002qgt.1	BC131616	-4.58407	-2.19663	4.58407	down	UCSC_knowngene	2014	chr19	+	55219699	55224842	downstream	NM_001145458	NCR1	natural cytotoxicity triggering receptor 1	2.17648	1.122	2.17648	up	chr19	+	55417507	55424439
uc004aiu.1	AK095210	-2.88112	-1.52663	2.88112	down	UCSC_knowngene	2078	chr9	+	74920351	74958126	downstream	NM_001102420	ZFAND5	AN1-type zinc finger protein 5	2.77924	1.47469	2.77924	up	chr9	-	74966340	74980163
uc004aiu.1	AK095210	-2.88112	-1.52663	2.88112	down	UCSC_knowngene	2078	chr9	+	74920351	74958126	downstream	NM_001102421	ZFAND5	AN1-type zinc finger protein 5	3.89568	1.96187	3.89568	up	chr9	-	74966340	74980163
NR_026951	C17orf44	-2.23202	-1.15835	2.23202	down	RefSeq_NR	2115	chr17	-	8123948	8127361	upstream	NM_201520	SLC25A35	solute carrier family 25 member 35	-3.32528	-1.73348	3.32528	down	chr17	-	8191081	8198170
NR_026951	C17orf44	-2.23202	-1.15835	2.23202	down	RefSeq_NR	2115	chr17	-	8123948	8127361	upstream	NM_016492	RANGRF	ran guanine nucleotide release factor isoform A	-2.67275	-1.41832	2.67275	down	chr17	+	8191968	8193409
ENST00000423943	RP11-48O20.4	-8.26514	-3.04704	8.26514	down	Ensembl	1113	chr1	+	159931013	159948851	upstream	NM_001134233	C1orf204	hypothetical protein LOC284677	-2.86495	-1.51851	2.86495	down	chr1	-	159804263	159825137
ENST00000423943	RP11-48O20.4	-8.26514	-3.04704	8.26514	down	Ensembl	1113	chr1	+	159931013	159948851	upstream	NM_001135050	IGSF9	protein turtle homolog A isoform a	-2.44013	-1.28696	2.44013	down	chr1	-	159896828	159915386
ENST00000417514	RP11-439L8.4	-3.92186	-1.97154	3.92186	down	Ensembl	1122	chr1	+	31987963	31989190	downstream	NM_144569	SPOCD1	SPOC domain-containing protein 1	9.76097	3.28702	9.76097	up	chr1	-	32256024	32281580
ENST00000416581	RP5-1109J22.2	-3.9688	-1.9887	3.9688	down	Ensembl	1129	chr1	-	46912344	46915376	downstream	NM_005727	TSPAN1	tetraspanin-1	-13.0976	-3.71123	13.0976	down	chr1	+	46640748	46651634
ENST00000416581	RP5-1109J22.2	-3.9688	-1.9887	3.9688	down	Ensembl	1129	chr1	-	46912344	46915376	downstream	NM_001441	FAAH	fatty-acid amide hydrolase 1	4.72796	2.24122	4.72796	up	chr1	+	46859938	46879520
NR_026951	C17orf44	-2.23202	-1.15835	2.23202	down	RefSeq_NR	2115	chr17	-	8123948	8127361	upstream	NM_030808	NDEL1	nuclear distribution protein nudE-like 1 isoform	-16.4012	-4.03573	16.4012	down	chr17	+	8339178	8371481
uc002qym.1	AK124409	-2.26783	-1.18131	2.26783	down	UCSC_knowngene	2130	chr2	-	6869300	6910442	upstream	NM_080657	RSAD2	radical S-adenosyl methionine domain-containing	14.5382	3.86178	14.5382	up	chr2	+	7017795	7038363
AK024410		8.00532	3.00096	8.00532	up	NRED	2133	chr20	-	37038939	37041070	downstream	NM_001725	BPI	bactericidal permeability-increasing protein	-2.29589	-1.19906	2.29589	down	chr20	+	36932551	36965905
ENST00000430364	XXbac-BPG181B23.4	2.0543	1.03865	2.0543	up	Ensembl	2141	chr6	+	31409443	31414750	upstream	NM_001077511	TCF19	transcription factor 19	-4.13083	-2.04643	4.13083	down	chr6	+	31126302	31131992
NR_026821	FAM138B	-2.26415	-1.17897	2.26415	down	RefSeq_NR	1130	chr2	+	114334958	114336428	downstream	NM_007082	RABL2A	rab-like protein 2A	-3.02059	-1.59483	3.02059	down	chr2	+	114384816	114400975
NR_026821	FAM138B	-2.26415	-1.17897	2.26415	down	RefSeq_NR	1130	chr2	+	114334958	114336428	downstream	NM_025181	SLC35F5	solute carrier family 35 member F5	2.22237	1.1521	2.22237	up	chr2	-	114471932	114514400
uc001kat.2	CR592318	-2.12239	-1.08569	2.12239	down	UCSC_knowngene	1146	chr10	-	81451255	81586183	downstream	NM_001099692	EIF5AL1	eukaryotic translation initiation factor	2.53101	1.33971	2.53101	up	chr10	+	81272356	81276192
ENST00000452153	AC115989.1	-4.07233	-2.02586	4.07233	down	Ensembl	1150	chr17	+	19532763	19537138	upstream	NM_007148	RNF112	RING finger protein 112	-5.74899	-2.52331	5.74899	down	chr17	+	19314490	19320589
ENST00000430364	XXbac-BPG181B23.4	2.0543	1.03865	2.0543	up	Ensembl	2141	chr6	+	31409443	31414750	downstream	NM_001145467	NCR3	natural cytotoxicity triggering receptor 3	-3.3323	-1.73652	3.3323	down	chr6	-	31557050	31560762
ENST00000430364	XXbac-BPG181B23.4	2.0543	1.03865	2.0543	up	Ensembl	2141	chr6	+	31409443	31414750	downstream	NM_004847	AIF1	allograft inflammatory factor 1 isoform 2	-2.17406	-1.12039	2.17406	down	chr6	+	31582993	31584798
ENST00000430364	XXbac-BPG181B23.4	2.0543	1.03865	2.0543	up	Ensembl	2141	chr6	+	31409443	31414750	downstream	NM_002441	MSH5	mutS protein homolog 5 isoform c	-2.40428	-1.2656	2.40428	down	chr6	+	31707724	31730455
ENST00000430364	XXbac-BPG181B23.4	2.0543	1.03865	2.0543	up	Ensembl	2141	chr6	+	31409443	31414750	downstream	NM_025259	MSH5	mutS protein homolog 5 isoform a	-2.56468	-1.35878	2.56468	down	chr6	+	31707724	31730455
ENST00000452153	AC115989.1	-4.07233	-2.02586	4.07233	down	Ensembl	1150	chr17	+	19532763	19537138	downstream	NM_000382	ALDH3A2	fatty aldehyde dehydrogenase isoform 2	-2.72093	-1.4441	2.72093	down	chr17	+	19552063	19580908
uc002rbr.2	CR593993	-4.2162	-2.07594	4.2162	down	UCSC_knowngene	1168	chr2	+	11821585	11823451	downstream	NM_145693	LPIN1	phosphatidate phosphatase LPIN1	2.05404	1.03846	2.05404	up	chr2	+	11886739	11967533
ENST00000417084	RP11-6J21.2	-3.37843	-1.75635	3.37843	down	Ensembl	917	chr1	+	207422411	207482466	downstream	NM_001877	CR2	complement receptor type 2 isoform 2 precursor	-53.5979	-5.74411	53.5979	down	chr1	+	207627644	207663240
ENST00000447557	RP1-287H17.1	-5.73691	-2.52027	5.73691	down	Ensembl	929	chr6	-	135027197	135028487	upstream	NM_001145158	HBS1L	HBS1-like protein isoform 2	2.98963	1.57997	2.98963	up	chr6	-	135281516	135376036
ENST00000447571	AC079807.4	12.1281	3.60028	12.1281	up	Ensembl	1808	chr2	-	48168834	48468122	upstream	NM_001135629	KLRAQ1	KLRAQ motif-containing protein 1 isoform 1	2.36213	1.24009	2.36213	up	chr2	+	48667907	48742531
NR_027087	LOC284632	-18.8311	-4.23504	18.8311	down	RefSeq_NR	1863	chr1	+	24526729	24538180	upstream	NM_017761	PNRC2	proline-rich nuclear receptor coactivator 2	2.7079	1.43717	2.7079	up	chr1	+	24286300	24289949
BC042185		2.27537	1.1861	2.27537	up	RNAdb	964	chr9	+	35646266	35647470	upstream	NM_001782	CD72	B-cell differentiation antigen CD72	-2.81006	-1.4906	2.81006	down	chr9	-	35609975	35618424
BC042185		2.27537	1.1861	2.27537	up	RNAdb	964	chr9	+	35646266	35647470	downstream	NM_032818	C9orf100	vav-like protein C9orf100	2.00592	1.00426	2.00592	up	chr9	-	35659340	35665278
ENST00000457725	AP003774.6	-4.03372	-2.01211	4.03372	down	Ensembl	985	chr11	-	64161813	64163303	downstream	NM_057092	FKBP2	peptidyl-prolyl cis-trans isomerase FKBP2	-4.81517	-2.26759	4.81517	down	chr11	+	64009587	64011607
ENST00000457725	AP003774.6	-4.03372	-2.01211	4.03372	down	Ensembl	985	chr11	-	64161813	64163303	downstream	NM_032251	CCDC88B	coiled-coil domain-containing protein 88B	-11.7564	-3.55538	11.7564	down	chr11	+	64107689	64125006
uc003qdd.2	AF086187	-2.33836	-1.2255	2.33836	down	UCSC_knowngene	990	chr6	+	132455117	132490502	upstream	NM_006208	ENPP1	ectonucleotide pyrophosphatase/phosphodiesterase	-2.69189	-1.42862	2.69189	down	chr6	+	132129155	132216295
NR_026762	C10orf75	2.63399	1.39725	2.63399	up	RefSeq_NR	1003	chr10	+	102133332	102148110	upstream	NM_018294	CWF19L1	CWF19-like protein 1	3.08025	1.62305	3.08025	up	chr10	-	101992054	102027437
NR_015410	FLJ22536	7.85231	2.97312	7.85231	up	RefSeq_NR	1904	chr6	+	21666674	22194614	upstream	NM_003107	SOX4	transcription factor SOX-4	3.61823	1.85528	3.61823	up	chr6	+	21593971	21598849
ENST00000326734	FAM87B	4.91233	2.29641	4.91233	up	Ensembl	1944	chr1	+	752750	755214	downstream	NM_032129	PLEKHN1	pleckstrin homology domain-containing family N	-2.04493	-1.03205	2.04493	down	chr1	+	901876	910484
ENST00000326734	FAM87B	4.91233	2.29641	4.91233	up	Ensembl	1944	chr1	+	752750	755214	downstream	NM_005101	ISG15	ubiquitin-like protein ISG15 precursor	7.09086	2.82596	7.09086	up	chr1	+	948846	949919
ENST00000450408	RP3-355C18.7	2.67719	1.42072	2.67719	up	Ensembl	1016	chr22	+	50427792	50431528	downstream	NM_001164104	MOV10L1	putative helicase Mov10l1 isoform 2	-2.61547	-1.38707	2.61547	down	chr22	+	50528434	50600116
ENST00000450408	RP3-355C18.7	2.67719	1.42072	2.67719	up	Ensembl	1016	chr22	+	50427792	50431528	downstream	NM_001160300	PANX2	pannexin-2 isoform 2	-2.40718	-1.26734	2.40718	down	chr22	+	50609159	50618724
ENST00000510784	AL160400.1	-2.45538	-1.29595	2.45538	down	Ensembl	1029	chr6	-	25015180	25042398	downstream	NM_014722	FAM65B	family with sequence similarity 65, member B	-5.27283	-2.39858	5.27283	down	chr6	-	24804512	24911195
AK055023		-2.23883	-1.16274	2.23883	down	misc_RNA	1974	chr10	-	72689681	72695453	downstream	NM_003901	SGPL1	sphingosine-1-phosphate lyase 1	2.31112	1.20859	2.31112	up	chr10	+	72575703	72640932
NR_027341	C9orf44	-2.56209	-1.35732	2.56209	down	RefSeq_NR	2000	chr9	+	94903748	94921890	upstream	NM_006415	SPTLC1	serine palmitoyltransferase 1 isoform a	2.15495	1.10765	2.15495	up	chr9	-	94793426	94877690
NR_027341	C9orf44	-2.56209	-1.35732	2.56209	down	RefSeq_NR	2000	chr9	+	94903748	94921890	downstream	NM_013417	IARS	isoleucyl-tRNA synthetase, cytoplasmic	2.48919	1.31567	2.48919	up	chr9	-	94972624	95055972
uc002xid.1	AX746690	2.04402	1.03141	2.04402	up	UCSC_knowngene	2002	chr20	-	37034659	37045444	downstream	NM_001725	BPI	bactericidal permeability-increasing protein	-2.29589	-1.19906	2.29589	down	chr20	+	36932551	36965905
ENST00000417705	RP11-54O7.3	-23.9421	-4.58148	23.9421	down	Ensembl	1389	chr1	-	852249	855072	upstream	NM_021170	HES4	transcription factor HES-4 isoform 2	3.57128	1.83644	3.57128	up	chr1	-	934341	935552
NR_002724	MBL1P	-2.01895	-1.01361	2.01895	down	RefSeq_NR	1424	chr10	+	81679933	81682875	downstream	NM_025125	C10orf57	transmembrane protein C10orf57	-2.16358	-1.11342	2.16358	down	chr10	+	81838425	81852307
ENST00000415195	XXbac-BPG249D20.9	-13.2712	-3.73023	13.2712	down	Ensembl	851	chr6	+	30484042	30486994	downstream	NM_001025091	ABCF1	ATP-binding cassette sub-family F member 1	3.54136	1.8243	3.54136	up	chr6	+	30539169	30559309
ENST00000415195	XXbac-BPG249D20.9	-13.2712	-3.73023	13.2712	down	Ensembl	851	chr6	+	30484042	30486994	downstream	NM_002714	PPP1R10	serine/threonine-protein phosphatase 1	17.2735	4.11049	17.2735	up	chr6	-	30568181	30585020
AK058075		-6.00802	-2.58689	6.00802	down	misc_RNA	1555	chr22	-	50226263	50231434	upstream	NM_001164104	MOV10L1	putative helicase Mov10l1 isoform 2	-2.61547	-1.38707	2.61547	down	chr22	+	50528434	50600116
NR_026883	HSPC072	2.25153	1.17091	2.25153	up	RefSeq_NR	1574	chr20	-	18768614	18775228	downstream	NM_032986	SEC23B	protein transport protein Sec23B isoform 1	2.68426	1.42452	2.68426	up	chr20	+	18488187	18542050
uc002the.2	LOC541471	2.23191	1.15828	2.23191	up	UCSC_knowngene	1583	chr2	-	111965358	112252692	downstream	NM_138621	BCL2L11	bcl-2-like protein 11 isoform 1	-2.52461	-1.33606	2.52461	down	chr2	+	111878490	111926022
ENST00000433357	RP11-255A11.21	-7.94171	-2.98945	7.94171	down	Ensembl	902	chr9	+	33602498	33605291	downstream	NM_002771	PRSS3	trypsin-3 isoform 2 preproprotein	-2.39639	-1.26086	2.39639	down	chr9	+	33795558	33799229
ENST00000449713	AP001065.15	-2.16209	-1.11243	2.16209	down	Ensembl	912	chr21	+	45905459	45910171	downstream	NM_198698	KRTAP12-4	keratin-associated protein 12-4	-2.19727	-1.13571	2.19727	down	chr21	-	46074129	46074576
ENST00000450456	GJE1	-2.00078	-1.00056	2.00078	down	Ensembl	913	chr6	+	142454226	142456288	downstream	NM_020455	GPR126	G-protein coupled receptor 126 alpha 1	-2.17481	-1.12089	2.17481	down	chr6	+	142623055	142767403
uc001kat.2	CR592318	-2.12239	-1.08569	2.12239	down	UCSC_knowngene	1146	chr10	-	81451255	81586183	upstream	NM_025125	C10orf57	transmembrane protein C10orf57	-2.16358	-1.11342	2.16358	down	chr10	+	81838425	81852307
ENST00000453174	MBL1P1	2.48108	1.31097	2.48108	up	Ensembl	818	chr10	+	81664653	81691557	downstream	NM_025125	C10orf57	transmembrane protein C10orf57	-2.16358	-1.11342	2.16358	down	chr10	+	81838425	81852307
uc002rzk.2	BC043355	-2.05906	-1.04199	2.05906	down	UCSC_knowngene	1275	chr2	+	56179292	56408787	upstream	NM_033109	PNPT1	polyribonucleotide nucleotidyltransferase 1,	11.0358	3.46413	11.0358	up	chr2	-	55861197	55921011
uc002wrm.1	BC090059	-2.02429	-1.01742	2.02429	down	UCSC_knowngene	1294	chr20	+	19780217	19790937	downstream	NM_001167816	C20orf26	hypothetical protein LOC26074 isoform 2	2.62251	1.39095	2.62251	up	chr20	+	20037289	20152977
ENST00000433572	RP11-542K23.7	-2.51824	-1.33242	2.51824	down	Ensembl	830	chr9	+	125165685	125211256	upstream	NM_080591	PTGS1	prostaglandin G/H synthase 1 isoform 2	-2.01488	-1.01069	2.01488	down	chr9	+	125133228	125157981
ENST00000426881	RP11-14O19.2	-6.45246	-2.68985	6.45246	down	Ensembl	1013	chr1	-	95821574	95846556	downstream	NM_152487	TMEM56	transmembrane protein 56	-18.0812	-4.17642	18.0812	down	chr1	+	95582893	95663161
ENST00000442214	AC104654.1	2.79238	1.4815	2.79238	up	Ensembl	741	chr2	+	42104695	42120186	downstream	NM_019063	EML4	echinoderm microtubule-associated protein-like 4	-2.60306	-1.38021	2.60306	down	chr2	+	42396489	42559688
ENST00000468538	RP1-149M18.4	-3.2019	-1.67893	3.2019	down	Ensembl	743	chr6	+	41373556	41374299	upstream	NM_018643	TREM1	triggering receptor expressed on myeloid cells 1	28.8115	4.84857	28.8115	up	chr6	-	41243711	41254457
ENST00000510784	AL160400.1	-2.45538	-1.29595	2.45538	down	Ensembl	1029	chr6	-	25015180	25042398	downstream	NM_015895	GMNN	geminin	4.49011	2.16675	4.49011	up	chr6	+	24775163	24786278
ENST00000449954	AL078621.3	-8.01706	-3.00307	8.01706	down	Ensembl	745	chr2	+	114270039	114273062	downstream	NM_013412	RABL2A	rab-like protein 2A	-3.36998	-1.75274	3.36998	down	chr2	+	114384816	114400975
ENST00000424605	RP11-125B21.2	2.53494	1.34195	2.53494	up	Ensembl	746	chr9	-	2535651	2570754	upstream	NM_001018056	VLDLR	very low-density lipoprotein receptor isoform b	3.05809	1.61263	3.05809	up	chr9	+	2621792	2654485
ENST00000437920	RP1-148H17.1	-3.96025	-1.98559	3.96025	down	Ensembl	750	chr20	-	46020672	46041071	downstream	NM_172110	EYA2	eyes absent homolog 2 isoform c	-2.32896	-1.21969	2.32896	down	chr20	+	45523262	45817492
ENST00000366185	RP11-258C19.5	6.37109	2.67154	6.37109	up	Ensembl	1063	chrX	+	53123338	53171889	downstream	NM_144968	RIBC1	RIB43A-like with coiled-coils protein 1 isoform	-6.01517	-2.5886	6.01517	down	chrX	+	53449838	53456776
ENST00000438217	XX-C2158C12.2	-2.54823	-1.3495	2.54823	down	Ensembl	758	chr6	+	171034284	171037576	upstream	NM_001172085	TBP	TATA-box-binding protein isoform 2	3.14939	1.65507	3.14939	up	chr6	+	170863420	170881958
ENST00000444079	AC093326.3	-5.89231	-2.55883	5.89231	down	Ensembl	762	chr2	+	558203	578145	upstream	NM_004300	ACP1	low molecular weight phosphotyrosine protein	2.15419	1.10715	2.15419	up	chr2	+	264868	278282
ENST00000444079	AC093326.3	-5.89231	-2.55883	5.89231	down	Ensembl	762	chr2	+	558203	578145	upstream	NM_007099	ACP1	low molecular weight phosphotyrosine protein	2.93261	1.55219	2.93261	up	chr2	+	264868	278282
ENST00000420807	RP11-452J13.1	-4.05381	-2.01928	4.05381	down	Ensembl	779	chr1	+	193273874	193335083	upstream	NM_001173525	TROVE2	60 kDa SS-A/Ro ribonucleoprotein isoform 4	7.87458	2.9772	7.87458	up	chr1	+	193029003	193060906
ENST00000420807	RP11-452J13.1	-4.05381	-2.01928	4.05381	down	Ensembl	779	chr1	+	193273874	193335083	upstream	NM_024529	CDC73	parafibromin	3.58027	1.84007	3.58027	up	chr1	+	193091087	193223942
ENST00000423943	RP11-48O20.4	-8.26514	-3.04704	8.26514	down	Ensembl	1113	chr1	+	159931013	159948851	upstream	NM_001004310	FCRL6	Fc receptor-like protein 6 precursor	-16.6717	-4.05933	16.6717	down	chr1	+	159772172	159786047
ENST00000423943	RP11-48O20.4	-8.26514	-3.04704	8.26514	down	Ensembl	1113	chr1	+	159931013	159948851	upstream	NM_020789	IGSF9	protein turtle homolog A isoform b	-2.04933	-1.03515	2.04933	down	chr1	-	159896828	159915386
ENST00000423943	RP11-48O20.4	-8.26514	-3.04704	8.26514	down	Ensembl	1113	chr1	+	159931013	159948851	downstream	NM_000702	ATP1A2	sodium/potassium-transporting ATPase subunit	-18.6743	-4.22298	18.6743	down	chr1	+	160085519	160113374
ENST00000423943	RP11-48O20.4	-8.26514	-3.04704	8.26514	down	Ensembl	1113	chr1	+	159931013	159948851	downstream	NM_002857	PEX19	peroxisomal biogenesis factor 19 isoform a	4.92382	2.29978	4.92382	up	chr1	-	160246598	160254941
ENST00000417514	RP11-439L8.4	-3.92186	-1.97154	3.92186	down	Ensembl	1122	chr1	+	31987963	31989190	upstream	NM_178865	SERINC2	serine incorporator 2 isoform 1	-4.3694	-2.12744	4.3694	down	chr1	+	31885962	31907527
ENST00000477499	AC108004.2	2.64489	1.40321	2.64489	up	Ensembl	787	chr17	-	33614	37038	upstream	NM_001013672	C17orf97	hypothetical protein LOC400566	-3.36682	-1.75139	3.36682	down	chr17	+	260117	264457
ENST00000449990	RP11-555F9.2	-2.21517	-1.14742	2.21517	down	Ensembl	791	chr9	-	93225940	93345026	upstream	NM_017594	DIRAS2	GTP-binding protein Di-Ras2	-6.66347	-2.73627	6.66347	down	chr9	-	93372113	93405108
ENST00000438722	AC018737.3	-3.33452	-1.73748	3.33452	down	Ensembl	794	chr2	+	122548019	122554278	upstream	NM_004622	TSN	translin	2.47713	1.30867	2.47713	up	chr2	+	122513120	122525428
ENST00000455039	RP11-426A6.7	-2.78489	-1.47762	2.78489	down	Ensembl	795	chr9	+	138359933	138364095	downstream	NM_001048265	C9orf116	hypothetical protein LOC138162 isoform 1	-11.8589	-3.56789	11.8589	down	chr9	-	138387025	138391761
ENST00000416581	RP5-1109J22.2	-3.9688	-1.9887	3.9688	down	Ensembl	1129	chr1	-	46912344	46915376	downstream	NM_003579	RAD54L	DNA repair and recombination protein RAD54-like	7.70689	2.94615	7.70689	up	chr1	+	46713366	46744145
ENST00000416581	RP5-1109J22.2	-3.9688	-1.9887	3.9688	down	Ensembl	1129	chr1	-	46912344	46915376	upstream	NM_147192	DMBX1	diencephalon/mesencephalon homeobox protein 1	2.12507	1.08751	2.12507	up	chr1	+	46972667	46979886
NR_026821	FAM138B	-2.26415	-1.17897	2.26415	down	RefSeq_NR	1130	chr2	+	114334958	114336428	downstream	NM_013412	RABL2A	rab-like protein 2A	-3.36998	-1.75274	3.36998	down	chr2	+	114384816	114400975
ENST00000449457	RP11-445P17.8	-2.72786	-1.44777	2.72786	down	Ensembl	692	chr10	-	5307995	5313199	downstream	NM_001818	AKR1C4	aldo-keto reductase family 1 member C4	-13.873	-3.79421	13.873	down	chr10	+	5238797	5260910
ENST00000449457	RP11-445P17.8	-2.72786	-1.44777	2.72786	down	Ensembl	692	chr10	-	5307995	5313199	upstream	NM_005863	NET1	neuroepithelial cell-transforming gene 1 protein	8.69061	3.11946	8.69061	up	chr10	+	5488545	5500426
ENST00000449713	AP001065.15	-2.16209	-1.11243	2.16209	down	Ensembl	912	chr21	+	45905459	45910171	upstream	NM_004928	C21orf2	hypothetical protein LOC755	-2.40452	-1.26575	2.40452	down	chr21	-	45748826	45759285
ENST00000417084	RP11-6J21.2	-3.37843	-1.75635	3.37843	down	Ensembl	917	chr1	+	207422411	207482466	upstream	NM_001018053	PFKFB2	6-phosphofructo-2-kinase/fructose-2,	-2.01611	-1.01158	2.01611	down	chr1	+	207226619	207254368
ENST00000439776	RP11-144G6.10	4.69995	2.23264	4.69995	up	Ensembl	709	chr10	-	47279191	47289833	downstream	NM_014696	GPRIN2	G protein-regulated inducer of neurite outgrowth	-25.4839	-4.67151	25.4839	down	chr10	+	46993545	47000568
ENST00000414398	HCG24	-2.25613	-1.17385	2.25613	down	Ensembl	717	chr6	+	33112559	33115544	downstream	NM_003782	B3GALT4	beta-1,3-galactosyltransferase 4	-3.85962	-1.94846	3.85962	down	chr6	+	33244916	33246602
ENST00000414398	HCG24	-2.25613	-1.17385	2.25613	down	Ensembl	717	chr6	+	33112559	33115544	downstream	NM_005452	WDR46	WD repeat-containing protein 46 isoform 1	2.51218	1.32894	2.51218	up	chr6	-	33246879	33257304
ENST00000447557	RP1-287H17.1	-5.73691	-2.52027	5.73691	down	Ensembl	929	chr6	-	135027197	135028487	upstream	NM_006620	HBS1L	HBS1-like protein isoform 1	2.56288	1.35777	2.56288	up	chr6	-	135281516	135376036
ENST00000450860	RP5-1091N2.9	-4.24707	-2.08647	4.24707	down	Ensembl	726	chrX	-	70403408	70418025	upstream	NM_001171163	ZMYM3	zinc finger MYM-type protein 3 isoform 3	2.13742	1.09587	2.13742	up	chrX	-	70469054	70474499
BC042185		2.27537	1.1861	2.27537	up	RNAdb	964	chr9	+	35646266	35647470	upstream	NM_006377	UNC13B	protein unc-13 homolog B	3.09059	1.62788	3.09059	up	chr9	+	35161988	35405332
BC042185		2.27537	1.1861	2.27537	up	RNAdb	964	chr9	+	35646266	35647470	upstream	NM_001164310	FAM166B	hypothetical protein LOC730112 isoform 1	-3.08981	-1.62752	3.08981	down	chr9	-	35561944	35563896
BC042185		2.27537	1.1861	2.27537	up	RNAdb	964	chr9	+	35646266	35647470	downstream	NM_213674	TPM2	tropomyosin beta chain isoform 2	2.8849	1.52852	2.8849	up	chr9	-	35681989	35690053
BC042185		2.27537	1.1861	2.27537	up	RNAdb	964	chr9	+	35646266	35647470	downstream	NM_006289	TLN1	talin-1	2.90087	1.53648	2.90087	up	chr9	-	35697333	35732392
ENST00000457725	AP003774.6	-4.03372	-2.01211	4.03372	down	Ensembl	985	chr11	-	64161813	64163303	downstream	NM_031471	FERMT3	fermitin family homolog 3 short form	-3.43628	-1.78085	3.43628	down	chr11	+	63974151	63991363
ENST00000457725	AP003774.6	-4.03372	-2.01211	4.03372	down	Ensembl	985	chr11	-	64161813	64163303	downstream	NM_003377	VEGFB	vascular endothelial growth factor B precursor	-2.08113	-1.05737	2.08113	down	chr11	+	64002265	64006259
ENST00000457725	AP003774.6	-4.03372	-2.01211	4.03372	down	Ensembl	985	chr11	-	64161813	64163303	downstream	NM_001177358	GPR137	integral membrane protein GPR137 isoform 5	2.37019	1.245	2.37019	up	chr11	+	64052282	64056972
ENST00000457725	AP003774.6	-4.03372	-2.01211	4.03372	down	Ensembl	985	chr11	-	64161813	64163303	downstream	NM_001170880	GPR137	integral membrane protein GPR137 isoform 2	2.18383	1.12686	2.18383	up	chr11	+	64053581	64056972
NR_026762	C10orf75	2.63399	1.39725	2.63399	up	RefSeq_NR	1003	chr10	+	102133332	102148110	downstream	NM_003393	WNT8B	protein Wnt-8b precursor	-2.38627	-1.25476	2.38627	down	chr10	+	102222811	102243399
NR_015395	LOC541471	2.08045	1.0569	2.08045	up	RefSeq_NR	809	chr2	-	112124590	112252692	downstream	NM_207002	BCL2L11	bcl-2-like protein 11 isoform 9	6.34247	2.66505	6.34247	up	chr2	+	111878490	111886423
ENST00000431157	RP11-354E11.2	-26.7976	-4.74403	26.7976	down	Ensembl	823	chr10	-	20010625	20017479	upstream	NM_032812	PLXDC2	plexin domain-containing protein 2 precursor	2.598	1.3774	2.598	up	chr10	+	20105371	20569115
ENST00000433572	RP11-542K23.7	-2.51824	-1.33242	2.51824	down	Ensembl	830	chr9	+	125165685	125211256	upstream	NM_033117	RBM18	probable RNA-binding protein 18	2.22955	1.15675	2.22955	up	chr9	-	125001833	125027143
ENST00000418764	AC004543.2	-3.14582	-1.65344	3.14582	down	Ensembl	655	chr7	-	19853307	19871039	downstream	NM_001002926	TWISTNB	DNA-directed RNA polymerase I subunit RPA43	3.29589	1.72067	3.29589	up	chr7	-	19735084	19748660
ENST00000426575	RP11-318C24.2	-2.26099	-1.17695	2.26099	down	Ensembl	657	chr1	-	175873897	175889649	downstream	NM_003285	TNR	tenascin-R precursor	2.24636	1.16759	2.24636	up	chr1	-	175291934	175712752
ENST00000445963	RP11-395E19.7	-48.8305	-5.60971	48.8305	down	Ensembl	847	chr9	-	40740775	40742447	upstream	NM_033160	ZNF658	zinc finger protein 658	2.11239	1.07887	2.11239	up	chr9	-	40771401	40792112
ENST00000448058	RP11-17H4.2	-7.90005	-2.98186	7.90005	down	Ensembl	597	chr1	-	231727037	231747836	downstream	NM_022051	EGLN1	egl nine homolog 1	3.18751	1.67243	3.18751	up	chr1	-	231499496	231560790
ENST00000454160	RP11-54A22.2	-2.34971	-1.23249	2.34971	down	Ensembl	599	chr9	+	137519675	137521252	downstream	NM_004108	FCN2	ficolin-2 isoform a precursor	-7.58949	-2.924	7.58949	down	chr9	+	137772657	137779366
ENST00000455966	RP1-224A6.3	-2.31358	-1.21012	2.31358	down	Ensembl	615	chr1	-	22350486	22351461	upstream	NM_044472	CDC42	cell division control protein 42 homolog isoform	-2.53408	-1.34146	2.53408	down	chr1	+	22379119	22417296
ENST00000420807	RP11-452J13.1	-4.05381	-2.01928	4.05381	down	Ensembl	779	chr1	+	193273874	193335083	upstream	NM_001042369	TROVE2	60 kDa SS-A/Ro ribonucleoprotein isoform 1	5.35682	2.42138	5.35682	up	chr1	+	193029003	193060906
ENST00000420807	RP11-452J13.1	-4.05381	-2.01928	4.05381	down	Ensembl	779	chr1	+	193273874	193335083	upstream	NM_001042370	TROVE2	60 kDa SS-A/Ro ribonucleoprotein isoform 3	2.95821	1.56472	2.95821	up	chr1	+	193029003	193060906
ENST00000437559	RP11-456H18.2	-2.26014	-1.17641	2.26014	down	Ensembl	784	chr6	+	12007902	12009089	downstream	NM_002114	HIVEP1	zinc finger protein 40	4.0901	2.03214	4.0901	up	chr6	+	12012723	12165232
ENST00000436706	RP11-365O16.3	-2.91968	-1.54581	2.91968	down	Ensembl	790	chr1	-	224396448	224400981	downstream	NM_015176	FBXO28	F-box only protein 28 isoform a	3.13059	1.64644	3.13059	up	chr1	+	224301790	224349749
ENST00000427890	RP11-101P17.6	8.21516	3.03829	8.21516	up	Ensembl	621	chr13	+	21834167	21867568	upstream	NM_005870	SAP18	histone deacetylase complex subunit SAP18	-2.40512	-1.26611	2.40512	down	chr13	+	21714652	21723224
ENST00000427890	RP11-101P17.6	8.21516	3.03829	8.21516	up	Ensembl	621	chr13	+	21834167	21867568	upstream	NM_024026	MRP63	ribosomal protein 63, mitochondrial	-2.3969	-1.26117	2.3969	down	chr13	+	21750371	21753220
ENST00000442197	AL132709.9	2.2077	1.14254	2.2077	up	Ensembl	625	chr14	+	101427363	101433377	upstream	NM_003836	DLK1	protein delta homolog 1 precursor	-2.25759	-1.17478	2.25759	down	chr14	+	101193201	101201467
ENST00000424215	RP3-395M20.9	-4.62894	-2.21068	4.62894	down	Ensembl	626	chr1	+	2512998	2515972	upstream	NM_024848	MORN1	MORN repeat-containing protein 1	-2.04185	-1.02988	2.04185	down	chr1	-	2252695	2322993
ENST00000415702	CTA-397C4.2	-2.21365	-1.14642	2.21365	down	Ensembl	630	chr22	+	44839206	44840668	upstream	NM_022141	PARVG	gamma-parvin	-5.57444	-2.47883	5.57444	down	chr22	+	44576769	44603035
ENST00000414488	AL132709.5	4.09434	2.03363	4.09434	up	Ensembl	800	chr14	+	101415314	101424887	upstream	NM_003836	DLK1	protein delta homolog 1 precursor	-2.25759	-1.17478	2.25759	down	chr14	+	101193201	101201467
ENST00000451118	WI2-85898F10.1	-2.19522	-1.13436	2.19522	down	Ensembl	805	chr22	-	46271878	46283628	downstream	NM_001167621	ATXN10	ataxin-10 isoform 2	3.61395	1.85357	3.61395	up	chr22	+	46067677	46241187
ENST00000425089	RP11-524H19.2	3.33801	1.73899	3.33801	up	Ensembl	586	chr6	-	54704915	54705653	upstream	NM_001010872	FAM83B	hypothetical protein LOC222584	2.97	1.57046	2.97	up	chr6	+	54711568	54806819
ENST00000452181	RP1-90G24.6	-9.95987	-3.31613	9.95987	down	Ensembl	590	chr22	+	32669406	32673173	upstream	NM_001159546	RFPL2	ret finger protein-like 2 isoform 3	-3.89437	-1.96139	3.89437	down	chr22	-	32586421	32598537
ENST00000449457	RP11-445P17.8	-2.72786	-1.44777	2.72786	down	Ensembl	692	chr10	-	5307995	5313199	downstream	NM_001353	AKR1C1	aldo-keto reductase family 1 member C1	-37.1991	-5.21719	37.1991	down	chr10	+	5005453	5020158
ENST00000449457	RP11-445P17.8	-2.72786	-1.44777	2.72786	down	Ensembl	692	chr10	-	5307995	5313199	downstream	NM_003739	AKR1C3	aldo-keto reductase family 1 member C3	-7.05646	-2.81894	7.05646	down	chr10	+	5136567	5149878
ENST00000451066	AC009473.1	-4.45925	-2.1568	4.45925	down	Ensembl	692	chr7	-	7989483	7990340	upstream	NM_138426	GLCCI1	glucocorticoid-induced transcript 1 protein	-4.37455	-2.12914	4.37455	down	chr7	+	8008422	8128709
ENST00000432530	RP11-258F22.1	-2.46806	-1.30338	2.46806	down	Ensembl	712	chr10	-	38064298	38073059	upstream	NM_021045	ZNF248	zinc finger protein 248	2.49035	1.31635	2.49035	up	chr10	-	38117898	38146486
ENST00000432530	RP11-258F22.1	-2.46806	-1.30338	2.46806	down	Ensembl	712	chr10	-	38064298	38073059	upstream	NM_145011	ZNF25	zinc finger protein 25	3.01615	1.59271	3.01615	up	chr10	-	38238794	38265453
ENST00000411780	RP11-425M5.5	-4.064	-2.0229	4.064	down	Ensembl	714	chr20	-	36120873	36137633	downstream	NM_001135771	RPN2	dolichyl-diphosphooligosaccharide--protein	3.12003	1.64156	3.12003	up	chr20	+	35807455	35870025
ENST00000411780	RP11-425M5.5	-4.064	-2.0229	4.064	down	Ensembl	714	chr20	-	36120873	36137633	downstream	NM_002951	RPN2	dolichyl-diphosphooligosaccharide--protein	2.16462	1.11411	2.16462	up	chr20	+	35807455	35870025
ENST00000451101	AC019172.2	-10.7104	-3.42094	10.7104	down	Ensembl	717	chr2	+	3891773	3895001	upstream	NM_018436	ALLC	probable allantoicase isoform a	-2.66057	-1.41173	2.66057	down	chr2	+	3705785	3750260
ENST00000414398	HCG24	-2.25613	-1.17385	2.25613	down	Ensembl	717	chr6	+	33112559	33115544	downstream	NM_080681	COL11A2	collagen alpha-2(XI) chain isoform 2	-2.50896	-1.32709	2.50896	down	chr6	-	33130468	33160245
ENST00000414398	HCG24	-2.25613	-1.17385	2.25613	down	Ensembl	717	chr6	+	33112559	33115544	downstream	NM_014234	HSD17B8	estradiol 17-beta-dehydrogenase 8	-2.5651	-1.35901	2.5651	down	chr6	+	33172418	33174607
ENST00000438772	AC036222.1	2.11264	1.07905	2.11264	up	Ensembl	595	chr17	-	46710868	46724152	upstream	NM_001002027	ATP5G1	ATP synthase lipid-binding protein,	4.73194	2.24243	4.73194	up	chr17	+	46970147	46973232
ENST00000450860	RP5-1091N2.9	-4.24707	-2.08647	4.24707	down	Ensembl	726	chrX	-	70403408	70418025	downstream	NM_001025265	CXorf65	hypothetical protein LOC158830	-19.1554	-4.25968	19.1554	down	chrX	-	70323738	70326638
ENST00000450860	RP5-1091N2.9	-4.24707	-2.08647	4.24707	down	Ensembl	726	chrX	-	70403408	70418025	downstream	NM_005120	MED12	mediator of RNA polymerase II transcription	-5.07986	-2.34479	5.07986	down	chrX	+	70338405	70362304
ENST00000450860	RP5-1091N2.9	-4.24707	-2.08647	4.24707	down	Ensembl	726	chrX	-	70403408	70418025	upstream	NM_001145409	NONO	non-POU domain-containing octamer-binding	7.61706	2.92923	7.61706	up	chrX	+	70503041	70521018
ENST00000450860	RP5-1091N2.9	-4.24707	-2.08647	4.24707	down	Ensembl	726	chrX	-	70403408	70418025	upstream	NM_004606	TAF1	transcription initiation factor TFIID subunit 1	-2.05167	-1.0368	2.05167	down	chrX	+	70586113	70685855
ENST00000426204	RP11-202G18.1	9.35086	3.2251	9.35086	up	Ensembl	744	chr9	-	113901525	114047116	upstream	NM_001146108	PTGR1	prostaglandin reductase 1 isoform 1	-2.52904	-1.33859	2.52904	down	chr9	-	114325246	114362135
ENST00000424605	RP11-125B21.2	2.53494	1.34195	2.53494	up	Ensembl	746	chr9	-	2535651	2570754	upstream	NM_014878	KIAA0020	KIAA0020 protein	3.07469	1.62044	3.07469	up	chr9	-	2804154	2844130
ENST00000448327	RP11-345L23.1	-11.9559	-3.57965	11.9559	down	Ensembl	566	chr6	+	53493177	53496192	upstream	NM_021814	ELOVL5	elongation of very long chain fatty acids	3.33375	1.73714	3.33375	up	chr6	-	53132195	53213942
ENST00000446884	RP1-30G7.2	-2.93329	-1.55252	2.93329	down	Ensembl	626	chrX	-	46185358	46187080	upstream	NM_001129899	ZNF673	protein ZNF673 isoform 3	2.78091	1.47556	2.78091	up	chrX	+	46306623	46334074
uc001lln.2	AF086154	-3.71622	-1.89383	3.71622	down	UCSC_knowngene	632	chr10	-	134325131	134331695	downstream	NM_001143758	LRRC27	leucine-rich repeat-containing protein 27	-2.16251	-1.11271	2.16251	down	chr10	+	134145613	134166901
uc001lln.2	AF086154	-3.71622	-1.89383	3.71622	down	UCSC_knowngene	632	chr10	-	134325131	134331695	downstream	NM_001143757	LRRC27	leucine-rich repeat-containing protein 27	-2.78873	-1.47961	2.78873	down	chr10	+	134145740	134195010
ENST00000452336	RP4-530I15.6	-6.02748	-2.59155	6.02748	down	Ensembl	638	chr20	+	49262007	49276828	downstream	NM_017843	BCAS4	breast carcinoma-amplified sequence 4 isoform a	2.03464	1.02478	2.03464	up	chr20	+	49411466	49493714
ENST00000452336	RP4-530I15.6	-6.02748	-2.59155	6.02748	down	Ensembl	638	chr20	+	49262007	49276828	downstream	NM_015339	ADNP	activity-dependent neuroprotector homeobox	4.57071	2.19242	4.57071	up	chr20	-	49506882	49547527
ENST00000441638	AP002856.7	3.75124	1.90737	3.75124	up	Ensembl	569	chr11	+	131104432	131121711	downstream	NM_001048209	NTM	neurotrimin isoform 2	-2.59805	-1.37743	2.59805	down	chr11	+	131240370	132206716
ENST00000488578	RP4-565E6.1	-2.172	-1.11903	2.172	down	Ensembl	669	chr1	-	146093233	146130539	downstream	NM_001101663	NBPF24	hypothetical protein LOC728912	2.8802	1.52617	2.8802	up	chr1	-	146034018	146068245
ENST00000430537	AC007036.6	-2.05338	-1.038	2.05338	down	Ensembl	674	chr7	-	30216002	30218630	downstream	NM_152793	C7orf41	hypothetical protein LOC222166	-2.95699	-1.56413	2.95699	down	chr7	+	30174551	30202381
ENST00000450671	RP3-475N16.1	-4.12139	-2.04313	4.12139	down	Ensembl	679	chr6	+	42908101	42911708	upstream	NM_198486	RPL7L1	60S ribosomal protein L7-like 1	3.52519	1.8177	3.52519	up	chr6	+	42847670	42854731
ENST00000450671	RP3-475N16.1	-4.12139	-2.04313	4.12139	down	Ensembl	679	chr6	+	42908101	42911708	upstream	NM_138296	PTCRA	pre T-cell antigen receptor alpha precursor	-23.9872	-4.58419	23.9872	down	chr6	+	42883726	42893575
ENST00000450671	RP3-475N16.1	-4.12139	-2.04313	4.12139	down	Ensembl	679	chr6	+	42908101	42911708	downstream	NM_057161	KLHDC3	kelch domain-containing protein 3 isoform 1	3.89765	1.96261	3.89765	up	chr6	+	42981976	42989031
ENST00000450671	RP3-475N16.1	-4.12139	-2.04313	4.12139	down	Ensembl	679	chr6	+	42908101	42911708	downstream	NM_032538	TTBK1	tau-tubulin kinase 1	3.32568	1.73365	3.32568	up	chr6	+	43211221	43255997
ENST00000438772	AC036222.1	2.11264	1.07905	2.11264	up	Ensembl	595	chr17	-	46710868	46724152	downstream	NM_001075099	SKAP1	src kinase-associated phosphoprotein 1 isoform	-8.13735	-3.02456	8.13735	down	chr17	-	46210801	46507594
ENST00000438772	AC036222.1	2.11264	1.07905	2.11264	up	Ensembl	595	chr17	-	46710868	46724152	upstream	NM_005175	ATP5G1	ATP synthase lipid-binding protein,	6.95822	2.79872	6.95822	up	chr17	+	46970147	46973232
ENST00000450784	RP11-452F19.3	2.00558	1.00402	2.00558	up	Ensembl	543	chr1	+	222988363	223010726	upstream	NM_144695	BROX	BRO1 domain-containing protein BROX	3.92115	1.97128	3.92115	up	chr1	+	222885905	222906106
ENST00000391359	RP1-122K4.3	-7.77177	-2.95824	7.77177	down	Ensembl	544	chrX	-	13998184	14006939	downstream	NM_001001994	GPM6B	neuronal membrane glycoprotein M6-b isoform 4	-2.27383	-1.18512	2.27383	down	chrX	-	13792092	13956831
ENST00000448058	RP11-17H4.2	-7.90005	-2.98186	7.90005	down	Ensembl	597	chr1	-	231727037	231747836	downstream	NM_032018	C1orf124	zinc finger RAD18 domain-containing protein	2.32114	1.21484	2.32114	up	chr1	+	231473681	231489989
ENST00000449621	AC105393.2	8.53007	3.09256	8.53007	up	Ensembl	598	chr2	+	421132	422303	upstream	NM_004300	ACP1	low molecular weight phosphotyrosine protein	2.15419	1.10715	2.15419	up	chr2	+	264868	278282
ENST00000449621	AC105393.2	8.53007	3.09256	8.53007	up	Ensembl	598	chr2	+	421132	422303	upstream	NM_007099	ACP1	low molecular weight phosphotyrosine protein	2.93261	1.55219	2.93261	up	chr2	+	264868	278282
ENST00000437967	AC006037.2	-2.82456	-1.49803	2.82456	down	Ensembl	598	chr2	+	235017359	235018125	upstream	NM_024080	TRPM8	transient receptor potential cation channel	2.02267	1.01626	2.02267	up	chr2	+	234826042	234928166
ENST00000437967	AC006037.2	-2.82456	-1.49803	2.82456	down	Ensembl	598	chr2	+	235017359	235018125	upstream	NM_006944	SPP2	secreted phosphoprotein 24 precursor	-2.04141	-1.02957	2.04141	down	chr2	+	234959345	234985776
ENST00000454160	RP11-54A22.2	-2.34971	-1.23249	2.34971	down	Ensembl	599	chr9	+	137519675	137521252	downstream	NM_015837	FCN2	ficolin-2 isoform b precursor	7.11295	2.83045	7.11295	up	chr9	+	137772657	137779366
uc004fnm.2	U00684	2.04968	1.0354	2.04968	up	UCSC_knowngene	552	chrX	+	154697946	154716706	upstream	NM_001007523	F8A2	factor VIII intron 22 protein	-2.66608	-1.41472	2.66608	down	chrX	+	154611763	154612879
NR_026816	PSORS1C3	-3.42746	-1.77714	3.42746	down	RefSeq_NR	600	chr6	-	31141511	31145676	downstream	NM_001010909	MUC21	mucin-21 precursor	-14.2611	-3.83402	14.2611	down	chr6	+	30951484	30957675
NR_026816	PSORS1C3	-3.42746	-1.77714	3.42746	down	RefSeq_NR	600	chr6	-	31141511	31145676	downstream	NM_014070	C6orf15	STG protein precursor	-3.95882	-1.98507	3.95882	down	chr6	-	31078999	31080332
NR_026816	PSORS1C3	-3.42746	-1.77714	3.42746	down	RefSeq_NR	600	chr6	-	31141511	31145676	downstream	NM_001077511	TCF19	transcription factor 19	-4.13083	-2.04643	4.13083	down	chr6	+	31126302	31131992
ENST00000422405	RP11-318G21.3	-8.80349	-3.13808	8.80349	down	Ensembl	601	chr13	+	78402356	78408085	upstream	NM_003843	SCEL	sciellin isoform 2	-4.41082	-2.14105	4.41082	down	chr13	+	78109808	78219398
ENST00000447883	RP11-277L2.3	-2.90976	-1.5409	2.90976	down	Ensembl	561	chr1	-	149576590	149577296	upstream	NM_000566	FCGR1A	high affinity immunoglobulin gamma Fc receptor I	15.9561	3.99603	15.9561	up	chr1	+	149754249	149764074
ENST00000447883	RP11-277L2.3	-2.90976	-1.5409	2.90976	down	Ensembl	561	chr1	-	149576590	149577296	upstream	NM_001005464	HIST2H3A	histone H3.2	6.67973	2.73979	6.67973	up	chr1	+	149824180	149824687
ENST00000447883	RP11-277L2.3	-2.90976	-1.5409	2.90976	down	Ensembl	561	chr1	-	149576590	149577296	upstream	NM_003517	HIST2H2AC	histone H2A type 2-C	4.89985	2.29274	4.89985	up	chr1	+	149858524	149858961
ENST00000446593	AC093642.6	-2.71029	-1.43845	2.71029	down	Ensembl	561	chr2	-	242989845	243026289	downstream	NM_022134	GAL3ST2	galactose-3-O-sulfotransferase 2	-2.13033	-1.09108	2.13033	down	chr2	+	242716239	242743702
ENST00000446593	AC093642.6	-2.71029	-1.43845	2.71029	down	Ensembl	561	chr2	-	242989845	243026289	downstream	NM_001167600	NEU4	sialidase-4 isoform 3	-3.4693	-1.79465	3.4693	down	chr2	+	242750159	242758739
ENST00000435542	RP11-328D5.1	-2.48027	-1.31049	2.48027	down	Ensembl	565	chr1	-	208047139	208052418	downstream	NM_175710	CR1L	complement component receptor 1-like protein	-3.68568	-1.88193	3.68568	down	chr1	+	207818457	207897036
ENST00000444862	AP005273.1	-2.93067	-1.55123	2.93067	down	Ensembl	522	chr11	+	64268324	64272858	upstream	NM_031471	FERMT3	fermitin family homolog 3 short form	-3.43628	-1.78085	3.43628	down	chr11	+	63974151	63991363
ENST00000444862	AP005273.1	-2.93067	-1.55123	2.93067	down	Ensembl	522	chr11	+	64268324	64272858	upstream	NM_032251	CCDC88B	coiled-coil domain-containing protein 88B	-11.7564	-3.55538	11.7564	down	chr11	+	64107689	64125006
ENST00000435542	RP11-328D5.1	-2.48027	-1.31049	2.48027	down	Ensembl	565	chr1	-	208047139	208052418	downstream	NM_000573	CR1	complement receptor type 1 isoform F precursor	-2.55061	-1.35084	2.55061	down	chr1	+	207669472	207815110
ENST00000441085	RP11-98G7.1	2.68045	1.42247	2.68045	up	Ensembl	523	chr1	-	156416203	156426258	downstream	NM_199173	BGLAP	osteocalcin preproprotein	2.79745	1.48411	2.79745	up	chr1	+	156211950	156213123
ENST00000441085	RP11-98G7.1	2.68045	1.42247	2.68045	up	Ensembl	523	chr1	-	156416203	156426258	upstream	NM_021948	BCAN	brevican core protein isoform 1	-2.78666	-1.47853	2.78666	down	chr1	+	156611739	156629320
ENST00000427247	RP11-262I2.2	-2.84122	-1.50651	2.84122	down	Ensembl	524	chr10	-	71754381	71767592	downstream	NM_080805	COL13A1	collagen alpha-1(XIII) chain isoform 19	2.49475	1.31889	2.49475	up	chr10	+	71561643	71718904
ENST00000427247	RP11-262I2.2	-2.84122	-1.50651	2.84122	down	Ensembl	524	chr10	-	71754381	71767592	upstream	NM_018649	H2AFY2	core histone macro-H2A.2	4.79888	2.2627	4.79888	up	chr10	+	71812356	71872040
ENST00000454185	RP11-568A7.3	-24.696	-4.62621	24.696	down	Ensembl	579	chr6	-	167650995	167653968	downstream	NM_031409	CCR6	C-C chemokine receptor type 6	-9.41627	-3.23515	9.41627	down	chr6	+	167536240	167552629
ENST00000437830	XX-CR54.1	-2.59395	-1.37515	2.59395	down	Ensembl	580	chr1	+	248855491	248862411	upstream	NM_001004697	OR2T5	olfactory receptor 2T5	-2.5409	-1.34534	2.5409	down	chr1	+	248651889	248652837
ENST00000453787	RP11-151D14.1	-2.25059	-1.1703	2.25059	down	Ensembl	583	chr9	-	75486643	75489025	upstream	NM_000700	ANXA1	annexin A1	-5.47407	-2.45261	5.47407	down	chr9	+	75766780	75785307
ENST00000433724	AC116609.1	-2.3488	-1.23192	2.3488	down	Ensembl	493	chr2	-	724965	731195	upstream	NM_018968	SNTG2	gamma-2-syntrophin	-2.53477	-1.34185	2.53477	down	chr2	+	946553	1371384
ENST00000438829	RP11-413P11.1	-4.21828	-2.07666	4.21828	down	Ensembl	495	chr1	-	99937917	99999571	downstream	NM_014839	LPPR4	lipid phosphate phosphatase-related protein type	-2.30676	-1.20587	2.30676	down	chr1	+	99729847	99775138
uc001hpx.2	BC032899	3.37364	1.7543	3.37364	up	UCSC_knowngene	502	chr1	+	226271655	226277990	upstream	NM_001130440	SRP9	signal recognition particle 9 kDa protein	3.48664	1.80184	3.48664	up	chr1	+	225965514	225978168
uc001hpx.2	BC032899	3.37364	1.7543	3.37364	up	UCSC_knowngene	502	chr1	+	226271655	226277990	downstream	NM_031944	MIXL1	homeobox protein MIXL1	-2.32168	-1.21517	2.32168	down	chr1	+	226411382	226413513
ENST00000448282	RP1-102H19.6	2.9047	1.53839	2.9047	up	Ensembl	542	chr6	+	88081310	88102519	upstream	NM_000735	CGA	glycoprotein hormones alpha chain precursor	2.86545	1.51876	2.86545	up	chr6	-	87795221	87804824
ENST00000448282	RP1-102H19.6	2.9047	1.53839	2.9047	up	Ensembl	542	chr6	+	88081310	88102519	upstream	NM_198568	GJB7	gap junction beta-7 protein	-35.5968	-5.15367	35.5968	down	chr6	-	87992696	88038996
ENST00000450784	RP11-452F19.3	2.00558	1.00402	2.00558	up	Ensembl	543	chr1	+	222988363	223010726	downstream	NM_003268	TLR5	toll-like receptor 5 precursor	32.7786	5.03468	32.7786	up	chr1	-	223282747	223316624
ENST00000414795	AC017076.5	4.97275	2.31404	4.97275	up	Ensembl	506	chr2	-	6969010	6980595	upstream	NM_014746	RNF144A	probable E3 ubiquitin-protein ligase RNF144A	-2.91652	-1.54425	2.91652	down	chr2	+	7057522	7184309
ENST00000444464	AC084809.3	-5.03135	-2.33095	5.03135	down	Ensembl	512	chr17	+	31232679	31233602	downstream	NM_173847	SPACA3	sperm acrosome membrane-associated protein 3	-3.65133	-1.86842	3.65133	down	chr17	+	31318881	31324892
ENST00000423568	RP11-556O15.1	-26.9594	-4.75272	26.9594	down	Ensembl	517	chr6	+	6993423	6995787	downstream	NM_001168344	RREB1	ras-responsive element-binding protein 1 isoform	-7.57117	-2.92052	7.57117	down	chr6	+	7107829	7252213
ENST00000437646	AC004448.2	-6.74769	-2.75439	6.74769	down	Ensembl	520	chr17	+	19322347	19327670	upstream	NM_007148	RNF112	RING finger protein 112	-5.74899	-2.52331	5.74899	down	chr17	+	19314490	19320589
ENST00000437646	AC004448.2	-6.74769	-2.75439	6.74769	down	Ensembl	520	chr17	+	19322347	19327670	downstream	NM_001031806	ALDH3A2	fatty aldehyde dehydrogenase isoform 1	-2.00856	-1.00616	2.00856	down	chr17	+	19552063	19580904
ENST00000437646	AC004448.2	-6.74769	-2.75439	6.74769	down	Ensembl	520	chr17	+	19322347	19327670	downstream	NM_000382	ALDH3A2	fatty aldehyde dehydrogenase isoform 2	-2.72093	-1.4441	2.72093	down	chr17	+	19552063	19580908
ENST00000424705	RP3-461P17.10	-3.05311	-1.61028	3.05311	down	Ensembl	514	chr20	+	44076041	44076982	upstream	NM_014276	RBPJL	recombining binding protein suppressor of	2.43824	1.28584	2.43824	up	chr20	+	43935490	43946464
ENST00000424705	RP3-461P17.10	-3.05311	-1.61028	3.05311	down	Ensembl	514	chr20	+	44076041	44076982	downstream	NM_006103	WFDC2	WAP four-disulfide core domain protein 2	-18.0369	-4.17288	18.0369	down	chr20	+	44098393	44110172
ENST00000424705	RP3-461P17.10	-3.05311	-1.61028	3.05311	down	Ensembl	514	chr20	+	44076041	44076982	downstream	NM_080827	WFDC6	WAP four-disulfide core domain protein 6	-18.9732	-4.24589	18.9732	down	chr20	-	44162835	44168134
ENST00000412060	Z83851.1	-2.31326	-1.20993	2.31326	down	Ensembl	475	chr22	-	42760407	42765214	downstream	NM_033318	C22orf32	hypothetical protein LOC91689 precursor	-2.5148	-1.33044	2.5148	down	chr22	+	42475698	42480288
ENST00000412060	Z83851.1	-2.31326	-1.20993	2.31326	down	Ensembl	475	chr22	-	42760407	42765214	upstream	NM_014509	SERHL2	serine hydrolase-like protein 2	-2.82624	-1.49889	2.82624	down	chr22	+	42949924	42970388
ENST00000444862	AP005273.1	-2.93067	-1.55123	2.93067	down	Ensembl	522	chr11	+	64268324	64272858	upstream	NM_003377	VEGFB	vascular endothelial growth factor B precursor	-2.08113	-1.05737	2.08113	down	chr11	+	64002265	64006259
ENST00000444862	AP005273.1	-2.93067	-1.55123	2.93067	down	Ensembl	522	chr11	+	64268324	64272858	upstream	NM_057092	FKBP2	peptidyl-prolyl cis-trans isomerase FKBP2	-4.81517	-2.26759	4.81517	down	chr11	+	64009587	64011607
ENST00000366224	RP11-571E6.3	2.12272	1.08591	2.12272	up	Ensembl	477	chrX	+	47157250	47158120	upstream	NM_033018	CDK16	cyclin-dependent kinase 16 isoform 2	-5.79524	-2.53487	5.79524	down	chrX	+	47077527	47089394
ENST00000444862	AP005273.1	-2.93067	-1.55123	2.93067	down	Ensembl	522	chr11	+	64268324	64272858	upstream	NM_001170880	GPR137	integral membrane protein GPR137 isoform 2	2.18383	1.12686	2.18383	up	chr11	+	64053581	64056972
ENST00000444862	AP005273.1	-2.93067	-1.55123	2.93067	down	Ensembl	522	chr11	+	64268324	64272858	upstream	NM_001039496	C11orf20	hypothetical protein LOC25858	-5.50038	-2.45953	5.50038	down	chr11	+	64067862	64072239
ENST00000444862	AP005273.1	-2.93067	-1.55123	2.93067	down	Ensembl	522	chr11	+	64268324	64272858	upstream	NM_001006944	RPS6KA4	ribosomal protein S6 kinase alpha-4 isoform b	2.49356	1.3182	2.49356	up	chr11	+	64126624	64139687
ENST00000442712	RP11-439E19.7	-2.48938	-1.31579	2.48938	down	Ensembl	522	chr1	+	246853348	246855123	downstream	NM_016002	SCCPDH	probable saccharopine dehydrogenase	2.14973	1.10415	2.14973	up	chr1	+	246887377	246931440
ENST00000441085	RP11-98G7.1	2.68045	1.42247	2.68045	up	Ensembl	523	chr1	-	156416203	156426258	downstream	NM_001008800	CCT3	T-complex protein 1 subunit gamma isoform c	4.89603	2.29161	4.89603	up	chr1	-	156278751	156308206
ENST00000441085	RP11-98G7.1	2.68045	1.42247	2.68045	up	Ensembl	523	chr1	-	156416203	156426258	upstream	NM_024540	MRPL24	39S ribosomal protein L24, mitochondrial	2.00055	1.0004	2.00055	up	chr1	-	156707093	156710923
ENST00000427247	RP11-262I2.2	-2.84122	-1.50651	2.84122	down	Ensembl	524	chr10	-	71754381	71767592	upstream	NM_021129	PPA1	inorganic pyrophosphatase	2.11345	1.0796	2.11345	up	chr10	-	71962585	71993190
ENST00000412797	RP11-70P17.1	-9.03379	-3.17533	9.03379	down	Ensembl	483	chr1	+	25907968	25916847	upstream	NM_015627	LDLRAP1	low density lipoprotein receptor adapter protein	-6.22508	-2.63809	6.22508	down	chr1	+	25870075	25895377
ENST00000446145	RP11-239E10.3	3.59247	1.84498	3.59247	up	Ensembl	487	chr1	+	223354485	223361496	downstream	NM_001037175	SUSD4	sushi domain-containing protein 4 isoform b	3.94451	1.97985	3.94451	up	chr1	-	223408251	223537544
ENST00000458170	RP11-69A21.2	2.68062	1.42256	2.68062	up	Ensembl	451	chrX	-	72027258	72028044	upstream	NM_001012977	PABPC1L2A	polyadenylate-binding protein 1-like 2	-6.43851	-2.68673	6.43851	down	chrX	-	72297176	72299351
ENST00000412797	RP11-70P17.1	-9.03379	-3.17533	9.03379	down	Ensembl	483	chr1	+	25907968	25916847	downstream	NM_024037	C1orf135	aurora A-binding protein	2.26394	1.17884	2.26394	up	chr1	-	26160496	26185848
ENST00000420876	RP11-511I2.2	-4.22292	-2.07824	4.22292	down	Ensembl	483	chr1	-	47846599	47874149	downstream	NM_001048166	STIL	SCL-interrupting locus protein isoform 1	8.42938	3.07543	8.42938	up	chr1	-	47715810	47779819
ENST00000418953	RP13-30A9.2	-2.81413	-1.49269	2.81413	down	Ensembl	461	chr20	+	61265123	61267214	downstream	NM_001853	COL9A3	collagen alpha-3(IX) chain precursor	-4.35149	-2.12151	4.35149	down	chr20	+	61448413	61472511
ENST00000417311	RP11-84P7.2	2.32897	1.21969	2.32897	up	Ensembl	504	chr9	+	36307038	36315276	upstream	NM_005893	CCIN	calicin	8.61001	3.10602	8.61001	up	chr9	+	36169388	36171331
ENST00000455568	NCRNA00087	-2.31843	-1.21315	2.31843	down	Ensembl	471	chrX	-	134229142	134232388	downstream	NM_001170780	FAM122C	hypothetical protein LOC159091 isoform 3	4.08187	2.02923	4.08187	up	chrX	+	133930442	133957015
ENST00000457239	RP11-71G12.1	-12.8834	-3.68744	12.8834	down	Ensembl	471	chr1	+	157155177	157157195	upstream	NM_001080471	PEAR1	platelet endothelial aggregation receptor 1	-2.10519	-1.07395	2.10519	down	chr1	+	156863522	156886226
ENST00000450255	RP1-140K8.1	-24.9946	-4.64355	24.9946	down	Ensembl	441	chr6	+	3893359	3894524	downstream	NM_003913	PRPF4B	serine/threonine-protein kinase PRP4 homolog	2.61697	1.3879	2.61697	up	chr6	+	4021568	4065217
ENST00000456537	AC004448.5	-2.72794	-1.44781	2.72794	down	Ensembl	441	chr17	-	19342455	19364048	upstream	NM_001031806	ALDH3A2	fatty aldehyde dehydrogenase isoform 1	-2.00856	-1.00616	2.00856	down	chr17	+	19552063	19580904
ENST00000366224	RP11-571E6.3	2.12272	1.08591	2.12272	up	Ensembl	477	chrX	+	47157250	47158120	upstream	NM_153280	UBA1	ubiquitin-like modifier-activating enzyme 1	-2.23788	-1.16214	2.23788	down	chrX	+	47050198	47074527
ENST00000366224	RP11-571E6.3	2.12272	1.08591	2.12272	up	Ensembl	477	chrX	+	47157250	47158120	downstream	NM_003446	ZNF157	zinc finger protein 157	2.80138	1.48614	2.80138	up	chrX	+	47229998	47273098
ENST00000414875	RP1-153P14.5	-4.94842	-2.30697	4.94842	down	Ensembl	442	chr6	+	37517779	37518636	upstream	NM_183078	RNF8	E3 ubiquitin-protein ligase RNF8 isoform 2	3.64019	1.86401	3.64019	up	chr6	+	37321747	37362514
ENST00000447956	RP11-128M1.1	-126.847	-6.98695	126.847	down	Ensembl	415	chr20	+	2187862	2193797	upstream	NM_001040023	SIRPA	tyrosine-protein phosphatase non-receptor type	-3.07469	-1.62044	3.07469	down	chr20	+	1875825	1920540
ENST00000359838	RP3-337D23.3	-2.2976	-1.20013	2.2976	down	Ensembl	453	chr6	+	147480060	147502128	downstream	NM_139244	STXBP5	syntaxin-binding protein 5 isoform a	2.37511	1.24799	2.37511	up	chr6	+	147525507	147708707
ENST00000419576	RP11-561O23.7	2.31243	1.20941	2.31243	up	Ensembl	416	chr9	+	70922308	70923361	downstream	NM_021965	PGM5	phosphoglucomutase-like protein 5	-5.29879	-2.40566	5.29879	down	chr9	+	70971814	71145977
ENST00000414923	RP11-153F1.2	-2.61126	-1.38474	2.61126	down	Ensembl	418	chr1	+	103957500	103968087	downstream	NM_001008219	AMY1C	alpha-amylase 1 precursor	-67.3758	-6.07416	67.3758	down	chr1	-	104230040	104238911
ENST00000424162	RP1-60O19.2	-33.2338	-5.05458	33.2338	down	Ensembl	419	chr6	+	107143409	107147869	downstream	NM_001142470	C6orf203	hypothetical protein LOC51250 isoform b	2.51367	1.32979	2.51367	up	chr6	+	107349406	107372547
ENST00000418953	RP13-30A9.2	-2.81413	-1.49269	2.81413	down	Ensembl	461	chr20	+	61265123	61267214	downstream	NM_007346	OGFR	opioid growth factor receptor	2.88811	1.53012	2.88811	up	chr20	+	61436176	61445352
ENST00000467630	AC000123.3	-2.37622	-1.24867	2.37622	down	Ensembl	461	chr7	-	126989886	126990347	downstream	NM_000845	GRM8	metabotropic glutamate receptor 8 isoform a	2.26565	1.17992	2.26565	up	chr7	-	126078651	126883569
ENST00000449071	RP11-128B16.3	-2.28577	-1.19268	2.28577	down	Ensembl	422	chr10	-	26866604	26868236	downstream	NM_019043	APBB1IP	amyloid beta A4 precursor protein-binding family	-7.32613	-2.87305	7.32613	down	chr10	+	26727265	26856732
ENST00000419428	RP11-356N1.2	2.33881	1.22577	2.33881	up	Ensembl	432	chr1	+	108614103	108617141	downstream	NM_001143989	NBPF4	neuroblastoma breakpoint family, member 4	-2.98794	-1.57915	2.98794	down	chr1	-	108765962	108786703
ENST00000418403	RP11-462G2.1	-4.09546	-2.03403	4.09546	down	Ensembl	397	chr6	+	71104589	71109120	downstream	NM_020819	FAM135A	hypothetical protein LOC57579 isoform b	3.32993	1.73549	3.32993	up	chr6	+	71123106	71270877
ENST00000424162	RP1-60O19.2	-33.2338	-5.05458	33.2338	down	Ensembl	419	chr6	+	107143409	107147869	upstream	NM_001624	AIM1	absent in melanoma 1 protein	3.01898	1.59406	3.01898	up	chr6	+	106959729	107018334
ENST00000444744	RP11-428O18.4	-2.485	-1.31324	2.485	down	Ensembl	420	chr13	-	27810418	27810948	upstream	NM_002097	GTF3A	transcription factor IIIA	-2.5213	-1.33417	2.5213	down	chr13	+	27998680	28009846
ENST00000415726	RP11-336K24.5	-7.80017	-2.9635	7.80017	down	Ensembl	401	chr1	+	155961180	155971578	upstream	NM_004723	ARHGEF2	rho guanine nucleotide exchange factor 2 isoform	3.36517	1.75068	3.36517	up	chr1	-	155916629	155947966
ENST00000443719	RP11-101P17.10	-3.00441	-1.58708	3.00441	down	Ensembl	405	chr13	+	21808706	21809343	upstream	NM_024026	MRP63	ribosomal protein 63, mitochondrial	-2.3969	-1.26117	2.3969	down	chr13	+	21750371	21753220
ENST00000419428	RP11-356N1.2	2.33881	1.22577	2.33881	up	Ensembl	432	chr1	+	108614103	108617141	upstream	NM_006113	VAV3	guanine nucleotide exchange factor VAV3 isoform	-2.54327	-1.34668	2.54327	down	chr1	-	108113781	108507545
ENST00000415138	AC097495.2	-2.33976	-1.22636	2.33976	down	Ensembl	436	chr2	+	69059175	69064840	upstream	NM_138964	PROKR1	prokineticin receptor 1	-4.29614	-2.10304	4.29614	down	chr2	+	68872953	68882708
ENST00000415138	AC097495.2	-2.33976	-1.22636	2.33976	down	Ensembl	436	chr2	+	69059175	69064840	downstream	NM_019617	GKN1	gastrokine-1 precursor	-4.04616	-2.01655	4.04616	down	chr2	+	69201704	69208112
ENST00000450255	RP1-140K8.1	-24.9946	-4.64355	24.9946	down	Ensembl	441	chr6	+	3893359	3894524	upstream	NM_183373	C6orf145	PX domain-containing protein C6orf145	2.24223	1.16494	2.24223	up	chr6	-	3722835	3752246
ENST00000416242	RP11-143M1.4	-4.56851	-2.19172	4.56851	down	Ensembl	413	chr9	-	112715	113754	upstream	NM_203447	DOCK8	dedicator of cytokinesis protein 8 isoform 1	-4.38606	-2.13293	4.38606	down	chr9	+	214864	465259
ENST00000456537	AC004448.5	-2.72794	-1.44781	2.72794	down	Ensembl	441	chr17	-	19342455	19364048	upstream	NM_000382	ALDH3A2	fatty aldehyde dehydrogenase isoform 2	-2.72093	-1.4441	2.72093	down	chr17	+	19552063	19580908
ENST00000440492	RP11-288L9.1	9.78162	3.29007	9.78162	up	Ensembl	441	chr1	-	27986838	27989233	downstream	NM_004672	MAP3K6	mitogen-activated protein kinase kinase kinase	-2.0635	-1.04509	2.0635	down	chr1	-	27681669	27693337
ENST00000440492	RP11-288L9.1	9.78162	3.29007	9.78162	up	Ensembl	441	chr1	-	27986838	27989233	upstream	NM_002038	IFI6	interferon alpha-inducible protein 6 isoform a	9.54851	3.25528	9.54851	up	chr1	-	27992571	27998724
ENST00000457890	AC063976.3	3.1808	1.66939	3.1808	up	Ensembl	381	chr5	-	131514926	131516821	upstream	NM_003059	SLC22A4	solute carrier family 22 member 4	-14.8908	-3.89635	14.8908	down	chr5	+	131630144	131679899
ENST00000415726	RP11-336K24.5	-7.80017	-2.9635	7.80017	down	Ensembl	401	chr1	+	155961180	155971578	downstream	NM_199173	BGLAP	osteocalcin preproprotein	2.79745	1.48411	2.79745	up	chr1	+	156211950	156213123
ENST00000443719	RP11-101P17.10	-3.00441	-1.58708	3.00441	down	Ensembl	405	chr13	+	21808706	21809343	upstream	NM_005870	SAP18	histone deacetylase complex subunit SAP18	-2.40512	-1.26611	2.40512	down	chr13	+	21714652	21723224
ENST00000419064	RP11-13P5.2	3.3958	1.76375	3.3958	up	Ensembl	385	chr6	+	159586940	159588385	downstream	NM_032532	FNDC1	fibronectin type III domain-containing protein	13.8008	3.78668	13.8008	up	chr6	+	159590428	159693140
ENST00000451438	RP11-168L22.2	-2.42531	-1.27817	2.42531	down	Ensembl	391	chr10	+	43819112	43823380	upstream	NM_018590	CSGALNACT2	chondroitin sulfate	2.4436	1.28901	2.4436	up	chr10	+	43633933	43680749
ENST00000414923	RP11-153F1.2	-2.61126	-1.38474	2.61126	down	Ensembl	418	chr1	+	103957500	103968087	downstream	NM_020978	AMY2B	alpha-amylase 2B precursor	-67.7862	-6.08292	67.7862	down	chr1	+	104097321	104122149
ENST00000414923	RP11-153F1.2	-2.61126	-1.38474	2.61126	down	Ensembl	418	chr1	+	103957500	103968087	downstream	NM_000699	AMY2A	pancreatic alpha-amylase precursor	-77.9428	-6.28434	77.9428	down	chr1	+	104159998	104168400
ENST00000448198	XXbac-BPG254F23.7	-5.49268	-2.45751	5.49268	down	Ensembl	381	chr6	+	32685781	32686604	downstream	NM_020056	HLA-DQA2	HLA class II histocompatibility antigen, DQ	-17.3191	-4.11429	17.3191	down	chr6	+	32709162	32714664
ENST00000457890	AC063976.3	3.1808	1.66939	3.1808	up	Ensembl	381	chr5	-	131514926	131516821	upstream	NM_001013717	C5orf56	hypothetical protein LOC441108 isoform 1	8.95153	3.16213	8.95153	up	chr5	+	131746672	131798059
ENST00000427911	AP000281.2	-2.32064	-1.21452	2.32064	down	Ensembl	384	chr21	-	34216676	34222244	upstream	NM_138983	OLIG1	oligodendrocyte transcription factor 1	-4.3446	-2.11922	4.3446	down	chr21	+	34442449	34444728
ENST00000435429	RP3-470L22.1	-2.22059	-1.15095	2.22059	down	Ensembl	388	chr6	-	6758510	6759524	downstream	NM_004271	LY86	lymphocyte antigen 86 precursor	-3.28085	-1.71407	3.28085	down	chr6	+	6588933	6655216
ENST00000428426	AC002511.3	-2.08235	-1.05821	2.08235	down	Ensembl	376	chr19	-	35923858	35924720	downstream	NM_022006	FXYD7	FXYD domain-containing ion transport regulator	-13.3876	-3.74283	13.3876	down	chr19	+	35634153	35645205
ENST00000428426	AC002511.3	-2.08235	-1.05821	2.08235	down	Ensembl	376	chr19	-	35923858	35924720	downstream	NM_205835	LSR	lipolysis-stimulated lipoprotein receptor	2.1386	1.09667	2.1386	up	chr19	+	35739558	35758867
ENST00000451438	RP11-168L22.2	-2.42531	-1.27817	2.42531	down	Ensembl	391	chr10	+	43819112	43823380	upstream	NM_145313	RASGEF1A	ras-GEF domain-containing family member 1A	-2.53141	-1.33994	2.53141	down	chr10	-	43689983	43762367
ENST00000451438	RP11-168L22.2	-2.42531	-1.27817	2.42531	down	Ensembl	391	chr10	+	43819112	43823380	downstream	NM_001098206	HNRNPF	heterogeneous nuclear ribonucleoprotein F	2.11925	1.08355	2.11925	up	chr10	-	43881064	43903299
ENST00000429980	RP11-143M1.2	-3.12769	-1.6451	3.12769	down	Ensembl	394	chr9	+	72700	88826	downstream	NM_203447	DOCK8	dedicator of cytokinesis protein 8 isoform 1	-4.38606	-2.13293	4.38606	down	chr9	+	214864	465259
ENST00000428426	AC002511.3	-2.08235	-1.05821	2.08235	down	Ensembl	376	chr19	-	35923858	35924720	upstream	NM_014209	ETV2	ETS translocation variant 2	-3.24113	-1.6965	3.24113	down	chr19	+	36132646	36135773
ENST00000428426	AC002511.3	-2.08235	-1.05821	2.08235	down	Ensembl	376	chr19	-	35923858	35924720	upstream	NM_014383	ZBTB32	zinc finger and BTB domain-containing protein	-3.31111	-1.72732	3.31111	down	chr19	+	36203829	36207940
ENST00000418403	RP11-462G2.1	-4.09546	-2.03403	4.09546	down	Ensembl	397	chr6	+	71104589	71109120	upstream	NM_001858	COL19A1	collagen alpha-1(XIX) chain precursor	14.6315	3.87101	14.6315	up	chr6	+	70576447	70922157
ENST00000435493	C21orf130	-4.91775	-2.298	4.91775	down	Ensembl	349	chr21	-	42515068	42519350	upstream	NM_058186	FAM3B	cytokine-like protein 2-21 isoform a	-2.66943	-1.41653	2.66943	down	chr21	+	42688660	42729654
ENST00000456795	RP3-331H24.4	3.81553	1.93189	3.81553	up	Ensembl	352	chr6	+	72038644	72039509	upstream	NM_024576	OGFRL1	opioid growth factor receptor-like protein 1	3.53025	1.81977	3.53025	up	chr6	+	71998476	72011973
ENST00000455247	RP5-1109J22.3	-2.57406	-1.36405	2.57406	down	Ensembl	354	chr1	+	46921494	46948147	upstream	NM_001441	FAAH	fatty-acid amide hydrolase 1	4.72796	2.24122	4.72796	up	chr1	+	46859938	46879520
HIT000395572		-3.29066	-1.71838	3.29066	down	H-invDB	354	chr1	-	200443206	200443559	upstream	NM_203459	CAMSAP1L1	calmodulin-regulated spectrin-associated protein	5.72422	2.51708	5.72422	up	chr1	+	200708685	200829831
ENST00000455247	RP5-1109J22.3	-2.57406	-1.36405	2.57406	down	Ensembl	354	chr1	+	46921494	46948147	upstream	NM_003579	RAD54L	DNA repair and recombination protein RAD54-like	7.70689	2.94615	7.70689	up	chr1	+	46713366	46744145
ENST00000416924	RP11-484I6.6	-2.65158	-1.40685	2.65158	down	Ensembl	361	chr13	+	103532285	103533517	upstream	NM_017693	BIVM	basic immunoglobulin-like variable	5.05015	2.33633	5.05015	up	chr13	+	103451398	103493888
ENST00000272546	RP11-143M1.7	-3.28394	-1.71543	3.28394	down	Ensembl	369	chr9	-	52452	73344	upstream	NM_203447	DOCK8	dedicator of cytokinesis protein 8 isoform 1	-4.38606	-2.13293	4.38606	down	chr9	+	214864	465259
ENST00000422894	RP5-894D12.3	-4.81364	-2.26713	4.81364	down	Ensembl	318	chr6	+	170584461	170588557	downstream	NM_001172085	TBP	TATA-box-binding protein isoform 2	3.14939	1.65507	3.14939	up	chr6	+	170863420	170881958
ENST00000441287	AC011193.1	2.78177	1.476	2.78177	up	Ensembl	323	chr17	+	32806352	32806976	upstream	NM_002986	CCL11	eotaxin precursor	4.60623	2.20359	4.60623	up	chr17	+	32612686	32615199
ENST00000441287	AC011193.1	2.78177	1.476	2.78177	up	Ensembl	323	chr17	+	32806352	32806976	upstream	NM_005623	CCL8	C-C motif chemokine 8 precursor	-2.11368	-1.07976	2.11368	down	chr17	+	32646065	32648421
ENST00000441287	AC011193.1	2.78177	1.476	2.78177	up	Ensembl	323	chr17	+	32806352	32806976	downstream	NM_207313	TMEM132E	transmembrane protein 132E precursor	-10.9301	-3.45023	10.9301	down	chr17	+	32907767	32966337
ENST00000455153	XXyac-YR29IB3.1	-5.62548	-2.49198	5.62548	down	Ensembl	323	chrX	-	139763270	139769870	downstream	NM_005634	SOX3	transcription factor SOX-3	-2.35233	-1.23409	2.35233	down	chrX	-	139585151	139587225
ENST00000425322	AC006041.1	-4.36202	-2.125	4.36202	down	Ensembl	328	chr7	-	15880921	15881985	downstream	NM_001004320	AGMO	alkylglycerol monooxygenase	18.2434	4.1893	18.2434	up	chr7	-	15239942	15601640
ENST00000446887	RP1-111C20.3	-5.17949	-2.37281	5.17949	down	Ensembl	331	chr6	-	159485759	159486305	upstream	NM_032532	FNDC1	fibronectin type III domain-containing protein	13.8008	3.78668	13.8008	up	chr6	+	159590428	159693140
ENST00000440750	RP11-534L6.2	-4.24913	-2.08717	4.24913	down	Ensembl	335	chr10	-	49872243	49880469	downstream	NM_002750	MAPK8	mitogen-activated protein kinase 8 isoform JNK1	-5.47739	-2.45349	5.47739	down	chr10	+	49609686	49643183
ENST00000446290	RP11-274B18.2	5.90356	2.56159	5.90356	up	Ensembl	338	chr9	-	71158456	71161505	downstream	NM_021965	PGM5	phosphoglucomutase-like protein 5	-5.29879	-2.40566	5.29879	down	chr9	+	70971814	71145977
ENST00000432331	RP11-478K15.1	-2.20107	-1.13821	2.20107	down	Ensembl	340	chr13	-	44680513	44711372	upstream	NM_001010897	SERP2	stress-associated endoplasmic reticulum protein	-2.86536	-1.51871	2.86536	down	chr13	+	44947977	44971850
ENST00000454647	C18orf20	-2.18707	-1.129	2.18707	down	Ensembl	339	chr18	-	61747535	61765844	downstream	NM_002575	SERPINB2	plasminogen activator inhibitor 2 precursor	-28.9102	-4.8535	28.9102	down	chr18	+	61554938	61571124
ENST00000433770	RP11-472N13.3	3.135	1.64847	3.135	up	Ensembl	347	chr10	-	31982011	31996316	upstream	NM_018287	ARHGAP12	rho GTPase-activating protein 12	3.40096	1.76594	3.40096	up	chr10	-	32095224	32217770
ENST00000421153	RP4-811H24.8	-3.32788	-1.7346	3.32788	down	Ensembl	267	chr1	+	32817121	32819143	upstream	NM_012316	KPNA6	importin subunit alpha-7	-2.23963	-1.16326	2.23963	down	chr1	+	32573643	32642168
ENST00000421153	RP4-811H24.8	-3.32788	-1.7346	3.32788	down	Ensembl	267	chr1	+	32817121	32819143	downstream	NM_052841	TSSK3	testis-specific serine/threonine-protein kinase	-3.01522	-1.59226	3.01522	down	chr1	+	32827861	32829924
ENST00000421788	RP4-697P8.2	-3.5024	-1.80835	3.5024	down	Ensembl	268	chr20	+	10845302	10847830	upstream	NM_000214	JAG1	protein jagged-1 precursor	2.30391	1.20409	2.30391	up	chr20	-	10618331	10654694
ENST00000422410	RP11-344N17.8	-2.26376	-1.17872	2.26376	down	Ensembl	270	chrX	-	48193109	48193874	downstream	NM_021015	SSX5	protein SSX5 isoform a	-2.27431	-1.18543	2.27431	down	chrX	-	48045655	48056199
ENST00000422410	RP11-344N17.8	-2.26376	-1.17872	2.26376	down	Ensembl	270	chrX	-	48193109	48193874	upstream	NM_203475	PORCN	probable protein-cysteine N-palmitoyltransferase	-2.00518	-1.00374	2.00518	down	chrX	+	48368171	48379202
ENST00000422410	RP11-344N17.8	-2.26376	-1.17872	2.26376	down	Ensembl	270	chrX	-	48193109	48193874	upstream	NM_002536	TBC1D25	TBC1 domain family member 25	-2.0577	-1.04103	2.0577	down	chrX	+	48398074	48420997
uc004dgl.1	BC015977	-5.56906	-2.47743	5.56906	down	UCSC_knowngene	271	chrX	-	46185713	46187080	upstream	NM_001129899	ZNF673	protein ZNF673 isoform 3	2.78091	1.47556	2.78091	up	chrX	+	46306623	46334074
ENST00000444515	C1orf46	-15.1761	-3.92373	15.1761	down	Ensembl	302	chr1	+	152627952	152629280	downstream	NM_178430	LCE2D	late cornified envelope protein 2D	-4.45602	-2.15576	4.45602	down	chr1	+	152635871	152637135
ENST00000444515	C1orf46	-15.1761	-3.92373	15.1761	down	Ensembl	302	chr1	+	152627952	152629280	downstream	NM_178353	LCE1E	late cornified envelope protein 1E	2.84793	1.50991	2.84793	up	chr1	+	152758752	152760901
ENST00000444515	C1orf46	-15.1761	-3.92373	15.1761	down	Ensembl	302	chr1	+	152627952	152629280	downstream	NM_005547	IVL	involucrin	-458.406	-8.84048	458.406	down	chr1	+	152881038	152884362
ENST00000442526	RP11-517P14.2	3.78557	1.92051	3.78557	up	Ensembl	303	chr10	+	43916046	43917254	upstream	NM_145313	RASGEF1A	ras-GEF domain-containing family member 1A	-2.53141	-1.33994	2.53141	down	chr10	-	43689983	43762367
ENST00000442526	RP11-517P14.2	3.78557	1.92051	3.78557	up	Ensembl	303	chr10	+	43916046	43917254	upstream	NM_001098206	HNRNPF	heterogeneous nuclear ribonucleoprotein F	2.11925	1.08355	2.11925	up	chr10	-	43881064	43903299
ENST00000444515	C1orf46	-15.1761	-3.92373	15.1761	down	Ensembl	302	chr1	+	152627952	152629280	upstream	NM_016190	CRNN	cornulin	-4.19871	-2.06995	4.19871	down	chr1	-	152381718	152386750
ENST00000444515	C1orf46	-15.1761	-3.92373	15.1761	down	Ensembl	302	chr1	+	152627952	152629280	upstream	NM_178433	LCE3B	late cornified envelope protein 3B	-3.77219	-1.9154	3.77219	down	chr1	+	152586286	152586574
ENST00000444515	C1orf46	-15.1761	-3.92373	15.1761	down	Ensembl	302	chr1	+	152627952	152629280	downstream	NM_178429	LCE2C	late cornified envelope protein 2C	-3.86136	-1.94911	3.86136	down	chr1	+	152647770	152649049
ENST00000444515	C1orf46	-15.1761	-3.92373	15.1761	down	Ensembl	302	chr1	+	152627952	152629280	downstream	NM_014357	LCE2B	late cornified envelope protein 2B	-5.17519	-2.37161	5.17519	down	chr1	+	152658598	152659876
ENST00000444515	C1orf46	-15.1761	-3.92373	15.1761	down	Ensembl	302	chr1	+	152627952	152629280	downstream	NM_001128600	LCE6A	late cornified envelope protein 6A	-2.14223	-1.09912	2.14223	down	chr1	+	152815329	152816459
ENST00000419514	RP11-366O17.2	26.337	4.71902	26.337	up	Ensembl	192	chr13	+	43385972	43386428	upstream	NM_182508	C13orf30	hypothetical protein LOC144809	-77.1797	-6.27015	77.1797	down	chr13	+	43355685	43365685
ENST00000419514	RP11-366O17.2	26.337	4.71902	26.337	up	Ensembl	192	chr13	+	43385972	43386428	downstream	NM_001002264	EPSTI1	epithelial-stromal interaction protein 1 isoform	9.87309	3.3035	9.87309	up	chr13	-	43462121	43566377
ENST00000446733	RP11-550C4.6	-2.64916	-1.40554	2.64916	down	Ensembl	197	chr6	-	47697562	47708477	downstream	NM_012120	CD2AP	CD2-associated protein	2.3181	1.21294	2.3181	up	chr6	+	47445524	47594996
ENST00000419514	RP11-366O17.2	26.337	4.71902	26.337	up	Ensembl	192	chr13	+	43385972	43386428	downstream	NM_033255	EPSTI1	epithelial-stromal interaction protein 1 isoform	4.48198	2.16414	4.48198	up	chr13	-	43462121	43566377
ENST00000434255	RP1-32B1.4	2.29321	1.19737	2.29321	up	Ensembl	216	chr6	+	135581133	135582071	upstream	NM_001145158	HBS1L	HBS1-like protein isoform 2	2.98963	1.57997	2.98963	up	chr6	-	135281516	135376036
ENST00000434255	RP1-32B1.4	2.29321	1.19737	2.29321	up	Ensembl	216	chr6	+	135581133	135582071	upstream	NM_001161658	MYB	transcriptional activator Myb isoform 6	2.1074	1.07546	2.1074	up	chr6	+	135502452	135540311
ENST00000434255	RP1-32B1.4	2.29321	1.19737	2.29321	up	Ensembl	216	chr6	+	135581133	135582071	upstream	NM_001161659	MYB	transcriptional activator Myb isoform 7	2.78489	1.47762	2.78489	up	chr6	+	135502452	135540311
ENST00000415471	RP11-100G15.10	-2.47865	-1.30956	2.47865	down	Ensembl	211	chr9	-	94912662	94919727	upstream	NM_013417	IARS	isoleucyl-tRNA synthetase, cytoplasmic	2.48919	1.31567	2.48919	up	chr9	-	94972624	95055972
ENST00000434255	RP1-32B1.4	2.29321	1.19737	2.29321	up	Ensembl	216	chr6	+	135581133	135582071	upstream	NM_006620	HBS1L	HBS1-like protein isoform 1	2.56288	1.35777	2.56288	up	chr6	-	135281516	135376036

## Sheet: M1 vs T4
# Condition pairs: M1vs T4 # Fold Change cut-off: 2.0 This table contains the differentially expressed enhancer-like LncRNAs and their nearby coding genes (distance < 300 kb). # Column A: seqname, the sequence identifier. # Column B: GeneSymbol, the symbol of the LncRNA. # Column C: Fold change - LncRNAs, the ratio of normalized intensities between two samples, positive value indicates up-regulat…
seqname	GeneSymbol	Fold change - LncRNAs	Log Fold change - LncRNAs	Absolute Fold change - LncRNAs	Regulation - LncRNAs	source	RNAlength	Chrom	Strand	txStart	txEnd	GenomeRelationship	NearbyGene	NearbyGeneSymbol	NearbyProteinName	Fold change - mRNAs	Log Fold change - mRNAs	Absolute Fold change - mRNAs	Regulation - mRNAs	NearbyGeneChrom	NearbyGeneStrand	NearbyGenetxStart	NearbyGenetxEnd
uc001kgv.1	BC035398	-2.58511	-1.37023	2.58511	down	UCSC_knowngene	4272	chr10	+	91589266	91600618	upstream	NM_213606	SLC16A12	monocarboxylate transporter 12	-2.64442	-1.40295	2.64442	down	chr10	-	91190050	91295313
uc001kgv.1	BC035398	-2.58511	-1.37023	2.58511	down	UCSC_knowngene	4272	chr10	+	91589266	91600618	upstream	NM_016195	KIF20B	kinesin-like protein KIF20B	8.85596	3.14665	8.85596	up	chr10	+	91461366	91534700
ENST00000429998	RP11-513I15.6	-2.03204	-1.02293	2.03204	down	Ensembl	4785	chr6	+	34247481	34252266	upstream	NM_145902	HMGA1	high mobility group protein HMG-I/HMG-Y isoform	3.94472	1.97992	3.94472	up	chr6	+	34204649	34214008
ENST00000429998	RP11-513I15.6	-2.03204	-1.02293	2.03204	down	Ensembl	4785	chr6	+	34247481	34252266	downstream	NM_012391	SPDEF	SAM pointed domain-containing Ets transcription	-4.15562	-2.05506	4.15562	down	chr6	-	34505579	34524091
uc002khh.2	LOC388312	2.49442	1.3187	2.49442	up	UCSC_knowngene	4812	chr1	-	661139	679736	upstream	NM_198576	AGRN	agrin precursor	2.64083	1.40099	2.64083	up	chr1	+	955502	991492
NR_026790	HCG11	2.03793	1.02711	2.03793	up	RefSeq_NR	5688	chr6	+	26521933	26527610	upstream	NM_003532	HIST1H3E	histone H3.1	4.51061	2.17332	4.51061	up	chr6	+	26225382	26225844
NR_026790	HCG11	2.03793	1.02711	2.03793	up	RefSeq_NR	5688	chr6	+	26521933	26527610	upstream	NM_003524	HIST1H2BH	histone H2B type 1-H	8.35432	3.06252	8.35432	up	chr6	+	26251878	26252303
ENST00000434868	RP1-90L6.2	-14.7686	-3.88446	14.7686	down	Ensembl	6043	chr22	+	27254596	27261749	upstream	NM_001886	CRYBA4	beta-crystallin A4	-4.84189	-2.27557	4.84189	down	chr22	+	27017927	27026636
ENST00000450248	TUG1	3.46278	1.79193	3.46278	up	Ensembl	6477	chr22	+	31365642	31374831	downstream	NM_134269	SMTN	smoothelin isoform b	4.18415	2.06493	4.18415	up	chr22	+	31477304	31500609
ENST00000450248	TUG1	3.46278	1.79193	3.46278	up	Ensembl	6477	chr22	+	31365642	31374831	downstream	NM_134270	SMTN	smoothelin isoform a	3.08903	1.62715	3.08903	up	chr22	+	31477304	31500609
ENST00000449605	RP11-147O5.1	4.06024	2.02156	4.06024	up	Ensembl	7619	chrX	+	21911717	21920026	upstream	NM_014927	CNKSR2	connector enhancer of kinase suppressor of ras 2	-31.514	-4.97792	31.514	down	chrX	+	21392535	21672813
uc003ojj.2	CR624291	-2.01441	-1.01036	2.01441	down	UCSC_knowngene	2513	chr6	-	34247456	34249969	upstream	NM_012391	SPDEF	SAM pointed domain-containing Ets transcription	-4.15562	-2.05506	4.15562	down	chr6	-	34505579	34524091
AB073661		2.23157	1.15806	2.23157	up	NRED	2686	chr22	+	31371385	31374065	downstream	NM_001002837	INPP5J	phosphatidylinositol 4,5-bisphosphate	2.62366	1.39158	2.62366	up	chr22	+	31518960	31530683
ENST00000433673	AC068282.3	9.37023	3.22808	9.37023	up	Ensembl	2690	chr2	+	128146705	128158156	upstream	NM_006609	MAP3K2	mitogen-activated protein kinase kinase kinase	2.60026	1.37865	2.60026	up	chr2	-	128062138	128100770
ENST00000417443	NCRNA00086	-2.75079	-1.45985	2.75079	down	Ensembl	2913	chrX	+	134555867	134559682	downstream	NM_182540	DDX26B	protein DDX26B	-2.49589	-1.31955	2.49589	down	chrX	+	134654554	134716460
ENST00000450520	RP11-216M21.7	-3.45905	-1.79037	3.45905	down	Ensembl	3200	chr9	-	42363047	42367092	upstream	NM_001012421	ANKRD20A2	ankyrin repeat domain 20 family, member A2	6.69223	2.74249	6.69223	up	chr9	+	42368302	42411410
ENST00000447720	KB-1183D5.13	-7.36844	-2.88136	7.36844	down	Ensembl	3215	chr22	-	21655278	21679331	upstream	NM_001128635	RIMBP3B	RIMS-binding protein 3B	-3.65965	-1.8717	3.65965	down	chr22	+	21738039	21743455
NR_033370	LOC63930	-3.16825	-1.66369	3.16825	down	RefSeq_NR	3366	chr20	+	61640734	61716423	upstream	NM_002531	NTSR1	neurotensin receptor type 1	-3.48527	-1.80127	3.48527	down	chr20	+	61340188	61394123
NR_033370	LOC63930	-3.16825	-1.66369	3.16825	down	RefSeq_NR	3366	chr20	+	61640734	61716423	upstream	NM_001853	COL9A3	collagen alpha-3(IX) chain precursor	-3.37385	-1.7544	3.37385	down	chr20	+	61448413	61472511
NR_033370	LOC63930	-3.16825	-1.66369	3.16825	down	RefSeq_NR	3366	chr20	+	61640734	61716423	downstream	NM_139317	BIRC7	baculoviral IAP repeat-containing protein 7	2.0259	1.01856	2.0259	up	chr20	+	61867275	61871854
uc002qgt.1	BC131616	-4.17945	-2.06331	4.17945	down	UCSC_knowngene	2014	chr19	+	55219699	55224842	upstream	NM_006863	LILRA1	leukocyte immunoglobulin-like receptor subfamily	-2.52547	-1.33655	2.52547	down	chr19	+	55105112	55112540
uc002qgt.1	BC131616	-4.17945	-2.06331	4.17945	down	UCSC_knowngene	2014	chr19	+	55219699	55224842	downstream	NM_001080770	KIR2DL4	killer cell immunoglobulin-like receptor 2DL4	3.30795	1.72594	3.30795	up	chr19	+	55315066	55325972
ENST00000457698	RP11-66A2.2	2.85772	1.51486	2.85772	up	Ensembl	2042	chr1	-	232862999	232878461	upstream	NM_032324	NTPCR	cancer-related nucleoside-triphosphatase	3.8578	1.94778	3.8578	up	chr1	+	233086369	233114219
ENST00000457698	RP11-66A2.2	2.85772	1.51486	2.85772	up	Ensembl	2042	chr1	-	232862999	232878461	upstream	NM_014801	PCNXL2	pecanex-like protein 2	4.76275	2.25179	4.76275	up	chr1	-	233119881	233431459
uc004aiu.1	AK095210	-2.06137	-1.0436	2.06137	down	UCSC_knowngene	2078	chr9	+	74920351	74958126	upstream	NM_004293	GDA	guanine deaminase isoform b	-6.38855	-2.67549	6.38855	down	chr9	+	74764292	74867140
uc001uos.2	AL833146	-9.29872	-3.21703	9.29872	down	UCSC_knowngene	2086	chr13	+	24043650	24061602	upstream	NM_000231	SGCG	gamma-sarcoglycan	-3.20295	-1.6794	3.20295	down	chr13	+	23755059	23899304
uc002sdy.1	AK123766	-47.2193	-5.5613	47.2193	down	UCSC_knowngene	2100	chr2	-	67350488	67442451	upstream	NM_019002	ETAA1	ewing's tumor-associated antigen 1	3.56358	1.83333	3.56358	up	chr2	+	67624441	67637533
NR_026951	C17orf44	-2.02643	-1.01894	2.02643	down	RefSeq_NR	2115	chr17	-	8123948	8127361	upstream	NM_001177802	RANGRF	ran guanine nucleotide release factor isoform C	-4.57552	-2.19394	4.57552	down	chr17	+	8191968	8193409
NR_026951	C17orf44	-2.02643	-1.01894	2.02643	down	RefSeq_NR	2115	chr17	-	8123948	8127361	upstream	NM_001146684	RNF222	RING finger protein 222	-16.2076	-4.01859	16.2076	down	chr17	-	8294022	8301144
ENST00000413439	AC006293.3	2.20783	1.14263	2.20783	up	Ensembl	2127	chr19	+	55219699	55224955	downstream	NM_001080772	KIR2DL4	killer cell immunoglobulin-like receptor 2DL4	-2.08033	-1.05681	2.08033	down	chr19	+	55315066	55325972
ENST00000413439	AC006293.3	2.20783	1.14263	2.20783	up	Ensembl	2127	chr19	+	55219699	55224955	downstream	NM_133277	FCAR	immunoglobulin alpha Fc receptor isoform g	3.29984	1.7224	3.29984	up	chr19	+	55385548	55401839
ENST00000413439	AC006293.3	2.20783	1.14263	2.20783	up	Ensembl	2127	chr19	+	55219699	55224955	downstream	NM_001145458	NCR1	natural cytotoxicity triggering receptor 1	2.59513	1.37581	2.59513	up	chr19	+	55417507	55424439
uc002qym.1	AK124409	3.6614	1.87239	3.6614	up	UCSC_knowngene	2130	chr2	-	6869300	6910442	upstream	NM_014746	RNF144A	probable E3 ubiquitin-protein ligase RNF144A	-3.62355	-1.8574	3.62355	down	chr2	+	7057522	7184309
uc003gcl.1	AX747945	-2.04916	-1.03504	2.04916	down	UCSC_knowngene	2165	chr4	+	1145159	1147489	upstream	NM_032326	TMEM175	transmembrane protein 175	-2.61381	-1.38615	2.61381	down	chr4	+	926261	952443
uc003gcl.1	AX747945	-2.04916	-1.03504	2.04916	down	UCSC_knowngene	2165	chr4	+	1145159	1147489	downstream	NM_005882	MAEA	macrophage erythroblast attacher isoform 2	2.76207	1.46575	2.76207	up	chr4	+	1283671	1333925
NR_015447	LOC153684	-2.33719	-1.22477	2.33719	down	RefSeq_NR	2261	chr5	+	43042235	43045370	downstream	NM_003432	ZNF131	zinc finger protein 131	5.3294	2.41397	5.3294	up	chr5	+	43121641	43175823
ENST00000439050	AC009299.3	-12.8587	-3.68467	12.8587	down	Ensembl	2333	chr2	+	162101249	162105561	upstream	NM_133484	TANK	TRAF family member-associated NF-kappa-B	2.54855	1.34968	2.54855	up	chr2	+	161993465	162061490
ENST00000439050	AC009299.3	-12.8587	-3.68467	12.8587	down	Ensembl	2333	chr2	+	162101249	162105561	upstream	NM_004180	TANK	TRAF family member-associated NF-kappa-B	2.20981	1.14392	2.20981	up	chr2	+	161993465	162092682
NR_026883	HSPC072	5.96917	2.57753	5.96917	up	RefSeq_NR	1574	chr20	-	18768614	18775228	downstream	NM_006363	SEC23B	protein transport protein Sec23B isoform 1	2.19773	1.13602	2.19773	up	chr20	+	18488187	18542050
NR_027036	LOC100271722	-2.54943	-1.35018	2.54943	down	RefSeq_NR	1625	chr22	-	46435788	46440748	downstream	NM_001167621	ATXN10	ataxin-10 isoform 2	3.42901	1.77779	3.42901	up	chr22	+	46067677	46241187
NR_033376	NCRNA00222	-4.05385	-2.01929	4.05385	down	RefSeq_NR	1753	chr6	+	109072856	109091145	downstream	NM_032131	ARMC2	armadillo repeat-containing protein 2	-10.7859	-3.43107	10.7859	down	chr6	+	109169618	109295352
AK130929		-2.02036	-1.01461	2.02036	down	misc_RNA	1761	chr1	-	71246140	71247581	upstream	NM_198714	PTGER3	prostaglandin E2 receptor EP3 subtype isoform 4	-12.101	-3.59705	12.101	down	chr1	-	71318035	71513491
AK130929		-2.02036	-1.01461	2.02036	down	misc_RNA	1761	chr1	-	71246140	71247581	upstream	NM_198716	PTGER3	prostaglandin E2 receptor EP3 subtype isoform 6	-19.582	-4.29146	19.582	down	chr1	-	71318035	71513491
AK130929		-2.02036	-1.01461	2.02036	down	misc_RNA	1761	chr1	-	71246140	71247581	upstream	NM_198717	PTGER3	prostaglandin E2 receptor EP3 subtype isoform 7	-11.8404	-3.56564	11.8404	down	chr1	-	71318035	71513491
AK130929		-2.02036	-1.01461	2.02036	down	misc_RNA	1761	chr1	-	71246140	71247581	upstream	NM_198719	PTGER3	prostaglandin E2 receptor EP3 subtype isoform 4	-26.1805	-4.71042	26.1805	down	chr1	-	71436463	71513491
uc011djk.1	FLJ22536	4.66931	2.22321	4.66931	up	UCSC_knowngene	1806	chr6	+	21668877	22194614	upstream	NM_003107	SOX4	transcription factor SOX-4	4.25669	2.08973	4.25669	up	chr6	+	21593971	21598849
ENST00000416805	RP11-413E1.3	-3.39618	-1.76391	3.39618	down	Ensembl	1835	chr1	+	90229103	90235462	downstream	NM_182975	ZNF326	zinc finger protein 326 isoform 3	4.20719	2.07286	4.20719	up	chr1	+	90460677	90472000
ENST00000416805	RP11-413E1.3	-3.39618	-1.76391	3.39618	down	Ensembl	1835	chr1	+	90229103	90235462	downstream	NM_182976	ZNF326	zinc finger protein 326 isoform 1	3.71797	1.89451	3.71797	up	chr1	+	90460677	90494094
uc002rqj.1	AK057187	-3.7064	-1.89002	3.7064	down	UCSC_knowngene	1889	chr2	-	38053389	38056541	upstream	NM_000104	CYP1B1	cytochrome P450 1B1	3.3756	1.75514	3.3756	up	chr2	-	38294745	38303323
ENST00000326734	FAM87B	5.84326	2.54677	5.84326	up	Ensembl	1944	chr1	+	752750	755214	downstream	NM_198576	AGRN	agrin precursor	2.64083	1.40099	2.64083	up	chr1	+	955502	991492
AK055023		-2.00937	-1.00674	2.00937	down	misc_RNA	1974	chr10	-	72689681	72695453	downstream	NM_080722	ADAMTS14	A disintegrin and metalloproteinase with	5.90288	2.56142	5.90288	up	chr10	+	72432558	72522195
ENST00000423943	RP11-48O20.4	-8.6642	-3.11507	8.6642	down	Ensembl	1113	chr1	+	159931013	159948851	upstream	NM_003564	TAGLN2	transgelin-2	4.09471	2.03376	4.09471	up	chr1	-	159887902	159895284
ENST00000423943	RP11-48O20.4	-8.6642	-3.11507	8.6642	down	Ensembl	1113	chr1	+	159931013	159948851	downstream	NM_145167	PIGM	GPI mannosyltransferase 1	2.00396	1.00285	2.00396	up	chr1	-	159997461	160001783
uc001kat.2	CR592318	-2.6581	-1.4104	2.6581	down	UCSC_knowngene	1146	chr10	-	81451255	81586183	downstream	NM_001164645	SFTPA1	pulmonary surfactant-associated protein A1	-2.35826	-1.23772	2.35826	down	chr10	+	81370694	81375199
uc004bcx.2	BC017988	5.41112	2.43593	5.41112	up	UCSC_knowngene	1311	chr9	+	109213096	109367074	downstream	NM_021224	ZNF462	zinc finger protein 462	2.23523	1.16042	2.23523	up	chr9	+	109625377	109773796
ENST00000417705	RP11-54O7.3	-21.9406	-4.45553	21.9406	down	Ensembl	1389	chr1	-	852249	855072	upstream	NM_152486	SAMD11	sterile alpha motif domain-containing protein	-6.96959	-2.80107	6.96959	down	chr1	+	861120	879961
ENST00000417705	RP11-54O7.3	-21.9406	-4.45553	21.9406	down	Ensembl	1389	chr1	-	852249	855072	upstream	NM_198576	AGRN	agrin precursor	2.64083	1.40099	2.64083	up	chr1	+	955502	991492
uc002tkz.1	CR601322	-2.33745	-1.22494	2.33745	down	UCSC_knowngene	844	chr2	+	114737145	114764879	upstream	NM_025181	SLC35F5	solute carrier family 35 member F5	2.03618	1.02587	2.03618	up	chr2	-	114471932	114514400
ENST00000415195	XXbac-BPG249D20.9	-2.9251	-1.54849	2.9251	down	Ensembl	851	chr6	+	30484042	30486994	downstream	NM_001090	ABCF1	ATP-binding cassette sub-family F member 1	3.14594	1.65349	3.14594	up	chr6	+	30539169	30559309
uc003qod.2	BC031960	-3.41912	-1.77362	3.41912	down	UCSC_knowngene	883	chr6	-	151517809	151549592	downstream	NM_015440	MTHFD1L	monofunctional C1-tetrahydrofolate synthase,	2.84416	1.508	2.84416	up	chr6	+	151186690	151423023
uc001ker.1	BC082979	-2.00064	-1.00046	2.00064	down	UCSC_knowngene	888	chr10	+	89102678	89115182	upstream	NM_019054	FAM35A	hypothetical protein LOC54537	2.84933	1.51062	2.84933	up	chr10	+	88854952	88951222
uc001ker.1	BC082979	-2.00064	-1.00046	2.00064	down	UCSC_knowngene	888	chr10	+	89102678	89115182	downstream	NM_001178117	MINPP1	multiple inositol polyphosphate phosphatase 1	3.95151	1.9824	3.95151	up	chr10	+	89264222	89313218
uc001ker.1	BC082979	-2.00064	-1.00046	2.00064	down	UCSC_knowngene	888	chr10	+	89102678	89115182	downstream	NM_001178118	MINPP1	multiple inositol polyphosphate phosphatase 1	2.86119	1.51662	2.86119	up	chr10	+	89267589	89313218
ENST00000449713	AP001065.15	-2.64903	-1.40546	2.64903	down	Ensembl	912	chr21	+	45905459	45910171	upstream	NM_013369	DNMT3L	DNA (cytosine-5)-methyltransferase 3-like	109.162	6.77032	109.162	up	chr21	-	45666222	45682099
ENST00000449713	AP001065.15	-2.64903	-1.40546	2.64903	down	Ensembl	912	chr21	+	45905459	45910171	downstream	NM_198691	KRTAP10-1	keratin-associated protein 10-1	-3.03777	-1.60301	3.03777	down	chr21	-	45959067	45960078
ENST00000449713	AP001065.15	-2.64903	-1.40546	2.64903	down	Ensembl	912	chr21	+	45905459	45910171	downstream	NM_198695	KRTAP10-8	keratin-associated protein 10-8	-2.19626	-1.13505	2.19626	down	chr21	+	46031995	46032871
ENST00000449713	AP001065.15	-2.64903	-1.40546	2.64903	down	Ensembl	912	chr21	+	45905459	45910171	downstream	NM_198690	KRTAP10-9	keratin-associated protein 10-9	-3.79959	-1.92584	3.79959	down	chr21	+	46047039	46048295
ENST00000449713	AP001065.15	-2.64903	-1.40546	2.64903	down	Ensembl	912	chr21	+	45905459	45910171	downstream	NM_181688	KRTAP10-10	keratin-associated protein 10-10	3.25963	1.70471	3.25963	up	chr21	+	46057272	46058372
ENST00000432296	RP11-31E23.1	-3.73414	-1.90078	3.73414	down	Ensembl	930	chr1	-	198776786	198906539	downstream	NM_002838	PTPRC	receptor-type tyrosine-protein phosphatase C	-3.81533	-1.93181	3.81533	down	chr1	+	198608136	198726545
ENST00000450750	RP4-754E20__A.5	2.07804	1.05522	2.07804	up	Ensembl	951	chr22	+	43796336	43805687	upstream	NM_173050	SCUBE1	signal peptide, CUB and EGF-like	-2.09677	-1.06817	2.09677	down	chr22	-	43599229	43739355
uc001hmu.2	BC045735	-2.15651	-1.1087	2.15651	down	UCSC_knowngene	959	chr1	+	221002596	221005768	upstream	NM_018650	MARK1	serine/threonine-protein kinase MARK1	3.72093	1.89566	3.72093	up	chr1	+	220701567	220837799
uc001hmu.2	BC045735	-2.15651	-1.1087	2.15651	down	UCSC_knowngene	959	chr1	+	221002596	221005768	upstream	NM_022746	MOSC1	MOSC domain-containing protein 1, mitochondrial	7.92428	2.98628	7.92428	up	chr1	+	220960038	220987741
BC042185		3.48512	1.80121	3.48512	up	RNAdb	964	chr9	+	35646266	35647470	downstream	NM_014450	SIT1	signaling threshold-regulating transmembrane	-12.9424	-3.69404	12.9424	down	chr9	-	35649296	35650947
BC042185		3.48512	1.80121	3.48512	up	RNAdb	964	chr9	+	35646266	35647470	downstream	NM_001012446	C9orf128	hypothetical protein LOC392307	-4.26554	-2.09273	4.26554	down	chr9	-	35817013	35828744
ENST00000457725	AP003774.6	-3.37642	-1.75549	3.37642	down	Ensembl	985	chr11	-	64161813	64163303	downstream	NM_001039496	C11orf20	hypothetical protein LOC25858	-4.63752	-2.21335	4.63752	down	chr11	+	64067862	64072239
ENST00000457725	AP003774.6	-3.37642	-1.75549	3.37642	down	Ensembl	985	chr11	-	64161813	64163303	downstream	NM_001006944	RPS6KA4	ribosomal protein S6 kinase alpha-4 isoform b	2.0505	1.03598	2.0505	up	chr11	+	64126624	64139687
ENST00000451101	AC019172.2	-5.20791	-2.3807	5.20791	down	Ensembl	717	chr2	+	3891773	3895001	upstream	NM_001011	RPS7	40S ribosomal protein S7	4.79704	2.26215	4.79704	up	chr2	+	3622852	3628509
ENST00000414398	HCG24	-3.70981	-1.89134	3.70981	down	Ensembl	717	chr6	+	33112559	33115544	downstream	NM_080679	COL11A2	collagen alpha-2(XI) chain isoform 3	-3.738	-1.90227	3.738	down	chr6	-	33130468	33160245
ENST00000434384	AC004383.5	-2.70128	-1.43364	2.70128	down	Ensembl	724	chrX	+	133684002	133693953	upstream	NM_000194	HPRT1	hypoxanthine-guanine phosphoribosyltransferase	3.01179	1.59062	3.01179	up	chrX	+	133594174	133634698
ENST00000434384	AC004383.5	-2.70128	-1.43364	2.70128	down	Ensembl	724	chrX	+	133684002	133693953	downstream	NM_001170780	FAM122C	hypothetical protein LOC159091 isoform 3	3.98729	1.99541	3.98729	up	chrX	+	133930442	133957015
ENST00000434384	AC004383.5	-2.70128	-1.43364	2.70128	down	Ensembl	724	chrX	+	133684002	133693953	downstream	NM_001170784	FAM122C	hypothetical protein LOC159091 isoform 6	4.6326	2.21182	4.6326	up	chrX	+	133941204	133957015
ENST00000450860	RP5-1091N2.9	-4.24962	-2.08733	4.24962	down	Ensembl	726	chrX	-	70403408	70418025	upstream	NM_007363	NONO	non-POU domain-containing octamer-binding	5.83706	2.54524	5.83706	up	chrX	+	70503041	70521018
ENST00000367276	C9orf44	3.47813	1.79831	3.47813	up	Ensembl	738	chr9	+	94903579	94910588	upstream	NM_006415	SPTLC1	serine palmitoyltransferase 1 isoform a	2.06473	1.04595	2.06473	up	chr9	-	94793426	94877690
ENST00000367276	C9orf44	3.47813	1.79831	3.47813	up	Ensembl	738	chr9	+	94903579	94910588	downstream	NM_013417	IARS	isoleucyl-tRNA synthetase, cytoplasmic	2.42743	1.27943	2.42743	up	chr9	-	94972624	95055972
ENST00000442214	AC104654.1	3.10518	1.63468	3.10518	up	Ensembl	741	chr2	+	42104695	42120186	downstream	NM_001145076	EML4	echinoderm microtubule-associated protein-like 4	3.70313	1.88875	3.70313	up	chr2	+	42396489	42559688
ENST00000468538	RP1-149M18.4	-3.06792	-1.61726	3.06792	down	Ensembl	743	chr6	+	41373556	41374299	upstream	NM_018965	TREM2	triggering receptor expressed on myeloid cells 2	10.9311	3.45036	10.9311	up	chr6	-	41126245	41130922
ENST00000449954	AL078621.3	-7.89024	-2.98007	7.89024	down	Ensembl	745	chr2	+	114270039	114273062	downstream	NM_007082	RABL2A	rab-like protein 2A	-2.6792	-1.4218	2.6792	down	chr2	+	114384816	114400975
ENST00000449954	AL078621.3	-7.89024	-2.98007	7.89024	down	Ensembl	745	chr2	+	114270039	114273062	downstream	NM_025181	SLC35F5	solute carrier family 35 member F5	2.03618	1.02587	2.03618	up	chr2	-	114471932	114514400
ENST00000437920	RP1-148H17.1	-4.65675	-2.21932	4.65675	down	Ensembl	750	chr20	-	46020672	46041071	downstream	NM_005244	EYA2	eyes absent homolog 2 isoform a	-2.16198	-1.11235	2.16198	down	chr20	+	45523262	45817492
ENST00000412357	RP5-1114G22.2	-2.50567	-1.3252	2.50567	down	Ensembl	775	chr1	-	175172363	175173985	downstream	NM_014857	RABGAP1L	rab GTPase-activating protein 1-like isoform A	-2.12239	-1.08569	2.12239	down	chr1	+	174128633	174927327
ENST00000412357	RP5-1114G22.2	-2.50567	-1.3252	2.50567	down	Ensembl	775	chr1	-	175172363	175173985	downstream	NM_014656	KIAA0040	hypothetical protein LOC9674	-2.98182	-1.57619	2.98182	down	chr1	-	175126122	175161949
ENST00000412357	RP5-1114G22.2	-2.50567	-1.3252	2.50567	down	Ensembl	775	chr1	-	175172363	175173985	upstream	NM_003285	TNR	tenascin-R precursor	-2.03731	-1.02666	2.03731	down	chr1	-	175291934	175712752
ENST00000412772	RP11-134P9.3	-2.8037	-1.48733	2.8037	down	Ensembl	775	chr1	+	203256279	203257929	upstream	NM_001048230	ADORA1	adenosine receptor A1	2.0925	1.06523	2.0925	up	chr1	+	203096835	203136533
ENST00000412772	RP11-134P9.3	-2.8037	-1.48733	2.8037	down	Ensembl	775	chr1	+	203256279	203257929	upstream	NM_004997	MYBPH	myosin-binding protein H	5.52444	2.46583	5.52444	up	chr1	-	203136938	203144942
ENST00000412772	RP11-134P9.3	-2.8037	-1.48733	2.8037	down	Ensembl	775	chr1	+	203256279	203257929	upstream	NM_003465	CHIT1	chitotriosidase-1 precursor	3.96764	1.98828	3.96764	up	chr1	-	203185206	203198860
uc002qwn.1	BC043553	-2.15698	-1.10901	2.15698	down	UCSC_knowngene	776	chr2	-	780346	863877	upstream	NM_018968	SNTG2	gamma-2-syntrophin	-2.65939	-1.4111	2.65939	down	chr2	+	946553	1371384
ENST00000455039	RP11-426A6.7	2.02038	1.01463	2.02038	up	Ensembl	795	chr9	+	138359933	138364095	downstream	NM_144654	C9orf116	hypothetical protein LOC138162 isoform 2	-9.65844	-3.27179	9.65844	down	chr9	-	138387025	138391761
ENST00000455039	RP11-426A6.7	2.02038	1.01463	2.02038	up	Ensembl	795	chr9	+	138359933	138364095	downstream	NM_001018049	PAEP	glycodelin precursor	2.25405	1.17252	2.25405	up	chr9	+	138453603	138458622
ENST00000414488	AL132709.5	4.71211	2.23637	4.71211	up	Ensembl	800	chr14	+	101415314	101424887	upstream	NM_001134888	RTL1	retrotransposon-like protein 1	-2.91568	-1.54383	2.91568	down	chr14	-	101346991	101351184
ENST00000451118	WI2-85898F10.1	-2.93585	-1.55378	2.93585	down	Ensembl	805	chr22	-	46271878	46283628	downstream	NM_006486	FBLN1	fibulin-1 isoform D precursor	2.44698	1.291	2.44698	up	chr22	+	45898718	45997014
ENST00000451118	WI2-85898F10.1	-2.93585	-1.55378	2.93585	down	Ensembl	805	chr22	-	46271878	46283628	downstream	NM_013236	ATXN10	ataxin-10 isoform 1	2.28406	1.1916	2.28406	up	chr22	+	46067677	46241187
ENST00000457157	AP000688.8	-15.1411	-3.9204	15.1411	down	Ensembl	811	chr21	+	37377635	37379899	downstream	NM_001236	CBR3	carbonyl reductase [NADPH] 3	-2.02085	-1.01496	2.02085	down	chr21	+	37507262	37518860
ENST00000435421	RP11-143M1.3	-10.6437	-3.41193	10.6437	down	Ensembl	612	chr9	-	100803	102850	upstream	NM_203447	DOCK8	dedicator of cytokinesis protein 8 isoform 1	-3.37005	-1.75277	3.37005	down	chr9	+	214864	465259
ENST00000455966	RP1-224A6.3	-2.80728	-1.48917	2.80728	down	Ensembl	615	chr1	-	22350486	22351461	downstream	NM_007352	CELA3B	chymotrypsin-like elastase family member 3B	-2.00195	-1.0014	2.00195	down	chr1	+	22303417	22315847
ENST00000455966	RP1-224A6.3	-2.80728	-1.48917	2.80728	down	Ensembl	615	chr1	-	22350486	22351461	downstream	NM_005747	CELA3A	chymotrypsin-like elastase family member 3A	2.29294	1.1972	2.29294	up	chr1	+	22328148	22339035
ENST00000430519	RP11-476B1.1	-3.84319	-1.94231	3.84319	down	Ensembl	621	chr1	-	196014125	196030203	upstream	NM_198503	KCNT2	potassium channel subfamily T member 2	2.02356	1.0169	2.02356	up	chr1	-	196194912	196577499
ENST00000442197	AL132709.9	5.08062	2.34501	5.08062	up	Ensembl	625	chr14	+	101427363	101433377	upstream	NM_001134888	RTL1	retrotransposon-like protein 1	-2.91568	-1.54383	2.91568	down	chr14	-	101346991	101351184
uc001lln.2	AF086154	-2.13011	-1.09093	2.13011	down	UCSC_knowngene	632	chr10	-	134325131	134331695	downstream	NM_173575	STK32C	serine/threonine-protein kinase 32C	-5.994	-2.58352	5.994	down	chr10	-	134020995	134121477
uc001lln.2	AF086154	-2.13011	-1.09093	2.13011	down	UCSC_knowngene	632	chr10	-	134325131	134331695	downstream	NM_030626	LRRC27	leucine-rich repeat-containing protein 27	-3.66397	-1.87341	3.66397	down	chr10	+	134145613	134195010
ENST00000441665	AP002856.4	-2.66392	-1.41355	2.66392	down	Ensembl	635	chr11	+	131056916	131059648	downstream	NM_001048209	NTM	neurotrimin isoform 2	-2.33861	-1.22565	2.33861	down	chr11	+	131240370	132206716
ENST00000437113	RP11-214F16.4	-6.30056	-2.65548	6.30056	down	Ensembl	652	chr13	+	100229365	100232622	downstream	NM_206808	CLYBL	citrate lyase subunit beta-like protein,	-5.9589	-2.57505	5.9589	down	chr13	+	100258918	100549388
ENST00000437892	RP11-124L5.7	-2.12991	-1.09079	2.12991	down	Ensembl	674	chr10	+	86039746	86048751	upstream	NM_033100	CDHR1	cadherin-related family member 1 isoform 1	-5.15761	-2.3667	5.15761	down	chr10	+	85954411	85977121
ENST00000450671	RP3-475N16.1	-2.47606	-1.30805	2.47606	down	Ensembl	679	chr6	+	42908101	42911708	downstream	NM_018960	GNMT	glycine N-methyltransferase	-5.07989	-2.3448	5.07989	down	chr6	+	42928499	42931618
ENST00000449457	RP11-445P17.8	-4.99338	-2.32002	4.99338	down	Ensembl	692	chr10	-	5307995	5313199	upstream	NM_017422	CALML5	calmodulin-like protein 5	-7.72774	-2.95005	7.72774	down	chr10	-	5540657	5541533
ENST00000447883	RP11-277L2.3	-2.78441	-1.47737	2.78441	down	Ensembl	561	chr1	-	149576590	149577296	upstream	NM_001040874	HIST2H2AA4	histone H2A type 2-A	-3.05014	-1.60887	3.05014	down	chr1	+	149822627	149823161
ENST00000448327	RP11-345L23.1	-11.3234	-3.50124	11.3234	down	Ensembl	566	chr6	+	53493177	53496192	upstream	NM_001498	GCLC	glutamate--cysteine ligase catalytic subunit	2.02301	1.0165	2.02301	up	chr6	-	53362139	53409927
ENST00000443747	RP11-164D18.2	-2.34139	-1.22737	2.34139	down	Ensembl	566	chr20	+	58090245	58091094	downstream	NM_183246	PHACTR3	phosphatase and actin regulator 3 isoform 3	-2.42562	-1.27835	2.42562	down	chr20	+	58296264	58422766
ENST00000443303	RP3-523C21.1	-6.57951	-2.71798	6.57951	down	Ensembl	569	chr6	+	132455550	132490514	upstream	NM_006208	ENPP1	ectonucleotide pyrophosphatase/phosphodiesterase	-3.22021	-1.68716	3.22021	down	chr6	+	132129155	132216295
uc003zfy.2	AY343902	-3.46725	-1.79379	3.46725	down	UCSC_knowngene	581	chr9	-	100994	102941	upstream	NM_203447	DOCK8	dedicator of cytokinesis protein 8 isoform 1	-3.37005	-1.75277	3.37005	down	chr9	+	214864	465259
ENST00000452181	RP1-90G24.6	-2.81647	-1.49389	2.81647	down	Ensembl	590	chr22	+	32669406	32673173	downstream	NM_012179	FBXO7	F-box only protein 7 isoform 1	2.12837	1.08975	2.12837	up	chr22	+	32870706	32894818
ENST00000424705	RP3-461P17.10	-2.81473	-1.493	2.81473	down	Ensembl	514	chr20	+	44076041	44076982	upstream	NM_002638	PI3	elafin preproprotein	-122.612	-6.93796	122.612	down	chr20	+	43803539	43805185
ENST00000424705	RP3-461P17.10	-2.81473	-1.493	2.81473	down	Ensembl	514	chr20	+	44076041	44076982	upstream	NM_003064	SLPI	antileukoproteinase precursor	-259.48	-8.01948	259.48	down	chr20	-	43880878	43883206
ENST00000424705	RP3-461P17.10	-2.81473	-1.493	2.81473	down	Ensembl	514	chr20	+	44076041	44076982	upstream	NM_030590	MATN4	matrilin-4 isoform 2 precursor	-2.72828	-1.44799	2.72828	down	chr20	-	43922086	43936967
ENST00000424705	RP3-461P17.10	-2.81473	-1.493	2.81473	down	Ensembl	514	chr20	+	44076041	44076982	downstream	NM_006652	SPINT3	kunitz-type protease inhibitor 3 precursor	-3.14611	-1.65357	3.14611	down	chr20	-	44141100	44144264
ENST00000424705	RP3-461P17.10	-2.81473	-1.493	2.81473	down	Ensembl	514	chr20	+	44076041	44076982	downstream	NM_178455	SPINT4	kunitz-type protease inhibitor 4 precursor	-2.78161	-1.47592	2.78161	down	chr20	+	44350987	44354335
ENST00000456082	RP11-478H13.1	2.12688	1.08874	2.12688	up	Ensembl	517	chr10	+	29032673	29033592	upstream	NM_016628	WAC	WW domain-containing adapter protein with	2.14687	1.10223	2.14687	up	chr10	+	28822423	28909923
ENST00000422253	RP5-968D22.3	-2.125	-1.08746	2.125	down	Ensembl	519	chr1	-	168433451	168464882	downstream	NM_152902	TIPRL	TIP41-like protein isoform 1	2.96171	1.56643	2.96171	up	chr1	+	168148170	168171351
ENST00000422253	RP5-968D22.3	-2.125	-1.08746	2.125	down	Ensembl	519	chr1	-	168433451	168464882	downstream	NM_199344	SFT2D2	vesicle transport protein SFT2B	2.057	1.04054	2.057	up	chr1	+	168195254	168212088
ENST00000444862	AP005273.1	-3.53177	-1.82039	3.53177	down	Ensembl	522	chr11	+	64268324	64272858	upstream	NM_001177358	GPR137	integral membrane protein GPR137 isoform 5	3.63399	1.86155	3.63399	up	chr11	+	64052282	64056972
ENST00000444862	AP005273.1	-3.53177	-1.82039	3.53177	down	Ensembl	522	chr11	+	64268324	64272858	downstream	NM_153378	SLC22A12	solute carrier family 22 member 12 isoform b	-3.73248	-1.90013	3.73248	down	chr11	+	64358281	64369820
ENST00000444862	AP005273.1	-3.53177	-1.82039	3.53177	down	Ensembl	522	chr11	+	64268324	64272858	downstream	NM_001178031	SF1	splicing factor 1 isoform 5	-2.9482	-1.55983	2.9482	down	chr11	-	64532075	64545232
ENST00000442712	RP11-439E19.7	-2.15584	-1.10825	2.15584	down	Ensembl	522	chr1	+	246853348	246855123	downstream	NM_020394	ZNF695	zinc finger protein 695 isoform 1	8.0401	3.00721	8.0401	up	chr1	-	247148624	247171395
ENST00000441085	RP11-98G7.1	5.9453	2.57175	5.9453	up	Ensembl	523	chr1	-	156416203	156426258	downstream	NM_198406	PAQR6	progestin and adipoQ receptor family member 6	2.39359	1.25917	2.39359	up	chr1	-	156213208	156217792
ENST00000441085	RP11-98G7.1	5.9453	2.57175	5.9453	up	Ensembl	523	chr1	-	156416203	156426258	upstream	NM_198427	BCAN	brevican core protein isoform 2	-6.08054	-2.6042	6.08054	down	chr1	+	156611739	156623264
ENST00000441085	RP11-98G7.1	5.9453	2.57175	5.9453	up	Ensembl	523	chr1	-	156416203	156426258	upstream	NM_145729	MRPL24	39S ribosomal protein L24, mitochondrial	2.07215	1.05113	2.07215	up	chr1	-	156707093	156710923
ENST00000448282	RP1-102H19.6	4.53437	2.1809	4.53437	up	Ensembl	542	chr6	+	88081310	88102519	upstream	NM_015021	ZNF292	zinc finger protein 292	2.2909	1.19592	2.2909	up	chr6	+	87865268	87973406
ENST00000448282	RP1-102H19.6	4.53437	2.1809	4.53437	up	Ensembl	542	chr6	+	88081310	88102519	downstream	NM_001031743	C6orf165	hypothetical protein LOC154313	-30.3705	-4.9246	30.3705	down	chr6	+	88117689	88174191
ENST00000425609	RP11-460G11.1	-5.2757	-2.39936	5.2757	down	Ensembl	547	chr13	+	43732766	43733602	upstream	NM_033255	EPSTI1	epithelial-stromal interaction protein 1 isoform	4.31687	2.10998	4.31687	up	chr13	-	43462121	43566377
uc004fnm.2	U00684	2.41863	1.27419	2.41863	up	UCSC_knowngene	552	chrX	+	154697946	154716706	upstream	NM_003372	VBP1	prefoldin subunit 3	4.14156	2.05017	4.14156	up	chrX	+	154444700	154468098
uc004fnm.2	U00684	2.41863	1.27419	2.41863	up	UCSC_knowngene	552	chrX	+	154697946	154716706	upstream	NM_012151	F8A1	factor VIII intron 22 protein	-3.3701	-1.75279	3.3701	down	chrX	+	154611748	154613450
ENST00000439823	AC002480.4	4.19941	2.07019	4.19941	up	Ensembl	557	chr7	+	22629323	22631241	downstream	NM_000600	IL6	interleukin-6 precursor	5.65721	2.50009	5.65721	up	chr7	+	22766765	22771621
ENST00000438287	RP4-738P15.1	-2.02661	-1.01907	2.02661	down	Ensembl	468	chr20	-	25123875	25129894	downstream	NM_003650	CST7	cystatin-F precursor	-2.5074	-1.32619	2.5074	down	chr20	+	24929865	24940564
ENST00000438287	RP4-738P15.1	-2.02661	-1.01907	2.02661	down	Ensembl	468	chr20	-	25123875	25129894	upstream	NM_021067	GINS1	DNA replication complex GINS protein PSF1	14.7366	3.88133	14.7366	up	chr20	+	25388322	25429191
ENST00000457239	RP11-71G12.1	-10.7448	-3.42557	10.7448	down	Ensembl	471	chr1	+	157155177	157157195	upstream	NM_144702	LRRC71	leucine-rich repeat-containing protein 71	-157.307	-7.29744	157.307	down	chr1	+	156890423	156902880
ENST00000434596	RP11-503C24.3	-4.78803	-2.25943	4.78803	down	Ensembl	473	chr6	+	168630411	168641395	upstream	NM_030615	KIF25	kinesin-like protein KIF25 isoform 1	-2.7343	-1.45117	2.7343	down	chr6	+	168418552	168445769
ENST00000438797	RP1-159G19.1	-7.6395	-2.93348	7.6395	down	Ensembl	481	chr6	-	80513299	80516942	downstream	NM_031469	SH3BGRL2	SH3 domain-binding glutamic acid-rich-like	2.07552	1.05348	2.07552	up	chr6	+	80340999	80413369
ENST00000412797	RP11-70P17.1	-8.93866	-3.16006	8.93866	down	Ensembl	483	chr1	+	25907968	25916847	downstream	NM_020379	MAN1C1	mannosyl-oligosaccharide 1,2-alpha-mannosidase	-2.10011	-1.07046	2.10011	down	chr1	+	25943958	26111258
ENST00000412797	RP11-70P17.1	-8.93866	-3.16006	8.93866	down	Ensembl	483	chr1	+	25907968	25916847	downstream	NM_020451	SEPN1	selenoprotein N isoform 1 precursor	-6.10927	-2.611	6.10927	down	chr1	+	26126666	26144713
ENST00000420876	RP11-511I2.2	-6.38409	-2.67448	6.38409	down	Ensembl	483	chr1	-	47846599	47874149	downstream	NM_001136140	CMPK1	UMP-CMP kinase isoform b	2.75724	1.46322	2.75724	up	chr1	+	47799468	47844511
ENST00000420876	RP11-511I2.2	-6.38409	-2.67448	6.38409	down	Ensembl	483	chr1	-	47846599	47874149	downstream	NM_016308	CMPK1	UMP-CMP kinase isoform a	2.08736	1.06168	2.08736	up	chr1	+	47799468	47844511
ENST00000416842	AP001042.1	-2.01776	-1.01275	2.01776	down	Ensembl	487	chr21	+	40218170	40220568	upstream	NM_005239	ETS2	protein C-ets-2	2.45568	1.29612	2.45568	up	chr21	+	40177848	40196878
ENST00000429601	RP11-368D24__A.1	2.20165	1.13859	2.20165	up	Ensembl	487	chrX	+	64808277	64820630	upstream	NM_001010888	ZC3H12B	probable ribonuclease ZC3H12B	-2.13721	-1.09573	2.13721	down	chrX	+	64708614	64727767
ENST00000446145	RP11-239E10.3	5.47742	2.4535	5.47742	up	Ensembl	487	chr1	+	223354485	223361496	upstream	NM_003268	TLR5	toll-like receptor 5 precursor	3.90908	1.96683	3.90908	up	chr1	-	223282747	223316624
ENST00000438829	RP11-413P11.1	-4.13048	-2.04631	4.13048	down	Ensembl	495	chr1	-	99937917	99999571	upstream	NM_017734	PALMD	palmdelphin	-6.35611	-2.66814	6.35611	down	chr1	+	100111430	100160097
uc001hpx.2	BC032899	6.57036	2.71597	6.57036	up	UCSC_knowngene	502	chr1	+	226271655	226277990	upstream	NM_003133	SRP9	signal recognition particle 9 kDa protein	3.36192	1.74928	3.36192	up	chr1	+	225965514	225978168
uc001hpx.2	BC032899	6.57036	2.71597	6.57036	up	UCSC_knowngene	502	chr1	+	226271655	226277990	upstream	NM_000120	EPHX1	epoxide hydrolase 1	-341.769	-8.41688	341.769	down	chr1	+	226013001	226033262
uc001hpx.2	BC032899	6.57036	2.71597	6.57036	up	UCSC_knowngene	502	chr1	+	226271655	226277990	downstream	NM_173083	LIN9	protein lin-9 homolog	10.6261	3.40954	10.6261	up	chr1	-	226418860	226497198
ENST00000414795	AC017076.5	5.14111	2.36208	5.14111	up	Ensembl	506	chr2	-	6969010	6980595	upstream	NM_080657	RSAD2	radical S-adenosyl methionine domain-containing	15.9637	3.99672	15.9637	up	chr2	+	7017795	7038363
ENST00000423924	RP11-535M15.1	2.33162	1.22133	2.33162	up	Ensembl	425	chr9	+	99449337	99483403	upstream	NM_014282	HABP4	intracellular hyaluronan-binding protein 4	-2.51729	-1.33187	2.51729	down	chr9	+	99212413	99253618
ENST00000446713	RP11-298J20.1	-2.10026	-1.07057	2.10026	down	Ensembl	430	chr10	-	126617451	126619962	downstream	NM_032182	FAM175B	BRISC complex subunit Abro1	2.845	1.50843	2.845	up	chr10	+	126490353	126525239
ENST00000428641	RP11-66D17.5	-2.55196	-1.3516	2.55196	down	Ensembl	433	chr1	-	156682003	156682966	upstream	NM_145729	MRPL24	39S ribosomal protein L24, mitochondrial	2.07215	1.05113	2.07215	up	chr1	-	156707093	156710923
ENST00000428641	RP11-66D17.5	-2.55196	-1.3516	2.55196	down	Ensembl	433	chr1	-	156682003	156682966	upstream	NM_001080471	PEAR1	platelet endothelial aggregation receptor 1	-2.20096	-1.13814	2.20096	down	chr1	+	156863522	156886226
uc010nxz.1	FLJ39609	-2.97187	-1.57137	2.97187	down	UCSC_knowngene	436	chr1	-	852952	854817	upstream	NM_005101	ISG15	ubiquitin-like protein ISG15 precursor	6.79802	2.76511	6.79802	up	chr1	+	948846	949919
uc010nxz.1	FLJ39609	-2.97187	-1.57137	2.97187	down	UCSC_knowngene	436	chr1	-	852952	854817	upstream	NM_001130045	TTLL10	inactive polyglycylase TTLL10 isoform 1	-8.08869	-3.01591	8.08869	down	chr1	+	1109285	1133313
uc010nxz.1	FLJ39609	-2.97187	-1.57137	2.97187	down	UCSC_knowngene	436	chr1	-	852952	854817	upstream	NM_153254	TTLL10	inactive polyglycylase TTLL10 isoform 2	-4.73587	-2.24363	4.73587	down	chr1	+	1115076	1121243
ENST00000456537	AC004448.5	2.08717	1.06155	2.08717	up	Ensembl	441	chr17	-	19342455	19364048	downstream	NM_007148	RNF112	RING finger protein 112	-5.53362	-2.46822	5.53362	down	chr17	+	19314490	19320589
ENST00000440492	RP11-288L9.1	10.5977	3.40568	10.5977	up	Ensembl	441	chr1	-	27986838	27989233	upstream	NM_022872	IFI6	interferon alpha-inducible protein 6 isoform b	6.00243	2.58555	6.00243	up	chr1	-	27992571	27998724
ENST00000440492	RP11-288L9.1	10.5977	3.40568	10.5977	up	Ensembl	441	chr1	-	27986838	27989233	upstream	NM_018053	XKR8	XK-related protein 8	-2.14942	-1.10395	2.14942	down	chr1	+	28286503	28294604
ENST00000425150	RP11-348F1.3	2.24471	1.16653	2.24471	up	Ensembl	451	chrX	-	51099795	51139314	downstream	NM_153183	NUDT10	diphosphoinositol polyphosphate phosphohydrolase	2.67471	1.41938	2.67471	up	chrX	+	51075082	51080377
ENST00000446401	AC104653.1	-2.13978	-1.09746	2.13978	down	Ensembl	390	chr2	-	114588764	114600933	downstream	NM_013412	RABL2A	rab-like protein 2A	-3.5553	-1.82997	3.5553	down	chr2	+	114384816	114400975
ENST00000418403	RP11-462G2.1	-2.87986	-1.526	2.87986	down	Ensembl	397	chr6	+	71104589	71109120	downstream	NM_001105531	FAM135A	hypothetical protein LOC57579 isoform a	2.64826	1.40504	2.64826	up	chr6	+	71123106	71270877
ENST00000429853	RP4-726N1.2	4.98415	2.31735	4.98415	up	Ensembl	400	chr20	+	18040136	18051652	upstream	NM_052865	C20orf72	hypothetical protein LOC92667	2.18285	1.12621	2.18285	up	chr20	+	17949761	17971762
ENST00000415726	RP11-336K24.5	-4.82578	-2.27076	4.82578	down	Ensembl	401	chr1	+	155961180	155971578	downstream	NM_198406	PAQR6	progestin and adipoQ receptor family member 6	2.39359	1.25917	2.39359	up	chr1	-	156213208	156217792
ENST00000412855	RP11-396C23.2	2.91526	1.54362	2.91526	up	Ensembl	407	chr1	+	226274581	226277993	downstream	NM_173083	LIN9	protein lin-9 homolog	10.6261	3.40954	10.6261	up	chr1	-	226418860	226497198
ENST00000438178	AC008278.2	-9.62635	-3.26699	9.62635	down	Ensembl	409	chr2	+	15704293	15713992	downstream	NM_004939	DDX1	ATP-dependent RNA helicase DDX1	2.28355	1.19128	2.28355	up	chr2	+	15731769	15771225
ENST00000444744	RP11-428O18.4	-2.19482	-1.1341	2.19482	down	Ensembl	420	chr13	-	27810418	27810948	upstream	NM_206827	RASL11A	ras-like protein family member 11A	-2.48612	-1.31389	2.48612	down	chr13	+	27844463	27847827
ENST00000442416	AC009502.3	-2.16594	-1.115	2.16594	down	Ensembl	361	chr2	+	220594831	220602464	upstream	NM_182847	ACCN4	amiloride-sensitive cation channel 4 isoform 2	-2.52217	-1.33467	2.52217	down	chr2	+	220378891	220403494
ENST00000437899	RP11-38L15.2	-2.35697	-1.23693	2.35697	down	Ensembl	369	chr10	-	46937462	46951699	upstream	NM_181519	SYT15	synaptotagmin-15 isoform b	-3.34072	-1.74016	3.34072	down	chr10	-	46955443	46970601
ENST00000437899	RP11-38L15.2	-2.35697	-1.23693	2.35697	down	Ensembl	369	chr10	-	46937462	46951699	upstream	NM_014696	GPRIN2	G protein-regulated inducer of neurite outgrowth	-27.0347	-4.75674	27.0347	down	chr10	+	46993545	47000568
ENST00000437631	RP13-221M14.2	2.17553	1.12137	2.17553	up	Ensembl	384	chr1	+	13146776	13147256	upstream	NM_001146181	LOC649330	heterogeneous nuclear ribonucleoprotein C-like	3.46264	1.79187	3.46264	up	chr1	-	12907235	12908237
ENST00000437631	RP13-221M14.2	2.17553	1.12137	2.17553	up	Ensembl	384	chr1	+	13146776	13147256	upstream	NM_001012276	PRAMEF8	PRAME family member 8	-2.0711	-1.0504	2.0711	down	chr1	+	12976449	12980568
ENST00000421153	RP4-811H24.8	-3.90309	-1.96462	3.90309	down	Ensembl	267	chr1	+	32817121	32819143	upstream	NM_024296	CCDC28B	coiled-coil domain-containing protein 28B	3.05759	1.6124	3.05759	up	chr1	+	32666201	32670991
ENST00000421153	RP4-811H24.8	-3.90309	-1.96462	3.90309	down	Ensembl	267	chr1	+	32817121	32819143	upstream	NM_001099434	DCDC2B	doublecortin domain-containing protein 2B	-777.282	-9.60229	777.282	down	chr1	+	32674694	32681797
ENST00000443579	RP1-159A19.4	-2.10259	-1.07217	2.10259	down	Ensembl	283	chr1	+	27852315	27857072	upstream	NM_004672	MAP3K6	mitogen-activated protein kinase kinase kinase	-2.07254	-1.0514	2.07254	down	chr1	-	27681669	27693337
ENST00000443579	RP1-159A19.4	-2.10259	-1.07217	2.10259	down	Ensembl	283	chr1	+	27852315	27857072	downstream	NM_022872	IFI6	interferon alpha-inducible protein 6 isoform b	6.00243	2.58555	6.00243	up	chr1	-	27992571	27998724
ENST00000434589	AP001043.1	2.01597	1.01147	2.01597	up	Ensembl	288	chr21	+	40260695	40275829	upstream	NM_005239	ETS2	protein C-ets-2	2.45568	1.29612	2.45568	up	chr21	+	40177848	40196878
ENST00000428814	RP11-432J24.2	-2.97482	-1.5728	2.97482	down	Ensembl	297	chr10	+	134232586	134234457	upstream	NM_173575	STK32C	serine/threonine-protein kinase 32C	-5.994	-2.58352	5.994	down	chr10	-	134020995	134121477
ENST00000428814	RP11-432J24.2	-2.97482	-1.5728	2.97482	down	Ensembl	297	chr10	+	134232586	134234457	upstream	NM_030626	LRRC27	leucine-rich repeat-containing protein 27	-3.66397	-1.87341	3.66397	down	chr10	+	134145613	134195010
ENST00000444515	C1orf46	-14.1653	-3.82429	14.1653	down	Ensembl	302	chr1	+	152627952	152629280	upstream	NM_019060	CRCT1	cysteine-rich C-terminal protein 1	-955.224	-9.89969	955.224	down	chr1	+	152486977	152488481
ENST00000444515	C1orf46	-14.1653	-3.82429	14.1653	down	Ensembl	302	chr1	+	152627952	152629280	downstream	NM_001025231	KPRP	keratinocyte proline-rich protein	-119.099	-6.89602	119.099	down	chr1	+	152730505	152734529
ENST00000444515	C1orf46	-14.1653	-3.82429	14.1653	down	Ensembl	302	chr1	+	152627952	152629280	downstream	NM_178351	LCE1C	late cornified envelope protein 1C	2.26426	1.17904	2.26426	up	chr1	-	152777310	152779107
ENST00000442526	RP11-517P14.2	3.53542	1.82188	3.53542	up	Ensembl	303	chr10	+	43916046	43917254	upstream	NM_020630	RET	proto-oncogene tyrosine-protein kinase receptor	-4.46416	-2.15839	4.46416	down	chr10	+	43572516	43622952
ENST00000442526	RP11-517P14.2	3.53542	1.82188	3.53542	up	Ensembl	303	chr10	+	43916046	43917254	upstream	NM_020975	RET	proto-oncogene tyrosine-protein kinase receptor	-6.79969	-2.76547	6.79969	down	chr10	+	43572516	43625797
ENST00000442526	RP11-517P14.2	3.53542	1.82188	3.53542	up	Ensembl	303	chr10	+	43916046	43917254	upstream	NM_018590	CSGALNACT2	chondroitin sulfate	3.07271	1.61951	3.07271	up	chr10	+	43633933	43680749
ENST00000442526	RP11-517P14.2	3.53542	1.82188	3.53542	up	Ensembl	303	chr10	+	43916046	43917254	upstream	NM_001098205	HNRNPF	heterogeneous nuclear ribonucleoprotein F	-3.8673	-1.95133	3.8673	down	chr10	-	43881064	43904332
ENST00000442526	RP11-517P14.2	3.53542	1.82188	3.53542	up	Ensembl	303	chr10	+	43916046	43917254	upstream	NM_001098204	HNRNPF	heterogeneous nuclear ribonucleoprotein F	2.4226	1.27656	2.4226	up	chr10	-	43881064	43904696
ENST00000442526	RP11-517P14.2	3.53542	1.82188	3.53542	up	Ensembl	303	chr10	+	43916046	43917254	downstream	NM_145312	ZNF485	zinc finger protein 485	2.38319	1.25289	2.38319	up	chr10	+	44101854	44113352
ENST00000411791	FAM25E	-4.0684	-2.02446	4.0684	down	Ensembl	322	chr10	-	46310875	46312772	downstream	NM_001002265	MARCH8	E3 ubiquitin-protein ligase MARCH8 isoform 6	-2.4893	-1.31574	2.4893	down	chr10	-	45952816	46090354
ENST00000440189	RP11-179B15.5	-3.63971	-1.86382	3.63971	down	Ensembl	328	chr10	+	60064312	60065381	downstream	NM_003338	UBE2D1	ubiquitin-conjugating enzyme E2 D1 isoform 1	2.19379	1.13343	2.19379	up	chr10	+	60094738	60130513
ENST00000440189	RP11-179B15.5	-3.63971	-1.86382	3.63971	down	Ensembl	328	chr10	+	60064312	60065381	downstream	NM_003201	TFAM	transcription factor A, mitochondrial precursor	4.31711	2.11006	4.31711	up	chr10	+	60145175	60155897
ENST00000440189	RP11-179B15.5	-3.63971	-1.86382	3.63971	down	Ensembl	328	chr10	+	60064312	60065381	downstream	NM_001080512	BICC1	protein bicaudal C homolog 1	2.64984	1.40591	2.64984	up	chr10	+	60272903	60588845
ENST00000452795	RP4-798A10.4	-4.28264	-2.0985	4.28264	down	Ensembl	342	chr1	+	16847188	16848303	upstream	NM_001145278	NECAP2	adaptin ear-binding coat-associated protein 2	3.20198	1.67896	3.20198	up	chr1	+	16767166	16786584
ENST00000417443	NCRNA00086	-2.75079	-1.45985	2.75079	down	Ensembl	2913	chrX	+	134555867	134559682	upstream	NM_152695	ZNF449	zinc finger protein 449	2.37044	1.24516	2.37044	up	chrX	+	134478695	134497338
NR_033370	LOC63930	-3.16825	-1.66369	3.16825	down	RefSeq_NR	3366	chr20	+	61640734	61716423	upstream	NM_017896	C20orf11	protein C20orf11	5.09793	2.34991	5.09793	up	chr20	+	61569440	61579827
NR_033370	LOC63930	-3.16825	-1.66369	3.16825	down	RefSeq_NR	3366	chr20	+	61640734	61716423	downstream	NM_000744	CHRNA4	neuronal acetylcholine receptor subunit alpha-4	-8.67362	-3.11663	8.67362	down	chr20	-	61974664	61992695
uc002khh.2	LOC388312	2.49442	1.3187	2.49442	up	UCSC_knowngene	4812	chr1	-	661139	679736	upstream	NM_005101	ISG15	ubiquitin-like protein ISG15 precursor	6.79802	2.76511	6.79802	up	chr1	+	948846	949919
NR_026790	HCG11	2.03793	1.02711	2.03793	up	RefSeq_NR	5688	chr6	+	26521933	26527610	upstream	NM_003540	HIST1H4F	histone H4	-2.85363	-1.5128	2.85363	down	chr6	+	26240653	26241021
NR_026790	HCG11	2.03793	1.02711	2.03793	up	RefSeq_NR	5688	chr6	+	26521933	26527610	upstream	NM_001732	BTN1A1	butyrophilin subfamily 1 member A1 precursor	-6.2746	-2.64952	6.2746	down	chr6	+	26501494	26510652
ENST00000450248	TUG1	3.46278	1.79193	3.46278	up	Ensembl	6477	chr22	+	31365642	31374831	downstream	NM_006932	SMTN	smoothelin isoform c	3.4737	1.79647	3.4737	up	chr22	+	31477304	31500609
ENST00000450248	TUG1	3.46278	1.79193	3.46278	up	Ensembl	6477	chr22	+	31365642	31374831	downstream	NM_001002837	INPP5J	phosphatidylinositol 4,5-bisphosphate	2.62366	1.39158	2.62366	up	chr22	+	31518960	31530683
ENST00000450248	TUG1	3.46278	1.79193	3.46278	up	Ensembl	6477	chr22	+	31365642	31374831	downstream	NM_005569	LIMK2	LIM domain kinase 2 isoform 2a	-2.10832	-1.0761	2.10832	down	chr22	+	31608249	31676066
NR_027418	LOC651250	-2.42221	-1.27632	2.42221	down	RefSeq_NR	11210	chr17	+	66097695	66132068	upstream	NM_004459	BPTF	nucleosome-remodeling factor subunit BPTF	2.10423	1.07329	2.10423	up	chr17	+	65821779	65980494
NR_027418	LOC651250	-2.42221	-1.27632	2.42221	down	RefSeq_NR	11210	chr17	+	66097695	66132068	downstream	NM_001033574	AMZ2	archaemetzincin-2 isoform 2	3.09218	1.62862	3.09218	up	chr17	+	66244144	66253305
ENST00000439207	RP11-568A7.2	-2.3282	-1.21921	2.3282	down	Ensembl	205	chr6	+	167655378	167659404	upstream	NM_031409	CCR6	C-C chemokine receptor type 6	-9.96621	-3.31705	9.96621	down	chr6	+	167536240	167552629
ENST00000415471	RP11-100G15.10	-2.29238	-1.19684	2.29238	down	Ensembl	211	chr9	-	94912662	94919727	downstream	NM_006415	SPTLC1	serine palmitoyltransferase 1 isoform a	2.06473	1.04595	2.06473	up	chr9	-	94793426	94877690
ENST00000415471	RP11-100G15.10	-2.29238	-1.19684	2.29238	down	Ensembl	211	chr9	-	94912662	94919727	upstream	NM_017680	ASPN	asporin isoform 1 preproprotein	116.075	6.85892	116.075	up	chr9	-	95218488	95244844
ENST00000435617	RP11-279N8.2	-3.4995	-1.80715	3.4995	down	Ensembl	215	chr13	-	48479463	48481492	upstream	NM_018283	NUDT15	probable 7,8-dihydro-8-oxoguanine triphosphatase	2.67556	1.41984	2.67556	up	chr13	+	48611702	48621282
ENST00000434255	RP1-32B1.4	3.12379	1.6433	3.12379	up	Ensembl	216	chr6	+	135581133	135582071	upstream	NM_001145207	HBS1L	HBS1-like protein isoform 3	2.38957	1.25675	2.38957	up	chr6	-	135356994	135376036
ENST00000366181	RP11-296A18.3	2.27203	1.18398	2.27203	up	Ensembl	2366	chr1	-	51660766	51700768	downstream	NM_001262	CDKN2C	cyclin-dependent kinase 4 inhibitor C	2.1237	1.08658	2.1237	up	chr1	+	51434366	51440306
ENST00000437515	AL358175.1	2.53736	1.34333	2.53736	up	Ensembl	2504	chr1	-	121102016	121139765	downstream	NM_001100910	FAM72B	amyloid-beta peptide-induced protein p17	11.4875	3.52199	11.4875	up	chr1	+	120839004	120855681
ENST00000512967	AL031123.1	-2.8727	-1.52241	2.8727	down	Ensembl	2641	chr6	-	6695026	6700720	downstream	NM_004271	LY86	lymphocyte antigen 86 precursor	-3.40445	-1.76742	3.40445	down	chr6	+	6588933	6655216
ENST00000433673	AC068282.3	9.37023	3.22808	9.37023	up	Ensembl	2690	chr2	+	128146705	128158156	upstream	NM_139348	BIN1	myc box-dependent-interacting protein 1 isoform	-2.92991	-1.55085	2.92991	down	chr2	-	127805606	127864864
NR_027085	LOC284551	-3.38973	-1.76117	3.38973	down	RefSeq_NR	2741	chr1	+	31984035	31989846	downstream	NM_022164	TINAGL1	tubulointerstitial nephritis antigen-like	-2.14663	-1.10207	2.14663	down	chr1	+	32042085	32053287
uc001jef.2	LOC643650	8.27207	3.04825	8.27207	up	UCSC_knowngene	2876	chr10	-	47096454	47151400	downstream	NM_181519	SYT15	synaptotagmin-15 isoform b	-3.34072	-1.74016	3.34072	down	chr10	-	46955443	46970601
uc002khh.2	LOC388312	2.49442	1.3187	2.49442	up	UCSC_knowngene	4812	chr1	-	661139	679736	upstream	NM_152486	SAMD11	sterile alpha motif domain-containing protein	-6.96959	-2.80107	6.96959	down	chr1	+	861120	879961
uc002khh.2	LOC388312	2.49442	1.3187	2.49442	up	UCSC_knowngene	4812	chr1	-	661139	679736	upstream	NM_021170	HES4	transcription factor HES-4 isoform 2	3.35234	1.74517	3.35234	up	chr1	-	934341	935552
ENST00000484550	AC093627.10	-31.6071	-4.98218	31.6071	down	Ensembl	5008	chr7	+	149596	155465	downstream	NM_020223	FAM20C	dentin matrix protein 4	2.91406	1.54303	2.91406	up	chr7	+	192968	300711
NR_027341	C9orf44	-2.39409	-1.25948	2.39409	down	RefSeq_NR	2000	chr9	+	94903748	94921890	downstream	NM_017680	ASPN	asporin isoform 1 preproprotein	116.075	6.85892	116.075	up	chr9	-	95218488	95244844
uc002ubt.1	AK027541	-10.3775	-3.37538	10.3775	down	UCSC_knowngene	2013	chr2	+	162101249	162105241	upstream	NM_133484	TANK	TRAF family member-associated NF-kappa-B	2.54855	1.34968	2.54855	up	chr2	+	161993465	162061490
uc002qgt.1	BC131616	-4.17945	-2.06331	4.17945	down	UCSC_knowngene	2014	chr19	+	55219699	55224842	upstream	NM_021270	LAIR2	leukocyte-associated immunoglobulin-like	-3.30263	-1.72362	3.30263	down	chr19	+	55014012	55021900
uc002qgt.1	BC131616	-4.17945	-2.06331	4.17945	down	UCSC_knowngene	2014	chr19	+	55219699	55224842	upstream	NM_001130917	LILRA2	leukocyte immunoglobulin-like receptor subfamily	-2.34144	-1.22739	2.34144	down	chr19	+	55085256	55099027
uc002qgt.1	BC131616	-4.17945	-2.06331	4.17945	down	UCSC_knowngene	2014	chr19	+	55219699	55224842	downstream	NM_013289	KIR3DL1	killer cell immunoglobulin-like receptor 3DL1	-2.64762	-1.4047	2.64762	down	chr19	+	55327892	55342233
ENST00000449605	RP11-147O5.1	4.06024	2.02156	4.06024	up	Ensembl	7619	chrX	+	21911717	21920026	upstream	NM_001168648	CNKSR2	connector enhancer of kinase suppressor of ras 2	-4.77504	-2.25551	4.77504	down	chrX	+	21392535	21660980
ENST00000449605	RP11-147O5.1	4.06024	2.02156	4.06024	up	Ensembl	7619	chrX	+	21911717	21920026	upstream	NM_153270	KLHL34	kelch-like protein 34	-5.00308	-2.32282	5.00308	down	chrX	-	21673608	21676448
NR_027418	LOC651250	-2.42221	-1.27632	2.42221	down	RefSeq_NR	11210	chr17	+	66097695	66132068	upstream	NM_002266	KPNA2	importin subunit alpha-2	2.16761	1.11611	2.16761	up	chr17	+	66031847	66042970
NR_026951	C17orf44	-2.02643	-1.01894	2.02643	down	RefSeq_NR	2115	chr17	-	8123948	8127361	downstream	NM_014232	VAMP2	vesicle-associated membrane protein 2	-3.56096	-1.83226	3.56096	down	chr17	-	8062464	8066293
NR_026951	C17orf44	-2.02643	-1.01894	2.02643	down	RefSeq_NR	2115	chr17	-	8123948	8127361	upstream	NM_001177801	RANGRF	ran guanine nucleotide release factor isoform B	-3.10008	-1.63231	3.10008	down	chr17	+	8191968	8193409
NR_026951	C17orf44	-2.02643	-1.01894	2.02643	down	RefSeq_NR	2115	chr17	-	8123948	8127361	upstream	NM_000987	RPL26	60S ribosomal protein L26	2.48897	1.31555	2.48897	up	chr17	-	8280833	8286565
ENST00000413439	AC006293.3	2.20783	1.14263	2.20783	up	Ensembl	2127	chr19	+	55219699	55224955	upstream	NM_021270	LAIR2	leukocyte-associated immunoglobulin-like	-3.30263	-1.72362	3.30263	down	chr19	+	55014012	55021900
ENST00000413439	AC006293.3	2.20783	1.14263	2.20783	up	Ensembl	2127	chr19	+	55219699	55224955	upstream	NM_001130917	LILRA2	leukocyte immunoglobulin-like receptor subfamily	-2.34144	-1.22739	2.34144	down	chr19	+	55085256	55099027
ENST00000413439	AC006293.3	2.20783	1.14263	2.20783	up	Ensembl	2127	chr19	+	55219699	55224955	upstream	NM_006863	LILRA1	leukocyte immunoglobulin-like receptor subfamily	-2.52547	-1.33655	2.52547	down	chr19	+	55105112	55112540
ENST00000413439	AC006293.3	2.20783	1.14263	2.20783	up	Ensembl	2127	chr19	+	55219699	55224955	downstream	NM_001080770	KIR2DL4	killer cell immunoglobulin-like receptor 2DL4	3.30795	1.72594	3.30795	up	chr19	+	55315066	55325972
uc004eqv.2	AK057519	-2.14129	-1.09848	2.14129	down	UCSC_knowngene	2146	chrX	+	117973518	117991706	upstream	NM_173798	ZCCHC12	zinc finger CCHC domain-containing protein 12	-2.79175	-1.48117	2.79175	down	chrX	+	117957786	117960931
ENST00000434081	NCRNA00163	-2.43811	-1.28576	2.43811	down	Ensembl	2155	chr21	-	46409778	46414001	downstream	NM_144991	TSPEAR	protein TSPEAR precursor	2.83664	1.50419	2.83664	up	chr21	-	45917774	46131495
uc003gcl.1	AX747945	-2.04916	-1.03504	2.04916	down	UCSC_knowngene	2165	chr4	+	1145159	1147489	upstream	NM_001004356	FGFRL1	fibroblast growth factor receptor-like 1	6.43438	2.6858	6.43438	up	chr4	+	1005609	1020686
uc003gcl.1	AX747945	-2.04916	-1.03504	2.04916	down	UCSC_knowngene	2165	chr4	+	1145159	1147489	upstream	NM_001004358	FGFRL1	fibroblast growth factor receptor-like 1	4.182	2.06419	4.182	up	chr4	+	1005759	1020686
uc003gcl.1	AX747945	-2.04916	-1.03504	2.04916	down	UCSC_knowngene	2165	chr4	+	1145159	1147489	downstream	NM_001012614	CTBP1	C-terminal-binding protein 1 isoform 2	9.22282	3.20521	9.22282	up	chr4	-	1205227	1242908
uc003gcl.1	AX747945	-2.04916	-1.03504	2.04916	down	UCSC_knowngene	2165	chr4	+	1145159	1147489	downstream	NM_001328	CTBP1	C-terminal-binding protein 1 isoform 1	-2.56519	-1.35907	2.56519	down	chr4	-	1205227	1242908
uc003gcl.1	AX747945	-2.04916	-1.03504	2.04916	down	UCSC_knowngene	2165	chr4	+	1145159	1147489	downstream	NM_001017405	MAEA	macrophage erythroblast attacher isoform 1	3.12159	1.64228	3.12159	up	chr4	+	1283671	1333925
NR_033370	LOC63930	-3.16825	-1.66369	3.16825	down	RefSeq_NR	3366	chr20	+	61640734	61716423	upstream	NM_022082	SLC17A9	solute carrier family 17 member 9	-6.3891	-2.67561	6.3891	down	chr20	+	61583998	61599949
uc002rby.2	BC035112	3.32183	1.73198	3.32183	up	UCSC_knowngene	3502	chr2	-	14368998	14541082	upstream	NM_145175	FAM84A	neurologic sensory protein 1	-8.1105	-3.01979	8.1105	down	chr2	+	14772809	14780168
ENST00000466530	RP3-477O4.15	-2.24846	-1.16894	2.24846	down	Ensembl	3965	chr20	+	34101395	34105360	downstream	NM_003116	SPAG4	sperm-associated antigen 4 protein	-11.6667	-3.54433	11.6667	down	chr20	+	34203808	34208965
ENST00000326734	FAM87B	5.84326	2.54677	5.84326	up	Ensembl	1944	chr1	+	752750	755214	downstream	NM_152486	SAMD11	sterile alpha motif domain-containing protein	-6.96959	-2.80107	6.96959	down	chr1	+	861120	879961
ENST00000326734	FAM87B	5.84326	2.54677	5.84326	up	Ensembl	1944	chr1	+	752750	755214	downstream	NM_021170	HES4	transcription factor HES-4 isoform 2	3.35234	1.74517	3.35234	up	chr1	-	934341	935552
ENST00000419300	RP11-492E3.1	-2.41827	-1.27398	2.41827	down	Ensembl	1959	chr9	+	132251378	132267360	downstream	NM_177999	ASB6	ankyrin repeat and SOCS box protein 6 isoform 2	2.31929	1.21368	2.31929	up	chr9	-	132396882	132404448
uc001yjz.1	AK094562	-3.4172	-1.77281	3.4172	down	UCSC_knowngene	2638	chr14	+	101536247	101539271	upstream	NM_001134888	RTL1	retrotransposon-like protein 1	-2.91568	-1.54383	2.91568	down	chr14	-	101346991	101351184
AB073661		2.23157	1.15806	2.23157	up	NRED	2686	chr22	+	31371385	31374065	downstream	NM_006932	SMTN	smoothelin isoform c	3.4737	1.79647	3.4737	up	chr22	+	31477304	31500609
AB073661		2.23157	1.15806	2.23157	up	NRED	2686	chr22	+	31371385	31374065	downstream	NM_134269	SMTN	smoothelin isoform b	4.18415	2.06493	4.18415	up	chr22	+	31477304	31500609
AB073661		2.23157	1.15806	2.23157	up	NRED	2686	chr22	+	31371385	31374065	downstream	NM_134270	SMTN	smoothelin isoform a	3.08903	1.62715	3.08903	up	chr22	+	31477304	31500609
AB073661		2.23157	1.15806	2.23157	up	NRED	2686	chr22	+	31371385	31374065	downstream	NM_005569	LIMK2	LIM domain kinase 2 isoform 2a	-2.10832	-1.0761	2.10832	down	chr22	+	31608249	31676066
ENST00000433673	AC068282.3	9.37023	3.22808	9.37023	up	Ensembl	2690	chr2	+	128146705	128158156	upstream	NM_001001665	CYP27C1	cytochrome P450 27C1	5.25026	2.39239	5.25026	up	chr2	-	127941411	127963343
ENST00000458492	AC005224.2	2.46253	1.30014	2.46253	up	Ensembl	1537	chr17	+	14113804	14121239	upstream	NM_001303	COX10	protoheme IX farnesyltransferase, mitochondrial	2.37862	1.25012	2.37862	up	chr17	+	13972718	14111996
uc002yyn.1	CR624487	-2.6039	-1.38067	2.6039	down	UCSC_knowngene	1542	chr21	+	41099681	41102607	upstream	NM_033171	B3GALT5	beta-1,3-galactosyltransferase 5	-4.72158	-2.23927	4.72158	down	chr21	+	41029253	41034815
uc002yyn.1	CR624487	-2.6039	-1.38067	2.6039	down	UCSC_knowngene	1542	chr21	+	41099681	41102607	downstream	NM_006198	PCP4	Purkinje cell protein 4	-2.02484	-1.01781	2.02484	down	chr21	+	41239346	41301322
NR_027085	LOC284551	-3.38973	-1.76117	3.38973	down	RefSeq_NR	2741	chr1	+	31984035	31989846	upstream	NM_178865	SERINC2	serine incorporator 2 isoform 1	-3.38913	-1.76091	3.38913	down	chr1	+	31885962	31907527
NR_027085	LOC284551	-3.38973	-1.76117	3.38973	down	RefSeq_NR	2741	chr1	+	31984035	31989846	downstream	NM_144569	SPOCD1	SPOC domain-containing protein 1	8.32171	3.05688	8.32171	up	chr1	-	32256024	32281580
NR_026883	HSPC072	5.96917	2.57753	5.96917	up	RefSeq_NR	1574	chr20	-	18768614	18775228	downstream	NM_001172746	SEC23B	protein transport protein Sec23B isoform 2	2.11157	1.07832	2.11157	up	chr20	+	18488209	18542059
uc002the.2	LOC541471	2.03588	1.02565	2.03588	up	UCSC_knowngene	1583	chr2	-	111965358	112252692	downstream	NM_207002	BCL2L11	bcl-2-like protein 11 isoform 9	7.00931	2.80927	7.00931	up	chr2	+	111878490	111886423
uc002goc.1	AK123263	-5.72559	-2.51743	5.72559	down	UCSC_knowngene	2800	chr17	-	13680148	13695867	upstream	NM_001303	COX10	protoheme IX farnesyltransferase, mitochondrial	2.37862	1.25012	2.37862	up	chr17	+	13972718	14111996
NR_027036	LOC100271722	-2.54943	-1.35018	2.54943	down	RefSeq_NR	1625	chr22	-	46435788	46440748	downstream	NM_013236	ATXN10	ataxin-10 isoform 1	2.28406	1.1916	2.28406	up	chr22	+	46067677	46241187
NR_027036	LOC100271722	-2.54943	-1.35018	2.54943	down	RefSeq_NR	1625	chr22	-	46435788	46440748	upstream	NM_016426	GTSE1	G2 and S phase-expressed protein 1	2.69531	1.43045	2.69531	up	chr22	+	46692637	46726707
NR_027036	LOC100271722	-2.54943	-1.35018	2.54943	down	RefSeq_NR	1625	chr22	-	46435788	46440748	upstream	NM_018006	TRMU	mitochondrial tRNA-specific 2-thiouridylase 1	3.24379	1.69768	3.24379	up	chr22	+	46731297	46753237
uc001jef.2	LOC643650	8.27207	3.04825	8.27207	up	UCSC_knowngene	2876	chr10	-	47096454	47151400	downstream	NM_014696	GPRIN2	G protein-regulated inducer of neurite outgrowth	-27.0347	-4.75674	27.0347	down	chr10	+	46993545	47000568
ENST00000423323	AC015842.1	-6.1296	-2.61579	6.1296	down	Ensembl	2998	chr17	-	13679950	13695867	upstream	NM_001303	COX10	protoheme IX farnesyltransferase, mitochondrial	2.37862	1.25012	2.37862	up	chr17	+	13972718	14111996
ENST00000446811	RP11-503C24.4	-5.61629	-2.48962	5.61629	down	Ensembl	2246	chr6	+	168643617	168663261	upstream	NM_030615	KIF25	kinesin-like protein KIF25 isoform 1	-2.7343	-1.45117	2.7343	down	chr6	+	168418552	168445769
uc001guz.2	EF413001	12.3059	3.62127	12.3059	up	UCSC_knowngene	2280	chr1	-	198867622	198906558	downstream	NM_002838	PTPRC	receptor-type tyrosine-protein phosphatase C	-3.81533	-1.93181	3.81533	down	chr1	+	198608136	198726545
uc001czt.1	AK097193	-2.2423	-1.16498	2.2423	down	UCSC_knowngene	2344	chr1	-	61125302	61291256	upstream	NM_001134673	NFIA	nuclear factor 1 A-type isoform 1	-2.17537	-1.12126	2.17537	down	chr1	+	61547979	61928460
ENST00000366181	RP11-296A18.3	2.27203	1.18398	2.27203	up	Ensembl	2366	chr1	-	51660766	51700768	downstream	NM_078626	CDKN2C	cyclin-dependent kinase 4 inhibitor C	2.16419	1.11383	2.16419	up	chr1	+	51435641	51440309
uc002wrm.1	BC090059	-2.30553	-1.2051	2.30553	down	UCSC_knowngene	1294	chr20	+	19780217	19790937	upstream	NM_020689	SLC24A3	sodium/potassium/calcium exchanger 3 precursor	-3.03006	-1.59935	3.03006	down	chr20	+	19193289	19703541
uc002wrm.1	BC090059	-2.30553	-1.2051	2.30553	down	UCSC_knowngene	1294	chr20	+	19780217	19790937	downstream	NM_015585	C20orf26	hypothetical protein LOC26074 isoform 1	-7.724	-2.94935	7.724	down	chr20	+	20033157	20341346
uc003pvl.1	CR598940	3.81665	1.93231	3.81665	up	UCSC_knowngene	1339	chr6	-	112221561	112230600	upstream	NM_001105206	LAMA4	laminin subunit alpha-4 isoform 1 precursor	2.05735	1.04079	2.05735	up	chr6	-	112429133	112575828
uc003ojj.2	CR624291	-2.01441	-1.01036	2.01441	down	UCSC_knowngene	2513	chr6	-	34247456	34249969	downstream	NM_145902	HMGA1	high mobility group protein HMG-I/HMG-Y isoform	3.94472	1.97992	3.94472	up	chr6	+	34204649	34214008
ENST00000417705	RP11-54O7.3	-21.9406	-4.45553	21.9406	down	Ensembl	1389	chr1	-	852249	855072	upstream	NM_005101	ISG15	ubiquitin-like protein ISG15 precursor	6.79802	2.76511	6.79802	up	chr1	+	948846	949919
ENST00000417705	RP11-54O7.3	-21.9406	-4.45553	21.9406	down	Ensembl	1389	chr1	-	852249	855072	upstream	NM_001130045	TTLL10	inactive polyglycylase TTLL10 isoform 1	-8.08869	-3.01591	8.08869	down	chr1	+	1109285	1133313
ENST00000417705	RP11-54O7.3	-21.9406	-4.45553	21.9406	down	Ensembl	1389	chr1	-	852249	855072	upstream	NM_153254	TTLL10	inactive polyglycylase TTLL10 isoform 2	-4.73587	-2.24363	4.73587	down	chr1	+	1115076	1121243
uc002ubt.1	AK027541	-10.3775	-3.37538	10.3775	down	UCSC_knowngene	2013	chr2	+	162101249	162105241	upstream	NM_004180	TANK	TRAF family member-associated NF-kappa-B	2.20981	1.14392	2.20981	up	chr2	+	161993465	162092682
uc002qgt.1	BC131616	-4.17945	-2.06331	4.17945	down	UCSC_knowngene	2014	chr19	+	55219699	55224842	downstream	NM_001080772	KIR2DL4	killer cell immunoglobulin-like receptor 2DL4	-2.08033	-1.05681	2.08033	down	chr19	+	55315066	55325972
uc002qgt.1	BC131616	-4.17945	-2.06331	4.17945	down	UCSC_knowngene	2014	chr19	+	55219699	55224842	downstream	NM_133277	FCAR	immunoglobulin alpha Fc receptor isoform g	3.29984	1.7224	3.29984	up	chr19	+	55385548	55401839
uc002qgt.1	BC131616	-4.17945	-2.06331	4.17945	down	UCSC_knowngene	2014	chr19	+	55219699	55224842	downstream	NM_001145458	NCR1	natural cytotoxicity triggering receptor 1	2.59513	1.37581	2.59513	up	chr19	+	55417507	55424439
uc004aiu.1	AK095210	-2.06137	-1.0436	2.06137	down	UCSC_knowngene	2078	chr9	+	74920351	74958126	downstream	NM_001102420	ZFAND5	AN1-type zinc finger protein 5	2.94415	1.55785	2.94415	up	chr9	-	74966340	74980163
uc004aiu.1	AK095210	-2.06137	-1.0436	2.06137	down	UCSC_knowngene	2078	chr9	+	74920351	74958126	downstream	NM_001102421	ZFAND5	AN1-type zinc finger protein 5	3.36341	1.74992	3.36341	up	chr9	-	74966340	74980163
NR_026951	C17orf44	-2.02643	-1.01894	2.02643	down	RefSeq_NR	2115	chr17	-	8123948	8127361	downstream	NM_001037144	CNTROB	centrobin isoform beta	2.45583	1.29621	2.45583	up	chr17	+	7835472	7852896
NR_026951	C17orf44	-2.02643	-1.01894	2.02643	down	RefSeq_NR	2115	chr17	-	8123948	8127361	upstream	NM_201520	SLC25A35	solute carrier family 25 member 35	-3.23803	-1.69512	3.23803	down	chr17	-	8191081	8198170
NR_026951	C17orf44	-2.02643	-1.01894	2.02643	down	RefSeq_NR	2115	chr17	-	8123948	8127361	upstream	NM_016492	RANGRF	ran guanine nucleotide release factor isoform A	-2.48806	-1.31502	2.48806	down	chr17	+	8191968	8193409
ENST00000423943	RP11-48O20.4	-8.6642	-3.11507	8.6642	down	Ensembl	1113	chr1	+	159931013	159948851	upstream	NM_001135050	IGSF9	protein turtle homolog A isoform a	-2.88593	-1.52903	2.88593	down	chr1	-	159896828	159915386
NR_026951	C17orf44	-2.02643	-1.01894	2.02643	down	RefSeq_NR	2115	chr17	-	8123948	8127361	upstream	NM_030808	NDEL1	nuclear distribution protein nudE-like 1 isoform	-15.6047	-3.96391	15.6047	down	chr17	+	8339178	8371481
ENST00000381105	RP11-706O15.7	2.06425	1.04562	2.06425	up	Ensembl	2118	chrX	-	3847909	3855896	downstream	NM_005044	PRKX	serine/threonine-protein kinase PRKX	2.41357	1.27117	2.41357	up	chrX	-	3522383	3631675
ENST00000413439	AC006293.3	2.20783	1.14263	2.20783	up	Ensembl	2127	chr19	+	55219699	55224955	downstream	NM_013289	KIR3DL1	killer cell immunoglobulin-like receptor 3DL1	-2.64762	-1.4047	2.64762	down	chr19	+	55327892	55342233
uc002qym.1	AK124409	3.6614	1.87239	3.6614	up	UCSC_knowngene	2130	chr2	-	6869300	6910442	upstream	NM_080657	RSAD2	radical S-adenosyl methionine domain-containing	15.9637	3.99672	15.9637	up	chr2	+	7017795	7038363
NR_026821	FAM138B	-2.24183	-1.16468	2.24183	down	RefSeq_NR	1130	chr2	+	114334958	114336428	downstream	NM_007082	RABL2A	rab-like protein 2A	-2.6792	-1.4218	2.6792	down	chr2	+	114384816	114400975
NR_026821	FAM138B	-2.24183	-1.16468	2.24183	down	RefSeq_NR	1130	chr2	+	114334958	114336428	downstream	NM_025181	SLC35F5	solute carrier family 35 member F5	2.03618	1.02587	2.03618	up	chr2	-	114471932	114514400
uc001kat.2	CR592318	-2.6581	-1.4104	2.6581	down	UCSC_knowngene	1146	chr10	-	81451255	81586183	downstream	NM_001099692	EIF5AL1	eukaryotic translation initiation factor	3.2301	1.69158	3.2301	up	chr10	+	81272356	81276192
ENST00000452153	AC115989.1	-2.24013	-1.16358	2.24013	down	Ensembl	1150	chr17	+	19532763	19537138	upstream	NM_007148	RNF112	RING finger protein 112	-5.53362	-2.46822	5.53362	down	chr17	+	19314490	19320589
ENST00000452153	AC115989.1	-2.24013	-1.16358	2.24013	down	Ensembl	1150	chr17	+	19532763	19537138	downstream	NM_000382	ALDH3A2	fatty aldehyde dehydrogenase isoform 2	-2.26825	-1.18158	2.26825	down	chr17	+	19552063	19580908
uc002rbr.2	CR593993	-3.05274	-1.61011	3.05274	down	UCSC_knowngene	1168	chr2	+	11821585	11823451	downstream	NM_145693	LPIN1	phosphatidate phosphatase LPIN1	7.0866	2.82509	7.0866	up	chr2	+	11886739	11967533
ENST00000447557	RP1-287H17.1	-2.36477	-1.2417	2.36477	down	Ensembl	929	chr6	-	135027197	135028487	upstream	NM_001145158	HBS1L	HBS1-like protein isoform 2	2.77242	1.47114	2.77242	up	chr6	-	135281516	135376036
ENST00000447571	AC079807.4	13.0444	3.70536	13.0444	up	Ensembl	1808	chr2	-	48168834	48468122	upstream	NM_001135629	KLRAQ1	KLRAQ motif-containing protein 1 isoform 1	3.98529	1.99469	3.98529	up	chr2	+	48667907	48742531
ENST00000379053	RP5-1022P6.6	-4.68322	-2.2275	4.68322	down	Ensembl	1857	chr20	-	5480968	5485259	upstream	NM_152504	C20orf196	hypothetical protein LOC149840	-3.48791	-1.80236	3.48791	down	chr20	+	5731042	5844559
BC042185		3.48512	1.80121	3.48512	up	RNAdb	964	chr9	+	35646266	35647470	upstream	NM_001782	CD72	B-cell differentiation antigen CD72	-2.21322	-1.14615	2.21322	down	chr9	-	35609975	35618424
BC042185		3.48512	1.80121	3.48512	up	RNAdb	964	chr9	+	35646266	35647470	downstream	NM_032818	C9orf100	vav-like protein C9orf100	3.07955	1.62272	3.07955	up	chr9	-	35659340	35665278
ENST00000457725	AP003774.6	-3.37642	-1.75549	3.37642	down	Ensembl	985	chr11	-	64161813	64163303	downstream	NM_057092	FKBP2	peptidyl-prolyl cis-trans isomerase FKBP2	-4.71356	-2.23682	4.71356	down	chr11	+	64009587	64011607
ENST00000457725	AP003774.6	-3.37642	-1.75549	3.37642	down	Ensembl	985	chr11	-	64161813	64163303	downstream	NM_020155	GPR137	integral membrane protein GPR137 isoform 3	2.2285	1.15607	2.2285	up	chr11	+	64053581	64056972
ENST00000457725	AP003774.6	-3.37642	-1.75549	3.37642	down	Ensembl	985	chr11	-	64161813	64163303	downstream	NM_032251	CCDC88B	coiled-coil domain-containing protein 88B	-6.60442	-2.72343	6.60442	down	chr11	+	64107689	64125006
uc003qdd.2	AF086187	-2.56936	-1.36141	2.56936	down	UCSC_knowngene	990	chr6	+	132455117	132490502	upstream	NM_006208	ENPP1	ectonucleotide pyrophosphatase/phosphodiesterase	-3.22021	-1.68716	3.22021	down	chr6	+	132129155	132216295
NR_026762	C10orf75	2.19234	1.13247	2.19234	up	RefSeq_NR	1003	chr10	+	102133332	102148110	downstream	NM_017902	HIF1AN	hypoxia-inducible factor 1-alpha inhibitor	2.11824	1.08286	2.11824	up	chr10	+	102295640	102313681
NR_015410	FLJ22536	4.72581	2.24056	4.72581	up	RefSeq_NR	1904	chr6	+	21666674	22194614	upstream	NM_003107	SOX4	transcription factor SOX-4	4.25669	2.08973	4.25669	up	chr6	+	21593971	21598849
ENST00000326734	FAM87B	5.84326	2.54677	5.84326	up	Ensembl	1944	chr1	+	752750	755214	downstream	NM_005101	ISG15	ubiquitin-like protein ISG15 precursor	6.79802	2.76511	6.79802	up	chr1	+	948846	949919
ENST00000510784	AL160400.1	-2.66038	-1.41163	2.66038	down	Ensembl	1029	chr6	-	25015180	25042398	downstream	NM_014722	FAM65B	family with sequence similarity 65, member B	-5.96256	-2.57593	5.96256	down	chr6	-	24804512	24911195
AK055023		-2.00937	-1.00674	2.00937	down	misc_RNA	1974	chr10	-	72689681	72695453	downstream	NM_003901	SGPL1	sphingosine-1-phosphate lyase 1	2.47246	1.30594	2.47246	up	chr10	+	72575703	72640932
NR_027341	C9orf44	-2.39409	-1.25948	2.39409	down	RefSeq_NR	2000	chr9	+	94903748	94921890	upstream	NM_006415	SPTLC1	serine palmitoyltransferase 1 isoform a	2.06473	1.04595	2.06473	up	chr9	-	94793426	94877690
NR_027341	C9orf44	-2.39409	-1.25948	2.39409	down	RefSeq_NR	2000	chr9	+	94903748	94921890	downstream	NM_013417	IARS	isoleucyl-tRNA synthetase, cytoplasmic	2.42743	1.27943	2.42743	up	chr9	-	94972624	95055972
ENST00000417705	RP11-54O7.3	-21.9406	-4.45553	21.9406	down	Ensembl	1389	chr1	-	852249	855072	upstream	NM_021170	HES4	transcription factor HES-4 isoform 2	3.35234	1.74517	3.35234	up	chr1	-	934341	935552
NR_002724	MBL1P	-2.23098	-1.15768	2.23098	down	RefSeq_NR	1424	chr10	+	81679933	81682875	downstream	NM_025125	C10orf57	transmembrane protein C10orf57	-2.06081	-1.04321	2.06081	down	chr10	+	81838425	81852307
ENST00000453790	RP11-79N23.1	-2.03898	-1.02785	2.03898	down	Ensembl	850	chr6	-	53605546	53611820	downstream	NM_001498	GCLC	glutamate--cysteine ligase catalytic subunit	2.02301	1.0165	2.02301	up	chr6	-	53362139	53409927
ENST00000415195	XXbac-BPG249D20.9	-2.9251	-1.54849	2.9251	down	Ensembl	851	chr6	+	30484042	30486994	downstream	NM_001025091	ABCF1	ATP-binding cassette sub-family F member 1	3.61285	1.85314	3.61285	up	chr6	+	30539169	30559309
ENST00000415195	XXbac-BPG249D20.9	-2.9251	-1.54849	2.9251	down	Ensembl	851	chr6	+	30484042	30486994	downstream	NM_002714	PPP1R10	serine/threonine-protein phosphatase 1	14.3692	3.84491	14.3692	up	chr6	-	30568181	30585020
AK058075		-3.57005	-1.83594	3.57005	down	misc_RNA	1555	chr22	-	50226263	50231434	upstream	NM_001164104	MOV10L1	putative helicase Mov10l1 isoform 2	-2.22138	-1.15146	2.22138	down	chr22	+	50528434	50600116
NR_026883	HSPC072	5.96917	2.57753	5.96917	up	RefSeq_NR	1574	chr20	-	18768614	18775228	downstream	NM_032986	SEC23B	protein transport protein Sec23B isoform 1	3.94511	1.98007	3.94511	up	chr20	+	18488187	18542050
uc002the.2	LOC541471	2.03588	1.02565	2.03588	up	UCSC_knowngene	1583	chr2	-	111965358	112252692	downstream	NM_006538	BCL2L11	bcl-2-like protein 11 isoform 6	2.07529	1.05331	2.07529	up	chr2	+	111878490	111926022
uc002the.2	LOC541471	2.03588	1.02565	2.03588	up	UCSC_knowngene	1583	chr2	-	111965358	112252692	downstream	NM_138621	BCL2L11	bcl-2-like protein 11 isoform 1	-2.04675	-1.03334	2.04675	down	chr2	+	111878490	111926022
ENST00000433357	RP11-255A11.21	-8.49192	-3.08609	8.49192	down	Ensembl	902	chr9	+	33602498	33605291	downstream	NM_002771	PRSS3	trypsin-3 isoform 2 preproprotein	-2.59468	-1.37556	2.59468	down	chr9	+	33795558	33799229
ENST00000449713	AP001065.15	-2.64903	-1.40546	2.64903	down	Ensembl	912	chr21	+	45905459	45910171	downstream	NM_144991	TSPEAR	protein TSPEAR precursor	2.83664	1.50419	2.83664	up	chr21	-	45917774	46131495
ENST00000449713	AP001065.15	-2.64903	-1.40546	2.64903	down	Ensembl	912	chr21	+	45905459	45910171	downstream	NM_198693	KRTAP10-2	keratin-associated protein 10-2	-2.04976	-1.03546	2.04976	down	chr21	-	45970317	45971388
ENST00000449713	AP001065.15	-2.64903	-1.40546	2.64903	down	Ensembl	912	chr21	+	45905459	45910171	downstream	NM_198698	KRTAP12-4	keratin-associated protein 12-4	-2.23728	-1.16175	2.23728	down	chr21	-	46074129	46074576
uc001kat.2	CR592318	-2.6581	-1.4104	2.6581	down	UCSC_knowngene	1146	chr10	-	81451255	81586183	upstream	NM_025125	C10orf57	transmembrane protein C10orf57	-2.06081	-1.04321	2.06081	down	chr10	+	81838425	81852307
ENST00000453174	MBL1P1	2.42663	1.27895	2.42663	up	Ensembl	818	chr10	+	81664653	81691557	downstream	NM_025125	C10orf57	transmembrane protein C10orf57	-2.06081	-1.04321	2.06081	down	chr10	+	81838425	81852307
ENST00000425586	DLEU2	-2.22258	-1.15223	2.22258	down	Ensembl	1267	chr13	-	50601268	50699856	downstream	NM_173605	KCNRG	putative potassium channel regulatory protein	-103.005	-6.68657	103.005	down	chr13	+	50589389	50595058
uc002rzk.2	BC043355	-2.11521	-1.0808	2.11521	down	UCSC_knowngene	1275	chr2	+	56179292	56408787	upstream	NM_033109	PNPT1	polyribonucleotide nucleotidyltransferase 1,	10.531	3.39657	10.531	up	chr2	-	55861197	55921011
uc002wrm.1	BC090059	-2.30553	-1.2051	2.30553	down	UCSC_knowngene	1294	chr20	+	19780217	19790937	downstream	NM_001167816	C20orf26	hypothetical protein LOC26074 isoform 2	2.75785	1.46355	2.75785	up	chr20	+	20037289	20152977
ENST00000426881	RP11-14O19.2	-6.41986	-2.68254	6.41986	down	Ensembl	1013	chr1	-	95821574	95846556	downstream	NM_152487	TMEM56	transmembrane protein 56	-20.25	-4.33985	20.25	down	chr1	+	95582893	95663161
ENST00000442214	AC104654.1	3.10518	1.63468	3.10518	up	Ensembl	741	chr2	+	42104695	42120186	downstream	NM_019063	EML4	echinoderm microtubule-associated protein-like 4	-2.62982	-1.39496	2.62982	down	chr2	+	42396489	42559688
ENST00000427974	RP1-56L9.7	-2.13173	-1.09203	2.13173	down	Ensembl	741	chr6	-	160060338	160061133	upstream	NM_173516	PNLDC1	poly(A)-specific ribonuclease PARN-like	-2.95208	-1.56173	2.95208	down	chr6	+	160221300	160241735
ENST00000468538	RP1-149M18.4	-3.06792	-1.61726	3.06792	down	Ensembl	743	chr6	+	41373556	41374299	upstream	NM_018643	TREM1	triggering receptor expressed on myeloid cells 1	26.1209	4.70713	26.1209	up	chr6	-	41243711	41254457
ENST00000510784	AL160400.1	-2.66038	-1.41163	2.66038	down	Ensembl	1029	chr6	-	25015180	25042398	downstream	NM_015895	GMNN	geminin	4.13683	2.04852	4.13683	up	chr6	+	24775163	24786278
ENST00000449954	AL078621.3	-7.89024	-2.98007	7.89024	down	Ensembl	745	chr2	+	114270039	114273062	downstream	NM_013412	RABL2A	rab-like protein 2A	-3.5553	-1.82997	3.5553	down	chr2	+	114384816	114400975
ENST00000437920	RP1-148H17.1	-4.65675	-2.21932	4.65675	down	Ensembl	750	chr20	-	46020672	46041071	downstream	NM_172110	EYA2	eyes absent homolog 2 isoform c	-2.14301	-1.09964	2.14301	down	chr20	+	45523262	45817492
ENST00000438217	XX-C2158C12.2	-2.3861	-1.25465	2.3861	down	Ensembl	758	chr6	+	171034284	171037576	upstream	NM_001172085	TBP	TATA-box-binding protein isoform 2	2.39929	1.26261	2.39929	up	chr6	+	170863420	170881958
ENST00000444079	AC093326.3	-3.89636	-1.96213	3.89636	down	Ensembl	762	chr2	+	558203	578145	upstream	NM_007099	ACP1	low molecular weight phosphotyrosine protein	3.41927	1.77369	3.41927	up	chr2	+	264868	278282
ENST00000452716	AC023115.3	4.91801	2.29808	4.91801	up	Ensembl	1074	chr2	+	67313577	67523207	downstream	NM_019002	ETAA1	ewing's tumor-associated antigen 1	3.56358	1.83333	3.56358	up	chr2	+	67624441	67637533
ENST00000417884	RP3-340N1.2	-2.00747	-1.00538	2.00747	down	Ensembl	1083	chr1	+	20480830	20487061	downstream	NM_152376	UBXN10	UBX domain-containing protein 10	-307.931	-8.26647	307.931	down	chr1	+	20512577	20519942
uc010gdi.2	LOC284798	-2.6872	-1.4261	2.6872	down	UCSC_knowngene	770	chr20	-	25123633	25129361	downstream	NM_003650	CST7	cystatin-F precursor	-2.5074	-1.32619	2.5074	down	chr20	+	24929865	24940564
uc010gdi.2	LOC284798	-2.6872	-1.4261	2.6872	down	UCSC_knowngene	770	chr20	-	25123633	25129361	upstream	NM_021067	GINS1	DNA replication complex GINS protein PSF1	14.7366	3.88133	14.7366	up	chr20	+	25388322	25429191
ENST00000412772	RP11-134P9.3	-2.8037	-1.48733	2.8037	down	Ensembl	775	chr1	+	203256279	203257929	downstream	NM_006763	BTG2	protein BTG2	-2.67468	-1.41937	2.67468	down	chr1	+	203274663	203278729
ENST00000420807	RP11-452J13.1	-4.37517	-2.12934	4.37517	down	Ensembl	779	chr1	+	193273874	193335083	upstream	NM_001173525	TROVE2	60 kDa SS-A/Ro ribonucleoprotein isoform 4	8.30729	3.05438	8.30729	up	chr1	+	193029003	193060906
ENST00000420807	RP11-452J13.1	-4.37517	-2.12934	4.37517	down	Ensembl	779	chr1	+	193273874	193335083	upstream	NM_024529	CDC73	parafibromin	4.72931	2.24163	4.72931	up	chr1	+	193091087	193223942
ENST00000423943	RP11-48O20.4	-8.6642	-3.11507	8.6642	down	Ensembl	1113	chr1	+	159931013	159948851	upstream	NM_001004310	FCRL6	Fc receptor-like protein 6 precursor	-9.5845	-3.2607	9.5845	down	chr1	+	159772172	159786047
ENST00000423943	RP11-48O20.4	-8.6642	-3.11507	8.6642	down	Ensembl	1113	chr1	+	159931013	159948851	upstream	NM_020789	IGSF9	protein turtle homolog A isoform b	-2.34824	-1.23158	2.34824	down	chr1	-	159896828	159915386
ENST00000423943	RP11-48O20.4	-8.6642	-3.11507	8.6642	down	Ensembl	1113	chr1	+	159931013	159948851	downstream	NM_000702	ATP1A2	sodium/potassium-transporting ATPase subunit	-18.5658	-4.21458	18.5658	down	chr1	+	160085519	160113374
ENST00000423943	RP11-48O20.4	-8.6642	-3.11507	8.6642	down	Ensembl	1113	chr1	+	159931013	159948851	downstream	NM_002857	PEX19	peroxisomal biogenesis factor 19 isoform a	5.49314	2.45763	5.49314	up	chr1	-	160246598	160254941
ENST00000438722	AC018737.3	-6.59232	-2.72079	6.59232	down	Ensembl	794	chr2	+	122548019	122554278	upstream	NM_004622	TSN	translin	3.07628	1.62119	3.07628	up	chr2	+	122513120	122525428
ENST00000455039	RP11-426A6.7	2.02038	1.01463	2.02038	up	Ensembl	795	chr9	+	138359933	138364095	downstream	NM_001048265	C9orf116	hypothetical protein LOC138162 isoform 1	-12.6808	-3.66457	12.6808	down	chr9	-	138387025	138391761
NR_026821	FAM138B	-2.24183	-1.16468	2.24183	down	RefSeq_NR	1130	chr2	+	114334958	114336428	downstream	NM_013412	RABL2A	rab-like protein 2A	-3.5553	-1.82997	3.5553	down	chr2	+	114384816	114400975
ENST00000449457	RP11-445P17.8	-4.99338	-2.32002	4.99338	down	Ensembl	692	chr10	-	5307995	5313199	downstream	NM_001818	AKR1C4	aldo-keto reductase family 1 member C4	-13.2661	-3.72968	13.2661	down	chr10	+	5238797	5260910
ENST00000449457	RP11-445P17.8	-4.99338	-2.32002	4.99338	down	Ensembl	692	chr10	-	5307995	5313199	upstream	NM_005863	NET1	neuroepithelial cell-transforming gene 1 protein	9.15117	3.19396	9.15117	up	chr10	+	5488545	5500426
uc001ker.1	BC082979	-2.00064	-1.00046	2.00064	down	UCSC_knowngene	888	chr10	+	89102678	89115182	upstream	NM_005271	GLUD1	glutamate dehydrogenase 1, mitochondrial	2.31384	1.21029	2.31384	up	chr10	-	88809958	88854776
ENST00000449713	AP001065.15	-2.64903	-1.40546	2.64903	down	Ensembl	912	chr21	+	45905459	45910171	upstream	NM_004928	C21orf2	hypothetical protein LOC755	-2.80237	-1.48665	2.80237	down	chr21	-	45748826	45759285
ENST00000411780	RP11-425M5.5	-3.3463	-1.74257	3.3463	down	Ensembl	714	chr20	-	36120873	36137633	downstream	NM_001003897	MANBAL	protein MANBAL	3.97783	1.99198	3.97783	up	chr20	+	35918050	35945663
ENST00000414398	HCG24	-3.70981	-1.89134	3.70981	down	Ensembl	717	chr6	+	33112559	33115544	downstream	NM_022553	VPS52	vacuolar protein sorting-associated protein 52	2.30428	1.20431	2.30428	up	chr6	-	33218048	33239662
ENST00000414398	HCG24	-3.70981	-1.89134	3.70981	down	Ensembl	717	chr6	+	33112559	33115544	downstream	NM_003782	B3GALT4	beta-1,3-galactosyltransferase 4	-3.58758	-1.84301	3.58758	down	chr6	+	33244916	33246602
ENST00000414398	HCG24	-3.70981	-1.89134	3.70981	down	Ensembl	717	chr6	+	33112559	33115544	downstream	NM_005452	WDR46	WD repeat-containing protein 46 isoform 1	2.46463	1.30137	2.46463	up	chr6	-	33246879	33257304
ENST00000447557	RP1-287H17.1	-2.36477	-1.2417	2.36477	down	Ensembl	929	chr6	-	135027197	135028487	upstream	NM_006620	HBS1L	HBS1-like protein isoform 1	2.86545	1.51876	2.86545	up	chr6	-	135281516	135376036
ENST00000450860	RP5-1091N2.9	-4.24962	-2.08733	4.24962	down	Ensembl	726	chrX	-	70403408	70418025	upstream	NM_001171163	ZMYM3	zinc finger MYM-type protein 3 isoform 3	2.23939	1.16311	2.23939	up	chrX	-	70469054	70474499
BC042185		3.48512	1.80121	3.48512	up	RNAdb	964	chr9	+	35646266	35647470	upstream	NM_014806	RUSC2	iporin	-2.08707	-1.06148	2.08707	down	chr9	+	35490006	35561895
BC042185		3.48512	1.80121	3.48512	up	RNAdb	964	chr9	+	35646266	35647470	upstream	NM_001164310	FAM166B	hypothetical protein LOC730112 isoform 1	-3.44776	-1.78566	3.44776	down	chr9	-	35561944	35563896
BC042185		3.48512	1.80121	3.48512	up	RNAdb	964	chr9	+	35646266	35647470	downstream	NM_213674	TPM2	tropomyosin beta chain isoform 2	3.55205	1.82865	3.55205	up	chr9	-	35681989	35690053
BC042185		3.48512	1.80121	3.48512	up	RNAdb	964	chr9	+	35646266	35647470	downstream	NM_006289	TLN1	talin-1	2.78848	1.47948	2.78848	up	chr9	-	35697333	35732392
ENST00000457725	AP003774.6	-3.37642	-1.75549	3.37642	down	Ensembl	985	chr11	-	64161813	64163303	downstream	NM_031471	FERMT3	fermitin family homolog 3 short form	-2.73366	-1.45083	2.73366	down	chr11	+	63974151	63991363
ENST00000457725	AP003774.6	-3.37642	-1.75549	3.37642	down	Ensembl	985	chr11	-	64161813	64163303	downstream	NM_003377	VEGFB	vascular endothelial growth factor B precursor	-2.01731	-1.01244	2.01731	down	chr11	+	64002265	64006259
ENST00000457725	AP003774.6	-3.37642	-1.75549	3.37642	down	Ensembl	985	chr11	-	64161813	64163303	downstream	NM_001177358	GPR137	integral membrane protein GPR137 isoform 5	3.63399	1.86155	3.63399	up	chr11	+	64052282	64056972
ENST00000457725	AP003774.6	-3.37642	-1.75549	3.37642	down	Ensembl	985	chr11	-	64161813	64163303	downstream	NM_001170880	GPR137	integral membrane protein GPR137 isoform 2	2.27203	1.18398	2.27203	up	chr11	+	64053581	64056972
ENST00000457725	AP003774.6	-3.37642	-1.75549	3.37642	down	Ensembl	985	chr11	-	64161813	64163303	upstream	NM_153378	SLC22A12	solute carrier family 22 member 12 isoform b	-3.73248	-1.90013	3.73248	down	chr11	+	64358281	64369820
ENST00000425666	RP11-389K14.3	2.18453	1.12732	2.18453	up	Ensembl	1013	chr9	-	93063183	93195771	upstream	NM_017594	DIRAS2	GTP-binding protein Di-Ras2	-2.0529	-1.03766	2.0529	down	chr9	-	93372113	93405108
ENST00000441790	RP11-392O17.1	-2.11424	-1.08014	2.11424	down	Ensembl	811	chr1	-	219583022	219585283	downstream	NM_138794	LYPLAL1	lysophospholipase-like protein 1	2.68045	1.42248	2.68045	up	chr1	+	219347191	219386207
ENST00000453174	MBL1P1	2.42663	1.27895	2.42663	up	Ensembl	818	chr10	+	81664653	81691557	upstream	NM_001164645	SFTPA1	pulmonary surfactant-associated protein A1	-2.35826	-1.23772	2.35826	down	chr10	+	81370694	81375199
ENST00000444374	RP11-316P17.2	2.37803	1.24977	2.37803	up	Ensembl	822	chr9	+	92316565	92334585	upstream	NM_006378	SEMA4D	semaphorin-4D isoform 1	-3.31772	-1.73019	3.31772	down	chr9	-	91992151	92094611
ENST00000431157	RP11-354E11.2	-28.714	-4.84368	28.714	down	Ensembl	823	chr10	-	20010625	20017479	upstream	NM_032812	PLXDC2	plexin domain-containing protein 2 precursor	2.60187	1.37955	2.60187	up	chr10	+	20105371	20569115
ENST00000413945	C6orf155	2.26329	1.17842	2.26329	up	Ensembl	662	chr6	-	72054046	72129806	downstream	NM_024576	OGFRL1	opioid growth factor receptor-like protein 1	4.55371	2.18704	4.55371	up	chr6	+	71998476	72011973
ENST00000445963	RP11-395E19.7	-138.973	-7.11866	138.973	down	Ensembl	847	chr9	-	40740775	40742447	upstream	NM_033160	ZNF658	zinc finger protein 658	2.0021	1.00151	2.0021	up	chr9	-	40771401	40792112
ENST00000450216	CTA-150C2.13	-2.47547	-1.3077	2.47547	down	Ensembl	678	chr22	+	39317231	39320713	upstream	NM_020243	TOMM22	mitochondrial import receptor subunit TOM22	3.42965	1.77806	3.42965	up	chr22	+	39077953	39080766
ENST00000458683	RP11-108M21.1	-2.20834	-1.14297	2.20834	down	Ensembl	858	chr1	+	187061973	187329455	upstream	NM_024420	PLA2G4A	cytosolic phospholipase A2	3.36164	1.74917	3.36164	up	chr1	+	186798031	186958113
uc003qod.2	BC031960	-3.41912	-1.77362	3.41912	down	UCSC_knowngene	883	chr6	-	151517809	151549592	upstream	NM_025059	C6orf97	hypothetical protein LOC80129	-5.90604	-2.56219	5.90604	down	chr6	+	151815174	151942328
ENST00000448058	RP11-17H4.2	-8.4579	-3.0803	8.4579	down	Ensembl	597	chr1	-	231727037	231747836	downstream	NM_022051	EGLN1	egl nine homolog 1	3.59923	1.84769	3.59923	up	chr1	-	231499496	231560790
ENST00000422405	RP11-318G21.3	-3.3762	-1.7554	3.3762	down	Ensembl	601	chr13	+	78402356	78408085	upstream	NM_001160706	SCEL	sciellin isoform 3	-16.8853	-4.07769	16.8853	down	chr13	+	78109808	78219398
ENST00000423797	AC006038.4	-2.05357	-1.03813	2.05357	down	Ensembl	603	chr2	-	42592809	42652228	downstream	NM_001145076	EML4	echinoderm microtubule-associated protein-like 4	3.70313	1.88875	3.70313	up	chr2	+	42396489	42559688
ENST00000423797	AC006038.4	-2.05357	-1.03813	2.05357	down	Ensembl	603	chr2	-	42592809	42652228	downstream	NM_019063	EML4	echinoderm microtubule-associated protein-like 4	-2.62982	-1.39496	2.62982	down	chr2	+	42396489	42559688
ENST00000423797	AC006038.4	-2.05357	-1.03813	2.05357	down	Ensembl	603	chr2	-	42592809	42652228	upstream	NM_020744	MTA3	metastasis-associated protein MTA3	2.08915	1.06292	2.08915	up	chr2	+	42795670	42936353
ENST00000447453	AC078941.1	-2.64715	-1.40444	2.64715	down	Ensembl	750	chr2	-	67351801	67405124	upstream	NM_019002	ETAA1	ewing's tumor-associated antigen 1	3.56358	1.83333	3.56358	up	chr2	+	67624441	67637533
ENST00000412772	RP11-134P9.3	-2.8037	-1.48733	2.8037	down	Ensembl	775	chr1	+	203256279	203257929	upstream	NM_000674	ADORA1	adenosine receptor A1	-25.7304	-4.6854	25.7304	down	chr1	+	203096835	203136533
ENST00000412772	RP11-134P9.3	-2.8037	-1.48733	2.8037	down	Ensembl	775	chr1	+	203256279	203257929	upstream	NM_001276	CHI3L1	chitinase-3-like protein 1 precursor	19.7722	4.3054	19.7722	up	chr1	-	203148058	203155922
ENST00000425246	RP11-336A10.5	-2.10345	-1.07275	2.10345	down	Ensembl	613	chr10	-	5650437	5652756	downstream	NM_005863	NET1	neuroepithelial cell-transforming gene 1 protein	9.15117	3.19396	9.15117	up	chr10	+	5488545	5500426
ENST00000455966	RP1-224A6.3	-2.80728	-1.48917	2.80728	down	Ensembl	615	chr1	-	22350486	22351461	upstream	NM_044472	CDC42	cell division control protein 42 homolog isoform	-2.09063	-1.06394	2.09063	down	chr1	+	22379119	22417296
ENST00000420807	RP11-452J13.1	-4.37517	-2.12934	4.37517	down	Ensembl	779	chr1	+	193273874	193335083	upstream	NM_001042369	TROVE2	60 kDa SS-A/Ro ribonucleoprotein isoform 1	6.39688	2.67737	6.39688	up	chr1	+	193029003	193060906
ENST00000420807	RP11-452J13.1	-4.37517	-2.12934	4.37517	down	Ensembl	779	chr1	+	193273874	193335083	upstream	NM_001042370	TROVE2	60 kDa SS-A/Ro ribonucleoprotein isoform 3	2.89317	1.53265	2.89317	up	chr1	+	193029003	193060906
ENST00000427890	RP11-101P17.6	7.36761	2.8812	7.36761	up	Ensembl	621	chr13	+	21834167	21867568	upstream	NM_005870	SAP18	histone deacetylase complex subunit SAP18	-2.60125	-1.3792	2.60125	down	chr13	+	21714652	21723224
ENST00000427890	RP11-101P17.6	7.36761	2.8812	7.36761	up	Ensembl	621	chr13	+	21834167	21867568	upstream	NM_024026	MRP63	ribosomal protein 63, mitochondrial	-2.24988	-1.16985	2.24988	down	chr13	+	21750371	21753220
ENST00000412381	AC142119.1	6.15666	2.62215	6.15666	up	Ensembl	642	chr2	-	16225343	16245963	downstream	NM_005378	MYCN	N-myc proto-oncogene protein	-5.81252	-2.53917	5.81252	down	chr2	+	16080682	16087129
ENST00000451118	WI2-85898F10.1	-2.93585	-1.55378	2.93585	down	Ensembl	805	chr22	-	46271878	46283628	downstream	NM_001167621	ATXN10	ataxin-10 isoform 2	3.42901	1.77779	3.42901	up	chr22	+	46067677	46241187
ENST00000424837	AP000282.3	-2.26787	-1.18134	2.26787	down	Ensembl	576	chr21	+	34331195	34332874	downstream	NM_207584	IFNAR2	interferon alpha/beta receptor 2 isoform b	-2.87873	-1.52543	2.87873	down	chr21	+	34602230	34635062
ENST00000425089	RP11-524H19.2	2.99349	1.58183	2.99349	up	Ensembl	586	chr6	-	54704915	54705653	upstream	NM_001010872	FAM83B	hypothetical protein LOC222584	2.94182	1.55671	2.94182	up	chr6	+	54711568	54806819
ENST00000416685	AC079779.5	4.71159	2.23622	4.71159	up	Ensembl	590	chr2	-	306058	309379	downstream	NM_007099	ACP1	low molecular weight phosphotyrosine protein	3.41927	1.77369	3.41927	up	chr2	+	264868	278282
ENST00000452181	RP1-90G24.6	-2.81647	-1.49389	2.81647	down	Ensembl	590	chr22	+	32669406	32673173	upstream	NM_001159546	RFPL2	ret finger protein-like 2 isoform 3	-3.62298	-1.85718	3.62298	down	chr22	-	32586421	32598537
ENST00000452181	RP1-90G24.6	-2.81647	-1.49389	2.81647	down	Ensembl	590	chr22	+	32669406	32673173	downstream	NM_174932	BPIL2	bactericidal/permeability-increasing	-2.51801	-1.33228	2.51801	down	chr22	-	32809833	32853373
ENST00000411451	RP11-308N19.4	6.22778	2.63872	6.22778	up	Ensembl	690	chr9	+	109427030	109464943	downstream	NM_021224	ZNF462	zinc finger protein 462	2.23523	1.16042	2.23523	up	chr9	+	109625377	109773796
ENST00000449457	RP11-445P17.8	-4.99338	-2.32002	4.99338	down	Ensembl	692	chr10	-	5307995	5313199	downstream	NM_001353	AKR1C1	aldo-keto reductase family 1 member C1	-40.2075	-5.32939	40.2075	down	chr10	+	5005453	5020158
ENST00000449457	RP11-445P17.8	-4.99338	-2.32002	4.99338	down	Ensembl	692	chr10	-	5307995	5313199	downstream	NM_003739	AKR1C3	aldo-keto reductase family 1 member C3	-6.13749	-2.61765	6.13749	down	chr10	+	5136567	5149878
ENST00000451066	AC009473.1	-4.11819	-2.04201	4.11819	down	Ensembl	692	chr7	-	7989483	7990340	upstream	NM_138426	GLCCI1	glucocorticoid-induced transcript 1 protein	-3.5433	-1.82509	3.5433	down	chr7	+	8008422	8128709
ENST00000432530	RP11-258F22.1	-2.45877	-1.29794	2.45877	down	Ensembl	712	chr10	-	38064298	38073059	upstream	NM_021045	ZNF248	zinc finger protein 248	2.41126	1.26979	2.41126	up	chr10	-	38117898	38146486
ENST00000411780	RP11-425M5.5	-3.3463	-1.74257	3.3463	down	Ensembl	714	chr20	-	36120873	36137633	downstream	NM_001135771	RPN2	dolichyl-diphosphooligosaccharide--protein	3.07041	1.61843	3.07041	up	chr20	+	35807455	35870025
ENST00000451101	AC019172.2	-5.20791	-2.3807	5.20791	down	Ensembl	717	chr2	+	3891773	3895001	upstream	NM_018436	ALLC	probable allantoicase isoform a	-2.44065	-1.28726	2.44065	down	chr2	+	3705785	3750260
ENST00000414398	HCG24	-3.70981	-1.89134	3.70981	down	Ensembl	717	chr6	+	33112559	33115544	downstream	NM_014234	HSD17B8	estradiol 17-beta-dehydrogenase 8	-2.3307	-1.22076	2.3307	down	chr6	+	33172418	33174607
ENST00000438772	AC036222.1	2.37399	1.24731	2.37399	up	Ensembl	595	chr17	-	46710868	46724152	upstream	NM_001002027	ATP5G1	ATP synthase lipid-binding protein,	4.96769	2.31258	4.96769	up	chr17	+	46970147	46973232
ENST00000450860	RP5-1091N2.9	-4.24962	-2.08733	4.24962	down	Ensembl	726	chrX	-	70403408	70418025	downstream	NM_001025265	CXorf65	hypothetical protein LOC158830	-19.5059	-4.28584	19.5059	down	chrX	-	70323738	70326638
ENST00000450860	RP5-1091N2.9	-4.24962	-2.08733	4.24962	down	Ensembl	726	chrX	-	70403408	70418025	downstream	NM_005120	MED12	mediator of RNA polymerase II transcription	-7.35447	-2.87862	7.35447	down	chrX	+	70338405	70362304
ENST00000450860	RP5-1091N2.9	-4.24962	-2.08733	4.24962	down	Ensembl	726	chrX	-	70403408	70418025	upstream	NM_001145409	NONO	non-POU domain-containing octamer-binding	3.04886	1.60827	3.04886	up	chrX	+	70503041	70521018
ENST00000450860	RP5-1091N2.9	-4.24962	-2.08733	4.24962	down	Ensembl	726	chrX	-	70403408	70418025	upstream	NM_004606	TAF1	transcription initiation factor TFIID subunit 1	-2.1126	-1.07902	2.1126	down	chrX	+	70586113	70685855
ENST00000427974	RP1-56L9.7	-2.13173	-1.09203	2.13173	down	Ensembl	741	chr6	-	160060338	160061133	upstream	NM_000636	SOD2	superoxide dismutase [Mn], mitochondrial isoform	2.34144	1.2274	2.34144	up	chr6	-	160102754	160114353
ENST00000426204	RP11-202G18.1	4.90773	2.29505	4.90773	up	Ensembl	744	chr9	-	113901525	114047116	upstream	NM_001146108	PTGR1	prostaglandin reductase 1 isoform 1	-2.557	-1.35445	2.557	down	chr9	-	114325246	114362135
ENST00000448327	RP11-345L23.1	-11.3234	-3.50124	11.3234	down	Ensembl	566	chr6	+	53493177	53496192	upstream	NM_021814	ELOVL5	elongation of very long chain fatty acids	3.33331	1.73696	3.33331	up	chr6	-	53132195	53213942
ENST00000446884	RP1-30G7.2	-2.76125	-1.46532	2.76125	down	Ensembl	626	chrX	-	46185358	46187080	upstream	NM_001129899	ZNF673	protein ZNF673 isoform 3	3.46459	1.79269	3.46459	up	chrX	+	46306623	46334074
ENST00000452336	RP4-530I15.6	-10.1242	-3.33973	10.1242	down	Ensembl	638	chr20	+	49262007	49276828	upstream	NM_002827	PTPN1	tyrosine-protein phosphatase non-receptor type	2.11372	1.07979	2.11372	up	chr20	+	49126890	49201086
ENST00000452336	RP4-530I15.6	-10.1242	-3.33973	10.1242	down	Ensembl	638	chr20	+	49262007	49276828	downstream	NM_017843	BCAS4	breast carcinoma-amplified sequence 4 isoform a	2.27732	1.18733	2.27732	up	chr20	+	49411466	49493714
ENST00000452336	RP4-530I15.6	-10.1242	-3.33973	10.1242	down	Ensembl	638	chr20	+	49262007	49276828	downstream	NM_015339	ADNP	activity-dependent neuroprotector homeobox	4.54853	2.1854	4.54853	up	chr20	-	49506882	49547527
ENST00000441638	AP002856.7	4.3662	2.12638	4.3662	up	Ensembl	569	chr11	+	131104432	131121711	downstream	NM_001048209	NTM	neurotrimin isoform 2	-2.33861	-1.22565	2.33861	down	chr11	+	131240370	132206716
ENST00000430537	AC007036.6	-5.00053	-2.32208	5.00053	down	Ensembl	674	chr7	-	30216002	30218630	downstream	NM_152793	C7orf41	hypothetical protein LOC222166	-2.78172	-1.47598	2.78172	down	chr7	+	30174551	30202381
ENST00000437892	RP11-124L5.7	-2.12991	-1.09079	2.12991	down	Ensembl	674	chr10	+	86039746	86048751	upstream	NM_207373	C10orf99	putative uncharacterized protein C10orf99	-32.9833	-5.04366	32.9833	down	chr10	+	85933553	85945050
ENST00000450216	CTA-150C2.13	-2.47547	-1.3077	2.47547	down	Ensembl	678	chr22	+	39317231	39320713	downstream	NM_004900	APOBEC3B	probable DNA dC->dU-editing enzyme APOBEC-3B	3.57388	1.83749	3.57388	up	chr22	+	39378404	39388783
ENST00000450216	CTA-150C2.13	-2.47547	-1.3077	2.47547	down	Ensembl	678	chr22	+	39317231	39320713	downstream	NM_014508	APOBEC3C	probable DNA dC->dU-editing enzyme APOBEC-3C	2.97919	1.57492	2.97919	up	chr22	+	39410264	39414825
ENST00000450216	CTA-150C2.13	-2.47547	-1.3077	2.47547	down	Ensembl	678	chr22	+	39317231	39320713	downstream	NM_001166003	APOBEC3H	DNA dC->dU-editing enzyme APOBEC-3H isoform 1	3.59263	1.84504	3.59263	up	chr22	+	39493228	39500072
ENST00000450671	RP3-475N16.1	-2.47606	-1.30805	2.47606	down	Ensembl	679	chr6	+	42908101	42911708	upstream	NM_198486	RPL7L1	60S ribosomal protein L7-like 1	2.98946	1.57988	2.98946	up	chr6	+	42847670	42854731
ENST00000450671	RP3-475N16.1	-2.47606	-1.30805	2.47606	down	Ensembl	679	chr6	+	42908101	42911708	upstream	NM_138296	PTCRA	pre T-cell antigen receptor alpha precursor	-23.9872	-4.58419	23.9872	down	chr6	+	42883726	42893575
ENST00000450671	RP3-475N16.1	-2.47606	-1.30805	2.47606	down	Ensembl	679	chr6	+	42908101	42911708	downstream	NM_057161	KLHDC3	kelch domain-containing protein 3 isoform 1	4.67788	2.22586	4.67788	up	chr6	+	42981976	42989031
ENST00000450671	RP3-475N16.1	-2.47606	-1.30805	2.47606	down	Ensembl	679	chr6	+	42908101	42911708	downstream	NM_032538	TTBK1	tau-tubulin kinase 1	3.52788	1.8188	3.52788	up	chr6	+	43211221	43255997
ENST00000438772	AC036222.1	2.37399	1.24731	2.37399	up	Ensembl	595	chr17	-	46710868	46724152	downstream	NM_001075099	SKAP1	src kinase-associated phosphoprotein 1 isoform	-8.08672	-3.01556	8.08672	down	chr17	-	46210801	46507594
ENST00000438772	AC036222.1	2.37399	1.24731	2.37399	up	Ensembl	595	chr17	-	46710868	46724152	upstream	NM_005175	ATP5G1	ATP synthase lipid-binding protein,	8.16016	3.0286	8.16016	up	chr17	+	46970147	46973232
ENST00000448058	RP11-17H4.2	-8.4579	-3.0803	8.4579	down	Ensembl	597	chr1	-	231727037	231747836	downstream	NM_032018	C1orf124	zinc finger RAD18 domain-containing protein	2.03259	1.02332	2.03259	up	chr1	+	231473681	231489989
ENST00000437967	AC006037.2	4.84355	2.27606	4.84355	up	Ensembl	598	chr2	+	235017359	235018125	upstream	NM_024080	TRPM8	transient receptor potential cation channel	3.98152	1.99332	3.98152	up	chr2	+	234826042	234928166
ENST00000437967	AC006037.2	4.84355	2.27606	4.84355	up	Ensembl	598	chr2	+	235017359	235018125	upstream	NM_006944	SPP2	secreted phosphoprotein 24 precursor	-2.21326	-1.14617	2.21326	down	chr2	+	234959345	234985776
uc004fnm.2	U00684	2.41863	1.27419	2.41863	up	UCSC_knowngene	552	chrX	+	154697946	154716706	upstream	NM_001007523	F8A2	factor VIII intron 22 protein	-2.30993	-1.20785	2.30993	down	chrX	+	154611763	154612879
NR_026816	PSORS1C3	-3.15528	-1.65777	3.15528	down	RefSeq_NR	600	chr6	-	31141511	31145676	downstream	NM_001010909	MUC21	mucin-21 precursor	-12.8018	-3.67827	12.8018	down	chr6	+	30951484	30957675
NR_026816	PSORS1C3	-3.15528	-1.65777	3.15528	down	RefSeq_NR	600	chr6	-	31141511	31145676	downstream	NM_014070	C6orf15	STG protein precursor	-2.70614	-1.43624	2.70614	down	chr6	-	31078999	31080332
NR_026816	PSORS1C3	-3.15528	-1.65777	3.15528	down	RefSeq_NR	600	chr6	-	31141511	31145676	downstream	NM_014068	PSORS1C1	psoriasis susceptibility 1 candidate 1	-2.39011	-1.25708	2.39011	down	chr6	+	31082607	31107869
ENST00000422405	RP11-318G21.3	-3.3762	-1.7554	3.3762	down	Ensembl	601	chr13	+	78402356	78408085	upstream	NM_003843	SCEL	sciellin isoform 2	-6.38955	-2.67571	6.38955	down	chr13	+	78109808	78219398
ENST00000425246	RP11-336A10.5	-2.10345	-1.07275	2.10345	down	Ensembl	613	chr10	-	5650437	5652756	downstream	NM_017422	CALML5	calmodulin-like protein 5	-7.72774	-2.95005	7.72774	down	chr10	-	5540657	5541533
ENST00000447883	RP11-277L2.3	-2.78441	-1.47737	2.78441	down	Ensembl	561	chr1	-	149576590	149577296	upstream	NM_000566	FCGR1A	high affinity immunoglobulin gamma Fc receptor I	17.1196	4.09757	17.1196	up	chr1	+	149754249	149764074
ENST00000447883	RP11-277L2.3	-2.78441	-1.47737	2.78441	down	Ensembl	561	chr1	-	149576590	149577296	upstream	NM_001005464	HIST2H3A	histone H3.2	6.50131	2.70073	6.50131	up	chr1	+	149824180	149824687
ENST00000447883	RP11-277L2.3	-2.78441	-1.47737	2.78441	down	Ensembl	561	chr1	-	149576590	149577296	upstream	NM_003517	HIST2H2AC	histone H2A type 2-C	6.00464	2.58608	6.00464	up	chr1	+	149858524	149858961
ENST00000424421	RP1-111D6.2	-2.74858	-1.45868	2.74858	down	Ensembl	562	chr6	-	149564434	149565137	upstream	NM_139126	PPIL4	peptidyl-prolyl cis-trans isomerase-like 4	2.01367	1.00983	2.01367	up	chr6	-	149825630	149867171
ENST00000444862	AP005273.1	-3.53177	-1.82039	3.53177	down	Ensembl	522	chr11	+	64268324	64272858	upstream	NM_031471	FERMT3	fermitin family homolog 3 short form	-2.73366	-1.45083	2.73366	down	chr11	+	63974151	63991363
ENST00000444862	AP005273.1	-3.53177	-1.82039	3.53177	down	Ensembl	522	chr11	+	64268324	64272858	upstream	NM_020155	GPR137	integral membrane protein GPR137 isoform 3	2.2285	1.15607	2.2285	up	chr11	+	64053581	64056972
ENST00000444862	AP005273.1	-3.53177	-1.82039	3.53177	down	Ensembl	522	chr11	+	64268324	64272858	upstream	NM_032251	CCDC88B	coiled-coil domain-containing protein 88B	-6.60442	-2.72343	6.60442	down	chr11	+	64107689	64125006
ENST00000442712	RP11-439E19.7	-2.15584	-1.10825	2.15584	down	Ensembl	522	chr1	+	246853348	246855123	upstream	NM_001167740	SMYD3	SET and MYND domain-containing protein 3 isoform	2.56362	1.35818	2.56362	up	chr1	-	245912641	246670644
ENST00000447500	RP11-206L10.8	2.10985	1.07714	2.10985	up	Ensembl	523	chr1	-	736258	745541	upstream	NM_021170	HES4	transcription factor HES-4 isoform 2	3.35234	1.74517	3.35234	up	chr1	-	934341	935552
ENST00000447500	RP11-206L10.8	2.10985	1.07714	2.10985	up	Ensembl	523	chr1	-	736258	745541	upstream	NM_005101	ISG15	ubiquitin-like protein ISG15 precursor	6.79802	2.76511	6.79802	up	chr1	+	948846	949919
ENST00000430978	RP11-199F6.5	-2.39134	-1.25782	2.39134	down	Ensembl	563	chr13	-	114582225	114586528	downstream	NM_182614	FAM70B	family with sequence similarity 70, member B	2.80383	1.4874	2.80383	up	chr13	+	114462215	114514899
ENST00000441085	RP11-98G7.1	5.9453	2.57175	5.9453	up	Ensembl	523	chr1	-	156416203	156426258	downstream	NM_199173	BGLAP	osteocalcin preproprotein	3.10529	1.63473	3.10529	up	chr1	+	156211950	156213123
ENST00000441085	RP11-98G7.1	5.9453	2.57175	5.9453	up	Ensembl	523	chr1	-	156416203	156426258	upstream	NM_021948	BCAN	brevican core protein isoform 1	-2.21352	-1.14634	2.21352	down	chr1	+	156611739	156629320
ENST00000424837	AP000282.3	-2.26787	-1.18134	2.26787	down	Ensembl	576	chr21	+	34331195	34332874	downstream	NM_138983	OLIG1	oligodendrocyte transcription factor 1	-3.70642	-1.89002	3.70642	down	chr21	+	34442449	34444728
ENST00000454185	RP11-568A7.3	-28.5116	-4.83348	28.5116	down	Ensembl	579	chr6	-	167650995	167653968	downstream	NM_031409	CCR6	C-C chemokine receptor type 6	-9.96621	-3.31705	9.96621	down	chr6	+	167536240	167552629
uc001hpx.2	BC032899	6.57036	2.71597	6.57036	up	UCSC_knowngene	502	chr1	+	226271655	226277990	upstream	NM_001130440	SRP9	signal recognition particle 9 kDa protein	4.49865	2.16949	4.49865	up	chr1	+	225965514	225978168
uc001hpx.2	BC032899	6.57036	2.71597	6.57036	up	UCSC_knowngene	502	chr1	+	226271655	226277990	downstream	NM_031944	MIXL1	homeobox protein MIXL1	-2.28528	-1.19237	2.28528	down	chr1	+	226411382	226413513
ENST00000448282	RP1-102H19.6	4.53437	2.1809	4.53437	up	Ensembl	542	chr6	+	88081310	88102519	upstream	NM_198568	GJB7	gap junction beta-7 protein	-24.1788	-4.59567	24.1788	down	chr6	-	87992696	88038996
ENST00000414795	AC017076.5	5.14111	2.36208	5.14111	up	Ensembl	506	chr2	-	6969010	6980595	upstream	NM_014746	RNF144A	probable E3 ubiquitin-protein ligase RNF144A	-3.62355	-1.8574	3.62355	down	chr2	+	7057522	7184309
ENST00000423122	RP11-65J3.1	2.16815	1.11646	2.16815	up	Ensembl	545	chr9	+	132104121	132121817	downstream	NM_177999	ASB6	ankyrin repeat and SOCS box protein 6 isoform 2	2.31929	1.21368	2.31929	up	chr9	-	132396882	132404448
ENST00000419664	AF064858.11	3.34204	1.74073	3.34204	up	Ensembl	509	chr21	-	40378573	40383255	downstream	NM_005239	ETS2	protein C-ets-2	2.45568	1.29612	2.45568	up	chr21	+	40177848	40196878
ENST00000425609	RP11-460G11.1	-5.2757	-2.39936	5.2757	down	Ensembl	547	chr13	+	43732766	43733602	upstream	NM_001002264	EPSTI1	epithelial-stromal interaction protein 1 isoform	9.092	3.1846	9.092	up	chr13	-	43462121	43566377
ENST00000444464	AC084809.3	-4.65846	-2.21985	4.65846	down	Ensembl	512	chr17	+	31232679	31233602	downstream	NM_173847	SPACA3	sperm acrosome membrane-associated protein 3	-2.88434	-1.52824	2.88434	down	chr17	+	31318881	31324892
ENST00000446107	RP11-168P8.3	-3.79163	-1.92282	3.79163	down	Ensembl	513	chr10	+	44407891	44409684	upstream	NM_145312	ZNF485	zinc finger protein 485	2.38319	1.25289	2.38319	up	chr10	+	44101854	44113352
ENST00000423568	RP11-556O15.1	-17.7833	-4.15245	17.7833	down	Ensembl	517	chr6	+	6993423	6995787	downstream	NM_001168344	RREB1	ras-responsive element-binding protein 1 isoform	-6.4336	-2.68563	6.4336	down	chr6	+	7107829	7252213
ENST00000456082	RP11-478H13.1	2.12688	1.08874	2.12688	up	Ensembl	517	chr10	+	29032673	29033592	upstream	NM_012342	BAMBI	BMP and activin membrane-bound inhibitor homolog	2.00083	1.0006	2.00083	up	chr10	+	28966423	28971868
ENST00000437646	AC004448.2	-4.35211	-2.12172	4.35211	down	Ensembl	520	chr17	+	19322347	19327670	upstream	NM_007148	RNF112	RING finger protein 112	-5.53362	-2.46822	5.53362	down	chr17	+	19314490	19320589
ENST00000437646	AC004448.2	-4.35211	-2.12172	4.35211	down	Ensembl	520	chr17	+	19322347	19327670	downstream	NM_000382	ALDH3A2	fatty aldehyde dehydrogenase isoform 2	-2.26825	-1.18158	2.26825	down	chr17	+	19552063	19580908
ENST00000424705	RP3-461P17.10	-2.81473	-1.493	2.81473	down	Ensembl	514	chr20	+	44076041	44076982	downstream	NM_006103	WFDC2	WAP four-disulfide core domain protein 2	-17.3698	-4.11851	17.3698	down	chr20	+	44098393	44110172
ENST00000424705	RP3-461P17.10	-2.81473	-1.493	2.81473	down	Ensembl	514	chr20	+	44076041	44076982	downstream	NM_080827	WFDC6	WAP four-disulfide core domain protein 6	-19.7295	-4.30228	19.7295	down	chr20	-	44162835	44168134
ENST00000456082	RP11-478H13.1	2.12688	1.08874	2.12688	up	Ensembl	517	chr10	+	29032673	29033592	upstream	NM_100486	WAC	WW domain-containing adapter protein with	2.0424	1.03027	2.0424	up	chr10	+	28822423	28909923
ENST00000415205	Z83851.3	15.7429	3.97663	15.7429	up	Ensembl	475	chr22	+	42665765	42671202	upstream	NM_181492	TCF20	transcription factor 20 isoform 2	2.17294	1.11965	2.17294	up	chr22	-	42556018	42611445
ENST00000450247	CTA-109P11.1	-2.40947	-1.26872	2.40947	down	Ensembl	475	chr10	-	119321594	119331968	downstream	NM_004098	EMX2	homeobox protein EMX2 isoform 1	2.88737	1.52976	2.88737	up	chr10	+	119301955	119309057
ENST00000444862	AP005273.1	-3.53177	-1.82039	3.53177	down	Ensembl	522	chr11	+	64268324	64272858	upstream	NM_003377	VEGFB	vascular endothelial growth factor B precursor	-2.01731	-1.01244	2.01731	down	chr11	+	64002265	64006259
ENST00000444862	AP005273.1	-3.53177	-1.82039	3.53177	down	Ensembl	522	chr11	+	64268324	64272858	upstream	NM_057092	FKBP2	peptidyl-prolyl cis-trans isomerase FKBP2	-4.71356	-2.23682	4.71356	down	chr11	+	64009587	64011607
ENST00000444862	AP005273.1	-3.53177	-1.82039	3.53177	down	Ensembl	522	chr11	+	64268324	64272858	upstream	NM_001170880	GPR137	integral membrane protein GPR137 isoform 2	2.27203	1.18398	2.27203	up	chr11	+	64053581	64056972
ENST00000444862	AP005273.1	-3.53177	-1.82039	3.53177	down	Ensembl	522	chr11	+	64268324	64272858	upstream	NM_001039496	C11orf20	hypothetical protein LOC25858	-4.63752	-2.21335	4.63752	down	chr11	+	64067862	64072239
ENST00000444862	AP005273.1	-3.53177	-1.82039	3.53177	down	Ensembl	522	chr11	+	64268324	64272858	upstream	NM_001006944	RPS6KA4	ribosomal protein S6 kinase alpha-4 isoform b	2.0505	1.03598	2.0505	up	chr11	+	64126624	64139687
ENST00000447500	RP11-206L10.8	2.10985	1.07714	2.10985	up	Ensembl	523	chr1	-	736258	745541	upstream	NM_152486	SAMD11	sterile alpha motif domain-containing protein	-6.96959	-2.80107	6.96959	down	chr1	+	861120	879961
ENST00000447500	RP11-206L10.8	2.10985	1.07714	2.10985	up	Ensembl	523	chr1	-	736258	745541	upstream	NM_198576	AGRN	agrin precursor	2.64083	1.40099	2.64083	up	chr1	+	955502	991492
ENST00000418242	RP11-148B18.3	-2.0732	-1.05186	2.0732	down	Ensembl	480	chr1	+	94798822	94800404	downstream	NM_001993	F3	tissue factor isoform 1 precursor	2.54447	1.34736	2.54447	up	chr1	-	94994731	95007413
ENST00000412797	RP11-70P17.1	-8.93866	-3.16006	8.93866	down	Ensembl	483	chr1	+	25907968	25916847	upstream	NM_001127691	RHD	blood group Rh(D) polypeptide isoform 2	2.53418	1.34152	2.53418	up	chr1	+	25598980	25656936
ENST00000441085	RP11-98G7.1	5.9453	2.57175	5.9453	up	Ensembl	523	chr1	-	156416203	156426258	downstream	NM_001008800	CCT3	T-complex protein 1 subunit gamma isoform c	4.44188	2.15117	4.44188	up	chr1	-	156278751	156308206
ENST00000441085	RP11-98G7.1	5.9453	2.57175	5.9453	up	Ensembl	523	chr1	-	156416203	156426258	upstream	NM_024540	MRPL24	39S ribosomal protein L24, mitochondrial	2.10235	1.072	2.10235	up	chr1	-	156707093	156710923
ENST00000412797	RP11-70P17.1	-8.93866	-3.16006	8.93866	down	Ensembl	483	chr1	+	25907968	25916847	upstream	NM_015627	LDLRAP1	low density lipoprotein receptor adapter protein	-5.05534	-2.33781	5.05534	down	chr1	+	25870075	25895377
ENST00000420876	RP11-511I2.2	-6.38409	-2.67448	6.38409	down	Ensembl	483	chr1	-	47846599	47874149	downstream	NM_001010969	CYP4A22	cytochrome P450 4A22 precursor	-2.43169	-1.28196	2.43169	down	chr1	+	47603106	47614526
ENST00000446145	RP11-239E10.3	5.47742	2.4535	5.47742	up	Ensembl	487	chr1	+	223354485	223361496	downstream	NM_001037175	SUSD4	sushi domain-containing protein 4 isoform b	4.05423	2.01943	4.05423	up	chr1	-	223408251	223537544
ENST00000424084	RP4-799D16.1	-2.36578	-1.24232	2.36578	down	Ensembl	490	chr1	-	25370197	25439610	upstream	NM_001127691	RHD	blood group Rh(D) polypeptide isoform 2	2.53418	1.34152	2.53418	up	chr1	+	25598980	25656936
ENST00000458170	RP11-69A21.2	2.39583	1.26053	2.39583	up	Ensembl	451	chrX	-	72027258	72028044	upstream	NM_001012977	PABPC1L2A	polyadenylate-binding protein 1-like 2	-6.35923	-2.66885	6.35923	down	chrX	-	72297176	72299351
ENST00000412797	RP11-70P17.1	-8.93866	-3.16006	8.93866	down	Ensembl	483	chr1	+	25907968	25916847	downstream	NM_024037	C1orf135	aurora A-binding protein	2.66353	1.41334	2.66353	up	chr1	-	26160496	26185848
ENST00000420876	RP11-511I2.2	-6.38409	-2.67448	6.38409	down	Ensembl	483	chr1	-	47846599	47874149	downstream	NM_001048166	STIL	SCL-interrupting locus protein isoform 1	6.68741	2.74145	6.68741	up	chr1	-	47715810	47779819
ENST00000424084	RP4-799D16.1	-2.36578	-1.24232	2.36578	down	Ensembl	490	chr1	-	25370197	25439610	upstream	NM_015484	SYF2	pre-mRNA-splicing factor SYF2 isoform 1	-2.00338	-1.00243	2.00338	down	chr1	-	25548766	25559013
ENST00000448988	RP11-372M18.1	2.03795	1.02712	2.03795	up	Ensembl	492	chr1	+	209498800	209501877	downstream	NM_001104548	LOC642587	hypothetical protein LOC642587	2.6632	1.41316	2.6632	up	chr1	+	209602167	209605892
ENST00000418953	RP13-30A9.2	-2.13713	-1.09567	2.13713	down	Ensembl	461	chr20	+	61265123	61267214	upstream	NM_178463	C20orf166	hypothetical protein LOC128826	-3.54094	-1.82413	3.54094	down	chr20	+	61147659	61167971
ENST00000418953	RP13-30A9.2	-2.13713	-1.09567	2.13713	down	Ensembl	461	chr20	+	61265123	61267214	downstream	NM_002531	NTSR1	neurotensin receptor type 1	-3.48527	-1.80127	3.48527	down	chr20	+	61340188	61394123
ENST00000418953	RP13-30A9.2	-2.13713	-1.09567	2.13713	down	Ensembl	461	chr20	+	61265123	61267214	downstream	NM_001853	COL9A3	collagen alpha-3(IX) chain precursor	-3.37385	-1.7544	3.37385	down	chr20	+	61448413	61472511
ENST00000417311	RP11-84P7.2	2.26112	1.17704	2.26112	up	Ensembl	504	chr9	+	36307038	36315276	upstream	NM_005893	CCIN	calicin	10.8256	3.43637	10.8256	up	chr9	+	36169388	36171331
ENST00000421821	RP11-298E9.4	-2.26881	-1.18194	2.26881	down	Ensembl	465	chr10	+	3247907	3248816	upstream	NM_014889	PITRM1	presequence protease, mitochondrial isoform 2	2.29723	1.1999	2.29723	up	chr10	-	3179919	3215003
ENST00000416507	RP11-787B4.2	-2.93466	-1.55319	2.93466	down	Ensembl	509	chr9	+	118774639	118775244	downstream	NM_002581	PAPPA	pappalysin-1 preproprotein	4.33756	2.11688	4.33756	up	chr9	+	118916070	119164600
ENST00000444464	AC084809.3	-4.65846	-2.21985	4.65846	down	Ensembl	512	chr17	+	31232679	31233602	downstream	NM_001033504	TMEM98	transmembrane protein 98	2.1019	1.0717	2.1019	up	chr17	+	31254927	31268667
ENST00000428641	RP11-66D17.5	-2.55196	-1.3516	2.55196	down	Ensembl	433	chr1	-	156682003	156682966	downstream	NM_021948	BCAN	brevican core protein isoform 1	-2.21352	-1.14634	2.21352	down	chr1	+	156611739	156629320
ENST00000428641	RP11-66D17.5	-2.55196	-1.3516	2.55196	down	Ensembl	433	chr1	-	156682003	156682966	upstream	NM_144702	LRRC71	leucine-rich repeat-containing protein 71	-157.307	-7.29744	157.307	down	chr1	+	156890423	156902880
uc010nxz.1	FLJ39609	-2.97187	-1.57137	2.97187	down	UCSC_knowngene	436	chr1	-	852952	854817	upstream	NM_021170	HES4	transcription factor HES-4 isoform 2	3.35234	1.74517	3.35234	up	chr1	-	934341	935552
ENST00000457239	RP11-71G12.1	-10.7448	-3.42557	10.7448	down	Ensembl	471	chr1	+	157155177	157157195	upstream	NM_001080471	PEAR1	platelet endothelial aggregation receptor 1	-2.20096	-1.13814	2.20096	down	chr1	+	156863522	156886226
ENST00000450255	RP1-140K8.1	-26.0457	-4.70298	26.0457	down	Ensembl	441	chr6	+	3893359	3894524	downstream	NM_003913	PRPF4B	serine/threonine-protein kinase PRP4 homolog	3.31176	1.7276	3.31176	up	chr6	+	4021568	4065217
ENST00000415205	Z83851.3	15.7429	3.97663	15.7429	up	Ensembl	475	chr22	+	42665765	42671202	upstream	NM_033318	C22orf32	hypothetical protein LOC91689 precursor	-2.77342	-1.47167	2.77342	down	chr22	+	42475698	42480288
ENST00000422697	AC004535.2	-2.05678	-1.04039	2.05678	down	Ensembl	449	chr7	+	10742302	10747033	downstream	NM_014660	PHF14	PHD finger protein 14	2.53032	1.33932	2.53032	up	chr7	+	11013498	11147376
ENST00000418242	RP11-148B18.3	-2.0732	-1.05186	2.0732	down	Ensembl	480	chr1	+	94798822	94800404	downstream	NM_001122674	ABCD3	ATP-binding cassette sub-family D member 3	-2.94254	-1.55706	2.94254	down	chr1	+	94883932	94944260
ENST00000414875	RP1-153P14.5	-3.44691	-1.7853	3.44691	down	Ensembl	442	chr6	+	37517779	37518636	upstream	NM_183078	RNF8	E3 ubiquitin-protein ligase RNF8 isoform 2	3.09699	1.63087	3.09699	up	chr6	+	37321747	37362514
ENST00000451869	RP1-241P17.1	-2.94739	-1.55944	2.94739	down	Ensembl	444	chrX	+	114957296	114959381	upstream	NM_001136025	PLS3	plastin-3 isoform 1	3.71852	1.89473	3.71852	up	chrX	+	114827818	114885179
ENST00000427806	RP11-415A20.1	-2.05405	-1.03847	2.05405	down	Ensembl	448	chr1	-	77223808	77244952	downstream	NM_152996	ST6GALNAC3	alpha-N-acetylgalactosaminide	-2.61021	-1.38417	2.61021	down	chr1	+	76540388	77096669
ENST00000427806	RP11-415A20.1	-2.05405	-1.03847	2.05405	down	Ensembl	448	chr1	-	77223808	77244952	upstream	NM_030965	ST6GALNAC5	alpha-N-acetylgalactosaminide	5.05406	2.33744	5.05406	up	chr1	+	77333185	77529737
ENST00000438185	LL22NC03-102D1.18	-2.63972	-1.40039	2.63972	down	Ensembl	451	chr22	-	23035262	23035797	downstream	NM_199127	GGTLC2	gamma-glutamyltransferase light chain 2 isoform	-2.63176	-1.39603	2.63176	down	chr22	+	22988781	22990368
ENST00000438185	LL22NC03-102D1.18	-2.63972	-1.40039	2.63972	down	Ensembl	451	chr22	-	23035262	23035797	upstream	NM_001178126	IGLL5	immunoglobulin lambda-like polypeptide 5	-14.2878	-3.83671	14.2878	down	chr22	+	23229959	23238013
ENST00000458170	RP11-69A21.2	2.39583	1.26053	2.39583	up	Ensembl	451	chrX	-	72027258	72028044	upstream	NM_001042506	PABPC1L2B	polyadenylate-binding protein 1-like 2	-2.17712	-1.12242	2.17712	down	chrX	+	72223351	72225551
ENST00000447956	RP11-128M1.1	-105.285	-6.71816	105.285	down	Ensembl	415	chr20	+	2187862	2193797	upstream	NM_001040023	SIRPA	tyrosine-protein phosphatase non-receptor type	-3.51198	-1.81228	3.51198	down	chr20	+	1875825	1920540
ENST00000447956	RP11-128M1.1	-105.285	-6.71816	105.285	down	Ensembl	415	chr20	+	2187862	2193797	upstream	NM_080836	STK35	serine/threonine-protein kinase 35	4.55463	2.18733	4.55463	up	chr20	+	2082527	2129198
ENST00000359838	RP3-337D23.3	-2.22571	-1.15427	2.22571	down	Ensembl	453	chr6	+	147480060	147502128	downstream	NM_139244	STXBP5	syntaxin-binding protein 5 isoform a	2.0106	1.00762	2.0106	up	chr6	+	147525507	147708707
ENST00000414923	RP11-153F1.2	-2.62806	-1.394	2.62806	down	Ensembl	418	chr1	+	103957500	103968087	downstream	NM_001008219	AMY1C	alpha-amylase 1 precursor	-72.5842	-6.18158	72.5842	down	chr1	-	104230040	104238911
ENST00000416722	C21orf111	-2.52084	-1.33391	2.52084	down	Ensembl	455	chr21	-	46758504	46761905	upstream	NM_194255	SLC19A1	folate transporter 1 isoform 1	3.46654	1.7935	3.46654	up	chr21	-	46934628	46962385
ENST00000424162	RP1-60O19.2	-20.4277	-4.35246	20.4277	down	Ensembl	419	chr6	+	107143409	107147869	downstream	NM_001142470	C6orf203	hypothetical protein LOC51250 isoform b	2.3786	1.25011	2.3786	up	chr6	+	107349406	107372547
ENST00000419428	RP11-356N1.2	2.74213	1.4553	2.74213	up	Ensembl	432	chr1	+	108614103	108617141	downstream	NM_001143989	NBPF4	neuroblastoma breakpoint family, member 4	-3.65693	-1.87063	3.65693	down	chr1	-	108765962	108786703
ENST00000418403	RP11-462G2.1	-2.87986	-1.526	2.87986	down	Ensembl	397	chr6	+	71104589	71109120	downstream	NM_020819	FAM135A	hypothetical protein LOC57579 isoform b	3.6535	1.86928	3.6535	up	chr6	+	71123106	71270877
ENST00000424162	RP1-60O19.2	-20.4277	-4.35246	20.4277	down	Ensembl	419	chr6	+	107143409	107147869	upstream	NM_001624	AIM1	absent in melanoma 1 protein	3.25035	1.70059	3.25035	up	chr6	+	106959729	107018334
ENST00000444744	RP11-428O18.4	-2.19482	-1.1341	2.19482	down	Ensembl	420	chr13	-	27810418	27810948	upstream	NM_002097	GTF3A	transcription factor IIIA	-2.15924	-1.11052	2.15924	down	chr13	+	27998680	28009846
ENST00000415726	RP11-336K24.5	-4.82578	-2.27076	4.82578	down	Ensembl	401	chr1	+	155961180	155971578	upstream	NM_001037533	GON4L	GON-4-like protein isoform a	2.04018	1.02869	2.04018	up	chr1	-	155719509	155826972
ENST00000415726	RP11-336K24.5	-4.82578	-2.27076	4.82578	down	Ensembl	401	chr1	+	155961180	155971578	upstream	NM_152280	SYT11	synaptotagmin-11	2.26707	1.18083	2.26707	up	chr1	+	155829259	155854990
ENST00000415726	RP11-336K24.5	-4.82578	-2.27076	4.82578	down	Ensembl	401	chr1	+	155961180	155971578	upstream	NM_004723	ARHGEF2	rho guanine nucleotide exchange factor 2 isoform	-2.89762	-1.53487	2.89762	down	chr1	-	155916629	155947966
ENST00000415101	RP11-402G3.5	-2.34294	-1.22832	2.34294	down	Ensembl	404	chr9	-	117418583	117424654	downstream	NM_030767	AKNA	AT-hook-containing transcription factor	-2.14804	-1.10302	2.14804	down	chr9	-	117096432	117156685
ENST00000443719	RP11-101P17.10	-2.0683	-1.04845	2.0683	down	Ensembl	405	chr13	+	21808706	21809343	upstream	NM_024026	MRP63	ribosomal protein 63, mitochondrial	-2.24988	-1.16985	2.24988	down	chr13	+	21750371	21753220
ENST00000455931	RP11-348F1.2	-3.05221	-1.60986	3.05221	down	Ensembl	406	chrX	+	51139382	51208513	upstream	NM_153183	NUDT10	diphosphoinositol polyphosphate phosphohydrolase	2.67471	1.41938	2.67471	up	chrX	+	51075082	51080377
ENST00000419428	RP11-356N1.2	2.74213	1.4553	2.74213	up	Ensembl	432	chr1	+	108614103	108617141	upstream	NM_006113	VAV3	guanine nucleotide exchange factor VAV3 isoform	-3.04811	-1.60792	3.04811	down	chr1	-	108113781	108507545
ENST00000428641	RP11-66D17.5	-2.55196	-1.3516	2.55196	down	Ensembl	433	chr1	-	156682003	156682966	downstream	NM_198427	BCAN	brevican core protein isoform 2	-6.08054	-2.6042	6.08054	down	chr1	+	156611739	156623264
ENST00000428641	RP11-66D17.5	-2.55196	-1.3516	2.55196	down	Ensembl	433	chr1	-	156682003	156682966	upstream	NM_024540	MRPL24	39S ribosomal protein L24, mitochondrial	2.10235	1.072	2.10235	up	chr1	-	156707093	156710923
ENST00000428641	RP11-66D17.5	-2.55196	-1.3516	2.55196	down	Ensembl	433	chr1	-	156682003	156682966	upstream	NM_001161444	SH2D2A	SH2 domain-containing protein 2A isoform 2	-2.02063	-1.0148	2.02063	down	chr1	-	156776848	156786640
uc010nxz.1	FLJ39609	-2.97187	-1.57137	2.97187	down	UCSC_knowngene	436	chr1	-	852952	854817	upstream	NM_152486	SAMD11	sterile alpha motif domain-containing protein	-6.96959	-2.80107	6.96959	down	chr1	+	861120	879961
uc010nxz.1	FLJ39609	-2.97187	-1.57137	2.97187	down	UCSC_knowngene	436	chr1	-	852952	854817	upstream	NM_198576	AGRN	agrin precursor	2.64083	1.40099	2.64083	up	chr1	+	955502	991492
ENST00000412855	RP11-396C23.2	2.91526	1.54362	2.91526	up	Ensembl	407	chr1	+	226274581	226277993	upstream	NM_001130440	SRP9	signal recognition particle 9 kDa protein	4.49865	2.16949	4.49865	up	chr1	+	225965514	225978168
ENST00000448825	RP11-307O10.1	-2.60518	-1.38138	2.60518	down	Ensembl	408	chr20	-	4411807	4412320	downstream	NM_175842	SMOX	spermine oxidase isoform 4	2.5037	1.32406	2.5037	up	chr20	+	4129449	4168369
ENST00000447396	RP1-302D9.1	-2.16853	-1.11672	2.16853	down	Ensembl	437	chr22	-	33501368	33502045	downstream	NM_000362	TIMP3	metalloproteinase inhibitor 3 precursor	-8.72181	-3.12463	8.72181	down	chr22	+	33196801	33259028
ENST00000450255	RP1-140K8.1	-26.0457	-4.70298	26.0457	down	Ensembl	441	chr6	+	3893359	3894524	upstream	NM_183373	C6orf145	PX domain-containing protein C6orf145	2.74003	1.45419	2.74003	up	chr6	-	3722835	3752246
ENST00000416242	RP11-143M1.4	-2.21984	-1.15045	2.21984	down	Ensembl	413	chr9	-	112715	113754	upstream	NM_203447	DOCK8	dedicator of cytokinesis protein 8 isoform 1	-3.37005	-1.75277	3.37005	down	chr9	+	214864	465259
ENST00000456537	AC004448.5	2.08717	1.06155	2.08717	up	Ensembl	441	chr17	-	19342455	19364048	upstream	NM_000382	ALDH3A2	fatty aldehyde dehydrogenase isoform 2	-2.26825	-1.18158	2.26825	down	chr17	+	19552063	19580908
ENST00000440492	RP11-288L9.1	10.5977	3.40568	10.5977	up	Ensembl	441	chr1	-	27986838	27989233	downstream	NM_004672	MAP3K6	mitogen-activated protein kinase kinase kinase	-2.07254	-1.0514	2.07254	down	chr1	-	27681669	27693337
ENST00000440492	RP11-288L9.1	10.5977	3.40568	10.5977	up	Ensembl	441	chr1	-	27986838	27989233	upstream	NM_002038	IFI6	interferon alpha-inducible protein 6 isoform a	10.4141	3.38047	10.4141	up	chr1	-	27992571	27998724
ENST00000415726	RP11-336K24.5	-4.82578	-2.27076	4.82578	down	Ensembl	401	chr1	+	155961180	155971578	downstream	NM_199173	BGLAP	osteocalcin preproprotein	3.10529	1.63473	3.10529	up	chr1	+	156211950	156213123
ENST00000443719	RP11-101P17.10	-2.0683	-1.04845	2.0683	down	Ensembl	405	chr13	+	21808706	21809343	upstream	NM_005870	SAP18	histone deacetylase complex subunit SAP18	-2.60125	-1.3792	2.60125	down	chr13	+	21714652	21723224
ENST00000419064	RP11-13P5.2	2.36562	1.24222	2.36562	up	Ensembl	385	chr6	+	159586940	159588385	downstream	NM_032532	FNDC1	fibronectin type III domain-containing protein	14.0915	3.81675	14.0915	up	chr6	+	159590428	159693140
ENST00000412855	RP11-396C23.2	2.91526	1.54362	2.91526	up	Ensembl	407	chr1	+	226274581	226277993	upstream	NM_003133	SRP9	signal recognition particle 9 kDa protein	3.36192	1.74928	3.36192	up	chr1	+	225965514	225978168
ENST00000412855	RP11-396C23.2	2.91526	1.54362	2.91526	up	Ensembl	407	chr1	+	226274581	226277993	upstream	NM_000120	EPHX1	epoxide hydrolase 1	-341.769	-8.41688	341.769	down	chr1	+	226013001	226033262
ENST00000412855	RP11-396C23.2	2.91526	1.54362	2.91526	up	Ensembl	407	chr1	+	226274581	226277993	downstream	NM_031944	MIXL1	homeobox protein MIXL1	-2.28528	-1.19237	2.28528	down	chr1	+	226411382	226413513
ENST00000448825	RP11-307O10.1	-2.60518	-1.38138	2.60518	down	Ensembl	408	chr20	-	4411807	4412320	downstream	NM_175840	SMOX	spermine oxidase isoform 2	2.37381	1.24721	2.37381	up	chr20	+	4129449	4168369
ENST00000438178	AC008278.2	-9.62635	-3.26699	9.62635	down	Ensembl	409	chr2	+	15704293	15713992	upstream	NM_015909	NBAS	neuroblastoma-amplified sequence	-2.12857	-1.08989	2.12857	down	chr2	-	15307031	15701454
ENST00000446401	AC104653.1	-2.13978	-1.09746	2.13978	down	Ensembl	390	chr2	-	114588764	114600933	downstream	NM_007082	RABL2A	rab-like protein 2A	-2.6792	-1.4218	2.6792	down	chr2	+	114384816	114400975
ENST00000446401	AC104653.1	-2.13978	-1.09746	2.13978	down	Ensembl	390	chr2	-	114588764	114600933	downstream	NM_025181	SLC35F5	solute carrier family 35 member F5	2.03618	1.02587	2.03618	up	chr2	-	114471932	114514400
ENST00000414923	RP11-153F1.2	-2.62806	-1.394	2.62806	down	Ensembl	418	chr1	+	103957500	103968087	downstream	NM_020978	AMY2B	alpha-amylase 2B precursor	-68.0096	-6.08767	68.0096	down	chr1	+	104097321	104122149
ENST00000414923	RP11-153F1.2	-2.62806	-1.394	2.62806	down	Ensembl	418	chr1	+	103957500	103968087	downstream	NM_000699	AMY2A	pancreatic alpha-amylase precursor	-76.8409	-6.2638	76.8409	down	chr1	+	104159998	104168400
ENST00000454056	GS1-756B1.2	-2.19872	-1.13666	2.19872	down	Ensembl	365	chr10	-	8301293	8302767	downstream	NM_001002295	GATA3	trans-acting T-cell-specific transcription	-2.30724	-1.20617	2.30724	down	chr10	+	8096666	8117164
ENST00000448198	XXbac-BPG254F23.7	-11.4128	-3.51258	11.4128	down	Ensembl	381	chr6	+	32685781	32686604	downstream	NM_020056	HLA-DQA2	HLA class II histocompatibility antigen, DQ	-8.64636	-3.11209	8.64636	down	chr6	+	32709162	32714664
ENST00000437631	RP13-221M14.2	2.17553	1.12137	2.17553	up	Ensembl	384	chr1	+	13146776	13147256	downstream	NM_001013692	PRAMEF3	PRAME family member 3	-5.50492	-2.46072	5.50492	down	chr1	-	13328195	13331692
ENST00000427911	AP000281.2	-2.20808	-1.14279	2.20808	down	Ensembl	384	chr21	-	34216676	34222244	upstream	NM_138983	OLIG1	oligodendrocyte transcription factor 1	-3.70642	-1.89002	3.70642	down	chr21	+	34442449	34444728
ENST00000418403	RP11-462G2.1	-2.87986	-1.526	2.87986	down	Ensembl	397	chr6	+	71104589	71109120	upstream	NM_001858	COL19A1	collagen alpha-1(XIX) chain precursor	13.4756	3.75228	13.4756	up	chr6	+	70576447	70922157
ENST00000456795	RP3-331H24.4	3.05383	1.61062	3.05383	up	Ensembl	352	chr6	+	72038644	72039509	upstream	NM_024576	OGFRL1	opioid growth factor receptor-like protein 1	4.55371	2.18704	4.55371	up	chr6	+	71998476	72011973
ENST00000434938	NCRNA00106	-2.14514	-1.10107	2.14514	down	Ensembl	357	chrX	-	1515319	1517852	downstream	NM_006140	CSF2RA	granulocyte-macrophage colony-stimulating factor	-2.42206	-1.27624	2.42206	down	chrX	+	1387692	1428828
ENST00000434938	NCRNA00106	-2.14514	-1.10107	2.14514	down	Ensembl	357	chrX	-	1515319	1517852	downstream	NM_172245	CSF2RA	granulocyte-macrophage colony-stimulating factor	-2.42381	-1.27727	2.42381	down	chrX	+	1387692	1428828
ENST00000416924	RP11-484I6.6	-3.01927	-1.5942	3.01927	down	Ensembl	361	chr13	+	103532285	103533517	upstream	NM_017693	BIVM	basic immunoglobulin-like variable	5.16423	2.36855	5.16423	up	chr13	+	103451398	103493888
ENST00000434938	NCRNA00106	-2.14514	-1.10107	2.14514	down	Ensembl	357	chrX	-	1515319	1517852	upstream	NM_178129	P2RY8	P2Y purinoceptor 8	-16.5901	-4.05225	16.5901	down	chrX	-	1581465	1656037
ENST00000442416	AC009502.3	-2.16594	-1.115	2.16594	down	Ensembl	361	chr2	+	220594831	220602464	upstream	NM_001173476	SPEG	striated muscle preferentially expressed protein	-3.49942	-1.80711	3.49942	down	chr2	+	220325533	220331584
ENST00000442416	AC009502.3	-2.16594	-1.115	2.16594	down	Ensembl	361	chr2	+	220594831	220602464	upstream	NM_001173431	OBSL1	obscurin-like protein 1 isoform 2 precursor	-2.43841	-1.28594	2.43841	down	chr2	-	220419871	220436268
ENST00000422894	RP5-894D12.3	-10.2422	-3.35645	10.2422	down	Ensembl	318	chr6	+	170584461	170588557	downstream	NM_001172085	TBP	TATA-box-binding protein isoform 2	2.39929	1.26261	2.39929	up	chr6	+	170863420	170881958
ENST00000425322	AC006041.1	-7.57188	-2.92065	7.57188	down	Ensembl	328	chr7	-	15880921	15881985	downstream	NM_001004320	AGMO	alkylglycerol monooxygenase	18.1584	4.18257	18.1584	up	chr7	-	15239942	15601640
ENST00000446887	RP1-111C20.3	-5.88234	-2.55639	5.88234	down	Ensembl	331	chr6	-	159485759	159486305	upstream	NM_032532	FNDC1	fibronectin type III domain-containing protein	14.0915	3.81675	14.0915	up	chr6	+	159590428	159693140
ENST00000457746	AP006216.5	-2.63351	-1.39698	2.63351	down	Ensembl	333	chr11	-	116683919	116684719	upstream	NM_000039	APOA1	apolipoprotein A-I preproprotein	-2.29289	-1.19716	2.29289	down	chr11	-	116706468	116708338
ENST00000440750	RP11-534L6.2	-6.13315	-2.61663	6.13315	down	Ensembl	335	chr10	-	49872243	49880469	downstream	NM_002750	MAPK8	mitogen-activated protein kinase 8 isoform JNK1	-3.18199	-1.66993	3.18199	down	chr10	+	49609686	49643183
ENST00000446290	RP11-274B18.2	4.19683	2.0693	4.19683	up	Ensembl	338	chr9	-	71158456	71161505	downstream	NM_021965	PGM5	phosphoglucomutase-like protein 5	-3.30069	-1.72277	3.30069	down	chr9	+	70971814	71145977
ENST00000433825	XX-FW83128A1.2	-2.0652	-1.04628	2.0652	down	Ensembl	341	chrX	-	153562309	153563387	downstream	NM_000513	OPN1MW	medium-wave-sensitive opsin 1	-5.65798	-2.50029	5.65798	down	chrX	+	153485202	153499470
ENST00000433825	XX-FW83128A1.2	-2.0652	-1.04628	2.0652	down	Ensembl	341	chrX	-	153562309	153563387	upstream	NM_001493	GDI1	rab GDP dissociation inhibitor alpha	3.69489	1.88553	3.69489	up	chrX	+	153665258	153671814
ENST00000433825	XX-FW83128A1.2	-2.0652	-1.04628	2.0652	down	Ensembl	341	chrX	-	153562309	153563387	upstream	NM_001327	CTAG1B	cancer/testis antigen 1	-2.52264	-1.33494	2.52264	down	chrX	+	153813417	153815075
ENST00000425153	RP11-205K6.2	2.02366	1.01697	2.02366	up	Ensembl	339	chr9	+	129289896	129292622	upstream	NM_001011703	FAM125B	multivesicular body subunit 12B isoform 2	3.67975	1.87961	3.67975	up	chr9	+	129089127	129159912
ENST00000452795	RP4-798A10.4	-4.28264	-2.0985	4.28264	down	Ensembl	342	chr1	+	16847188	16848303	downstream	NM_017940	NBPF1	hypothetical protein LOC55672	2.05686	1.04044	2.05686	up	chr1	-	16890411	16939982
ENST00000412464	RP11-426A6.8	2.67252	1.4182	2.67252	up	Ensembl	248	chr9	-	138356343	138356726	upstream	NM_001048265	C9orf116	hypothetical protein LOC138162 isoform 1	-12.6808	-3.66457	12.6808	down	chr9	-	138387025	138391761
ENST00000412464	RP11-426A6.8	2.67252	1.4182	2.67252	up	Ensembl	248	chr9	-	138356343	138356726	upstream	NM_144654	C9orf116	hypothetical protein LOC138162 isoform 2	-9.65844	-3.27179	9.65844	down	chr9	-	138387025	138391761
ENST00000421153	RP4-811H24.8	-3.90309	-1.96462	3.90309	down	Ensembl	267	chr1	+	32817121	32819143	downstream	NM_001145720	ZBTB8B	zinc finger and BTB domain-containing protein	3.70935	1.89117	3.70935	up	chr1	+	32930657	32953459
uc004dgl.1	BC015977	-4.41105	-2.14112	4.41105	down	UCSC_knowngene	271	chrX	-	46185713	46187080	upstream	NM_001129899	ZNF673	protein ZNF673 isoform 3	3.46459	1.79269	3.46459	up	chrX	+	46306623	46334074
ENST00000443579	RP1-159A19.4	-2.10259	-1.07217	2.10259	down	Ensembl	283	chr1	+	27852315	27857072	upstream	NM_015023	WDTC1	WD and tetratricopeptide repeats protein 1	-2.76659	-1.46811	2.76659	down	chr1	+	27561006	27635110
ENST00000443579	RP1-159A19.4	-2.10259	-1.07217	2.10259	down	Ensembl	283	chr1	+	27852315	27857072	downstream	NM_002038	IFI6	interferon alpha-inducible protein 6 isoform a	10.4141	3.38047	10.4141	up	chr1	-	27992571	27998724
ENST00000444515	C1orf46	-14.1653	-3.82429	14.1653	down	Ensembl	302	chr1	+	152627952	152629280	downstream	NM_178430	LCE2D	late cornified envelope protein 2D	-4.73583	-2.24362	4.73583	down	chr1	+	152635871	152637135
ENST00000444515	C1orf46	-14.1653	-3.82429	14.1653	down	Ensembl	302	chr1	+	152627952	152629280	downstream	NM_178353	LCE1E	late cornified envelope protein 1E	2.96128	1.56622	2.96128	up	chr1	+	152758752	152760901
ENST00000444515	C1orf46	-14.1653	-3.82429	14.1653	down	Ensembl	302	chr1	+	152627952	152629280	downstream	NM_005547	IVL	involucrin	-454.194	-8.82717	454.194	down	chr1	+	152881038	152884362
ENST00000442526	RP11-517P14.2	3.53542	1.82188	3.53542	up	Ensembl	303	chr10	+	43916046	43917254	upstream	NM_145313	RASGEF1A	ras-GEF domain-containing family member 1A	-2.19686	-1.13544	2.19686	down	chr10	-	43689983	43762367
ENST00000442526	RP11-517P14.2	3.53542	1.82188	3.53542	up	Ensembl	303	chr10	+	43916046	43917254	upstream	NM_001098206	HNRNPF	heterogeneous nuclear ribonucleoprotein F	2.47662	1.30837	2.47662	up	chr10	-	43881064	43903299
ENST00000420693	RP11-290D2.3	-2.30201	-1.20289	2.30201	down	Ensembl	310	chr13	+	45924457	45925485	upstream	NM_004128	GTF2F2	general transcription factor IIF subunit 2	2.37032	1.24508	2.37032	up	chr13	+	45694630	45858239
ENST00000444515	C1orf46	-14.1653	-3.82429	14.1653	down	Ensembl	302	chr1	+	152627952	152629280	upstream	NM_016190	CRNN	cornulin	-7.61918	-2.92964	7.61918	down	chr1	-	152381718	152386750
ENST00000444515	C1orf46	-14.1653	-3.82429	14.1653	down	Ensembl	302	chr1	+	152627952	152629280	upstream	NM_178433	LCE3B	late cornified envelope protein 3B	-2.46551	-1.30189	2.46551	down	chr1	+	152586286	152586574
ENST00000444515	C1orf46	-14.1653	-3.82429	14.1653	down	Ensembl	302	chr1	+	152627952	152629280	downstream	NM_178429	LCE2C	late cornified envelope protein 2C	-7.36802	-2.88128	7.36802	down	chr1	+	152647770	152649049
ENST00000444515	C1orf46	-14.1653	-3.82429	14.1653	down	Ensembl	302	chr1	+	152627952	152629280	downstream	NM_014357	LCE2B	late cornified envelope protein 2B	-3.83859	-1.94058	3.83859	down	chr1	+	152658598	152659876
ENST00000444515	C1orf46	-14.1653	-3.82429	14.1653	down	Ensembl	302	chr1	+	152627952	152629280	downstream	NM_001128600	LCE6A	late cornified envelope protein 6A	-2.26999	-1.18269	2.26999	down	chr1	+	152815329	152816459
ENST00000419514	RP11-366O17.2	38.9773	5.28456	38.9773	up	Ensembl	192	chr13	+	43385972	43386428	upstream	NM_182508	C13orf30	hypothetical protein LOC144809	-88.8899	-6.47395	88.8899	down	chr13	+	43355685	43365685
ENST00000419514	RP11-366O17.2	38.9773	5.28456	38.9773	up	Ensembl	192	chr13	+	43385972	43386428	downstream	NM_001002264	EPSTI1	epithelial-stromal interaction protein 1 isoform	9.092	3.1846	9.092	up	chr13	-	43462121	43566377
ENST00000419514	RP11-366O17.2	38.9773	5.28456	38.9773	up	Ensembl	192	chr13	+	43385972	43386428	downstream	NM_033255	EPSTI1	epithelial-stromal interaction protein 1 isoform	4.31687	2.10998	4.31687	up	chr13	-	43462121	43566377
ENST00000446733	RP11-550C4.6	-2.88906	-1.5306	2.88906	down	Ensembl	197	chr6	-	47697562	47708477	upstream	NM_001013732	C6orf138	patched domain-containing protein C6orf138	2.41286	1.27074	2.41286	up	chr6	-	47845763	48036425
ENST00000434255	RP1-32B1.4	3.12379	1.6433	3.12379	up	Ensembl	216	chr6	+	135581133	135582071	upstream	NM_001145158	HBS1L	HBS1-like protein isoform 2	2.77242	1.47114	2.77242	up	chr6	-	135281516	135376036
ENST00000434255	RP1-32B1.4	3.12379	1.6433	3.12379	up	Ensembl	216	chr6	+	135581133	135582071	upstream	NM_001161658	MYB	transcriptional activator Myb isoform 6	2.94798	1.55973	2.94798	up	chr6	+	135502452	135540311
ENST00000434255	RP1-32B1.4	3.12379	1.6433	3.12379	up	Ensembl	216	chr6	+	135581133	135582071	upstream	NM_001161659	MYB	transcriptional activator Myb isoform 7	3.46467	1.79272	3.46467	up	chr6	+	135502452	135540311
ENST00000415471	RP11-100G15.10	-2.29238	-1.19684	2.29238	down	Ensembl	211	chr9	-	94912662	94919727	upstream	NM_013417	IARS	isoleucyl-tRNA synthetase, cytoplasmic	2.42743	1.27943	2.42743	up	chr9	-	94972624	95055972
ENST00000434255	RP1-32B1.4	3.12379	1.6433	3.12379	up	Ensembl	216	chr6	+	135581133	135582071	upstream	NM_006620	HBS1L	HBS1-like protein isoform 1	2.86545	1.51876	2.86545	up	chr6	-	135281516	135376036
ENST00000412464	RP11-426A6.8	2.67252	1.4182	2.67252	up	Ensembl	248	chr9	-	138356343	138356726	upstream	NM_001018049	PAEP	glycodelin precursor	2.25405	1.17252	2.25405	up	chr9	+	138453603	138458622

## Sheet: M2 vs T3
# Condition pairs: M2 vs T3 # Fold Change cut-off: 2.0 This table contains the differentially expressed enhancer-like LncRNAs and their nearby coding genes (distance < 300 kb). # Column A: seqname, the sequence identifier. # Column B: GeneSymbol, the symbol of the LncRNA. # Column C: Fold change - LncRNAs, the ratio of normalized intensities between two samples, positive value indicates up-regula…
seqname	GeneSymbol	Fold change - LncRNAs	Log Fold change - LncRNAs	Absolute Fold change - LncRNAs	Regulation - LncRNAs	source	RNAlength	Chrom	Strand	txStart	txEnd	GenomeRelationship	NearbyGene	NearbyGeneSymbol	NearbyProteinName	Fold change - mRNAs	Log Fold change - mRNAs	Absolute Fold change - mRNAs	Regulation - mRNAs	NearbyGeneChrom	NearbyGeneStrand	NearbyGenetxStart	NearbyGenetxEnd
ENST00000412427	RP11-380J14.1	-2.3401	-1.22657	2.3401	down	Ensembl	4676	chr1	+	17516277	17524112	upstream	NM_014675	CROCC	rootletin	-4.16085	-2.05688	4.16085	down	chr1	+	17248444	17299474
ENST00000412427	RP11-380J14.1	-2.3401	-1.22657	2.3401	down	Ensembl	4676	chr1	+	17516277	17524112	downstream	NM_016233	PADI3	protein-arginine deiminase type-3	-6.24895	-2.64361	6.24895	down	chr1	+	17575592	17610727
uc002khh.2	LOC388312	2.6826	1.42363	2.6826	up	UCSC_knowngene	4812	chr1	-	661139	679736	downstream	NM_001005221	OR4F29	olfactory receptor 4F3/4F16/4F29	-2.15146	-1.10532	2.15146	down	chr1	+	367658	368597
uc002khh.2	LOC388312	2.6826	1.42363	2.6826	up	UCSC_knowngene	4812	chr1	-	661139	679736	upstream	NM_198576	AGRN	agrin precursor	2.66856	1.41606	2.66856	up	chr1	+	955502	991492
NR_026790	HCG11	2.32	1.21412	2.32	up	RefSeq_NR	5688	chr6	+	26521933	26527610	upstream	NM_003532	HIST1H3E	histone H3.1	4.8126	2.26682	4.8126	up	chr6	+	26225382	26225844
NR_026790	HCG11	2.32	1.21412	2.32	up	RefSeq_NR	5688	chr6	+	26521933	26527610	upstream	NM_003524	HIST1H2BH	histone H2B type 1-H	7.80952	2.96523	7.80952	up	chr6	+	26251878	26252303
ENST00000434868	RP1-90L6.2	-11.3435	-3.50379	11.3435	down	Ensembl	6043	chr22	+	27254596	27261749	upstream	NM_001886	CRYBA4	beta-crystallin A4	-2.76393	-1.46672	2.76393	down	chr22	+	27017927	27026636
ENST00000450248	TUG1	3.13206	1.64711	3.13206	up	Ensembl	6477	chr22	+	31365642	31374831	downstream	NM_134269	SMTN	smoothelin isoform b	3.08757	1.62647	3.08757	up	chr22	+	31477304	31500609
ENST00000450248	TUG1	3.13206	1.64711	3.13206	up	Ensembl	6477	chr22	+	31365642	31374831	downstream	NM_134270	SMTN	smoothelin isoform a	2.56886	1.36113	2.56886	up	chr22	+	31477304	31500609
ENST00000449605	RP11-147O5.1	-2.23773	-1.16204	2.23773	down	Ensembl	7619	chrX	+	21911717	21920026	upstream	NM_014927	CNKSR2	connector enhancer of kinase suppressor of ras 2	-29.7716	-4.89586	29.7716	down	chrX	+	21392535	21672813
uc003ojj.2	CR624291	-2.02007	-1.01441	2.02007	down	UCSC_knowngene	2513	chr6	-	34247456	34249969	upstream	NM_012391	SPDEF	SAM pointed domain-containing Ets transcription	-2.90147	-1.53678	2.90147	down	chr6	-	34505579	34524091
ENST00000454935	C10orf75	2.09885	1.0696	2.09885	up	Ensembl	2551	chr10	+	102133371	102143125	upstream	NM_001308	CPN1	carboxypeptidase N catalytic chain precursor	3.47382	1.79652	3.47382	up	chr10	-	101802064	101841642
ENST00000454935	C10orf75	2.09885	1.0696	2.09885	up	Ensembl	2551	chr10	+	102133371	102143125	upstream	NM_018294	CWF19L1	CWF19-like protein 1	2.46663	1.30254	2.46663	up	chr10	-	101992054	102027437
AB073661		2.12816	1.0896	2.12816	up	NRED	2686	chr22	+	31371385	31374065	downstream	NM_001002837	INPP5J	phosphatidylinositol 4,5-bisphosphate	2.27461	1.18562	2.27461	up	chr22	+	31518960	31530683
ENST00000433673	AC068282.3	8.11318	3.02027	8.11318	up	Ensembl	2690	chr2	+	128146705	128158156	upstream	NM_006609	MAP3K2	mitogen-activated protein kinase kinase kinase	2.3606	1.23915	2.3606	up	chr2	-	128062138	128100770
uc001hwe.2	BC040195	-7.82893	-2.96882	7.82893	down	UCSC_knowngene	2856	chr1	-	234663637	234667522	downstream	NM_173508	SLC35F3	solute carrier family 35 member F3	-2.22367	-1.15294	2.22367	down	chr1	+	234040678	234460262
ENST00000417443	NCRNA00086	-3.45732	-1.78965	3.45732	down	Ensembl	2913	chrX	+	134555867	134559682	downstream	NM_182540	DDX26B	protein DDX26B	-2.21826	-1.14943	2.21826	down	chrX	+	134654554	134716460
ENST00000450520	RP11-216M21.7	-2.19778	-1.13604	2.19778	down	Ensembl	3200	chr9	-	42363047	42367092	upstream	NM_001012421	ANKRD20A2	ankyrin repeat domain 20 family, member A2	6.97785	2.80278	6.97785	up	chr9	+	42368302	42411410
ENST00000447720	KB-1183D5.13	-7.19316	-2.84662	7.19316	down	Ensembl	3215	chr22	-	21655278	21679331	downstream	NM_005446	P2RX6	P2X purinoceptor 6 isoform 1	-2.20639	-1.14169	2.20639	down	chr22	+	21369463	21382302
ENST00000447720	KB-1183D5.13	-7.19316	-2.84662	7.19316	down	Ensembl	3215	chr22	-	21655278	21679331	upstream	NM_001128635	RIMBP3B	RIMS-binding protein 3B	-3.91713	-1.9698	3.91713	down	chr22	+	21738039	21743455
uc002nzf.1	AK128099	-2.25281	-1.17172	2.25281	down	UCSC_knowngene	3312	chr19	+	35896508	35907742	upstream	NM_139284	LGI4	leucine-rich repeat LGI family member 4	-3.11258	-1.63811	3.11258	down	chr19	-	35615416	35626178
uc002nzf.1	AK128099	-2.25281	-1.17172	2.25281	down	UCSC_knowngene	3312	chr19	+	35896508	35907742	upstream	NM_022006	FXYD7	FXYD domain-containing ion transport regulator	-14.3011	-3.83806	14.3011	down	chr19	+	35634153	35645205
NR_033370	LOC63930	-3.04418	-1.60605	3.04418	down	RefSeq_NR	3366	chr20	+	61640734	61716423	upstream	NM_002531	NTSR1	neurotensin receptor type 1	-2.08221	-1.05812	2.08221	down	chr20	+	61340188	61394123
NR_033370	LOC63930	-3.04418	-1.60605	3.04418	down	RefSeq_NR	3366	chr20	+	61640734	61716423	upstream	NM_001853	COL9A3	collagen alpha-3(IX) chain precursor	-3.96804	-1.98843	3.96804	down	chr20	+	61448413	61472511
uc002qgt.1	BC131616	-2.53557	-1.34231	2.53557	down	UCSC_knowngene	2014	chr19	+	55219699	55224842	upstream	NM_006863	LILRA1	leukocyte immunoglobulin-like receptor subfamily	-2.10926	-1.07673	2.10926	down	chr19	+	55105112	55112540
uc004aiu.1	AK095210	-2.99213	-1.58117	2.99213	down	UCSC_knowngene	2078	chr9	+	74920351	74958126	upstream	NM_004293	GDA	guanine deaminase isoform b	2.7816	1.47591	2.7816	up	chr9	+	74764292	74867140
uc002sdy.1	AK123766	-51.4763	-5.68584	51.4763	down	UCSC_knowngene	2100	chr2	-	67350488	67442451	upstream	NM_019002	ETAA1	ewing's tumor-associated antigen 1	3.76421	1.91235	3.76421	up	chr2	+	67624441	67637533
NR_026951	C17orf44	-3.2629	-1.70615	3.2629	down	RefSeq_NR	2115	chr17	-	8123948	8127361	downstream	NM_004732	KCNAB3	voltage-gated potassium channel subunit beta-3	-2.92036	-1.54614	2.92036	down	chr17	-	7826026	7832753
NR_026951	C17orf44	-3.2629	-1.70615	3.2629	down	RefSeq_NR	2115	chr17	-	8123948	8127361	upstream	NM_001177802	RANGRF	ran guanine nucleotide release factor isoform C	-2.30602	-1.2054	2.30602	down	chr17	+	8191968	8193409
NR_026951	C17orf44	-3.2629	-1.70615	3.2629	down	RefSeq_NR	2115	chr17	-	8123948	8127361	upstream	NM_001146684	RNF222	RING finger protein 222	-14.7693	-3.88453	14.7693	down	chr17	-	8294022	8301144
AK024410		6.11716	2.61286	6.11716	up	NRED	2133	chr20	-	37038939	37041070	upstream	NM_001018082	ADIG	adipogenin	-2.01468	-1.01055	2.01468	down	chr20	+	37209837	37217104
ENST00000430364	XXbac-BPG181B23.4	3.35162	1.74486	3.35162	up	Ensembl	2141	chr6	+	31409443	31414750	downstream	NM_001011700	MCCD1	mitochondrial coiled-coil domain protein 1	-3.75373	-1.90832	3.75373	down	chr6	+	31496738	31498008
ENST00000430364	XXbac-BPG181B23.4	3.35162	1.74486	3.35162	up	Ensembl	2141	chr6	+	31409443	31414750	downstream	NM_000594	TNF	tumor necrosis factor	-8.31243	-3.05527	8.31243	down	chr6	+	31543349	31546112
ENST00000430364	XXbac-BPG181B23.4	3.35162	1.74486	3.35162	up	Ensembl	2141	chr6	+	31409443	31414750	downstream	NM_205837	LST1	leukocyte-specific transcript 1 protein isoform	-3.74995	-1.90687	3.74995	down	chr6	+	31554475	31556686
ENST00000430364	XXbac-BPG181B23.4	3.35162	1.74486	3.35162	up	Ensembl	2141	chr6	+	31409443	31414750	downstream	NM_147130	NCR3	natural cytotoxicity triggering receptor 3	-7.85305	-2.97325	7.85305	down	chr6	-	31556659	31560762
NR_015447	LOC153684	-2.61403	-1.38628	2.61403	down	RefSeq_NR	2261	chr5	+	43042235	43045370	downstream	NM_003432	ZNF131	zinc finger protein 131	4.77552	2.25566	4.77552	up	chr5	+	43121641	43175823
ENST00000439050	AC009299.3	-12.7691	-3.67459	12.7691	down	Ensembl	2333	chr2	+	162101249	162105561	upstream	NM_133484	TANK	TRAF family member-associated NF-kappa-B	2.11578	1.08119	2.11578	up	chr2	+	161993465	162061490
ENST00000439050	AC009299.3	-12.7691	-3.67459	12.7691	down	Ensembl	2333	chr2	+	162101249	162105561	upstream	NM_004180	TANK	TRAF family member-associated NF-kappa-B	2.53476	1.34185	2.53476	up	chr2	+	161993465	162092682
ENST00000399543	AC025171.1	-2.12811	-1.08957	2.12811	down	Ensembl	2423	chr5	+	43042194	43045492	downstream	NM_003432	ZNF131	zinc finger protein 131	4.77552	2.25566	4.77552	up	chr5	+	43121641	43175823
ENST00000420171	RP1-149A16.3	2.14748	1.10265	2.14748	up	Ensembl	1558	chr22	+	32772650	32780330	upstream	NM_001159546	RFPL2	ret finger protein-like 2 isoform 3	-3.60302	-1.84921	3.60302	down	chr22	-	32586421	32598537
NR_026883	HSPC072	2.29031	1.19554	2.29031	up	RefSeq_NR	1574	chr20	-	18768614	18775228	downstream	NM_006363	SEC23B	protein transport protein Sec23B isoform 1	2.03988	1.02848	2.03988	up	chr20	+	18488187	18542050
NR_024464	LOC100188949	-5.75344	-2.52442	5.75344	down	RefSeq_NR	1589	chr13	-	30914408	30948036	upstream	NM_005800	USPL1	ubiquitin-specific peptidase-like protein 1	2.27962	1.1888	2.27962	up	chr13	+	31191829	31233686
NR_027036	LOC100271722	-4.37303	-2.12863	4.37303	down	RefSeq_NR	1625	chr22	-	46435788	46440748	downstream	NM_001167621	ATXN10	ataxin-10 isoform 2	3.13241	1.64727	3.13241	up	chr22	+	46067677	46241187
uc003qiq.1	AK123801	2.03174	1.02272	2.03174	up	UCSC_knowngene	1690	chr6	-	139790131	139795733	downstream	NM_006079	CITED2	cbp/p300-interacting transactivator 2	6.66362	2.73631	6.66362	up	chr6	-	139693396	139695785
ENST00000421320	RP11-124O11.1	-2.01981	-1.01422	2.01981	down	Ensembl	1714	chr10	+	43366968	43369508	downstream	NM_020975	RET	proto-oncogene tyrosine-protein kinase receptor	-6.32064	-2.66007	6.32064	down	chr10	+	43572516	43625797
ENST00000421320	RP11-124O11.1	-2.01981	-1.01422	2.01981	down	Ensembl	1714	chr10	+	43366968	43369508	downstream	NM_018590	CSGALNACT2	chondroitin sulfate	3.04318	1.60558	3.04318	up	chr10	+	43633933	43680749
NR_033376	NCRNA00222	-2.79082	-1.48069	2.79082	down	RefSeq_NR	1753	chr6	+	109072856	109091145	downstream	NM_032131	ARMC2	armadillo repeat-containing protein 2	-8.82421	-3.14147	8.82421	down	chr6	+	109169618	109295352
ENST00000458084	NCRNA00202	-2.57424	-1.36415	2.57424	down	Ensembl	1787	chr10	-	27220134	27226788	upstream	NM_014915	ANKRD26	ankyrin repeat domain-containing protein 26	2.76936	1.46955	2.76936	up	chr10	-	27293044	27389427
uc011djk.1	FLJ22536	3.58804	1.84319	3.58804	up	UCSC_knowngene	1806	chr6	+	21668877	22194614	upstream	NM_003107	SOX4	transcription factor SOX-4	4.1441	2.05106	4.1441	up	chr6	+	21593971	21598849
ENST00000416805	RP11-413E1.3	-2.14641	-1.10192	2.14641	down	Ensembl	1835	chr1	+	90229103	90235462	downstream	NM_182975	ZNF326	zinc finger protein 326 isoform 3	3.13748	1.64961	3.13748	up	chr1	+	90460677	90472000
ENST00000416805	RP11-413E1.3	-2.14641	-1.10192	2.14641	down	Ensembl	1835	chr1	+	90229103	90235462	downstream	NM_182976	ZNF326	zinc finger protein 326 isoform 1	3.86555	1.95067	3.86555	up	chr1	+	90460677	90494094
ENST00000413005	RP1-79C4.1	2.47024	1.30465	2.47024	up	Ensembl	1923	chr1	+	170567994	170616480	upstream	NM_001146039	GORAB	RAB6-interacting golgin isoform b	3.4795	1.79888	3.4795	up	chr1	+	170501262	170514929
ENST00000413005	RP1-79C4.1	2.47024	1.30465	2.47024	up	Ensembl	1923	chr1	+	170567994	170616480	downstream	NM_006902	PRRX1	paired mesoderm homeobox protein 1 isoform	17.2134	4.10546	17.2134	up	chr1	+	170633312	170708541
ENST00000326734	FAM87B	5.22104	2.38434	5.22104	up	Ensembl	1944	chr1	+	752750	755214	downstream	NM_198576	AGRN	agrin precursor	2.66856	1.41606	2.66856	up	chr1	+	955502	991492
uc001aio.1	AK054708	-3.48259	-1.80016	3.48259	down	UCSC_knowngene	1954	chr1	-	1944651	1946969	downstream	NM_033489	CDK11B	cyclin-dependent kinase 11B isoform 5	4.32934	2.11415	4.32934	up	chr1	-	1571099	1655775
uc001aio.1	AK054708	-3.48259	-1.80016	3.48259	down	UCSC_knowngene	1954	chr1	-	1944651	1946969	downstream	NM_001080484	KIAA1751	hypothetical protein LOC85452	-19.0673	-4.25303	19.0673	down	chr1	-	1884751	1935276
AK055023		-2.17197	-1.11901	2.17197	down	misc_RNA	1974	chr10	-	72689681	72695453	downstream	NM_080722	ADAMTS14	A disintegrin and metalloproteinase with	6.77348	2.7599	6.77348	up	chr10	+	72432558	72522195
ENST00000423943	RP11-48O20.4	-8.21441	-3.03816	8.21441	down	Ensembl	1113	chr1	+	159931013	159948851	upstream	NM_003564	TAGLN2	transgelin-2	5.35192	2.42006	5.35192	up	chr1	-	159887902	159895284
NR_026793	C10orf50	-2.26373	-1.1787	2.26373	down	RefSeq_NR	1117	chr10	+	26878793	26883249	upstream	NM_019043	APBB1IP	amyloid beta A4 precursor protein-binding family	-5.01326	-2.32575	5.01326	down	chr10	+	26727265	26856732
NR_026793	C10orf50	-2.26373	-1.1787	2.26373	down	RefSeq_NR	1117	chr10	+	26878793	26883249	downstream	NM_014317	PDSS1	decaprenyl-diphosphate synthase subunit 1	4.95875	2.30998	4.95875	up	chr10	+	26986594	27035726
ENST00000417705	RP11-54O7.3	-16.0773	-4.00696	16.0773	down	Ensembl	1389	chr1	-	852249	855072	upstream	NM_152486	SAMD11	sterile alpha motif domain-containing protein	-6.92436	-2.79168	6.92436	down	chr1	+	861120	879961
ENST00000417705	RP11-54O7.3	-16.0773	-4.00696	16.0773	down	Ensembl	1389	chr1	-	852249	855072	upstream	NM_198576	AGRN	agrin precursor	2.66856	1.41606	2.66856	up	chr1	+	955502	991492
ENST00000433572	RP11-542K23.7	-2.64209	-1.40168	2.64209	down	Ensembl	830	chr9	+	125165685	125211256	upstream	NM_198469	MORN5	MORN repeat-containing protein 5	-574.441	-9.16601	574.441	down	chr9	+	124922189	124962367
ENST00000433572	RP11-542K23.7	-2.64209	-1.40168	2.64209	down	Ensembl	830	chr9	+	125165685	125211256	upstream	NM_001173512	MRRF	ribosome-recycling factor, mitochondrial isoform	2.18466	1.12741	2.18466	up	chr9	+	125026881	125085742
ENST00000417636	RP5-857K21.1	3.90401	1.96496	3.90401	up	Ensembl	842	chr1	-	521368	523833	downstream	NM_001005221	OR4F29	olfactory receptor 4F3/4F16/4F29	-2.15146	-1.10532	2.15146	down	chr1	+	367658	368597
uc002tkz.1	CR601322	-2.73299	-1.45048	2.73299	down	UCSC_knowngene	844	chr2	+	114737145	114764879	upstream	NM_025181	SLC35F5	solute carrier family 35 member F5	2.04275	1.03051	2.04275	up	chr2	-	114471932	114514400
ENST00000415195	XXbac-BPG249D20.9	-4.65128	-2.21763	4.65128	down	Ensembl	851	chr6	+	30484042	30486994	downstream	NM_001090	ABCF1	ATP-binding cassette sub-family F member 1	2.49824	1.32091	2.49824	up	chr6	+	30539169	30559309
uc001hwk.3	BC016972	-2.98434	-1.57741	2.98434	down	UCSC_knowngene	886	chr1	-	235093091	235099746	upstream	NM_001161533	RBM34	RNA-binding protein 34 isoform 2	3.23986	1.69593	3.23986	up	chr1	-	235315802	235324571
ENST00000414407	RP11-469L23.2	-3.46672	-1.79357	3.46672	down	Ensembl	906	chr13	+	31377342	31384782	downstream	NM_152325	C13orf26	hypothetical protein LOC122046	-47.9118	-5.58231	47.9118	down	chr13	+	31506833	31549153
ENST00000449713	AP001065.15	-2.28684	-1.19336	2.28684	down	Ensembl	912	chr21	+	45905459	45910171	upstream	NM_013369	DNMT3L	DNA (cytosine-5)-methyltransferase 3-like	100.029	6.64428	100.029	up	chr21	-	45666222	45682099
ENST00000449713	AP001065.15	-2.28684	-1.19336	2.28684	down	Ensembl	912	chr21	+	45905459	45910171	downstream	NM_198691	KRTAP10-1	keratin-associated protein 10-1	-3.81108	-1.9302	3.81108	down	chr21	-	45959067	45960078
ENST00000449713	AP001065.15	-2.28684	-1.19336	2.28684	down	Ensembl	912	chr21	+	45905459	45910171	downstream	NM_198690	KRTAP10-9	keratin-associated protein 10-9	-3.13377	-1.6479	3.13377	down	chr21	+	46047039	46048295
ENST00000449713	AP001065.15	-2.28684	-1.19336	2.28684	down	Ensembl	912	chr21	+	45905459	45910171	downstream	NM_181688	KRTAP10-10	keratin-associated protein 10-10	3.00018	1.58505	3.00018	up	chr21	+	46057272	46058372
ENST00000457725	AP003774.6	-4.54515	-2.18433	4.54515	down	Ensembl	985	chr11	-	64161813	64163303	downstream	NM_001039496	C11orf20	hypothetical protein LOC25858	-3.44154	-1.78305	3.44154	down	chr11	+	64067862	64072239
ENST00000457725	AP003774.6	-4.54515	-2.18433	4.54515	down	Ensembl	985	chr11	-	64161813	64163303	downstream	NM_001006944	RPS6KA4	ribosomal protein S6 kinase alpha-4 isoform b	2.53873	1.3441	2.53873	up	chr11	+	64126624	64139687
ENST00000451101	AC019172.2	-12.1661	-3.6048	12.1661	down	Ensembl	717	chr2	+	3891773	3895001	upstream	NM_001011	RPS7	40S ribosomal protein S7	4.83264	2.27281	4.83264	up	chr2	+	3622852	3628509
ENST00000418612	AC051649.6	-2.06162	-1.04378	2.06162	down	Ensembl	722	chr11	+	2012325	2014699	upstream	NM_006757	TNNT3	troponin T, fast skeletal muscle isoform 1	-3.88757	-1.95887	3.88757	down	chr11	+	1940798	1959936
ENST00000450860	RP5-1091N2.9	-5.12651	-2.35798	5.12651	down	Ensembl	726	chrX	-	70403408	70418025	downstream	NM_013346	SNX12	sorting nexin-12	2.59266	1.37443	2.59266	up	chrX	-	70280787	70288231
ENST00000450860	RP5-1091N2.9	-5.12651	-2.35798	5.12651	down	Ensembl	726	chrX	-	70403408	70418025	upstream	NM_007363	NONO	non-POU domain-containing octamer-binding	5.17929	2.37275	5.17929	up	chrX	+	70503041	70521018
ENST00000367276	C9orf44	2.53056	1.33946	2.53056	up	Ensembl	738	chr9	+	94903579	94910588	upstream	NM_006415	SPTLC1	serine palmitoyltransferase 1 isoform a	2.1702	1.11783	2.1702	up	chr9	-	94793426	94877690
ENST00000442214	AC104654.1	3.34686	1.74281	3.34686	up	Ensembl	741	chr2	+	42104695	42120186	downstream	NM_001145076	EML4	echinoderm microtubule-associated protein-like 4	4.36114	2.12471	4.36114	up	chr2	+	42396489	42559688
ENST00000449954	AL078621.3	-7.75158	-2.95449	7.75158	down	Ensembl	745	chr2	+	114270039	114273062	downstream	NM_007082	RABL2A	rab-like protein 2A	-3.10522	-1.6347	3.10522	down	chr2	+	114384816	114400975
ENST00000449954	AL078621.3	-7.75158	-2.95449	7.75158	down	Ensembl	745	chr2	+	114270039	114273062	downstream	NM_025181	SLC35F5	solute carrier family 35 member F5	2.04275	1.03051	2.04275	up	chr2	-	114471932	114514400
ENST00000423045	AL133492.3	-2.3583	-1.23775	2.3583	down	Ensembl	749	chr21	+	47170541	47172900	upstream	NM_194255	SLC19A1	folate transporter 1 isoform 1	3.34113	1.74034	3.34113	up	chr21	-	46934628	46962385
ENST00000437920	RP1-148H17.1	-6.12168	-2.61393	6.12168	down	Ensembl	750	chr20	-	46020672	46041071	downstream	NM_005244	EYA2	eyes absent homolog 2 isoform a	-2.67337	-1.41866	2.67337	down	chr20	+	45523262	45817492
ENST00000412357	RP5-1114G22.2	-2.27395	-1.1852	2.27395	down	Ensembl	775	chr1	-	175172363	175173985	downstream	NM_014656	KIAA0040	hypothetical protein LOC9674	-2.58344	-1.3693	2.58344	down	chr1	-	175126122	175161949
ENST00000412772	RP11-134P9.3	-2.66897	-1.41628	2.66897	down	Ensembl	775	chr1	+	203256279	203257929	upstream	NM_004997	MYBPH	myosin-binding protein H	3.26293	1.70617	3.26293	up	chr1	-	203136938	203144942
ENST00000412772	RP11-134P9.3	-2.66897	-1.41628	2.66897	down	Ensembl	775	chr1	+	203256279	203257929	upstream	NM_003465	CHIT1	chitotriosidase-1 precursor	3.16389	1.6617	3.16389	up	chr1	-	203185206	203198860
ENST00000450820	RP11-335G20.5	-2.11651	-1.08169	2.11651	down	Ensembl	777	chr1	-	25579797	25594376	upstream	NM_015627	LDLRAP1	low density lipoprotein receptor adapter protein	-6.17661	-2.62681	6.17661	down	chr1	+	25870075	25895377
ENST00000439041	AC061992.2	-2.39233	-1.25842	2.39233	down	Ensembl	799	chr17	+	76311809	76343879	upstream	NM_004710	SYNGR2	synaptogyrin-2	2.83932	1.50555	2.83932	up	chr17	+	76164670	76169009
ENST00000414488	AL132709.5	3.08287	1.62427	3.08287	up	Ensembl	800	chr14	+	101415314	101424887	upstream	NM_001134888	RTL1	retrotransposon-like protein 1	-2.25884	-1.17558	2.25884	down	chr14	-	101346991	101351184
ENST00000451118	WI2-85898F10.1	-3.41186	-1.77056	3.41186	down	Ensembl	805	chr22	-	46271878	46283628	downstream	NM_006486	FBLN1	fibulin-1 isoform D precursor	2.42617	1.27868	2.42617	up	chr22	+	45898718	45997014
ENST00000451118	WI2-85898F10.1	-3.41186	-1.77056	3.41186	down	Ensembl	805	chr22	-	46271878	46283628	downstream	NM_013236	ATXN10	ataxin-10 isoform 1	2.39964	1.26282	2.39964	up	chr22	+	46067677	46241187
ENST00000457157	AP000688.8	-12.9126	-3.6907	12.9126	down	Ensembl	811	chr21	+	37377635	37379899	downstream	NM_001236	CBR3	carbonyl reductase [NADPH] 3	-2.07928	-1.05608	2.07928	down	chr21	+	37507262	37518860
ENST00000433081	RP11-458D21.1	2.22367	1.15295	2.22367	up	Ensembl	814	chr1	-	145376124	145382397	upstream	NM_144698	ANKRD35	ankyrin repeat domain-containing protein 35	-14.5041	-3.85839	14.5041	down	chr1	+	145549208	145568526
ENST00000435421	RP11-143M1.3	-5.8726	-2.554	5.8726	down	Ensembl	612	chr9	-	100803	102850	upstream	NM_203447	DOCK8	dedicator of cytokinesis protein 8 isoform 1	-2.92229	-1.5471	2.92229	down	chr9	+	214864	465259
ENST00000430519	RP11-476B1.1	-2.71522	-1.44107	2.71522	down	Ensembl	621	chr1	-	196014125	196030203	upstream	NM_198503	KCNT2	potassium channel subfamily T member 2	3.9641	1.98699	3.9641	up	chr1	-	196194912	196577499
ENST00000442197	AL132709.9	3.57714	1.83881	3.57714	up	Ensembl	625	chr14	+	101427363	101433377	upstream	NM_001134888	RTL1	retrotransposon-like protein 1	-2.25884	-1.17558	2.25884	down	chr14	-	101346991	101351184
ENST00000455390	RP11-514O12.2	-2.37345	-1.24699	2.37345	down	Ensembl	627	chr6	+	167317185	167318323	upstream	NM_001006932	RPS6KA2	ribosomal protein S6 kinase alpha-2 isoform b	-4.23372	-2.08193	4.23372	down	chr6	-	166822853	167275771
ENST00000450928	AP000302.58	-2.84177	-1.50679	2.84177	down	Ensembl	666	chr21	-	34854805	34856565	downstream	NM_207584	IFNAR2	interferon alpha/beta receptor 2 isoform b	-2.80777	-1.48943	2.80777	down	chr21	+	34602230	34635062
ENST00000437892	RP11-124L5.7	-2.12237	-1.08568	2.12237	down	Ensembl	674	chr10	+	86039746	86048751	upstream	NM_033100	CDHR1	cadherin-related family member 1 isoform 1	-3.28108	-1.71417	3.28108	down	chr10	+	85954411	85977121
ENST00000450671	RP3-475N16.1	-2.19809	-1.13625	2.19809	down	Ensembl	679	chr6	+	42908101	42911708	downstream	NM_152882	PTK7	inactive tyrosine-protein kinase 7 isoform d	3.03994	1.60404	3.03994	up	chr6	+	43044028	43129457
ENST00000449457	RP11-445P17.8	-2.79428	-1.48248	2.79428	down	Ensembl	692	chr10	-	5307995	5313199	upstream	NM_017422	CALML5	calmodulin-like protein 5	-8.2522	-3.04478	8.2522	down	chr10	-	5540657	5541533
ENST00000447883	RP11-277L2.3	-2.82253	-1.49699	2.82253	down	Ensembl	561	chr1	-	149576590	149577296	upstream	NM_001040874	HIST2H2AA4	histone H2A type 2-A	-3.17054	-1.66473	3.17054	down	chr1	+	149822627	149823161
ENST00000424421	RP1-111D6.2	-3.59146	-1.84457	3.59146	down	Ensembl	562	chr6	-	149564434	149565137	upstream	NM_001002255	SUMO4	small ubiquitin-related modifier 4 precursor	2.19886	1.13675	2.19886	up	chr6	+	149721494	149722182
ENST00000443747	RP11-164D18.2	-3.82658	-1.93606	3.82658	down	Ensembl	566	chr20	+	58090245	58091094	downstream	NM_183244	PHACTR3	phosphatase and actin regulator 3 isoform 2	2.56376	1.35826	2.56376	up	chr20	+	58296264	58422766
ENST00000443303	RP3-523C21.1	-14.3199	-3.83995	14.3199	down	Ensembl	569	chr6	+	132455550	132490514	upstream	NM_006208	ENPP1	ectonucleotide pyrophosphatase/phosphodiesterase	-2.48234	-1.3117	2.48234	down	chr6	+	132129155	132216295
ENST00000417932	RP11-10J5.1	4.4785	2.16302	4.4785	up	Ensembl	573	chr6	-	138264215	138266939	downstream	NM_006290	TNFAIP3	tumor necrosis factor alpha-induced protein 3	2.31213	1.20922	2.31213	up	chr6	+	138188580	138204449
ENST00000454185	RP11-568A7.3	-45.1623	-5.49705	45.1623	down	Ensembl	579	chr6	-	167650995	167653968	downstream	NM_004367	CCR6	C-C chemokine receptor type 6	-2.53875	-1.34412	2.53875	down	chr6	+	167525294	167552629
ENST00000437830	XX-CR54.1	-2.73388	-1.45095	2.73388	down	Ensembl	580	chr1	+	248855491	248862411	upstream	NM_001013355	OR2G6	olfactory receptor 2G6	-4.73764	-2.24417	4.73764	down	chr1	+	248684947	248685898
uc003zfy.2	AY343902	-3.37304	-1.75405	3.37304	down	UCSC_knowngene	581	chr9	-	100994	102941	upstream	NM_203447	DOCK8	dedicator of cytokinesis protein 8 isoform 1	-2.92229	-1.5471	2.92229	down	chr9	+	214864	465259
ENST00000452181	RP1-90G24.6	-5.01891	-2.32737	5.01891	down	Ensembl	590	chr22	+	32669406	32673173	upstream	NM_006605	RFPL2	ret finger protein-like 2 isoform 1	-4.69842	-2.23218	4.69842	down	chr22	-	32586421	32589466
ENST00000424436	RP4-742C19.12	-2.13589	-1.09484	2.13589	down	Ensembl	592	chr22	+	39487638	39488860	upstream	NM_004900	APOBEC3B	probable DNA dC->dU-editing enzyme APOBEC-3B	3.31748	1.73009	3.31748	up	chr22	+	39378404	39388783
ENST00000424436	RP4-742C19.12	-2.13589	-1.09484	2.13589	down	Ensembl	592	chr22	+	39487638	39488860	downstream	NM_145731	SYNGR1	synaptogyrin-1 isoform 1b	-3.49117	-1.80371	3.49117	down	chr22	+	39745953	39774394
ENST00000424436	RP4-742C19.12	-2.13589	-1.09484	2.13589	down	Ensembl	592	chr22	+	39487638	39488860	downstream	NM_004711	SYNGR1	synaptogyrin-1 isoform 1a	-10.0659	-3.3314	10.0659	down	chr22	+	39745953	39781593
ENST00000457720	RP11-217B7.3	2.59522	1.37585	2.59522	up	Ensembl	606	chr9	-	107753076	107754062	downstream	NM_018376	NIPSNAP3B	protein NipSnap homolog 3B	-4.24536	-2.08589	4.24536	down	chr9	+	107526450	107536291
ENST00000424705	RP3-461P17.10	-3.18597	-1.67173	3.18597	down	Ensembl	514	chr20	+	44076041	44076982	upstream	NM_002638	PI3	elafin preproprotein	-105.568	-6.72203	105.568	down	chr20	+	43803539	43805185
ENST00000424705	RP3-461P17.10	-3.18597	-1.67173	3.18597	down	Ensembl	514	chr20	+	44076041	44076982	upstream	NM_003064	SLPI	antileukoproteinase precursor	-226.866	-7.82569	226.866	down	chr20	-	43880878	43883206
ENST00000424705	RP3-461P17.10	-3.18597	-1.67173	3.18597	down	Ensembl	514	chr20	+	44076041	44076982	downstream	NM_006652	SPINT3	kunitz-type protease inhibitor 3 precursor	-2.4729	-1.3062	2.4729	down	chr20	-	44141100	44144264
ENST00000424705	RP3-461P17.10	-3.18597	-1.67173	3.18597	down	Ensembl	514	chr20	+	44076041	44076982	downstream	NM_178455	SPINT4	kunitz-type protease inhibitor 4 precursor	-3.8324	-1.93825	3.8324	down	chr20	+	44350987	44354335
ENST00000456082	RP11-478H13.1	4.27625	2.09635	4.27625	up	Ensembl	517	chr10	+	29032673	29033592	upstream	NM_016628	WAC	WW domain-containing adapter protein with	2.20219	1.13894	2.20219	up	chr10	+	28822423	28909923
ENST00000422253	RP5-968D22.3	-2.25925	-1.17584	2.25925	down	Ensembl	519	chr1	-	168433451	168464882	downstream	NM_152902	TIPRL	TIP41-like protein isoform 1	3.57204	1.83675	3.57204	up	chr1	+	168148170	168171351
ENST00000444862	AP005273.1	-4.03294	-2.01183	4.03294	down	Ensembl	522	chr11	+	64268324	64272858	upstream	NM_001177358	GPR137	integral membrane protein GPR137 isoform 5	2.07738	1.05476	2.07738	up	chr11	+	64052282	64056972
ENST00000444862	AP005273.1	-4.03294	-2.01183	4.03294	down	Ensembl	522	chr11	+	64268324	64272858	downstream	NM_153378	SLC22A12	solute carrier family 22 member 12 isoform b	-2.99777	-1.58389	2.99777	down	chr11	+	64358281	64369820
ENST00000442712	RP11-439E19.7	-2.68417	-1.42448	2.68417	down	Ensembl	522	chr1	+	246853348	246855123	downstream	NM_020394	ZNF695	zinc finger protein 695 isoform 1	10.0997	3.33624	10.0997	up	chr1	-	247148624	247171395
ENST00000440397	RP11-95M15.1	47.3975	5.56674	47.3975	up	Ensembl	523	chr6	+	137994596	137995691	downstream	NM_006290	TNFAIP3	tumor necrosis factor alpha-induced protein 3	2.31213	1.20922	2.31213	up	chr6	+	138188580	138204449
ENST00000441085	RP11-98G7.1	4.30922	2.10743	4.30922	up	Ensembl	523	chr1	-	156416203	156426258	downstream	NM_198406	PAQR6	progestin and adipoQ receptor family member 6	2.11992	1.08401	2.11992	up	chr1	-	156213208	156217792
ENST00000441085	RP11-98G7.1	4.30922	2.10743	4.30922	up	Ensembl	523	chr1	-	156416203	156426258	upstream	NM_198427	BCAN	brevican core protein isoform 2	-5.60403	-2.48647	5.60403	down	chr1	+	156611739	156623264
ENST00000448282	RP1-102H19.6	5.66839	2.50294	5.66839	up	Ensembl	542	chr6	+	88081310	88102519	upstream	NM_015021	ZNF292	zinc finger protein 292	2.07223	1.05119	2.07223	up	chr6	+	87865268	87973406
ENST00000448282	RP1-102H19.6	5.66839	2.50294	5.66839	up	Ensembl	542	chr6	+	88081310	88102519	downstream	NM_001031743	C6orf165	hypothetical protein LOC154313	-37.6012	-5.23271	37.6012	down	chr6	+	88117689	88174191
ENST00000439823	AC002480.4	3.33087	1.7359	3.33087	up	Ensembl	557	chr7	+	22629323	22631241	downstream	NM_000600	IL6	interleukin-6 precursor	4.55336	2.18693	4.55336	up	chr7	+	22766765	22771621
ENST00000457239	RP11-71G12.1	-11.6018	-3.53627	11.6018	down	Ensembl	471	chr1	+	157155177	157157195	upstream	NM_144702	LRRC71	leucine-rich repeat-containing protein 71	-87.2922	-6.44778	87.2922	down	chr1	+	156890423	156902880
ENST00000434596	RP11-503C24.3	6.94407	2.79578	6.94407	up	Ensembl	473	chr6	+	168630411	168641395	upstream	NM_030615	KIF25	kinesin-like protein KIF25 isoform 1	-4.01402	-2.00505	4.01402	down	chr6	+	168418552	168445769
ENST00000412060	Z83851.1	-2.12601	-1.08815	2.12601	down	Ensembl	475	chr22	-	42760407	42765214	downstream	NM_181492	TCF20	transcription factor 20 isoform 2	2.49418	1.31857	2.49418	up	chr22	-	42556018	42611445
ENST00000412797	RP11-70P17.1	-10.3752	-3.37507	10.3752	down	Ensembl	483	chr1	+	25907968	25916847	downstream	NM_020379	MAN1C1	mannosyl-oligosaccharide 1,2-alpha-mannosidase	-2.20646	-1.14174	2.20646	down	chr1	+	25943958	26111258
ENST00000420876	RP11-511I2.2	-5.13677	-2.36086	5.13677	down	Ensembl	483	chr1	-	47846599	47874149	downstream	NM_001136140	CMPK1	UMP-CMP kinase isoform b	2.93616	1.55393	2.93616	up	chr1	+	47799468	47844511
ENST00000420876	RP11-511I2.2	-5.13677	-2.36086	5.13677	down	Ensembl	483	chr1	-	47846599	47874149	downstream	NM_016308	CMPK1	UMP-CMP kinase isoform a	2.06417	1.04556	2.06417	up	chr1	+	47799468	47844511
ENST00000446145	RP11-239E10.3	4.36284	2.12527	4.36284	up	Ensembl	487	chr1	+	223354485	223361496	upstream	NM_003268	TLR5	toll-like receptor 5 precursor	18.0814	4.17643	18.0814	up	chr1	-	223282747	223316624
ENST00000438829	RP11-413P11.1	-7.23944	-2.85588	7.23944	down	Ensembl	495	chr1	-	99937917	99999571	upstream	NM_017734	PALMD	palmdelphin	-6.88201	-2.78283	6.88201	down	chr1	+	100111430	100160097
uc001hpx.2	BC032899	2.89548	1.5338	2.89548	up	UCSC_knowngene	502	chr1	+	226271655	226277990	upstream	NM_003133	SRP9	signal recognition particle 9 kDa protein	3.4151	1.77193	3.4151	up	chr1	+	225965514	225978168
uc001hpx.2	BC032899	2.89548	1.5338	2.89548	up	UCSC_knowngene	502	chr1	+	226271655	226277990	downstream	NM_173083	LIN9	protein lin-9 homolog	20.0223	4.32354	20.0223	up	chr1	-	226418860	226497198
ENST00000414795	AC017076.5	3.26157	1.70557	3.26157	up	Ensembl	506	chr2	-	6969010	6980595	upstream	NM_080657	RSAD2	radical S-adenosyl methionine domain-containing	10.8114	3.43448	10.8114	up	chr2	+	7017795	7038363
ENST00000420210	RP11-374F3.4	-2.92166	-1.54679	2.92166	down	Ensembl	508	chr13	-	30915495	30941804	upstream	NM_005800	USPL1	ubiquitin-specific peptidase-like protein 1	2.27962	1.1888	2.27962	up	chr13	+	31191829	31233686
ENST00000422178	AC016745.3	-2.18838	-1.12986	2.18838	down	Ensembl	508	chr2	+	114182071	114182901	upstream	NM_173842	IL1RN	interleukin-1 receptor antagonist protein	-3.17736	-1.66783	3.17736	down	chr2	+	113885137	113891593
ENST00000422178	AC016745.3	-2.18838	-1.12986	2.18838	down	Ensembl	508	chr2	+	114182071	114182901	upstream	NM_012455	PSD4	PH and SEC7 domain-containing protein 4	-4.6675	-2.22265	4.6675	down	chr2	+	113931559	113960677
uc001fuu.2	AF088076	-3.16364	-1.66158	3.16364	down	UCSC_knowngene	423	chr1	+	159931073	159946734	downstream	NM_000702	ATP1A2	sodium/potassium-transporting ATPase subunit	-16.6071	-4.05373	16.6071	down	chr1	+	160085519	160113374
ENST00000455848	RP11-264J4.5	2.45736	1.29711	2.45736	up	Ensembl	431	chr13	+	20676839	20677369	downstream	NM_021954	GJA3	gap junction alpha-3 protein	-14.9891	-3.90584	14.9891	down	chr13	-	20712394	20735183
ENST00000415138	AC097495.2	-3.42742	-1.77712	3.42742	down	Ensembl	436	chr2	+	69059175	69064840	upstream	NM_173545	APLF	aprataxin and PNK-like factor	2.24034	1.16372	2.24034	up	chr2	+	68694690	68807294
ENST00000456537	AC004448.5	-2.22179	-1.15172	2.22179	down	Ensembl	441	chr17	-	19342455	19364048	downstream	NM_007148	RNF112	RING finger protein 112	-5.90989	-2.56313	5.90989	down	chr17	+	19314490	19320589
ENST00000440492	RP11-288L9.1	7.12534	2.83296	7.12534	up	Ensembl	441	chr1	-	27986838	27989233	upstream	NM_022872	IFI6	interferon alpha-inducible protein 6 isoform b	6.77006	2.75917	6.77006	up	chr1	-	27992571	27998724
ENST00000440492	RP11-288L9.1	7.12534	2.83296	7.12534	up	Ensembl	441	chr1	-	27986838	27989233	upstream	NM_018053	XKR8	XK-related protein 8	-2.045	-1.0321	2.045	down	chr1	+	28286503	28294604
ENST00000414875	RP1-153P14.5	-4.83615	-2.27386	4.83615	down	Ensembl	442	chr6	+	37517779	37518636	downstream	NM_021943	ZFAND3	AN1-type zinc finger protein 3	2.42155	1.27593	2.42155	up	chr6	+	37787306	38122399
ENST00000431997	RP1-288M22.2	2.63559	1.39813	2.63559	up	Ensembl	454	chr6	+	72160536	72168577	upstream	NM_024576	OGFRL1	opioid growth factor receptor-like protein 1	4.41749	2.14323	4.41749	up	chr6	+	71998476	72011973
ENST00000451438	RP11-168L22.2	-3.89492	-1.9616	3.89492	down	Ensembl	391	chr10	+	43819112	43823380	upstream	NM_020630	RET	proto-oncogene tyrosine-protein kinase receptor	-4.33697	-2.11669	4.33697	down	chr10	+	43572516	43622952
ENST00000451438	RP11-168L22.2	-3.89492	-1.9616	3.89492	down	Ensembl	391	chr10	+	43819112	43823380	upstream	NM_020975	RET	proto-oncogene tyrosine-protein kinase receptor	-6.32064	-2.66007	6.32064	down	chr10	+	43572516	43625797
ENST00000451438	RP11-168L22.2	-3.89492	-1.9616	3.89492	down	Ensembl	391	chr10	+	43819112	43823380	downstream	NM_001098205	HNRNPF	heterogeneous nuclear ribonucleoprotein F	-2.00102	-1.00074	2.00102	down	chr10	-	43881064	43904332
ENST00000451438	RP11-168L22.2	-3.89492	-1.9616	3.89492	down	Ensembl	391	chr10	+	43819112	43823380	downstream	NM_145312	ZNF485	zinc finger protein 485	2.32771	1.21891	2.32771	up	chr10	+	44101854	44113352
ENST00000418403	RP11-462G2.1	-2.7323	-1.45012	2.7323	down	Ensembl	397	chr6	+	71104589	71109120	downstream	NM_001105531	FAM135A	hypothetical protein LOC57579 isoform a	2.18175	1.12549	2.18175	up	chr6	+	71123106	71270877
ENST00000412855	RP11-396C23.2	3.63151	1.86057	3.63151	up	Ensembl	407	chr1	+	226274581	226277993	downstream	NM_173083	LIN9	protein lin-9 homolog	20.0223	4.32354	20.0223	up	chr1	-	226418860	226497198
ENST00000438178	AC008278.2	-4.13031	-2.04625	4.13031	down	Ensembl	409	chr2	+	15704293	15713992	downstream	NM_004939	DDX1	ATP-dependent RNA helicase DDX1	2.38811	1.25587	2.38811	up	chr2	+	15731769	15771225
ENST00000415509	RP11-338O1.2	-4.9551	-2.30891	4.9551	down	Ensembl	416	chr10	-	125185228	125187156	downstream	NM_004725	BUB3	mitotic checkpoint protein BUB3 isoform a	2.05538	1.0394	2.05538	up	chr10	+	124913759	124924886
ENST00000444744	RP11-428O18.4	-2.42847	-1.28005	2.42847	down	Ensembl	420	chr13	-	27810418	27810948	upstream	NM_206827	RASL11A	ras-like protein family member 11A	-2.38634	-1.2548	2.38634	down	chr13	+	27844463	27847827
ENST00000444744	RP11-428O18.4	-2.42847	-1.28005	2.42847	down	Ensembl	420	chr13	-	27810418	27810948	upstream	NM_001166261	MTIF3	translation initiation factor IF-3,	-3.11981	-1.64146	3.11981	down	chr13	-	28009775	28024334
uc001fuu.2	AF088076	-3.16364	-1.66158	3.16364	down	UCSC_knowngene	423	chr1	+	159931073	159946734	upstream	NM_003564	TAGLN2	transgelin-2	5.35192	2.42006	5.35192	up	chr1	-	159887902	159895284
ENST00000455247	RP5-1109J22.3	-2.06205	-1.04408	2.06205	down	Ensembl	354	chr1	+	46921494	46948147	upstream	NM_005727	TSPAN1	tetraspanin-1	-12.9228	-3.69184	12.9228	down	chr1	+	46640748	46651634
ENST00000430123	RP11-354K1.1	2.03839	1.02743	2.03839	up	Ensembl	357	chr1	+	211813149	211827518	upstream	NM_021194	SLC30A1	zinc transporter 1	2.02694	1.01931	2.02694	up	chr1	-	211748380	211752099
ENST00000437899	RP11-38L15.2	-2.36297	-1.2406	2.36297	down	Ensembl	369	chr10	-	46937462	46951699	upstream	NM_181519	SYT15	synaptotagmin-15 isoform b	-2.94821	-1.55984	2.94821	down	chr10	-	46955443	46970601
ENST00000437899	RP11-38L15.2	-2.36297	-1.2406	2.36297	down	Ensembl	369	chr10	-	46937462	46951699	upstream	NM_014696	GPRIN2	G protein-regulated inducer of neurite outgrowth	-38.2235	-5.25639	38.2235	down	chr10	+	46993545	47000568
ENST00000417800	RP11-240M16.1	2.27957	1.18876	2.27957	up	Ensembl	381	chr6	+	138266502	138293659	upstream	NM_006290	TNFAIP3	tumor necrosis factor alpha-induced protein 3	2.31213	1.20922	2.31213	up	chr6	+	138188580	138204449
ENST00000422410	RP11-344N17.8	-2.2619	-1.17753	2.2619	down	Ensembl	270	chrX	-	48193109	48193874	upstream	NM_001040612	SSX4B	protein SSX4 isoform b	2.35134	1.23348	2.35134	up	chrX	+	48242967	48252781
ENST00000422410	RP11-344N17.8	-2.2619	-1.17753	2.2619	down	Ensembl	270	chrX	-	48193109	48193874	upstream	NM_017883	WDR13	WD repeat-containing protein 13 isoform 1	2.15441	1.10729	2.15441	up	chrX	+	48455879	48463582
ENST00000443579	RP1-159A19.4	-2.48167	-1.31131	2.48167	down	Ensembl	283	chr1	+	27852315	27857072	upstream	NM_004672	MAP3K6	mitogen-activated protein kinase kinase kinase	-2.00058	-1.00042	2.00058	down	chr1	-	27681669	27693337
ENST00000443579	RP1-159A19.4	-2.48167	-1.31131	2.48167	down	Ensembl	283	chr1	+	27852315	27857072	downstream	NM_022872	IFI6	interferon alpha-inducible protein 6 isoform b	6.77006	2.75917	6.77006	up	chr1	-	27992571	27998724
ENST00000428814	RP11-432J24.2	-2.34751	-1.23113	2.34751	down	Ensembl	297	chr10	+	134232586	134234457	upstream	NM_173575	STK32C	serine/threonine-protein kinase 32C	-5.71692	-2.51524	5.71692	down	chr10	-	134020995	134121477
ENST00000428814	RP11-432J24.2	-2.34751	-1.23113	2.34751	down	Ensembl	297	chr10	+	134232586	134234457	upstream	NM_030626	LRRC27	leucine-rich repeat-containing protein 27	-3.90377	-1.96487	3.90377	down	chr10	+	134145613	134195010
ENST00000428814	RP11-432J24.2	-2.34751	-1.23113	2.34751	down	Ensembl	297	chr10	+	134232586	134234457	upstream	NM_001143757	LRRC27	leucine-rich repeat-containing protein 27	-3.03118	-1.59988	3.03118	down	chr10	+	134145740	134195010
ENST00000444515	C1orf46	-29.3329	-4.87445	29.3329	down	Ensembl	302	chr1	+	152627952	152629280	upstream	NM_019060	CRCT1	cysteine-rich C-terminal protein 1	-747.671	-9.54626	747.671	down	chr1	+	152486977	152488481
ENST00000444515	C1orf46	-29.3329	-4.87445	29.3329	down	Ensembl	302	chr1	+	152627952	152629280	downstream	NM_001025231	KPRP	keratinocyte proline-rich protein	-103.19	-6.68915	103.19	down	chr1	+	152730505	152734529
ENST00000444515	C1orf46	-29.3329	-4.87445	29.3329	down	Ensembl	302	chr1	+	152627952	152629280	downstream	NM_178351	LCE1C	late cornified envelope protein 1C	2.4155	1.27232	2.4155	up	chr1	-	152777310	152779107
ENST00000442526	RP11-517P14.2	2.2475	1.16832	2.2475	up	Ensembl	303	chr10	+	43916046	43917254	upstream	NM_020630	RET	proto-oncogene tyrosine-protein kinase receptor	-4.33697	-2.11669	4.33697	down	chr10	+	43572516	43622952
ENST00000442526	RP11-517P14.2	2.2475	1.16832	2.2475	up	Ensembl	303	chr10	+	43916046	43917254	upstream	NM_020975	RET	proto-oncogene tyrosine-protein kinase receptor	-6.32064	-2.66007	6.32064	down	chr10	+	43572516	43625797
ENST00000442526	RP11-517P14.2	2.2475	1.16832	2.2475	up	Ensembl	303	chr10	+	43916046	43917254	upstream	NM_018590	CSGALNACT2	chondroitin sulfate	3.04318	1.60558	3.04318	up	chr10	+	43633933	43680749
ENST00000442526	RP11-517P14.2	2.2475	1.16832	2.2475	up	Ensembl	303	chr10	+	43916046	43917254	upstream	NM_001098205	HNRNPF	heterogeneous nuclear ribonucleoprotein F	-2.00102	-1.00074	2.00102	down	chr10	-	43881064	43904332
ENST00000442526	RP11-517P14.2	2.2475	1.16832	2.2475	up	Ensembl	303	chr10	+	43916046	43917254	downstream	NM_145312	ZNF485	zinc finger protein 485	2.32771	1.21891	2.32771	up	chr10	+	44101854	44113352
ENST00000441287	AC011193.1	-2.90688	-1.53947	2.90688	down	Ensembl	323	chr17	+	32806352	32806976	upstream	NM_002982	CCL2	C-C motif chemokine 2 precursor	4.51	2.17313	4.51	up	chr17	+	32582295	32584220
ENST00000441287	AC011193.1	-2.90688	-1.53947	2.90688	down	Ensembl	323	chr17	+	32806352	32806976	upstream	NM_005408	CCL13	C-C motif chemokine 13 precursor	2.9742	1.5725	2.9742	up	chr17	+	32683470	32685629
ENST00000440189	RP11-179B15.5	-2.15421	-1.10716	2.15421	down	Ensembl	328	chr10	+	60064312	60065381	downstream	NM_003338	UBE2D1	ubiquitin-conjugating enzyme E2 D1 isoform 1	2.34143	1.22739	2.34143	up	chr10	+	60094738	60130513
ENST00000440189	RP11-179B15.5	-2.15421	-1.10716	2.15421	down	Ensembl	328	chr10	+	60064312	60065381	downstream	NM_003201	TFAM	transcription factor A, mitochondrial precursor	4.31215	2.10841	4.31215	up	chr10	+	60145175	60155897
ENST00000440189	RP11-179B15.5	-2.15421	-1.10716	2.15421	down	Ensembl	328	chr10	+	60064312	60065381	downstream	NM_001080512	BICC1	protein bicaudal C homolog 1	2.48539	1.31347	2.48539	up	chr10	+	60272903	60588845
ENST00000454647	C18orf20	-2.35184	-1.23379	2.35184	down	Ensembl	339	chr18	-	61747535	61765844	downstream	NM_005024	SERPINB10	serpin B10	-3.23709	-1.6947	3.23709	down	chr18	+	61582744	61602476
ENST00000454647	C18orf20	-2.35184	-1.23379	2.35184	down	Ensembl	339	chr18	-	61747535	61765844	downstream	NM_001123366	HMSD	serpin-like protein HMSD precursor	3.15371	1.65705	3.15371	up	chr18	+	61616587	61627645
ENST00000417443	NCRNA00086	-3.45732	-1.78965	3.45732	down	Ensembl	2913	chrX	+	134555867	134559682	upstream	NM_152695	ZNF449	zinc finger protein 449	2.39312	1.25889	2.39312	up	chrX	+	134478695	134497338
NR_033370	LOC63930	-3.04418	-1.60605	3.04418	down	RefSeq_NR	3366	chr20	+	61640734	61716423	upstream	NM_017896	C20orf11	protein C20orf11	4.87558	2.28557	4.87558	up	chr20	+	61569440	61579827
NR_033370	LOC63930	-3.04418	-1.60605	3.04418	down	RefSeq_NR	3366	chr20	+	61640734	61716423	downstream	NM_000744	CHRNA4	neuronal acetylcholine receptor subunit alpha-4	-10.187	-3.34866	10.187	down	chr20	-	61974664	61992695
uc002hrd.1	FLJ43826	-2.42252	-1.27651	2.42252	down	UCSC_knowngene	3580	chr17	+	37186158	37209458	upstream	NM_002795	PSMB3	proteasome subunit beta type-3	2.15483	1.10757	2.15483	up	chr17	+	36909001	36920478
uc002hrd.1	FLJ43826	-2.42252	-1.27651	2.42252	down	UCSC_knowngene	3580	chr17	+	37186158	37209458	upstream	NM_000978	RPL23	60S ribosomal protein L23	2.45097	1.29336	2.45097	up	chr17	-	37006320	37010053
ENST00000412427	RP11-380J14.1	-2.3401	-1.22657	2.3401	down	Ensembl	4676	chr1	+	17516277	17524112	upstream	NM_001141973	ATP13A2	probable cation-transporting ATPase 13A2 isoform	-2.30578	-1.20525	2.30578	down	chr1	-	17312452	17338423
uc002khh.2	LOC388312	2.6826	1.42363	2.6826	up	UCSC_knowngene	4812	chr1	-	661139	679736	upstream	NM_005101	ISG15	ubiquitin-like protein ISG15 precursor	6.5031	2.70113	6.5031	up	chr1	+	948846	949919
NR_026790	HCG11	2.32	1.21412	2.32	up	RefSeq_NR	5688	chr6	+	26521933	26527610	upstream	NM_003540	HIST1H4F	histone H4	-3.53592	-1.82209	3.53592	down	chr6	+	26240653	26241021
ENST00000450248	TUG1	3.13206	1.64711	3.13206	up	Ensembl	6477	chr22	+	31365642	31374831	downstream	NM_006932	SMTN	smoothelin isoform c	2.34725	1.23097	2.34725	up	chr22	+	31477304	31500609
ENST00000450248	TUG1	3.13206	1.64711	3.13206	up	Ensembl	6477	chr22	+	31365642	31374831	downstream	NM_001002837	INPP5J	phosphatidylinositol 4,5-bisphosphate	2.27461	1.18562	2.27461	up	chr22	+	31518960	31530683
ENST00000450248	TUG1	3.13206	1.64711	3.13206	up	Ensembl	6477	chr22	+	31365642	31374831	downstream	NM_005569	LIMK2	LIM domain kinase 2 isoform 2a	-2.55216	-1.35172	2.55216	down	chr22	+	31608249	31676066
NR_027418	LOC651250	-2.09734	-1.06856	2.09734	down	RefSeq_NR	11210	chr17	+	66097695	66132068	upstream	NM_004459	BPTF	nucleosome-remodeling factor subunit BPTF	2.59255	1.37437	2.59255	up	chr17	+	65821779	65980494
NR_027418	LOC651250	-2.09734	-1.06856	2.09734	down	RefSeq_NR	11210	chr17	+	66097695	66132068	downstream	NM_001033574	AMZ2	archaemetzincin-2 isoform 2	5.25546	2.39382	5.25546	up	chr17	+	66244144	66253305
ENST00000439207	RP11-568A7.2	-2.08594	-1.0607	2.08594	down	Ensembl	205	chr6	+	167655378	167659404	upstream	NM_004367	CCR6	C-C chemokine receptor type 6	-2.53875	-1.34412	2.53875	down	chr6	+	167525294	167552629
[truncated: 386 more rows]

## Sheet: M3 vs T1
# Condition pairs: M3 vs T1 # Fold Change cut-off: 2.0 This table contains the differentially expressed enhancer-like LncRNAs and their nearby coding genes (distance < 300 kb). # Column A: seqname, the sequence identifier. # Column B: GeneSymbol, the symbol of the LncRNA. # Column C: Fold change - LncRNAs, the ratio of normalized intensities between two samples, positive value indicates up-regula…
[truncated: 762 more rows]
