# Supplementary material for: Long Noncoding RNA Expression Signatures of Metastatic Nasopharyngeal Carcinoma and Their Prognostic Value
Source: Biomed Res Int. 2015 Sep 13;2015:618924. doi: 10.1155/2015/618924 (PMC4584063; doi:10.1155/2015/618924)
Supplement: Supplementary file 1 — Table S01. The clinical information corresponding to the seven NPC patient samples used for microarray analysis. Table S02. Four different lncRNA members (LOC84740, ENST00000498296, AL359062, and ENST00000438550) were selected to verify their expression levels via QPCR. This table supply the primer sequences used for Real-time PCR of the four lncRNAs. Table S03. lncRNA Expression Profiling Data. A total of 33,045 lncRNA probes were used in our lncRNA microarray. Up to 30,610 lncRNAs were detected in all seven samples. Table S04. Differentially Expressed lncRNAs. A total of 8,088 lncRNAs were identified to be significantly differentially expressed(≥2-fold) between the metastatic and primary NPC tumors in the microarray. Among these, 3,778 lncRNAs were found to be consistently upregulated; 4,310 lncRNAs were downregulated. Table S05. HOX cluster profiling. In this study, we detected the transcripts in HOX loci, 477 transcribed regions were found. Among them, 257 were ncRNAs and 220 were HOX coding transcripts. Table S06. Differentially expressed IncRNAs at HOX locus. In the four randomly paired groups, the number of differentially expressed lncRNAs differed, but several lncRNAs displayed similar changes in expression. Compared with the NPC primary tumors, 70 lncRNAs were found to be differentially expressed in metastatic tissues; 51 coding transcripts were differentially expressed. Table S07. Rinn lincRNA expression profiles. A total of 4,199 Rinn lincRNAs were detected in this microarray analysis. Table S08. Differentially expressed Rinn lincRNAs. A total of 1,069 Rinn lincRNAs were found to be differentially expressed. Table S09. Enhancer lncRNAs profiles. A total of 1,598 enhancer lncRNAs were detected, of which 468 lncRNAs were differentially expressed. Table S10. Data for enhancer lncRNAs regulating a nearby coding gene. The differentially expressed enhancer lncRNAs and their nearby coding genes (distance < 300 kb) were presented. Table S11. Data for lincRNAs reg [file 618924.f1.zip › S11 Data for lincRNAsregualating a nearby coding gene.xls]

## Sheet: M vs T
# Condition pairs: M vs T # Fold Change cut-off: 2.0 # P-value cut-off: 0.05 This table contains the differentially expressed lincRNA and nearby coding gene pairs (distance < 300 kb). # Column A: seqname, the sequence identifier. # Column B: GeneSymbol, the symbol of the LncRNA. # Column C: P-value - LncRNAs, it is calculated by t-test. # Column D: Fold change - LncRNAs, the ratio of normalized i…
seqname	GeneSymbol	P-value - LncRNAs	Fold change - LncRNAs	Regulation - LncRNAs	source	RNAlength	Chrom	Strand	txStart	txEnd	GenomeRelationship	NearbyGene	NearbyGeneSymbol	NearbyProteinName	P-value - mRNAs	Fold change - mRNAs	Regulation - mRNAs	NearbyGeneChrom	NearbyGeneStrand	NearbyGenetxStart	NearbyGenetxEnd
uc003tdd.2	RP9P	0.0177991	3.43037	down	UCSC_knowngene	1403	chr7	-	32956427	32982782	upstream	NM_007270	FKBP9	peptidyl-prolyl cis-trans isomerase FKBP9	0.000933	2.70609	up	chr7	+	32997004	33046543
NR_003500	RP9P	1.00424e-06	3.10736	down	RefSeq_NR	1405	chr7	-	32956427	32982782	upstream	NM_007270	FKBP9	peptidyl-prolyl cis-trans isomerase FKBP9	0.000933	2.70609	up	chr7	+	32997004	33046543
ENST00000505987	HSP90AA4P	1.51e-05	2.76857	up	Ensembl	2173	chr4	+	88812994	88815167	downstream	NM_001040058	SPP1	osteopontin isoform a precursor	9.21e-06	11.4634	up	chr4	+	88896801	88904563
ENST00000511512	RP11-71E19.1	0.00188302	2.77938	down	Ensembl	501	chr3	+	125985638	126010122	downstream	NM_182628	CCDC37	coiled-coil domain-containing protein 37	0.00249	5.97008	down	chr3	+	126113781	126155398
AI902205	lincRNA-OXGR1-2	0.000519181	2.57481	down	lincRNA	448	chr13	-	97778688	97779138	downstream	NM_080818	OXGR1	2-oxoglutarate receptor 1	0.00029	2.59738	down	chr13	-	97637972	97646604
DB340468	lincRNA-KLF13-2	0.000710049	10.3103	down	lincRNA	578	chr15	+	31598146	31598723	downstream	NM_015995	KLF13	Krueppel-like factor 13	2.07e-05	2.09113	down	chr15	+	31619082	31670102
AI354683	lincRNA-FRMD1-1	0.0467907	2.75614	down	lincRNA	439	chr6	-	168501721	168502166	downstream	NM_030615	KIF25	kinesin-like protein KIF25 isoform 1	0.00165	3.49586	down	chr6	+	168418552	168445769
DB325375	lincRNA-SIX6	0.00138762	2.21875	down	lincRNA	551	chr14	-	61110277	61110827	upstream	NM_017420	SIX4	homeobox protein SIX4	0.00069	2.20432	up	chr14	-	61176255	61190852
BC043564	lincRNA-KCNA2-1	1.06082e-06	39.0053	down	lincRNA	2022	chr1	-	111136202	111174096	downstream	NM_022768	RBM15	putative RNA-binding protein 15 isoform 1	0.000136	2.4018	up	chr1	+	110881944	110889303
ENST00000442197	AL132709.9	0.0106	3.1708	up	Ensembl	625	chr14	+	101427363	101433377	upstream	NM_001134888	RTL1	retrotransposon-like protein 1	0.000568062	2.48633	down	chr14	-	101346991	101351184
ENST00000414488	AL132709.5	0.00833	3.27485	up	Ensembl	800	chr14	+	101415314	101424887	upstream	NM_001134888	RTL1	retrotransposon-like protein 1	0.000568062	2.48633	down	chr14	-	101346991	101351184
BC036602		0.00670267	3.48492	down	RNAdb	1336	chr14	+	101319252	101320560	downstream	NM_001134888	RTL1	retrotransposon-like protein 1	0.000568062	2.48633	down	chr14	-	101346991	101351184
NR_024149	MEG8	0.000469817	7.27426	down	RefSeq_NR	501	chr14	+	101361106	101373305	upstream	NM_001134888	RTL1	retrotransposon-like protein 1	0.000568062	2.48633	down	chr14	-	101346991	101351184
NR_002766	MEG3	0.000142	4.21392	up	RefSeq_NR	1595	chr14	+	101292444	101327358	downstream	NM_001134888	RTL1	retrotransposon-like protein 1	0.000568062	2.48633	down	chr14	-	101346991	101351184
AF422192		0.00195	2.67357	up	misc_RNA	1422	chr14	+	101359264	101360646	upstream	NM_001134888	RTL1	retrotransposon-like protein 1	0.000568062	2.48633	down	chr14	-	101346991	101351184
uc001yjz.1	AK094562	0.00197348	2.89995	down	UCSC_knowngene	2638	chr14	+	101536247	101539271	upstream	NM_001134888	RTL1	retrotransposon-like protein 1	0.000568062	2.48633	down	chr14	-	101346991	101351184
NR_033358	MEG3	0.000546	3.17654	up	RefSeq_NR	1735	chr14	+	101292444	101327358	downstream	NM_001134888	RTL1	retrotransposon-like protein 1	0.000568062	2.48633	down	chr14	-	101346991	101351184
AA234012	lincRNA-AIFM1	9.34422e-06	5.82011	down	lincRNA	486	chrX	+	129251231	129318597	downstream	NM_178471	GPR119	glucose-dependent insulinotropic receptor	0.000313013	3.40839	down	chrX	-	129518318	129519511
uc010dmv.2	DM004440	0.0116707	3.05985	down	UCSC_knowngene	109	chr18	-	33484780	33484889	upstream	NM_018255	ELP2	elongator complex protein 2 isoform 2	0.00043	2.24926	up	chr18	+	33709886	33754607
chr3:46129526-46140202+	lincRNA-CCR1	0.00664007	2.03702	down	lincRNA	10677	chr3	+	46129526	46140202	downstream	NM_001123396	CCR2	C-C chemokine receptor type 2 isoform B	0.00142818	2.16943	down	chr3	+	46395234	46400868
uc010wse.1	KIAA1783	0.0454646	2.42149	down	UCSC_knowngene	9651	chr17	+	73584138	73622925	upstream	NM_001031803	LLGL2	lethal(2) giant larvae protein homolog 2 isoform	0.000342316	3.20421	down	chr17	+	73521782	73571290
CR599308	lincRNA-AEBP2-2	6.19e-06	6.83374	up	lincRNA	2138	chr12	+	19556999	19672288	overlap	NM_001114176	AEBP2	zinc finger protein AEBP2 isoform b	4.37e-05	5.7241	up	chr12	+	19592607	19675173
AK310900	lincRNA-SYT9	0.00544199	4.50146	down	lincRNA	4074	chr11	+	7041699	7159136	overlap	NM_176822	NLRP14	NACHT, LRR and PYD domains-containing protein	0.00354608	2.55792	down	chr11	+	7041699	7092757
NR_003038	SNHG5	0.000135273	2.14184	down	RefSeq_NR	524	chr6	-	86386725	86388451	downstream	NM_001159675	SYNCRIP	heterogeneous nuclear ribonucleoprotein Q	5.25e-06	4.61177	up	chr6	-	86323692	86351169
uc003plc.3	SNHG5	0.000312672	2.37971	down	UCSC_knowngene	1078	chr6	-	86386725	86388440	downstream	NM_001159675	SYNCRIP	heterogeneous nuclear ribonucleoprotein Q	5.25e-06	4.61177	up	chr6	-	86323692	86351169
AK289744	lincRNA-SUN2	1.11e-05	3.72629	down	lincRNA	2725	chr22	-	39131913	39190148	upstream	NM_014508	APOBEC3C	probable DNA dC->dU-editing enzyme APOBEC-3C	1.30704e-05	3.10249	up	chr22	+	39410264	39414825
chr14:93595225-93603463-	lincRNA-ITPK1	0.000286815	2.07714	down	lincRNA	8239	chr14	-	93595225	93603463	upstream	NM_182971	COX8C	cytochrome c oxidase subunit 8C, mitochondrial	1.16981e-05	4.85943	down	chr14	+	93813536	93814700
AL137390	lincRNA-NKAIN3	0.00024	27.1663	up	lincRNA	1202	chr8	+	62791440	62798121	upstream	NM_001164752	ASPH	aspartyl/asparaginyl beta-hydroxylase isoform h	0.000556	4.03592	up	chr8	-	62536268	62602408
EU831898	lincRNA-RPL29	6.03791e-05	5.75385	down	lincRNA	3142	chr3	-	51965892	52258329	upstream	NM_025222	WDR82	WD repeat-containing protein 82	5.972e-06	2.03072	down	chr3	-	52288437	52312659
NR_024279	FLJ37453	7.84137e-05	3.0481	down	RefSeq_NR	2732	chr1	-	16160709	16174642	upstream	NM_001042704	CLCNKA	chloride channel protein ClC-Ka isoform 2	9.9e-06	4.78179	down	chr1	+	16348485	16360545
BG679513	lincRNA-KCNT2-2	0.00394554	2.56252	up	lincRNA	868	chr1	+	193254821	193255677	upstream	NM_001042369	TROVE2	60 kDa SS-A/Ro ribonucleoprotein isoform 1	5.11e-05	5.59578	up	chr1	+	193029003	193060906
ENST00000444862	AP005273.1	0.000428231	3.51908	down	Ensembl	522	chr11	+	64268324	64272858	upstream	NM_001177358	GPR137	integral membrane protein GPR137 isoform 5	0.00728	2.52368	up	chr11	+	64052282	64056972
BX110651	lincRNA-EGLN3-2	0.000181938	4.25935	down	lincRNA	724	chr14	-	34528165	34528892	downstream	NM_001164749	NPAS3	neuronal PAS domain-containing protein 3 isoform	0.000323	9.81222	up	chr14	+	33408458	34273382
chr16:84296674-84307824+	lincRNA-WFDC1	0.0275671	2.28714	down	lincRNA	11151	chr16	+	84296674	84307824	upstream	NM_178452	LRRC50	leucine-rich repeat-containing protein 50	0.00243408	2.95728	down	chr16	+	84178864	84211524
ENST00000438350	RP11-40H20.3	1.91804e-05	2.98764	up	Ensembl	221	chr1	+	27537754	27537975	downstream	NM_015023	WDTC1	WD and tetratricopeptide repeats protein 1	3.89886e-05	2.613	down	chr1	+	27561006	27635110
CN413083	lincRNA-UFC1	2.61e-05	4.7918	up	lincRNA	687	chr1	+	161106389	161107075	downstream	NM_001102566	PCP4L1	Purkinje cell protein 4-like protein 1	6.76218e-06	19.2022	down	chr1	+	161228516	161255240
AF191495	lincRNA-F11R	3.29e-06	3.9419	up	lincRNA	2187	chr1	-	160967605	161008711	upstream	NM_001102566	PCP4L1	Purkinje cell protein 4-like protein 1	6.76218e-06	19.2022	down	chr1	+	161228516	161255240
DB027866	lincRNA-SDPR-2	6.91041e-05	5.77516	down	lincRNA	595	chr2	+	192557927	192573896	upstream	NM_012223	MYO1B	myosin-Ib isoform 2	3.33e-07	3.40194	up	chr2	+	192110106	192290115
BX952962	lincRNA-OBFC2A-2	1.97697e-05	9.72023	up	lincRNA	428	chr2	-	192564056	192564732	downstream	NM_012223	MYO1B	myosin-Ib isoform 2	3.33e-07	3.40194	up	chr2	+	192110106	192290115
uc004exm.2	BC007360	2.33e-05	4.18129	up	UCSC_knowngene	646	chrX	-	133678458	133680653	downstream	NM_000194	HPRT1	hypoxanthine-guanine phosphoribosyltransferase	7.15231e-07	3.07833	up	chrX	+	133594174	133634698
ENST00000440570	AC004383.4	0.000169	3.61863	up	Ensembl	760	chrX	-	133677366	133680662	downstream	NM_000194	HPRT1	hypoxanthine-guanine phosphoribosyltransferase	7.15231e-07	3.07833	up	chrX	+	133594174	133634698
ENST00000423943	RP11-48O20.4	1.03e-06	8.46551	down	Ensembl	1113	chr1	+	159931013	159948851	upstream	NM_020789	IGSF9	protein turtle homolog A isoform b	0.00245853	2.0118	down	chr1	-	159896828	159915386
uc001fuu.2	AF088076	0.0113	2.45427	down	UCSC_knowngene	423	chr1	+	159931073	159946734	upstream	NM_020789	IGSF9	protein turtle homolog A isoform b	0.00245853	2.0118	down	chr1	-	159896828	159915386
ENST00000438679	RP5-1065P14.1	0.00153992	2.12562	up	Ensembl	415	chr1	+	229177917	229178332	downstream	NM_004578	RAB4A	ras-related protein Rab-4A	0.000344	2.37108	down	chr1	+	229406878	229440518
chr4:114709776-114720551+	lincRNA-ARSJ-1	0.017482	2.44041	down	lincRNA	10776	chr4	+	114709776	114720551	downstream	NM_024590	ARSJ	arylsulfatase J precursor	0.000657	2.66407	up	chr4	-	114821439	114900878
DW444236	lincRNA-ZNF703-2	0.00304229	2.11408	down	lincRNA	227	chr8	+	37001355	37001513	upstream	NM_001031836	KCNU1	potassium channel subfamily U member 1	0.0273526	8.28686	down	chr8	+	36641841	36793643
uc002msx.1	AX747405	0.000106636	5.71562	down	UCSC_knowngene	1801	chr19	+	12098431	12138553	upstream	NM_152357	ZNF440	zinc finger protein 440	0.000457	2.56049	down	chr19	+	11925106	11946016
chr14:65072296-65092272+	lincRNA-PLEKHG3	0.00229194	2.17358	down	lincRNA	19977	chr14	+	65072296	65092272	upstream	NM_005956	MTHFD1	C-1-tetrahydrofolate synthase, cytoplasmic	5.9e-05	2.89719	up	chr14	+	64854758	64926725
uc003jnb.1	AK056817	0.000313474	2.24821	down	UCSC_knowngene	2757	chr5	-	42985502	42993435	downstream	NM_000163	GHR	growth hormone receptor isoform 1 precursor	0.0012693	2.0757	down	chr5	+	42424025	42721926
CD174643	lincRNA-AMOTL1-2	0.0169328	2.3393	down	lincRNA	690	chr11	+	94380374	94384794	upstream	NM_005590	MRE11A	double-strand break repair protein MRE11A	0.000183516	2.07511	down	chr11	-	94150468	94227040
BC043160		0.000558661	4.63114	up	misc_RNA	2454	chr5	-	10195298	10197734	upstream	NM_199133	FAM173B	hypothetical protein LOC134145	0.000665114	2.91775	up	chr5	-	10226437	10250014
BG210561	lincRNA-AGRP-2	0.00914839	2.70641	down	lincRNA	697	chr16	-	67551608	67552290	downstream	NM_001129731	PLEKHG4	puratrophin-1 isoform 2	0.0182279	2.56517	down	chr16	+	67313491	67323403
CN315150	lincRNA-FAM65A-3	0.00798124	2.00774	down	lincRNA	705	chr16	+	67536554	67537247	upstream	NM_001129731	PLEKHG4	puratrophin-1 isoform 2	0.0182279	2.56517	down	chr16	+	67313491	67323403
DA955413	lincRNA-FAM65A-1	0.00291443	9.96079	down	lincRNA	562	chr16	+	67552113	67552675	upstream	NM_001129731	PLEKHG4	puratrophin-1 isoform 2	0.0182279	2.56517	down	chr16	+	67313491	67323403
AX747038	lincRNA-BANK1-2	3.71765e-06	54.27	down	lincRNA	3544	chr4	+	102341117	102995967	overlap	NM_001127507	BANK1	B-cell scaffold protein with ankyrin repeats	0.00033	2.26465	down	chr4	+	102711763	102995969
uc003che.2	BC040563	4.36784e-06	5.0799	down	UCSC_knowngene	3263	chr3	-	37847343	37903250	upstream	NM_007337	DLEC1	deleted in lung and esophageal cancer protein 1	1.52025e-06	59.7777	down	chr3	+	38080695	38164228
AK000839		0.000264	24.6013	up	misc_RNA	1951	chr17	-	46657698	46659621	downstream	NM_001075099	SKAP1	src kinase-associated phosphoprotein 1 isoform	2.29e-06	7.94418	down	chr17	-	46210801	46507594
AX747492	lincRNA-HFE2	0.000421	2.27261	up	lincRNA	4510	chr1	+	145209144	146424095	overlap	NM_001101663	NBPF24	hypothetical protein LOC728912	0.000169	3.40921	up	chr1	-	146034018	146068245
ENST00000424719	RP5-884C9.3	2.26e-05	2.83942	up	Ensembl	338	chr1	-	38546247	38546585	downstream	NM_001113482	MANEAL	glycoprotein endo-alpha-1,2-mannosidase-like	0.00823	2.74378	up	chr1	+	38259773	38267278
AK126983		0.000257491	2.41018	down	misc_RNA	5637	chr22	-	24243618	24249255	downstream	NM_005940	MMP11	stromelysin-3 preproprotein	4.3e-06	23.6161	up	chr22	+	24115035	24126503
ENST00000439492	AP000350.6	0.00576	2.21717	up	Ensembl	1763	chr22	+	24269086	24271761	upstream	NM_005940	MMP11	stromelysin-3 preproprotein	4.3e-06	23.6161	up	chr22	+	24115035	24126503
AW993564	lincRNA-MAPK1IP1L-1	0.0107729	5.63083	down	lincRNA	503	chr14	-	55509240	55739892	overlap	NM_002306	LGALS3	galectin-3 isoform 1	0.000225	2.32193	down	chr14	+	55595934	55612148
ENST00000512349	CTD-2313F11.2	0.000355563	2.00684	down	Ensembl	591	chr5	+	54350255	54350968	downstream	NM_001008397	GPX8	probable glutathione peroxidase 8	1.41e-06	7.30833	up	chr5	+	54455983	54463129
ENST00000427188	C21orf84	0.000641	2.67979	up	Ensembl	967	chr21	-	44890312	44891472	upstream	NM_003681	PDXK	pyridoxal kinase	0.000252619	2.10554	up	chr21	+	45138977	45182188
chr8:37531517-37542367+	lincRNA-ZNF703-1	0.00485289	3.50012	down	lincRNA	10851	chr8	+	37531517	37542367	downstream	NM_007198	PROSC	proline synthase co-transcribed bacterial	0.000357836	2.03905	up	chr8	+	37620100	37637286
ENST00000427188	C21orf84	0.000641	2.67979	up	Ensembl	967	chr21	-	44890312	44891472	downstream	NM_173354	SIK1	serine/threonine-protein kinase SIK1	0.00101035	4.18103	down	chr21	-	44834397	44847002
ENST00000442815	AP001046.5	0.0200117	7.35786	down	Ensembl	2798	chr21	-	44778026	44782229	upstream	NM_173354	SIK1	serine/threonine-protein kinase SIK1	0.00101035	4.18103	down	chr21	-	44834397	44847002
uc004aiu.1	AK095210	0.0014432	2.57736	down	UCSC_knowngene	2078	chr9	+	74920351	74958126	downstream	NM_001102420	ZFAND5	AN1-type zinc finger protein 5	3.17e-06	2.84144	up	chr9	-	74966340	74980163
AV718641	lincRNA-PMCH	0.0038997	2.12501	down	lincRNA	636	chr12	-	102604245	102604880	downstream	NM_018370	DRAM1	DNA damage-regulated autophagy modulator protein	0.000118	2.46954	up	chr12	+	102271104	102317401
AW572416	lincRNA-WNT4	3.48728e-05	3.65927	down	lincRNA	350	chr1	-	22585663	22585982	downstream	NM_044472	CDC42	cell division control protein 42 homolog isoform	0.00023	2.26531	down	chr1	+	22379119	22417296
ENST00000455966	RP1-224A6.3	0.00219602	2.26196	down	Ensembl	615	chr1	-	22350486	22351461	upstream	NM_044472	CDC42	cell division control protein 42 homolog isoform	0.00023	2.26531	down	chr1	+	22379119	22417296
uc001wxl.2	BC084561	0.00137759	4.23393	down	UCSC_knowngene	2301	chr14	-	50504312	50507947	downstream	NM_001012706	C14orf182	hypothetical protein LOC283551	6.82e-06	9.6267	down	chr14	-	50448429	50474238
BM956062	lincRNA-PGS1	3.87e-05	5.44992	up	lincRNA	174	chr17	+	76360558	76360732	upstream	NM_018996	TNRC6C	trinucleotide repeat-containing gene 6C protein	1.77253e-06	2.53433	down	chr17	+	76000317	76104916
ENST00000393071	AC013474.3	4.26698e-05	18.1727	up	Ensembl	732	chr2	-	127315006	127315739	upstream	NM_016815	GYPC	glycophorin-C isoform 2	0.000128954	2.06664	down	chr2	+	127413683	127454246
BM909110	lincRNA-KLHDC4	0.00421514	2.01027	down	lincRNA	1172	chr16	-	87813676	87840082	downstream	NM_015144	ZCCHC14	zinc finger CCHC domain-containing protein 14	6.09945e-05	2.0733	down	chr16	-	87439851	87525460
AK097798	lincRNA-ZNF676	0.00014	4.56474	up	lincRNA	2091	chr19	-	22361892	23158666	overlap	NM_001001411	ZNF676	zinc finger protein 676	5.02e-05	4.99188	up	chr19	-	22361902	22379753
ENST00000504402	RP11-367J11.3	1.13688e-05	9.58563	down	Ensembl	292	chr4	-	7096297	7105056	downstream	NM_152293	TADA2B	transcriptional adapter 2-beta	7.39092e-05	2.64543	down	chr4	+	7045155	7059677
uc002huv.2	CR597260	5.55801e-05	6.19656	down	UCSC_knowngene	1013	chr17	+	38673277	38683253	downstream	NM_003079	SMARCE1	SWI/SNF-related matrix-associated	0.000224953	2.99858	up	chr17	-	38783975	38804103
ENST00000440194	RP11-328M4.2	0.000572	6.79223	up	Ensembl	196	chr6	-	41462590	41513981	downstream	NM_018643	TREM1	triggering receptor expressed on myeloid cells 1	2.32e-06	27.3086	up	chr6	-	41243711	41254457
NR_026938	LOC221442	0.000409105	3.45189	down	RefSeq_NR	4585	chr6	+	41068772	41108567	downstream	NM_018643	TREM1	triggering receptor expressed on myeloid cells 1	2.32e-06	27.3086	up	chr6	-	41243711	41254457
uc003ifn.2	AK090904	3.39e-05	4.78979	up	UCSC_knowngene	2962	chr4	+	128758921	128761883	downstream	NM_018078	LARP1B	la-related protein 1B isoform 1	0.00032	2.07206	up	chr4	+	128982502	129132289
AK090904		0.000126	2.25124	up	RNAdb	2547	chr4	+	128759331	128761879	downstream	NM_018078	LARP1B	la-related protein 1B isoform 1	0.00032	2.07206	up	chr4	+	128982502	129132289
AL832122		5.95258e-05	2.07834	down	misc_RNA	5572	chr1	-	23607802	23613245	upstream	NM_003196	TCEA3	transcription elongation factor A protein 3	0.000441528	5.62383	down	chr1	-	23707554	23751261
chr18:47271277-47283077-	lincRNA-LIPG-2	0.00196	4.88638	down	lincRNA	11801	chr18	-	47271277	47283077	downstream	NM_017653	DYM	dymeclin	0.000363	2.42486	up	chr18	-	46570171	46987079
chr18:46516702-46521932-	lincRNA-SMAD7-2	0.00687589	3.82454	down	lincRNA	5231	chr18	-	46516702	46521932	upstream	NM_017653	DYM	dymeclin	0.000363	2.42486	up	chr18	-	46570171	46987079
BE244504	lincRNA-FAM110A	0.016	12.4073	up	lincRNA	447	chr20	-	837118	837565	upstream	NM_006814	PSMF1	proteasome inhibitor PI31 subunit	0.00205399	2.57511	up	chr20	+	1099239	1148426
ENST00000444862	AP005273.1	0.000428231	3.51908	down	Ensembl	522	chr11	+	64268324	64272858	upstream	NM_001039496	C11orf20	hypothetical protein LOC25858	0.000610645	4.41806	down	chr11	+	64067862	64072239
AA587541	lincRNA-MEF2A	0.00290954	2.4875	down	lincRNA	441	chr15	+	99976938	99977379	downstream	NM_005587	MEF2A	myocyte-specific enhancer factor 2A isoform 1	0.00296	2.29688	up	chr15	+	100106132	100256629
uc001wxl.2	BC084561	0.00137759	4.23393	down	UCSC_knowngene	2301	chr14	-	50504312	50507947	upstream	NM_001003805	ATP5S	ATP synthase subunit s, mitochondrial isoform b	0.000158	2.91508	up	chr14	+	50779046	50792946
EB386665	lincRNA-SLN	0.0129	4.04615	up	lincRNA	821	chr11	-	107644071	107644892	upstream	NM_017516	RAB39	ras-related protein Rab-39A	9.64e-05	5.13056	up	chr11	+	107799276	107834208
AW572416	lincRNA-WNT4	3.48728e-05	3.65927	down	lincRNA	350	chr1	-	22585663	22585982	downstream	NM_005747	CELA3A	chymotrypsin-like elastase family member 3A	0.0119093	2.68099	up	chr1	+	22328148	22339035
ENST00000455966	RP1-224A6.3	0.00219602	2.26196	down	Ensembl	615	chr1	-	22350486	22351461	downstream	NM_005747	CELA3A	chymotrypsin-like elastase family member 3A	0.0119093	2.68099	up	chr1	+	22328148	22339035
AF086310		8.91035e-05	2.18787	up	misc_RNA	578	chr4	-	76007137	76007705	downstream	NM_001729	BTC	probetacellulin precursor	0.000587	2.08331	up	chr4	-	75671447	75719882
exon2911-	lincRNA-AREG	0.0196971	2.18595	down	lincRNA	160	chr4	-	75585748	75585907	upstream	NM_001729	BTC	probetacellulin precursor	0.000587	2.08331	up	chr4	-	75671447	75719882
ENST00000439492	AP000350.6	0.00576	2.21717	up	Ensembl	1763	chr22	+	24269086	24271761	upstream	NM_001007468	SMARCB1	SWI/SNF-related matrix-associated	0.00065	3.3257	up	chr22	+	24129149	24176705
AK126983		0.000257491	2.41018	down	misc_RNA	5637	chr22	-	24243618	24249255	downstream	NM_001007468	SMARCB1	SWI/SNF-related matrix-associated	0.00065	3.3257	up	chr22	+	24129149	24176705
chr1:186710802-186723077+	lincRNA-PLA2G4A-2	0.0141026	2.37824	down	lincRNA	12276	chr1	+	186710802	186723077	downstream	NM_024420	PLA2G4A	cytosolic phospholipase A2	0.00112	2.71003	up	chr1	+	186798031	186958113
BC017431		0.00237	2.3125	up	misc_RNA	2097	chr5	+	102183195	102185259	downstream	NM_015216	PPIP5K2	inositol hexakisphosphate and	0.0179147	5.29591	up	chr5	+	102465256	102538909
AW387651	lincRNA-TFE3	0.000940549	2.10775	down	lincRNA	232	chrX	-	48903267	49031062	upstream	NM_001127200	GAGE2E	G antigen 2E	0.00253	6.64867	down	chrX	+	49207159	49214420
CU444927	lincRNA-MYEOV-2	0.000748327	2.43968	up	lincRNA	742	chr11	-	69059868	69182303	overlap	NM_138768	MYEOV	hypothetical protein LOC26579	1.21637e-05	25.5039	down	chr11	+	69061621	69064754
chr14:65072296-65092272+	lincRNA-PLEKHG3	0.00229194	2.17358	down	lincRNA	19977	chr14	+	65072296	65092272	upstream	NM_172365	C14orf50	hypothetical protein LOC145376	4.18211e-06	32.264	down	chr14	+	65016619	65056096
ENST00000432147	RP4-735C1.5	0.000436622	5.64087	up	Ensembl	355	chr1	-	110353265	110353620	downstream	NM_024526	EPS8L3	epidermal growth factor receptor kinase	1.71266e-05	2.7099	down	chr1	-	110292701	110306644
uc002ike.2	LOC644246	8.87698e-05	3.10576	down	UCSC_knowngene	513	chr17	+	44270938	44274080	downstream	NM_001113738	ARL17A	ADP-ribosylation factor-like 17-like isoform a	7.1e-06	18.3292	up	chr17	-	44412267	44439163
CF135687	lincRNA-LHFPL2	3.24e-05	6.99007	up	lincRNA	600	chr5	-	77806192	78065844	downstream	NM_004866	SCAMP1	secretory carrier-associated membrane protein 1	3.04e-05	9.12689	up	chr5	+	77656338	77776562
ENST00000393071	AC013474.3	4.26698e-05	18.1727	up	Ensembl	732	chr2	-	127315006	127315739	upstream	NM_002101	GYPC	glycophorin-C isoform 1	5.63177e-05	2.04353	down	chr2	+	127413683	127454246
ENST00000430422	RP11-314A15.1	0.00266	3.25704	up	Ensembl	1160	chrX	+	65014186	65015677	downstream	NM_007268	VSIG4	V-set and immunoglobulin domain-containing	5.86e-05	6.35784	up	chrX	-	65241579	65259967
CR749501		0.000394436	3.14289	up	misc_RNA	4374	chr5	+	80201444	80205745	upstream	NM_000791	DHFR	dihydrofolate reductase	0.000129	4.19227	up	chr5	-	79922044	79950800
AL137390	lincRNA-NKAIN3	0.00024	27.1663	up	lincRNA	1202	chr8	+	62791440	62798121	upstream	NM_001164755	ASPH	aspartyl/asparaginyl beta-hydroxylase isoform k	5.99e-05	5.32855	up	chr8	-	62536268	62627199
AB051448		0.0151	3.5471	up	NRED	6475	chr22	-	45373647	45476304	downstream	NM_181335	ARHGAP8	rho GTPase-activating protein 8 isoform 2	0.000498	6.20147	up	chr22	+	45148437	45258664
BC058549	lincRNA-PLCE1	1.91615e-05	2.10225	down	lincRNA	737	chr10	+	95653757	95713998	downstream	NM_001165979	PLCE1	1-phosphatidylinositol-4,5-bisphosphate	0.0172981	5.42051	down	chr10	+	95848829	96088148
chr10:95567958-95575624-	lincRNA-LGI1	0.0112251	2.2283	down	lincRNA	7667	chr10	-	95567958	95575624	upstream	NM_001165979	PLCE1	1-phosphatidylinositol-4,5-bisphosphate	0.0172981	5.42051	down	chr10	+	95848829	96088148
AK090904		0.000126	2.25124	up	RNAdb	2547	chr4	+	128759331	128761879	upstream	NM_014278	HSPA4L	heat shock 70 kDa protein 4L	0.0126	3.43916	up	chr4	+	128703452	128754526
uc003ifn.2	AK090904	3.39e-05	4.78979	up	UCSC_knowngene	2962	chr4	+	128758921	128761883	upstream	NM_014278	HSPA4L	heat shock 70 kDa protein 4L	0.0126	3.43916	up	chr4	+	128703452	128754526
NR_027481	ZNF876P	0.011567	2.46455	up	RefSeq_NR	2621	chr4	+	206388	249771	downstream	NM_003441	ZNF141	zinc finger protein 141	0.00249	2.28593	up	chr4	+	331595	367691
CK905913	lincRNA-TTC17-2	0.00018164	2.2201	down	lincRNA	587	chr11	-	43606137	43694943	upstream	NM_001145033	C11orf96	protein Ag2 homolog	1.42224e-05	4.30234	up	chr11	+	43964105	43965433
ENST00000505100	CTB-179I1.3	0.000317429	2.50468	down	Ensembl	463	chr4	-	78137565	78138028	downstream	NM_018243	SEPT11	septin-11	5.17e-06	11.8281	up	chr4	+	77870894	77959768
AL137390	lincRNA-NKAIN3	0.00024	27.1663	up	lincRNA	1202	chr8	+	62791440	62798121	upstream	NM_032467	ASPH	aspartyl/asparaginyl beta-hydroxylase isoform d	0.000368	3.34134	up	chr8	-	62575376	62602408
chr20:541348-562112-	lincRNA-CSNK2A1	0.00578805	3.74181	down	lincRNA	20765	chr20	-	541348	562112	downstream	NM_006462	RBCK1	ranBP-type and C3HC4-type zinc finger-containing	0.00180775	2.52903	down	chr20	+	388708	411610
ENST00000430422	RP11-314A15.1	0.00266	3.25704	up	Ensembl	1160	chrX	+	65014186	65015677	upstream	NM_001010888	ZC3H12B	probable ribonuclease ZC3H12B	0.000284386	2.08209	down	chrX	+	64708614	64727767
AK022887		0.0415217	2.50819	up	RNAdb	2629	chr12	+	54513394	54516023	downstream	NM_031157	HNRNPA1	heterogeneous nuclear ribonucleoprotein A1	0.000585535	2.7226	up	chr12	+	54674487	54679030
ENST00000504210	RP11-834C11.8	2.7211e-07	5.51886	down	Ensembl	403	chr12	+	54556922	54562379	downstream	NM_031157	HNRNPA1	heterogeneous nuclear ribonucleoprotein A1	0.000585535	2.7226	up	chr12	+	54674487	54679030
NR_026656	LOC400043	0.000133	4.48828	up	RefSeq_NR	1411	chr12	+	54519854	54526619	downstream	NM_031157	HNRNPA1	heterogeneous nuclear ribonucleoprotein A1	0.000585535	2.7226	up	chr12	+	54674487	54679030
uc002msx.1	AX747405	0.000106636	5.71562	down	UCSC_knowngene	1801	chr19	+	12098431	12138553	downstream	NM_001136501	ZNF844	zinc finger protein 844	0.00260016	2.49401	down	chr19	+	12175545	12188626
CA502833	lincRNA-C13orf31-2	0.0100771	2.95688	down	lincRNA	725	chr13	-	44649456	44650165	upstream	NM_001010897	SERP2	stress-associated endoplasmic reticulum protein	0.0336964	2.05743	down	chr13	+	44947977	44971850
uc001uzl.2	BC025370	5.56942e-07	32.7811	down	UCSC_knowngene	976	chr13	-	44974387	44980021	downstream	NM_001010897	SERP2	stress-associated endoplasmic reticulum protein	0.0336964	2.05743	down	chr13	+	44947977	44971850
ENST00000432701	RP11-269C23.3	0.00103	2.16072	down	Ensembl	858	chr13	-	44974486	44980002	downstream	NM_001010897	SERP2	stress-associated endoplasmic reticulum protein	0.0336964	2.05743	down	chr13	+	44947977	44971850
uc001uzi.1	AX748251	7.70772e-05	9.21666	down	UCSC_knowngene	1961	chr13	-	44835105	44837066	upstream	NM_001010897	SERP2	stress-associated endoplasmic reticulum protein	0.0336964	2.05743	down	chr13	+	44947977	44971850
AK130806		0.00286	5.64905	down	misc_RNA	1439	chr10	+	114590927	114592210	downstream	NM_001146284	TCF7L2	transcription factor 7-like 2 isoform 4	0.00344	2.6254	up	chr10	+	114710008	114927436
AK289744	lincRNA-SUN2	1.11e-05	3.72629	down	lincRNA	2725	chr22	-	39131913	39190148	downstream	NM_020243	TOMM22	mitochondrial import receptor subunit TOM22	0.000149	3.18546	up	chr22	+	39077953	39080766
ENST00000428294	RP3-449O17.1	5.24089e-05	2.09449	down	Ensembl	700	chr22	-	38731766	38794921	upstream	NM_020243	TOMM22	mitochondrial import receptor subunit TOM22	0.000149	3.18546	up	chr22	+	39077953	39080766
BF724558	lincRNA-MCL1	3.68e-05	5.15972	up	lincRNA	428	chr1	+	150544341	150545215	upstream	NM_031901	MRPS21	28S ribosomal protein S21, mitochondrial	0.000381	2.16374	up	chr1	+	150266268	150280819
uc002huv.2	CR597260	5.55801e-05	6.19656	down	UCSC_knowngene	1013	chr17	+	38673277	38683253	downstream	NM_152349	KRT222	keratin-like protein KRT222	0.00016881	16.1143	down	chr17	-	38811871	38821416
chr3:13577339-13583378-	lincRNA-HDAC11-1	0.00825304	3.04803	down	lincRNA	6040	chr3	-	13577339	13583378	upstream	NM_001998	FBLN2	fibulin-2 isoform b precursor	0.000578	3.89918	up	chr3	+	13590624	13679922
FN091184	lincRNA-INHBA-1	0.0412495	2.15848	down	lincRNA	83	chr7	+	41046322	41046402	upstream	NM_024728	C7orf10	CaiB/baiF CoA-transferase family protein C7orf10	7.87e-05	4.96065	up	chr7	+	40174574	40900366
chr4:114709776-114720551+	lincRNA-ARSJ-1	0.017482	2.44041	down	lincRNA	10776	chr4	+	114709776	114720551	upstream	NM_172115	CAMK2D	calcium/calmodulin-dependent protein kinase type	0.000191	2.71121	up	chr4	-	114378343	114683083
BC043564	lincRNA-KCNA2-1	1.06082e-06	39.0053	down	lincRNA	2022	chr1	-	111136202	111174096	upstream	NM_001040033	CD53	leukocyte surface antigen CD53	6.8175e-05	5.46487	down	chr1	+	111413820	111442558
chrX:102236694-102253244-	lincRNA-RAB40AL-1	0.00837814	3.74944	down	lincRNA	16551	chrX	-	102236694	102253244	upstream	NM_001127688	BEX4	protein BEX4	7.65651e-05	4.08487	down	chrX	+	102470019	102472095
chr7:73684091-73687309-	lincRNA-RFC2	0.00426369	2.57351	down	lincRNA	3219	chr7	-	73684091	73687309	downstream	NM_031992	EIF4H	eukaryotic translation initiation factor 4H	0.000698	2.21108	up	chr7	+	73588705	73611429
AK293746	lincRNA-NDST1-2	0.00603	2.44939	up	lincRNA	3451	chr5	+	149877339	149933276	upstream	NM_001012301	ARSI	arylsulfatase I precursor	1.65397e-05	6.44128	up	chr5	-	149675908	149682525
AI218855	lincRNA-RPS14-2	5.66868e-06	5.93691	down	lincRNA	269	chr5	-	149855120	149864849	downstream	NM_001012301	ARSI	arylsulfatase I precursor	1.65397e-05	6.44128	up	chr5	-	149675908	149682525
ENST00000429730	AC079767.4	3.77e-06	8.90326	down	Ensembl	492	chr2	+	208527098	208531748	upstream	NM_001127395	METTL21A	methyltransferase-like protein 21A	0.0117	2.14906	up	chr2	-	208473838	208489973
BP264199	lincRNA-GCNT3	5.21402e-06	4.67848	down	lincRNA	578	chr15	+	59848253	59911852	upstream	NM_152450	FAM81A	hypothetical protein LOC145773	0.00218	2.79542	up	chr15	+	59730371	59815751
ENST00000396071	AC092868.2	0.00173	3.45014	up	Ensembl	777	chr15	-	59693421	59694203	upstream	NM_152450	FAM81A	hypothetical protein LOC145773	0.00218	2.79542	up	chr15	+	59730371	59815751
ENST00000444862	AP005273.1	0.000428231	3.51908	down	Ensembl	522	chr11	+	64268324	64272858	upstream	NM_001006944	RPS6KA4	ribosomal protein S6 kinase alpha-4 isoform b	0.000476	2.31079	up	chr11	+	64126624	64139687
uc001xsz.2	BC038792	3.97e-05	7.45905	down	UCSC_knowngene	364	chr14	-	77514515	77547598	upstream	NM_001010860	SAMD15	sterile alpha motif domain-containing protein	9.87456e-05	5.89876	down	chr14	+	77843761	77857587
AK091103		0.000287653	3.41418	down	misc_RNA	1924	chr4	-	174289045	174290964	upstream	NM_021973	HAND2	heart- and neural crest derivatives-expressed	0.00348161	2.11233	down	chr4	-	174447651	174451378
uc003jnb.1	AK056817	0.000313474	2.24821	down	UCSC_knowngene	2757	chr5	-	42985502	42993435	upstream	NM_003432	ZNF131	zinc finger protein 131	0.000125	4.79034	up	chr5	+	43121641	43175823
chr16:84296674-84307824+	lincRNA-WFDC1	0.0275671	2.28714	down	lincRNA	11151	chr16	+	84296674	84307824	downstream	NM_014861	ATP2C2	calcium-transporting ATPase type 2C member 2	5.14366e-05	14.8481	down	chr16	+	84402132	84497793
ENST00000423943	RP11-48O20.4	1.03e-06	8.46551	down	Ensembl	1113	chr1	+	159931013	159948851	upstream	NM_001004310	FCRL6	Fc receptor-like protein 6 precursor	0.000268	12.1273	down	chr1	+	159772172	159786047
uc001fuu.2	AF088076	0.0113	2.45427	down	UCSC_knowngene	423	chr1	+	159931073	159946734	upstream	NM_001004310	FCRL6	Fc receptor-like protein 6 precursor	0.000268	12.1273	down	chr1	+	159772172	159786047
NR_027113	LOC285740	0.00818517	3.36247	down	RefSeq_NR	1514	chr6	-	143875466	143890476	upstream	NM_032860	LTV1	protein LTV1 homolog	7.43e-05	2.37638	up	chr6	+	144164507	144184943
DN918055	lincRNA-SGIP1	0.00129	2.27115	up	lincRNA	399	chr1	+	66890612	67423817	overlap	NM_207014	WDR78	WD repeat-containing protein 78 isoform 2	0.000222427	7.48695	down	chr1	-	67303281	67390570
DN918054	lincRNA-PDE4B	0.0323	2.05443	down	lincRNA	400	chr1	-	66890612	67423817	overlap	NM_207014	WDR78	WD repeat-containing protein 78 isoform 2	0.000222427	7.48695	down	chr1	-	67303281	67390570
BG679513	lincRNA-KCNT2-2	0.00394554	2.56252	up	lincRNA	868	chr1	+	193254821	193255677	upstream	NM_001042370	TROVE2	60 kDa SS-A/Ro ribonucleoprotein isoform 3	4.12e-05	3.02002	up	chr1	+	193029003	193060906
AB051448		0.0151	3.5471	up	NRED	6475	chr22	-	45373647	45476304	downstream	NM_001017530	PRR5	proline-rich protein 5 isoform 3	0.0133	4.41036	down	chr22	+	45072687	45133561
BI029614	lincRNA-ERF	0.00147314	2.80695	down	lincRNA	493	chr19	-	42777698	42778182	upstream	NM_001145939	PAFAH1B3	platelet-activating factor acetylhydrolase IB	0.000118	2.69984	up	chr19	-	42801184	42806929
BC034819		0.000597	2.34421	up	NRED	2882	chr4	+	153457444	153460292	downstream	NM_014447	ARFIP1	arfaptin-1 isoform 2	0.00156248	3.40565	up	chr4	+	153701111	153833063
chr8:16980864-16988341-	lincRNA-EFHA2-1	0.00373072	2.50315	down	lincRNA	7478	chr8	-	16980864	16988341	upstream	NM_054026	CNOT7	CCR4-NOT transcription complex subunit 7 isoform	1.25912e-05	2.14345	up	chr8	-	17089021	17104387
NR_015442	LOC401397	0.000484	3.19581	up	RefSeq_NR	1055	chr7	-	112756773	112758637	downstream	NM_152556	C7orf60	hypothetical protein LOC154743	8.8e-05	2.79429	up	chr7	-	112459201	112579932
ENST00000432147	RP4-735C1.5	0.000436622	5.64087	up	Ensembl	355	chr1	-	110353265	110353620	downstream	NM_000848	GSTM2	glutathione S-transferase Mu 2 isoform 1	2.26877e-05	5.91412	down	chr1	+	110210643	110217908
uc001wxl.2	BC084561	0.00137759	4.23393	down	UCSC_knowngene	2301	chr14	-	50504312	50507947	upstream	NM_024558	METTL21D	methyltransferase-like protein 21D isoform a	0.00018	2.35958	up	chr14	-	50575349	50583297
BU690073	lincRNA-CCDC33	3.22796e-06	5.76369	down	lincRNA	416	chr15	+	74513616	74513896	upstream	NM_033240	PML	protein PML isoform 2	0.00294	2.69796	up	chr15	+	74287013	74328735
chr15:74197716-74198633-	lincRNA-TBC1D21-1	0.0227653	2.14238	down	lincRNA	918	chr15	-	74197716	74198633	upstream	NM_033240	PML	protein PML isoform 2	0.00294	2.69796	up	chr15	+	74287013	74328735
uc001mkl.1	AK001432	1.68e-05	2.64766	up	UCSC_knowngene	1558	chr11	-	13001081	13011095	upstream	NM_001030272	ARNTL	aryl hydrocarbon receptor nuclear	0.000855	3.56332	up	chr11	+	13299324	13408812
ENST00000505100	CTB-179I1.3	0.000317429	2.50468	down	Ensembl	463	chr4	-	78137565	78138028	downstream	NM_004354	CCNG2	cyclin-G2	0.000167	3.5535	up	chr4	+	78078356	78091213
DY655635	lincRNA-C16orf75-2	0.00124	2.61427	down	lincRNA	379	chr16	-	11477618	11478868	downstream	NM_152308	C16orf75	recQ-mediated genome instability protein 2	1.69e-07	12.6179	up	chr16	+	11439310	11445617
chr12:32192533-32208358-	lincRNA-C12orf35-1	0.0351746	2.6389	down	lincRNA	15826	chr12	-	32192533	32208358	downstream	NM_018169	C12orf35	hypothetical protein LOC55196	9.97608e-05	2.27715	down	chr12	+	32112352	32146043
ENST00000421455	RP4-668G5.1	0.000526819	2.53549	down	Ensembl	768	chr1	-	61419725	61436417	upstream	NM_001134673	NFIA	nuclear factor 1 A-type isoform 1	0.01	2.0995	down	chr1	+	61547979	61928460
NR_027064	PLAC2	0.000959985	2.35962	down	RefSeq_NR	3693	chr19	-	5558179	5568005	upstream	NM_152784	TMEM146	transmembrane protein 146 precursor	0.00629324	3.67915	up	chr19	+	5720687	5778742
AW361687	lincRNA-LNX2	0.0105	2.16931	down	lincRNA	601	chr13	+	28003341	28423867	downstream	NM_175854	PAN3	PAB-dependent poly(A)-specific ribonuclease	0.000295989	2.63687	down	chr13	+	28712642	28869475
ENST00000444862	AP005273.1	0.000428231	3.51908	down	Ensembl	522	chr11	+	64268324	64272858	upstream	NM_003377	VEGFB	vascular endothelial growth factor B precursor	5.74e-05	2.01975	down	chr11	+	64002265	64006259
chr14:93595225-93603463-	lincRNA-ITPK1	0.000286815	2.07714	down	lincRNA	8239	chr14	-	93595225	93603463	upstream	NM_032490	C14orf142	hypothetical protein LOC84520	8.16128e-05	5.35981	down	chr14	-	93669236	93673459
NR_015360	FLJ33630	0.0014785	2.02457	down	RefSeq_NR	2977	chr5	-	127357245	127418766	upstream	NM_001046	SLC12A2	solute carrier family 12 member 2	0.00639779	2.13233	down	chr5	+	127419482	127525380
uc003cmy.1	AK124776	0.000249	64.2619	down	UCSC_knowngene	4060	chr3	+	44159797	44163857	downstream	NM_001029839	C3orf23	tolerance associated gene-1 isoform 2	0.000586307	4.70228	up	chr3	+	44379943	44401294
ENST00000501118	AC010733.1	0.0169781	3.34094	down	Ensembl	2828	chr2	+	61159962	61163467	downstream	NM_001129993	KIAA1841	KIAA1841 protein isoform a	4.14e-05	3.13555	down	chr2	+	61293005	61351413
chr13:112169174-112181374-	lincRNA-C13orf16-3	0.00395162	2.10279	down	lincRNA	12201	chr13	-	112169174	112181374	downstream	NM_001113512	ARHGEF7	rho guanine nucleotide exchange factor 7 isoform	0.000216	6.6687	down	chr13	+	111767623	111947542
uc003che.2	BC040563	4.36784e-06	5.0799	down	UCSC_knowngene	3263	chr3	-	37847343	37903250	upstream	NM_007335	DLEC1	deleted in lung and esophageal cancer protein 1	0.00104305	3.91655	down	chr3	+	38080695	38164228
AK130806		0.00286	5.64905	down	misc_RNA	1439	chr10	+	114590927	114592210	downstream	NM_001146286	TCF7L2	transcription factor 7-like 2 isoform 6	0.0251	2.18246	up	chr10	+	114710008	114927436
CN284611	lincRNA-CUX2	0.0229441	2.11502	down	lincRNA	731	chr12	+	111378154	111378886	upstream	NM_001173976	TCTN1	tectonic-1 isoform 5	2.44e-05	2.16595	down	chr12	+	111051831	111086935
AK125021		0.000243217	2.05151	down	misc_RNA	4140	chr11	-	107182857	107186997	downstream	NM_000855	GUCY1A2	guanylate cyclase soluble subunit alpha-2	0.000142	6.47692	up	chr11	-	106557909	106889171
exon90+	lincRNA-KNCN	0.00173903	2.53978	down	lincRNA	643	chr1	+	46985867	46986509	downstream	NM_000779	CYP4B1	cytochrome P450 4B1 isoform b	0.000867847	2.12936	down	chr1	+	47264669	47285021
AK057313	lincRNA-PTPN4	4.13512e-06	8.88852	down	lincRNA	2048	chr2	+	120436774	120481191	overlap	NM_001105198	TMEM177	transmembrane protein 177	0.00632734	4.8469	up	chr2	+	120436742	120439694
BX101114	lincRNA-ERMN	0.00572313	4.88412	down	lincRNA	796	chr2	-	158215198	158215993	upstream	NM_004288	CYTIP	cytohesin-interacting protein	1.15e-05	4.5149	down	chr2	-	158271130	158300604
ENST00000444862	AP005273.1	0.000428231	3.51908	down	Ensembl	522	chr11	+	64268324	64272858	downstream	NM_153378	SLC22A12	solute carrier family 22 member 12 isoform b	0.0174	2.59957	down	chr11	+	64358281	64369820
ENST00000394662	RP4-644F6.3	0.000351	8.35732	up	Ensembl	1740	chr1	+	89875877	89891802	upstream	NM_198460	GBP6	guanylate-binding protein 6	0.000305608	7.99859	down	chr1	+	89829435	89853719
BC036122	lincRNA-LRRC8D-2	8.16595e-06	2.46645	down	lincRNA	3001	chr1	+	90098630	90230061	upstream	NM_198460	GBP6	guanylate-binding protein 6	0.000305608	7.99859	down	chr1	+	89829435	89853719
NR_003133	LOC400759	0.000293	4.12654	up	RefSeq_NR	1234	chr1	+	89873237	89890493	upstream	NM_198460	GBP6	guanylate-binding protein 6	0.000305608	7.99859	down	chr1	+	89829435	89853719
ENST00000411949	AC006460.2	0.0154	3.07145	up	Ensembl	717	chr2	-	191541760	191573442	upstream	NM_007315	STAT1	signal transducer and activator of transcription	1.22e-05	2.42722	up	chr2	-	191833761	191878976
chr10:112147868-112175330+	lincRNA-DUSP5-3	0.0103	2.83103	down	lincRNA	27463	chr10	+	112147868	112175330	upstream	NM_019903	ADD3	gamma-adducin isoform b	0.0166	2.71002	up	chr10	+	111765725	111895323
ENST00000417795	AC034220.3	0.01561	2.05057	down	Ensembl	1792	chr5	-	131646977	131705608	upstream	NM_001013717	C5orf56	hypothetical protein LOC441108 isoform 1	1.44e-05	8.02388	up	chr5	+	131746672	131798059
AK056779		0.0255327	8.67396	up	misc_RNA	1969	chr8	+	30044816	30047775	downstream	NM_006867	RBPMS	RNA-binding protein with multiple splicing	5.92638e-06	3.53262	down	chr8	+	30241943	30429734
ENST00000411846	RP11-483I13.4	7.57216e-05	12.9653	down	Ensembl	1570	chr1	+	108815564	108880475	upstream	NM_001143989	NBPF4	neuroblastoma breakpoint family, member 4	0.00927	2.65626	down	chr1	-	108765962	108786703
ENST00000512710	AL359643.3	0.000260265	3.06868	down	Ensembl	3273	chr6	-	5031989	5054657	upstream	NM_001164840	LYRM4	LYR motif-containing protein 4 isoform 2	3.09e-05	2.00149	up	chr6	-	5186833	5261172
uc002huv.2	CR597260	5.55801e-05	6.19656	down	UCSC_knowngene	1013	chr17	+	38673277	38683253	upstream	NM_001254	CDC6	cell division control protein 6 homolog	0.00121	13.9747	up	chr17	+	38444145	38459413
AW086055	lincRNA-PRRC2C	5.8e-06	2.51887	up	lincRNA	378	chr1	-	171562278	171562866	downstream	NM_002022	FMO4	dimethylaniline monooxygenase [N-oxide-forming]	0.000596	2.07614	up	chr1	+	171283485	171311223
ENST00000424719	RP5-884C9.3	2.26e-05	2.83942	up	Ensembl	338	chr1	-	38546247	38546585	downstream	NM_001142726	C1orf122	hypothetical protein LOC127687 isoform 2	0.00783	2.76352	up	chr1	+	38273472	38275126
AX747038	lincRNA-BANK1-2	3.71765e-06	54.27	down	lincRNA	3544	chr4	+	102341117	102995967	overlap	NM_001083907	BANK1	B-cell scaffold protein with ankyrin repeats	0.00939089	6.34939	down	chr4	+	102734982	102995969
CN284611	lincRNA-CUX2	0.0229441	2.11502	down	lincRNA	731	chr12	+	111378154	111378886	downstream	NM_015267	CUX2	homeobox protein cut-like 2	0.00678	2.28106	up	chr12	+	111471827	111788358
ENST00000431464	RP11-308D16.4	6.44053e-07	9.03094	down	Ensembl	646	chrX	+	135991633	136103777	upstream	NM_001164803	RBMX	heterogeneous nuclear ribonucleoprotein G	0.000284	2.54228	up	chrX	-	135951352	135962939
ENST00000419357	C6orf214	0.00161792	2.12053	down	Ensembl	264	chr6	-	30766430	30798436	upstream	NM_014070	C6orf15	STG protein precursor	0.00783631	3.27377	down	chr6	-	31078999	31080332
chr8:16980864-16988341-	lincRNA-EFHA2-1	0.00373072	2.50315	down	lincRNA	7478	chr8	-	16980864	16988341	upstream	NM_152415	VPS37A	vacuolar protein sorting-associated protein 37A	1.73e-05	2.6877	up	chr8	+	17104400	17155533
AK091103		0.000287653	3.41418	down	misc_RNA	1924	chr4	-	174289045	174290964	downstream	NM_002129	HMGB2	high mobility group protein B2	0.000808	3.2224	up	chr4	-	174252526	174255595
BU686812	lincRNA-PAPSS1	0.00329	2.34362	up	lincRNA	642	chr4	+	108304064	108552960	downstream	NM_183075	CYP2U1	cytochrome P450 2U1	0.000101542	2.64232	down	chr4	+	108852716	108874613
uc001edc.1	BC047723	0.000289	2.09822	up	UCSC_knowngene	1208	chr1	+	113499036	113542118	upstream	NM_005167	PPM1J	protein phosphatase 1J	3.43104e-06	9.72982	down	chr1	-	113252615	113257950
AK095243		4.81e-05	4.57527	up	misc_RNA	2460	chr17	-	39805306	39807765	downstream	NM_003770	KRT37	keratin, type I cuticular Ha7	0.00388	2.5359	down	chr17	-	39576808	39580822
AK094723		1.71e-05	12.8509	up	misc_RNA	2466	chr17	+	39821817	39824283	upstream	NM_003770	KRT37	keratin, type I cuticular Ha7	0.00388	2.5359	down	chr17	-	39576808	39580822
DA877320	lincRNA-SUPT3H-2	0.000413	3.11679	down	lincRNA	582	chr6	+	44698872	44797742	upstream	NM_001253	CDC5L	cell division cycle 5-like protein	8.27e-05	4.33216	up	chr6	+	44355301	44414780
chr15:74197716-74198633-	lincRNA-TBC1D21-1	0.0227653	2.14238	down	lincRNA	918	chr15	-	74197716	74198633	upstream	NM_001130136	ISLR2	immunoglobulin superfamily containing	0.0192	2.63125	down	chr15	+	74421714	74429143
BU690073	lincRNA-CCDC33	3.22796e-06	5.76369	down	lincRNA	416	chr15	+	74513616	74513896	upstream	NM_001130136	ISLR2	immunoglobulin superfamily containing	0.0192	2.63125	down	chr15	+	74421714	74429143
DA857280	lincRNA-SEMA7A	0.0158469	2.61328	down	lincRNA	581	chr15	+	74683148	74683728	upstream	NM_001130136	ISLR2	immunoglobulin superfamily containing	0.0192	2.63125	down	chr15	+	74421714	74429143
BM956062	lincRNA-PGS1	3.87e-05	5.44992	up	lincRNA	174	chr17	+	76360558	76360732	upstream	NM_001168	BIRC5	baculoviral IAP repeat-containing protein 5	1.81e-05	20.9401	up	chr17	+	76210276	76221716
BC017431		0.00237	2.3125	up	misc_RNA	2097	chr5	+	102183195	102185259	downstream	NM_138821	PAM	peptidyl-glycine alpha-amidating monooxygenase	1.31e-06	2.49955	up	chr5	+	102201526	102366808
uc003ebe.1	AX747798	5.23488e-07	41.4909	down	UCSC_knowngene	3023	chr3	+	113933237	113955051	downstream	NM_001164347	ZBTB20	zinc finger and BTB domain-containing protein 20	0.00757609	3.70819	down	chr3	-	114056946	114343053
ENST00000451066	AC009473.1	1.64128e-05	4.41277	down	Ensembl	692	chr7	-	7989483	7990340	upstream	NM_138426	GLCCI1	glucocorticoid-induced transcript 1 protein	0.000109554	3.87643	down	chr7	+	8008422	8128709
ENST00000399411	AC006465.4	0.000189	22.0357	up	Ensembl	1150	chr7	-	7948930	7950080	upstream	NM_138426	GLCCI1	glucocorticoid-induced transcript 1 protein	0.000109554	3.87643	down	chr7	+	8008422	8128709
chr2:68206296-68223571-	lincRNA-ETAA1-2	0.0477379	4.71402	down	lincRNA	17276	chr2	-	68206296	68223571	upstream	NM_000945	PPP3R1	calcineurin subunit B type 1	0.000362728	3.93291	up	chr2	-	68405988	68479651
AK054728	lincRNA-CALCA	2.66049e-05	2.3593	down	lincRNA	2258	chr11	+	14926542	15100182	overlap	NM_001741	CALCA	calcitonin CT preproprotein	0.000706176	2.2269	down	chr11	-	14990047	14993832
ENST00000482052	HLA-L	0.00182015	2.14118	up	Ensembl	1765	chr6	+	30227360	30260791	downstream	NM_001025091	ABCF1	ATP-binding cassette sub-family F member 1	0.00231	4.32043	up	chr6	+	30539169	30559309
ENST00000419357	C6orf214	0.00161792	2.12053	down	Ensembl	264	chr6	-	30766430	30798436	downstream	NM_001025091	ABCF1	ATP-binding cassette sub-family F member 1	0.00231	4.32043	up	chr6	+	30539169	30559309
AL133087	lincRNA-PGAP1	3.23e-05	3.36136	down	lincRNA	2825	chr2	-	197831742	197987457	downstream	NM_001080539	CCDC150	coiled-coil domain-containing protein 150	7.61e-06	4.63676	up	chr2	+	197504355	197597530
chr17:72383376-72409968-	lincRNA-GPR142	0.0113988	2.4275	down	lincRNA	26593	chr17	-	72383376	72409968	downstream	NM_153209	KIF19	kinesin-like protein KIF19	1.81e-06	49.5647	down	chr17	+	72322350	72351959
DN920247	lincRNA-SCARB2	0.000471954	5.41081	up	lincRNA	527	chr4	-	77102106	77155656	upstream	NM_003943	STBD1	starch-binding domain-containing protein 1	3.41857e-05	3.97554	down	chr4	+	77227676	77232283
AK124936	lincRNA-FAM47E	1.46772e-05	70.3504	down	lincRNA	1624	chr4	+	77135192	77204933	downstream	NM_003943	STBD1	starch-binding domain-containing protein 1	3.41857e-05	3.97554	down	chr4	+	77227676	77232283
DB344658	lincRNA-SH2D4A-1	0.0136323	2.23601	down	lincRNA	568	chr8	+	18899540	18900108	downstream	NM_001174160	SH2D4A	SH2 domain-containing protein 4A isoform b	0.000433	6.08406	down	chr8	+	19171080	19253729
ENST00000504210	RP11-834C11.8	2.7211e-07	5.51886	down	Ensembl	403	chr12	+	54556922	54562379	downstream	NM_016057	COPZ1	coatomer subunit zeta-1	0.000105	2.04896	up	chr12	+	54718910	54745633
NR_026656	LOC400043	0.000133	4.48828	up	RefSeq_NR	1411	chr12	+	54519854	54526619	downstream	NM_016057	COPZ1	coatomer subunit zeta-1	0.000105	2.04896	up	chr12	+	54718910	54745633
AK022887		0.0415217	2.50819	up	RNAdb	2629	chr12	+	54513394	54516023	downstream	NM_016057	COPZ1	coatomer subunit zeta-1	0.000105	2.04896	up	chr12	+	54718910	54745633
BQ302800	lincRNA-PRSS38	0.00741	5.78172	up	lincRNA	740	chr1	-	227890324	228285713	overlap	NM_001024226	ARF1	ADP-ribosylation factor 1	0.00113011	2.52549	up	chr1	+	228270360	228286913
BX102989	lincRNA-SPATA19-2	0.000105	10.0268	up	lincRNA	350	chr11	-	133778893	133781850	upstream	NM_015261	NCAPD3	condensin-2 complex subunit D3	0.00492882	5.79574	up	chr11	-	134022336	134094426
AX747492	lincRNA-HFE2	0.000421	2.27261	up	lincRNA	4510	chr1	+	145209144	146424095	overlap	NM_006472	TXNIP	thioredoxin-interacting protein	2.45024e-06	2.75261	down	chr1	+	145438461	145442628
AK091999		0.00335488	3.48602	up	misc_RNA	2613	chr1	+	219444115	219446727	upstream	NM_138794	LYPLAL1	lysophospholipase-like protein 1	4.6e-06	2.6598	up	chr1	+	219347191	219386207
ENST00000424084	RP4-799D16.1	0.0324	2.9248	down	Ensembl	490	chr1	-	25370197	25439610	upstream	NM_015484	SYF2	pre-mRNA-splicing factor SYF2 isoform 1	0.000135	2.00875	down	chr1	-	25548766	25559013
ENST00000442418	RP11-86H7.1	0.000343526	2.96234	down	Ensembl	748	chr1	-	95104016	95285652	downstream	NM_001122674	ABCD3	ATP-binding cassette sub-family D member 3	0.000172	2.79446	down	chr1	+	94883932	94944260
BC043287		0.0421498	2.66611	down	misc_RNA	2924	chr1	+	95143530	95146436	upstream	NM_001122674	ABCD3	ATP-binding cassette sub-family D member 3	0.000172	2.79446	down	chr1	+	94883932	94944260
chr2:232219356-232231081-	lincRNA-ARMC9	0.00762354	2.28468	down	lincRNA	11726	chr2	-	232219356	232231081	upstream	NM_145236	B3GNT7	UDP-GlcNAc:betaGal	0.00133	3.18141	down	chr2	+	232260334	232265875
chr6:34524172-34539872+	lincRNA-C6orf106	0.00777014	3.17656	up	lincRNA	15701	chr6	+	34524172	34539872	downstream	NM_003093	SNRPC	U1 small nuclear ribonucleoprotein C	0.000396	2.05546	up	chr6	+	34724870	34741634
BC034819		0.000597	2.34421	up	NRED	2882	chr4	+	153457444	153460292	downstream	NM_001025593	ARFIP1	arfaptin-1 isoform 2	0.000843	3.75432	up	chr4	+	153701111	153833063
CN413083	lincRNA-UFC1	2.61e-05	4.7918	up	lincRNA	687	chr1	+	161106389	161107075	downstream	NM_032174	TOMM40L	mitochondrial import receptor subunit TOM40B	0.0047	2.52488	up	chr1	+	161195832	161200407
AF191495	lincRNA-F11R	3.29e-06	3.9419	up	lincRNA	2187	chr1	-	160967605	161008711	upstream	NM_032174	TOMM40L	mitochondrial import receptor subunit TOM40B	0.0047	2.52488	up	chr1	+	161195832	161200407
AF289584	lincRNA-NKD1	0.00770905	3.40259	down	lincRNA	2142	chr16	+	50369047	50668127	upstream	NM_001040284	PAPD5	PAP-associated domain-containing protein 5	0.000865	2.99504	up	chr16	+	50186828	50269219
ENST00000514092	CTC-454M9.1	1.15e-05	6.05389	down	Ensembl	501	chr5	+	88185261	88761799	upstream	NM_002397	MEF2C	myocyte-specific enhancer factor 2C isoform 1	0.000475	2.01409	up	chr5	-	88014057	88179283
uc003kjn.1	AL050132	0.00523396	2.33345	down	UCSC_knowngene	1754	chr5	+	88185151	88263096	upstream	NM_002397	MEF2C	myocyte-specific enhancer factor 2C isoform 1	0.000475	2.01409	up	chr5	-	88014057	88179283
ENST00000475886	RP11-129K20.2	0.00944073	2.11391	down	Ensembl	758	chr3	+	62936104	63109888	upstream	NM_183393	CADPS	calcium-dependent secretion activator 1 isoform	0.000696652	4.2142	down	chr3	-	62384020	62861064
ENST00000440088	AC090421.1	0.000102181	2.84706	down	Ensembl	2029	chr7	-	77286976	77325582	downstream	NM_002835	PTPN12	tyrosine-protein phosphatase non-receptor type	0.000381561	6.58321	up	chr7	+	77166772	77269388
ENST00000444862	AP005273.1	0.000428231	3.51908	down	Ensembl	522	chr11	+	64268324	64272858	upstream	NM_031471	FERMT3	fermitin family homolog 3 short form	0.000546	3.07187	down	chr11	+	63974151	63991363
chrX:38716431-38792681-	lincRNA-MID1IP1-9	0.00289651	3.11865	down	lincRNA	76251	chrX	-	38716431	38792681	downstream	NM_004615	TSPAN7	tetraspanin-7	2.4e-05	2.32311	down	chrX	+	38420730	38548172
uc003cqw.1	AK096853	9.06102e-06	5.80489	down	UCSC_knowngene	2353	chr3	+	47205986	47285546	upstream	NM_144716	CCDC12	coiled-coil domain-containing protein 12	5.63805e-05	2.39892	down	chr3	-	46963219	47018270
chr4:25089927-25101952+	lincRNA-SEPSECS-1	1.75e-05	4.78454	down	lincRNA	12026	chr4	+	25089927	25101952	downstream	NM_018323	PI4K2B	phosphatidylinositol 4-kinase type 2-beta	0.000155	6.05254	up	chr4	+	25235652	25280831
BE244504	lincRNA-FAM110A	0.016	12.4073	up	lincRNA	447	chr20	-	837118	837565	upstream	NM_178578	PSMF1	proteasome inhibitor PI31 subunit	0.0138007	2.02635	down	chr20	+	1093905	1148426
BQ302800	lincRNA-PRSS38	0.00741	5.78172	up	lincRNA	740	chr1	-	227890324	228285713	upstream	NM_000858	GUK1	guanylate kinase isoform b	0.000273	2.76276	up	chr1	+	228327928	228336655
DY655635	lincRNA-C16orf75-2	0.00124	2.61427	down	lincRNA	379	chr16	-	11477618	11478868	downstream	NM_003745	SOCS1	suppressor of cytokine signaling 1	5.60516e-06	6.32753	up	chr16	-	11348273	11350039
chr4:71997061-72013886+	lincRNA-SLC4A4	1.98476e-05	2.42182	down	lincRNA	16826	chr4	+	71997061	72013886	downstream	NM_003759	SLC4A4	electrogenic sodium bicarbonate cotransporter 1	0.00311188	2.09745	down	chr4	+	72204769	72437804
DB297898	lincRNA-ANKRD34C-1	0.0139056	2.01192	down	lincRNA	528	chr15	+	79518905	79519430	downstream	NM_001146341	ANKRD34C	ankyrin repeat domain-containing protein 34C	0.0396388	2.20395	down	chr15	+	79575145	79590581
NR_024279	FLJ37453	7.84137e-05	3.0481	down	RefSeq_NR	2732	chr1	-	16160709	16174642	overlap	NM_015001	SPEN	msx2-interacting protein	0.000399095	2.21188	down	chr1	+	16174358	16266950
chr1:149731347-149744257-	lincRNA-PPIAL4B-1	0.000942	5.09017	down	lincRNA	12911	chr1	-	149731347	149744257	upstream	NM_003517	HIST2H2AC	histone H2A type 2-C	3.39e-05	5.44815	up	chr1	+	149858524	149858961
AK291502	lincRNA-HIST2H2BF	0.000477	8.23087	up	lincRNA	1686	chr1	+	149369293	149763584	downstream	NM_003517	HIST2H2AC	histone H2A type 2-C	3.39e-05	5.44815	up	chr1	+	149858524	149858961
uc001rhc.2	BC041929	0.000774	4.23224	down	UCSC_knowngene	1355	chr12	+	26287896	26334216	downstream	NM_001135823	SSPN	sarcospan isoform 2	0.0036647	5.01294	up	chr12	+	26348268	26387708
BC017416		7.37665e-05	13.3933	up	misc_RNA	1439	chr12	-	68820110	68821517	upstream	NM_001010942	RAP1B	ras-related protein Rap-1b precursor	0.000117	4.16483	up	chr12	+	69004651	69054374
uc003klp.2	FIS	0.0229709	3.36627	down	UCSC_knowngene	2049	chr5	+	95187935	95195834	upstream	NM_173362	RFESD	Rieske domain-containing protein isoform 2	0.00128	2.50653	down	chr5	+	94982582	94992849
NR_026936	C5orf27	0.000200544	5.95672	down	RefSeq_NR	1931	chr5	+	95187935	95195834	upstream	NM_173362	RFESD	Rieske domain-containing protein isoform 2	0.00128	2.50653	down	chr5	+	94982582	94992849
BM956062	lincRNA-PGS1	3.87e-05	5.44992	up	lincRNA	174	chr17	+	76360558	76360732	upstream	NM_003258	TK1	thymidine kinase, cytosolic	7.98e-07	7.13525	up	chr17	-	76170159	76183285
AK021484	lincRNA-SYNPO2	1.12e-06	10.3392	up	lincRNA	3422	chr4	+	119672345	119956974	upstream	NM_020961	METTL14	methyltransferase-like protein 14	1.66e-06	2.58867	up	chr4	+	119606573	119632077
ENST00000507589	AC025370.2	0.0215327	2.41848	down	Ensembl	2742	chr8	+	104255772	104258560	downstream	NM_138455	CTHRC1	collagen triple helix repeat-containing protein	5.74e-05	9.55455	up	chr8	+	104383785	104395217
AK126983		0.000257491	2.41018	down	misc_RNA	5637	chr22	-	24243618	24249255	downstream	NM_003073	SMARCB1	SWI/SNF-related matrix-associated	2.14021e-06	2.73206	up	chr22	+	24129149	24176705
ENST00000439492	AP000350.6	0.00576	2.21717	up	Ensembl	1763	chr22	+	24269086	24271761	upstream	NM_003073	SMARCB1	SWI/SNF-related matrix-associated	2.14021e-06	2.73206	up	chr22	+	24129149	24176705
ENST00000432147	RP4-735C1.5	0.000436622	5.64087	up	Ensembl	355	chr1	-	110353265	110353620	downstream	NM_000851	GSTM5	glutathione S-transferase Mu 5	1.41e-05	23.9886	down	chr1	+	110254863	110260890
ENST00000452381	AC064834.2	1.09684e-05	3.03124	down	Ensembl	850	chr2	+	196397758	196403405	downstream	NM_020342	SLC39A10	zinc transporter ZIP10 precursor	0.00468671	6.77218	up	chr2	+	196521851	196602426
chr11:2448349-2458849-	lincRNA-TRPM5	0.00717	2.00678	down	lincRNA	10501	chr11	-	2448349	2458849	downstream	NM_139022	TSPAN32	tetraspanin-32	1e-05	8.46713	down	chr11	+	2323242	2339430
DA922283	lincRNA-TH	2.84e-06	4.51524	up	lincRNA	568	chr11	-	2229882	2230451	upstream	NM_139022	TSPAN32	tetraspanin-32	1e-05	8.46713	down	chr11	+	2323242	2339430
ENST00000447571	AC079807.4	0.005	8.05097	up	Ensembl	1808	chr2	-	48168834	48468122	upstream	NM_001135629	KLRAQ1	KLRAQ motif-containing protein 1 isoform 1	0.00246	3.06411	up	chr2	+	48667907	48742531
BM728564	lincRNA-HHAT	0.00543782	2.34916	down	lincRNA	568	chr1	+	210425878	210426445	upstream	NM_001146262	SYT14	synaptotagmin-14 isoform 3	0.005139	2.79383	down	chr1	+	210111537	210337633
chr7:73684091-73687309-	lincRNA-RFC2	0.00426369	2.57351	down	lincRNA	3219	chr7	-	73684091	73687309	downstream	NM_001081752	ELN	elastin isoform b precursor	0.0179	2.10763	down	chr7	+	73442426	73484236
ENST00000428294	RP3-449O17.1	5.24089e-05	2.09449	down	Ensembl	700	chr22	-	38731766	38794921	downstream	NM_001161572	MAFF	transcription factor MafF isoform a	0.00151	4.74951	up	chr22	+	38597938	38612517
AX747492	lincRNA-HFE2	0.000421	2.27261	up	lincRNA	4510	chr1	+	145209144	146424095	overlap	NM_001039703	NBPF10	neuroblastoma breakpoint family member 10	0.000314	2.40814	up	chr1	+	145293370	145368684
DA955413	lincRNA-FAM65A-1	0.00291443	9.96079	down	lincRNA	562	chr16	+	67552113	67552675	downstream	NM_032140	C16orf48	hypothetical protein LOC84080	6.38972e-05	6.89961	down	chr16	-	67696849	67700628
BG210561	lincRNA-AGRP-2	0.00914839	2.70641	down	lincRNA	697	chr16	-	67551608	67552290	upstream	NM_032140	C16orf48	hypothetical protein LOC84080	6.38972e-05	6.89961	down	chr16	-	67696849	67700628
CN315150	lincRNA-FAM65A-3	0.00798124	2.00774	down	lincRNA	705	chr16	+	67536554	67537247	downstream	NM_032140	C16orf48	hypothetical protein LOC84080	6.38972e-05	6.89961	down	chr16	-	67696849	67700628
AK057313	lincRNA-PTPN4	4.13512e-06	8.88852	down	lincRNA	2048	chr2	+	120436774	120481191	upstream	NM_183240	TMEM37	voltage-dependent calcium channel gamma-like	7.13e-05	2.05142	up	chr2	+	120189445	120196096
AI218855	lincRNA-RPS14-2	5.66868e-06	5.93691	down	lincRNA	269	chr5	-	149855120	149864849	downstream	NM_001804	CDX1	homeobox protein CDX-1	4.29075e-05	7.2401	down	chr5	+	149546343	149564121
EB386665	lincRNA-SLN	0.0129	4.04615	up	lincRNA	821	chr11	-	107644071	107644892	upstream	NM_003478	CUL5	cullin-5	0.00274	2.57437	up	chr11	+	107879407	107978488
AK021739	lincRNA-JAK2-2	0.0046	2.00284	up	lincRNA	1879	chr9	+	4860453	4885917	overlap	NM_005772	RCL1	RNA 3'-terminal phosphate cyclase-like protein	7.02e-06	6.21146	up	chr9	+	4792833	4861064
AI553950	lincRNA-INSL6	0.0121	4.18977	up	lincRNA	449	chr9	+	5131978	5164252	upstream	NM_005772	RCL1	RNA 3'-terminal phosphate cyclase-like protein	7.02e-06	6.21146	up	chr9	+	4792833	4861064
BX098775	lincRNA-JAK2-1	0.00166	6.38976	up	lincRNA	478	chr9	-	5132032	5165921	downstream	NM_005772	RCL1	RNA 3'-terminal phosphate cyclase-like protein	7.02e-06	6.21146	up	chr9	+	4792833	4861064
AW086055	lincRNA-PRRC2C	5.8e-06	2.51887	up	lincRNA	378	chr1	-	171562278	171562866	upstream	NM_001007239	METTL13	methyltransferase-like protein 13 isoform 3	0.00154	2.14654	up	chr1	+	171750760	171766856
ENST00000446107	RP11-168P8.3	0.00362182	4.84511	down	Ensembl	513	chr10	+	44407891	44409684	upstream	NM_145312	ZNF485	zinc finger protein 485	0.00109	2.17833	up	chr10	+	44101854	44113352
AW086055	lincRNA-PRRC2C	5.8e-06	2.51887	up	lincRNA	378	chr1	-	171562278	171562866	upstream	NM_001136127	DNM3	dynamin-3 isoform b	0.000115	3.11347	up	chr1	+	171810620	172381857
NR_021491	FLJ42709	0.000863	2.40036	down	RefSeq_NR	1184	chr5	-	92746501	92916953	upstream	NM_005654	NR2F1	COUP transcription factor 1	1.05e-06	25.5918	down	chr5	+	92919042	92929786
uc003kkf.2	FLJ42709	0.00189603	3.27681	down	UCSC_knowngene	2792	chr5	-	92745064	92917003	upstream	NM_005654	NR2F1	COUP transcription factor 1	1.05e-06	25.5918	down	chr5	+	92919042	92929786
AK297077	lincRNA-FYB	7.30475e-05	2.24415	up	lincRNA	2747	chr5	-	39107403	39270759	upstream	NM_001343	DAB2	disabled homolog 2	0.000981	2.1948	up	chr5	-	39371779	39425335
NR_027697	FLJ39653	0.028	2.19829	up	RefSeq_NR	2496	chr4	+	16228285	16259810	upstream	NM_001145848	PROM1	prominin-1 isoform 2	1.6e-05	42.1733	down	chr4	-	15969848	16085623
NR_027696	FLJ39653	0.00807	5.52713	up	RefSeq_NR	2547	chr4	+	16228285	16259810	upstream	NM_001145848	PROM1	prominin-1 isoform 2	1.6e-05	42.1733	down	chr4	-	15969848	16085623
ENST00000439492	AP000350.6	0.00576	2.21717	up	Ensembl	1763	chr22	+	24269086	24271761	upstream	NM_002415	MIF	macrophage migration inhibitory factor	8.63e-07	3.38828	up	chr22	+	24236564	24237409
AK126983		0.000257491	2.41018	down	misc_RNA	5637	chr22	-	24243618	24249255	downstream	NM_002415	MIF	macrophage migration inhibitory factor	8.63e-07	3.38828	up	chr22	+	24236564	24237409
uc002tkz.1	CR601322	0.00338787	2.96963	down	UCSC_knowngene	844	chr2	+	114737145	114764879	upstream	NM_025181	SLC35F5	solute carrier family 35 member F5	0.000107	2.13466	up	chr2	-	114471932	114514400
AW387651	lincRNA-TFE3	0.000940549	2.10775	down	lincRNA	232	chrX	-	48903267	49031062	downstream	NM_006044	HDAC6	histone deacetylase 6	0.00642	2.12987	up	chrX	+	48660486	48683380
AK090904		0.000126	2.25124	up	RNAdb	2547	chr4	+	128759331	128761879	downstream	NM_178043	LARP1B	la-related protein 1B isoform 2	0.00161	3.06433	up	chr4	+	128982502	129043507
uc003ifn.2	AK090904	3.39e-05	4.78979	up	UCSC_knowngene	2962	chr4	+	128758921	128761883	downstream	NM_178043	LARP1B	la-related protein 1B isoform 2	0.00161	3.06433	up	chr4	+	128982502	129043507
ENST00000512349	CTD-2313F11.2	0.000355563	2.00684	down	Ensembl	591	chr5	+	54350255	54350968	downstream	NM_001170402	CDC20B	cell division cycle protein 20 homolog B isoform	0.0101655	5.10323	down	chr5	-	54408798	54469005
ENST00000440088	AC090421.1	0.000102181	2.84706	down	Ensembl	2029	chr7	-	77286976	77325582	downstream	NM_001131008	PTPN12	tyrosine-protein phosphatase non-receptor type	1.32633e-05	5.6201	up	chr7	+	77167351	77269388
ENST00000444862	AP005273.1	0.000428231	3.51908	down	Ensembl	522	chr11	+	64268324	64272858	upstream	NM_057092	FKBP2	peptidyl-prolyl cis-trans isomerase FKBP2	1.33e-05	4.95266	down	chr11	+	64009587	64011607
ENST00000502790	RP11-692D12.1	3.73649e-05	2.65741	down	Ensembl	685	chr4	+	74124925	74183670	downstream	NM_000477	ALB	serum albumin preproprotein	0.000721499	2.38321	down	chr4	+	74269971	74287129
CR595169		1.26945e-05	5.73178	up	RNAdb	1493	chr1	-	173833394	173836186	upstream	NM_014857	RABGAP1L	rab GTPase-activating protein 1-like isoform A	0.000971233	2.00589	down	chr1	+	174128633	174927327
uc001gjk.2	GAS5	1.08e-05	2.94969	up	UCSC_knowngene	1695	chr1	-	173833039	173837125	upstream	NM_014857	RABGAP1L	rab GTPase-activating protein 1-like isoform A	0.000971233	2.00589	down	chr1	+	174128633	174927327
DB525109	lincRNA-CENPW-1	0.0252594	2.30003	down	lincRNA	483	chr6	+	126397593	126398803	upstream	NM_138571	HINT3	histidine triad nucleotide-binding protein 3	0.000164	2.06978	up	chr6	+	126277860	126301389
ENST00000423943	RP11-48O20.4	1.03e-06	8.46551	down	Ensembl	1113	chr1	+	159931013	159948851	upstream	NM_001135050	IGSF9	protein turtle homolog A isoform a	0.00908313	2.21097	down	chr1	-	159896828	159915386
uc001fuu.2	AF088076	0.0113	2.45427	down	UCSC_knowngene	423	chr1	+	159931073	159946734	upstream	NM_001135050	IGSF9	protein turtle homolog A isoform a	0.00908313	2.21097	down	chr1	-	159896828	159915386
NR_026862	PPP1R3E	8.23074e-05	2.08289	down	RefSeq_NR	4521	chr14	-	23765112	23772057	downstream	NM_001099780	PSMB11	proteasome subunit beta type-11 precursor	0.000244	2.03914	down	chr14	+	23511375	23513269
AK057381		4.3e-05	2.17512	up	misc_RNA	1873	chr14	+	23763060	23764935	upstream	NM_001099780	PSMB11	proteasome subunit beta type-11 precursor	0.000244	2.03914	down	chr14	+	23511375	23513269
uc003xjb.2	BC034319	7.35e-05	6.39098	up	UCSC_knowngene	837	chr8	+	32785487	32902372	upstream	NM_001160008	NRG1	pro-neuregulin-1, membrane-bound isoform isoform	0.000107	22.4797	down	chr8	+	32405727	32618507
BM909110	lincRNA-KLHDC4	0.00421514	2.01027	down	lincRNA	1172	chr16	-	87813676	87840082	upstream	NM_001173539	BANP	protein BANP isoform c	0.00619	2.12528	up	chr16	+	87985037	88110924
AK299029	lincRNA-RAPGEF3	4.88731e-05	4.05951	down	lincRNA	2776	chr12	-	48131323	48164823	upstream	NM_001143843	TMEM106C	transmembrane protein 106C isoform b	6.69e-05	2.73941	up	chr12	+	48357329	48362661
BC002759	lincRNA-SLC48A1	4.00401e-06	2.35548	down	lincRNA	1041	chr12	+	48165369	48176533	downstream	NM_001143843	TMEM106C	transmembrane protein 106C isoform b	6.69e-05	2.73941	up	chr12	+	48357329	48362661
ENST00000423943	RP11-48O20.4	1.03e-06	8.46551	down	Ensembl	1113	chr1	+	159931013	159948851	upstream	NM_003564	TAGLN2	transgelin-2	0.000135	4.478	up	chr1	-	159887902	159895284
uc001fuu.2	AF088076	0.0113	2.45427	down	UCSC_knowngene	423	chr1	+	159931073	159946734	upstream	NM_003564	TAGLN2	transgelin-2	0.000135	4.478	up	chr1	-	159887902	159895284
AK056959	lincRNA-C4orf26	3.91291e-05	2.74437	down	lincRNA	1122	chr4	+	76439682	76472540	downstream	NM_003715	USO1	general vesicular transport factor p115	6.52e-06	6.37668	up	chr4	+	76649828	76735366
AW387651	lincRNA-TFE3	0.000940549	2.10775	down	lincRNA	232	chrX	-	48903267	49031062	overlap	NM_001163322	CCDC120	coiled-coil domain-containing protein 120	4.32e-05	2.30512	down	chrX	+	48916515	48927510
ENST00000503113	CTD-2245E15.3	0.0163	3.12756	down	Ensembl	692	chr5	-	1544221	1551825	downstream	NM_001044	SLC6A3	sodium-dependent dopamine transporter	2.48429e-05	4.69552	down	chr5	-	1392904	1445543
AK021576		0.001	3.46748	up	NRED	2136	chr13	-	79890367	79924372	upstream	NM_001161407	NDFIP2	NEDD4 family-interacting protein 2 isoform 2	1.14e-05	3.6874	up	chr13	+	80055258	80130212
uc003fux.1	AK128346	0.000189595	3.04856	down	UCSC_knowngene	2732	chr3	+	195426821	195438745	downstream	NM_001010938	TNK2	activated CDC42 kinase 1 isoform 2	0.000599	5.76801	up	chr3	-	195590235	195622432
AK126698		1.4043e-05	2.56367	down	RNAdb	3826	chr3	+	195442310	195446106	downstream	NM_001010938	TNK2	activated CDC42 kinase 1 isoform 2	0.000599	5.76801	up	chr3	-	195590235	195622432
AW364455	lincRNA-C16orf45	0.0225231	2.24637	down	lincRNA	535	chr16	+	15462374	16047393	overlap	NM_001128423	MPV17L	mpv17-like protein isoform 1	0.000277205	2.47092	up	chr16	+	15489610	15503543
ENST00000507589	AC025370.2	0.0215327	2.41848	down	Ensembl	2742	chr8	+	104255772	104258560	downstream	NM_001100117	RIMS2	regulating synaptic membrane exocytosis protein	0.00745983	3.12459	down	chr8	+	104512975	105266656
NR_026938	LOC221442	0.000409105	3.45189	down	RefSeq_NR	4585	chr6	+	41068772	41108567	downstream	NM_004828	NCR2	natural cytotoxicity triggering receptor 2	0.0158	2.0655	down	chr6	+	41303527	41318625
ENST00000440194	RP11-328M4.2	0.000572	6.79223	up	Ensembl	196	chr6	-	41462590	41513981	downstream	NM_004828	NCR2	natural cytotoxicity triggering receptor 2	0.0158	2.0655	down	chr6	+	41303527	41318625
BC070168	lincRNA-TSPAN8	1.93609e-06	137.802	down	lincRNA	1543	chr12	-	71518868	71835678	overlap	NM_004616	TSPAN8	tetraspanin-8	1.20912e-07	140.207	down	chr12	-	71518876	71551779
AF052103		6.26334e-05	2.43173	down	NRED	1329	chr16	+	85399033	85400344	upstream	NM_198491	FAM92B	hypothetical protein LOC339145	1.90481e-07	110.872	down	chr16	-	85131964	85146114
ENST00000506596	ANKDD1B	0.000163418	25.4049	down	Ensembl	1815	chr5	+	74907300	74967671	upstream	NM_000859	HMGCR	3-hydroxy-3-methylglutaryl-Coenzyme A reductase	1.18e-06	3.25149	up	chr5	+	74632992	74657926
chrX:102236694-102253244-	lincRNA-RAB40AL-1	0.00837814	3.74944	down	lincRNA	16551	chrX	-	102236694	102253244	upstream	NM_018476	BEX1	protein BEX1	0.000125082	5.14604	down	chrX	-	102317580	102319168
uc001jef.2	LOC643650	4.46e-05	9.59179	up	UCSC_knowngene	2876	chr10	-	47096454	47151400	downstream	NM_014696	GPRIN2	G protein-regulated inducer of neurite outgrowth	5.18521e-05	30.0045	down	chr10	+	46993545	47000568
BU663229	lincRNA-POU3F1-1	0.000780214	4.14332	down	lincRNA	555	chr1	-	39183439	39183984	upstream	NM_030772	GJA9	gap junction alpha-9 protein	4.1488e-05	4.17477	down	chr1	-	39339738	39347298
AY034104	lincRNA-TACR1-2	9.88e-06	2.3648	up	lincRNA	306	chr2	+	75186481	75252012	downstream	NM_001058	TACR1	substance-P receptor isoform long	6.31e-08	9.81106	down	chr2	-	75273589	75426645
BX101700	lincRNA-TACR1-1	0.00364	3.50979	up	lincRNA	720	chr2	-	75555040	75555760	downstream	NM_001058	TACR1	substance-P receptor isoform long	6.31e-08	9.81106	down	chr2	-	75273589	75426645
AK021484	lincRNA-SYNPO2	1.12e-06	10.3392	up	lincRNA	3422	chr4	+	119672345	119956974	overlap	NM_001128933	SYNPO2	synaptopodin-2 isoform b	0.00024767	3.55884	up	chr4	+	119809995	119959669
ENST00000405197	AC064836.3	0.000264199	4.07084	up	Ensembl	704	chr2	-	203200746	203201450	downstream	NM_001005782	SUMO1	small ubiquitin-related modifier 1 isoform b	0.000359	4.58188	up	chr2	-	203070902	203103322
chr2:202788106-202795396-	lincRNA-CDK15-2	0.0105122	2.848	down	lincRNA	7291	chr2	-	202788106	202795396	upstream	NM_001005782	SUMO1	small ubiquitin-related modifier 1 isoform b	0.000359	4.58188	up	chr2	-	203070902	203103322
CK905913	lincRNA-TTC17-2	0.00018164	2.2201	down	lincRNA	587	chr11	-	43606137	43694943	downstream	NM_001142931	API5	apoptosis inhibitor 5 isoform c	1.09728e-05	3.17087	up	chr11	+	43333504	43366080
AK091103		0.000287653	3.41418	down	misc_RNA	1924	chr4	-	174289045	174290964	downstream	NM_017423	GALNT7	N-acetylgalactosaminyltransferase 7	0.0031	2.86209	up	chr4	+	174089903	174245118
ENST00000501118	AC010733.1	0.0169781	3.34094	down	Ensembl	2828	chr2	+	61159962	61163467	downstream	NM_032506	KIAA1841	KIAA1841 protein isoform b	0.00302141	3.08347	down	chr2	+	61293362	61365169
uc002eoo.1	AK056683	0.000252048	4.37629	down	UCSC_knowngene	2147	chr16	+	66442426	66446038	downstream	NM_001040138	CKLF	chemokine-like factor isoform e	0.00468	2.12994	down	chr16	+	66586465	66600190
ENST00000501118	AC010733.1	0.0169781	3.34094	down	Ensembl	2828	chr2	+	61159962	61163467	upstream	NM_002908	REL	proto-oncogene c-Rel	0.000276	4.05757	up	chr2	+	61108751	61150178
Y00062	lincRNA-ATP6V1G3-2	0.000222	3.57848	down	lincRNA	4597	chr1	+	198284952	198726330	overlap	NM_002838	PTPRC	receptor-type tyrosine-protein phosphatase C	0.0246	2.53026	down	chr1	+	198608136	198726545
chr1:198335952-198347302-	lincRNA-NEK7	0.0182538	2.1637	down	lincRNA	11351	chr1	-	198335952	198347302	upstream	NM_002838	PTPRC	receptor-type tyrosine-protein phosphatase C	0.0246	2.53026	down	chr1	+	198608136	198726545
AX747187	lincRNA-NEDD1-2	0.00176	4.27915	down	lincRNA	2205	chr12	+	96933914	97024344	downstream	NM_152905	NEDD1	protein NEDD1 isoform b	0.0162	48.5715	up	chr12	+	97301000	97347469
CF887548	lincRNA-NEDD1-3	0.000552602	4.47451	down	lincRNA	738	chr12	+	97211559	97269292	downstream	NM_152905	NEDD1	protein NEDD1 isoform b	0.0162	48.5715	up	chr12	+	97301000	97347469
uc001hor.1	CR625980	0.00021	2.54464	down	UCSC_knowngene	1385	chr1	+	224622613	224709674	upstream	NM_001136115	FBXO28	F-box only protein 28 isoform b	0.00152	4.85969	up	chr1	+	224301790	224349749
ENST00000454403	RP11-396A22.4	1.87536e-05	2.71626	up	Ensembl	411	chr13	-	41958908	41959319	upstream	NM_014059	C13orf15	response gene to complement 32 protein	1.88096e-06	4.14718	down	chr13	+	42031541	42045013
AW361687	lincRNA-LNX2	0.0105	2.16931	down	lincRNA	601	chr13	+	28003341	28423867	overlap	NM_002097	GTF3A	transcription factor IIIA	0.000248658	2.41808	down	chr13	+	27998680	28009846
ENST00000430422	RP11-314A15.1	0.00266	3.25704	up	Ensembl	1160	chrX	+	65014186	65015677	downstream	NM_001100431	VSIG4	V-set and immunoglobulin domain-containing	8.94e-06	5.99411	up	chrX	-	65241579	65259967
chr13:112169174-112181374-	lincRNA-C13orf16-3	0.00395162	2.10279	down	lincRNA	12201	chr13	-	112169174	112181374	downstream	NM_145735	ARHGEF7	rho guanine nucleotide exchange factor 7 isoform	0.00135306	5.88646	down	chr13	+	111767623	111947542
chr5:171991045-172004045-	lincRNA-SH3PXD2B	0.00849717	2.65455	down	lincRNA	13001	chr5	-	171991045	172004045	upstream	NM_001142651	NEURL1B	E3 ubiquitin-protein ligase NEURL1B	1.44e-05	2.67603	down	chr5	+	172068275	172118533
chr17:8905860-8924601-	lincRNA-PIK3R5	0.0138095	2.54758	down	lincRNA	18742	chr17	-	8905860	8924601	downstream	NM_152599	MFSD6L	major facilitator superfamily domain-containing	0.00028434	20.8803	down	chr17	-	8700427	8702667
chr17:8905860-8924601+	lincRNA-NTN1	0.00649407	2.04482	down	lincRNA	18742	chr17	+	8905860	8924601	upstream	NM_152599	MFSD6L	major facilitator superfamily domain-containing	0.00028434	20.8803	down	chr17	-	8700427	8702667
uc002vje.1	BC038542	0.00744	2.43	up	UCSC_knowngene	1008	chr2	-	219765535	219795358	downstream	NM_000784	CYP27A1	sterol 26-hydroxylase, mitochondrial precursor	1.62e-05	2.77563	up	chr2	+	219646471	219680016
ENST00000416112	AP001793.1	0.00882979	2.03681	down	Ensembl	1595	chr18	+	8459155	8513727	downstream	NM_001025300	RAB12	ras-related protein Rab-12	0.000832	2.3994	up	chr18	+	8609442	8639380
ENST00000438350	RP11-40H20.3	1.91804e-05	2.98764	up	Ensembl	221	chr1	+	27537754	27537975	upstream	NM_001013642	TRNP1	TMF-regulated nuclear protein 1	2.39752e-06	4.67439	down	chr1	+	27320194	27327377
chr2:223964483-223968702-	lincRNA-KCNE4-1	0.0258132	2.59991	down	lincRNA	4220	chr2	-	223964483	223968702	downstream	NM_080671	KCNE4	potassium voltage-gated channel subfamily E	0.00129335	4.2236	up	chr2	+	223916861	223920355
AK021576		0.001	3.46748	up	NRED	2136	chr13	-	79890367	79924372	overlap	NM_022118	RBM26	RNA-binding protein 26	0.00101	4.64397	up	chr13	-	79894099	79979923
BX102989	lincRNA-SPATA19-2	0.000105	10.0268	up	lincRNA	350	chr11	-	133778893	133781850	upstream	NM_032801	JAM3	junctional adhesion molecule C isoform 1	0.00432	2.3523	up	chr11	+	133938819	134021652
AI553950	lincRNA-INSL6	0.0121	4.18977	up	lincRNA	449	chr9	+	5131978	5164252	downstream	NM_014143	CD274	programmed cell death 1 ligand 1 precursor	0.000217	5.76612	up	chr9	+	5450502	5470567
BC036853	lincRNA-PDCD1LG2-2	5.37e-05	2.69876	up	lincRNA	1660	chr9	-	5357968	5630071	overlap	NM_014143	CD274	programmed cell death 1 ligand 1 precursor	0.000217	5.76612	up	chr9	+	5450502	5470567
BX098775	lincRNA-JAK2-1	0.00166	6.38976	up	lincRNA	478	chr9	-	5132032	5165921	upstream	NM_014143	CD274	programmed cell death 1 ligand 1 precursor	0.000217	5.76612	up	chr9	+	5450502	5470567
AK056779		0.0255327	8.67396	up	misc_RNA	1969	chr8	+	30044816	30047775	downstream	NM_001008711	RBPMS	RNA-binding protein with multiple splicing	0.00201748	2.66718	down	chr8	+	30241943	30429734
BC043564	lincRNA-KCNA2-1	1.06082e-06	39.0053	down	lincRNA	2022	chr1	-	111136202	111174096	upstream	NM_002232	KCNA3	potassium voltage-gated channel subfamily A	0.00150824	4.88361	down	chr1	-	111214309	111217655
uc001pwp.1	AK097820	9.2571e-05	5.53337	down	UCSC_knowngene	1784	chr11	+	119252519	119397374	upstream	NM_014807	C2CD2L	C2 domain-containing protein 2-like	8.49719e-06	3.31591	down	chr11	+	118978092	118987827
ENST00000498979	AP003395.1	0.000237547	3.66403	down	Ensembl	2471	chr11	+	119252534	119371306	upstream	NM_014807	C2CD2L	C2 domain-containing protein 2-like	8.49719e-06	3.31591	down	chr11	+	118978092	118987827
AW139121	lincRNA-DUSP27	0.0159	2.29631	down	lincRNA	577	chr1	-	167390174	167390743	upstream	NM_052862	RCSD1	capZ-interacting protein	2.36e-05	6.07694	down	chr1	+	167599473	167675486
BM680929	lincRNA-PLA2G12B	0.000597718	4.18109	up	lincRNA	520	chr10	-	74761774	74762435	upstream	NM_173348	FAM149B1	hypothetical protein LOC317662	4.92e-05	2.79852	up	chr10	+	74927876	75001939
ENST00000511090	AP003500.1	0.00139591	3.05884	down	Ensembl	973	chr11	-	129482019	129487164	upstream	NM_138788	TMEM45B	transmembrane protein 45B	3.06461e-06	20.1379	down	chr11	+	129685740	129729898
BC029586	lincRNA-UBE2V2-2	1.14982e-07	84.7919	down	lincRNA	1671	chr8	-	49623350	49647793	overlap	NM_024593	EFCAB1	EF-hand calcium-binding domain-containing	0.000534	72.649	down	chr8	-	49635952	49647870
chr11:13920449-13932999-	lincRNA-FAR1	0.00164802	2.74653	down	lincRNA	12551	chr11	-	13920449	13932999	downstream	NM_032228	FAR1	fatty acyl-CoA reductase 1	0.00183	3.20544	up	chr11	+	13690205	13753893
DB298687	lincRNA-ERI1-2	0.000340587	3.69087	down	lincRNA	507	chr8	-	8902238	8902745	downstream	NM_004225	MFHAS1	malignant fibrous histiocytoma-amplified	0.00285	2.36289	up	chr8	-	8641998	8751131
CD518212	lincRNA-PPP1R3B-2	0.00118	4.47395	down	lincRNA	594	chr8	+	8978376	8978955	upstream	NM_004225	MFHAS1	malignant fibrous histiocytoma-amplified	0.00285	2.36289	up	chr8	-	8641998	8751131
BX110722	lincRNA-SGK223-2	0.0158534	2.09987	down	lincRNA	397	chr8	-	8413247	8418475	upstream	NM_004225	MFHAS1	malignant fibrous histiocytoma-amplified	0.00285	2.36289	up	chr8	-	8641998	8751131
EC495588	lincRNA-RCN2	4.05391e-05	3.0039	down	lincRNA	90	chr15	-	77271632	77272065	downstream	NM_002902	RCN2	reticulocalbin-2 precursor	0.000327	2.9107	up	chr15	+	77223961	77242601
chr2:202788106-202795396-	lincRNA-CDK15-2	0.0105122	2.848	down	lincRNA	7291	chr2	-	202788106	202795396	downstream	NM_001044385	ALS2CR4	amyotrophic lateral sclerosis 2 chromosomal	0.0145	2.92082	up	chr2	-	202484906	202508224
exon90+	lincRNA-KNCN	0.00173903	2.53978	down	lincRNA	643	chr1	+	46985867	46986509	upstream	NM_001441	FAAH	fatty-acid amide hydrolase 1	2.32871e-05	4.26426	up	chr1	+	46859938	46879520
AL832122		5.95258e-05	2.07834	down	misc_RNA	5572	chr1	-	23607802	23613245	downstream	NM_015013	KDM1A	lysine-specific histone demethylase 1A isoform	0.000192	2.21815	up	chr1	+	23345940	23410184
uc003klp.2	FIS	0.0229709	3.36627	down	UCSC_knowngene	2049	chr5	+	95187935	95195834	upstream	NM_014899	RHOBTB3	rho-related BTB domain-containing protein 3	5.63e-05	4.93499	up	chr5	+	95066849	95132071
NR_026936	C5orf27	0.000200544	5.95672	down	RefSeq_NR	1931	chr5	+	95187935	95195834	upstream	NM_014899	RHOBTB3	rho-related BTB domain-containing protein 3	5.63e-05	4.93499	up	chr5	+	95066849	95132071
BC038573		0.00318	3.07772	up	misc_RNA	556	chrX	-	46746855	46759139	upstream	NM_153280	UBA1	ubiquitin-like modifier-activating enzyme 1	0.0021877	3.01108	down	chrX	+	47050198	47074527
AW387651	lincRNA-TFE3	0.000940549	2.10775	down	lincRNA	232	chrX	-	48903267	49031062	downstream	NM_001080489	GLOD5	glyoxalase domain-containing protein 5	0.00513544	6.07602	down	chrX	+	48620153	48632064
chr4:25089927-25101952+	lincRNA-SEPSECS-1	1.75e-05	4.78454	down	lincRNA	12026	chr4	+	25089927	25101952	upstream	NM_003102	SOD3	extracellular superoxide dismutase [Cu-Zn]	9.25992e-06	5.86384	down	chr4	+	24797084	24802467
chr2:68206296-68223571-	lincRNA-ETAA1-2	0.0477379	4.71402	down	lincRNA	17276	chr2	-	68206296	68223571	upstream	NM_020143	PNO1	RNA-binding protein PNO1	5.48e-05	2.85544	up	chr2	+	68385004	68403094
ENST00000415726	RP11-336K24.5	0.0269654	4.02359	down	Ensembl	401	chr1	+	155961180	155971578	downstream	NM_199173	BGLAP	osteocalcin preproprotein	0.000243487	3.22724	up	chr1	+	156211950	156213123
chr8:16980864-16988341-	lincRNA-EFHA2-1	0.00373072	2.50315	down	lincRNA	7478	chr8	-	16980864	16988341	upstream	NM_016353	ZDHHC2	palmitoyltransferase ZDHHC2	2.05e-05	2.63448	down	chr8	+	17013835	17080241
DN918054	lincRNA-PDE4B	0.0323	2.05443	down	lincRNA	400	chr1	-	66890612	67423817	upstream	NM_001013674	C1orf141	hypothetical protein LOC400757	3.78124e-06	54.4013	down	chr1	-	67557858	67594220
DN918055	lincRNA-SGIP1	0.00129	2.27115	up	lincRNA	399	chr1	+	66890612	67423817	downstream	NM_001013674	C1orf141	hypothetical protein LOC400757	3.78124e-06	54.4013	down	chr1	-	67557858	67594220
uc001fuu.2	AF088076	0.0113	2.45427	down	UCSC_knowngene	423	chr1	+	159931073	159946734	downstream	NM_000702	ATP1A2	sodium/potassium-transporting ATPase subunit	1.88582e-06	17.7696	down	chr1	+	160085519	160113374
ENST00000423943	RP11-48O20.4	1.03e-06	8.46551	down	Ensembl	1113	chr1	+	159931013	159948851	downstream	NM_000702	ATP1A2	sodium/potassium-transporting ATPase subunit	1.88582e-06	17.7696	down	chr1	+	160085519	160113374
CF887548	lincRNA-NEDD1-3	0.000552602	4.47451	down	lincRNA	738	chr12	+	97211559	97269292	downstream	NM_001135176	NEDD1	protein NEDD1 isoform b	0.00259	10.1104	up	chr12	+	97301000	97347469
AX747187	lincRNA-NEDD1-2	0.00176	4.27915	down	lincRNA	2205	chr12	+	96933914	97024344	downstream	NM_001135176	NEDD1	protein NEDD1 isoform b	0.00259	10.1104	up	chr12	+	97301000	97347469
ENST00000432147	RP4-735C1.5	0.000436622	5.64087	up	Ensembl	355	chr1	-	110353265	110353620	downstream	NM_000561	GSTM1	glutathione S-transferase Mu 1 isoform 1	8.23904e-05	2.27162	down	chr1	+	110230417	110236367
ENST00000419514	RP11-366O17.2	0.000132	29.8249	up	Ensembl	192	chr13	+	43385972	43386428	downstream	NM_033255	EPSTI1	epithelial-stromal interaction protein 1 isoform	1.93e-06	4.38922	up	chr13	-	43462121	43566377
ENST00000450418	AC023480.1	2.01e-05	3.54634	up	Ensembl	2315	chr3	-	4023664	4025979	downstream	NM_020873	LRRN1	leucine-rich repeat neuronal protein 1	0.00146708	26.7949	down	chr3	+	3841120	3889387
BU690073	lincRNA-CCDC33	3.22796e-06	5.76369	down	lincRNA	416	chr15	+	74513616	74513896	upstream	NM_033250	PML	protein PML isoform 11	0.000975641	2.39553	up	chr15	+	74287013	74328735
chr15:74197716-74198633-	lincRNA-TBC1D21-1	0.0227653	2.14238	down	lincRNA	918	chr15	-	74197716	74198633	upstream	NM_033250	PML	protein PML isoform 11	0.000975641	2.39553	up	chr15	+	74287013	74328735
AL079309		0.0237395	2.23592	down	misc_RNA	956	chrX	+	13111778	13112691	upstream	NM_001039091	PRPS2	ribose-phosphate pyrophosphokinase 2 isoform 1	0.000198	3.6005	up	chrX	+	12809473	12842346
BF509048	lincRNA-FAM9C-3	0.00983984	2.17485	down	lincRNA	740	chrX	-	13062942	13158595	downstream	NM_001039091	PRPS2	ribose-phosphate pyrophosphokinase 2 isoform 1	0.000198	3.6005	up	chrX	+	12809473	12842346
AV718641	lincRNA-PMCH	0.0038997	2.12501	down	lincRNA	636	chr12	-	102604245	102604880	downstream	NM_017915	C12orf48	PARP1-binding protein	0.000291477	2.83608	up	chr12	+	102513955	102591298
AK293746	lincRNA-NDST1-2	0.00603	2.44939	up	lincRNA	3451	chr5	+	149877339	149933276	upstream	NM_014228	SLC6A7	sodium-dependent proline transporter	0.00135791	2.16371	down	chr5	+	149569519	149590635
AI218855	lincRNA-RPS14-2	5.66868e-06	5.93691	down	lincRNA	269	chr5	-	149855120	149864849	downstream	NM_014228	SLC6A7	sodium-dependent proline transporter	0.00135791	2.16371	down	chr5	+	149569519	149590635
chr7:73684091-73687309-	lincRNA-RFC2	0.00426369	2.57351	down	lincRNA	3219	chr7	-	73684091	73687309	downstream	NM_032464	LAT2	linker for activation of T-cells family member	3.66192e-05	2.1775	down	chr7	+	73624086	73644164
AW974611	lincRNA-PARP11-4	0.00800727	5.668	down	lincRNA	620	chr12	+	3900214	3900821	downstream	NM_020367	PARP11	poly [ADP-ribose] polymerase 11	0.000218423	2.2254	up	chr12	-	3918026	3982608
BX096603	lincRNA-CCND2-3	5.08998e-05	27.6454	down	lincRNA	733	chr12	+	3980899	4019676	overlap	NM_020367	PARP11	poly [ADP-ribose] polymerase 11	0.000218423	2.2254	up	chr12	-	3918026	3982608
chr8:37531517-37542367+	lincRNA-ZNF703-1	0.00485289	3.50012	down	lincRNA	10851	chr8	+	37531517	37542367	downstream	NM_025069	ZNF703	zinc finger protein 703	7.73897e-05	2.66307	down	chr8	+	37553300	37556396
ENST00000440088	AC090421.1	0.000102181	2.84706	down	Ensembl	2029	chr7	-	77286976	77325582	upstream	NM_001127360	PHTF2	putative homeodomain transcription factor 2	0.00214	3.19942	up	chr7	+	77428108	77553500
EU831898	lincRNA-RPL29	6.03791e-05	5.75385	down	lincRNA	3142	chr3	-	51965892	52258329	upstream	NM_173341	PHF7	PHD finger protein 7 isoform 2	0.000113	2.80083	down	chr3	+	52444526	52457657
BG679513	lincRNA-KCNT2-2	0.00394554	2.56252	up	lincRNA	868	chr1	+	193254821	193255677	upstream	NM_024529	CDC73	parafibromin	0.000348	3.88491	up	chr1	+	193091087	193223942
chr5:141438289-141445854+	lincRNA-NDFIP1	0.0132	2.4618	down	lincRNA	7566	chr5	+	141438289	141445854	downstream	NM_001127496	SPRY4	protein sprouty homolog 4 isoform 2	0.00745598	2.22544	down	chr5	-	141689991	141704620
BM680929	lincRNA-PLA2G12B	0.000597718	4.18109	up	lincRNA	520	chr10	-	74761774	74762435	upstream	NM_016065	MRPS16	28S ribosomal protein S16, mitochondrial	0.000134	2.37002	up	chr10	-	75008600	75012451
chr15:74197716-74198633-	lincRNA-TBC1D21-1	0.0227653	2.14238	down	lincRNA	918	chr15	-	74197716	74198633	upstream	NM_033238	PML	protein PML isoform 1	6.04e-05	2.3563	up	chr15	+	74287013	74340155
BU690073	lincRNA-CCDC33	3.22796e-06	5.76369	down	lincRNA	416	chr15	+	74513616	74513896	upstream	NM_033238	PML	protein PML isoform 1	6.04e-05	2.3563	up	chr15	+	74287013	74340155
ENST00000512322	RP11-792D21.2	0.0051	7.30299	up	Ensembl	2095	chr4	+	79567370	79603853	downstream	NM_001040202	PAQR3	progestin and adipoQ receptor family member 3	0.00146	3.53431	up	chr4	-	79839093	79860582
uc003hlr.1	BC036848	6.73e-05	5.1362	down	UCSC_knowngene	756	chr4	+	79892901	80229698	upstream	NM_001040202	PAQR3	progestin and adipoQ receptor family member 3	0.00146	3.53431	up	chr4	-	79839093	79860582
uc003hlf.2	AK130099	0.000162	7.30029	up	UCSC_knowngene	2778	chr4	+	79567337	79604337	downstream	NM_001040202	PAQR3	progestin and adipoQ receptor family member 3	0.00146	3.53431	up	chr4	-	79839093	79860582
chr3:46129526-46140202+	lincRNA-CCR1	0.00664007	2.03702	down	lincRNA	10677	chr3	+	46129526	46140202	downstream	NM_001123041	CCR2	C-C chemokine receptor type 2 isoform A	8.21e-06	8.95413	down	chr3	+	46395234	46402413
chr1:149731347-149744257-	lincRNA-PPIAL4B-1	0.000942	5.09017	down	lincRNA	12911	chr1	-	149731347	149744257	upstream	NM_000566	FCGR1A	high affinity immunoglobulin gamma Fc receptor I	4.48444e-06	15.9186	up	chr1	+	149754249	149764074
AK291502	lincRNA-HIST2H2BF	0.000477	8.23087	up	lincRNA	1686	chr1	+	149369293	149763584	overlap	NM_000566	FCGR1A	high affinity immunoglobulin gamma Fc receptor I	4.48444e-06	15.9186	up	chr1	+	149754249	149764074
ENST00000402768	RP11-15H7.1	0.00161	2.63794	up	Ensembl	767	chr6	-	139935574	139936341	downstream	NM_001168389	CITED2	cbp/p300-interacting transactivator 2	1.55e-06	19.1373	up	chr6	-	139693396	139695350
ENST00000415252	RP1-3D11.2	0.00198568	2.24706	down	Ensembl	457	chrX	-	106756212	106789051	downstream	NM_001169154	CXorf41	hypothetical protein LOC139212	6.51e-06	29.1113	down	chrX	+	106449861	106487473
NR_027064	PLAC2	0.000959985	2.35962	down	RefSeq_NR	3693	chr19	-	5558179	5568005	upstream	NM_198707	HSD11B1L	hydroxysteroid 11-beta-dehydrogenase 1-like	0.000158336	2.74922	down	chr19	+	5681051	5688533
AK302893	lincRNA-MICAL2-1	0.000509465	4.95114	up	lincRNA	3585	chr11	+	12115542	12284466	downstream	NM_032867	MICALCL	MICAL C-terminal-like protein	4.28899e-05	2.80787	down	chr11	+	12308446	12380691
chr15:74197716-74198633-	lincRNA-TBC1D21-1	0.0227653	2.14238	down	lincRNA	918	chr15	-	74197716	74198633	upstream	NM_005545	ISLR	immunoglobulin superfamily containing	0.0114989	2.07447	down	chr15	+	74466086	74469212
DA857280	lincRNA-SEMA7A	0.0158469	2.61328	down	lincRNA	581	chr15	+	74683148	74683728	upstream	NM_005545	ISLR	immunoglobulin superfamily containing	0.0114989	2.07447	down	chr15	+	74466086	74469212
BU690073	lincRNA-CCDC33	3.22796e-06	5.76369	down	lincRNA	416	chr15	+	74513616	74513896	upstream	NM_005545	ISLR	immunoglobulin superfamily containing	0.0114989	2.07447	down	chr15	+	74466086	74469212
AX747492	lincRNA-HFE2	0.000421	2.27261	up	lincRNA	4510	chr1	+	145209144	146424095	upstream	NM_001002810	PDE4DIP	myomegalin isoform 4	4.16461e-05	2.30837	down	chr1	-	144951760	144995033
chr16:84296674-84307824+	lincRNA-WFDC1	0.0275671	2.28714	down	lincRNA	11151	chr16	+	84296674	84307824	downstream	NM_021197	WFDC1	WAP four-disulfide core domain protein 1	1.03836e-05	2.34237	up	chr16	+	84328400	84363450
ENST00000511512	RP11-71E19.1	0.00188302	2.77938	down	Ensembl	501	chr3	+	125985638	126010122	upstream	NM_012190	ALDH1L1	aldehyde dehydrogenase family 1 member L1	3.82409e-05	49.8161	down	chr3	-	125822407	125899485
AK097728	lincRNA-PRLHR-1	7.9e-05	3.81511	up	lincRNA	1798	chr10	-	120433633	120514558	overlap	NM_153810	C10orf46	chromosome 10 open reading frame 46	0.000824	2.66747	up	chr10	-	120440493	120514758
EU831898	lincRNA-RPL29	6.03791e-05	5.75385	down	lincRNA	3142	chr3	-	51965892	52258329	overlap	NM_000688	ALAS1	5-aminolevulinate synthase, nonspecific,	0.00258523	2.91682	down	chr3	+	52232143	52248343
uc001gjk.2	GAS5	1.08e-05	2.94969	up	UCSC_knowngene	1695	chr1	-	173833039	173837125	downstream	NM_018122	DARS2	aspartyl-tRNA synthetase, mitochondrial	0.00287	5.52752	up	chr1	+	173793796	173827682
CR595169		1.26945e-05	5.73178	up	RNAdb	1493	chr1	-	173833394	173836186	downstream	NM_018122	DARS2	aspartyl-tRNA synthetase, mitochondrial	0.00287	5.52752	up	chr1	+	173793796	173827682
DB525109	lincRNA-CENPW-1	0.0252594	2.30003	down	lincRNA	483	chr6	+	126397593	126398803	upstream	NM_001031712	TRMT11	tRNA guanosine-2'-O-methyltransferase TRM11	6.82e-05	2.04495	up	chr6	+	126307575	126360420
ENST00000512349	CTD-2313F11.2	0.000355563	2.00684	down	Ensembl	591	chr5	+	54350255	54350968	downstream	NM_015360	SKIV2L2	superkiller viralicidic activity 2-like 2	4.39e-05	5.0725	up	chr5	+	54603575	54721409
AK293746	lincRNA-NDST1-2	0.00603	2.44939	up	lincRNA	3451	chr5	+	149877339	149933276	overlap	NM_001543	NDST1	bifunctional heparan sulfate	0.00625	2.87144	up	chr5	+	149887673	149937773
AI218855	lincRNA-RPS14-2	5.66868e-06	5.93691	down	lincRNA	269	chr5	-	149855120	149864849	upstream	NM_001543	NDST1	bifunctional heparan sulfate	0.00625	2.87144	up	chr5	+	149887673	149937773
AF191495	lincRNA-F11R	3.29e-06	3.9419	up	lincRNA	2187	chr1	-	160967605	161008711	downstream	NM_002348	LY9	T-lymphocyte surface antigen Ly-9 isoform a	0.000105	6.33939	down	chr1	+	160765927	160798045
ENST00000502790	RP11-692D12.1	3.73649e-05	2.65741	down	Ensembl	685	chr4	+	74124925	74183670	upstream	NM_173827	COX18	mitochondrial inner membrane protein COX18	0.000236	2.28646	up	chr4	-	73920415	73935472
ENST00000439492	AP000350.6	0.00576	2.21717	up	Ensembl	1763	chr22	+	24269086	24271761	downstream	NM_001084393	DDTL	D-dopachrome decarboxylase-like protein	0.0106	4.20294	up	chr22	+	24309025	24314748
AK126983		0.000257491	2.41018	down	misc_RNA	5637	chr22	-	24243618	24249255	upstream	NM_001084393	DDTL	D-dopachrome decarboxylase-like protein	0.0106	4.20294	up	chr22	+	24309025	24314748
DY655635	lincRNA-C16orf75-2	0.00124	2.61427	down	lincRNA	379	chr16	-	11477618	11478868	downstream	NM_015226	CLEC16A	protein CLEC16A	1.1e-05	3.35445	up	chr16	+	11038344	11276046
ENST00000508179	CTD-2001E22.2	0.000851	4.83869	up	Ensembl	1799	chr5	+	9546311	9550721	upstream	NM_003966	SEMA5A	semaphorin-5A precursor	3.01e-06	6.26234	down	chr5	-	9035137	9546233
ENST00000450559	RP11-576N17.3	0.0017339	2.69792	down	Ensembl	1004	chr4	+	84168330	84169334	upstream	NM_001130715	PLAC8	placenta-specific gene 8 protein	0.00128	4.86078	down	chr4	-	84015306	84035911
uc001pwp.1	AK097820	9.2571e-05	5.53337	down	UCSC_knowngene	1784	chr11	+	119252519	119397374	upstream	NM_021729	VPS11	vacuolar protein sorting-associated protein 11	0.000252902	2.06046	down	chr11	+	118938492	118952688
ENST00000498979	AP003395.1	0.000237547	3.66403	down	Ensembl	2471	chr11	+	119252534	119371306	upstream	NM_021729	VPS11	vacuolar protein sorting-associated protein 11	0.000252902	2.06046	down	chr11	+	118938492	118952688
CN413083	lincRNA-UFC1	2.61e-05	4.7918	up	lincRNA	687	chr1	+	161106389	161107075	downstream	NM_000309	PPOX	protoporphyrinogen oxidase	0.00169109	2.55392	down	chr1	+	161136180	161141010
AF191495	lincRNA-F11R	3.29e-06	3.9419	up	lincRNA	2187	chr1	-	160967605	161008711	upstream	NM_000309	PPOX	protoporphyrinogen oxidase	0.00169109	2.55392	down	chr1	+	161136180	161141010
DC428746	lincRNA-ARHGAP15	3.83e-05	2.31657	down	lincRNA	577	chr2	+	143828536	143986326	upstream	NM_001032998	KYNU	kynureninase isoform b	2.55e-05	6.96238	up	chr2	+	143635194	143747106
BC043564	lincRNA-KCNA2-1	1.06082e-06	39.0053	down	lincRNA	2022	chr1	-	111136202	111174096	upstream	NM_000560	CD53	leukocyte surface antigen CD53	5.01183e-05	3.14249	down	chr1	+	111415721	111442558
AW387651	lincRNA-TFE3	0.000940549	2.10775	down	lincRNA	232	chrX	-	48903267	49031062	upstream	NM_001098411	GAGE2B	G antigen 2B/2C	8.54e-07	3.30601	down	chrX	+	49235707	49242997
exon2911-	lincRNA-AREG	0.0196971	2.18595	down	lincRNA	160	chr4	-	75585748	75585907	downstream	NM_001657	AREG	amphiregulin preproprotein	0.00226061	2.09371	down	chr4	+	75480628	75490485
BG926920	lincRNA-CSNK1A1	0.0141472	2.33194	down	lincRNA	665	chr5	+	148836893	148837488	downstream	NM_001892	CSNK1A1	casein kinase I isoform alpha isoform 2	1.27e-06	2.18032	up	chr5	-	148874844	148931007
chr5:148834826-148846630-	lincRNA-IL17B	0.0148556	2.35878	down	lincRNA	11805	chr5	-	148834826	148846630	upstream	NM_001892	CSNK1A1	casein kinase I isoform alpha isoform 2	1.27e-06	2.18032	up	chr5	-	148874844	148931007
AK095243		4.81e-05	4.57527	up	misc_RNA	2460	chr17	-	39805306	39807765	downstream	NM_153490	KRT13	keratin, type I cytoskeletal 13 isoform a	0.000789103	2.82455	down	chr17	-	39657232	39661865
AK094723		1.71e-05	12.8509	up	misc_RNA	2466	chr17	+	39821817	39824283	upstream	NM_153490	KRT13	keratin, type I cytoskeletal 13 isoform a	0.000789103	2.82455	down	chr17	-	39657232	39661865
DB344658	lincRNA-SH2D4A-1	0.0136323	2.23601	down	lincRNA	568	chr8	+	18899540	18900108	downstream	NM_022071	SH2D4A	SH2 domain-containing protein 4A isoform a	0.00016738	6.52871	down	chr8	+	19171080	19253729
BX110722	lincRNA-SGK223-2	0.0158534	2.09987	down	lincRNA	397	chr8	-	8413247	8418475	upstream	NM_194284	CLDN23	claudin-23	2.00897e-05	2.86886	down	chr8	+	8559665	8561617
ENST00000448776	GS1-124K5.10	0.00179324	2.24807	up	Ensembl	712	chr7	+	65976542	66010053	downstream	NM_153033	KCTD7	BTB/POZ domain-containing protein KCTD7 isoform	0.00434525	3.01861	down	chr7	+	66093867	66108216
BC029586	lincRNA-UBE2V2-2	1.14982e-07	84.7919	down	lincRNA	1671	chr8	-	49623350	49647793	overlap	NM_001142857	EFCAB1	EF-hand calcium-binding domain-containing	1.03881e-05	40.5726	down	chr8	-	49627473	49647870
uc001wxl.2	BC084561	0.00137759	4.23393	down	UCSC_knowngene	2301	chr14	-	50504312	50507947	upstream	NM_001040662	METTL21D	methyltransferase-like protein 21D isoform b	0.000451495	2.93381	up	chr14	-	50575349	50583297
uc003ejk.2	BX537548	0.00515087	4.2269	down	UCSC_knowngene	3078	chr3	-	127199533	127255803	upstream	NM_004526	MCM2	DNA replication licensing factor MCM2	1.5e-05	4.64977	up	chr3	+	127317252	127341278
AK057313	lincRNA-PTPN4	4.13512e-06	8.88852	down	lincRNA	2048	chr2	+	120436774	120481191	upstream	NM_001029996	PCDP1	primary ciliary dyskinesia protein 1	0.000533263	12.2602	down	chr2	+	120302024	120414237
uc002eoo.1	AK056683	0.000252048	4.37629	down	UCSC_knowngene	2147	chr16	+	66442426	66446038	downstream	NM_181296	CMTM1	CKLF-like MARVEL transmembrane domain-containing	0.000541379	3.68788	down	chr16	+	66600293	66613038
chr1:228917027-228938752-	lincRNA-RHOU-6	0.00797747	3.60119	down	lincRNA	21726	chr1	-	228917027	228938752	downstream	NM_175055	HIST3H2BB	histone H2B type 3-B	1.66331e-05	3.2357	down	chr1	+	228645807	228646259
uc002vwf.1	AK056246	0.00750175	2.26257	down	UCSC_knowngene	2341	chr2	-	237968076	237994460	overlap	NM_006710	COPS8	COP9 signalosome complex subunit 8 isoform 1	0.000357	2.24132	up	chr2	+	237994083	238007489
NR_026757	LOC729082	1.45e-05	2.29185	up	RefSeq_NR	1894	chr15	+	41576200	41591794	downstream	NM_001129897	NUSAP1	nucleolar and spindle-associated protein 1	3.39e-05	19.7312	up	chr15	+	41624925	41673248
ENST00000407157	RP3-369A17.2	0.00344679	2.08394	down	Ensembl	560	chr6	-	24750899	24751852	upstream	NM_015895	GMNN	geminin	5.6e-06	4.37162	up	chr6	+	24775163	24786278
ENST00000510784	AL160400.1	0.000316475	2.67985	down	Ensembl	1029	chr6	-	25015180	25042398	downstream	NM_015895	GMNN	geminin	5.6e-06	4.37162	up	chr6	+	24775163	24786278
chrX:102236694-102253244-	lincRNA-RAB40AL-1	0.00837814	3.74944	down	lincRNA	16551	chrX	-	102236694	102253244	downstream	NM_001142529	BHLHB9	protein BHLHb9	1.01765e-05	18.2684	down	chrX	+	102000906	102007369
AK300950	lincRNA-FAM65B-1	7.36512e-07	22.7865	down	lincRNA	2415	chr6	-	24840552	25042246	downstream	NM_015895	GMNN	geminin	5.6e-06	4.37162	up	chr6	+	24775163	24786278
BC002759	lincRNA-SLC48A1	4.00401e-06	2.35548	down	lincRNA	1041	chr12	+	48165369	48176533	downstream	NM_024056	TMEM106C	transmembrane protein 106C isoform a	5.98e-05	3.9197	up	chr12	+	48357329	48362661
AK299029	lincRNA-RAPGEF3	4.88731e-05	4.05951	down	lincRNA	2776	chr12	-	48131323	48164823	upstream	NM_024056	TMEM106C	transmembrane protein 106C isoform a	5.98e-05	3.9197	up	chr12	+	48357329	48362661
EU831898	lincRNA-RPL29	6.03791e-05	5.75385	down	lincRNA	3142	chr3	-	51965892	52258329	upstream	NM_007184	NISCH	nischarin	3.45708e-05	2.7409	down	chr3	+	52489523	52527088
CR599308	lincRNA-AEBP2-2	6.19e-06	6.83374	up	lincRNA	2138	chr12	+	19556999	19672288	overlap	NM_153207	AEBP2	zinc finger protein AEBP2 isoform a	1.22e-05	13.5714	up	chr12	+	19592607	19675173
BC070168	lincRNA-TSPAN8	1.93609e-06	137.802	down	lincRNA	1543	chr12	-	71518868	71835678	upstream	NM_144982	ZFC3H1	zinc finger C3H1 domain-containing protein	0.000119	2.20468	up	chr12	-	72003378	72057749
exon1607+	lincRNA-PPP2R5C-2	0.00506226	2.15416	down	lincRNA	191	chr14	+	102051986	102052176	downstream	NM_178587	PPP2R5C	serine/threonine-protein phosphatase 2A 56 kDa	4.69e-05	2.18541	down	chr14	+	102276139	102378962
BG926920	lincRNA-CSNK1A1	0.0141472	2.33194	down	lincRNA	665	chr5	+	148836893	148837488	downstream	NM_001025105	CSNK1A1	casein kinase I isoform alpha isoform 1	0.000305621	2.10609	up	chr5	-	148874844	148931007
chr5:148834826-148846630-	lincRNA-IL17B	0.0148556	2.35878	down	lincRNA	11805	chr5	-	148834826	148846630	upstream	NM_001025105	CSNK1A1	casein kinase I isoform alpha isoform 1	0.000305621	2.10609	up	chr5	-	148874844	148931007
chr2:223964483-223968702-	lincRNA-KCNE4-1	0.0258132	2.59991	down	lincRNA	4220	chr2	-	223964483	223968702	downstream	NM_203372	ACSL3	long-chain-fatty-acid--CoA ligase 3	0.0059	2.02563	up	chr2	+	223725731	223808119
CK819477	lincRNA-APLN-2	2.56117e-05	6.52508	down	lincRNA	356	chrX	-	128809864	128812318	upstream	NM_018990	SASH3	SAM and SH3 domain-containing protein 3	6.37e-05	2.92574	down	chrX	+	128913891	128929176
BM956062	lincRNA-PGS1	3.87e-05	5.44992	up	lincRNA	174	chr17	+	76360558	76360732	upstream	NM_001012270	BIRC5	baculoviral IAP repeat-containing protein 5	5e-05	23.835	up	chr17	+	76210276	76221716
AW387651	lincRNA-TFE3	0.000940549	2.10775	down	lincRNA	232	chrX	-	48903267	49031062	upstream	NM_001127199	GAGE12D	G antigen 12B/C/D/E	1.05404e-05	2.98881	down	chrX	+	49306324	49313710
BM466146	lincRNA-ZNF396	0.00398061	3.34714	down	lincRNA	793	chr18	-	33026128	33026905	downstream	NM_145756	ZNF396	zinc finger protein 396	1.5e-05	2.14715	down	chr18	-	32946660	32957301
AK293062	lincRNA-GALNT1-2	6.93e-06	5.17148	up	lincRNA	2194	chr18	+	33161002	33290012	upstream	NM_145756	ZNF396	zinc finger protein 396	1.5e-05	2.14715	down	chr18	-	32946660	32957301
BP312547	lincRNA-RBBP8-1	1.11e-05	17.582	up	lincRNA	581	chr18	+	20494080	20548814	overlap	NM_203291	RBBP8	DNA endonuclease RBBP8 isoform a	0.000332	3.39509	up	chr18	+	20513838	20606449
BG679513	lincRNA-KCNT2-2	0.00394554	2.56252	up	lincRNA	868	chr1	+	193254821	193255677	upstream	NM_001173525	TROVE2	60 kDa SS-A/Ro ribonucleoprotein isoform 4	2.19e-05	7.65126	up	chr1	+	193029003	193060906
chr1:181081092-181121244+	lincRNA-CACNA1E-3	0.00130711	6.53316	down	lincRNA	40153	chr1	+	181081092	181121244	upstream	NM_001135669	XPR1	xenotropic and polytropic retrovirus receptor 1	0.00521	2.06498	up	chr1	+	180601145	180859415
BF477013	lincRNA-CACNA1E-4	0.00937945	2.25189	down	lincRNA	168	chr1	+	181065777	181065895	upstream	NM_001135669	XPR1	xenotropic and polytropic retrovirus receptor 1	0.00521	2.06498	up	chr1	+	180601145	180859415
NR_015395	LOC541471	0.00889	2.63529	up	RefSeq_NR	809	chr2	-	112124590	112252692	downstream	NM_138621	BCL2L11	bcl-2-like protein 11 isoform 1	0.00436	2.13869	down	chr2	+	111878490	111926022
uc002the.2	LOC541471	5.87e-05	2.09802	up	UCSC_knowngene	1583	chr2	-	111965358	112252692	downstream	NM_138621	BCL2L11	bcl-2-like protein 11 isoform 1	0.00436	2.13869	down	chr2	+	111878490	111926022
uc002msx.1	AX747405	0.000106636	5.71562	down	UCSC_knowngene	1801	chr19	+	12098431	12138553	upstream	NM_001080493	ZNF823	zinc finger protein 823	0.00125	2.36818	up	chr19	-	11832079	11849760
AK095707		6.57508e-05	2.6202	down	misc_RNA	2984	chr16	+	81421429	81424413	downstream	NM_198390	CMIP	C-Maf-inducing protein isoform C-mip	0.0119	2.56472	down	chr16	+	81478774	81745367
ENST00000457217	RP11-222A5.1	0.00176466	2.33242	down	Ensembl	1809	chr1	+	175846478	175849604	downstream	NM_022457	RFWD2	E3 ubiquitin-protein ligase RFWD2 isoform a	2.55e-05	7.32838	up	chr1	-	175913966	176176370
ENST00000419357	C6orf214	0.00161792	2.12053	down	Ensembl	264	chr6	-	30766430	30798436	upstream	NM_014068	PSORS1C1	psoriasis susceptibility 1 candidate 1	0.000700499	2.18992	down	chr6	+	31082607	31107869
ENST00000452336	RP4-530I15.6	0.0101322	5.52362	down	Ensembl	638	chr20	+	49262007	49276828	downstream	NM_015339	ADNP	activity-dependent neuroprotector homeobox	6.82e-06	4.63735	up	chr20	-	49506882	49547527
chr3:46129526-46140202+	lincRNA-CCR1	0.00664007	2.03702	down	lincRNA	10677	chr3	+	46129526	46140202	downstream	NM_001295	CCR1	C-C chemokine receptor type 1	0.000205	2.8558	up	chr3	-	46243199	46249832
uc001hor.1	CR625980	0.00021	2.54464	down	UCSC_knowngene	1385	chr1	+	224622613	224709674	upstream	NM_015176	FBXO28	F-box only protein 28 isoform a	0.000131	3.13662	up	chr1	+	224301790	224349749
AK094780	lincRNA-GALNTL2-1	2.9e-05	7.99934	up	lincRNA	3105	chr3	+	15935568	16270147	upstream	NM_015199	ANKRD28	serine/threonine-protein phosphatase 6	0.000410491	2.34762	up	chr3	-	15708743	15901053
ENST00000424151	AC006378.3	3.86e-05	2.6098	down	Ensembl	314	chr7	-	93594721	93597702	downstream	NM_021955	GNGT1	guanine nucleotide-binding protein G(T) subunit	0.00186	8.7014	up	chr7	+	93535819	93540485
NR_027064	PLAC2	0.000959985	2.35962	down	RefSeq_NR	3693	chr19	-	5558179	5568005	upstream	NM_033643	RPL36	60S ribosomal protein L36	1.14e-06	3.80635	up	chr19	+	5690271	5691678
BC007632	lincRNA-RIMBP2-1	0.000493	4.83674	up	lincRNA	3902	chr12	-	130916193	131200826	upstream	NM_198827	GPR133	probable G-protein coupled receptor 133	0.00413	4.34143	up	chr12	+	131438451	131626008
AI902205	lincRNA-OXGR1-2	0.000519181	2.57481	down	lincRNA	448	chr13	-	97778688	97779138	upstream	NM_207304	MBNL2	muscleblind-like protein 2 isoform 3	9.04e-06	6.08812	up	chr13	+	97874573	98046374
AY034104	lincRNA-TACR1-2	9.88e-06	2.3648	up	lincRNA	306	chr2	+	75186481	75252012	upstream	NM_000189	HK2	hexokinase-2	0.000524	2.35758	up	chr2	+	75059781	75120481
uc001vca.2	BC039553	0.00011773	7.19713	down	UCSC_knowngene	1141	chr13	-	48870650	48877797	downstream	NM_018283	NUDT15	probable 7,8-dihydro-8-oxoguanine triphosphatase	3.22e-05	2.86527	up	chr13	+	48611702	48621282
BQ045000	lincRNA-NUDT15-1	9.27564e-05	2.77495	up	lincRNA	615	chr13	+	48578770	48611972	overlap	NM_018283	NUDT15	probable 7,8-dihydro-8-oxoguanine triphosphatase	3.22e-05	2.86527	up	chr13	+	48611702	48621282
AI432427	lincRNA-CA6	0.0294	2.861	up	lincRNA	619	chr1	+	8906748	9229411	overlap	NM_001215	CA6	carbonic anhydrase 6 precursor	0.00888	3.41854	down	chr1	+	9005921	9035148
AF191495	lincRNA-F11R	3.29e-06	3.9419	up	lincRNA	2187	chr1	-	160967605	161008711	upstream	NM_001014443	USP21	ubiquitin carboxyl-terminal hydrolase 21	0.000726	3.4101	up	chr1	+	161129253	161135516
CN413083	lincRNA-UFC1	2.61e-05	4.7918	up	lincRNA	687	chr1	+	161106389	161107075	downstream	NM_001014443	USP21	ubiquitin carboxyl-terminal hydrolase 21	0.000726	3.4101	up	chr1	+	161129253	161135516
ENST00000405924	RP3-451B15.3	2.39762e-05	3.64094	up	Ensembl	140	chr6	+	12319684	12319824	upstream	NM_002114	HIVEP1	zinc finger protein 40	1.35e-05	3.79966	up	chr6	+	12012723	12165232
ENST00000417795	AC034220.3	0.01561	2.05057	down	Ensembl	1792	chr5	-	131646977	131705608	overlap	NM_003059	SLC22A4	solute carrier family 22 member 4	1.93e-06	14.8563	down	chr5	+	131630144	131679899
uc010ayj.1	HBT8	9.7319e-06	3.09106	down	UCSC_knowngene	4100	chr15	+	25277533	25281633	upstream	NM_022807	SNRPN	small nuclear ribonucleoprotein-associated	0.00120412	3.21451	down	chr15	+	25068793	25223729
uc001pwp.1	AK097820	9.2571e-05	5.53337	down	UCSC_knowngene	1784	chr11	+	119252519	119397374	upstream	NM_015645	C1QTNF5	complement C1q tumor necrosis factor-related	0.000186	2.63665	up	chr11	-	119209651	119217383
AK129753		0.000254	2.04007	down	misc_RNA	2007	chr11	-	86620031	86622038	upstream	NM_001168724	TMEM135	transmembrane protein 135 isoform 2	0.00357	3.24036	up	chr11	+	86748885	87039876
AW387651	lincRNA-TFE3	0.000940549	2.10775	down	lincRNA	232	chrX	-	48903267	49031062	upstream	NM_001098406	GAGE12J	G antigen 12J	0.00407554	4.16658	down	chrX	+	49178515	49185866
ENST00000498979	AP003395.1	0.000237547	3.66403	down	Ensembl	2471	chr11	+	119252534	119371306	upstream	NM_015645	C1QTNF5	complement C1q tumor necrosis factor-related	0.000186	2.63665	up	chr11	-	119209651	119217383
CK819477	lincRNA-APLN-2	2.56117e-05	6.52508	down	lincRNA	356	chrX	-	128809864	128812318	downstream	NM_000276	OCRL	inositol polyphosphate 5-phosphatase OCRL-1	0.000593	2.52497	up	chrX	+	128674251	128726530
DA955413	lincRNA-FAM65A-1	0.00291443	9.96079	down	lincRNA	562	chr16	+	67552113	67552675	downstream	NM_001013838	RLTPR	leucine-rich repeat-containing protein 16C	2.6594e-06	6.71309	down	chr16	+	67679029	67691472
BG210561	lincRNA-AGRP-2	0.00914839	2.70641	down	lincRNA	697	chr16	-	67551608	67552290	upstream	NM_001013838	RLTPR	leucine-rich repeat-containing protein 16C	2.6594e-06	6.71309	down	chr16	+	67679029	67691472
CN315150	lincRNA-FAM65A-3	0.00798124	2.00774	down	lincRNA	705	chr16	+	67536554	67537247	downstream	NM_001013838	RLTPR	leucine-rich repeat-containing protein 16C	2.6594e-06	6.71309	down	chr16	+	67679029	67691472
ENST00000419357	C6orf214	0.00161792	2.12053	down	Ensembl	264	chr6	-	30766430	30798436	upstream	NM_001010909	MUC21	mucin-21 precursor	5.68e-06	13.4532	down	chr6	+	30951484	30957675
AK095243		4.81e-05	4.57527	up	misc_RNA	2460	chr17	-	39805306	39807765	downstream	NM_002274	KRT13	keratin, type I cytoskeletal 13 isoform b	1.05924e-05	3.77774	down	chr17	-	39657232	39661865
AK094723		1.71e-05	12.8509	up	misc_RNA	2466	chr17	+	39821817	39824283	upstream	NM_002274	KRT13	keratin, type I cytoskeletal 13 isoform b	1.05924e-05	3.77774	down	chr17	-	39657232	39661865
ENST00000512349	CTD-2313F11.2	0.000355563	2.00684	down	Ensembl	591	chr5	+	54350255	54350968	downstream	NM_001145734	CDC20B	cell division cycle protein 20 homolog B isoform	0.0308404	5.71264	down	chr5	-	54408798	54469005
DA330000	lincRNA-CBLN1-2	0.0219	2.35214	up	lincRNA	417	chr16	+	48705761	48706178	upstream	NM_003031	SIAH1	E3 ubiquitin-protein ligase SIAH1 isoform a	0.0268	4.42031	up	chr16	-	48394453	48419229
BQ303919	lincRNA-RGNEF-3	0.0353193	2.06758	down	lincRNA	549	chr5	-	72797022	73644097	overlap	NM_032175	UTP15	U3 small nucleolar RNA-associated protein 15	0.000593	2.17593	up	chr5	+	72861597	72877794
NR_027481	ZNF876P	0.011567	2.46455	up	RefSeq_NR	2621	chr4	+	206388	249771	downstream	NM_001137608	ZNF732	zinc finger protein 732	0.00274255	2.2845	down	chr4	-	264463	289944
AK293062	lincRNA-GALNT1-2	6.93e-06	5.17148	up	lincRNA	2194	chr18	+	33161002	33290012	overlap	NM_020474	GALNT1	polypeptide N-acetylgalactosaminyltransferase 1	1.2e-06	4.52056	up	chr18	+	33234532	33291798
uc010dmv.2	DM004440	0.0116707	3.05985	down	UCSC_knowngene	109	chr18	-	33484780	33484889	downstream	NM_020474	GALNT1	polypeptide N-acetylgalactosaminyltransferase 1	1.2e-06	4.52056	up	chr18	+	33234532	33291798
BM466146	lincRNA-ZNF396	0.00398061	3.34714	down	lincRNA	793	chr18	-	33026128	33026905	upstream	NM_020474	GALNT1	polypeptide N-acetylgalactosaminyltransferase 1	1.2e-06	4.52056	up	chr18	+	33234532	33291798
uc003wyp.1	CR613267	0.000435974	2.32128	down	UCSC_knowngene	2275	chr8	+	17942376	17955126	downstream	NM_001160179	NAT1	arylamine N-acetyltransferase 1 isoform a	3.42979e-05	12.9153	down	chr8	+	18027970	18081198
BG195666	lincRNA-NAT1-1	0.00957825	2.58603	down	lincRNA	580	chr8	+	17984343	17984911	downstream	NM_001160179	NAT1	arylamine N-acetyltransferase 1 isoform a	3.42979e-05	12.9153	down	chr8	+	18027970	18081198
EU831898	lincRNA-RPL29	6.03791e-05	5.75385	down	lincRNA	3142	chr3	-	51965892	52258329	overlap	NM_015407	ABHD14A	abhydrolase domain-containing protein 14A	8.96e-06	2.42277	down	chr3	+	52009041	52015216
NR_024279	FLJ37453	7.84137e-05	3.0481	down	RefSeq_NR	2732	chr1	-	16160709	16174642	upstream	NM_004431	EPHA2	ephrin type-A receptor 2 precursor	0.000976	2.70725	down	chr1	-	16450831	16482582
NR_015367	LOC550643	7.87915e-05	2.71132	down	RefSeq_NR	722	chrX	+	56755717	56844002	upstream	NM_013444	UBQLN2	ubiquilin-2	0.000184	2.91821	up	chrX	+	56590025	56593443
ENST00000374922	RP11-622K12.1	9.80069e-05	3.0407	down	Ensembl	1529	chrX	+	56755691	56844813	upstream	NM_013444	UBQLN2	ubiquilin-2	0.000184	2.91821	up	chrX	+	56590025	56593443
BI495452	lincRNA-KLF8-1	1.4867e-05	8.31804	down	lincRNA	600	chrX	-	56522481	56523074	upstream	NM_013444	UBQLN2	ubiquilin-2	0.000184	2.91821	up	chrX	+	56590025	56593443
ENST00000432147	RP4-735C1.5	0.000436622	5.64087	up	Ensembl	355	chr1	-	110353265	110353620	upstream	NM_033088	FAM40A	hypothetical protein LOC85369	0.000460916	2.09191	down	chr1	+	110577240	110597263
NR_002766	MEG3	0.000142	4.21392	up	RefSeq_NR	1595	chr14	+	101292444	101327358	upstream	NM_024515	WDR25	WD repeat-containing protein 25	0.0252325	2.84115	down	chr14	+	100842832	100996640
NR_033358	MEG3	0.000546	3.17654	up	RefSeq_NR	1735	chr14	+	101292444	101327358	upstream	NM_024515	WDR25	WD repeat-containing protein 25	0.0252325	2.84115	down	chr14	+	100842832	100996640
AX747492	lincRNA-HFE2	0.000421	2.27261	up	lincRNA	4510	chr1	+	145209144	146424095	overlap	NM_144698	ANKRD35	ankyrin repeat domain-containing protein 35	1.08821e-05	13.1348	down	chr1	+	145549208	145568526
CR745936	lincRNA-BANF2-1	0.00093116	2.15308	down	lincRNA	532	chr20	-	17806254	17807629	upstream	NM_052865	C20orf72	hypothetical protein LOC92667	0.000553	2.02878	up	chr20	+	17949761	17971762
AL137390	lincRNA-NKAIN3	0.00024	27.1663	up	lincRNA	1202	chr8	+	62791440	62798121	upstream	NM_001164754	ASPH	aspartyl/asparaginyl beta-hydroxylase isoform j	2.53e-05	4.97746	up	chr8	-	62536268	62627199
chr17:72383376-72409968-	lincRNA-GPR142	0.0113988	2.4275	down	lincRNA	26593	chr17	-	72383376	72409968	downstream	NM_181790	GPR142	probable G-protein coupled receptor 142	7.99e-05	2.87336	up	chr17	+	72363644	72368739
AK131003		1.29e-05	20.6512	up	misc_RNA	689	chr5	+	134973225	134973914	downstream	NM_012159	FBXL21	F-box/LRR-repeat protein 21	0.0185921	3.5356	down	chr5	+	135266005	135277367
AA666059	lincRNA-ERC1	1.5e-05	5.13586	up	lincRNA	395	chr12	-	1650285	1650679	upstream	NM_030775	WNT5B	protein Wnt-5b precursor	3.94e-05	8.74252	up	chr12	+	1726221	1756377
ENST00000452496	ASS1P12	3.05e-05	12.9078	down	Ensembl	1227	chr9	+	32945993	32947220	downstream	NM_001497	B4GALT1	beta-1,4-galactosyltransferase 1	0.00105	3.3229	up	chr9	-	33110638	33167356
ENST00000512710	AL359643.3	0.000260265	3.06868	down	Ensembl	3273	chr6	-	5031989	5054657	downstream	NM_001143970	CDYL	chromodomain Y-like protein isoform d	0.00406	2.68259	up	chr6	+	4836331	4955778
ENST00000503349	RP11-72L22.1	0.0477038	2.14315	down	Ensembl	602	chr5	+	86263137	86433529	downstream	NM_022650	RASA1	ras GTPase-activating protein 1 isoform 2	0.0392	2.31658	up	chr5	+	86564765	86687733
AF289584	lincRNA-NKD1	0.00770905	3.40259	down	lincRNA	2142	chr16	+	50369047	50668127	downstream	NM_153337	SNX20	sorting nexin-20 isoform 2	0.00237	2.37759	down	chr16	-	50700210	50715264
NR_026938	LOC221442	0.000409105	3.45189	down	RefSeq_NR	4585	chr6	+	41068772	41108567	downstream	NM_018965	TREM2	triggering receptor expressed on myeloid cells 2	2.25e-05	11.8787	up	chr6	-	41126245	41130922
uc003wyp.1	CR613267	0.000435974	2.32128	down	UCSC_knowngene	2275	chr8	+	17942376	17955126	downstream	NM_001160172	NAT1	arylamine N-acetyltransferase 1 isoform a	0.000202	2.60725	up	chr8	+	18067617	18081198
BG195666	lincRNA-NAT1-1	0.00957825	2.58603	down	lincRNA	580	chr8	+	17984343	17984911	downstream	NM_001160172	NAT1	arylamine N-acetyltransferase 1 isoform a	0.000202	2.60725	up	chr8	+	18067617	18081198
NR_024149	MEG8	0.000469817	7.27426	down	RefSeq_NR	501	chr14	+	101361106	101373305	upstream	NM_003836	DLK1	protein delta homolog 1 precursor	0.00358244	2.48873	down	chr14	+	101193201	101201467
ENST00000442197	AL132709.9	0.0106	3.1708	up	Ensembl	625	chr14	+	101427363	101433377	upstream	NM_003836	DLK1	protein delta homolog 1 precursor	0.00358244	2.48873	down	chr14	+	101193201	101201467
ENST00000414488	AL132709.5	0.00833	3.27485	up	Ensembl	800	chr14	+	101415314	101424887	upstream	NM_003836	DLK1	protein delta homolog 1 precursor	0.00358244	2.48873	down	chr14	+	101193201	101201467
AF422192		0.00195	2.67357	up	misc_RNA	1422	chr14	+	101359264	101360646	upstream	NM_003836	DLK1	protein delta homolog 1 precursor	0.00358244	2.48873	down	chr14	+	101193201	101201467
NR_002766	MEG3	0.000142	4.21392	up	RefSeq_NR	1595	chr14	+	101292444	101327358	upstream	NM_003836	DLK1	protein delta homolog 1 precursor	0.00358244	2.48873	down	chr14	+	101193201	101201467
NR_033358	MEG3	0.000546	3.17654	up	RefSeq_NR	1735	chr14	+	101292444	101327358	upstream	NM_003836	DLK1	protein delta homolog 1 precursor	0.00358244	2.48873	down	chr14	+	101193201	101201467
BC036602		0.00670267	3.48492	down	RNAdb	1336	chr14	+	101319252	101320560	upstream	NM_003836	DLK1	protein delta homolog 1 precursor	0.00358244	2.48873	down	chr14	+	101193201	101201467
uc001edc.1	BC047723	0.000289	2.09822	up	UCSC_knowngene	1208	chr1	+	113499036	113542118	upstream	NM_001042678	RHOC	rho-related GTP-binding protein RhoC precursor	0.000756121	2.17732	up	chr1	-	113243748	113250025
ENST00000444862	AP005273.1	0.000428231	3.51908	down	Ensembl	522	chr11	+	64268324	64272858	upstream	NM_032251	CCDC88B	coiled-coil domain-containing protein 88B	0.000644976	8.56786	down	chr11	+	64107689	64125006
ENST00000509603	AC104073.1	9.66842e-06	16.4129	down	Ensembl	2001	chr7	-	64600748	65235797	downstream	NM_021148	ZNF273	zinc finger protein 273	0.00139	2.05418	up	chr7	+	64363619	64391955
AL137390	lincRNA-NKAIN3	0.00024	27.1663	up	lincRNA	1202	chr8	+	62791440	62798121	upstream	NM_032466	ASPH	aspartyl/asparaginyl beta-hydroxylase isoform c	1.22768e-05	15.7087	down	chr8	-	62536268	62627199
AK289744	lincRNA-SUN2	1.11e-05	3.72629	down	lincRNA	2725	chr22	-	39131913	39190148	upstream	NM_004900	APOBEC3B	probable DNA dC->dU-editing enzyme APOBEC-3B	0.000198	3.63393	up	chr22	+	39378404	39388783
BP312547	lincRNA-RBBP8-1	1.11e-05	17.582	up	lincRNA	581	chr18	+	20494080	20548814	overlap	NM_203292	RBBP8	DNA endonuclease RBBP8 isoform b	0.00387	6.08698	up	chr18	+	20513838	20606449
uc002vje.1	BC038542	0.00744	2.43	up	UCSC_knowngene	1008	chr2	-	219765535	219795358	downstream	NM_006522	WNT6	protein Wnt-6 precursor	9.7458e-06	9.42227	down	chr2	+	219724545	219738954
ENST00000415509	RP11-338O1.2	0.0282146	2.73801	down	Ensembl	416	chr10	-	125185228	125187156	upstream	NM_153442	GPR26	G-protein coupled receptor 26	8.12e-05	3.35599	down	chr10	+	125425870	125456913
ENST00000415252	RP1-3D11.2	0.00198568	2.24706	down	Ensembl	457	chrX	-	106756212	106789051	downstream	NM_173494	CXorf41	hypothetical protein LOC139212	7.07e-05	41.3611	down	chrX	+	106449861	106487473
AW364455	lincRNA-C16orf45	0.0225231	2.24637	down	lincRNA	535	chr16	+	15462374	16047393	overlap	NM_144600	FOPNL	lisH domain-containing protein FOPNL	5.15e-05	3.55866	up	chr16	-	15959576	15982447
DC428746	lincRNA-ARHGAP15	3.83e-05	2.31657	down	lincRNA	577	chr2	+	143828536	143986326	upstream	NM_003937	KYNU	kynureninase isoform a	2.23e-05	3.91464	up	chr2	+	143635194	143799885
chr4:53257568-53279668-	lincRNA-SPATA18-1	0.0187172	2.54081	down	lincRNA	22101	chr4	-	53257568	53279668	downstream	NM_145263	SPATA18	mitochondria-eating protein	0.000799644	2.99402	down	chr4	+	52917592	52963458
AK097798	lincRNA-ZNF676	0.00014	4.56474	up	lincRNA	2091	chr19	-	22361892	23158666	downstream	NM_033468	ZNF257	zinc finger protein 257	2.60961e-05	3.7186	down	chr19	+	22235265	22273903
ENST00000496067	RP11-180K7.1	5.79566e-05	15.5556	down	Ensembl	2632	chr3	+	112521423	112541911	downstream	NM_138485	GTPBP8	GTP-binding protein 8 isoform 2	0.000298	2.47284	up	chr3	+	112709799	112720221
ENST00000511951	RP11-371F15.3	0.0184235	2.79762	down	Ensembl	282	chr4	-	139741110	139933800	upstream	NM_012118	CCRN4L	nocturnin	3.19798e-07	4.19107	up	chr4	+	139936942	139967095
AK128058	lincRNA-ZNF532	1.69355e-05	2.37725	up	lincRNA	6183	chr18	+	56529831	56653197	upstream	NM_006785	MALT1	mucosa-associated lymphoid tissue lymphoma	0.000215	2.81164	up	chr18	+	56338617	56417370
CN413083	lincRNA-UFC1	2.61e-05	4.7918	up	lincRNA	687	chr1	+	161106389	161107075	downstream	NM_001035512	SDHC	succinate dehydrogenase cytochrome b560 subunit,	0.00149451	2.16143	up	chr1	+	161284165	161334535
AF191495	lincRNA-F11R	3.29e-06	3.9419	up	lincRNA	2187	chr1	-	160967605	161008711	upstream	NM_001035512	SDHC	succinate dehydrogenase cytochrome b560 subunit,	0.00149451	2.16143	up	chr1	+	161284165	161334535
uc010dmv.2	DM004440	0.0116707	3.05985	down	UCSC_knowngene	109	chr18	-	33484780	33484889	upstream	NM_001099406	SLC39A6	zinc transporter ZIP6 isoform 2	0.0019	8.09268	up	chr18	-	33690962	33709357
ENST00000511512	RP11-71E19.1	0.00188302	2.77938	down	Ensembl	501	chr3	+	125985638	126010122	upstream	NM_001012337	ROPN1B	ropporin-1B	1.13534e-06	50.9	down	chr3	+	125688027	125702296
BC002759	lincRNA-SLC48A1	4.00401e-06	2.35548	down	lincRNA	1041	chr12	+	48165369	48176533	overlap	NM_017842	SLC48A1	heme transporter HRG1	0.000504	2.47141	down	chr12	+	48166966	48176536
AK299029	lincRNA-RAPGEF3	4.88731e-05	4.05951	down	lincRNA	2776	chr12	-	48131323	48164823	upstream	NM_017842	SLC48A1	heme transporter HRG1	0.000504	2.47141	down	chr12	+	48166966	48176536
ENST00000420752	RP11-507K13.4	8.49e-05	8.39518	up	Ensembl	1053	chr10	+	50979886	50981345	upstream	NM_001142933	CHAT	choline O-acetyltransferase isoform 3	0.00011864	2.02875	down	chr10	+	50822082	50873150
ENST00000505987	HSP90AA4P	1.51e-05	2.76857	up	Ensembl	2173	chr4	+	88812994	88815167	downstream	NM_000582	SPP1	osteopontin isoform b precursor	0.000759	10.7817	up	chr4	+	88896801	88904563
DA955413	lincRNA-FAM65A-1	0.00291443	9.96079	down	lincRNA	562	chr16	+	67552113	67552675	upstream	NM_000196	HSD11B2	corticosteroid 11-beta-dehydrogenase isozyme 2	2.09e-05	2.1913	down	chr16	+	67465035	67471454
BG210561	lincRNA-AGRP-2	0.00914839	2.70641	down	lincRNA	697	chr16	-	67551608	67552290	downstream	NM_000196	HSD11B2	corticosteroid 11-beta-dehydrogenase isozyme 2	2.09e-05	2.1913	down	chr16	+	67465035	67471454
CN315150	lincRNA-FAM65A-3	0.00798124	2.00774	down	lincRNA	705	chr16	+	67536554	67537247	upstream	NM_000196	HSD11B2	corticosteroid 11-beta-dehydrogenase isozyme 2	2.09e-05	2.1913	down	chr16	+	67465035	67471454
ENST00000424719	RP5-884C9.3	2.26e-05	2.83942	up	Ensembl	338	chr1	-	38546247	38546585	downstream	NM_001031740	MANEAL	glycoprotein endo-alpha-1,2-mannosidase-like	0.00657	5.15095	up	chr1	+	38259773	38267278
chr3:46129526-46140202+	lincRNA-CCR1	0.00664007	2.03702	down	lincRNA	10677	chr3	+	46129526	46140202	upstream	NM_020347	LZTFL1	leucine zipper transcription factor-like protein	0.000541	2.08275	down	chr3	-	45865445	45883621
DB525109	lincRNA-CENPW-1	0.0252594	2.30003	down	lincRNA	483	chr6	+	126397593	126398803	downstream	NM_001012507	CENPW	centromere protein W	3.47e-06	5.11788	up	chr6	+	126661252	126669754
chr3:13577339-13583378-	lincRNA-HDAC11-1	0.00825304	3.04803	down	lincRNA	6040	chr3	-	13577339	13583378	upstream	NM_001004019	FBLN2	fibulin-2 isoform a precursor	0.00532	2.02372	down	chr3	+	13590624	13679922
chr9:81993205-81999034-	lincRNA-PSAT1-1	0.000369093	4.0468	down	lincRNA	5830	chr9	-	81993205	81999034	upstream	NM_007005	TLE4	transducin-like enhancer protein 4	1.01e-05	2.33943	down	chr9	+	82186877	82341656
DN918055	lincRNA-SGIP1	0.00129	2.27115	up	lincRNA	399	chr1	+	66890612	67423817	overlap	NM_032291	SGIP1	SH3-containing GRB2-like protein 3-interacting	2.61e-05	3.05696	up	chr1	+	66999824	67210768
DN918054	lincRNA-PDE4B	0.0323	2.05443	down	lincRNA	400	chr1	-	66890612	67423817	overlap	NM_032291	SGIP1	SH3-containing GRB2-like protein 3-interacting	2.61e-05	3.05696	up	chr1	+	66999824	67210768
chr6:34524172-34539872+	lincRNA-C6orf106	0.00777014	3.17656	up	lincRNA	15701	chr6	+	34524172	34539872	upstream	NM_012391	SPDEF	SAM pointed domain-containing Ets transcription	0.0013769	3.98804	down	chr6	-	34505579	34524091
AK131003		1.29e-05	20.6512	up	misc_RNA	689	chr5	+	134973225	134973914	downstream	NM_145282	SLC25A48	solute carrier family 25 member 48	0.0284612	3.2451	down	chr5	+	135170364	135224326
HIT000395572		0.0112378	2.47295	down	H-invDB	354	chr1	-	200443206	200443559	upstream	NM_203459	CAMSAP1L1	calmodulin-regulated spectrin-associated protein	2.6e-05	5.20314	up	chr1	+	200708685	200829831
uc001xsz.2	BC038792	3.97e-05	7.45905	down	UCSC_knowngene	364	chr14	-	77514515	77547598	upstream	NM_020431	TMEM63C	transmembrane protein 63C	2.89415e-05	6.70041	down	chr14	+	77648101	77725838
DB307107	lincRNA-LRRC32-2	0.00219401	2.08303	down	lincRNA	548	chr11	+	76336505	76337049	downstream	NM_018367	ACER3	alkaline ceramidase 3	0.000675	2.77005	up	chr11	+	76571916	76734850
ENST00000442418	RP11-86H7.1	0.000343526	2.96234	down	Ensembl	748	chr1	-	95104016	95285652	upstream	NM_152487	TMEM56	transmembrane protein 56	2.2e-06	19.6824	down	chr1	+	95582893	95663161
NR_015395	LOC541471	0.00889	2.63529	up	RefSeq_NR	809	chr2	-	112124590	112252692	downstream	NM_207002	BCL2L11	bcl-2-like protein 11 isoform 9	6.60465e-05	6.18781	up	chr2	+	111878490	111886423
uc002the.2	LOC541471	5.87e-05	2.09802	up	UCSC_knowngene	1583	chr2	-	111965358	112252692	downstream	NM_207002	BCL2L11	bcl-2-like protein 11 isoform 9	6.60465e-05	6.18781	up	chr2	+	111878490	111886423
CU444927	lincRNA-MYEOV-2	0.000748327	2.43968	up	lincRNA	742	chr11	-	69059868	69182303	upstream	NM_053056	CCND1	G1/S-specific cyclin-D1	2.94e-05	3.73926	up	chr11	+	69455872	69469242
chr4:25089927-25101952+	lincRNA-SEPSECS-1	1.75e-05	4.78454	down	lincRNA	12026	chr4	+	25089927	25101952	downstream	NM_013367	ANAPC4	anaphase-promoting complex subunit 4	0.0011	2.22792	up	chr4	+	25378847	25420120
AL538236	lincRNA-MAGEE1-1	0.00554794	3.19489	up	lincRNA	1127	chrX	+	75404868	75405949	downstream	NM_020932	MAGEE1	melanoma-associated antigen E1	2.7634e-05	5.89412	down	chrX	+	75648045	75651746
chr3:187039181-187056506-	lincRNA-MASP1	0.026	7.74396	down	lincRNA	17326	chr3	-	187039181	187056506	downstream	NM_001031849	MASP1	mannan-binding lectin serine protease 1 isoform	0.000878245	20.4868	down	chr3	-	186964141	187009810
BF511988	lincRNA-TOMM20-1	0.0109	2.19186	down	lincRNA	521	chr1	+	235062091	235062598	downstream	NM_001161533	RBM34	RNA-binding protein 34 isoform 2	0.000133	3.44101	up	chr1	-	235315802	235324571
uc001nng.1	AX746988	0.00381868	4.19478	down	UCSC_knowngene	2603	chr11	-	58701115	58825925	upstream	NM_001142703	FAM111B	hypothetical protein LOC374393 isoform b	0.00405	4.51225	up	chr11	+	58874657	58894888
uc003fux.1	AK128346	0.000189595	3.04856	down	UCSC_knowngene	2732	chr3	+	195426821	195438745	upstream	NM_001647	APOD	apolipoprotein D precursor	3.22377e-06	5.47499	down	chr3	-	195295572	195311076
AK126698		1.4043e-05	2.56367	down	RNAdb	3826	chr3	+	195442310	195446106	upstream	NM_001647	APOD	apolipoprotein D precursor	3.22377e-06	5.47499	down	chr3	-	195295572	195311076
ENST00000427165	RP11-499O7.5	0.00179598	7.97615	down	Ensembl	609	chr10	-	5164278	5177418	downstream	NM_003739	AKR1C3	aldo-keto reductase family 1 member C3	1.42e-05	6.74947	down	chr10	+	5136567	5149878
DQ269985	lincRNA-AKR1C3-2	2.01327e-06	11.3018	down	lincRNA	972	chr10	+	5005636	5149693	overlap	NM_003739	AKR1C3	aldo-keto reductase family 1 member C3	1.42e-05	6.74947	down	chr10	+	5136567	5149878
ENST00000405197	AC064836.3	0.000264199	4.07084	up	Ensembl	704	chr2	-	203200746	203201450	downstream	NM_001005781	SUMO1	small ubiquitin-related modifier 1 isoform a	0.000545473	2.82535	up	chr2	-	203070902	203103322
chr2:202788106-202795396-	lincRNA-CDK15-2	0.0105122	2.848	down	lincRNA	7291	chr2	-	202788106	202795396	upstream	NM_001005781	SUMO1	small ubiquitin-related modifier 1 isoform a	0.000545473	2.82535	up	chr2	-	203070902	203103322
AK097798	lincRNA-ZNF676	0.00014	4.56474	up	lincRNA	2091	chr19	-	22361892	23158666	overlap	NM_001098626	ZNF98	zinc finger protein 98	0.00243	3.39969	up	chr19	-	22573898	22605148
uc003plc.3	SNHG5	0.000312672	2.37971	down	UCSC_knowngene	1078	chr6	-	86386725	86388440	downstream	NM_006372	SYNCRIP	heterogeneous nuclear ribonucleoprotein Q	3.33e-05	2.70863	up	chr6	-	86323692	86353043
NR_003038	SNHG5	0.000135273	2.14184	down	RefSeq_NR	524	chr6	-	86386725	86388451	downstream	NM_006372	SYNCRIP	heterogeneous nuclear ribonucleoprotein Q	3.33e-05	2.70863	up	chr6	-	86323692	86353043
BQ302800	lincRNA-PRSS38	0.00741	5.78172	up	lincRNA	740	chr1	-	227890324	228285713	upstream	NM_020435	GJC2	gap junction gamma-2 protein	0.000136247	3.4855	down	chr1	+	228337552	228347527
uc003xjb.2	BC034319	7.35e-05	6.39098	up	UCSC_knowngene	837	chr8	+	32785487	32902372	upstream	NM_004495	NRG1	pro-neuregulin-1, membrane-bound isoform isoform	8.94e-06	10.7079	up	chr8	+	32405727	32586136
ENST00000419514	RP11-366O17.2	0.000132	29.8249	up	Ensembl	192	chr13	+	43385972	43386428	downstream	NM_001002264	EPSTI1	epithelial-stromal interaction protein 1 isoform	2.09e-05	8.88592	up	chr13	-	43462121	43566377
ENST00000423943	RP11-48O20.4	1.03e-06	8.46551	down	Ensembl	1113	chr1	+	159931013	159948851	downstream	NM_002857	PEX19	peroxisomal biogenesis factor 19 isoform a	3.02e-05	4.98832	up	chr1	-	160246598	160254941
uc001fuu.2	AF088076	0.0113	2.45427	down	UCSC_knowngene	423	chr1	+	159931073	159946734	downstream	NM_002857	PEX19	peroxisomal biogenesis factor 19 isoform a	3.02e-05	4.98832	up	chr1	-	160246598	160254941
chrX:102236694-102253244-	lincRNA-RAB40AL-1	0.00837814	3.74944	down	lincRNA	16551	chrX	-	102236694	102253244	downstream	NM_001142530	BHLHB9	protein BHLHb9	0.00012812	13.3527	down	chrX	+	102000906	102007369
ENST00000506596	ANKDD1B	0.000163418	25.4049	down	Ensembl	1815	chr5	+	74907300	74967671	upstream	NM_016218	POLK	DNA polymerase kappa	0.00381	2.15121	up	chr5	+	74807656	74895646
AX747492	lincRNA-HFE2	0.000421	2.27261	up	lincRNA	4510	chr1	+	145209144	146424095	overlap	NM_001097612	GPR89A	Golgi pH regulator A isoform 1	6.75864e-06	3.08225	up	chr1	-	145764594	145827103
chr13:95301199-95328649-	lincRNA-GPR180	0.0075622	4.32292	down	lincRNA	27451	chr13	-	95301199	95328649	downstream	NM_180989	GPR180	integral membrane protein GPR180 precursor	0.00172	2.05863	up	chr13	+	95254103	95286899
CB157495	lincRNA-NPVF-2	0.000291453	2.24235	down	lincRNA	608	chr7	-	25988420	25989023	upstream	NM_016587	CBX3	chromobox protein homolog 3	9.67818e-05	4.26664	up	chr7	+	26241323	26253227
uc001nng.1	AX746988	0.00381868	4.19478	down	UCSC_knowngene	2603	chr11	-	58701115	58825925	upstream	NM_001142704	FAM111B	hypothetical protein LOC374393 isoform b	0.00211895	3.60273	up	chr11	+	58874657	58894888
BC075797	lincRNA-SCIN	6.22777e-05	3.29701	down	lincRNA	6925	chr7	+	12596186	12616811	overlap	NM_001112706	SCIN	adseverin isoform 1	0.0284245	2.94008	down	chr7	+	12610202	12693228
DN920247	lincRNA-SCARB2	0.000471954	5.41081	up	lincRNA	527	chr4	-	77102106	77155656	upstream	NM_001136570	FAM47E	hypothetical protein LOC100129583	1.89804e-05	53.977	down	chr4	+	77172852	77204929
AK124936	lincRNA-FAM47E	1.46772e-05	70.3504	down	lincRNA	1624	chr4	+	77135192	77204933	overlap	NM_001136570	FAM47E	hypothetical protein LOC100129583	1.89804e-05	53.977	down	chr4	+	77172852	77204929
NR_026769	PPBPL2	0.0160913	4.51119	down	RefSeq_NR	1362	chr4	-	74919754	74921116	downstream	NM_002620	PF4V1	platelet factor 4 variant	0.0173322	2.5585	down	chr4	+	74719012	74720198
AI609057	lincRNA-LUZP6-1	0.0082686	2.22189	down	lincRNA	417	chr7	+	135585964	135586381	upstream	NM_015135	NUP205	nuclear pore complex protein Nup205	0.000197609	4.65031	up	chr7	+	135242661	135333499
AF191495	lincRNA-F11R	3.29e-06	3.9419	up	lincRNA	2187	chr1	-	160967605	161008711	upstream	NM_001035511	SDHC	succinate dehydrogenase cytochrome b560 subunit,	0.000423	2.29141	up	chr1	+	161284165	161334535
CN413083	lincRNA-UFC1	2.61e-05	4.7918	up	lincRNA	687	chr1	+	161106389	161107075	downstream	NM_001035511	SDHC	succinate dehydrogenase cytochrome b560 subunit,	0.000423	2.29141	up	chr1	+	161284165	161334535
AK057381		4.3e-05	2.17512	up	misc_RNA	1873	chr14	+	23763060	23764935	downstream	NM_172314	IL25	interleukin-25 isoform 2 precursor	0.00221549	2.86275	down	chr14	+	23842017	23845612
NR_026862	PPP1R3E	8.23074e-05	2.08289	down	RefSeq_NR	4521	chr14	-	23765112	23772057	upstream	NM_172314	IL25	interleukin-25 isoform 2 precursor	0.00221549	2.86275	down	chr14	+	23842017	23845612
ENST00000502790	RP11-692D12.1	3.73649e-05	2.65741	down	Ensembl	685	chr4	+	74124925	74183670	downstream	NM_177532	RASSF6	ras association domain-containing protein 6	0.0218052	2.4138	down	chr4	-	74438861	74486134
CD516039	lincRNA-THBS4	0.000213478	2.90667	up	lincRNA	510	chr5	+	79306992	79307717	upstream	NM_153610	CMYA5	cardiomyopathy-associated protein 5	0.000395	5.34862	down	chr5	+	78985658	79096049
AW452601	lincRNA-MTX3	0.000345221	2.59611	down	lincRNA	524	chr5	-	79307192	79307717	downstream	NM_153610	CMYA5	cardiomyopathy-associated protein 5	0.000395	5.34862	down	chr5	+	78985658	79096049
NR_024279	FLJ37453	7.84137e-05	3.0481	down	RefSeq_NR	2732	chr1	-	16160709	16174642	downstream	NM_207348	SLC25A34	solute carrier family 25 member 34	7.31103e-06	2.40869	down	chr1	+	16062808	16067884
ENST00000420752	RP11-507K13.4	8.49e-05	8.39518	up	Ensembl	1053	chr10	+	50979886	50981345	upstream	NM_001042427	C10orf53	hypothetical protein LOC282966 isoform b	0.000406562	5.50092	down	chr10	+	50887683	50902948
uc003che.2	BC040563	4.36784e-06	5.0799	down	UCSC_knowngene	3263	chr3	-	37847343	37903250	upstream	NM_015873	VILL	villin-like protein	2.06e-07	13.2908	down	chr3	+	38035077	38048676
AB051448		0.0151	3.5471	up	NRED	6475	chr22	-	45373647	45476304	downstream	NM_015366	PRR5	proline-rich protein 5 isoform 2	0.000199424	8.54313	down	chr22	+	45072687	45133561
AF289584	lincRNA-NKD1	0.00770905	3.40259	down	lincRNA	2142	chr16	+	50369047	50668127	upstream	NM_182922	HEATR3	HEAT repeat-containing protein 3	0.000779	2.79582	up	chr16	+	50099880	50139375
ENST00000411949	AC006460.2	0.0154	3.07145	up	Ensembl	717	chr2	-	191541760	191573442	upstream	NM_014905	GLS	glutaminase kidney isoform, mitochondrial	0.000845	2.8459	up	chr2	+	191745546	191829776
ENST00000396599	AC005062.3	8.34243e-06	2.07866	down	Ensembl	483	chr7	+	20042387	20042870	upstream	NM_001002926	TWISTNB	DNA-directed RNA polymerase I subunit RPA43	6.11074e-05	3.11417	up	chr7	-	19735084	19748660
BC017416		7.37665e-05	13.3933	up	misc_RNA	1439	chr12	-	68820110	68821517	upstream	NM_020401	NUP107	nuclear pore complex protein Nup107	0.00465	7.03481	up	chr12	+	69080730	69136473
AW892975	lincRNA-AMOTL1-1	0.0269872	2.27201	up	lincRNA	457	chr11	-	94627686	94628135	upstream	NM_144665	SESN3	sestrin-3	0.00365	2.32402	up	chr11	-	94906132	94964246
ENST00000482052	HLA-L	0.00182015	2.14118	up	Ensembl	1765	chr6	+	30227360	30260791	downstream	NM_001090	ABCF1	ATP-binding cassette sub-family F member 1	0.00344776	2.60909	up	chr6	+	30539169	30559309
ENST00000419357	C6orf214	0.00161792	2.12053	down	Ensembl	264	chr6	-	30766430	30798436	downstream	NM_001090	ABCF1	ATP-binding cassette sub-family F member 1	0.00344776	2.60909	up	chr6	+	30539169	30559309
CN413083	lincRNA-UFC1	2.61e-05	4.7918	up	lincRNA	687	chr1	+	161106389	161107075	upstream	NM_152366	KLHDC9	kelch domain-containing protein 9 isoform a	0.00052932	3.0387	down	chr1	+	161068180	161070138
AF191495	lincRNA-F11R	3.29e-06	3.9419	up	lincRNA	2187	chr1	-	160967605	161008711	upstream	NM_152366	KLHDC9	kelch domain-containing protein 9 isoform a	0.00052932	3.0387	down	chr1	+	161068180	161070138
DA922283	lincRNA-TH	2.84e-06	4.51524	up	lincRNA	568	chr11	-	2229882	2230451	downstream	NM_006757	TNNT3	troponin T, fast skeletal muscle isoform 1	0.000227646	3.49852	down	chr11	+	1940798	1959936
ENST00000391359	RP1-122K4.3	0.00127491	12.2074	down	Ensembl	544	chrX	-	13998184	14006939	downstream	NM_001001994	GPM6B	neuronal membrane glycoprotein M6-b isoform 4	0.00278058	2.39796	down	chrX	-	13792092	13956831
ENST00000451822	AP002959.1	0.000257	3.24097	up	Ensembl	1071	chr11	-	121232558	121233631	downstream	NM_006918	SC5DL	lathosterol oxidase	0.000825	2.38164	up	chr11	+	121163387	121184119
BU663229	lincRNA-POU3F1-1	0.000780214	4.14332	down	lincRNA	555	chr1	-	39183439	39183984	upstream	NM_017821	RHBDL2	rhomboid-related protein 2	4.55117e-05	2.188	down	chr1	-	39351478	39407456
BI029614	lincRNA-ERF	0.00147314	2.80695	down	lincRNA	493	chr19	-	42777698	42778182	upstream	NM_173633	TMEM145	transmembrane protein 145	0.0195	2.41372	down	chr19	+	42817476	42829214
BM956062	lincRNA-PGS1	3.87e-05	5.44992	up	lincRNA	174	chr17	+	76360558	76360732	upstream	NM_004710	SYNGR2	synaptogyrin-2	5.09414e-05	2.95644	up	chr17	+	76164670	76169009
uc002scv.1	CR605149	0.00211883	3.92915	down	UCSC_knowngene	1471	chr2	+	64455601	64479960	downstream	NM_014181	HSPC159	galectin-related protein	9.68351e-05	3.25469	up	chr2	+	64681326	64688517
BM466146	lincRNA-ZNF396	0.00398061	3.34714	down	lincRNA	793	chr18	-	33026128	33026905	downstream	NM_006965	ZNF24	zinc finger protein 24	0.000263247	2.04207	up	chr18	-	32912177	32924426
AK293062	lincRNA-GALNT1-2	6.93e-06	5.17148	up	lincRNA	2194	chr18	+	33161002	33290012	upstream	NM_006965	ZNF24	zinc finger protein 24	0.000263247	2.04207	up	chr18	-	32912177	32924426
AK094723		1.71e-05	12.8509	up	misc_RNA	2466	chr17	+	39821817	39824283	upstream	NM_000422	KRT17	keratin, type I cytoskeletal 17	0.00102	2.14767	up	chr17	-	39775691	39780882
AK095243		4.81e-05	4.57527	up	misc_RNA	2460	chr17	-	39805306	39807765	downstream	NM_000422	KRT17	keratin, type I cytoskeletal 17	0.00102	2.14767	up	chr17	-	39775691	39780882
uc001rhc.2	BC041929	0.000774	4.23224	down	UCSC_knowngene	1355	chr12	+	26287896	26334216	upstream	NM_001164747	RASSF8	ras association domain-containing protein 8	0.0338873	3.37466	down	chr12	+	26126687	26225807
AF191495	lincRNA-F11R	3.29e-06	3.9419	up	lincRNA	2187	chr1	-	160967605	161008711	upstream	NM_004106	FCER1G	high affinity immunoglobulin epsilon receptor	7.54615e-05	4.40784	up	chr1	+	161185086	161189038
CN413083	lincRNA-UFC1	2.61e-05	4.7918	up	lincRNA	687	chr1	+	161106389	161107075	downstream	NM_004106	FCER1G	high affinity immunoglobulin epsilon receptor	7.54615e-05	4.40784	up	chr1	+	161185086	161189038
BX098775	lincRNA-JAK2-1	0.00166	6.38976	up	lincRNA	478	chr9	-	5132032	5165921	downstream	NM_004972	JAK2	tyrosine-protein kinase JAK2	0.00642	4.62886	up	chr9	+	4985244	5128183
AK021739	lincRNA-JAK2-2	0.0046	2.00284	up	lincRNA	1879	chr9	+	4860453	4885917	downstream	NM_004972	JAK2	tyrosine-protein kinase JAK2	0.00642	4.62886	up	chr9	+	4985244	5128183
AI553950	lincRNA-INSL6	0.0121	4.18977	up	lincRNA	449	chr9	+	5131978	5164252	upstream	NM_004972	JAK2	tyrosine-protein kinase JAK2	0.00642	4.62886	up	chr9	+	4985244	5128183
BC036853	lincRNA-PDCD1LG2-2	5.37e-05	2.69876	up	lincRNA	1660	chr9	-	5357968	5630071	downstream	NM_004972	JAK2	tyrosine-protein kinase JAK2	0.00642	4.62886	up	chr9	+	4985244	5128183
BG399904	lincRNA-PTHLH-1	0.0103243	2.57919	down	lincRNA	473	chr12	-	28173729	28174202	upstream	NM_018318	CCDC91	coiled-coil domain-containing protein 91	7.85e-05	2.63216	up	chr12	+	28410132	28703099
BF969023	lincRNA-ZNF800	0.00309826	2.17568	down	lincRNA	778	chr7	-	127188015	127188758	upstream	NM_014390	SND1	staphylococcal nuclease domain-containing	0.000434	2.31424	up	chr7	+	127292201	127732659
chr7:127179214-127190764+	lincRNA-GCC1	0.00325728	2.30053	down	lincRNA	11551	chr7	+	127179214	127190764	downstream	NM_014390	SND1	staphylococcal nuclease domain-containing	0.000434	2.31424	up	chr7	+	127292201	127732659
AX747038	lincRNA-BANK1-2	3.71765e-06	54.27	down	lincRNA	3544	chr4	+	102341117	102995967	downstream	NM_001135147	SLC39A8	zinc transporter ZIP8 isoform b	0.000766	3.33099	up	chr4	-	103172197	103266410
DQ269985	lincRNA-AKR1C3-2	2.01327e-06	11.3018	down	lincRNA	972	chr10	+	5005636	5149693	overlap	NM_001353	AKR1C1	aldo-keto reductase family 1 member C1	3.46594e-07	39.5143	down	chr10	+	5005453	5020158
ENST00000427165	RP11-499O7.5	0.00179598	7.97615	down	Ensembl	609	chr10	-	5164278	5177418	downstream	NM_001353	AKR1C1	aldo-keto reductase family 1 member C1	3.46594e-07	39.5143	down	chr10	+	5005453	5020158
chr3:13577339-13583378-	lincRNA-HDAC11-1	0.00825304	3.04803	down	lincRNA	6040	chr3	-	13577339	13583378	upstream	NM_004625	WNT7A	protein Wnt-7a precursor	0.00242	2.39906	down	chr3	-	13860081	13921618
chr1:149731347-149744257-	lincRNA-PPIAL4B-1	0.000942	5.09017	down	lincRNA	12911	chr1	-	149731347	149744257	upstream	NM_001040874	HIST2H2AA4	histone H2A type 2-A	5.82e-05	3.05078	down	chr1	+	149822627	149823161
AK291502	lincRNA-HIST2H2BF	0.000477	8.23087	up	lincRNA	1686	chr1	+	149369293	149763584	downstream	NM_001040874	HIST2H2AA4	histone H2A type 2-A	5.82e-05	3.05078	down	chr1	+	149822627	149823161
NR_026769	PPBPL2	0.0160913	4.51119	down	RefSeq_NR	1362	chr4	-	74919754	74921116	downstream	NM_002993	CXCL6	C-X-C motif chemokine 6	0.00010297	3.31373	up	chr4	+	74702272	74704477
DY655635	lincRNA-C16orf75-2	0.00124	2.61427	down	lincRNA	379	chr16	-	11477618	11478868	upstream	NM_003498	SNN	stannin	2.82305e-06	2.09832	up	chr16	+	11762288	11773015
AK226157	lincRNA-EHF	0.00151181	2.92603	down	lincRNA	4584	chr11	-	34874640	34912288	upstream	NM_001001391	CD44	CD44 antigen isoform 4 precursor	0.000123614	2.31609	down	chr11	+	35160416	35253949
ENST00000407157	RP3-369A17.2	0.00344679	2.08394	down	Ensembl	560	chr6	-	24750899	24751852	upstream	NM_014722	FAM65B	family with sequence similarity 65, member B	0.00129	6.88976	down	chr6	-	24804512	24911195
ENST00000510784	AL160400.1	0.000316475	2.67985	down	Ensembl	1029	chr6	-	25015180	25042398	downstream	NM_014722	FAM65B	family with sequence similarity 65, member B	0.00129	6.88976	down	chr6	-	24804512	24911195
AK300950	lincRNA-FAM65B-1	7.36512e-07	22.7865	down	lincRNA	2415	chr6	-	24840552	25042246	overlap	NM_014722	FAM65B	family with sequence similarity 65, member B	0.00129	6.88976	down	chr6	-	24804512	24911195
ENST00000407157	RP3-369A17.2	0.00344679	2.08394	down	Ensembl	560	chr6	-	24750899	24751852	downstream	NM_001168377	KIAA0319	KIAA0319 isoform d precursor	3.70239e-05	8.85597	down	chr6	-	24544331	24646383
AK300950	lincRNA-FAM65B-1	7.36512e-07	22.7865	down	lincRNA	2415	chr6	-	24840552	25042246	downstream	NM_001168377	KIAA0319	KIAA0319 isoform d precursor	3.70239e-05	8.85597	down	chr6	-	24544331	24646383
AK226157	lincRNA-EHF	0.00151181	2.92603	down	lincRNA	4584	chr11	-	34874640	34912288	upstream	NM_000610	CD44	CD44 antigen isoform 1 precursor	0.000142967	2.54984	up	chr11	+	35160416	35253949
BC029570		0.00241558	2.55848	down	misc_RNA	883	chr11	+	112263840	112412637	upstream	NM_001562	IL18	interleukin-18 proprotein	4.27774e-05	5.21701	down	chr11	-	112013975	112034840
AW993564	lincRNA-MAPK1IP1L-1	0.0107729	5.63083	down	lincRNA	503	chr14	-	55509240	55739892	downstream	NM_001024071	GCH1	GTP cyclohydrolase 1 isoform 3	0.000396	2.73815	up	chr14	-	55308723	55369542
ENST00000435287	RP11-69I8.3	0.000226057	5.8161	down	Ensembl	495	chr6	+	132272085	132398533	upstream	NM_006208	ENPP1	ectonucleotide pyrophosphatase/phosphodiesterase	0.000369008	2.83833	down	chr6	+	132129155	132216295
ENST00000443303	RP3-523C21.1	0.00145148	8.75878	down	Ensembl	569	chr6	+	132455550	132490514	upstream	NM_006208	ENPP1	ectonucleotide pyrophosphatase/phosphodiesterase	0.000369008	2.83833	down	chr6	+	132129155	132216295
AK098583		5.28532e-05	8.81593	down	misc_RNA	1544	chr6	-	132451391	132452935	downstream	NM_006208	ENPP1	ectonucleotide pyrophosphatase/phosphodiesterase	0.000369008	2.83833	down	chr6	+	132129155	132216295
uc003qdd.2	AF086187	0.000137402	2.51823	down	UCSC_knowngene	990	chr6	+	132455117	132490502	upstream	NM_006208	ENPP1	ectonucleotide pyrophosphatase/phosphodiesterase	0.000369008	2.83833	down	chr6	+	132129155	132216295
AA666059	lincRNA-ERC1	1.5e-05	5.13586	up	lincRNA	395	chr12	-	1650285	1650679	upstream	NM_032642	WNT5B	protein Wnt-5b precursor	0.000894973	2.28239	down	chr12	+	1738411	1756378
ENST00000438350	RP11-40H20.3	1.91804e-05	2.98764	up	Ensembl	221	chr1	+	27537754	27537975	downstream	NM_004672	MAP3K6	mitogen-activated protein kinase kinase kinase	1.13389e-05	2.07745	down	chr1	-	27681669	27693337
chr15:74197716-74198633-	lincRNA-TBC1D21-1	0.0227653	2.14238	down	lincRNA	918	chr15	-	74197716	74198633	upstream	NM_201526	ISLR	immunoglobulin superfamily containing	0.000499	2.2032	down	chr15	+	74466904	74469212
BU690073	lincRNA-CCDC33	3.22796e-06	5.76369	down	lincRNA	416	chr15	+	74513616	74513896	upstream	NM_201526	ISLR	immunoglobulin superfamily containing	0.000499	2.2032	down	chr15	+	74466904	74469212
DA857280	lincRNA-SEMA7A	0.0158469	2.61328	down	lincRNA	581	chr15	+	74683148	74683728	upstream	NM_201526	ISLR	immunoglobulin superfamily containing	0.000499	2.2032	down	chr15	+	74466904	74469212
BX101114	lincRNA-ERMN	0.00572313	4.88412	down	lincRNA	796	chr2	-	158215198	158215993	downstream	NM_014568	GALNT5	polypeptide N-acetylgalactosaminyltransferase 5	2.6e-05	2.09206	up	chr2	+	158114339	158167913
ENST00000440570	AC004383.4	0.000169	3.61863	up	Ensembl	760	chrX	-	133677366	133680662	upstream	NM_001170780	FAM122C	hypothetical protein LOC159091 isoform 3	8.88e-05	4.34981	up	chrX	+	133930442	133957015
uc004exm.2	BC007360	2.33e-05	4.18129	up	UCSC_knowngene	646	chrX	-	133678458	133680653	upstream	NM_001170780	FAM122C	hypothetical protein LOC159091 isoform 3	8.88e-05	4.34981	up	chrX	+	133930442	133957015
AI017477	lincRNA-TSN-2	0.048559	4.14646	down	lincRNA	464	chr2	-	122660411	122964834	downstream	NM_004622	TSN	translin	0.000204	2.82133	up	chr2	+	122513120	122525428
uc002eoo.1	AK056683	0.000252048	4.37629	down	UCSC_knowngene	2147	chr16	+	66442426	66446038	downstream	NM_144673	CMTM2	CKLF-like MARVEL transmembrane domain-containing	0.0122	2.09924	down	chr16	+	66613350	66622177
uc002eoo.1	AK056683	0.000252048	4.37629	down	UCSC_knowngene	2147	chr16	+	66442426	66446038	downstream	NM_001136106	BEAN1	protein BEAN1 isoform 2	0.00311	3.35977	down	chr16	+	66460815	66516745
DN918055	lincRNA-SGIP1	0.00129	2.27115	up	lincRNA	399	chr1	+	66890612	67423817	overlap	NM_152665	TCTEX1D1	tctex1 domain-containing protein 1	8.65e-08	27.4385	down	chr1	+	67218139	67244730
DN918054	lincRNA-PDE4B	0.0323	2.05443	down	lincRNA	400	chr1	-	66890612	67423817	overlap	NM_152665	TCTEX1D1	tctex1 domain-containing protein 1	8.65e-08	27.4385	down	chr1	+	67218139	67244730
AW993564	lincRNA-MAPK1IP1L-1	0.0107729	5.63083	down	lincRNA	503	chr14	-	55509240	55739892	downstream	NM_001024070	GCH1	GTP cyclohydrolase 1 isoform 2	0.000316	2.49624	up	chr14	-	55308723	55369542
uc002msx.1	AX747405	0.000106636	5.71562	down	UCSC_knowngene	1801	chr19	+	12098431	12138553	upstream	NM_144566	ZNF700	zinc finger protein 700	0.000412	2.41244	down	chr19	+	12035899	12061578
uc001dps.2	CR609342	0.000523977	2.53708	down	UCSC_knowngene	1003	chr1	-	93730202	93811374	downstream	NM_001164392	MTF2	metal-response element-binding transcription	0.00768	2.22147	up	chr1	+	93544791	93604638
ENST00000444862	AP005273.1	0.000428231	3.51908	down	Ensembl	522	chr11	+	64268324	64272858	upstream	NM_004470	FKBP2	peptidyl-prolyl cis-trans isomerase FKBP2	0.0292	2.24836	down	chr11	+	64008412	64011607
chr20:541348-562112-	lincRNA-CSNK2A1	0.00578805	3.74181	down	lincRNA	20765	chr20	-	541348	562112	downstream	NM_006943	SOX12	transcription factor SOX-12	0.000382	2.60991	up	chr20	+	306238	310867
ENST00000405197	AC064836.3	0.000264199	4.07084	up	Ensembl	704	chr2	-	203200746	203201450	downstream	NM_003507	FZD7	frizzled-7 precursor	9.43922e-05	2.15134	up	chr2	+	202899309	202903160
chr2:202788106-202795396-	lincRNA-CDK15-2	0.0105122	2.848	down	lincRNA	7291	chr2	-	202788106	202795396	upstream	NM_003507	FZD7	frizzled-7 precursor	9.43922e-05	2.15134	up	chr2	+	202899309	202903160
AI609057	lincRNA-LUZP6-1	0.0082686	2.22189	down	lincRNA	417	chr7	+	135585964	135586381	upstream	NM_001130929	PL-5283	PL-5283 protein	3.86e-05	8.81321	up	chr7	+	135347220	135361160
BI495452	lincRNA-KLF8-1	1.4867e-05	8.31804	down	lincRNA	600	chrX	-	56522481	56523074	downstream	NM_007250	KLF8	Krueppel-like factor 8 isoform 1	6.32e-05	4.48647	down	chrX	+	56258821	56314322
AW086055	lincRNA-PRRC2C	5.8e-06	2.51887	up	lincRNA	378	chr1	-	171562278	171562866	upstream	NM_015935	METTL13	methyltransferase-like protein 13 isoform 1	0.000818	2.59722	up	chr1	+	171750760	171766856
ENST00000427165	RP11-499O7.5	0.00179598	7.97615	down	Ensembl	609	chr10	-	5164278	5177418	upstream	NM_001818	AKR1C4	aldo-keto reductase family 1 member C4	2.81e-06	13.2213	down	chr10	+	5238797	5260910
DQ269985	lincRNA-AKR1C3-2	2.01327e-06	11.3018	down	lincRNA	972	chr10	+	5005636	5149693	downstream	NM_001818	AKR1C4	aldo-keto reductase family 1 member C4	2.81e-06	13.2213	down	chr10	+	5238797	5260910
chr20:541348-562112-	lincRNA-CSNK2A1	0.00578805	3.74181	down	lincRNA	20765	chr20	-	541348	562112	upstream	NM_031424	FAM110A	hypothetical protein LOC83541	4.1248e-05	2.07635	down	chr20	+	825284	826922
BE244504	lincRNA-FAM110A	0.016	12.4073	up	lincRNA	447	chr20	-	837118	837565	downstream	NM_031424	FAM110A	hypothetical protein LOC83541	4.1248e-05	2.07635	down	chr20	+	825284	826922
Y00062	lincRNA-ATP6V1G3-2	0.000222	3.57848	down	lincRNA	4597	chr1	+	198284952	198726330	overlap	NM_133494	NEK7	serine/threonine-protein kinase Nek7	1.59e-05	11.2052	up	chr1	+	198126107	198291548
AW993564	lincRNA-MAPK1IP1L-1	0.0107729	5.63083	down	lincRNA	503	chr14	-	55509240	55739892	downstream	NM_000161	GCH1	GTP cyclohydrolase 1 isoform 1	7.70153e-06	3.06687	up	chr14	-	55308723	55369542
AK095707		6.57508e-05	2.6202	down	misc_RNA	2984	chr16	+	81421429	81424413	upstream	NM_017429	BCMO1	beta,beta-carotene 15,15'-monooxygenase	0.00277	3.34463	up	chr16	+	81272295	81324747
exon1607+	lincRNA-PPP2R5C-2	0.00506226	2.15416	down	lincRNA	191	chr14	+	102051986	102052176	downstream	NM_001161726	PPP2R5C	serine/threonine-protein phosphatase 2A 56 kDa	4.6465e-05	2.06604	down	chr14	+	102228134	102394328
AK024938		0.00107	2.04833	up	NRED	1864	chr7	-	132384193	132644331	downstream	NM_001105543	PLXNA4	plexin-A4 isoform 3	0.00911636	2.07172	down	chr7	-	132068246	132261323
ENST00000419357	C6orf214	0.00161792	2.12053	down	Ensembl	264	chr6	-	30766430	30798436	downstream	NM_002714	PPP1R10	serine/threonine-protein phosphatase 1	0.000755	11.9269	up	chr6	-	30568181	30585020
AF052103		6.26334e-05	2.43173	down	NRED	1329	chr16	+	85399033	85400344	downstream	NM_001134473	KIAA0182	genetic suppressor element 1 isoform 2	5.26e-05	6.19642	down	chr16	+	85645028	85709812
ENST00000515077	CTD-2187J20.1	0.00160491	4.06913	down	Ensembl	509	chr5	+	66563849	66566010	upstream	NM_198828	MAST4	microtubule-associated serine/threonine-protein	0.000727	2.7759	down	chr5	+	65892175	66282351
AW993564	lincRNA-MAPK1IP1L-1	0.0107729	5.63083	down	lincRNA	503	chr14	-	55509240	55739892	downstream	NM_001024024	GCH1	GTP cyclohydrolase 1 isoform 1	3.99e-06	2.72511	up	chr14	-	55308723	55369542
AK021739	lincRNA-JAK2-2	0.0046	2.00284	up	lincRNA	1879	chr9	+	4860453	4885917	upstream	NM_004170	SLC1A1	excitatory amino acid transporter 3	5.1e-06	4.327	down	chr9	+	4490426	4587469
uc001xsz.2	BC038792	3.97e-05	7.45905	down	UCSC_knowngene	364	chr14	-	77514515	77547598	upstream	NM_021257	NGB	neuroglobin	0.000181	2.88666	down	chr14	-	77731833	77737655
uc002msx.1	AX747405	0.000106636	5.71562	down	UCSC_knowngene	1801	chr19	+	12098431	12138553	overlap	NM_001080411	ZNF433	zinc finger protein 433	2.9e-06	4.41848	down	chr19	-	12125531	12146525
ENST00000431464	RP11-308D16.4	6.44053e-07	9.03094	down	Ensembl	646	chrX	+	135991633	136103777	upstream	NM_000074	CD40LG	CD40 ligand	0.000968	22.1265	down	chrX	+	135730335	135742549
AK056779		0.0255327	8.67396	up	misc_RNA	1969	chr8	+	30044816	30047775	downstream	NM_001008712	RBPMS	RNA-binding protein with multiple splicing	0.00100185	2.10719	down	chr8	+	30241943	30405029
BQ302800	lincRNA-PRSS38	0.00741	5.78172	up	lincRNA	740	chr1	-	227890324	228285713	upstream	NM_001159391	GUK1	guanylate kinase isoform b	0.000405	2.23153	up	chr1	+	228332403	228336655
chr1:198335952-198347302-	lincRNA-NEK7	0.0182538	2.1637	down	lincRNA	11351	chr1	-	198335952	198347302	downstream	NM_133494	NEK7	serine/threonine-protein kinase Nek7	1.59e-05	11.2052	up	chr1	+	198126107	198291548
BG195666	lincRNA-NAT1-1	0.00957825	2.58603	down	lincRNA	580	chr8	+	17984343	17984911	downstream	NM_001160170	NAT1	arylamine N-acetyltransferase 1 isoform a	0.000703	3.14672	up	chr8	+	18067617	18081198
uc003wyp.1	CR613267	0.000435974	2.32128	down	UCSC_knowngene	2275	chr8	+	17942376	17955126	downstream	NM_001160170	NAT1	arylamine N-acetyltransferase 1 isoform a	0.000703	3.14672	up	chr8	+	18067617	18081198
AX747492	lincRNA-HFE2	0.000421	2.27261	up	lincRNA	4510	chr1	+	145209144	146424095	overlap	NM_032305	POLR3GL	DNA-directed RNA polymerase III subunit	0.000186285	2.08461	down	chr1	-	145456235	145470387
AK095243		4.81e-05	4.57527	up	misc_RNA	2460	chr17	-	39805306	39807765	upstream	NM_031421	TTC25	tetratricopeptide repeat protein 25	3.83e-06	9.52422	down	chr17	+	40086887	40117668
AK094723		1.71e-05	12.8509	up	misc_RNA	2466	chr17	+	39821817	39824283	downstream	NM_031421	TTC25	tetratricopeptide repeat protein 25	3.83e-06	9.52422	down	chr17	+	40086887	40117668
chr5:141438289-141445854+	lincRNA-NDFIP1	0.0132	2.4618	down	lincRNA	7566	chr5	+	141438289	141445854	downstream	NM_030964	SPRY4	protein sprouty homolog 4 isoform 1	0.00129858	3.09487	down	chr5	-	141689991	141704620
ENST00000440570	AC004383.4	0.000169	3.61863	up	Ensembl	760	chrX	-	133677366	133680662	downstream	NM_001101357	CCDC160	coiled-coil domain-containing protein 160	2.41848e-06	23.2262	down	chrX	+	133371076	133379808
uc004exm.2	BC007360	2.33e-05	4.18129	up	UCSC_knowngene	646	chrX	-	133678458	133680653	downstream	NM_001101357	CCDC160	coiled-coil domain-containing protein 160	2.41848e-06	23.2262	down	chrX	+	133371076	133379808
NR_033378	LOC100288428	0.00285076	2.5712	down	RefSeq_NR	2147	chr3	-	8262834	8543344	upstream	NM_014583	LMCD1	LIM and cysteine-rich domains protein 1	0.000256	2.51759	up	chr3	+	8543510	8609806
AK024617		0.000721404	2.53808	down	misc_RNA	1862	chr17	+	37710439	37712286	upstream	NM_015083	CDK12	cyclin-dependent kinase 12 isoform 2	0.00271	6.51997	up	chr17	+	37617738	37690800
BU690073	lincRNA-CCDC33	3.22796e-06	5.76369	down	lincRNA	416	chr15	+	74513616	74513896	downstream	NM_182791	CCDC33	coiled-coil domain-containing protein 33 isoform	5.84e-06	60.667	down	chr15	+	74610899	74628482
DA857280	lincRNA-SEMA7A	0.0158469	2.61328	down	lincRNA	581	chr15	+	74683148	74683728	upstream	NM_182791	CCDC33	coiled-coil domain-containing protein 33 isoform	5.84e-06	60.667	down	chr15	+	74610899	74628482
DN918054	lincRNA-PDE4B	0.0323	2.05443	down	lincRNA	400	chr1	-	66890612	67423817	upstream	NM_144701	IL23R	interleukin-23 receptor precursor	0.0261895	2.72145	down	chr1	+	67632168	67725650
DN918055	lincRNA-SGIP1	0.00129	2.27115	up	lincRNA	399	chr1	+	66890612	67423817	downstream	NM_144701	IL23R	interleukin-23 receptor precursor	0.0261895	2.72145	down	chr1	+	67632168	67725650
uc003wyp.1	CR613267	0.000435974	2.32128	down	UCSC_knowngene	2275	chr8	+	17942376	17955126	downstream	NM_001160174	NAT1	arylamine N-acetyltransferase 1 isoform a	0.00414	5.42946	up	chr8	+	18079176	18081198
BG195666	lincRNA-NAT1-1	0.00957825	2.58603	down	lincRNA	580	chr8	+	17984343	17984911	downstream	NM_001160174	NAT1	arylamine N-acetyltransferase 1 isoform a	0.00414	5.42946	up	chr8	+	18079176	18081198
AK226157	lincRNA-EHF	0.00151181	2.92603	down	lincRNA	4584	chr11	-	34874640	34912288	upstream	NM_003477	PDHX	pyruvate dehydrogenase protein X component,	0.00345	2.35585	up	chr11	+	34937676	35017675
BC075797	lincRNA-SCIN	6.22777e-05	3.29701	down	lincRNA	6925	chr7	+	12596186	12616811	upstream	NM_001135924	VWDE	von Willebrand factor D and EGF	3.60525e-05	3.47969	down	chr7	-	12370508	12443852
BG221985	lincRNA-APOL3	0.00730677	2.92859	down	lincRNA	776	chr22	+	36521981	36524915	downstream	NM_003661	APOL1	apolipoprotein L1 isoform a precursor	0.0169	2.45253	up	chr22	+	36649116	36663577
ENST00000502314	CCT5P1	3.92335e-05	3.3145	up	Ensembl	1618	chr5	+	114847773	114849391	downstream	NM_020177	FEM1C	protein fem-1 homolog C	0.00168	2.34697	up	chr5	-	114856607	114880591
ENST00000503268	CTC-340D7.1	0.000370543	2.96032	down	Ensembl	499	chr5	-	68128411	68257985	upstream	NM_031966	CCNB1	G2/mitotic-specific cyclin-B1	3.4e-06	7.80014	up	chr5	+	68462912	68474070
EU831898	lincRNA-RPL29	6.03791e-05	5.75385	down	lincRNA	3142	chr3	-	51965892	52258329	upstream	NM_145262	GLYCTK	glycerate kinase isoform 1	0.0229913	2.03541	down	chr3	+	52321835	52329272
NR_026757	LOC729082	1.45e-05	2.29185	up	RefSeq_NR	1894	chr15	+	41576200	41591794	downstream	NM_015138	RTF1	RNA polymerase-associated protein RTF1 homolog	0.000821	3.07304	up	chr15	+	41709301	41775761
ENST00000430258	RP1-298J18.1	6.84e-05	2.57687	up	Ensembl	551	chrX	-	110867403	110867954	upstream	NM_018466	ALG13	UDP-N-acetylglucosamine transferase subunit	0.000168	2.11468	up	chrX	+	110924345	110933623
chr16:86616024-86626124-	lincRNA-FOXL1-2	0.0081321	2.80646	down	lincRNA	10101	chr16	-	86616024	86626124	downstream	NM_001451	FOXF1	forkhead box protein F1	0.000180299	2.50099	down	chr16	+	86544132	86548070
CF129145	lincRNA-LOC100506581-1	0.000794334	2.08966	down	lincRNA	521	chr16	+	86616548	86617070	upstream	NM_001451	FOXF1	forkhead box protein F1	0.000180299	2.50099	down	chr16	+	86544132	86548070
ENST00000511951	RP11-371F15.3	0.0184235	2.79762	down	Ensembl	282	chr4	-	139741110	139933800	upstream	NM_201999	ELF2	ETS-related transcription factor Elf-2 isoform	0.00144643	2.08313	up	chr4	-	139978870	140060606
BX647904	lincRNA-ZNF365-2	0.00429	2.15855	up	lincRNA	2954	chr10	+	64018915	64161151	overlap	NM_199451	ZNF365	protein ZNF365 isoform C	0.000279815	2.46091	down	chr10	+	64133915	64431771
uc003wyp.1	CR613267	0.000435974	2.32128	down	UCSC_knowngene	2275	chr8	+	17942376	17955126	upstream	NM_006197	PCM1	pericentriolar material 1 protein	0.000666	2.97042	up	chr8	+	17780365	17887457
BG195666	lincRNA-NAT1-1	0.00957825	2.58603	down	lincRNA	580	chr8	+	17984343	17984911	upstream	NM_006197	PCM1	pericentriolar material 1 protein	0.000666	2.97042	up	chr8	+	17780365	17887457
chr16:84296674-84307824+	lincRNA-WFDC1	0.0275671	2.28714	down	lincRNA	11151	chr16	+	84296674	84307824	upstream	NM_001146051	HSDL1	inactive hydroxysteroid dehydrogenase-like	0.0486	2.28696	up	chr16	-	84155743	84178800
AI902205	lincRNA-OXGR1-2	0.000519181	2.57481	down	lincRNA	448	chr13	-	97778688	97779138	downstream	NM_153456	HS6ST3	heparan-sulfate 6-O-sulfotransferase 3	0.00812	5.55694	down	chr13	+	96743092	97491812
ENST00000447462	RP11-528A4.3	0.0335484	2.8997	down	Ensembl	323	chr3	+	193483469	193483792	upstream	NM_130836	OPA1	dynamin-like 120 kDa protein, mitochondrial	0.000165684	7.26177	up	chr3	+	193310932	193415600
AF191495	lincRNA-F11R	3.29e-06	3.9419	up	lincRNA	2187	chr1	-	160967605	161008711	downstream	NM_001033667	LY9	T-lymphocyte surface antigen Ly-9 isoform b	4.50358e-05	4.43946	down	chr1	+	160765927	160772483
AK300335	lincRNA-C6orf138-1	0.000703309	2.657	up	lincRNA	2328	chr6	-	47845987	48078943	downstream	NM_012120	CD2AP	CD2-associated protein	0.000489	2.081	up	chr6	+	47445524	47594996
uc010wse.1	KIAA1783	0.0454646	2.42149	down	UCSC_knowngene	9651	chr17	+	73584138	73622925	downstream	NM_001003716	RECQL5	ATP-dependent DNA helicase Q5 isoform 3	0.00161	2.80176	up	chr17	-	73644944	73663269
chr13:95301199-95328649-	lincRNA-GPR180	0.0075622	4.32292	down	lincRNA	27451	chr13	-	95301199	95328649	downstream	NM_005708	GPC6	glypican-6 precursor	3.4612e-05	14.1447	up	chr13	+	93879077	95060273
uc002ukz.1	LOC375295	9.96316e-07	3.79141	up	UCSC_knowngene	1156	chr2	-	177494567	177502659	downstream	NM_006554	MTX2	metaxin-2	0.000699	2.28597	up	chr2	+	177134122	177202753
ENST00000339037	AC017048.3	0.000863	2.87045	up	Ensembl	838	chr2	-	177494892	177502290	downstream	NM_006554	MTX2	metaxin-2	0.000699	2.28597	up	chr2	+	177134122	177202753
ENST00000504210	RP11-834C11.8	2.7211e-07	5.51886	down	Ensembl	403	chr12	+	54556922	54562379	upstream	NM_014212	HOXC11	homeobox protein Hox-C11	1.59e-06	8.92664	up	chr12	+	54366909	54370203
AK022887		0.0415217	2.50819	up	RNAdb	2629	chr12	+	54513394	54516023	upstream	NM_014212	HOXC11	homeobox protein Hox-C11	1.59e-06	8.92664	up	chr12	+	54366909	54370203
NR_026656	LOC400043	0.000133	4.48828	up	RefSeq_NR	1411	chr12	+	54519854	54526619	upstream	NM_014212	HOXC11	homeobox protein Hox-C11	1.59e-06	8.92664	up	chr12	+	54366909	54370203
NR_003138	SNHG10	0.000125468	2.60443	down	RefSeq_NR	1972	chr14	-	95999252	96001209	downstream	NM_024734	CLMN	calmin	0.00212976	4.43991	down	chr14	-	95648275	95786245
ENST00000503532	RP11-341G5.1	0.000425271	2.43047	down	Ensembl	582	chr4	+	13821733	13978699	upstream	NM_148894	BOD1L	biorientation of chromosomes in cell division	9.15e-05	3.84593	up	chr4	-	13570365	13629328
AW387651	lincRNA-TFE3	0.000940549	2.10775	down	lincRNA	232	chrX	-	48903267	49031062	overlap	NM_001029896	WDR45	WD repeat domain phosphoinositide-interacting	0.00142669	2.16893	up	chrX	-	48932091	48937564
chr15:74197716-74198633-	lincRNA-TBC1D21-1	0.0227653	2.14238	down	lincRNA	918	chr15	-	74197716	74198633	upstream	NM_033246	PML	protein PML isoform 7	0.00158	3.59202	up	chr15	+	74287013	74335717
BU690073	lincRNA-CCDC33	3.22796e-06	5.76369	down	lincRNA	416	chr15	+	74513616	74513896	upstream	NM_033246	PML	protein PML isoform 7	0.00158	3.59202	up	chr15	+	74287013	74335717
ENST00000512573	CTC-347C20.2	0.00212059	2.12914	down	Ensembl	594	chr5	-	71869946	71956496	downstream	NM_024754	PTCD2	pentatricopeptide repeat-containing protein 2	4.58913e-05	4.70295	up	chr5	+	71616199	71655180
BC036122	lincRNA-LRRC8D-2	8.16595e-06	2.46645	down	lincRNA	3001	chr1	+	90098630	90230061	downstream	NM_182975	ZNF326	zinc finger protein 326 isoform 3	0.00447	3.86147	up	chr1	+	90460677	90472000
AF191495	lincRNA-F11R	3.29e-06	3.9419	up	lincRNA	2187	chr1	-	160967605	161008711	upstream	NM_030916	PVRL4	poliovirus receptor-related protein 4 precursor	2.19e-05	2.11559	down	chr1	-	161040780	161059385
CN413083	lincRNA-UFC1	2.61e-05	4.7918	up	lincRNA	687	chr1	+	161106389	161107075	upstream	NM_030916	PVRL4	poliovirus receptor-related protein 4 precursor	2.19e-05	2.11559	down	chr1	-	161040780	161059385
BX096431	lincRNA-BBOX1-2	2.04145e-05	8.68883	down	lincRNA	738	chr11	-	27238707	27241649	upstream	NM_080654	CCDC34	coiled-coil domain-containing protein 34 isoform	0.00282	2.93636	up	chr11	-	27370418	27384795
NR_033314	BDNFOS	0.000181441	4.15189	down	RefSeq_NR	1478	chr11	+	27528398	27699348	upstream	NM_080654	CCDC34	coiled-coil domain-containing protein 34 isoform	0.00282	2.93636	up	chr11	-	27370418	27384795
BC036122	lincRNA-LRRC8D-2	8.16595e-06	2.46645	down	lincRNA	3001	chr1	+	90098630	90230061	downstream	NM_182976	ZNF326	zinc finger protein 326 isoform 1	0.000107	3.63608	up	chr1	+	90460677	90494094
NR_026862	PPP1R3E	8.23074e-05	2.08289	down	RefSeq_NR	4521	chr14	-	23765112	23772057	upstream	NM_004643	PABPN1	polyadenylate-binding protein 2	0.000103	3.89562	up	chr14	+	23789396	23795394
ENST00000450559	RP11-576N17.3	0.0017339	2.69792	down	Ensembl	1004	chr4	+	84168330	84169334	downstream	NM_032717	AGPAT9	glycerol-3-phosphate acyltransferase 3	6.09399e-05	2.61144	down	chr4	+	84457652	84527026
NR_024279	FLJ37453	7.84137e-05	3.0481	down	RefSeq_NR	2732	chr1	-	16160709	16174642	upstream	NM_178840	C1orf64	putative uncharacterized protein C1orf64	1.49969e-05	7.15376	down	chr1	+	16330730	16333184
uc001vks.2	BX647243	0.00182127	12.2372	down	UCSC_knowngene	6000	chr13	+	78493823	79158296	upstream	NM_003843	SCEL	sciellin isoform 2	0.000274022	5.25172	down	chr13	+	78109808	78219398
AK057381		4.3e-05	2.17512	up	misc_RNA	1873	chr14	+	23763060	23764935	downstream	NM_004643	PABPN1	polyadenylate-binding protein 2	0.000103	3.89562	up	chr14	+	23789396	23795394
AK097171		0.000263132	2.20936	up	misc_RNA	2511	chr6	-	160043563	160045633	upstream	NM_000636	SOD2	superoxide dismutase [Mn], mitochondrial isoform	0.0142	3.62345	up	chr6	-	160102754	160114353
BG210561	lincRNA-AGRP-2	0.00914839	2.70641	down	lincRNA	697	chr16	-	67551608	67552290	downstream	NM_001138	AGRP	agouti-related protein precursor	0.0177441	3.3058	down	chr16	-	67516473	67517716
CN315150	lincRNA-FAM65A-3	0.00798124	2.00774	down	lincRNA	705	chr16	+	67536554	67537247	upstream	NM_001138	AGRP	agouti-related protein precursor	0.0177441	3.3058	down	chr16	-	67516473	67517716
DA955413	lincRNA-FAM65A-1	0.00291443	9.96079	down	lincRNA	562	chr16	+	67552113	67552675	upstream	NM_001138	AGRP	agouti-related protein precursor	0.0177441	3.3058	down	chr16	-	67516473	67517716
ENST00000446884	RP1-30G7.2	3.74069e-05	2.75984	down	Ensembl	626	chrX	-	46185358	46187080	upstream	NM_001129899	ZNF673	protein ZNF673 isoform 3	0.000315	2.95257	up	chrX	+	46306623	46334074
uc004dgl.1	BC015977	0.00401787	6.64785	down	UCSC_knowngene	271	chrX	-	46185713	46187080	upstream	NM_001129899	ZNF673	protein ZNF673 isoform 3	0.000315	2.95257	up	chrX	+	46306623	46334074
AK096174		3.76437e-06	4.70447	up	misc_RNA	2220	chr12	+	122232715	122234935	downstream	NM_001178003	WDR66	WD repeat-containing protein 66 isoform 2	2.06854e-05	2.15935	down	chr12	+	122356462	122409974
uc001jef.2	LOC643650	4.46e-05	9.59179	up	UCSC_knowngene	2876	chr10	-	47096454	47151400	downstream	NM_181519	SYT15	synaptotagmin-15 isoform b	3.23593e-05	3.1	down	chr10	-	46955443	46970601
NR_026757	LOC729082	1.45e-05	2.29185	up	RefSeq_NR	1894	chr15	+	41576200	41591794	downstream	NM_016359	NUSAP1	nucleolar and spindle-associated protein 1	2.49e-05	13.7534	up	chr15	+	41624925	41673248
uc010wse.1	KIAA1783	0.0454646	2.42149	down	UCSC_knowngene	9651	chr17	+	73584138	73622925	upstream	NM_004524	LLGL2	lethal(2) giant larvae protein homolog 2 isoform	0.000919592	2.86662	down	chr17	+	73521782	73571290
AK021576		0.001	3.46748	up	NRED	2136	chr13	-	79890367	79924372	upstream	NM_019080	NDFIP2	NEDD4 family-interacting protein 2 isoform 1	3.00464e-05	2.57906	up	chr13	+	80055258	80130212
ENST00000498979	AP003395.1	0.000237547	3.66403	down	Ensembl	2471	chr11	+	119252534	119371306	upstream	NM_000190	HMBS	porphobilinogen deaminase isoform 1	0.00488	4.75433	up	chr11	+	118955586	118964259
uc001pwp.1	AK097820	9.2571e-05	5.53337	down	UCSC_knowngene	1784	chr11	+	119252519	119397374	upstream	NM_000190	HMBS	porphobilinogen deaminase isoform 1	0.00488	4.75433	up	chr11	+	118955586	118964259
AW974611	lincRNA-PARP11-4	0.00800727	5.668	down	lincRNA	620	chr12	+	3900214	3900821	upstream	NM_019854	PRMT8	protein arginine N-methyltransferase 8	0.00218121	2.44405	down	chr12	+	3600424	3703138
BX096603	lincRNA-CCND2-3	5.08998e-05	27.6454	down	lincRNA	733	chr12	+	3980899	4019676	upstream	NM_019854	PRMT8	protein arginine N-methyltransferase 8	0.00218121	2.44405	down	chr12	+	3600424	3703138
uc003wyp.1	CR613267	0.000435974	2.32128	down	UCSC_knowngene	2275	chr8	+	17942376	17955126	downstream	NM_000662	NAT1	arylamine N-acetyltransferase 1 isoform a	0.000485	2.42809	up	chr8	+	18067617	18081198
BG195666	lincRNA-NAT1-1	0.00957825	2.58603	down	lincRNA	580	chr8	+	17984343	17984911	downstream	NM_000662	NAT1	arylamine N-acetyltransferase 1 isoform a	0.000485	2.42809	up	chr8	+	18067617	18081198
ENST00000444862	AP005273.1	0.000428231	3.51908	down	Ensembl	522	chr11	+	64268324	64272858	upstream	NM_001170880	GPR137	integral membrane protein GPR137 isoform 2	5.52e-06	2.20622	up	chr11	+	64053581	64056972
ENST00000416785	RPSAP2	0.00198	2.13012	up	Ensembl	888	chr6	+	28699793	28700681	upstream	NM_182701	GPX6	glutathione peroxidase 6 precursor	0.00422148	2.63569	down	chr6	-	28471072	28483570
exon1607+	lincRNA-PPP2R5C-2	0.00506226	2.15416	down	lincRNA	191	chr14	+	102051986	102052176	downstream	NM_178586	PPP2R5C	serine/threonine-protein phosphatase 2A 56 kDa	4.43743e-05	2.19925	down	chr14	+	102276139	102394328
ENST00000309884	RP4-575N6.3	0.00986423	2.02669	down	Ensembl	492	chr1	-	101736430	101736924	downstream	NM_001400	S1PR1	sphingosine 1-phosphate receptor 1	0.00015977	3.4706	down	chr1	+	101702304	101707076
uc003klp.2	FIS	0.0229709	3.36627	down	UCSC_knowngene	2049	chr5	+	95187935	95195834	upstream	NM_199243	GPR150	probable G-protein coupled receptor 150	0.00721	2.43222	down	chr5	+	94955979	94957284
NR_026936	C5orf27	0.000200544	5.95672	down	RefSeq_NR	1931	chr5	+	95187935	95195834	upstream	NM_199243	GPR150	probable G-protein coupled receptor 150	0.00721	2.43222	down	chr5	+	94955979	94957284
ENST00000405234	RP1-278E11.5	0.00389964	2.30204	down	Ensembl	1099	chr6	+	39960553	39967972	upstream	NM_145027	KIF6	kinesin-like protein KIF6	9.67392e-07	19.8413	down	chr6	-	39302875	39693181
ENST00000511951	RP11-371F15.3	0.0184235	2.79762	down	Ensembl	282	chr4	-	139741110	139933800	upstream	NM_057175	NAA15	N-alpha-acetyltransferase 15, NatA auxiliary	0.00366	2.83224	up	chr4	+	140222675	140311935
ENST00000425294	RP3-471M13.1	0.000631	2.40564	up	Ensembl	312	chr1	-	172855086	172855398	downstream	NM_014283	C1orf9	protein osteopotentia homolog isoform 1	2.12e-05	11.8718	up	chr1	+	172502259	172580973
uc003laj.1	AK026965	3.67e-05	8.06368	up	UCSC_knowngene	2474	chr5	+	134368969	134680370	upstream	NM_152409	C5orf24	hypothetical protein LOC134553	0.00164	3.1546	up	chr5	+	134181369	134195425
exon90+	lincRNA-KNCN	0.00173903	2.53978	down	lincRNA	643	chr1	+	46985867	46986509	upstream	NM_003579	RAD54L	DNA repair and recombination protein RAD54-like	0.0106	8.21604	up	chr1	+	46713366	46744145
chr16:84296674-84307824+	lincRNA-WFDC1	0.0275671	2.28714	down	lincRNA	11151	chr16	+	84296674	84307824	upstream	NM_182980	OSGIN1	oxidative stress-induced growth inhibitor 1	0.000977619	2.31007	down	chr16	+	83982671	83999937
uc003xjb.2	BC034319	7.35e-05	6.39098	up	UCSC_knowngene	837	chr8	+	32785487	32902372	upstream	NM_001160002	NRG1	pro-neuregulin-1, membrane-bound isoform isoform	0.000491	3.95566	up	chr8	+	32405727	32586136
ENST00000450686	RP11-325F22.3	0.00417453	3.89344	down	Ensembl	538	chr7	-	104590761	104653491	upstream	NM_018682	MLL5	histone-lysine N-methyltransferase MLL5	0.000350661	2.05966	down	chr7	+	104654636	104754532
chr3:46129526-46140202+	lincRNA-CCR1	0.00664007	2.03702	down	lincRNA	10677	chr3	+	46129526	46140202	upstream	NM_006564	CXCR6	C-X-C chemokine receptor type 6	6.97e-05	2.01159	down	chr3	+	45984972	45989845
DA877320	lincRNA-SUPT3H-2	0.000413	3.11679	down	lincRNA	582	chr6	+	44698872	44797742	overlap	NM_003599	SUPT3H	transcription initiation protein SPT3 homolog	0.00287	2.38893	up	chr6	-	44797449	45345575
FN143838	lincRNA-MMP17	0.0102322	2.14264	down	lincRNA	91	chr12	+	132296541	132296622	downstream	NM_003565	ULK1	serine/threonine-protein kinase ULK1	0.0114253	2.19194	down	chr12	+	132379278	132407707
ENST00000419514	RP11-366O17.2	0.000132	29.8249	up	Ensembl	192	chr13	+	43385972	43386428	upstream	NM_182508	C13orf30	hypothetical protein LOC144809	9.78627e-06	73.8128	down	chr13	+	43355685	43365685
AK094723		1.71e-05	12.8509	up	misc_RNA	2466	chr17	+	39821817	39824283	downstream	NM_021991	JUP	junction plakoglobin	0.00967	2.13125	up	chr17	-	39910858	39942964
AK095243		4.81e-05	4.57527	up	misc_RNA	2460	chr17	-	39805306	39807765	upstream	NM_021991	JUP	junction plakoglobin	0.00967	2.13125	up	chr17	-	39910858	39942964
AW387651	lincRNA-TFE3	0.000940549	2.10775	down	lincRNA	232	chrX	-	48903267	49031062	upstream	NM_001472	GAGE2C	G antigen 2B/2C	5.17992e-05	3.36041	down	chrX	+	49216647	49294598
uc010wkl.1	DQ589083	0.000957	2.02708	up	UCSC_knowngene	1661	chr17	-	45126240	45127901	downstream	NM_006178	NSF	vesicle-fusing ATPase	0.000475438	4.93472	up	chr17	+	44668037	44834833
uc010wkn.1	DQ577523	0.00135	2.71306	up	UCSC_knowngene	2097	chr17	-	45129891	45131988	downstream	NM_006178	NSF	vesicle-fusing ATPase	0.000475438	4.93472	up	chr17	+	44668037	44834833
uc002ilc.1	CR602880	0.000291	3.14479	up	UCSC_knowngene	2080	chr17	-	45132466	45177627	downstream	NM_006178	NSF	vesicle-fusing ATPase	0.000475438	4.93472	up	chr17	+	44668037	44834833
BC065911		1.4609e-05	2.15633	up	NRED	2987	chr17	-	45125430	45128397	downstream	NM_006178	NSF	vesicle-fusing ATPase	0.000475438	4.93472	up	chr17	+	44668037	44834833
uc010wkm.1	CR624169	6.82172e-06	4.59741	up	UCSC_knowngene	416	chr17	-	45128651	45129168	downstream	NM_006178	NSF	vesicle-fusing ATPase	0.000475438	4.93472	up	chr17	+	44668037	44834833
CD516039	lincRNA-THBS4	0.000213478	2.90667	up	lincRNA	510	chr5	+	79306992	79307717	downstream	NM_003248	THBS4	thrombospondin-4 precursor	1.88e-05	3.85402	up	chr5	+	79331169	79379107
AW452601	lincRNA-MTX3	0.000345221	2.59611	down	lincRNA	524	chr5	-	79307192	79307717	upstream	NM_003248	THBS4	thrombospondin-4 precursor	1.88e-05	3.85402	up	chr5	+	79331169	79379107
AK095707		6.57508e-05	2.6202	down	misc_RNA	2984	chr16	+	81421429	81424413	upstream	NM_052892	PKD1L2	polycystic kidney disease protein 1-like 2	0.00421	2.02842	down	chr16	-	81134483	81253975
ENST00000432147	RP4-735C1.5	0.000436622	5.64087	up	Ensembl	355	chr1	-	110353265	110353620	downstream	NM_147148	GSTM4	glutathione S-transferase Mu 4 isoform 2	0.000704	2.56101	down	chr1	+	110198697	110208123
ENST00000447171	AC007255.8	8.73e-05	8.13758	down	Ensembl	889	chr7	-	29554384	29603279	upstream	NM_175887	PRR15	proline-rich protein 15	1.10297e-07	63.6192	down	chr7	+	29603426	29606911
ENST00000512573	CTC-347C20.2	0.00212059	2.12914	down	Ensembl	594	chr5	-	71869946	71956496	upstream	NM_138782	FCHO2	FCH domain only protein 2 isoform a	0.000747	6.90934	up	chr5	+	72251807	72386349
uc002vje.1	BC038542	0.00744	2.43	up	UCSC_knowngene	1008	chr2	-	219765535	219795358	downstream	NM_025216	WNT10A	protein Wnt-10a precursor	5.40159e-06	4.06582	down	chr2	+	219745254	219758651
ENST00000441225	RP11-739N20.1	4.67951e-05	3.63612	down	Ensembl	218	chr1	-	204336926	204346793	downstream	NM_198447	GOLT1A	vesicle transport protein GOT1A	9.75274e-05	50.9753	down	chr1	-	204167287	204183220
AK096174		3.76437e-06	4.70447	up	misc_RNA	2220	chr12	+	122232715	122234935	downstream	NM_144668	WDR66	WD repeat-containing protein 66 isoform 1	1.62e-07	72.8807	down	chr12	+	122356479	122441832
ENST00000425737	RP11-532L16.1	4.74e-05	8.92929	up	Ensembl	517	chr1	+	200298288	200298805	upstream	NM_003822	NR5A2	nuclear receptor subfamily 5 group A member 2	0.0223502	3.20571	down	chr1	+	199996769	200146550
chr1:200231279-200242758-	lincRNA-FAM58B-1	0.000777518	3.52805	up	lincRNA	11480	chr1	-	200231279	200242758	downstream	NM_003822	NR5A2	nuclear receptor subfamily 5 group A member 2	0.0223502	3.20571	down	chr1	+	199996769	200146550
HIT000395572		0.0112378	2.47295	down	H-invDB	354	chr1	-	200443206	200443559	downstream	NM_003822	NR5A2	nuclear receptor subfamily 5 group A member 2	0.0223502	3.20571	down	chr1	+	199996769	200146550
chr14:65072296-65092272+	lincRNA-PLEKHG3	0.00229194	2.17358	down	lincRNA	19977	chr14	+	65072296	65092272	downstream	NM_015549	PLEKHG3	pleckstrin homology domain-containing family G	0.0152	3.0087	down	chr14	+	65171192	65211060
AK128058	lincRNA-ZNF532	1.69355e-05	2.37725	up	lincRNA	6183	chr18	+	56529831	56653197	downstream	NM_001012512	GRP	gastrin-releasing peptide isoform 2	0.0134711	2.56201	up	chr18	+	56887399	56898002
ENST00000509603	AC104073.1	9.66842e-06	16.4129	down	Ensembl	2001	chr7	-	64600748	65235797	overlap	NM_152626	ZNF92	zinc finger protein 92 isoform 2	0.000874	2.2419	up	chr7	+	64838767	64865998
AA666059	lincRNA-ERC1	1.5e-05	5.13586	up	lincRNA	395	chr12	-	1650285	1650679	downstream	NM_178039	ERC1	ELKS/Rab6-interacting/CAST family member 1	0.000328	10.663	up	chr12	+	1100403	1605099
ENST00000512322	RP11-792D21.2	0.0051	7.30299	up	Ensembl	2095	chr4	+	79567370	79603853	upstream	NM_001166133	FRAS1	extracellular matrix protein FRAS1 isoform 2	1.22e-05	29.7624	up	chr4	+	78978723	79367787
uc003hlf.2	AK130099	0.000162	7.30029	up	UCSC_knowngene	2778	chr4	+	79567337	79604337	upstream	NM_001166133	FRAS1	extracellular matrix protein FRAS1 isoform 2	1.22e-05	29.7624	up	chr4	+	78978723	79367787
ENST00000435287	RP11-69I8.3	0.000226057	5.8161	down	Ensembl	495	chr6	+	132272085	132398533	upstream	NM_005021	ENPP3	ectonucleotide pyrophosphatase/phosphodiesterase	4.37943e-05	5.80438	down	chr6	+	131958441	132068550
AI902205	lincRNA-OXGR1-2	0.000519181	2.57481	down	lincRNA	448	chr13	-	97778688	97779138	upstream	NM_144778	MBNL2	muscleblind-like protein 2 isoform 1	0.000637	2.00408	up	chr13	+	97874573	98046374
AK021484	lincRNA-SYNPO2	1.12e-06	10.3392	up	lincRNA	3422	chr4	+	119672345	119956974	overlap	NM_133477	SYNPO2	synaptopodin-2 isoform a	2.04e-05	4.36148	up	chr4	+	119809995	119982402
AF052103		6.26334e-05	2.43173	down	NRED	1329	chr16	+	85399033	85400344	upstream	NM_014732	KIAA0513	hypothetical protein LOC9764	4.54775e-05	4.60065	down	chr16	+	85061409	85127828
uc003juq.2	BC028670	1.39e-05	6.42897	up	UCSC_knowngene	1649	chr5	-	65500951	65505274	downstream	NM_001077199	SREK1	splicing regulatory glutamine/lysine-rich	0.00216006	2.19547	up	chr5	+	65440084	65476714
BC017431		0.00237	2.3125	up	misc_RNA	2097	chr5	+	102183195	102185259	downstream	NM_138766	PAM	peptidyl-glycine alpha-amidating monooxygenase	5.99e-05	2.16749	up	chr5	+	102201526	102366808
ENST00000446698	AC007246.3	0.000256085	2.99674	down	Ensembl	593	chr2	+	39681062	39851496	downstream	NM_025264	THUMPD2	THUMP domain-containing protein 2	0.00125	3.48944	up	chr2	-	39963199	40006416
uc003hlf.2	AK130099	0.000162	7.30029	up	UCSC_knowngene	2778	chr4	+	79567337	79604337	upstream	NM_025074	FRAS1	extracellular matrix protein FRAS1 isoform 1	0.0282	2.3959	up	chr4	+	78978723	79465423
ENST00000512322	RP11-792D21.2	0.0051	7.30299	up	Ensembl	2095	chr4	+	79567370	79603853	upstream	NM_025074	FRAS1	extracellular matrix protein FRAS1 isoform 1	0.0282	2.3959	up	chr4	+	78978723	79465423
ENST00000496067	RP11-180K7.1	5.79566e-05	15.5556	down	Ensembl	2632	chr3	+	112521423	112541911	downstream	NM_014170	GTPBP8	GTP-binding protein 8 isoform 1	0.000961471	2.46746	up	chr3	+	112709799	112720221
AK124936	lincRNA-FAM47E	1.46772e-05	70.3504	down	lincRNA	1624	chr4	+	77135192	77204933	upstream	NM_002416	CXCL9	C-X-C motif chemokine 9 precursor	0.0092	2.46327	up	chr4	-	76922622	76928641
DN920247	lincRNA-SCARB2	0.000471954	5.41081	up	lincRNA	527	chr4	-	77102106	77155656	downstream	NM_002416	CXCL9	C-X-C motif chemokine 9 precursor	0.0092	2.46327	up	chr4	-	76922622	76928641
ENST00000507589	AC025370.2	0.0215327	2.41848	down	Ensembl	2742	chr8	+	104255772	104258560	downstream	NM_003506	FZD6	frizzled-6 isoform a precursor	0.0249	2.14253	up	chr8	+	104311058	104345094
ENST00000504402	RP11-367J11.3	1.13688e-05	9.58563	down	Ensembl	292	chr4	-	7096297	7105056	downstream	NM_153376	CCDC96	coiled-coil domain-containing protein 96	2.71015e-07	23.3747	down	chr4	-	7042575	7044728
AK131003		1.29e-05	20.6512	up	misc_RNA	689	chr5	+	134973225	134973914	upstream	NM_001040158	H2AFY	core histone macro-H2A.1 isoform 2	0.000297	2.03787	up	chr5	-	134670070	134734928
uc003laj.1	AK026965	3.67e-05	8.06368	up	UCSC_knowngene	2474	chr5	+	134368969	134680370	overlap	NM_001040158	H2AFY	core histone macro-H2A.1 isoform 2	0.000297	2.03787	up	chr5	-	134670070	134734928
EB386294	lincRNA-PLXDC2-1	0.0346143	3.92214	down	lincRNA	795	chr10	-	20678507	20679302	downstream	NM_032812	PLXDC2	plexin domain-containing protein 2 precursor	0.000104	2.78461	up	chr10	+	20105371	20569115
ENST00000419987	RP11-188P8.2	0.000199	41.744	up	Ensembl	799	chr10	+	20036751	20037550	downstream	NM_032812	PLXDC2	plexin domain-containing protein 2 precursor	0.000104	2.78461	up	chr10	+	20105371	20569115
ENST00000431157	RP11-354E11.2	7.04902e-05	24.2387	down	Ensembl	823	chr10	-	20010625	20017479	upstream	NM_032812	PLXDC2	plexin domain-containing protein 2 precursor	0.000104	2.78461	up	chr10	+	20105371	20569115
NR_026769	PPBPL2	0.0160913	4.51119	down	RefSeq_NR	1362	chr4	-	74919754	74921116	upstream	NM_001144978	MTHFD2L	probable bifunctional methylenetetrahydrofolate	2.85e-05	3.60572	up	chr4	+	75023828	75168814
AK056959	lincRNA-C4orf26	3.91291e-05	2.74437	down	lincRNA	1122	chr4	+	76439682	76472540	downstream	NM_178497	C4orf26	hypothetical protein LOC152816 isoform 2	0.013	2.4914	down	chr4	+	76481257	76491103
ENST00000415726	RP11-336K24.5	0.0269654	4.02359	down	Ensembl	401	chr1	+	155961180	155971578	downstream	NM_198406	PAQR6	progestin and adipoQ receptor family member 6	0.00052	2.37546	up	chr1	-	156213208	156217792
ENST00000439492	AP000350.6	0.00576	2.21717	up	Ensembl	1763	chr22	+	24269086	24271761	upstream	NM_182520	C22orf15	hypothetical protein LOC150248	7.44198e-07	239.983	down	chr22	+	24105207	24108050
AK126983		0.000257491	2.41018	down	misc_RNA	5637	chr22	-	24243618	24249255	downstream	NM_182520	C22orf15	hypothetical protein LOC150248	7.44198e-07	239.983	down	chr22	+	24105207	24108050
ENST00000432147	RP4-735C1.5	0.000436622	5.64087	up	Ensembl	355	chr1	-	110353265	110353620	downstream	NM_146421	GSTM1	glutathione S-transferase Mu 1 isoform 2	0.000179223	2.35175	down	chr1	+	110230417	110236367
NR_015367	LOC550643	7.87915e-05	2.71132	down	RefSeq_NR	722	chrX	+	56755717	56844002	downstream	NM_001010862	SPIN3	spindlin-3	7.18e-05	3.14196	up	chrX	-	57017263	57021988
ENST00000374922	RP11-622K12.1	9.80069e-05	3.0407	down	Ensembl	1529	chrX	+	56755691	56844813	downstream	NM_001010862	SPIN3	spindlin-3	7.18e-05	3.14196	up	chrX	-	57017263	57021988
EU831898	lincRNA-RPL29	6.03791e-05	5.75385	down	lincRNA	3142	chr3	-	51965892	52258329	downstream	NM_015106	RAD54L2	helicase ARIP4	0.0245338	2.02503	up	chr3	+	51575595	51697612
DC428746	lincRNA-ARHGAP15	3.83e-05	2.31657	down	lincRNA	577	chr2	+	143828536	143986326	overlap	NM_018460	ARHGAP15	rho GTPase-activating protein 15	0.00046	2.67698	down	chr2	+	143886898	144525921
AF289584	lincRNA-NKD1	0.00770905	3.40259	down	lincRNA	2142	chr16	+	50369047	50668127	downstream	NM_001042355	CYLD	ubiquitin carboxyl-terminal hydrolase CYLD	0.00038	3.6839	up	chr16	+	50775960	50835846
ENST00000426952	RP5-817C23.1	0.0265	2.45538	up	Ensembl	862	chr1	-	68125836	68126698	upstream	NM_018841	GNG12	guanine nucleotide-binding protein	2.1435e-05	5.18712	up	chr1	-	68167148	68299155
BC034819		0.000597	2.34421	up	NRED	2882	chr4	+	153457444	153460292	downstream	NM_001025595	ARFIP1	arfaptin-1 isoform 1	0.00132	8.82813	up	chr4	+	153701111	153833063
ENST00000503268	CTC-340D7.1	0.000370543	2.96032	down	Ensembl	499	chr5	-	68128411	68257985	upstream	NM_022909	CENPH	centromere protein H	1.16e-06	4.96139	up	chr5	+	68485374	68506184
BQ184470	lincRNA-EDEM3	0.000436242	2.63201	down	lincRNA	542	chr1	+	184633040	184633560	upstream	NM_030806	C1orf21	chromosome 1 open reading frame 21	0.000109446	3.55472	down	chr1	+	184356149	184598155
NR_033314	BDNFOS	0.000181441	4.15189	down	RefSeq_NR	1478	chr11	+	27528398	27699348	upstream	NM_030771	CCDC34	coiled-coil domain-containing protein 34 isoform	0.00202526	2.73215	up	chr11	-	27360060	27384795
BX096431	lincRNA-BBOX1-2	2.04145e-05	8.68883	down	lincRNA	738	chr11	-	27238707	27241649	upstream	NM_030771	CCDC34	coiled-coil domain-containing protein 34 isoform	0.00202526	2.73215	up	chr11	-	27360060	27384795
AK291502	lincRNA-HIST2H2BF	0.000477	8.23087	up	lincRNA	1686	chr1	+	149369293	149763584	downstream	NM_001005464	HIST2H3A	histone H3.2	0.000672	6.08045	up	chr1	+	149824180	149824687
chr1:149731347-149744257-	lincRNA-PPIAL4B-1	0.000942	5.09017	down	lincRNA	12911	chr1	-	149731347	149744257	upstream	NM_001005464	HIST2H3A	histone H3.2	0.000672	6.08045	up	chr1	+	149824180	149824687
ENST00000414621	AC006027.2	0.00642841	2.11137	down	Ensembl	230	chr7	+	30430523	30451991	upstream	NM_152793	C7orf41	hypothetical protein LOC222166	8.76e-06	2.83169	down	chr7	+	30174551	30202381
ENST00000447171	AC007255.8	8.73e-05	8.13758	down	Ensembl	889	chr7	-	29554384	29603279	downstream	NM_001039936	CHN2	beta-chimaerin isoform 1	0.00220951	3.20605	down	chr7	+	29519485	29553944
AF191495	lincRNA-F11R	3.29e-06	3.9419	up	lincRNA	2187	chr1	-	160967605	161008711	downstream	NM_021181	SLAMF7	SLAM family member 7	3.01071e-05	6.09374	down	chr1	+	160709076	160724601
AA587541	lincRNA-MEF2A	0.00290954	2.4875	down	lincRNA	441	chr15	+	99976938	99977379	downstream	NM_001130926	MEF2A	myocyte-specific enhancer factor 2A isoform 2	0.000197924	2.61888	up	chr15	+	100106132	100256629
AK097171		0.000263132	2.20936	up	misc_RNA	2511	chr6	-	160043563	160045633	upstream	NM_173516	PNLDC1	poly(A)-specific ribonuclease PARN-like	0.000157319	3.25976	down	chr6	+	160221300	160241735
AK021484	lincRNA-SYNPO2	1.12e-06	10.3392	up	lincRNA	3422	chr4	+	119672345	119956974	overlap	NM_001128934	SYNPO2	synaptopodin-2 isoform c	0.000179	6.55541	up	chr4	+	119809995	119959669
ENST00000508720	RP11-584P21.4	0.000116523	2.89868	up	Ensembl	297	chr4	+	68312001	68312298	downstream	NM_012108	STAP1	signal-transducing adaptor protein 1	1.73e-06	10.2598	down	chr4	+	68424445	68472616
DA631333	lincRNA-B4GALT5-2	0.0185912	3.45953	down	lincRNA	571	chr20	+	48232411	48237700	upstream	NM_004975	KCNB1	potassium voltage-gated channel subfamily B	0.000548895	9.41631	down	chr20	-	47988504	48099181
ENST00000454185	RP11-568A7.3	0.000179924	31.3018	down	Ensembl	579	chr6	-	167650995	167653968	downstream	NM_004367	CCR6	C-C chemokine receptor type 6	0.00138	2.34451	down	chr6	+	167525294	167552629
uc003juq.2	BC028670	1.39e-05	6.42897	up	UCSC_knowngene	1649	chr5	-	65500951	65505274	downstream	NM_139168	SREK1	splicing regulatory glutamine/lysine-rich	0.000196	3.60563	up	chr5	+	65440662	65476714
ENST00000411949	AC006460.2	0.0154	3.07145	up	Ensembl	717	chr2	-	191541760	191573442	upstream	NM_139266	STAT1	signal transducer and activator of transcription	0.000109209	2.51068	up	chr2	-	191840262	191878976
BM909110	lincRNA-KLHDC4	0.00421514	2.01027	down	lincRNA	1172	chr16	-	87813676	87840082	upstream	NM_001173543	BANP	protein BANP isoform g	0.000288101	3.39104	down	chr16	+	88003623	88110924
BX647686	lincRNA-CCR6	1.20243e-05	33.595	down	lincRNA	5327	chr6	+	167412892	167552626	upstream	NM_001006932	RPS6KA2	ribosomal protein S6 kinase alpha-2 isoform b	0.00224168	3.27226	down	chr6	-	166822853	167275771
BI029614	lincRNA-ERF	0.00147314	2.80695	down	lincRNA	493	chr19	-	42777698	42778182	upstream	NM_002573	PAFAH1B3	platelet-activating factor acetylhydrolase IB	4.6e-05	2.46555	up	chr19	-	42801184	42806796
ENST00000438679	RP5-1065P14.1	0.00153992	2.12562	up	Ensembl	415	chr1	+	229177917	229178332	downstream	NM_006542	SPHAR	protein SPHAR	1.13367e-05	2.52856	down	chr1	+	229440128	229441250
ENST00000424151	AC006378.3	3.86e-05	2.6098	down	Ensembl	314	chr7	-	93594721	93597702	downstream	NM_006528	TFPI2	tissue factor pathway inhibitor 2 precursor	0.000725066	2.03324	down	chr7	-	93515744	93520065
BX647686	lincRNA-CCR6	1.20243e-05	33.595	down	lincRNA	5327	chr6	+	167412892	167552626	overlap	NM_031409	CCR6	C-C chemokine receptor type 6	2.34e-05	9.84353	down	chr6	+	167536240	167552629
ENST00000439207	RP11-568A7.2	0.000779	2.31334	down	Ensembl	205	chr6	+	167655378	167659404	upstream	NM_031409	CCR6	C-C chemokine receptor type 6	2.34e-05	9.84353	down	chr6	+	167536240	167552629
ENST00000454185	RP11-568A7.3	0.000179924	31.3018	down	Ensembl	579	chr6	-	167650995	167653968	downstream	NM_031409	CCR6	C-C chemokine receptor type 6	2.34e-05	9.84353	down	chr6	+	167536240	167552629
BC036853	lincRNA-PDCD1LG2-2	5.37e-05	2.69876	up	lincRNA	1660	chr9	-	5357968	5630071	overlap	NM_025239	PDCD1LG2	programmed cell death 1 ligand 2 precursor	2.85e-06	4.74483	up	chr9	+	5510544	5571282
BC002831		0.00119973	11.1746	up	misc_RNA	1013	chr20	+	57209827	57210789	upstream	NM_020673	RAB22A	ras-related protein Rab-22A	0.000646	2.08071	up	chr20	+	56884770	56942563
chr5:171991045-172004045-	lincRNA-SH3PXD2B	0.00849717	2.65455	down	lincRNA	13001	chr5	-	171991045	172004045	downstream	NM_152277	UBTD2	ubiquitin domain-containing protein 2	0.00191432	2.19392	up	chr5	-	171636649	171710795
ENST00000506596	ANKDD1B	0.000163418	25.4049	down	Ensembl	1815	chr5	+	74907300	74967671	upstream	NM_001130996	HMGCR	3-hydroxy-3-methylglutaryl-Coenzyme A reductase	0.00899	2.61934	up	chr5	+	74632992	74657926
uc001nng.1	AX746988	0.00381868	4.19478	down	UCSC_knowngene	2603	chr11	-	58701115	58825925	upstream	NM_198947	FAM111B	hypothetical protein LOC374393 isoform a	0.000573	11.3194	up	chr11	+	58874657	58894888
EU831898	lincRNA-RPL29	6.03791e-05	5.75385	down	lincRNA	3142	chr3	-	51965892	52258329	overlap	NM_004704	RRP9	U3 small nucleolar RNA-interacting protein 2	0.00148	3.51436	up	chr3	-	51967445	51975922
uc003fbc.2	AK311218	1.40833e-06	10.3773	down	UCSC_knowngene	2015	chr3	-	156799456	156840791	downstream	NM_001004316	LEKR1	leucine-, glutamate- and lysine-rich protein 1	0.000651881	3.40145	down	chr3	+	156544095	156763918
AK128058	lincRNA-ZNF532	1.69355e-05	2.37725	up	lincRNA	6183	chr18	+	56529831	56653197	downstream	NM_033280	SEC11C	signal peptidase complex catalytic subunit	2.7546e-05	2.42889	down	chr18	+	56807124	56826063
chr10:112147868-112175330+	lincRNA-DUSP5-3	0.0103	2.83103	down	lincRNA	27463	chr10	+	112147868	112175330	downstream	NM_005445	SMC3	structural maintenance of chromosomes protein 3	0.00013	3.07429	up	chr10	+	112327448	112364392
chr5:41879793-41892193-	lincRNA-OXCT1	0.0023009	2.09098	down	lincRNA	12401	chr5	-	41879793	41892193	upstream	NM_175921	C5orf51	hypothetical protein LOC285636	9.03e-05	5.54801	up	chr5	+	41904469	41921738
AV731505	lincRNA-PDE7A	0.00322675	4.41801	down	lincRNA	403	chr8	-	66865963	66866366	upstream	NM_033105	DNAJC5B	dnaJ homolog subfamily C member 5B	0.000503783	4.54407	down	chr8	+	66933790	67012755
DN991958	lincRNA-DNAJC5B	1.07873e-05	3.84057	down	lincRNA	662	chr8	+	66891455	66992718	overlap	NM_033105	DNAJC5B	dnaJ homolog subfamily C member 5B	0.000503783	4.54407	down	chr8	+	66933790	67012755
BC029586	lincRNA-UBE2V2-2	1.14982e-07	84.7919	down	lincRNA	1671	chr8	-	49623350	49647793	upstream	NM_003068	SNAI2	zinc finger protein SNAI2	0.013	3.48972	up	chr8	-	49830238	49833999
ENST00000439207	RP11-568A7.2	0.000779	2.31334	down	Ensembl	205	chr6	+	167655378	167659404	upstream	NM_004367	CCR6	C-C chemokine receptor type 6	0.00138	2.34451	down	chr6	+	167525294	167552629
BX647686	lincRNA-CCR6	1.20243e-05	33.595	down	lincRNA	5327	chr6	+	167412892	167552626	overlap	NM_004367	CCR6	C-C chemokine receptor type 6	0.00138	2.34451	down	chr6	+	167525294	167552629
ENST00000417795	AC034220.3	0.01561	2.05057	down	Ensembl	1792	chr5	-	131646977	131705608	upstream	NM_002198	IRF1	interferon regulatory factor 1	0.000494	3.03	up	chr5	-	131817300	131826465
BM680929	lincRNA-PLA2G12B	0.000597718	4.18109	up	lincRNA	520	chr10	-	74761774	74762435	downstream	NM_138357	CCDC109A	coiled-coil domain-containing protein 109A	4.55e-05	3.75806	up	chr10	+	74451888	74647452
ENST00000508433	RP11-89B16.2	7.48e-05	4.81926	up	Ensembl	640	chr4	-	54793665	54794305	upstream	NM_012110	CHIC2	cysteine-rich hydrophobic domain 2 protein	0.000168	2.29366	up	chr4	-	54875957	54930815
uc004aiu.1	AK095210	0.0014432	2.57736	down	UCSC_knowngene	2078	chr9	+	74920351	74958126	downstream	NM_001102421	ZFAND5	AN1-type zinc finger protein 5	0.000122	3.40871	up	chr9	-	74966340	74980163
AK125261	lincRNA-CDHR3	4.06237e-05	195.012	down	lincRNA	2199	chr7	+	105517266	105672911	overlap	NM_152750	CDHR3	cadherin-related family member 3 precursor	9.44e-06	26.1926	down	chr7	+	105603656	105676877
BU663229	lincRNA-POU3F1-1	0.000780214	4.14332	down	lincRNA	555	chr1	-	39183439	39183984	upstream	NM_024595	AKIRIN1	akirin-1 isoform 1	0.0002	2.44068	up	chr1	+	39456915	39471737
uc010dko.2	LOC339290	8.69e-05	2.46239	up	UCSC_knowngene	5487	chr18	+	5238098	5246503	downstream	NM_012307	EPB41L3	band 4.1-like protein 3	0.0386	2.51409	up	chr18	-	5392387	5543986
ENST00000420836	AC005294.1	1.48e-05	9.59296	up	Ensembl	1083	chr12	+	68429546	68430635	downstream	NM_000619	IFNG	interferon gamma precursor	7.57e-05	2.02144	up	chr12	-	68548549	68553521
uc001stv.1	AK124066	0.000204804	5.0991	down	UCSC_knowngene	1791	chr12	+	68383224	68415107	downstream	NM_000619	IFNG	interferon gamma precursor	7.57e-05	2.02144	up	chr12	-	68548549	68553521
BC017416		7.37665e-05	13.3933	up	misc_RNA	1439	chr12	-	68820110	68821517	downstream	NM_000619	IFNG	interferon gamma precursor	7.57e-05	2.02144	up	chr12	-	68548549	68553521
NR_026757	LOC729082	1.45e-05	2.29185	up	RefSeq_NR	1894	chr15	+	41576200	41591794	downstream	NM_002344	LTK	leukocyte tyrosine kinase receptor isoform 1	0.0193	2.218	up	chr15	-	41795839	41806085
chr4:25089927-25101952+	lincRNA-SEPSECS-1	1.75e-05	4.78454	down	lincRNA	12026	chr4	+	25089927	25101952	downstream	NM_024936	ZCCHC4	zinc finger CCHC domain-containing protein 4	0.00535	2.22058	up	chr4	+	25314395	25372005
ENST00000457217	RP11-222A5.1	0.00176466	2.33242	down	Ensembl	1809	chr1	+	175846478	175849604	downstream	NM_001001740	RFWD2	E3 ubiquitin-protein ligase RFWD2 isoform d24	0.000104	7.81019	up	chr1	-	175913966	176176370
ENST00000505987	HSP90AA4P	1.51e-05	2.76857	up	Ensembl	2173	chr4	+	88812994	88815167	downstream	NM_001040060	SPP1	osteopontin isoform c precursor	2.24e-05	29.6093	up	chr4	+	88896801	88904563
AA234012	lincRNA-AIFM1	9.34422e-06	5.82011	down	lincRNA	486	chrX	+	129251231	129318597	overlap	NM_004794	RAB33A	ras-related protein Rab-33A	1.48347e-05	7.04685	down	chrX	+	129305772	129318844
BQ302800	lincRNA-PRSS38	0.00741	5.78172	up	lincRNA	740	chr1	-	227890324	228285713	upstream	NM_052843	OBSCN	obscurin isoform a	6.63356e-07	5.43044	down	chr1	+	228395860	228548951
AK055989		1.09634e-06	82.1556	down	misc_RNA	2012	chr15	-	82108948	82110962	upstream	NM_032246	MEX3B	RNA-binding protein MEX3B	1.64e-05	2.82077	up	chr15	-	82334127	82338361
chr14:25152560-25164885-	lincRNA-GZMB	0.00837859	2.27514	down	lincRNA	12326	chr14	-	25152560	25164885	downstream	NM_025081	NYNRIN	protein NYNRIN	0.0254051	3.07816	down	chr14	+	24867991	24888494
chr20:541348-562112-	lincRNA-CSNK2A1	0.00578805	3.74181	down	lincRNA	20765	chr20	-	541348	562112	downstream	NM_024958	NRSN2	neurensin-2	0.000445	3.97849	up	chr20	+	327369	335512
NR_026757	LOC729082	1.45e-05	2.29185	up	RefSeq_NR	1894	chr15	+	41576200	41591794	downstream	NM_206961	LTK	leukocyte tyrosine kinase receptor isoform 2	0.000475037	2.21763	down	chr15	-	41795839	41806085
chr4:71997061-72013886+	lincRNA-SLC4A4	1.98476e-05	2.42182	down	lincRNA	16826	chr4	+	71997061	72013886	upstream	NM_000788	DCK	deoxycytidine kinase	2.4e-06	5.1238	up	chr4	+	71859264	71896629
ENST00000500076	AC010198.2	0.000116033	3.05941	down	Ensembl	1551	chr12	+	30908007	30933672	downstream	NM_004399	DDX11	probable ATP-dependent RNA helicase DDX11	0.04	2.78054	up	chr12	+	31226778	31257725
ENST00000500076	AC010198.2	0.000116033	3.05941	down	Ensembl	1551	chr12	+	30908007	30933672	downstream	NM_001080509	TSPAN11	tetraspanin-11	5.96848e-05	2.86001	down	chr12	+	31079837	31149537
uc003xjb.2	BC034319	7.35e-05	6.39098	up	UCSC_knowngene	837	chr8	+	32785487	32902372	upstream	NM_013962	NRG1	pro-neuregulin-1, membrane-bound isoform isoform	0.00119	2.35496	up	chr8	+	31497267	32600770
BC043232	lincRNA-ZSCAN5A	0.00016719	3.06092	down	lincRNA	2472	chr19	-	56732680	56879752	upstream	NM_144690	ZNF582	zinc finger protein 582	0.00215817	2.75799	down	chr19	-	56894647	56904889
DN918054	lincRNA-PDE4B	0.0323	2.05443	down	lincRNA	400	chr1	-	66890612	67423817	overlap	NM_001146111	MIER1	mesoderm induction early response protein 1	0.000131	2.04808	up	chr1	+	67390577	67454302
DN918055	lincRNA-SGIP1	0.00129	2.27115	up	lincRNA	399	chr1	+	66890612	67423817	overlap	NM_001146111	MIER1	mesoderm induction early response protein 1	0.000131	2.04808	up	chr1	+	67390577	67454302
uc002msx.1	AX747405	0.000106636	5.71562	down	UCSC_knowngene	1801	chr19	+	12098431	12138553	upstream	NM_021915	ZNF69	zinc finger protein 69	3.78e-06	5.45916	down	chr19	+	11998669	12025365
ENST00000394346	RP11-512H23.2	4.90851e-05	2.86684	up	Ensembl	511	chrX	-	130929684	130930195	upstream	NM_016542	MST4	serine/threonine-protein kinase MST4 isoform 1	0.000192143	3.83405	up	chrX	+	131157244	131209971

## Sheet: M3 vs T2
# Condition pairs: M3 vs T2 # Fold Change cut-off: 2.0 This table contains the differentially expressed lincRNA and nearby coding gene pairs (distance < 300 kb). # Column A: seqname, the sequence identifier. # Column B: GeneSymbol, the symbol of the LncRNA. # Column C: Fold change - LncRNAs, the ratio of normalized intensities between two samples, positive value indicates up-regulation, and negat…
seqname	GeneSymbol	Fold change - LncRNAs	Log Fold change - LncRNAs	Absolute Fold change - LncRNAs	Regulation - LncRNAs	source	RNAlength	Chrom	Strand	txStart	txEnd	GenomeRelationship	NearbyGene	NearbyGeneSymbol	NearbyProteinName	Fold change - mRNAs	Log Fold change - mRNAs	Absolute Fold change - mRNAs	Regulation - mRNAs	NearbyGeneChrom	NearbyGeneStrand	NearbyGenetxStart	NearbyGenetxEnd
uc003tdd.2	RP9P	-2.05245	-1.03734	2.05245	down	UCSC_knowngene	1403	chr7	-	32956427	32982782	upstream	NM_007270	FKBP9	peptidyl-prolyl cis-trans isomerase FKBP9	2.66266	1.41287	2.66266	up	chr7	+	32997004	33046543
NR_003500	RP9P	-3.01491	-1.59212	3.01491	down	RefSeq_NR	1405	chr7	-	32956427	32982782	upstream	NM_007270	FKBP9	peptidyl-prolyl cis-trans isomerase FKBP9	2.66266	1.41287	2.66266	up	chr7	+	32997004	33046543
BG926920	lincRNA-CSNK1A1	-2.70906	-1.43779	2.70906	down	lincRNA	665	chr5	+	148836893	148837488	downstream	NM_001172698	PPARGC1B	peroxisome proliferator-activated receptor gamma	-2.32856	-1.21944	2.32856	down	chr5	+	149109814	149234585
chr5:148834826-148846630-	lincRNA-IL17B	-2.84543	-1.50865	2.84543	down	lincRNA	11805	chr5	-	148834826	148846630	upstream	NM_001172698	PPARGC1B	peroxisome proliferator-activated receptor gamma	-2.32856	-1.21944	2.32856	down	chr5	+	149109814	149234585
ENST00000505987	HSP90AA4P	2.83996	1.50587	2.83996	up	Ensembl	2173	chr4	+	88812994	88815167	downstream	NM_001040058	SPP1	osteopontin isoform a precursor	12.0804	3.5946	12.0804	up	chr4	+	88896801	88904563
ENST00000511512	RP11-71E19.1	-3.4917	-1.80393	3.4917	down	Ensembl	501	chr3	+	125985638	126010122	downstream	NM_182628	CCDC37	coiled-coil domain-containing protein 37	-6.72308	-2.74912	6.72308	down	chr3	+	126113781	126155398
AI902205	lincRNA-OXGR1-2	-2.3905	-1.25731	2.3905	down	lincRNA	448	chr13	-	97778688	97779138	downstream	NM_080818	OXGR1	2-oxoglutarate receptor 1	-2.95638	-1.56383	2.95638	down	chr13	-	97637972	97646604
DB340468	lincRNA-KLF13-2	-13.7542	-3.7818	13.7542	down	lincRNA	578	chr15	+	31598146	31598723	downstream	NM_015995	KLF13	Krueppel-like factor 13	-2.07161	-1.05076	2.07161	down	chr15	+	31619082	31670102
ENST00000242475	ARL4P	2.56175	1.35713	2.56175	up	Ensembl	1125	chr10	+	62444040	62445165	downstream	NM_001786	CDK1	cyclin-dependent kinase 1 isoform 1	8.11391	3.0204	8.11391	up	chr10	+	62538211	62554610
chr8:82280811-82287539+	lincRNA-PMP2	-4.5325	-2.18031	4.5325	down	lincRNA	6729	chr8	+	82280811	82287539	downstream	NM_001144879	IMPA1	inositol monophosphatase 1 isoform 3	14.1559	3.82333	14.1559	up	chr8	-	82569150	82598589
BC043564	lincRNA-KCNA2-1	-35.6463	-5.15568	35.6463	down	lincRNA	2022	chr1	-	111136202	111174096	downstream	NM_022768	RBM15	putative RNA-binding protein 15 isoform 1	2.48313	1.31216	2.48313	up	chr1	+	110881944	110889303
ENST00000442197	AL132709.9	2.2077	1.14254	2.2077	up	Ensembl	625	chr14	+	101427363	101433377	upstream	NM_001134888	RTL1	retrotransposon-like protein 1	-2.43959	-1.28664	2.43959	down	chr14	-	101346991	101351184
ENST00000414488	AL132709.5	4.09434	2.03363	4.09434	up	Ensembl	800	chr14	+	101415314	101424887	upstream	NM_001134888	RTL1	retrotransposon-like protein 1	-2.43959	-1.28664	2.43959	down	chr14	-	101346991	101351184
BC036602		-2.75635	-1.46276	2.75635	down	RNAdb	1336	chr14	+	101319252	101320560	downstream	NM_001134888	RTL1	retrotransposon-like protein 1	-2.43959	-1.28664	2.43959	down	chr14	-	101346991	101351184
NR_024149	MEG8	-5.5031	-2.46024	5.5031	down	RefSeq_NR	501	chr14	+	101361106	101373305	upstream	NM_001134888	RTL1	retrotransposon-like protein 1	-2.43959	-1.28664	2.43959	down	chr14	-	101346991	101351184
NR_002766	MEG3	4.31717	2.11009	4.31717	up	RefSeq_NR	1595	chr14	+	101292444	101327358	downstream	NM_001134888	RTL1	retrotransposon-like protein 1	-2.43959	-1.28664	2.43959	down	chr14	-	101346991	101351184
AF422192		2.61487	1.38674	2.61487	up	misc_RNA	1422	chr14	+	101359264	101360646	upstream	NM_001134888	RTL1	retrotransposon-like protein 1	-2.43959	-1.28664	2.43959	down	chr14	-	101346991	101351184
uc001yjz.1	AK094562	-3.16747	-1.66333	3.16747	down	UCSC_knowngene	2638	chr14	+	101536247	101539271	upstream	NM_001134888	RTL1	retrotransposon-like protein 1	-2.43959	-1.28664	2.43959	down	chr14	-	101346991	101351184
NR_033358	MEG3	2.76502	1.46729	2.76502	up	RefSeq_NR	1735	chr14	+	101292444	101327358	downstream	NM_001134888	RTL1	retrotransposon-like protein 1	-2.43959	-1.28664	2.43959	down	chr14	-	101346991	101351184
uc004aiu.1	AK095210	-2.88112	-1.52663	2.88112	down	UCSC_knowngene	2078	chr9	+	74920351	74958126	upstream	NM_004293	GDA	guanine deaminase isoform b	-6.74624	-2.75408	6.74624	down	chr9	+	74764292	74867140
CA439425	lincRNA-C9orf85	5.19334	2.37666	5.19334	up	lincRNA	668	chr9	-	74598216	74598868	upstream	NM_004293	GDA	guanine deaminase isoform b	-6.74624	-2.75408	6.74624	down	chr9	+	74764292	74867140
AA234012	lincRNA-AIFM1	-5.55909	-2.47485	5.55909	down	lincRNA	486	chrX	+	129251231	129318597	downstream	NM_178471	GPR119	glucose-dependent insulinotropic receptor	-4.1906	-2.06716	4.1906	down	chrX	-	129518318	129519511
uc003wpf.1	AK128400	-2.03164	-1.02265	2.03164	down	UCSC_knowngene	3993	chr8	-	590407	594400	downstream	NM_012173	FBXO25	F-box only protein 25 isoform 3	2.39826	1.26199	2.39826	up	chr8	+	356807	419875
AL832093		-2.36628	-1.24262	2.36628	down	RNAdb	3338	chr16	-	85176297	85179607	downstream	NM_001145548	ZDHHC7	palmitoyltransferase ZDHHC7 isoform 1	2.11448	1.0803	2.11448	up	chr16	-	85008066	85045141
ENST00000411804	RP1-91G5.3	-2.17384	-1.12024	2.17384	down	Ensembl	707	chr1	+	152346429	152417932	downstream	NM_019060	CRCT1	cysteine-rich C-terminal protein 1	-936.001	-9.87037	936.001	down	chr1	+	152486977	152488481
ENST00000420707	RP1-14N1.2	-2.0138	-1.00992	2.0138	down	Ensembl	906	chr1	+	152161826	152313586	downstream	NM_019060	CRCT1	cysteine-rich C-terminal protein 1	-936.001	-9.87037	936.001	down	chr1	+	152486977	152488481
BI059095	lincRNA-UBASH3B-1	2.0413	1.02949	2.0413	up	lincRNA	330	chr11	+	122276676	122276991	downstream	NM_032873	UBASH3B	ubiquitin-associated and SH3 domain-containing	2.37996	1.25094	2.37996	up	chr11	+	122526397	122685187
CR599308	lincRNA-AEBP2-2	7.32707	2.87324	7.32707	up	lincRNA	2138	chr12	+	19556999	19672288	overlap	NM_001114176	AEBP2	zinc finger protein AEBP2 isoform b	5.10585	2.35215	5.10585	up	chr12	+	19592607	19675173
AK310900	lincRNA-SYT9	-6.03893	-2.59429	6.03893	down	lincRNA	4074	chr11	+	7041699	7159136	overlap	NM_176822	NLRP14	NACHT, LRR and PYD domains-containing protein	-2.90635	-1.53921	2.90635	down	chr11	+	7041699	7092757
AA863287	lincRNA-OR2AG2	-3.59825	-1.8473	3.59825	down	lincRNA	519	chr11	+	6754957	6767657	downstream	NM_176822	NLRP14	NACHT, LRR and PYD domains-containing protein	-2.90635	-1.53921	2.90635	down	chr11	+	7041699	7092757
uc003plc.3	SNHG5	-2.11345	-1.0796	2.11345	down	UCSC_knowngene	1078	chr6	-	86386725	86388440	downstream	NM_001159675	SYNCRIP	heterogeneous nuclear ribonucleoprotein Q	4.41381	2.14203	4.41381	up	chr6	-	86323692	86351169
AK289744	lincRNA-SUN2	-3.80601	-1.92828	3.80601	down	lincRNA	2725	chr22	-	39131913	39190148	upstream	NM_014508	APOBEC3C	probable DNA dC->dU-editing enzyme APOBEC-3C	3.28589	1.71629	3.28589	up	chr22	+	39410264	39414825
AL137390	lincRNA-NKAIN3	36.9922	5.20915	36.9922	up	lincRNA	1202	chr8	+	62791440	62798121	upstream	NM_001164752	ASPH	aspartyl/asparaginyl beta-hydroxylase isoform h	3.43539	1.78047	3.43539	up	chr8	-	62536268	62602408
EU831898	lincRNA-RPL29	-5.59124	-2.48317	5.59124	down	lincRNA	3142	chr3	-	51965892	52258329	upstream	NM_025222	WDR82	WD repeat-containing protein 82	-2.06797	-1.04821	2.06797	down	chr3	-	52288437	52312659
ENST00000418851	AC008280.1	-2.22853	-1.1561	2.22853	down	Ensembl	412	chr2	-	54256688	54257819	downstream	NM_001164165	GPR75-ASB3	GPR75-ASB3 protein	4.63179	2.21157	4.63179	up	chr2	-	53897449	54087170
NR_024279	FLJ37453	-3.13715	-1.64946	3.13715	down	RefSeq_NR	2732	chr1	-	16160709	16174642	upstream	NM_001042704	CLCNKA	chloride channel protein ClC-Ka isoform 2	-5.09778	-2.34987	5.09778	down	chr1	+	16348485	16360545
DB311472	lincRNA-C14orf147-2	38.6725	5.27324	38.6725	up	lincRNA	511	chr14	+	34456685	34457202	upstream	NM_001164749	NPAS3	neuronal PAS domain-containing protein 3 isoform	10.014	3.32395	10.014	up	chr14	+	33408458	34273382
BG679513	lincRNA-KCNT2-2	2.00837	1.00603	2.00837	up	lincRNA	868	chr1	+	193254821	193255677	upstream	NM_001042369	TROVE2	60 kDa SS-A/Ro ribonucleoprotein isoform 1	5.35682	2.42138	5.35682	up	chr1	+	193029003	193060906
ENST00000444862	AP005273.1	-2.93067	-1.55123	2.93067	down	Ensembl	522	chr11	+	64268324	64272858	upstream	NM_001177358	GPR137	integral membrane protein GPR137 isoform 5	2.37019	1.245	2.37019	up	chr11	+	64052282	64056972
BX110651	lincRNA-EGLN3-2	-3.73554	-1.90132	3.73554	down	lincRNA	724	chr14	-	34528165	34528892	downstream	NM_001164749	NPAS3	neuronal PAS domain-containing protein 3 isoform	10.014	3.32395	10.014	up	chr14	+	33408458	34273382
chr16:84296674-84307824+	lincRNA-WFDC1	-2.65977	-1.4113	2.65977	down	lincRNA	11151	chr16	+	84296674	84307824	upstream	NM_178452	LRRC50	leucine-rich repeat-containing protein 50	-3.33198	-1.73638	3.33198	down	chr16	+	84178864	84211524
ENST00000411804	RP1-91G5.3	-2.17384	-1.12024	2.17384	down	Ensembl	707	chr1	+	152346429	152417932	downstream	NM_178433	LCE3B	late cornified envelope protein 3B	-3.77219	-1.9154	3.77219	down	chr1	+	152586286	152586574
ENST00000420707	RP1-14N1.2	-2.0138	-1.00992	2.0138	down	Ensembl	906	chr1	+	152161826	152313586	downstream	NM_178433	LCE3B	late cornified envelope protein 3B	-3.77219	-1.9154	3.77219	down	chr1	+	152586286	152586574
ENST00000438350	RP11-40H20.3	3.04761	1.60768	3.04761	up	Ensembl	221	chr1	+	27537754	27537975	downstream	NM_015023	WDTC1	WD and tetratricopeptide repeats protein 1	-2.62877	-1.39439	2.62877	down	chr1	+	27561006	27635110
CN413083	lincRNA-UFC1	4.63202	2.21164	4.63202	up	lincRNA	687	chr1	+	161106389	161107075	downstream	NM_001102566	PCP4L1	Purkinje cell protein 4-like protein 1	-17.1602	-4.10099	17.1602	down	chr1	+	161228516	161255240
AF191495	lincRNA-F11R	4.10745	2.03824	4.10745	up	lincRNA	2187	chr1	-	160967605	161008711	upstream	NM_001102566	PCP4L1	Purkinje cell protein 4-like protein 1	-17.1602	-4.10099	17.1602	down	chr1	+	161228516	161255240
DB027866	lincRNA-SDPR-2	-5.75822	-2.52562	5.75822	down	lincRNA	595	chr2	+	192557927	192573896	upstream	NM_012223	MYO1B	myosin-Ib isoform 2	3.38318	1.75838	3.38318	up	chr2	+	192110106	192290115
BX952962	lincRNA-OBFC2A-2	10.8236	3.43611	10.8236	up	lincRNA	428	chr2	-	192564056	192564732	downstream	NM_012223	MYO1B	myosin-Ib isoform 2	3.38318	1.75838	3.38318	up	chr2	+	192110106	192290115
BF108976	lincRNA-MYO1B-4	-2.51868	-1.33267	2.51868	down	lincRNA	509	chr2	+	192068946	192069452	downstream	NM_012223	MYO1B	myosin-Ib isoform 2	3.38318	1.75838	3.38318	up	chr2	+	192110106	192290115
uc004exm.2	BC007360	4.50715	2.17221	4.50715	up	UCSC_knowngene	646	chrX	-	133678458	133680653	downstream	NM_000194	HPRT1	hypoxanthine-guanine phosphoribosyltransferase	3.12191	1.64243	3.12191	up	chrX	+	133594174	133634698
ENST00000440570	AC004383.4	4.43611	2.14929	4.43611	up	Ensembl	760	chrX	-	133677366	133680662	downstream	NM_000194	HPRT1	hypoxanthine-guanine phosphoribosyltransferase	3.12191	1.64243	3.12191	up	chrX	+	133594174	133634698
ENST00000423943	RP11-48O20.4	-8.26514	-3.04704	8.26514	down	Ensembl	1113	chr1	+	159931013	159948851	upstream	NM_020789	IGSF9	protein turtle homolog A isoform b	-2.04933	-1.03515	2.04933	down	chr1	-	159896828	159915386
ENST00000396848	AC010138.3	5.59039	2.48295	5.59039	up	Ensembl	867	chr2	-	204637353	204638225	downstream	NM_006139	CD28	T-cell-specific surface glycoprotein CD28	-2.14587	-1.10156	2.14587	down	chr2	+	204571197	204602557
ENST00000415349	AC125238.4	-2.09262	-1.06531	2.09262	down	Ensembl	1299	chr2	-	204629017	204630316	downstream	NM_006139	CD28	T-cell-specific surface glycoprotein CD28	-2.14587	-1.10156	2.14587	down	chr2	+	204571197	204602557
ENST00000438679	RP5-1065P14.1	2.63635	1.39854	2.63635	up	Ensembl	415	chr1	+	229177917	229178332	downstream	NM_004578	RAB4A	ras-related protein Rab-4A	-2.55975	-1.35601	2.55975	down	chr1	+	229406878	229440518
chr4:114709776-114720551+	lincRNA-ARSJ-1	-2.2001	-1.13757	2.2001	down	lincRNA	10776	chr4	+	114709776	114720551	downstream	NM_024590	ARSJ	arylsulfatase J precursor	2.93676	1.55423	2.93676	up	chr4	-	114821439	114900878
chr4:114709776-114720551-	lincRNA-CAMK2D	-2.52314	-1.33522	2.52314	down	lincRNA	10776	chr4	-	114709776	114720551	upstream	NM_024590	ARSJ	arylsulfatase J precursor	2.93676	1.55423	2.93676	up	chr4	-	114821439	114900878
DW444236	lincRNA-ZNF703-2	-2.29079	-1.19584	2.29079	down	lincRNA	227	chr8	+	37001355	37001513	upstream	NM_001031836	KCNU1	potassium channel subfamily U member 1	-2.983	-1.57676	2.983	down	chr8	+	36641841	36793643
AI379096	lincRNA-KCNU1-1	3.04692	1.60735	3.04692	up	lincRNA	488	chr8	-	37006433	37025053	downstream	NM_001031836	KCNU1	potassium channel subfamily U member 1	-2.983	-1.57676	2.983	down	chr8	+	36641841	36793643
AB051448		4.03378	2.01213	4.03378	up	NRED	6475	chr22	-	45373647	45476304	downstream	NM_181334	PRR5-ARHGAP8	PRR5-ARHGAP8 fusion protein	2.38175	1.25202	2.38175	up	chr22	+	45098381	45258664
uc002msx.1	AX747405	-6.3389	-2.66423	6.3389	down	UCSC_knowngene	1801	chr19	+	12098431	12138553	upstream	NM_152357	ZNF440	zinc finger protein 440	-2.97262	-1.57173	2.97262	down	chr19	+	11925106	11946016
BG401674	lincRNA-AKAP8	-3.24052	-1.69623	3.24052	down	lincRNA	945	chr19	+	15424346	15425051	downstream	NM_022904	RASAL3	RAS protein activator like-3	-8.36918	-3.06509	8.36918	down	chr19	-	15562437	15575382
exon99+	lincRNA-CDCP2	2.03917	1.02798	2.03917	up	lincRNA	715	chr1	+	54587441	54588155	upstream	NM_001010978	LDLRAD1	low-density lipoprotein receptor class A	-331.37	-8.3723	331.37	down	chr1	-	54474505	54483803
exon98+	lincRNA-CDCP2	2.71446	1.44067	2.71446	up	lincRNA	176	chr1	+	54583893	54584068	upstream	NM_001010978	LDLRAD1	low-density lipoprotein receptor class A	-331.37	-8.3723	331.37	down	chr1	-	54474505	54483803
NR_033182	LOC100130872-SPON2	-2.34889	-1.23198	2.34889	down	RefSeq_NR	729	chr4	-	1165639	1202634	upstream	NM_005882	MAEA	macrophage erythroblast attacher isoform 2	3.12438	1.64357	3.12438	up	chr4	+	1283671	1333925
BC043160		5.24108	2.38986	5.24108	up	misc_RNA	2454	chr5	-	10195298	10197734	upstream	NM_199133	FAM173B	hypothetical protein LOC134145	2.45176	1.29382	2.45176	up	chr5	-	10226437	10250014
exon1609+	lincRNA-PPP2R5C-2	-2.86566	-1.51887	2.86566	down	lincRNA	198	chr14	+	102055149	102055346	upstream	NM_001362	DIO3	type III iodothyronine deiodinase	-2.05605	-1.03987	2.05605	down	chr14	+	102027687	102029789
exon1607+	lincRNA-PPP2R5C-2	-2.54169	-1.34579	2.54169	down	lincRNA	191	chr14	+	102051986	102052176	upstream	NM_001362	DIO3	type III iodothyronine deiodinase	-2.05605	-1.03987	2.05605	down	chr14	+	102027687	102029789
BG210561	lincRNA-AGRP-2	-3.12553	-1.6441	3.12553	down	lincRNA	697	chr16	-	67551608	67552290	downstream	NM_001129731	PLEKHG4	puratrophin-1 isoform 2	-3.2174	-1.6859	3.2174	down	chr16	+	67313491	67323403
CN315150	lincRNA-FAM65A-3	-2.83035	-1.50098	2.83035	down	lincRNA	705	chr16	+	67536554	67537247	upstream	NM_001129731	PLEKHG4	puratrophin-1 isoform 2	-3.2174	-1.6859	3.2174	down	chr16	+	67313491	67323403
DA955413	lincRNA-FAM65A-1	-17.2583	-4.10922	17.2583	down	lincRNA	562	chr16	+	67552113	67552675	upstream	NM_001129731	PLEKHG4	puratrophin-1 isoform 2	-3.2174	-1.6859	3.2174	down	chr16	+	67313491	67323403
AX747038	lincRNA-BANK1-2	-58.5261	-5.87101	58.5261	down	lincRNA	3544	chr4	+	102341117	102995967	overlap	NM_001127507	BANK1	B-cell scaffold protein with ankyrin repeats	-2.59727	-1.377	2.59727	down	chr4	+	102711763	102995969
NR_026751	NCRNA00171	4.24582	2.08604	4.24582	up	RefSeq_NR	2445	chr6	-	29968788	30028961	upstream	NM_052828	TRIM10	tripartite motif-containing protein 10 isoform	-2.753	-1.46101	2.753	down	chr6	-	30119722	30128711
uc003che.2	BC040563	-5.39832	-2.43251	5.39832	down	UCSC_knowngene	3263	chr3	-	37847343	37903250	upstream	NM_007337	DLEC1	deleted in lung and esophageal cancer protein 1	-58.7908	-5.87752	58.7908	down	chr3	+	38080695	38164228
ENST00000438772	AC036222.1	2.11264	1.07905	2.11264	up	Ensembl	595	chr17	-	46710868	46724152	downstream	NM_001075099	SKAP1	src kinase-associated phosphoprotein 1 isoform	-8.13735	-3.02456	8.13735	down	chr17	-	46210801	46507594
AK000839		27.5153	4.78216	27.5153	up	misc_RNA	1951	chr17	-	46657698	46659621	downstream	NM_001075099	SKAP1	src kinase-associated phosphoprotein 1 isoform	-8.13735	-3.02456	8.13735	down	chr17	-	46210801	46507594
AX747492	lincRNA-HFE2	2.0936	1.06599	2.0936	up	lincRNA	4510	chr1	+	145209144	146424095	overlap	NM_001101663	NBPF24	hypothetical protein LOC728912	2.8802	1.52617	2.8802	up	chr1	-	146034018	146068245
ENST00000439110	PTMAP6	2.64796	1.40488	2.64796	up	Ensembl	327	chr20	-	55275892	55276570	downstream	NM_001164115	CASS4	cas scaffolding protein family member 4 isoform	-2.13154	-1.09189	2.13154	down	chr20	+	54987313	55034396
ENST00000424719	RP5-884C9.3	2.81108	1.49112	2.81108	up	Ensembl	338	chr1	-	38546247	38546585	downstream	NM_001113482	MANEAL	glycoprotein endo-alpha-1,2-mannosidase-like	2.67212	1.41798	2.67212	up	chr1	+	38259773	38267278
chr13:71907099-71940949-	lincRNA-KLHL1-2	-5.15112	-2.36489	5.15112	down	lincRNA	33851	chr13	-	71907099	71940949	upstream	NM_080759	DACH1	dachshund homolog 1 isoform a	-7.13744	-2.83541	7.13744	down	chr13	-	72012097	72441330
BM782281	lincRNA-DLGAP1-2	-7.66348	-2.938	7.66348	down	lincRNA	472	chr18	+	3466247	3478973	upstream	NM_170695	TGIF1	homeobox protein TGIF1 isoform a	-2.05263	-1.03747	2.05263	down	chr18	+	3451590	3458406
AK126983		-2.44671	-1.29084	2.44671	down	misc_RNA	5637	chr22	-	24243618	24249255	downstream	NM_005940	MMP11	stromelysin-3 preproprotein	22.4607	4.48933	22.4607	up	chr22	+	24115035	24126503
ENST00000439492	AP000350.6	2.67961	1.42202	2.67961	up	Ensembl	1763	chr22	+	24269086	24271761	upstream	NM_005940	MMP11	stromelysin-3 preproprotein	22.4607	4.48933	22.4607	up	chr22	+	24115035	24126503
AW993564	lincRNA-MAPK1IP1L-1	-4.48672	-2.16566	4.48672	down	lincRNA	503	chr14	-	55509240	55739892	overlap	NM_002306	LGALS3	galectin-3 isoform 1	-2.44463	-1.28961	2.44463	down	chr14	+	55595934	55612148
ENST00000512349	CTD-2313F11.2	-2.05774	-1.04106	2.05774	down	Ensembl	591	chr5	+	54350255	54350968	downstream	NM_001008397	GPX8	probable glutathione peroxidase 8	7.44183	2.89566	7.44183	up	chr5	+	54455983	54463129
chr8:37531517-37542367+	lincRNA-ZNF703-1	-5.09302	-2.34852	5.09302	down	lincRNA	10851	chr8	+	37531517	37542367	downstream	NM_007198	PROSC	proline synthase co-transcribed bacterial	2.18633	1.12851	2.18633	up	chr8	+	37620100	37637286
ENST00000427188	C21orf84	2.88149	1.52682	2.88149	up	Ensembl	967	chr21	-	44890312	44891472	downstream	NM_173354	SIK1	serine/threonine-protein kinase SIK1	-3.48986	-1.80317	3.48986	down	chr21	-	44834397	44847002
ENST00000442815	AP001046.5	-16.0107	-4.00097	16.0107	down	Ensembl	2798	chr21	-	44778026	44782229	upstream	NM_173354	SIK1	serine/threonine-protein kinase SIK1	-3.48986	-1.80317	3.48986	down	chr21	-	44834397	44847002
uc004aiu.1	AK095210	-2.88112	-1.52663	2.88112	down	UCSC_knowngene	2078	chr9	+	74920351	74958126	downstream	NM_001102420	ZFAND5	AN1-type zinc finger protein 5	2.77924	1.47469	2.77924	up	chr9	-	74966340	74980163
AV718641	lincRNA-PMCH	-2.29684	-1.19965	2.29684	down	lincRNA	636	chr12	-	102604245	102604880	downstream	NM_018370	DRAM1	DNA damage-regulated autophagy modulator protein	2.57278	1.36333	2.57278	up	chr12	+	102271104	102317401
chr10:44001669-44017744-	lincRNA-HNRNPF	-2.55255	-1.35194	2.55255	down	lincRNA	16076	chr10	-	44001669	44017744	downstream	NM_145313	RASGEF1A	ras-GEF domain-containing family member 1A	-2.53141	-1.33994	2.53141	down	chr10	-	43689983	43762367
AW572416	lincRNA-WNT4	-3.33145	-1.73615	3.33145	down	lincRNA	350	chr1	-	22585663	22585982	downstream	NM_044472	CDC42	cell division control protein 42 homolog isoform	-2.53408	-1.34146	2.53408	down	chr1	+	22379119	22417296
ENST00000455966	RP1-224A6.3	-2.31358	-1.21012	2.31358	down	Ensembl	615	chr1	-	22350486	22351461	upstream	NM_044472	CDC42	cell division control protein 42 homolog isoform	-2.53408	-1.34146	2.53408	down	chr1	+	22379119	22417296
uc001wxl.2	BC084561	-3.54052	-1.82396	3.54052	down	UCSC_knowngene	2301	chr14	-	50504312	50507947	downstream	NM_001012706	C14orf182	hypothetical protein LOC283551	-10.2963	-3.36406	10.2963	down	chr14	-	50448429	50474238
BM956062	lincRNA-PGS1	5.70521	2.51228	5.70521	up	lincRNA	174	chr17	+	76360558	76360732	upstream	NM_018996	TNRC6C	trinucleotide repeat-containing gene 6C protein	-2.55512	-1.35339	2.55512	down	chr17	+	76000317	76104916
CR737987	lincRNA-LRIG1	-3.73111	-1.8996	3.73111	down	lincRNA	445	chr3	-	66831091	67022804	upstream	NM_032505	KBTBD8	kelch repeat and BTB domain-containing protein	3.30431	1.72435	3.30431	up	chr3	+	67048726	67061632
BJ997865	lincRNA-SUCLG2-1	-2.80754	-1.48931	2.80754	down	lincRNA	540	chr3	+	67321285	67321825	upstream	NM_032505	KBTBD8	kelch repeat and BTB domain-containing protein	3.30431	1.72435	3.30431	up	chr3	+	67048726	67061632
AK307235	lincRNA-SRD5A2	-2.14411	-1.10038	2.14411	down	lincRNA	876	chr2	-	31750961	31935339	downstream	NM_014600	EHD3	EH domain-containing protein 3	-6.82257	-2.77032	6.82257	down	chr2	+	31456879	31491260
AK057381		2.0872	1.06157	2.0872	up	misc_RNA	1873	chr14	+	23763060	23764935	downstream	NM_001037288	CMTM5	CKLF-like MARVEL transmembrane domain-containing	-2.12078	-1.08459	2.12078	down	chr14	+	23846016	23848981
ENST00000504210	RP11-834C11.8	-5.58926	-2.48266	5.58926	down	Ensembl	403	chr12	+	54556922	54562379	upstream	NM_018953	HOXC5	homeobox protein Hox-C5	-2.36254	-1.24034	2.36254	down	chr12	+	54426831	54429144
NR_026656	LOC400043	3.9435	1.97948	3.9435	up	RefSeq_NR	1411	chr12	+	54519854	54526619	upstream	NM_018953	HOXC5	homeobox protein Hox-C5	-2.36254	-1.24034	2.36254	down	chr12	+	54426831	54429144
AK022887		4.22161	2.07779	4.22161	up	RNAdb	2629	chr12	+	54513394	54516023	upstream	NM_018953	HOXC5	homeobox protein Hox-C5	-2.36254	-1.24034	2.36254	down	chr12	+	54426831	54429144
NR_026655	FLJ12825	-2.3437	-1.22879	2.3437	down	RefSeq_NR	3942	chr12	+	54452037	54516018	upstream	NM_018953	HOXC5	homeobox protein Hox-C5	-2.36254	-1.24034	2.36254	down	chr12	+	54426831	54429144
ENST00000513381	RP11-834C11.5	2.79687	1.48382	2.79687	up	Ensembl	499	chr12	-	54478915	54519614	downstream	NM_018953	HOXC5	homeobox protein Hox-C5	-2.36254	-1.24034	2.36254	down	chr12	+	54426831	54429144
AK097798	lincRNA-ZNF676	5.45844	2.44849	5.45844	up	lincRNA	2091	chr19	-	22361892	23158666	overlap	NM_001001411	ZNF676	zinc finger protein 676	5.3225	2.4121	5.3225	up	chr19	-	22361902	22379753
NR_027441	FLJ36777	-2.09088	-1.06411	2.09088	down	RefSeq_NR	2140	chr4	-	7099150	7105103	downstream	NM_152293	TADA2B	transcriptional adapter 2-beta	-2.68589	-1.4254	2.68589	down	chr4	+	7045155	7059677
ENST00000504402	RP11-367J11.3	-9.47525	-3.24416	9.47525	down	Ensembl	292	chr4	-	7096297	7105056	downstream	NM_152293	TADA2B	transcriptional adapter 2-beta	-2.68589	-1.4254	2.68589	down	chr4	+	7045155	7059677
uc002huv.2	CR597260	-7.20255	-2.84851	7.20255	down	UCSC_knowngene	1013	chr17	+	38673277	38683253	downstream	NM_003079	SMARCE1	SWI/SNF-related matrix-associated	3.06042	1.61373	3.06042	up	chr17	-	38783975	38804103
ENST00000440194	RP11-328M4.2	6.7146	2.7473	6.7146	up	Ensembl	196	chr6	-	41462590	41513981	downstream	NM_018643	TREM1	triggering receptor expressed on myeloid cells 1	28.8115	4.84857	28.8115	up	chr6	-	41243711	41254457
NR_026938	LOC221442	-3.19809	-1.67721	3.19809	down	RefSeq_NR	4585	chr6	+	41068772	41108567	downstream	NM_018643	TREM1	triggering receptor expressed on myeloid cells 1	28.8115	4.84857	28.8115	up	chr6	-	41243711	41254457
ENST00000466206	RP11-657O9.1	-2.34836	-1.23166	2.34836	down	Ensembl	562	chr3	-	135074908	135158671	downstream	NM_004441	EPHB1	ephrin type-B receptor 1 precursor	3.13289	1.6475	3.13289	up	chr3	+	134514098	134979307
CN289466	lincRNA-MEIS1-1	-2.28777	-1.19394	2.28777	down	lincRNA	784	chr2	-	67618829	67619611	upstream	NM_019002	ETAA1	ewing's tumor-associated antigen 1	2.76357	1.46653	2.76357	up	chr2	+	67624441	67637533
AL832122		-2.09198	-1.06487	2.09198	down	misc_RNA	5572	chr1	-	23607802	23613245	upstream	NM_003196	TCEA3	transcription elongation factor A protein 3	-6.08408	-2.60504	6.08408	down	chr1	-	23707554	23751261
BC036853	lincRNA-PDCD1LG2-2	2.56542	1.3592	2.56542	up	lincRNA	1660	chr9	-	5357968	5630071	upstream	NM_024896	ERMP1	endoplasmic reticulum metallopeptidase 1	5.06966	2.34189	5.06966	up	chr9	-	5784571	5833081
ENST00000504210	RP11-834C11.8	-5.58926	-2.48266	5.58926	down	Ensembl	403	chr12	+	54556922	54562379	upstream	NM_017410	HOXC13	homeobox protein Hox-C13	-302.797	-8.24221	302.797	down	chr12	+	54332575	54340328
ENST00000513381	RP11-834C11.5	2.79687	1.48382	2.79687	up	Ensembl	499	chr12	-	54478915	54519614	downstream	NM_017410	HOXC13	homeobox protein Hox-C13	-302.797	-8.24221	302.797	down	chr12	+	54332575	54340328
NR_026656	LOC400043	3.9435	1.97948	3.9435	up	RefSeq_NR	1411	chr12	+	54519854	54526619	upstream	NM_017410	HOXC13	homeobox protein Hox-C13	-302.797	-8.24221	302.797	down	chr12	+	54332575	54340328
AK022887		4.22161	2.07779	4.22161	up	RNAdb	2629	chr12	+	54513394	54516023	upstream	NM_017410	HOXC13	homeobox protein Hox-C13	-302.797	-8.24221	302.797	down	chr12	+	54332575	54340328
NR_026655	FLJ12825	-2.3437	-1.22879	2.3437	down	RefSeq_NR	3942	chr12	+	54452037	54516018	upstream	NM_017410	HOXC13	homeobox protein Hox-C13	-302.797	-8.24221	302.797	down	chr12	+	54332575	54340328
ENST00000423943	RP11-48O20.4	-8.26514	-3.04704	8.26514	down	Ensembl	1113	chr1	+	159931013	159948851	upstream	NM_001134233	C1orf204	hypothetical protein LOC284677	-2.86495	-1.51851	2.86495	down	chr1	-	159804263	159825137
chr18:47271277-47283077-	lincRNA-LIPG-2	-6.26148	-2.6465	6.26148	down	lincRNA	11801	chr18	-	47271277	47283077	downstream	NM_017653	DYM	dymeclin	2.14904	1.10369	2.14904	up	chr18	-	46570171	46987079
chr18:46516702-46521932-	lincRNA-SMAD7-2	-2.8563	-1.51415	2.8563	down	lincRNA	5231	chr18	-	46516702	46521932	upstream	NM_017653	DYM	dymeclin	2.14904	1.10369	2.14904	up	chr18	-	46570171	46987079
AX747492	lincRNA-HFE2	2.0936	1.06599	2.0936	up	lincRNA	4510	chr1	+	145209144	146424095	upstream	NM_004892	SEC22B	vesicle-trafficking protein SEC22b	2.16695	1.11566	2.16695	up	chr1	+	145096406	145116922
BE244504	lincRNA-FAM110A	5.09107	2.34797	5.09107	up	lincRNA	447	chr20	-	837118	837565	upstream	NM_006814	PSMF1	proteasome inhibitor PI31 subunit	2.67824	1.42129	2.67824	up	chr20	+	1099239	1148426
CR615581	lincRNA-ANGPT4	-2.14493	-1.10093	2.14493	down	lincRNA	1325	chr20	+	825766	838103	downstream	NM_006814	PSMF1	proteasome inhibitor PI31 subunit	2.67824	1.42129	2.67824	up	chr20	+	1099239	1148426
ENST00000453828	RP11-520A21.1	-13.8664	-3.79352	13.8664	down	Ensembl	670	chr3	-	41012031	41013069	upstream	NM_001098209	CTNNB1	catenin beta-1	20.2789	4.34191	20.2789	up	chr3	+	41240941	41281939
ENST00000444862	AP005273.1	-2.93067	-1.55123	2.93067	down	Ensembl	522	chr11	+	64268324	64272858	upstream	NM_001039496	C11orf20	hypothetical protein LOC25858	-5.50038	-2.45953	5.50038	down	chr11	+	64067862	64072239
uc001wxl.2	BC084561	-3.54052	-1.82396	3.54052	down	UCSC_knowngene	2301	chr14	-	50504312	50507947	upstream	NM_001003805	ATP5S	ATP synthase subunit s, mitochondrial isoform b	3.22063	1.68734	3.22063	up	chr14	+	50779046	50792946
EB386665	lincRNA-SLN	6.35931	2.66887	6.35931	up	lincRNA	821	chr11	-	107644071	107644892	upstream	NM_017516	RAB39	ras-related protein Rab-39A	5.79971	2.53598	5.79971	up	chr11	+	107799276	107834208
AW572416	lincRNA-WNT4	-3.33145	-1.73615	3.33145	down	lincRNA	350	chr1	-	22585663	22585982	downstream	NM_005747	CELA3A	chymotrypsin-like elastase family member 3A	2.71381	1.44032	2.71381	up	chr1	+	22328148	22339035
ENST00000455966	RP1-224A6.3	-2.31358	-1.21012	2.31358	down	Ensembl	615	chr1	-	22350486	22351461	downstream	NM_005747	CELA3A	chymotrypsin-like elastase family member 3A	2.71381	1.44032	2.71381	up	chr1	+	22328148	22339035
ENST00000415726	RP11-336K24.5	-7.80017	-2.9635	7.80017	down	Ensembl	401	chr1	+	155961180	155971578	upstream	NM_004723	ARHGEF2	rho guanine nucleotide exchange factor 2 isoform	3.36517	1.75068	3.36517	up	chr1	-	155916629	155947966
AF086310		2.34716	1.23092	2.34716	up	misc_RNA	578	chr4	-	76007137	76007705	downstream	NM_001729	BTC	probetacellulin precursor	2.16858	1.11675	2.16858	up	chr4	-	75671447	75719882
ENST00000487840	RP11-167H9.4	-2.0789	-1.05582	2.0789	down	Ensembl	372	chr3	+	149757000	149931401	upstream	NM_007282	RNF13	E3 ubiquitin-protein ligase RNF13	-3.44491	-1.78447	3.44491	down	chr3	+	149530474	149679925
uc002uwa.2	AOX2	3.12505	1.64388	3.12505	up	UCSC_knowngene	978	chr2	+	201635394	201658962	downstream	NM_021824	NIF3L1	NIF3-like protein 1 isoform 2	3.29586	1.72066	3.29586	up	chr2	+	201754107	201768655
ENST00000439492	AP000350.6	2.67961	1.42202	2.67961	up	Ensembl	1763	chr22	+	24269086	24271761	upstream	NM_001007468	SMARCB1	SWI/SNF-related matrix-associated	2.80152	1.48621	2.80152	up	chr22	+	24129149	24176705
AK126983		-2.44671	-1.29084	2.44671	down	misc_RNA	5637	chr22	-	24243618	24249255	downstream	NM_001007468	SMARCB1	SWI/SNF-related matrix-associated	2.80152	1.48621	2.80152	up	chr22	+	24129149	24176705
chr1:82115673-82123396-	lincRNA-ELTD1-1	-4.02237	-2.00805	4.02237	down	lincRNA	7724	chr1	-	82115673	82123396	upstream	NM_012302	LPHN2	latrophilin-2 precursor	2.06681	1.04741	2.06681	up	chr1	+	82266081	82458107
BC017431		2.03173	1.02271	2.03173	up	misc_RNA	2097	chr5	+	102183195	102185259	downstream	NM_015216	PPIP5K2	inositol hexakisphosphate and	6.93054	2.79297	6.93054	up	chr5	+	102465256	102538909
AW205788	lincRNA-ATP2A2	-3.47533	-1.79715	3.47533	down	lincRNA	347	chr12	+	110658505	110685736	upstream	NM_014055	IFT81	intraflagellar transport protein 81 homolog	-2.03673	-1.02626	2.03673	down	chr12	+	110562139	110656600
AW387651	lincRNA-TFE3	-2.2146	-1.14705	2.2146	down	lincRNA	232	chrX	-	48903267	49031062	upstream	NM_001127200	GAGE2E	G antigen 2E	-5.85654	-2.55005	5.85654	down	chrX	+	49207159	49214420
CU444927	lincRNA-MYEOV-2	2.34387	1.22889	2.34387	up	lincRNA	742	chr11	-	69059868	69182303	overlap	NM_138768	MYEOV	hypothetical protein LOC26579	-26.435	-4.72438	26.435	down	chr11	+	69061621	69064754
ENST00000432147	RP4-735C1.5	6.9127	2.78925	6.9127	up	Ensembl	355	chr1	-	110353265	110353620	downstream	NM_024526	EPS8L3	epidermal growth factor receptor kinase	-2.56273	-1.35768	2.56273	down	chr1	-	110292701	110306644
uc002ike.2	LOC644246	-2.96721	-1.56911	2.96721	down	UCSC_knowngene	513	chr17	+	44270938	44274080	downstream	NM_001113738	ARL17A	ADP-ribosylation factor-like 17-like isoform a	18.3199	4.19534	18.3199	up	chr17	-	44412267	44439163
CF135687	lincRNA-LHFPL2	7.28266	2.86447	7.28266	up	lincRNA	600	chr5	-	77806192	78065844	downstream	NM_004866	SCAMP1	secretory carrier-associated membrane protein 1	8.44711	3.07846	8.44711	up	chr5	+	77656338	77776562
AF083120		2.34474	1.22943	2.34474	up	misc_RNA	158	chr11	+	62321164	62321291	downstream	NM_001081491	NXF1	nuclear RNA export factor 1 isoform 2	-2.31285	-1.20967	2.31285	down	chr11	-	62559597	62572964
ENST00000393071	AC013474.3	16.8524	4.07488	16.8524	up	Ensembl	732	chr2	-	127315006	127315739	upstream	NM_002101	GYPC	glycophorin-C isoform 1	-2.13056	-1.09123	2.13056	down	chr2	+	127413683	127454246
ENST00000430422	RP11-314A15.1	2.9333	1.55253	2.9333	up	Ensembl	1160	chrX	+	65014186	65015677	downstream	NM_007268	VSIG4	V-set and immunoglobulin domain-containing	5.84921	2.54824	5.84921	up	chrX	-	65241579	65259967
DA453447	lincRNA-CLDN18	-2.04658	-1.03322	2.04658	down	lincRNA	557	chr3	-	137766396	137766951	upstream	NM_173543	DZIP1L	zinc finger protein DZIP1L isoform 1	-8.31178	-3.05516	8.31178	down	chr3	-	137780826	137834451
NR_024279	FLJ37453	-3.13715	-1.64946	3.13715	down	RefSeq_NR	2732	chr1	-	16160709	16174642	upstream	NM_014424	HSPB7	heat shock protein beta-7	-2.15698	-1.10902	2.15698	down	chr1	-	16340522	16345285
CR749501		2.63057	1.39538	2.63057	up	misc_RNA	4374	chr5	+	80201444	80205745	upstream	NM_000791	DHFR	dihydrofolate reductase	4.64765	2.2165	4.64765	up	chr5	-	79922044	79950800
AK095243		4.05763	2.02064	4.05763	up	misc_RNA	2460	chr17	-	39805306	39807765	upstream	NM_021939	FKBP10	peptidyl-prolyl cis-trans isomerase FKBP10	5.17376	2.37121	5.17376	up	chr17	+	39968961	39979469
AK094723		12.8915	3.68835	12.8915	up	misc_RNA	2466	chr17	+	39821817	39824283	downstream	NM_021939	FKBP10	peptidyl-prolyl cis-trans isomerase FKBP10	5.17376	2.37121	5.17376	up	chr17	+	39968961	39979469
AL137390	lincRNA-NKAIN3	36.9922	5.20915	36.9922	up	lincRNA	1202	chr8	+	62791440	62798121	upstream	NM_001164755	ASPH	aspartyl/asparaginyl beta-hydroxylase isoform k	5.16401	2.36849	5.16401	up	chr8	-	62536268	62627199
BU664086	lincRNA-ENAH-1	-2.2633	-1.17843	2.2633	down	lincRNA	687	chr1	-	225860476	225861152	downstream	NM_001008493	ENAH	protein enabled homolog isoform a	4.33476	2.11595	4.33476	up	chr1	-	225674533	225840845
ENST00000487840	RP11-167H9.4	-2.0789	-1.05582	2.0789	down	Ensembl	372	chr3	+	149757000	149931401	upstream	NM_183381	RNF13	E3 ubiquitin-protein ligase RNF13	3.35054	1.74439	3.35054	up	chr3	+	149530474	149679925
AB051448		4.03378	2.01213	4.03378	up	NRED	6475	chr22	-	45373647	45476304	downstream	NM_181335	ARHGAP8	rho GTPase-activating protein 8 isoform 2	4.64744	2.21644	4.64744	up	chr22	+	45148437	45258664
BC058549	lincRNA-PLCE1	-2.16957	-1.11741	2.16957	down	lincRNA	737	chr10	+	95653757	95713998	downstream	NM_001165979	PLCE1	1-phosphatidylinositol-4,5-bisphosphate	-3.37907	-1.75663	3.37907	down	chr10	+	95848829	96088148
chr10:95567958-95575624-	lincRNA-LGI1	-2.58953	-1.37269	2.58953	down	lincRNA	7667	chr10	-	95567958	95575624	upstream	NM_001165979	PLCE1	1-phosphatidylinositol-4,5-bisphosphate	-3.37907	-1.75663	3.37907	down	chr10	+	95848829	96088148
AK090904		2.2486	1.16903	2.2486	up	RNAdb	2547	chr4	+	128759331	128761879	upstream	NM_014278	HSPA4L	heat shock 70 kDa protein 4L	2.24082	1.16403	2.24082	up	chr4	+	128703452	128754526
uc003ifn.2	AK090904	5.32488	2.41275	5.32488	up	UCSC_knowngene	2962	chr4	+	128758921	128761883	upstream	NM_014278	HSPA4L	heat shock 70 kDa protein 4L	2.24082	1.16403	2.24082	up	chr4	+	128703452	128754526
NR_027481	ZNF876P	3.28464	1.71574	3.28464	up	RefSeq_NR	2621	chr4	+	206388	249771	downstream	NM_003441	ZNF141	zinc finger protein 141	2.34819	1.23155	2.34819	up	chr4	+	331595	367691
CK905913	lincRNA-TTC17-2	-2.14203	-1.09898	2.14203	down	lincRNA	587	chr11	-	43606137	43694943	upstream	NM_001145033	C11orf96	protein Ag2 homolog	4.08983	2.03204	4.08983	up	chr11	+	43964105	43965433
DA955413	lincRNA-FAM65A-1	-17.2583	-4.10922	17.2583	down	lincRNA	562	chr16	+	67552113	67552675	upstream	NM_018296	LRRC36	leucine-rich repeat-containing protein 36	2.53184	1.34018	2.53184	up	chr16	+	67360746	67419109
CN315150	lincRNA-FAM65A-3	-2.83035	-1.50098	2.83035	down	lincRNA	705	chr16	+	67536554	67537247	upstream	NM_018296	LRRC36	leucine-rich repeat-containing protein 36	2.53184	1.34018	2.53184	up	chr16	+	67360746	67419109
BG210561	lincRNA-AGRP-2	-3.12553	-1.6441	3.12553	down	lincRNA	697	chr16	-	67551608	67552290	downstream	NM_018296	LRRC36	leucine-rich repeat-containing protein 36	2.53184	1.34018	2.53184	up	chr16	+	67360746	67419109
ENST00000505100	CTB-179I1.3	-2.7877	-1.47908	2.7877	down	Ensembl	463	chr4	-	78137565	78138028	downstream	NM_018243	SEPT11	septin-11	11.9182	3.5751	11.9182	up	chr4	+	77870894	77959768
AL137390	lincRNA-NKAIN3	36.9922	5.20915	36.9922	up	lincRNA	1202	chr8	+	62791440	62798121	upstream	NM_032467	ASPH	aspartyl/asparaginyl beta-hydroxylase isoform d	3.58	1.83996	3.58	up	chr8	-	62575376	62602408
DA223008	lincRNA-PARP11-3	-3.42893	-1.77776	3.42893	down	lincRNA	495	chr12	-	4361900	4384231	upstream	NM_020375	C12orf5	probable fructose-2,6-bisphosphatase TIGAR	3.3077	1.72583	3.3077	up	chr12	+	4430358	4469190
chr20:541348-562112-	lincRNA-CSNK2A1	-3.54682	-1.82653	3.54682	down	lincRNA	20765	chr20	-	541348	562112	downstream	NM_006462	RBCK1	ranBP-type and C3HC4-type zinc finger-containing	-2.11404	-1.08	2.11404	down	chr20	+	388708	411610
chr11:118574515-118584690-	lincRNA-TREH	-6.19672	-2.6315	6.19672	down	lincRNA	10176	chr11	-	118574515	118584690	downstream	NM_001655	ARCN1	coatomer subunit delta isoform 1	3.99754	1.99911	3.99754	up	chr11	+	118443101	118473747
AK022887		4.22161	2.07779	4.22161	up	RNAdb	2629	chr12	+	54513394	54516023	downstream	NM_031157	HNRNPA1	heterogeneous nuclear ribonucleoprotein A1	2.40493	1.266	2.40493	up	chr12	+	54674487	54679030
NR_026655	FLJ12825	-2.3437	-1.22879	2.3437	down	RefSeq_NR	3942	chr12	+	54452037	54516018	downstream	NM_031157	HNRNPA1	heterogeneous nuclear ribonucleoprotein A1	2.40493	1.266	2.40493	up	chr12	+	54674487	54679030
ENST00000504210	RP11-834C11.8	-5.58926	-2.48266	5.58926	down	Ensembl	403	chr12	+	54556922	54562379	downstream	NM_031157	HNRNPA1	heterogeneous nuclear ribonucleoprotein A1	2.40493	1.266	2.40493	up	chr12	+	54674487	54679030
NR_026656	LOC400043	3.9435	1.97948	3.9435	up	RefSeq_NR	1411	chr12	+	54519854	54526619	downstream	NM_031157	HNRNPA1	heterogeneous nuclear ribonucleoprotein A1	2.40493	1.266	2.40493	up	chr12	+	54674487	54679030
ENST00000513381	RP11-834C11.5	2.79687	1.48382	2.79687	up	Ensembl	499	chr12	-	54478915	54519614	upstream	NM_031157	HNRNPA1	heterogeneous nuclear ribonucleoprotein A1	2.40493	1.266	2.40493	up	chr12	+	54674487	54679030
uc002msx.1	AX747405	-6.3389	-2.66423	6.3389	down	UCSC_knowngene	1801	chr19	+	12098431	12138553	downstream	NM_001136501	ZNF844	zinc finger protein 844	-3.19745	-1.67692	3.19745	down	chr19	+	12175545	12188626
CA502833	lincRNA-C13orf31-2	-5.14868	-2.3642	5.14868	down	lincRNA	725	chr13	-	44649456	44650165	upstream	NM_001010897	SERP2	stress-associated endoplasmic reticulum protein	-2.86536	-1.51871	2.86536	down	chr13	+	44947977	44971850
uc001uzl.2	BC025370	-31.2197	-4.96439	31.2197	down	UCSC_knowngene	976	chr13	-	44974387	44980021	downstream	NM_001010897	SERP2	stress-associated endoplasmic reticulum protein	-2.86536	-1.51871	2.86536	down	chr13	+	44947977	44971850
ENST00000432701	RP11-269C23.3	-2.6172	-1.38802	2.6172	down	Ensembl	858	chr13	-	44974486	44980002	downstream	NM_001010897	SERP2	stress-associated endoplasmic reticulum protein	-2.86536	-1.51871	2.86536	down	chr13	+	44947977	44971850
uc001uzi.1	AX748251	-8.09144	-3.0164	8.09144	down	UCSC_knowngene	1961	chr13	-	44835105	44837066	upstream	NM_001010897	SERP2	stress-associated endoplasmic reticulum protein	-2.86536	-1.51871	2.86536	down	chr13	+	44947977	44971850
AK130806		-4.89997	-2.29277	4.89997	down	misc_RNA	1439	chr10	+	114590927	114592210	downstream	NM_001146284	TCF7L2	transcription factor 7-like 2 isoform 4	2.23039	1.1573	2.23039	up	chr10	+	114710008	114927436
AK289744	lincRNA-SUN2	-3.80601	-1.92828	3.80601	down	lincRNA	2725	chr22	-	39131913	39190148	downstream	NM_020243	TOMM22	mitochondrial import receptor subunit TOM22	2.86654	1.51931	2.86654	up	chr22	+	39077953	39080766
BF724558	lincRNA-MCL1	5.74074	2.52124	5.74074	up	lincRNA	428	chr1	+	150544341	150545215	upstream	NM_031901	MRPS21	28S ribosomal protein S21, mitochondrial	2.41821	1.27394	2.41821	up	chr1	+	150266268	150280819
uc002huv.2	CR597260	-7.20255	-2.84851	7.20255	down	UCSC_knowngene	1013	chr17	+	38673277	38683253	downstream	NM_152349	KRT222	keratin-like protein KRT222	-14.4727	-3.85526	14.4727	down	chr17	-	38811871	38821416
chr3:13577339-13583378-	lincRNA-HDAC11-1	-3.16083	-1.6603	3.16083	down	lincRNA	6040	chr3	-	13577339	13583378	upstream	NM_001998	FBLN2	fibulin-2 isoform b precursor	3.26839	1.70858	3.26839	up	chr3	+	13590624	13679922
chr4:114709776-114720551-	lincRNA-CAMK2D	-2.52314	-1.33522	2.52314	down	lincRNA	10776	chr4	-	114709776	114720551	downstream	NM_172115	CAMK2D	calcium/calmodulin-dependent protein kinase type	2.73381	1.45092	2.73381	up	chr4	-	114378343	114683083
chr4:114709776-114720551+	lincRNA-ARSJ-1	-2.2001	-1.13757	2.2001	down	lincRNA	10776	chr4	+	114709776	114720551	upstream	NM_172115	CAMK2D	calcium/calmodulin-dependent protein kinase type	2.73381	1.45092	2.73381	up	chr4	-	114378343	114683083
BC043564	lincRNA-KCNA2-1	-35.6463	-5.15568	35.6463	down	lincRNA	2022	chr1	-	111136202	111174096	upstream	NM_001040033	CD53	leukocyte surface antigen CD53	-5.24853	-2.39191	5.24853	down	chr1	+	111413820	111442558
chrX:102236694-102253244-	lincRNA-RAB40AL-1	-2.54696	-1.34878	2.54696	down	lincRNA	16551	chrX	-	102236694	102253244	upstream	NM_001127688	BEX4	protein BEX4	-4.27807	-2.09696	4.27807	down	chrX	+	102470019	102472095
NR_027441	FLJ36777	-2.09088	-1.06411	2.09088	down	RefSeq_NR	2140	chr4	-	7099150	7105103	downstream	NM_014743	KIAA0232	hypothetical protein LOC9778	2.01298	1.00933	2.01298	up	chr4	+	6784458	6885899
ENST00000504402	RP11-367J11.3	-9.47525	-3.24416	9.47525	down	Ensembl	292	chr4	-	7096297	7105056	downstream	NM_014743	KIAA0232	hypothetical protein LOC9778	2.01298	1.00933	2.01298	up	chr4	+	6784458	6885899
chr7:73684091-73687309-	lincRNA-RFC2	-2.20092	-1.13811	2.20092	down	lincRNA	3219	chr7	-	73684091	73687309	downstream	NM_031992	EIF4H	eukaryotic translation initiation factor 4H	2.12118	1.08487	2.12118	up	chr7	+	73588705	73611429
AK293746	lincRNA-NDST1-2	2.49547	1.31931	2.49547	up	lincRNA	3451	chr5	+	149877339	149933276	upstream	NM_001012301	ARSI	arylsulfatase I precursor	6.61417	2.72556	6.61417	up	chr5	-	149675908	149682525
AI218855	lincRNA-RPS14-2	-5.7829	-2.53179	5.7829	down	lincRNA	269	chr5	-	149855120	149864849	downstream	NM_001012301	ARSI	arylsulfatase I precursor	6.61417	2.72556	6.61417	up	chr5	-	149675908	149682525
ENST00000426284	AC096772.4	2.2777	1.18758	2.2777	up	Ensembl	444	chr2	+	208546313	208546757	upstream	NM_001127395	METTL21A	methyltransferase-like protein 21A	2.75246	1.46072	2.75246	up	chr2	-	208473838	208489973
ENST00000429730	AC079767.4	-9.10238	-3.18624	9.10238	down	Ensembl	492	chr2	+	208527098	208531748	upstream	NM_001127395	METTL21A	methyltransferase-like protein 21A	2.75246	1.46072	2.75246	up	chr2	-	208473838	208489973
BP264199	lincRNA-GCNT3	-4.52289	-2.17725	4.52289	down	lincRNA	578	chr15	+	59848253	59911852	upstream	NM_152450	FAM81A	hypothetical protein LOC145773	2.6894	1.42729	2.6894	up	chr15	+	59730371	59815751
ENST00000396071	AC092868.2	3.90267	1.96446	3.90267	up	Ensembl	777	chr15	-	59693421	59694203	upstream	NM_152450	FAM81A	hypothetical protein LOC145773	2.6894	1.42729	2.6894	up	chr15	+	59730371	59815751
DA223008	lincRNA-PARP11-3	-3.42893	-1.77776	3.42893	down	lincRNA	495	chr12	-	4361900	4384231	overlap	NM_001759	CCND2	G1/S-specific cyclin-D2	2.9775	1.5741	2.9775	up	chr12	+	4382901	4414522
AK297025	lincRNA-FGD4	2.22138	1.15145	2.22138	up	lincRNA	2924	chr12	+	32638905	32793673	downstream	NM_005690	DNM1L	dynamin-1-like protein isoform 3	2.56976	1.36163	2.56976	up	chr12	+	32832136	32898584
ENST00000444862	AP005273.1	-2.93067	-1.55123	2.93067	down	Ensembl	522	chr11	+	64268324	64272858	upstream	NM_001006944	RPS6KA4	ribosomal protein S6 kinase alpha-4 isoform b	2.49356	1.3182	2.49356	up	chr11	+	64126624	64139687
DA335757	lincRNA-ZDHHC22	11.1113	3.47396	11.1113	up	lincRNA	597	chr14	+	77571996	77691805	downstream	NM_001010860	SAMD15	sterile alpha motif domain-containing protein	-6.06645	-2.60085	6.06645	down	chr14	+	77843761	77857587
uc001xsz.2	BC038792	-9.08337	-3.18323	9.08337	down	UCSC_knowngene	364	chr14	-	77514515	77547598	upstream	NM_001010860	SAMD15	sterile alpha motif domain-containing protein	-6.06645	-2.60085	6.06645	down	chr14	+	77843761	77857587
AK091103		-3.01221	-1.59082	3.01221	down	misc_RNA	1924	chr4	-	174289045	174290964	upstream	NM_021973	HAND2	heart- and neural crest derivatives-expressed	-2.61005	-1.38408	2.61005	down	chr4	-	174447651	174451378
BE048920	lincRNA-FBXL4	2.65467	1.40854	2.65467	up	lincRNA	329	chr6	+	99293092	99293421	downstream	NM_012160	FBXL4	F-box/LRR-repeat protein 4	2.00137	1.00099	2.00137	up	chr6	-	99321600	99395849
uc003jnb.1	AK056817	-2.04586	-1.03271	2.04586	down	UCSC_knowngene	2757	chr5	-	42985502	42993435	upstream	NM_003432	ZNF131	zinc finger protein 131	4.03142	2.01129	4.03142	up	chr5	+	43121641	43175823
uc003srb.1	CR609701	-2.06629	-1.04704	2.06629	down	UCSC_knowngene	3988	chr7	+	7284224	7288212	downstream	NM_001037763	COL28A1	collagen alpha-1(XXVIII) chain precursor	-14.3562	-3.8436	14.3562	down	chr7	-	7398243	7575460
CR604878		2.34499	1.22958	2.34499	up	NRED	1220	chr4	-	56814122	56815341	upstream	NM_020722	KIAA1211	hypothetical protein LOC57482	4.0584	2.02091	4.0584	up	chr4	+	57036360	57196890
chr16:84296674-84307824+	lincRNA-WFDC1	-2.65977	-1.4113	2.65977	down	lincRNA	11151	chr16	+	84296674	84307824	downstream	NM_014861	ATP2C2	calcium-transporting ATPase type 2C member 2	-17.6023	-4.13769	17.6023	down	chr16	+	84402132	84497793
BQ441593	lincRNA-KIAA1383-2	5.3226	2.41213	5.3226	up	lincRNA	873	chr1	+	232900234	232900789	downstream	NM_014801	PCNXL2	pecanex-like protein 2	6.10287	2.60949	6.10287	up	chr1	-	233119881	233431459
ENST00000419425	AC006369.2	-3.94631	-1.98051	3.94631	down	Ensembl	548	chr2	+	37827278	37873841	upstream	NM_012413	QPCT	glutaminyl-peptide cyclotransferase precursor	-2.098	-1.06901	2.098	down	chr2	+	37571752	37600465
BM956062	lincRNA-PGS1	5.70521	2.51228	5.70521	up	lincRNA	174	chr17	+	76360558	76360732	upstream	NM_152468	TMC8	transmembrane channel-like protein 8	-2.95415	-1.56274	2.95415	down	chr17	+	76126858	76139049
ENST00000423943	RP11-48O20.4	-8.26514	-3.04704	8.26514	down	Ensembl	1113	chr1	+	159931013	159948851	upstream	NM_001004310	FCRL6	Fc receptor-like protein 6 precursor	-16.6717	-4.05933	16.6717	down	chr1	+	159772172	159786047
chr6:150606082-150619632+	lincRNA-IYD	-2.60916	-1.38358	2.60916	down	lincRNA	13551	chr6	+	150606082	150619632	upstream	NM_030949	PPP1R14C	protein phosphatase 1 regulatory subunit 14C	-3.99545	-1.99836	3.99545	down	chr6	+	150464187	150571528
chr11:8215149-8227449-	lincRNA-RIC3	-2.09361	-1.06599	2.09361	down	lincRNA	12301	chr11	-	8215149	8227449	downstream	NM_001135109	RIC3	protein RIC-3 isoform b	-2.4393	-1.28647	2.4393	down	chr11	-	8127596	8190590
NR_027113	LOC285740	-4.2691	-2.09393	4.2691	down	RefSeq_NR	1514	chr6	-	143875466	143890476	upstream	NM_032860	LTV1	protein LTV1 homolog	2.21572	1.14778	2.21572	up	chr6	+	144164507	144184943
ENST00000450575	RP11-436I24.1	10.2414	3.35634	10.2414	up	Ensembl	1699	chr6	-	143875461	143883168	upstream	NM_032860	LTV1	protein LTV1 homolog	2.21572	1.14778	2.21572	up	chr6	+	144164507	144184943
DN918055	lincRNA-SGIP1	2.4893	1.31574	2.4893	up	lincRNA	399	chr1	+	66890612	67423817	overlap	NM_207014	WDR78	WD repeat-containing protein 78 isoform 2	-6.05967	-2.59924	6.05967	down	chr1	-	67303281	67390570
DN918054	lincRNA-PDE4B	-2.1129	-1.07922	2.1129	down	lincRNA	400	chr1	-	66890612	67423817	overlap	NM_207014	WDR78	WD repeat-containing protein 78 isoform 2	-6.05967	-2.59924	6.05967	down	chr1	-	67303281	67390570
BG679513	lincRNA-KCNT2-2	2.00837	1.00603	2.00837	up	lincRNA	868	chr1	+	193254821	193255677	upstream	NM_001042370	TROVE2	60 kDa SS-A/Ro ribonucleoprotein isoform 3	2.95821	1.56472	2.95821	up	chr1	+	193029003	193060906
DA088898	lincRNA-INCENP	2.60473	1.38113	2.60473	up	lincRNA	560	chr11	+	61740183	61740743	downstream	NM_002407	SCGB2A1	mammaglobin-B precursor	-84.5407	-6.40157	84.5407	down	chr11	+	61976139	61981411
AB051448		4.03378	2.01213	4.03378	up	NRED	6475	chr22	-	45373647	45476304	downstream	NM_001017530	PRR5	proline-rich protein 5 isoform 3	-5.33752	-2.41617	5.33752	down	chr22	+	45072687	45133561
CR615581	lincRNA-ANGPT4	-2.14493	-1.10093	2.14493	down	lincRNA	1325	chr20	+	825766	838103	overlap	NM_207121	FAM110A	hypothetical protein LOC83541	2.12629	1.08834	2.12629	up	chr20	+	816710	826922
BE244504	lincRNA-FAM110A	5.09107	2.34797	5.09107	up	lincRNA	447	chr20	-	837118	837565	downstream	NM_207121	FAM110A	hypothetical protein LOC83541	2.12629	1.08834	2.12629	up	chr20	+	816710	826922
chr20:541348-562112-	lincRNA-CSNK2A1	-3.54682	-1.82653	3.54682	down	lincRNA	20765	chr20	-	541348	562112	upstream	NM_207121	FAM110A	hypothetical protein LOC83541	2.12629	1.08834	2.12629	up	chr20	+	816710	826922
BI029614	lincRNA-ERF	-2.17395	-1.12032	2.17395	down	lincRNA	493	chr19	-	42777698	42778182	upstream	NM_001145939	PAFAH1B3	platelet-activating factor acetylhydrolase IB	3.01155	1.5905	3.01155	up	chr19	-	42801184	42806929
chr1:231020477-231031277+	lincRNA-TTC13	-2.04212	-1.03006	2.04212	down	lincRNA	10801	chr1	+	231020477	231031277	upstream	NM_016452	CAPN9	calpain-9 isoform 2	-15.161	-3.9223	15.161	down	chr1	+	230883160	230937749
BC034819		2.28179	1.19017	2.28179	up	NRED	2882	chr4	+	153457444	153460292	downstream	NM_014447	ARFIP1	arfaptin-1 isoform 2	2.77727	1.47367	2.77727	up	chr4	+	153701111	153833063
chr8:16980864-16988341-	lincRNA-EFHA2-1	-2.36313	-1.2407	2.36313	down	lincRNA	7478	chr8	-	16980864	16988341	upstream	NM_054026	CNOT7	CCR4-NOT transcription complex subunit 7 isoform	2.16107	1.11174	2.16107	up	chr8	-	17089021	17104387
NR_015442	LOC401397	2.97623	1.57349	2.97623	up	RefSeq_NR	1055	chr7	-	112756773	112758637	downstream	NM_152556	C7orf60	hypothetical protein LOC154743	2.52787	1.33792	2.52787	up	chr7	-	112459201	112579932
NR_024412	LOC401397	3.73646	1.90167	3.73646	up	RefSeq_NR	1143	chr7	-	112756773	112758637	downstream	NM_152556	C7orf60	hypothetical protein LOC154743	2.52787	1.33792	2.52787	up	chr7	-	112459201	112579932
ENST00000432147	RP4-735C1.5	6.9127	2.78925	6.9127	up	Ensembl	355	chr1	-	110353265	110353620	downstream	NM_000848	GSTM2	glutathione S-transferase Mu 2 isoform 1	-6.24502	-2.64271	6.24502	down	chr1	+	110210643	110217908
uc001wxl.2	BC084561	-3.54052	-1.82396	3.54052	down	UCSC_knowngene	2301	chr14	-	50504312	50507947	upstream	NM_024558	METTL21D	methyltransferase-like protein 21D isoform a	2.62043	1.3898	2.62043	up	chr14	-	50575349	50583297
BU690073	lincRNA-CCDC33	-5.68354	-2.50679	5.68354	down	lincRNA	416	chr15	+	74513616	74513896	upstream	NM_033240	PML	protein PML isoform 2	2.40685	1.26715	2.40685	up	chr15	+	74287013	74328735
chr15:74197716-74198633-	lincRNA-TBC1D21-1	-2.08145	-1.05759	2.08145	down	lincRNA	918	chr15	-	74197716	74198633	upstream	NM_033240	PML	protein PML isoform 2	2.40685	1.26715	2.40685	up	chr15	+	74287013	74328735
ENST00000427151	AC129929.5	2.03219	1.02304	2.03219	up	Ensembl	1171	chr11	-	2349978	2399219	upstream	NM_181798	KCNQ1	potassium voltage-gated channel subfamily KQT	-2.09459	-1.06667	2.09459	down	chr11	+	2482683	2870340
chr11:2448349-2458849-	lincRNA-TRPM5	-2.20886	-1.1433	2.20886	down	lincRNA	10501	chr11	-	2448349	2458849	upstream	NM_181798	KCNQ1	potassium voltage-gated channel subfamily KQT	-2.09459	-1.06667	2.09459	down	chr11	+	2482683	2870340
DA922283	lincRNA-TH	4.68973	2.2295	4.68973	up	lincRNA	568	chr11	-	2229882	2230451	upstream	NM_181798	KCNQ1	potassium voltage-gated channel subfamily KQT	-2.09459	-1.06667	2.09459	down	chr11	+	2482683	2870340
uc001mkl.1	AK001432	2.67817	1.42125	2.67817	up	UCSC_knowngene	1558	chr11	-	13001081	13011095	upstream	NM_001030272	ARNTL	aryl hydrocarbon receptor nuclear	2.89268	1.53241	2.89268	up	chr11	+	13299324	13408812
chr13:20881350-20901600+	lincRNA-CRYL1	2.12363	1.08653	2.12363	up	lincRNA	20251	chr13	+	20881350	20901600	downstream	NM_175605	IFT88	intraflagellar transport protein 88 homolog	-2.93088	-1.55133	2.93088	down	chr13	+	21141207	21265576
ENST00000505100	CTB-179I1.3	-2.7877	-1.47908	2.7877	down	Ensembl	463	chr4	-	78137565	78138028	downstream	NM_004354	CCNG2	cyclin-G2	3.94276	1.97921	3.94276	up	chr4	+	78078356	78091213
DY655635	lincRNA-C16orf75-2	-2.69833	-1.43207	2.69833	down	lincRNA	379	chr16	-	11477618	11478868	downstream	NM_152308	C16orf75	recQ-mediated genome instability protein 2	13.0076	3.70129	13.0076	up	chr16	+	11439310	11445617
BC030711	lincRNA-PROKR1	-2.89714	-1.53463	2.89714	down	lincRNA	1708	chr2	+	68756772	68857856	upstream	NM_002664	PLEK	pleckstrin	2.8959	1.53401	2.8959	up	chr2	+	68592321	68624585
AA863287	lincRNA-OR2AG2	-3.59825	-1.8473	3.59825	down	lincRNA	519	chr11	+	6754957	6767657	upstream	NM_022061	MRPL17	39S ribosomal protein L17, mitochondrial	2.68773	1.42639	2.68773	up	chr11	-	6701615	6704632
chr11:8215149-8227449-	lincRNA-RIC3	-2.09361	-1.06599	2.09361	down	lincRNA	12301	chr11	-	8215149	8227449	downstream	NM_024557	RIC3	protein RIC-3 isoform a	-3.71714	-1.89419	3.71714	down	chr11	-	8127596	8190590
NR_027064	PLAC2	-2.73082	-1.44934	2.73082	down	RefSeq_NR	3693	chr19	-	5558179	5568005	upstream	NM_152784	TMEM146	transmembrane protein 146 precursor	2.79037	1.48045	2.79037	up	chr19	+	5720687	5778742
AW361687	lincRNA-LNX2	-2.75784	-1.46354	2.75784	down	lincRNA	601	chr13	+	28003341	28423867	downstream	NM_175854	PAN3	PAB-dependent poly(A)-specific ribonuclease	-2.29761	-1.20013	2.29761	down	chr13	+	28712642	28869475
ENST00000444862	AP005273.1	-2.93067	-1.55123	2.93067	down	Ensembl	522	chr11	+	64268324	64272858	upstream	NM_003377	VEGFB	vascular endothelial growth factor B precursor	-2.08113	-1.05737	2.08113	down	chr11	+	64002265	64006259
AA999834	lincRNA-MRPS28	2.00535	1.00385	2.00535	up	lincRNA	536	chr8	+	80830635	80942325	downstream	NM_001025253	TPD52	tumor protein D52 isoform 2	-2.84173	-1.50677	2.84173	down	chr8	-	80947104	81083836
uc003cmy.1	AK124776	-39.5088	-5.3041	39.5088	down	UCSC_knowngene	4060	chr3	+	44159797	44163857	downstream	NM_001029839	C3orf23	tolerance associated gene-1 isoform 2	4.84929	2.27777	4.84929	up	chr3	+	44379943	44401294
ENST00000501118	AC010733.1	-4.3865	-2.13307	4.3865	down	Ensembl	2828	chr2	+	61159962	61163467	downstream	NM_001129993	KIAA1841	KIAA1841 protein isoform a	-2.85358	-1.51277	2.85358	down	chr2	+	61293005	61351413
DB334150	lincRNA-PRKCE-2	-10.3913	-3.3773	10.3913	down	lincRNA	550	chr2	+	45875869	45876417	downstream	NM_005400	PRKCE	protein kinase C epsilon type	-2.56996	-1.36175	2.56996	down	chr2	+	45879042	46415129
chr10:44001669-44017744-	lincRNA-HNRNPF	-2.55255	-1.35194	2.55255	down	lincRNA	16076	chr10	-	44001669	44017744	downstream	NM_001098205	HNRNPF	heterogeneous nuclear ribonucleoprotein F	-3.07556	-1.62085	3.07556	down	chr10	-	43881064	43904332
uc003che.2	BC040563	-5.39832	-2.43251	5.39832	down	UCSC_knowngene	3263	chr3	-	37847343	37903250	upstream	NM_007335	DLEC1	deleted in lung and esophageal cancer protein 1	-3.02701	-1.59789	3.02701	down	chr3	+	38080695	38164228
BG401674	lincRNA-AKAP8	-3.24052	-1.69623	3.24052	down	lincRNA	945	chr19	+	15424346	15425051	upstream	NM_001004713	OR1I1	olfactory receptor 1I1	-2.77864	-1.47438	2.77864	down	chr19	+	15197876	15198944
CN284611	lincRNA-CUX2	-2.9458	-1.55866	2.9458	down	lincRNA	731	chr12	+	111378154	111378886	upstream	NM_001173976	TCTN1	tectonic-1 isoform 5	-2.05175	-1.03685	2.05175	down	chr12	+	111051831	111086935
AK125021		-2.06058	-1.04305	2.06058	down	misc_RNA	4140	chr11	-	107182857	107186997	downstream	NM_000855	GUCY1A2	guanylate cyclase soluble subunit alpha-2	7.32565	2.87296	7.32565	up	chr11	-	106557909	106889171
exon94-	lincRNA-DMBX1	2.50663	1.32575	2.50663	up	lincRNA	161	chr1	-	46996996	46997156	upstream	NM_000779	CYP4B1	cytochrome P450 4B1 isoform b	-2.39839	-1.26207	2.39839	down	chr1	+	47264669	47285021
exon91+	lincRNA-KNCN	-2.18488	-1.12755	2.18488	down	lincRNA	175	chr1	+	46989750	46989924	downstream	NM_000779	CYP4B1	cytochrome P450 4B1 isoform b	-2.39839	-1.26207	2.39839	down	chr1	+	47264669	47285021
exon90+	lincRNA-KNCN	-2.88201	-1.52708	2.88201	down	lincRNA	643	chr1	+	46985867	46986509	downstream	NM_000779	CYP4B1	cytochrome P450 4B1 isoform b	-2.39839	-1.26207	2.39839	down	chr1	+	47264669	47285021
AK057313	lincRNA-PTPN4	-9.56269	-3.25742	9.56269	down	lincRNA	2048	chr2	+	120436774	120481191	overlap	NM_001105198	TMEM177	transmembrane protein 177	7.57751	2.92172	7.57751	up	chr2	+	120436742	120439694
BX101114	lincRNA-ERMN	-3.39676	-1.76416	3.39676	down	lincRNA	796	chr2	-	158215198	158215993	upstream	NM_004288	CYTIP	cytohesin-interacting protein	-4.90562	-2.29444	4.90562	down	chr2	-	158271130	158300604
chr4:99107102-99123402+	lincRNA-RAP1GDS1	2.67133	1.41756	2.67133	up	lincRNA	16301	chr4	+	99107102	99123402	downstream	NM_001100426	RAP1GDS1	rap1 GTPase-GDP dissociation stimulator 1	3.13496	1.64845	3.13496	up	chr4	+	99182526	99365012
AW993564	lincRNA-MAPK1IP1L-1	-4.48672	-2.16566	4.48672	down	lincRNA	503	chr14	-	55509240	55739892	overlap	NM_080867	SOCS4	suppressor of cytokine signaling 4	2.07471	1.05291	2.07471	up	chr14	+	55493843	55516206
ENST00000394662	RP4-644F6.3	8.83266	3.14285	8.83266	up	Ensembl	1740	chr1	+	89875877	89891802	upstream	NM_198460	GBP6	guanylate-binding protein 6	-7.23698	-2.85539	7.23698	down	chr1	+	89829435	89853719
BC036122	lincRNA-LRRC8D-2	-2.38276	-1.25264	2.38276	down	lincRNA	3001	chr1	+	90098630	90230061	upstream	NM_198460	GBP6	guanylate-binding protein 6	-7.23698	-2.85539	7.23698	down	chr1	+	89829435	89853719
NR_003133	LOC400759	3.37955	1.75683	3.37955	up	RefSeq_NR	1234	chr1	+	89873237	89890493	upstream	NM_198460	GBP6	guanylate-binding protein 6	-7.23698	-2.85539	7.23698	down	chr1	+	89829435	89853719
ENST00000411949	AC006460.2	2.92888	1.55035	2.92888	up	Ensembl	717	chr2	-	191541760	191573442	upstream	NM_007315	STAT1	signal transducer and activator of transcription	2.47318	1.30637	2.47318	up	chr2	-	191833761	191878976
BF108976	lincRNA-MYO1B-4	-2.51868	-1.33267	2.51868	down	lincRNA	509	chr2	+	192068946	192069452	upstream	NM_007315	STAT1	signal transducer and activator of transcription	2.47318	1.30637	2.47318	up	chr2	-	191833761	191878976
ENST00000452336	RP4-530I15.6	-6.02748	-2.59155	6.02748	down	Ensembl	638	chr20	+	49262007	49276828	downstream	NM_017843	BCAS4	breast carcinoma-amplified sequence 4 isoform a	2.03464	1.02478	2.03464	up	chr20	+	49411466	49493714
chr10:112078410-112125810+	lincRNA-DUSP5-1	-2.57529	-1.36473	2.57529	down	lincRNA	47401	chr10	+	112078410	112125810	upstream	NM_019903	ADD3	gamma-adducin isoform b	3.06379	1.61532	3.06379	up	chr10	+	111765725	111895323
ENST00000417795	AC034220.3	-2.05858	-1.04165	2.05858	down	Ensembl	1792	chr5	-	131646977	131705608	upstream	NM_001013717	C5orf56	hypothetical protein LOC441108 isoform 1	8.95153	3.16213	8.95153	up	chr5	+	131746672	131798059
ENST00000509266	AC026979.1	-2.63836	-1.39964	2.63836	down	Ensembl	1967	chr8	-	30044816	30047775	upstream	NM_006867	RBPMS	RNA-binding protein with multiple splicing	-3.56381	-1.83342	3.56381	down	chr8	+	30241943	30429734
AK056779		30.197	4.91633	30.197	up	misc_RNA	1969	chr8	+	30044816	30047775	downstream	NM_006867	RBPMS	RNA-binding protein with multiple splicing	-3.56381	-1.83342	3.56381	down	chr8	+	30241943	30429734
chr2:107718693-107737818+	lincRNA-RGPD4-2	2.79473	1.48271	2.79473	up	lincRNA	19126	chr2	+	107718693	107737818	upstream	NM_001142352	ST6GAL2	beta-galactoside alpha-2,6-sialyltransferase 2	3.16788	1.66352	3.16788	up	chr2	-	107429531	107503563
uc003wst.1	LOC157627	-2.86674	-1.51941	2.86674	down	UCSC_knowngene	869	chr8	-	9757573	9758710	upstream	NM_012331	MSRA	peptide methionine sulfoxide reductase isoform	-2.63546	-1.39805	2.63546	down	chr8	+	9911829	10286401
ENST00000411846	RP11-483I13.4	-11.8126	-3.56225	11.8126	down	Ensembl	1570	chr1	+	108815564	108880475	upstream	NM_001143989	NBPF4	neuroblastoma breakpoint family, member 4	-2.98794	-1.57915	2.98794	down	chr1	-	108765962	108786703
chr1:109063527-109078202-	lincRNA-NBPF6-1	-2.36957	-1.24462	2.36957	down	lincRNA	14676	chr1	-	109063527	109078202	downstream	NM_001143989	NBPF4	neuroblastoma breakpoint family, member 4	-2.98794	-1.57915	2.98794	down	chr1	-	108765962	108786703
ENST00000512710	AL359643.3	-3.29087	-1.71847	3.29087	down	Ensembl	3273	chr6	-	5031989	5054657	upstream	NM_001164840	LYRM4	LYR motif-containing protein 4 isoform 2	2.03498	1.02501	2.03498	up	chr6	-	5186833	5261172
uc003yrb.2	CR933665	2.16376	1.11354	2.16376	up	UCSC_knowngene	5639	chr8	-	125474739	125486804	upstream	NM_001146160	TATDN1	putative deoxyribonuclease TATDN1 isoform b	2.85649	1.51424	2.85649	up	chr8	-	125500734	125551329
uc002huv.2	CR597260	-7.20255	-2.84851	7.20255	down	UCSC_knowngene	1013	chr17	+	38673277	38683253	upstream	NM_001254	CDC6	cell division control protein 6 homolog	10.1951	3.3498	10.1951	up	chr17	+	38444145	38459413
NR_033182	LOC100130872-SPON2	-2.34889	-1.23198	2.34889	down	RefSeq_NR	729	chr4	-	1165639	1202634	upstream	NM_001017405	MAEA	macrophage erythroblast attacher isoform 1	3.07613	1.62111	3.07613	up	chr4	+	1283671	1333925
AW086055	lincRNA-PRRC2C	2.52497	1.33627	2.52497	up	lincRNA	378	chr1	-	171562278	171562866	downstream	NM_002022	FMO4	dimethylaniline monooxygenase [N-oxide-forming]	2.39136	1.25783	2.39136	up	chr1	+	171283485	171311223
ENST00000424719	RP5-884C9.3	2.81108	1.49112	2.81108	up	Ensembl	338	chr1	-	38546247	38546585	downstream	NM_001142726	C1orf122	hypothetical protein LOC127687 isoform 2	3.66819	1.87507	3.66819	up	chr1	+	38273472	38275126
DA706379	lincRNA-C1QTNF4	2.27066	1.18311	2.27066	up	lincRNA	574	chr11	-	47629926	47630498	downstream	NM_130470	MADD	MAP kinase-activating death domain protein	-21.0982	-4.39905	21.0982	down	chr11	+	47290926	47351582
AX747038	lincRNA-BANK1-2	-58.5261	-5.87101	58.5261	down	lincRNA	3544	chr4	+	102341117	102995967	overlap	NM_001083907	BANK1	B-cell scaffold protein with ankyrin repeats	-9.88028	-3.30455	9.88028	down	chr4	+	102734982	102995969
ENST00000431464	RP11-308D16.4	-8.62836	-3.10909	8.62836	down	Ensembl	646	chrX	+	135991633	136103777	upstream	NM_001164803	RBMX	heterogeneous nuclear ribonucleoprotein G	2.32282	1.21588	2.32282	up	chrX	-	135951352	135962939
ENST00000419357	C6orf214	-2.37913	-1.25043	2.37913	down	Ensembl	264	chr6	-	30766430	30798436	upstream	NM_014070	C6orf15	STG protein precursor	-3.95882	-1.98507	3.95882	down	chr6	-	31078999	31080332
ENST00000514243	RP11-159K7.1	-6.99534	-2.80639	6.99534	down	Ensembl	533	chr5	+	111882669	111883202	upstream	NM_022140	EPB41L4A	band 4.1-like protein 4A	3.25902	1.70444	3.25902	up	chr5	-	111498314	111755010
chr11:118574515-118584690-	lincRNA-TREH	-6.19672	-2.6315	6.19672	down	lincRNA	10176	chr11	-	118574515	118584690	downstream	NM_001142281	ARCN1	coatomer subunit delta isoform 2	-2.841	-1.5064	2.841	down	chr11	+	118443101	118473747
chr8:16980864-16988341-	lincRNA-EFHA2-1	-2.36313	-1.2407	2.36313	down	lincRNA	7478	chr8	-	16980864	16988341	upstream	NM_152415	VPS37A	vacuolar protein sorting-associated protein 37A	2.75969	1.46451	2.75969	up	chr8	+	17104400	17155533
AK091103		-3.01221	-1.59082	3.01221	down	misc_RNA	1924	chr4	-	174289045	174290964	downstream	NM_002129	HMGB2	high mobility group protein B2	3.35039	1.74433	3.35039	up	chr4	-	174252526	174255595
DA088898	lincRNA-INCENP	2.60473	1.38113	2.60473	up	lincRNA	560	chr11	+	61740183	61740743	downstream	NM_001040694	INCENP	inner centromere protein isoform 1	2.92189	1.5469	2.92189	up	chr11	+	61891444	61920635
exon99+	lincRNA-CDCP2	2.03917	1.02798	2.03917	up	lincRNA	715	chr1	+	54587441	54588155	upstream	NM_000792	DIO1	type I iodothyronine deiodinase isoform a	-4.29743	-2.10347	4.29743	down	chr1	+	54359860	54376759
exon98+	lincRNA-CDCP2	2.71446	1.44067	2.71446	up	lincRNA	176	chr1	+	54583893	54584068	upstream	NM_000792	DIO1	type I iodothyronine deiodinase isoform a	-4.29743	-2.10347	4.29743	down	chr1	+	54359860	54376759
uc002uwa.2	AOX2	3.12505	1.64388	3.12505	up	UCSC_knowngene	978	chr2	+	201635394	201658962	downstream	NM_001136039	NIF3L1	NIF3-like protein 1 isoform 1	3.77935	1.91814	3.77935	up	chr2	+	201754049	201768655
ENST00000438772	AC036222.1	2.11264	1.07905	2.11264	up	Ensembl	595	chr17	-	46710868	46724152	upstream	NM_001002027	ATP5G1	ATP synthase lipid-binding protein,	4.73194	2.24243	4.73194	up	chr17	+	46970147	46973232
AK095243		4.05763	2.02064	4.05763	up	misc_RNA	2460	chr17	-	39805306	39807765	downstream	NM_003770	KRT37	keratin, type I cuticular Ha7	-2.81135	-1.49126	2.81135	down	chr17	-	39576808	39580822
AK094723		12.8915	3.68835	12.8915	up	misc_RNA	2466	chr17	+	39821817	39824283	upstream	NM_003770	KRT37	keratin, type I cuticular Ha7	-2.81135	-1.49126	2.81135	down	chr17	-	39576808	39580822
DA877320	lincRNA-SUPT3H-2	-2.81033	-1.49074	2.81033	down	lincRNA	582	chr6	+	44698872	44797742	upstream	NM_001253	CDC5L	cell division cycle 5-like protein	3.86919	1.95203	3.86919	up	chr6	+	44355301	44414780
AK091319		2.33209	1.22162	2.33209	up	misc_RNA	2297	chrX	+	102851535	102853832	upstream	NM_001006612	WBP5	WW domain-binding protein 5	3.86274	1.94962	3.86274	up	chrX	+	102611379	102613397
chr15:74197716-74198633-	lincRNA-TBC1D21-1	-2.08145	-1.05759	2.08145	down	lincRNA	918	chr15	-	74197716	74198633	upstream	NM_001130136	ISLR2	immunoglobulin superfamily containing	-3.06999	-1.61823	3.06999	down	chr15	+	74421714	74429143
BU690073	lincRNA-CCDC33	-5.68354	-2.50679	5.68354	down	lincRNA	416	chr15	+	74513616	74513896	upstream	NM_001130136	ISLR2	immunoglobulin superfamily containing	-3.06999	-1.61823	3.06999	down	chr15	+	74421714	74429143
DA857280	lincRNA-SEMA7A	-3.95244	-1.98275	3.95244	down	lincRNA	581	chr15	+	74683148	74683728	upstream	NM_001130136	ISLR2	immunoglobulin superfamily containing	-3.06999	-1.61823	3.06999	down	chr15	+	74421714	74429143
BM956062	lincRNA-PGS1	5.70521	2.51228	5.70521	up	lincRNA	174	chr17	+	76360558	76360732	upstream	NM_001168	BIRC5	baculoviral IAP repeat-containing protein 5	17.7848	4.15257	17.7848	up	chr17	+	76210276	76221716
BC017431		2.03173	1.02271	2.03173	up	misc_RNA	2097	chr5	+	102183195	102185259	downstream	NM_138821	PAM	peptidyl-glycine alpha-amidating monooxygenase	2.4794	1.30999	2.4794	up	chr5	+	102201526	102366808
uc003ebe.1	AX747798	-40.6731	-5.346	40.6731	down	UCSC_knowngene	3023	chr3	+	113933237	113955051	downstream	NM_001164347	ZBTB20	zinc finger and BTB domain-containing protein 20	-4.70204	-2.23329	4.70204	down	chr3	-	114056946	114343053
ENST00000435967	AC007128.1	-2.12996	-1.09083	2.12996	down	Ensembl	557	chr7	+	8343370	8380973	upstream	NM_138426	GLCCI1	glucocorticoid-induced transcript 1 protein	-4.37455	-2.12914	4.37455	down	chr7	+	8008422	8128709
ENST00000451066	AC009473.1	-4.45925	-2.1568	4.45925	down	Ensembl	692	chr7	-	7989483	7990340	upstream	NM_138426	GLCCI1	glucocorticoid-induced transcript 1 protein	-4.37455	-2.12914	4.37455	down	chr7	+	8008422	8128709
ENST00000399411	AC006465.4	24.5207	4.61593	24.5207	up	Ensembl	1150	chr7	-	7948930	7950080	upstream	NM_138426	GLCCI1	glucocorticoid-induced transcript 1 protein	-4.37455	-2.12914	4.37455	down	chr7	+	8008422	8128709
ENST00000500703	AC012170.2	2.37858	1.2501	2.37858	up	Ensembl	3624	chr15	+	50655997	50660476	upstream	NM_003645	SLC27A2	very long-chain acyl-CoA synthetase isoform 1	-2.32266	-1.21578	2.32266	down	chr15	+	50474392	50528589
NR_024490	LOC100129387	2.11404	1.08	2.11404	up	RefSeq_NR	4139	chr15	+	50646370	50650501	upstream	NM_003645	SLC27A2	very long-chain acyl-CoA synthetase isoform 1	-2.32266	-1.21578	2.32266	down	chr15	+	50474392	50528589
chr10:44001669-44017744-	lincRNA-HNRNPF	-2.55255	-1.35194	2.55255	down	lincRNA	16076	chr10	-	44001669	44017744	downstream	NM_001098206	HNRNPF	heterogeneous nuclear ribonucleoprotein F	2.11925	1.08355	2.11925	up	chr10	-	43881064	43903299
chr2:68206296-68223571-	lincRNA-ETAA1-2	-2.64421	-1.40283	2.64421	down	lincRNA	17276	chr2	-	68206296	68223571	upstream	NM_000945	PPP3R1	calcineurin subunit B type 1	3.98994	1.99637	3.98994	up	chr2	-	68405988	68479651
BC030711	lincRNA-PROKR1	-2.89714	-1.53463	2.89714	down	lincRNA	1708	chr2	+	68756772	68857856	upstream	NM_000945	PPP3R1	calcineurin subunit B type 1	3.98994	1.99637	3.98994	up	chr2	-	68405988	68479651
chr2:68206296-68223571+	lincRNA-C1D-1	-2.00067	-1.00048	2.00067	down	lincRNA	17276	chr2	+	68206296	68223571	downstream	NM_000945	PPP3R1	calcineurin subunit B type 1	3.98994	1.99637	3.98994	up	chr2	-	68405988	68479651
CN288152	lincRNA-SPINK5	-2.15001	-1.10434	2.15001	down	lincRNA	741	chr5	+	147329207	147329947	downstream	NM_001127699	SPINK5	serine protease inhibitor Kazal-type 5 isoform c	-10.8736	-3.44276	10.8736	down	chr5	+	147443534	147504503
DA453447	lincRNA-CLDN18	-2.04658	-1.03322	2.04658	down	lincRNA	557	chr3	-	137766396	137766951	upstream	NM_178130	TXNDC6	thioredoxin domain-containing protein 6	-28.9733	-4.85665	28.9733	down	chr3	-	137980278	138048728
ENST00000464337	AC008155.2	-2.58689	-1.37122	2.58689	down	Ensembl	397	chr7	-	137982832	137983229	upstream	NM_015905	TRIM24	transcription intermediary factor 1-alpha	2.39588	1.26056	2.39588	up	chr7	+	138145078	138270332
AK054728	lincRNA-CALCA	-2.27314	-1.18469	2.27314	down	lincRNA	2258	chr11	+	14926542	15100182	overlap	NM_001741	CALCA	calcitonin CT preproprotein	-2.3697	-1.2447	2.3697	down	chr11	-	14990047	14993832
ENST00000419357	C6orf214	-2.37913	-1.25043	2.37913	down	Ensembl	264	chr6	-	30766430	30798436	downstream	NM_001025091	ABCF1	ATP-binding cassette sub-family F member 1	3.54136	1.8243	3.54136	up	chr6	+	30539169	30559309
AL133087	lincRNA-PGAP1	-3.50238	-1.80834	3.50238	down	lincRNA	2825	chr2	-	197831742	197987457	downstream	NM_001080539	CCDC150	coiled-coil domain-containing protein 150	4.36162	2.12486	4.36162	up	chr2	+	197504355	197597530
chr17:72383376-72409968-	lincRNA-GPR142	-3.23104	-1.692	3.23104	down	lincRNA	26593	chr17	-	72383376	72409968	downstream	NM_153209	KIF19	kinesin-like protein KIF19	-44.9329	-5.4897	44.9329	down	chr17	+	72322350	72351959
DN920247	lincRNA-SCARB2	5.11447	2.35458	5.11447	up	lincRNA	527	chr4	-	77102106	77155656	upstream	NM_003943	STBD1	starch-binding domain-containing protein 1	-3.59067	-1.84425	3.59067	down	chr4	+	77227676	77232283
AK124936	lincRNA-FAM47E	-81.9836	-6.35726	81.9836	down	lincRNA	1624	chr4	+	77135192	77204933	downstream	NM_003943	STBD1	starch-binding domain-containing protein 1	-3.59067	-1.84425	3.59067	down	chr4	+	77227676	77232283
AW387651	lincRNA-TFE3	-2.2146	-1.14705	2.2146	down	lincRNA	232	chrX	-	48903267	49031062	downstream	NM_181532	ERAS	GTPase ERas precursor	-2.17822	-1.12315	2.17822	down	chrX	+	48687282	48688548
ENST00000513381	RP11-834C11.5	2.79687	1.48382	2.79687	up	Ensembl	499	chr12	-	54478915	54519614	upstream	NM_016057	COPZ1	coatomer subunit zeta-1	2.13865	1.0967	2.13865	up	chr12	+	54718910	54745633
NR_026655	FLJ12825	-2.3437	-1.22879	2.3437	down	RefSeq_NR	3942	chr12	+	54452037	54516018	downstream	NM_016057	COPZ1	coatomer subunit zeta-1	2.13865	1.0967	2.13865	up	chr12	+	54718910	54745633
ENST00000504210	RP11-834C11.8	-5.58926	-2.48266	5.58926	down	Ensembl	403	chr12	+	54556922	54562379	downstream	NM_016057	COPZ1	coatomer subunit zeta-1	2.13865	1.0967	2.13865	up	chr12	+	54718910	54745633
NR_026656	LOC400043	3.9435	1.97948	3.9435	up	RefSeq_NR	1411	chr12	+	54519854	54526619	downstream	NM_016057	COPZ1	coatomer subunit zeta-1	2.13865	1.0967	2.13865	up	chr12	+	54718910	54745633
AK022887		4.22161	2.07779	4.22161	up	RNAdb	2629	chr12	+	54513394	54516023	downstream	NM_016057	COPZ1	coatomer subunit zeta-1	2.13865	1.0967	2.13865	up	chr12	+	54718910	54745633
exon94-	lincRNA-DMBX1	2.50663	1.32575	2.50663	up	lincRNA	161	chr1	-	46996996	46997156	downstream	NM_147192	DMBX1	diencephalon/mesencephalon homeobox protein 1	2.12507	1.08751	2.12507	up	chr1	+	46972667	46979886
exon91+	lincRNA-KNCN	-2.18488	-1.12755	2.18488	down	lincRNA	175	chr1	+	46989750	46989924	upstream	NM_147192	DMBX1	diencephalon/mesencephalon homeobox protein 1	2.12507	1.08751	2.12507	up	chr1	+	46972667	46979886
exon90+	lincRNA-KNCN	-2.88201	-1.52708	2.88201	down	lincRNA	643	chr1	+	46985867	46986509	upstream	NM_147192	DMBX1	diencephalon/mesencephalon homeobox protein 1	2.12507	1.08751	2.12507	up	chr1	+	46972667	46979886
BQ302800	lincRNA-PRSS38	6.34033	2.66456	6.34033	up	lincRNA	740	chr1	-	227890324	228285713	overlap	NM_001024226	ARF1	ADP-ribosylation factor 1	2.37482	1.24782	2.37482	up	chr1	+	228270360	228286913
BX102989	lincRNA-SPATA19-2	9.83884	3.29849	9.83884	up	lincRNA	350	chr11	-	133778893	133781850	upstream	NM_015261	NCAPD3	condensin-2 complex subunit D3	9.96646	3.31708	9.96646	up	chr11	-	134022336	134094426
AX747492	lincRNA-HFE2	2.0936	1.06599	2.0936	up	lincRNA	4510	chr1	+	145209144	146424095	overlap	NM_006472	TXNIP	thioredoxin-interacting protein	-2.74188	-1.45516	2.74188	down	chr1	+	145438461	145442628
ENST00000439110	PTMAP6	2.64796	1.40488	2.64796	up	Ensembl	327	chr20	-	55275892	55276570	downstream	NM_001013646	C20orf107	hypothetical protein LOC388799 precursor	-3.84911	-1.94452	3.84911	down	chr20	+	55108301	55111576
AK091999		4.18784	2.06621	4.18784	up	misc_RNA	2613	chr1	+	219444115	219446727	upstream	NM_138794	LYPLAL1	lysophospholipase-like protein 1	2.54642	1.34847	2.54642	up	chr1	+	219347191	219386207
chr14:76020622-76030872+	lincRNA-FLVCR2	-2.04955	-1.03531	2.04955	down	lincRNA	10251	chr14	+	76020622	76030872	upstream	NM_006399	BATF	basic leucine zipper transcriptional factor	-2.5878	-1.37173	2.5878	down	chr14	+	75988783	76013334
ENST00000442418	RP11-86H7.1	-2.68842	-1.42676	2.68842	down	Ensembl	748	chr1	-	95104016	95285652	downstream	NM_001122674	ABCD3	ATP-binding cassette sub-family D member 3	-2.89689	-1.5345	2.89689	down	chr1	+	94883932	94944260
chr2:232219356-232231081-	lincRNA-ARMC9	-3.11755	-1.64041	3.11755	down	lincRNA	11726	chr2	-	232219356	232231081	upstream	NM_145236	B3GNT7	UDP-GlcNAc:betaGal	-2.37677	-1.249	2.37677	down	chr2	+	232260334	232265875
BU588258	lincRNA-SUB1-2	4.52133	2.17675	4.52133	up	lincRNA	496	chr5	+	32535294	32535764	upstream	NM_016107	ZFR	zinc finger RNA-binding protein	3.54249	1.82476	3.54249	up	chr5	-	32354455	32444844
chrX:118607438-118617354+	lincRNA-CXorf56-3	2.73277	1.45036	2.73277	up	lincRNA	9917	chrX	+	118607438	118617354	upstream	NM_006667	PGRMC1	membrane-associated progesterone receptor	2.45469	1.29554	2.45469	up	chrX	+	118370210	118378429
chrX:118619272-118629135-	lincRNA-SLC25A5-1	2.26827	1.18159	2.26827	up	lincRNA	9864	chrX	-	118619272	118629135	downstream	NM_006667	PGRMC1	membrane-associated progesterone receptor	2.45469	1.29554	2.45469	up	chrX	+	118370210	118378429
DB317657	lincRNA-RPS6KC1-2	-2.20433	-1.14034	2.20433	down	lincRNA	543	chr1	-	213462943	213463487	downstream	NM_001136138	RPS6KC1	ribosomal protein S6 kinase delta-1 isoform b	4.86975	2.28385	4.86975	up	chr1	+	213224587	213446808
AI247420	lincRNA-RPS6KC1-1	-2.14193	-1.09891	2.14193	down	lincRNA	408	chr1	-	213719730	213967930	downstream	NM_001136138	RPS6KC1	ribosomal protein S6 kinase delta-1 isoform b	4.86975	2.28385	4.86975	up	chr1	+	213224587	213446808
BC034819		2.28179	1.19017	2.28179	up	NRED	2882	chr4	+	153457444	153460292	downstream	NM_001025593	ARFIP1	arfaptin-1 isoform 2	3.67602	1.87814	3.67602	up	chr4	+	153701111	153833063
CN413083	lincRNA-UFC1	4.63202	2.21164	4.63202	up	lincRNA	687	chr1	+	161106389	161107075	downstream	NM_032174	TOMM40L	mitochondrial import receptor subunit TOM40B	2.96944	1.57019	2.96944	up	chr1	+	161195832	161200407
AF191495	lincRNA-F11R	4.10745	2.03824	4.10745	up	lincRNA	2187	chr1	-	160967605	161008711	upstream	NM_032174	TOMM40L	mitochondrial import receptor subunit TOM40B	2.96944	1.57019	2.96944	up	chr1	+	161195832	161200407
BC043232	lincRNA-ZSCAN5A	-3.28586	-1.71627	3.28586	down	lincRNA	2472	chr19	-	56732680	56879752	upstream	NM_001159861	ZNF583	zinc finger protein 583	-2.16912	-1.11711	2.16912	down	chr19	+	56915717	56936400
AF289584	lincRNA-NKD1	-4.22266	-2.07815	4.22266	down	lincRNA	2142	chr16	+	50369047	50668127	upstream	NM_001040284	PAPD5	PAP-associated domain-containing protein 5	2.40663	1.26702	2.40663	up	chr16	+	50186828	50269219
ENST00000475886	RP11-129K20.2	-2.31398	-1.21037	2.31398	down	Ensembl	758	chr3	+	62936104	63109888	upstream	NM_183393	CADPS	calcium-dependent secretion activator 1 isoform	-3.78851	-1.92163	3.78851	down	chr3	-	62384020	62861064
BX101700	lincRNA-TACR1-1	3.77083	1.91488	3.77083	up	lincRNA	720	chr2	-	75555040	75555760	upstream	NM_001135032	FAM176A	family with sequence similarity 176, member A	-2.32607	-1.2179	2.32607	down	chr2	-	75719443	75788092
ENST00000502790	RP11-692D12.1	-2.42015	-1.2751	2.42015	down	Ensembl	685	chr4	+	74124925	74183670	downstream	NM_001133	AFM	afamin precursor	-2.13566	-1.09469	2.13566	down	chr4	+	74347461	74369718
ENST00000440088	AC090421.1	-2.76813	-1.46891	2.76813	down	Ensembl	2029	chr7	-	77286976	77325582	downstream	NM_002835	PTPN12	tyrosine-protein phosphatase non-receptor type	7.59625	2.92529	7.59625	up	chr7	+	77166772	77269388
ENST00000444862	AP005273.1	-2.93067	-1.55123	2.93067	down	Ensembl	522	chr11	+	64268324	64272858	upstream	NM_031471	FERMT3	fermitin family homolog 3 short form	-3.43628	-1.78085	3.43628	down	chr11	+	63974151	63991363
chrX:38716431-38792681-	lincRNA-MID1IP1-9	-3.20884	-1.68205	3.20884	down	lincRNA	76251	chrX	-	38716431	38792681	downstream	NM_004615	TSPAN7	tetraspanin-7	-2.19868	-1.13664	2.19868	down	chrX	+	38420730	38548172
uc003cqw.1	AK096853	-5.35218	-2.42013	5.35218	down	UCSC_knowngene	2353	chr3	+	47205986	47285546	upstream	NM_144716	CCDC12	coiled-coil domain-containing protein 12	-2.23842	-1.16248	2.23842	down	chr3	-	46963219	47018270
chr4:25089927-25101952+	lincRNA-SEPSECS-1	-4.99774	-2.32128	4.99774	down	lincRNA	12026	chr4	+	25089927	25101952	downstream	NM_018323	PI4K2B	phosphatidylinositol 4-kinase type 2-beta	5.79967	2.53597	5.79967	up	chr4	+	25235652	25280831
BQ302800	lincRNA-PRSS38	6.34033	2.66456	6.34033	up	lincRNA	740	chr1	-	227890324	228285713	upstream	NM_000858	GUK1	guanylate kinase isoform b	2.67413	1.41907	2.67413	up	chr1	+	228327928	228336655
BC032831	lincRNA-DAAM1-1	-2.08853	-1.06249	2.08853	down	lincRNA	2557	chr14	-	59895739	59932059	upstream	NM_206857	RTN1	reticulon-1 isoform B	-6.02162	-2.59015	6.02162	down	chr14	-	60062693	60194431
uc001gco.2	BC032239	2.03347	1.02395	2.03347	up	UCSC_knowngene	1440	chr1	-	163274001	163291542	upstream	NM_145697	NUF2	kinetochore protein Nuf2	13.2477	3.72767	13.2477	up	chr1	+	163291722	163325553
DY655635	lincRNA-C16orf75-2	-2.69833	-1.43207	2.69833	down	lincRNA	379	chr16	-	11477618	11478868	downstream	NM_003745	SOCS1	suppressor of cytokine signaling 1	6.49843	2.70009	6.49843	up	chr16	-	11348273	11350039
DB297898	lincRNA-ANKRD34C-1	-2.47753	-1.3089	2.47753	down	lincRNA	528	chr15	+	79518905	79519430	downstream	NM_001146341	ANKRD34C	ankyrin repeat domain-containing protein 34C	-4.23823	-2.08346	4.23823	down	chr15	+	79575145	79590581
NR_024279	FLJ37453	-3.13715	-1.64946	3.13715	down	RefSeq_NR	2732	chr1	-	16160709	16174642	overlap	NM_015001	SPEN	msx2-interacting protein	-2.16212	-1.11245	2.16212	down	chr1	+	16174358	16266950
DA453447	lincRNA-CLDN18	-2.04658	-1.03322	2.04658	down	lincRNA	557	chr3	-	137766396	137766951	downstream	NM_001002026	CLDN18	claudin-18 isoform 2	4.2267	2.07953	4.2267	up	chr3	+	137717657	137752494
AX747237	lincRNA-KIFC3	2.27272	1.18442	2.27272	up	lincRNA	3159	chr16	-	57792130	57896733	downstream	NM_153837	GPR114	probable G-protein coupled receptor 114	2.14331	1.09984	2.14331	up	chr16	+	57576600	57611100
chr4:158983666-159005030+	lincRNA-FAM198B-1	2.38364	1.25316	2.38364	up	lincRNA	21365	chr4	+	158983666	159005030	downstream	NM_018342	TMEM144	transmembrane protein 144	5.32501	2.41278	5.32501	up	chr4	+	159131400	159176439
chr4:158983666-159005030-	lincRNA-GRIA2-1	-2.47334	-1.30646	2.47334	down	lincRNA	21365	chr4	-	158983666	159005030	upstream	NM_018342	TMEM144	transmembrane protein 144	5.32501	2.41278	5.32501	up	chr4	+	159131400	159176439
chr1:149731347-149744257-	lincRNA-PPIAL4B-1	-5.38289	-2.42838	5.38289	down	lincRNA	12911	chr1	-	149731347	149744257	upstream	NM_003517	HIST2H2AC	histone H2A type 2-C	4.89985	2.29274	4.89985	up	chr1	+	149858524	149858961
AK291502	lincRNA-HIST2H2BF	8.26226	3.04654	8.26226	up	lincRNA	1686	chr1	+	149369293	149763584	downstream	NM_003517	HIST2H2AC	histone H2A type 2-C	4.89985	2.29274	4.89985	up	chr1	+	149858524	149858961
NR_033182	LOC100130872-SPON2	-2.34889	-1.23198	2.34889	down	RefSeq_NR	729	chr4	-	1165639	1202634	upstream	NM_001328	CTBP1	C-terminal-binding protein 1 isoform 1	-3.15671	-1.65842	3.15671	down	chr4	-	1205227	1242908
AK054588		2.65771	1.41019	2.65771	up	misc_RNA	1826	chr1	-	118382256	118384393	upstream	NM_006784	WDR3	WD repeat-containing protein 3	2.0496	1.03534	2.0496	up	chr1	+	118472371	118503049
uc001rhc.2	BC041929	-4.18369	-2.06478	4.18369	down	UCSC_knowngene	1355	chr12	+	26287896	26334216	downstream	NM_001135823	SSPN	sarcospan isoform 2	4.27389	2.09555	4.27389	up	chr12	+	26348268	26387708
BC017416		11.7211	3.55103	11.7211	up	misc_RNA	1439	chr12	-	68820110	68821517	upstream	NM_001010942	RAP1B	ras-related protein Rap-1b precursor	3.83358	1.93869	3.83358	up	chr12	+	69004651	69054374
uc003klp.2	FIS	-4.38836	-2.13368	4.38836	down	UCSC_knowngene	2049	chr5	+	95187935	95195834	upstream	NM_173362	RFESD	Rieske domain-containing protein isoform 2	-2.70775	-1.43709	2.70775	down	chr5	+	94982582	94992849
ENST00000503091	AC008592.5	2.02386	1.01711	2.02386	up	Ensembl	665	chr5	+	95197489	95210223	upstream	NM_173362	RFESD	Rieske domain-containing protein isoform 2	-2.70775	-1.43709	2.70775	down	chr5	+	94982582	94992849
NR_026936	C5orf27	-5.16779	-2.36955	5.16779	down	RefSeq_NR	1931	chr5	+	95187935	95195834	upstream	NM_173362	RFESD	Rieske domain-containing protein isoform 2	-2.70775	-1.43709	2.70775	down	chr5	+	94982582	94992849
AI948514	lincRNA-EML4	-2.02002	-1.01437	2.02002	down	lincRNA	444	chr2	-	42565867	42566311	downstream	NM_019063	EML4	echinoderm microtubule-associated protein-like 4	-2.60306	-1.38021	2.60306	down	chr2	+	42396489	42559688
BM956062	lincRNA-PGS1	5.70521	2.51228	5.70521	up	lincRNA	174	chr17	+	76360558	76360732	upstream	NM_003258	TK1	thymidine kinase, cytosolic	7.34639	2.87704	7.34639	up	chr17	-	76170159	76183285
AK021484	lincRNA-SYNPO2	10.1905	3.34915	10.1905	up	lincRNA	3422	chr4	+	119672345	119956974	upstream	NM_020961	METTL14	methyltransferase-like protein 14	2.62671	1.39325	2.62671	up	chr4	+	119606573	119632077
ENST00000507589	AC025370.2	-2.38338	-1.25301	2.38338	down	Ensembl	2742	chr8	+	104255772	104258560	downstream	NM_138455	CTHRC1	collagen triple helix repeat-containing protein	9.54235	3.25434	9.54235	up	chr8	+	104383785	104395217
AK126983		-2.44671	-1.29084	2.44671	down	misc_RNA	5637	chr22	-	24243618	24249255	downstream	NM_003073	SMARCB1	SWI/SNF-related matrix-associated	2.81391	1.49258	2.81391	up	chr22	+	24129149	24176705
ENST00000439492	AP000350.6	2.67961	1.42202	2.67961	up	Ensembl	1763	chr22	+	24269086	24271761	upstream	NM_003073	SMARCB1	SWI/SNF-related matrix-associated	2.81391	1.49258	2.81391	up	chr22	+	24129149	24176705
ENST00000432147	RP4-735C1.5	6.9127	2.78925	6.9127	up	Ensembl	355	chr1	-	110353265	110353620	downstream	NM_000851	GSTM5	glutathione S-transferase Mu 5	-23.356	-4.54572	23.356	down	chr1	+	110254863	110260890
ENST00000452381	AC064834.2	-3.05665	-1.61195	3.05665	down	Ensembl	850	chr2	+	196397758	196403405	downstream	NM_020342	SLC39A10	zinc transporter ZIP10 precursor	6.90151	2.78691	6.90151	up	chr2	+	196521851	196602426
DA223008	lincRNA-PARP11-3	-3.42893	-1.77776	3.42893	down	lincRNA	495	chr12	-	4361900	4384231	upstream	NM_006479	RAD51AP1	RAD51-associated protein 1 isoform b	21.8574	4.45005	21.8574	up	chr12	+	4647949	4669213
uc001gco.2	BC032239	2.03347	1.02395	2.03347	up	UCSC_knowngene	1440	chr1	-	163274001	163291542	downstream	NM_003617	RGS5	regulator of G-protein signaling 5 isoform 1	-2.17053	-1.11805	2.17053	down	chr1	-	163112088	163172963
AK090977		-2.30543	-1.20504	2.30543	down	misc_RNA	2052	chr3	+	152374433	152376485	upstream	NM_207297	MBNL1	muscleblind-like protein 1 isoform g	4.63708	2.21322	4.63708	up	chr3	+	152017193	152183569
ENST00000427151	AC129929.5	2.03219	1.02304	2.03219	up	Ensembl	1171	chr11	-	2349978	2399219	downstream	NM_139022	TSPAN32	tetraspanin-32	-8.55219	-3.09629	8.55219	down	chr11	+	2323242	2339430
chr11:2448349-2458849-	lincRNA-TRPM5	-2.20886	-1.1433	2.20886	down	lincRNA	10501	chr11	-	2448349	2458849	downstream	NM_139022	TSPAN32	tetraspanin-32	-8.55219	-3.09629	8.55219	down	chr11	+	2323242	2339430
DA922283	lincRNA-TH	4.68973	2.2295	4.68973	up	lincRNA	568	chr11	-	2229882	2230451	upstream	NM_139022	TSPAN32	tetraspanin-32	-8.55219	-3.09629	8.55219	down	chr11	+	2323242	2339430
ENST00000447571	AC079807.4	12.1281	3.60028	12.1281	up	Ensembl	1808	chr2	-	48168834	48468122	upstream	NM_001135629	KLRAQ1	KLRAQ motif-containing protein 1 isoform 1	2.36213	1.24009	2.36213	up	chr2	+	48667907	48742531
BM728564	lincRNA-HHAT	-2.66878	-1.41618	2.66878	down	lincRNA	568	chr1	+	210425878	210426445	upstream	NM_001146262	SYT14	synaptotagmin-14 isoform 3	-3.06232	-1.61463	3.06232	down	chr1	+	210111537	210337633
uc010ssu.1	BC043551	-2.45949	-1.29836	2.45949	down	UCSC_knowngene	724	chr12	-	65938018	65951091	downstream	NM_001167614	LEMD3	inner nuclear membrane protein Man1 isoform 2	3.96233	1.98635	3.96233	up	chr12	+	65563350	65642141
NR_033182	LOC100130872-SPON2	-2.34889	-1.23198	2.34889	down	RefSeq_NR	729	chr4	-	1165639	1202634	downstream	NM_001004356	FGFRL1	fibroblast growth factor receptor-like 1	5.43109	2.44124	5.43109	up	chr4	+	1005609	1020686
chr7:73684091-73687309-	lincRNA-RFC2	-2.20092	-1.13811	2.20092	down	lincRNA	3219	chr7	-	73684091	73687309	downstream	NM_001081752	ELN	elastin isoform b precursor	-2.38254	-1.2525	2.38254	down	chr7	+	73442426	73484236
AK074818		-2.21956	-1.15027	2.21956	down	misc_RNA	2352	chr5	-	173137442	173146695	downstream	NM_001159651	BOD1	biorientation of chromosomes in cell division	2.04421	1.03154	2.04421	up	chr5	-	173034147	173043666
NR_027108	LOC285593	2.05843	1.04154	2.05843	up	RefSeq_NR	1781	chr5	+	173006645	173012074	downstream	NM_001159651	BOD1	biorientation of chromosomes in cell division	2.04421	1.03154	2.04421	up	chr5	-	173034147	173043666
AX747492	lincRNA-HFE2	2.0936	1.06599	2.0936	up	lincRNA	4510	chr1	+	145209144	146424095	overlap	NM_001039703	NBPF10	neuroblastoma breakpoint family member 10	2.29211	1.19668	2.29211	up	chr1	+	145293370	145368684
DA955413	lincRNA-FAM65A-1	-17.2583	-4.10922	17.2583	down	lincRNA	562	chr16	+	67552113	67552675	downstream	NM_032140	C16orf48	hypothetical protein LOC84080	-6.82359	-2.77053	6.82359	down	chr16	-	67696849	67700628
BG210561	lincRNA-AGRP-2	-3.12553	-1.6441	3.12553	down	lincRNA	697	chr16	-	67551608	67552290	upstream	NM_032140	C16orf48	hypothetical protein LOC84080	-6.82359	-2.77053	6.82359	down	chr16	-	67696849	67700628
CN315150	lincRNA-FAM65A-3	-2.83035	-1.50098	2.83035	down	lincRNA	705	chr16	+	67536554	67537247	downstream	NM_032140	C16orf48	hypothetical protein LOC84080	-6.82359	-2.77053	6.82359	down	chr16	-	67696849	67700628
ENST00000441363	RP11-398K22.12	-2.02104	-1.0151	2.02104	down	Ensembl	2403	chr6	+	73973081	74011124	downstream	NM_138441	MB21D1	protein MB21D1	3.7416	1.90366	3.7416	up	chr6	-	74134855	74162043
CV326062	lincRNA-COL12A1	-2.20003	-1.13752	2.20003	down	lincRNA	435	chr6	+	74227860	74718631	upstream	NM_138441	MB21D1	protein MB21D1	3.7416	1.90366	3.7416	up	chr6	-	74134855	74162043
AI218855	lincRNA-RPS14-2	-5.7829	-2.53179	5.7829	down	lincRNA	269	chr5	-	149855120	149864849	downstream	NM_001804	CDX1	homeobox protein CDX-1	-7.40237	-2.88799	7.40237	down	chr5	+	149546343	149564121
ENST00000418851	AC008280.1	-2.22853	-1.1561	2.22853	down	Ensembl	412	chr2	-	54256688	54257819	downstream	NM_001008708	CHAC2	cation transport regulator-like protein 2	2.84353	1.50768	2.84353	up	chr2	+	53994928	54002287
CR604878		2.34499	1.22958	2.34499	up	NRED	1220	chr4	-	56814122	56815341	overlap	NM_025009	CEP135	centrosomal protein of 135 kDa	7.30281	2.86845	7.30281	up	chr4	+	56815036	56899527
EB386665	lincRNA-SLN	6.35931	2.66887	6.35931	up	lincRNA	821	chr11	-	107644071	107644892	upstream	NM_003478	CUL5	cullin-5	2.70888	1.4377	2.70888	up	chr11	+	107879407	107978488
AI553950	lincRNA-INSL6	5.88501	2.55704	5.88501	up	lincRNA	449	chr9	+	5131978	5164252	upstream	NM_005772	RCL1	RNA 3'-terminal phosphate cyclase-like protein	6.22323	2.63766	6.22323	up	chr9	+	4792833	4861064
BX098775	lincRNA-JAK2-1	4.02705	2.00972	4.02705	up	lincRNA	478	chr9	-	5132032	5165921	downstream	NM_005772	RCL1	RNA 3'-terminal phosphate cyclase-like protein	6.22323	2.63766	6.22323	up	chr9	+	4792833	4861064
exon847+	lincRNA-ZW10	-2.70448	-1.43535	2.70448	down	lincRNA	440	chr11	+	113591786	113592225	downstream	NM_213621	HTR3A	5-hydroxytryptamine receptor 3A isoform a	-5.32218	-2.41202	5.32218	down	chr11	+	113845796	113861034
BM782281	lincRNA-DLGAP1-2	-7.66348	-2.938	7.66348	down	lincRNA	472	chr18	+	3466247	3478973	upstream	NM_001144945	MYL12B	myosin regulatory light chain 12B	2.37968	1.25077	2.37968	up	chr18	+	3262716	3278282
AW086055	lincRNA-PRRC2C	2.52497	1.33627	2.52497	up	lincRNA	378	chr1	-	171562278	171562866	upstream	NM_001136127	DNM3	dynamin-3 isoform b	2.81964	1.49551	2.81964	up	chr1	+	171810620	172381857
ENST00000498507	RP4-612B18.1	-3.25887	-1.70437	3.25887	down	Ensembl	350	chr1	-	171793749	171794099	upstream	NM_001136127	DNM3	dynamin-3 isoform b	2.81964	1.49551	2.81964	up	chr1	+	171810620	172381857
NR_021491	FLJ42709	-2.42799	-1.27976	2.42799	down	RefSeq_NR	1184	chr5	-	92746501	92916953	upstream	NM_005654	NR2F1	COUP transcription factor 1	-27.0507	-4.7576	27.0507	down	chr5	+	92919042	92929786
uc003kkf.2	FLJ42709	-4.55974	-2.18895	4.55974	down	UCSC_knowngene	2792	chr5	-	92745064	92917003	upstream	NM_005654	NR2F1	COUP transcription factor 1	-27.0507	-4.7576	27.0507	down	chr5	+	92919042	92929786
AK297077	lincRNA-FYB	2.04723	1.03367	2.04723	up	lincRNA	2747	chr5	-	39107403	39270759	upstream	NM_001343	DAB2	disabled homolog 2	2.50234	1.32328	2.50234	up	chr5	-	39371779	39425335
NR_027697	FLJ39653	2.3315	1.22126	2.3315	up	RefSeq_NR	2496	chr4	+	16228285	16259810	upstream	NM_001145848	PROM1	prominin-1 isoform 2	-45.2644	-5.5003	45.2644	down	chr4	-	15969848	16085623
NR_027696	FLJ39653	6.10172	2.60922	6.10172	up	RefSeq_NR	2547	chr4	+	16228285	16259810	upstream	NM_001145848	PROM1	prominin-1 isoform 2	-45.2644	-5.5003	45.2644	down	chr4	-	15969848	16085623
uc003igh.1	AK093416	-2.70724	-1.43682	2.70724	down	UCSC_knowngene	2012	chr4	+	129349224	129440549	downstream	NM_199320	PHF17	protein Jade-1 long isoform	-2.52712	-1.33749	2.52712	down	chr4	+	129730778	129796379
chr4:3297502-3310352-	lincRNA-C4orf44	-2.02512	-1.01801	2.02512	down	lincRNA	12851	chr4	-	3297502	3310352	upstream	NM_001164673	DOK7	protein Dok-7 isoform 2	-6.31193	-2.65808	6.31193	down	chr4	+	3465032	3496209
DA479771	lincRNA-C1orf185	2.08041	1.05687	2.08041	up	lincRNA	564	chr1	+	51443196	51524574	upstream	NM_001262	CDKN2C	cyclin-dependent kinase 4 inhibitor C	2.29529	1.19868	2.29529	up	chr1	+	51434366	51440306
chr7:117584264-117586960+	lincRNA-NAA38	2.87138	1.52175	2.87138	up	lincRNA	2697	chr7	+	117584264	117586960	upstream	NM_000492	CFTR	cystic fibrosis transmembrane conductance	-3.3429	-1.7411	3.3429	down	chr7	+	117120016	117308718
ENST00000439492	AP000350.6	2.67961	1.42202	2.67961	up	Ensembl	1763	chr22	+	24269086	24271761	upstream	NM_002415	MIF	macrophage migration inhibitory factor	3.403	1.76681	3.403	up	chr22	+	24236564	24237409
AK126983		-2.44671	-1.29084	2.44671	down	misc_RNA	5637	chr22	-	24243618	24249255	downstream	NM_002415	MIF	macrophage migration inhibitory factor	3.403	1.76681	3.403	up	chr22	+	24236564	24237409
uc002tkz.1	CR601322	-4.02896	-2.01041	4.02896	down	UCSC_knowngene	844	chr2	+	114737145	114764879	upstream	NM_025181	SLC35F5	solute carrier family 35 member F5	2.22237	1.1521	2.22237	up	chr2	-	114471932	114514400
DB342819	lincRNA-GOLGA4	-8.89726	-3.15336	8.89726	down	lincRNA	579	chr3	-	37432860	37433435	upstream	NM_178342	C3orf35	AP20 region protein 1 isoform E	-2.66706	-1.41525	2.66706	down	chr3	+	37440967	37459865
AJ493605	lincRNA-C3orf35	-3.47296	-1.79617	3.47296	down	lincRNA	981	chr3	+	37427759	37459039	overlap	NM_178342	C3orf35	AP20 region protein 1 isoform E	-2.66706	-1.41525	2.66706	down	chr3	+	37440967	37459865
AW387651	lincRNA-TFE3	-2.2146	-1.14705	2.2146	down	lincRNA	232	chrX	-	48903267	49031062	downstream	NM_006044	HDAC6	histone deacetylase 6	2.673	1.41846	2.673	up	chrX	+	48660486	48683380
uc003wst.1	LOC157627	-2.86674	-1.51941	2.86674	down	UCSC_knowngene	869	chr8	-	9757573	9758710	upstream	NM_001135670	MSRA	peptide methionine sulfoxide reductase isoform	-2.39877	-1.26229	2.39877	down	chr8	+	9911829	10286401
AK090904		2.2486	1.16903	2.2486	up	RNAdb	2547	chr4	+	128759331	128761879	downstream	NM_178043	LARP1B	la-related protein 1B isoform 2	3.60701	1.8508	3.60701	up	chr4	+	128982502	129043507
uc003ifn.2	AK090904	5.32488	2.41275	5.32488	up	UCSC_knowngene	2962	chr4	+	128758921	128761883	downstream	NM_178043	LARP1B	la-related protein 1B isoform 2	3.60701	1.8508	3.60701	up	chr4	+	128982502	129043507
ENST00000512349	CTD-2313F11.2	-2.05774	-1.04106	2.05774	down	Ensembl	591	chr5	+	54350255	54350968	downstream	NM_001170402	CDC20B	cell division cycle protein 20 homolog B isoform	-9.8986	-3.30723	9.8986	down	chr5	-	54408798	54469005
ENST00000440088	AC090421.1	-2.76813	-1.46891	2.76813	down	Ensembl	2029	chr7	-	77286976	77325582	downstream	NM_001131008	PTPN12	tyrosine-protein phosphatase non-receptor type	5.14287	2.36257	5.14287	up	chr7	+	77167351	77269388
ENST00000444862	AP005273.1	-2.93067	-1.55123	2.93067	down	Ensembl	522	chr11	+	64268324	64272858	upstream	NM_057092	FKBP2	peptidyl-prolyl cis-trans isomerase FKBP2	-4.81517	-2.26759	4.81517	down	chr11	+	64009587	64011607
ENST00000340424	RP4-673D20.1	-2.89794	-1.53503	2.89794	down	Ensembl	1216	chr20	-	1645928	1688846	upstream	NM_001040023	SIRPA	tyrosine-protein phosphatase non-receptor type	-3.07469	-1.62044	3.07469	down	chr20	+	1875825	1920540
ENST00000502790	RP11-692D12.1	-2.42015	-1.2751	2.42015	down	Ensembl	685	chr4	+	74124925	74183670	downstream	NM_000477	ALB	serum albumin preproprotein	-2.29964	-1.20141	2.29964	down	chr4	+	74269971	74287129
CR595169		6.22682	2.6385	6.22682	up	RNAdb	1493	chr1	-	173833394	173836186	upstream	NM_014857	RABGAP1L	rab GTPase-activating protein 1-like isoform A	-2.26005	-1.17635	2.26005	down	chr1	+	174128633	174927327
DB337946	lincRNA-ZBTB37-2	6.40161	2.67843	6.40161	up	lincRNA	538	chr1	-	173868049	173868587	upstream	NM_014857	RABGAP1L	rab GTPase-activating protein 1-like isoform A	-2.26005	-1.17635	2.26005	down	chr1	+	174128633	174927327
uc001gjk.2	GAS5	3.11184	1.63777	3.11184	up	UCSC_knowngene	1695	chr1	-	173833039	173837125	upstream	NM_014857	RABGAP1L	rab GTPase-activating protein 1-like isoform A	-2.26005	-1.17635	2.26005	down	chr1	+	174128633	174927327
ENST00000423943	RP11-48O20.4	-8.26514	-3.04704	8.26514	down	Ensembl	1113	chr1	+	159931013	159948851	upstream	NM_001135050	IGSF9	protein turtle homolog A isoform a	-2.44013	-1.28696	2.44013	down	chr1	-	159896828	159915386
uc003xjb.2	BC034319	7.31918	2.87168	7.31918	up	UCSC_knowngene	837	chr8	+	32785487	32902372	upstream	NM_001160008	NRG1	pro-neuregulin-1, membrane-bound isoform isoform	-27.9045	-4.80243	27.9045	down	chr8	+	32405727	32618507
AK299029	lincRNA-RAPGEF3	-4.06608	-2.02364	4.06608	down	lincRNA	2776	chr12	-	48131323	48164823	upstream	NM_001143843	TMEM106C	transmembrane protein 106C isoform b	2.93538	1.55355	2.93538	up	chr12	+	48357329	48362661
BC002759	lincRNA-SLC48A1	-2.29143	-1.19625	2.29143	down	lincRNA	1041	chr12	+	48165369	48176533	downstream	NM_001143843	TMEM106C	transmembrane protein 106C isoform b	2.93538	1.55355	2.93538	up	chr12	+	48357329	48362661
ENST00000423943	RP11-48O20.4	-8.26514	-3.04704	8.26514	down	Ensembl	1113	chr1	+	159931013	159948851	upstream	NM_003564	TAGLN2	transgelin-2	4.37538	2.12941	4.37538	up	chr1	-	159887902	159895284
AK056959	lincRNA-C4orf26	-2.9424	-1.55699	2.9424	down	lincRNA	1122	chr4	+	76439682	76472540	downstream	NM_003715	USO1	general vesicular transport factor p115	6.33312	2.66292	6.33312	up	chr4	+	76649828	76735366
AW387651	lincRNA-TFE3	-2.2146	-1.14705	2.2146	down	lincRNA	232	chrX	-	48903267	49031062	overlap	NM_001163322	CCDC120	coiled-coil domain-containing protein 120	-2.26912	-1.18214	2.26912	down	chrX	+	48916515	48927510
ENST00000503113	CTD-2245E15.3	-4.68422	-2.22781	4.68422	down	Ensembl	692	chr5	-	1544221	1551825	downstream	NM_001044	SLC6A3	sodium-dependent dopamine transporter	-4.9884	-2.31858	4.9884	down	chr5	-	1392904	1445543
ENST00000512572	CTD-3080P12.3	-4.3475	-2.12019	4.3475	down	Ensembl	1023	chr5	-	1175511	1178709	upstream	NM_001044	SLC6A3	sodium-dependent dopamine transporter	-4.9884	-2.31858	4.9884	down	chr5	-	1392904	1445543
AK021576		4.41447	2.14224	4.41447	up	NRED	2136	chr13	-	79890367	79924372	upstream	NM_001161407	NDFIP2	NEDD4 family-interacting protein 2 isoform 2	3.61133	1.85253	3.61133	up	chr13	+	80055258	80130212
uc003fux.1	AK128346	-3.09168	-1.62839	3.09168	down	UCSC_knowngene	2732	chr3	+	195426821	195438745	downstream	NM_001010938	TNK2	activated CDC42 kinase 1 isoform 2	4.22456	2.0788	4.22456	up	chr3	-	195590235	195622432
AK126698		-2.55517	-1.35342	2.55517	down	RNAdb	3826	chr3	+	195442310	195446106	downstream	NM_001010938	TNK2	activated CDC42 kinase 1 isoform 2	4.22456	2.0788	4.22456	up	chr3	-	195590235	195622432
AW364455	lincRNA-C16orf45	-2.6158	-1.38725	2.6158	down	lincRNA	535	chr16	+	15462374	16047393	overlap	NM_001128423	MPV17L	mpv17-like protein isoform 1	2.68365	1.4242	2.68365	up	chr16	+	15489610	15503543
ENST00000507589	AC025370.2	-2.38338	-1.25301	2.38338	down	Ensembl	2742	chr8	+	104255772	104258560	downstream	NM_001100117	RIMS2	regulating synaptic membrane exocytosis protein	-3.27172	-1.71005	3.27172	down	chr8	+	104512975	105266656
AW205788	lincRNA-ATP2A2	-3.47533	-1.79715	3.47533	down	lincRNA	347	chr12	+	110658505	110685736	upstream	NM_207435	C12orf76	hypothetical protein LOC400073	-3.82071	-1.93384	3.82071	down	chr12	-	110478982	110505500
chr10:60771715-60817064-	lincRNA-BICC1	-4.30734	-2.1068	4.30734	down	lincRNA	45350	chr10	-	60771715	60817064	downstream	NM_001080512	BICC1	protein bicaudal C homolog 1	2.23386	1.15954	2.23386	up	chr10	+	60272903	60588845
NR_026938	LOC221442	-3.19809	-1.67721	3.19809	down	RefSeq_NR	4585	chr6	+	41068772	41108567	downstream	NM_004828	NCR2	natural cytotoxicity triggering receptor 2	-2.37195	-1.24607	2.37195	down	chr6	+	41303527	41318625
ENST00000440194	RP11-328M4.2	6.7146	2.7473	6.7146	up	Ensembl	196	chr6	-	41462590	41513981	downstream	NM_004828	NCR2	natural cytotoxicity triggering receptor 2	-2.37195	-1.24607	2.37195	down	chr6	+	41303527	41318625
CR748637	lincRNA-SLC9A9	2.74599	1.45733	2.74599	up	lincRNA	361	chr3	+	142871098	143101003	upstream	NM_001080415	U2SURP	U2 snRNP-associated SURP motif-containing	7.65841	2.93704	7.65841	up	chr3	+	142720371	142779567
BC070168	lincRNA-TSPAN8	-140.358	-7.13297	140.358	down	lincRNA	1543	chr12	-	71518868	71835678	overlap	NM_004616	TSPAN8	tetraspanin-8	-141.498	-7.14464	141.498	down	chr12	-	71518876	71551779
AF052103		-2.31721	-1.21239	2.31721	down	NRED	1329	chr16	+	85399033	85400344	upstream	NM_198491	FAM92B	hypothetical protein LOC339145	-106.518	-6.73496	106.518	down	chr16	-	85131964	85146114
AL832093		-2.36628	-1.24262	2.36628	down	RNAdb	3338	chr16	-	85176297	85179607	downstream	NM_198491	FAM92B	hypothetical protein LOC339145	-106.518	-6.73496	106.518	down	chr16	-	85131964	85146114
uc010izt.2	AK307154	-2.50111	-1.32257	2.50111	down	UCSC_knowngene	1121	chr5	+	74907300	74966977	upstream	NM_000859	HMGCR	3-hydroxy-3-methylglutaryl-Coenzyme A reductase	3.34512	1.74206	3.34512	up	chr5	+	74632992	74657926
ENST00000506596	ANKDD1B	-33.845	-5.08087	33.845	down	Ensembl	1815	chr5	+	74907300	74967671	upstream	NM_000859	HMGCR	3-hydroxy-3-methylglutaryl-Coenzyme A reductase	3.34512	1.74206	3.34512	up	chr5	+	74632992	74657926
chrX:102236694-102253244-	lincRNA-RAB40AL-1	-2.54696	-1.34878	2.54696	down	lincRNA	16551	chrX	-	102236694	102253244	upstream	NM_018476	BEX1	protein BEX1	-5.45396	-2.4473	5.45396	down	chrX	-	102317580	102319168
uc001jef.2	LOC643650	9.66581	3.27289	9.66581	up	UCSC_knowngene	2876	chr10	-	47096454	47151400	downstream	NM_014696	GPRIN2	G protein-regulated inducer of neurite outgrowth	-25.4839	-4.67151	25.4839	down	chr10	+	46993545	47000568
AK091103		-3.01221	-1.59082	3.01221	down	misc_RNA	1924	chr4	-	174289045	174290964	downstream	NM_001130688	HMGB2	high mobility group protein B2	2.23853	1.16255	2.23853	up	chr4	-	174252526	174255509
chr1:39116163-39128263+	lincRNA-RRAGC-1	2.33378	1.22267	2.33378	up	lincRNA	12101	chr1	+	39116163	39128263	downstream	NM_030772	GJA9	gap junction alpha-9 protein	-4.04439	-2.01592	4.04439	down	chr1	-	39339738	39347298
BU663229	lincRNA-POU3F1-1	-3.57082	-1.83626	3.57082	down	lincRNA	555	chr1	-	39183439	39183984	upstream	NM_030772	GJA9	gap junction alpha-9 protein	-4.04439	-2.01592	4.04439	down	chr1	-	39339738	39347298
AY034104	lincRNA-TACR1-2	2.37485	1.24783	2.37485	up	lincRNA	306	chr2	+	75186481	75252012	downstream	NM_001058	TACR1	substance-P receptor isoform long	-9.85356	-3.30064	9.85356	down	chr2	-	75273589	75426645
BX101700	lincRNA-TACR1-1	3.77083	1.91488	3.77083	up	lincRNA	720	chr2	-	75555040	75555760	downstream	NM_001058	TACR1	substance-P receptor isoform long	-9.85356	-3.30064	9.85356	down	chr2	-	75273589	75426645
chr12:60208733-60258008-	lincRNA-SLC16A7-2	-2.43752	-1.28541	2.43752	down	lincRNA	49276	chr12	-	60208733	60258008	downstream	NM_004731	SLC16A7	monocarboxylate transporter 2	-3.80906	-1.92943	3.80906	down	chr12	+	60083125	60175408
chr12:60208733-60258008+	lincRNA-FAM19A2-1	2.69105	1.42817	2.69105	up	lincRNA	49276	chr12	+	60208733	60258008	upstream	NM_004731	SLC16A7	monocarboxylate transporter 2	-3.80906	-1.92943	3.80906	down	chr12	+	60083125	60175408
AK094629		10.1175	3.33878	10.1175	up	misc_RNA	2028	chr6	-	161411345	161413374	upstream	NM_020133	AGPAT4	1-acyl-sn-glycerol-3-phosphate acyltransferase	2.28324	1.19108	2.28324	up	chr6	-	161551056	161695107
AK021484	lincRNA-SYNPO2	10.1905	3.34915	10.1905	up	lincRNA	3422	chr4	+	119672345	119956974	overlap	NM_001128933	SYNPO2	synaptopodin-2 isoform b	3.27566	1.71179	3.27566	up	chr4	+	119809995	119959669
NR_026751	NCRNA00171	4.24582	2.08604	4.24582	up	RefSeq_NR	2445	chr6	-	29968788	30028961	upstream	NM_007028	TRIM31	E3 ubiquitin-protein ligase TRIM31	-2.11186	-1.07851	2.11186	down	chr6	-	30070673	30080867
ENST00000405197	AC064836.3	3.58106	1.84039	3.58106	up	Ensembl	704	chr2	-	203200746	203201450	downstream	NM_001005782	SUMO1	small ubiquitin-related modifier 1 isoform b	4.09072	2.03235	4.09072	up	chr2	-	203070902	203103322
chr2:202788106-202795396-	lincRNA-CDK15-2	-3.0226	-1.59579	3.0226	down	lincRNA	7291	chr2	-	202788106	202795396	upstream	NM_001005782	SUMO1	small ubiquitin-related modifier 1 isoform b	4.09072	2.03235	4.09072	up	chr2	-	203070902	203103322
CK905913	lincRNA-TTC17-2	-2.14203	-1.09898	2.14203	down	lincRNA	587	chr11	-	43606137	43694943	downstream	NM_001142931	API5	apoptosis inhibitor 5 isoform c	3.09262	1.62883	3.09262	up	chr11	+	43333504	43366080
AK091103		-3.01221	-1.59082	3.01221	down	misc_RNA	1924	chr4	-	174289045	174290964	downstream	NM_017423	GALNT7	N-acetylgalactosaminyltransferase 7	3.94408	1.97969	3.94408	up	chr4	+	174089903	174245118
ENST00000501118	AC010733.1	-4.3865	-2.13307	4.3865	down	Ensembl	2828	chr2	+	61159962	61163467	downstream	NM_032506	KIAA1841	KIAA1841 protein isoform b	-4.09471	-2.03376	4.09471	down	chr2	+	61293362	61365169
BG273037	lincRNA-CDH5-2	-2.07064	-1.05008	2.07064	down	lincRNA	387	chr16	+	66296092	66296464	downstream	NM_001040138	CKLF	chemokine-like factor isoform e	-2.26406	-1.17891	2.26406	down	chr16	+	66586465	66600190
uc002eoo.1	AK056683	-5.1563	-2.36634	5.1563	down	UCSC_knowngene	2147	chr16	+	66442426	66446038	downstream	NM_001040138	CKLF	chemokine-like factor isoform e	-2.26406	-1.17891	2.26406	down	chr16	+	66586465	66600190
ENST00000441053	AC067960.1	-3.589	-1.84358	3.589	down	Ensembl	812	chr2	-	121839012	121846302	downstream	NM_005270	GLI2	zinc finger protein GLI2	2.17519	1.12114	2.17519	up	chr2	+	121554866	121750229
ENST00000501118	AC010733.1	-4.3865	-2.13307	4.3865	down	Ensembl	2828	chr2	+	61159962	61163467	upstream	NM_002908	REL	proto-oncogene c-Rel	4.89762	2.29208	4.89762	up	chr2	+	61108751	61150178
Y00062	lincRNA-ATP6V1G3-2	-3.42699	-1.77694	3.42699	down	lincRNA	4597	chr1	+	198284952	198726330	overlap	NM_002838	PTPRC	receptor-type tyrosine-protein phosphatase C	-3.01015	-1.58983	3.01015	down	chr1	+	198608136	198726545
chr1:198335952-198347302-	lincRNA-NEK7	-3.08324	-1.62445	3.08324	down	lincRNA	11351	chr1	-	198335952	198347302	upstream	NM_002838	PTPRC	receptor-type tyrosine-protein phosphatase C	-3.01015	-1.58983	3.01015	down	chr1	+	198608136	198726545
AX747187	lincRNA-NEDD1-2	-4.78926	-2.2598	4.78926	down	lincRNA	2205	chr12	+	96933914	97024344	downstream	NM_152905	NEDD1	protein NEDD1 isoform b	4.53491	2.18107	4.53491	up	chr12	+	97301000	97347469
CF887548	lincRNA-NEDD1-3	-5.20864	-2.38091	5.20864	down	lincRNA	738	chr12	+	97211559	97269292	downstream	NM_152905	NEDD1	protein NEDD1 isoform b	4.53491	2.18107	4.53491	up	chr12	+	97301000	97347469
uc001hor.1	CR625980	-2.75976	-1.46454	2.75976	down	UCSC_knowngene	1385	chr1	+	224622613	224709674	upstream	NM_001136115	FBXO28	F-box only protein 28 isoform b	3.9731	1.99026	3.9731	up	chr1	+	224301790	224349749
chr13:42065250-42122000-	lincRNA-C13orf15-1	2.01939	1.01392	2.01939	up	lincRNA	56751	chr13	-	42065250	42122000	downstream	NM_014059	C13orf15	response gene to complement 32 protein	-4.04658	-2.0167	4.04658	down	chr13	+	42031541	42045013
ENST00000454403	RP11-396A22.4	2.75323	1.46113	2.75323	up	Ensembl	411	chr13	-	41958908	41959319	upstream	NM_014059	C13orf15	response gene to complement 32 protein	-4.04658	-2.0167	4.04658	down	chr13	+	42031541	42045013
AW361687	lincRNA-LNX2	-2.75784	-1.46354	2.75784	down	lincRNA	601	chr13	+	28003341	28423867	overlap	NM_002097	GTF3A	transcription factor IIIA	-2.5213	-1.33417	2.5213	down	chr13	+	27998680	28009846
ENST00000439492	AP000350.6	2.67961	1.42202	2.67961	up	Ensembl	1763	chr22	+	24269086	24271761	downstream	NM_001144931	LOC391322	D-dopachrome decarboxylase related protein	-2.13831	-1.09647	2.13831	down	chr22	+	24373116	24374043
AK126983		-2.44671	-1.29084	2.44671	down	misc_RNA	5637	chr22	-	24243618	24249255	upstream	NM_001144931	LOC391322	D-dopachrome decarboxylase related protein	-2.13831	-1.09647	2.13831	down	chr22	+	24373116	24374043
ENST00000430422	RP11-314A15.1	2.9333	1.55253	2.9333	up	Ensembl	1160	chrX	+	65014186	65015677	downstream	NM_001100431	VSIG4	V-set and immunoglobulin domain-containing	6.46341	2.6923	6.46341	up	chrX	-	65241579	65259967
ENST00000411804	RP1-91G5.3	-2.17384	-1.12024	2.17384	down	Ensembl	707	chr1	+	152346429	152417932	downstream	NM_014357	LCE2B	late cornified envelope protein 2B	-5.17519	-2.37161	5.17519	down	chr1	+	152658598	152659876
chr4:3297502-3310352-	lincRNA-C4orf44	-2.02512	-1.01801	2.02512	down	lincRNA	12851	chr4	-	3297502	3310352	downstream	NM_001042690	C4orf44	hypothetical protein LOC345222	-2.0333	-1.02382	2.0333	down	chr4	+	3250766	3258342
AI808306	lincRNA-COPS8-3	-2.2524	-1.17146	2.2524	down	lincRNA	451	chr2	-	238206329	238206871	upstream	NM_001042467	MLPH	melanophilin isoform 2	-7.12444	-2.83278	7.12444	down	chr2	+	238395877	238463961
chr5:171991045-172004045-	lincRNA-SH3PXD2B	-2.7265	-1.44705	2.7265	down	lincRNA	13001	chr5	-	171991045	172004045	upstream	NM_001142651	NEURL1B	E3 ubiquitin-protein ligase NEURL1B	-2.60606	-1.38187	2.60606	down	chr5	+	172068275	172118533
chr17:8905860-8924601-	lincRNA-PIK3R5	-4.63931	-2.21391	4.63931	down	lincRNA	18742	chr17	-	8905860	8924601	downstream	NM_152599	MFSD6L	major facilitator superfamily domain-containing	-15.7207	-3.97459	15.7207	down	chr17	-	8700427	8702667
chr17:8905860-8924601+	lincRNA-NTN1	-2.09613	-1.06773	2.09613	down	lincRNA	18742	chr17	+	8905860	8924601	upstream	NM_152599	MFSD6L	major facilitator superfamily domain-containing	-15.7207	-3.97459	15.7207	down	chr17	-	8700427	8702667
AK125261	lincRNA-CDHR3	-278.71	-8.12262	278.71	down	lincRNA	2199	chr7	+	105517266	105672911	upstream	NM_152749	ATXN7L1	ataxin-7-like protein 1 isoform 2	2.50111	1.32257	2.50111	up	chr7	-	105400635	105517031
AI808306	lincRNA-COPS8-3	-2.2524	-1.17146	2.2524	down	lincRNA	451	chr2	-	238206329	238206871	upstream	NM_024101	MLPH	melanophilin isoform 1	-3.13785	-1.64978	3.13785	down	chr2	+	238395877	238463961
DA453447	lincRNA-CLDN18	-2.04658	-1.03322	2.04658	down	lincRNA	557	chr3	-	137766396	137766951	upstream	NM_213654	ARMC8	armadillo repeat-containing protein 8 isoform 3	2.27205	1.184	2.27205	up	chr3	+	137906147	137965729
uc002vje.1	BC038542	2.34572	1.23003	2.34572	up	UCSC_knowngene	1008	chr2	-	219765535	219795358	downstream	NM_000784	CYP27A1	sterol 26-hydroxylase, mitochondrial precursor	2.62103	1.39013	2.62103	up	chr2	+	219646471	219680016
ENST00000416112	AP001793.1	-2.38806	-1.25584	2.38806	down	Ensembl	1595	chr18	+	8459155	8513727	downstream	NM_001025300	RAB12	ras-related protein Rab-12	2.70845	1.43747	2.70845	up	chr18	+	8609442	8639380
ENST00000438350	RP11-40H20.3	3.04761	1.60768	3.04761	up	Ensembl	221	chr1	+	27537754	27537975	upstream	NM_001013642	TRNP1	TMF-regulated nuclear protein 1	-4.86357	-2.28201	4.86357	down	chr1	+	27320194	27327377
AK021576		4.41447	2.14224	4.41447	up	NRED	2136	chr13	-	79890367	79924372	overlap	NM_022118	RBM26	RNA-binding protein 26	4.58622	2.1973	4.58622	up	chr13	-	79894099	79979923
BX102989	lincRNA-SPATA19-2	9.83884	3.29849	9.83884	up	lincRNA	350	chr11	-	133778893	133781850	upstream	NM_032801	JAM3	junctional adhesion molecule C isoform 1	2.43935	1.2865	2.43935	up	chr11	+	133938819	134021652
AI553950	lincRNA-INSL6	5.88501	2.55704	5.88501	up	lincRNA	449	chr9	+	5131978	5164252	downstream	NM_014143	CD274	programmed cell death 1 ligand 1 precursor	5.35297	2.42034	5.35297	up	chr9	+	5450502	5470567
BC036853	lincRNA-PDCD1LG2-2	2.56542	1.3592	2.56542	up	lincRNA	1660	chr9	-	5357968	5630071	overlap	NM_014143	CD274	programmed cell death 1 ligand 1 precursor	5.35297	2.42034	5.35297	up	chr9	+	5450502	5470567
BX098775	lincRNA-JAK2-1	4.02705	2.00972	4.02705	up	lincRNA	478	chr9	-	5132032	5165921	upstream	NM_014143	CD274	programmed cell death 1 ligand 1 precursor	5.35297	2.42034	5.35297	up	chr9	+	5450502	5470567
ENST00000509266	AC026979.1	-2.63836	-1.39964	2.63836	down	Ensembl	1967	chr8	-	30044816	30047775	upstream	NM_001008711	RBPMS	RNA-binding protein with multiple splicing	-2.02301	-1.0165	2.02301	down	chr8	+	30241943	30429734
AK056779		30.197	4.91633	30.197	up	misc_RNA	1969	chr8	+	30044816	30047775	downstream	NM_001008711	RBPMS	RNA-binding protein with multiple splicing	-2.02301	-1.0165	2.02301	down	chr8	+	30241943	30429734
BC043564	lincRNA-KCNA2-1	-35.6463	-5.15568	35.6463	down	lincRNA	2022	chr1	-	111136202	111174096	upstream	NM_002232	KCNA3	potassium voltage-gated channel subfamily A	-5.20569	-2.38009	5.20569	down	chr1	-	111214309	111217655
uc001pwp.1	AK097820	-5.61785	-2.49002	5.61785	down	UCSC_knowngene	1784	chr11	+	119252519	119397374	upstream	NM_014807	C2CD2L	C2 domain-containing protein 2-like	-3.25461	-1.70248	3.25461	down	chr11	+	118978092	118987827
ENST00000498979	AP003395.1	-4.2961	-2.10303	4.2961	down	Ensembl	2471	chr11	+	119252534	119371306	upstream	NM_014807	C2CD2L	C2 domain-containing protein 2-like	-3.25461	-1.70248	3.25461	down	chr11	+	118978092	118987827
BC032831	lincRNA-DAAM1-1	-2.08853	-1.06249	2.08853	down	lincRNA	2557	chr14	-	59895739	59932059	upstream	NM_206852	RTN1	reticulon-1 isoform C	-5.5448	-2.47114	5.5448	down	chr14	-	60062693	60097520
uc002uwa.2	AOX2	3.12505	1.64388	3.12505	up	UCSC_knowngene	978	chr2	+	201635394	201658962	upstream	NM_001160033	SGOL2	shugoshin-like 2 isoform 2	4.55374	2.18705	4.55374	up	chr2	+	201390864	201448818
AW139121	lincRNA-DUSP27	-2.87824	-1.52519	2.87824	down	lincRNA	577	chr1	-	167390174	167390743	upstream	NM_052862	RCSD1	capZ-interacting protein	-6.19959	-2.63217	6.19959	down	chr1	+	167599473	167675486
AK091319		2.33209	1.22162	2.33209	up	misc_RNA	2297	chrX	+	102851535	102853832	upstream	NM_014380	NGFRAP1	protein BEX3 isoform b	3.82328	1.93481	3.82328	up	chrX	+	102632108	102632999
AA731927	lincRNA-CDCA7-2	2.03662	1.02617	2.03662	up	lincRNA	270	chr2	-	174255520	174255791	downstream	NM_145810	CDCA7	cell division cycle-associated protein 7 isoform	13.2452	3.7274	13.2452	up	chr2	+	174219560	174233718
chr2:174248004-174261129+	lincRNA-SP3-2	-4.49564	-2.16853	4.49564	down	lincRNA	13126	chr2	+	174248004	174261129	upstream	NM_145810	CDCA7	cell division cycle-associated protein 7 isoform	13.2452	3.7274	13.2452	up	chr2	+	174219560	174233718
ENST00000457273	RP11-475O6.1	2.14993	1.10429	2.14993	up	Ensembl	1991	chr1	-	84267198	84326229	upstream	NM_002731	PRKACB	cAMP-dependent protein kinase catalytic subunit	7.42495	2.89238	7.42495	up	chr1	+	84543744	84704181
BM680929	lincRNA-PLA2G12B	3.40408	1.76726	3.40408	up	lincRNA	520	chr10	-	74761774	74762435	upstream	NM_173348	FAM149B1	hypothetical protein LOC317662	2.57878	1.36669	2.57878	up	chr10	+	74927876	75001939
CV346902	lincRNA-TMEM45B-1	2.02248	1.01612	2.02248	up	lincRNA	589	chr11	+	129596130	129596709	downstream	NM_138788	TMEM45B	transmembrane protein 45B	-18.1675	-4.18329	18.1675	down	chr11	+	129685740	129729898
ENST00000511090	AP003500.1	-3.69672	-1.88624	3.69672	down	Ensembl	973	chr11	-	129482019	129487164	upstream	NM_138788	TMEM45B	transmembrane protein 45B	-18.1675	-4.18329	18.1675	down	chr11	+	129685740	129729898
BC029586	lincRNA-UBE2V2-2	-88.8257	-6.47291	88.8257	down	lincRNA	1671	chr8	-	49623350	49647793	overlap	NM_024593	EFCAB1	EF-hand calcium-binding domain-containing	-72.3694	-6.17731	72.3694	down	chr8	-	49635952	49647870
BU681290	lincRNA-EFCAB1-3	-2.10518	-1.07394	2.10518	down	lincRNA	716	chr8	+	49623217	49623918	downstream	NM_024593	EFCAB1	EF-hand calcium-binding domain-containing	-72.3694	-6.17731	72.3694	down	chr8	-	49635952	49647870
chr11:13920449-13932999-	lincRNA-FAR1	-3.05212	-1.60981	3.05212	down	lincRNA	12551	chr11	-	13920449	13932999	downstream	NM_032228	FAR1	fatty acyl-CoA reductase 1	3.64952	1.86771	3.64952	up	chr11	+	13690205	13753893
EC495588	lincRNA-RCN2	-2.7378	-1.45302	2.7378	down	lincRNA	90	chr15	-	77271632	77272065	downstream	NM_002902	RCN2	reticulocalbin-2 precursor	2.64681	1.40425	2.64681	up	chr15	+	77223961	77242601
chr2:202788106-202795396-	lincRNA-CDK15-2	-3.0226	-1.59579	3.0226	down	lincRNA	7291	chr2	-	202788106	202795396	downstream	NM_001044385	ALS2CR4	amyotrophic lateral sclerosis 2 chromosomal	4.93459	2.30293	4.93459	up	chr2	-	202484906	202508224
AF083120		2.34474	1.22943	2.34474	up	misc_RNA	158	chr11	+	62321164	62321291	upstream	NM_003357	SCGB1A1	uteroglobin precursor	-1653.34	-10.6912	1653.34	down	chr11	+	62186506	62190678
exon91+	lincRNA-KNCN	-2.18488	-1.12755	2.18488	down	lincRNA	175	chr1	+	46989750	46989924	upstream	NM_001441	FAAH	fatty-acid amide hydrolase 1	4.72796	2.24122	4.72796	up	chr1	+	46859938	46879520
exon94-	lincRNA-DMBX1	2.50663	1.32575	2.50663	up	lincRNA	161	chr1	-	46996996	46997156	downstream	NM_001441	FAAH	fatty-acid amide hydrolase 1	4.72796	2.24122	4.72796	up	chr1	+	46859938	46879520
exon90+	lincRNA-KNCN	-2.88201	-1.52708	2.88201	down	lincRNA	643	chr1	+	46985867	46986509	upstream	NM_001441	FAAH	fatty-acid amide hydrolase 1	4.72796	2.24122	4.72796	up	chr1	+	46859938	46879520
AL832122		-2.09198	-1.06487	2.09198	down	misc_RNA	5572	chr1	-	23607802	23613245	downstream	NM_015013	KDM1A	lysine-specific histone demethylase 1A isoform	2.12198	1.08541	2.12198	up	chr1	+	23345940	23410184
ENST00000503091	AC008592.5	2.02386	1.01711	2.02386	up	Ensembl	665	chr5	+	95197489	95210223	upstream	NM_014899	RHOBTB3	rho-related BTB domain-containing protein 3	5.46862	2.45118	5.46862	up	chr5	+	95066849	95132071
uc003klp.2	FIS	-4.38836	-2.13368	4.38836	down	UCSC_knowngene	2049	chr5	+	95187935	95195834	upstream	NM_014899	RHOBTB3	rho-related BTB domain-containing protein 3	5.46862	2.45118	5.46862	up	chr5	+	95066849	95132071
NR_026936	C5orf27	-5.16779	-2.36955	5.16779	down	RefSeq_NR	1931	chr5	+	95187935	95195834	upstream	NM_014899	RHOBTB3	rho-related BTB domain-containing protein 3	5.46862	2.45118	5.46862	up	chr5	+	95066849	95132071
BC038573		3.16642	1.66285	3.16642	up	misc_RNA	556	chrX	-	46746855	46759139	upstream	NM_153280	UBA1	ubiquitin-like modifier-activating enzyme 1	-2.23788	-1.16214	2.23788	down	chrX	+	47050198	47074527
ENST00000442815	AP001046.5	-16.0107	-4.00097	16.0107	down	Ensembl	2798	chr21	-	44778026	44782229	downstream	NM_000394	CRYAA	alpha-crystallin A chain	2.12823	1.08965	2.12823	up	chr21	+	44589140	44592913
ENST00000427188	C21orf84	2.88149	1.52682	2.88149	up	Ensembl	967	chr21	-	44890312	44891472	downstream	NM_000394	CRYAA	alpha-crystallin A chain	2.12823	1.08965	2.12823	up	chr21	+	44589140	44592913
AW387651	lincRNA-TFE3	-2.2146	-1.14705	2.2146	down	lincRNA	232	chrX	-	48903267	49031062	downstream	NM_001080489	GLOD5	glyoxalase domain-containing protein 5	-12.3786	-3.62977	12.3786	down	chrX	+	48620153	48632064
chr4:25089927-25101952+	lincRNA-SEPSECS-1	-4.99774	-2.32128	4.99774	down	lincRNA	12026	chr4	+	25089927	25101952	upstream	NM_003102	SOD3	extracellular superoxide dismutase [Cu-Zn]	-5.39048	-2.43041	5.39048	down	chr4	+	24797084	24802467
uc001mkl.1	AK001432	2.67817	1.42125	2.67817	up	UCSC_knowngene	1558	chr11	-	13001081	13011095	upstream	NM_001178	ARNTL	aryl hydrocarbon receptor nuclear	2.00474	1.00341	2.00474	up	chr11	+	13299324	13408812
chr2:68206296-68223571+	lincRNA-C1D-1	-2.00067	-1.00048	2.00067	down	lincRNA	17276	chr2	+	68206296	68223571	downstream	NM_020143	PNO1	RNA-binding protein PNO1	2.87223	1.52217	2.87223	up	chr2	+	68385004	68403094
chr2:68206296-68223571-	lincRNA-ETAA1-2	-2.64421	-1.40283	2.64421	down	lincRNA	17276	chr2	-	68206296	68223571	upstream	NM_020143	PNO1	RNA-binding protein PNO1	2.87223	1.52217	2.87223	up	chr2	+	68385004	68403094
ENST00000415726	RP11-336K24.5	-7.80017	-2.9635	7.80017	down	Ensembl	401	chr1	+	155961180	155971578	downstream	NM_199173	BGLAP	osteocalcin preproprotein	2.79745	1.48411	2.79745	up	chr1	+	156211950	156213123
chr8:16980864-16988341-	lincRNA-EFHA2-1	-2.36313	-1.2407	2.36313	down	lincRNA	7478	chr8	-	16980864	16988341	upstream	NM_016353	ZDHHC2	palmitoyltransferase ZDHHC2	-2.70838	-1.43743	2.70838	down	chr8	+	17013835	17080241
DN918054	lincRNA-PDE4B	-2.1129	-1.07922	2.1129	down	lincRNA	400	chr1	-	66890612	67423817	upstream	NM_001013674	C1orf141	hypothetical protein LOC400757	-60.3377	-5.91499	60.3377	down	chr1	-	67557858	67594220
DN918055	lincRNA-SGIP1	2.4893	1.31574	2.4893	up	lincRNA	399	chr1	+	66890612	67423817	downstream	NM_001013674	C1orf141	hypothetical protein LOC400757	-60.3377	-5.91499	60.3377	down	chr1	-	67557858	67594220
ENST00000423943	RP11-48O20.4	-8.26514	-3.04704	8.26514	down	Ensembl	1113	chr1	+	159931013	159948851	downstream	NM_000702	ATP1A2	sodium/potassium-transporting ATPase subunit	-18.6743	-4.22298	18.6743	down	chr1	+	160085519	160113374
CF887548	lincRNA-NEDD1-3	-5.20864	-2.38091	5.20864	down	lincRNA	738	chr12	+	97211559	97269292	downstream	NM_001135176	NEDD1	protein NEDD1 isoform b	8.3831	3.06748	8.3831	up	chr12	+	97301000	97347469
AX747187	lincRNA-NEDD1-2	-4.78926	-2.2598	4.78926	down	lincRNA	2205	chr12	+	96933914	97024344	downstream	NM_001135176	NEDD1	protein NEDD1 isoform b	8.3831	3.06748	8.3831	up	chr12	+	97301000	97347469
ENST00000432147	RP4-735C1.5	6.9127	2.78925	6.9127	up	Ensembl	355	chr1	-	110353265	110353620	downstream	NM_000561	GSTM1	glutathione S-transferase Mu 1 isoform 1	-2.47267	-1.30607	2.47267	down	chr1	+	110230417	110236367
chr13:43764375-43778425-	lincRNA-DNAJC15	2.03656	1.02613	2.03656	up	lincRNA	14051	chr13	-	43764375	43778425	downstream	NM_033255	EPSTI1	epithelial-stromal interaction protein 1 isoform	4.48198	2.16414	4.48198	up	chr13	-	43462121	43566377
ENST00000419514	RP11-366O17.2	26.337	4.71902	26.337	up	Ensembl	192	chr13	+	43385972	43386428	downstream	NM_033255	EPSTI1	epithelial-stromal interaction protein 1 isoform	4.48198	2.16414	4.48198	up	chr13	-	43462121	43566377
AF083120		2.34474	1.22943	2.34474	up	misc_RNA	158	chr11	+	62321164	62321291	downstream	NM_004739	MTA2	metastasis-associated protein MTA2	-2.14309	-1.09969	2.14309	down	chr11	-	62360674	62369312
ENST00000450418	AC023480.1	3.67793	1.87889	3.67793	up	Ensembl	2315	chr3	-	4023664	4025979	downstream	NM_020873	LRRN1	leucine-rich repeat neuronal protein 1	-29.6799	-4.89141	29.6799	down	chr3	+	3841120	3889387
AK125137	lincRNA-AIM1-2	3.90618	1.96576	3.90618	up	lincRNA	4092	chr6	+	106808682	106969074	overlap	NM_001624	AIM1	absent in melanoma 1 protein	3.01898	1.59406	3.01898	up	chr6	+	106959729	107018334
chrX:102236694-102253244-	lincRNA-RAB40AL-1	-2.54696	-1.34878	2.54696	down	lincRNA	16551	chrX	-	102236694	102253244	downstream	NM_001142524	BHLHB9	protein BHLHb9	-2.42092	-1.27556	2.42092	down	chrX	+	101975641	102007369
BU690073	lincRNA-CCDC33	-5.68354	-2.50679	5.68354	down	lincRNA	416	chr15	+	74513616	74513896	upstream	NM_033250	PML	protein PML isoform 11	2.40919	1.26855	2.40919	up	chr15	+	74287013	74328735
chr15:74197716-74198633-	lincRNA-TBC1D21-1	-2.08145	-1.05759	2.08145	down	lincRNA	918	chr15	-	74197716	74198633	upstream	NM_033250	PML	protein PML isoform 11	2.40919	1.26855	2.40919	up	chr15	+	74287013	74328735
BG401674	lincRNA-AKAP8	-3.24052	-1.69623	3.24052	down	lincRNA	945	chr19	+	15424346	15425051	downstream	NM_173483	CYP4F22	cytochrome P450 4F22	-2.45663	-1.29668	2.45663	down	chr19	+	15619335	15663128
ENST00000439110	PTMAP6	2.64796	1.40488	2.64796	up	Ensembl	327	chr20	-	55275892	55276570	downstream	NM_001012971	C20orf106	hypothetical protein LOC200232 precursor	-4.81308	-2.26696	4.81308	down	chr20	+	55099784	55101208
BF509048	lincRNA-FAM9C-3	-2.73251	-1.45022	2.73251	down	lincRNA	740	chrX	-	13062942	13158595	downstream	NM_001039091	PRPS2	ribose-phosphate pyrophosphokinase 2 isoform 1	3.50583	1.80976	3.50583	up	chrX	+	12809473	12842346
CD557263	lincRNA-GABRP-1	2.12564	1.0879	2.12564	up	lincRNA	870	chr5	-	170279763	170280597	downstream	NM_014211	GABRP	gamma-aminobutyric acid receptor subunit pi	-9.02389	-3.17375	9.02389	down	chr5	+	170210722	170241050
AA863287	lincRNA-OR2AG2	-3.59825	-1.8473	3.59825	down	lincRNA	519	chr11	+	6754957	6767657	downstream	NM_013249	ZNF214	zinc finger protein 214	-3.86643	-1.951	3.86643	down	chr11	-	7020548	7041586
AK310900	lincRNA-SYT9	-6.03893	-2.59429	6.03893	down	lincRNA	4074	chr11	+	7041699	7159136	upstream	NM_013249	ZNF214	zinc finger protein 214	-3.86643	-1.951	3.86643	down	chr11	-	7020548	7041586
AV718641	lincRNA-PMCH	-2.29684	-1.19965	2.29684	down	lincRNA	636	chr12	-	102604245	102604880	downstream	NM_017915	C12orf48	PARP1-binding protein	2.67932	1.42187	2.67932	up	chr12	+	102513955	102591298
ENST00000432147	RP4-735C1.5	6.9127	2.78925	6.9127	up	Ensembl	355	chr1	-	110353265	110353620	downstream	NM_203404	AMPD2	AMP deaminase 2 isoform 3	2.29974	1.20147	2.29974	up	chr1	+	110168048	110174677
chr7:73684091-73687309-	lincRNA-RFC2	-2.20092	-1.13811	2.20092	down	lincRNA	3219	chr7	-	73684091	73687309	downstream	NM_032464	LAT2	linker for activation of T-cells family member	-2.1032	-1.07258	2.1032	down	chr7	+	73624086	73644164
ENST00000424605	RP11-125B21.2	2.53494	1.34195	2.53494	up	Ensembl	746	chr9	-	2535651	2570754	upstream	NM_014878	KIAA0020	KIAA0020 protein	3.07469	1.62044	3.07469	up	chr9	-	2804154	2844130
BE170396	lincRNA-TTLL11	2.79965	1.48524	2.79965	up	lincRNA	516	chr9	-	124882762	124883176	upstream	NM_198469	MORN5	MORN repeat-containing protein 5	-752.452	-9.55546	752.452	down	chr9	+	124922189	124962367
chr8:37531517-37542367+	lincRNA-ZNF703-1	-5.09302	-2.34852	5.09302	down	lincRNA	10851	chr8	+	37531517	37542367	downstream	NM_025069	ZNF703	zinc finger protein 703	-2.62667	-1.39324	2.62667	down	chr8	+	37553300	37556396
chr2:102880643-102894318+	lincRNA-IL1RL1	2.73885	1.45357	2.73885	up	lincRNA	13676	chr2	+	102880643	102894318	downstream	NM_003855	IL18R1	interleukin-18 receptor 1 precursor	4.21491	2.0755	4.21491	up	chr2	+	102979096	103015217
chr17:72383376-72409968-	lincRNA-GPR142	-3.23104	-1.692	3.23104	down	lincRNA	26593	chr17	-	72383376	72409968	downstream	NM_001172810	DNAI2	dynein intermediate chain 2, axonemal isoform 2	-4.38848	-2.13372	4.38848	down	chr17	+	72270385	72311023
AF289584	lincRNA-NKD1	-4.22266	-2.07815	4.22266	down	lincRNA	2142	chr16	+	50369047	50668127	upstream	NM_001114	ADCY7	adenylate cyclase type 7	-2.04236	-1.03024	2.04236	down	chr16	+	50321822	50352043
chr2:235039842-235057770-	lincRNA-SPP2-3	-2.24442	-1.16634	2.24442	down	lincRNA	17929	chr2	-	235039842	235057770	downstream	NM_006944	SPP2	secreted phosphoprotein 24 precursor	-2.04141	-1.02957	2.04141	down	chr2	+	234959345	234985776
ENST00000440088	AC090421.1	-2.76813	-1.46891	2.76813	down	Ensembl	2029	chr7	-	77286976	77325582	upstream	NM_001127360	PHTF2	putative homeodomain transcription factor 2	4.0161	2.0058	4.0161	up	chr7	+	77428108	77553500
BG210561	lincRNA-AGRP-2	-3.12553	-1.6441	3.12553	down	lincRNA	697	chr16	-	67551608	67552290	upstream	NM_001012984	C16orf86	hypothetical protein LOC388284	-2.55539	-1.35355	2.55539	down	chr16	+	67700716	67702661
DA955413	lincRNA-FAM65A-1	-17.2583	-4.10922	17.2583	down	lincRNA	562	chr16	+	67552113	67552675	downstream	NM_001012984	C16orf86	hypothetical protein LOC388284	-2.55539	-1.35355	2.55539	down	chr16	+	67700716	67702661
CN315150	lincRNA-FAM65A-3	-2.83035	-1.50098	2.83035	down	lincRNA	705	chr16	+	67536554	67537247	downstream	NM_001012984	C16orf86	hypothetical protein LOC388284	-2.55539	-1.35355	2.55539	down	chr16	+	67700716	67702661
EU831898	lincRNA-RPL29	-5.59124	-2.48317	5.59124	down	lincRNA	3142	chr3	-	51965892	52258329	upstream	NM_173341	PHF7	PHD finger protein 7 isoform 2	-2.65594	-1.40922	2.65594	down	chr3	+	52444526	52457657
ENST00000438772	AC036222.1	2.11264	1.07905	2.11264	up	Ensembl	595	chr17	-	46710868	46724152	upstream	NM_005175	ATP5G1	ATP synthase lipid-binding protein,	6.95822	2.79872	6.95822	up	chr17	+	46970147	46973232
BG679513	lincRNA-KCNT2-2	2.00837	1.00603	2.00837	up	lincRNA	868	chr1	+	193254821	193255677	upstream	NM_024529	CDC73	parafibromin	3.58027	1.84007	3.58027	up	chr1	+	193091087	193223942
chr5:141438289-141445854+	lincRNA-NDFIP1	-2.80543	-1.48822	2.80543	down	lincRNA	7566	chr5	+	141438289	141445854	downstream	NM_001127496	SPRY4	protein sprouty homolog 4 isoform 2	-2.63359	-1.39703	2.63359	down	chr5	-	141689991	141704620
chr2:237506710-237517672+	lincRNA-COPS8-4	-2.42702	-1.27918	2.42702	down	lincRNA	10963	chr2	+	237506710	237517672	upstream	NM_024726	IQCA1	IQ and AAA domain-containing protein 1	-5.95492	-2.57408	5.95492	down	chr2	-	237232793	237416092
BM680929	lincRNA-PLA2G12B	3.40408	1.76726	3.40408	up	lincRNA	520	chr10	-	74761774	74762435	upstream	NM_016065	MRPS16	28S ribosomal protein S16, mitochondrial	2.63555	1.39811	2.63555	up	chr10	-	75008600	75012451
chr15:74197716-74198633-	lincRNA-TBC1D21-1	-2.08145	-1.05759	2.08145	down	lincRNA	918	chr15	-	74197716	74198633	upstream	NM_033238	PML	protein PML isoform 1	2.2435	1.16575	2.2435	up	chr15	+	74287013	74340155
BU690073	lincRNA-CCDC33	-5.68354	-2.50679	5.68354	down	lincRNA	416	chr15	+	74513616	74513896	upstream	NM_033238	PML	protein PML isoform 1	2.2435	1.16575	2.2435	up	chr15	+	74287013	74340155
ENST00000507241	CTC-428G20.3	2.42645	1.27885	2.42645	up	Ensembl	2231	chr5	-	114539712	114541943	downstream	NM_001017397	TRIM36	E3 ubiquitin-protein ligase TRIM36 isoform 2	-2.32622	-1.21798	2.32622	down	chr5	-	114506798	114516243
ENST00000512322	RP11-792D21.2	6.56611	2.71504	6.56611	up	Ensembl	2095	chr4	+	79567370	79603853	downstream	NM_001040202	PAQR3	progestin and adipoQ receptor family member 3	3.16104	1.6604	3.16104	up	chr4	-	79839093	79860582
uc003hlr.1	BC036848	-4.9524	-2.30813	4.9524	down	UCSC_knowngene	756	chr4	+	79892901	80229698	upstream	NM_001040202	PAQR3	progestin and adipoQ receptor family member 3	3.16104	1.6604	3.16104	up	chr4	-	79839093	79860582
uc003hlf.2	AK130099	7.35219	2.87817	7.35219	up	UCSC_knowngene	2778	chr4	+	79567337	79604337	downstream	NM_001040202	PAQR3	progestin and adipoQ receptor family member 3	3.16104	1.6604	3.16104	up	chr4	-	79839093	79860582
chr1:149731347-149744257-	lincRNA-PPIAL4B-1	-5.38289	-2.42838	5.38289	down	lincRNA	12911	chr1	-	149731347	149744257	upstream	NM_000566	FCGR1A	high affinity immunoglobulin gamma Fc receptor I	15.9561	3.99603	15.9561	up	chr1	+	149754249	149764074
AK291502	lincRNA-HIST2H2BF	8.26226	3.04654	8.26226	up	lincRNA	1686	chr1	+	149369293	149763584	overlap	NM_000566	FCGR1A	high affinity immunoglobulin gamma Fc receptor I	15.9561	3.99603	15.9561	up	chr1	+	149754249	149764074
ENST00000402768	RP11-15H7.1	2.14433	1.10053	2.14433	up	Ensembl	767	chr6	-	139935574	139936341	downstream	NM_001168389	CITED2	cbp/p300-interacting transactivator 2	19.5981	4.29264	19.5981	up	chr6	-	139693396	139695350
ENST00000415252	RP1-3D11.2	-2.31567	-1.21143	2.31567	down	Ensembl	457	chrX	-	106756212	106789051	downstream	NM_001169154	CXorf41	hypothetical protein LOC139212	-29.6546	-4.89019	29.6546	down	chrX	+	106449861	106487473
NR_027064	PLAC2	-2.73082	-1.44934	2.73082	down	RefSeq_NR	3693	chr19	-	5558179	5568005	upstream	NM_198707	HSD11B1L	hydroxysteroid 11-beta-dehydrogenase 1-like	-2.36468	-1.24164	2.36468	down	chr19	+	5681051	5688533
AK302893	lincRNA-MICAL2-1	4.3357	2.11626	4.3357	up	lincRNA	3585	chr11	+	12115542	12284466	downstream	NM_032867	MICALCL	MICAL C-terminal-like protein	-2.70837	-1.43743	2.70837	down	chr11	+	12308446	12380691
chr15:74197716-74198633-	lincRNA-TBC1D21-1	-2.08145	-1.05759	2.08145	down	lincRNA	918	chr15	-	74197716	74198633	upstream	NM_005545	ISLR	immunoglobulin superfamily containing	-2.14722	-1.10247	2.14722	down	chr15	+	74466086	74469212
DA857280	lincRNA-SEMA7A	-3.95244	-1.98275	3.95244	down	lincRNA	581	chr15	+	74683148	74683728	upstream	NM_005545	ISLR	immunoglobulin superfamily containing	-2.14722	-1.10247	2.14722	down	chr15	+	74466086	74469212
BU690073	lincRNA-CCDC33	-5.68354	-2.50679	5.68354	down	lincRNA	416	chr15	+	74513616	74513896	upstream	NM_005545	ISLR	immunoglobulin superfamily containing	-2.14722	-1.10247	2.14722	down	chr15	+	74466086	74469212
ENST00000432147	RP4-735C1.5	6.9127	2.78925	6.9127	up	Ensembl	355	chr1	-	110353265	110353620	downstream	NM_031936	GPR61	probable G-protein coupled receptor 61	4.69334	2.23062	4.69334	up	chr1	+	110082493	110088455
AX747492	lincRNA-HFE2	2.0936	1.06599	2.0936	up	lincRNA	4510	chr1	+	145209144	146424095	upstream	NM_001002810	PDE4DIP	myomegalin isoform 4	-2.30503	-1.20479	2.30503	down	chr1	-	144951760	144995033
uc003igh.1	AK093416	-2.70724	-1.43682	2.70724	down	UCSC_knowngene	2012	chr4	+	129349224	129440549	downstream	NM_024900	PHF17	protein Jade-1 short isoform	-2.28494	-1.19215	2.28494	down	chr4	+	129730778	129785787
chr16:84296674-84307824+	lincRNA-WFDC1	-2.65977	-1.4113	2.65977	down	lincRNA	11151	chr16	+	84296674	84307824	downstream	NM_021197	WFDC1	WAP four-disulfide core domain protein 1	2.237	1.16157	2.237	up	chr16	+	84328400	84363450
ENST00000511512	RP11-71E19.1	-3.4917	-1.80393	3.4917	down	Ensembl	501	chr3	+	125985638	126010122	upstream	NM_012190	ALDH1L1	aldehyde dehydrogenase family 1 member L1	-38.9769	-5.28455	38.9769	down	chr3	-	125822407	125899485
AK097728	lincRNA-PRLHR-1	4.38514	2.13262	4.38514	up	lincRNA	1798	chr10	-	120433633	120514558	overlap	NM_153810	C10orf46	chromosome 10 open reading frame 46	2.27298	1.18459	2.27298	up	chr10	-	120440493	120514758
EU831898	lincRNA-RPL29	-5.59124	-2.48317	5.59124	down	lincRNA	3142	chr3	-	51965892	52258329	overlap	NM_000688	ALAS1	5-aminolevulinate synthase, nonspecific,	-3.44955	-1.78641	3.44955	down	chr3	+	52232143	52248343
CA439425	lincRNA-C9orf85	5.19334	2.37666	5.19334	up	lincRNA	668	chr9	-	74598216	74598868	downstream	NM_001135820	TMEM2	transmembrane protein 2 isoform b	-4.18577	-2.06549	4.18577	down	chr9	-	74298281	74383800
DB337946	lincRNA-ZBTB37-2	6.40161	2.67843	6.40161	up	lincRNA	538	chr1	-	173868049	173868587	downstream	NM_018122	DARS2	aspartyl-tRNA synthetase, mitochondrial	4.98585	2.31784	4.98585	up	chr1	+	173793796	173827682
uc001gjk.2	GAS5	3.11184	1.63777	3.11184	up	UCSC_knowngene	1695	chr1	-	173833039	173837125	downstream	NM_018122	DARS2	aspartyl-tRNA synthetase, mitochondrial	4.98585	2.31784	4.98585	up	chr1	+	173793796	173827682
CR595169		6.22682	2.6385	6.22682	up	RNAdb	1493	chr1	-	173833394	173836186	downstream	NM_018122	DARS2	aspartyl-tRNA synthetase, mitochondrial	4.98585	2.31784	4.98585	up	chr1	+	173793796	173827682
DB525109	lincRNA-CENPW-1	-2.34052	-1.22683	2.34052	down	lincRNA	483	chr6	+	126397593	126398803	upstream	NM_001031712	TRMT11	tRNA guanosine-2'-O-methyltransferase TRM11	2.05331	1.03795	2.05331	up	chr6	+	126307575	126360420
ENST00000512349	CTD-2313F11.2	-2.05774	-1.04106	2.05774	down	Ensembl	591	chr5	+	54350255	54350968	downstream	NM_015360	SKIV2L2	superkiller viralicidic activity 2-like 2	5.4426	2.4443	5.4426	up	chr5	+	54603575	54721409
AK293746	lincRNA-NDST1-2	2.49547	1.31931	2.49547	up	lincRNA	3451	chr5	+	149877339	149933276	overlap	NM_001543	NDST1	bifunctional heparan sulfate	3.54951	1.82762	3.54951	up	chr5	+	149887673	149937773
AI218855	lincRNA-RPS14-2	-5.7829	-2.53179	5.7829	down	lincRNA	269	chr5	-	149855120	149864849	upstream	NM_001543	NDST1	bifunctional heparan sulfate	3.54951	1.82762	3.54951	up	chr5	+	149887673	149937773
AF191495	lincRNA-F11R	4.10745	2.03824	4.10745	up	lincRNA	2187	chr1	-	160967605	161008711	downstream	NM_002348	LY9	T-lymphocyte surface antigen Ly-9 isoform a	-5.34671	-2.41865	5.34671	down	chr1	+	160765927	160798045
ENST00000502790	RP11-692D12.1	-2.42015	-1.2751	2.42015	down	Ensembl	685	chr4	+	74124925	74183670	upstream	NM_173827	COX18	mitochondrial inner membrane protein COX18	2.18826	1.12978	2.18826	up	chr4	-	73920415	73935472
ENST00000439492	AP000350.6	2.67961	1.42202	2.67961	up	Ensembl	1763	chr22	+	24269086	24271761	downstream	NM_001084393	DDTL	D-dopachrome decarboxylase-like protein	3.29326	1.71952	3.29326	up	chr22	+	24309025	24314748
AK126983		-2.44671	-1.29084	2.44671	down	misc_RNA	5637	chr22	-	24243618	24249255	upstream	NM_001084393	DDTL	D-dopachrome decarboxylase-like protein	3.29326	1.71952	3.29326	up	chr22	+	24309025	24314748
DY655635	lincRNA-C16orf75-2	-2.69833	-1.43207	2.69833	down	lincRNA	379	chr16	-	11477618	11478868	downstream	NM_015226	CLEC16A	protein CLEC16A	3.50003	1.80737	3.50003	up	chr16	+	11038344	11276046
ENST00000508179	CTD-2001E22.2	4.31588	2.10965	4.31588	up	Ensembl	1799	chr5	+	9546311	9550721	upstream	NM_003966	SEMA5A	semaphorin-5A precursor	-6.38051	-2.67367	6.38051	down	chr5	-	9035137	9546233
ENST00000450559	RP11-576N17.3	-2.18187	-1.12557	2.18187	down	Ensembl	1004	chr4	+	84168330	84169334	upstream	NM_001130715	PLAC8	placenta-specific gene 8 protein	-3.52825	-1.81895	3.52825	down	chr4	-	84015306	84035911
ENST00000515670	RP11-576N17.5	-2.19636	-1.13512	2.19636	down	Ensembl	394	chr4	-	84154664	84168366	downstream	NM_001130715	PLAC8	placenta-specific gene 8 protein	-3.52825	-1.81895	3.52825	down	chr4	-	84015306	84035911
uc001pwp.1	AK097820	-5.61785	-2.49002	5.61785	down	UCSC_knowngene	1784	chr11	+	119252519	119397374	upstream	NM_021729	VPS11	vacuolar protein sorting-associated protein 11	-2.06062	-1.04308	2.06062	down	chr11	+	118938492	118952688
ENST00000498979	AP003395.1	-4.2961	-2.10303	4.2961	down	Ensembl	2471	chr11	+	119252534	119371306	upstream	NM_021729	VPS11	vacuolar protein sorting-associated protein 11	-2.06062	-1.04308	2.06062	down	chr11	+	118938492	118952688
CN413083	lincRNA-UFC1	4.63202	2.21164	4.63202	up	lincRNA	687	chr1	+	161106389	161107075	downstream	NM_000309	PPOX	protoporphyrinogen oxidase	-2.52471	-1.33612	2.52471	down	chr1	+	161136180	161141010
AF191495	lincRNA-F11R	4.10745	2.03824	4.10745	up	lincRNA	2187	chr1	-	160967605	161008711	upstream	NM_000309	PPOX	protoporphyrinogen oxidase	-2.52471	-1.33612	2.52471	down	chr1	+	161136180	161141010
CD722072	lincRNA-ODZ3-2	2.15023	1.10449	2.15023	up	lincRNA	570	chr4	-	183794112	183794682	upstream	NM_024949	WWC2	protein WWC2	2.36689	1.24299	2.36689	up	chr4	+	184020462	184241929
DC428746	lincRNA-ARHGAP15	-2.31454	-1.21073	2.31454	down	lincRNA	577	chr2	+	143828536	143986326	upstream	NM_001032998	KYNU	kynureninase isoform b	7.32937	2.87369	7.32937	up	chr2	+	143635194	143747106
BC043564	lincRNA-KCNA2-1	-35.6463	-5.15568	35.6463	down	lincRNA	2022	chr1	-	111136202	111174096	upstream	NM_000560	CD53	leukocyte surface antigen CD53	-2.89983	-1.53597	2.89983	down	chr1	+	111415721	111442558
AW387651	lincRNA-TFE3	-2.2146	-1.14705	2.2146	down	lincRNA	232	chrX	-	48903267	49031062	upstream	NM_001098411	GAGE2B	G antigen 2B/2C	-3.34818	-1.74338	3.34818	down	chrX	+	49235707	49242997
chr13:106073699-106106224-	lincRNA-SLC10A2-4	-4.09166	-2.03269	4.09166	down	lincRNA	32526	chr13	-	106073699	106106224	upstream	NM_172370	DAOA	D-amino acid oxidase activator isoform 1	-2.1945	-1.13389	2.1945	down	chr13	+	106118363	106143383
BG926920	lincRNA-CSNK1A1	-2.70906	-1.43779	2.70906	down	lincRNA	665	chr5	+	148836893	148837488	downstream	NM_001892	CSNK1A1	casein kinase I isoform alpha isoform 2	2.17374	1.12018	2.17374	up	chr5	-	148874844	148931007
chr5:148834826-148846630-	lincRNA-IL17B	-2.84543	-1.50865	2.84543	down	lincRNA	11805	chr5	-	148834826	148846630	upstream	NM_001892	CSNK1A1	casein kinase I isoform alpha isoform 2	2.17374	1.12018	2.17374	up	chr5	-	148874844	148931007
AK095243		4.05763	2.02064	4.05763	up	misc_RNA	2460	chr17	-	39805306	39807765	downstream	NM_153490	KRT13	keratin, type I cytoskeletal 13 isoform a	-2.25172	-1.17103	2.25172	down	chr17	-	39657232	39661865
AK094723		12.8915	3.68835	12.8915	up	misc_RNA	2466	chr17	+	39821817	39824283	upstream	NM_153490	KRT13	keratin, type I cytoskeletal 13 isoform a	-2.25172	-1.17103	2.25172	down	chr17	-	39657232	39661865
BE170396	lincRNA-TTLL11	2.79965	1.48524	2.79965	up	lincRNA	516	chr9	-	124882762	124883176	upstream	NM_033117	RBM18	probable RNA-binding protein 18	2.22955	1.15675	2.22955	up	chr9	-	125001833	125027143
chr20:541348-562112-	lincRNA-CSNK2A1	-3.54682	-1.82653	3.54682	down	lincRNA	20765	chr20	-	541348	562112	upstream	NM_001042353	FAM110A	hypothetical protein LOC83541	-4.01077	-2.00388	4.01077	down	chr20	+	814355	826922
BE244504	lincRNA-FAM110A	5.09107	2.34797	5.09107	up	lincRNA	447	chr20	-	837118	837565	downstream	NM_001042353	FAM110A	hypothetical protein LOC83541	-4.01077	-2.00388	4.01077	down	chr20	+	814355	826922
AI252667	lincRNA-WNT11	-2.11725	-1.08219	2.11725	down	lincRNA	438	chr11	-	76001616	76002054	downstream	NM_003369	UVRAG	UV radiation resistance-associated gene protein	5.65869	2.50047	5.65869	up	chr11	+	75526211	75855282
CR615581	lincRNA-ANGPT4	-2.14493	-1.10093	2.14493	down	lincRNA	1325	chr20	+	825766	838103	overlap	NM_001042353	FAM110A	hypothetical protein LOC83541	-4.01077	-2.00388	4.01077	down	chr20	+	814355	826922
DY655635	lincRNA-C16orf75-2	-2.69833	-1.43207	2.69833	down	lincRNA	379	chr16	-	11477618	11478868	downstream	NM_021247	PRM3	protamine-3	-2.00893	-1.00642	2.00893	down	chr16	-	11367143	11367452
BX100522	lincRNA-TET2-3	4.79579	2.26177	4.79579	up	lincRNA	467	chr4	-	106093667	106274038	upstream	NM_017700	ARHGEF38	rho guanine nucleotide exchange factor 38	7.35016	2.87777	7.35016	up	chr4	+	106473776	106552837
BU681290	lincRNA-EFCAB1-3	-2.10518	-1.07394	2.10518	down	lincRNA	716	chr8	+	49623217	49623918	downstream	NM_001142857	EFCAB1	EF-hand calcium-binding domain-containing	-39.478	-5.30298	39.478	down	chr8	-	49627473	49647870
BC029586	lincRNA-UBE2V2-2	-88.8257	-6.47291	88.8257	down	lincRNA	1671	chr8	-	49623350	49647793	overlap	NM_001142857	EFCAB1	EF-hand calcium-binding domain-containing	-39.478	-5.30298	39.478	down	chr8	-	49627473	49647870
uc001wxl.2	BC084561	-3.54052	-1.82396	3.54052	down	UCSC_knowngene	2301	chr14	-	50504312	50507947	upstream	NM_001040662	METTL21D	methyltransferase-like protein 21D isoform b	2.44421	1.28937	2.44421	up	chr14	-	50575349	50583297
DR007897	lincRNA-POU2AF1	-2.4789	-1.3097	2.4789	down	lincRNA	521	chr11	-	111320592	111322036	upstream	NM_001100388	C11orf88	hypothetical protein LOC399949 isoform 2	-2156.29	-11.0743	2156.29	down	chr11	+	111385509	111407756
ENST00000427240	RP11-69E11.5	2.04094	1.02923	2.04094	up	Ensembl	813	chr1	-	39997509	40024379	upstream	NM_032526	NT5C1A	cytosolic 5'-nucleotidase 1A	-2.12107	-1.0848	2.12107	down	chr1	-	40124792	40137710
uc003ejk.2	BX537548	-4.82234	-2.26973	4.82234	down	UCSC_knowngene	3078	chr3	-	127199533	127255803	upstream	NM_004526	MCM2	DNA replication licensing factor MCM2	5.12706	2.35813	5.12706	up	chr3	+	127317252	127341278
AK057313	lincRNA-PTPN4	-9.56269	-3.25742	9.56269	down	lincRNA	2048	chr2	+	120436774	120481191	upstream	NM_001029996	PCDP1	primary ciliary dyskinesia protein 1	-18.3888	-4.20076	18.3888	down	chr2	+	120302024	120414237
uc002eoo.1	AK056683	-5.1563	-2.36634	5.1563	down	UCSC_knowngene	2147	chr16	+	66442426	66446038	downstream	NM_181296	CMTM1	CKLF-like MARVEL transmembrane domain-containing	-3.20518	-1.6804	3.20518	down	chr16	+	66600293	66613038
chr1:228917027-228938752-	lincRNA-RHOU-6	-2.22474	-1.15364	2.22474	down	lincRNA	21726	chr1	-	228917027	228938752	downstream	NM_175055	HIST3H2BB	histone H2B type 3-B	-2.99995	-1.58494	2.99995	down	chr1	+	228645807	228646259
AI808306	lincRNA-COPS8-3	-2.2524	-1.17146	2.2524	down	lincRNA	451	chr2	-	238206329	238206871	downstream	NM_006710	COPS8	COP9 signalosome complex subunit 8 isoform 1	2.27126	1.1835	2.27126	up	chr2	+	237994083	238007489
uc002vwf.1	AK056246	-2.75297	-1.46099	2.75297	down	UCSC_knowngene	2341	chr2	-	237968076	237994460	overlap	NM_006710	COPS8	COP9 signalosome complex subunit 8 isoform 1	2.27126	1.1835	2.27126	up	chr2	+	237994083	238007489
uc001znn.1	LOC729082	2.01841	1.01322	2.01841	up	UCSC_knowngene	1379	chr15	+	41576200	41601901	downstream	NM_001129897	NUSAP1	nucleolar and spindle-associated protein 1	17.1335	4.09875	17.1335	up	chr15	+	41624925	41673248
NR_026757	LOC729082	2.17085	1.11826	2.17085	up	RefSeq_NR	1894	chr15	+	41576200	41591794	downstream	NM_001129897	NUSAP1	nucleolar and spindle-associated protein 1	17.1335	4.09875	17.1335	up	chr15	+	41624925	41673248
chr6:24977604-24998368+	lincRNA-LRRC16A-2	-3.0603	-1.61368	3.0603	down	lincRNA	20765	chr6	+	24977604	24998368	upstream	NM_015895	GMNN	geminin	4.49011	2.16675	4.49011	up	chr6	+	24775163	24786278
ENST00000510784	AL160400.1	-2.45538	-1.29595	2.45538	down	Ensembl	1029	chr6	-	25015180	25042398	downstream	NM_015895	GMNN	geminin	4.49011	2.16675	4.49011	up	chr6	+	24775163	24786278
chrX:102236694-102253244-	lincRNA-RAB40AL-1	-2.54696	-1.34878	2.54696	down	lincRNA	16551	chrX	-	102236694	102253244	downstream	NM_001142529	BHLHB9	protein BHLHb9	-18.7921	-4.23205	18.7921	down	chrX	+	102000906	102007369
AK300950	lincRNA-FAM65B-1	-21.1847	-4.40495	21.1847	down	lincRNA	2415	chr6	-	24840552	25042246	downstream	NM_015895	GMNN	geminin	4.49011	2.16675	4.49011	up	chr6	+	24775163	24786278
AX747237	lincRNA-KIFC3	2.27272	1.18442	2.27272	up	lincRNA	3159	chr16	-	57792130	57896733	downstream	NM_001145773	GPR56	G-protein coupled receptor 56 isoform c	-2.15665	-1.10879	2.15665	down	chr16	+	57662418	57698944
ENST00000515077	CTD-2187J20.1	-4.06437	-2.02303	4.06437	down	Ensembl	509	chr5	+	66563849	66566010	upstream	NM_015183	MAST4	microtubule-associated serine/threonine-protein	-2.57522	-1.36469	2.57522	down	chr5	+	66124603	66465423
ENST00000510964	AC092373.1	2.96614	1.56859	2.96614	up	Ensembl	2403	chr5	+	65492116	65867801	downstream	NM_015183	MAST4	microtubule-associated serine/threonine-protein	-2.57522	-1.36469	2.57522	down	chr5	+	66124603	66465423
BC002759	lincRNA-SLC48A1	-2.29143	-1.19625	2.29143	down	lincRNA	1041	chr12	+	48165369	48176533	downstream	NM_024056	TMEM106C	transmembrane protein 106C isoform a	3.64195	1.86471	3.64195	up	chr12	+	48357329	48362661
AK299029	lincRNA-RAPGEF3	-4.06608	-2.02364	4.06608	down	lincRNA	2776	chr12	-	48131323	48164823	upstream	NM_024056	TMEM106C	transmembrane protein 106C isoform a	3.64195	1.86471	3.64195	up	chr12	+	48357329	48362661
ENST00000242475	ARL4P	2.56175	1.35713	2.56175	up	Ensembl	1125	chr10	+	62444040	62445165	downstream	NM_033379	CDK1	cyclin-dependent kinase 1 isoform 2	12.9704	3.69715	12.9704	up	chr10	+	62538211	62554610
AX747237	lincRNA-KIFC3	2.27272	1.18442	2.27272	up	lincRNA	3159	chr16	-	57792130	57896733	upstream	NM_020807	ZNF319	zinc finger protein 319	-3.48497	-1.80114	3.48497	down	chr16	-	58028572	58033762
AK091319		2.33209	1.22162	2.33209	up	misc_RNA	2297	chrX	+	102851535	102853832	downstream	NM_001006639	TCEAL1	transcription elongation factor A protein-like	-3.42781	-1.77729	3.42781	down	chrX	+	102883891	102885876
EU831898	lincRNA-RPL29	-5.59124	-2.48317	5.59124	down	lincRNA	3142	chr3	-	51965892	52258329	upstream	NM_007184	NISCH	nischarin	-2.5292	-1.33868	2.5292	down	chr3	+	52489523	52527088
BU664086	lincRNA-ENAH-1	-2.2633	-1.17843	2.2633	down	lincRNA	687	chr1	-	225860476	225861152	upstream	NM_001130440	SRP9	signal recognition particle 9 kDa protein	3.48664	1.80184	3.48664	up	chr1	+	225965514	225978168
CR599308	lincRNA-AEBP2-2	7.32707	2.87324	7.32707	up	lincRNA	2138	chr12	+	19556999	19672288	overlap	NM_153207	AEBP2	zinc finger protein AEBP2 isoform a	15.569	3.9606	15.569	up	chr12	+	19592607	19675173
BC070168	lincRNA-TSPAN8	-140.358	-7.13297	140.358	down	lincRNA	1543	chr12	-	71518868	71835678	upstream	NM_144982	ZFC3H1	zinc finger C3H1 domain-containing protein	2.07317	1.05184	2.07317	up	chr12	-	72003378	72057749
chr2:72079817-72089167+	lincRNA-CYP26B1	-2.07548	-1.05345	2.07548	down	lincRNA	9351	chr2	+	72079817	72089167	upstream	NM_001130976	DYSF	dysferlin isoform 9	2.20467	1.14056	2.20467	up	chr2	+	71680752	71913893
exon1609+	lincRNA-PPP2R5C-2	-2.86566	-1.51887	2.86566	down	lincRNA	198	chr14	+	102055149	102055346	downstream	NM_178587	PPP2R5C	serine/threonine-protein phosphatase 2A 56 kDa	-2.32095	-1.21471	2.32095	down	chr14	+	102276139	102378962
exon1607+	lincRNA-PPP2R5C-2	-2.54169	-1.34579	2.54169	down	lincRNA	191	chr14	+	102051986	102052176	downstream	NM_178587	PPP2R5C	serine/threonine-protein phosphatase 2A 56 kDa	-2.32095	-1.21471	2.32095	down	chr14	+	102276139	102378962
AW274645	lincRNA-PPP2R5C-1	-2.69472	-1.43013	2.69472	down	lincRNA	367	chr14	-	102415403	102416162	downstream	NM_178587	PPP2R5C	serine/threonine-protein phosphatase 2A 56 kDa	-2.32095	-1.21471	2.32095	down	chr14	+	102276139	102378962
BG926920	lincRNA-CSNK1A1	-2.70906	-1.43779	2.70906	down	lincRNA	665	chr5	+	148836893	148837488	downstream	NM_001025105	CSNK1A1	casein kinase I isoform alpha isoform 1	2.08931	1.06303	2.08931	up	chr5	-	148874844	148931007
chr5:148834826-148846630-	lincRNA-IL17B	-2.84543	-1.50865	2.84543	down	lincRNA	11805	chr5	-	148834826	148846630	upstream	NM_001025105	CSNK1A1	casein kinase I isoform alpha isoform 1	2.08931	1.06303	2.08931	up	chr5	-	148874844	148931007
CK819477	lincRNA-APLN-2	-5.93216	-2.56856	5.93216	down	lincRNA	356	chrX	-	128809864	128812318	upstream	NM_018990	SASH3	SAM and SH3 domain-containing protein 3	-3.14689	-1.65393	3.14689	down	chrX	+	128913891	128929176
BF739255	lincRNA-APLN-1	2.15677	1.10888	2.15677	up	lincRNA	163	chrX	-	128835377	128835612	upstream	NM_018990	SASH3	SAM and SH3 domain-containing protein 3	-3.14689	-1.65393	3.14689	down	chrX	+	128913891	128929176
AF085837		-2.53097	-1.33969	2.53097	down	misc_RNA	646	chr2	+	158768309	158768939	downstream	NM_138803	CCDC148	coiled-coil domain-containing protein 148	-2.91138	-1.5417	2.91138	down	chr2	-	159027868	159313265
BM956062	lincRNA-PGS1	5.70521	2.51228	5.70521	up	lincRNA	174	chr17	+	76360558	76360732	upstream	NM_001012270	BIRC5	baculoviral IAP repeat-containing protein 5	19.199	4.26296	19.199	up	chr17	+	76210276	76221716
AK091319		2.33209	1.22162	2.33209	up	misc_RNA	2297	chrX	+	102851535	102853832	downstream	NM_001006933	TCEAL3	transcription elongation factor A protein-like	-2.16329	-1.11323	2.16329	down	chrX	+	102862833	102864855
ENST00000457273	RP11-475O6.1	2.14993	1.10429	2.14993	up	Ensembl	1991	chr1	-	84267198	84326229	upstream	NM_207578	PRKACB	cAMP-dependent protein kinase catalytic subunit	-3.05505	-1.6112	3.05505	down	chr1	+	84543744	84670979
AW387651	lincRNA-TFE3	-2.2146	-1.14705	2.2146	down	lincRNA	232	chrX	-	48903267	49031062	upstream	NM_001127199	GAGE12D	G antigen 12B/C/D/E	-3.07101	-1.61871	3.07101	down	chrX	+	49306324	49313710
BM466146	lincRNA-ZNF396	-3.55756	-1.83089	3.55756	down	lincRNA	793	chr18	-	33026128	33026905	downstream	NM_145756	ZNF396	zinc finger protein 396	-2.21751	-1.14894	2.21751	down	chr18	-	32946660	32957301
AK293062	lincRNA-GALNT1-2	5.02365	2.32874	5.02365	up	lincRNA	2194	chr18	+	33161002	33290012	upstream	NM_145756	ZNF396	zinc finger protein 396	-2.21751	-1.14894	2.21751	down	chr18	-	32946660	32957301
BP312547	lincRNA-RBBP8-1	17.4167	4.1224	17.4167	up	lincRNA	581	chr18	+	20494080	20548814	overlap	NM_203291	RBBP8	DNA endonuclease RBBP8 isoform a	3.22082	1.68743	3.22082	up	chr18	+	20513838	20606449
AK289744	lincRNA-SUN2	-3.80601	-1.92828	3.80601	down	lincRNA	2725	chr22	-	39131913	39190148	downstream	NM_001002880	CBY1	protein chibby homolog 1 isoform b	-2.82762	-1.49959	2.82762	down	chr22	+	39052657	39069855
uc003yrb.2	CR933665	2.16376	1.11354	2.16376	up	UCSC_knowngene	5639	chr8	-	125474739	125486804	downstream	NM_017956	TRMT12	tRNA wybutosine-synthesizing protein 2 homolog	-2.95633	-1.56381	2.95633	down	chr8	+	125463047	125465266
BG679513	lincRNA-KCNT2-2	2.00837	1.00603	2.00837	up	lincRNA	868	chr1	+	193254821	193255677	upstream	NM_001173525	TROVE2	60 kDa SS-A/Ro ribonucleoprotein isoform 4	7.87458	2.9772	7.87458	up	chr1	+	193029003	193060906
ENST00000359838	RP3-337D23.3	-2.2976	-1.20013	2.2976	down	Ensembl	453	chr6	+	147480060	147502128	downstream	NM_139244	STXBP5	syntaxin-binding protein 5 isoform a	2.37511	1.24799	2.37511	up	chr6	+	147525507	147708707
NR_015395	LOC541471	2.08045	1.0569	2.08045	up	RefSeq_NR	809	chr2	-	112124590	112252692	downstream	NM_138621	BCL2L11	bcl-2-like protein 11 isoform 1	-2.52461	-1.33606	2.52461	down	chr2	+	111878490	111926022
AW361687	lincRNA-LNX2	-2.75784	-1.46354	2.75784	down	lincRNA	601	chr13	+	28003341	28423867	overlap	NM_145657	GSX1	GS homeobox 1	-2.06077	-1.04319	2.06077	down	chr13	+	28366779	28368089
uc002the.2	LOC541471	2.23191	1.15828	2.23191	up	UCSC_knowngene	1583	chr2	-	111965358	112252692	downstream	NM_138621	BCL2L11	bcl-2-like protein 11 isoform 1	-2.52461	-1.33606	2.52461	down	chr2	+	111878490	111926022
uc002msx.1	AX747405	-6.3389	-2.66423	6.3389	down	UCSC_knowngene	1801	chr19	+	12098431	12138553	upstream	NM_001080493	ZNF823	zinc finger protein 823	2.00587	1.00423	2.00587	up	chr19	-	11832079	11849760
ENST00000411804	RP1-91G5.3	-2.17384	-1.12024	2.17384	down	Ensembl	707	chr1	+	152346429	152417932	overlap	NM_016190	CRNN	cornulin	-4.19871	-2.06995	4.19871	down	chr1	-	152381718	152386750
ENST00000420707	RP1-14N1.2	-2.0138	-1.00992	2.0138	down	Ensembl	906	chr1	+	152161826	152313586	downstream	NM_016190	CRNN	cornulin	-4.19871	-2.06995	4.19871	down	chr1	-	152381718	152386750
AK095707		-2.75004	-1.45945	2.75004	down	misc_RNA	2984	chr16	+	81421429	81424413	downstream	NM_198390	CMIP	C-Maf-inducing protein isoform C-mip	-3.77744	-1.91741	3.77744	down	chr16	+	81478774	81745367
ENST00000426575	RP11-318C24.2	-2.26099	-1.17695	2.26099	down	Ensembl	657	chr1	-	175873897	175889649	upstream	NM_022457	RFWD2	E3 ubiquitin-protein ligase RFWD2 isoform a	7.0983	2.82747	7.0983	up	chr1	-	175913966	176176370
ENST00000457217	RP11-222A5.1	-2.61311	-1.38577	2.61311	down	Ensembl	1809	chr1	+	175846478	175849604	downstream	NM_022457	RFWD2	E3 ubiquitin-protein ligase RFWD2 isoform a	7.0983	2.82747	7.0983	up	chr1	-	175913966	176176370
ENST00000452336	RP4-530I15.6	-6.02748	-2.59155	6.02748	down	Ensembl	638	chr20	+	49262007	49276828	downstream	NM_015339	ADNP	activity-dependent neuroprotector homeobox	4.57071	2.19242	4.57071	up	chr20	-	49506882	49547527
chr13:20881350-20901600+	lincRNA-CRYL1	2.12363	1.08653	2.12363	up	lincRNA	20251	chr13	+	20881350	20901600	upstream	NM_021954	GJA3	gap junction alpha-3 protein	-14.0853	-3.81612	14.0853	down	chr13	-	20712394	20735183
AX747237	lincRNA-KIFC3	2.27272	1.18442	2.27272	up	lincRNA	3159	chr16	-	57792130	57896733	downstream	NM_170776	GPR97	probable G-protein coupled receptor 97	-2.00089	-1.00064	2.00089	down	chr16	+	57702156	57723290
uc001hor.1	CR625980	-2.75976	-1.46454	2.75976	down	UCSC_knowngene	1385	chr1	+	224622613	224709674	upstream	NM_015176	FBXO28	F-box only protein 28 isoform a	3.13059	1.64644	3.13059	up	chr1	+	224301790	224349749
AK094780	lincRNA-GALNTL2-1	7.39482	2.88652	7.39482	up	lincRNA	3105	chr3	+	15935568	16270147	upstream	NM_015199	ANKRD28	serine/threonine-protein phosphatase 6	2.37535	1.24814	2.37535	up	chr3	-	15708743	15901053
chr13:103635874-103659174+	lincRNA-SLC10A2-3	3.86164	1.94921	3.86164	up	lincRNA	23301	chr13	+	103635874	103659174	upstream	NM_017693	BIVM	basic immunoglobulin-like variable	5.05015	2.33633	5.05015	up	chr13	+	103451398	103493888
ENST00000424151	AC006378.3	-2.82937	-1.50048	2.82937	down	Ensembl	314	chr7	-	93594721	93597702	downstream	NM_021955	GNGT1	guanine nucleotide-binding protein G(T) subunit	9.35774	3.22616	9.35774	up	chr7	+	93535819	93540485
NR_027064	PLAC2	-2.73082	-1.44934	2.73082	down	RefSeq_NR	3693	chr19	-	5558179	5568005	upstream	NM_033643	RPL36	60S ribosomal protein L36	3.94024	1.97828	3.94024	up	chr19	+	5690271	5691678
BU664086	lincRNA-ENAH-1	-2.2633	-1.17843	2.2633	down	lincRNA	687	chr1	-	225860476	225861152	upstream	NM_003133	SRP9	signal recognition particle 9 kDa protein	3.77802	1.91763	3.77802	up	chr1	+	225965514	225978168
BC007632	lincRNA-RIMBP2-1	5.7371	2.52032	5.7371	up	lincRNA	3902	chr12	-	130916193	131200826	upstream	NM_198827	GPR133	probable G-protein coupled receptor 133	2.73218	1.45005	2.73218	up	chr12	+	131438451	131626008
uc001uiy.2	LOC338797	-4.96022	-2.3104	4.96022	down	UCSC_knowngene	1795	chr12	+	131832014	131852100	upstream	NM_198827	GPR133	probable G-protein coupled receptor 133	2.73218	1.45005	2.73218	up	chr12	+	131438451	131626008
AI948514	lincRNA-EML4	-2.02002	-1.01437	2.02002	down	lincRNA	444	chr2	-	42565867	42566311	downstream	NM_001145076	EML4	echinoderm microtubule-associated protein-like 4	3.81413	1.93135	3.81413	up	chr2	+	42396489	42559688
BC043564	lincRNA-KCNA2-1	-35.6463	-5.15568	35.6463	down	lincRNA	2022	chr1	-	111136202	111174096	downstream	NM_032414	PROK1	prokineticin-1 precursor	-2.98475	-1.57761	2.98475	down	chr1	+	110993787	110999976
chr1:109063527-109078202-	lincRNA-NBPF6-1	-2.36957	-1.24462	2.36957	down	lincRNA	14676	chr1	-	109063527	109078202	upstream	NM_001010883	FAM102B	hypothetical protein LOC284611	-2.15308	-1.1064	2.15308	down	chr1	+	109102970	109181949
ENST00000411846	RP11-483I13.4	-11.8126	-3.56225	11.8126	down	Ensembl	1570	chr1	+	108815564	108880475	downstream	NM_001010883	FAM102B	hypothetical protein LOC284611	-2.15308	-1.1064	2.15308	down	chr1	+	109102970	109181949
AI902205	lincRNA-OXGR1-2	-2.3905	-1.25731	2.3905	down	lincRNA	448	chr13	-	97778688	97779138	upstream	NM_207304	MBNL2	muscleblind-like protein 2 isoform 3	5.78408	2.53209	5.78408	up	chr13	+	97874573	98046374
ENST00000424605	RP11-125B21.2	2.53494	1.34195	2.53494	up	Ensembl	746	chr9	-	2535651	2570754	upstream	NM_001018056	VLDLR	very low-density lipoprotein receptor isoform b	3.05809	1.61263	3.05809	up	chr9	+	2621792	2654485
chr12:38862405-38887736-	lincRNA-ALG10B-4	2.13145	1.09183	2.13145	up	lincRNA	25332	chr12	-	38862405	38887736	downstream	NM_001013620	ALG10B	putative alpha-1,2-glucosyltransferase ALG10-B	2.02348	1.01684	2.02348	up	chr12	+	38710556	38723528
AA731927	lincRNA-CDCA7-2	2.03662	1.02617	2.03662	up	lincRNA	270	chr2	-	174255520	174255791	downstream	NM_016653	ZAK	mitogen-activated protein kinase kinase kinase	3.3566	1.747	3.3566	up	chr2	+	173940564	174132737
chr2:174248004-174261129+	lincRNA-SP3-2	-4.49564	-2.16853	4.49564	down	lincRNA	13126	chr2	+	174248004	174261129	upstream	NM_016653	ZAK	mitogen-activated protein kinase kinase kinase	3.3566	1.747	3.3566	up	chr2	+	173940564	174132737
AY034104	lincRNA-TACR1-2	2.37485	1.24783	2.37485	up	lincRNA	306	chr2	+	75186481	75252012	upstream	NM_000189	HK2	hexokinase-2	2.35059	1.23302	2.35059	up	chr2	+	75059781	75120481
AA781357	lincRNA-MAOA-3	-2.18499	-1.12763	2.18499	down	lincRNA	555	chrX	+	43223535	43224080	downstream	NM_000240	MAOA	amine oxidase [flavin-containing] A	-2.38272	-1.25261	2.38272	down	chrX	+	43515408	43606068
chr11:8215149-8227449-	lincRNA-RIC3	-2.09361	-1.06599	2.09361	down	lincRNA	12301	chr11	-	8215149	8227449	upstream	NM_030906	STK33	serine/threonine-protein kinase 33	-2.17234	-1.11925	2.17234	down	chr11	-	8413417	8615503
uc001vca.2	BC039553	-8.12089	-3.02164	8.12089	down	UCSC_knowngene	1141	chr13	-	48870650	48877797	downstream	NM_018283	NUDT15	probable 7,8-dihydro-8-oxoguanine triphosphatase	2.98433	1.57741	2.98433	up	chr13	+	48611702	48621282
BQ045000	lincRNA-NUDT15-1	2.55531	1.3535	2.55531	up	lincRNA	615	chr13	+	48578770	48611972	overlap	NM_018283	NUDT15	probable 7,8-dihydro-8-oxoguanine triphosphatase	2.98433	1.57741	2.98433	up	chr13	+	48611702	48621282
BF943620	lincRNA-ITM2B-2	2.52813	1.33807	2.52813	up	lincRNA	447	chr13	+	48738870	48739087	upstream	NM_018283	NUDT15	probable 7,8-dihydro-8-oxoguanine triphosphatase	2.98433	1.57741	2.98433	up	chr13	+	48611702	48621282
AI432427	lincRNA-CA6	2.13727	1.09577	2.13727	up	lincRNA	619	chr1	+	8906748	9229411	overlap	NM_001215	CA6	carbonic anhydrase 6 precursor	-3.19206	-1.67449	3.19206	down	chr1	+	9005921	9035148
AF191495	lincRNA-F11R	4.10745	2.03824	4.10745	up	lincRNA	2187	chr1	-	160967605	161008711	upstream	NM_001014443	USP21	ubiquitin carboxyl-terminal hydrolase 21	2.77109	1.47045	2.77109	up	chr1	+	161129253	161135516
CN413083	lincRNA-UFC1	4.63202	2.21164	4.63202	up	lincRNA	687	chr1	+	161106389	161107075	downstream	NM_001014443	USP21	ubiquitin carboxyl-terminal hydrolase 21	2.77109	1.47045	2.77109	up	chr1	+	161129253	161135516
ENST00000405924	RP3-451B15.3	3.77369	1.91598	3.77369	up	Ensembl	140	chr6	+	12319684	12319824	upstream	NM_002114	HIVEP1	zinc finger protein 40	4.0901	2.03214	4.0901	up	chr6	+	12012723	12165232
BX119188	lincRNA-NRG3-1	3.24972	1.70032	3.24972	up	lincRNA	308	chr10	+	82422704	82423002	upstream	NM_032372	DYDC2	DPY30 domain-containing protein 2	-8.62911	-3.10921	8.62911	down	chr10	+	82116557	82127829
ENST00000417795	AC034220.3	-2.05858	-1.04165	2.05858	down	Ensembl	1792	chr5	-	131646977	131705608	overlap	NM_003059	SLC22A4	solute carrier family 22 member 4	-14.8908	-3.89635	14.8908	down	chr5	+	131630144	131679899
uc010ayj.1	HBT8	-3.11433	-1.63892	3.11433	down	UCSC_knowngene	4100	chr15	+	25277533	25281633	upstream	NM_022807	SNRPN	small nuclear ribonucleoprotein-associated	-2.9544	-1.56286	2.9544	down	chr15	+	25068793	25223729
uc001yxc.2	SNURF-SNRPN	2.06544	1.04645	2.06544	up	UCSC_knowngene	2469	chr15	+	25226921	25266498	upstream	NM_022807	SNRPN	small nuclear ribonucleoprotein-associated	-2.9544	-1.56286	2.9544	down	chr15	+	25068793	25223729
uc001pwp.1	AK097820	-5.61785	-2.49002	5.61785	down	UCSC_knowngene	1784	chr11	+	119252519	119397374	upstream	NM_015645	C1QTNF5	complement C1q tumor necrosis factor-related	2.66747	1.41547	2.66747	up	chr11	-	119209651	119217383
uc001nng.1	AX746988	-6.08173	-2.60448	6.08173	down	UCSC_knowngene	2603	chr11	-	58701115	58825925	upstream	NM_001142519	FAM111A	hypothetical protein LOC63901	-2.05122	-1.03648	2.05122	down	chr11	+	58910317	58922511
AK129753		-2.12021	-1.0842	2.12021	down	misc_RNA	2007	chr11	-	86620031	86622038	upstream	NM_001168724	TMEM135	transmembrane protein 135 isoform 2	2.90501	1.53854	2.90501	up	chr11	+	86748885	87039876
AW387651	lincRNA-TFE3	-2.2146	-1.14705	2.2146	down	lincRNA	232	chrX	-	48903267	49031062	upstream	NM_001098406	GAGE12J	G antigen 12J	-4.35288	-2.12197	4.35288	down	chrX	+	49178515	49185866
ENST00000498979	AP003395.1	-4.2961	-2.10303	4.2961	down	Ensembl	2471	chr11	+	119252534	119371306	upstream	NM_015645	C1QTNF5	complement C1q tumor necrosis factor-related	2.66747	1.41547	2.66747	up	chr11	-	119209651	119217383
CK819477	lincRNA-APLN-2	-5.93216	-2.56856	5.93216	down	lincRNA	356	chrX	-	128809864	128812318	downstream	NM_000276	OCRL	inositol polyphosphate 5-phosphatase OCRL-1	2.41654	1.27294	2.41654	up	chrX	+	128674251	128726530
BF739255	lincRNA-APLN-1	2.15677	1.10888	2.15677	up	lincRNA	163	chrX	-	128835377	128835612	downstream	NM_000276	OCRL	inositol polyphosphate 5-phosphatase OCRL-1	2.41654	1.27294	2.41654	up	chrX	+	128674251	128726530
uc003cqw.1	AK096853	-5.35218	-2.42013	5.35218	down	UCSC_knowngene	2353	chr3	+	47205986	47285546	downstream	NM_015466	PTPN23	tyrosine-protein phosphatase non-receptor type	-2.05626	-1.04002	2.05626	down	chr3	+	47422490	47454931
DA955413	lincRNA-FAM65A-1	-17.2583	-4.10922	17.2583	down	lincRNA	562	chr16	+	67552113	67552675	downstream	NM_001013838	RLTPR	leucine-rich repeat-containing protein 16C	-7.00718	-2.80884	7.00718	down	chr16	+	67679029	67691472
BG210561	lincRNA-AGRP-2	-3.12553	-1.6441	3.12553	down	lincRNA	697	chr16	-	67551608	67552290	upstream	NM_001013838	RLTPR	leucine-rich repeat-containing protein 16C	-7.00718	-2.80884	7.00718	down	chr16	+	67679029	67691472
CN315150	lincRNA-FAM65A-3	-2.83035	-1.50098	2.83035	down	lincRNA	705	chr16	+	67536554	67537247	downstream	NM_001013838	RLTPR	leucine-rich repeat-containing protein 16C	-7.00718	-2.80884	7.00718	down	chr16	+	67679029	67691472
ENST00000419357	C6orf214	-2.37913	-1.25043	2.37913	down	Ensembl	264	chr6	-	30766430	30798436	upstream	NM_001010909	MUC21	mucin-21 precursor	-14.2611	-3.83402	14.2611	down	chr6	+	30951484	30957675
AK095243		4.05763	2.02064	4.05763	up	misc_RNA	2460	chr17	-	39805306	39807765	downstream	NM_002274	KRT13	keratin, type I cytoskeletal 13 isoform b	-3.71687	-1.89409	3.71687	down	chr17	-	39657232	39661865
AK094723		12.8915	3.68835	12.8915	up	misc_RNA	2466	chr17	+	39821817	39824283	upstream	NM_002274	KRT13	keratin, type I cytoskeletal 13 isoform b	-3.71687	-1.89409	3.71687	down	chr17	-	39657232	39661865
ENST00000512349	CTD-2313F11.2	-2.05774	-1.04106	2.05774	down	Ensembl	591	chr5	+	54350255	54350968	downstream	NM_001145734	CDC20B	cell division cycle protein 20 homolog B isoform	-21.0904	-4.39851	21.0904	down	chr5	-	54408798	54469005
ENST00000441363	RP11-398K22.12	-2.02104	-1.0151	2.02104	down	Ensembl	2403	chr6	+	73973081	74011124	upstream	NM_001160130	KCNQ5	potassium voltage-gated channel subfamily KQT	-2.31154	-1.20885	2.31154	down	chr6	+	73331570	73908573
BQ303919	lincRNA-RGNEF-3	-2.71661	-1.44181	2.71661	down	lincRNA	549	chr5	-	72797022	73644097	overlap	NM_032175	UTP15	U3 small nucleolar RNA-associated protein 15	2.26692	1.18073	2.26692	up	chr5	+	72861597	72877794
ENST00000340424	RP4-673D20.1	-2.89794	-1.53503	2.89794	down	Ensembl	1216	chr20	-	1645928	1688846	downstream	NM_018556	SIRPG	signal-regulatory protein gamma isoform 1	-4.84708	-2.27712	4.84708	down	chr20	-	1609797	1638425
chr14:54676002-54680773-	lincRNA-BMP4-2	-2.20844	-1.14303	2.20844	down	lincRNA	4772	chr14	-	54676002	54680773	upstream	NM_001130851	CDKN3	cyclin-dependent kinase inhibitor 3 isoform 2	3.8066	1.9285	3.8066	up	chr14	+	54863672	54886934
NR_027481	ZNF876P	3.28464	1.71574	3.28464	up	RefSeq_NR	2621	chr4	+	206388	249771	downstream	NM_001137608	ZNF732	zinc finger protein 732	-2.76088	-1.46513	2.76088	down	chr4	-	264463	289944
AK293062	lincRNA-GALNT1-2	5.02365	2.32874	5.02365	up	lincRNA	2194	chr18	+	33161002	33290012	overlap	NM_020474	GALNT1	polypeptide N-acetylgalactosaminyltransferase 1	4.54551	2.18444	4.54551	up	chr18	+	33234532	33291798
uc010dmv.2	DM004440	-3.65429	-1.86959	3.65429	down	UCSC_knowngene	109	chr18	-	33484780	33484889	downstream	NM_020474	GALNT1	polypeptide N-acetylgalactosaminyltransferase 1	4.54551	2.18444	4.54551	up	chr18	+	33234532	33291798
BM466146	lincRNA-ZNF396	-3.55756	-1.83089	3.55756	down	lincRNA	793	chr18	-	33026128	33026905	upstream	NM_020474	GALNT1	polypeptide N-acetylgalactosaminyltransferase 1	4.54551	2.18444	4.54551	up	chr18	+	33234532	33291798
uc003wyp.1	CR613267	-2.34668	-1.23062	2.34668	down	UCSC_knowngene	2275	chr8	+	17942376	17955126	downstream	NM_001160179	NAT1	arylamine N-acetyltransferase 1 isoform a	-12.0841	-3.59503	12.0841	down	chr8	+	18027970	18081198
EU831898	lincRNA-RPL29	-5.59124	-2.48317	5.59124	down	lincRNA	3142	chr3	-	51965892	52258329	overlap	NM_015407	ABHD14A	abhydrolase domain-containing protein 14A	-2.48615	-1.31391	2.48615	down	chr3	+	52009041	52015216
NR_024279	FLJ37453	-3.13715	-1.64946	3.13715	down	RefSeq_NR	2732	chr1	-	16160709	16174642	upstream	NM_004431	EPHA2	ephrin type-A receptor 2 precursor	-2.55448	-1.35303	2.55448	down	chr1	-	16450831	16482582
ENST00000426284	AC096772.4	2.2777	1.18758	2.2777	up	Ensembl	444	chr2	+	208546313	208546757	downstream	NM_152523	CCNYL1	cyclin-Y-like protein 1 isoform 2	2.13668	1.09537	2.13668	up	chr2	+	208576263	208620896
ENST00000429730	AC079767.4	-9.10238	-3.18624	9.10238	down	Ensembl	492	chr2	+	208527098	208531748	downstream	NM_152523	CCNYL1	cyclin-Y-like protein 1 isoform 2	2.13668	1.09537	2.13668	up	chr2	+	208576263	208620896
NR_015367	LOC550643	-2.46106	-1.29928	2.46106	down	RefSeq_NR	722	chrX	+	56755717	56844002	upstream	NM_013444	UBQLN2	ubiquilin-2	3.15642	1.65829	3.15642	up	chrX	+	56590025	56593443
ENST00000374922	RP11-622K12.1	-3.35039	-1.74433	3.35039	down	Ensembl	1529	chrX	+	56755691	56844813	upstream	NM_013444	UBQLN2	ubiquilin-2	3.15642	1.65829	3.15642	up	chrX	+	56590025	56593443
BI495452	lincRNA-KLF8-1	-7.73904	-2.95215	7.73904	down	lincRNA	600	chrX	-	56522481	56523074	upstream	NM_013444	UBQLN2	ubiquilin-2	3.15642	1.65829	3.15642	up	chrX	+	56590025	56593443
ENST00000432147	RP4-735C1.5	6.9127	2.78925	6.9127	up	Ensembl	355	chr1	-	110353265	110353620	upstream	NM_033088	FAM40A	hypothetical protein LOC85369	-2.34373	-1.22881	2.34373	down	chr1	+	110577240	110597263
NR_002766	MEG3	4.31717	2.11009	4.31717	up	RefSeq_NR	1595	chr14	+	101292444	101327358	upstream	NM_024515	WDR25	WD repeat-containing protein 25	-3.77085	-1.91489	3.77085	down	chr14	+	100842832	100996640
NR_033358	MEG3	2.76502	1.46729	2.76502	up	RefSeq_NR	1735	chr14	+	101292444	101327358	upstream	NM_024515	WDR25	WD repeat-containing protein 25	-3.77085	-1.91489	3.77085	down	chr14	+	100842832	100996640
CD174643	lincRNA-AMOTL1-2	-2.28722	-1.19359	2.28722	down	lincRNA	690	chr11	+	94380374	94384794	upstream	NM_017704	ANKRD49	ankyrin repeat domain-containing protein 49	-2.06815	-1.04834	2.06815	down	chr11	+	94227152	94232744
uc002uwa.2	AOX2	3.12505	1.64388	3.12505	up	UCSC_knowngene	978	chr2	+	201635394	201658962	downstream	NM_001142355	NIF3L1	NIF3-like protein 1 isoform 2	2.62761	1.39375	2.62761	up	chr2	+	201754049	201768655
AX747492	lincRNA-HFE2	2.0936	1.06599	2.0936	up	lincRNA	4510	chr1	+	145209144	146424095	overlap	NM_144698	ANKRD35	ankyrin repeat domain-containing protein 35	-13.7318	-3.77945	13.7318	down	chr1	+	145549208	145568526
CU691912	lincRNA-PRR14	-3.23083	-1.6919	3.23083	down	lincRNA	1160	chr16	-	30593955	30739049	upstream	NM_014771	RNF40	E3 ubiquitin-protein ligase BRE1B isoform 1	-2.15322	-1.10649	2.15322	down	chr16	+	30773629	30786538
AL137390	lincRNA-NKAIN3	36.9922	5.20915	36.9922	up	lincRNA	1202	chr8	+	62791440	62798121	upstream	NM_001164754	ASPH	aspartyl/asparaginyl beta-hydroxylase isoform j	5.00855	2.32439	5.00855	up	chr8	-	62536268	62627199
chr17:72383376-72409968-	lincRNA-GPR142	-3.23104	-1.692	3.23104	down	lincRNA	26593	chr17	-	72383376	72409968	downstream	NM_181790	GPR142	probable G-protein coupled receptor 142	3.265	1.70708	3.265	up	chr17	+	72363644	72368739
AK131003		20.0137	4.32291	20.0137	up	misc_RNA	689	chr5	+	134973225	134973914	downstream	NM_012159	FBXL21	F-box/LRR-repeat protein 21	-5.49322	-2.45765	5.49322	down	chr5	+	135266005	135277367
AA666059	lincRNA-ERC1	5.10967	2.35323	5.10967	up	lincRNA	395	chr12	-	1650285	1650679	upstream	NM_030775	WNT5B	protein Wnt-5b precursor	7.82633	2.96834	7.82633	up	chr12	+	1726221	1756377
ENST00000452496	ASS1P12	-15.7786	-3.9799	15.7786	down	Ensembl	1227	chr9	+	32945993	32947220	downstream	NM_001497	B4GALT1	beta-1,4-galactosyltransferase 1	4.31346	2.10885	4.31346	up	chr9	-	33110638	33167356
ENST00000512710	AL359643.3	-3.29087	-1.71847	3.29087	down	Ensembl	3273	chr6	-	5031989	5054657	downstream	NM_001143970	CDYL	chromodomain Y-like protein isoform d	2.2998	1.20151	2.2998	up	chr6	+	4836331	4955778
AF289584	lincRNA-NKD1	-4.22266	-2.07815	4.22266	down	lincRNA	2142	chr16	+	50369047	50668127	downstream	NM_153337	SNX20	sorting nexin-20 isoform 2	-2.24952	-1.16962	2.24952	down	chr16	-	50700210	50715264
NR_026938	LOC221442	-3.19809	-1.67721	3.19809	down	RefSeq_NR	4585	chr6	+	41068772	41108567	downstream	NM_018965	TREM2	triggering receptor expressed on myeloid cells 2	12.1618	3.60429	12.1618	up	chr6	-	41126245	41130922
uc003wyp.1	CR613267	-2.34668	-1.23062	2.34668	down	UCSC_knowngene	2275	chr8	+	17942376	17955126	downstream	NM_001160172	NAT1	arylamine N-acetyltransferase 1 isoform a	2.7608	1.46509	2.7608	up	chr8	+	18067617	18081198
BC045813		12.0152	3.58679	12.0152	up	RNAdb	1271	chr9	-	96938888	96966848	upstream	NM_032558	HIATL1	hippocampus abundant transcript-like 1	2.78366	1.47698	2.78366	up	chr9	+	97136832	97223202
NR_024149	MEG8	-5.5031	-2.46024	5.5031	down	RefSeq_NR	501	chr14	+	101361106	101373305	upstream	NM_003836	DLK1	protein delta homolog 1 precursor	-2.25759	-1.17478	2.25759	down	chr14	+	101193201	101201467
ENST00000442197	AL132709.9	2.2077	1.14254	2.2077	up	Ensembl	625	chr14	+	101427363	101433377	upstream	NM_003836	DLK1	protein delta homolog 1 precursor	-2.25759	-1.17478	2.25759	down	chr14	+	101193201	101201467
ENST00000414488	AL132709.5	4.09434	2.03363	4.09434	up	Ensembl	800	chr14	+	101415314	101424887	upstream	NM_003836	DLK1	protein delta homolog 1 precursor	-2.25759	-1.17478	2.25759	down	chr14	+	101193201	101201467
AF422192		2.61487	1.38674	2.61487	up	misc_RNA	1422	chr14	+	101359264	101360646	upstream	NM_003836	DLK1	protein delta homolog 1 precursor	-2.25759	-1.17478	2.25759	down	chr14	+	101193201	101201467
NR_002766	MEG3	4.31717	2.11009	4.31717	up	RefSeq_NR	1595	chr14	+	101292444	101327358	upstream	NM_003836	DLK1	protein delta homolog 1 precursor	-2.25759	-1.17478	2.25759	down	chr14	+	101193201	101201467
NR_033358	MEG3	2.76502	1.46729	2.76502	up	RefSeq_NR	1735	chr14	+	101292444	101327358	upstream	NM_003836	DLK1	protein delta homolog 1 precursor	-2.25759	-1.17478	2.25759	down	chr14	+	101193201	101201467
BC036602		-2.75635	-1.46276	2.75635	down	RNAdb	1336	chr14	+	101319252	101320560	upstream	NM_003836	DLK1	protein delta homolog 1 precursor	-2.25759	-1.17478	2.25759	down	chr14	+	101193201	101201467
AI948514	lincRNA-EML4	-2.02002	-1.01437	2.02002	down	lincRNA	444	chr2	-	42565867	42566311	upstream	NM_020744	MTA3	metastasis-associated protein MTA3	2.02957	1.02117	2.02957	up	chr2	+	42795670	42936353
uc003wyp.1	CR613267	-2.34668	-1.23062	2.34668	down	UCSC_knowngene	2275	chr8	+	17942376	17955126	downstream	NM_001160175	NAT1	arylamine N-acetyltransferase 1 isoform b	-2.08716	-1.06154	2.08716	down	chr8	+	18067617	18081198
ENST00000444862	AP005273.1	-2.93067	-1.55123	2.93067	down	Ensembl	522	chr11	+	64268324	64272858	upstream	NM_032251	CCDC88B	coiled-coil domain-containing protein 88B	-11.7564	-3.55538	11.7564	down	chr11	+	64107689	64125006
ENST00000509603	AC104073.1	-15.2918	-3.93469	15.2918	down	Ensembl	2001	chr7	-	64600748	65235797	downstream	NM_021148	ZNF273	zinc finger protein 273	2.11104	1.07795	2.11104	up	chr7	+	64363619	64391955
CU691912	lincRNA-PRR14	-3.23083	-1.6919	3.23083	down	lincRNA	1160	chr16	-	30593955	30739049	upstream	NM_001142544	CTF1	cardiotrophin-1 isoform 2	-2.38236	-1.25239	2.38236	down	chr16	+	30907927	30914881
AL137390	lincRNA-NKAIN3	36.9922	5.20915	36.9922	up	lincRNA	1202	chr8	+	62791440	62798121	upstream	NM_032466	ASPH	aspartyl/asparaginyl beta-hydroxylase isoform c	-16.196	-4.01757	16.196	down	chr8	-	62536268	62627199
ENST00000451906	AC093038.1	2.68429	1.42454	2.68429	up	Ensembl	497	chr2	-	187126149	187126646	upstream	NM_018471	ZC3H15	zinc finger CCCH domain-containing protein 15	2.19485	1.13412	2.19485	up	chr2	+	187350884	187374087
AK289744	lincRNA-SUN2	-3.80601	-1.92828	3.80601	down	lincRNA	2725	chr22	-	39131913	39190148	upstream	NM_004900	APOBEC3B	probable DNA dC->dU-editing enzyme APOBEC-3B	4.38813	2.13361	4.38813	up	chr22	+	39378404	39388783
BP312547	lincRNA-RBBP8-1	17.4167	4.1224	17.4167	up	lincRNA	581	chr18	+	20494080	20548814	overlap	NM_203292	RBBP8	DNA endonuclease RBBP8 isoform b	7.14779	2.8375	7.14779	up	chr18	+	20513838	20606449
DR007897	lincRNA-POU2AF1	-2.4789	-1.3097	2.4789	down	lincRNA	521	chr11	-	111320592	111322036	upstream	NM_001177562	PPP2R1B	serine/threonine-protein phosphatase 2A 65 kDa	2.69493	1.43025	2.69493	up	chr11	-	111608604	111637169
uc002uwa.2	AOX2	3.12505	1.64388	3.12505	up	UCSC_knowngene	978	chr2	+	201635394	201658962	downstream	NM_001142356	NIF3L1	NIF3-like protein 1 isoform 3	2.28851	1.19441	2.28851	up	chr2	+	201756640	201768655
chr5:78812894-78817242+	lincRNA-PAPD4	-9.59936	-3.26294	9.59936	down	lincRNA	4349	chr5	+	78812894	78817242	downstream	NM_001114394	PAPD4	poly(A) RNA polymerase GLD2	4.90278	2.2936	4.90278	up	chr5	+	78908242	78982471
uc002vje.1	BC038542	2.34572	1.23003	2.34572	up	UCSC_knowngene	1008	chr2	-	219765535	219795358	downstream	NM_006522	WNT6	protein Wnt-6 precursor	-9.37347	-3.22858	9.37347	down	chr2	+	219724545	219738954
ENST00000415252	RP1-3D11.2	-2.31567	-1.21143	2.31567	down	Ensembl	457	chrX	-	106756212	106789051	downstream	NM_173494	CXorf41	hypothetical protein LOC139212	-50.4561	-5.65696	50.4561	down	chrX	+	106449861	106487473
AW364455	lincRNA-C16orf45	-2.6158	-1.38725	2.6158	down	lincRNA	535	chr16	+	15462374	16047393	overlap	NM_144600	FOPNL	lisH domain-containing protein FOPNL	3.37604	1.75533	3.37604	up	chr16	-	15959576	15982447
DC428746	lincRNA-ARHGAP15	-2.31454	-1.21073	2.31454	down	lincRNA	577	chr2	+	143828536	143986326	upstream	NM_003937	KYNU	kynureninase isoform a	3.99714	1.99897	3.99714	up	chr2	+	143635194	143799885
chr4:53257568-53279668-	lincRNA-SPATA18-1	-2.38641	-1.25484	2.38641	down	lincRNA	22101	chr4	-	53257568	53279668	downstream	NM_145263	SPATA18	mitochondria-eating protein	-3.02776	-1.59825	3.02776	down	chr4	+	52917592	52963458
AK097798	lincRNA-ZNF676	5.45844	2.44849	5.45844	up	lincRNA	2091	chr19	-	22361892	23158666	downstream	NM_033468	ZNF257	zinc finger protein 257	-3.80861	-1.92926	3.80861	down	chr19	+	22235265	22273903
ENST00000496067	RP11-180K7.1	-19.6455	-4.29613	19.6455	down	Ensembl	2632	chr3	+	112521423	112541911	downstream	NM_138485	GTPBP8	GTP-binding protein 8 isoform 2	2.32348	1.21629	2.32348	up	chr3	+	112709799	112720221
ENST00000511951	RP11-371F15.3	-3.6474	-1.86687	3.6474	down	Ensembl	282	chr4	-	139741110	139933800	upstream	NM_012118	CCRN4L	nocturnin	4.12549	2.04456	4.12549	up	chr4	+	139936942	139967095
AK128058	lincRNA-ZNF532	2.4904	1.31637	2.4904	up	lincRNA	6183	chr18	+	56529831	56653197	upstream	NM_006785	MALT1	mucosa-associated lymphoid tissue lymphoma	2.61457	1.38658	2.61457	up	chr18	+	56338617	56417370
CN413083	lincRNA-UFC1	4.63202	2.21164	4.63202	up	lincRNA	687	chr1	+	161106389	161107075	downstream	NM_001035512	SDHC	succinate dehydrogenase cytochrome b560 subunit,	2.1254	1.08774	2.1254	up	chr1	+	161284165	161334535
AF191495	lincRNA-F11R	4.10745	2.03824	4.10745	up	lincRNA	2187	chr1	-	160967605	161008711	upstream	NM_001035512	SDHC	succinate dehydrogenase cytochrome b560 subunit,	2.1254	1.08774	2.1254	up	chr1	+	161284165	161334535
ENST00000426575	RP11-318C24.2	-2.26099	-1.17695	2.26099	down	Ensembl	657	chr1	-	175873897	175889649	downstream	NM_003285	TNR	tenascin-R precursor	2.24636	1.16759	2.24636	up	chr1	-	175291934	175712752
ENST00000457217	RP11-222A5.1	-2.61311	-1.38577	2.61311	down	Ensembl	1809	chr1	+	175846478	175849604	upstream	NM_003285	TNR	tenascin-R precursor	2.24636	1.16759	2.24636	up	chr1	-	175291934	175712752
AX747237	lincRNA-KIFC3	2.27272	1.18442	2.27272	up	lincRNA	3159	chr16	-	57792130	57896733	upstream	NM_001135639	CNGB1	cyclic nucleotide-gated cation channel beta-1	-3.68368	-1.88115	3.68368	down	chr16	-	57988579	58005020
uc010dmv.2	DM004440	-3.65429	-1.86959	3.65429	down	UCSC_knowngene	109	chr18	-	33484780	33484889	upstream	NM_001099406	SLC39A6	zinc transporter ZIP6 isoform 2	8.96921	3.16498	8.96921	up	chr18	-	33690962	33709357
ENST00000511512	RP11-71E19.1	-3.4917	-1.80393	3.4917	down	Ensembl	501	chr3	+	125985638	126010122	upstream	NM_001012337	ROPN1B	ropporin-1B	-51.4423	-5.68488	51.4423	down	chr3	+	125688027	125702296
BC002759	lincRNA-SLC48A1	-2.29143	-1.19625	2.29143	down	lincRNA	1041	chr12	+	48165369	48176533	overlap	NM_017842	SLC48A1	heme transporter HRG1	-2.82887	-1.50023	2.82887	down	chr12	+	48166966	48176536
AK299029	lincRNA-RAPGEF3	-4.06608	-2.02364	4.06608	down	lincRNA	2776	chr12	-	48131323	48164823	upstream	NM_017842	SLC48A1	heme transporter HRG1	-2.82887	-1.50023	2.82887	down	chr12	+	48166966	48176536
ENST00000420752	RP11-507K13.4	8.97264	3.16553	8.97264	up	Ensembl	1053	chr10	+	50979886	50981345	upstream	NM_001142933	CHAT	choline O-acetyltransferase isoform 3	-2.15645	-1.10865	2.15645	down	chr10	+	50822082	50873150
ENST00000505987	HSP90AA4P	2.83996	1.50587	2.83996	up	Ensembl	2173	chr4	+	88812994	88815167	downstream	NM_000582	SPP1	osteopontin isoform b precursor	8.99273	3.16876	8.99273	up	chr4	+	88896801	88904563
DR007897	lincRNA-POU2AF1	-2.4789	-1.3097	2.4789	down	lincRNA	521	chr11	-	111320592	111322036	upstream	NM_207430	C11orf88	hypothetical protein LOC399949 isoform 1	-2.95963	-1.56542	2.95963	down	chr11	+	111385509	111407756
DA955413	lincRNA-FAM65A-1	-17.2583	-4.10922	17.2583	down	lincRNA	562	chr16	+	67552113	67552675	upstream	NM_000196	HSD11B2	corticosteroid 11-beta-dehydrogenase isozyme 2	-2.11617	-1.08146	2.11617	down	chr16	+	67465035	67471454
BG210561	lincRNA-AGRP-2	-3.12553	-1.6441	3.12553	down	lincRNA	697	chr16	-	67551608	67552290	downstream	NM_000196	HSD11B2	corticosteroid 11-beta-dehydrogenase isozyme 2	-2.11617	-1.08146	2.11617	down	chr16	+	67465035	67471454
CN315150	lincRNA-FAM65A-3	-2.83035	-1.50098	2.83035	down	lincRNA	705	chr16	+	67536554	67537247	upstream	NM_000196	HSD11B2	corticosteroid 11-beta-dehydrogenase isozyme 2	-2.11617	-1.08146	2.11617	down	chr16	+	67465035	67471454
ENST00000424719	RP5-884C9.3	2.81108	1.49112	2.81108	up	Ensembl	338	chr1	-	38546247	38546585	downstream	NM_001031740	MANEAL	glycoprotein endo-alpha-1,2-mannosidase-like	4.07301	2.02609	4.07301	up	chr1	+	38259773	38267278
BF116112	lincRNA-C5orf53-1	2.1072	1.07533	2.1072	up	lincRNA	588	chr5	-	139527790	139528378	downstream	NM_001007189	C5orf53	IgA-inducing protein homolog precursor	-2.3934	-1.25906	2.3934	down	chr5	+	139505520	139508391
DB525109	lincRNA-CENPW-1	-2.34052	-1.22683	2.34052	down	lincRNA	483	chr6	+	126397593	126398803	downstream	NM_001012507	CENPW	centromere protein W	4.98307	2.31704	4.98307	up	chr6	+	126661252	126669754
chr9:81993205-81999034-	lincRNA-PSAT1-1	-4.91415	-2.29694	4.91415	down	lincRNA	5830	chr9	-	81993205	81999034	upstream	NM_007005	TLE4	transducin-like enhancer protein 4	-2.25666	-1.17419	2.25666	down	chr9	+	82186877	82341656
DN918055	lincRNA-SGIP1	2.4893	1.31574	2.4893	up	lincRNA	399	chr1	+	66890612	67423817	overlap	NM_032291	SGIP1	SH3-containing GRB2-like protein 3-interacting	2.97733	1.57402	2.97733	up	chr1	+	66999824	67210768
DN918054	lincRNA-PDE4B	-2.1129	-1.07922	2.1129	down	lincRNA	400	chr1	-	66890612	67423817	overlap	NM_032291	SGIP1	SH3-containing GRB2-like protein 3-interacting	2.97733	1.57402	2.97733	up	chr1	+	66999824	67210768
chr6:34524172-34539872+	lincRNA-C6orf106	2.36413	1.24131	2.36413	up	lincRNA	15701	chr6	+	34524172	34539872	upstream	NM_012391	SPDEF	SAM pointed domain-containing Ets transcription	-4.69754	-2.2319	4.69754	down	chr6	-	34505579	34524091
AK131003		20.0137	4.32291	20.0137	up	misc_RNA	689	chr5	+	134973225	134973914	downstream	NM_145282	SLC25A48	solute carrier family 25 member 48	-2.63714	-1.39897	2.63714	down	chr5	+	135170364	135224326
chr2:102880643-102894318+	lincRNA-IL1RL1	2.73885	1.45357	2.73885	up	lincRNA	13676	chr2	+	102880643	102894318	downstream	NM_016232	IL1RL1	interleukin-1 receptor-like 1 isoform 1	-3.19428	-1.67549	3.19428	down	chr2	+	102927961	102968497
HIT000395572		-3.29066	-1.71838	3.29066	down	H-invDB	354	chr1	-	200443206	200443559	upstream	NM_203459	CAMSAP1L1	calmodulin-regulated spectrin-associated protein	5.72422	2.51708	5.72422	up	chr1	+	200708685	200829831
ENST00000439110	PTMAP6	2.64796	1.40488	2.64796	up	Ensembl	327	chr20	-	55275892	55276570	downstream	NM_001033521	CSTF1	cleavage stimulation factor subunit 1	2.12256	1.0858	2.12256	up	chr20	+	54967426	54979582
uc001xsz.2	BC038792	-9.08337	-3.18323	9.08337	down	UCSC_knowngene	364	chr14	-	77514515	77547598	upstream	NM_020431	TMEM63C	transmembrane protein 63C	-6.64407	-2.73207	6.64407	down	chr14	+	77648101	77725838
DA335757	lincRNA-ZDHHC22	11.1113	3.47396	11.1113	up	lincRNA	597	chr14	+	77571996	77691805	overlap	NM_020431	TMEM63C	transmembrane protein 63C	-6.64407	-2.73207	6.64407	down	chr14	+	77648101	77725838
DB307107	lincRNA-LRRC32-2	-2.01434	-1.01031	2.01434	down	lincRNA	548	chr11	+	76336505	76337049	downstream	NM_018367	ACER3	alkaline ceramidase 3	2.3819	1.25211	2.3819	up	chr11	+	76571916	76734850
AA935188	lincRNA-MCM9	-4.23578	-2.08263	4.23578	down	lincRNA	178	chr6	+	119110701	119110864	upstream	NM_002667	PLN	cardiac phospholamban	-5.18514	-2.37438	5.18514	down	chr6	+	118869441	118881587
ENST00000442418	RP11-86H7.1	-2.68842	-1.42676	2.68842	down	Ensembl	748	chr1	-	95104016	95285652	upstream	NM_152487	TMEM56	transmembrane protein 56	-18.0812	-4.17642	18.0812	down	chr1	+	95582893	95663161
chr1:95438681-95440571-	lincRNA-CNN3	-2.5762	-1.36525	2.5762	down	lincRNA	1891	chr1	-	95438681	95440571	upstream	NM_152487	TMEM56	transmembrane protein 56	-18.0812	-4.17642	18.0812	down	chr1	+	95582893	95663161
chr16:84296674-84307824+	lincRNA-WFDC1	-2.65977	-1.4113	2.65977	down	lincRNA	11151	chr16	+	84296674	84307824	upstream	NM_019065	NECAB2	N-terminal EF-hand calcium-binding protein 2	2.76262	1.46604	2.76262	up	chr16	+	84002236	84036379
ENST00000439207	RP11-568A7.2	-2.73248	-1.45021	2.73248	down	Ensembl	205	chr6	+	167655378	167659404	downstream	NM_031949	TTLL2	probable tubulin polyglutamylase TTLL2	4.09902	2.03528	4.09902	up	chr6	+	167738573	167756177
BX647686	lincRNA-CCR6	-27.5941	-4.78629	27.5941	down	lincRNA	5327	chr6	+	167412892	167552626	downstream	NM_031949	TTLL2	probable tubulin polyglutamylase TTLL2	4.09902	2.03528	4.09902	up	chr6	+	167738573	167756177
ENST00000454185	RP11-568A7.3	-24.696	-4.62621	24.696	down	Ensembl	579	chr6	-	167650995	167653968	upstream	NM_031949	TTLL2	probable tubulin polyglutamylase TTLL2	4.09902	2.03528	4.09902	up	chr6	+	167738573	167756177
NR_015395	LOC541471	2.08045	1.0569	2.08045	up	RefSeq_NR	809	chr2	-	112124590	112252692	downstream	NM_207002	BCL2L11	bcl-2-like protein 11 isoform 9	6.34247	2.66505	6.34247	up	chr2	+	111878490	111886423
uc002the.2	LOC541471	2.23191	1.15828	2.23191	up	UCSC_knowngene	1583	chr2	-	111965358	112252692	downstream	NM_207002	BCL2L11	bcl-2-like protein 11 isoform 9	6.34247	2.66505	6.34247	up	chr2	+	111878490	111886423
CU444927	lincRNA-MYEOV-2	2.34387	1.22889	2.34387	up	lincRNA	742	chr11	-	69059868	69182303	upstream	NM_053056	CCND1	G1/S-specific cyclin-D1	3.78768	1.92131	3.78768	up	chr11	+	69455872	69469242
AL538236	lincRNA-MAGEE1-1	2.79156	1.48107	2.79156	up	lincRNA	1127	chrX	+	75404868	75405949	downstream	NM_020932	MAGEE1	melanoma-associated antigen E1	-5.80852	-2.53817	5.80852	down	chrX	+	75648045	75651746
ENST00000420752	RP11-507K13.4	8.97264	3.16553	8.97264	up	Ensembl	1053	chr10	+	50979886	50981345	upstream	NM_001142929	CHAT	choline O-acetyltransferase isoform 1	3.99739	1.99906	3.99739	up	chr10	+	50822082	50873150
CD048049	lincRNA-RPL39L-1	-3.55805	-1.83109	3.55805	down	lincRNA	923	chr3	-	186838735	186898696	upstream	NM_001031849	MASP1	mannan-binding lectin serine protease 1 isoform	-13.5854	-3.76398	13.5854	down	chr3	-	186964141	187009810
chr3:187039181-187056506-	lincRNA-MASP1	-10.5162	-3.39455	10.5162	down	lincRNA	17326	chr3	-	187039181	187056506	downstream	NM_001031849	MASP1	mannan-binding lectin serine protease 1 isoform	-13.5854	-3.76398	13.5854	down	chr3	-	186964141	187009810
BF511988	lincRNA-TOMM20-1	-2.93159	-1.55168	2.93159	down	lincRNA	521	chr1	+	235062091	235062598	downstream	NM_001161533	RBM34	RNA-binding protein 34 isoform 2	3.48311	1.80037	3.48311	up	chr1	-	235315802	235324571
chr8:82280811-82287539+	lincRNA-PMP2	-4.5325	-2.18031	4.5325	down	lincRNA	6729	chr8	+	82280811	82287539	downstream	NM_002677	PMP2	myelin P2 protein	-4.31066	-2.10791	4.31066	down	chr8	-	82352563	82359719
CV346902	lincRNA-TMEM45B-1	2.02248	1.01612	2.02248	up	lincRNA	589	chr11	+	129596130	129596709	upstream	NM_003658	BARX2	homeobox protein BarH-like 2	-2.88758	-1.52986	2.88758	down	chr11	+	129245880	129322174
ENST00000511090	AP003500.1	-3.69672	-1.88624	3.69672	down	Ensembl	973	chr11	-	129482019	129487164	downstream	NM_003658	BARX2	homeobox protein BarH-like 2	-2.88758	-1.52986	2.88758	down	chr11	+	129245880	129322174
CR748637	lincRNA-SLC9A9	2.74599	1.45733	2.74599	up	lincRNA	361	chr3	+	142871098	143101003	upstream	NM_004267	CHST2	carbohydrate sulfotransferase 2	-3.14507	-1.65309	3.14507	down	chr3	+	142838667	142841812
uc001nng.1	AX746988	-6.08173	-2.60448	6.08173	down	UCSC_knowngene	2603	chr11	-	58701115	58825925	upstream	NM_001142703	FAM111B	hypothetical protein LOC374393 isoform b	7.13701	2.83532	7.13701	up	chr11	+	58874657	58894888
BQ000389	lincRNA-C8orf38-1	-3.21689	-1.68567	3.21689	down	lincRNA	727	chr8	-	96112621	96115685	downstream	NM_017864	INTS8	integrator complex subunit 8	2.74819	1.45848	2.74819	up	chr8	+	95835533	95892721
uc003fux.1	AK128346	-3.09168	-1.62839	3.09168	down	UCSC_knowngene	2732	chr3	+	195426821	195438745	upstream	NM_001647	APOD	apolipoprotein D precursor	-5.18594	-2.37461	5.18594	down	chr3	-	195295572	195311076
AK126698		-2.55517	-1.35342	2.55517	down	RNAdb	3826	chr3	+	195442310	195446106	upstream	NM_001647	APOD	apolipoprotein D precursor	-5.18594	-2.37461	5.18594	down	chr3	-	195295572	195311076
ENST00000427165	RP11-499O7.5	-10.8503	-3.43966	10.8503	down	Ensembl	609	chr10	-	5164278	5177418	downstream	NM_003739	AKR1C3	aldo-keto reductase family 1 member C3	-7.05646	-2.81894	7.05646	down	chr10	+	5136567	5149878
DQ269985	lincRNA-AKR1C3-2	-10.4967	-3.39186	10.4967	down	lincRNA	972	chr10	+	5005636	5149693	overlap	NM_003739	AKR1C3	aldo-keto reductase family 1 member C3	-7.05646	-2.81894	7.05646	down	chr10	+	5136567	5149878
CN288152	lincRNA-SPINK5	-2.15001	-1.10434	2.15001	down	lincRNA	741	chr5	+	147329207	147329947	downstream	NM_001127698	SPINK5	serine protease inhibitor Kazal-type 5 isoform a	-7.94255	-2.9896	7.94255	down	chr5	+	147443534	147516925
ENST00000512710	AL359643.3	-3.29087	-1.71847	3.29087	down	Ensembl	3273	chr6	-	5031989	5054657	downstream	NM_001143971	CDYL	chromodomain Y-like protein isoform d	-2.31245	-1.20942	2.31245	down	chr6	+	4890225	4955778
ENST00000405197	AC064836.3	3.58106	1.84039	3.58106	up	Ensembl	704	chr2	-	203200746	203201450	downstream	NM_001005781	SUMO1	small ubiquitin-related modifier 1 isoform a	3.4375	1.78136	3.4375	up	chr2	-	203070902	203103322
chr2:202788106-202795396-	lincRNA-CDK15-2	-3.0226	-1.59579	3.0226	down	lincRNA	7291	chr2	-	202788106	202795396	upstream	NM_001005781	SUMO1	small ubiquitin-related modifier 1 isoform a	3.4375	1.78136	3.4375	up	chr2	-	203070902	203103322
AK097798	lincRNA-ZNF676	5.45844	2.44849	5.45844	up	lincRNA	2091	chr19	-	22361892	23158666	overlap	NM_001098626	ZNF98	zinc finger protein 98	2.76593	1.46776	2.76593	up	chr19	-	22573898	22605148
chr3:33273197-33275601+	lincRNA-FBXL2	-4.0375	-2.01346	4.0375	down	lincRNA	2405	chr3	+	33273197	33275601	upstream	NM_005508	CCR4	C-C chemokine receptor type 4	-6.4794	-2.69586	6.4794	down	chr3	+	32993065	32996403
uc003plc.3	SNHG5	-2.11345	-1.0796	2.11345	down	UCSC_knowngene	1078	chr6	-	86386725	86388440	downstream	NM_006372	SYNCRIP	heterogeneous nuclear ribonucleoprotein Q	2.75256	1.46077	2.75256	up	chr6	-	86323692	86353043
BQ302800	lincRNA-PRSS38	6.34033	2.66456	6.34033	up	lincRNA	740	chr1	-	227890324	228285713	upstream	NM_020435	GJC2	gap junction gamma-2 protein	-4.09866	-2.03515	4.09866	down	chr1	+	228337552	228347527
chr13:43764375-43778425-	lincRNA-DNAJC15	2.03656	1.02613	2.03656	up	lincRNA	14051	chr13	-	43764375	43778425	downstream	NM_001002264	EPSTI1	epithelial-stromal interaction protein 1 isoform	9.87309	3.3035	9.87309	up	chr13	-	43462121	43566377
DR007897	lincRNA-POU2AF1	-2.4789	-1.3097	2.4789	down	lincRNA	521	chr11	-	111320592	111322036	downstream	NM_198498	C11orf53	hypothetical protein LOC341032	2.42174	1.27605	2.42174	up	chr11	+	111126706	111156972
uc003xjb.2	BC034319	7.31918	2.87168	7.31918	up	UCSC_knowngene	837	chr8	+	32785487	32902372	upstream	NM_004495	NRG1	pro-neuregulin-1, membrane-bound isoform isoform	10.1868	3.34862	10.1868	up	chr8	+	32405727	32586136
ENST00000419514	RP11-366O17.2	26.337	4.71902	26.337	up	Ensembl	192	chr13	+	43385972	43386428	downstream	NM_001002264	EPSTI1	epithelial-stromal interaction protein 1 isoform	9.87309	3.3035	9.87309	up	chr13	-	43462121	43566377
ENST00000423943	RP11-48O20.4	-8.26514	-3.04704	8.26514	down	Ensembl	1113	chr1	+	159931013	159948851	downstream	NM_002857	PEX19	peroxisomal biogenesis factor 19 isoform a	4.92382	2.29978	4.92382	up	chr1	-	160246598	160254941
chrX:102236694-102253244-	lincRNA-RAB40AL-1	-2.54696	-1.34878	2.54696	down	lincRNA	16551	chrX	-	102236694	102253244	downstream	NM_001142530	BHLHB9	protein BHLHb9	-16.0576	-4.00518	16.0576	down	chrX	+	102000906	102007369
AX747492	lincRNA-HFE2	2.0936	1.06599	2.0936	up	lincRNA	4510	chr1	+	145209144	146424095	overlap	NM_001097612	GPR89A	Golgi pH regulator A isoform 1	3.22433	1.689	3.22433	up	chr1	-	145764594	145827103
chr5:126903301-126920351-	lincRNA-PRRC1	-12.0687	-3.59319	12.0687	down	lincRNA	17051	chr5	-	126903301	126920351	downstream	NM_032446	MEGF10	multiple epidermal growth factor-like domains	4.48275	2.16438	4.48275	up	chr5	+	126626455	126796910
CB157495	lincRNA-NPVF-2	-2.3816	-1.25193	2.3816	down	lincRNA	608	chr7	-	25988420	25989023	upstream	NM_016587	CBX3	chromobox protein homolog 3	4.00696	2.00251	4.00696	up	chr7	+	26241323	26253227
ENST00000380334	CA5BP	2.244	1.16607	2.244	up	Ensembl	889	chrX	+	15693668	15721472	upstream	NM_021804	ACE2	angiotensin-converting enzyme 2 precursor	-3.08824	-1.62678	3.08824	down	chrX	-	15579155	15620192
AK092616		-2.14753	-1.10268	2.14753	down	misc_RNA	1806	chrX	+	15749866	15751672	upstream	NM_021804	ACE2	angiotensin-converting enzyme 2 precursor	-3.08824	-1.62678	3.08824	down	chrX	-	15579155	15620192
chr1:231020477-231031277+	lincRNA-TTC13	-2.04212	-1.03006	2.04212	down	lincRNA	10801	chr1	+	231020477	231031277	upstream	NM_006615	CAPN9	calpain-9 isoform 1	-5.16377	-2.36843	5.16377	down	chr1	+	230883129	230937518
uc001nng.1	AX746988	-6.08173	-2.60448	6.08173	down	UCSC_knowngene	2603	chr11	-	58701115	58825925	upstream	NM_001142704	FAM111B	hypothetical protein LOC374393 isoform b	3.32503	1.73337	3.32503	up	chr11	+	58874657	58894888
ENST00000411804	RP1-91G5.3	-2.17384	-1.12024	2.17384	down	Ensembl	707	chr1	+	152346429	152417932	downstream	NM_178430	LCE2D	late cornified envelope protein 2D	-4.45602	-2.15576	4.45602	down	chr1	+	152635871	152637135
DA223008	lincRNA-PARP11-3	-3.42893	-1.77776	3.42893	down	lincRNA	495	chr12	-	4361900	4384231	upstream	NM_001130862	RAD51AP1	RAD51-associated protein 1 isoform a	8.80907	3.13899	8.80907	up	chr12	+	4647949	4669213
DN920247	lincRNA-SCARB2	5.11447	2.35458	5.11447	up	lincRNA	527	chr4	-	77102106	77155656	upstream	NM_001136570	FAM47E	hypothetical protein LOC100129583	-44.9084	-5.48891	44.9084	down	chr4	+	77172852	77204929
AK124936	lincRNA-FAM47E	-81.9836	-6.35726	81.9836	down	lincRNA	1624	chr4	+	77135192	77204933	overlap	NM_001136570	FAM47E	hypothetical protein LOC100129583	-44.9084	-5.48891	44.9084	down	chr4	+	77172852	77204929
uc002vga.1	AX747067	2.36877	1.24414	2.36877	up	UCSC_knowngene	2348	chr2	+	217079049	217081397	upstream	NM_021141	XRCC5	X-ray repair cross-complementing protein 5	3.715	1.89336	3.715	up	chr2	+	216974019	217071016
NR_026769	PPBPL2	-2.56244	-1.35752	2.56244	down	RefSeq_NR	1362	chr4	-	74919754	74921116	downstream	NM_002620	PF4V1	platelet factor 4 variant	-4.58551	-2.19708	4.58551	down	chr4	+	74719012	74720198
AI609057	lincRNA-LUZP6-1	-2.77858	-1.47435	2.77858	down	lincRNA	417	chr7	+	135585964	135586381	upstream	NM_015135	NUP205	nuclear pore complex protein Nup205	4.60566	2.20341	4.60566	up	chr7	+	135242661	135333499
AF191495	lincRNA-F11R	4.10745	2.03824	4.10745	up	lincRNA	2187	chr1	-	160967605	161008711	upstream	NM_001035511	SDHC	succinate dehydrogenase cytochrome b560 subunit,	2.63492	1.39776	2.63492	up	chr1	+	161284165	161334535
CN413083	lincRNA-UFC1	4.63202	2.21164	4.63202	up	lincRNA	687	chr1	+	161106389	161107075	downstream	NM_001035511	SDHC	succinate dehydrogenase cytochrome b560 subunit,	2.63492	1.39776	2.63492	up	chr1	+	161284165	161334535
AK057381		2.0872	1.06157	2.0872	up	misc_RNA	1873	chr14	+	23763060	23764935	downstream	NM_172314	IL25	interleukin-25 isoform 2 precursor	-2.89081	-1.53147	2.89081	down	chr14	+	23842017	23845612
ENST00000502790	RP11-692D12.1	-2.42015	-1.2751	2.42015	down	Ensembl	685	chr4	+	74124925	74183670	downstream	NM_177532	RASSF6	ras association domain-containing protein 6	-3.1612	-1.66047	3.1612	down	chr4	-	74438861	74486134
chr5:78812894-78817242+	lincRNA-PAPD4	-9.59936	-3.26294	9.59936	down	lincRNA	4349	chr5	+	78812894	78817242	downstream	NM_153610	CMYA5	cardiomyopathy-associated protein 5	-6.98969	-2.80523	6.98969	down	chr5	+	78985658	79096049
CD516039	lincRNA-THBS4	2.81688	1.4941	2.81688	up	lincRNA	510	chr5	+	79306992	79307717	upstream	NM_153610	CMYA5	cardiomyopathy-associated protein 5	-6.98969	-2.80523	6.98969	down	chr5	+	78985658	79096049
AW452601	lincRNA-MTX3	-2.42861	-1.28013	2.42861	down	lincRNA	524	chr5	-	79307192	79307717	downstream	NM_153610	CMYA5	cardiomyopathy-associated protein 5	-6.98969	-2.80523	6.98969	down	chr5	+	78985658	79096049
NR_024279	FLJ37453	-3.13715	-1.64946	3.13715	down	RefSeq_NR	2732	chr1	-	16160709	16174642	downstream	NM_207348	SLC25A34	solute carrier family 25 member 34	-2.30309	-1.20357	2.30309	down	chr1	+	16062808	16067884
BG273037	lincRNA-CDH5-2	-2.07064	-1.05008	2.07064	down	lincRNA	387	chr16	+	66296092	66296464	downstream	NM_001795	CDH5	cadherin-5 preproprotein	2.08871	1.06261	2.08871	up	chr16	+	66400524	66438689
uc002eoo.1	AK056683	-5.1563	-2.36634	5.1563	down	UCSC_knowngene	2147	chr16	+	66442426	66446038	upstream	NM_001795	CDH5	cadherin-5 preproprotein	2.08871	1.06261	2.08871	up	chr16	+	66400524	66438689
ENST00000420752	RP11-507K13.4	8.97264	3.16553	8.97264	up	Ensembl	1053	chr10	+	50979886	50981345	upstream	NM_001042427	C10orf53	hypothetical protein LOC282966 isoform b	-6.75515	-2.75599	6.75515	down	chr10	+	50887683	50902948
NR_026938	LOC221442	-3.19809	-1.67721	3.19809	down	RefSeq_NR	4585	chr6	+	41068772	41108567	overlap	NM_021705	NFYA	nuclear transcription factor Y subunit alpha	2.01368	1.00984	2.01368	up	chr6	+	41040706	41070146
uc003che.2	BC040563	-5.39832	-2.43251	5.39832	down	UCSC_knowngene	3263	chr3	-	37847343	37903250	upstream	NM_015873	VILL	villin-like protein	-13.3412	-3.73781	13.3412	down	chr3	+	38035077	38048676
AK310900	lincRNA-SYT9	-6.03893	-2.59429	6.03893	down	lincRNA	4074	chr11	+	7041699	7159136	upstream	NM_001004684	OR2D3	olfactory receptor 2D3	-3.87838	-1.95545	3.87838	down	chr11	+	6942232	6943225
AA863287	lincRNA-OR2AG2	-3.59825	-1.8473	3.59825	down	lincRNA	519	chr11	+	6754957	6767657	downstream	NM_001004684	OR2D3	olfactory receptor 2D3	-3.87838	-1.95545	3.87838	down	chr11	+	6942232	6943225
AB051448		4.03378	2.01213	4.03378	up	NRED	6475	chr22	-	45373647	45476304	downstream	NM_015366	PRR5	proline-rich protein 5 isoform 2	-9.46551	-3.24268	9.46551	down	chr22	+	45072687	45133561
ENST00000442418	RP11-86H7.1	-2.68842	-1.42676	2.68842	down	Ensembl	748	chr1	-	95104016	95285652	downstream	NM_001993	F3	tissue factor isoform 1 precursor	2.56312	1.3579	2.56312	up	chr1	-	94994731	95007413
AF289584	lincRNA-NKD1	-4.22266	-2.07815	4.22266	down	lincRNA	2142	chr16	+	50369047	50668127	upstream	NM_182922	HEATR3	HEAT repeat-containing protein 3	2.58934	1.37259	2.58934	up	chr16	+	50099880	50139375
NR_024490	LOC100129387	2.11404	1.08	2.11404	up	RefSeq_NR	4139	chr15	+	50646370	50650501	upstream	NM_001159629	SLC27A2	very long-chain acyl-CoA synthetase isoform 2	-2.10074	-1.0709	2.10074	down	chr15	+	50474392	50528589
ENST00000500703	AC012170.2	2.37858	1.2501	2.37858	up	Ensembl	3624	chr15	+	50655997	50660476	upstream	NM_001159629	SLC27A2	very long-chain acyl-CoA synthetase isoform 2	-2.10074	-1.0709	2.10074	down	chr15	+	50474392	50528589
ENST00000411949	AC006460.2	2.92888	1.55035	2.92888	up	Ensembl	717	chr2	-	191541760	191573442	upstream	NM_014905	GLS	glutaminase kidney isoform, mitochondrial	2.52426	1.33586	2.52426	up	chr2	+	191745546	191829776
AI808306	lincRNA-COPS8-3	-2.2524	-1.17146	2.2524	down	lincRNA	451	chr2	-	238206329	238206871	upstream	NM_022449	RAB17	ras-related protein Rab-17	2.04479	1.03195	2.04479	up	chr2	-	238482964	238499769
AF083120		2.34474	1.22943	2.34474	up	misc_RNA	158	chr11	+	62321164	62321291	downstream	NM_000327	ROM1	rod outer segment membrane protein 1	-2.00584	-1.00421	2.00584	down	chr11	+	62380212	62382592
ENST00000396599	AC005062.3	-2.08186	-1.05787	2.08186	down	Ensembl	483	chr7	+	20042387	20042870	upstream	NM_001002926	TWISTNB	DNA-directed RNA polymerase I subunit RPA43	3.29589	1.72067	3.29589	up	chr7	-	19735084	19748660
AK092616		-2.14753	-1.10268	2.14753	down	misc_RNA	1806	chrX	+	15749866	15751672	downstream	NM_005089	ZRSR2	U2 small nuclear ribonucleoprotein auxiliary	-2.21805	-1.14929	2.21805	down	chrX	+	15808573	15841382
ENST00000380334	CA5BP	2.244	1.16607	2.244	up	Ensembl	889	chrX	+	15693668	15721472	downstream	NM_005089	ZRSR2	U2 small nuclear ribonucleoprotein auxiliary	-2.21805	-1.14929	2.21805	down	chrX	+	15808573	15841382
BC017416		11.7211	3.55103	11.7211	up	misc_RNA	1439	chr12	-	68820110	68821517	upstream	NM_020401	NUP107	nuclear pore complex protein Nup107	5.66322	2.50162	5.66322	up	chr12	+	69080730	69136473
BM728564	lincRNA-HHAT	-2.66878	-1.41618	2.66878	down	lincRNA	568	chr1	+	210425878	210426445	downstream	NM_001170587	HHAT	protein-cysteine N-palmitoyltransferase HHAT	-2.37622	-1.24867	2.37622	down	chr1	+	210502249	210849638
ENST00000510743	AP000998.1	3.85494	1.94671	3.85494	up	Ensembl	2633	chr21	+	19375900	19378601	downstream	NM_024944	CHODL	chondrolectin isoform a precursor	-2.11504	-1.08069	2.11504	down	chr21	+	19617149	19639687
chr11:118574515-118584690-	lincRNA-TREH	-6.19672	-2.6315	6.19672	down	lincRNA	10176	chr11	-	118574515	118584690	upstream	NM_181721	FOXR1	forkhead box protein R1	8.66372	3.11499	8.66372	up	chr11	+	118842416	118851995
CN413083	lincRNA-UFC1	4.63202	2.21164	4.63202	up	lincRNA	687	chr1	+	161106389	161107075	upstream	NM_152366	KLHDC9	kelch domain-containing protein 9 isoform a	-3.34828	-1.74342	3.34828	down	chr1	+	161068180	161070138
AF191495	lincRNA-F11R	4.10745	2.03824	4.10745	up	lincRNA	2187	chr1	-	160967605	161008711	upstream	NM_152366	KLHDC9	kelch domain-containing protein 9 isoform a	-3.34828	-1.74342	3.34828	down	chr1	+	161068180	161070138
chr10:44001669-44017744-	lincRNA-HNRNPF	-2.55255	-1.35194	2.55255	down	lincRNA	16076	chr10	-	44001669	44017744	downstream	NM_001098204	HNRNPF	heterogeneous nuclear ribonucleoprotein F	2.47086	1.30502	2.47086	up	chr10	-	43881064	43904696
BF116112	lincRNA-C5orf53-1	2.1072	1.07533	2.1072	up	lincRNA	588	chr5	-	139527790	139528378	upstream	NM_032412	C5orf32	hypothetical protein LOC84418	-2.52792	-1.33795	2.52792	down	chr5	+	139554652	139623374
AX747237	lincRNA-KIFC3	2.27272	1.18442	2.27272	up	lincRNA	3159	chr16	-	57792130	57896733	upstream	NM_199046	TEPP	testis, prostate and placenta-expressed protein	-3.95018	-1.98192	3.95018	down	chr16	+	58010338	58022017
DA922283	lincRNA-TH	4.68973	2.2295	4.68973	up	lincRNA	568	chr11	-	2229882	2230451	downstream	NM_006757	TNNT3	troponin T, fast skeletal muscle isoform 1	-3.48146	-1.79969	3.48146	down	chr11	+	1940798	1959936
ENST00000391359	RP1-122K4.3	-7.77177	-2.95824	7.77177	down	Ensembl	544	chrX	-	13998184	14006939	downstream	NM_001001994	GPM6B	neuronal membrane glycoprotein M6-b isoform 4	-2.27383	-1.18512	2.27383	down	chrX	-	13792092	13956831
ENST00000451822	AP002959.1	3.81648	1.93224	3.81648	up	Ensembl	1071	chr11	-	121232558	121233631	downstream	NM_006918	SC5DL	lathosterol oxidase	2.21556	1.14767	2.21556	up	chr11	+	121163387	121184119
chr1:39116163-39128263+	lincRNA-RRAGC-1	2.33378	1.22267	2.33378	up	lincRNA	12101	chr1	+	39116163	39128263	downstream	NM_017821	RHBDL2	rhomboid-related protein 2	-2.20868	-1.14319	2.20868	down	chr1	-	39351478	39407456
BU663229	lincRNA-POU3F1-1	-3.57082	-1.83626	3.57082	down	lincRNA	555	chr1	-	39183439	39183984	upstream	NM_017821	RHBDL2	rhomboid-related protein 2	-2.20868	-1.14319	2.20868	down	chr1	-	39351478	39407456
BI029614	lincRNA-ERF	-2.17395	-1.12032	2.17395	down	lincRNA	493	chr19	-	42777698	42778182	upstream	NM_173633	TMEM145	transmembrane protein 145	-3.32199	-1.73205	3.32199	down	chr19	+	42817476	42829214
BF108976	lincRNA-MYO1B-4	-2.51868	-1.33267	2.51868	down	lincRNA	509	chr2	+	192068946	192069452	upstream	NM_014905	GLS	glutaminase kidney isoform, mitochondrial	2.52426	1.33586	2.52426	up	chr2	+	191745546	191829776
BM956062	lincRNA-PGS1	5.70521	2.51228	5.70521	up	lincRNA	174	chr17	+	76360558	76360732	upstream	NM_004710	SYNGR2	synaptogyrin-2	2.86885	1.52047	2.86885	up	chr17	+	76164670	76169009
uc002uwa.2	AOX2	3.12505	1.64388	3.12505	up	UCSC_knowngene	978	chr2	+	201635394	201658962	upstream	NM_001100424	SPATS2L	SPATS2-like protein isoform b	2.20823	1.14289	2.20823	up	chr2	+	201170984	201346986
chr13:103635874-103659174+	lincRNA-SLC10A2-3	3.86164	1.94921	3.86164	up	lincRNA	23301	chr13	+	103635874	103659174	upstream	NM_001159596	BIVM	basic immunoglobulin-like variable	2.38948	1.2567	2.38948	up	chr13	+	103451398	103493888
uc002scv.1	CR605149	-4.5857	-2.19714	4.5857	down	UCSC_knowngene	1471	chr2	+	64455601	64479960	downstream	NM_014181	HSPC159	galectin-related protein	2.9511	1.56125	2.9511	up	chr2	+	64681326	64688517
ENST00000431020	AC012368.2	-2.8631	-1.51758	2.8631	down	Ensembl	3307	chr2	-	64412211	64432619	upstream	NM_014181	HSPC159	galectin-related protein	2.9511	1.56125	2.9511	up	chr2	+	64681326	64688517
ENST00000441630	AC008074.3	-2.66305	-1.41308	2.66305	down	Ensembl	723	chr2	-	64622353	64680932	upstream	NM_014181	HSPC159	galectin-related protein	2.9511	1.56125	2.9511	up	chr2	+	64681326	64688517
chr14:54676002-54680773-	lincRNA-BMP4-2	-2.20844	-1.14303	2.20844	down	lincRNA	4772	chr14	-	54676002	54680773	upstream	NM_005776	CNIH	protein cornichon homolog	2.60945	1.38374	2.60945	up	chr14	-	54893646	54908148
AK094723		12.8915	3.68835	12.8915	up	misc_RNA	2466	chr17	+	39821817	39824283	upstream	NM_000422	KRT17	keratin, type I cytoskeletal 17	2.24526	1.16688	2.24526	up	chr17	-	39775691	39780882
AK095243		4.05763	2.02064	4.05763	up	misc_RNA	2460	chr17	-	39805306	39807765	downstream	NM_000422	KRT17	keratin, type I cytoskeletal 17	2.24526	1.16688	2.24526	up	chr17	-	39775691	39780882
uc001rhc.2	BC041929	-4.18369	-2.06478	4.18369	down	UCSC_knowngene	1355	chr12	+	26287896	26334216	upstream	NM_001164747	RASSF8	ras association domain-containing protein 8	-4.67356	-2.22452	4.67356	down	chr12	+	26126687	26225807
AF191495	lincRNA-F11R	4.10745	2.03824	4.10745	up	lincRNA	2187	chr1	-	160967605	161008711	upstream	NM_004106	FCER1G	high affinity immunoglobulin epsilon receptor	4.25314	2.08853	4.25314	up	chr1	+	161185086	161189038
CN413083	lincRNA-UFC1	4.63202	2.21164	4.63202	up	lincRNA	687	chr1	+	161106389	161107075	downstream	NM_004106	FCER1G	high affinity immunoglobulin epsilon receptor	4.25314	2.08853	4.25314	up	chr1	+	161185086	161189038
BX098775	lincRNA-JAK2-1	4.02705	2.00972	4.02705	up	lincRNA	478	chr9	-	5132032	5165921	downstream	NM_004972	JAK2	tyrosine-protein kinase JAK2	7.77208	2.9583	7.77208	up	chr9	+	4985244	5128183
AI553950	lincRNA-INSL6	5.88501	2.55704	5.88501	up	lincRNA	449	chr9	+	5131978	5164252	upstream	NM_004972	JAK2	tyrosine-protein kinase JAK2	7.77208	2.9583	7.77208	up	chr9	+	4985244	5128183
BC036853	lincRNA-PDCD1LG2-2	2.56542	1.3592	2.56542	up	lincRNA	1660	chr9	-	5357968	5630071	downstream	NM_004972	JAK2	tyrosine-protein kinase JAK2	7.77208	2.9583	7.77208	up	chr9	+	4985244	5128183
BE048618	lincRNA-PTHLH-2	-4.09924	-2.03536	4.09924	down	lincRNA	518	chr12	-	28286181	28605460	overlap	NM_018318	CCDC91	coiled-coil domain-containing protein 91	2.43404	1.28335	2.43404	up	chr12	+	28410132	28703099
BG399904	lincRNA-PTHLH-1	-3.85982	-1.94853	3.85982	down	lincRNA	473	chr12	-	28173729	28174202	upstream	NM_018318	CCDC91	coiled-coil domain-containing protein 91	2.43404	1.28335	2.43404	up	chr12	+	28410132	28703099
NR_027108	LOC285593	2.05843	1.04154	2.05843	up	RefSeq_NR	1781	chr5	+	173006645	173012074	upstream	NM_003714	STC2	stanniocalcin-2 precursor	4.46873	2.15987	4.46873	up	chr5	-	172741725	172756506
BF969023	lincRNA-ZNF800	-2.58526	-1.37031	2.58526	down	lincRNA	778	chr7	-	127188015	127188758	upstream	NM_014390	SND1	staphylococcal nuclease domain-containing	2.01088	1.00783	2.01088	up	chr7	+	127292201	127732659
AX747038	lincRNA-BANK1-2	-58.5261	-5.87101	58.5261	down	lincRNA	3544	chr4	+	102341117	102995967	downstream	NM_001135147	SLC39A8	zinc transporter ZIP8 isoform b	3.975	1.99095	3.975	up	chr4	-	103172197	103266410
DQ269985	lincRNA-AKR1C3-2	-10.4967	-3.39186	10.4967	down	lincRNA	972	chr10	+	5005636	5149693	overlap	NM_001353	AKR1C1	aldo-keto reductase family 1 member C1	-37.1991	-5.21719	37.1991	down	chr10	+	5005453	5020158
ENST00000427165	RP11-499O7.5	-10.8503	-3.43966	10.8503	down	Ensembl	609	chr10	-	5164278	5177418	downstream	NM_001353	AKR1C1	aldo-keto reductase family 1 member C1	-37.1991	-5.21719	37.1991	down	chr10	+	5005453	5020158
chr3:13577339-13583378-	lincRNA-HDAC11-1	-3.16083	-1.6603	3.16083	down	lincRNA	6040	chr3	-	13577339	13583378	upstream	NM_004625	WNT7A	protein Wnt-7a precursor	-2.04744	-1.03382	2.04744	down	chr3	-	13860081	13921618
BX093893	lincRNA-GLIPR1	2.29096	1.19595	2.29096	up	lincRNA	464	chr12	+	75841430	75841894	upstream	NM_152436	GLIPR1L2	GLIPR1-like protein 2	-2.83067	-1.50114	2.83067	down	chr12	+	75784888	75817820
chr1:149731347-149744257-	lincRNA-PPIAL4B-1	-5.38289	-2.42838	5.38289	down	lincRNA	12911	chr1	-	149731347	149744257	upstream	NM_001040874	HIST2H2AA4	histone H2A type 2-A	-3.28476	-1.71579	3.28476	down	chr1	+	149822627	149823161
AK291502	lincRNA-HIST2H2BF	8.26226	3.04654	8.26226	up	lincRNA	1686	chr1	+	149369293	149763584	downstream	NM_001040874	HIST2H2AA4	histone H2A type 2-A	-3.28476	-1.71579	3.28476	down	chr1	+	149822627	149823161
NR_026769	PPBPL2	-2.56244	-1.35752	2.56244	down	RefSeq_NR	1362	chr4	-	74919754	74921116	downstream	NM_002993	CXCL6	C-X-C motif chemokine 6	3.25337	1.70193	3.25337	up	chr4	+	74702272	74704477
DY655635	lincRNA-C16orf75-2	-2.69833	-1.43207	2.69833	down	lincRNA	379	chr16	-	11477618	11478868	upstream	NM_003498	SNN	stannin	2.06139	1.04362	2.06139	up	chr16	+	11762288	11773015
AK226157	lincRNA-EHF	-2.78283	-1.47655	2.78283	down	lincRNA	4584	chr11	-	34874640	34912288	upstream	NM_001001391	CD44	CD44 antigen isoform 4 precursor	-2.1158	-1.0812	2.1158	down	chr11	+	35160416	35253949
chr6:24977604-24998368+	lincRNA-LRRC16A-2	-3.0603	-1.61368	3.0603	down	lincRNA	20765	chr6	+	24977604	24998368	upstream	NM_014722	FAM65B	family with sequence similarity 65, member B	-5.27283	-2.39858	5.27283	down	chr6	-	24804512	24911195
ENST00000510784	AL160400.1	-2.45538	-1.29595	2.45538	down	Ensembl	1029	chr6	-	25015180	25042398	downstream	NM_014722	FAM65B	family with sequence similarity 65, member B	-5.27283	-2.39858	5.27283	down	chr6	-	24804512	24911195
AK300950	lincRNA-FAM65B-1	-21.1847	-4.40495	21.1847	down	lincRNA	2415	chr6	-	24840552	25042246	overlap	NM_014722	FAM65B	family with sequence similarity 65, member B	-5.27283	-2.39858	5.27283	down	chr6	-	24804512	24911195
AK300950	lincRNA-FAM65B-1	-21.1847	-4.40495	21.1847	down	lincRNA	2415	chr6	-	24840552	25042246	downstream	NM_001168377	KIAA0319	KIAA0319 isoform d precursor	-9.24414	-3.20854	9.24414	down	chr6	-	24544331	24646383
AK226157	lincRNA-EHF	-2.78283	-1.47655	2.78283	down	lincRNA	4584	chr11	-	34874640	34912288	upstream	NM_000610	CD44	CD44 antigen isoform 1 precursor	2.54539	1.34789	2.54539	up	chr11	+	35160416	35253949
uc001ujx.1	EP400NL	818.874	9.6775	818.874	up	UCSC_knowngene	4335	chr12	+	132602690	132613429	downstream	NM_024078	NOC4L	nucleolar complex protein 4 homolog	2.36508	1.24189	2.36508	up	chr12	+	132628992	132636986
[truncated: 377 more rows]

## Sheet: M1 vs T4
# Condition pairs: M1 vs T4 # Fold Change cut-off: 2.0 This table contains the differentially expressed lincRNA and nearby coding gene pairs (distance < 300 kb). # Column A: seqname, the sequence identifier. # Column B: GeneSymbol, the symbol of the LncRNA. # Column C: Fold change - LncRNAs, the ratio of normalized intensities between two samples, positive value indicates up-regulation, and negat…
[truncated: 1,462 more rows]

[truncated: 2 more sheets: M2 vs T3, M3 vs T1]
